# Supplementary material for: Mutant huntingtin's effects on striatal gene expression in mice recapitulate changes observed in human Huntington's disease brain and do not differ with mutant huntingtin length or wild-type huntingtin dosage
Source: Oxford University Press journal article supplement (doi:10.1093/hmg/ddm133), 2007-05-21
Supplement: kuhn_hmg-2007-d-00329_tables1.pdf [file kuhn_hmg-2007-d-00329_tables1.pdf]

| Probeset ID | log2FC      | mod t       | Nominal p   | FDR adj. p  |
|-------------|-------------|-------------|-------------|-------------|
| 1007_s_at   | 0.495420688 | 7.026508897 | 2.53E-09    | 1.71E-07    |
| 1053_at     | -0.0464067  | -1.77827408 | 0.080549702 | 0.184691592 |
| 117_at      | 0.024196894 | 0.358998923 | 0.720886934 | 0.83676282  |
| 121_at      | 0.04272499  | 1.183016461 | 0.241582782 | 0.411919335 |
| 1255_g_at   | -0.42361227 | -6.55232264 | 1.59E-08    | 6.27E-07    |
| 1294_at     | 0.1489476   | 4.307062297 | 6.40E-05    | 0.000505137 |
| 1316_at     | 0.004819766 | 0.145452397 | 0.884853144 | 0.9383907   |
| 1320_at     | 0.00350443  | 0.143345559 | 0.886509345 | 0.939234631 |
| 1405_i_at   | 0.018861089 | 0.567481175 | 0.572556296 | 0.730792117 |
| 1431_at     | -0.00830385 | -0.43499892 | 0.665161994 | 0.798308712 |
| 1438_at     | -0.03126597 | -0.68624842 | 0.495264442 | 0.668461197 |
| 1487_at     | 0.030348606 | 1.109282693 | 0.271842504 | 0.447771332 |
| 1494_f_at   | 0.046809007 | 1.387617384 | 0.17051083  | 0.323148645 |
| 1598_g_at   | 0.095683179 | 3.71208927  | 0.000459881 | 0.002669566 |
| 160020_at   | 0.033313902 | 1.069367141 | 0.289291949 | 0.46761474  |
| 1729_at     | 0.138857175 | 4.917599607 | 7.44E-06    | 8.38E-05    |
| 177_at      | 0.02865088  | 0.927512239 | 0.357467397 | 0.540512668 |
| 1773_at     | -0.03574968 | -0.65392398 | 0.515720318 | 0.685867354 |
| 179_at      | -0.03074012 | -0.89322006 | 0.375395079 | 0.558382376 |
| 1861_at     | 0.083632264 | 1.823571725 | 0.073320864 | 0.171617055 |
| 200000_s_at | -0.02075294 | -0.42235952 | 0.674309203 | 0.804253403 |
| 200001_at   | -0.13275167 | -2.34292092 | 0.02255073  | 0.06785412  |
| 200002_at   | -0.02663882 | -0.48720584 | 0.62793111  | 0.772460698 |
| 200003_s_at | 0.17023453  | 2.695659168 | 0.009155426 | 0.032505107 |
| 200004_at   | 0.115088618 | 1.825741146 | 0.072988769 | 0.171018876 |
| 200005_at   | 0.005996216 | 0.110867106 | 0.912100797 | 0.953557014 |
| 200006_at   | -0.02730949 | -0.54880363 | 0.585226476 | 0.74057654  |
| 200007_at   | 0.085660148 | 1.364138219 | 0.177743616 | 0.333028034 |
| 200008_s_at | -0.30614881 | -3.3820094  | 0.001287356 | 0.006299627 |
| 200009_at   | -0.04801789 | -0.67713708 | 0.500985023 | 0.673465158 |
| 200010_at   | 0.104830936 | 1.770317336 | 0.081878895 | 0.186853005 |
| 200011_s_at | -0.52266422 | -6.66970107 | 1.01E-08    | 4.50E-07    |
| 200012_x_at | -0.10547236 | -1.67368001 | 0.099526914 | 0.216861536 |
| 200013_at   | -0.14208571 | -3.17392696 | 0.002397075 | 0.010604066 |
| 200014_s_at | 0.17769876  | 2.680680443 | 0.009527534 | 0.033543766 |
| 200015_s_at | 0.326301797 | 4.998859131 | 5.54E-06    | 6.55E-05    |
| 200016_x_at | -0.06461601 | -0.86850072 | 0.388665403 | 0.571445675 |
| 200017_at   | 0.035868935 | 0.876885025 | 0.384131883 | 0.566836314 |
| 200018_at   | 0.013870082 | 0.276558168 | 0.783093067 | 0.876043041 |
| 200019_s_at | 0.027693922 | 0.568233525 | 0.572048739 | 0.730348292 |
| 200020_at   | 0.2504862   | 3.532216129 | 0.000810971 | 0.00427909  |
| 200021_at   | -0.06227197 | -2.45766174 | 0.016964371 | 0.053862723 |
| 200022_at   | 0.108773859 | 2.321038166 | 0.023785874 | 0.070921227 |
| 200023_s_at | 0.004112286 | 0.063769392 | 0.949371007 | 0.974041827 |
| 200024_at   | -0.05905033 | -1.30722191 | 0.196246445 | 0.357009245 |
| 200025_s_at | 0.003129387 | 0.076314111 | 0.939429301 | 0.968333385 |
| 200026_at   | -0.06986478 | -2.01832536 | 0.048144895 | 0.123816991 |
| 200027_at   | -0.13468456 | -2.92024439 | 0.004958735 | 0.019589481 |
| 200028_s_at | 0.311770759 | 4.763281928 | 1.29E-05    | 0.000132182 |
| 200029_at   | 0.020228494 | 0.453001058 | 0.652221817 | 0.789223026 |
| 200030_s_at | -0.25870793 | -3.5810281  | 0.000696282 | 0.003778691 |
| 200031_s_at | 0.051451373 | 1.325292316 | 0.190221257 | 0.34907483  |
| 200032_s_at | -0.05414757 | -1.24128491 | 0.219449278 | 0.386309562 |
| 200033_at   | 0.187161264 | 2.162327944 | 0.034689324 | 0.095622972 |
| 200034_s_at | -0.15513683 | -3.09523358 | 0.003014651 | 0.01290154  |
| 200035_at   | 0.100632925 | 2.401905723 | 0.01950147  | 0.060386594 |
| 200036_s_at | -0.10498168 | -1.31223961 | 0.194559193 | 0.354655056 |
| 200037_s_at | 0.068357324 | 1.090701384 | 0.279871413 | 0.457003246 |
| 200038_s_at | 0.028983415 | 0.478131297 | 0.634336706 | 0.777089416 |
| 200039_s_at | -0.05781245 | -1.15937476 | 0.251008532 | 0.423799726 |
| 200040_at   | -0.16435263 | -1.79606818 | 0.077642126 | 0.179389652 |
| 200041_s_at | 0.190069212 | 2.905390906 | 0.005168626 | 0.02025572  |
| 200042_at   | 0.112958524 | 2.323674873 | 0.023633925 | 0.07056232  |
| 200043_at   | 0.025625284 | 0.585217129 | 0.560649877 | 0.722153624 |
| 200044_at   | 0.025847429 | 0.663780288 | 0.509435636 | 0.680440294 |
| 200045_at   | -0.02984813 | -0.77164102 | 0.443429485 | 0.623656735 |
| 200046_at   | 0.152281563 | 1.848162203 | 0.069629918 | 0.165087549 |
| 200047_s_at | 0.334682349 | 4.255695693 | 7.62E-05    | 0.000587572 |
| 200048_s_at | -0.1503245  | -2.68535938 | 0.009409838 | 0.033231489 |
| 200049_at   | -0.07742954 | -2.3577062  | 0.021748887 | 0.065920735 |
| 200050_at   | 0.174318581 | 2.635887293 | 0.010724337 | 0.036882805 |
| 200051_at   | 0.161890171 | 3.115029223 | 0.002846615 | 0.01229425  |
| 200052_s_at | -0.08927759 | -1.05487616 | 0.295814341 | 0.474711603 |
| 200053_at   | -0.04141231 | -1.19602354 | 0.236507243 | 0.405819769 |

|             |             |             |             |             |
|-------------|-------------|-------------|-------------|-------------|
| 200054_at   | 0.024492496 | 0.651513801 | 0.517263375 | 0.686917892 |
| 200055_at   | 0.098254286 | 2.544690146 | 0.013594204 | 0.044808037 |
| 200056_s_at | -0.24684614 | -2.89351214 | 0.005342375 | 0.020810723 |
| 200057_s_at | 0.097204523 | 2.829065799 | 0.006383019 | 0.024105958 |
| 200058_s_at | 0.179065998 | 2.658860659 | 0.01009438  | 0.035164157 |
| 200059_s_at | 0.134959662 | 1.479877843 | 0.144265282 | 0.286123368 |
| 200060_s_at | 0.013750596 | 0.337060409 | 0.737276311 | 0.847441722 |
| 200061_s_at | 0.049966968 | 1.081859005 | 0.28374967  | 0.461200034 |
| 200062_s_at | 0.067507272 | 1.194518652 | 0.237090483 | 0.406461615 |
| 200063_s_at | 0.092943175 | 1.482641553 | 0.14353102  | 0.28500859  |
| 200064_at   | -0.15312612 | -1.97773672 | 0.052670148 | 0.132840534 |
| 200065_s_at | -0.21263338 | -4.32724521 | 5.97E-05    | 0.000476987 |
| 200066_at   | 0.194470516 | 2.456050538 | 0.017033307 | 0.054039365 |
| 200067_x_at | -0.06903047 | -1.42341646 | 0.159921123 | 0.30822817  |
| 200068_s_at | 0.128778893 | 3.113854221 | 0.002856339 | 0.012326255 |
| 200069_at   | 0.17397696  | 4.228162929 | 8.37E-05    | 0.00063384  |
| 200070_at   | 0.204443585 | 4.440139739 | 4.04E-05    | 0.000345206 |
| 200071_at   | 0.135441649 | 1.657567378 | 0.102752528 | 0.222200414 |
| 200072_s_at | 0.245317899 | 2.81391836  | 0.006653368 | 0.024956133 |
| 200073_s_at | 0.159928529 | 2.147391357 | 0.035912402 | 0.098249085 |
| 200074_s_at | -0.29021294 | -4.02686931 | 0.00016477  | 0.001117725 |
| 200075_s_at | -0.31570629 | -4.83757036 | 9.92E-06    | 0.000106166 |
| 200076_s_at | 0.064189938 | 1.676904388 | 0.098891475 | 0.215719338 |
| 200077_s_at | -0.19041813 | -3.6872503  | 0.000497786 | 0.002854016 |
| 200078_s_at | -0.26839662 | -3.21160562 | 0.002145411 | 0.009667545 |
| 200079_s_at | -0.13676006 | -2.39680099 | 0.019749953 | 0.060961863 |
| 200080_s_at | 0.302167507 | 4.247192205 | 7.85E-05    | 0.000601334 |
| 200081_s_at | 0.092518861 | 1.438584172 | 0.155591209 | 0.302041359 |
| 200082_s_at | -0.11045329 | -1.51807314 | 0.134375956 | 0.271731154 |
| 200083_at   | 0.082412441 | 1.351182084 | 0.18183387  | 0.338449848 |
| 200084_at   | -0.18806818 | -3.04758495 | 0.003457919 | 0.014501392 |
| 200085_s_at | -0.06528808 | -1.01797638 | 0.312876117 | 0.493891615 |
| 200086_s_at | -0.28546468 | -5.45430107 | 1.04E-06    | 1.64E-05    |
| 200087_s_at | -0.0495089  | -0.57623646 | 0.566663357 | 0.726725443 |
| 200088_x_at | 0.173082422 | 2.603741833 | 0.011666043 | 0.039548639 |
| 200089_s_at | -0.12694298 | -2.6987289  | 0.009080828 | 0.032280845 |
| 200090_at   | 0.28038602  | 3.786698967 | 0.000361926 | 0.002176132 |
| 200091_s_at | 0.05058707  | 0.960317497 | 0.340843467 | 0.523793969 |
| 200092_s_at | -0.02180934 | -0.45963333 | 0.647481122 | 0.786148893 |
| 200093_s_at | -0.45147518 | -4.16313783 | 0.000104371 | 0.000763926 |
| 200094_s_at | -0.06905553 | -1.70104563 | 0.094238736 | 0.208140231 |
| 200095_x_at | 0.073024416 | 1.914016985 | 0.060508422 | 0.148064082 |
| 200096_s_at | 0.303043109 | 3.956817554 | 0.000207781 | 0.00136021  |
| 200097_s_at | -0.28207572 | -3.05658444 | 0.003369794 | 0.014173051 |
| 200098_s_at | 0.131545618 | 2.11235074  | 0.038930694 | 0.104598447 |
| 200099_s_at | -0.09943634 | -1.30340392 | 0.197537634 | 0.358526313 |
| 200593_s_at | 0.074138596 | 1.336252778 | 0.186635428 | 0.344545853 |
| 200594_x_at | 0.1110143   | 2.005641278 | 0.04952166  | 0.126549375 |
| 200595_s_at | 0.142874454 | 1.776750597 | 0.080802803 | 0.185093562 |
| 200596_s_at | 0.146794235 | 2.444765414 | 0.017523247 | 0.055338394 |
| 200597_at   | 0.105851374 | 1.764678274 | 0.082831923 | 0.188546618 |
| 200598_s_at | -0.16777314 | -1.16186657 | 0.250002824 | 0.422408461 |
| 200599_s_at | -0.04579453 | -0.47570401 | 0.636054896 | 0.778191722 |
| 200600_at   | 0.460266569 | 4.78902903  | 1.18E-05    | 0.000122381 |
| 200601_at   | 0.23430493  | 4.934061601 | 7.01E-06    | 7.99E-05    |
| 200602_at   | -0.09794199 | -1.57027341 | 0.121738992 | 0.252246794 |
| 200603_at   | -0.07424966 | -0.96834927 | 0.336852029 | 0.519625531 |
| 200604_s_at | -0.37014736 | -3.07165999 | 0.003226855 | 0.013657977 |
| 200605_s_at | -0.36662381 | -3.11264304 | 0.002866395 | 0.012352224 |
| 200606_at   | 0.074824003 | 1.510992565 | 0.136167492 | 0.274348461 |
| 200607_s_at | -0.11749189 | -1.93785876 | 0.057466531 | 0.142214459 |
| 200608_s_at | 0.228963177 | 2.859910647 | 0.005863579 | 0.022467353 |
| 200609_s_at | 0.341020263 | 4.782793379 | 1.21E-05    | 0.000124793 |
| 200610_s_at | 0.034518581 | 0.576385679 | 0.566563179 | 0.726670731 |
| 200611_s_at | 0.240724439 | 3.084428271 | 0.003110244 | 0.013244689 |
| 200612_s_at | -0.12483153 | -2.75007262 | 0.007912888 | 0.028826443 |
| 200613_at   | -0.29761302 | -3.46342076 | 0.00100348  | 0.005109663 |
| 200614_at   | -0.3093663  | -4.24926204 | 7.79E-05    | 0.000598124 |
| 200615_s_at | -0.21411851 | -3.41234526 | 0.001173676 | 0.00582498  |
| 200616_s_at | 0.293817381 | 4.013854327 | 0.00017205  | 0.001160295 |
| 200617_at   | 0.111906534 | 2.994785297 | 0.004019791 | 0.016457938 |
| 200618_at   | 0.115332208 | 2.586247217 | 0.012209601 | 0.041052626 |
| 200619_at   | -0.02065396 | -0.42950983 | 0.669128306 | 0.800690804 |
| 200620_at   | 0.012573163 | 0.20067719  | 0.841646272 | 0.913026244 |
| 200621_at   | 0.609702319 | 8.047205178 | 4.78E-11    | 1.38E-08    |

|             |             |             |             |             |
|-------------|-------------|-------------|-------------|-------------|
| 200622_x_at | -0.71740204 | -6.46036707 | 2.26E-08    | 8.09E-07    |
| 200623_s_at | -0.98971287 | -7.14658907 | 1.58E-09    | 1.26E-07    |
| 200624_s_at | -0.30822964 | -3.54565387 | 0.00077772  | 0.004139318 |
| 200625_s_at | -0.254295   | -4.21632085 | 8.72E-05    | 0.000656086 |
| 200626_s_at | -0.24351727 | -2.91210876 | 0.005072698 | 0.019945961 |
| 200627_at   | 0.140805075 | 1.418971528 | 0.161207566 | 0.310039097 |
| 200628_s_at | -0.11276404 | -0.99167656 | 0.325434916 | 0.507602599 |
| 200629_at   | -0.00586173 | -0.04548809 | 0.96387302  | 0.981418746 |
| 200630_x_at | 0.140102832 | 3.693948997 | 0.000487279 | 0.002803486 |
| 200631_s_at | -0.01913734 | -0.32054123 | 0.749698999 | 0.855759397 |
| 200632_s_at | 0.482767464 | 5.848781893 | 2.35E-07    | 4.89E-06    |
| 200633_at   | -0.02743207 | -0.74363371 | 0.46007109  | 0.638577027 |
| 200634_at   | 0.136533845 | 2.180123122 | 0.033279933 | 0.092496659 |
| 200635_s_at | 0.105786593 | 1.932519766 | 0.058136142 | 0.143406756 |
| 200636_s_at | 0.209579604 | 4.332865805 | 5.85E-05    | 0.000469797 |
| 200637_s_at | -0.03884582 | -0.38407417 | 0.702314416 | 0.824195465 |
| 200638_s_at | -0.66132043 | -4.73143265 | 1.45E-05    | 0.000145549 |
| 200639_s_at | -0.4286613  | -6.79122121 | 6.30E-09    | 3.24E-07    |
| 200640_at   | -0.65091963 | -6.67217894 | 9.98E-09    | 4.48E-07    |
| 200641_s_at | -0.80365142 | -5.26373055 | 2.10E-06    | 2.95E-05    |
| 200642_at   | -0.11390833 | -1.67389625 | 0.099484195 | 0.216790074 |
| 200643_at   | -0.12186536 | -3.50422765 | 0.00088462  | 0.004603565 |
| 200644_at   | 0.135090294 | 1.695446132 | 0.095301578 | 0.209844712 |
| 200645_at   | 0.080623569 | 1.996309659 | 0.050556045 | 0.128574663 |
| 200646_s_at | -0.05380911 | -0.90194939 | 0.370778224 | 0.554022748 |
| 200647_x_at | -0.25399012 | -2.76575    | 0.007584781 | 0.027810243 |
| 200648_s_at | -0.26136915 | -2.13989275 | 0.036540524 | 0.099589529 |
| 200649_at   | 0.129400325 | 2.742445363 | 0.008077187 | 0.029322203 |
| 200650_s_at | -0.51647427 | -5.01651494 | 5.20E-06    | 6.21E-05    |
| 200651_at   | 0.136239836 | 2.532629444 | 0.014021878 | 0.045946606 |
| 200652_at   | -0.10360561 | -2.83590338 | 0.006264336 | 0.023742671 |
| 200653_s_at | -0.20511415 | -3.25693903 | 0.001875546 | 0.008648566 |
| 200654_at   | 0.156343068 | 3.054921622 | 0.003385917 | 0.01423015  |
| 200655_s_at | -0.018051   | -0.37638781 | 0.707988752 | 0.827967924 |
| 200656_s_at | 0.121866505 | 1.505910757 | 0.137464918 | 0.276327176 |
| 200657_at   | -0.25309465 | -2.78582645 | 0.007182877 | 0.026596285 |
| 200658_s_at | -0.04678415 | -0.96789721 | 0.337075858 | 0.519837575 |
| 200659_s_at | 0.111473121 | 3.677169051 | 0.000514008 | 0.002931975 |
| 200660_at   | 0.437721183 | 3.644443484 | 0.00057022  | 0.003201944 |
| 200661_at   | 0.080024237 | 1.836004747 | 0.071434684 | 0.168233066 |
| 200662_s_at | -0.64009551 | -5.02403925 | 5.06E-06    | 6.08E-05    |
| 200663_at   | 0.440948982 | 5.87304166  | 2.14E-07    | 4.56E-06    |
| 200664_s_at | 0.280394766 | 1.448493893 | 0.152811948 | 0.298191136 |
| 200665_s_at | 0.503972819 | 3.816720595 | 0.000328449 | 0.002008077 |
| 200666_s_at | 0.441629819 | 2.36496097  | 0.021364828 | 0.064994683 |
| 200667_at   | 0.136960983 | 2.085527404 | 0.041388294 | 0.109821627 |
| 200668_s_at | 0.038410187 | 0.421027477 | 0.67527612  | 0.804892395 |
| 200669_s_at | -0.1127358  | -1.11643417 | 0.268795905 | 0.444268735 |
| 200670_at   | -0.04394188 | -0.71279915 | 0.478800504 | 0.654289929 |
| 200671_s_at | 0.008364582 | 0.106700878 | 0.915390947 | 0.955008455 |
| 200672_x_at | -0.09981523 | -1.57442516 | 0.120776245 | 0.250765712 |
| 200673_at   | 0.521036078 | 5.341593487 | 1.58E-06    | 2.33E-05    |
| 200674_s_at | -0.02622623 | -0.57417787 | 0.568046252 | 0.727445574 |
| 200675_at   | 0.368938675 | 6.076904054 | 9.86E-08    | 2.50E-06    |
| 200676_s_at | 0.094235882 | 1.812587568 | 0.075021838 | 0.174665347 |
| 200677_at   | 0.625841042 | 6.891356141 | 4.27E-09    | 2.47E-07    |
| 200678_x_at | 0.116896703 | 3.080904759 | 0.003142024 | 0.013354571 |
| 200679_x_at | 0.18084005  | 2.52199201  | 0.014409152 | 0.046977955 |
| 200680_x_at | 0.19823402  | 4.095320334 | 0.000131114 | 0.000927159 |
| 200681_at   | -0.17204859 | -2.91166486 | 0.005078985 | 0.019960667 |
| 200682_s_at | -0.06485103 | -1.50097243 | 0.138735061 | 0.278229631 |
| 200683_s_at | 0.027311049 | 0.591719039 | 0.556316055 | 0.718601033 |
| 200684_s_at | -0.02580321 | -0.47093273 | 0.639438167 | 0.78079207  |
| 200685_at   | 0.07548832  | 1.742670773 | 0.086639908 | 0.195255446 |
| 200686_s_at | 0.197556354 | 3.40920638  | 0.001184982 | 0.005871311 |
| 200687_s_at | 0.034856186 | 1.016949579 | 0.313360217 | 0.494446223 |
| 200688_at   | -0.15175964 | -3.54566191 | 0.0007777   | 0.004139318 |
| 200689_x_at | -0.02924448 | -0.66728457 | 0.507211154 | 0.678528524 |
| 200690_at   | 0.079542883 | 1.864348265 | 0.067286837 | 0.160872061 |
| 200691_s_at | 0.039739696 | 0.653885154 | 0.515745153 | 0.685879974 |
| 200692_s_at | -0.06845276 | -0.94377659 | 0.349161046 | 0.53227577  |
| 200693_at   | -0.04460968 | -0.46626435 | 0.642755944 | 0.78292457  |
| 200694_s_at | -0.21091651 | -3.43602964 | 0.001091605 | 0.005476039 |
| 200695_at   | -0.439106   | -6.22033032 | 5.70E-08    | 1.63E-06    |
| 200696_s_at | 0.428006311 | 4.175515638 | 0.000100096 | 0.000737226 |

|             |             |             |             |             |
|-------------|-------------|-------------|-------------|-------------|
| 200697_at   | -0.12670459 | -2.57535616 | 0.01255951  | 0.042017337 |
| 200698_at   | -0.01845186 | -0.22606184 | 0.821940415 | 0.901016794 |
| 200699_at   | 0.26656355  | 4.454242663 | 3.85E-05    | 0.00033187  |
| 200700_s_at | 0.007761042 | 0.101824858 | 0.919243518 | 0.957418581 |
| 200701_at   | 0.522814118 | 5.924549304 | 1.76E-07    | 3.91E-06    |
| 200702_s_at | -0.01269073 | -0.2190561  | 0.827367974 | 0.904195886 |
| 200703_at   | -0.09072868 | -1.39262588 | 0.168997633 | 0.32109694  |
| 200704_at   | 0.252059689 | 2.421620562 | 0.018567907 | 0.057989999 |
| 200705_s_at | -0.20364988 | -2.6621103  | 0.010008051 | 0.03492746  |
| 200706_s_at | 0.203394999 | 2.50123046  | 0.015192997 | 0.049157376 |
| 200707_at   | 0.111067764 | 1.488635588 | 0.141948631 | 0.282783642 |
| 200708_at   | -0.16849252 | -3.63699987 | 0.000583802 | 0.003265899 |
| 200709_at   | -0.82180866 | -7.1359225  | 1.65E-09    | 1.28E-07    |
| 200710_at   | 0.391997235 | 5.229200236 | 2.39E-06    | 3.27E-05    |
| 200711_s_at | -0.11510885 | -2.34590796 | 0.022386642 | 0.067437572 |
| 200712_s_at | 0.076491741 | 0.928181023 | 0.357123347 | 0.540248337 |
| 200713_s_at | 0.383143575 | 5.609593984 | 5.80E-07    | 1.02E-05    |
| 200714_x_at | 0.061710684 | 2.051986786 | 0.044650069 | 0.116805249 |
| 200715_x_at | 0.043486271 | 0.954791439 | 0.343607647 | 0.526499022 |
| 200716_x_at | 0.013393434 | 0.276304262 | 0.783287108 | 0.876108502 |
| 200717_x_at | -0.11329368 | -2.53821702 | 0.01382225  | 0.045432374 |
| 200718_s_at | -0.05650321 | -0.73711463 | 0.463995482 | 0.641750568 |
| 200719_at   | -0.01008466 | -0.30588908 | 0.760773794 | 0.862278199 |
| 200720_s_at | -0.30226482 | -3.69656784 | 0.00048323  | 0.002782695 |
| 200721_s_at | 0.040404797 | 1.097660368 | 0.276845307 | 0.453430955 |
| 200722_s_at | -0.28068855 | -4.09369322 | 0.000131831 | 0.000931506 |
| 200723_s_at | -0.08693734 | -0.98243141 | 0.329928538 | 0.512429756 |
| 200724_at   | 0.035312437 | 0.866264193 | 0.389880354 | 0.572760923 |
| 200725_x_at | 0.018827473 | 0.288935806 | 0.773650782 | 0.870340089 |
| 200726_at   | 0.118780059 | 2.010496268 | 0.048990735 | 0.125465241 |
| 200727_s_at | -0.29480792 | -3.08974555 | 0.003062854 | 0.013070282 |
| 200728_at   | -0.22008035 | -3.16394448 | 0.002468253 | 0.010876667 |
| 200729_s_at | -0.33239935 | -2.70420805 | 0.008949061 | 0.03187372  |
| 200730_s_at | -0.16980121 | -1.88007659 | 0.065074128 | 0.156722149 |
| 200731_s_at | -0.0704015  | -1.26815135 | 0.209762051 | 0.374328605 |
| 200732_s_at | -0.16743016 | -2.24456149 | 0.028588239 | 0.081948916 |
| 200733_s_at | 0.17204052  | 2.172911497 | 0.033844928 | 0.093757981 |
| 200734_s_at | 0.66310358  | -7.3831759  | 6.31E-10    | 6.82E-08    |
| 200735_x_at | -0.13820444 | -2.25295897 | 0.028021995 | 0.080604942 |
| 200736_s_at | 0.379849869 | 4.078206255 | 0.000138845 | 0.000971243 |
| 200737_at   | -0.38915304 | -4.16927491 | 0.00010223  | 0.000751207 |
| 200738_s_at | -0.38180255 | -4.16052726 | 0.000105294 | 0.000769428 |
| 200739_s_at | -0.40980511 | -6.12832331 | 8.10E-08    | 2.14E-06    |
| 200740_s_at | -0.37007224 | -4.94694439 | 6.69E-06    | 7.67E-05    |
| 200741_s_at | -0.22956702 | -4.84413038 | 9.69E-06    | 0.000104076 |
| 200742_s_at | -0.05173966 | -0.60307645 | 0.548786247 | 0.711981972 |
| 200743_s_at | 0.282839834 | 4.51936234  | 3.07E-05    | 0.000273202 |
| 200744_s_at | -0.5832396  | -4.92944932 | 7.13E-06    | 8.10E-05    |
| 200745_s_at | -0.34582935 | -6.10750638 | 8.78E-08    | 2.28E-06    |
| 200746_s_at | -0.33930091 | -6.50994605 | 1.87E-08    | 7.04E-07    |
| 200747_s_at | 0.273848429 | 7.437828763 | 5.10E-10    | 5.86E-08    |
| 200748_s_at | 0.087474585 | 1.119512822 | 0.267491799 | 0.44275188  |
| 200749_at   | -0.36387722 | -3.68820774 | 0.000496271 | 0.002847522 |
| 200750_s_at | -0.19753027 | -2.16135019 | 0.034768256 | 0.095787381 |
| 200751_s_at | 0.015116136 | 0.15312675  | 0.878824694 | 0.93501563  |
| 200752_s_at | 0.03238422  | 0.97451779  | 0.333807558 | 0.516535998 |
| 200753_x_at | -0.19250042 | -1.92129062 | 0.059566212 | 0.146166648 |
| 200754_x_at | -0.1064657  | -1.35065202 | 0.182002722 | 0.338679505 |
| 200755_s_at | -0.17184461 | -3.17016097 | 0.002423698 | 0.010702492 |
| 200756_x_at | -0.08715695 | -2.73155083 | 0.008317302 | 0.030040154 |
| 200757_s_at | 0.092536318 | 2.192330882 | 0.03234237  | 0.090458826 |
| 200758_s_at | 0.043711226 | 1.249293585 | 0.216527727 | 0.382634829 |
| 200759_x_at | 0.090951121 | 2.889621737 | 0.005400445 | 0.020989364 |
| 200760_s_at | -0.19523929 | -1.84792453 | 0.069664829 | 0.165135278 |
| 200761_s_at | -0.08009316 | -1.2723528  | 0.208276293 | 0.372354174 |
| 200762_at   | 0.272066048 | 4.13871557  | 0.000113329 | 0.000818503 |
| 200763_s_at | 0.075123213 | 1.686002732 | 0.097116326 | 0.212868458 |
| 200764_s_at | 0.067759671 | 0.884300081 | 0.380150225 | 0.562832898 |
| 200765_x_at | 0.129252146 | 1.706331728 | 0.093244344 | 0.20645133  |
| 200766_at   | 0.159299357 | 2.884733441 | 0.005474239 | 0.021226332 |
| 200767_s_at | 0.025621621 | 0.645458474 | 0.521150946 | 0.690030161 |
| 200768_s_at | 0.475117756 | 7.200822355 | 1.28E-09    | 1.11E-07    |
| 200769_s_at | -0.10064519 | -0.85711515 | 0.394875011 | 0.577528355 |
| 200770_s_at | -0.00751703 | -0.21286386 | 0.832172353 | 0.907280602 |
| 200771_at   | 0.216094715 | 2.993902631 | 0.004029868 | 0.016492937 |

|             |             |             |             |             |
|-------------|-------------|-------------|-------------|-------------|
| 200772_x_at | 0.55796055  | 6.662872213 | 1.03E-08    | 4.59E-07    |
| 200773_x_at | 0.283600783 | 6.092341829 | 9.30E-08    | 2.39E-06    |
| 200774_at   | 0.054406362 | 1.08928365  | 0.28049073  | 0.457674531 |
| 200775_s_at | 0.118787403 | 2.295388675 | 0.025309967 | 0.074425811 |
| 200776_s_at | -0.09116787 | -1.20785924 | 0.231956395 | 0.400347385 |
| 200777_s_at | 0.095446891 | 1.593426203 | 0.116447844 | 0.244092072 |
| 200778_s_at | -0.1259714  | -1.12416845 | 0.26552818  | 0.44069316  |
| 200779_at   | 0.255236258 | 3.259220271 | 0.001862849 | 0.008598895 |
| 200780_x_at | 0.117743003 | 2.302376837 | 0.024886365 | 0.073447891 |
| 200781_s_at | 0.014158616 | 0.168075938 | 0.867102614 | 0.928071415 |
| 200782_at   | 0.405234455 | 4.989915691 | 5.73E-06    | 6.72E-05    |
| 200783_s_at | 0.163328591 | 2.894294005 | 0.005330775 | 0.020778212 |
| 200784_s_at | -0.03826525 | -0.95682338 | 0.342589551 | 0.52553688  |
| 200785_s_at | -0.04587688 | -1.1081894  | 0.272310387 | 0.448270501 |
| 200786_at   | -0.33952346 | -4.69625971 | 1.64E-05    | 0.000161707 |
| 200787_s_at | 0.034927918 | 0.488472374 | 0.627039347 | 0.771743447 |
| 200788_s_at | 0.218389791 | 4.443859012 | 3.99E-05    | 0.000341428 |
| 200789_at   | 0.15077352  | 4.200175875 | 9.21E-05    | 0.000686718 |
| 200790_at   | 0.371156041 | 4.409560892 | 4.49E-05    | 0.000376196 |
| 200791_s_at | 0.336034335 | 4.578397276 | 2.49E-05    | 0.000230192 |
| 200792_at   | -0.02575861 | -0.43883102 | 0.662398674 | 0.796207197 |
| 200793_s_at | -0.36518101 | -5.10982688 | 3.70E-06    | 4.71E-05    |
| 200794_x_at | 0.219300685 | 3.175534193 | 0.002385797 | 0.010566447 |
| 200795_at   | 0.098606879 | 1.698443759 | 0.094731379 | 0.20887734  |
| 200796_s_at | -0.03371551 | -0.57695706 | 0.566179674 | 0.726512447 |
| 200797_s_at | 0.473543449 | 4.929871897 | 7.12E-06    | 8.09E-05    |
| 200798_x_at | 0.070400825 | 0.481739872 | 0.63178606  | 0.775282334 |
| 200799_at   | 0.578547712 | 3.34679522  | 0.001432379 | 0.006895297 |
| 200800_s_at | 0.698038659 | 3.259760492 | 0.001859854 | 0.008590389 |
| 200801_x_at | -0.10695529 | -2.1232518  | 0.037968846 | 0.102600136 |
| 200802_at   | -0.17298812 | -2.68790438 | 0.00934638  | 0.033041993 |
| 200803_s_at | -0.08892557 | -1.08212302 | 0.283633334 | 0.461088816 |
| 200804_at   | 0.288083503 | 5.401539723 | 1.26E-06    | 1.93E-05    |
| 200805_at   | 0.045565533 | 1.33560919  | 0.186844559 | 0.344747727 |
| 200806_s_at | 0.012537099 | 0.106170748 | 0.915809708 | 0.95200062  |
| 200807_s_at | 0.221748543 | 2.850600863 | 0.006016089 | 0.022951009 |
| 200808_s_at | 0.106781823 | 2.144149262 | 0.036182808 | 0.098831565 |
| 200809_x_at | 0.112878855 | 1.795937843 | 0.077663101 | 0.179412762 |
| 200810_s_at | -0.15223672 | -0.83087247 | 0.409420209 | 0.591587714 |
| 200811_at   | -0.20867839 | -1.27268218 | 0.208160143 | 0.372213056 |
| 200812_at   | -0.04019118 | -0.68314281 | 0.497210277 | 0.670346669 |
| 200813_s_at | -0.24004629 | -2.59947204 | 0.011796635 | 0.039889174 |
| 200814_at   | 0.080409046 | 2.024822873 | 0.047452502 | 0.122437921 |
| 200815_s_at | -0.11197011 | -1.58278314 | 0.118856657 | 0.247756171 |
| 200816_s_at | -0.27503183 | -3.30805203 | 0.001609727 | 0.007603158 |
| 200817_x_at | 0.030551649 | 0.68495232  | 0.496076011 | 0.669200998 |
| 200818_at   | -0.39260159 | -4.61058845 | 2.23E-05    | 0.000209025 |
| 200819_s_at | 0.071914082 | 2.107227404 | 0.039390036 | 0.105566051 |
| 200820_at   | -0.24753019 | -4.02982114 | 0.00016316  | 0.001109719 |
| 200821_at   | 0.537999023 | 5.418043582 | 1.19E-06    | 1.83E-05    |
| 200822_x_at | -0.31309776 | -5.59251096 | 6.18E-07    | 1.07E-05    |
| 200823_x_at | -0.02278018 | -0.38239745 | 0.703550792 | 0.825169715 |
| 200824_at   | 0.197673329 | 3.763016196 | 0.000390619 | 0.002324572 |
| 200825_s_at | -0.26774074 | -4.59469237 | 2.35E-05    | 0.000218767 |
| 200826_at   | -0.23740487 | -3.98833752 | 0.000187235 | 0.001245966 |
| 200827_at   | 0.23012984  | 4.038134551 | 0.000158709 | 0.001084061 |
| 200828_s_at | -0.07835426 | -1.20646962 | 0.232487379 | 0.400985101 |
| 200829_x_at | 0.127214189 | 2.800115431 | 0.006908875 | 0.025763628 |
| 200830_at   | -0.12595571 | -2.36030232 | 0.021610749 | 0.0655821   |
| 200831_s_at | -0.10495486 | -1.19051859 | 0.238645832 | 0.408360481 |
| 200832_s_at | 0.173832644 | 1.727117797 | 0.089417599 | 0.200002569 |
| 200833_s_at | 0.294827456 | 3.611101942 | 0.000633502 | 0.003495071 |
| 200834_s_at | -0.03311901 | -0.5261626  | 0.600762158 | 0.75224875  |
| 200835_s_at | 0.028076752 | 0.661140111 | 0.51111505  | 0.681893603 |
| 200836_s_at | 0.296696305 | 4.830983464 | 1.02E-05    | 0.000108214 |
| 200837_at   | -0.12813949 | -2.03782656 | 0.046092552 | 0.119758638 |
| 200838_at   | -0.06309484 | -0.9045414  | 0.369414328 | 0.552631469 |
| 200839_s_at | 0.020194041 | 0.257999079 | 0.797312075 | 0.885062782 |
| 200840_at   | 0.086549717 | 1.135347656 | 0.260854739 | 0.4351722   |
| 200841_s_at | -0.04767201 | -1.18967872 | 0.238973334 | 0.408709652 |
| 200842_s_at | 0.130280445 | 2.297946587 | 0.025154177 | 0.074081744 |
| 200843_s_at | -0.04610848 | -1.17354411 | 0.245328196 | 0.416683929 |
| 200844_s_at | 0.461998014 | 4.808745447 | 1.10E-05    | 0.000115488 |
| 200845_s_at | 0.683006862 | 6.687720948 | 9.40E-09    | 4.28E-07    |
| 200846_s_at | -0.25045306 | -5.03949831 | 4.78E-06    | 5.81E-05    |

|             |             |             |             |             |
|-------------|-------------|-------------|-------------|-------------|
| 200847_s_at | 0.098149091 | 1.380933484 | 0.172546403 | 0.325927466 |
| 200848_at   | 0.515300367 | 4.424646352 | 4.26E-05    | 0.000361028 |
| 200849_s_at | 0.670011561 | 7.185352972 | 1.36E-09    | 1.15E-07    |
| 200850_s_at | 0.493679749 | 5.917363385 | 1.81E-07    | 4.00E-06    |
| 200851_s_at | 0.287337587 | 5.943437294 | 1.64E-07    | 3.70E-06    |
| 200852_x_at | -0.14928093 | -3.59173738 | 0.000673275 | 0.003674444 |
| 200853_at   | -0.62763659 | -5.09105522 | 3.96E-06    | 4.98E-05    |
| 200854_at   | -0.01343597 | -0.37777502 | 0.706963421 | 0.827368464 |
| 200855_at   | -0.03070717 | -1.06801369 | 0.289896896 | 0.46810001  |
| 200856_x_at | -0.04874271 | -1.43735521 | 0.155938607 | 0.302506113 |
| 200857_s_at | -0.01059787 | -0.29567716 | 0.768522451 | 0.867402967 |
| 200858_s_at | 0.074375915 | 1.453302107 | 0.15147748  | 0.296324588 |
| 200859_x_at | 0.353851526 | 6.015735511 | 1.25E-07    | 3.00E-06    |
| 200860_s_at | 0.051414762 | 1.406860092 | 0.164753518 | 0.31512301  |
| 200861_at   | -0.01900561 | -0.54916839 | 0.584977756 | 0.740459467 |
| 200862_at   | -0.13288905 | -1.14751466 | 0.255835007 | 0.429244213 |
| 200863_s_at | -0.21070952 | -4.05479506 | 0.000150138 | 0.001034529 |
| 200864_s_at | -0.11121179 | -1.30794361 | 0.196003092 | 0.356668168 |
| 200865_at   | -0.01416305 | -0.654662   | 0.515248305 | 0.685566026 |
| 200866_s_at | -0.09796867 | -0.67832385 | 0.500237878 | 0.672847911 |
| 200867_at   | 0.305243016 | 4.960595464 | 6.37E-06    | 7.36E-05    |
| 200868_s_at | -0.04936637 | -0.91528499 | 0.363795306 | 0.546971903 |
| 200869_at   | 0.0547968   | 0.787881314 | 0.433943445 | 0.614661525 |
| 200870_at   | -0.16332176 | -2.89256677 | 0.005356433 | 0.020854577 |
| 200871_s_at | 0.10110676  | 1.901966834 | 0.062097248 | 0.151132724 |
| 200872_at   | 0.258568559 | 2.200024964 | 0.031763456 | 0.089156414 |
| 200873_s_at | -0.13005685 | -1.64299748 | 0.105742257 | 0.227072503 |
| 200874_s_at | -0.06005761 | -1.33797184 | 0.186077696 | 0.343816729 |
| 200875_s_at | 0.090168092 | 1.570420523 | 0.121704773 | 0.252201498 |
| 200876_s_at | -0.0661179  | -0.72272408 | 0.472725728 | 0.648873305 |
| 200877_at   | -0.08249935 | -1.1376188  | 0.259912466 | 0.433951283 |
| 200878_at   | 0.196033788 | 2.556811228 | 0.013176331 | 0.043675488 |
| 200879_s_at | -0.18015189 | -2.33384956 | 0.023055642 | 0.069098896 |
| 200880_at   | -0.08822059 | -0.90608489 | 0.368603677 | 0.551825127 |
| 200881_s_at | -0.00079    | -0.00637166 | 0.994937841 | 0.997603667 |
| 200882_s_at | -0.03386152 | -0.72187135 | 0.473245947 | 0.649268732 |
| 200883_at   | -0.58172319 | -5.16756576 | 2.99E-06    | 3.95E-05    |
| 200884_at   | -0.12166862 | -2.14289016 | 0.036288302 | 0.099089436 |
| 200885_at   | 0.413261939 | 6.057581285 | 1.06E-07    | 2.64E-06    |
| 200886_s_at | -0.20518414 | -3.98933517 | 0.000186618 | 0.001242784 |
| 200887_s_at | -0.02919456 | -0.20357432 | 0.839391855 | 0.911421302 |
| 200888_s_at | 0.12151264  | 2.057694594 | 0.044079762 | 0.115571015 |
| 200889_s_at | 0.01743657  | 0.237022486 | 0.813466475 | 0.895299916 |
| 200890_s_at | 0.109700778 | 1.705304632 | 0.093436877 | 0.206767721 |
| 200891_s_at | 0.354757866 | 5.439108997 | 1.10E-06    | 1.72E-05    |
| 200892_s_at | -0.07339534 | -0.86360894 | 0.391325841 | 0.574129554 |
| 200893_at   | 0.130307266 | 2.349923787 | 0.022167718 | 0.06694426  |
| 200894_s_at | -0.02015592 | -0.20724031 | 0.836541082 | 0.909883046 |
| 200895_s_at | 0.089493081 | 1.193265387 | 0.237576999 | 0.40699905  |
| 200896_x_at | 0.122074052 | 3.042094308 | 0.003512737 | 0.014676079 |
| 200897_s_at | 0.734435191 | 5.817614521 | 2.65E-07    | 5.40E-06    |
| 200898_s_at | -0.21636206 | -2.67669317 | 0.009628893 | 0.03384197  |
| 200899_s_at | -0.16316993 | -2.3719923  | 0.020998391 | 0.064063081 |
| 200900_s_at | -0.18385945 | -2.93212159 | 0.00479662  | 0.019063631 |
| 200901_s_at | -0.07678232 | -2.0341541  | 0.046473172 | 0.120466237 |
| 200902_at   | 0.071670639 | 0.791218616 | 0.432009114 | 0.612853965 |
| 200903_s_at | -0.17129155 | -2.86727243 | 0.00574552  | 0.02210371  |
| 200904_at   | 0.457512007 | 4.690804022 | 1.68E-05    | 0.000164332 |
| 200905_x_at | 0.283617916 | 3.294520444 | 0.001676412 | 0.007864195 |
| 200906_s_at | 0.310810558 | 3.72768344  | 0.000437512 | 0.002556987 |
| 200907_s_at | 0.736769486 | 5.567124631 | 6.80E-07    | 1.16E-05    |
| 200908_s_at | 0.044597166 | 1.156344474 | 0.252235464 | 0.425168114 |
| 200909_s_at | 0.101644812 | 1.958319251 | 0.054960979 | 0.137408596 |
| 200910_at   | 0.092290763 | 1.142838693 | 0.257755963 | 0.43149528  |
| 200911_s_at | 0.11735982  | 3.416351946 | 0.001159393 | 0.005763052 |
| 200912_s_at | -0.34461939 | -6.32065743 | 3.88E-08    | 1.21E-06    |
| 200913_at   | -0.00074169 | -0.02503523 | 0.980111973 | 0.990022688 |
| 200914_x_at | 0.487521331 | 5.287965494 | 1.92E-06    | 2.74E-05    |
| 200915_x_at | 0.278930929 | 4.271406459 | 7.23E-05    | 0.000560963 |
| 200916_at   | 0.489450848 | 5.068051517 | 4.31E-06    | 5.33E-05    |
| 200917_s_at | -0.21294665 | -3.62388542 | 0.000608485 | 0.003376511 |
| 200918_s_at | -0.13475751 | -2.64934663 | 0.01035105  | 0.035850056 |
| 200919_at   | 0.083899675 | 1.983175687 | 0.052043335 | 0.131595996 |
| 200920_s_at | 0.286054624 | 3.935719785 | 0.000222729 | 0.001446315 |
| 200921_s_at | 0.402076943 | 3.744758061 | 0.000414215 | 0.002442549 |

|             |             |             |             |             |
|-------------|-------------|-------------|-------------|-------------|
| 200922_at   | -0.07391202 | -1.7256792  | 0.089678202 | 0.200452184 |
| 200923_at   | 0.352054577 | 4.33451422  | 5.82E-05    | 0.000467647 |
| 200924_s_at | 0.263740266 | 4.619018634 | 2.16E-05    | 0.000203931 |
| 200925_at   | -0.29606692 | -6.83198814 | 5.38E-09    | 2.92E-07    |
| 200926_at   | 0.083107514 | 1.715802292 | 0.091484396 | 0.203484826 |
| 200927_s_at | -0.20829979 | -2.09561754 | 0.040448436 | 0.107833542 |
| 200928_s_at | -0.04250443 | -1.43708583 | 0.156014834 | 0.302604589 |
| 200929_at   | 0.198934254 | 2.244503544 | 0.028592181 | 0.08195496  |
| 200930_s_at | 0.034007825 | 1.317943188 | 0.192654592 | 0.352238546 |
| 200931_s_at | 0.046682914 | 0.847377812 | 0.400234216 | 0.582685112 |
| 200932_s_at | -0.13791537 | -3.54940354 | 0.000768676 | 0.004100459 |
| 200933_x_at | 0.0050439   | 0.152549391 | 0.879277982 | 0.935213355 |
| 200934_at   | 0.298578179 | 3.499941413 | 0.000896445 | 0.004654807 |
| 200935_at   | -0.04783144 | -0.66535634 | 0.508434526 | 0.679636173 |
| 200936_at   | 0.146301585 | 2.244958273 | 0.028561257 | 0.081892584 |
| 200937_s_at | 0.044139388 | 0.67209892  | 0.504163605 | 0.676148619 |
| 200938_s_at | -0.01050196 | -0.25152463 | 0.802289011 | 0.888511968 |
| 200939_s_at | -0.05483403 | -2.02346328 | 0.04759667  | 0.122717802 |
| 200940_s_at | 0.087904936 | 1.975901142 | 0.052883145 | 0.133219859 |
| 200941_at   | 0.146731157 | 2.807220751 | 0.00677624  | 0.025348933 |
| 200942_s_at | 0.085393916 | 1.283154825 | 0.204492324 | 0.367589444 |
| 200943_at   | 0.116040234 | 1.420682184 | 0.160711526 | 0.309324699 |
| 200944_s_at | 0.243628883 | 3.798332133 | 0.000348583 | 0.002109813 |
| 200945_s_at | 0.057262193 | 0.973569814 | 0.334274244 | 0.517107158 |
| 200946_x_at | -0.07911814 | -1.01514038 | 0.314214418 | 0.495320962 |
| 200947_s_at | 0.134817294 | 1.950056527 | 0.055961344 | 0.139323817 |
| 200948_at   | -0.34944576 | -7.5266744  | 3.61E-10    | 4.75E-08    |
| 200949_x_at | 0.0006882   | 0.015419348 | 0.987750036 | 0.994153766 |
| 200950_at   | -0.24894814 | -3.51008104 | 0.00086871  | 0.004530954 |
| 200951_s_at | -0.03583919 | -0.88072309 | 0.382067699 | 0.564848482 |
| 200952_s_at | -0.02054522 | -0.45418792 | 0.651372389 | 0.788682497 |
| 200953_s_at | -0.18135643 | -2.27537184 | 0.026558961 | 0.077299579 |
| 200954_at   | -0.40701607 | -5.78275564 | 3.02E-07    | 6.01E-06    |
| 200955_at   | -0.21243947 | -3.24308552 | 0.00195442  | 0.008936664 |
| 200956_s_at | 0.111432477 | 2.412162568 | 0.019010651 | 0.059157778 |
| 200957_s_at | 0.152569702 | 4.28113819  | 6.99E-05    | 0.000544463 |
| 200958_s_at | -0.30469998 | -5.85336536 | 2.31E-07    | 4.83E-06    |
| 200959_at   | -0.02220302 | -0.46547896 | 0.643314831 | 0.783345301 |
| 200960_x_at | -0.05325797 | -1.73183001 | 0.088568355 | 0.198540247 |
| 200961_at   | -0.19711656 | -3.21388939 | 0.002130985 | 0.009614172 |
| 200962_at   | -0.35509927 | -4.55902815 | 2.67E-05    | 0.000243379 |
| 200963_x_at | -0.31723919 | -5.70468082 | 4.05E-07    | 7.65E-06    |
| 200964_at   | 0.11867124  | 1.806565528 | 0.07596834  | 0.176330295 |
| 200965_s_at | 0.357230464 | 4.645274784 | 1.97E-05    | 0.000188659 |
| 200966_x_at | -0.27069468 | -3.99862446 | 0.000180964 | 0.001211996 |
| 200967_at   | 0.372445008 | 4.753549653 | 1.34E-05    | 0.000136139 |
| 200968_s_at | 0.333021555 | 4.188790763 | 9.57E-05    | 0.000709642 |
| 200969_at   | 0.121338471 | 1.318169474 | 0.192579319 | 0.352179024 |
| 200970_s_at | 0.07160827  | 1.099023558 | 0.276255215 | 0.452646945 |
| 200971_s_at | 0.118578064 | 1.542177762 | 0.1284168   | 0.262735928 |
| 200972_at   | 0.166803537 | 2.47981414  | 0.016041721 | 0.051415418 |
| 200973_s_at | -0.00341232 | -0.03644968 | 0.971047757 | 0.985267245 |
| 200974_at   | 0.277744312 | 2.191652705 | 0.032393839 | 0.090569    |
| 200975_at   | -0.07400547 | -1.68906513 | 0.096524741 | 0.211902925 |
| 200976_s_at | 0.05659212  | 1.163043763 | 0.249528711 | 0.421974313 |
| 200977_s_at | 0.081544542 | 0.967523705 | 0.337260869 | 0.520040807 |
| 200978_at   | -0.8746111  | -6.82984239 | 5.42E-09    | 2.93E-07    |
| 200979_at   | -0.29776986 | -4.55164545 | 2.74E-05    | 0.000248703 |
| 200980_s_at | -0.19313844 | -3.29383657 | 0.00167985  | 0.007877018 |
| 200981_x_at | 0.109419603 | 1.996483915 | 0.05053656  | 0.128540206 |
| 200982_s_at | -0.43825529 | -6.30927787 | 4.05E-08    | 1.26E-06    |
| 200983_x_at | -0.1463785  | -1.39680883 | 0.167741791 | 0.319416963 |
| 200984_s_at | -0.06129129 | -0.6795987  | 0.499435956 | 0.672191524 |
| 200985_s_at | 0.104307307 | 1.373401032 | 0.174862686 | 0.329064748 |
| 200986_at   | 0.748751931 | 5.148807828 | 3.21E-06    | 4.18E-05    |
| 200987_x_at | -0.23181024 | -4.81801157 | 1.06E-05    | 0.000112376 |
| 200988_s_at | -0.04586242 | -0.87650738 | 0.384335365 | 0.566963168 |
| 200989_at   | 0.197438033 | 2.14208449  | 0.036355947 | 0.099201415 |
| 200990_at   | 0.162426246 | 3.25150641  | 0.001906112 | 0.008760589 |
| 200991_s_at | -0.02339874 | -0.57784757 | 0.565582224 | 0.725975092 |
| 200992_at   | 0.012424279 | 0.195911184 | 0.845357855 | 0.915120098 |
| 200993_at   | -0.06063951 | -1.08252878 | 0.283454606 | 0.460928781 |
| 200994_at   | 0.002320736 | 0.047675011 | 0.962137455 | 0.980768815 |
| 200995_at   | 0.141199512 | 2.411625711 | 0.019036064 | 0.05922861  |
| 200996_at   | -0.30714592 | -2.91536301 | 0.005026825 | 0.0198042   |

|             |             |             |             |             |
|-------------|-------------|-------------|-------------|-------------|
| 200997_at   | 0.134745198 | 2.248054146 | 0.028351511 | 0.081400858 |
| 200998_s_at | 0.270757984 | 4.59564948  | 2.35E-05    | 0.000218258 |
| 200999_s_at | 0.531650025 | 7.430090367 | 5.26E-10    | 5.98E-08    |
| 201000_at   | -0.06792072 | -1.45423263 | 0.151220278 | 0.296015796 |
| 201001_s_at | -0.35523593 | -4.21110633 | 8.87E-05    | 0.000665785 |
| 201002_s_at | -0.22663041 | -4.06262265 | 0.000146267 | 0.001013562 |
| 201003_x_at | 0.150090923 | 2.996004218 | 0.004005912 | 0.016416866 |
| 201004_at   | 0.087889804 | 1.638450579 | 0.106689639 | 0.22849211  |
| 201005_at   | 0.125894003 | 0.757088514 | 0.452032022 | 0.631378414 |
| 201006_at   | 0.002911516 | 0.08122747  | 0.935538007 | 0.966542022 |
| 201007_at   | 0.203131124 | 3.471059357 | 0.000980135 | 0.005013069 |
| 201008_s_at | 0.675015156 | 4.39642983  | 4.70E-05    | 0.000390754 |
| 201009_s_at | 0.895812323 | 6.325000363 | 3.81E-08    | 1.20E-06    |
| 201010_s_at | 0.887856745 | 6.425502971 | 2.59E-08    | 8.91E-07    |
| 201011_at   | 0.164577028 | 2.327950306 | 0.023389374 | 0.069944323 |
| 201012_at   | 0.850195308 | 3.359870565 | 0.001376814 | 0.006663698 |
| 201013_s_at | 0.404736253 | 5.193573244 | 2.72E-06    | 3.65E-05    |
| 201014_s_at | 0.213613151 | 2.579375063 | 0.012429344 | 0.04164734  |
| 201015_s_at | 0.33634658  | 6.16394467  | 7.07E-08    | 1.93E-06    |
| 201016_at   | -0.02314099 | -0.31351786 | 0.755001157 | 0.859178359 |
| 201017_at   | -0.04263065 | -0.57296504 | 0.568861762 | 0.727958346 |
| 201018_at   | -0.28586202 | -4.34081707 | 5.70E-05    | 0.000459605 |
| 201019_s_at | 0.152290273 | 2.269866731 | 0.026911904 | 0.078054826 |
| 201020_at   | -0.8330841  | -6.39098767 | 2.96E-08    | 9.85E-07    |
| 201021_s_at | -0.39036302 | -3.2543002  | 0.001890335 | 0.008699977 |
| 201022_s_at | -0.19525292 | -2.97689154 | 0.004228746 | 0.017177888 |
| 201023_at   | 0.039347598 | 0.525306194 | 0.601353538 | 0.75269401  |
| 201024_x_at | 0.291158102 | 4.5997711   | 2.31E-05    | 0.000215562 |
| 201025_at   | 0.12046283  | 3.014456397 | 0.003801195 | 0.015709545 |
| 201026_at   | 0.035702572 | 1.253076311 | 0.21515782  | 0.380991057 |
| 201027_s_at | 0.197030579 | 3.18678911  | 0.002308203 | 0.010279842 |
| 201028_s_at | 0.725548844 | 4.764315593 | 1.29E-05    | 0.000131815 |
| 201029_s_at | 0.784332204 | 5.980508908 | 1.42E-07    | 3.32E-06    |
| 201030_x_at | -0.05543176 | -0.98886589 | 0.326796704 | 0.5089667   |
| 201031_s_at | 0.265671921 | 3.32892899  | 0.001511736 | 0.007207437 |
| 201032_at   | -0.50563205 | -5.48387297 | 9.28E-07    | 1.51E-05    |
| 201033_x_at | 0.141823113 | 2.448398974 | 0.017364131 | 0.054917398 |
| 201034_at   | 0.415268256 | 5.623288847 | 5.51E-07    | 9.79E-06    |
| 201035_s_at | 0.019801105 | 0.471894445 | 0.638755603 | 0.780342383 |
| 201036_s_at | 0.206669551 | 2.919012823 | 0.004975833 | 0.019643134 |
| 201037_at   | 0.167459065 | 1.55057537  | 0.126390916 | 0.259722444 |
| 201038_s_at | -0.03687019 | -0.52465798 | 0.601801329 | 0.752932223 |
| 201039_s_at | -0.20226691 | -2.9345354  | 0.00476428  | 0.018953467 |
| 201040_at   | 0.104326013 | 2.743163318 | 0.008061589 | 0.029277469 |
| 201041_s_at | 0.445297135 | 2.765965135 | 0.007580367 | 0.0278009   |
| 201042_at   | 0.246620336 | 2.322214136 | 0.023717998 | 0.070751886 |
| 201043_s_at | 0.061052197 | 0.890312115 | 0.376941118 | 0.559657567 |
| 201044_x_at | 0.099753295 | 1.144126053 | 0.257226076 | 0.43096227  |
| 201045_s_at | -0.05419667 | -1.09611358 | 0.27751594  | 0.454163184 |
| 201046_s_at | -0.02237087 | -0.57760989 | 0.565741649 | 0.726138018 |
| 201047_x_at | -0.36396597 | -5.43719975 | 1.10E-06    | 1.73E-05    |
| 201048_x_at | -0.39762791 | -4.69003924 | 1.68E-05    | 0.000164629 |
| 201049_s_at | -0.06343717 | -1.33560765 | 0.18684506  | 0.344747727 |
| 201050_at   | -0.57155536 | -5.32679843 | 1.66E-06    | 2.44E-05    |
| 201051_at   | 0.008147696 | 0.118670766 | 0.905942299 | 0.950184941 |
| 201052_s_at | -0.20511255 | -4.92660079 | 7.20E-06    | 8.17E-05    |
| 201053_s_at | 0.41454901  | 4.632821194 | 2.06E-05    | 0.000195846 |
| 201054_at   | -0.31585709 | -3.24923338 | 0.00191904  | 0.008804563 |
| 201055_s_at | -0.01659464 | -0.36487607 | 0.71651823  | 0.833944445 |
| 201056_at   | 0.124361732 | 2.796114662 | 0.006984606 | 0.025997835 |
| 201057_s_at | 0.136996184 | 2.581677293 | 0.012355331 | 0.041430406 |
| 201058_s_at | 0.242443079 | 2.83328272  | 0.006309581 | 0.02388715  |
| 201059_at   | 0.254425251 | 5.356648813 | 1.49E-06    | 2.22E-05    |
| 201060_x_at | 0.130302293 | 1.150285203 | 0.254701653 | 0.427940904 |
| 201061_s_at | 0.429570772 | 3.88441906  | 0.000263519 | 0.001665324 |
| 201062_at   | 0.029357485 | 1.493173836 | 0.140759729 | 0.281066653 |
| 201063_at   | -0.34066821 | -3.75958413 | 0.000394954 | 0.002345683 |
| 201064_s_at | 0.003476935 | 0.060863644 | 0.951675028 | 0.975197561 |
| 201065_s_at | 0.211566229 | 3.492253535 | 0.000918033 | 0.004745401 |
| 201066_at   | -0.21729743 | -3.22407481 | 0.00206775  | 0.009371453 |
| 201067_at   | -0.128034   | -2.35298923 | 0.022001891 | 0.0665657   |
| 201068_s_at | -0.20234692 | -2.51092154 | 0.014822441 | 0.048097331 |
| 201069_at   | 0.187304126 | 4.433516964 | 4.14E-05    | 0.00035142  |
| 201070_x_at | 0.17604102  | 3.179448665 | 0.002358536 | 0.010468536 |
| 201071_x_at | 0.17034633  | 3.521401525 | 0.000838709 | 0.004401029 |



|             |             |             |             |             |
|-------------|-------------|-------------|-------------|-------------|
| 201072_s_at | 0.057051664 | 1.355542163 | 0.180449469 | 0.336700386 |
| 201073_s_at | 0.132322608 | 3.01024827  | 0.003847005 | 0.015870983 |
| 201074_at   | 0.311957123 | 6.926781889 | 3.72E-09    | 2.25E-07    |
| 201075_s_at | 0.239488874 | 4.019067141 | 0.000169098 | 0.00114297  |
| 201076_at   | -0.12132323 | -2.58234711 | 0.012333873 | 0.041377079 |
| 201077_s_at | -0.25378174 | -4.31553574 | 6.21E-05    | 0.000493373 |
| 201078_at   | -0.30370578 | -3.15251972 | 0.002552147 | 0.011194481 |
| 201079_at   | 0.163172678 | 2.452147015 | 0.017201365 | 0.05448667  |
| 201080_at   | -0.21978224 | -4.22248687 | 8.54E-05    | 0.000644877 |
| 201081_s_at | -0.20597213 | -4.48624728 | 3.44E-05    | 0.000301614 |
| 201082_s_at | -0.40005923 | -4.22036739 | 8.60E-05    | 0.000648441 |
| 201083_s_at | 0.134885858 | 2.260384438 | 0.027529578 | 0.079439044 |
| 201084_s_at | 0.001799268 | 0.027628874 | 0.978052084 | 0.988817009 |
| 201085_s_at | 0.359634432 | 5.206191736 | 2.60E-06    | 3.52E-05    |
| 201086_x_at | 0.081942899 | 1.473331413 | 0.146016319 | 0.288533463 |
| 201087_at   | 0.286745255 | 5.863777348 | 2.22E-07    | 4.68E-06    |
| 201088_at   | 0.09206768  | 1.087909729 | 0.281091818 | 0.458303438 |
| 201089_at   | -0.50233427 | -4.532777   | 2.93E-05    | 0.000262715 |
| 201090_x_at | -0.05346795 | -0.712931   | 0.478719513 | 0.65421926  |
| 201091_s_at | -0.06727935 | -0.94455334 | 0.348767522 | 0.531838341 |
| 201092_at   | -0.2683056  | -4.0216013  | 0.00016768  | 0.001134761 |
| 201093_x_at | -0.02779586 | -0.73223093 | 0.466947892 | 0.644303228 |
| 201094_at   | -0.05964152 | -1.05836473 | 0.294234979 | 0.472866687 |
| 201095_at   | 0.048641203 | 1.107002264 | 0.27281907  | 0.448865715 |
| 201096_s_at | -0.45057194 | -3.54743397 | 0.000773414 | 0.004119833 |
| 201097_s_at | -0.21213368 | -2.50433775 | 0.015073282 | 0.048812053 |
| 201098_at   | 0.045040459 | 1.10504454  | 0.273659403 | 0.449845006 |
| 201099_at   | -0.11343826 | -1.58846886 | 0.117564885 | 0.24591453  |
| 201100_s_at | -0.01406185 | -0.46475592 | 0.643829536 | 0.783624517 |
| 201101_s_at | -0.03388943 | -0.46968054 | 0.640327366 | 0.781367515 |
| 201102_s_at | 0.043083505 | 1.066349503 | 0.290641932 | 0.46899077  |
| 201103_x_at | 0.218563111 | 4.041866809 | 0.000156749 | 0.001072639 |
| 201104_x_at | 0.127540793 | 2.800519535 | 0.006901268 | 0.025741234 |
| 201105_at   | 0.654957522 | 6.80248673  | 6.03E-09    | 3.15E-07    |
| 201106_at   | -0.24330512 | -3.91770738 | 0.000236305 | 0.001520655 |
| 201107_s_at | -0.00301156 | -0.07866314 | 0.937568719 | 0.967447878 |
| 201108_s_at | 0.013726989 | 0.288621645 | 0.773890022 | 0.87054349  |
| 201109_s_at | 0.04398644  | 1.493351423 | 0.140713366 | 0.28098663  |
| 201110_s_at | 0.048319064 | 1.204108289 | 0.23339169  | 0.402065102 |
| 201111_at   | 0.082949536 | 1.110310394 | 0.271403207 | 0.447323149 |
| 201112_s_at | -0.07431069 | -1.06832633 | 0.289757082 | 0.467981389 |
| 201113_at   | 0.066338391 | 1.364523481 | 0.177623073 | 0.33286529  |
| 201114_x_at | 0.00768596  | 0.143254291 | 0.886581104 | 0.939234631 |
| 201115_at   | 0.044233089 | 1.001567815 | 0.32067267  | 0.502454264 |
| 201116_s_at | -0.13974565 | -1.49627026 | 0.139953064 | 0.279993838 |
| 201117_s_at | 0.183558335 | 2.423151264 | 0.018497129 | 0.05781339  |
| 201118_at   | -0.06110798 | -1.14490619 | 0.256905343 | 0.430587421 |
| 201119_s_at | -0.13700781 | -2.98429762 | 0.004141064 | 0.016876933 |
| 201120_s_at | -0.59273052 | -4.42120208 | 4.32E-05    | 0.000364045 |
| 201121_s_at | -0.28279899 | -3.75465336 | 0.000401262 | 0.002378093 |
| 201122_x_at | -0.05014476 | -0.77401124 | 0.442037494 | 0.622358935 |
| 201123_s_at | -0.34321257 | -1.34204141 | 0.184762405 | 0.342162244 |
| 201124_at   | 0.262171032 | 6.068629039 | 1.02E-07    | 2.55E-06    |
| 201125_s_at | 0.32732522  | 6.573796679 | 1.46E-08    | 5.92E-07    |
| 201126_s_at | 0.157893753 | 4.282364877 | 6.96E-05    | 0.000542607 |
| 201127_s_at | -0.14537611 | -3.47021798 | 0.000982681 | 0.005024254 |
| 201128_s_at | -0.08077511 | -1.05909727 | 0.293904079 | 0.472501117 |
| 201129_at   | -0.06822744 | -0.74184861 | 0.461143795 | 0.639422906 |
| 201130_s_at | 0.018598455 | 0.743287445 | 0.460279055 | 0.638765108 |
| 201131_s_at | 0.063357622 | 0.91254834  | 0.365221377 | 0.548525517 |
| 201132_at   | -0.04221406 | -0.44800638 | 0.655801523 | 0.791602476 |
| 201133_s_at | -0.34701774 | -4.94120392 | 6.83E-06    | 7.81E-05    |
| 201134_x_at | -0.24224709 | -5.01244284 | 5.28E-06    | 6.29E-05    |
| 201135_at   | 0.070002967 | 1.530152532 | 0.131362815 | 0.267325685 |
| 201136_at   | 0.335076897 | 4.489095391 | 3.41E-05    | 0.000298958 |
| 201137_s_at | 0.38684133  | 3.128914235 | 0.002734028 | 0.011879176 |
| 201138_s_at | -0.0145811  | -0.25440974 | 0.800070182 | 0.88693381  |
| 201139_s_at | -0.03403146 | -0.64876651 | 0.519025251 | 0.688432564 |
| 201140_s_at | -0.09870296 | -1.72964212 | 0.088961827 | 0.199192484 |
| 201141_at   | -0.0281469  | -0.19775565 | 0.843921031 | 0.914273355 |
| 201142_at   | -0.13346791 | -2.32461576 | 0.023579912 | 0.070424582 |
| 201143_s_at | -0.00934171 | -0.16851214 | 0.866761011 | 0.927869789 |
| 201144_s_at | -0.01458349 | -0.39864329 | 0.691605784 | 0.816767243 |
| 201145_at   | -0.20748225 | -5.0229728  | 5.08E-06    | 6.10E-05    |
| 201146_at   | 0.358761468 | 4.108846864 | 0.000125299 | 0.000893121 |

|             |             |             |             |             |
|-------------|-------------|-------------|-------------|-------------|
| 201147_s_at | 0.137407915 | 1.582507746 | 0.118919513 | 0.24784326  |
| 201148_s_at | 0.066918554 | 1.608444228 | 0.113115948 | 0.238776589 |
| 201149_s_at | -0.01270452 | -0.22320778 | 0.824150501 | 0.902337788 |
| 201150_s_at | 0.288336552 | 3.330898497 | 0.001502789 | 0.007175494 |
| 201151_s_at | -0.09907549 | -0.99355046 | 0.324529101 | 0.506720281 |
| 201152_s_at | 0.098557845 | 1.954301343 | 0.055445499 | 0.138349073 |
| 201153_s_at | 0.139466268 | 1.913262702 | 0.060606851 | 0.148192377 |
| 201154_x_at | -0.27752978 | -6.65656832 | 1.06E-08    | 4.67E-07    |
| 201155_s_at | -0.01887881 | -0.47710424 | 0.635063479 | 0.777446183 |
| 201156_s_at | -0.20282627 | -3.28685202 | 0.00171535  | 0.008016567 |
| 201157_s_at | 0.450309548 | 4.732852323 | 1.44E-05    | 0.000144978 |
| 201158_at   | 0.101339555 | 1.977994229 | 0.052640326 | 0.1327878   |
| 201159_s_at | -0.040771   | -0.96070746 | 0.340648955 | 0.523549059 |
| 201160_s_at | 0.68483477  | 3.449978724 | 0.001045848 | 0.005291037 |
| 201161_s_at | 0.315099954 | 2.348969333 | 0.022219577 | 0.067060867 |
| 201162_at   | 0.236235575 | 2.101316929 | 0.039925806 | 0.106705486 |
| 201163_s_at | 0.487598752 | 3.361485986 | 0.001370093 | 0.006634378 |
| 201164_s_at | 0.062975701 | 1.450556925 | 0.152238256 | 0.297318308 |
| 201165_s_at | 0.004961833 | 0.115096895 | 0.908762032 | 0.951712239 |
| 201166_s_at | 0.076199566 | 1.81910688  | 0.074008334 | 0.172882106 |
| 201167_x_at | -0.60211265 | -5.35648613 | 1.49E-06    | 2.22E-05    |
| 201168_x_at | -0.23529994 | -4.87168617 | 8.78E-06    | 9.58E-05    |
| 201169_s_at | -0.06384298 | -0.77703337 | 0.44026638  | 0.620784485 |
| 201170_s_at | -0.00777261 | -0.0691833  | 0.945079393 | 0.971646842 |
| 201171_at   | 0.009959138 | 0.448378515 | 0.655534533 | 0.791408448 |
| 201172_x_at | 0.262471113 | 4.396988464 | 4.69E-05    | 0.000390072 |
| 201173_x_at | 0.067449677 | 1.565431126 | 0.122869632 | 0.254061842 |
| 201174_s_at | -0.25686681 | -3.87844246 | 0.000268713 | 0.001692648 |
| 201175_at   | -0.00969788 | -0.16933333 | 0.866117986 | 0.927657885 |
| 201176_s_at | -0.04510848 | -0.79901935 | 0.427507773 | 0.608709615 |
| 201177_s_at | -0.07266605 | -1.24815323 | 0.216941965 | 0.383113954 |
| 201178_at   | 0.123588326 | 2.200005425 | 0.031764915 | 0.089156414 |
| 201179_s_at | 0.145791743 | 2.511943882 | 0.01478383  | 0.04800341  |
| 201180_s_at | 0.52512775  | 6.226097646 | 5.57E-08    | 1.60E-06    |
| 201181_at   | 0.09499114  | 2.450815337 | 0.017259038 | 0.054639152 |
| 201182_s_at | -0.02237099 | -0.53979921 | 0.591382132 | 0.745251769 |
| 201183_s_at | 0.059543295 | 1.509880275 | 0.136450637 | 0.274740346 |
| 201184_s_at | 0.093988871 | 2.300482606 | 0.025000561 | 0.073736228 |
| 201185_at   | 0.071873647 | 1.227924581 | 0.224387534 | 0.391494068 |
| 201186_at   | -0.77449658 | -9.1514658  | 6.84E-13    | 2.18E-09    |
| 201187_s_at | 0.050908383 | 1.164678688 | 0.248871315 | 0.421254316 |
| 201188_s_at | 0.086283192 | 2.160721154 | 0.03481912  | 0.095871983 |
| 201189_s_at | 0.163379309 | 2.892627581 | 0.005355527 | 0.020852869 |
| 201190_s_at | -0.05149281 | -1.31328502 | 0.19420904  | 0.354196712 |
| 201191_at   | -0.04617524 | -0.99466746 | 0.323989962 | 0.506002216 |
| 201192_s_at | -0.12947812 | -1.37754168 | 0.173586478 | 0.327311066 |
| 201193_at   | 0.19908595  | 3.207274402 | 0.002173023 | 0.009774228 |
| 201194_at   | -0.0250181  | -0.46070886 | 0.646713715 | 0.785704599 |
| 201195_s_at | 0.570268095 | 6.217564689 | 5.76E-08    | 1.65E-06    |
| 201196_s_at | -0.10467736 | -1.15027963 | 0.25470393  | 0.427940904 |
| 201197_at   | 0.157501669 | 2.02346768  | 0.047596202 | 0.122717802 |
| 201198_s_at | -0.22504687 | -3.59586835 | 0.000664596 | 0.003635955 |
| 201199_s_at | -0.19740297 | -3.78982723 | 0.00035829  | 0.002159794 |
| 201200_at   | -0.18645096 | -2.30464307 | 0.024750351 | 0.073128202 |
| 201201_at   | 0.111924659 | 1.959785867 | 0.054785024 | 0.137077587 |
| 201202_at   | 0.092165432 | 1.256530887 | 0.213912359 | 0.379447157 |
| 201203_s_at | 0.002843091 | 0.076206424 | 0.939514604 | 0.968353744 |
| 201204_s_at | 0.415253491 | 6.098839562 | 9.07E-08    | 2.34E-06    |
| 201205_at   | 0.001143959 | 0.02138211  | 0.983013528 | 0.991722691 |
| 201206_s_at | 0.159797711 | 3.41331848  | 0.001170192 | 0.005809621 |
| 201207_at   | 0.056265958 | 1.651105821 | 0.104069814 | 0.224430039 |
| 201208_s_at | -0.05202158 | -1.56633392 | 0.122658199 | 0.25380114  |
| 201209_at   | 0.528323221 | 6.975157095 | 3.08E-09    | 1.96E-07    |
| 201210_at   | 0.30655896  | 3.571546562 | 0.000717275 | 0.003873425 |
| 201211_s_at | -0.03424318 | -0.40307373 | 0.688361696 | 0.814339258 |
| 201212_at   | -0.06490828 | -1.24687342 | 0.217407554 | 0.383637163 |
| 201213_at   | -0.21721494 | -5.47596218 | 9.56E-07    | 1.54E-05    |
| 201214_s_at | -0.67022969 | -6.24772894 | 5.13E-08    | 1.50E-06    |
| 201215_at   | 0.463869359 | 3.923203568 | 0.00023208  | 0.001498214 |
| 201216_at   | 0.001649862 | 0.029785562 | 0.976339343 | 0.988190913 |
| 201217_x_at | -0.04853437 | -1.24070908 | 0.219660454 | 0.386559498 |
| 201218_at   | 0.534016025 | 4.825023237 | 1.04E-05    | 0.000110159 |
| 201219_at   | 0.215669034 | 3.754569168 | 0.000401371 | 0.002378421 |
| 201220_x_at | 0.47517941  | 6.850736499 | 5.00E-09    | 2.78E-07    |
| 201221_s_at | 0.278463389 | 4.215391994 | 8.74E-05    | 0.000657605 |

|             |             |             |             |             |
|-------------|-------------|-------------|-------------|-------------|
| 201222_s_at | -0.10425515 | -0.81313723 | 0.419432791 | 0.601673518 |
| 201223_s_at | -0.18586977 | -3.63313002 | 0.000590984 | 0.003298647 |
| 201224_s_at | 0.126925407 | 3.311446922 | 0.001593394 | 0.007537654 |
| 201225_s_at | 0.04834109  | 0.741952064 | 0.461081589 | 0.639422174 |
| 201226_at   | -0.34657666 | -6.51024324 | 1.87E-08    | 7.04E-07    |
| 201227_s_at | -0.14067705 | -2.67420322 | 0.009692688 | 0.034026048 |
| 201228_s_at | -0.01056083 | -0.42630453 | 0.671448787 | 0.802105987 |
| 201229_s_at | 0.165980058 | 2.886993984 | 0.005439999 | 0.021121051 |
| 201230_s_at | 0.192294793 | 3.341137616 | 0.001457072 | 0.006995323 |
| 201231_s_at | 0.000819755 | 0.014384062 | 0.988572463 | 0.994757125 |
| 201232_s_at | 0.070711515 | 0.995175194 | 0.323745095 | 0.505778858 |
| 201233_at   | -0.02134452 | -0.75949743 | 0.45060137  | 0.630029922 |
| 201234_at   | 0.139715945 | 4.170094667 | 0.000101947 | 0.000749253 |
| 201235_s_at | 0.05095731  | 0.827024851 | 0.411579941 | 0.593825242 |
| 201236_s_at | 0.276231161 | 3.331119773 | 0.001501786 | 0.007171475 |
| 201237_at   | 0.100784852 | 1.344398324 | 0.184003881 | 0.341252447 |
| 201238_s_at | -0.02261287 | -0.19762128 | 0.844025685 | 0.914320242 |
| 201239_s_at | -0.17376241 | -2.12815791 | 0.037542766 | 0.101707055 |
| 201240_s_at | 0.186967465 | 3.538440833 | 0.000795403 | 0.004209872 |
| 201241_at   | -0.20982771 | -2.92733446 | 0.00486136  | 0.019279785 |
| 201242_s_at | -0.14639623 | -2.48501934 | 0.015831596 | 0.050862318 |
| 201243_s_at | -0.23738074 | -3.00489026 | 0.003906077 | 0.016076104 |
| 201244_s_at | 0.235046442 | 4.055639046 | 0.000149716 | 0.001032257 |
| 201245_s_at | -0.39183416 | -3.67981662 | 0.000509699 | 0.002912604 |
| 201246_s_at | -0.33643182 | -6.0773808  | 9.85E-08    | 2.50E-06    |
| 201247_at   | -0.13586496 | -3.6374285  | 0.000583011 | 0.003262703 |
| 201248_s_at | -0.14808128 | -3.54953045 | 0.000768371 | 0.004099462 |
| 201249_at   | 0.01610053  | 0.483285279 | 0.630695092 | 0.774443992 |
| 201250_s_at | 0.221371007 | 5.174707818 | 2.92E-06    | 3.86E-05    |
| 201251_at   | -0.19344962 | -2.5953709  | 0.01192332  | 0.0402688   |
| 201252_at   | 0.018696534 | 0.408124911 | 0.684670245 | 0.811458342 |
| 201253_s_at | -0.0935399  | -1.93323439 | 0.058046131 | 0.143267801 |
| 201254_x_at | 0.105523911 | 2.599722292 | 0.011788945 | 0.039875238 |
| 201255_x_at | -0.1203439  | -2.7291554  | 0.008370968 | 0.030187631 |
| 201256_at   | -0.37404504 | -6.3090149  | 4.05E-08    | 1.26E-06    |
| 201257_x_at | -0.0747775  | -1.42400877 | 0.159750303 | 0.308053472 |
| 201258_at   | 0.03154451  | 0.573333314 | 0.568614074 | 0.727818198 |
| 201259_s_at | -0.02932349 | -0.22713295 | 0.821111357 | 0.900555118 |
| 201260_s_at | 0.380185727 | 4.154570718 | 0.000107432 | 0.000782618 |
| 201261_x_at | 0.404102821 | 5.887869304 | 2.03E-07    | 4.37E-06    |
| 201262_s_at | 0.120716313 | 1.972178869 | 0.053317337 | 0.134117096 |
| 201263_at   | 0.090173576 | 1.037585455 | 0.303728111 | 0.483550041 |
| 201264_at   | -0.03081714 | -0.64911483 | 0.518801689 | 0.688265409 |
| 201265_at   | -0.01327145 | -0.44996132 | 0.654399437 | 0.790564828 |
| 201266_at   | 0.102937265 | 1.247372166 | 0.217226026 | 0.383407667 |
| 201267_s_at | -0.56826103 | -6.70532059 | 8.78E-09    | 4.08E-07    |
| 201268_at   | -0.17604239 | -3.26000288 | 0.001858512 | 0.008585077 |
| 201269_s_at | -0.14263527 | -4.69907429 | 1.63E-05    | 0.000160762 |
| 201270_x_at | -0.19054534 | -4.64251039 | 1.99E-05    | 0.000190145 |
| 201271_s_at | 0.270443132 | 5.352938325 | 1.51E-06    | 2.24E-05    |
| 201272_at   | -0.26591957 | -3.43842638 | 0.00108361  | 0.005441491 |
| 201273_s_at | 0.161204604 | 2.125920898 | 0.037736523 | 0.10217003  |
| 201274_at   | -0.11490223 | -2.11232265 | 0.0389332   | 0.104598892 |
| 201275_at   | 0.10886702  | 2.000860152 | 0.050049338 | 0.127540484 |
| 201276_at   | 0.146472269 | 3.565204821 | 0.000731652 | 0.003938686 |
| 201277_s_at | 0.106601607 | 1.482507322 | 0.143566614 | 0.285066604 |
| 201278_at   | 0.041555536 | 0.917604012 | 0.362589664 | 0.545747406 |
| 201279_s_at | 0.109523925 | 1.886142562 | 0.064237353 | 0.155191944 |
| 201280_s_at | 0.047164155 | 0.871891341 | 0.386828034 | 0.569531164 |
| 201281_at   | -0.01118504 | -0.24135789 | 0.810120782 | 0.893352366 |
| 201282_at   | 0.137905304 | 2.941205623 | 0.004675964 | 0.018663765 |
| 201283_s_at | 0.102502284 | 2.002484163 | 0.049869561 | 0.127205663 |
| 201284_s_at | -0.14865715 | -3.32679871 | 0.001521471 | 0.007246891 |
| 201285_at   | 0.114479367 | 3.193954635 | 0.002260044 | 0.010106266 |
| 201286_at   | 0.018453194 | 0.522831477 | 0.603063932 | 0.753898366 |
| 201287_s_at | 0.104474575 | 2.999612005 | 0.003965095 | 0.016283014 |
| 201288_at   | 0.295958763 | 2.79332243  | 0.007037913 | 0.026167919 |
| 201289_at   | 0.782247887 | 3.384352949 | 0.001278215 | 0.006259008 |
| 201290_at   | 0.401778596 | 5.847653075 | 2.36E-07    | 4.91E-06    |
| 201291_s_at | 0.009848761 | 0.449973564 | 0.65439066  | 0.790564828 |
| 201292_at   | -0.0090976  | -0.28511572 | 0.776561343 | 0.871976029 |
| 201293_x_at | -0.28517949 | -5.06955122 | 4.29E-06    | 5.31E-05    |
| 201294_s_at | 0.526570211 | 5.538012177 | 7.58E-07    | 1.28E-05    |
| 201295_s_at | -0.01810633 | -0.16366084 | 0.870561623 | 0.930159402 |
| 201296_s_at | 0.417196239 | 4.446786165 | 3.95E-05    | 0.000338802 |

|             |             |             |             |             |
|-------------|-------------|-------------|-------------|-------------|
| 201297_s_at | 0.024264939 | 0.951817827 | 0.345101132 | 0.528049158 |
| 201298_s_at | 0.068519687 | 1.551397739 | 0.126193903 | 0.259458891 |
| 201299_s_at | 0.048564944 | 1.542935837 | 0.128232861 | 0.262467736 |
| 201300_s_at | -0.0036134  | -0.05946185 | 0.952786688 | 0.975755703 |
| 201301_s_at | 0.287064062 | 4.095277896 | 0.000131133 | 0.000927159 |
| 201302_at   | 0.253933405 | 3.021642751 | 0.003724138 | 0.015439626 |
| 201303_at   | -0.01434381 | -0.29474797 | 0.769228703 | 0.867855811 |
| 201304_at   | -0.46207995 | -4.12433064 | 0.000118949 | 0.000853987 |
| 201305_x_at | 0.659477923 | 6.540453932 | 1.66E-08    | 6.47E-07    |
| 201306_s_at | 0.634249797 | 6.574208752 | 1.46E-08    | 5.92E-07    |
| 201307_at   | 0.320542782 | 4.066716036 | 0.000144281 | 0.001001706 |
| 201308_s_at | -0.0807261  | -1.42810048 | 0.158574115 | 0.306318912 |
| 201309_x_at | -0.12821905 | -3.01406981 | 0.003805382 | 0.015723941 |
| 201310_s_at | 0.059653317 | 0.634328075 | 0.528336799 | 0.695977488 |
| 201311_s_at | -0.16527865 | -2.37183533 | 0.02100651  | 0.064083476 |
| 201312_s_at | 0.135495597 | 1.535431783 | 0.130062918 | 0.265362791 |
| 201313_at   | -0.67887737 | -5.98181576 | 1.42E-07    | 3.31E-06    |
| 201314_at   | -0.25354008 | -3.29608531 | 0.001668569 | 0.007829047 |
| 201315_x_at | 0.589848593 | 3.920675087 | 0.000234015 | 0.001508305 |
| 201316_at   | -0.00561433 | -0.10835001 | 0.914088413 | 0.954246988 |
| 201317_s_at | -0.20680284 | -2.1931334  | 0.032281558 | 0.090339848 |
| 201318_s_at | -0.02679284 | -0.63694196 | 0.526644619 | 0.694915894 |
| 201319_at   | 0.175942257 | 3.660976158 | 0.000541126 | 0.003062427 |
| 201320_at   | 0.017880201 | 0.446634473 | 0.656786202 | 0.792256112 |
| 201321_s_at | 0.021102781 | 0.420444852 | 0.675699216 | 0.805175688 |
| 201322_at   | -0.49267769 | -5.25665505 | 2.16E-06    | 3.01E-05    |
| 201323_at   | -0.28088471 | -3.76936925 | 0.000382715 | 0.002283921 |
| 201324_at   | 0.655116423 | 2.860960915 | 0.005846601 | 0.022417319 |
| 201325_s_at | 0.385609951 | 2.320532022 | 0.023815141 | 0.07098008  |
| 201326_at   | -0.13178058 | -1.93933818 | 0.057282151 | 0.141877374 |
| 201327_s_at | -0.09937826 | -1.20198282 | 0.234207857 | 0.403065869 |
| 201328_at   | 0.272902105 | 3.277244703 | 0.001765339 | 0.008212398 |
| 201329_s_at | 0.133844344 | 1.247148654 | 0.217307365 | 0.383520939 |
| 201330_at   | -0.08768569 | -1.73491836 | 0.088015392 | 0.197667532 |
| 201331_s_at | 0.022101798 | 0.51278164  | 0.610032807 | 0.759114193 |
| 201332_s_at | -0.1027594  | -2.24966335 | 0.028243026 | 0.081115439 |
| 201333_s_at | 0.057547464 | 1.367331767 | 0.176746288 | 0.331604261 |
| 201334_s_at | 0.042237451 | 0.795572332 | 0.429493378 | 0.610467608 |
| 201335_s_at | -0.11703039 | -2.4867996  | 0.015760302 | 0.050651476 |
| 201336_at   | 0.451801472 | 5.774233383 | 3.12E-07    | 6.16E-06    |
| 201337_s_at | -0.13680923 | -0.79693424 | 0.428708212 | 0.60981659  |
| 201338_x_at | -0.18460798 | -3.32712732 | 0.001519965 | 0.007241264 |
| 201339_s_at | 0.111651374 | 1.05024761  | 0.297918771 | 0.477020125 |
| 201340_s_at | -1.08622446 | -5.72944367 | 3.69E-07    | 7.07E-06    |
| 201341_at   | -0.91754349 | -7.46750554 | 4.55E-10    | 5.49E-08    |
| 201342_at   | -0.06546599 | -2.11412483 | 0.038772726 | 0.104255501 |
| 201343_at   | -0.06768087 | -0.96016948 | 0.340917313 | 0.523823253 |
| 201344_at   | -0.20928242 | -3.54381612 | 0.000782189 | 0.004156177 |
| 201345_s_at | -0.23043893 | -3.41924296 | 0.00114919  | 0.005719331 |
| 201346_at   | 0.519705439 | 6.78809236  | 6.37E-09    | 3.27E-07    |
| 201347_x_at | 0.025172513 | 0.434934083 | 0.665208791 | 0.798322    |
| 201348_at   | -0.34808722 | -2.73662492 | 0.008204666 | 0.02970441  |
| 201349_at   | 0.236884458 | 4.344233373 | 5.63E-05    | 0.000455469 |
| 201350_at   | 0.029300082 | 0.844177986 | 0.402005072 | 0.58428348  |
| 201351_s_at | -0.03059879 | -0.31037589 | 0.757376981 | 0.860523504 |
| 201352_at   | -0.09456214 | -1.65155928 | 0.103976923 | 0.22430548  |
| 201353_s_at | 0.183457856 | 4.408565488 | 4.51E-05    | 0.000377282 |
| 201354_s_at | 0.05653266  | 0.99867615  | 0.322060035 | 0.503991984 |
| 201355_s_at | 0.070708742 | 2.677347057 | 0.009612204 | 0.033793943 |
| 201356_at   | -0.01498312 | -0.3451071  | 0.731250243 | 0.843215089 |
| 201357_s_at | -0.12690423 | -3.45676312 | 0.001024256 | 0.005201567 |
| 201358_s_at | 0.178009833 | 4.436702616 | 4.09E-05    | 0.000348152 |
| 201359_at   | -0.00157291 | -0.02433025 | 0.980671894 | 0.990288496 |
| 201360_at   | 0.083057342 | 1.137755403 | 0.25985587  | 0.433905419 |
| 201361_at   | 0.17223966  | 5.157147356 | 3.11E-06    | 4.08E-05    |
| 201362_at   | -0.33736095 | -3.39853408 | 0.001224199 | 0.006039509 |
| 201363_s_at | -0.31592345 | -3.39098162 | 0.001252691 | 0.006153581 |
| 201364_s_at | -0.17783701 | -2.8564911  | 0.005919177 | 0.022643146 |
| 201365_at   | 0.032494448 | 0.806126433 | 0.42343119  | 0.605044817 |
| 201366_at   | 0.009574233 | 0.13857062  | 0.890264832 | 0.941253244 |
| 201367_s_at | 0.090670664 | 0.838266588 | 0.405289229 | 0.587670697 |
| 201368_at   | 0.432265083 | 3.400132736 | 0.001218247 | 0.006012137 |
| 201369_s_at | 0.364407363 | 4.061066304 | 0.000147029 | 0.001017972 |
| 201370_s_at | -0.08331086 | -1.22622915 | 0.22501998  | 0.392268712 |
| 201371_s_at | 0.070261821 | 0.768982869 | 0.444993618 | 0.62518169  |

|             |             |             |             |             |
|-------------|-------------|-------------|-------------|-------------|
| 201372_s_at | -0.14047    | -4.39898395 | 4.66E-05    | 0.000388039 |
| 201373_at   | 0.213782711 | 3.55404071  | 0.000757629 | 0.004057515 |
| 201374_x_at | -0.01731535 | -0.46541254 | 0.64336211  | 0.783357564 |
| 201375_s_at | 0.125691173 | 1.996899337 | 0.050490135 | 0.128451365 |
| 201376_s_at | 0.139583629 | 1.841617247 | 0.070596683 | 0.166681121 |
| 201377_at   | 0.150004495 | 3.494959261 | 0.00091038  | 0.004714564 |
| 201378_s_at | -0.13591203 | -3.21665267 | 0.002113652 | 0.009549468 |
| 201379_s_at | 0.242285861 | 5.088710897 | 4.00E-06    | 5.01E-05    |
| 201380_at   | 0.201477043 | 3.770004508 | 0.000381933 | 0.002279864 |
| 201381_x_at | -0.17505179 | -2.57900962 | 0.012441129 | 0.04168058  |
| 201382_at   | -0.0362711  | -1.09469724 | 0.278131011 | 0.454886597 |
| 201383_s_at | -0.09675409 | -1.51668157 | 0.134726569 | 0.272267683 |
| 201384_s_at | 0.157214972 | 2.427358413 | 0.01830384  | 0.057341597 |
| 201385_at   | 0.148567951 | 2.547379693 | 0.013500459 | 0.044554905 |
| 201386_s_at | -0.10526035 | -1.43097016 | 0.15775323  | 0.305076763 |
| 201387_s_at | -0.84133912 | -5.88602025 | 2.04E-07    | 4.39E-06    |
| 201388_at   | -0.19116987 | -3.68581863 | 0.000500059 | 0.002865213 |
| 201389_at   | 0.024459093 | 0.486977276 | 0.6280921   | 0.772525305 |
| 201390_s_at | -0.05125524 | -1.52958055 | 0.131504271 | 0.267461039 |
| 201391_at   | -0.21974967 | -5.36395536 | 1.45E-06    | 2.17E-05    |
| 201392_s_at | 0.331529005 | 6.757097468 | 7.19E-09    | 3.56E-07    |
| 201393_s_at | 0.340884646 | 5.681272678 | 4.43E-07    | 8.20E-06    |
| 201394_s_at | 0.074721711 | 0.865986686 | 0.390031269 | 0.572963793 |
| 201395_at   | 0.145997725 | 2.884433999 | 0.00547879  | 0.021238449 |
| 201396_s_at | 0.105967791 | 2.429176617 | 0.018220869 | 0.057141751 |
| 201397_at   | 0.478049439 | 6.207327355 | 5.99E-08    | 1.70E-06    |
| 201398_s_at | 0.462866537 | 5.787013171 | 2.97E-07    | 5.94E-06    |
| 201399_s_at | 0.045399469 | 0.423379714 | 0.673569022 | 0.803775711 |
| 201400_at   | -0.03030257 | -0.49688841 | 0.621127889 | 0.767280677 |
| 201401_s_at | -0.22883663 | -3.77819003 | 0.000371994 | 0.002227678 |
| 201402_at   | 0.071215748 | 1.819580965 | 0.073935081 | 0.172756138 |
| 201403_s_at | -0.24693571 | -4.2905415  | 6.77E-05    | 0.000529953 |
| 201404_x_at | -0.05448006 | -2.01363772 | 0.048649814 | 0.124806698 |
| 201405_s_at | -0.20876197 | -4.75701447 | 1.32E-05    | 0.00013471  |
| 201406_at   | -0.1405148  | -2.66421567 | 0.009952481 | 0.034760574 |
| 201407_s_at | 0.095370233 | 1.115306683 | 0.269274621 | 0.444944777 |
| 201408_at   | -0.04361583 | -0.64588409 | 0.52087719  | 0.68981075  |
| 201409_s_at | -0.06351045 | -1.27538089 | 0.207210333 | 0.370968085 |
| 201410_at   | -0.43778578 | -5.29611212 | 1.86E-06    | 2.67E-05    |
| 201411_s_at | -0.49623382 | -5.11428712 | 3.64E-06    | 4.65E-05    |
| 201412_at   | 0.447208773 | 6.074306678 | 9.96E-08    | 2.51E-06    |
| 201413_at   | 0.211821615 | 2.895838799 | 0.005307923 | 0.020703587 |
| 201414_s_at | 0.05002368  | 1.163730918 | 0.249252258 | 0.421698285 |
| 201415_at   | -0.01655996 | -0.3909071  | 0.697284345 | 0.820898099 |
| 201416_at   | 0.019669202 | 0.486218004 | 0.628627028 | 0.772891311 |
| 201417_at   | 0.267242377 | 2.895887969 | 0.005307197 | 0.020702562 |
| 201418_s_at | 0.089473852 | 1.182299262 | 0.241864913 | 0.412274561 |
| 201419_at   | -0.23792056 | -4.52023102 | 3.06E-05    | 0.000272537 |
| 201420_s_at | -0.05279193 | -1.41267044 | 0.163044933 | 0.312577391 |
| 201421_s_at | 0.005910001 | 0.229295144 | 0.819438404 | 0.899391958 |
| 201422_at   | 0.136967876 | 2.184651587 | 0.032929397 | 0.091767825 |
| 201423_s_at | 0.096949073 | 1.549571694 | 0.126631697 | 0.260107721 |
| 201424_s_at | 0.173755143 | 3.552554906 | 0.000761152 | 0.004069154 |
| 201425_at   | 0.073563368 | 1.278958631 | 0.205956121 | 0.369360577 |
| 201426_s_at | 0.556603101 | 4.591515711 | 2.38E-05    | 0.000220997 |
| 201427_s_at | 0.446463046 | 4.880745497 | 8.50E-06    | 9.33E-05    |
| 201428_at   | 0.008314963 | 0.270130992 | 0.788009098 | 0.878959536 |
| 201429_s_at | -0.0108439  | -0.32569752 | 0.745814059 | 0.852915095 |
| 201430_s_at | 0.376282511 | 3.120237143 | 0.002803887 | 0.012139041 |
| 201431_s_at | 0.693329995 | 7.052006573 | 2.29E-09    | 1.60E-07    |
| 201432_at   | 0.291895783 | 3.09819761  | 0.002988913 | 0.012801595 |
| 201433_s_at | -0.33850887 | -5.79590287 | 2.87E-07    | 5.77E-06    |
| 201434_at   | -0.02186995 | -0.70611481 | 0.482916322 | 0.657986303 |
| 201435_s_at | -0.19550304 | -2.02450016 | 0.047486688 | 0.122476631 |
| 201436_at   | -0.05188537 | -0.57706642 | 0.566106285 | 0.726439132 |
| 201437_s_at | 0.054967876 | 0.722061271 | 0.473130055 | 0.649240948 |
| 201438_at   | 0.117510086 | 2.983876502 | 0.004146004 | 0.016893985 |
| 201439_at   | -0.12186681 | -3.55554167 | 0.000754086 | 0.004041931 |
| 201440_at   | 0.261348162 | 5.199894112 | 2.66E-06    | 3.58E-05    |
| 201441_at   | -0.11756473 | -2.07756765 | 0.042143045 | 0.111489293 |
| 201442_s_at | -0.01673354 | -0.52940101 | 0.598528364 | 0.750550078 |
| 201443_s_at | -0.17848517 | -1.89391241 | 0.063178862 | 0.153189546 |
| 201444_s_at | -0.46799654 | -3.91978302 | 0.000234701 | 0.001511638 |
| 201445_at   | 0.345091198 | 1.932515653 | 0.05813666  | 0.143406756 |
| 201446_s_at | 0.100385138 | 1.480140488 | 0.144195376 | 0.286035497 |

|             |             |             |             |             |
|-------------|-------------|-------------|-------------|-------------|
| 201447_at   | -0.01695082 | -0.33274983 | 0.740511311 | 0.849350225 |
| 201448_at   | 0.056734918 | 0.801663052 | 0.425988628 | 0.607394744 |
| 201449_at   | 0.098609521 | 2.230688127 | 0.029545883 | 0.084079249 |
| 201450_s_at | 0.071207479 | 0.983264591 | 0.329521888 | 0.511976089 |
| 201451_x_at | -0.10287316 | -1.81230893 | 0.075065413 | 0.174721288 |
| 201452_at   | -0.12748973 | -2.61078581 | 0.011453473 | 0.038961389 |
| 201453_x_at | -0.15901105 | -3.00021923 | 0.003958264 | 0.016260936 |
| 201454_s_at | -0.03164863 | -0.45248182 | 0.652593574 | 0.789352848 |
| 201455_s_at | -0.20564223 | -3.13346636 | 0.002698035 | 0.011752494 |
| 201456_s_at | 0.121424722 | 1.866311267 | 0.067007252 | 0.160323791 |
| 201457_x_at | -0.03006673 | -0.4795006  | 0.633368319 | 0.776365903 |
| 201458_s_at | 0.163221991 | 2.631342987 | 0.010853117 | 0.03723973  |
| 201459_at   | -0.02191398 | -0.47235344 | 0.638429948 | 0.780029833 |
| 201460_at   | 0.336745113 | 6.482868689 | 2.07E-08    | 7.58E-07    |
| 201461_s_at | 0.101589375 | 3.357391841 | 0.001387189 | 0.006708098 |
| 201462_at   | 0.207750838 | 3.631954693 | 0.000593182 | 0.003306573 |
| 201463_s_at | 0.153426219 | 1.749993737 | 0.085357018 | 0.193055458 |
| 201464_x_at | 0.400786074 | 3.198678655 | 0.002228813 | 0.009989714 |
| 201465_s_at | 0.380836897 | 3.16013569  | 0.00249593  | 0.010979143 |
| 201466_s_at | 0.193376941 | 2.060482595 | 0.043803493 | 0.115005585 |
| 201467_s_at | -0.22713794 | -3.84577927 | 0.000298889 | 0.00185682  |
| 201468_s_at | -0.0117458  | -0.19740196 | 0.84419651  | 0.914372314 |
| 201469_s_at | 0.194791    | 3.248071192 | 0.001925682 | 0.008826734 |
| 201470_at   | -0.19944799 | -2.77855225 | 0.007326177 | 0.027030586 |
| 201471_s_at | 0.1860081   | 3.524396615 | 0.000830937 | 0.004367944 |
| 201472_at   | -0.11033338 | -1.38338414 | 0.171797904 | 0.324884092 |
| 201473_at   | 0.133984709 | 1.125988741 | 0.264763206 | 0.439724161 |
| 201474_s_at | -0.04151551 | -0.92435071 | 0.359096716 | 0.542224151 |
| 201475_x_at | -0.15858849 | -4.20534897 | 9.05E-05    | 0.000677893 |
| 201476_s_at | -0.11202506 | -2.26986849 | 0.026911791 | 0.078054826 |
| 201477_s_at | 0.137205842 | 2.326239288 | 0.023486971 | 0.070186523 |
| 201478_s_at | 0.05487705  | 1.218792832 | 0.227809381 | 0.395327207 |
| 201479_at   | 0.142006437 | 2.644084155 | 0.010495567 | 0.036260657 |
| 201480_s_at | -0.06207799 | -1.64619712 | 0.105079699 | 0.226051595 |
| 201481_s_at | 0.19311549  | 4.700003348 | 1.62E-05    | 0.000160384 |
| 201482_at   | 0.034741479 | 1.035895368 | 0.304509318 | 0.484483105 |
| 201483_s_at | -0.10116124 | -1.69935118 | 0.094559328 | 0.20866269  |
| 201484_at   | -0.1133386  | -2.58334132 | 0.012302085 | 0.041301442 |
| 201485_s_at | -0.02615848 | -0.38725041 | 0.699974542 | 0.822713156 |
| 201486_at   | -0.10472848 | -1.18729468 | 0.239904752 | 0.409792966 |
| 201487_at   | 0.191172773 | 2.752976366 | 0.00785115  | 0.028643557 |
| 201488_x_at | -0.04586925 | -0.90989821 | 0.36660577  | 0.549778081 |
| 201489_at   | 0.290145749 | 3.598558543 | 0.000659001 | 0.003610212 |
| 201490_s_at | 0.058978117 | 0.501967319 | 0.617572509 | 0.765109235 |
| 201491_at   | 0.092150087 | 1.284511515 | 0.204020722 | 0.367013931 |
| 201492_s_at | 0.005044566 | 0.11281999  | 0.910559095 | 0.952859114 |
| 201493_s_at | 0.155036189 | 2.150861549 | 0.035624931 | 0.097612004 |
| 201494_at   | 0.40949171  | 5.535463832 | 7.65E-07    | 1.29E-05    |
| 201495_x_at | -0.00014841 | -0.0057347  | 0.995443883 | 0.997865528 |
| 201496_x_at | 0.061864093 | 1.330133995 | 0.188630884 | 0.346854206 |
| 201497_x_at | 0.204604735 | 3.653581692 | 0.000553959 | 0.003122796 |
| 201498_at   | 0.110946378 | 1.59788452  | 0.115450568 | 0.242570485 |
| 201499_s_at | -0.03873688 | -0.90674548 | 0.368257078 | 0.551417071 |
| 201500_s_at | -0.13648086 | -4.11684542 | 0.000121979 | 0.000872377 |
| 201501_s_at | 0.075129557 | 0.946066251 | 0.348001872 | 0.530996915 |
| 201502_s_at | 0.817333251 | 5.245243388 | 2.25E-06    | 3.12E-05    |
| 201503_at   | 0.360013539 | 4.05183022  | 0.00015163  | 0.001042719 |
| 201504_s_at | -0.25194429 | -3.42156878 | 0.001141043 | 0.005685116 |
| 201505_at   | -0.16864455 | -5.05344814 | 4.55E-06    | 5.59E-05    |
| 201506_at   | 0.178187233 | 2.544401803 | 0.013604289 | 0.04483136  |
| 201507_at   | -0.16118425 | -4.5146731  | 3.12E-05    | 0.000276812 |
| 201508_at   | 0.137604635 | 1.651053258 | 0.104080586 | 0.224442438 |
| 201509_at   | -0.06361158 | -1.80558756 | 0.07612299  | 0.176561097 |
| 201510_at   | 0.052782168 | 1.405947712 | 0.165023064 | 0.315530537 |
| 201511_at   | -0.05083804 | -1.51240377 | 0.135808926 | 0.273798832 |
| 201512_s_at | -0.91025183 | -6.7199126  | 8.30E-09    | 3.90E-07    |
| 201513_at   | 0.080099736 | 1.540881831 | 0.12873173  | 0.263235656 |
| 201514_s_at | 0.033790923 | 0.690471855 | 0.49262493  | 0.666440737 |
| 201515_s_at | 0.039092542 | 0.717178216 | 0.47611482  | 0.652054075 |
| 201516_at   | -0.43270306 | -7.45502548 | 4.77E-10    | 5.67E-08    |
| 201517_at   | 0.02122226  | 0.348501869 | 0.728713006 | 0.841715126 |
| 201518_at   | 0.074178439 | 1.257414578 | 0.213594624 | 0.379049037 |
| 201519_at   | -1.00512349 | -7.89686521 | 8.57E-11    | 1.95E-08    |
| 201520_s_at | -0.0044151  | -0.04327973 | 0.965625769 | 0.982486811 |
| 201521_s_at | -0.17293996 | -3.16776154 | 0.002440805 | 0.010771646 |

|             |             |             |             |             |
|-------------|-------------|-------------|-------------|-------------|
| 201522_x_at | -0.35598981 | -5.55769927 | 7.04E-07    | 1.20E-05    |
| 201523_x_at | -0.27576773 | -4.83388125 | 1.01E-05    | 0.00010735  |
| 201524_x_at | -0.10626376 | -2.43010714 | 0.018178537 | 0.057041016 |
| 201525_at   | 0.281663784 | 3.506204263 | 0.000879216 | 0.004579179 |
| 201526_at   | -0.34186883 | -5.48659222 | 9.19E-07    | 1.49E-05    |
| 201527_at   | -0.3126899  | -7.27416493 | 9.65E-10    | 9.15E-08    |
| 201528_at   | 0.237510924 | 3.348077333 | 0.001426838 | 0.006873799 |
| 201529_s_at | 0.103286223 | 1.34790889  | 0.182878467 | 0.339729172 |
| 201530_x_at | -0.05840176 | -0.85436484 | 0.396384189 | 0.578947095 |
| 201531_at   | 0.192344577 | 1.361125323 | 0.178688462 | 0.334293806 |
| 201532_at   | -0.23781409 | -2.01681068 | 0.04830755  | 0.124099616 |
| 201533_at   | 0.306718659 | 4.478167674 | 3.54E-05    | 0.000309171 |
| 201534_s_at | -0.19958411 | -3.17624377 | 0.002380833 | 0.010551144 |
| 201535_at   | -0.39602363 | -5.81209131 | 2.70E-07    | 5.47E-06    |
| 201536_at   | 0.009978022 | 0.222151518 | 0.824968799 | 0.902813601 |
| 201537_s_at | -0.22644932 | -3.2704508  | 0.001801514 | 0.008354598 |
| 201538_s_at | -0.13592446 | -2.94567989 | 0.004617577 | 0.018471962 |
| 201539_s_at | -0.17294354 | -1.36673074 | 0.176933659 | 0.331872207 |
| 201540_at   | 0.097950792 | 1.399647053 | 0.166893779 | 0.318208906 |
| 201541_s_at | 0.028387055 | 0.565598837 | 0.573827133 | 0.731745435 |
| 201542_at   | 0.293822443 | 3.986552219 | 0.000188345 | 0.001252603 |
| 201543_s_at | -0.13737787 | -2.34585727 | 0.022389418 | 0.067440704 |
| 201544_x_at | 0.06950249  | 1.967322791 | 0.053888374 | 0.135279402 |
| 201545_s_at | 0.184046904 | 3.141137137 | 0.002638386 | 0.011519611 |
| 201546_at   | 0.079925696 | 1.312552106 | 0.194454476 | 0.354528594 |
| 201547_at   | 0.013213602 | 0.306828265 | 0.760062375 | 0.861843702 |
| 201548_s_at | -0.05597389 | -1.33839801 | 0.185939626 | 0.34368724  |
| 201549_x_at | -0.18927812 | -3.87895064 | 0.000268268 | 0.001690319 |
| 201550_x_at | -0.09750035 | -1.356621   | 0.180108163 | 0.336274137 |
| 201551_s_at | -0.04076117 | -0.3431331  | 0.732726992 | 0.844028391 |
| 201552_at   | 0.356142553 | 3.901961254 | 0.000248823 | 0.001587265 |
| 201553_s_at | 0.506909204 | 7.512994213 | 3.81E-10    | 4.87E-08    |
| 201554_x_at | 0.007890233 | 0.10353347  | 0.917893308 | 0.956525001 |
| 201555_at   | 0.084690997 | 2.275078819 | 0.026577643 | 0.077341322 |
| 201556_s_at | -0.28054503 | -3.8516693  | 0.000293217 | 0.001826408 |
| 201557_at   | -0.32204175 | -4.43799946 | 4.07E-05    | 0.000346902 |
| 201558_at   | 0.019284477 | 0.378367297 | 0.70652582  | 0.827009559 |
| 201559_s_at | -0.0779621  | -0.5501773  | 0.584290088 | 0.739883616 |
| 201560_at   | 0.486069095 | 4.24362811  | 7.94E-05    | 0.000607419 |
| 201561_s_at | -0.11322945 | -2.55127709 | 0.013365654 | 0.04421122  |
| 201562_s_at | 0.096910983 | 2.869657753 | 0.005707742 | 0.021971609 |
| 201563_at   | 0.330905574 | 4.321345949 | 6.09E-05    | 0.000485272 |
| 201564_s_at | -0.17241184 | -2.16069916 | 0.0348209   | 0.095871983 |
| 201565_s_at | 0.696041902 | 4.985993995 | 5.81E-06    | 6.80E-05    |
| 201566_x_at | 0.30042186  | 3.374367809 | 0.001317593 | 0.006427887 |
| 201567_s_at | 0.060554216 | 1.201014824 | 0.234580249 | 0.403427116 |
| 201568_at   | -0.240494   | -3.86102394 | 0.000284421 | 0.001780301 |
| 201569_s_at | -0.13947777 | -1.79940478 | 0.077106801 | 0.17841352  |
| 201570_at   | -0.11343022 | -2.95098928 | 0.004549171 | 0.018257145 |
| 201571_s_at | -0.0573758  | -0.81449286 | 0.418662281 | 0.601113331 |
| 201572_x_at | 0.156921409 | 2.85204203  | 0.005992243 | 0.022879568 |
| 201573_s_at | 0.050841242 | 0.843943891 | 0.402134815 | 0.584381862 |
| 201574_at   | -0.00864514 | -0.14493864 | 0.885256968 | 0.938530476 |
| 201575_at   | 0.187903287 | 4.074432182 | 0.000140608 | 0.00098158  |
| 201576_s_at | 0.035873987 | 0.830532655 | 0.409610674 | 0.591786391 |
| 201577_at   | -0.44817267 | -5.74871616 | 3.43E-07    | 6.69E-06    |
| 201578_at   | 0.32203156  | 3.191343519 | 0.002277483 | 0.010164298 |
| 201579_at   | 0.418241251 | 5.045577366 | 4.68E-06    | 5.71E-05    |
| 201580_s_at | -0.06030431 | -0.98626505 | 0.328060211 | 0.510602068 |
| 201581_at   | 0.102534055 | 1.015167455 | 0.314201623 | 0.495319187 |
| 201582_at   | -0.00923178 | -0.18661551 | 0.852607033 | 0.919093889 |
| 201583_s_at | -0.13295993 | -2.04039798 | 0.045827652 | 0.119236738 |
| 201584_s_at | 0.383094538 | 6.037160207 | 1.15E-07    | 2.81E-06    |
| 201585_s_at | 0.06375443  | 1.009241008 | 0.317010668 | 0.49826613  |
| 201586_s_at | -0.03708376 | -0.38040923 | 0.705017901 | 0.826215632 |
| 201587_s_at | 0.365073884 | 4.552557562 | 2.73E-05    | 0.000248161 |
| 201588_at   | -0.10528102 | -1.9104614  | 0.060973597 | 0.148913419 |
| 201589_at   | 0.6185478   | 6.747166222 | 7.47E-09    | 3.64E-07    |
| 201590_x_at | 0.552342767 | 4.621663672 | 2.14E-05    | 0.000202421 |
| 201591_s_at | -0.13698501 | -3.86059689 | 0.000284817 | 0.00178253  |
| 201592_at   | -0.14072456 | -2.65111845 | 0.010302803 | 0.035721711 |
| 201593_s_at | -0.18954863 | -2.48371369 | 0.015884069 | 0.051008896 |
| 201594_s_at | 0.338843905 | 6.010051914 | 1.27E-07    | 3.05E-06    |
| 201595_s_at | -0.41687189 | -4.41609066 | 4.39E-05    | 0.000369166 |
| 201596_x_at | 0.084977874 | 1.97231795  | 0.053301059 | 0.134083696 |

|             |             |             |             |             |
|-------------|-------------|-------------|-------------|-------------|
| 201597_at   | -0.32121297 | -4.12378159 | 0.000119169 | 0.000855289 |
| 201598_s_at | 0.303172926 | 6.374387484 | 3.15E-08    | 1.03E-06    |
| 201599_at   | -0.22260913 | -2.60136494 | 0.011738577 | 0.039737991 |
| 201600_at   | -0.04505957 | -1.24167157 | 0.219307564 | 0.386108176 |
| 201601_x_at | 0.509422615 | 3.570223612 | 0.000720252 | 0.003887044 |
| 201602_s_at | 0.104852731 | 1.806641528 | 0.075956333 | 0.17631748  |
| 201603_at   | 0.004894767 | 0.064506486 | 0.94878662  | 0.973711114 |
| 201604_s_at | -0.11452149 | -2.34098919 | 0.022657417 | 0.068110935 |
| 201605_x_at | 0.009238845 | 0.214052268 | 0.831249795 | 0.906633537 |
| 201606_s_at | 0.110053537 | 1.803549189 | 0.076446171 | 0.177178462 |
| 201607_at   | -0.14535884 | -3.98520303 | 0.000189187 | 0.001257272 |
| 201608_s_at | 0.000952355 | 0.013307717 | 0.989427521 | 0.995026494 |
| 201609_x_at | -0.17214288 | -4.1585508  | 0.000105999 | 0.000773692 |
| 201610_at   | -0.01151717 | -0.52653429 | 0.600505577 | 0.752057378 |
| 201611_s_at | -0.25789537 | -4.38256733 | 4.93E-05    | 0.000406977 |
| 201612_at   | 0.276217232 | 4.250165077 | 7.77E-05    | 0.000596593 |
| 201613_s_at | -0.33400932 | -4.05697093 | 0.000149052 | 0.001028633 |
| 201614_s_at | 0.069914386 | 1.225209756 | 0.225400873 | 0.392764185 |
| 201615_x_at | 0.113176149 | 2.544508677 | 0.013600551 | 0.044824375 |
| 201616_s_at | 0.602897619 | 6.333086471 | 3.69E-08    | 1.17E-06    |
| 201617_x_at | 0.332089359 | 2.858051145 | 0.005893753 | 0.02255554  |
| 201618_x_at | -0.14664161 | -2.40040301 | 0.019574325 | 0.060528315 |
| 201619_at   | -0.23141419 | -3.17397614 | 0.002396729 | 0.010604066 |
| 201620_at   | -0.19852917 | -4.45694432 | 3.81E-05    | 0.000329402 |
| 201621_at   | 0.026492855 | 0.678203042 | 0.500313906 | 0.672907596 |
| 201622_at   | 0.030577323 | 0.831209959 | 0.409231101 | 0.591429474 |
| 201623_s_at | 0.007124641 | 0.135865123 | 0.892393831 | 0.942370531 |
| 201624_at   | 0.000410003 | 0.003610913 | 0.997131186 | 0.998640408 |
| 201625_s_at | 0.061357585 | 1.104573194 | 0.273861994 | 0.450089283 |
| 201626_at   | 0.22439652  | 2.785907345 | 0.007181298 | 0.026593342 |
| 201627_s_at | 0.078214533 | 0.945148849 | 0.348466019 | 0.531559946 |
| 201628_s_at | -0.28775001 | -4.45308413 | 3.86E-05    | 0.000332915 |
| 201629_s_at | -0.32152583 | -5.08741704 | 4.02E-06    | 5.03E-05    |
| 201630_s_at | -0.38634852 | -4.52584374 | 3.00E-05    | 0.000268254 |
| 201631_s_at | 0.268753754 | 3.345806247 | 0.001436666 | 0.006913696 |
| 201632_at   | -0.00161828 | -0.03787619 | 0.969915211 | 0.984878345 |
| 201633_s_at | -0.07555119 | -2.37388687 | 0.020900621 | 0.063830159 |
| 201634_s_at | 0.006729298 | 0.120615915 | 0.904408113 | 0.949334321 |
| 201635_s_at | 0.2505421   | 3.39281685  | 0.001245711 | 0.006127371 |
| 201636_at   | 0.396546248 | 4.905950734 | 7.76E-06    | 8.66E-05    |
| 201637_s_at | 0.433149009 | 4.8398904   | 9.84E-06    | 0.000105361 |
| 201638_s_at | -0.04804234 | -1.28646244 | 0.20334398  | 0.366172694 |
| 201639_s_at | -0.10102886 | -2.05401456 | 0.044446733 | 0.116361864 |
| 201640_x_at | -0.20738343 | -5.33355896 | 1.62E-06    | 2.39E-05    |
| 201641_at   | 0.387620347 | 4.3563759   | 5.40E-05    | 0.000439768 |
| 201642_at   | -0.2145345  | -5.38993365 | 1.32E-06    | 2.00E-05    |
| 201643_x_at | 0.091151091 | 2.044941843 | 0.045362772 | 0.118199218 |
| 201644_at   | 0.013198429 | 0.364680609 | 0.716663369 | 0.83402649  |
| 201645_at   | 0.869695618 | 5.005894624 | 5.40E-06    | 6.42E-05    |
| 201646_at   | -0.17414788 | -1.21838976 | 0.227961294 | 0.395483333 |
| 201647_s_at | -0.25263019 | -2.07504054 | 0.042385153 | 0.111992798 |
| 201648_at   | 0.209549567 | 3.698446716 | 0.000480344 | 0.002768575 |
| 201649_at   | 0.189431213 | 2.923430916 | 0.00491475  | 0.019447229 |
| 201650_at   | 0.020366289 | 0.718134679 | 0.47552935  | 0.651416166 |
| 201651_s_at | 0.404468205 | 6.425201789 | 2.59E-08    | 8.91E-07    |
| 201652_at   | -0.08726102 | -1.13776531 | 0.259851764 | 0.433905419 |
| 201653_at   | -0.10931376 | -1.33595077 | 0.186733542 | 0.344668298 |
| 201654_s_at | 0.00687781  | 0.150692537 | 0.880736084 | 0.936139488 |
| 201655_s_at | 0.090249195 | 1.993531064 | 0.05086761  | 0.129205754 |
| 201656_at   | 0.553410778 | 6.490503701 | 2.01E-08    | 7.42E-07    |
| 201657_at   | -0.082612   | -1.97069154 | 0.053491682 | 0.134427027 |
| 201658_at   | -0.29788889 | -5.55642658 | 7.08E-07    | 1.20E-05    |
| 201659_s_at | -0.17238698 | -2.44088653 | 0.017694551 | 0.055765101 |
| 201660_at   | -0.08774847 | -1.68708021 | 0.096907844 | 0.212502104 |
| 201661_s_at | 0.019622931 | 0.338965587 | 0.735848032 | 0.846412731 |
| 201662_s_at | -0.22607332 | -3.54442732 | 0.0007807   | 0.004150238 |
| 201663_s_at | 0.025341913 | 0.660748491 | 0.511364412 | 0.682104113 |
| 201664_at   | 0.131516748 | 3.837358315 | 0.000307182 | 0.001900411 |
| 201665_x_at | 0.038459769 | 0.807204636 | 0.422814784 | 0.604724729 |
| 201666_at   | 0.597720414 | 4.38696444  | 4.86E-05    | 0.000401658 |
| 201667_at   | 0.776813037 | 6.492422663 | 2.00E-08    | 7.39E-07    |
| 201668_x_at | 0.07433666  | 1.111500391 | 0.270895159 | 0.44668117  |
| 201669_s_at | 0.103435316 | 0.927276007 | 0.357588976 | 0.540631112 |
| 201670_s_at | 0.281234189 | 4.352020806 | 5.48E-05    | 0.000445116 |
| 201671_x_at | -0.0311798  | -0.48265482 | 0.631140059 | 0.774723599 |



|             |             |             |             |             |
|-------------|-------------|-------------|-------------|-------------|
| 201672_s_at | -0.08727535 | -1.56842235 | 0.122170212 | 0.25297018  |
| 201673_s_at | 0.230964922 | 4.824023445 | 1.04E-05    | 0.000110476 |
| 201674_s_at | -0.02721188 | -0.56425459 | 0.574735522 | 0.732480422 |
| 201675_at   | -0.01381819 | -0.30411486 | 0.762118306 | 0.863127128 |
| 201676_x_at | -0.33494869 | -4.33410863 | 5.83E-05    | 0.000468131 |
| 201677_at   | -0.43323446 | -5.99505841 | 1.35E-07    | 3.19E-06    |
| 201678_s_at | -0.15727816 | -3.03210001 | 0.003614605 | 0.015041335 |
| 201679_at   | 0.003647838 | 0.097688294 | 0.92251337  | 0.959430745 |
| 201680_x_at | 0.036316459 | 0.637481412 | 0.526295741 | 0.694599098 |
| 201681_s_at | 0.513173657 | 5.975507604 | 1.45E-07    | 3.36E-06    |
| 201682_at   | 0.010924833 | 0.253957938 | 0.80041754  | 0.88716484  |
| 201683_x_at | 0.001168508 | 0.027308381 | 0.978306613 | 0.988954042 |
| 201684_s_at | -0.08285822 | -2.42784324 | 0.018281683 | 0.057290826 |
| 201685_s_at | -0.02493859 | -0.40412098 | 0.687595727 | 0.813717851 |
| 201686_x_at | -0.19259343 | -4.51053777 | 3.16E-05    | 0.000279866 |
| 201687_s_at | -0.03418996 | -0.52550991 | 0.601212839 | 0.752560055 |
| 201688_s_at | -0.51047754 | -3.60316979 | 0.000649515 | 0.003566987 |
| 201689_s_at | -0.50627196 | -3.7030891  | 0.000473285 | 0.002734235 |
| 201690_s_at | -0.21443794 | -2.53054903 | 0.014096869 | 0.046133522 |
| 201691_s_at | -0.04680943 | -1.3777636  | 0.173518281 | 0.327251509 |
| 201692_at   | -0.08618765 | -1.91922744 | 0.059832194 | 0.146714607 |
| 201693_s_at | -0.36790483 | -3.56857866 | 0.00072397  | 0.003902973 |
| 201694_s_at | -0.65910255 | -5.1248834  | 3.50E-06    | 4.50E-05    |
| 201695_s_at | 0.129999293 | 1.911591123 | 0.060825467 | 0.148636436 |
| 201696_at   | 0.112014826 | 2.529276393 | 0.014142922 | 0.046255066 |
| 201697_s_at | 0.065308919 | 1.133934459 | 0.26144228  | 0.435789139 |
| 201698_s_at | 0.006328018 | 0.149423405 | 0.881732913 | 0.936753449 |
| 201699_at   | -0.04294788 | -0.40976655 | 0.683472176 | 0.810790956 |
| 201700_at   | 0.130033312 | 2.810206942 | 0.0067212   | 0.025168318 |
| 201701_s_at | 0.113150953 | 2.968496599 | 0.004330222 | 0.017521619 |
| 201702_s_at | 0.053839541 | 1.201290193 | 0.23447427  | 0.403322456 |
| 201703_s_at | 0.063792773 | 1.33417882  | 0.187309987 | 0.345254762 |
| 201704_at   | -0.59803678 | -5.97681985 | 1.44E-07    | 3.35E-06    |
| 201705_at   | -0.09836646 | -1.71109515 | 0.092355687 | 0.204963768 |
| 201706_s_at | -0.0671389  | -1.84119423 | 0.070659554 | 0.16676789  |
| 201707_at   | -0.15357092 | -3.64721019 | 0.000565249 | 0.003177645 |
| 201708_s_at | -0.34454915 | -6.92151758 | 3.80E-09    | 2.28E-07    |
| 201709_s_at | -0.23182071 | -5.76775021 | 3.19E-07    | 6.30E-06    |
| 201710_at   | -0.03003322 | -0.66368541 | 0.509495939 | 0.680444433 |
| 201711_x_at | 0.012153899 | 0.180877516 | 0.857088204 | 0.921938741 |
| 201712_s_at | -0.08332729 | -1.66003362 | 0.102253348 | 0.221393563 |
| 201713_s_at | 0.038528278 | 0.434796847 | 0.665307841 | 0.79835753  |
| 201714_at   | -0.16275682 | -3.24078699 | 0.001967805 | 0.008985092 |
| 201715_s_at | 0.113101678 | 2.712734146 | 0.008747498 | 0.031282964 |
| 201716_at   | 0.067036568 | 1.668306048 | 0.100593403 | 0.218575879 |
| 201717_at   | -0.05164353 | -1.47420387 | 0.145781996 | 0.288236108 |
| 201718_s_at | -0.32385665 | -3.74381666 | 0.000415468 | 0.002448968 |
| 201719_s_at | 0.127620602 | 2.277681777 | 0.026412092 | 0.07702507  |
| 201720_s_at | 0.064673975 | 0.529790044 | 0.598260273 | 0.750398476 |
| 201721_s_at | 0.43699513  | 3.536385888 | 0.000800511 | 0.004231893 |
| 201722_s_at | -0.06964649 | -1.06284082 | 0.29221705  | 0.470673024 |
| 201723_s_at | 0.021100367 | 0.494290918 | 0.622949726 | 0.768426738 |
| 201724_s_at | -0.27396535 | -4.35990961 | 5.33E-05    | 0.000435479 |
| 201725_at   | -0.3990161  | -6.54394928 | 1.64E-08    | 6.42E-07    |
| 201726_at   | 0.354083676 | 4.264348157 | 7.40E-05    | 0.000572853 |
| 201727_s_at | -0.02696572 | -0.61764521 | 0.539203513 | 0.705085214 |
| 201728_s_at | 0.040133796 | 1.103753707 | 0.274214471 | 0.450442649 |
| 201729_s_at | -0.06878724 | -1.2626101  | 0.211733616 | 0.37671877  |
| 201730_s_at | 0.275267946 | 3.614552126 | 0.000626655 | 0.00346272  |
| 201731_s_at | 0.104403402 | 3.380201257 | 0.00129445  | 0.00632811  |
| 201732_s_at | 0.034713783 | 0.561088682 | 0.576877676 | 0.734022807 |
| 201733_at   | -0.09015438 | -1.61060394 | 0.112643194 | 0.238116054 |
| 201734_at   | 0.020456949 | 0.370031486 | 0.712693826 | 0.831225044 |
| 201735_s_at | -0.10387654 | -1.39810311 | 0.167354671 | 0.318883605 |
| 201736_s_at | -0.09301797 | -1.01279054 | 0.315326221 | 0.496583466 |
| 201737_s_at | 0.322158155 | 3.511508961 | 0.00086487  | 0.00451551  |
| 201738_at   | -0.34588435 | -4.10551037 | 0.00012671  | 0.000901164 |
| 201739_at   | 0.54033285  | 4.42192692  | 4.30E-05    | 0.000363415 |
| 201740_at   | -0.51330569 | -5.85783389 | 2.27E-07    | 4.76E-06    |
| 201741_x_at | -0.04335919 | -1.08920164 | 0.280526582 | 0.457707778 |
| 201742_x_at | -0.04599558 | -0.538585   | 0.592214533 | 0.745792652 |
| 201743_at   | 0.356983765 | 2.095231229 | 0.040484075 | 0.107909244 |
| 201744_s_at | 0.018997062 | 0.810433316 | 0.420972182 | 0.602910618 |
| 201745_at   | 0.364605194 | 4.223550715 | 8.51E-05    | 0.000642767 |
| 201746_at   | 0.203061846 | 3.756373005 | 0.000399051 | 0.002367321 |

|             |             |             |             |             |
|-------------|-------------|-------------|-------------|-------------|
| 201747_s_at | -0.01668532 | -0.47508217 | 0.636495397 | 0.778432321 |
| 201748_s_at | 0.123973988 | 2.182659776 | 0.033083176 | 0.092121702 |
| 201749_at   | 0.287653307 | 6.031062768 | 1.18E-07    | 2.86E-06    |
| 201750_s_at | -0.05368303 | -0.86394751 | 0.391141339 | 0.573971917 |
| 201751_at   | -0.03862447 | -0.97293964 | 0.334584715 | 0.517355608 |
| 201752_s_at | 0.36177805  | 4.4360727   | 4.10E-05    | 0.000348781 |
| 201753_s_at | 0.511388641 | 6.567113098 | 1.50E-08    | 6.03E-07    |
| 201754_at   | -0.34453519 | -4.54397476 | 2.81E-05    | 0.000253986 |
| 201755_at   | 0.120365486 | 3.344718628 | 0.001441396 | 0.006933469 |
| 201756_at   | -0.12813009 | -1.85029002 | 0.069318027 | 0.164531375 |
| 201757_at   | -0.33192833 | -4.30119071 | 6.53E-05    | 0.000514052 |
| 201758_at   | -0.07389086 | -1.68243426 | 0.09780942  | 0.213880937 |
| 201759_at   | -0.00059634 | -0.01446196 | 0.98851058  | 0.994742746 |
| 201760_s_at | -0.28225205 | -4.39141339 | 4.78E-05    | 0.000396631 |
| 201761_at   | 0.466208575 | 2.675274218 | 0.009665201 | 0.033956227 |
| 201762_s_at | 0.264554105 | 4.244973495 | 7.91E-05    | 0.000605079 |
| 201763_s_at | 0.079819454 | 3.10109462  | 0.002963956 | 0.012711102 |
| 201764_at   | 0.052326109 | 1.324211311 | 0.19057772  | 0.349427669 |
| 201765_s_at | 0.036860563 | 0.985841906 | 0.328266085 | 0.51078852  |
| 201766_at   | -0.01743107 | -0.43482893 | 0.665284685 | 0.79835753  |
| 201767_s_at | 0.002124797 | 0.051415202 | 0.959169634 | 0.979083418 |
| 201768_s_at | -0.12539441 | -3.84070575 | 0.000303859 | 0.001883506 |
| 201769_at   | -0.11645553 | -2.36088609 | 0.021579795 | 0.065514855 |
| 201770_at   | -0.08190306 | -2.60148634 | 0.011734863 | 0.03973441  |
| 201771_at   | 0.013627388 | 0.347221829 | 0.729669346 | 0.842375313 |
| 201772_at   | 0.23599117  | 2.468018248 | 0.016527233 | 0.052676873 |
| 201773_at   | 0.178500603 | 2.452148763 | 0.017201289 | 0.05448667  |
| 201774_s_at | 0.105248272 | 2.089034088 | 0.041059531 | 0.109202128 |
| 201775_s_at | 0.133324293 | 3.534755698 | 0.000804585 | 0.004249292 |
| 201776_s_at | 0.202225516 | 2.496091089 | 0.015392886 | 0.049702975 |
| 201777_s_at | 0.092617172 | 2.192305268 | 0.032344313 | 0.090458826 |
| 201778_s_at | 0.267536568 | 6.132533067 | 7.97E-08    | 2.11E-06    |
| 201779_s_at | 0.164697644 | 1.879051065 | 0.065216502 | 0.157005812 |
| 201780_s_at | 0.181854084 | 1.665780427 | 0.101097841 | 0.219397141 |
| 201781_s_at | -0.18134135 | -5.13666496 | 3.35E-06    | 4.33E-05    |
| 201782_s_at | 0.024667377 | 0.613652369 | 0.541821263 | 0.70682378  |
| 201783_s_at | 0.333682606 | 7.051494696 | 2.29E-09    | 1.60E-07    |
| 201784_s_at | -0.24786312 | -2.33839497 | 0.022801399 | 0.068480973 |
| 201785_at   | -0.04937036 | -0.43950949 | 0.661909918 | 0.795773338 |
| 201786_s_at | -0.04491369 | -0.93000446 | 0.356186382 | 0.539323816 |
| 201787_at   | 0.17975446  | 3.068215098 | 0.003259009 | 0.013777112 |
| 201788_at   | 0.033870081 | 0.598764639 | 0.551638836 | 0.714231498 |
| 201789_at   | -0.03093058 | -0.77690819 | 0.440339658 | 0.620827469 |
| 201790_s_at | 0.13224378  | 2.274457266 | 0.02661731  | 0.077421466 |
| 201791_s_at | 0.275303682 | 4.229685814 | 8.33E-05    | 0.000631744 |
| 201792_at   | 1.035503842 | 8.419608141 | 1.13E-11    | 5.95E-09    |
| 201793_x_at | -0.12797161 | -3.18885243 | 0.002294238 | 0.010227838 |
| 201794_s_at | -0.0578432  | -1.22480838 | 0.225550977 | 0.3929819   |
| 201795_at   | 0.428321965 | 5.712586826 | 3.93E-07    | 7.48E-06    |
| 201796_s_at | -0.03908893 | -1.15492306 | 0.252812457 | 0.425755307 |
| 201797_s_at | -0.0680013  | -1.54351791 | 0.128091771 | 0.262251016 |
| 201798_s_at | 0.35639877  | 3.606048631 | 0.00064366  | 0.003542228 |
| 201799_s_at | -0.11298015 | -2.56345524 | 0.012952255 | 0.043054086 |
| 201800_s_at | -0.09386524 | -3.00842424 | 0.003867021 | 0.015944728 |
| 201801_s_at | -0.20103538 | -3.58895011 | 0.000679192 | 0.003702668 |
| 201802_at   | -0.14741789 | -3.58540603 | 0.000686788 | 0.003736782 |
| 201803_at   | 0.01883811  | 0.479262516 | 0.633536647 | 0.776492426 |
| 201804_x_at | 0.066128804 | 1.109255483 | 0.271854141 | 0.447771332 |
| 201805_at   | -0.07209647 | -2.13581124 | 0.036886432 | 0.10031206  |
| 201806_s_at | -0.07117139 | -1.16492091 | 0.248774023 | 0.421128314 |
| 201807_at   | -0.05594504 | -1.20140361 | 0.234430629 | 0.403278433 |
| 201808_s_at | 0.007022961 | 0.13100162  | 0.896222991 | 0.944335681 |
| 201809_s_at | 0.154128114 | 2.22196559  | 0.030162369 | 0.085479809 |
| 201810_s_at | -0.34709639 | -3.6126153  | 0.00063049  | 0.003481328 |
| 201811_x_at | -0.33441458 | -3.8635546  | 0.000282086 | 0.001767414 |
| 201812_s_at | -0.22827744 | -3.63052057 | 0.000595875 | 0.003317658 |
| 201813_s_at | 0.144513005 | 3.887283342 | 0.000261063 | 0.001652612 |
| 201814_at   | 0.124905357 | 3.818827205 | 0.000326215 | 0.001996057 |
| 201815_s_at | -0.06812675 | -1.61658998 | 0.111341217 | 0.236056056 |
| 201816_s_at | -0.00414364 | -0.06023967 | 0.952169846 | 0.975492671 |
| 201817_at   | -0.14372373 | -2.69003945 | 0.009293446 | 0.032895823 |
| 201818_at   | 0.023355423 | 0.35178428  | 0.726262642 | 0.840173552 |
| 201819_at   | -0.28193809 | -5.74140051 | 3.53E-07    | 6.82E-06    |
| 201820_at   | 0.058977931 | 1.241997509 | 0.219188153 | 0.386025588 |
| 201821_s_at | -0.23349386 | -3.29736362 | 0.001662188 | 0.007804842 |

|             |             |             |             |             |
|-------------|-------------|-------------|-------------|-------------|
| 201822_at   | -0.0106701  | -0.36571027 | 0.715898905 | 0.833570952 |
| 201823_s_at | -0.23928682 | -2.26428126 | 0.027274238 | 0.078870285 |
| 201824_at   | -0.1213174  | -1.40836258 | 0.164310377 | 0.314558122 |
| 201825_s_at | -0.02579509 | -0.44304622 | 0.659364535 | 0.794066434 |
| 201826_s_at | 0.118795724 | 2.147701045 | 0.035886665 | 0.098190696 |
| 201827_at   | 0.210185263 | 5.000987887 | 5.50E-06    | 6.51E-05    |
| 201828_x_at | -0.2141784  | -5.2572803  | 2.15E-06    | 3.01E-05    |
| 201829_at   | 0.431750869 | 5.867543212 | 2.19E-07    | 4.63E-06    |
| 201830_s_at | 0.240943396 | 2.91350253  | 0.005053003 | 0.019891555 |
| 201831_s_at | -0.11500897 | -2.47086345 | 0.01640893  | 0.052359553 |
| 201832_s_at | -0.15921261 | -2.36643111 | 0.021287743 | 0.064808706 |
| 201833_at   | -0.18878524 | -4.08901534 | 0.000133912 | 0.000942639 |
| 201834_at   | 0.12599695  | 3.079359254 | 0.003156059 | 0.013402753 |
| 201835_s_at | -0.06645299 | -1.91176737 | 0.060802386 | 0.148596283 |
| 201836_s_at | 0.00321886  | 0.044538207 | 0.964626909 | 0.981917909 |
| 201837_s_at | -0.22178596 | -3.8073236  | 0.000338594 | 0.002058837 |
| 201838_s_at | -0.11855024 | -3.45332099 | 0.001035157 | 0.005246456 |
| 201839_s_at | -0.50338879 | -6.69541495 | 9.12E-09    | 4.19E-07    |
| 201840_at   | -0.28150274 | -4.63002798 | 2.08E-05    | 0.000197493 |
| 201841_s_at | 0.960883601 | 4.540369702 | 2.85E-05    | 0.000256749 |
| 201842_s_at | 0.536053182 | 4.364072984 | 5.26E-05    | 0.000430218 |
| 201843_s_at | 0.852004815 | 5.465456231 | 9.94E-07    | 1.59E-05    |
| 201844_s_at | 0.156162846 | 2.316704002 | 0.024037534 | 0.071476079 |
| 201845_s_at | 0.302189214 | 3.166424348 | 0.002450388 | 0.010809667 |
| 201846_s_at | 0.148678277 | 2.38737409  | 0.02021629  | 0.062135095 |
| 201847_at   | 0.081455009 | 0.73211581  | 0.467017613 | 0.644335232 |
| 201848_s_at | -0.23741276 | -2.80306587 | 0.006853511 | 0.025588732 |
| 201849_at   | 0.098606941 | 1.335870467 | 0.186759637 | 0.344675491 |
| 201850_at   | 0.364111321 | 4.247137116 | 7.85E-05    | 0.000601334 |
| 201851_at   | 0.000550864 | 0.014794846 | 0.988246137 | 0.994563794 |
| 201852_x_at | -0.03540345 | -0.64317945 | 0.522618084 | 0.691440124 |
| 201853_s_at | 0.03807404  | 0.745771834 | 0.458788129 | 0.637399091 |
| 201854_s_at | -0.02058561 | -0.42066355 | 0.675540386 | 0.805100025 |
| 201855_s_at | -0.03846675 | -0.57937045 | 0.564561227 | 0.725039378 |
| 201856_s_at | -0.08743483 | -1.54713958 | 0.127216678 | 0.260990677 |
| 201857_at   | -0.00206753 | -0.04177556 | 0.966819715 | 0.983186527 |
| 201858_s_at | 0.151001196 | 0.927126197 | 0.357666091 | 0.540666766 |
| 201859_at   | 0.279521462 | 1.588165857 | 0.117633441 | 0.246021665 |
| 201860_s_at | 0.123101895 | 1.355797212 | 0.180368735 | 0.336620016 |
| 201861_s_at | 0.058149493 | 1.664183023 | 0.101417954 | 0.220027729 |
| 201862_s_at | 0.301399177 | 2.991720253 | 0.004054887 | 0.016577113 |
| 201863_at   | -0.0414584  | -1.2113563  | 0.230624052 | 0.398763694 |
| 201864_at   | -0.12979017 | -2.80828313 | 0.006756611 | 0.025288206 |
| 201865_x_at | 0.220941079 | 3.218810304 | 0.00210021  | 0.009494498 |
| 201866_s_at | 0.007479058 | 0.183041426 | 0.855397705 | 0.920856171 |
| 201867_s_at | 0.258219341 | 3.114143869 | 0.002853939 | 0.01231874  |
| 201868_s_at | 0.087977459 | 2.269469423 | 0.026937536 | 0.078113961 |
| 201869_s_at | 0.098683296 | 2.620704076 | 0.011160141 | 0.038117617 |
| 201870_at   | -0.43116064 | -6.51367596 | 1.84E-08    | 6.97E-07    |
| 201871_s_at | 0.160497526 | 3.960246746 | 0.000205445 | 0.001346097 |
| 201872_s_at | -0.11941972 | -1.56845721 | 0.122162079 | 0.25297018  |
| 201873_s_at | -0.19414879 | -2.56652949 | 0.012849747 | 0.042786537 |
| 201874_at   | 0.152304387 | 2.921425633 | 0.004942387 | 0.019536987 |
| 201875_s_at | 0.107346156 | 2.636971669 | 0.010693814 | 0.03680332  |
| 201876_at   | 0.468573145 | 4.625455784 | 2.11E-05    | 0.000200154 |
| 201877_s_at | -0.27765252 | -2.97136621 | 0.004295283 | 0.017405457 |
| 201878_at   | -0.09719868 | -2.14467243 | 0.036139053 | 0.098739759 |
| 201879_at   | 0.088418809 | 2.343965908 | 0.022493204 | 0.067706058 |
| 201880_at   | 0.115778253 | 2.059715569 | 0.04387935  | 0.115179078 |
| 201881_s_at | -0.11187626 | -2.68634787 | 0.009385144 | 0.033165246 |
| 201882_x_at | 0.016890426 | 0.393696655 | 0.695234715 | 0.819424614 |
| 201883_s_at | 0.125799605 | 2.859379414 | 0.005872185 | 0.022488405 |
| 201884_at   | 0.160145581 | 3.408048776 | 0.001189178 | 0.005889487 |
| 201885_s_at | 0.210647438 | 4.423707434 | 4.28E-05    | 0.000361726 |
| 201886_at   | -0.04196803 | -1.71701947 | 0.091260202 | 0.203107461 |
| 201887_at   | 0.542372784 | 5.037863564 | 4.81E-06    | 5.83E-05    |
| 201888_s_at | 0.040826656 | 0.806315653 | 0.423322975 | 0.604989425 |
| 201889_at   | -0.58841746 | -4.69824123 | 1.63E-05    | 0.00016112  |
| 201890_at   | 0.033427309 | 1.076828235 | 0.285972745 | 0.463824857 |
| 201891_s_at | 0.138138317 | 1.631708115 | 0.108107175 | 0.230973615 |
| 201892_s_at | 0.097049145 | 1.861326755 | 0.067719106 | 0.161680767 |
| 201893_x_at | 0.224340444 | 2.58115582  | 0.01237206  | 0.041477168 |
| 201894_s_at | 0.084934462 | 1.967368705 | 0.05388295  | 0.135273385 |
| 201895_at   | 0.18422244  | 6.795391172 | 6.19E-09    | 3.20E-07    |
| 201896_s_at | 0.587730019 | 5.036583287 | 4.83E-06    | 5.86E-05    |

|             |             |             |             |             |
|-------------|-------------|-------------|-------------|-------------|
| 201897_s_at | -0.00851046 | -0.16070937 | 0.87287537  | 0.931550637 |
| 201898_s_at | -0.13509464 | -2.10873584 | 0.039254307 | 0.105252788 |
| 201899_s_at | -0.08767456 | -1.64123912 | 0.106107809 | 0.227649667 |
| 201900_s_at | -0.18862003 | -4.00286867 | 0.000178436 | 0.00119668  |
| 201901_s_at | 0.120958201 | 2.047496671 | 0.045103183 | 0.117708115 |
| 201902_s_at | -0.07801417 | -2.11530875 | 0.038667619 | 0.104029209 |
| 201903_at   | -0.19630261 | -2.58349013 | 0.012297334 | 0.041288591 |
| 201904_s_at | 0.141429246 | 2.318314883 | 0.023943724 | 0.071251077 |
| 201905_s_at | -0.02993952 | -0.84155741 | 0.403458942 | 0.585796012 |
| 201906_s_at | 0.117563791 | 1.914804356 | 0.06040582  | 0.147877788 |
| 201907_x_at | 0.014006172 | 0.400520589 | 0.69023046  | 0.815604138 |
| 201908_at   | 0.121757566 | 2.76157379  | 0.00767094  | 0.028073177 |
| 201909_at   | -0.0155145  | -0.08531203 | 0.932304306 | 0.964883034 |
| 201910_at   | 0.314053839 | 6.198897268 | 6.18E-08    | 1.74E-06    |
| 201911_s_at | 0.160981215 | 2.878313435 | 0.005572574 | 0.021549665 |
| 201912_s_at | -0.04774429 | -0.76321919 | 0.448396199 | 0.6279289   |
| 201913_s_at | 0.005418701 | 0.116053692 | 0.908007016 | 0.95123531  |
| 201914_s_at | 0.011277862 | 0.182877285 | 0.855525912 | 0.920863275 |
| 201915_at   | -0.02514235 | -0.68683775 | 0.494895665 | 0.668322792 |
| 201916_s_at | -0.00854695 | -0.11916599 | 0.90555167  | 0.949932289 |
| 201917_s_at | 0.345827159 | 4.799548336 | 1.14E-05    | 0.000118758 |
| 201918_at   | 0.360875449 | 5.004682711 | 5.43E-06    | 6.44E-05    |
| 201919_at   | 0.097287238 | 3.095137525 | 0.003015489 | 0.012903535 |
| 201920_at   | 0.036444208 | 0.464609374 | 0.643933878 | 0.783669441 |
| 201921_at   | -0.18152996 | -2.47228994 | 0.016349904 | 0.0521964   |
| 201922_at   | -0.33464335 | -4.83127981 | 1.02E-05    | 0.000108124 |
| 201923_at   | -0.06496211 | -0.58120392 | 0.563333215 | 0.724128165 |
| 201924_at   | 0.726289627 | 6.859544996 | 4.83E-09    | 2.72E-07    |
| 201925_s_at | 0.211345847 | 1.943778424 | 0.056731794 | 0.140796164 |
| 201926_s_at | 0.160983496 | 1.930100713 | 0.058441719 | 0.143980887 |
| 201927_s_at | 0.169346751 | 1.640446604 | 0.106272905 | 0.22788361  |
| 201928_at   | 0.402083052 | 4.246577767 | 7.86E-05    | 0.000602377 |
| 201929_s_at | 0.285248456 | 2.875761479 | 0.005612114 | 0.021670413 |
| 201930_at   | 0.133659756 | 2.378134771 | 0.020682884 | 0.063255968 |
| 201931_at   | -0.08905526 | -1.12311256 | 0.265972632 | 0.441185053 |
| 201932_at   | 0.039321951 | 1.083537902 | 0.28301045  | 0.460407071 |
| 201933_at   | 0.090578258 | 2.507250744 | 0.014961829 | 0.048486262 |
| 201934_at   | -0.13961679 | -3.23086175 | 0.002026599 | 0.009211102 |
| 201935_s_at | -0.02132462 | -0.37714122 | 0.707431814 | 0.827643747 |
| 201936_s_at | 0.005135463 | 0.174732566 | 0.861892433 | 0.924798248 |
| 201937_s_at | -0.03383732 | -1.02797101 | 0.308190418 | 0.488652434 |
| 201938_at   | 0.430300885 | 5.048801504 | 4.62E-06    | 5.66E-05    |
| 201939_at   | -1.50968416 | -7.07930025 | 2.06E-09    | 1.49E-07    |
| 201940_at   | -0.11937474 | -1.54001718 | 0.128942197 | 0.263569551 |
| 201941_at   | 0.059225505 | 0.927950241 | 0.357242046 | 0.540343296 |
| 201942_s_at | -0.14815197 | -2.44412647 | 0.017551362 | 0.055419349 |
| 201943_s_at | -0.14148465 | -2.02631397 | 0.047294824 | 0.12210157  |
| 201944_at   | -0.27419407 | -3.43109178 | 0.001108254 | 0.005548461 |
| 201945_at   | -0.04019169 | -0.7027139  | 0.485017948 | 0.659880731 |
| 201946_s_at | -0.45006614 | -4.13203976 | 0.000115904 | 0.000834945 |
| 201947_s_at | -0.13291419 | -1.71050706 | 0.092465022 | 0.205124927 |
| 201948_at   | 0.102858611 | 2.858196416 | 0.00589139  | 0.02254843  |
| 201949_x_at | 0.098022677 | 2.453574995 | 0.017139714 | 0.054326814 |
| 201950_x_at | -0.06470636 | -1.26091524 | 0.212339382 | 0.377420921 |
| 201951_at   | -0.00043886 | -0.00637537 | 0.994934894 | 0.997603667 |
| 201952_at   | -0.13449903 | -1.77058683 | 0.081833578 | 0.18680694  |
| 201953_at   | 0.468179096 | 6.786441606 | 6.41E-09    | 3.28E-07    |
| 201954_at   | 0.336418465 | 3.903238438 | 0.000247784 | 0.00158222  |
| 201955_at   | -0.26138766 | -2.9522888  | 0.004532573 | 0.018208385 |
| 201956_s_at | 0.115552537 | 2.334573653 | 0.023014972 | 0.069004772 |
| 201957_at   | -0.01315812 | -0.36064559 | 0.719661958 | 0.835838525 |
| 201958_s_at | -0.0934769  | -2.2053665  | 0.03136693  | 0.088222204 |
| 201959_s_at | -0.23720678 | -4.01045842 | 0.000174    | 0.001171678 |
| 201960_s_at | -0.18308712 | -2.68371083 | 0.009451154 | 0.033343147 |
| 201961_s_at | -0.17350865 | -3.97446767 | 0.000196023 | 0.001294995 |
| 201962_s_at | -0.6491226  | -6.24962319 | 5.09E-08    | 1.49E-06    |
| 201963_at   | 0.273294306 | 2.478766751 | 0.016084305 | 0.051526037 |
| 201964_at   | 0.09567213  | 1.850009795 | 0.069359034 | 0.164602482 |
| 201965_s_at | 0.204963748 | 3.439513006 | 0.001080004 | 0.005429714 |
| 201966_at   | -0.14709115 | -2.68026063 | 0.00953816  | 0.033570598 |
| 201967_at   | 0.448812466 | 6.00572234  | 1.29E-07    | 3.09E-06    |
| 201968_s_at | 0.264630507 | 3.608829213 | 0.000638051 | 0.00351526  |
| 201969_at   | 0.23267968  | 4.148439745 | 0.000109676 | 0.000795852 |
| 201970_s_at | 0.391301491 | 5.173877189 | 2.93E-06    | 3.87E-05    |
| 201971_s_at | -0.69758019 | -4.39962082 | 4.65E-05    | 0.000387474 |

|             |             |             |             |             |
|-------------|-------------|-------------|-------------|-------------|
| 201972_at   | -0.38375466 | -4.19108314 | 9.50E-05    | 0.000704857 |
| 201973_s_at | 0.010448241 | 0.141634491 | 0.887854804 | 0.939750068 |
| 201974_s_at | -0.00842787 | -0.23736343 | 0.813203237 | 0.895098369 |
| 201975_at   | 0.011876361 | 0.173505399 | 0.862852487 | 0.925406238 |
| 201976_s_at | 0.570022684 | 7.000514888 | 2.79E-09    | 1.82E-07    |
| 201977_s_at | -0.02424421 | -0.67168811 | 0.504423268 | 0.676357886 |
| 201978_s_at | 0.064402747 | 1.928794915 | 0.058607237 | 0.14426144  |
| 201979_s_at | -0.07787109 | -2.21869331 | 0.030396553 | 0.085985363 |
| 201980_s_at | 0.112945981 | 2.034132613 | 0.046475406 | 0.120466237 |
| 201981_at   | -0.00050868 | -0.01778711 | 0.985869149 | 0.993167574 |
| 201982_s_at | 0.009534302 | 0.223796485 | 0.823694511 | 0.902029554 |
| 201983_s_at | 0.418495497 | 3.793682966 | 0.000353858 | 0.002135954 |
| 201984_s_at | 0.120307536 | 2.087455035 | 0.041207291 | 0.109472482 |
| 201985_at   | -0.00345435 | -0.05440325 | 0.956799049 | 0.97789204  |
| 201986_at   | 0.291142115 | 5.475391718 | 9.58E-07    | 1.54E-05    |
| 201987_at   | 0.329049261 | 4.119427331 | 0.000120925 | 0.000866229 |
| 201988_s_at | -0.32128865 | -6.01290894 | 1.26E-07    | 3.03E-06    |
| 201989_s_at | -0.17789479 | -3.66619785 | 0.000532235 | 0.003018993 |
| 201990_s_at | -0.14435004 | -1.93407271 | 0.057940691 | 0.143073394 |
| 201991_s_at | 0.389812137 | 5.594887098 | 6.13E-07    | 1.07E-05    |
| 201992_s_at | 0.071349989 | 1.398735308 | 0.167165832 | 0.318632462 |
| 201993_x_at | -0.02251578 | -0.36140126 | 0.719100048 | 0.835648124 |
| 201994_at   | -0.14821991 | -2.42027898 | 0.01863014  | 0.058147791 |
| 201995_at   | 0.134724368 | 3.07303571  | 0.003214097 | 0.013615583 |
| 201996_s_at | 0.682714428 | 7.215491887 | 1.21E-09    | 1.07E-07    |
| 201997_s_at | 0.418988419 | 8.031253674 | 5.09E-11    | 1.42E-08    |
| 201998_at   | 0.203608466 | 2.144937007 | 0.036116943 | 0.098687847 |
| 201999_s_at | 0.594117781 | 5.901398761 | 1.93E-07    | 4.20E-06    |
| 202000_at   | -0.16903786 | -3.28824588 | 0.00170821  | 0.00798988  |
| 202001_s_at | -0.17552753 | -2.36285334 | 0.021475774 | 0.065256683 |
| 202002_at   | -0.06275342 | -1.08255419 | 0.283443418 | 0.460928781 |
| 202003_s_at | 0.209088572 | 3.58629761  | 0.00068487  | 0.00372802  |
| 202004_x_at | 0.032251111 | 0.600878948 | 0.550239129 | 0.7131837   |
| 202005_at   | 0.009814812 | 0.211511685 | 0.833222327 | 0.907684292 |
| 202006_at   | 0.298673415 | 4.087277634 | 0.000134694 | 0.000947394 |
| 202007_at   | 0.036321023 | 0.752331086 | 0.454865175 | 0.633869676 |
| 202008_s_at | -0.11673493 | -2.15127138 | 0.035591114 | 0.097543268 |
| 202009_at   | -0.09312892 | -1.92658465 | 0.058888312 | 0.144789373 |
| 202010_s_at | 0.159465934 | 5.088622256 | 4.00E-06    | 5.01E-05    |
| 202011_at   | 0.301652828 | 5.424539452 | 1.16E-06    | 1.80E-05    |
| 202012_s_at | 0.076960207 | 1.64591944  | 0.105137064 | 0.226142346 |
| 202013_s_at | 0.078835799 | 1.925312465 | 0.059050612 | 0.145132531 |
| 202014_at   | 0.123358258 | 1.522112344 | 0.133362354 | 0.270243951 |
| 202015_x_at | -0.00971253 | -0.37224778 | 0.711051999 | 0.830285205 |
| 202016_at   | -0.18908473 | -2.4150094  | 0.0188764   | 0.058813725 |
| 202017_at   | 0.408088195 | 3.970698046 | 0.000198479 | 0.001309093 |
| 202018_s_at | 0.836689433 | 3.617353013 | 0.000621149 | 0.003437393 |
| 202019_s_at | -0.26074423 | -4.29225313 | 6.73E-05    | 0.000527412 |
| 202020_s_at | -0.31926612 | -3.22014411 | 0.002091941 | 0.009462859 |
| 202021_x_at | -0.04871016 | -0.93322705 | 0.35453436  | 0.537642076 |
| 202022_at   | 0.048806763 | 0.643577454 | 0.52236171  | 0.691223709 |
| 202023_at   | 0.403996285 | 3.316342128 | 0.001570119 | 0.007444601 |
| 202024_at   | -0.25217012 | -5.23952868 | 2.30E-06    | 3.17E-05    |
| 202025_x_at | 0.117840836 | 3.598519125 | 0.000659083 | 0.003610212 |
| 202026_at   | -0.09456247 | -1.53627354 | 0.129856605 | 0.265017793 |
| 202027_at   | 0.154745691 | 2.700987556 | 0.009026296 | 0.032115535 |
| 202028_s_at | 0.03027754  | 0.688635018 | 0.493771942 | 0.667361891 |
| 202029_x_at | -0.07342684 | -2.18327453 | 0.033035646 | 0.09200655  |
| 202030_at   | 0.064636735 | 1.966582177 | 0.053975922 | 0.135468744 |
| 202031_s_at | -0.04481084 | -0.87988632 | 0.382517137 | 0.56519509  |
| 202032_s_at | -0.04440015 | -0.8138473  | 0.419029094 | 0.601369521 |
| 202033_s_at | -0.16534028 | -2.28945706 | 0.025674534 | 0.075276093 |
| 202034_x_at | -0.07235628 | -1.20074752 | 0.234683157 | 0.403541982 |
| 202035_s_at | 0.063626741 | 2.050169117 | 0.04483302  | 0.11714671  |
| 202036_s_at | 0.08941594  | 0.944930248 | 0.348576676 | 0.531638017 |
| 202037_s_at | 0.164517347 | 1.677451132 | 0.098784056 | 0.215537619 |
| 202038_at   | 0.116875957 | 1.640731122 | 0.106213611 | 0.227821976 |
| 202039_at   | 0.231873062 | 4.551928882 | 2.74E-05    | 0.000248506 |
| 202040_s_at | 0.408916883 | 5.178143238 | 2.88E-06    | 3.82E-05    |
| 202041_s_at | -0.1823162  | -2.73854683 | 0.00816237  | 0.029573784 |
| 202042_at   | -0.33231618 | -4.57409939 | 2.53E-05    | 0.000233077 |
| 202043_s_at | 0.046362651 | 0.69125841  | 0.492134214 | 0.66604132  |
| 202044_at   | 0.035128711 | 0.87797642  | 0.383544199 | 0.566188517 |
| 202045_s_at | 0.024026693 | 0.442889286 | 0.659477397 | 0.794066434 |
| 202046_s_at | -0.10731679 | -2.33708322 | 0.022874513 | 0.068656585 |

|             |             |             |             |             |
|-------------|-------------|-------------|-------------|-------------|
| 202047_s_at | -0.39146156 | -5.76405731 | 3.24E-07    | 6.37E-06    |
| 202048_s_at | -0.26480528 | -4.88646803 | 8.32E-06    | 9.16E-05    |
| 202049_s_at | -0.02129217 | -0.60570205 | 0.547052883 | 0.710723473 |
| 202050_s_at | -0.17113146 | -4.06984517 | 0.000142781 | 0.000993794 |
| 202051_s_at | -0.24793015 | -4.69079575 | 1.68E-05    | 0.000164332 |
| 202052_s_at | 0.285096656 | 4.827232314 | 1.03E-05    | 0.000109471 |
| 202053_s_at | -0.21953602 | -3.94306952 | 0.000217408 | 0.001414939 |
| 202054_s_at | -0.04322165 | -0.89545805 | 0.374207974 | 0.55728433  |
| 202055_at   | -0.00199237 | -0.03871842 | 0.969246567 | 0.984467798 |
| 202056_at   | -0.11205961 | -2.24341846 | 0.028666089 | 0.082119406 |
| 202057_at   | 0.051283828 | 1.504823788 | 0.137743695 | 0.276710323 |
| 202058_s_at | -0.16516805 | -2.83236732 | 0.006325457 | 0.02393914  |
| 202059_s_at | -0.06811351 | -2.17476817 | 0.033698668 | 0.093451282 |
| 202060_at   | 0.058576539 | 0.813645677 | 0.4191437   | 0.601476054 |
| 202061_s_at | -0.11304758 | -1.79449509 | 0.077895588 | 0.179801138 |
| 202062_s_at | -0.04312956 | -1.17337101 | 0.245397028 | 0.416753457 |
| 202063_s_at | -0.01851186 | -0.60683731 | 0.546304272 | 0.710287733 |
| 202064_s_at | -0.08498768 | -1.94926933 | 0.056057456 | 0.13950219  |
| 202065_s_at | 0.212240017 | 3.932916987 | 0.000224791 | 0.001457472 |
| 202066_at   | 0.566056865 | 6.064433607 | 1.03E-07    | 2.59E-06    |
| 202067_s_at | 0.028021858 | 0.609374306 | 0.544633212 | 0.709022648 |
| 202068_s_at | 0.496726743 | 5.021306311 | 5.11E-06    | 6.13E-05    |
| 202069_s_at | -0.42897481 | -4.21827452 | 8.66E-05    | 0.000652737 |
| 202070_s_at | -0.16203077 | -3.08983979 | 0.00306202  | 0.013067972 |
| 202071_at   | 0.791587882 | 6.248071223 | 5.12E-08    | 1.50E-06    |
| 202072_at   | -0.09238952 | -1.98511982 | 0.051820841 | 0.131135101 |
| 202073_at   | -0.19468423 | -2.75122119 | 0.007888415 | 0.028753692 |
| 202074_s_at | -0.04355645 | -0.82717944 | 0.411493035 | 0.593719022 |
| 202075_s_at | 0.651382279 | 4.735926447 | 1.43E-05    | 0.000143593 |
| 202076_at   | 0.262059996 | 3.773686139 | 0.000377432 | 0.002256913 |
| 202077_at   | -0.42897725 | -4.30758658 | 6.38E-05    | 0.000504408 |
| 202078_at   | -0.37427259 | -5.55625162 | 7.08E-07    | 1.20E-05    |
| 202079_s_at | 0.02461372  | 0.492365534 | 0.62430169  | 0.769580354 |
| 202080_s_at | 0.08641597  | 1.97206062  | 0.053331181 | 0.134143322 |
| 202081_at   | 0.268294715 | 2.790440556 | 0.007093323 | 0.026334861 |
| 202082_s_at | -0.03331253 | -0.46402143 | 0.64435257  | 0.784008197 |
| 202083_s_at | -0.13136919 | -2.2809146  | 0.026207753 | 0.076554046 |
| 202084_s_at | -0.24445595 | -4.50368779 | 3.24E-05    | 0.00028557  |
| 202085_at   | 0.693368587 | 4.201498723 | 9.17E-05    | 0.000684736 |
| 202086_at   | 0.156749928 | 2.271665437 | 0.026796131 | 0.077830162 |
| 202087_s_at | 0.164375945 | 3.745620169 | 0.00041307  | 0.002437732 |
| 202088_at   | 0.141382887 | 1.475936757 | 0.145317454 | 0.287565672 |
| 202089_s_at | -0.13798633 | -1.15012032 | 0.254769    | 0.42801805  |
| 202090_s_at | -0.10780308 | -1.84027296 | 0.070796641 | 0.16704733  |
| 202091_at   | -0.01200995 | -0.30161933 | 0.764010673 | 0.864325149 |
| 202092_s_at | -0.04944002 | -1.1035482  | 0.274302916 | 0.450554813 |
| 202093_s_at | 0.249074961 | 4.847167322 | 9.59E-06    | 0.000103138 |
| 202094_at   | -0.00701257 | -0.14210796 | 0.887482472 | 0.939533984 |
| 202095_s_at | -0.05986218 | -1.6517092  | 0.103946227 | 0.224260911 |
| 202096_s_at | 0.394885208 | 5.753076961 | 3.38E-07    | 6.60E-06    |
| 202097_at   | 0.177762196 | 2.453681795 | 0.017135111 | 0.054316077 |
| 202098_s_at | 0.239591325 | 5.503534099 | 8.62E-07    | 1.42E-05    |
| 202099_s_at | -0.03677158 | -0.97050461 | 0.335786182 | 0.518625797 |
| 202100_at   | -0.11331982 | -3.48830224 | 0.00092932  | 0.004795424 |
| 202101_s_at | -0.09784031 | -2.40435449 | 0.019383269 | 0.060108039 |
| 202102_s_at | 0.042557212 | 0.855059297 | 0.396002783 | 0.578688908 |
| 202103_at   | 0.154164759 | 4.004749791 | 0.000177327 | 0.001190311 |
| 202104_s_at | -0.01422156 | -0.209997   | 0.834398854 | 0.908737537 |
| 202105_at   | -0.09665017 | -2.53648245 | 0.013883944 | 0.045587205 |
| 202106_at   | 0.076633987 | 1.312226714 | 0.194563516 | 0.354655056 |
| 202107_s_at | 0.106688281 | 2.371735606 | 0.021011669 | 0.06409484  |
| 202108_at   | 0.117814363 | 3.479600609 | 0.000954643 | 0.004905702 |
| 202109_at   | -0.03787767 | -1.25665134 | 0.213869029 | 0.379400415 |
| 202110_at   | -0.24071491 | -3.48635434 | 0.000934932 | 0.004818338 |
| 202111_at   | 0.134021855 | 3.351539584 | 0.001411977 | 0.006813221 |
| 202112_at   | 0.572007817 | 4.320114884 | 6.12E-05    | 0.000486806 |
| 202113_s_at | -0.1491541  | -1.18176801 | 0.242074052 | 0.412583844 |
| 202114_at   | 0.038491391 | 1.011251144 | 0.316056006 | 0.497260263 |
| 202115_s_at | -0.11383849 | -2.50122731 | 0.015193118 | 0.049157376 |
| 202116_at   | 0.265478019 | 4.446744506 | 3.95E-05    | 0.000338802 |
| 202117_at   | 0.244318817 | 4.980108222 | 5.93E-06    | 6.92E-05    |
| 202118_s_at | 0.514146108 | 5.057704119 | 4.48E-06    | 5.51E-05    |
| 202119_s_at | 0.319915647 | 3.877696867 | 0.000269368 | 0.001696057 |
| 202120_x_at | -0.13495047 | -2.66722243 | 0.009873609 | 0.034535922 |
| 202121_s_at | -0.06528439 | -0.88029866 | 0.382295622 | 0.565017227 |

|             |             |             |             |             |
|-------------|-------------|-------------|-------------|-------------|
| 202122_s_at | 0.304636669 | 6.573782593 | 1.46E-08    | 5.92E-07    |
| 202123_s_at | 0.397156352 | 6.848091521 | 5.05E-09    | 2.80E-07    |
| 202124_s_at | 0.031592886 | 0.417423324 | 0.6778951   | 0.80684201  |
| 202125_s_at | 0.195100373 | 2.679269622 | 0.009563286 | 0.033648432 |
| 202126_at   | 0.156833872 | 2.048558496 | 0.044995673 | 0.117475559 |
| 202127_at   | 0.209530604 | 2.569527945 | 0.012750477 | 0.042519348 |
| 202128_at   | -0.26353746 | -3.28513955 | 0.001724162 | 0.008052694 |
| 202129_s_at | -0.0144726  | -0.24826074 | 0.804801115 | 0.890061473 |
| 202130_at   | 0.292475639 | 3.771717231 | 0.000379832 | 0.002269144 |
| 202131_s_at | 0.045582897 | 0.832269027 | 0.408638012 | 0.590829338 |
| 202132_at   | 0.317559407 | 4.044488564 | 0.000155386 | 0.00106478  |
| 202133_at   | 0.985895269 | 5.289013582 | 1.91E-06    | 2.73E-05    |
| 202134_s_at | 0.043285706 | 0.951552211 | 0.345234744 | 0.528217431 |
| 202135_s_at | -0.15436813 | -3.44725892 | 0.001054624 | 0.005327599 |
| 202136_at   | 0.096262779 | 2.236972223 | 0.029108655 | 0.083126134 |
| 202137_s_at | -0.19095101 | -2.16169877 | 0.034740098 | 0.095721605 |
| 202138_x_at | -0.04254563 | -0.75202347 | 0.455048718 | 0.634066137 |
| 202139_at   | 0.307358225 | 2.943224738 | 0.004649531 | 0.018578172 |
| 202140_s_at | 0.079918543 | 1.46993681  | 0.146930853 | 0.289847166 |
| 202141_s_at | -0.15161061 | -3.11289601 | 0.002864292 | 0.012345619 |
| 202142_at   | -0.12949099 | -3.64171152 | 0.000575169 | 0.003225683 |
| 202143_s_at | -0.39883151 | -4.87037266 | 8.82E-06    | 9.62E-05    |
| 202144_s_at | -0.04726345 | -0.8962736  | 0.373775968 | 0.556863643 |
| 202145_at   | -0.43499388 | -6.82893266 | 5.44E-09    | 2.94E-07    |
| 202146_at   | 0.578709665 | 5.505027647 | 8.58E-07    | 1.41E-05    |
| 202147_s_at | 0.302851063 | 4.244962137 | 7.91E-05    | 0.000605079 |
| 202148_s_at | -0.02954947 | -0.88142803 | 0.381689332 | 0.564419801 |
| 202149_at   | 0.168556336 | 1.608045311 | 0.113203445 | 0.238893586 |
| 202150_s_at | 0.020028853 | 0.385844528 | 0.701009869 | 0.823381293 |
| 202151_s_at | 0.093694028 | 2.281798688 | 0.026152116 | 0.076451491 |
| 202152_x_at | 0.014592412 | 0.380126447 | 0.70522666  | 0.826246173 |
| 202153_s_at | 0.165071003 | 3.336298274 | 0.001478513 | 0.007083801 |
| 202154_x_at | -0.28293065 | -3.24942734 | 0.001917934 | 0.008801344 |
| 202155_s_at | 0.168344205 | 4.693017337 | 1.66E-05    | 0.000163262 |
| 202156_s_at | -0.17091985 | -2.69354382 | 0.009207157 | 0.032657639 |
| 202157_s_at | -0.25104121 | -3.79735706 | 0.000349683 | 0.002115039 |
| 202158_s_at | -0.01010487 | -0.22402898 | 0.823514445 | 0.901901723 |
| 202159_at   | 0.015641704 | 0.418959595 | 0.676778268 | 0.806059438 |
| 202160_at   | 0.282354275 | 4.630909748 | 2.07E-05    | 0.000197005 |
| 202161_at   | 0.059956074 | 1.222049645 | 0.226584639 | 0.394058708 |
| 202162_s_at | 0.088851208 | 1.530154297 | 0.131362378 | 0.267325685 |
| 202163_s_at | 0.15223028  | 3.35132816  | 0.00141288  | 0.006816108 |
| 202164_s_at | 0.050261348 | 0.539342597 | 0.591695098 | 0.745416253 |
| 202165_at   | -0.2430843  | -3.49354232 | 0.00091438  | 0.004732539 |
| 202166_s_at | -0.35662985 | -3.42806007 | 0.001118594 | 0.005591969 |
| 202167_s_at | -0.01254101 | -0.28693088 | 0.77517795  | 0.871226888 |
| 202168_at   | -0.55704851 | -5.77861733 | 3.07E-07    | 6.09E-06    |
| 202169_s_at | -0.45962913 | -5.21900033 | 2.48E-06    | 3.38E-05    |
| 202170_s_at | -0.42821697 | -4.81057946 | 1.09E-05    | 0.000114894 |
| 202171_at   | 0.494926318 | 5.113081385 | 3.66E-06    | 4.67E-05    |
| 202172_at   | 0.609636182 | 7.337200116 | 7.55E-10    | 7.77E-08    |
| 202173_s_at | 0.724216693 | 6.756004307 | 7.22E-09    | 3.56E-07    |
| 202174_s_at | 0.090898738 | 1.652038321 | 0.103878864 | 0.224158862 |
| 202175_at   | -0.06950904 | -2.04377968 | 0.045481282 | 0.118459668 |
| 202176_at   | -0.0605872  | -0.91525876 | 0.363808957 | 0.546974026 |
| 202177_at   | 0.150284918 | 3.587067359 | 0.000683217 | 0.003720526 |
| 202178_at   | -0.6794797  | -6.53370143 | 1.71E-08    | 6.59E-07    |
| 202179_at   | -0.09141111 | -2.81713923 | 0.006595014 | 0.024779176 |
| 202180_s_at | 0.226323725 | 3.444508177 | 0.001063572 | 0.005364309 |
| 202181_at   | 0.302779141 | 3.505099528 | 0.000882232 | 0.004593281 |
| 202182_at   | 0.108097381 | 1.972029637 | 0.053334808 | 0.134143322 |
| 202183_s_at | -0.00569107 | -0.17771214 | 0.859562285 | 0.923494176 |
| 202184_s_at | 0.106402383 | 1.661555039 | 0.101946392 | 0.220906093 |
| 202185_at   | 0.233275352 | 3.89758814  | 0.000252411 | 0.001606041 |
| 202186_x_at | -0.01820005 | -0.44105334 | 0.660798315 | 0.795057163 |
| 202187_s_at | 0.131277228 | 3.464563155 | 0.000999955 | 0.005094054 |
| 202188_at   | -0.26414498 | -6.2319615  | 5.45E-08    | 1.57E-06    |
| 202189_x_at | 0.485646434 | 7.138977924 | 1.63E-09    | 1.27E-07    |
| 202190_at   | -0.03271507 | -0.84245513 | 0.402960535 | 0.585206512 |
| 202191_s_at | -0.37508203 | -4.66338626 | 1.85E-05    | 0.000178555 |
| 202192_s_at | -0.52759813 | -6.49006526 | 2.02E-08    | 7.42E-07    |
| 202193_at   | 0.551741579 | 4.817164157 | 1.07E-05    | 0.000112585 |
| 202194_at   | 0.181646476 | 2.206437817 | 0.031287927 | 0.088060964 |
| 202195_s_at | 0.010392367 | 0.195650591 | 0.845560897 | 0.915221192 |
| 202196_s_at | -0.85569746 | -6.11839776 | 8.42E-08    | 2.21E-06    |

|             |             |             |             |              |
|-------------|-------------|-------------|-------------|--------------|
| 202197_at   | 0.225968152 | 4.768200561 | 1.27E-05    | 0.000130208  |
| 202198_s_at | 0.054438035 | 1.462225239 | 0.149025109 | 0.292846333  |
| 202199_s_at | -0.10252351 | -1.94069335 | 0.057113701 | 0.141586727  |
| 202200_s_at | -0.25912657 | -5.27248003 | 2.04E-06    | 2.88E-05     |
| 202201_at   | 0.025001065 | 0.568366456 | 0.571959083 | 0.730334125  |
| 202202_s_at | 0.340249897 | 4.945238947 | 6.73E-06    | 7.71E-05     |
| 202203_s_at | -0.01321531 | -0.08521413 | 0.932381797 | 0.964940887  |
| 202204_s_at | 0.037711584 | 0.836913607 | 0.406043203 | 0.588382168  |
| 202205_at   | 0.020800261 | 0.333033595 | 0.740298203 | 0.849294701  |
| 202206_at   | 0.062820336 | 0.895477118 | 0.374197867 | 0.55728433   |
| 202207_at   | 0.247300318 | 3.085646626 | 0.003099325 | 0.013205743  |
| 202208_s_at | 0.251330694 | 4.646638149 | 1.96E-05    | 0.000187865  |
| 202209_at   | -0.13690856 | -2.6011591  | 0.011744878 | 0.039750252  |
| 202210_x_at | -0.10337729 | -2.02665377 | 0.047258954 | 0.122037163  |
| 202211_at   | 0.182220628 | 2.936934004 | 0.004732345 | 0.018851766  |
| 202212_at   | 0.059686188 | 1.621165421 | 0.110354283 | 0.234488343  |
| 202213_s_at | -0.19505073 | -2.77751349 | 0.007346853 | 0.0270797925 |
| 202214_s_at | -0.14009463 | -2.91309831 | 0.005058708 | 0.019903492  |
| 202215_s_at | 0.074340631 | 1.789106533 | 0.078769056 | 0.181395716  |
| 202216_x_at | -0.2081366  | -5.4371111  | 1.11E-06    | 1.73E-05     |
| 202217_at   | 0.029246084 | 0.824892659 | 0.412779756 | 0.595076058  |
| 202218_s_at | 0.356176484 | 4.82544696  | 1.04E-05    | 0.000110043  |
| 202219_at   | 0.347157301 | 5.571766189 | 6.68E-07    | 1.14E-05     |
| 202220_at   | 0.003281481 | 0.055870536 | 0.955635112 | 0.977216438  |
| 202221_s_at | 0.274997943 | 5.242515795 | 2.27E-06    | 3.14E-05     |
| 202222_s_at | 0.106279885 | 2.622659921 | 0.011103111 | 0.037951834  |
| 202223_at   | 0.026750398 | 0.923459818 | 0.359556708 | 0.542680369  |
| 202224_at   | 0.125607504 | 2.439493631 | 0.017756433 | 0.05590887   |
| 202225_at   | 0.127124075 | 2.039292405 | 0.045941384 | 0.119491644  |
| 202226_s_at | -0.03452346 | -0.89097716 | 0.376587183 | 0.559355059  |
| 202227_s_at | 0.259981518 | 3.95176036  | 0.000211273 | 0.001379435  |
| 202228_s_at | -0.78028875 | -6.34613393 | 3.51E-08    | 1.13E-06     |
| 202229_s_at | -0.01847935 | -0.47360987 | 0.63753888  | 0.779196752  |
| 202230_s_at | 0.173396152 | 3.788521503 | 0.000359804 | 0.002166577  |
| 202231_at   | -0.06130147 | -1.01324305 | 0.315111914 | 0.496398529  |
| 202232_s_at | -0.18610529 | -1.77116616 | 0.081736232 | 0.186674285  |
| 202233_s_at | -0.37817102 | -4.91751563 | 7.44E-06    | 8.38E-05     |
| 202234_s_at | 0.329438186 | 4.013545371 | 0.000172227 | 0.001161135  |
| 202235_at   | 0.203266558 | 4.299199059 | 6.57E-05    | 0.000516943  |
| 202236_s_at | 0.057788586 | 0.525041112 | 0.601536641 | 0.752838857  |
| 202237_at   | 0.17035078  | 3.553989967 | 0.000757749 | 0.004057672  |
| 202238_s_at | 0.069522523 | 1.905126018 | 0.061677319 | 0.150290015  |
| 202239_at   | 0.193822323 | 3.463782212 | 0.001002363 | 0.005105142  |
| 202240_at   | -0.01037481 | -0.26755272 | 0.789983623 | 0.880491498  |
| 202241_at   | -0.15323976 | -1.86511278 | 0.067177832 | 0.160669113  |
| 202242_at   | -0.68805571 | -6.32977552 | 3.74E-08    | 1.18E-06     |
| 202243_s_at | -0.11487094 | -1.4742625  | 0.14576626  | 0.288226354  |
| 202244_at   | -0.02296884 | -0.38593965 | 0.700939801 | 0.823360622  |
| 202245_at   | 0.240071399 | 4.397672315 | 4.68E-05    | 0.000389441  |
| 202246_s_at | 0.183779115 | 3.961485539 | 0.000204607 | 0.001341985  |
| 202247_s_at | -0.14869696 | -3.2489578  | 0.001920613 | 0.008808951  |
| 202248_at   | 0.02477665  | 0.497075577 | 0.620996704 | 0.767274584  |
| 202249_s_at | 0.009022521 | 0.282971566 | 0.778196413 | 0.872861189  |
| 202250_s_at | 0.062194026 | 1.235174433 | 0.221697819 | 0.388660375  |
| 202251_at   | 0.274610746 | 4.770900266 | 1.26E-05    | 0.000129128  |
| 202252_at   | 0.745333918 | 6.846006319 | 5.09E-09    | 2.81E-07     |
| 202253_s_at | 0.234949482 | 4.737276104 | 1.42E-05    | 0.000143065  |
| 202254_at   | -0.66341787 | -6.51556671 | 1.83E-08    | 6.94E-07     |
| 202255_s_at | -0.2590048  | -3.35723886 | 0.001387831 | 0.006710479  |
| 202256_at   | 0.067818446 | 1.896521083 | 0.062826812 | 0.152493123  |
| 202257_s_at | -0.05986072 | -1.45824317 | 0.150115644 | 0.294382112  |
| 202258_s_at | 0.21609792  | 2.808114399 | 0.006759725 | 0.025297742  |
| 202259_s_at | 0.175719359 | 1.905735904 | 0.061596529 | 0.150118446  |
| 202260_s_at | -0.75403982 | -6.34771934 | 3.49E-08    | 1.12E-06     |
| 202261_at   | 0.015152534 | 0.497692705 | 0.62056425  | 0.767135714  |
| 202262_x_at | 0.335923966 | 6.6788576   | 9.73E-09    | 4.37E-07     |
| 202263_at   | 0.151422281 | 3.309039192 | 0.001604962 | 0.007582342  |
| 202264_s_at | -0.09328987 | -2.18028309 | 0.033267495 | 0.092480581  |
| 202265_at   | 0.220564364 | 2.840841939 | 0.006179886 | 0.02348434   |
| 202266_at   | -0.11130693 | -1.47788811 | 0.144795741 | 0.286857185  |
| 202267_at   | 0.012110575 | -2.3633735  | 0.021448345 | 0.065195911  |
| 202268_s_at | 0.015155514 | 0.184714533 | 0.854091098 | 0.920135351  |
| 202269_x_at | 0.591855527 | 2.786758261 | 0.007164709 | 0.026548807  |
| 202270_at   | 0.478257682 | 2.945742477 | 0.004616765 | 0.018470368  |
| 202271_at   | -0.16014421 | -2.46069892 | 0.016835109 | 0.053516942  |



|             |             |             |             |             |
|-------------|-------------|-------------|-------------|-------------|
| 202272_s_at | -0.13723405 | -2.91164291 | 0.005079296 | 0.019960667 |
| 202273_at   | 0.252703746 | 4.265389713 | 7.38E-05    | 0.000571031 |
| 202274_at   | -0.00786759 | -0.22444342 | 0.823193487 | 0.901778449 |
| 202275_at   | 0.041440034 | 1.001223169 | 0.320837814 | 0.502677776 |
| 202276_at   | -0.10331059 | -1.58134659 | 0.119184834 | 0.248199459 |
| 202277_at   | 0.082389797 | 1.018662193 | 0.312553065 | 0.493521112 |
| 202278_s_at | -0.17871521 | -3.17535065 | 0.002387082 | 0.010571093 |
| 202279_at   | -0.77126178 | -7.48875514 | 4.19E-10    | 5.20E-08    |
| 202280_at   | -0.0192159  | -0.54298251 | 0.589202458 | 0.74371272  |
| 202281_at   | -0.00727561 | -0.20872454 | 0.835387528 | 0.909061101 |
| 202282_at   | 0.164583075 | 3.604073375 | 0.000647672 | 0.003559925 |
| 202283_at   | 0.050562069 | 0.998568547 | 0.322111738 | 0.504037596 |
| 202284_s_at | 0.197779406 | 1.950938401 | 0.055853839 | 0.139150443 |
| 202285_s_at | -0.02483933 | -0.5701489  | 0.570757562 | 0.729204338 |
| 202286_s_at | 0.016477838 | 0.511347645 | 0.611030169 | 0.759910962 |
| 202287_s_at | -0.01440823 | -0.48812345 | 0.627284969 | 0.771942061 |
| 202288_at   | -0.12281912 | -3.84307982 | 0.000301524 | 0.001871626 |
| 202289_s_at | -0.06842718 | -1.12163113 | 0.266597089 | 0.441909246 |
| 202290_at   | 0.041519955 | 0.748232243 | 0.457314333 | 0.63612775  |
| 202291_s_at | 0.214365563 | 2.102312274 | 0.039835139 | 0.106541712 |
| 202292_x_at | -0.06862285 | -2.19191975 | 0.032373564 | 0.090523638 |
| 202293_at   | 0.151699657 | 3.240121566 | 0.001971696 | 0.009000004 |
| 202294_at   | 0.284295205 | 6.422383735 | 2.62E-08    | 8.96E-07    |
| 202295_s_at | 0.612195788 | 4.880503756 | 8.51E-06    | 9.33E-05    |
| 202296_s_at | -0.08350107 | -0.93341424 | 0.354438549 | 0.537540196 |
| 202297_s_at | 0.106447413 | 2.185089782 | 0.03289565  | 0.09169665  |
| 202298_at   | -0.25998729 | -4.0857492  | 0.000135385 | 0.000951804 |
| 202299_s_at | 0.033682819 | 0.538657524 | 0.592164796 | 0.745769369 |
| 202300_at   | -0.11532937 | -1.54710929 | 0.127223977 | 0.260990677 |
| 202301_s_at | 0.130157398 | 2.46775268  | 0.016538315 | 0.052704675 |
| 202302_s_at | 0.143952334 | 1.95918457  | 0.054857105 | 0.137194949 |
| 202303_x_at | 0.167753478 | 2.752619221 | 0.007858719 | 0.028659476 |
| 202304_at   | -0.08552907 | -1.17162915 | 0.246090432 | 0.417566103 |
| 202305_s_at | 0.222086021 | 4.703354212 | 1.60E-05    | 0.0001589   |
| 202306_at   | 0.20963     | 3.108948445 | 0.002897275 | 0.012461846 |
| 202307_s_at | 0.213655131 | 2.795800103 | 0.006990593 | 0.026014787 |
| 202308_at   | 0.40116625  | 4.456020652 | 3.82E-05    | 0.000330271 |
| 202309_at   | -0.45526195 | -6.6183296  | 1.23E-08    | 5.23E-07    |
| 202310_s_at | 0.12964556  | 1.982825697 | 0.052083476 | 0.131687865 |
| 202311_s_at | 0.013586354 | 0.504246753 | 0.615979817 | 0.763780736 |
| 202312_s_at | -0.01732299 | -0.34629264 | 0.730363831 | 0.842766085 |
| 202313_at   | -0.17825474 | -2.66836299 | 0.00984384  | 0.034459221 |
| 202314_at   | 0.024045394 | 0.31622332  | 0.752957306 | 0.857835421 |
| 202315_s_at | -0.67572482 | -6.70056592 | 8.94E-09    | 4.13E-07    |
| 202316_x_at | -0.18793767 | -2.66682912 | 0.009883893 | 0.034548018 |
| 202317_s_at | -0.03338974 | -0.95608458 | 0.342959492 | 0.525834355 |
| 202318_s_at | 0.13887668  | 1.80528509  | 0.076170874 | 0.176641323 |
| 202319_at   | 9.74E-05    | 0.003062838 | 0.997566622 | 0.998795785 |
| 202320_at   | -0.00541483 | -0.14908428 | 0.881999306 | 0.936880568 |
| 202321_at   | 0.072158996 | 1.935193187 | 0.057800017 | 0.142836515 |
| 202322_s_at | -0.0992502  | -2.77895345 | 0.007318205 | 0.027007863 |
| 202323_s_at | 0.067245725 | 1.42194111  | 0.160347231 | 0.308823031 |
| 202324_s_at | 0.140173357 | 2.623523096 | 0.011078026 | 0.037883477 |
| 202325_s_at | -0.20482849 | -2.52239123 | 0.014394444 | 0.046943703 |
| 202326_at   | -0.22824256 | -3.58627074 | 0.000684927 | 0.00372802  |
| 202327_s_at | -0.10072057 | -2.23259461 | 0.029412627 | 0.083764044 |
| 202328_s_at | -0.01221262 | -0.2657329  | 0.791378133 | 0.881206115 |
| 202329_at   | 0.154100328 | 3.488543306 | 0.000928628 | 0.004793222 |
| 202330_s_at | 0.390697891 | 4.42348802  | 4.28E-05    | 0.000361864 |
| 202331_at   | 0.05953865  | 1.944174219 | 0.056682956 | 0.140726059 |
| 202332_at   | 0.154236427 | 3.407997728 | 0.001189363 | 0.005889752 |
| 202333_s_at | 0.007176608 | 0.130093497 | 0.896938257 | 0.94468844  |
| 202334_s_at | -0.31198261 | -5.50693592 | 8.52E-07    | 1.40E-05    |
| 202335_s_at | -0.05034377 | -2.34110074 | 0.022651244 | 0.068096959 |
| 202336_s_at | -0.6580843  | -6.71919895 | 8.32E-09    | 3.90E-07    |
| 202337_at   | 0.046174533 | 1.201316861 | 0.234464008 | 0.403320328 |
| 202338_at   | -0.05544788 | -1.3030275  | 0.197665279 | 0.358644627 |
| 202339_at   | -0.07225143 | -2.06476934 | 0.043381637 | 0.114121616 |
| 202340_x_at | 0.09017682  | 1.332141164 | 0.187974535 | 0.346131512 |
| 202341_s_at | 0.289151334 | 4.687144497 | 1.70E-05    | 0.000165853 |
| 202342_s_at | 0.234329067 | 3.165402916 | 0.002457732 | 0.010837784 |
| 202343_x_at | -0.22460758 | -3.85666108 | 0.000288492 | 0.00180149  |
| 202344_at   | 0.089582736 | 2.071049367 | 0.042769982 | 0.112744842 |
| 202345_s_at | 0.658476573 | 3.807336595 | 0.00033858  | 0.002058837 |
| 202346_at   | -0.38184723 | -4.02683674 | 0.000164788 | 0.001117725 |

|             |             |             |             |             |
|-------------|-------------|-------------|-------------|-------------|
| 202347_s_at | -0.06838391 | -0.98507433 | 0.328639754 | 0.511156397 |
| 202348_s_at | -0.14628072 | -2.68162887 | 0.009503569 | 0.033477852 |
| 202349_at   | -0.17419733 | -5.03860823 | 4.80E-06    | 5.83E-05    |
| 202350_s_at | 0.6186239   | 3.942986041 | 0.000217467 | 0.001415122 |
| 202351_at   | 0.021152164 | 0.242240656 | 0.809439972 | 0.892992639 |
| 202352_s_at | -0.08242102 | -1.61510965 | 0.111662052 | 0.236593493 |
| 202353_s_at | -0.26655548 | -3.68556689 | 0.00050046  | 0.002866774 |
| 202354_s_at | -0.13148908 | -3.34339784 | 0.001447159 | 0.006956699 |
| 202355_s_at | -0.05738645 | -1.46152179 | 0.149217303 | 0.293083401 |
| 202356_s_at | -0.06008715 | -1.64139888 | 0.106074554 | 0.227611099 |
| 202357_s_at | 0.161481194 | 2.943253723 | 0.004649153 | 0.018578172 |
| 202358_s_at | -0.04367203 | -1.15393658 | 0.253213449 | 0.426157615 |
| 202359_s_at | 0.211785888 | 3.457631155 | 0.001021524 | 0.005189719 |
| 202360_at   | 0.093335643 | 3.083343961 | 0.003119991 | 0.013277343 |
| 202361_at   | 0.17389385  | 4.043237199 | 0.000156035 | 0.001068838 |
| 202362_at   | 0.188118055 | 2.798030383 | 0.006948248 | 0.025890537 |
| 202363_at   | -0.09336083 | -1.000212   | 0.321322665 | 0.50315859  |
| 202364_at   | 0.358874877 | 6.369070252 | 3.22E-08    | 1.05E-06    |
| 202365_at   | 0.44590181  | 5.601360484 | 5.98E-07    | 1.05E-05    |
| 202366_at   | 0.119438103 | 2.871132077 | 0.005684506 | 0.02190103  |
| 202367_at   | -0.00806077 | -0.23492717 | 0.815084715 | 0.896418685 |
| 202368_s_at | 0.127418327 | 2.937461249 | 0.004725352 | 0.018832301 |
| 202369_s_at | 0.16784637  | 3.963195312 | 0.000203456 | 0.00133522  |
| 202370_s_at | 0.546771138 | 6.33599428  | 3.65E-08    | 1.16E-06    |
| 202371_at   | -0.00812663 | -0.15468667 | 0.877600198 | 0.934562239 |
| 202372_at   | 0.012530923 | 0.33383306  | 0.739697922 | 0.848983783 |
| 202373_s_at | 0.019796006 | 0.544838025 | 0.587933703 | 0.742719574 |
| 202374_s_at | -0.09533536 | -2.80325498 | 0.006849977 | 0.025577672 |
| 202375_at   | 0.081071518 | 2.800718117 | 0.006897532 | 0.025731596 |
| 202376_at   | 0.955764042 | 3.349098386 | 0.00142244  | 0.006856825 |
| 202377_at   | 0.250682372 | 2.359348272 | 0.021661422 | 0.065695728 |
| 202378_s_at | 0.337609325 | 4.242569815 | 7.97E-05    | 0.000609403 |
| 202379_s_at | 0.324099263 | 3.933287919 | 0.000224517 | 0.001456118 |
| 202380_s_at | 0.068247178 | 1.683440946 | 0.097613485 | 0.213672031 |
| 202381_at   | 0.19895251  | 1.728348086 | 0.089195227 | 0.199645069 |
| 202382_s_at | -0.1757455  | -3.32779875 | 0.001516894 | 0.007229712 |
| 202383_at   | -0.04027508 | -0.81193432 | 0.420117211 | 0.602275271 |
| 202384_s_at | 0.149215568 | 2.522936852 | 0.014374366 | 0.046881642 |
| 202385_s_at | 0.037711917 | 0.771497858 | 0.443513641 | 0.623749433 |
| 202386_s_at | -0.03843952 | -0.54507285 | 0.587773226 | 0.742600809 |
| 202387_at   | 0.020042781 | 0.431464906 | 0.667714512 | 0.799824856 |
| 202388_at   | -0.54713758 | -4.10603341 | 0.000126488 | 0.000899871 |
| 202389_s_at | -0.02882015 | -0.81460923 | 0.41859618  | 0.601076355 |
| 202390_s_at | -0.1015718  | -2.45415764 | 0.017114616 | 0.05426912  |
| 202391_at   | -0.58400871 | -5.6827197  | 4.40E-07    | 8.19E-06    |
| 202392_s_at | -0.27867732 | -5.27182568 | 2.04E-06    | 2.88E-05    |
| 202393_s_at | 0.359559553 | 2.625816904 | 0.011011617 | 0.037682328 |
| 202394_s_at | 0.006676925 | 0.210526883 | 0.833987227 | 0.90839992  |
| 202395_at   | -0.93526486 | -5.58477391 | 6.36E-07    | 1.10E-05    |
| 202396_at   | -0.24267967 | -2.45036135 | 0.017278739 | 0.0546899   |
| 202397_at   | 0.009365988 | 0.21182836  | 0.832976399 | 0.907622623 |
| 202398_at   | -0.01161031 | -0.36655262 | 0.71527372  | 0.833125179 |
| 202399_s_at | -0.0168751  | -0.54063296 | 0.59081088  | 0.744754325 |
| 202400_s_at | -0.01880224 | -0.60986996 | 0.544307037 | 0.708721889 |
| 202401_s_at | -0.13656271 | -3.50345682 | 0.000886735 | 0.004612427 |
| 202402_s_at | -0.08415066 | -2.17809841 | 0.033437718 | 0.092842847 |
| 202403_s_at | 0.236488003 | 3.293855488 | 0.001679755 | 0.007877018 |
| 202404_s_at | 0.107103549 | 3.452984657 | 0.001036228 | 0.005250694 |
| 202405_at   | 0.089118914 | 2.046363011 | 0.045218212 | 0.117911916 |
| 202406_s_at | 0.311377532 | 4.011759247 | 0.000173251 | 0.001167334 |
| 202407_s_at | -0.01970346 | -0.48509507 | 0.629418532 | 0.773566523 |
| 202408_s_at | 0.190926577 | 3.657470277 | 0.000547174 | 0.003090788 |
| 202409_at   | 0.022540249 | 0.244859562 | 0.807421083 | 0.891654634 |
| 202410_x_at | -0.05495825 | -0.79474668 | 0.429969796 | 0.610872306 |
| 202411_at   | 0.256953034 | 2.94671333  | 0.004604188 | 0.018426648 |
| 202412_s_at | 0.235267229 | 2.883430908 | 0.005494059 | 0.021288408 |
| 202413_s_at | 0.280505173 | 3.544586253 | 0.000780313 | 0.004148675 |
| 202414_at   | 0.161956209 | 3.490796469 | 0.00092218  | 0.004763531 |
| 202415_s_at | -0.30834745 | -7.14836827 | 1.57E-09    | 1.25E-07    |
| 202416_at   | -0.21179036 | -3.77164842 | 0.000379917 | 0.002269344 |
| 202417_at   | 0.209107464 | 5.508633517 | 8.46E-07    | 1.40E-05    |
| 202418_at   | 0.17029831  | 2.452924761 | 0.017167762 | 0.054400941 |
| 202419_at   | 0.281081392 | 5.167305797 | 3.00E-06    | 3.95E-05    |
| 202420_s_at | 0.101542783 | 2.896107775 | 0.005303953 | 0.020691715 |
| 202421_at   | -0.24478145 | -4.45236896 | 3.87E-05    | 0.000333652 |

|             |             |             |             |             |
|-------------|-------------|-------------|-------------|-------------|
| 202422_s_at | -0.18582474 | -3.48467209 | 0.000939805 | 0.004839473 |
| 202423_at   | 0.343082747 | 8.87887735  | 1.94E-12    | 2.88E-09    |
| 202424_at   | -0.13914041 | -2.7355646  | 0.008228087 | 0.029775681 |
| 202425_x_at | -0.46182231 | -5.59473044 | 6.13E-07    | 1.07E-05    |
| 202426_s_at | 0.101497811 | 2.642100494 | 0.010550517 | 0.036416723 |
| 202427_s_at | -0.23327667 | -2.92481605 | 0.004895743 | 0.019387739 |
| 202428_x_at | 0.451468541 | 5.524500931 | 7.97E-07    | 1.33E-05    |
| 202429_s_at | -1.35697123 | -8.63164929 | 5.00E-12    | 4.14E-09    |
| 202430_s_at | 0.219291595 | 2.059469183 | 0.04390374  | 0.115217027 |
| 202431_s_at | 0.052485841 | 1.163371829 | 0.249396697 | 0.421804593 |
| 202432_at   | -0.74661013 | -5.45789517 | 1.02E-06    | 1.63E-05    |
| 202433_at   | -0.19607965 | -2.93985404 | 0.004693736 | 0.018726338 |
| 202434_s_at | -0.06402989 | -1.52177447 | 0.133446907 | 0.270366253 |
| 202435_s_at | 0.089679828 | 1.69518839  | 0.095350736 | 0.209901246 |
| 202436_s_at | 0.226405062 | 2.999254044 | 0.003969128 | 0.016295082 |
| 202437_s_at | 0.219889543 | 1.684354909 | 0.097435875 | 0.213345948 |
| 202438_x_at | -1.1194553  | -6.83663389 | 5.28E-09    | 2.87E-07    |
| 202439_s_at | -0.66334691 | -7.68485041 | 1.95E-10    | 3.21E-08    |
| 202440_s_at | 0.391004912 | 5.889080805 | 2.02E-07    | 4.36E-06    |
| 202441_at   | 0.066564469 | 1.432861008 | 0.157214151 | 0.304413806 |
| 202442_at   | -0.29651604 | -7.09680816 | 1.92E-09    | 1.41E-07    |
| 202443_x_at | 0.673154235 | 6.403950257 | 2.81E-08    | 9.46E-07    |
| 202444_s_at | -0.18671144 | -3.10349182 | 0.002943453 | 0.01263313  |
| 202445_s_at | 0.067908354 | 2.060465763 | 0.043805157 | 0.115005585 |
| 202446_s_at | 0.244036781 | 1.456120738 | 0.150699443 | 0.295241956 |
| 202447_at   | 0.034260461 | 0.5021161   | 0.617468495 | 0.76500158  |
| 202448_s_at | -0.09551901 | -2.07257201 | 0.042622813 | 0.112449118 |
| 202449_s_at | 0.630859961 | 7.126202807 | 1.71E-09    | 1.31E-07    |
| 202450_s_at | 0.05589817  | 1.587589084 | 0.117764025 | 0.246238879 |
| 202451_at   | 0.000399054 | 0.007833092 | 0.993776782 | 0.997190596 |
| 202452_at   | -0.13566752 | -3.08323013 | 0.003121016 | 0.013279176 |
| 202453_s_at | -0.17686698 | -3.20262966 | 0.002203004 | 0.009888185 |
| 202454_s_at | 0.229876532 | 2.574276286 | 0.012594696 | 0.042112984 |
| 202455_at   | 0.136163582 | 3.214348468 | 0.002128096 | 0.009602108 |
| 202456_s_at | -0.25036054 | -4.9817385  | 5.90E-06    | 6.89E-05    |
| 202457_s_at | -1.02754735 | -7.81753446 | 1.17E-10    | 2.29E-08    |
| 202458_at   | -0.02117426 | -0.35823664 | 0.721454257 | 0.837187716 |
| 202459_s_at | -0.32000695 | -4.38597725 | 4.88E-05    | 0.000402881 |
| 202460_s_at | -0.13759998 | -2.99795764 | 0.003983764 | 0.016343159 |
| 202461_at   | 0.050844374 | 1.078768192 | 0.285114061 | 0.462835262 |
| 202462_s_at | -0.02362983 | -0.38120697 | 0.704429115 | 0.82570148  |
| 202463_s_at | -0.03902306 | -1.03372721 | 0.305513502 | 0.485527681 |
| 202464_s_at | 0.514376445 | 4.681236843 | 1.73E-05    | 0.000169093 |
| 202465_at   | 0.042754484 | 1.154001057 | 0.253187228 | 0.42614558  |
| 202466_at   | 0.04980567  | 1.086939454 | 0.281516852 | 0.458795579 |
| 202467_s_at | -0.1521475  | -1.69473788 | 0.09543671  | 0.210029595 |
| 202468_s_at | 0.153345162 | 2.275681865 | 0.026539207 | 0.077269722 |
| 202469_s_at | 0.06927724  | 0.783991631 | 0.436204408 | 0.616710874 |
| 202470_s_at | -0.06371256 | -1.32951062 | 0.188835083 | 0.347186833 |
| 202471_s_at | -0.38134581 | -4.04096564 | 0.00015722  | 0.00107537  |
| 202472_at   | 0.008648351 | 0.208829851 | 0.835305695 | 0.909040141 |
| 202473_x_at | -0.01831634 | -0.33134187 | 0.741568972 | 0.850111829 |
| 202474_s_at | 0.022509717 | 0.752643302 | 0.454678929 | 0.633748463 |
| 202475_at   | -0.08294091 | -1.76077543 | 0.083496907 | 0.189635316 |
| 202476_s_at | -0.048535   | -1.41597826 | 0.162078379 | 0.311218341 |
| 202477_s_at | -0.08438609 | -1.75752687 | 0.084053786 | 0.190696574 |
| 202478_at   | 0.3797802   | 7.274654413 | 9.63E-10    | 9.15E-08    |
| 202479_s_at | -0.00942145 | -0.24063587 | 0.810677731 | 0.893755337 |
| 202480_s_at | -0.05850578 | -1.79369257 | 0.07802516  | 0.180044426 |
| 202481_at   | 0.27417195  | 3.548637687 | 0.000770515 | 0.004107328 |
| 202482_x_at | -0.111771   | -1.99156061 | 0.051089557 | 0.129636888 |
| 202483_s_at | -0.19617913 | -2.78599911 | 0.007179508 | 0.026590417 |
| 202484_s_at | 0.066350921 | 0.907227365 | 0.368004376 | 0.551186419 |
| 202485_s_at | -0.02190398 | -0.46715477 | 0.64212256  | 0.782529529 |
| 202486_at   | -0.08656644 | -2.29360175 | 0.025419308 | 0.074675587 |
| 202487_s_at | 0.150128478 | 3.278225159 | 0.001760175 | 0.008191788 |
| 202488_s_at | 0.018528451 | 0.407366885 | 0.685223727 | 0.811920537 |
| 202489_s_at | 0.116489378 | 3.323922523 | 0.001534708 | 0.007301381 |
| 202490_at   | -0.07189154 | -3.27203596 | 0.001793012 | 0.008322076 |
| 202491_s_at | 0.005908304 | 0.070138226 | 0.944322586 | 0.971270943 |
| 202492_at   | -0.01489328 | -0.45350295 | 0.651862559 | 0.788989179 |
| 202493_x_at | 0.052221474 | 1.68179697  | 0.097933624 | 0.214100159 |
| 202494_at   | 0.122069991 | 3.330055848 | 0.001506611 | 0.007188008 |
| 202495_at   | -0.12257245 | -2.57599797 | 0.01253864  | 0.04195694  |
| 202496_at   | -0.01809363 | -0.43717228 | 0.663594211 | 0.796983566 |

|             |             |             |             |             |
|-------------|-------------|-------------|-------------|-------------|
| 202497_x_at | -0.17267054 | -2.11759369 | 0.038465467 | 0.103647572 |
| 202498_s_at | -0.15923705 | -3.92955262 | 0.00022729  | 0.001471117 |
| 202499_s_at | -0.16149636 | -1.68253516 | 0.097789767 | 0.213848426 |
| 202500_at   | 0.460120096 | 6.304725989 | 4.12E-08    | 1.27E-06    |
| 202501_at   | -0.13175365 | -2.24648893 | 0.028457385 | 0.081636654 |
| 202502_at   | 0.018872418 | 0.264201451 | 0.792552197 | 0.881858855 |
| 202503_s_at | 0.145919478 | 2.442685992 | 0.017614895 | 0.055564998 |
| 202504_at   | 0.047939192 | 0.925588826 | 0.358458074 | 0.541552574 |
| 202505_at   | -0.03630889 | -0.86160008 | 0.392421651 | 0.575208541 |
| 202506_at   | 0.676141121 | 6.91117475  | 3.95E-09    | 2.34E-07    |
| 202507_s_at | -1.53460513 | -6.88819909 | 4.32E-09    | 2.50E-07    |
| 202508_s_at | -1.15333583 | -5.92893275 | 1.73E-07    | 3.87E-06    |
| 202509_s_at | 0.041306622 | 0.76316512  | 0.448428194 | 0.627934353 |
| 202510_s_at | -0.02456352 | -0.35518384 | 0.723727848 | 0.838535893 |
| 202511_s_at | -0.07688481 | -1.44085263 | 0.154951554 | 0.301182744 |
| 202512_s_at | 0.051227288 | 1.011462814 | 0.315955592 | 0.497224808 |
| 202513_s_at | -0.26674909 | -5.86685312 | 2.19E-07    | 4.63E-06    |
| 202514_at   | -0.24630746 | -1.91745758 | 0.060061167 | 0.147163031 |
| 202515_at   | -0.13975269 | -2.60336074 | 0.011677645 | 0.03957065  |
| 202516_s_at | -0.21841682 | -2.44327331 | 0.017588966 | 0.055506713 |
| 202517_at   | -0.2798569  | -5.6712699  | 4.60E-07    | 8.46E-06    |
| 202518_at   | -0.2516711  | -5.66314575 | 4.74E-07    | 8.67E-06    |
| 202519_at   | -0.04162448 | -0.82154495 | 0.414667843 | 0.596884024 |
| 202520_s_at | 0.056492518 | 1.040872748 | 0.302212546 | 0.481858121 |
| 202521_at   | 0.122965821 | 2.325642227 | 0.023521113 | 0.070272449 |
| 202522_at   | -0.11984094 | -3.43477814 | 0.001095802 | 0.005493393 |
| 202523_s_at | -0.30716866 | -3.89046446 | 0.000258362 | 0.00163853  |
| 202524_s_at | -0.31933289 | -4.58423177 | 2.44E-05    | 0.000226036 |
| 202525_at   | -0.04007546 | -1.51680556 | 0.134695298 | 0.272229107 |
| 202526_at   | -0.01324497 | -0.70194604 | 0.485493158 | 0.660306153 |
| 202527_s_at | 0.130282783 | 1.81550334  | 0.074567119 | 0.173842132 |
| 202528_at   | -0.05782224 | -1.71733897 | 0.091201427 | 0.203006983 |
| 202529_at   | 0.101759433 | 2.03845704  | 0.04602748  | 0.119659132 |
| 202530_at   | -0.04794565 | -1.23550662 | 0.221575145 | 0.388530944 |
| 202531_at   | 0.154773243 | 2.087281942 | 0.041223516 | 0.109494911 |
| 202532_s_at | 0.168396361 | 3.856141296 | 0.00028898  | 0.001803786 |
| 202533_s_at | 0.00237959  | 0.100202372 | 0.92052589  | 0.958253247 |
| 202534_x_at | 0.265566454 | 3.741228547 | 0.000418931 | 0.002464831 |
| 202535_at   | 0.069220824 | 1.533038818 | 0.130650857 | 0.266209908 |
| 202536_at   | -0.09943931 | -0.77487426 | 0.441531297 | 0.621878671 |
| 202537_s_at | -0.02140396 | -0.21834071 | 0.827922687 | 0.904431298 |
| 202538_s_at | -0.09316961 | -1.56787593 | 0.12229774  | 0.2532072   |
| 202539_s_at | -0.42480542 | -4.60836351 | 2.24E-05    | 0.000210255 |
| 202540_s_at | -0.32150913 | -3.10893239 | 0.00289741  | 0.012461846 |
| 202541_at   | 0.069647176 | 0.929056845 | 0.356673111 | 0.539785597 |
| 202542_s_at | 0.114576072 | 1.65736914  | 0.102792738 | 0.22226586  |
| 202543_s_at | 0.072887305 | 0.762931948 | 0.448566171 | 0.628068526 |
| 202544_at   | 0.196221694 | 4.201869091 | 9.16E-05    | 0.000684105 |
| 202545_at   | -0.46198326 | -6.62634647 | 1.19E-08    | 5.11E-07    |
| 202546_at   | 0.252711656 | 2.921111583 | 0.004946729 | 0.019552419 |
| 202547_s_at | -0.02738963 | -0.62984073 | 0.531248434 | 0.698372085 |
| 202548_s_at | 0.140202103 | 2.66364453  | 0.009967528 | 0.034804967 |
| 202549_at   | 0.054764127 | 1.394949907 | 0.168299003 | 0.320177893 |
| 202550_s_at | -0.10842521 | -2.33242918 | 0.023135606 | 0.069296728 |
| 202551_s_at | 0.031447518 | 0.392760963 | 0.695921963 | 0.81996637  |
| 202552_s_at | 0.006642466 | 0.14749104  | 0.883251043 | 0.937541697 |
| 202553_s_at | 0.177204921 | 4.054997941 | 0.000150036 | 0.001034143 |
| 202554_s_at | -0.13450062 | -1.37571281 | 0.174149281 | 0.328109256 |
| 202555_s_at | 0.647094868 | 7.248419817 | 1.07E-09    | 9.73E-08    |
| 202556_s_at | -0.0216669  | -0.57633185 | 0.566599317 | 0.726675371 |
| 202557_at   | -0.38452252 | -4.50420176 | 3.23E-05    | 0.000285226 |
| 202558_s_at | -0.35037503 | -3.96532141 | 0.000202033 | 0.001328213 |
| 202559_x_at | 0.03353005  | 1.15418978  | 0.253110485 | 0.42604155  |
| 202560_s_at | 0.057282364 | 0.831998829 | 0.408789275 | 0.590951581 |
| 202561_at   | 0.08219919  | 1.383268619 | 0.171833132 | 0.324909728 |
| 202562_s_at | 0.011554077 | 0.305299311 | 0.761220641 | 0.862500581 |
| 202563_at   | 0.001140629 | 0.042582997 | 0.966178797 | 0.982781319 |
| 202564_x_at | -0.19495197 | -3.88491081 | 0.000263095 | 0.001663591 |
| 202565_s_at | 0.15485064  | 3.268301263 | 0.001813104 | 0.008401374 |
| 202566_s_at | 0.015492821 | 0.466978924 | 0.642247624 | 0.782585974 |
| 202567_at   | 0.050383741 | 1.084944682 | 0.282392077 | 0.459668804 |
| 202568_s_at | 0.018600571 | 0.452252707 | 0.652757642 | 0.789463496 |
| 202569_s_at | 0.204637624 | 3.351786588 | 0.001410922 | 0.006809603 |
| 202570_s_at | -0.12285775 | -2.96445171 | 0.00437992  | 0.01768711  |
| 202571_s_at | -0.17656628 | -3.36954034 | 0.00133704  | 0.006505009 |

|             |             |             |             |             |
|-------------|-------------|-------------|-------------|-------------|
| 202572_s_at | -0.53924341 | -7.42630325 | 5.34E-10    | 6.02E-08    |
| 202573_at   | -0.01891913 | -0.458661   | 0.648175227 | 0.786496721 |
| 202574_s_at | -0.03187879 | -0.88610971 | 0.379182472 | 0.561832287 |
| 202575_at   | -0.1025295  | -2.05686538 | 0.044162221 | 0.115739048 |
| 202576_s_at | -0.06378977 | -1.58064301 | 0.119345831 | 0.248455964 |
| 202577_s_at | 0.114517909 | 2.691651062 | 0.009253671 | 0.032796595 |
| 202578_s_at | -0.06041782 | -1.70413373 | 0.093656765 | 0.207120993 |
| 202579_x_at | -0.04681753 | -1.15478409 | 0.252868921 | 0.42583435  |
| 202580_x_at | 0.005325193 | 0.120389072 | 0.904587011 | 0.949437489 |
| 202581_at   | 0.841475648 | 3.467484499 | 0.000990995 | 0.005057412 |
| 202582_s_at | -0.02102739 | -0.30839418 | 0.758876678 | 0.861205587 |
| 202583_s_at | -0.16351385 | -2.46474081 | 0.016664461 | 0.053034828 |
| 202584_at   | -0.03818172 | -0.94958763 | 0.346224024 | 0.529303876 |
| 202585_s_at | -0.08157199 | -2.80010873 | 0.006909001 | 0.025763628 |
| 202586_at   | 0.047301998 | 1.322607339 | 0.191107561 | 0.350154933 |
| 202587_s_at | 0.664730429 | 4.602034755 | 2.29E-05    | 0.000214252 |
| 202588_at   | 0.140433497 | 2.742537998 | 0.008075173 | 0.029319655 |
| 202589_at   | -0.06272599 | -0.55671548 | 0.579843053 | 0.736433138 |
| 202590_s_at | -0.16170604 | -3.39577838 | 0.001234523 | 0.006082385 |
| 202591_s_at | -0.26354814 | -2.31008016 | 0.024426719 | 0.072397302 |
| 202592_at   | 0.119355476 | 2.329571017 | 0.023297261 | 0.069701513 |
| 202593_s_at | -0.49483194 | -4.44998573 | 3.91E-05    | 0.00033578  |
| 202594_at   | -0.07114755 | -1.11479727 | 0.269491108 | 0.445170823 |
| 202595_s_at | -0.16710026 | -2.54901041 | 0.013443906 | 0.044420748 |
| 202596_at   | -0.42600947 | -5.86876176 | 2.18E-07    | 4.61E-06    |
| 202597_at   | 0.056146699 | 1.212711783 | 0.230109132 | 0.398050679 |
| 202598_at   | 0.265304631 | 2.905097227 | 0.005172858 | 0.020267787 |
| 202599_s_at | 0.085742069 | 1.185762721 | 0.240504656 | 0.410535257 |
| 202600_s_at | 0.130789284 | 1.900565744 | 0.062284261 | 0.151498023 |
| 202601_s_at | -0.06105692 | -1.51090534 | 0.136189678 | 0.274380791 |
| 202602_s_at | 0.090077304 | 1.362131877 | 0.178372381 | 0.33391214  |
| 202603_at   | 0.10419947  | 1.868190516 | 0.066740515 | 0.159822489 |
| 202604_x_at | -0.06813809 | -1.33030247 | 0.188575724 | 0.346838399 |
| 202605_at   | 0.290229309 | 5.210612272 | 2.56E-06    | 3.47E-05    |
| 202606_s_at | -0.24706593 | -3.79619907 | 0.000350993 | 0.002121244 |
| 202607_at   | 0.174645643 | 3.210066754 | 0.002155183 | 0.009705708 |
| 202608_s_at | -0.04966247 | -1.44469118 | 0.153873834 | 0.299635284 |
| 202609_at   | 0.442110674 | 4.897236283 | 8.01E-06    | 8.87E-05    |
| 202610_s_at | 0.172681226 | 3.691823558 | 0.00049059  | 0.002819267 |
| 202611_s_at | 0.098376502 | 2.130712298 | 0.037322582 | 0.101214857 |
| 202612_s_at | -0.01588189 | -0.40836552 | 0.684494595 | 0.811311085 |
| 202613_at   | -0.18436009 | -3.52987528 | 0.000816899 | 0.004304276 |
| 202614_at   | -0.20788776 | -2.32361223 | 0.023637525 | 0.070568354 |
| 202615_at   | -0.06614604 | -2.08777649 | 0.041177173 | 0.109417338 |
| 202616_s_at | -0.06582852 | -1.85991342 | 0.067922107 | 0.162009649 |
| 202617_s_at | -0.15440423 | -3.63148234 | 0.000594068 | 0.003310071 |
| 202618_s_at | 0.010892324 | 0.312390316 | 0.755853486 | 0.859599674 |
| 202619_s_at | 0.585609359 | 4.564346028 | 2.62E-05    | 0.000239712 |
| 202620_s_at | 0.639292809 | 3.713052901 | 0.000458467 | 0.002662693 |
| 202621_at   | 0.251820404 | 6.356840517 | 3.37E-08    | 1.09E-06    |
| 202622_s_at | 0.153024496 | 3.448132212 | 0.001051799 | 0.005316329 |
| 202623_at   | 0.165742788 | 1.893798149 | 0.06319432  | 0.153206436 |
| 202624_s_at | -0.06551092 | -2.03809769 | 0.04606456  | 0.119727438 |
| 202625_at   | 0.19605152  | 2.401727331 | 0.019510106 | 0.06040332  |
| 202626_s_at | 0.290204527 | 3.076489233 | 0.003182277 | 0.013496142 |
| 202627_s_at | -0.00458814 | -0.08829613 | 0.929942543 | 0.963497351 |
| 202628_s_at | -0.00980612 | -0.23428853 | 0.815578107 | 0.896738134 |
| 202629_at   | -0.06972346 | -1.66019567 | 0.102220616 | 0.22133933  |
| 202630_at   | -0.13910893 | -2.44055127 | 0.017709428 | 0.055800181 |
| 202631_s_at | -0.02501191 | -0.36382194 | 0.717301109 | 0.834535493 |
| 202632_at   | -0.13783759 | -4.28338273 | 6.94E-05    | 0.000541194 |
| 202633_at   | -0.11503262 | -2.26994578 | 0.026906807 | 0.078053552 |
| 202634_at   | -0.21233833 | -3.780086   | 0.000369728 | 0.002215887 |
| 202635_s_at | -0.39708646 | -4.36413757 | 5.26E-05    | 0.000430201 |
| 202636_at   | -0.06286558 | -1.35069935 | 0.181987642 | 0.338670115 |
| 202637_s_at | 0.134583727 | 2.535710332 | 0.013911486 | 0.045641766 |
| 202638_s_at | 0.117298108 | 1.648598283 | 0.104584706 | 0.225258227 |
| 202639_s_at | 0.019355549 | 0.545145767 | 0.587723402 | 0.742558853 |
| 202640_s_at | 0.115146478 | 2.554623198 | 0.013250891 | 0.043890078 |
| 202641_at   | -0.26172536 | -3.44332094 | 0.001067456 | 0.005378436 |
| 202642_s_at | 0.038122978 | 1.039338713 | 0.302919151 | 0.48260597  |
| 202643_s_at | 0.187797736 | 2.397530023 | 0.019714293 | 0.060868476 |
| 202644_s_at | 0.273003762 | 3.650346792 | 0.000559664 | 0.003150586 |
| 202645_s_at | -0.18649498 | -4.31497234 | 6.22E-05    | 0.000494152 |
| 202646_s_at | 0.077716862 | 1.491736703 | 0.141135368 | 0.28162798  |

|             |             |             |             |             |
|-------------|-------------|-------------|-------------|-------------|
| 202647_s_at | 0.004000275 | 0.071497996 | 0.94324502  | 0.970742161 |
| 202648_at   | 0.014668404 | 0.439597514 | 0.661846521 | 0.795773338 |
| 202649_x_at | 0.095700999 | 1.786628561 | 0.079173463 | 0.182120562 |
| 202650_s_at | -0.00870664 | -0.22803038 | 0.820416882 | 0.900134318 |
| 202651_at   | 0.072106224 | 0.667690173 | 0.506954018 | 0.678346976 |
| 202652_at   | -0.01056045 | -0.25432657 | 0.800134126 | 0.886938697 |
| 202653_s_at | -0.00496206 | -0.0675095  | 0.94640605  | 0.972391833 |
| 202654_x_at | -0.19316689 | -2.90880622 | 0.005119649 | 0.020095497 |
| 202655_at   | 0.061856641 | 0.853775973 | 0.396707782 | 0.579135826 |
| 202656_s_at | 0.098239966 | 1.664942376 | 0.10126568  | 0.219718699 |
| 202657_s_at | 0.172631727 | 3.163195718 | 0.002473671 | 0.010897319 |
| 202658_at   | -0.4125905  | -4.67904793 | 1.75E-05    | 0.000170242 |
| 202659_at   | -0.14945563 | -2.35985688 | 0.021634394 | 0.06563603  |
| 202660_at   | 0.430720912 | 6.053664463 | 1.08E-07    | 2.68E-06    |
| 202661_at   | 0.34055211  | 4.360996123 | 5.31E-05    | 0.000434089 |
| 202662_s_at | 0.107249814 | 2.466516372 | 0.016589991 | 0.052861818 |
| 202663_at   | -0.00953358 | -0.27493694 | 0.784332283 | 0.876901552 |
| 202664_at   | 0.327643917 | 3.472211891 | 0.000976658 | 0.004997572 |
| 202665_s_at | -0.02276574 | -0.54258481 | 0.589474566 | 0.743909112 |
| 202666_s_at | 0.29516001  | 4.913351225 | 7.56E-06    | 8.46E-05    |
| 202667_s_at | 0.06425981  | 1.701314242 | 0.094187997 | 0.208069297 |
| 202668_at   | -0.25935897 | -4.23996586 | 8.04E-05    | 0.000613466 |
| 202669_s_at | -0.06698452 | -0.99521954 | 0.323723713 | 0.505763132 |
| 202670_at   | -0.89167785 | -5.89814848 | 1.95E-07    | 4.25E-06    |
| 202671_s_at | 0.092292353 | 1.447156819 | 0.153184665 | 0.298709762 |
| 202672_s_at | 0.374624561 | 2.53026908  | 0.014106988 | 0.046161189 |
| 202673_at   | -0.11253177 | -1.21349297 | 0.229812756 | 0.397707326 |
| 202674_s_at | -0.68803655 | -8.4288707  | 1.09E-11    | 5.81E-09    |
| 202675_at   | -0.28075288 | -3.84157312 | 0.000303004 | 0.001879247 |
| 202676_x_at | -0.09633794 | -2.76810553 | 0.007536579 | 0.027672097 |
| 202677_at   | 0.011693215 | 0.193768604 | 0.847027568 | 0.915907093 |
| 202678_at   | -0.13628152 | -2.78021822 | 0.007293127 | 0.02693088  |
| 202679_at   | 0.339614693 | 3.478907958 | 0.000956686 | 0.004914508 |
| 202680_at   | 0.080104808 | 1.344314906 | 0.184030687 | 0.341260572 |
| 202681_at   | -0.00171373 | -0.06106774 | 0.951513183 | 0.975128584 |
| 202682_s_at | 0.17933545  | 3.131206215 | 0.00271585  | 0.011816275 |
| 202683_s_at | -0.26504392 | -5.95764935 | 1.55E-07    | 3.55E-06    |
| 202684_s_at | -0.02693295 | -1.21362157 | 0.229763992 | 0.397638334 |
| 202685_s_at | 0.068156803 | 1.422733002 | 0.160118409 | 0.308505954 |
| 202686_s_at | 0.321990585 | 4.268410224 | 7.30E-05    | 0.000566142 |
| 202687_s_at | -0.06859083 | -1.49118169 | 0.141280648 | 0.281829796 |
| 202688_at   | -0.08483966 | -0.86628861 | 0.389867075 | 0.572760923 |
| 202689_at   | -0.11700527 | -3.89954291 | 0.000250801 | 0.001598286 |
| 202690_s_at | 0.006480972 | 0.076845053 | 0.939008731 | 0.968167263 |
| 202691_at   | -0.12356359 | -3.10188547 | 0.002957177 | 0.01268838  |
| 202692_s_at | 0.122502939 | 2.630375171 | 0.010880725 | 0.03731527  |
| 202693_s_at | -0.07969185 | -2.25745525 | 0.027722904 | 0.079878448 |
| 202694_at   | -0.01258482 | -0.60513288 | 0.547428403 | 0.710942673 |
| 202695_s_at | -0.13507888 | -3.48107454 | 0.000950308 | 0.004886235 |
| 202696_at   | 0.145246151 | 3.085904496 | 0.003097019 | 0.013197174 |
| 202697_at   | -0.12987661 | -2.30800955 | 0.024549522 | 0.07265527  |
| 202698_x_at | -0.35100483 | -6.87234393 | 4.60E-09    | 2.61E-07    |
| 202699_s_at | 0.151499256 | 1.634919009 | 0.107430221 | 0.229846877 |
| 202700_s_at | -0.00211856 | -0.02848323 | 0.977373581 | 0.988635229 |
| 202701_at   | 0.027077224 | 0.646898019 | 0.520225349 | 0.689376484 |
| 202702_at   | 0.110010674 | 2.978947424 | 0.004204235 | 0.017100078 |
| 202703_at   | -0.00411309 | -0.12507513 | 0.900892414 | 0.94713441  |
| 202704_at   | 0.590181926 | 4.608955693 | 2.24E-05    | 0.000209923 |
| 202705_at   | 0.020216917 | 0.418478916 | 0.677127632 | 0.806282155 |
| 202706_s_at | 0.116462709 | 2.641781056 | 0.010559391 | 0.036444526 |
| 202707_at   | -0.04804308 | -1.20637132 | 0.232524976 | 0.401032642 |
| 202708_s_at | 0.485637594 | 5.510030313 | 8.42E-07    | 1.39E-05    |
| 202709_at   | -0.01897494 | -0.38159492 | 0.70414284  | 0.825548111 |
| 202710_at   | -0.05396714 | -0.91658823 | 0.363117448 | 0.546269646 |
| 202711_at   | -0.02030913 | -0.36892611 | 0.713513199 | 0.831789966 |
| 202712_s_at | -0.88773081 | -7.56747944 | 3.08E-10    | 4.33E-08    |
| 202713_s_at | 0.169710505 | 3.577817093 | 0.000703325 | 0.003809139 |
| 202714_s_at | 0.050422804 | 1.870319503 | 0.066439415 | 0.159293355 |
| 202715_at   | 0.11766461  | 2.922613339 | 0.004926    | 0.01948255  |
| 202716_at   | 0.11471169  | 2.86171675  | 0.00583441  | 0.022376335 |
| 202717_s_at | 0.13553602  | 3.733205669 | 0.000429843 | 0.002519086 |
| 202718_at   | 0.162095322 | 1.940041551 | 0.057194668 | 0.141740274 |
| 202719_s_at | 0.079306904 | 1.980943764 | 0.052299774 | 0.132152514 |
| 202720_at   | 0.0678238   | 2.857204865 | 0.005907532 | 0.022604403 |
| 202721_s_at | 0.049116068 | 1.371074143 | 0.175583014 | 0.330116094 |

|             |             |             |             |             |
|-------------|-------------|-------------|-------------|-------------|
| 202722_s_at | -0.18120954 | -2.53679571 | 0.013872784 | 0.045564963 |
| 202723_s_at | 0.015421831 | 0.365247193 | 0.716242675 | 0.833788484 |
| 202724_s_at | 0.135334658 | 2.419259013 | 0.018677579 | 0.058275508 |
| 202725_at   | 0.028676228 | 0.560868661 | 0.577026692 | 0.734191514 |
| 202726_at   | 0.092136165 | 2.564133558 | 0.012929574 | 0.04300748  |
| 202727_s_at | 0.394847387 | 4.696370499 | 1.64E-05    | 0.000161707 |
| 202728_s_at | 0.307146605 | 5.556739485 | 7.07E-07    | 1.20E-05    |
| 202729_s_at | 0.429315599 | 6.19704633  | 6.23E-08    | 1.75E-06    |
| 202730_s_at | -0.01363923 | -0.77019044 | 0.444282649 | 0.624457658 |
| 202731_at   | 0.044162003 | 0.542239059 | 0.589711175 | 0.744048711 |
| 202732_at   | -0.04119432 | -0.79359725 | 0.430633571 | 0.611459801 |
| 202733_at   | 0.438672182 | 4.416353278 | 4.39E-05    | 0.00036897  |
| 202734_at   | 0.272075172 | 3.914729925 | 0.000238625 | 0.001532712 |
| 202735_at   | -0.00806927 | -0.17012019 | 0.865501928 | 0.927335351 |
| 202736_s_at | -0.24910179 | -4.80883234 | 1.10E-05    | 0.000115479 |
| 202737_s_at | -0.12284188 | -1.81271624 | 0.075001724 | 0.17465491  |
| 202738_s_at | -0.15576562 | -2.40472696 | 0.019365346 | 0.060056626 |
| 202739_s_at | 0.126944103 | 2.279844921 | 0.026275209 | 0.076708619 |
| 202740_at   | 0.114333122 | 2.892747731 | 0.005353739 | 0.020847722 |
| 202741_at   | -0.373101   | -5.59331474 | 6.16E-07    | 1.07E-05    |
| 202742_s_at | -0.60138707 | -5.95974012 | 1.54E-07    | 3.53E-06    |
| 202743_at   | 0.001213774 | 0.021962088 | 0.982552853 | 0.991426265 |
| 202744_at   | 0.178532715 | 2.604907094 | 0.011630632 | 0.039454153 |
| 202745_at   | 0.256211006 | 4.2339376   | 8.21E-05    | 0.000624157 |
| 202746_at   | 0.17627568  | 1.724674797 | 0.089860522 | 0.200661859 |
| 202747_s_at | 0.01766535  | 0.204474288 | 0.838691813 | 0.910948903 |
| 202748_at   | 0.380245243 | 2.908015624 | 0.005130948 | 0.020127474 |
| 202749_at   | -0.03654254 | -0.40130714 | 0.689654535 | 0.8152038   |
| 202750_s_at | 0.081897941 | 1.99345689  | 0.05087595  | 0.129219593 |
| 202751_at   | -0.04991568 | -1.29430706 | 0.200639738 | 0.362669005 |
| 202752_x_at | -0.19045847 | -4.44761688 | 3.94E-05    | 0.000337906 |
| 202753_at   | -0.17997635 | -2.64750856 | 0.010401319 | 0.03599905  |
| 202754_at   | -0.38365121 | -5.4583316  | 1.02E-06    | 1.63E-05    |
| 202755_s_at | -0.13966698 | -3.60133526 | 0.000653273 | 0.003584102 |
| 202756_s_at | -0.18374769 | -3.71321885 | 0.000458224 | 0.002661792 |
| 202757_at   | 0.112821471 | 2.517876726 | 0.014561553 | 0.047388402 |
| 202758_s_at | 0.221534524 | 3.897541956 | 0.000252449 | 0.001606041 |
| 202759_s_at | 0.178646696 | 2.641316797 | 0.010572299 | 0.03646989  |
| 202760_s_at | 0.525022567 | 4.872597949 | 8.75E-06    | 9.56E-05    |
| 202761_s_at | 0.349653301 | 4.364657829 | 5.25E-05    | 0.000429509 |
| 202762_at   | -0.54794175 | -7.19435953 | 1.32E-09    | 1.12E-07    |
| 202763_at   | 0.113806432 | 3.581658913 | 0.000694907 | 0.003773146 |
| 202764_at   | -0.1996695  | -5.2649462  | 2.09E-06    | 2.94E-05    |
| 202765_s_at | 0.052593291 | 1.284396192 | 0.204060778 | 0.367056439 |
| 202766_s_at | 0.209020523 | 5.336783389 | 1.60E-06    | 2.36E-05    |
| 202767_at   | -0.08166825 | -2.10263863 | 0.039805449 | 0.106487797 |
| 202768_at   | -0.27006901 | -4.76513222 | 1.29E-05    | 0.000131492 |
| 202769_at   | -0.11209053 | -1.68846868 | 0.096639729 | 0.212080666 |
| 202770_s_at | -0.2001696  | -2.78880637 | 0.007124923 | 0.026432575 |
| 202771_at   | 0.31751394  | 4.688688798 | 1.69E-05    | 0.000165275 |
| 202772_at   | 0.166412677 | 4.421154993 | 4.32E-05    | 0.000364045 |
| 202773_s_at | 0.100431834 | 2.349381512 | 0.022197168 | 0.067015865 |
| 202774_s_at | 0.194373541 | 4.176601425 | 9.97E-05    | 0.000734888 |
| 202775_s_at | 0.141824786 | 3.428972753 | 0.001115472 | 0.005578856 |
| 202776_at   | 0.027703696 | 0.708757512 | 0.481286752 | 0.656563216 |
| 202777_at   | -0.09133655 | -1.08392144 | 0.282841768 | 0.460183704 |
| 202778_s_at | 0.129639485 | 2.060945926 | 0.043757727 | 0.114914815 |
| 202779_s_at | -0.30095908 | -3.87973109 | 0.000267585 | 0.001687205 |
| 202780_at   | -0.44256393 | -6.05308076 | 1.08E-07    | 2.68E-06    |
| 202781_s_at | -0.03888002 | -0.84117353 | 0.403672186 | 0.585991403 |
| 202782_s_at | 0.034418912 | 1.143347057 | 0.257546624 | 0.431244457 |
| 202783_at   | -0.27592319 | -5.23644233 | 2.32E-06    | 3.20E-05    |
| 202784_s_at | -0.39592243 | -4.45153944 | 3.88E-05    | 0.000334487 |
| 202785_at   | -0.21499029 | -3.43214339 | 0.001104688 | 0.005532353 |
| 202786_at   | -0.01947129 | -0.29875671 | 0.766183194 | 0.865709139 |
| 202787_s_at | 0.156475444 | 3.535868148 | 0.000801802 | 0.004237218 |
| 202788_at   | 0.22432772  | 5.082693372 | 4.09E-06    | 5.10E-05    |
| 202789_at   | 0.146838071 | 3.671505509 | 0.000523341 | 0.002977565 |
| 202790_at   | -0.01427944 | -0.3917408  | 0.696671545 | 0.820495235 |
| 202791_s_at | -0.00974158 | -0.31686258 | 0.752474636 | 0.857460388 |
| 202792_s_at | 0.054685442 | 1.167370878 | 0.247791506 | 0.419830843 |
| 202793_at   | -0.01708761 | -0.47687952 | 0.635222541 | 0.777574215 |
| 202794_at   | 0.221763124 | 2.915714601 | 0.005021891 | 0.019789998 |
| 202795_x_at | 0.223643836 | 5.458144942 | 1.02E-06    | 1.63E-05    |
| 202796_at   | 0.092733517 | 1.808054334 | 0.075733415 | 0.175955385 |

|             |             |             |             |             |
|-------------|-------------|-------------|-------------|-------------|
| 202797_at   | 0.050915099 | 0.765748725 | 0.446901029 | 0.626758114 |
| 202798_at   | 0.135769002 | 1.5463506   | 0.127406909 | 0.261206708 |
| 202799_at   | 0.023455056 | 0.711847313 | 0.479385384 | 0.654793999 |
| 2028_s_at   | 0.047584071 | 1.380389044 | 0.172713029 | 0.326173281 |
| 202800_at   | 0.412794687 | 4.38527522  | 4.89E-05    | 0.000403635 |
| 202801_at   | -0.04363353 | -1.09902464 | 0.276254746 | 0.452646945 |
| 202802_at   | -0.27850326 | -4.638556   | 2.02E-05    | 0.000192574 |
| 202803_s_at | 0.219160058 | 2.205559408 | 0.031352691 | 0.088198808 |
| 202804_at   | 0.112274904 | 3.456213113 | 0.001025991 | 0.005208858 |
| 202805_s_at | -0.01852625 | -0.59914584 | 0.551386345 | 0.714008013 |
| 202806_at   | -0.2934764  | -5.42768887 | 1.14E-06    | 1.78E-05    |
| 202807_s_at | 0.025816402 | 0.713306214 | 0.478489085 | 0.654024351 |
| 202808_at   | 0.304065392 | 5.249707901 | 2.21E-06    | 3.08E-05    |
| 202809_s_at | 0.031024842 | 0.725931537 | 0.470771879 | 0.647289691 |
| 202810_at   | -0.10201017 | -3.23535774 | 0.001999764 | 0.009109517 |
| 202811_at   | 0.0314783   | 0.54121712  | 0.59041079  | 0.744501976 |
| 202812_at   | 0.154069209 | 3.482817015 | 0.000945207 | 0.004863926 |
| 202813_at   | -0.21106137 | -3.05696953 | 0.00336607  | 0.014160054 |
| 202814_s_at | 0.144527465 | 2.012618732 | 0.048760173 | 0.125039572 |
| 202815_s_at | 0.046352607 | 0.856159156 | 0.395399189 | 0.578037374 |
| 202816_s_at | 0.039840877 | 0.587823202 | 0.558910797 | 0.720602714 |
| 202817_s_at | 0.169709737 | 1.876094636 | 0.06562842  | 0.157776511 |
| 202818_s_at | 0.059751007 | 1.083380814 | 0.28307956  | 0.460469215 |
| 202819_s_at | 0.030285952 | 0.686396786 | 0.495171584 | 0.668423363 |
| 202820_at   | 0.112967864 | 2.206330494 | 0.031295834 | 0.08807767  |
| 202821_s_at | -0.00795743 | -0.19563036 | 0.84557666  | 0.915221192 |
| 202822_at   | 0.433528988 | 6.85621565  | 4.89E-09    | 2.74E-07    |
| 202823_at   | -0.20443211 | -4.23698597 | 8.13E-05    | 0.000618558 |
| 202824_s_at | -0.42061062 | -4.72471797 | 1.49E-05    | 0.000148636 |
| 202825_at   | -0.45162427 | -5.05565484 | 4.51E-06    | 5.55E-05    |
| 202826_at   | 0.023566447 | 0.693904634 | 0.490485267 | 0.664688667 |
| 202827_s_at | 0.093668029 | 1.801374467 | 0.076792235 | 0.177823386 |
| 202828_s_at | -0.01392103 | -0.25072973 | 0.802900629 | 0.889013079 |
| 202829_s_at | 0.00437155  | 0.058414695 | 0.953617167 | 0.976158004 |
| 202830_s_at | 0.068493214 | 1.99884602  | 0.050273075 | 0.128008446 |
| 202831_at   | -0.04680303 | -0.7970353  | 0.428649983 | 0.60981659  |
| 202832_at   | -0.39554365 | -5.69154224 | 4.26E-07    | 7.97E-06    |
| 202833_s_at | 0.168128207 | 1.359624911 | 0.179160419 | 0.334896376 |
| 202834_at   | 0.665787729 | 6.045075343 | 1.11E-07    | 2.74E-06    |
| 202835_at   | -0.08838687 | -1.74456824 | 0.086305973 | 0.194714582 |
| 202836_s_at | -0.23282978 | -3.74935393 | 0.00040815  | 0.002413793 |
| 202837_at   | 0.150916364 | 4.888133383 | 8.27E-06    | 9.12E-05    |
| 202838_at   | -0.05124333 | -1.12575101 | 0.264863022 | 0.43978519  |
| 202839_s_at | -0.08015026 | -1.2284807  | 0.224180368 | 0.391293987 |
| 202840_at   | 0.128023523 | 2.47153932  | 0.01638094  | 0.052285171 |
| 202841_x_at | 0.007735544 | 0.239032157 | 0.811915144 | 0.894495677 |
| 202842_s_at | -0.13504774 | -1.54188174 | 0.128488684 | 0.262870967 |
| 202843_at   | -0.1457957  | -1.73334288 | 0.08829712  | 0.198061377 |
| 202844_s_at | 0.250779095 | 4.834889815 | 1.00E-05    | 0.000107013 |
| 202845_s_at | 0.28402865  | 4.802347029 | 1.13E-05    | 0.000117722 |
| 202846_s_at | 0.000132019 | 0.003942452 | 0.996867785 | 0.998565874 |
| 202847_at   | 0.158696768 | 3.674867943 | 0.00051778  | 0.002949731 |
| 202848_s_at | -0.08026283 | -2.20059714 | 0.031720771 | 0.089054884 |
| 202849_x_at | 0.047812708 | 1.446555422 | 0.153352538 | 0.298931625 |
| 202850_at   | 0.317282677 | 4.704320272 | 1.60E-05    | 0.000158539 |
| 202851_at   | 0.066401248 | 1.481200194 | 0.143913592 | 0.285611916 |
| 202852_s_at | -0.09966093 | -1.86328914 | 0.067438093 | 0.16111562  |
| 202853_s_at | 0.32823274  | 6.109416675 | 8.71E-08    | 2.26E-06    |
| 202854_at   | -0.97496803 | -6.19076465 | 6.38E-08    | 1.78E-06    |
| 202855_s_at | 0.005070501 | 0.081300444 | 0.935480224 | 0.966513678 |
| 202856_s_at | 0.106768645 | 1.395949686 | 0.167999143 | 0.319743536 |
| 202857_at   | -0.09884573 | -1.69266927 | 0.095832296 | 0.210712239 |
| 202858_at   | 0.234431503 | 5.2720591   | 2.04E-06    | 2.88E-05    |
| 202859_x_at | 0.130779922 | 1.180599186 | 0.242534639 | 0.41316402  |
| 202860_at   | -0.05629215 | -1.28404426 | 0.204183054 | 0.367208271 |
| 202861_at   | 0.119772743 | 2.267543804 | 0.027062073 | 0.078403875 |
| 202862_at   | 0.148024808 | 2.944296191 | 0.004635561 | 0.018535608 |
| 202863_at   | 0.149036364 | 2.891679044 | 0.005369664 | 0.020896991 |
| 202864_s_at | 0.197539726 | 4.125521627 | 0.000118474 | 0.000851121 |
| 202865_at   | -0.01450894 | -0.58609454 | 0.560064066 | 0.721575579 |
| 202866_at   | -0.0422906  | -1.37989806 | 0.172863399 | 0.326320921 |
| 202867_s_at | -0.06052443 | -1.54939199 | 0.126674847 | 0.260172438 |
| 202868_s_at | -0.24713946 | -3.46642215 | 0.000994245 | 0.005069571 |
| 202869_at   | 0.013871112 | 0.214555526 | 0.83085919  | 0.906320384 |
| 202870_s_at | 0.075898827 | 2.039252191 | 0.045945525 | 0.119494728 |



|             |             |             |             |             |
|-------------|-------------|-------------|-------------|-------------|
| 202871_at   | 0.207540114 | 3.958377994 | 0.000206715 | 0.001353427 |
| 202872_at   | -0.10068229 | -2.1115671  | 0.039000649 | 0.104729736 |
| 202873_at   | -0.17047721 | -3.36172618 | 0.001369096 | 0.006630651 |
| 202874_s_at | -0.2571674  | -3.74126875 | 0.000418877 | 0.002464831 |
| 202875_s_at | -0.1279826  | -2.00515102 | 0.049575547 | 0.126629156 |
| 202876_s_at | -0.09586693 | -2.11287946 | 0.038883558 | 0.104503215 |
| 202877_s_at | 0.055556014 | 0.916391673 | 0.36321963  | 0.546349361 |
| 202878_s_at | 0.251894072 | 1.878359919 | 0.065312602 | 0.157211764 |
| 202879_s_at | 0.012607653 | 0.363621025 | 0.717450357 | 0.83463311  |
| 202880_s_at | 0.147308921 | 2.17728385  | 0.03350138  | 0.092979177 |
| 202881_x_at | -0.0735471  | -1.56972688 | 0.121866184 | 0.252454041 |
| 202882_x_at | -0.14532531 | -2.40563027 | 0.019321942 | 0.059942818 |
| 202883_s_at | 0.377152123 | 5.255305969 | 2.17E-06    | 3.02E-05    |
| 202884_s_at | 0.040022098 | 1.008113196 | 0.317547141 | 0.498921316 |
| 202885_s_at | 0.000300977 | 0.008096066 | 0.99356786  | 0.997070502 |
| 202886_s_at | 0.073996088 | 1.681627555 | 0.097966664 | 0.214161913 |
| 202887_s_at | 0.808603409 | 4.068386602 | 0.000143478 | 0.000997251 |
| 202888_s_at | 0.006153895 | 0.219045674 | 0.827376057 | 0.904195886 |
| 202889_x_at | -0.01395281 | -0.20895907 | 0.835205285 | 0.909017719 |
| 202890_at   | 0.229951399 | 2.792227435 | 0.007058919 | 0.026226388 |
| 202891_at   | 0.024481692 | 0.888264935 | 0.378031934 | 0.560526242 |
| 202892_at   | 0.097998408 | 1.551440113 | 0.126183758 | 0.259457764 |
| 202893_at   | -0.14415782 | -2.82472224 | 0.006459487 | 0.024351531 |
| 202894_at   | 0.087053121 | 1.779766096 | 0.08030247  | 0.184271821 |
| 202895_s_at | -0.07741745 | -1.67236867 | 0.099786299 | 0.217247139 |
| 202896_s_at | 0.05977475  | 1.326997102 | 0.189660125 | 0.348345469 |
| 202897_at   | 0.177423904 | 2.769894256 | 0.007500163 | 0.027561033 |
| 202898_at   | 0.15390347  | 1.391652054 | 0.169291039 | 0.321405291 |
| 202899_s_at | -0.1180277  | -1.32957922 | 0.188812603 | 0.347159784 |
| 202900_s_at | -0.00959973 | -0.27670456 | 0.782981194 | 0.875997219 |
| 202901_x_at | 0.072354217 | 3.016151179 | 0.00378289  | 0.015648023 |
| 202902_s_at | 0.075761578 | 1.240406503 | 0.219771479 | 0.386638765 |
| 202903_at   | 0.019441518 | 0.435206464 | 0.665012217 | 0.798207461 |
| 202904_s_at | 0.014027662 | 0.375806563 | 0.708418532 | 0.828236997 |
| 202905_x_at | 0.039476539 | 0.701842402 | 0.485557314 | 0.660373314 |
| 202906_s_at | 0.007101618 | 0.126961365 | 0.899405877 | 0.946239347 |
| 202907_s_at | -0.04595236 | -0.60550541 | 0.547182607 | 0.710772863 |
| 202908_at   | 0.252793821 | 2.56164974  | 0.013012803 | 0.043226415 |
| 202909_at   | 0.042631169 | 0.86632742  | 0.389845975 | 0.572760923 |
| 202910_s_at | 0.107861566 | 2.213198064 | 0.030793432 | 0.08688258  |
| 202911_at   | 0.315276287 | 5.21124253  | 2.55E-06    | 3.46E-05    |
| 202912_at   | 0.409676249 | 1.741557509 | 0.086836329 | 0.195611724 |
| 202913_at   | -0.09278118 | -2.43271007 | 0.018060591 | 0.056742631 |
| 202914_s_at | -0.15663228 | -3.41491043 | 0.001164513 | 0.005783998 |
| 202915_s_at | -0.30617919 | -4.84008098 | 9.84E-06    | 0.000105359 |
| 202916_s_at | -0.23608205 | -4.21899352 | 8.64E-05    | 0.000651364 |
| 202917_s_at | 0.593749181 | 1.889143336 | 0.063826789 | 0.15440037  |
| 202918_s_at | 0.031327252 | 0.285741409 | 0.776084405 | 0.871805057 |
| 202919_at   | -0.16483595 | -3.290994   | 0.001694213 | 0.007931055 |
| 202920_at   | -0.0443436  | -0.79139187 | 0.431908837 | 0.612770063 |
| 202921_s_at | -0.40010975 | -5.04686177 | 4.66E-06    | 5.69E-05    |
| 202922_at   | -0.05479875 | -0.76526729 | 0.447185373 | 0.626929328 |
| 202923_s_at | -0.0471265  | -0.59456602 | 0.554423702 | 0.716757423 |
| 202924_s_at | -0.00824921 | -0.18879455 | 0.850906554 | 0.918168808 |
| 202925_s_at | 0.031533121 | 0.612764653 | 0.542404143 | 0.707205957 |
| 202926_at   | -0.08378161 | -1.82281263 | 0.073437365 | 0.171826748 |
| 202927_at   | -0.52243781 | -6.37255582 | 3.17E-08    | 1.04E-06    |
| 202928_s_at | -0.03527204 | -0.78653501 | 0.434725226 | 0.615417796 |
| 202929_s_at | -0.11863453 | -1.89429786 | 0.063126738 | 0.153088986 |
| 202930_s_at | -0.46613037 | -4.88453493 | 8.38E-06    | 9.22E-05    |
| 202931_x_at | 0.328342467 | 4.014747334 | 0.000171541 | 0.001157733 |
| 202932_at   | 0.328367539 | 3.915975624 | 0.000237652 | 0.001527779 |
| 202933_s_at | 0.463079012 | 5.869342331 | 2.17E-07    | 4.61E-06    |
| 202934_at   | 0.13968847  | 2.046586253 | 0.04519554  | 0.11787343  |
| 202935_s_at | 0.798991719 | 6.437450105 | 2.47E-08    | 8.57E-07    |
| 202936_s_at | 0.574361953 | 5.879318494 | 2.09E-07    | 4.48E-06    |
| 202937_x_at | -0.17935823 | -3.6667147  | 0.000531363 | 0.003015575 |
| 202938_x_at | 0.005052506 | 0.1294711   | 0.897428526 | 0.945020226 |
| 202939_at   | 0.138917497 | 2.504718586 | 0.015058669 | 0.048771797 |
| 202940_at   | 0.194851781 | 2.981134068 | 0.004178309 | 0.01701476  |
| 202941_at   | -0.39494701 | -5.22945965 | 2.38E-06    | 3.27E-05    |
| 202942_at   | -0.10183199 | -1.99965154 | 0.050183491 | 0.127814344 |
| 202943_s_at | 0.058018951 | 1.464960095 | 0.148279736 | 0.291847237 |
| 202944_at   | 0.047879407 | 1.227340036 | 0.224605439 | 0.391775282 |
| 202945_at   | 0.101137715 | 2.170385304 | 0.034044822 | 0.094218292 |

|             |             |             |             |             |
|-------------|-------------|-------------|-------------|-------------|
| 202946_s_at | 0.182263857 | 1.368193575 | 0.176477884 | 0.331198018 |
| 202947_s_at | 0.088103563 | 1.939505655 | 0.057261311 | 0.141842507 |
| 202948_at   | 0.218476587 | 2.328793175 | 0.023341429 | 0.069819635 |
| 202949_s_at | -0.07513884 | -1.68279317 | 0.097739526 | 0.213801326 |
| 202950_at   | 0.206028774 | 2.64693601  | 0.010417023 | 0.036042237 |
| 202951_at   | 0.343873443 | 6.188468045 | 6.44E-08    | 1.79E-06    |
| 202952_s_at | -0.04900521 | -1.61722345 | 0.11120415  | 0.235821394 |
| 202953_at   | 0.441548427 | 2.23364059  | 0.029339743 | 0.083631086 |
| 202954_at   | 0.023241608 | 0.465208239 | 0.643507527 | 0.783449247 |
| 202955_s_at | -0.06848898 | -2.16459057 | 0.034507268 | 0.095215089 |
| 202956_at   | -0.01383312 | -0.32773597 | 0.744280029 | 0.851920397 |
| 202957_at   | 0.478737893 | 3.29359232  | 0.00168108  | 0.007881957 |
| 202958_at   | -0.11339446 | -2.27952548 | 0.026295383 | 0.076749822 |
| 202959_at   | -0.05169052 | -0.68999121 | 0.492924926 | 0.666640465 |
| 202960_s_at | 0.278353898 | 3.649859256 | 0.000560529 | 0.003154658 |
| 202961_s_at | -0.17074656 | -3.31119281 | 0.001594612 | 0.007542214 |
| 202962_at   | 0.382861892 | 5.004832974 | 5.42E-06    | 6.44E-05    |
| 202963_at   | 0.053881702 | 1.451515486 | 0.151972271 | 0.297006503 |
| 202964_s_at | 0.018571498 | 0.47393078  | 0.637311374 | 0.779067832 |
| 202965_s_at | -0.01672829 | -0.40359158 | 0.68798289  | 0.814002894 |
| 202966_at   | -0.02069853 | -0.77163994 | 0.443430115 | 0.623656735 |
| 202967_at   | -0.28666526 | -3.85469156 | 0.000290347 | 0.00181156  |
| 202968_s_at | 0.039361663 | 0.992561683 | 0.32500685  | 0.507182728 |
| 202969_at   | 0.009654188 | 0.225409349 | 0.822445554 | 0.901342244 |
| 202970_at   | 0.01192246  | 0.388034591 | 0.6993973   | 0.822240277 |
| 202971_s_at | 0.052851187 | 1.415815282 | 0.162125897 | 0.311282837 |
| 202972_s_at | 0.295774892 | 4.072827104 | 0.000141365 | 0.000985936 |
| 202973_x_at | 0.400954698 | 5.056601844 | 4.49E-06    | 5.53E-05    |
| 202974_at   | -0.24756827 | -5.04144658 | 4.75E-06    | 5.78E-05    |
| 202975_s_at | 0.845921572 | 8.378398627 | 1.33E-11    | 6.25E-09    |
| 202976_s_at | 0.683682653 | 6.227051341 | 5.55E-08    | 1.59E-06    |
| 202977_s_at | -0.04922651 | -1.63944439 | 0.106481984 | 0.22814578  |
| 202978_s_at | 0.076316878 | 0.240184736 | 0.811025772 | 0.893978636 |
| 202979_s_at | 0.044879019 | 0.553860132 | 0.581783156 | 0.737806896 |
| 202980_s_at | 0.098192255 | 3.230487164 | 0.00202885  | 0.009215877 |
| 202981_x_at | 0.107308927 | 2.150110676 | 0.035686962 | 0.097728045 |
| 202982_s_at | 0.129022608 | 1.805902936 | 0.076073089 | 0.176496834 |
| 202983_at   | 0.006208538 | 0.080141004 | 0.936398336 | 0.966948115 |
| 202984_s_at | 0.076310237 | 1.656385724 | 0.102992404 | 0.222589899 |
| 202985_s_at | -0.02781194 | -0.60153647 | 0.549804206 | 0.712826712 |
| 202986_at   | -0.14395415 | -2.40042716 | 0.019573152 | 0.060528315 |
| 202987_at   | 0.035246977 | 1.60402114  | 0.114089152 | 0.240340653 |
| 202988_s_at | 0.567415677 | 2.318390888 | 0.023939306 | 0.071251077 |
| 202989_at   | 0.025430761 | 1.162709474 | 0.24966328  | 0.422109966 |
| 202990_at   | 0.086679898 | 1.771131517 | 0.081742051 | 0.186674285 |
| 202991_at   | 0.072166884 | 1.41851186  | 0.161341058 | 0.310229083 |
| 202992_at   | 0.056673177 | 1.786844739 | 0.079138114 | 0.182076735 |
| 202993_at   | 0.002934138 | 0.057749737 | 0.954144562 | 0.976362422 |
| 202994_s_at | 0.227183249 | 3.212126015 | 0.002142116 | 0.009655616 |
| 202995_s_at | 0.217050033 | 2.262149144 | 0.027413685 | 0.079186427 |
| 202996_at   | 0.028059757 | 0.737417177 | 0.463812934 | 0.641629923 |
| 202997_s_at | -0.00622049 | -0.11282442 | 0.910555597 | 0.952859114 |
| 202998_s_at | 0.038939243 | 1.030815771 | 0.306865482 | 0.487074792 |
| 202999_s_at | -0.02959232 | -0.63500243 | 0.527899961 | 0.695709632 |
| 203000_at   | -1.28846679 | -6.08010206 | 9.74E-08    | 2.47E-06    |
| 203001_s_at | -1.13648187 | -5.59328786 | 6.16E-07    | 1.07E-05    |
| 203002_at   | 0.509043742 | 6.145463076 | 7.59E-08    | 2.03E-06    |
| 203003_at   | -0.06292034 | -1.33219299 | 0.187957609 | 0.346128867 |
| 203004_s_at | -0.07620193 | -1.96629206 | 0.05401025  | 0.135539677 |
| 203005_at   | 0.015620982 | 0.333047327 | 0.740287891 | 0.849294701 |
| 203006_at   | -1.12529818 | -7.8581503  | 9.96E-11    | 2.10E-08    |
| 203007_x_at | 0.239102438 | 3.527689578 | 0.000822473 | 0.004329558 |
| 203008_x_at | -0.20084168 | -1.95602046 | 0.055237745 | 0.137969335 |
| 203009_at   | 0.026251286 | 0.431498236 | 0.66769042  | 0.799824856 |
| 203010_at   | 0.148640676 | 3.721820784 | 0.000445796 | 0.002598567 |
| 203011_at   | 0.14850095  | 1.497473587 | 0.139640566 | 0.279481244 |
| 203012_x_at | -0.06224839 | -1.61736695 | 0.111173121 | 0.235777969 |
| 203013_at   | -0.26241096 | -7.90741687 | 8.23E-11    | 1.90E-08    |
| 203014_x_at | -0.03818425 | -1.12827539 | 0.263804457 | 0.438663124 |
| 203015_s_at | -0.22485926 | -5.52745836 | 7.89E-07    | 1.32E-05    |
| 203016_s_at | -0.45612694 | -5.98360756 | 1.41E-07    | 3.30E-06    |
| 203017_s_at | -0.80416399 | -7.8395899  | 1.07E-10    | 2.18E-08    |
| 203018_s_at | -0.68227804 | -6.96148996 | 3.25E-09    | 2.04E-07    |
| 203019_x_at | -0.56155332 | -5.93673715 | 1.68E-07    | 3.78E-06    |
| 203020_at   | -0.38828874 | -4.2207998  | 8.59E-05    | 0.000647692 |

|             |             |             |             |             |
|-------------|-------------|-------------|-------------|-------------|
| 203021_at   | 0.029041148 | 0.672745377 | 0.503755145 | 0.675847291 |
| 203022_at   | -0.01390825 | -0.4324366  | 0.667012289 | 0.799498825 |
| 203023_at   | -0.11327855 | -3.2441472  | 0.001948267 | 0.008914912 |
| 203024_s_at | 0.206685899 | 2.916259577 | 0.005014254 | 0.019761643 |
| 203025_at   | 0.095289787 | 2.511271188 | 0.014809226 | 0.048064917 |
| 203026_at   | 0.238236826 | 6.597260192 | 1.33E-08    | 5.55E-07    |
| 203027_s_at | -0.0470235  | -1.04884664 | 0.298557758 | 0.477735171 |
| 203028_s_at | 0.225960995 | 4.003477593 | 0.000178076 | 0.001194625 |
| 203029_s_at | -0.67577181 | -6.06093366 | 1.05E-07    | 2.61E-06    |
| 203030_s_at | -0.5003557  | -5.72965171 | 3.69E-07    | 7.07E-06    |
| 203031_s_at | -0.56911121 | -5.81283257 | 2.69E-07    | 5.46E-06    |
| 203032_s_at | -0.09177844 | -3.26403853 | 0.001836297 | 0.008495631 |
| 203033_x_at | -0.15551848 | -4.02919744 | 0.000163499 | 0.001111185 |
| 203034_s_at | 0.024113068 | 0.523957627 | 0.602285318 | 0.753332833 |
| 203035_s_at | 0.21919818  | 5.047448846 | 4.65E-06    | 5.68E-05    |
| 203036_s_at | -0.14388917 | -3.47010593 | 0.00098302  | 0.005024951 |
| 203037_s_at | 0.115180393 | 1.829435541 | 0.072426136 | 0.169997567 |
| 203038_at   | 0.591801891 | 5.889068157 | 2.02E-07    | 4.36E-06    |
| 203039_s_at | -0.20324102 | -2.46093535 | 0.016825083 | 0.053496488 |
| 203040_s_at | 0.016134079 | 0.488839957 | 0.626780638 | 0.771547999 |
| 203041_s_at | 0.311482887 | 2.338424091 | 0.022799778 | 0.068480973 |
| 203042_at   | 0.494519795 | 4.191175901 | 9.49E-05    | 0.000704752 |
| 203043_at   | 0.248562094 | 4.519218689 | 3.07E-05    | 0.000273285 |
| 203044_at   | 0.351688795 | 2.916873681 | 0.00500566  | 0.019738219 |
| 203045_at   | 0.278089438 | 5.907154273 | 1.88E-07    | 4.13E-06    |
| 203046_s_at | 0.089640052 | 2.024671568 | 0.047468527 | 0.12245806  |
| 203047_at   | 0.132162573 | 3.183872837 | 0.002328078 | 0.010354941 |
| 203048_s_at | 0.176263504 | 3.036219138 | 0.003572291 | 0.014887434 |
| 203049_s_at | 0.072365163 | 0.947397362 | 0.347329131 | 0.530330431 |
| 203050_at   | 0.019162222 | 0.440036962 | 0.661530044 | 0.795675226 |
| 203051_at   | 0.046373599 | 2.037040045 | 0.046173841 | 0.119900139 |
| 203052_at   | 0.012541541 | 0.315879233 | 0.753217149 | 0.858022095 |
| 203053_at   | -0.31422792 | -3.82779443 | 0.000316868 | 0.001949003 |
| 203054_s_at | 0.024550561 | 0.649244046 | 0.51871877  | 0.688216692 |
| 203055_s_at | 0.089261334 | 1.76092403  | 0.083471506 | 0.189594129 |
| 203056_s_at | -0.14819808 | -2.86622189 | 0.005762232 | 0.022153107 |
| 203057_s_at | 0.15740215  | 3.287032043 | 0.001714426 | 0.008013088 |
| 203058_s_at | 0.312692197 | 3.685977354 | 0.000499807 | 0.002864133 |
| 203059_s_at | 0.023878697 | 0.472736858 | 0.638157968 | 0.779804755 |
| 203060_s_at | 0.480787997 | 3.777838368 | 0.000372416 | 0.002229607 |
| 203061_s_at | 0.023556505 | 0.788557648 | 0.433551021 | 0.614378281 |
| 203062_s_at | 0.197923867 | 3.928224428 | 0.000228284 | 0.001476268 |
| 203063_at   | 0.1227808   | 3.350421146 | 0.001416761 | 0.00683262  |
| 203064_s_at | -0.02628352 | -0.94688366 | 0.347588654 | 0.53060191  |
| 203065_s_at | 0.118989515 | 2.032035294 | 0.046694    | 0.120940848 |
| 203066_at   | -0.6791027  | -7.60892546 | 2.62E-10    | 3.88E-08    |
| 203067_at   | -0.19728955 | -3.10107966 | 0.002964085 | 0.012711102 |
| 203068_at   | 0.355473511 | 5.622634578 | 5.52E-07    | 9.81E-06    |
| 203069_at   | -0.64647411 | -5.70348822 | 4.07E-07    | 7.68E-06    |
| 203070_at   | 0.047128103 | 1.218199456 | 0.228033044 | 0.395561745 |
| 203071_at   | 0.362517227 | 3.627635062 | 0.000601328 | 0.003343021 |
| 203072_at   | 0.258456997 | 4.152586464 | 0.000108154 | 0.000787103 |
| 203073_at   | 0.153948349 | 3.221095739 | 0.00208606  | 0.00944199  |
| 203074_at   | -0.04006665 | -0.98129507 | 0.330483691 | 0.512988924 |
| 203075_at   | 0.301083404 | 3.947111211 | 0.000214534 | 0.001398884 |
| 203076_s_at | 0.052503603 | 1.294352425 | 0.200624178 | 0.362669005 |
| 203077_s_at | 0.239055653 | 3.790597941 | 0.0003574   | 0.002154718 |
| 203078_at   | -0.13766717 | -4.16225808 | 0.000104681 | 0.000765697 |
| 203079_s_at | -0.13426542 | -3.17828584 | 0.002366603 | 0.01049913  |
| 203080_s_at | 0.438945335 | 6.206361616 | 6.01E-08    | 1.70E-06    |
| 203081_at   | 0.03517043  | 1.086950738 | 0.281511906 | 0.458795579 |
| 203082_at   | 0.004722555 | 0.09684534  | 0.923179871 | 0.959818425 |
| 203083_at   | 0.311395468 | 2.61042364  | 0.011464316 | 0.038980768 |
| 203084_at   | -0.05458416 | -1.16619676 | 0.248262016 | 0.420468623 |
| 203085_s_at | 0.36821717  | 6.112526905 | 8.61E-08    | 2.25E-06    |
| 203086_at   | 0.007629999 | 0.193262091 | 0.847422397 | 0.916134537 |
| 203087_s_at | 0.040414339 | 0.392348509 | 0.696224984 | 0.820172043 |
| 203088_at   | -0.33710779 | -5.05521098 | 4.52E-06    | 5.55E-05    |
| 203089_s_at | 0.017661311 | 0.454453993 | 0.651182028 | 0.788560862 |
| 203090_at   | -0.04099177 | -1.2177521  | 0.228201772 | 0.395681066 |
| 203091_at   | 0.045257478 | 1.304372907 | 0.197209334 | 0.358177737 |
| 203092_at   | -0.01676503 | -0.33832977 | 0.736324591 | 0.846786543 |
| 203093_s_at | 0.032789113 | 0.875279827 | 0.384997259 | 0.567658524 |
| 203094_at   | -0.18737482 | -4.36502796 | 5.24E-05    | 0.000429118 |
| 203095_at   | 0.070840503 | 1.223261809 | 0.22613003  | 0.393641412 |

|             |             |             |             |             |
|-------------|-------------|-------------|-------------|-------------|
| 203096_s_at | 0.125681394 | 0.905433041 | 0.368945896 | 0.55223312  |
| 203097_s_at | -0.02336654 | -0.36543098 | 0.716106234 | 0.833747194 |
| 203098_at   | 0.108102667 | 2.549792298 | 0.013416866 | 0.044354358 |
| 203099_s_at | 0.046387055 | 1.639759146 | 0.106416284 | 0.228069592 |
| 203100_s_at | -0.0384792  | -1.26641514 | 0.210378318 | 0.375128782 |
| 203101_s_at | -0.05540973 | -1.16645966 | 0.248156608 | 0.420353818 |
| 203102_s_at | -0.12047711 | -2.26254607 | 0.027387677 | 0.079121529 |
| 203103_s_at | -0.05781687 | -1.29520096 | 0.200333304 | 0.362261624 |
| 203104_at   | 0.358314291 | 3.393432744 | 0.001243376 | 0.006118582 |
| 203105_s_at | -0.47983026 | -6.26852553 | 4.73E-08    | 1.41E-06    |
| 203106_s_at | -0.11406297 | -3.85965374 | 0.000285694 | 0.001787014 |
| 203107_x_at | -0.07250097 | -1.26122817 | 0.212227438 | 0.377303464 |
| 203108_at   | -0.03373672 | -0.67681896 | 0.501185406 | 0.67353194  |
| 203109_at   | -0.42348628 | -6.80839063 | 5.89E-09    | 3.10E-07    |
| 203110_at   | -0.4762135  | -6.48107789 | 2.09E-08    | 7.59E-07    |
| 203111_s_at | -0.23976409 | -4.5788899  | 2.49E-05    | 0.000229936 |
| 203112_s_at | 0.203798726 | 3.364891557 | 0.001356024 | 0.006580178 |
| 203113_s_at | 0.534178895 | 7.922232629 | 7.77E-11    | 1.82E-08    |
| 203114_at   | -0.17799784 | -2.84611868 | 0.006090815 | 0.023196481 |
| 203115_at   | 0.056392554 | 1.024565498 | 0.30978162  | 0.490375099 |
| 203116_s_at | -0.02235803 | -0.43725011 | 0.663538099 | 0.796959009 |
| 203117_s_at | 0.261394535 | 4.775881477 | 1.24E-05    | 0.000127238 |
| 203118_at   | 0.015008474 | 0.471347426 | 0.639143805 | 0.78062306  |
| 203119_at   | -0.06159803 | -1.41656409 | 0.16190766  | 0.310979355 |
| 203120_at   | 0.409778861 | 4.142301331 | 0.000111969 | 0.000809987 |
| 203122_at   | 0.012670423 | 0.211878908 | 0.832937144 | 0.907622623 |
| 203123_s_at | 0.126246263 | 1.428515447 | 0.158455208 | 0.306133181 |
| 203124_s_at | 0.231319541 | 2.584750141 | 0.012257168 | 0.041171069 |
| 203125_x_at | 0.06356016  | 1.076331805 | 0.286192768 | 0.464094763 |
| 203126_at   | 0.151648598 | 2.877820202 | 0.005580196 | 0.021573541 |
| 203127_s_at | 0.088203648 | 1.597321687 | 0.115576086 | 0.242765731 |
| 203128_at   | 0.085060308 | 1.149779022 | 0.25490845  | 0.428167675 |
| 203129_s_at | -0.34143554 | -3.77147962 | 0.000380123 | 0.002269854 |
| 203130_s_at | -0.36339033 | -5.42193292 | 1.17E-06    | 1.81E-05    |
| 203131_at   | 0.03486757  | 0.377350964 | 0.707276799 | 0.827611561 |
| 203132_at   | 0.230342909 | 2.44925052  | 0.01732703  | 0.054815574 |
| 203133_at   | 0.044377254 | 0.893767222 | 0.375104626 | 0.558247618 |
| 203134_at   | 0.009205868 | 0.230153796 | 0.818774273 | 0.898994998 |
| 203135_at   | 0.022221485 | 0.543916298 | 0.588563795 | 0.743189379 |
| 203136_at   | 0.009209431 | 0.148667042 | 0.882327084 | 0.937050569 |
| 203137_at   | 0.007385911 | 0.075618201 | 0.939980571 | 0.968605305 |
| 203138_at   | 0.197364217 | 1.813886364 | 0.074819003 | 0.174320242 |
| 203139_at   | -0.42810022 | -4.7084096  | 1.57E-05    | 0.000156495 |
| 203140_at   | 0.908499791 | 5.301225712 | 1.83E-06    | 2.63E-05    |
| 203141_s_at | 0.011437097 | 0.351020299 | 0.726832709 | 0.840477307 |
| 203142_s_at | 0.055092258 | 1.865137013 | 0.067174379 | 0.160669113 |
| 203143_s_at | 0.086749349 | 1.548244863 | 0.126950564 | 0.260618953 |
| 203144_s_at | 0.019132294 | 0.538432802 | 0.592318907 | 0.745813845 |
| 203145_at   | -0.06638645 | -1.57125918 | 0.121509846 | 0.251902683 |
| 203146_s_at | -0.6367276  | -7.27229467 | 9.72E-10    | 9.20E-08    |
| 203147_s_at | 0.077640968 | 1.580968676 | 0.119271288 | 0.248349292 |
| 203148_s_at | 0.191892528 | 5.268896599 | 2.06E-06    | 2.91E-05    |
| 203149_at   | 0.079094842 | 1.57251526  | 0.121218368 | 0.251467644 |
| 203150_at   | -0.26313998 | -6.5026621  | 1.92E-08    | 7.18E-07    |
| 203151_at   | -0.45649487 | -6.56083048 | 1.54E-08    | 6.12E-07    |
| 203152_at   | 0.086310999 | 1.182426243 | 0.241814944 | 0.412236554 |
| 203153_at   | -0.01587366 | -0.2324964  | 0.816963045 | 0.897799558 |
| 203154_s_at | 0.000536761 | 0.012853123 | 0.989788659 | 0.995225124 |
| 203155_at   | 0.12893164  | 3.852131284 | 0.000292777 | 0.001824187 |
| 203156_at   | -0.57482552 | -5.92868741 | 1.74E-07    | 3.87E-06    |
| 203157_s_at | -0.61389805 | -5.08585105 | 4.04E-06    | 5.05E-05    |
| 203158_s_at | -0.53618925 | -6.0849528  | 9.57E-08    | 2.44E-06    |
| 203159_at   | -0.89198616 | -5.88207554 | 2.07E-07    | 4.44E-06    |
| 203160_s_at | -0.05973579 | -1.81215769 | 0.075089074 | 0.174757275 |
| 203161_s_at | -0.00393559 | -0.10838652 | 0.914059578 | 0.954246988 |
| 203162_s_at | -0.4328538  | -8.56807351 | 6.39E-12    | 4.52E-09    |
| 203163_at   | -0.45751874 | -5.80046578 | 2.82E-07    | 5.68E-06    |
| 203164_at   | 0.141511368 | 2.279227432 | 0.026314219 | 0.07678474  |
| 203165_s_at | 0.015592891 | 0.44934972  | 0.654837944 | 0.790845198 |
| 203166_at   | -0.0318932  | -0.47430176 | 0.637048412 | 0.778810286 |
| 203167_at   | 0.121285774 | 2.31116653  | 0.024362507 | 0.072245317 |
| 203168_at   | -0.03324117 | -0.65284217 | 0.516412617 | 0.686236699 |
| 203169_at   | 0.078522105 | 2.374457945 | 0.02087123  | 0.063754057 |
| 203170_at   | -0.0198025  | -0.8444391  | 0.401860388 | 0.58423423  |
| 203171_s_at | 0.171111735 | 5.105930721 | 3.75E-06    | 4.76E-05    |

|             |             |             |             |             |
|-------------|-------------|-------------|-------------|-------------|
| 203172_at   | -0.05900638 | -1.4972959  | 0.139686676 | 0.279523458 |
| 203173_s_at | 0.094098829 | 2.689904587 | 0.009296781 | 0.032901665 |
| 203174_s_at | -0.09289734 | -2.00830464 | 0.049229793 | 0.12592705  |
| 203175_at   | 0.195174367 | 3.925034896 | 0.000230689 | 0.001490307 |
| 203176_s_at | 0.078149352 | 1.272202127 | 0.208329438 | 0.372396922 |
| 203177_x_at | 0.110584592 | 2.992775264 | 0.004042774 | 0.016535158 |
| 203178_at   | 0.501509598 | 5.517022634 | 8.20E-07    | 1.36E-05    |
| 203179_at   | -0.09681595 | -2.64787853 | 0.010391183 | 0.035972326 |
| 203180_at   | -0.05743346 | -1.44347028 | 0.15421598  | 0.300105912 |
| 203181_x_at | 0.058198909 | 0.966153189 | 0.337940309 | 0.52076506  |
| 203182_s_at | -0.22610749 | -2.41261607 | 0.018989207 | 0.059111629 |
| 203183_s_at | -0.12190324 | -2.96892581 | 0.004324979 | 0.017506746 |
| 203184_at   | 0.062767936 | 1.736283563 | 0.087771866 | 0.197303424 |
| 203185_at   | 0.273499194 | 2.872477152 | 0.005663384 | 0.021827179 |
| 203186_s_at | 0.279295276 | 4.817536464 | 1.07E-05    | 0.000112541 |
| 203187_at   | 0.148740186 | 2.924295175 | 0.004902882 | 0.019410011 |
| 203188_at   | -0.29846617 | -3.62166137 | 0.000612769 | 0.003397328 |
| 203189_s_at | -0.40401152 | -6.02160728 | 1.22E-07    | 2.95E-06    |
| 203190_at   | -0.32784351 | -4.4437901  | 3.99E-05    | 0.000341445 |
| 203191_at   | -0.03473507 | -0.68696728 | 0.494814628 | 0.668306297 |
| 203192_at   | -0.1170667  | -2.93435831 | 0.004766646 | 0.018959678 |
| 203193_at   | -0.08514142 | -1.49786852 | 0.139538124 | 0.279326249 |
| 203194_s_at | 0.067617381 | 1.688699265 | 0.096595262 | 0.211993491 |
| 203195_s_at | 0.147026281 | 4.692536398 | 1.67E-05    | 0.000163499 |
| 203196_at   | 0.143047549 | 3.260980344 | 0.001853108 | 0.008564541 |
| 203197_s_at | -0.05663796 | -1.45995851 | 0.149645117 | 0.293704253 |
| 203198_at   | 0.144000008 | 2.622471426 | 0.011108596 | 0.037967678 |
| 203199_s_at | -0.07543878 | -1.70501318 | 0.093491571 | 0.206851495 |
| 203200_s_at | 0.10496934  | 1.658388256 | 0.102586157 | 0.22193729  |
| 203201_at   | -0.05532078 | -1.41838049 | 0.161379224 | 0.310249667 |
| 203202_at   | 0.100971641 | 1.458685805 | 0.149994116 | 0.294208341 |
| 203203_s_at | 0.036481486 | 1.107889472 | 0.272438841 | 0.448399377 |
| 203204_s_at | -0.05961796 | -1.47352976 | 0.145963021 | 0.288484881 |
| 203205_at   | -0.07232841 | -1.6556013  | 0.103151894 | 0.222818831 |
| 203206_at   | 0.164737454 | 3.591991075 | 0.000672739 | 0.003672415 |
| 203207_s_at | 0.081088382 | 1.29219552  | 0.201364978 | 0.363509422 |
| 203208_s_at | 0.094044615 | 3.253929597 | 0.001892421 | 0.00870572  |
| 203209_at   | 0.11955963  | 2.930656468 | 0.004816348 | 0.019130131 |
| 203210_s_at | 0.021543372 | 0.678178249 | 0.50032951  | 0.672907596 |
| 203211_s_at | 0.100702732 | 1.74814435  | 0.085679511 | 0.193588914 |
| 203212_s_at | 0.048610052 | 0.923014299 | 0.359786884 | 0.542932727 |
| 203213_at   | 0.045298025 | 1.964232014 | 0.054254545 | 0.135992379 |
| 203214_x_at | -0.08280749 | -1.50669567 | 0.137263887 | 0.276034812 |
| 203215_s_at | 0.250993455 | 3.389054981 | 0.00126006  | 0.006184338 |
| 203216_s_at | 0.461741481 | 4.090889259 | 0.000133075 | 0.00093822  |
| 203217_s_at | -0.29189714 | -4.43569162 | 4.10E-05    | 0.00034911  |
| 203218_at   | -0.53925589 | -5.84696131 | 2.37E-07    | 4.92E-06    |
| 203219_s_at | 0.075985161 | 1.952933525 | 0.055611276 | 0.138685292 |
| 203220_s_at | -0.04410313 | -1.18754939 | 0.239805114 | 0.409669743 |
| 203221_at   | 0.067211921 | 1.153409383 | 0.253427938 | 0.426371849 |
| 203222_s_at | -0.02529818 | -0.62316824 | 0.535593294 | 0.701957053 |
| 203223_at   | 0.014390364 | 0.484151437 | 0.630083995 | 0.774001262 |
| 203224_at   | -0.60904574 | -5.6432617  | 5.11E-07    | 9.21E-06    |
| 203225_s_at | -0.47398058 | -6.19699626 | 6.23E-08    | 1.75E-06    |
| 203226_s_at | -0.12194749 | -2.94682213 | 0.004602781 | 0.018425416 |
| 203227_s_at | 0.11336815  | 2.598918885 | 0.011813651 | 0.039937645 |
| 203228_at   | -0.12694505 | -3.5141392  | 0.000857839 | 0.004484042 |
| 203229_s_at | 0.130605552 | 4.91949523  | 7.39E-06    | 8.34E-05    |
| 203230_at   | -0.05088115 | -0.78514215 | 0.435534918 | 0.616115169 |
| 203231_s_at | -0.201827   | -1.78944236 | 0.078714382 | 0.181305064 |
| 203232_s_at | -0.32043318 | -4.97048151 | 6.14E-06    | 7.14E-05    |
| 203233_at   | 0.216076055 | 3.161355901 | 0.002487031 | 0.010945388 |
| 203234_at   | 0.006783566 | 0.112699853 | 0.910653927 | 0.952869107 |
| 203235_at   | -0.07929008 | -1.99094258 | 0.051159341 | 0.129777886 |
| 203236_s_at | 0.123482879 | 2.369272059 | 0.021139484 | 0.064423174 |
| 203237_s_at | -0.02256061 | -0.86163208 | 0.392404178 | 0.575208541 |
| 203238_s_at | 0.305819264 | 3.960658751 | 0.000205166 | 0.001344664 |
| 203239_s_at | 0.051751704 | 1.082185005 | 0.283606027 | 0.461088816 |
| 203240_at   | 0.269659135 | 1.474326811 | 0.145749    | 0.288209119 |
| 203241_at   | -0.00794282 | -0.10272349 | 0.918533351 | 0.956991154 |
| 203242_s_at | 0.078233166 | 1.163734801 | 0.249250696 | 0.421698285 |
| 203243_s_at | 0.23604977  | 2.610445351 | 0.011463666 | 0.038980768 |
| 203244_at   | 0.138173846 | 2.339352099 | 0.022748183 | 0.068333229 |
| 203245_s_at | 0.108033719 | 1.5700936   | 0.121780826 | 0.252304515 |
| 203246_s_at | 0.011788377 | 0.341268248 | 0.734123017 | 0.8451743   |

|             |              |             |             |             |
|-------------|--------------|-------------|-------------|-------------|
| 203247_s_at | 0.310551042  | 5.077654607 | 4.16E-06    | 5.18E-05    |
| 203248_at   | -0.03719097  | -0.95023835 | 0.345896141 | 0.52901794  |
| 203249_at   | 0.104210946  | 3.6902528   | 0.00049305  | 0.002831188 |
| 203250_at   | 0.221546305  | 2.994716066 | 0.00402058  | 0.016457938 |
| 203252_at   | 0.318182826  | 3.907169522 | 0.000244613 | 0.00156488  |
| 203253_s_at | 0.062612065  | 1.222790195 | 0.226306824 | 0.393850305 |
| 203254_s_at | 0.328172128  | 5.193998532 | 2.72E-06    | 3.64E-05    |
| 203255_at   | 0.234662116  | 3.14427494  | 0.002614344 | 0.01142692  |
| 203256_at   | -0.03818119  | -0.8663601  | 0.389828205 | 0.572759621 |
| 203257_s_at | -0.02583058  | -0.67555574 | 0.501981518 | 0.674176098 |
| 203258_at   | -0.2923083   | -5.34743862 | 1.54E-06    | 2.28E-05    |
| 203259_s_at | 0.147868358  | 2.378270028 | 0.020675985 | 0.063239194 |
| 203260_at   | -0.13153279  | -2.68232602 | 0.009485988 | 0.033437005 |
| 203261_at   | -0.19315395  | -2.27636068 | 0.026496    | 0.077189182 |
| 203262_s_at | 0.328515712  | 6.06594694  | 1.03E-07    | 2.58E-06    |
| 203263_s_at | -0.6114976   | -7.00390234 | 2.76E-09    | 1.80E-07    |
| 203264_s_at | -1.00222095  | -6.97314091 | 3.11E-09    | 1.97E-07    |
| 203265_s_at | -0.34640885  | -5.55552147 | 7.10E-07    | 1.20E-05    |
| 203266_s_at | -0.4746377   | -4.9995746  | 5.53E-06    | 6.54E-05    |
| 203267_s_at | 0.023926214  | 0.786569115 | 0.434705412 | 0.615409239 |
| 203268_s_at | 0.012659724  | 0.402168573 | 0.689023998 | 0.814717055 |
| 203269_at   | -0.14380242  | -2.74858423 | 0.007944707 | 0.028921139 |
| 203270_at   | 0.102120929  | 2.229168082 | 0.029652509 | 0.08431366  |
| 203271_s_at | -0.03574944  | -0.95225858 | 0.344879498 | 0.527782308 |
| 203272_s_at | -0.11456114  | -3.20884667 | 0.002162961 | 0.009735829 |
| 203273_s_at | -0.10721669  | -2.86699079 | 0.005749996 | 0.022119025 |
| 203274_at   | -0.52199583  | -8.4516066  | 1.00E-11    | 5.45E-09    |
| 203275_at   | 0.394249686  | 7.097013003 | 1.92E-09    | 1.41E-07    |
| 203276_at   | 0.005287229  | 0.132753234 | 0.89484361  | 0.943783829 |
| 203277_at   | 0.085384358  | 1.72568256  | 0.089677593 | 0.200452184 |
| 203278_s_at | 0.329306027  | 5.953887765 | 1.58E-07    | 3.58E-06    |
| 203279_at   | -0.15799977  | -4.19024486 | 9.52E-05    | 0.000706626 |
| 203280_at   | 0.190649288  | 2.952259386 | 0.004532948 | 0.018208385 |
| 203281_s_at | 0.163583524  | 3.497753255 | 0.00090254  | 0.004681016 |
| 203282_at   | 0.22055619   | 3.271990014 | 0.001793257 | 0.008322353 |
| 203283_s_at | 0.026087313  | 0.801662265 | 0.425989079 | 0.607394744 |
| 203284_s_at | -0.29233305  | -3.24920073 | 0.001919226 | 0.008804563 |
| 203285_s_at | -0.171139187 | -1.62590825 | 0.109338738 | 0.232893285 |
| 203286_at   | -0.16558525  | -3.5197756  | 0.000842956 | 0.004420081 |
| 203287_at   | 0.027751558  | 0.795653325 | 0.42944666  | 0.610458974 |
| 203288_at   | 0.428583055  | 5.241941712 | 2.28E-06    | 3.15E-05    |
| 203289_s_at | 0.01671461   | 0.329502619 | 0.742951386 | 0.851078087 |
| 203290_at   | 0.047088147  | 0.554189754 | 0.581559031 | 0.737627319 |
| 203291_at   | 0.088157099  | 1.586238786 | 0.118070195 | 0.246675913 |
| 203292_s_at | -0.03055196  | -0.94613103 | 0.347969114 | 0.53096506  |
| 203293_s_at | -0.02268744  | -0.55880157 | 0.578427605 | 0.735273702 |
| 203294_s_at | -0.06606049  | -1.92630279 | 0.058924237 | 0.144869734 |
| 203295_s_at | 0.466505358  | 4.387831639 | 4.84E-05    | 0.000400753 |
| 203296_s_at | 0.418388293  | 4.950240521 | 6.61E-06    | 7.60E-05    |
| 203297_s_at | 0.189555691  | 4.346426736 | 5.59E-05    | 0.000452618 |
| 203298_s_at | 0.216279992  | 5.061905312 | 4.41E-06    | 5.44E-05    |
| 203299_s_at | -0.08215329  | -2.38093688 | 0.020540368 | 0.062906196 |
| 203300_x_at | -0.13301852  | -2.01925406 | 0.0480454   | 0.12361802  |
| 203301_s_at | 0.07910918   | 1.720221019 | 0.090672667 | 0.202031251 |
| 203302_at   | -0.36749973  | -5.2616118  | 2.12E-06    | 2.97E-05    |
| 203303_at   | -0.419753    | -5.51815536 | 8.17E-07    | 1.36E-05    |
| 203304_at   | 0.26676553   | 2.923793975 | 0.004909761 | 0.019433801 |
| 203305_at   | 0.106335003  | 1.334396937 | 0.187238957 | 0.345232208 |
| 203306_s_at | -0.12267191  | -2.14046798 | 0.036492002 | 0.099498092 |
| 203307_at   | -0.03278964  | -0.81786586 | 0.416748858 | 0.599078159 |
| 203308_x_at | 0.035946702  | 1.400345163 | 0.166685702 | 0.317947819 |
| 203309_s_at | -0.08764115  | -2.77341333 | 0.007428992 | 0.027342215 |
| 203310_at   | 0.345833356  | 4.03284202  | 0.000161529 | 0.001100801 |
| 203311_s_at | -0.01753764  | -0.38650034 | 0.700526841 | 0.823048596 |
| 203312_x_at | 0.184947209  | 3.507155455 | 0.000876627 | 0.004566759 |
| 203313_s_at | 0.652710611  | 5.969604952 | 1.49E-07    | 3.42E-06    |
| 203314_at   | 0.146413673  | 3.048538392 | 0.003448482 | 0.014463173 |
| 203315_at   | 0.022000634  | 0.427795878 | 0.670368722 | 0.80156564  |
| 203316_s_at | -0.00917454  | -0.1089067  | 0.913648775 | 0.954234837 |
| 203317_at   | 0.135331234  | 3.735708569 | 0.00042641  | 0.002501262 |
| 203318_s_at | 0.200008771  | 2.77058413  | 0.007486161 | 0.027520896 |
| 203319_s_at | -0.10320649  | -1.59428573 | 0.116255039 | 0.243779392 |
| 203320_at   | -0.01076931  | -0.21951763 | 0.82701015  | 0.903994952 |
| 203321_s_at | 0.179213642  | 3.323639231 | 0.001536018 | 0.007306834 |
| 203322_at   | 0.097186938  | 1.749693792 | 0.085409254 | 0.19313986  |

|             |             |             |             |             |
|-------------|-------------|-------------|-------------|-------------|
| 203323_at   | 0.312283804 | 4.849956416 | 9.49E-06    | 0.000102208 |
| 203324_s_at | 0.208562801 | 3.062251093 | 0.003315386 | 0.013979735 |
| 203325_s_at | 0.101597283 | 2.067513021 | 0.043113485 | 0.113523118 |
| 203326_x_at | -0.02547518 | -0.52443603 | 0.601954695 | 0.753066824 |
| 203327_at   | 0.132605361 | 3.313028264 | 0.00158584  | 0.007507083 |
| 203328_x_at | 0.028519096 | 0.712293672 | 0.479111057 | 0.654548543 |
| 203329_at   | -0.36390967 | -6.92001018 | 3.82E-09    | 2.29E-07    |
| 203330_s_at | 0.014707639 | 0.483083534 | 0.630837466 | 0.774501072 |
| 203331_s_at | 0.065178291 | 1.755893122 | 0.084335013 | 0.191237527 |
| 203332_s_at | 0.153687885 | 2.717196734 | 0.008643667 | 0.030994455 |
| 203333_at   | -0.44264069 | -4.92299095 | 7.30E-06    | 8.25E-05    |
| 203334_at   | 0.042436387 | 1.081201115 | 0.284039704 | 0.461527085 |
| 203335_at   | 0.186273714 | 2.483313024 | 0.015900202 | 0.051049701 |
| 203336_s_at | -0.66735301 | -5.31897024 | 1.71E-06    | 2.50E-05    |
| 203337_x_at | -0.33330367 | -2.49732406 | 0.015344716 | 0.049568923 |
| 203338_at   | -0.04603752 | -0.78435051 | 0.435995512 | 0.616598508 |
| 203339_at   | -0.3067752  | -4.90266562 | 7.85E-06    | 8.73E-05    |
| 203340_s_at | -0.47949854 | -6.34602716 | 3.52E-08    | 1.13E-06    |
| 203341_at   | 0.202749794 | 3.203253323 | 0.002198956 | 0.009874973 |
| 203342_at   | -0.15100833 | -4.63613732 | 2.03E-05    | 0.000194019 |
| 203343_at   | 0.137316804 | 3.513719494 | 0.000858958 | 0.004488312 |
| 203344_s_at | 0.223371346 | 5.477581913 | 9.50E-07    | 1.54E-05    |
| 203345_s_at | -0.12042549 | -1.94402115 | 0.056701839 | 0.140745269 |
| 203346_s_at | 0.02877711  | 0.481777114 | 0.63175976  | 0.775271347 |
| 203347_s_at | -0.07680939 | -2.82441476 | 0.006464932 | 0.024367947 |
| 203348_s_at | -0.27381629 | -5.27066639 | 2.05E-06    | 2.89E-05    |
| 203349_s_at | -0.32919654 | -4.46278278 | 3.74E-05    | 0.000323217 |
| 203350_at   | 0.039966288 | 0.937946006 | 0.352124213 | 0.535422502 |
| 203351_s_at | 0.034222294 | 0.634357608 | 0.528317664 | 0.695977488 |
| 203352_at   | -0.07680302 | -2.69005003 | 0.009293184 | 0.032895823 |
| 203353_s_at | -0.01954557 | -0.71644037 | 0.476566744 | 0.652334485 |
| 203354_s_at | -0.65642456 | -4.16821614 | 0.000102596 | 0.000753651 |
| 203355_s_at | -0.75302521 | -5.75629455 | 3.34E-07    | 6.53E-06    |
| 203356_at   | 0.109156932 | 2.574128874 | 0.012599506 | 0.042119259 |
| 203357_s_at | -0.05180609 | -0.87884126 | 0.383078912 | 0.565763284 |
| 203358_s_at | -0.00785283 | -0.43040918 | 0.668477802 | 0.800203828 |
| 203359_s_at | 0.170326111 | 2.683610209 | 0.009453681 | 0.033349429 |
| 203360_s_at | 0.154605786 | 2.831365511 | 0.006342872 | 0.023990831 |
| 203361_s_at | 0.01894143  | 0.432573704 | 0.666913233 | 0.799498825 |
| 203362_s_at | -0.20462291 | -4.40720346 | 4.53E-05    | 0.000378711 |
| 203363_s_at | -0.04257505 | -1.05505649 | 0.295732557 | 0.474668627 |
| 203364_s_at | 0.09909076  | 2.864361442 | 0.005791938 | 0.02224488  |
| 203365_s_at | 0.056010642 | 1.491471211 | 0.141204849 | 0.281723189 |
| 203366_at   | 0.009103765 | 0.179675906 | 0.858027223 | 0.922521197 |
| 203367_at   | -0.38863271 | -6.16164266 | 7.13E-08    | 1.94E-06    |
| 203368_at   | -0.21337465 | -4.45131737 | 3.89E-05    | 0.000334676 |
| 203369_x_at | -0.11946953 | -2.84241369 | 0.00615323  | 0.023404267 |
| 203370_s_at | -0.00487315 | -0.1088274  | 0.913711404 | 0.954234837 |
| 203371_s_at | -0.17103108 | -2.38540596 | 0.020314885 | 0.062369502 |
| 203372_s_at | -0.0390322  | -1.07563861 | 0.286500194 | 0.464461211 |
| 203373_at   | 0.038900195 | 0.691000467 | 0.49229511  | 0.666191881 |
| 203374_s_at | -0.06590081 | -1.52632523 | 0.132311646 | 0.268646951 |
| 203375_s_at | 0.018501506 | 0.362717199 | 0.718121902 | 0.83497705  |
| 203376_at   | -0.47750391 | -7.97446186 | 6.34E-11    | 1.63E-08    |
| 203377_s_at | -0.20719155 | -5.01107594 | 5.30E-06    | 6.32E-05    |
| 203378_at   | 0.238457774 | 4.337271583 | 5.77E-05    | 0.000463914 |
| 203379_at   | 0.167180808 | 3.315576816 | 0.001573736 | 0.007457685 |
| 203380_x_at | 0.182633559 | 3.205059277 | 0.002187273 | 0.00983041  |
| 203381_s_at | 0.035600854 | 0.347185444 | 0.729696536 | 0.842375313 |
| 203382_s_at | 0.192827152 | 2.330578203 | 0.023240181 | 0.06955402  |
| 203383_s_at | 0.104215109 | 3.514077123 | 0.000858005 | 0.004484381 |
| 203384_s_at | 0.2436739   | 6.071683603 | 1.01E-07    | 2.53E-06    |
| 203385_at   | -0.19053978 | -4.51023453 | 3.17E-05    | 0.000280107 |
| 203386_at   | 0.070994917 | 1.298734637 | 0.199125371 | 0.360628472 |
| 203387_s_at | -0.12845365 | -2.23626628 | 0.029157486 | 0.083233671 |
| 203388_at   | -0.0418692  | -1.02561349 | 0.309291362 | 0.489894016 |
| 203389_at   | -0.62310107 | -7.11583761 | 1.79E-09    | 1.35E-07    |
| 203390_s_at | -0.53829767 | -6.91524632 | 3.89E-09    | 2.32E-07    |
| 203391_at   | -0.08558288 | -1.89259078 | 0.063357857 | 0.153471471 |
| 203392_s_at | -0.27287997 | -2.51571313 | 0.014642261 | 0.04761638  |
| 203393_at   | -0.00517267 | -0.14628395 | 0.884199593 | 0.938058401 |
| 203394_s_at | 0.195518958 | 2.718908795 | 0.008604133 | 0.030883936 |
| 203395_s_at | 0.255063045 | 2.683498997 | 0.009456475 | 0.033356652 |
| 203396_at   | -0.00676097 | -0.08472438 | 0.932769475 | 0.965100847 |
| 203397_s_at | 0.246679523 | 3.813111458 | 0.00033231  | 0.00202891  |

|             |             |             |             |             |
|-------------|-------------|-------------|-------------|-------------|
| 203398_s_at | 0.117005603 | 2.995889717 | 0.004007214 | 0.016418262 |
| 203399_x_at | -0.00376045 | -0.15266636 | 0.879186145 | 0.935181531 |
| 203400_s_at | 0.158848984 | 0.91655896  | 0.363132661 | 0.546269646 |
| 203401_at   | -0.31729654 | -5.08421273 | 4.06E-06    | 5.08E-05    |
| 203402_at   | -0.65152436 | -7.41765114 | 5.52E-10    | 6.20E-08    |
| 203403_s_at | -0.48337147 | -4.4501247  | 3.90E-05    | 0.000335748 |
| 203404_at   | -0.44407972 | -5.63406127 | 5.29E-07    | 9.50E-06    |
| 203405_at   | -0.05671067 | -0.99681014 | 0.322957442 | 0.504936645 |
| 203406_at   | 0.111832172 | 2.579871105 | 0.012413363 | 0.041600031 |
| 203407_at   | 0.157142793 | 2.350716581 | 0.022124725 | 0.066840904 |
| 203408_s_at | 0.268170313 | 3.788868306 | 0.000359401 | 0.002165029 |
| 203409_at   | 0.139904822 | 3.049720098 | 0.003436819 | 0.014418315 |
| 203410_at   | -0.15361974 | -3.45273859 | 0.001037013 | 0.005254072 |
| 203411_s_at | 0.234502761 | 3.724593979 | 0.000441859 | 0.002578264 |
| 203412_at   | 0.077642821 | 2.134981132 | 0.036957132 | 0.100458245 |
| 203413_at   | -0.70111223 | -6.14154625 | 7.70E-08    | 2.06E-06    |
| 203414_at   | -0.94884734 | -7.73977706 | 1.58E-10    | 2.81E-08    |
| 203415_at   | -0.13947582 | -1.87319664 | 0.066034329 | 0.158494845 |
| 203416_at   | 0.135064469 | 1.361190568 | 0.17866796  | 0.334269937 |
| 203417_at   | 0.008009824 | 0.255603807 | 0.799152358 | 0.886224093 |
| 203418_at   | 0.071548884 | 1.491433961 | 0.141214599 | 0.281723189 |
| 203419_at   | 0.067718843 | 1.659607539 | 0.102339447 | 0.221553698 |
| 203420_at   | -0.06242105 | -1.57867877 | 0.119796224 | 0.249175636 |
| 203421_at   | -0.00465166 | -0.08726732 | 0.930756724 | 0.963928709 |
| 203422_at   | 0.051029929 | 1.383963529 | 0.171621308 | 0.324614615 |
| 203423_at   | 0.124797813 | 1.479094838 | 0.144473847 | 0.286422621 |
| 203424_s_at | -0.01813937 | -0.45481596 | 0.650923097 | 0.788435105 |
| 203425_s_at | -0.01327931 | -0.35295208 | 0.725391554 | 0.83954938  |
| 203426_s_at | -0.00357403 | -0.07326108 | 0.941847999 | 0.969864076 |
| 203427_at   | -0.0417636  | -0.50575512 | 0.614926908 | 0.763058457 |
| 203428_s_at | -0.25266766 | -3.46238033 | 0.0010067   | 0.005122559 |
| 203429_s_at | 0.005322529 | 0.095211621 | 0.924471766 | 0.960494472 |
| 203430_at   | 0.282619357 | 3.39634005  | 0.001232412 | 0.006073324 |
| 203431_s_at | -0.57149643 | -7.89302391 | 8.70E-11    | 1.95E-08    |
| 203432_at   | 0.080827114 | 2.696673489 | 0.009130715 | 0.032432833 |
| 203433_at   | -0.00753963 | -0.14155933 | 0.887913913 | 0.939790375 |
| 203434_s_at | -0.70894285 | -7.65092437 | 2.23E-10    | 3.46E-08    |
| 203435_s_at | -0.70725997 | -8.80667971 | 2.55E-12    | 3.35E-09    |
| 203436_at   | 0.038651943 | 1.294126003 | 0.200701848 | 0.362716008 |
| 203437_at   | -0.00942825 | -0.39676842 | 0.692980371 | 0.817876589 |
| 203438_at   | -0.00417536 | -0.09655433 | 0.923409978 | 0.95990135  |
| 203439_s_at | -0.04097774 | -0.85218356 | 0.39758366  | 0.579940891 |
| 203440_at   | 0.349609086 | 5.146768518 | 3.23E-06    | 4.21E-05    |
| 203441_s_at | 0.052661094 | 1.187144598 | 0.239963476 | 0.40987761  |
| 203442_x_at | 0.356007459 | 6.743152493 | 7.58E-09    | 3.68E-07    |
| 203443_at   | 0.003665911 | 0.076973479 | 0.938907004 | 0.968129383 |
| 203444_s_at | 0.003768068 | 0.097120122 | 0.922962602 | 0.959704163 |
| 203445_s_at | 0.349295624 | 6.772507541 | 6.77E-09    | 3.40E-07    |
| 203446_s_at | -0.15208735 | -3.31023122 | 0.001599225 | 0.007559235 |
| 203447_at   | -0.00821954 | -0.15600642 | 0.876564458 | 0.933859803 |
| 203448_s_at | 0.226732135 | 4.149144735 | 0.000109416 | 0.000794479 |
| 203449_s_at | -0.08342866 | -1.39580777 | 0.168041682 | 0.31977106  |
| 203450_at   | 0.300866107 | 6.345607206 | 3.52E-08    | 1.13E-06    |
| 203451_at   | -0.10650084 | -1.56178949 | 0.12372546  | 0.255464924 |
| 203452_at   | -0.04225498 | -1.08392032 | 0.282842257 | 0.460183704 |
| 203453_at   | 0.004219623 | 0.079267498 | 0.937090086 | 0.96732401  |
| 203454_s_at | 0.111025402 | 2.132688656 | 0.037152998 | 0.100859004 |
| 203455_s_at | 0.258362387 | 2.664379101 | 0.00994818  | 0.03475098  |
| 203456_at   | 0.015346743 | 0.397097745 | 0.692738844 | 0.817660164 |
| 203457_at   | -0.04777047 | -1.2492837  | 0.216531314 | 0.382634829 |
| 203458_at   | 0.190347315 | 3.411029757 | 0.001178402 | 0.005845188 |
| 203459_s_at | 0.100388345 | 2.223016525 | 0.030087496 | 0.085327137 |
| 203460_s_at | 0.185277705 | 1.754399038 | 0.084592882 | 0.191676389 |
| 203461_at   | 0.006573711 | 0.239913932 | 0.811234712 | 0.89416484  |
| 203462_x_at | 0.126186291 | 3.230241986 | 0.002030325 | 0.009220534 |
| 203463_s_at | -0.04490137 | -0.87275683 | 0.386359897 | 0.568991877 |
| 203464_s_at | 0.148116563 | 2.545558208 | 0.013563883 | 0.044724589 |
| 203465_at   | 0.014229922 | 0.262203586 | 0.794084559 | 0.882847862 |
| 203466_at   | -0.07324201 | -2.21345453 | 0.030774809 | 0.086851968 |
| 203467_at   | -0.0849585  | -1.36442929 | 0.177652537 | 0.332899254 |
| 203468_at   | 0.052582912 | 0.878677324 | 0.383167082 | 0.565856102 |
| 203469_s_at | 0.011460707 | 0.281880003 | 0.779029194 | 0.873554113 |
| 203470_s_at | -0.10684637 | -2.06663252 | 0.043199384 | 0.113735897 |
| 203471_s_at | -0.23166627 | -3.6433202  | 0.00057225  | 0.003211326 |
| 203472_s_at | -0.02697912 | -0.34759306 | 0.729391949 | 0.842129349 |



|             |             |             |             |             |
|-------------|-------------|-------------|-------------|-------------|
| 203473_at   | 0.215599924 | 2.841896008 | 0.006161997 | 0.023435622 |
| 203474_at   | 0.161837218 | 2.122992433 | 0.037991488 | 0.102648908 |
| 203475_at   | 0.035663194 | 1.085364627 | 0.282207665 | 0.459502512 |
| 203476_at   | -1.22840235 | -9.41662727 | 2.50E-13    | 1.54E-09    |
| 203477_at   | 0.008941001 | 0.278766459 | 0.781406021 | 0.875110485 |
| 203478_at   | -0.14794195 | -2.55373271 | 0.013281345 | 0.043974653 |
| 203479_s_at | 0.036503482 | 0.681255314 | 0.498394937 | 0.671396989 |
| 203480_s_at | -0.06036671 | -1.23265881 | 0.222628424 | 0.389695657 |
| 203481_at   | 0.020643583 | 0.503829254 | 0.616271395 | 0.764005581 |
| 203482_at   | 0.238473169 | 3.915751063 | 0.000237827 | 0.001528685 |
| 203483_at   | -0.07497028 | -1.44258837 | 0.154463498 | 0.300491657 |
| 203484_at   | -0.04568218 | -0.45913732 | 0.647835165 | 0.786340282 |
| 203485_at   | -0.39548177 | -4.3647176  | 5.25E-05    | 0.000429499 |
| 203486_s_at | 0.05292065  | 1.441226747 | 0.154846257 | 0.301069735 |
| 203487_s_at | -0.09153396 | -2.11592429 | 0.038613071 | 0.103926248 |
| 203488_at   | -0.3218389  | -5.32019065 | 1.71E-06    | 2.49E-05    |
| 203489_at   | 0.126407947 | 2.774158046 | 0.007414011 | 0.027298316 |
| 203490_at   | 0.056803077 | 1.418119556 | 0.161455055 | 0.310301424 |
| 203491_s_at | -0.02821335 | -0.95439073 | 0.343808654 | 0.52663044  |
| 203492_x_at | -0.11577224 | -2.51637407 | 0.014617563 | 0.047546443 |
| 203493_s_at | -0.05579727 | -1.16767264 | 0.247670681 | 0.419657949 |
| 203494_s_at | 0.014318261 | 0.405156829 | 0.686838417 | 0.813057756 |
| 203495_at   | 0.076847078 | 2.484552876 | 0.015850325 | 0.050912904 |
| 203496_s_at | 0.041620793 | 0.95977571  | 0.341113825 | 0.524047268 |
| 203497_at   | 0.189936823 | 3.747696287 | 0.000410327 | 0.002425066 |
| 203498_at   | -0.93208589 | -6.60457225 | 1.30E-08    | 5.46E-07    |
| 203499_at   | 0.079907737 | 2.098719508 | 0.040163255 | 0.107201157 |
| 203500_at   | 0.134783449 | 2.831674503 | 0.006337496 | 0.023976583 |
| 203501_at   | 0.298918088 | 5.521279468 | 8.07E-07    | 1.35E-05    |
| 203502_at   | -0.02879479 | -0.71548897 | 0.477149832 | 0.652812719 |
| 203503_s_at | -0.18069691 | -3.72634087 | 0.000439396 | 0.00256632  |
| 203504_s_at | 0.383888546 | 3.085143506 | 0.00310383  | 0.013222415 |
| 203505_at   | 0.559439886 | 5.300651976 | 1.83E-06    | 2.64E-05    |
| 203506_s_at | 0.211684461 | 4.984046962 | 5.85E-06    | 6.84E-05    |
| 203507_at   | 0.121845359 | 3.67219847  | 0.00052219  | 0.002972581 |
| 203508_at   | 0.224877212 | 4.164082388 | 0.000104038 | 0.000762117 |
| 203509_at   | 0.459698668 | 5.985083751 | 1.40E-07    | 3.29E-06    |
| 203510_at   | 0.133309746 | 2.27381133  | 0.026658589 | 0.077511266 |
| 203511_s_at | -0.20882938 | -3.42441299 | 0.001131155 | 0.00564151  |
| 203512_at   | -0.02778765 | -0.73533099 | 0.465072531 | 0.642921883 |
| 203513_at   | 0.17310921  | 2.581388115 | 0.012364606 | 0.041458395 |
| 203514_at   | 0.083626103 | 1.834760596 | 0.071621576 | 0.168602131 |
| 203515_s_at | 0.167037623 | 3.485873097 | 0.000936324 | 0.004824325 |
| 203516_at   | 0.211227531 | 3.00693057  | 0.003883484 | 0.016006701 |
| 203517_at   | -0.28212978 | -4.33744377 | 5.76E-05    | 0.000463849 |
| 203518_at   | -0.05971028 | -0.97755035 | 0.332317537 | 0.51485199  |
| 203519_s_at | -0.0004051  | -0.00759233 | 0.993968057 | 0.997225798 |
| 203520_s_at | 0.008686249 | 0.218173715 | 0.82805219  | 0.904492447 |
| 203521_s_at | 0.10100832  | 2.479851692 | 0.016040196 | 0.051415418 |
| 203522_at   | 0.165207741 | 4.617343147 | 2.17E-05    | 0.000204923 |
| 203523_at   | -0.0026324  | -0.0622295  | 0.950591959 | 0.974686323 |
| 203524_s_at | 0.211763371 | 5.140728752 | 3.30E-06    | 4.28E-05    |
| 203525_s_at | 0.228621761 | 2.232675129 | 0.029407011 | 0.083764044 |
| 203526_s_at | 0.072207375 | 0.827475774 | 0.411326472 | 0.593555348 |
| 203527_s_at | -0.15893052 | -2.7739001  | 0.007419197 | 0.02731291  |
| 203528_at   | 0.295531402 | 3.455865343 | 0.001027089 | 0.005213248 |
| 203529_at   | 0.138381946 | 3.060647563 | 0.003330698 | 0.014032374 |
| 203530_s_at | 0.107657366 | 1.627732728 | 0.108950102 | 0.232253659 |
| 203531_at   | 0.022578274 | 0.312708489 | 0.755612943 | 0.859580491 |
| 203532_x_at | -0.04395303 | -1.26525765 | 0.210789915 | 0.375539256 |
| 203533_s_at | 0.084619537 | 2.250423318 | 0.02819192  | 0.081005098 |
| 203534_at   | 0.110025636 | 2.685925706 | 0.009395683 | 0.033195091 |
| 203535_at   | 0.129727364 | 1.791034625 | 0.078455584 | 0.180836156 |
| 203536_s_at | -0.15770263 | -4.05691437 | 0.00014908  | 0.001028668 |
| 203537_at   | 0.085202932 | 1.595563964 | 0.115968788 | 0.243353598 |
| 203538_at   | -0.1253844  | -2.0664302  | 0.043219142 | 0.113771594 |
| 203539_s_at | 0.079275367 | 2.255231365 | 0.027870481 | 0.080246589 |
| 203540_at   | 0.690061987 | 7.806908709 | 1.22E-10    | 2.35E-08    |
| 203541_s_at | 0.062334452 | 1.355383987 | 0.180499552 | 0.336751658 |
| 203542_s_at | 0.124119927 | 1.529366172 | 0.131557319 | 0.267508063 |
| 203543_s_at | 0.03449326  | 0.294145696 | 0.769686576 | 0.868153155 |
| 203544_s_at | -0.07267762 | -0.73954848 | 0.462528107 | 0.640557999 |
| 203545_at   | -0.1283403  | -2.82232229 | 0.0065021   | 0.024485325 |
| 203546_at   | -0.00797563 | -0.1613686  | 0.872358486 | 0.931176896 |
| 203547_at   | 0.06467185  | 1.696724837 | 0.095058003 | 0.20944253  |

|             |             |             |             |             |
|-------------|-------------|-------------|-------------|-------------|
| 203548_s_at | -1.52133641 | -8.33683574 | 1.56E-11    | 6.97E-09    |
| 203549_s_at | -1.54001038 | -8.11471246 | 3.68E-11    | 1.22E-08    |
| 203550_s_at | -0.1221491  | -3.48302633 | 0.000944596 | 0.004861902 |
| 203551_s_at | -0.21699149 | -4.4462119  | 3.96E-05    | 0.000339234 |
| 203552_at   | 0.455574988 | 5.058019377 | 4.47E-06    | 5.51E-05    |
| 203553_s_at | 0.395502903 | 3.136011407 | 0.002678106 | 0.011674786 |
| 203554_x_at | 0.040223659 | 0.83212165  | 0.408720513 | 0.590901471 |
| 203555_at   | -0.00841402 | -0.19299806 | 0.847628228 | 0.916268401 |
| 203556_at   | 0.489059845 | 6.799896237 | 6.09E-09    | 3.16E-07    |
| 203557_s_at | 0.097757748 | 2.698644564 | 0.00908287  | 0.032280845 |
| 203558_at   | -0.0464008  | -0.98459847 | 0.328871555 | 0.511338977 |
| 203559_s_at | -0.00379978 | -0.14468817 | 0.885453847 | 0.938609221 |
| 203560_at   | -0.23582603 | -4.45383692 | 3.85E-05    | 0.000332274 |
| 203561_at   | 0.096508402 | 1.625429117 | 0.109440987 | 0.233055538 |
| 203562_at   | 0.105483441 | 1.543040468 | 0.12820749  | 0.262427825 |
| 203563_at   | -0.05675239 | -3.01452769 | 0.003800424 | 0.015707808 |
| 203564_at   | 0.138363918 | 3.454862808 | 0.001030261 | 0.005225788 |
| 203565_s_at | -0.08880586 | -2.49898528 | 0.01528003  | 0.049395667 |
| 203566_s_at | 0.004196272 | 0.051259197 | 0.959293412 | 0.979133132 |
| 203567_s_at | 0.147572376 | 3.559084768 | 0.000745785 | 0.004003199 |
| 203568_s_at | 0.111131264 | 3.89297755  | 0.000256247 | 0.001627427 |
| 203569_s_at | 0.469972086 | 5.800055586 | 2.83E-07    | 5.69E-06    |
| 203570_at   | 0.236650694 | 4.557094512 | 2.69E-05    | 0.000244839 |
| 203571_s_at | 0.63135383  | 5.432160649 | 1.13E-06    | 1.76E-05    |
| 203572_s_at | -0.1087862  | -2.69865481 | 0.009082622 | 0.032280845 |
| 203573_s_at | -0.10274117 | -2.51551745 | 0.01464958  | 0.047636717 |
| 203574_at   | 0.018977457 | 0.121269634 | 0.903892591 | 0.948994801 |
| 203575_at   | -0.0448407  | -1.1463836  | 0.256298727 | 0.429844743 |
| 203576_at   | 0.079438557 | 1.768811341 | 0.082132518 | 0.187278903 |
| 203577_at   | -0.14839713 | -3.34913357 | 0.001422288 | 0.006856825 |
| 203578_s_at | 0.008076265 | 0.318822474 | 0.750995434 | 0.856799991 |
| 203579_s_at | -0.0160359  | -0.58627605 | 0.559942913 | 0.721492627 |
| 203580_s_at | -0.03532107 | -0.88241482 | 0.38116008  | 0.563991732 |
| 203581_at   | 0.275084596 | 3.23455515  | 0.00200453  | 0.009126575 |
| 203582_s_at | 0.108881197 | 1.127391719 | 0.264174671 | 0.439024423 |
| 203583_at   | 0.017582969 | 0.248417018 | 0.804680784 | 0.889991923 |
| 203584_at   | 0.176244426 | 1.798777329 | 0.077207234 | 0.178581187 |
| 203585_at   | 0.000110458 | 0.0032335   | 0.997431034 | 0.998747055 |
| 203586_s_at | -0.20756675 | -4.51853124 | 3.08E-05    | 0.000273779 |
| 203587_at   | -0.04575843 | -1.38649387 | 0.170851699 | 0.323642781 |
| 203588_s_at | 0.010208625 | 0.279729746 | 0.78067044  | 0.874692221 |
| 203589_s_at | -0.00823389 | -0.24174757 | 0.809820234 | 0.893260674 |
| 203590_at   | 0.385089444 | 5.747492761 | 3.45E-07    | 6.71E-06    |
| 203591_s_at | 0.072753479 | 1.741643607 | 0.086821125 | 0.195594803 |
| 203592_s_at | 0.175595366 | 3.791239326 | 0.000356661 | 0.002150841 |
| 203593_at   | 0.180629203 | 3.496735088 | 0.000905389 | 0.004691985 |
| 203594_at   | -0.30799794 | -3.66787853 | 0.000529403 | 0.003006746 |
| 203595_s_at | 0.157768703 | 2.774757486 | 0.007401972 | 0.027260643 |
| 203596_s_at | 0.097415963 | 1.844751412 | 0.070132331 | 0.165930025 |
| 203597_s_at | 0.121428714 | 1.819247909 | 0.073986537 | 0.172849257 |
| 203598_s_at | 0.003929062 | 0.109360734 | 0.913290232 | 0.953997126 |
| 203599_s_at | -0.10394216 | -2.33531929 | 0.022973159 | 0.068897895 |
| 203600_s_at | 0.164618092 | 3.607357081 | 0.000641015 | 0.003529411 |
| 203601_s_at | -0.07887334 | -2.0975254  | 0.040272828 | 0.107440626 |
| 203602_s_at | 0.108575548 | 2.569382858 | 0.012755264 | 0.042532139 |
| 203603_s_at | 0.755446344 | 5.708474386 | 4.00E-07    | 7.56E-06    |
| 203604_at   | 0.008552271 | 0.222111033 | 0.825000167 | 0.902813601 |
| 203605_at   | -0.06258059 | -0.65083991 | 0.517695257 | 0.687328038 |
| 203606_at   | -0.01454601 | -0.21667139 | 0.829217429 | 0.905234259 |
| 203607_at   | -0.79178349 | -6.30936566 | 4.05E-08    | 1.26E-06    |
| 203608_at   | -0.14999781 | -1.74279991 | 0.086617147 | 0.19522384  |
| 203609_s_at | 0.02070398  | 0.601451297 | 0.549860533 | 0.71287906  |
| 203610_s_at | -0.01559119 | -0.40550013 | 0.686587505 | 0.812846855 |
| 203611_at   | -0.22709314 | -4.4511962  | 3.89E-05    | 0.000334693 |
| 203612_at   | -0.00028449 | -0.00811284 | 0.993554534 | 0.997070502 |
| 203613_s_at | -0.30589703 | -4.55121642 | 2.74E-05    | 0.000248953 |
| 203614_at   | 0.051698846 | 0.864502276 | 0.390839146 | 0.573660322 |
| 203615_x_at | -0.01220339 | -0.31745019 | 0.752031043 | 0.857304647 |
| 203616_at   | -0.1752418  | -3.67171562 | 0.000522992 | 0.002976006 |
| 203617_x_at | -0.20642527 | -3.3394006  | 0.001464734 | 0.007026069 |
| 203618_at   | -0.35186587 | -4.85016548 | 9.49E-06    | 0.000102164 |
| 203619_s_at | -0.34233676 | -4.44458994 | 3.98E-05    | 0.000340817 |
| 203620_s_at | 0.50074221  | 7.89504756  | 8.63E-11    | 1.95E-08    |
| 203621_at   | -0.38527055 | -5.82216607 | 2.60E-07    | 5.33E-06    |
| 203622_s_at | -0.33748744 | -5.29408411 | 1.88E-06    | 2.69E-05    |

|             |             |             |             |             |
|-------------|-------------|-------------|-------------|-------------|
| 203623_at   | 0.112303477 | 2.398000471 | 0.019691312 | 0.060814328 |
| 203624_at   | 0.089105164 | 1.987861351 | 0.051508478 | 0.130529423 |
| 203625_x_at | 0.320423397 | 6.157036111 | 7.26E-08    | 1.96E-06    |
| 203626_s_at | 0.014688848 | 0.371862447 | 0.711337353 | 0.830401447 |
| 203627_at   | 0.231258115 | 2.84984159  | 0.006028688 | 0.022991221 |
| 203628_at   | 0.398709933 | 4.346981725 | 5.58E-05    | 0.000451918 |
| 203629_s_at | 0.014742404 | 0.367213735 | 0.714783185 | 0.83271757  |
| 203630_s_at | -0.12011136 | -2.02161655 | 0.047793096 | 0.12311087  |
| 203631_s_at | -0.09449768 | -1.06176503 | 0.292701171 | 0.471198067 |
| 203632_s_at | 0.351499241 | 4.511936905 | 3.15E-05    | 0.000278776 |
| 203633_at   | 0.227045645 | 3.570193841 | 0.000720319 | 0.003887044 |
| 203634_s_at | -0.0048672  | -0.15381445 | 0.878284831 | 0.934828889 |
| 203635_at   | -0.07247545 | -2.07033112 | 0.042839556 | 0.112901606 |
| 203636_at   | 0.186048906 | 2.84284786  | 0.006145885 | 0.023382302 |
| 203637_s_at | 0.342703862 | 3.561013827 | 0.000741303 | 0.003982485 |
| 203638_s_at | 0.308345923 | 3.951804219 | 0.000211243 | 0.001379435 |
| 203639_s_at | -0.02590492 | -0.32032166 | 0.749864579 | 0.855860964 |
| 203640_at   | -0.19836916 | -3.51027434 | 0.000868189 | 0.004529551 |
| 203641_s_at | 0.069988919 | 1.205697548 | 0.232782776 | 0.401377193 |
| 203642_s_at | 0.282512779 | 4.850476518 | 9.48E-06    | 0.000102131 |
| 203643_at   | 0.010982359 | 0.307483951 | 0.759565825 | 0.861513662 |
| 203644_s_at | 0.159379804 | 3.788871052 | 0.000359398 | 0.002165029 |
| 203645_s_at | 0.61890515  | 2.853587551 | 0.005966768 | 0.022801777 |
| 203646_at   | -0.05505619 | -1.1908864  | 0.23850251  | 0.408162135 |
| 203647_s_at | -0.06534381 | -0.96786694 | 0.33709085  | 0.519837575 |
| 203648_at   | -0.14830201 | -3.90388996 | 0.000247256 | 0.001579524 |
| 203649_s_at | 0.052459483 | 1.520149833 | 0.133854067 | 0.270934885 |
| 203650_at   | 0.047142598 | 2.086688083 | 0.041279225 | 0.109590775 |
| 203651_at   | 0.224215991 | 1.747107406 | 0.085860773 | 0.193929837 |
| 203652_at   | 0.215240301 | 4.899594866 | 7.94E-06    | 8.82E-05    |
| 203653_s_at | 0.076405447 | 1.965190986 | 0.054140706 | 0.135790809 |
| 203654_s_at | 0.045966563 | 0.860258421 | 0.393154573 | 0.575923963 |
| 203655_at   | 0.016327111 | 0.286902823 | 0.775199329 | 0.871226888 |
| 203656_at   | -0.44904359 | -7.43565539 | 5.15E-10    | 5.89E-08    |
| 203657_s_at | 0.165008505 | 4.81724968  | 1.07E-05    | 0.000112577 |
| 203658_at   | 0.174692544 | 4.145402848 | 0.000110805 | 0.000803127 |
| 203659_s_at | 0.038015277 | 0.699058113 | 0.48728273  | 0.661692992 |
| 203660_s_at | -0.41832015 | -6.98858333 | 2.93E-09    | 1.87E-07    |
| 203661_s_at | -0.5773696  | -6.40527791 | 2.80E-08    | 9.42E-07    |
| 203662_s_at | -0.39114692 | -5.96046831 | 1.54E-07    | 3.52E-06    |
| 203663_s_at | -0.31865493 | -3.37596887 | 0.001311203 | 0.006400204 |
| 203664_s_at | 0.040073308 | 1.199775284 | 0.235057732 | 0.404015082 |
| 203665_at   | 0.230478373 | 3.279081523 | 0.001755676 | 0.008175108 |
| 203666_at   | 0.067972927 | 0.920327251 | 0.361177151 | 0.544280582 |
| 203667_at   | -0.03263783 | -0.52905422 | 0.598767389 | 0.750743584 |
| 203668_at   | 0.081140875 | 1.539245086 | 0.129130364 | 0.263797331 |
| 203669_s_at | -0.03413968 | -0.76464819 | 0.447551184 | 0.627158233 |
| 203670_at   | 0.001747562 | 0.024365748 | 0.9806437   | 0.990288496 |
| 203671_at   | -0.12274013 | -3.53851272 | 0.000795225 | 0.004209427 |
| 203672_x_at | -0.29662177 | -5.47668547 | 9.53E-07    | 1.54E-05    |
| 203673_at   | -0.0424339  | -0.75170713 | 0.455237513 | 0.634230336 |
| 203674_at   | 0.064578761 | 1.761656159 | 0.083346458 | 0.189380237 |
| 203675_at   | -0.19068655 | -2.35975035 | 0.021640053 | 0.065644284 |
| 203676_at   | 0.034433136 | 0.800763325 | 0.426505273 | 0.607766275 |
| 203677_s_at | 0.029131119 | 0.869817059 | 0.387951437 | 0.570621216 |
| 203678_at   | 0.164263976 | 3.867259219 | 0.0002787   | 0.001748746 |
| 203679_at   | 0.133224151 | 3.470045556 | 0.000983203 | 0.005025312 |
| 203680_at   | -0.97900139 | -7.45693537 | 4.74E-10    | 5.66E-08    |
| 203681_at   | -0.02704699 | -0.85322107 | 0.39701286  | 0.579391939 |
| 203682_s_at | -0.03598128 | -0.79557086 | 0.429494225 | 0.610467608 |
| 203683_s_at | 0.149145985 | 2.699711628 | 0.009057065 | 0.032216295 |
| 203684_s_at | -0.03315909 | -0.99623075 | 0.32323642  | 0.505213753 |
| 203685_at   | 0.655631855 | 6.765928762 | 6.94E-09    | 3.46E-07    |
| 203686_at   | -0.13394738 | -3.1231878  | 0.002779946 | 0.012049398 |
| 203687_at   | -0.48592855 | -6.59517981 | 1.34E-08    | 5.58E-07    |
| 203688_at   | 0.291822564 | 4.082803912 | 0.000136726 | 0.000959499 |
| 203689_s_at | 0.021605559 | 0.493129181 | 0.623765317 | 0.769071937 |
| 203690_at   | 0.071940412 | 1.128977768 | 0.263510455 | 0.43830471  |
| 203691_at   | -0.01436826 | -0.31213741 | 0.756044704 | 0.85969788  |
| 203692_s_at | -0.13086102 | -3.40455722 | 0.001201918 | 0.005944677 |
| 203693_s_at | -0.11389909 | -2.00915364 | 0.049137067 | 0.125767929 |
| 203694_s_at | -0.00245638 | -0.06130696 | 0.951323487 | 0.975105834 |
| 203695_s_at | 0.157561029 | 2.530580225 | 0.014095742 | 0.046133522 |
| 203696_s_at | -0.07169732 | -2.18602366 | 0.032823831 | 0.091524996 |
| 203697_at   | 0.035149472 | 0.362284631 | 0.71844338  | 0.835241466 |

|             |             |             |             |             |
|-------------|-------------|-------------|-------------|-------------|
| 203698_s_at | -0.00914985 | -0.16431684 | 0.870047514 | 0.929869122 |
| 203699_s_at | -0.06826944 | -1.59846871 | 0.115320403 | 0.242331175 |
| 203700_s_at | -0.12089273 | -2.10010665 | 0.040036294 | 0.106919751 |
| 203701_s_at | 0.08986899  | 2.33204566  | 0.023157239 | 0.069356877 |
| 203702_s_at | 0.154184941 | 4.131529553 | 0.000116104 | 0.000836245 |
| 203703_s_at | 0.077880882 | 1.89700473  | 0.062761725 | 0.152409733 |
| 203704_s_at | 0.55170517  | 6.946631741 | 3.45E-09    | 2.13E-07    |
| 203705_s_at | 0.059827959 | 1.04096436  | 0.302170384 | 0.481825275 |
| 203706_s_at | 0.242606236 | 2.486883374 | 0.015756955 | 0.050644436 |
| 203707_at   | 0.050974692 | 1.171231179 | 0.246249055 | 0.417755951 |
| 203708_at   | -0.15531297 | -1.76889384 | 0.082118607 | 0.187267771 |
| 203709_at   | 0.060965823 | 2.046630316 | 0.045191067 | 0.117868641 |
| 203710_at   | -0.94156923 | -6.82668216 | 5.49E-09    | 2.95E-07    |
| 203711_s_at | 0.131844952 | 2.78199139  | 0.007258102 | 0.026832583 |
| 203712_at   | 0.151103535 | 4.853924514 | 9.36E-06    | 0.00010115  |
| 203713_s_at | 0.139773533 | 3.676002825 | 0.000515916 | 0.002940611 |
| 203714_s_at | 0.012476255 | 0.346490617 | 0.73021584  | 0.84270245  |
| 203715_at   | -0.01231694 | -0.48485353 | 0.629588841 | 0.773694914 |
| 203716_s_at | 0.00969595  | 0.145159683 | 0.885083218 | 0.938461191 |
| 203717_at   | 0.046460415 | 1.688208938 | 0.096689839 | 0.212148966 |
| 203718_at   | 0.10342743  | 1.939186099 | 0.057301082 | 0.141901698 |
| 203719_at   | 0.020088446 | 0.617287401 | 0.539437828 | 0.705200888 |
| 203720_s_at | -0.09330929 | -2.86244251 | 0.005822726 | 0.022339193 |
| 203721_s_at | -0.23558978 | -2.88223878 | 0.005512257 | 0.021345967 |
| 203722_at   | 0.470803672 | 4.731038874 | 1.45E-05    | 0.000145688 |
| 203723_at   | 1.012990311 | 8.799670433 | 2.62E-12    | 3.35E-09    |
| 203724_s_at | -0.41559194 | -3.99105265 | 0.00018556  | 0.001237213 |
| 203725_at   | -0.21784805 | -1.26099871 | 0.212309517 | 0.377382847 |
| 203726_s_at | 0.187424545 | 2.68865792  | 0.009327666 | 0.032988577 |
| 203727_at   | 0.04710722  | 1.388741528 | 0.170170294 | 0.322666558 |
| 203728_at   | 0.003747165 | 0.120338383 | 0.904626987 | 0.949437489 |
| 203729_at   | 0.588015255 | 5.869170996 | 2.18E-07    | 4.61E-06    |
| 203730_s_at | -0.03016592 | -0.85042333 | 0.39855323  | 0.580900139 |
| 203731_s_at | 0.043177815 | 1.478254957 | 0.144697824 | 0.286726752 |
| 203732_at   | 0.134065371 | 2.796197787 | 0.006983025 | 0.025994115 |
| 203733_at   | -0.13837429 | -2.81114287 | 0.006704035 | 0.025110352 |
| 203734_at   | 0.058923878 | 2.101418111 | 0.039916581 | 0.106697758 |
| 203735_x_at | -0.0007138  | -0.01706464 | 0.986443046 | 0.993419155 |
| 203736_s_at | 0.005619078 | 0.219199178 | 0.827257041 | 0.904176368 |
| 203737_s_at | 0.010706643 | 0.343259828 | 0.732632153 | 0.844028391 |
| 203738_at   | -0.39958237 | -4.61935873 | 2.16E-05    | 0.000203729 |
| 203739_at   | 0.236862591 | 5.397239926 | 1.28E-06    | 1.95E-05    |
| 203740_at   | -0.1475751  | -3.90725895 | 0.000244542 | 0.001564646 |
| 203741_s_at | 0.218787526 | 3.177785961 | 0.002370079 | 0.010509334 |
| 203742_s_at | 0.21929727  | 5.977326789 | 1.44E-07    | 3.35E-06    |
| 203743_s_at | -0.0363322  | -0.60481868 | 0.547635758 | 0.711108644 |
| 203744_at   | 0.054475687 | 1.400656386 | 0.166593005 | 0.317811694 |
| 203745_at   | -0.23554049 | -4.14916734 | 0.000109408 | 0.000794479 |
| 203746_s_at | -0.08101966 | -2.54623034 | 0.013540448 | 0.044670386 |
| 203747_at   | -0.08810327 | -1.56380758 | 0.123250596 | 0.254708019 |
| 203748_x_at | -0.29706657 | -5.9222161  | 1.78E-07    | 3.94E-06    |
| 203749_s_at | 0.068197563 | 1.249307372 | 0.216522722 | 0.382634829 |
| 203750_s_at | 0.029951198 | 0.533242252 | 0.595883763 | 0.748657291 |
| 203751_x_at | -0.10493809 | -1.73980319 | 0.087146604 | 0.196169841 |
| 203752_s_at | 0.051243315 | 1.288642779 | 0.202589643 | 0.365176572 |
| 203753_at   | 0.612241632 | 7.394504447 | 6.04E-10    | 6.58E-08    |
| 203754_s_at | 0.0314906   | 0.910354788 | 0.366367021 | 0.549557026 |
| 203755_at   | -0.09218926 | -3.42647101 | 0.001124051 | 0.005614223 |
| 203756_at   | -0.25239019 | -6.33931704 | 3.61E-08    | 1.15E-06    |
| 203757_s_at | 0.003204372 | 0.08197503  | 0.934946088 | 0.966170385 |
| 203758_at   | 0.097371122 | 1.285244353 | 0.203766316 | 0.366703882 |
| 203759_at   | -0.00829613 | -0.1364994  | 0.891894636 | 0.942120445 |
| 203760_s_at | 0.235505116 | 3.538960806 | 0.000794116 | 0.004205833 |
| 203761_at   | 0.090564184 | 1.308305674 | 0.195881092 | 0.356504225 |
| 203762_s_at | -0.17297304 | -3.18245386 | 0.002337806 | 0.01038994  |
| 203763_at   | -0.03528063 | -0.65558917 | 0.514655648 | 0.68510381  |
| 203764_at   | -0.01307474 | -0.462282   | 0.64559195  | 0.785008836 |
| 203765_at   | 0.214903243 | 2.062542449 | 0.043600343 | 0.114555351 |
| 203766_s_at | 0.431469265 | 4.790402129 | 1.18E-05    | 0.000121866 |
| 203767_s_at | -0.45459712 | -6.09442405 | 9.23E-08    | 2.37E-06    |
| 203768_s_at | -0.10094911 | -2.12820662 | 0.037538556 | 0.101701816 |
| 203769_s_at | -0.33004412 | -5.92637911 | 1.75E-07    | 3.89E-06    |
| 203770_s_at | -0.11200869 | -1.87727382 | 0.065463862 | 0.15751647  |
| 203771_s_at | 0.04765866  | 1.642045401 | 0.105940061 | 0.227400379 |
| 203772_at   | 0.010162773 | 0.327049125 | 0.744796796 | 0.852130241 |

|             |             |             |             |             |
|-------------|-------------|-------------|-------------|-------------|
| 203773_x_at | 0.110102564 | 2.688653784 | 0.009327769 | 0.032988577 |
| 203774_at   | 0.128530471 | 1.924109805 | 0.059204393 | 0.145438506 |
| 203775_at   | 0.211068578 | 3.095113903 | 0.003015695 | 0.012903535 |
| 203776_at   | 0.202122598 | 3.281892293 | 0.001740987 | 0.008120247 |
| 203777_s_at | -0.03632007 | -0.74915849 | 0.456760213 | 0.635638407 |
| 203778_at   | 0.091305983 | 2.846839412 | 0.006078742 | 0.02315642  |
| 203779_s_at | -0.05023979 | -1.27486034 | 0.207393288 | 0.371151151 |
| 203780_at   | 0.080751673 | 3.113344249 | 0.002860569 | 0.012336634 |
| 203781_at   | -0.17614093 | -4.2287354  | 8.36E-05    | 0.000633144 |
| 203782_s_at | -0.10099391 | -1.77877872 | 0.080466011 | 0.184567031 |
| 203783_x_at | -0.04789269 | -1.25064673 | 0.216036948 | 0.38203313  |
| 203784_s_at | -0.08126186 | -2.18566637 | 0.032851292 | 0.091590139 |
| 203785_s_at | -0.13754431 | -2.85862027 | 0.005884503 | 0.022523997 |
| 203786_s_at | -0.26892242 | -3.12724821 | 0.002747314 | 0.011926464 |
| 203787_at   | 0.072524827 | 1.340013449 | 0.185416961 | 0.343047476 |
| 203788_s_at | 0.024304088 | 0.638120088 | 0.52588285  | 0.694218176 |
| 203789_s_at | -0.00115451 | -0.01250185 | 0.99006772  | 0.995332094 |
| 203790_s_at | 0.10545463  | 0.972430203 | 0.334835841 | 0.517623086 |
| 203791_at   | -0.00674682 | -0.06875417 | 0.945419503 | 0.971908497 |
| 203792_x_at | -0.08426363 | -1.4549393  | 0.151025177 | 0.295762871 |
| 203793_x_at | 0.102606399 | 2.237299214 | 0.029086061 | 0.083088586 |
| 203794_at   | 0.043881871 | 1.113396973 | 0.27008683  | 0.445811252 |
| 203795_s_at | -0.31231994 | -5.83864954 | 2.44E-07    | 5.05E-06    |
| 203796_s_at | -0.15269544 | -2.88670922 | 0.005444301 | 0.02113113  |
| 203797_at   | -0.54869498 | -3.28738985 | 0.001712592 | 0.008006749 |
| 203798_s_at | -0.64546593 | -3.77840136 | 0.000371741 | 0.00222646  |
| 203799_at   | 0.205071533 | 2.27870421  | 0.026347314 | 0.07684619  |
| 203800_s_at | -0.01145312 | -0.24949867 | 0.803848079 | 0.889577278 |
| 203801_at   | 0.363308178 | 5.148242166 | 3.21E-06    | 4.19E-05    |
| 203802_x_at | 0.147537383 | 4.092476768 | 0.000132369 | 0.000934128 |
| 203803_at   | 0.059036229 | 0.844190341 | 0.401998225 | 0.58428348  |
| 203804_s_at | 0.328533632 | 4.779172714 | 1.22E-05    | 0.000126053 |
| 203805_s_at | -0.01867982 | -0.67651529 | 0.501376725 | 0.673667506 |
| 203806_s_at | 0.090350478 | 1.9849158   | 0.051844152 | 0.131171199 |
| 203807_x_at | 0.017715196 | 0.50881298  | 0.612794872 | 0.761207058 |
| 203808_at   | -0.01155803 | -0.30287331 | 0.763059599 | 0.863704185 |
| 203809_s_at | -0.07580075 | -2.41471497 | 0.018890245 | 0.05885276  |
| 203810_at   | 0.027673527 | 0.341829321 | 0.733702902 | 0.84485644  |
| 203811_s_at | -0.11109639 | -1.79907274 | 0.077159936 | 0.178507414 |
| 203812_at   | -0.21349542 | -4.75348226 | 1.34E-05    | 0.000136139 |
| 203813_s_at | -0.13582294 | -3.58069435 | 0.000697011 | 0.00378044  |
| 203814_s_at | 0.092166953 | 1.451969027 | 0.151846547 | 0.296851663 |
| 203815_at   | 0.018935038 | 0.122211722 | 0.903149734 | 0.948553918 |
| 203816_at   | -0.37688448 | -5.91339891 | 1.84E-07    | 4.05E-06    |
| 203817_at   | -1.08818778 | -7.20575649 | 1.26E-09    | 1.09E-07    |
| 203818_s_at | 0.171296479 | 3.829761786 | 0.000314851 | 0.001939003 |
| 203819_s_at | 0.052129746 | 2.055128528 | 0.04433537  | 0.116117931 |
| 203820_s_at | -0.00690938 | -0.33293342 | 0.740373428 | 0.849322859 |
| 203821_at   | 0.017233136 | 0.271912191 | 0.786645814 | 0.878304554 |
| 203822_s_at | 0.22532483  | 4.284164815 | 6.92E-05    | 0.000540032 |
| 203823_at   | 0.228874582 | 5.306034963 | 1.80E-06    | 2.60E-05    |
| 203824_at   | -0.01981097 | -0.23620789 | 0.814095503 | 0.895815739 |
| 203825_at   | 0.305495639 | 6.650028984 | 1.09E-08    | 4.76E-07    |
| 203826_s_at | -0.19521931 | -4.33875782 | 5.74E-05    | 0.000462537 |
| 203827_at   | 0.158891428 | 3.870947058 | 0.000275368 | 0.001730175 |
| 203828_s_at | 0.056518992 | 1.223883471 | 0.225897142 | 0.393425078 |
| 203829_at   | 0.149444127 | 3.445002129 | 0.00106196  | 0.005357388 |
| 203830_at   | -0.03549747 | -1.27516533 | 0.207286081 | 0.371036107 |
| 203831_at   | -0.05472772 | -1.25982394 | 0.212730105 | 0.377949647 |
| 203832_at   | 0.057424233 | 0.927771336 | 0.357334082 | 0.540402504 |
| 203833_s_at | 0.080387843 | 1.437804044 | 0.155811662 | 0.302343299 |
| 203834_s_at | -0.03420981 | -0.68652363 | 0.495092206 | 0.668358028 |
| 203835_at   | 0.182764318 | 2.643404133 | 0.010514375 | 0.036313867 |
| 203836_s_at | 0.174903022 | 2.513840902 | 0.014712426 | 0.047802816 |
| 203837_at   | 0.220902408 | 2.624057598 | 0.011062519 | 0.037839133 |
| 203838_s_at | -0.27783823 | -4.68114192 | 1.73E-05    | 0.000169093 |
| 203839_s_at | -0.21728107 | -4.99047048 | 5.72E-06    | 6.72E-05    |
| 203840_at   | -0.02423237 | -1.13616262 | 0.26051634  | 0.434780846 |
| 203841_x_at | -0.65022109 | -6.20708722 | 5.99E-08    | 1.70E-06    |
| 203842_s_at | -0.15525971 | -2.59358012 | 0.011979025 | 0.040411125 |
| 203843_at   | -0.32041161 | -4.78697992 | 1.19E-05    | 0.000123131 |
| 203844_at   | 0.012995951 | 0.75071217  | 0.45583161  | 0.63478099  |
| 203845_at   | 0.437433962 | 5.364507731 | 1.45E-06    | 2.17E-05    |
| 203846_at   | -0.02521916 | -0.73963378 | 0.462476729 | 0.640542022 |
| 203847_s_at | -0.14167419 | -2.64672232 | 0.010422889 | 0.036051372 |

|             |             |             |             |             |
|-------------|-------------|-------------|-------------|-------------|
| 203848_at   | -0.01382535 | -0.29752908 | 0.767115457 | 0.866455823 |
| 203849_s_at | 0.047530376 | 0.617387392 | 0.539372342 | 0.705178135 |
| 203850_s_at | -0.0583791  | -2.7874477  | 0.007151293 | 0.026512284 |
| 203851_at   | 0.038494107 | 0.792886835 | 0.431044123 | 0.611912329 |
| 203852_s_at | 0.067176444 | 1.419480831 | 0.161059759 | 0.309794825 |
| 203853_s_at | 0.484722817 | 7.080162183 | 2.05E-09    | 1.48E-07    |
| 203854_at   | 0.201248395 | 3.475804472 | 0.000965894 | 0.004953992 |
| 203855_at   | -0.58270796 | -6.82328875 | 5.56E-09    | 2.97E-07    |
| 203856_at   | -0.39053349 | -5.88352072 | 2.06E-07    | 4.42E-06    |
| 203857_s_at | -0.00049623 | -0.01415458 | 0.988754767 | 0.994786881 |
| 203858_s_at | -0.06714354 | -1.98444161 | 0.051898365 | 0.131278303 |
| 203859_s_at | -0.20759039 | -3.78302636 | 0.000366239 | 0.002197336 |
| 203860_at   | -0.01807899 | -0.50448171 | 0.615815751 | 0.763681557 |
| 203861_s_at | -0.77741161 | -8.0158706  | 5.40E-11    | 1.46E-08    |
| 203862_s_at | -0.63956007 | -8.64444    | 4.76E-12    | 4.02E-09    |
| 203863_at   | -0.73606864 | -9.07304633 | 9.22E-13    | 2.57E-09    |
| 203864_s_at | -0.64703564 | -7.35076027 | 7.16E-10    | 7.43E-08    |
| 203865_s_at | -0.54181682 | -5.86074511 | 2.25E-07    | 4.73E-06    |
| 203866_at   | -0.0160847  | -0.47898245 | 0.633734684 | 0.776692549 |
| 203867_s_at | -0.00022172 | -0.00728279 | 0.994213977 | 0.997322973 |
| 203868_s_at | 0.569733513 | 4.546522654 | 2.79E-05    | 0.00025238  |
| 203869_at   | -0.141743   | -1.7789454  | 0.080438385 | 0.184536332 |
| 203870_at   | 0.150444152 | 1.863167385 | 0.0674555   | 0.161180561 |
| 203871_at   | -0.10567737 | -2.65748975 | 0.010131002 | 0.035254594 |
| 203872_at   | -0.11879565 | -3.55518527 | 0.000754926 | 0.004044493 |
| 203873_at   | -0.0067412  | -0.13273933 | 0.894854555 | 0.943783829 |
| 203874_s_at | 0.132134896 | 2.082131064 | 0.04170889  | 0.110527941 |
| 203875_at   | 0.134223739 | 2.350298856 | 0.022147369 | 0.066897148 |
| 203876_s_at | 0.003163834 | 0.078778671 | 0.937477221 | 0.967424424 |
| 203877_at   | -0.00915967 | -0.1889324  | 0.850799003 | 0.918122108 |
| 203878_s_at | 0.052637806 | 1.384160108 | 0.171561423 | 0.324548834 |
| 203879_at   | 0.252645251 | 4.935461557 | 6.98E-06    | 7.96E-05    |
| 203880_at   | -0.14505945 | -2.11959267 | 0.03828937  | 0.103286153 |
| 203881_s_at | 0.311684888 | 2.694919017 | 0.009173496 | 0.032561502 |
| 203882_at   | 0.35758287  | 4.921133655 | 7.35E-06    | 8.29E-05    |
| 203883_s_at | -0.01718761 | -0.36067012 | 0.719643712 | 0.835838525 |
| 203884_s_at | -0.32489262 | -4.01013449 | 0.000174188 | 0.001172731 |
| 203885_at   | 0.014582705 | 0.171989547 | 0.864038676 | 0.926256093 |
| 203886_s_at | 0.028763834 | 0.58412657  | 0.561378424 | 0.722760738 |
| 203887_s_at | 0.125074128 | 2.03483136  | 0.046402776 | 0.120361745 |
| 203888_at   | -0.00138813 | -0.03623024 | 0.971221983 | 0.98539928  |
| 203889_at   | -1.05124121 | -6.2467687  | 5.15E-08    | 1.50E-06    |
| 203890_s_at | -0.01199039 | -0.32223121 | 0.748424987 | 0.854930684 |
| 203891_s_at | 0.041789478 | 0.751634822 | 0.455280674 | 0.634247639 |
| 203892_at   | -0.14522774 | -3.06030739 | 0.003333955 | 0.014042137 |
| 203893_at   | -0.23515516 | -4.17775407 | 9.93E-05    | 0.000732633 |
| 203894_at   | -0.1454905  | -2.4375195  | 0.01784447  | 0.056154418 |
| 203895_at   | 0.047856507 | 0.842468362 | 0.402953189 | 0.585206512 |
| 203896_s_at | 0.036631429 | 1.019177937 | 0.312310271 | 0.49326855  |
| 203897_at   | 0.032528391 | 0.523691566 | 0.602469229 | 0.753457432 |
| 203898_at   | -0.00173479 | -0.03579539 | 0.971567238 | 0.985637695 |
| 203899_s_at | -0.04997094 | -1.2511484  | 0.215855207 | 0.381847724 |
| 203900_at   | 0.068592688 | 2.35141026  | 0.022087168 | 0.0667514   |
| 203901_at   | 0.029566305 | 0.903530529 | 0.369945862 | 0.553130389 |
| 203902_at   | 0.039049221 | 1.463077002 | 0.14879265  | 0.29259315  |
| 203903_s_at | 0.627591456 | 5.88836857  | 2.02E-07    | 4.36E-06    |
| 203904_x_at | 0.067898475 | 1.485482042 | 0.142779426 | 0.283972891 |
| 203905_at   | 0.065744162 | 1.677226403 | 0.098828197 | 0.215591829 |
| 203906_at   | -0.33762664 | -6.17475446 | 6.78E-08    | 1.86E-06    |
| 203907_s_at | -0.31386011 | -5.43937904 | 1.10E-06    | 1.72E-05    |
| 203908_at   | -0.16675009 | -1.49499229 | 0.140285551 | 0.280445601 |
| 203909_at   | -0.43693937 | -5.26085282 | 2.12E-06    | 2.98E-05    |
| 203910_at   | 0.433618193 | 4.642268875 | 1.99E-05    | 0.000190266 |
| 203911_at   | -1.02557408 | -7.17748947 | 1.40E-09    | 1.16E-07    |
| 203912_s_at | 0.014315497 | 0.376544343 | 0.707873027 | 0.827914303 |
| 203913_s_at | -0.0210149  | -0.96300778 | 0.339503069 | 0.522344779 |
| 203914_x_at | 0.003268733 | 0.080237097 | 0.93632224  | 0.966929911 |
| 203915_at   | 0.057073792 | 0.678190537 | 0.500321776 | 0.672907596 |
| 203916_at   | 0.083457268 | 2.23578595  | 0.029190752 | 0.083296711 |
| 203917_at   | -0.14365475 | -1.63296253 | 0.107842295 | 0.230529864 |
| 203918_at   | 0.066061018 | 1.221626828 | 0.226743369 | 0.394242711 |
| 203919_at   | -0.35457263 | -4.45067689 | 3.90E-05    | 0.000335233 |
| 203920_at   | 0.133589602 | 4.068196483 | 0.000143569 | 0.000997575 |
| 203921_at   | -0.23423197 | -3.3820124  | 0.001287344 | 0.006299627 |
| 203922_s_at | 0.006524814 | 0.109279872 | 0.913354086 | 0.954041528 |

|             |             |             |             |             |
|-------------|-------------|-------------|-------------|-------------|
| 203923_s_at | 0.065999572 | 1.370821074 | 0.175661492 | 0.330220552 |
| 203924_at   | 0.012603979 | 0.358513246 | 0.721248377 | 0.837056628 |
| 203925_at   | 0.070384564 | 0.669087819 | 0.506068511 | 0.677597927 |
| 203926_x_at | -0.04075943 | -1.08551152 | 0.282143179 | 0.45944773  |
| 203927_at   | 0.163842767 | 4.703952786 | 1.60E-05    | 0.000158658 |
| 203928_x_at | 0.05187574  | 1.229616989 | 0.223757515 | 0.390908492 |
| 203929_s_at | 0.050421183 | 0.959542779 | 0.341230104 | 0.524153835 |
| 203930_s_at | -0.04124584 | -0.61804123 | 0.538944226 | 0.704943086 |
| 203931_s_at | -0.08728445 | -2.31811922 | 0.023955101 | 0.071278388 |
| 203932_at   | 0.082904745 | 1.344238963 | 0.184055094 | 0.341276615 |
| 203933_at   | -0.12859426 | -3.47668792 | 0.000963264 | 0.004944322 |
| 203934_at   | 0.077021883 | 1.907539289 | 0.061358165 | 0.149651774 |
| 203935_at   | 0.085491018 | 1.374852428 | 0.17441453  | 0.328494699 |
| 203936_s_at | 0.066428274 | 1.630150829 | 0.108436744 | 0.231449549 |
| 203937_s_at | 0.088478282 | 3.300854492 | 0.001644879 | 0.007747174 |
| 203938_s_at | 0.131129858 | 2.472416234 | 0.016344688 | 0.052184368 |
| 203939_at   | 0.014049966 | 0.217353786 | 0.828688097 | 0.904921651 |
| 203940_s_at | 0.286284054 | 4.874452677 | 8.69E-06    | 9.50E-05    |
| 203941_at   | 0.103371345 | 3.228817214 | 0.002038914 | 0.009253899 |
| 203942_s_at | -0.23588772 | -4.36911131 | 5.17E-05    | 0.000423662 |
| 203943_at   | -0.0595526  | -1.02748666 | 0.30841639  | 0.488941339 |
| 203944_x_at | -0.0899205  | -1.74862834 | 0.085595017 | 0.193446902 |
| 203945_at   | -0.06463483 | -1.54109136 | 0.128680769 | 0.263179614 |
| 203946_s_at | -0.47441514 | -5.26918026 | 2.06E-06    | 2.91E-05    |
| 203947_at   | -0.08554737 | -2.19433561 | 0.032190646 | 0.090147524 |
| 203948_s_at | -0.00346895 | -0.07389538 | 0.941345447 | 0.969525286 |
| 203949_at   | 0.08791333  | 2.313846448 | 0.024204748 | 0.071872874 |
| 203950_s_at | 0.031473749 | 0.83802122  | 0.405425901 | 0.58779259  |
| 203951_at   | 0.034560636 | 0.64243762  | 0.523096113 | 0.691806334 |
| 203952_at   | -0.03891506 | -1.19986042 | 0.235024914 | 0.403974212 |
| 203953_s_at | 0.065115085 | 1.678688188 | 0.098541365 | 0.215134125 |
| 203954_x_at | 0.044041613 | 0.922705384 | 0.35994654  | 0.543085337 |
| 203955_at   | 0.157031821 | 4.152367625 | 0.000108233 | 0.000787556 |
| 203956_at   | 0.368847499 | 4.79297681  | 1.16E-05    | 0.000121001 |
| 203957_at   | 0.111863702 | 3.449075268 | 0.001048755 | 0.005302746 |
| 203958_s_at | 0.088455748 | 2.521244302 | 0.014436734 | 0.04705415  |
| 203959_s_at | 0.086332417 | 2.412575962 | 0.018991103 | 0.059113412 |
| 203960_s_at | -0.15234255 | -3.20116462 | 0.002212541 | 0.009927004 |
| 203961_at   | 0.515430272 | 5.111871252 | 3.67E-06    | 4.68E-05    |
| 203962_s_at | 0.326948882 | 3.119005483 | 0.002813937 | 0.012176655 |
| 203963_at   | -1.17891835 | -7.21065901 | 1.23E-09    | 1.08E-07    |
| 203964_at   | 0.279721806 | 3.707582528 | 0.000466547 | 0.002701244 |
| 203965_at   | -0.04074842 | -1.17686676 | 0.244009674 | 0.414996588 |
| 203966_s_at | 0.065369771 | 1.30774685  | 0.196069417 | 0.356730759 |
| 203967_at   | -0.02511132 | -0.73679888 | 0.464186043 | 0.641914804 |
| 203968_s_at | -0.00226566 | -0.07723026 | 0.938703613 | 0.967994423 |
| 203969_at   | 0.033503402 | 1.192148071 | 0.238011349 | 0.407493228 |
| 203970_s_at | 0.065855339 | 1.289943478 | 0.202140635 | 0.364597105 |
| 203971_at   | 0.052370487 | 1.953471196 | 0.055546061 | 0.138553583 |
| 203972_s_at | -0.14571021 | -2.8424461  | 0.006152681 | 0.023404173 |
| 203973_s_at | 0.647626849 | 2.745887016 | 0.008002666 | 0.029113159 |
| 203974_at   | 0.009408144 | 0.22235881  | 0.824808192 | 0.902758253 |
| 203975_s_at | 0.015331021 | 0.382133705 | 0.703745343 | 0.825311262 |
| 203976_s_at | 0.067240396 | 1.476433062 | 0.145184622 | 0.287398287 |
| 203977_at   | 0.096516694 | 2.3868983   | 0.020240086 | 0.062191124 |
| 203978_at   | 0.086686187 | 2.081270489 | 0.041790465 | 0.110685047 |
| 203979_at   | 0.273358399 | 5.259498684 | 2.13E-06    | 2.99E-05    |
| 203980_at   | 0.010167177 | 0.303724413 | 0.762414288 | 0.863371493 |
| 203981_s_at | 0.124253364 | 2.873919452 | 0.005640816 | 0.021760842 |
| 203982_s_at | 0.021754902 | 0.548368836 | 0.585523008 | 0.740804956 |
| 203983_at   | -0.17608819 | -1.81212041 | 0.075094909 | 0.174757275 |
| 203984_s_at | 0.050430225 | 1.230368398 | 0.22347821  | 0.390607932 |
| 203985_at   | 0.057929368 | 1.624504296 | 0.109638564 | 0.233363988 |
| 203986_at   | 0.276329191 | 5.531362124 | 7.77E-07    | 1.30E-05    |
| 203987_at   | 0.279407828 | 3.273208165 | 0.001786748 | 0.008298177 |
| 203988_s_at | 0.214073857 | 2.636381655 | 0.010710412 | 0.03684342  |
| 203989_x_at | 0.109947248 | 5.222169243 | 2.45E-06    | 3.34E-05    |
| 203990_s_at | 0.045614924 | 1.3208941   | 0.191674724 | 0.351007039 |
| 203991_s_at | 0.230833259 | 4.565357579 | 2.61E-05    | 0.000239156 |
| 203992_s_at | 0.244828316 | 3.785136327 | 0.000363755 | 0.002183898 |
| 203993_x_at | 0.005010912 | 0.131849457 | 0.895555286 | 0.944099563 |
| 203994_s_at | -0.01391644 | -0.4135235  | 0.680733432 | 0.808830185 |
| 203995_at   | -0.00670452 | -0.14996245 | 0.8813095   | 0.936548511 |
| 203996_s_at | 0.085303813 | 1.733227013 | 0.088317869 | 0.198097977 |
| 203997_at   | 0.115821016 | 1.660915891 | 0.102075252 | 0.221117935 |

|             |             |             |             |             |
|-------------|-------------|-------------|-------------|-------------|
| 203998_s_at | -1.09165196 | -5.65432057 | 4.90E-07    | 8.89E-06    |
| 203999_at   | -1.0067946  | -5.03982143 | 4.78E-06    | 5.81E-05    |
| 204000_at   | -0.45138833 | -6.43332437 | 2.51E-08    | 8.67E-07    |
| 204001_at   | -0.11846408 | -2.69132065 | 0.009261813 | 0.032817644 |
| 204002_s_at | -0.15432059 | -4.39037812 | 4.80E-05    | 0.000397783 |
| 204003_s_at | -0.06744833 | -1.6212001  | 0.11034683  | 0.234488343 |
| 204004_at   | 0.280653459 | 3.807919811 | 0.000337942 | 0.002055709 |
| 204005_s_at | 0.045293574 | 1.383336916 | 0.171812305 | 0.324884092 |
| 204006_s_at | 0.036168538 | 0.249282051 | 0.804014822 | 0.889671684 |
| 204007_at   | 0.058035473 | 0.976389959 | 0.332887163 | 0.515537913 |
| 204008_at   | -0.23987642 | -6.05163541 | 1.09E-07    | 2.69E-06    |
| 204009_s_at | -0.00593172 | -0.06975135 | 0.944629193 | 0.971451783 |
| 204010_s_at | -0.00473895 | -0.20944997 | 0.834823857 | 0.908934609 |
| 204011_at   | 0.259444026 | 3.544827602 | 0.000779726 | 0.00414654  |
| 204012_s_at | 0.100030747 | 2.244449772 | 0.028595839 | 0.08196019  |
| 204013_s_at | 0.046730213 | 1.651568005 | 0.103975136 | 0.22430548  |
| 204014_at   | -0.03611817 | -1.64056439 | 0.106248355 | 0.227852758 |
| 204015_s_at | -0.03406351 | -0.80150087 | 0.426081727 | 0.607414499 |
| 204016_at   | -0.04077389 | -0.99397457 | 0.324324325 | 0.506453625 |
| 204017_at   | -0.00722679 | -0.13879991 | 0.890084441 | 0.94117201  |
| 204018_x_at | -0.02060436 | -0.09064481 | 0.92808413  | 0.962387432 |
| 204019_s_at | 0.015616718 | 0.28728229  | 0.774910215 | 0.871065937 |
| 204020_at   | 0.187387005 | 4.373223909 | 5.09E-05    | 0.000418308 |
| 204021_s_at | 0.237880343 | 4.354283375 | 5.44E-05    | 0.000442063 |
| 204022_at   | 0.23679903  | 5.031528243 | 4.92E-06    | 5.95E-05    |
| 204023_at   | 0.021983857 | 0.666710528 | 0.50757519  | 0.67871078  |
| 204024_at   | 0.136315787 | 2.472476884 | 0.016342183 | 0.052180099 |
| 204025_s_at | -0.00552781 | -0.24713509 | 0.805667969 | 0.890595639 |
| 204026_s_at | -0.18369568 | -3.34661367 | 0.001433165 | 0.006898331 |
| 204027_s_at | -0.07242888 | -1.46396281 | 0.148551202 | 0.292263177 |
| 204028_s_at | 0.245553534 | 4.719685334 | 1.51E-05    | 0.000150983 |
| 204029_at   | -0.17444075 | -2.81992482 | 0.006544927 | 0.024619634 |
| 204030_s_at | 0.192099797 | 2.609096715 | 0.011504122 | 0.039106041 |
| 204031_s_at | 0.021278549 | 0.333966344 | 0.73959786  | 0.848943283 |
| 204032_at   | 0.207343206 | 3.803471908 | 0.000342839 | 0.002079837 |
| 204033_at   | 0.061698035 | 1.722668342 | 0.090225652 | 0.201306217 |
| 204034_at   | -0.0625859  | -1.55431872 | 0.125496113 | 0.258357008 |
| 204035_at   | -1.00767887 | -4.317284   | 6.18E-05    | 0.000490772 |
| 204036_at   | 0.440490143 | 4.227669962 | 8.39E-05    | 0.000634689 |
| 204037_at   | 0.573975149 | 4.677149392 | 1.76E-05    | 0.000171165 |
| 204038_s_at | -0.01616997 | -0.2433536  | 0.808581854 | 0.892374605 |
| 204039_at   | -0.03201188 | -0.60549344 | 0.547190504 | 0.710772863 |
| 204040_at   | -0.05072224 | -0.85504479 | 0.396010745 | 0.578688908 |
| 204041_at   | 0.477139229 | 4.615026403 | 2.19E-05    | 0.000206387 |
| 204042_at   | 0.10931345  | 1.703383394 | 0.093797898 | 0.207392058 |
| 204043_at   | 0.116954034 | 3.262730891 | 0.001843468 | 0.008524393 |
| 204044_at   | 0.086202723 | 2.734696729 | 0.008247303 | 0.029828312 |
| 204045_at   | -0.11377287 | -2.51111447 | 0.014815148 | 0.048077155 |
| 204046_at   | -0.03719194 | -1.02876534 | 0.307820072 | 0.488195152 |
| 204047_s_at | -0.01403065 | -0.28353025 | 0.777770283 | 0.87253651  |
| 204048_s_at | 0.373123283 | 5.657621454 | 4.84E-07    | 8.82E-06    |
| 204049_s_at | 0.41808042  | 4.995159151 | 5.62E-06    | 6.62E-05    |
| 204050_s_at | -0.02310475 | -0.41542636 | 0.679347933 | 0.808030413 |
| 204051_s_at | 0.079175439 | 1.513213086 | 0.135603628 | 0.273557703 |
| 204052_s_at | 0.040353954 | 1.282440468 | 0.20474097  | 0.367865379 |
| 204053_x_at | 0.069084764 | 1.265094665 | 0.21084792  | 0.375621448 |
| 204054_at   | -0.0002342  | -0.00768317 | 0.993895891 | 0.997225798 |
| 204055_s_at | 0.05295718  | 1.821603768 | 0.073623215 | 0.172171457 |
| 204056_s_at | 0.087046748 | 2.202610684 | 0.031570959 | 0.088712311 |
| 204057_at   | 0.078923971 | 1.333844101 | 0.187419028 | 0.345393229 |
| 204058_at   | -0.04810956 | -0.60032971 | 0.550602563 | 0.713509909 |
| 204059_s_at | -0.15438933 | -1.86450898 | 0.06726391  | 0.160834554 |
| 204060_s_at | 0.546290735 | 7.140480672 | 1.62E-09    | 1.27E-07    |
| 204061_at   | 0.553974529 | 5.981896634 | 1.42E-07    | 3.31E-06    |
| 204062_s_at | -0.17307389 | -2.66091855 | 0.010039632 | 0.035023904 |
| 204063_s_at | -0.01003637 | -0.12473245 | 0.901162517 | 0.947306955 |
| 204064_at   | 0.173437909 | 4.013447117 | 0.000172283 | 0.001161338 |
| 204065_at   | -0.08453378 | -2.5434817  | 0.013636517 | 0.044917689 |
| 204066_s_at | -0.11062887 | -1.1134878  | 0.270048161 | 0.445777957 |
| 204067_at   | 0.070153403 | 1.620450932 | 0.110507932 | 0.234667893 |
| 204068_at   | 0.401399316 | 5.629540274 | 5.38E-07    | 9.60E-06    |
| 204069_at   | 0.110542118 | 2.222185759 | 0.030146669 | 0.085451573 |
| 204070_at   | 0.974573078 | 6.690386004 | 9.30E-09    | 4.25E-07    |
| 204071_s_at | 0.052110814 | 1.261781512 | 0.212029604 | 0.377080266 |
| 204072_s_at | -0.69161764 | -6.53141091 | 1.72E-08    | 6.62E-07    |



|             |             |             |             |             |
|-------------|-------------|-------------|-------------|-------------|
| 204073_s_at | 0.452603964 | 3.580884132 | 0.000696597 | 0.003779108 |
| 204074_s_at | 0.084421682 | 2.429562314 | 0.018203312 | 0.057094703 |
| 204075_s_at | 0.004421442 | 0.208775504 | 0.835347927 | 0.909040141 |
| 204076_at   | -0.1610946  | -2.04086265 | 0.045779923 | 0.119147236 |
| 204077_x_at | 0.093980711 | 1.955902793 | 0.055251944 | 0.137990259 |
| 204078_at   | 0.050812032 | 1.164618275 | 0.248895585 | 0.421254316 |
| 204079_at   | 0.416812981 | 5.640951981 | 5.15E-07    | 9.28E-06    |
| 204080_at   | 0.025314014 | 0.653356935 | 0.516083132 | 0.686084458 |
| 204081_at   | -1.29969079 | -7.52247218 | 3.67E-10    | 4.79E-08    |
| 204082_at   | -0.4650636  | -6.90196578 | 4.10E-09    | 2.40E-07    |
| 204083_s_at | 0.411242923 | 5.179801355 | 2.86E-06    | 3.80E-05    |
| 204084_s_at | 0.125350114 | 2.316936667 | 0.024023965 | 0.071459502 |
| 204085_s_at | 0.202541138 | 3.658823369 | 0.000544832 | 0.003079869 |
| 204086_at   | 0.033980077 | 0.696160884 | 0.489081734 | 0.663470658 |
| 204087_s_at | 0.042449827 | 0.82469723  | 0.412889833 | 0.595183232 |
| 204088_at   | 0.078163167 | 1.977158785 | 0.052737131 | 0.132926957 |
| 204089_x_at | 0.177272835 | 3.976899172 | 0.000194454 | 0.001286152 |
| 204090_at   | 0.006850549 | 0.183974698 | 0.854668819 | 0.920541456 |
| 204091_at   | -0.03269374 | -0.65273831 | 0.516479105 | 0.686284241 |
| 204092_s_at | -0.01931093 | -0.45309322 | 0.652155837 | 0.78920551  |
| 204093_at   | -0.17208467 | -1.92105727 | 0.059596244 | 0.146216257 |
| 204094_s_at | 0.394222025 | 3.900356736 | 0.000250133 | 0.001594261 |
| 204095_s_at | -0.01883671 | -0.38993261 | 0.698000894 | 0.821203392 |
| 204096_s_at | -0.11930201 | -3.46942805 | 0.000985077 | 0.005034311 |
| 204097_s_at | 0.185099842 | 4.350668131 | 5.51E-05    | 0.000446788 |
| 204098_at   | 0.082443131 | 2.242265779 | 0.028744788 | 0.082286834 |
| 204099_at   | -0.41335646 | -5.62749066 | 5.42E-07    | 9.67E-06    |
| 204100_at   | -0.14622565 | -2.0884342  | 0.041115611 | 0.109312247 |
| 204101_at   | 0.042910284 | 1.17256295  | 0.245718528 | 0.417125097 |
| 204102_s_at | -0.0624037  | -1.72034931 | 0.090649189 | 0.202009154 |
| 204103_at   | 0.070662659 | 1.257179758 | 0.213679021 | 0.379138589 |
| 204104_at   | -0.16955939 | -3.06087426 | 0.003328529 | 0.014027216 |
| 204105_s_at | 0.051145945 | 0.869104761 | 0.388337678 | 0.571057763 |
| 204106_at   | -0.12077926 | -2.30117089 | 0.024959013 | 0.073628266 |
| 204107_at   | 0.063868155 | 1.715087317 | 0.091616299 | 0.203707246 |
| 204108_at   | 0.137579507 | 4.100403072 | 0.000128899 | 0.00091426  |
| 204109_s_at | 0.028850953 | 0.632249722 | 0.529684311 | 0.697115591 |
| 204110_at   | 0.036904747 | 1.109523571 | 0.271739494 | 0.447693496 |
| 204111_at   | -0.01010439 | -0.439109   | 0.662198409 | 0.796061458 |
| 204112_s_at | 0.40685695  | 3.20130953  | 0.002211596 | 0.009924756 |
| 204113_at   | -0.24210111 | -4.07771404 | 0.000139074 | 0.000972538 |
| 204114_at   | -0.03281008 | -0.88463172 | 0.379972752 | 0.562632809 |
| 204115_at   | 0.304895039 | 3.926347966 | 0.000229696 | 0.001484752 |
| 204116_at   | 0.041708338 | 0.883358161 | 0.38065456  | 0.563449968 |
| 204117_at   | -0.10631629 | -2.93120855 | 0.004808905 | 0.019107361 |
| 204118_at   | 0.062599502 | 1.454652896 | 0.151104226 | 0.295840455 |
| 204119_s_at | -0.37478722 | -5.48986514 | 9.08E-07    | 1.48E-05    |
| 204120_s_at | -0.08320258 | -2.67193784 | 0.009751065 | 0.034193377 |
| 204121_at   | 0.286950265 | 4.221009448 | 8.58E-05    | 0.000647575 |
| 204122_at   | 0.380251308 | 2.741265698 | 0.008102876 | 0.029393972 |
| 204123_at   | 0.044286698 | 1.30192929  | 0.198038035 | 0.359143219 |
| 204124_at   | -0.03346446 | -1.06125195 | 0.292932258 | 0.471451204 |
| 204125_at   | -0.18797954 | -2.7824858  | 0.007248364 | 0.026803232 |
| 204126_s_at | -0.05229793 | -1.2068535  | 0.232340609 | 0.400835544 |
| 204127_at   | 0.012849801 | 0.278679069 | 0.781472764 | 0.875110485 |
| 204128_s_at | -0.05855981 | -2.09506991 | 0.040498965 | 0.107936058 |
| 204129_at   | 0.146591776 | 5.42180703  | 1.17E-06    | 1.81E-05    |
| 204130_at   | -0.10530855 | -1.91763693 | 0.060037931 | 0.147122228 |
| 204131_s_at | 0.265524304 | 4.441205939 | 4.03E-05    | 0.000344194 |
| 204132_s_at | 0.00252184  | 0.048451801 | 0.961521031 | 0.980399124 |
| 204133_at   | -0.00298462 | -0.08709236 | 0.930895189 | 0.964049769 |
| 204134_at   | -0.85182034 | -7.29525206 | 8.89E-10    | 8.72E-08    |
| 204135_at   | 0.049345141 | 1.143342237 | 0.257548608 | 0.431244457 |
| 204136_at   | 0.056496552 | 1.340066016 | 0.185399972 | 0.343030244 |
| 204137_at   | -0.0725141  | -0.82821207 | 0.410912794 | 0.593169076 |
| 204138_s_at | -0.01279022 | -0.3906256  | 0.697491307 | 0.820998255 |
| 204139_x_at | -0.0501298  | -1.23980265 | 0.219993174 | 0.386912251 |
| 204140_at   | 0.327317252 | 2.319060518 | 0.023900412 | 0.071158299 |
| 204141_at   | -0.47260363 | -4.0462538  | 0.000154474 | 0.001059673 |
| 204142_at   | 0.166409596 | 2.649481926 | 0.010347358 | 0.035840048 |
| 204143_s_at | 0.134365968 | 1.150060815 | 0.254793311 | 0.428019582 |
| 204144_s_at | 0.043036257 | 1.160205459 | 0.250672935 | 0.423316638 |
| 204145_at   | -0.09754135 | -2.08981683 | 0.040986456 | 0.109046715 |
| 204146_at   | -0.01314367 | -0.89652184 | 0.373644535 | 0.55676063  |
| 204147_s_at | -0.03429048 | -0.99704262 | 0.322845545 | 0.504797015 |

|             |             |             |             |             |
|-------------|-------------|-------------|-------------|-------------|
| 204148_s_at | 0.146836368 | 1.314675022 | 0.193744207 | 0.353748253 |
| 204149_s_at | -0.25709699 | -4.28296185 | 6.95E-05    | 0.000541879 |
| 204150_at   | 0.209038336 | 2.384149214 | 0.020378068 | 0.062520533 |
| 204151_x_at | 0.480333215 | 5.420589926 | 1.18E-06    | 1.82E-05    |
| 204152_s_at | 0.06902073  | 1.91074199  | 0.060936777 | 0.148843331 |
| 204153_s_at | 0.118581961 | 2.040607488 | 0.045806127 | 0.119208492 |
| 204154_at   | -0.41761761 | -5.58622899 | 6.33E-07    | 1.09E-05    |
| 204155_s_at | -0.08617908 | -1.75593445 | 0.08432789  | 0.191231078 |
| 204156_at   | -0.21801839 | -1.99829545 | 0.050334384 | 0.128142653 |
| 204157_s_at | -0.13672452 | -1.5104792  | 0.136298117 | 0.274537383 |
| 204158_s_at | 0.125912631 | 2.975860915 | 0.004241084 | 0.017218616 |
| 204159_at   | 0.246040637 | 4.97828682  | 5.97E-06    | 6.97E-05    |
| 204160_s_at | -0.00120694 | -0.01046403 | 0.991686625 | 0.996144445 |
| 204161_s_at | 0.143660761 | 1.645251317 | 0.105275195 | 0.226341417 |
| 204162_at   | -0.00976819 | -0.52584317 | 0.600982708 | 0.752398431 |
| 204163_at   | 0.114470067 | 2.217245843 | 0.030500653 | 0.086230717 |
| 204164_at   | 0.182280459 | 4.442009114 | 4.02E-05    | 0.000343366 |
| 204165_at   | -1.03707559 | -7.68703088 | 1.94E-10    | 3.19E-08    |
| 204166_at   | 0.04608388  | 0.821499914 | 0.41469328  | 0.59689121  |
| 204167_at   | 0.165095608 | 2.95383979  | 0.004512835 | 0.018142271 |
| 204168_at   | 0.062876853 | 1.849544165 | 0.069427218 | 0.1647468   |
| 204169_at   | -0.18095032 | -3.71705847 | 0.000452637 | 0.002633329 |
| 204170_s_at | -0.00718537 | -0.11825087 | 0.906273529 | 0.950310329 |
| 204171_at   | 0.127707212 | 2.302848781 | 0.024857985 | 0.07339065  |
| 204172_at   | 0.147626558 | 1.868734702 | 0.066663442 | 0.159697822 |
| 204173_at   | -0.46881589 | -6.79598816 | 6.18E-09    | 3.20E-07    |
| 204174_at   | 0.084122101 | 0.704078757 | 0.484173912 | 0.659073479 |
| 204175_at   | -0.00300385 | -0.05408315 | 0.957052988 | 0.978025456 |
| 204176_at   | -0.00541835 | -0.09645313 | 0.923490001 | 0.959924207 |
| 204177_s_at | 0.044393118 | 1.039573208 | 0.302811065 | 0.482468168 |
| 204178_s_at | 0.18474518  | 3.877169051 | 0.000269833 | 0.001698503 |
| 204179_at   | -0.03138223 | -0.60843204 | 0.545253556 | 0.709373364 |
| 204180_s_at | 0.134218994 | 2.268742662 | 0.026984479 | 0.078219634 |
| 204181_s_at | 0.030396135 | 0.66703113  | 0.507371858 | 0.67866225  |
| 204182_s_at | -0.1138735  | -1.88406132 | 0.064523419 | 0.155714706 |
| 204183_s_at | -0.03910566 | -0.90186404 | 0.370823192 | 0.554052891 |
| 204184_s_at | 0.068840226 | 1.546346254 | 0.127407957 | 0.261206708 |
| 204185_x_at | 0.075039096 | 0.706803027 | 0.482491652 | 0.657559492 |
| 204186_s_at | -0.02589119 | -0.25934335 | 0.796279777 | 0.88428923  |
| 204187_at   | 0.709339579 | 6.098912363 | 9.07E-08    | 2.34E-06    |
| 204188_s_at | 0.072084389 | 1.588109949 | 0.117646093 | 0.246026821 |
| 204189_at   | -0.0147977  | -0.29137168 | 0.771796562 | 0.869271324 |
| 204190_at   | 0.026782366 | 0.615003835 | 0.540934498 | 0.706367994 |
| 204191_at   | 0.053461015 | 1.483250124 | 0.143369731 | 0.284752724 |
| 204192_at   | 0.164515482 | 2.304210498 | 0.024776261 | 0.073195444 |
| 204193_at   | 0.050734531 | 1.231750123 | 0.222965281 | 0.390101484 |
| 204194_at   | 0.18247977  | 3.955137267 | 0.000208935 | 0.001366964 |
| 204195_s_at | -0.01997944 | -0.45516642 | 0.650672435 | 0.788349621 |
| 204196_x_at | -0.05387434 | -1.89450455 | 0.063098803 | 0.153045247 |
| 204197_s_at | 0.137398854 | 3.330037025 | 0.001506696 | 0.007188008 |
| 204198_s_at | 0.068044689 | 2.06263726  | 0.043591012 | 0.114537569 |
| 204199_at   | -0.08504157 | -1.78411719 | 0.079585085 | 0.182907365 |
| 204200_s_at | -0.08054677 | -1.68712099 | 0.096899959 | 0.212499419 |
| 204201_s_at | 0.364264453 | 4.366497118 | 5.21E-05    | 0.000427264 |
| 204202_at   | -0.00897675 | -0.14454013 | 0.885570224 | 0.938665792 |
| 204203_at   | 0.053672661 | 0.801578609 | 0.426037101 | 0.607394744 |
| 204204_at   | 0.13207102  | 1.228760687 | 0.224076121 | 0.3912049   |
| 204205_at   | 0.152864213 | 3.634302904 | 0.000588798 | 0.003287268 |
| 204206_at   | 0.019834807 | 0.399052046 | 0.691306236 | 0.816529898 |
| 204207_s_at | 0.027607418 | 0.708777949 | 0.481274162 | 0.656563216 |
| 204208_at   | 0.039983842 | 1.380009207 | 0.172829352 | 0.32631371  |
| 204209_at   | 0.019202168 | 0.457924932 | 0.648700879 | 0.786878181 |
| 204210_s_at | -0.03426785 | -1.58340027 | 0.118715896 | 0.247603642 |
| 204211_x_at | 0.024582976 | 1.073621414 | 0.28739611  | 0.465558989 |
| 204212_at   | -0.100247   | -2.32125126 | 0.023773562 | 0.070889246 |
| 204213_at   | 0.010061813 | 0.229714643 | 0.819113922 | 0.899212484 |
| 204214_s_at | -0.00269005 | -0.09386396 | 0.925537605 | 0.960924883 |
| 204215_at   | 0.175177823 | 3.088112783 | 0.003077334 | 0.013124553 |
| 204216_s_at | -0.07156407 | -2.63432355 | 0.010768493 | 0.037010167 |
| 204217_s_at | -0.70403361 | -9.20933879 | 5.48E-13    | 2.04E-09    |
| 204218_at   | -0.16337982 | -3.88277115 | 0.000264941 | 0.001672924 |
| 204219_s_at | -0.03232289 | -0.76413078 | 0.447857038 | 0.627449115 |
| 204220_at   | 0.066690037 | 1.335785155 | 0.186787363 | 0.344686974 |
| 204221_x_at | -0.06752308 | -1.52432319 | 0.132810138 | 0.269381442 |
| 204222_s_at | -0.07941138 | -1.73495622 | 0.088008631 | 0.197667532 |

|             |             |             |             |             |
|-------------|-------------|-------------|-------------|-------------|
| 204223_at   | 0.242166928 | 3.398395477 | 0.001224716 | 0.006041394 |
| 204224_s_at | -0.44785874 | -5.58084854 | 6.46E-07    | 1.11E-05    |
| 204225_at   | 0.250687003 | 4.878510603 | 8.57E-06    | 9.39E-05    |
| 204226_at   | -0.236036   | -5.65016897 | 4.98E-07    | 9.01E-06    |
| 204227_s_at | 0.081850417 | 2.701321854 | 0.009018251 | 0.032094574 |
| 204228_at   | -0.15845768 | -3.94045207 | 0.000219289 | 0.001426349 |
| 204229_at   | 0.032042684 | 0.389523773 | 0.698301592 | 0.821405873 |
| 204230_s_at | -0.08762994 | -0.92096246 | 0.360848188 | 0.543913228 |
| 204231_s_at | -0.17756389 | -2.80837005 | 0.006755008 | 0.025284321 |
| 204232_at   | 0.162198468 | 1.671176978 | 0.100022496 | 0.217655342 |
| 204233_s_at | 0.091790009 | 1.525887509 | 0.132420508 | 0.268774119 |
| 204234_s_at | -0.09039707 | -2.60286079 | 0.011692881 | 0.039613269 |
| 204235_s_at | -0.34350082 | -3.88729266 | 0.000261055 | 0.001652612 |
| 204236_at   | 0.095363584 | 2.720908578 | 0.008558164 | 0.030748572 |
| 204237_at   | -0.25937278 | -3.40035054 | 0.001217439 | 0.006008809 |
| 204238_s_at | 0.12500296  | -1.37651941 | 0.173900892 | 0.327799808 |
| 204239_s_at | -0.33314883 | -4.33836773 | 5.74E-05    | 0.000462907 |
| 204240_s_at | 0.036421162 | 0.691332913 | 0.492087747 | 0.666032272 |
| 204241_at   | 0.096397959 | 2.448888962 | 0.017342774 | 0.054853733 |
| 204242_s_at | 0.089589113 | 2.909999923 | 0.005102632 | 0.020039264 |
| 204243_at   | 0.080087809 | 1.866636846 | 0.066960975 | 0.160264548 |
| 204244_s_at | -0.13076478 | -4.02095504 | 0.000168041 | 0.001136684 |
| 204245_s_at | -0.22010658 | -4.31746636 | 6.17E-05    | 0.000490552 |
| 204246_s_at | -0.39846983 | -5.81842865 | 2.64E-07    | 5.39E-06    |
| 204247_s_at | -0.74669833 | -7.85844093 | 9.95E-11    | 2.10E-08    |
| 204248_at   | -0.02993852 | -0.72802208 | 0.469500871 | 0.646245123 |
| 204249_s_at | 0.20274587  | 1.683585523 | 0.097585371 | 0.213620955 |
| 204250_s_at | 0.034750541 | 0.810995839 | 0.420651647 | 0.602614463 |
| 204251_s_at | 0.132652583 | 3.414062354 | 0.001167535 | 0.005798363 |
| 204252_at   | 0.136714314 | 3.014880731 | 0.003796604 | 0.015694411 |
| 204253_s_at | -0.00809943 | -0.17357362 | 0.862799109 | 0.92537618  |
| 204254_s_at | 0.026634724 | 1.0405095   | 0.302379763 | 0.481998954 |
| 204255_s_at | -0.05407474 | -1.81995001 | 0.073878102 | 0.172632025 |
| 204256_at   | 0.144196918 | 2.064051692 | 0.043452014 | 0.114273122 |
| 204257_at   | 0.152254195 | 2.987946221 | 0.004098493 | 0.016735481 |
| 204258_at   | 0.284292863 | 3.828325697 | 0.000316322 | 0.001946449 |
| 204259_at   | 0.004753044 | 0.166077161 | 0.868668236 | 0.928835103 |
| 204260_at   | -0.78412467 | -5.17111445 | 2.96E-06    | 3.90E-05    |
| 204261_s_at | -0.05100967 | -1.43753549 | 0.155887608 | 0.302462836 |
| 204262_s_at | -0.02981868 | -0.88187383 | 0.381450175 | 0.564192846 |
| 204263_s_at | 0.110240223 | 2.949820905 | 0.004564143 | 0.018310655 |
| 204264_at   | 0.160482254 | 4.488895285 | 3.41E-05    | 0.000299108 |
| 204265_s_at | 0.087385044 | 1.658817757 | 0.102499196 | 0.221770627 |
| 204266_s_at | 0.22412723  | 4.559285884 | 2.67E-05    | 0.000243337 |
| 204267_x_at | -0.00794078 | -0.20675056 | 0.8369218   | 0.910025243 |
| 204268_at   | 0.181206589 | 4.843161693 | 9.73E-06    | 0.000104356 |
| 204269_at   | -0.09767329 | -2.74105081 | 0.008107564 | 0.029408589 |
| 204270_at   | 0.125931486 | 2.443967499 | 0.017558363 | 0.055436364 |
| 204271_s_at | -0.03699439 | -0.39810131 | 0.692003034 | 0.817093913 |
| 204272_at   | -0.0038467  | -0.07761005 | 0.938402792 | 0.967743443 |
| 204273_at   | 0.242665262 | 1.538495512 | 0.129313252 | 0.264134729 |
| 204274_at   | 0.003963647 | 0.05941288  | 0.952825521 | 0.975772283 |
| 204275_at   | -0.07398753 | -2.19097763 | 0.032445144 | 0.090672736 |
| 204276_at   | 0.058476279 | 1.40604499  | 0.164994309 | 0.315493993 |
| 204277_s_at | 0.001502287 | 0.036766685 | 0.970796072 | 0.985214037 |
| 204278_s_at | -0.05544561 | -1.01376491 | 0.314864886 | 0.496175617 |
| 204279_at   | 0.358111275 | 4.023728819 | 0.000166499 | 0.001127791 |
| 204280_at   | -1.06653741 | -8.77123549 | 2.93E-12    | 3.44E-09    |
| 204281_at   | 0.029204135 | 0.77859485  | 0.439352915 | 0.61984849  |
| 204282_s_at | -0.03232392 | -0.73184243 | 0.467183212 | 0.644444338 |
| 204283_at   | -0.15035593 | -4.2727029  | 7.19E-05    | 0.000558873 |
| 204284_at   | 0.097691219 | 0.874749754 | 0.385283295 | 0.567913315 |
| 204285_s_at | 0.222487685 | 2.707024449 | 0.008882014 | 0.031677835 |
| 204286_s_at | 0.056587928 | 2.39247917  | 0.019962539 | 0.061482033 |
| 204287_at   | -0.2497778  | -3.92528583 | 0.000230499 | 0.001489295 |
| 204288_s_at | -0.78318108 | -8.12912873 | 3.48E-11    | 1.20E-08    |
| 204289_at   | 0.062116117 | 1.237022096 | 0.221016136 | 0.387921813 |
| 204290_s_at | 0.192842506 | 2.893056375 | 0.005349148 | 0.020831659 |
| 204291_at   | 0.146597679 | 2.374481596 | 0.020870014 | 0.063754057 |
| 204292_x_at | -0.05286963 | -0.87419214 | 0.385584334 | 0.568224192 |
| 204293_at   | 0.081210674 | 2.129708581 | 0.037408966 | 0.10141835  |
| 204294_at   | 0.071513204 | 1.797539512 | 0.077405684 | 0.178956848 |
| 204295_at   | 0.143652861 | 2.122321242 | 0.038050136 | 0.10277009  |
| 204296_at   | 0.027996894 | 1.053611062 | 0.296388518 | 0.47538744  |
| 204297_at   | 0.195145543 | 3.501764326 | 0.000891398 | 0.004633982 |

|             |             |             |             |             |
|-------------|-------------|-------------|-------------|-------------|
| 204298_s_at | 0.026022841 | 0.842932245 | 0.402695795 | 0.585030084 |
| 204299_at   | 0.060728322 | 0.975551676 | 0.333299071 | 0.516014899 |
| 204300_at   | 0.01032002  | 0.242195127 | 0.809475081 | 0.892992639 |
| 204301_at   | 0.116375382 | 1.825971327 | 0.072953607 | 0.170954414 |
| 204302_s_at | -0.06944549 | -2.01382085 | 0.048630003 | 0.124777361 |
| 204303_s_at | 0.027427807 | 0.484741166 | 0.629668075 | 0.773724275 |
| 204304_s_at | 0.132828589 | 2.15687683  | 0.035131392 | 0.09654976  |
| 204305_at   | 0.059578847 | 1.628925604 | 0.108696611 | 0.231866993 |
| 204306_s_at | 0.14437502  | 3.19442116  | 0.002256942 | 0.010097833 |
| 204307_at   | 0.354925565 | 5.849075268 | 2.35E-07    | 4.89E-06    |
| 204308_s_at | 0.314884574 | 5.487402481 | 9.16E-07    | 1.49E-05    |
| 204309_at   | 0.147009394 | 3.242447974 | 0.001958124 | 0.008949937 |
| 204310_s_at | -0.10126195 | -2.36406128 | 0.021412125 | 0.065111974 |
| 204311_at   | 0.174817162 | 2.639700873 | 0.010617342 | 0.036598886 |
| 204312_x_at | -0.09500898 | -1.3672011  | 0.176787012 | 0.331666742 |
| 204313_s_at | -0.01313786 | -0.17078948 | 0.86497798  | 0.926907301 |
| 204314_s_at | 0.227175386 | 4.279536972 | 7.03E-05    | 0.000546924 |
| 204315_s_at | -0.01872427 | -0.44189918 | 0.660189621 | 0.794570189 |
| 204316_at   | 0.086428544 | 3.043951464 | 0.003494105 | 0.014625149 |
| 204317_at   | -0.00045898 | -0.01588142 | 0.987382971 | 0.993941827 |
| 204318_s_at | 0.042047985 | 0.927564215 | 0.357440651 | 0.54050791  |
| 204319_s_at | 0.203397141 | 1.816487285 | 0.074414193 | 0.173576154 |
| 204320_at   | 0.011884119 | 0.199389563 | 0.842648674 | 0.91360367  |
| 204321_at   | 0.279954565 | 4.190766757 | 9.51E-05    | 0.000705495 |
| 204322_at   | -0.01882349 | -0.33443878 | 0.739243226 | 0.848876112 |
| 204323_x_at | 0.087353544 | 2.45827415  | 0.016938236 | 0.053791205 |
| 204324_s_at | 0.700747268 | 5.188259995 | 2.78E-06    | 3.70E-05    |
| 204325_s_at | -0.19236696 | -5.59586642 | 6.10E-07    | 1.06E-05    |
| 204326_x_at | 0.89968998  | 4.809077589 | 1.10E-05    | 0.000115432 |
| 204327_s_at | 0.076530394 | 2.059561578 | 0.043894592 | 0.115200013 |
| 204328_at   | 0.237908501 | 4.304450055 | 6.45E-05    | 0.00050923  |
| 204329_s_at | 0.008065248 | 0.219088197 | 0.827343088 | 0.904195886 |
| 204330_s_at | -0.03192988 | -1.35138279 | 0.181769964 | 0.338373176 |
| 204331_s_at | -0.25185571 | -2.92581651 | 0.004882057 | 0.019344701 |
| 204332_s_at | 0.070670394 | 0.968689333 | 0.336683713 | 0.519454197 |
| 204333_s_at | 0.063242003 | 0.611817012 | 0.543026723 | 0.707652728 |
| 204334_at   | 0.178770901 | 5.459483356 | 1.02E-06    | 1.62E-05    |
| 204335_at   | 0.142802443 | 3.100933981 | 0.002965335 | 0.012713618 |
| 204336_s_at | 0.099177227 | 2.070919697 | 0.042782536 | 0.112764631 |
| 204337_at   | -1.55778909 | -8.57800949 | 6.15E-12    | 4.50E-09    |
| 204338_s_at | -1.24288504 | -7.18018962 | 1.39E-09    | 1.16E-07    |
| 204339_s_at | -1.00760553 | -7.51124343 | 3.84E-10    | 4.87E-08    |
| 204340_at   | 0.13740628  | 2.90126576  | 0.005228361 | 0.020435608 |
| 204341_at   | -0.00989223 | -0.26558029 | 0.791495105 | 0.881231141 |
| 204342_at   | 0.131117328 | 3.056318551 | 0.003372367 | 0.014181205 |
| 204343_at   | 0.060118613 | 1.150462194 | 0.254629373 | 0.427879979 |
| 204344_s_at | -0.28641934 | -4.72999872 | 1.46E-05    | 0.000146195 |
| 204345_at   | 0.264242182 | 2.920314551 | 0.004957763 | 0.019589102 |
| 204346_s_at | 0.010597157 | 0.30310757  | 0.762881963 | 0.863660377 |
| 204347_at   | -0.0134914  | -0.37347788 | 0.710141336 | 0.829689888 |
| 204348_s_at | 0.147585183 | 2.280404049 | 0.02623993  | 0.076623359 |
| 204349_at   | 0.049828686 | 1.484174861 | 0.143124921 | 0.284454972 |
| 204350_s_at | -0.00556591 | -0.11010019 | 0.912706331 | 0.953763372 |
| 204351_at   | -0.01933137 | -0.56153202 | 0.57657747  | 0.733817405 |
| 204352_at   | -0.27696897 | -4.47185368 | 3.62E-05    | 0.000314755 |
| 204353_s_at | -0.0057731  | -0.10940514 | 0.913255166 | 0.953997126 |
| 204354_at   | 0.035985554 | 0.485998333 | 0.62878183  | 0.772996576 |
| 204355_at   | -0.25787761 | -4.68672672 | 1.70E-05    | 0.00016603  |
| 204356_at   | -0.03088501 | -0.66189026 | 0.510637581 | 0.681460024 |
| 204357_s_at | -0.08272156 | -2.13585405 | 0.036882788 | 0.100308257 |
| 204358_s_at | 0.214887511 | 1.944899562 | 0.056593547 | 0.140577968 |
| 204359_at   | 0.1518912   | 1.772269563 | 0.081551093 | 0.186438255 |
| 204360_s_at | 0.107505366 | 2.2056541   | 0.031345704 | 0.088184703 |
| 204361_s_at | -0.01900624 | -0.81670456 | 0.417407041 | 0.59977351  |
| 204362_at   | 0.047973079 | 0.730417578 | 0.468046853 | 0.64513786  |
| 204363_at   | 0.324529679 | 1.93838057  | 0.05740144  | 0.142079373 |
| 204364_s_at | -0.61272175 | -6.13164732 | 8.00E-08    | 2.12E-06    |
| 204365_s_at | -0.40514841 | -5.38517396 | 1.34E-06    | 2.03E-05    |
| 204366_s_at | 0.007969522 | 0.257997872 | 0.797313002 | 0.885062782 |
| 204367_at   | 0.02742526  | 0.42365969  | 0.673365948 | 0.803595697 |
| 204368_at   | 0.015415328 | 0.346474709 | 0.730227732 | 0.84270245  |
| 204369_at   | 0.034018843 | 0.524704148 | 0.601769434 | 0.752932223 |
| 204370_at   | 0.048498384 | 1.23611243  | 0.221351558 | 0.388356648 |
| 204371_s_at | -0.12610061 | -2.72068613 | 0.008563267 | 0.030761958 |
| 204372_s_at | 0.102397195 | 2.266761478 | 0.027112815 | 0.07852543  |

|             |             |             |             |             |
|-------------|-------------|-------------|-------------|-------------|
| 204373_s_at | 0.583130504 | 6.164401788 | 7.06E-08    | 1.93E-06    |
| 204374_s_at | 0.029911112 | 0.939056905 | 0.351558387 | 0.534796431 |
| 204375_at   | -0.38992545 | -6.47858724 | 2.11E-08    | 7.64E-07    |
| 204376_at   | 0.080220901 | 2.270991242 | 0.026839474 | 0.077907028 |
| 204377_s_at | 0.048862205 | 1.262698564 | 0.211702035 | 0.376692572 |
| 204378_at   | 0.492355076 | 4.357752535 | 5.37E-05    | 0.000438007 |
| 204379_s_at | 0.482292943 | 5.88903627  | 2.02E-07    | 4.36E-06    |
| 204380_s_at | -0.05807573 | -0.47751326 | 0.634773998 | 0.777340041 |
| 204381_at   | -0.41166612 | -5.41627186 | 1.19E-06    | 1.84E-05    |
| 204382_at   | -0.00638183 | -0.15163477 | 0.879996142 | 0.935642279 |
| 204383_at   | 0.048328155 | 1.093665026 | 0.278579869 | 0.455447342 |
| 204384_at   | 0.026558137 | 0.519984956 | 0.605034069 | 0.755206888 |
| 204385_at   | -0.00045404 | -0.01761284 | 0.986007583 | 0.993185578 |
| 204386_s_at | 0.037675    | 0.6511225   | 0.517514127 | 0.687128383 |
| 204387_x_at | 0.231558376 | 4.883232655 | 8.42E-06    | 9.26E-05    |
| 204388_s_at | -0.01319114 | -0.23584961 | 0.814372202 | 0.895965793 |
| 204389_at   | 0.044673915 | 0.966424151 | 0.337805906 | 0.520611799 |
| 204390_at   | 0.028427446 | 0.690624478 | 0.49252969  | 0.666428608 |
| 204391_x_at | -0.00700915 | -0.18375991 | 0.854836559 | 0.920658177 |
| 204392_at   | -0.4561511  | -5.11911293 | 3.58E-06    | 4.58E-05    |
| 204393_s_at | 0.026007606 | 0.949609854 | 0.346212822 | 0.529303876 |
| 204394_at   | -0.00284111 | -0.08756782 | 0.930518908 | 0.96375731  |
| 204395_s_at | -0.05850488 | -1.67131901 | 0.099994321 | 0.217625818 |
| 204396_s_at | -0.08294    | -1.61137513 | 0.11247477  | 0.237838771 |
| 204397_at   | 0.020635912 | 0.490797158 | 0.62540393  | 0.770467807 |
| 204398_s_at | 0.205830152 | 3.251857393 | 0.001904123 | 0.008752348 |
| 204399_s_at | 0.075942096 | 1.731848157 | 0.088565097 | 0.198540247 |
| 204400_at   | 0.483102093 | 4.097740893 | 0.000130055 | 0.000921433 |
| 204401_at   | -0.08226431 | -1.75221946 | 0.084970235 | 0.192385112 |
| 204402_at   | 0.121617122 | 3.082515891 | 0.003127455 | 0.01330277  |
| 204403_x_at | -0.01948099 | -0.46227559 | 0.645596522 | 0.785008836 |
| 204404_at   | -0.01815077 | -0.36343133 | 0.717591283 | 0.834649949 |
| 204405_x_at | -0.03610332 | -0.6952632  | 0.489639886 | 0.663905396 |
| 204406_at   | -0.0049008  | -0.18349818 | 0.855040962 | 0.92071826  |
| 204407_at   | 0.047632152 | 1.937178475 | 0.057551484 | 0.142348272 |
| 204408_at   | 0.041319339 | 1.101332143 | 0.275257891 | 0.451658614 |
| 204409_s_at | 0.108106754 | 1.201697688 | 0.234317504 | 0.403147056 |
| 204410_at   | -0.01433637 | -0.39720692 | 0.692658787 | 0.817607775 |
| 204411_at   | -0.11028981 | -2.25828945 | 0.027667726 | 0.079755289 |
| 204412_s_at | -0.41322138 | -4.70192421 | 1.61E-05    | 0.00015954  |
| 204413_at   | 0.008010504 | 0.181859412 | 0.85632104  | 0.92138209  |
| 204414_at   | -0.17179759 | -4.85463102 | 9.33E-06    | 0.000100967 |
| 204415_at   | 0.083912788 | 1.710338193 | 0.092496436 | 0.205172798 |
| 204416_x_at | -0.28344923 | -3.06069082 | 0.003330284 | 0.014031966 |
| 204417_at   | 0.326479851 | 3.521749252 | 0.000837803 | 0.004397308 |
| 204418_x_at | 0.003565183 | 0.046026658 | 0.963445588 | 0.981243759 |
| 204419_x_at | -0.09718746 | -1.11042622 | 0.271353728 | 0.447272287 |
| 204420_at   | -0.05327529 | -0.96540169 | 0.338313252 | 0.521078045 |
| 204421_s_at | 0.151056344 | 1.913754313 | 0.060542684 | 0.148107374 |
| 204422_s_at | 0.711462482 | 4.356647546 | 5.39E-05    | 0.000439437 |
| 204423_at   | 0.274537224 | 4.32444621  | 6.03E-05    | 0.000480906 |
| 204424_s_at | -0.59228567 | -6.46848205 | 2.19E-08    | 7.90E-07    |
| 204425_at   | 0.075530707 | 1.955148153 | 0.05534308  | 0.138162938 |
| 204426_at   | -0.21606344 | -3.18477486 | 0.002321913 | 0.010333449 |
| 204427_s_at | -0.20346971 | -2.86337836 | 0.005807692 | 0.022289169 |
| 204428_s_at | 0.411055075 | 6.896617341 | 4.18E-09    | 2.43E-07    |
| 204429_s_at | 0.040399917 | 0.39528251  | 0.694070521 | 0.818626615 |
| 204430_s_at | 0.247749399 | 2.612689266 | 0.01139664  | 0.038789021 |
| 204431_at   | 0.078154571 | 1.55330106  | 0.12573887  | 0.258797163 |
| 204432_at   | 0.123135179 | 3.275420912 | 0.001774982 | 0.008252105 |
| 204433_s_at | 0.020740527 | 0.535453823 | 0.594363635 | 0.747495218 |
| 204434_at   | -0.15839735 | -3.33872136 | 0.00146774  | 0.007038224 |
| 204435_at   | -0.0391816  | -0.78922438 | 0.433164375 | 0.614024348 |
| 204436_at   | 0.30853022  | 6.550168399 | 1.60E-08    | 6.31E-07    |
| 204437_s_at | 0.11441888  | 1.504134876 | 0.137920613 | 0.276956688 |
| 204438_at   | -0.03476727 | -0.40632486 | 0.685984861 | 0.812462747 |
| 204439_at   | 0.211015807 | 1.800087535 | 0.076997641 | 0.178216302 |
| 204440_at   | -0.01895051 | -0.45964374 | 0.647473692 | 0.78614893  |
| 204441_s_at | 0.102222978 | 2.328710053 | 0.023346154 | 0.069829093 |
| 204442_x_at | 0.120816455 | 2.11589517  | 0.03861565  | 0.103926931 |
| 204443_at   | 0.05444252  | 1.158224737 | 0.25147366  | 0.424428278 |
| 204444_at   | -0.03349628 | -1.33013622 | 0.188630156 | 0.346854206 |
| 204445_s_at | -0.00863105 | -0.18310657 | 0.855346827 | 0.92082627  |
| 204446_s_at | 0.306805416 | 3.019197953 | 0.003750188 | 0.015529656 |
| 204447_at   | -0.58049997 | -7.11821063 | 1.77E-09    | 1.34E-07    |

|             |             |             |             |             |
|-------------|-------------|-------------|-------------|-------------|
| 204448_s_at | 0.03703279  | 1.073168245 | 0.287597647 | 0.465784165 |
| 204449_at   | 0.104306525 | 3.67061838  | 0.000524818 | 0.002984875 |
| 204450_x_at | 0.059253206 | 1.034401384 | 0.305201018 | 0.485203611 |
| 204451_at   | 0.024545478 | 0.670175567 | 0.505379924 | 0.677092138 |
| 204452_s_at | -0.0747151  | -1.58736673 | 0.117814398 | 0.246309635 |
| 204453_at   | 0.090576274 | 3.388786025 | 0.001261091 | 0.006188043 |
| 204454_at   | -0.42414241 | -7.38006625 | 6.39E-10    | 6.88E-08    |
| 204455_at   | 0.072683883 | 1.170698557 | 0.246461462 | 0.418052818 |
| 204456_s_at | 0.0074201   | 0.296654958 | 0.767779471 | 0.866986713 |
| 204457_s_at | 0.235887194 | 4.204760213 | 9.07E-05    | 0.00067868  |
| 204458_at   | 0.030710986 | 0.73433751  | 0.465673063 | 0.643275414 |
| 204459_at   | 0.013872533 | 0.513889381 | 0.609262867 | 0.758508784 |
| 204460_s_at | -0.17773585 | -5.17194775 | 2.95E-06    | 3.89E-05    |
| 204461_x_at | 0.10076369  | 1.743232773 | 0.08654089  | 0.195081482 |
| 204462_s_at | -0.08690912 | -2.36319431 | 0.021457791 | 0.06521534  |
| 204463_s_at | 0.085592923 | 3.344543258 | 0.00144216  | 0.006936398 |
| 204464_s_at | 0.134248095 | 2.316751162 | 0.024034783 | 0.071147586 |
| 204465_s_at | -0.88424225 | -6.46069175 | 2.26E-08    | 8.09E-07    |
| 204466_s_at | -0.63654383 | -5.21694036 | 2.50E-06    | 3.40E-05    |
| 204467_s_at | -0.4125849  | -6.66131523 | 1.04E-08    | 4.61E-07    |
| 204468_s_at | 0.340917213 | 3.887700692 | 0.000260707 | 0.00165106  |
| 204469_at   | 0.354169422 | 3.798659638 | 0.000348214 | 0.002108152 |
| 204470_at   | 0.164944103 | 2.567763579 | 0.012808805 | 0.042675647 |
| 204471_at   | -1.16040647 | -5.14507316 | 3.25E-06    | 4.22E-05    |
| 204472_at   | 0.475656071 | 3.157450618 | 0.002515616 | 0.011057032 |
| 204473_s_at | 0.045919542 | 1.311118249 | 0.194935312 | 0.355115516 |
| 204474_at   | -0.01290204 | -0.38688667 | 0.700242353 | 0.822865777 |
| 204475_at   | 0.017533228 | 1.059139064 | 0.293885206 | 0.472501117 |
| 204476_s_at | 0.070117131 | 1.613934926 | 0.111917186 | 0.236951199 |
| 204477_at   | -0.06265359 | -1.7919031  | 0.078314726 | 0.180572757 |
| 204478_s_at | -0.21155482 | -4.47522762 | 3.58E-05    | 0.000311684 |
| 204479_at   | -0.0926786  | -1.68430687 | 0.097445205 | 0.213355923 |
| 204480_s_at | -0.44254995 | -6.02687504 | 1.19E-07    | 2.90E-06    |
| 204481_at   | -0.00076503 | -0.01632044 | 0.987034225 | 0.993692185 |
| 204482_at   | 0.356967726 | 3.954231594 | 0.00020956  | 0.00137065  |
| 204483_at   | 0.079786337 | 2.353423418 | 0.021978494 | 0.06651118  |
| 204484_at   | 0.064724376 | 1.101392009 | 0.275232062 | 0.451632814 |
| 204485_s_at | 0.031037386 | 0.679031131 | 0.499792888 | 0.672527993 |
| 204486_at   | 0.0183528   | 0.57371885  | 0.56835483  | 0.727682014 |
| 204487_s_at | 0.046992995 | 1.534461971 | 0.130300941 | 0.2656665   |
| 204488_at   | -0.00982351 | -0.31271889 | 0.755605083 | 0.859580491 |
| 204489_s_at | 0.602107121 | 4.315826378 | 6.21E-05    | 0.000492969 |
| 204490_s_at | 0.446650112 | 4.62621456  | 2.11E-05    | 0.000199787 |
| 204491_at   | 0.009546369 | 0.19452887  | 0.846435011 | 0.915598643 |
| 204492_at   | 0.040891212 | 1.934390254 | 0.057900794 | 0.142990677 |
| 204493_at   | -0.09063283 | -2.63845835 | 0.010652095 | 0.036681164 |
| 204494_s_at | -0.00584754 | -0.14419838 | 0.885838879 | 0.938831297 |
| 204495_s_at | 0.031086187 | 0.998809618 | 0.321995911 | 0.503944574 |
| 204496_at   | 0.113830027 | 1.798261895 | 0.077289818 | 0.178710821 |
| 204497_at   | -0.53862664 | -5.79424326 | 2.89E-07    | 5.79E-06    |
| 204498_s_at | -0.05989385 | -1.02210951 | 0.310932612 | 0.491726832 |
| 204499_at   | -0.0287316  | -0.66081957 | 0.511319149 | 0.682084452 |
| 204500_s_at | 0.182825086 | 2.180849042 | 0.033223522 | 0.092397365 |
| 204501_at   | -0.08438548 | -1.86838241 | 0.066713329 | 0.159776542 |
| 204502_at   | 0.044865735 | 0.784234051 | 0.436063293 | 0.616633275 |
| 204503_at   | 0.008792389 | 0.182938494 | 0.855478103 | 0.920856171 |
| 204504_s_at | 0.134260702 | 4.148481445 | 0.000109661 | 0.000795852 |
| 204505_s_at | -0.77221327 | -8.39648592 | 1.24E-11    | 6.15E-09    |
| 204506_at   | -0.72033959 | -7.17764661 | 1.40E-09    | 1.16E-07    |
| 204507_s_at | -0.93106057 | -7.51397974 | 3.80E-10    | 4.86E-08    |
| 204508_s_at | -1.09363466 | -8.14945097 | 3.22E-11    | 1.14E-08    |
| 204509_at   | -0.103438   | -1.84866641 | 0.069555905 | 0.164973334 |
| 204510_at   | -0.14716181 | -2.42700446 | 0.018320032 | 0.057380255 |
| 204511_at   | -0.02588058 | -0.57576081 | 0.566982732 | 0.726854233 |
| 204512_at   | 0.106644225 | 2.423943501 | 0.018460592 | 0.057735532 |
| 204513_s_at | -0.39356391 | -4.91173784 | 7.60E-06    | 8.50E-05    |
| 204514_at   | -0.06296618 | -1.97275079 | 0.053250427 | 0.133986492 |
| 204515_at   | -0.04364751 | -1.30578903 | 0.196730281 | 0.357569227 |
| 204516_at   | 0.039485581 | 0.736960603 | 0.464088438 | 0.641819546 |
| 204517_at   | 0.186405283 | 3.364377567 | 0.001358139 | 0.006589008 |
| 204518_s_at | 0.129474148 | 3.227469723 | 0.002047069 | 0.009286195 |
| 204519_s_at | 0.241108268 | 1.935153872 | 0.057804948 | 0.142840802 |
| 204520_x_at | 0.154643844 | 4.358652658 | 5.36E-05    | 0.00043689  |
| 204521_at   | -0.51921644 | -5.83370041 | 2.49E-07    | 5.14E-06    |
| 204522_at   | -0.07061288 | -1.85874618 | 0.068090147 | 0.162315171 |

|             |             |             |             |             |
|-------------|-------------|-------------|-------------|-------------|
| 204523_at   | 0.001766026 | 0.0546668   | 0.956589979 | 0.977772055 |
| 204524_at   | -0.42794966 | -5.26509212 | 2.09E-06    | 2.94E-05    |
| 204525_at   | -0.08088378 | -2.87003665 | 0.005701762 | 0.021952372 |
| 204526_s_at | 0.011948757 | 0.23254876  | 0.816922577 | 0.897777161 |
| 204527_at   | 0.32923203  | -5.35638297 | 1.49E-06    | 2.22E-05    |
| 204528_s_at | 0.122599988 | 2.564712303 | 0.01291025  | 0.042959191 |
| 204529_s_at | 0.224462154 | 3.194332806 | 0.002257529 | 0.010098438 |
| 204530_s_at | 0.065292302 | 2.519144185 | 0.014514461 | 0.047269567 |
| 204531_s_at | 0.075753083 | 2.270876973 | 0.026846826 | 0.07791664  |
| 204532_x_at | 0.017711756 | 0.460429616 | 0.646912923 | 0.785797091 |
| 204533_at   | 0.125436206 | 1.258916835 | 0.213055284 | 0.378362344 |
| 204534_at   | 0.000553553 | 0.014876106 | 0.988181584 | 0.994546037 |
| 204535_s_at | -0.04329201 | -0.81211691 | 0.420013279 | 0.602214641 |
| 204536_s_at | 0.067968116 | 2.36074537  | 0.021587253 | 0.065528594 |
| 204537_s_at | 0.05982279  | 1.227728871 | 0.224460473 | 0.391583637 |
| 204538_x_at | 0.126505014 | 2.565676948 | 0.0128781   | 0.042868171 |
| 204539_s_at | 0.035678747 | 1.28525884  | 0.203761289 | 0.366703882 |
| 204540_at   | -1.01099892 | -6.17729646 | 6.72E-08    | 1.85E-06    |
| 204541_at   | 0.251742953 | 3.859901794 | 0.000285463 | 0.001786197 |
| 204542_at   | 0.148253202 | 2.100836921 | 0.039969595 | 0.106785625 |
| 204543_at   | -0.10620355 | -2.91330431 | 0.0050558   | 0.019900811 |
| 204544_at   | 0.265017451 | 4.384010952 | 4.91E-05    | 0.000405177 |
| 204545_at   | 0.201459778 | 2.258384838 | 0.027661422 | 0.079742261 |
| 204546_at   | -0.61125396 | -5.83264471 | 2.50E-07    | 5.16E-06    |
| 204547_at   | -0.57878454 | -5.63014877 | 5.37E-07    | 9.59E-06    |
| 204548_at   | -0.21546488 | -4.18065598 | 9.84E-05    | 0.000726917 |
| 204549_at   | -0.05933415 | -1.62890365 | 0.108701272 | 0.231866993 |
| 204550_x_at | 0.050289919 | 0.574188256 | 0.568039268 | 0.727445574 |
| 204551_s_at | -0.01521829 | -0.29466257 | 0.769293622 | 0.867906071 |
| 204552_at   | -0.71140247 | -6.1935836  | 6.31E-08    | 1.76E-06    |
| 204553_x_at | -0.31867298 | -7.00770803 | 2.72E-09    | 1.79E-07    |
| 204554_at   | 0.115809156 | 2.494812576 | 0.01544298  | 0.049846536 |
| 204555_s_at | 0.236088823 | 4.919269929 | 7.40E-06    | 8.34E-05    |
| 204556_s_at | -0.11555894 | -2.29511295 | 0.025326812 | 0.074457694 |
| 204557_s_at | -0.17055421 | -1.70809567 | 0.092914449 | 0.205897093 |
| 204558_at   | 0.002967421 | 0.059069055 | 0.953098199 | 0.975875063 |
| 204559_s_at | -0.17332868 | -2.37289089 | 0.020951968 | 0.063952011 |
| 204560_at   | 0.281184268 | 2.68337674  | 0.009459547 | 0.03335959  |
| 204561_x_at | -0.00071799 | -0.01141598 | 0.99093036  | 0.995742865 |
| 204562_at   | 0.044605813 | 1.030042907 | 0.307225057 | 0.487467684 |
| 204563_at   | 0.217149316 | 3.428275055 | 0.001117858 | 0.005588914 |
| 204564_at   | -0.09933948 | -2.56063365 | 0.01304699  | 0.043323879 |
| 204565_at   | -0.1348335  | -2.53160637 | 0.014058711 | 0.046040295 |
| 204566_at   | 0.117450168 | 2.17436451  | 0.033730419 | 0.093521924 |
| 204567_s_at | 0.025288839 | 0.253549739 | 0.800731406 | 0.887367408 |
| 204568_at   | 0.205527154 | 2.874805314 | 0.005626996 | 0.021711323 |
| 204569_at   | 0.060781205 | 2.634271974 | 0.010769952 | 0.037010167 |
| 204570_at   | 0.147257068 | 1.576822856 | 0.120223034 | 0.249872474 |
| 204571_x_at | -0.00801356 | -0.17966421 | 0.858036362 | 0.922521197 |
| 204572_s_at | 0.004544397 | 0.129851114 | 0.89712918  | 0.944848596 |
| 204573_at   | 0.103840427 | 4.213972477 | 8.79E-05    | 0.000660115 |
| 204574_s_at | -0.01795467 | -0.39206443 | 0.696433722 | 0.82033145  |
| 204575_s_at | -0.02922323 | -0.74113176 | 0.461574969 | 0.639768904 |
| 204576_s_at | -0.04558738 | -1.08834692 | 0.280900449 | 0.458062705 |
| 204577_s_at | 0.122594902 | 2.908591239 | 0.005122719 | 0.020104017 |
| 204578_at   | -0.1860863  | -4.05622253 | 0.000149425 | 0.001030568 |
| 204579_at   | 0.062849262 | 1.993032303 | 0.050923711 | 0.129318853 |
| 204580_at   | -0.02086258 | -0.55944763 | 0.577989579 | 0.734956334 |
| 204581_at   | 0.341428261 | 4.403318964 | 4.59E-05    | 0.000383259 |
| 204582_s_at | -0.00098819 | -0.03486357 | 0.972307087 | 0.985963023 |
| 204583_x_at | -0.01337365 | -0.36130906 | 0.719168597 | 0.835658128 |
| 204584_at   | -0.74271701 | -6.72183132 | 8.24E-09    | 3.88E-07    |
| 204585_s_at | -0.22343645 | -4.44833427 | 3.93E-05    | 0.000337242 |
| 204586_at   | -0.76424434 | -6.93754769 | 3.57E-09    | 2.18E-07    |
| 204587_at   | -0.3583877  | -6.53006389 | 1.73E-08    | 6.64E-07    |
| 204588_s_at | 0.096092662 | 2.021542747 | 0.047800961 | 0.12311087  |
| 204589_at   | 0.215964978 | 3.18077705  | 0.002349352 | 0.010430878 |
| 204590_x_at | -0.08798482 | -3.17649605 | 0.002379071 | 0.010546066 |
| 204591_at   | -0.46497133 | -3.46765961 | 0.000990461 | 0.005055467 |
| 204592_at   | -0.5993004  | -6.58149013 | 1.42E-08    | 5.79E-07    |
| 204593_s_at | -0.04920481 | -1.24744513 | 0.217199479 | 0.383391095 |
| 204594_s_at | -0.01373843 | -0.36717493 | 0.714811976 | 0.83271757  |
| 204595_s_at | -0.04420345 | -0.87980234 | 0.382562259 | 0.565243074 |
| 204596_s_at | -0.06459611 | -1.41806919 | 0.161469695 | 0.310308765 |
| 204597_x_at | -0.03541931 | -0.43464625 | 0.665416541 | 0.798421243 |

|             |             |             |             |             |
|-------------|-------------|-------------|-------------|-------------|
| 204598_at   | 0.067753845 | 1.647886643 | 0.10473121  | 0.225486426 |
| 204599_s_at | -0.1087536  | -2.16674268 | 0.034334881 | 0.094838968 |
| 204600_at   | 0.026453467 | 0.723178063 | 0.472448904 | 0.648677098 |
| 204601_at   | 0.023174549 | 0.833280078 | 0.408072303 | 0.590250739 |
| 204602_at   | 0.069483689 | 1.670947894 | 0.100067954 | 0.217722458 |
| 204603_at   | -0.00886888 | -0.15910308 | 0.874135062 | 0.932239193 |
| 204604_at   | -0.30871686 | -5.02100621 | 5.12E-06    | 6.13E-05    |
| 204605_at   | -0.07980782 | -1.29289634 | 0.201124052 | 0.363250602 |
| 204606_at   | -0.017368   | -0.36345424 | 0.717574265 | 0.834649949 |
| 204607_at   | -0.02319779 | -0.49772386 | 0.620542425 | 0.767135714 |
| 204608_at   | 0.057712355 | 1.189628017 | 0.238993117 | 0.408709652 |
| 204609_at   | -0.04037513 | -1.24234333 | 0.219061513 | 0.385839723 |
| 204610_s_at | -0.51662384 | -6.79609362 | 6.18E-09    | 3.20E-07    |
| 204611_s_at | -0.23268184 | -4.4970295  | 3.32E-05    | 0.000291765 |
| 204612_at   | -0.30881846 | -4.13556027 | 0.000114539 | 0.000826577 |
| 204613_at   | 0.016155913 | 0.261134785 | 0.794904665 | 0.883398714 |
| 204614_at   | -0.02583689 | -0.61980925 | 0.53778746  | 0.703821404 |
| 204615_x_at | -0.05219226 | -0.65455477 | 0.515316874 | 0.685576603 |
| 204616_at   | -0.72791158 | -7.05474192 | 2.26E-09    | 1.59E-07    |
| 204617_s_at | 0.067434744 | 2.020447636 | 0.047917788 | 0.123353597 |
| 204618_s_at | 0.115515731 | 3.538900975 | 0.000794264 | 0.004205833 |
| 204619_s_at | 0.783866836 | 7.545722825 | 3.35E-10    | 4.60E-08    |
| 204620_s_at | 1.067982968 | 9.092201757 | 8.57E-13    | 2.55E-09    |
| 204621_s_at | 0.136357939 | 1.392446407 | 0.169051677 | 0.32118597  |
| 204622_x_at | 0.15711166  | 1.827591936 | 0.072706448 | 0.170485416 |
| 204623_at   | 0.041320339 | 1.326828628 | 0.189715522 | 0.348404262 |
| 204624_at   | 0.00910615  | 0.266553565 | 0.790749178 | 0.880773659 |
| 204625_s_at | 0.018165435 | 0.422336186 | 0.674326133 | 0.804253403 |
| 204626_s_at | 0.038958607 | 0.982982739 | 0.329659414 | 0.512100749 |
| 204627_s_at | -0.00064119 | -0.02087636 | 0.983415248 | 0.991915734 |
| 204628_s_at | -0.04256786 | -1.0346429  | 0.305089126 | 0.485060236 |
| 204629_at   | -0.03926582 | -0.89730247 | 0.373231416 | 0.556293428 |
| 204630_s_at | 0.171805901 | 3.767330538 | 0.000385234 | 0.002297117 |
| 204631_at   | -0.00139923 | -0.04734601 | 0.96239854  | 0.980900717 |
| 204632_at   | -0.13910641 | -3.40563302 | 0.001197979 | 0.005927818 |
| 204633_s_at | -0.22690117 | -3.69417323 | 0.000486931 | 0.002802026 |
| 204634_at   | 0.312567301 | 3.41909495  | 0.00114971  | 0.005720646 |
| 204635_at   | -0.23808404 | -3.82120009 | 0.000323716 | 0.001984026 |
| 204636_at   | -0.09213135 | -2.3896609  | 0.020102268 | 0.061836789 |
| 204637_at   | 0.079177659 | 1.435660273 | 0.156418715 | 0.303117464 |
| 204638_at   | 0.048403518 | 1.218920048 | 0.22776145  | 0.395274726 |
| 204639_at   | 0.070843785 | 1.557499649 | 0.124739738 | 0.257150005 |
| 204640_s_at | 0.283550895 | 5.942334609 | 1.65E-07    | 3.72E-06    |
| 204641_at   | 0.007788502 | 0.329188569 | 0.743187516 | 0.85115282  |
| 204642_at   | 0.064880979 | 1.149364001 | 0.255078094 | 0.428344111 |
| 204643_s_at | 0.093847605 | 2.90438911  | 0.005183074 | 0.020294547 |
| 204644_at   | -0.03131923 | -0.85462196 | 0.39624295  | 0.578892156 |
| 204645_at   | 0.058934455 | 1.017178509 | 0.313252242 | 0.494293302 |
| 204646_at   | 0.346778233 | 3.640611034 | 0.000577175 | 0.003235305 |
| 204647_at   | 0.526047994 | 6.881783398 | 4.43E-09    | 2.55E-07    |
| 204648_at   | 0.006570474 | 0.108831818 | 0.913707913 | 0.954234837 |
| 204649_at   | -0.02792166 | -0.60868098 | 0.54508963  | 0.70931886  |
| 204650_s_at | -0.00616191 | -0.1877195  | 0.851745416 | 0.918586056 |
| 204651_at   | 0.173699522 | 4.43431021  | 4.12E-05    | 0.000350654 |
| 204652_s_at | 0.069672884 | 1.837218685 | 0.071252726 | 0.16792843  |
| 204653_at   | 0.035391384 | 0.775891875 | 0.44093486  | 0.621295819 |
| 204654_s_at | -0.05217979 | -1.68337646 | 0.097626026 | 0.213680243 |
| 204655_at   | 0.11876123  | 2.961768572 | 0.004413178 | 0.017797669 |
| 204656_at   | -0.03097553 | -0.84749025 | 0.400172076 | 0.582613625 |
| 204657_s_at | -0.05072141 | -1.51130601 | 0.136087785 | 0.274254084 |
| 204658_at   | 0.043723897 | 0.802401834 | 0.425564682 | 0.60702594  |
| 204659_s_at | 0.031800694 | 0.859395146 | 0.393626613 | 0.576355136 |
| 204660_at   | -0.08402757 | -1.81714306 | 0.074312418 | 0.173411163 |
| 204661_at   | -0.12994625 | -2.45715598 | 0.016985983 | 0.053917316 |
| 204662_at   | 0.430384975 | 6.160917083 | 7.15E-08    | 1.94E-06    |
| 204663_at   | -0.74998612 | -8.40256011 | 1.21E-11    | 6.07E-09    |
| 204664_at   | -0.00625099 | -0.12377396 | 0.901918067 | 0.947912753 |
| 204665_at   | 0.018377659 | 0.516569591 | 0.607401813 | 0.757062828 |
| 204666_s_at | 6.73E-05    | 0.00358665  | 0.997150463 | 0.998640408 |
| 204667_at   | 0.071298535 | 2.177118629 | 0.033514306 | 0.093009276 |
| 204668_at   | 0.030640704 | 0.669314434 | 0.505925013 | 0.677533796 |
| 204669_s_at | 0.122557971 | 2.565836557 | 0.012872788 | 0.042856871 |
| 204670_x_at | 0.329365752 | 3.196943916 | 0.002240234 | 0.010033125 |
| 204671_s_at | 0.125739201 | 2.393715489 | 0.019901517 | 0.061344825 |
| 204672_s_at | 0.134057722 | 1.868696897 | 0.066668794 | 0.159702082 |



|             |             |             |             |             |
|-------------|-------------|-------------|-------------|-------------|
| 204673_at   | 0.014648205 | 0.371965483 | 0.711261046 | 0.830362271 |
| 204674_at   | 0.076302714 | 2.059560696 | 0.04389468  | 0.115200013 |
| 204675_at   | -0.56034389 | -6.5850011  | 1.40E-08    | 5.73E-07    |
| 204676_at   | 0.027535679 | 0.809616544 | 0.421437855 | 0.60337329  |
| 204677_at   | 0.191701112 | 2.114784489 | 0.038714132 | 0.104129272 |
| 204678_s_at | -0.73270675 | -6.77482168 | 6.71E-09    | 3.38E-07    |
| 204679_at   | -0.56739799 | -6.12594192 | 8.18E-08    | 2.15E-06    |
| 204680_s_at | 0.144714177 | 1.547420129 | 0.127149089 | 0.260917564 |
| 204681_s_at | 0.018252297 | 0.17666096  | 0.860384207 | 0.923911939 |
| 204682_at   | 0.08796347  | 1.554697811 | 0.12540578  | 0.258218618 |
| 204683_at   | 0.070008764 | 1.247939043 | 0.217019834 | 0.383149657 |
| 204684_at   | -0.84535267 | -6.85192304 | 4.98E-09    | 2.77E-07    |
| 204685_s_at | -0.74875337 | -7.32632434 | 7.88E-10    | 8.05E-08    |
| 204686_at   | -0.08272053 | -1.97035282 | 0.053531455 | 0.134519339 |
| 204687_at   | -0.05442416 | -1.33446914 | 0.187215448 | 0.345203103 |
| 204688_at   | -0.0157743  | -0.19678287 | 0.844678755 | 0.914584332 |
| 204689_at   | 0.04405304  | 1.379075088 | 0.173115674 | 0.326671055 |
| 204690_at   | 0.148638608 | 2.660759763 | 0.010043847 | 0.035026156 |
| 204691_x_at | 0.053937035 | 1.565955179 | 0.122746864 | 0.253937086 |
| 204692_at   | 0.124599973 | 2.77576367  | 0.007381805 | 0.027198317 |
| 204693_at   | 0.160398799 | 2.298577888 | 0.025115859 | 0.073985524 |
| 204694_at   | 0.047042755 | 1.656107235 | 0.103049004 | 0.222658387 |
| 204695_at   | -0.09840236 | -1.85385317 | 0.068798382 | 0.163541157 |
| 204696_s_at | -0.00110491 | -0.02055105 | 0.983673645 | 0.99200796  |
| 204697_s_at | -0.21576411 | -2.93716797 | 0.004729241 | 0.018841078 |
| 204698_at   | 0.119452751 | 2.058922916 | 0.04395786  | 0.115304887 |
| 204699_s_at | 0.003326716 | 0.076519002 | 0.939267    | 0.968323538 |
| 204700_x_at | -0.02953799 | -0.79075295 | 0.43227871  | 0.613139106 |
| 204701_s_at | -0.15625141 | -3.76666766 | 0.000386057 | 0.002301101 |
| 204702_s_at | 0.019722897 | 1.085741258 | 0.282042345 | 0.459350478 |
| 204703_at   | 0.194392445 | 3.267569408 | 0.001817066 | 0.008417988 |
| 204704_s_at | -0.03158416 | -2.21480186 | 0.030677134 | 0.086631016 |
| 204705_x_at | 0.029539676 | 0.734663321 | 0.465476071 | 0.643181319 |
| 204706_at   | 0.061984748 | 1.638322588 | 0.106716406 | 0.228527534 |
| 204707_s_at | -0.18809654 | -3.31854166 | 0.001559765 | 0.007401681 |
| 204708_at   | -0.00395288 | -0.09848766 | 0.921881387 | 0.95910701  |
| 204709_s_at | -0.01934336 | -1.02553844 | 0.309326453 | 0.489915471 |
| 204710_s_at | 0.008730399 | 0.259432522 | 0.796211315 | 0.884279121 |
| 204711_at   | -0.10956563 | -2.69969364 | 0.009057499 | 0.032216295 |
| 204712_at   | -0.54947893 | -2.54773852 | 0.013487996 | 0.044530216 |
| 204713_s_at | 0.176883389 | 2.654839045 | 0.010202157 | 0.035435985 |
| 204714_s_at | 0.271684101 | 3.952030179 | 0.000211086 | 0.001378612 |
| 204715_at   | -0.07656338 | -1.42457796 | 0.15958628  | 0.30778516  |
| 204716_at   | -0.28180553 | -3.53267432 | 0.000809815 | 0.004273497 |
| 204717_s_at | 0.024828789 | 0.699705562 | 0.486881205 | 0.661368797 |
| 204718_at   | -0.97041122 | -8.03529538 | 5.01E-11    | 1.42E-08    |
| 204719_at   | 0.364794548 | 1.97983306  | 0.052427793 | 0.132401138 |
| 204720_s_at | -0.33774606 | -2.70424831 | 0.008948099 | 0.031872835 |
| 204721_s_at | -0.03444724 | -1.47475587 | 0.145633893 | 0.28804939  |
| 204722_at   | -0.80519077 | -6.92842311 | 3.70E-09    | 2.24E-07    |
| 204723_at   | -1.00916968 | -7.23134472 | 1.14E-09    | 1.02E-07    |
| 204724_s_at | 0.03688721  | 0.337586998 | 0.736881443 | 0.847114098 |
| 204725_s_at | -0.01166406 | -0.21583603 | 0.829865518 | 0.905605272 |
| 204726_at   | -0.03372794 | -0.88705365 | 0.378678293 | 0.561285827 |
| 204727_at   | -0.06965926 | -2.96521773 | 0.004370468 | 0.017650907 |
| 204728_s_at | -0.00114167 | -0.04424177 | 0.964862186 | 0.982023202 |
| 204729_s_at | -0.13602351 | -3.28624627 | 0.001718462 | 0.008029432 |
| 204730_at   | -0.64462926 | -5.61547249 | 5.67E-07    | 1.00E-05    |
| 204731_at   | 0.5044423   | 5.778052785 | 3.07E-07    | 6.09E-06    |
| 204732_s_at | -0.09525004 | -1.89300891 | 0.063301182 | 0.153369642 |
| 204733_at   | 0.253517195 | 1.806119836 | 0.076038786 | 0.176435566 |
| 204734_at   | 0.047929493 | 1.630095945 | 0.108448373 | 0.23146011  |
| 204735_at   | -0.3069245  | -4.08199038 | 0.000137099 | 0.000961433 |
| 204736_s_at | 0.0661013   | 2.09750602  | 0.040274609 | 0.107440626 |
| 204737_s_at | -0.10971738 | -3.00945727 | 0.003855673 | 0.015900872 |
| 204738_s_at | 0.031667761 | 0.711658264 | 0.479501598 | 0.654927583 |
| 204739_at   | 0.052989109 | 1.745176052 | 0.086199229 | 0.194520477 |
| 204740_at   | 0.059508348 | 1.686567493 | 0.097007004 | 0.212684077 |
| 204741_at   | 0.028194669 | 0.764227633 | 0.447799776 | 0.627388558 |
| 204742_s_at | -0.26984599 | -4.2033394  | 9.11E-05    | 0.000681387 |
| 204743_at   | -0.84858437 | -6.5489228  | 1.61E-08    | 6.33E-07    |
| 204744_s_at | -0.34929047 | -4.79871627 | 1.14E-05    | 0.000118984 |
| 204745_x_at | 0.797745552 | 5.745697691 | 3.47E-07    | 6.74E-06    |
| 204746_s_at | 0.090702808 | 2.015025202 | 0.048499891 | 0.124486397 |
| 204747_at   | 0.087911666 | 1.471838397 | 0.146417998 | 0.289071572 |

|             |             |             |             |             |
|-------------|-------------|-------------|-------------|-------------|
| 204748_at   | 0.040028971 | 1.213639044 | 0.229757368 | 0.397638334 |
| 204749_at   | -0.42334554 | -3.76067264 | 0.000393574 | 0.002339042 |
| 204750_s_at | 0.041294463 | 1.623220405 | 0.109913331 | 0.233794042 |
| 204751_x_at | -0.02018423 | -0.8615477  | 0.392450249 | 0.575231594 |
| 204752_x_at | -0.15434391 | -3.01957129 | 0.003746199 | 0.015515255 |
| 204753_s_at | -1.01248215 | -7.27593553 | 9.58E-10    | 9.15E-08    |
| 204754_at   | -0.62393317 | -6.76292601 | 7.03E-09    | 3.49E-07    |
| 204755_x_at | -0.63242639 | -5.93663913 | 1.68E-07    | 3.78E-06    |
| 204756_at   | -0.05720303 | -1.4236569  | 0.159851764 | 0.308187525 |
| 204757_s_at | -0.46775969 | -6.94352429 | 3.49E-09    | 2.15E-07    |
| 204758_s_at | -0.04861974 | -1.4089939  | 0.164124454 | 0.314256035 |
| 204759_at   | 0.28934568  | 3.73670686  | 0.000425048 | 0.00249491  |
| 204760_s_at | 0.037458923 | 0.947958349 | 0.347045864 | 0.530044897 |
| 204761_at   | 0.033323526 | 1.544614874 | 0.127826209 | 0.261863262 |
| 204762_s_at | -0.92240686 | -8.19833243 | 2.66E-11    | 1.02E-08    |
| 204763_s_at | -0.4597886  | -6.26673698 | 4.77E-08    | 1.41E-06    |
| 204764_at   | -0.0332906  | -0.58317987 | 0.562011248 | 0.723149528 |
| 204765_at   | 0.079324391 | 2.18337295  | 0.033028043 | 0.091991106 |
| 204766_s_at | -0.21473454 | -3.97212245 | 0.000197547 | 0.001303718 |
| 204767_s_at | -0.00222087 | -0.03471089 | 0.972428313 | 0.986018835 |
| 204768_s_at | -0.10240187 | -1.64093863 | 0.106170383 | 0.227762048 |
| 204769_s_at | 0.083755541 | 1.787193671 | 0.079081084 | 0.181973629 |
| 204770_at   | -0.02604472 | -0.46665998 | 0.642474486 | 0.782781802 |
| 204771_s_at | 0.245573535 | 3.59500499  | 0.000666401 | 0.003644938 |
| 204772_s_at | -0.05629384 | -1.53813709 | 0.129400777 | 0.264277272 |
| 204773_at   | 0.080561305 | 1.730729838 | 0.088766031 | 0.198813844 |
| 204774_at   | 0.114045824 | 0.732695422 | 0.466666625 | 0.644149262 |
| 204775_at   | -0.07400947 | -2.16813111 | 0.034224067 | 0.094585492 |
| 204776_at   | 0.103296564 | 1.759726095 | 0.083676451 | 0.189994816 |
| 204777_s_at | 0.269018503 | 2.53537242  | 0.013923555 | 0.045671305 |
| 204778_x_at | 0.02800162  | 0.811695518 | 0.420253162 | 0.602275271 |
| 204779_s_at | -0.00625027 | -0.18264804 | 0.855704976 | 0.920949602 |
| 204780_s_at | 0.1671104   | 2.658212841 | 0.01011167  | 0.035201026 |
| 204781_s_at | 0.110427368 | 1.922831264 | 0.059368251 | 0.14579413  |
| 204782_at   | -0.1005927  | -2.34777081 | 0.02228485  | 0.067214965 |
| 204783_at   | -0.07914884 | -0.65347563 | 0.516007174 | 0.686084458 |
| 204784_s_at | -0.07001377 | -0.66810101 | 0.50669364  | 0.678216663 |
| 204785_x_at | -0.02842853 | -0.74806844 | 0.457412367 | 0.636129995 |
| 204786_s_at | 0.139762846 | 2.25860374  | 0.027646962 | 0.079721144 |
| 204787_at   | 0.455764017 | 3.031601101 | 0.003619762 | 0.015054384 |
| 204788_s_at | 0.074461062 | 1.842509442 | 0.070464234 | 0.166473908 |
| 204789_at   | -0.12392905 | -3.20011086 | 0.002219425 | 0.009951894 |
| 204790_at   | 0.056419983 | 0.837789439 | 0.405555031 | 0.587899508 |
| 204791_at   | 0.169486444 | 2.303204883 | 0.02483659  | 0.073336157 |
| 204792_s_at | 0.216791103 | 3.764692171 | 0.000388519 | 0.002313922 |
| 204793_at   | -0.50990742 | -4.9050022  | 7.79E-06    | 8.67E-05    |
| 204794_at   | -0.20705824 | -4.44460378 | 3.98E-05    | 0.000340817 |
| 204795_at   | 0.084693756 | 2.125054445 | 0.037811804 | 0.102305676 |
| 204796_at   | -0.86603222 | -7.65122772 | 2.23E-10    | 3.46E-08    |
| 204797_s_at | -0.682152   | -7.12052572 | 1.75E-09    | 1.33E-07    |
| 204798_at   | 0.00846962  | 0.149841699 | 0.881404346 | 0.936604761 |
| 204799_at   | 0.017339372 | 0.765498245 | 0.447048955 | 0.626860171 |
| 204800_s_at | 0.098575818 | 2.442976046 | 0.017602085 | 0.05553635  |
| 204801_s_at | 0.056085153 | 1.429007613 | 0.158314269 | 0.305949204 |
| 204802_at   | 0.137829144 | 2.693198543 | 0.009215626 | 0.032674712 |
| 204803_s_at | 0.251831537 | 3.629142876 | 0.000598473 | 0.003330461 |
| 204804_at   | 0.084235315 | 3.029192647 | 0.003644752 | 0.015142817 |
| 204805_s_at | -0.04355571 | -0.67581266 | 0.501819544 | 0.674059842 |
| 204806_x_at | 0.137483916 | 1.996218441 | 0.050566247 | 0.128579126 |
| 204807_at   | 0.000903004 | 0.025351717 | 0.979860608 | 0.989895432 |
| 204808_s_at | 0.081829121 | 1.799784017 | 0.077046152 | 0.178310116 |
| 204809_at   | 0.07307381  | 1.38734945  | 0.170592072 | 0.323260585 |
| 204810_s_at | -0.04644275 | -1.04658596 | 0.299590843 | 0.478878066 |
| 204811_s_at | -0.30627152 | -4.29645595 | 6.63E-05    | 0.000521158 |
| 204812_at   | 0.016717115 | 0.430439226 | 0.668456071 | 0.800203828 |
| 204813_at   | -0.04398917 | -1.03570535 | 0.304597234 | 0.484571231 |
| 204814_at   | -0.22577661 | -3.74004423 | 0.000420525 | 0.002472627 |
| 204815_s_at | 0.032783437 | 1.082481265 | 0.283475532 | 0.460928781 |
| 204816_s_at | -0.00141328 | -0.07876589 | 0.937487344 | 0.967424424 |
| 204817_at   | 0.020279557 | 0.528443683 | 0.599188306 | 0.751006243 |
| 204818_at   | -0.04804175 | -1.29874176 | 0.199122943 | 0.360628472 |
| 204819_at   | -0.16230775 | -3.70707425 | 0.000467304 | 0.002704929 |
| 204820_s_at | 0.437667779 | 4.69659192  | 1.64E-05    | 0.000161659 |
| 204821_at   | 0.180514749 | 3.891697746 | 0.000257322 | 0.001633094 |
| 204822_at   | -0.01295304 | -0.45554295 | 0.650403172 | 0.788163355 |

|             |             |             |             |             |
|-------------|-------------|-------------|-------------|-------------|
| 204823_at   | 0.025080112 | 0.32757132  | 0.744403897 | 0.852000076 |
| 204824_at   | 0.011489646 | 0.19465324  | 0.846338085 | 0.915560277 |
| 204825_at   | 0.032462973 | 0.869921505 | 0.387894822 | 0.570575499 |
| 204826_at   | -0.01255762 | -0.26620588 | 0.791015624 | 0.880960659 |
| 204827_s_at | -0.00312505 | -0.10952861 | 0.913157663 | 0.953977118 |
| 204828_at   | 0.066749076 | 1.680458911 | 0.098194826 | 0.214618699 |
| 204829_s_at | -0.06597777 | -1.09973251 | 0.275948675 | 0.452386311 |
| 204830_x_at | -0.06533778 | -1.31802677 | 0.192626788 | 0.352228491 |
| 204831_at   | -0.00572229 | -0.15219991 | 0.879552379 | 0.93537073  |
| 204832_s_at | 0.107673672 | 1.691232982 | 0.096107752 | 0.21116207  |
| 204833_at   | -0.03270362 | -1.12633469 | 0.264617997 | 0.439519617 |
| 204834_at   | 0.056246291 | 1.219366585 | 0.227593268 | 0.395074899 |
| 204835_at   | 0.341744905 | 7.307578327 | 8.47E-10    | 8.45E-08    |
| 204836_at   | 0.105590738 | 2.4992776   | 0.015268673 | 0.049366095 |
| 204837_at   | 0.075012177 | 1.220860552 | 0.227031244 | 0.394543701 |
| 204838_s_at | 0.171583316 | 3.379313915 | 0.001297946 | 0.006342422 |
| 204839_at   | 0.232054581 | 4.569433524 | 2.57E-05    | 0.000236338 |
| 204840_s_at | 0.011425917 | 0.63841125  | 0.525694676 | 0.694092778 |
| 204841_s_at | 0.050655168 | 1.873043955 | 0.066055775 | 0.158522509 |
| 204842_x_at | 0.359229586 | 6.931647406 | 3.65E-09    | 2.22E-07    |
| 204843_s_at | 0.061882495 | 1.447266643 | 0.153154024 | 0.298676076 |
| 204844_at   | 0.063112025 | 1.529169328 | 0.131606044 | 0.267558446 |
| 204845_s_at | 0.017493673 | 0.757811537 | 0.451602343 | 0.63095573  |
| 204846_at   | 0.546012874 | 3.622675366 | 0.000610812 | 0.003388162 |
| 204847_at   | -0.3391729  | -4.8842784  | 8.39E-06    | 9.22E-05    |
| 204848_x_at | 0.011742748 | 0.143326015 | 0.886524712 | 0.939234631 |
| 204849_at   | 0.305173748 | 3.84098447  | 0.000303584 | 0.001882323 |
| 204850_s_at | -0.45984136 | -5.66587652 | 4.69E-07    | 8.60E-06    |
| 204851_s_at | -0.52483251 | -5.51040445 | 8.41E-07    | 1.39E-05    |
| 204852_s_at | -0.2799138  | -4.99829848 | 5.56E-06    | 6.57E-05    |
| 204853_at   | 0.04123139  | 0.77452761  | 0.441734581 | 0.622069634 |
| 204854_at   | -0.04545    | -1.10014353 | 0.275771066 | 0.452235001 |
| 204855_at   | 0.014672268 | 0.468805489 | 0.640949066 | 0.781782584 |
| 204856_at   | -0.03812663 | -0.82420954 | 0.413164603 | 0.595438795 |
| 204857_at   | -0.52261609 | -6.27848489 | 4.56E-08    | 1.37E-06    |
| 204858_s_at | 0.224967843 | 3.114513098 | 0.002850882 | 0.012309113 |
| 204859_s_at | 0.066352914 | 2.807333143 | 0.006774161 | 0.025343277 |
| 204860_s_at | 0.027227006 | 0.349197926 | 0.728193152 | 0.841353852 |
| 204861_s_at | 0.21715221  | 2.827025723 | 0.00641883  | 0.024224823 |
| 204862_s_at | 0.177619708 | 3.724362667 | 0.000442186 | 0.002579246 |
| 204863_s_at | 0.400702376 | 5.00021814  | 5.52E-06    | 6.53E-05    |
| 204864_s_at | -0.02377145 | -0.51256024 | 0.610186742 | 0.759189353 |
| 204865_at   | 0.006838219 | 0.40919367  | 0.683890173 | 0.811006968 |
| 204866_at   | 0.106192021 | 2.591433266 | 0.012046117 | 0.040616    |
| 204867_at   | -0.02706999 | -0.64290603 | 0.522794245 | 0.691591297 |
| 204868_at   | 0.077119956 | 1.618289105 | 0.11097388  | 0.235467154 |
| 204869_at   | -0.97770929 | -8.48151912 | 8.92E-12    | 5.24E-09    |
| 204870_s_at | -1.0932589  | -8.03473279 | 5.02E-11    | 1.42E-08    |
| 204871_at   | -0.06409424 | -1.95054062 | 0.055902308 | 0.139240147 |
| 204872_at   | -0.28270991 | -3.43455207 | 0.001096562 | 0.005496585 |
| 204873_at   | -0.03408713 | -1.25145986 | 0.215742427 | 0.381753991 |
| 204874_x_at | 0.239782099 | 3.500179852 | 0.000895783 | 0.004652452 |
| 204875_s_at | -0.27526207 | -4.83051675 | 1.02E-05    | 0.000108318 |
| 204876_at   | -0.07033684 | -1.28125267 | 0.205154906 | 0.368357361 |
| 204877_s_at | -0.00518546 | -0.11563386 | 0.908338302 | 0.951493153 |
| 204878_s_at | -0.06510634 | -1.14710043 | 0.256004768 | 0.429458324 |
| 204879_at   | 0.044348956 | 0.893163071 | 0.37542534  | 0.558408803 |
| 204880_at   | 0.062313936 | 1.572502944 | 0.121221224 | 0.251467644 |
| 204881_s_at | -0.11014239 | -1.41950757 | 0.161052002 | 0.309793237 |
| 204882_at   | 0.092963714 | 1.992412501 | 0.0509935   | 0.129451946 |
| 204883_s_at | 0.138689856 | 4.214267708 | 8.78E-05    | 0.000659565 |
| 204884_s_at | -0.05752707 | -2.78848974 | 0.00713106  | 0.026450439 |
| 204885_s_at | 0.001516501 | 0.06647316  | 0.947227528 | 0.972870632 |
| 204886_at   | 0.000879965 | 0.047690576 | 0.962125103 | 0.980768815 |
| 204887_s_at | -0.02834911 | -1.05905552 | 0.293922929 | 0.472501117 |
| 204888_s_at | -0.21965842 | -4.64199752 | 1.99E-05    | 0.000190368 |
| 204889_s_at | -0.33836778 | -5.99491561 | 1.35E-07    | 3.19E-06    |
| 204890_s_at | -0.0029309  | -0.05906607 | 0.953100569 | 0.975875063 |
| 204891_s_at | 0.064192729 | 1.339001096 | 0.185744371 | 0.343460124 |
| 204892_x_at | -0.04130432 | -0.91366863 | 0.364637163 | 0.547997985 |
| 204893_s_at | -0.08264773 | -1.95238208 | 0.055678229 | 0.138813534 |
| 204894_s_at | -0.02244412 | -0.41077528 | 0.682736414 | 0.810369846 |
| 204895_x_at | -0.05774737 | -2.31510834 | 0.02413078  | 0.071681808 |
| 204896_s_at | 0.059413549 | 1.306095994 | 0.196626553 | 0.357438842 |
| 204897_at   | 0.064696707 | 2.192496505 | 0.032329812 | 0.090435247 |

|             |             |             |             |             |
|-------------|-------------|-------------|-------------|-------------|
| 204898_at   | 0.025272671 | 0.890201604 | 0.376999952 | 0.559707731 |
| 204899_s_at | 0.119918774 | 2.849209827 | 0.006039189 | 0.023025375 |
| 204900_x_at | 0.387713364 | 3.763471977 | 0.000390047 | 0.002322094 |
| 204901_at   | -0.08194541 | -2.11962384 | 0.03828663  | 0.103286153 |
| 204902_s_at | 0.051239681 | 1.468750587 | 0.147251489 | 0.290344061 |
| 204903_x_at | 0.02571695  | 0.591671336 | 0.55634779  | 0.718603701 |
| 204904_at   | 0.118274701 | 2.466377517 | 0.016595804 | 0.052868594 |
| 204905_s_at | -0.29653638 | -3.17384251 | 0.002397669 | 0.010605366 |
| 204906_at   | 0.022327579 | 0.477422964 | 0.634837902 | 0.777362472 |
| 204907_s_at | 0.064075572 | 1.458098081 | 0.150155497 | 0.294434427 |
| 204908_s_at | 0.251156807 | 3.158694055 | 0.002506481 | 0.011020134 |
| 204909_at   | 0.050843982 | 0.991480814 | 0.325529632 | 0.507714895 |
| 204910_s_at | -0.00943331 | -0.35921879 | 0.720723329 | 0.836616374 |
| 204911_s_at | -0.13872568 | -4.11077351 | 0.000124492 | 0.000888073 |
| 204912_at   | 0.134356576 | 2.925125179 | 0.00489151  | 0.019375288 |
| 204913_s_at | -0.23669235 | -1.98385113 | 0.051965942 | 0.13142945  |
| 204914_s_at | -0.19222684 | -3.8590824  | 0.000286226 | 0.001789842 |
| 204915_s_at | -0.270702   | -4.73248351 | 1.45E-05    | 0.000145103 |
| 204916_at   | 0.228851637 | 3.368320757 | 0.001341996 | 0.006525568 |
| 204917_s_at | -0.22357276 | -4.5125651  | 3.14E-05    | 0.00027833  |
| 204918_s_at | -0.17380785 | -3.35679944 | 0.001389679 | 0.006717233 |
| 204919_at   | -0.06472661 | -1.60618118 | 0.113613042 | 0.239566242 |
| 204920_at   | 0.103666025 | 2.271426425 | 0.02681149  | 0.07785959  |
| 204921_at   | 0.120544696 | 3.511340935 | 0.000865321 | 0.00451681  |
| 204922_at   | -0.12616085 | -2.67446075 | 0.009686072 | 0.034010837 |
| 204923_at   | 0.070140471 | 1.138166468 | 0.259685609 | 0.433730475 |
| 204924_at   | 0.111327473 | 2.112502878 | 0.038917125 | 0.104568353 |
| 204925_at   | 0.138941645 | 3.415951351 | 0.001160814 | 0.00576883  |
| 204926_at   | -0.01630845 | -0.76095931 | 0.449734445 | 0.629172097 |
| 204927_at   | -0.0980082  | -2.22183629 | 0.030171592 | 0.08549636  |
| 204928_s_at | 0.097071302 | 2.739626029 | 0.008138707 | 0.029500008 |
| 204929_s_at | 0.414802514 | 5.104328502 | 3.78E-06    | 4.78E-05    |
| 204930_s_at | -0.01199858 | -0.32610903 | 0.745504289 | 0.852735403 |
| 204931_at   | -0.00422471 | -0.14803403 | 0.882824406 | 0.937333722 |
| 204932_at   | 0.150145999 | 3.002842029 | 0.003928882 | 0.016158054 |
| 204933_s_at | 0.258849279 | 2.607288784 | 0.01155856  | 0.039265366 |
| 204934_s_at | 0.020547063 | 0.498827611 | 0.619769315 | 0.766667001 |
| 204935_at   | -0.00488558 | -0.32315533 | 0.747728616 | 0.854529269 |
| 204936_at   | 0.016066176 | 0.36673695  | 0.715136938 | 0.832987569 |
| 204937_s_at | 0.082961169 | 1.783498781 | 0.079686719 | 0.183112696 |
| 204938_s_at | -0.01917988 | -0.42854889 | 0.669823641 | 0.8011711   |
| 204939_s_at | 0.046386987 | 0.864424003 | 0.390881775 | 0.573704049 |
| 204940_at   | -0.0379594  | -1.84926516 | 0.069468101 | 0.164818591 |
| 204941_s_at | 0.036281543 | 1.500628798 | 0.138823787 | 0.278293196 |
| 204942_s_at | -0.01077998 | -0.26295523 | 0.793507952 | 0.882460911 |
| 204943_at   | 0.06671153  | 1.822568161 | 0.073474918 | 0.171887617 |
| 204944_at   | -0.03139357 | -0.63255602 | 0.529485608 | 0.696997756 |
| 204945_at   | -0.59697149 | -5.99911926 | 1.33E-07    | 3.16E-06    |
| 204946_s_at | 0.048899986 | 1.519000836 | 0.134142619 | 0.271340835 |
| 204947_at   | 0.011023644 | 0.23498218  | 0.815042222 | 0.896416069 |
| 204948_s_at | 0.046164439 | 1.303277104 | 0.19758063  | 0.358575227 |
| 204949_at   | 0.038184672 | 0.837042065 | 0.40597158  | 0.588354688 |
| 204950_at   | 0.157602635 | 3.611874247 | 0.000631963 | 0.003488169 |
| 204951_at   | -0.03493798 | -0.83768516 | 0.405613134 | 0.587916301 |
| 204952_at   | -0.01871843 | -0.48397335 | 0.630209619 | 0.774049201 |
| 204953_at   | -0.85412566 | -5.93400341 | 1.70E-07    | 3.82E-06    |
| 204954_s_at | -0.08881216 | -2.05746717 | 0.044102364 | 0.115609293 |
| 204955_at   | 1.032985041 | 6.533479571 | 1.71E-08    | 6.59E-07    |
| 204956_at   | 0.042347275 | 2.360958263 | 0.021575971 | 0.065507695 |
| 204957_at   | -0.35482378 | -5.08307534 | 4.08E-06    | 5.10E-05    |
| 204958_at   | 0.00961207  | 0.223412148 | 0.823992199 | 0.902262877 |
| 204959_at   | -0.00752123 | -0.17126781 | 0.864603561 | 0.926639385 |
| 204960_at   | 0.053348004 | 0.954558002 | 0.343724736 | 0.526574089 |
| 204961_s_at | 0.086379753 | 1.936602318 | 0.057623518 | 0.142487767 |
| 204962_s_at | 0.010097939 | 0.329899998 | 0.742652638 | 0.850845489 |
| 204963_at   | 0.317813779 | 4.330359886 | 5.90E-05    | 0.000473011 |
| 204964_s_at | 0.900400353 | 6.444897257 | 2.40E-08    | 8.41E-07    |
| 204965_at   | 0.004898964 | 0.116113459 | 0.907959856 | 0.951208201 |
| 204966_at   | -0.65015984 | -6.65235983 | 1.08E-08    | 4.73E-07    |
| 204967_at   | -0.01577713 | -0.34518744 | 0.73119016  | 0.843211846 |
| 204968_at   | 0.072174769 | 1.885532339 | 0.064321116 | 0.155369113 |
| 204969_s_at | 0.181730983 | 2.422483991 | 0.018527953 | 0.05788949  |
| 204970_s_at | 0.048018949 | 1.157883427 | 0.251611822 | 0.424550688 |
| 204971_at   | 0.179647035 | 2.658563932 | 0.010102296 | 0.035176612 |
| 204972_at   | -0.01243133 | -0.21430011 | 0.83105743  | 0.906490095 |

|             |             |             |             |             |
|-------------|-------------|-------------|-------------|-------------|
| 204973_at   | -0.00237584 | -0.03342184 | 0.973451838 | 0.986541862 |
| 204974_at   | -0.61703207 | -6.53738733 | 1.68E-08    | 6.52E-07    |
| 204975_at   | 0.322231364 | 4.567183607 | 2.59E-05    | 0.000238018 |
| 204976_s_at | 0.070200136 | 2.536875751 | 0.013869933 | 0.045558949 |
| 204977_at   | -0.1600639  | -3.78966374 | 0.000358479 | 0.002160476 |
| 204978_at   | 0.051778198 | 1.048013941 | 0.298938    | 0.478155295 |
| 204979_s_at | 0.021934284 | 0.446697678 | 0.656740824 | 0.792246502 |
| 204980_at   | 0.040620433 | 1.188142194 | 0.239573338 | 0.409445952 |
| 204981_at   | 0.012277969 | 0.355548552 | 0.723456097 | 0.838307965 |
| 204982_at   | 0.001422224 | 0.043184908 | 0.965701034 | 0.982512382 |
| 204983_s_at | 0.217529618 | 3.635619776 | 0.000586354 | 0.003276484 |
| 204984_at   | 0.366694321 | 4.614667166 | 2.19E-05    | 0.000206562 |
| 204985_s_at | 0.057443143 | 1.325776288 | 0.19006183  | 0.348834519 |
| 204986_s_at | -0.14997263 | -3.08918162 | 0.003067848 | 0.013090343 |
| 204987_at   | -0.08478649 | -1.28151852 | 0.205062206 | 0.368264893 |
| 204988_at   | -0.11038525 | -2.0380726  | 0.046067149 | 0.119727438 |
| 204989_s_at | 0.612937229 | 4.924319332 | 7.26E-06    | 8.22E-05    |
| 204990_s_at | 0.891670273 | 7.011223669 | 2.68E-09    | 1.78E-07    |
| 204991_s_at | 0.097936226 | 2.589629219 | 0.012102761 | 0.040773148 |
| 204992_s_at | -0.32174863 | -4.54638076 | 2.79E-05    | 0.000252414 |
| 204993_at   | 0.007222462 | 0.143078595 | 0.886719244 | 0.939238898 |
| 204994_at   | 0.018561126 | 0.366843394 | 0.715057956 | 0.832917279 |
| 204995_at   | -0.91331389 | -5.3237468  | 1.68E-06    | 2.46E-05    |
| 204996_s_at | -0.13416964 | -2.61756882 | 0.011252118 | 0.038381899 |
| 204997_at   | 0.022797757 | 0.415238342 | 0.679484779 | 0.808098505 |
| 204998_s_at | -0.03489824 | -0.76834878 | 0.445367213 | 0.625588569 |
| 204999_s_at | 0.019890854 | 0.671813126 | 0.50434424  | 0.676292501 |
| 205000_at   | 0.271312856 | 1.610868109 | 0.112585478 | 0.238016565 |
| 205001_s_at | 0.158604797 | 2.668702745 | 0.009834988 | 0.034433629 |
| 205002_at   | 0.04869351  | 1.087190421 | 0.281406872 | 0.458683246 |
| 205003_at   | -0.43485358 | -4.57387806 | 2.53E-05    | 0.000233203 |
| 205004_at   | -0.19706606 | -4.32821627 | 5.95E-05    | 0.000475739 |
| 205005_s_at | -0.17082627 | -2.9912896  | 0.004059841 | 0.016594329 |
| 205006_s_at | -0.10901301 | -1.71520394 | 0.091594773 | 0.203689784 |
| 205007_s_at | -0.0270334  | -0.55026615 | 0.584229543 | 0.739883616 |
| 205008_s_at | 0.054204188 | 1.725661531 | 0.089681407 | 0.200452184 |
| 205009_at   | 0.098809071 | 2.104697678 | 0.039618578 | 0.106076773 |
| 205010_at   | 0.150492181 | 3.74292985  | 0.000416651 | 0.00245524  |
| 205011_at   | -0.0637639  | -1.13226688 | 0.262136789 | 0.436621101 |
| 205012_s_at | -0.19520079 | -3.48786758 | 0.00093057  | 0.004801042 |
| 205013_s_at | -1.23269445 | -8.46563792 | 9.48E-12    | 5.36E-09    |
| 205014_at   | 0.000373781 | 0.007836634 | 0.993773968 | 0.997190596 |
| 205015_s_at | -0.03472593 | -0.96901367 | 0.336523236 | 0.519327988 |
| 205016_at   | 0.036459937 | 0.476571342 | 0.635440711 | 0.777717231 |
| 205017_s_at | -0.27316548 | -4.61159804 | 2.22E-05    | 0.000208414 |
| 205018_s_at | -0.55973986 | -4.0959159  | 0.000130852 | 0.000925912 |
| 205019_s_at | -0.16325705 | -2.90453311 | 0.005180995 | 0.020289961 |
| 205020_s_at | 0.068596743 | 1.894075228 | 0.06315684  | 0.153144457 |
| 205021_s_at | -0.04071263 | -0.70678819 | 0.482500804 | 0.657559492 |
| 205022_s_at | 0.394392609 | 5.438625662 | 1.10E-06    | 1.72E-05    |
| 205023_at   | 0.068696315 | 3.870806295 | 0.000275494 | 0.001730726 |
| 205024_s_at | 0.001022313 | 0.036737857 | 0.97081896  | 0.985214037 |
| 205025_at   | 0.059264976 | 2.006756355 | 0.049399283 | 0.126294419 |
| 205026_at   | 0.001464889 | 0.047747382 | 0.962080024 | 0.980756335 |
| 205027_s_at | 0.083804241 | 3.425072917 | 0.001128872 | 0.005632334 |
| 205028_at   | -0.02043956 | -0.87612891 | 0.384539358 | 0.567133055 |
| 205029_s_at | 0.130349951 | 0.962153947 | 0.339928102 | 0.522791471 |
| 205030_at   | 0.144632764 | 1.171248338 | 0.246242214 | 0.417755951 |
| 205031_at   | -0.49948322 | -5.55275361 | 7.17E-07    | 1.22E-05    |
| 205032_at   | 0.19244852  | 3.702840948 | 0.00047366  | 0.002735693 |
| 205033_s_at | -0.02824188 | -0.84183518 | 0.403304684 | 0.585666275 |
| 205034_at   | 0.141001341 | 1.623809998 | 0.109787082 | 0.233569966 |
| 205035_at   | 0.096865472 | 2.527991559 | 0.014189554 | 0.046380426 |
| 205036_at   | 0.124146409 | 2.643842343 | 0.010502251 | 0.036275409 |
| 205037_at   | -0.02722921 | -0.38971644 | 0.69815988  | 0.821286848 |
| 205038_at   | 0.032837545 | 0.899003004 | 0.372332482 | 0.555496916 |
| 205039_s_at | 0.043114459 | 1.222866008 | 0.226278397 | 0.393832625 |
| 205040_at   | -0.07016535 | -1.60367772 | 0.114164997 | 0.2404799   |
| 205041_s_at | -0.02090754 | -0.82190193 | 0.414466258 | 0.596679746 |
| 205042_at   | 0.020158188 | 0.327094873 | 0.744762372 | 0.852130241 |
| 205043_at   | -0.08259788 | -1.76822422 | 0.082231572 | 0.187428265 |
| 205044_at   | -0.01121811 | -0.18683776 | 0.852433567 | 0.919044663 |
| 205045_at   | -0.01164906 | -0.29365933 | 0.770056395 | 0.868394954 |
| 205046_at   | -0.07751008 | -1.46422021 | 0.148481101 | 0.292163842 |
| 205047_s_at | -0.33395898 | -3.82241744 | 0.000322441 | 0.00197784  |

|             |             |             |             |             |
|-------------|-------------|-------------|-------------|-------------|
| 205048_s_at | 0.231562924 | 0.924663367 | 0.358935374 | 0.542053785 |
| 205049_s_at | -0.04880057 | -0.80897917 | 0.42180146  | 0.603777812 |
| 205050_s_at | -0.34966281 | -5.0762246  | 4.18E-06    | 5.20E-05    |
| 205051_s_at | -0.03127377 | -0.32974222 | 0.742771251 | 0.850915943 |
| 205052_at   | -0.37022779 | -4.40069081 | 4.63E-05    | 0.000386259 |
| 205053_at   | -0.00666962 | -0.18595424 | 0.853123219 | 0.919475673 |
| 205054_at   | -0.03978603 | -0.82088994 | 0.415037877 | 0.597252562 |
| 205055_at   | -0.3529365  | -5.42320551 | 1.16E-06    | 1.80E-05    |
| 205056_s_at | -0.12031199 | -2.54169135 | 0.013699423 | 0.045088345 |
| 205057_s_at | 0.047554867 | 1.346979789 | 0.183175807 | 0.340126019 |
| 205058_at   | 0.053977767 | 1.237710097 | 0.220762696 | 0.387659675 |
| 205059_s_at | 0.047614655 | 1.234364369 | 0.221997174 | 0.388986815 |
| 205060_at   | -0.04465586 | -1.12314829 | 0.265957582 | 0.441176463 |
| 205061_s_at | -0.05215576 | -2.1899553  | 0.032522976 | 0.090826399 |
| 205062_x_at | -0.09128955 | -1.80210425 | 0.076675958 | 0.17760972  |
| 205063_at   | 0.010697454 | 0.377345476 | 0.707280854 | 0.827611561 |
| 205064_at   | -0.04806541 | -1.20618043 | 0.232597994 | 0.401129445 |
| 205065_at   | -0.00884694 | -0.37178535 | 0.711394452 | 0.830421867 |
| 205066_s_at | 0.07919985  | 1.436798371 | 0.15609621  | 0.30273615  |
| 205067_at   | 0.015761354 | 0.194851446 | 0.84618362  | 0.91548465  |
| 205068_s_at | 0.175716948 | 2.83091574  | 0.006350706 | 0.024016394 |
| 205069_s_at | -0.06597376 | -1.60142049 | 0.114664519 | 0.241326842 |
| 205070_at   | 0.206723023 | 3.949015677 | 0.000213193 | 0.001390949 |
| 205071_x_at | -0.03403347 | -0.82559399 | 0.412384874 | 0.594641052 |
| 205072_s_at | 0.005915285 | 0.226511889 | 0.821592043 | 0.900826565 |
| 205073_at   | 0.468189963 | 6.927417144 | 3.71E-09    | 2.24E-07    |
| 205074_at   | 0.25299863  | 4.806159365 | 1.11E-05    | 0.000116453 |
| 205075_at   | -0.01962951 | -0.45482201 | 0.650918767 | 0.788435105 |
| 205076_s_at | 0.164523069 | 2.863576458 | 0.005804514 | 0.022278886 |
| 205077_s_at | 0.152743345 | 2.368099022 | 0.021200589 | 0.064582967 |
| 205078_at   | 0.018645869 | 0.290654585 | 0.772342287 | 0.869777921 |
| 205079_s_at | 0.396769387 | 4.932525625 | 7.05E-06    | 8.03E-05    |
| 205080_at   | -0.43781372 | -6.20157333 | 6.12E-08    | 1.73E-06    |
| 205081_at   | 0.290511938 | 2.956470403 | 0.004479542 | 0.018025627 |
| 205082_s_at | -0.01777668 | -0.29912257 | 0.765905431 | 0.865548475 |
| 205083_at   | -0.02621601 | -0.53971643 | 0.591438863 | 0.745251769 |
| 205084_at   | -0.18079134 | -3.1916513  | 0.002275421 | 0.010157123 |
| 205085_at   | -0.0242537  | -0.91893587 | 0.3618984   | 0.545110151 |
| 205086_s_at | -0.00320303 | -0.0907281  | 0.928018233 | 0.962371656 |
| 205087_at   | 0.046953416 | 1.113968114 | 0.26984374  | 0.445506333 |
| 205088_at   | -0.06982671 | -1.68765197 | 0.096797363 | 0.212332421 |
| 205089_at   | 0.031829703 | 0.965573198 | 0.338228113 | 0.521014374 |
| 205090_s_at | -0.44456455 | -6.53563911 | 1.69E-08    | 6.54E-07    |
| 205091_x_at | 0.062527654 | 1.755490001 | 0.084404525 | 0.191317494 |
| 205092_x_at | 0.04766054  | 1.332611201 | 0.187821082 | 0.345948723 |
| 205093_at   | -0.08881185 | -1.80938741 | 0.07552358  | 0.175577394 |
| 205094_at   | 0.101639348 | 2.533377701 | 0.013994994 | 0.045875333 |
| 205095_s_at | -0.33066341 | -4.17288509 | 0.00010099  | 0.000743165 |
| 205096_at   | -0.04431491 | -1.29876502 | 0.199115009 | 0.360628472 |
| 205097_at   | 0.30867441  | 2.916349121 | 0.005013    | 0.019758444 |
| 205098_at   | 0.101052092 | 1.473625347 | 0.145937342 | 0.288470581 |
| 205099_s_at | 0.093201798 | 2.127872451 | 0.037567442 | 0.101761569 |
| 205100_at   | 0.140122612 | 2.48490162  | 0.015836321 | 0.05087384  |
| 205101_at   | 0.117557516 | 3.713868217 | 0.000457275 | 0.002657199 |
| 205102_at   | 0.000132973 | 0.004242371 | 0.996629506 | 0.998461463 |
| 205103_at   | -0.19168804 | -2.380792   | 0.020547714 | 0.0629191   |
| 205104_at   | -0.29867862 | -3.86445556 | 0.000281258 | 0.001762974 |
| 205105_at   | 0.492972027 | 4.204834012 | 9.06E-05    | 0.000678623 |
| 205106_at   | 0.021650197 | 0.617654773 | 0.539197248 | 0.705085214 |
| 205107_s_at | 0.094208331 | 3.862885515 | 0.000282701 | 0.001770776 |
| 205108_s_at | 0.009575959 | 0.179038252 | 0.858525612 | 0.922891802 |
| 205109_s_at | -0.2963857  | -4.52060597 | 3.05E-05    | 0.000272238 |
| 205110_s_at | -1.61753929 | -7.62734523 | 2.44E-10    | 3.69E-08    |
| 205111_s_at | 0.457808628 | 5.003998245 | 5.44E-06    | 6.45E-05    |
| 205112_at   | 0.314567457 | 5.25284511  | 2.19E-06    | 3.05E-05    |
| 205113_at   | -1.25977454 | -7.12295117 | 1.74E-09    | 1.32E-07    |
| 205114_s_at | 0.051114025 | 0.381411627 | 0.70427809  | 0.825611069 |
| 205115_s_at | -0.01449984 | -0.34937325 | 0.728062228 | 0.84128958  |
| 205116_at   | 0.164702947 | 3.521774065 | 0.000837738 | 0.004397308 |
| 205117_at   | 0.535331354 | 5.729607883 | 3.69E-07    | 7.07E-06    |
| 205118_at   | -0.00357947 | -0.14444478 | 0.885645173 | 0.938700708 |
| 205119_s_at | 0.228161917 | 1.99512372  | 0.050688824 | 0.128868816 |
| 205120_s_at | 0.090820465 | 1.332863149 | 0.187738868 | 0.345823525 |
| 205121_at   | -0.10398598 | -3.3659868  | 0.001351529 | 0.006561246 |
| 205122_at   | -0.47976229 | -4.23580312 | 8.16E-05    | 0.00062063  |

|             |             |             |             |             |
|-------------|-------------|-------------|-------------|-------------|
| 205123_s_at | -0.8389479  | -6.21032405 | 5.92E-08    | 1.68E-06    |
| 205124_at   | 0.013615856 | 0.212131047 | 0.832741349 | 0.907519791 |
| 205125_at   | 0.198341122 | 4.511688379 | 3.15E-05    | 0.000278933 |
| 205126_at   | 0.192595739 | 3.56511312  | 0.000731861 | 0.003939342 |
| 205127_at   | -0.00127858 | -0.0326476  | 0.974066623 | 0.98685162  |
| 205128_x_at | 0.083485937 | 1.882595875 | 0.06472549  | 0.156101213 |
| 205129_at   | -0.0440561  | -1.10274437 | 0.274649043 | 0.45092922  |
| 205130_at   | 0.287008424 | 4.328233973 | 5.95E-05    | 0.000475739 |
| 205131_x_at | 0.047484361 | 1.388757969 | 0.170165317 | 0.322666558 |
| 205132_at   | 0.015590366 | 0.831024374 | 0.409335084 | 0.591522087 |
| 205133_s_at | 0.130188195 | 1.274568372 | 0.207495958 | 0.371248223 |
| 205134_s_at | 0.015818662 | 0.492200271 | 0.624417794 | 0.769627783 |
| 205135_s_at | -0.03847613 | -1.18400308 | 0.241195053 | 0.411383784 |
| 205136_s_at | -0.01222895 | -0.37052682 | 0.712326762 | 0.831057187 |
| 205137_x_at | 0.17560737  | 2.604898051 | 0.011630906 | 0.039454153 |
| 205138_s_at | 0.019573594 | 0.586585806 | 0.559736199 | 0.721330167 |
| 205139_s_at | -0.24402543 | -3.90669574 | 0.000244993 | 0.001567087 |
| 205140_at   | 0.108818641 | 2.124140881 | 0.037891321 | 0.102429338 |
| 205141_at   | 0.154382784 | 3.507920278 | 0.000874551 | 0.004557004 |
| 205142_x_at | -0.00495473 | -0.09145299 | 0.927444743 | 0.962059244 |
| 205143_at   | -0.66866856 | -5.56897415 | 6.75E-07    | 1.15E-05    |
| 205144_at   | -0.01641225 | -0.47081045 | 0.63952498  | 0.780845274 |
| 205145_s_at | -0.10046493 | -1.68306819 | 0.097685997 | 0.213736542 |
| 205146_x_at | 0.161419112 | 4.854898073 | 9.33E-06    | 0.000100895 |
| 205147_x_at | 0.051544009 | 1.222088757 | 0.22656996  | 0.394048513 |
| 205148_s_at | -0.22256995 | -3.35189903 | 0.001410442 | 0.006808022 |
| 205149_s_at | -0.36824061 | -4.18033605 | 9.85E-05    | 0.000727463 |
| 205150_s_at | 0.437906374 | 3.498798064 | 0.000899625 | 0.004669149 |
| 205151_s_at | 0.371784442 | 3.461643109 | 0.001008988 | 0.005133031 |
| 205152_at   | -0.09673733 | -1.48096496 | 0.143976105 | 0.285714671 |
| 205153_s_at | 0.04461095  | 1.03785114  | 0.303605429 | 0.483389164 |
| 205154_at   | -0.09138484 | -2.07092651 | 0.042781876 | 0.112764631 |
| 205155_s_at | -0.57650229 | -6.56513187 | 1.51E-08    | 6.06E-07    |
| 205156_s_at | -0.12347339 | -2.582953   | 0.012314492 | 0.041327572 |
| 205157_s_at | 0.030356847 | 1.034275811 | 0.305259206 | 0.485261593 |
| 205158_at   | 0.282160326 | 4.096229918 | 0.000130715 | 0.000925231 |
| 205159_at   | 0.067755954 | 1.412191084 | 0.163185371 | 0.312811928 |
| 205160_at   | 0.258043981 | 4.359181382 | 5.35E-05    | 0.000436254 |
| 205161_s_at | 0.076989233 | 2.077029484 | 0.042194503 | 0.111596445 |
| 205162_at   | 0.006195277 | 0.198564811 | 0.843290871 | 0.913878652 |
| 205163_at   | -0.08023736 | -1.88727417 | 0.064082264 | 0.154934517 |
| 205164_at   | 0.040809715 | 0.859529331 | 0.393553218 | 0.57634441  |
| 205165_at   | -0.18139736 | -2.59664366 | 0.011883873 | 0.040147709 |
| 205166_at   | 0.064596444 | 1.883576762 | 0.064590175 | 0.155842148 |
| 205167_s_at | 0.002705016 | 0.09671463  | 0.923283225 | 0.959875267 |
| 205168_at   | 0.450556226 | 6.08017102  | 9.74E-08    | 2.47E-06    |
| 205169_at   | 0.050114025 | 1.086317857 | 0.281789381 | 0.459021629 |
| 205170_at   | 0.014537721 | 0.347156035 | 0.729718513 | 0.842375313 |
| 205171_at   | -0.09219631 | -0.93991081 | 0.351123858 | 0.534350788 |
| 205172_x_at | -0.3807857  | -4.04747431 | 0.000153847 | 0.00105602  |
| 205173_x_at | 0.169467297 | 2.224937032 | 0.029951093 | 0.085026632 |
| 205174_s_at | -0.07439036 | -2.3977012  | 0.019705928 | 0.060846853 |
| 205175_s_at | -0.12409929 | -2.27384895 | 0.026656184 | 0.077509315 |
| 205176_s_at | 0.142161343 | 2.17619118  | 0.033586946 | 0.093193506 |
| 205177_at   | 0.002366081 | 0.07518238  | 0.940325826 | 0.968787704 |
| 205178_s_at | 0.169664477 | 2.902205357 | 0.005214699 | 0.02038801  |
| 205179_s_at | 0.060418147 | 1.604736433 | 0.113931311 | 0.240089646 |
| 205180_s_at | -0.01363158 | -0.41907171 | 0.676696794 | 0.806005359 |
| 205181_at   | 0.190471749 | 4.489717917 | 3.40E-05    | 0.000298368 |
| 205182_s_at | 0.110420745 | 3.252174056 | 0.001902331 | 0.008746807 |
| 205183_at   | 0.056843869 | 1.539936257 | 0.128961907 | 0.263591412 |
| 205184_at   | -0.32598947 | -4.87672191 | 8.62E-06    | 9.44E-05    |
| 205185_at   | -0.06714798 | -1.29399349 | 0.200747315 | 0.362760755 |
| 205186_at   | 0.344294762 | 3.107349317 | 0.002910737 | 0.012511942 |
| 205187_at   | 0.11854413  | 3.524661664 | 0.000830253 | 0.004364859 |
| 205188_s_at | 0.136742726 | 2.738809851 | 0.008156597 | 0.02955766  |
| 205189_s_at | 0.058235495 | 1.106596323 | 0.272993167 | 0.448964512 |
| 205190_at   | 0.018848213 | 0.512871978 | 0.609970001 | 0.759078308 |
| 205191_at   | 0.077509081 | 3.785922074 | 0.000362834 | 0.002179834 |
| 205192_at   | -0.0716477  | -1.79728898 | 0.077445902 | 0.179020373 |
| 205193_at   | 0.144056821 | 3.030807163 | 0.003627982 | 0.015081554 |
| 205194_at   | 0.125362105 | 3.57098369  | 0.00071854  | 0.003878851 |
| 205195_at   | -0.57371081 | -5.91976738 | 1.80E-07    | 3.96E-06    |
| 205196_s_at | -0.70291251 | -6.09201662 | 9.31E-08    | 2.39E-06    |
| 205197_s_at | 0.138864106 | 2.799131949 | 0.006927421 | 0.025823696 |

|             |             |             |             |             |
|-------------|-------------|-------------|-------------|-------------|
| 205198_s_at | 0.100644475 | 2.727293631 | 0.008412898 | 0.030321711 |
| 205199_at   | -0.01465178 | -0.2925292  | 0.77091591  | 0.868878385 |
| 205200_at   | 0.385800622 | 2.453915968 | 0.017125022 | 0.05429565  |
| 205201_at   | 0.061973998 | 0.992575567 | 0.325000138 | 0.507182728 |
| 205202_at   | -0.45088467 | -3.90250139 | 0.000248383 | 0.001584912 |
| 205203_at   | 0.014844518 | 0.348869294 | 0.728438577 | 0.841506885 |
| 205204_at   | 0.17741473  | 4.06826886  | 0.000143535 | 0.000997489 |
| 205205_at   | 0.013606925 | 0.307912847 | 0.759241078 | 0.861371367 |
| 205206_at   | 0.20511977  | 1.868944553 | 0.066633741 | 0.159640821 |
| 205207_at   | 0.085400302 | 1.749136927 | 0.085506302 | 0.193295278 |
| 205208_at   | 0.416969424 | 3.506915948 | 0.000877279 | 0.004569619 |
| 205209_at   | -0.14841592 | -2.15237309 | 0.035500345 | 0.097342256 |
| 205210_at   | 0.110696784 | 2.497772501 | 0.01532723  | 0.049519595 |
| 205211_s_at | -0.12204558 | -2.08403569 | 0.04152884  | 0.110142241 |
| 205212_s_at | -0.11268221 | -1.28308113 | 0.204517964 | 0.367612486 |
| 205213_at   | -0.0586294  | -1.48673253 | 0.14244953  | 0.283503492 |
| 205214_at   | 0.000592477 | 0.017439971 | 0.9861449   | 0.993301507 |
| 205215_at   | -0.14953638 | -3.31707714 | 0.001566652 | 0.007429627 |
| 205216_s_at | 0.039589789 | 0.965084679 | 0.338470652 | 0.521184579 |
| 205217_at   | -0.09632105 | -2.71151543 | 0.008776053 | 0.031357479 |
| 205218_at   | -0.04103391 | -1.59214003 | 0.116736834 | 0.244579674 |
| 205219_s_at | 0.056714362 | 1.234697969 | 0.221873858 | 0.388831718 |
| 205220_at   | -0.00272803 | -0.06241428 | 0.950445444 | 0.974619156 |
| 205221_at   | 0.031167984 | 1.341866685 | 0.184818732 | 0.342224012 |
| 205222_at   | 0.07376618  | 2.733912044 | 0.008264712 | 0.029879187 |
| 205223_at   | -0.0148278  | -0.44617771 | 0.657114177 | 0.792544779 |
| 205224_at   | -0.0083899  | -0.19481163 | 0.846214646 | 0.91548465  |
| 205225_at   | 0.014355387 | 0.384827976 | 0.701758838 | 0.823889615 |
| 205226_at   | -0.02252604 | -0.53760854 | 0.592884336 | 0.746197987 |
| 205227_at   | -0.00246047 | -0.0947107  | 0.92486792  | 0.960644617 |
| 205228_at   | 0.006549678 | 0.151146551 | 0.880379529 | 0.935916316 |
| 205229_s_at | -1.68402843 | -6.57105781 | 1.48E-08    | 5.96E-07    |
| 205230_at   | -0.65888974 | -6.02593351 | 1.20E-07    | 2.91E-06    |
| 205231_s_at | 0.16663852  | 3.263814942 | 0.001837521 | 0.008500414 |
| 205232_s_at | 0.046534071 | 1.211344897 | 0.230628389 | 0.398763694 |
| 205233_s_at | 0.072788215 | 2.294896704 | 0.025340029 | 0.074486751 |
| 205234_at   | 0.085808527 | 2.477992451 | 0.016115851 | 0.051612297 |
| 205235_s_at | -0.10314568 | -3.33216105 | 0.001497079 | 0.007151288 |
| 205236_x_at | 0.054009083 | 1.168847398 | 0.247200719 | 0.418982132 |
| 205237_at   | 0.021679913 | 0.498813778 | 0.619779001 | 0.766667001 |
| 205238_at   | 0.018601776 | 0.442028093 | 0.66009687  | 0.794534051 |
| 205239_at   | 0.049010935 | 2.224005825 | 0.030017163 | 0.0851601   |
| 205240_at   | 0.114477885 | 2.136669672 | 0.036813443 | 0.100131847 |
| 205241_at   | 0.134422126 | 2.573421374 | 0.012622615 | 0.042184245 |
| 205242_at   | -0.03875208 | -0.75146528 | 0.455381885 | 0.634306912 |
| 205243_at   | 0.185868196 | 4.328077463 | 5.95E-05    | 0.000475881 |
| 205244_s_at | 0.128022661 | 2.517122115 | 0.014589656 | 0.047462579 |
| 205245_at   | -0.17341874 | -3.08412641 | 0.003112955 | 0.013254802 |
| 205246_at   | -0.01193453 | -0.34068746 | 0.734557979 | 0.845472847 |
| 205247_at   | 0.093679508 | 1.992863444 | 0.050942716 | 0.129359766 |
| 205248_at   | -0.27747824 | -6.36326458 | 3.29E-08    | 1.07E-06    |
| 205249_at   | -0.18779842 | -2.5436894  | 0.013629236 | 0.044897015 |
| 205250_s_at | 0.020685342 | 0.650745654 | 0.517755677 | 0.687387836 |
| 205251_at   | 0.157955095 | 2.001378284 | 0.049991921 | 0.12743752  |
| 205252_at   | -0.05203333 | -1.52359462 | 0.132991917 | 0.269664477 |
| 205253_at   | 0.041961427 | 0.95466475  | 0.343671189 | 0.526523377 |
| 205254_x_at | 0.00225981  | 0.051834522 | 0.958836941 | 0.978964872 |
| 205255_x_at | 0.287714327 | 6.405792895 | 2.79E-08    | 9.41E-07    |
| 205256_at   | 0.024685331 | 0.751671061 | 0.455259043 | 0.634240559 |
| 205257_s_at | -0.51792567 | -4.99021104 | 5.72E-06    | 6.72E-05    |
| 205258_at   | 0.522465788 | 6.24561319  | 5.17E-08    | 1.51E-06    |
| 205259_at   | 0.192510512 | 3.149623379 | 0.002573837 | 0.011276336 |
| 205260_s_at | -0.09159429 | -1.56752297 | 0.122380172 | 0.253354393 |
| 205261_at   | 0.041954108 | 0.983360674 | 0.329475014 | 0.511938857 |
| 205262_at   | -0.51920455 | -8.1722029  | 2.95E-11    | 1.08E-08    |
| 205263_at   | 0.130837023 | 3.730918947 | 0.000433003 | 0.002535277 |
| 205264_at   | -0.01358692 | -0.41132067 | 0.682338731 | 0.810026896 |
| 205265_s_at | -0.10849745 | -3.47233209 | 0.000976296 | 0.004996291 |
| 205266_at   | 0.021357956 | 0.45369265  | 0.651726794 | 0.788899918 |
| 205267_at   | 0.158903621 | 4.958385095 | 6.42E-06    | 7.41E-05    |
| 205268_s_at | -0.72888298 | -7.19675191 | 1.30E-09    | 1.12E-07    |
| 205269_at   | 0.075381932 | 1.996230598 | 0.050564887 | 0.128579126 |
| 205270_s_at | 0.073569258 | 1.315945059 | 0.193320223 | 0.353224342 |
| 205271_s_at | -0.16778394 | -5.684825   | 4.37E-07    | 8.15E-06    |
| 205272_s_at | -0.02745708 | -0.55492209 | 0.581061234 | 0.737168231 |



|             |             |             |             |             |
|-------------|-------------|-------------|-------------|-------------|
| 205273_s_at | -0.15589233 | -2.67885376 | 0.009573848 | 0.03367234  |
| 205274_at   | 0.013081417 | 0.231921591 | 0.817407379 | 0.898006451 |
| 205275_at   | 0.047291661 | 1.828869966 | 0.072512032 | 0.170115892 |
| 205276_s_at | -0.02623196 | -0.56538764 | 0.573969807 | 0.731822967 |
| 205277_at   | -0.31658678 | -4.72577839 | 1.48E-05    | 0.000148142 |
| 205278_at   | -0.99564842 | -4.91449564 | 7.52E-06    | 8.44E-05    |
| 205279_s_at | -0.89619114 | -5.99149231 | 1.37E-07    | 3.22E-06    |
| 205280_at   | -0.81600456 | -5.98757988 | 1.39E-07    | 3.26E-06    |
| 205281_s_at | 0.202638797 | 4.275564361 | 7.12E-05    | 0.000553821 |
| 205282_at   | 0.041122198 | 1.281720822 | 0.204991685 | 0.368179534 |
| 205283_at   | -0.07307352 | -2.03059032 | 0.046845119 | 0.121227681 |
| 205284_at   | 0.086125958 | 1.944580846 | 0.056632818 | 0.140636435 |
| 205285_s_at | -0.03264357 | -0.79714965 | 0.428584107 | 0.60979136  |
| 205286_at   | 0.01359528  | 0.510813972 | 0.611401535 | 0.760204535 |
| 205287_s_at | 0.050734883 | 1.09937192  | 0.276104558 | 0.452554504 |
| 205288_at   | 0.087183143 | 3.379694452 | 0.001296446 | 0.006337115 |
| 205289_at   | 0.036131493 | 1.173160128 | 0.245480902 | 0.416842544 |
| 205290_s_at | 0.127985802 | 2.433311278 | 0.018033447 | 0.056677271 |
| 205291_at   | -0.02144283 | -0.51996002 | 0.605051338 | 0.755207351 |
| 205292_s_at | 0.190381784 | 2.899375779 | 0.005255943 | 0.020527712 |
| 205293_x_at | -0.64482608 | -6.42527039 | 2.59E-08    | 8.91E-07    |
| 205294_at   | -0.74965318 | -7.59379478 | 2.78E-10    | 4.04E-08    |
| 205295_at   | 0.030006565 | 0.771198993 | 0.443689361 | 0.623874357 |
| 205296_at   | 0.05209715  | 2.927726568 | 0.004856027 | 0.019262052 |
| 205297_s_at | -0.02300469 | -0.48221408 | 0.631451206 | 0.775020386 |
| 205298_s_at | 0.080066237 | 2.038246707 | 0.04604918  | 0.11970162  |
| 205299_s_at | -0.04090208 | -1.44116282 | 0.154864245 | 0.301076086 |
| 205300_s_at | 0.199533138 | 3.932793171 | 0.000224882 | 0.001457854 |
| 205301_s_at | -0.0487281  | -1.05086113 | 0.297639238 | 0.47672012  |
| 205302_at   | 0.032178587 | 1.579063843 | 0.119707821 | 0.249056466 |
| 205303_at   | 0.310946836 | 5.017680666 | 5.18E-06    | 6.19E-05    |
| 205304_s_at | 0.049656184 | 0.936182347 | 0.353023731 | 0.53615002  |
| 205305_at   | 0.037945627 | 1.152321299 | 0.253871028 | 0.426958831 |
| 205306_x_at | -0.03192592 | -0.54801044 | 0.585767495 | 0.740937097 |
| 205307_s_at | 0.003489391 | 0.143192936 | 0.886629343 | 0.939238898 |
| 205308_at   | 0.018543332 | 0.374706615 | 0.709232103 | 0.828983187 |
| 205309_at   | -0.04097044 | -1.29483113 | 0.200460042 | 0.362446807 |
| 205310_at   | 0.026682527 | 0.652316222 | 0.516749371 | 0.686418871 |
| 205311_at   | -0.32731207 | -5.42597358 | 1.15E-06    | 1.79E-05    |
| 205312_at   | 0.062705479 | 1.48156077  | 0.143817811 | 0.28550196  |
| 205313_at   | -0.03248628 | -0.62102326 | 0.536993905 | 0.703134721 |
| 205314_x_at | -0.04430601 | -1.05405595 | 0.296186514 | 0.475114594 |
| 205315_s_at | 0.161813904 | 2.780949999 | 0.007278654 | 0.026892989 |
| 205316_at   | 0.196065407 | 1.855860505 | 0.068507084 | 0.163065541 |
| 205317_s_at | 0.073031667 | 1.435982261 | 0.15632742  | 0.303020076 |
| 205318_at   | -0.42633623 | -6.77916373 | 6.60E-09    | 3.37E-07    |
| 205319_at   | 0.014461429 | 0.417043683 | 0.678171201 | 0.80707321  |
| 205320_at   | 0.051562717 | 0.893512162 | 0.375240004 | 0.558311435 |
| 205321_at   | -0.02075622 | -0.27233483 | 0.786322437 | 0.878198853 |
| 205322_s_at | 0.177879908 | 4.967546491 | 6.21E-06    | 7.20E-05    |
| 205323_s_at | 0.236090429 | 6.552139432 | 1.59E-08    | 6.27E-07    |
| 205324_s_at | -0.26546588 | -4.38977651 | 4.81E-05    | 0.000398438 |
| 205325_at   | -1.00001006 | -6.7546119  | 7.26E-09    | 3.58E-07    |
| 205326_at   | 0.256246826 | 3.450955001 | 0.001042714 | 0.00527638  |
| 205327_s_at | -0.01837456 | -0.57381503 | 0.568290163 | 0.727653678 |
| 205328_at   | -0.04298652 | -0.51399299 | 0.609190879 | 0.758488891 |
| 205329_s_at | -0.03301405 | -0.71606739 | 0.476795285 | 0.652527404 |
| 205330_at   | -0.81463653 | -7.82481518 | 1.13E-10    | 2.24E-08    |
| 205331_s_at | -0.10976221 | -2.83736805 | 0.006239179 | 0.023668738 |
| 205332_at   | -0.014399   | -0.25856499 | 0.796877457 | 0.884733128 |
| 205333_s_at | -0.06279259 | -1.0883407  | 0.280903172 | 0.458062705 |
| 205334_at   | 0.246785332 | 3.219664644 | 0.00209491  | 0.009474371 |
| 205335_s_at | -0.15802625 | -2.29200925 | 0.025517105 | 0.074930866 |
| 205336_at   | 0.008021102 | 0.208905087 | 0.835247233 | 0.909029038 |
| 205337_at   | -0.08025331 | -2.89819112 | 0.0052733   | 0.020588305 |
| 205338_s_at | -0.04393046 | -0.93418986 | 0.354041749 | 0.537204925 |
| 205339_at   | -0.02437783 | -1.06128776 | 0.292916122 | 0.471442211 |
| 205340_at   | -0.17305816 | -3.85188006 | 0.000293016 | 0.00182541  |
| 205341_at   | -0.02064686 | -0.410093   | 0.68323403  | 0.810594512 |
| 205342_s_at | 0.032069519 | 0.760226967 | 0.450168619 | 0.629602125 |
| 205343_at   | -0.03410582 | -1.03477597 | 0.305027488 | 0.484996745 |
| 205344_at   | -0.37841168 | -5.20339983 | 2.63E-06    | 3.54E-05    |
| 205345_at   | 0.415308819 | 6.663154437 | 1.03E-08    | 4.59E-07    |
| 205346_at   | -0.16818308 | -4.7067546  | 1.58E-05    | 0.000157384 |
| 205347_s_at | 0.008787502 | 0.287770106 | 0.774538597 | 0.870961702 |

|             |             |             |             |             |
|-------------|-------------|-------------|-------------|-------------|
| 205348_s_at | -0.84057397 | -6.594046   | 1.35E-08    | 5.59E-07    |
| 205349_at   | 0.11174758  | 2.666252784 | 0.009898982 | 0.034598052 |
| 205350_at   | -0.15930026 | -1.56124816 | 0.123853085 | 0.255669381 |
| 205351_at   | -0.03941016 | -0.84435405 | 0.401907508 | 0.584255007 |
| 205352_at   | -0.62379857 | -5.2274609  | 2.40E-06    | 3.29E-05    |
| 205353_s_at | -0.02718661 | -0.49874831 | 0.619824847 | 0.766667001 |
| 205354_at   | -0.02676874 | -0.61449018 | 0.541271444 | 0.706580891 |
| 205355_at   | 0.003848757 | 0.163253945 | 0.870880532 | 0.930243612 |
| 205356_at   | 0.003312208 | 0.082993778 | 0.934139502 | 0.965731266 |
| 205357_s_at | 0.037644883 | 1.50285145  | 0.138250686 | 0.277444979 |
| 205358_at   | -0.60718544 | -5.61251688 | 5.73E-07    | 1.01E-05    |
| 205359_at   | -0.26345767 | -5.95450367 | 1.57E-07    | 3.58E-06    |
| 205360_at   | 0.047743396 | 1.347388324 | 0.183045018 | 0.339967915 |
| 205361_s_at | -0.25335212 | -2.77302522 | 0.007436811 | 0.027366484 |
| 205362_s_at | -0.091778   | -2.90307162 | 0.005202133 | 0.020350836 |
| 205363_at   | 0.806490067 | 5.450330587 | 1.05E-06    | 1.66E-05    |
| 205364_at   | 0.147778113 | 3.339109966 | 0.00146602  | 0.007030727 |
| 205365_at   | -0.04722466 | -1.14081396 | 0.25859093  | 0.432536616 |
| 205366_s_at | 0.003562664 | 0.109439255 | 0.913228226 | 0.953997126 |
| 205367_at   | 0.220602241 | 3.675234947 | 0.000517177 | 0.002946721 |
| 205368_at   | -0.23763352 | -3.88302328 | 0.000264723 | 0.001672227 |
| 205369_x_at | -0.09236591 | -2.72700507 | 0.008419414 | 0.030342749 |
| 205370_x_at | 0.380692319 | 6.470051516 | 2.18E-08    | 7.86E-07    |
| 205371_s_at | -0.03874761 | -1.70724087 | 0.093074193 | 0.206189742 |
| 205372_at   | 0.098339713 | 3.446340775 | 0.001057603 | 0.005337818 |
| 205373_at   | 0.024537049 | 0.279188069 | 0.781084049 | 0.874943022 |
| 205374_at   | 0.028346217 | 0.654086558 | 0.515616317 | 0.685800067 |
| 205375_at   | 0.013657789 | 0.265176494 | 0.791804637 | 0.881400106 |
| 205376_at   | -0.23956989 | -5.392139   | 1.31E-06    | 1.98E-05    |
| 205377_s_at | -0.38856572 | -4.98090319 | 5.92E-06    | 6.91E-05    |
| 205378_s_at | -0.46445727 | -4.85192925 | 9.43E-06    | 0.000101755 |
| 205379_at   | -0.13749495 | -1.76462918 | 0.08284026  | 0.188546922 |
| 205380_at   | -0.0390364  | -1.73831889 | 0.087409839 | 0.196653437 |
| 205381_at   | 0.007924071 | 0.162400606 | 0.87154942  | 0.930713405 |
| 205382_s_at | -0.04241238 | -0.9466921  | 0.347685461 | 0.530713433 |
| 205383_s_at | 0.575821328 | 7.403025419 | 5.84E-10    | 6.53E-08    |
| 205384_at   | 0.494815933 | 5.050285078 | 4.60E-06    | 5.64E-05    |
| 205385_at   | -0.01897804 | -0.60842492 | 0.545258244 | 0.709373364 |
| 205386_s_at | 0.003132894 | 0.118707653 | 0.905913202 | 0.950177724 |
| 205387_s_at | -0.00034637 | -0.00665006 | 0.994716663 | 0.997475324 |
| 205388_at   | -0.21349679 | -3.4826766  | 0.000945617 | 0.004864356 |
| 205389_s_at | 0.003124433 | 0.104399959 | 0.917208667 | 0.956079062 |
| 205390_s_at | -0.01724741 | -0.48823578 | 0.62720589  | 0.771865999 |
| 205391_x_at | -0.02045705 | -0.43071178 | 0.668258981 | 0.800102202 |
| 205392_s_at | -0.0053441  | -0.08779605 | 0.930338288 | 0.963696344 |
| 205393_s_at | -0.01776515 | -0.90510065 | 0.369120475 | 0.552358275 |
| 205394_at   | -0.02217126 | -1.0624971  | 0.292371666 | 0.470840579 |
| 205395_s_at | 0.054292907 | 1.266091379 | 0.210493386 | 0.375199234 |
| 205396_at   | -0.12864755 | -2.98539535 | 0.004128213 | 0.016829162 |
| 205397_x_at | -0.05317235 | -1.35387006 | 0.180979438 | 0.337371203 |
| 205398_s_at | -0.17642489 | -4.47902888 | 3.53E-05    | 0.000308486 |
| 205399_at   | -0.72065637 | -5.78599185 | 2.98E-07    | 5.96E-06    |
| 205400_at   | 0.028094742 | 0.618117955 | 0.538894004 | 0.704943086 |
| 205401_at   | -0.07445607 | -1.39580596 | 0.168042225 | 0.31977106  |
| 205402_x_at | -0.0621204  | -1.57668679 | 0.120254372 | 0.249925985 |
| 205403_at   | 0.060493909 | 1.351829263 | 0.18162787  | 0.338193182 |
| 205404_at   | 0.046003369 | 0.573973789 | 0.568183435 | 0.727537865 |
| 205405_at   | 0.021700606 | 0.453794164 | 0.651654146 | 0.788854712 |
| 205406_s_at | 0.098387581 | 0.913560229 | 0.364693665 | 0.548046041 |
| 205407_at   | 0.087898578 | 1.89443044  | 0.063108819 | 0.153061232 |
| 205408_at   | 0.015855107 | 0.284147484 | 0.777299568 | 0.872311137 |
| 205409_at   | -0.07210758 | -1.46574986 | 0.148065034 | 0.291524848 |
| 205410_s_at | 0.083341873 | 2.110554318 | 0.039091221 | 0.104883594 |
| 205411_at   | -0.04623958 | -1.42668076 | 0.15898146  | 0.306880292 |
| 205412_at   | 0.055316598 | 0.749527908 | 0.456539322 | 0.635469001 |
| 205413_at   | -0.79542701 | -6.22174065 | 5.67E-08    | 1.62E-06    |
| 205414_s_at | -0.5324518  | -5.27802043 | 1.99E-06    | 2.83E-05    |
| 205415_s_at | 0.026875872 | 0.643311804 | 0.522532821 | 0.691388721 |
| 205416_s_at | 0.019961855 | 0.761525267 | 0.449399083 | 0.628821033 |
| 205417_s_at | 0.470135493 | 7.875051495 | 9.33E-11    | 2.01E-08    |
| 205418_at   | 0.054281277 | 1.458785763 | 0.149966683 | 0.294185155 |
| 205419_at   | 0.083775492 | 1.461561052 | 0.149206572 | 0.293075203 |
| 205420_at   | 0.027513592 | 0.668078359 | 0.506707991 | 0.678216663 |
| 205421_at   | 0.006982843 | 0.490710244 | 0.625465037 | 0.770487415 |
| 205422_s_at | -0.00210921 | -0.07602841 | 0.93965562  | 0.968432086 |

|             |              |             |             |             |
|-------------|--------------|-------------|-------------|-------------|
| 205423_at   | 0.021797519  | 0.491230494 | 0.625099299 | 0.770249183 |
| 205424_at   | -0.07250228  | -1.22183351 | 0.226665769 | 0.394169126 |
| 205425_at   | 0.040834641  | 0.64531481  | 0.521243366 | 0.690132085 |
| 205426_s_at | 0.015275108  | 0.284392022 | 0.777113103 | 0.87230287  |
| 205427_at   | 0.047289572  | 1.397808071 | 0.167442858 | 0.319011501 |
| 205428_s_at | -0.07527158  | -0.85441305 | 0.396357707 | 0.578946257 |
| 205429_s_at | -0.0686415   | -2.22167013 | 0.030183448 | 0.085507014 |
| 205430_at   | 0.025506737  | 1.445902854 | 0.153534858 | 0.299166648 |
| 205431_s_at | 0.013673593  | 0.407247874 | 0.685310641 | 0.812001993 |
| 205432_at   | -0.05206289  | -1.12504969 | 0.265157647 | 0.440192621 |
| 205433_at   | -0.04925583  | -0.60987184 | 0.544305804 | 0.708721889 |
| 205434_s_at | -0.02536418  | -0.36235138 | 0.718393773 | 0.835222761 |
| 205435_s_at | 0.011181241  | 0.280986641 | 0.779710956 | 0.87403351  |
| 205436_s_at | 0.304965361  | 4.288757707 | 6.81E-05    | 0.000532451 |
| 205437_at   | 0.139712346  | 4.474452332 | 3.59E-05    | 0.000312284 |
| 205438_at   | 0.042356832  | 0.945086671 | 0.348497491 | 0.531571668 |
| 205439_at   | 0.139685133  | 1.391921321 | 0.169209872 | 0.321308957 |
| 205440_s_at | -0.71712203  | -5.87655971 | 2.12E-07    | 4.52E-06    |
| 205441_at   | 0.120230281  | 3.736344256 | 0.000425542 | 0.002497483 |
| 205442_at   | 0.29265677   | 2.532076714 | 0.014041766 | 0.045991545 |
| 205443_at   | 0.184025879  | 4.519811769 | 3.06E-05    | 0.000272882 |
| 205444_at   | 0.02550662   | 0.687216949 | 0.494658456 | 0.668176139 |
| 205445_at   | -0.0371703   | -0.80142473 | 0.426125443 | 0.607438067 |
| 205446_s_at | -0.1323476   | -3.22351682 | 0.002071168 | 0.009384089 |
| 205447_s_at | -0.1043729   | -2.87251716 | 0.005662757 | 0.021826644 |
| 205448_s_at | -0.02217195  | -0.78218103 | 0.437259232 | 0.61779178  |
| 205449_at   | 0.022712871  | 0.335548945 | 0.738410093 | 0.848224538 |
| 205450_at   | 0.099291822  | 2.257670939 | 0.027708628 | 0.079854789 |
| 205451_at   | 0.072809058  | 0.93562465  | 0.353308483 | 0.536493026 |
| 205452_at   | -0.18531428  | -4.95436294 | 6.51E-06    | 7.51E-05    |
| 205453_at   | 0.03400857   | 0.717731657 | 0.475775998 | 0.651711187 |
| 205454_at   | -1.3393414   | -7.12416074 | 1.73E-09    | 1.32E-07    |
| 205455_at   | -0.00055241  | -0.01088148 | 0.991354991 | 0.99594751  |
| 205456_at   | -0.02172226  | -0.43240468 | 0.667035354 | 0.799505029 |
| 205457_at   | -0.03743514  | -1.30648491 | 0.196495194 | 0.357258175 |
| 205458_at   | -0.0286414   | -0.54941008 | 0.584812988 | 0.740283863 |
| 205459_s_at | -0.27340196  | -6.12162083 | 8.31E-08    | 2.18E-06    |
| 205460_at   | -0.25741795  | -5.76648966 | 3.21E-07    | 6.32E-06    |
| 205461_at   | -0.05430731  | -1.46019296 | 0.149580893 | 0.293629784 |
| 205462_s_at | 0.045907701  | 0.68285696  | 0.497389588 | 0.670547961 |
| 205463_s_at | 0.357564966  | 4.754538482 | 1.34E-05    | 0.00013575  |
| 205464_at   | -0.0103696   | -0.27359737 | 0.785356635 | 0.877544784 |
| 205465_x_at | -0.03498058  | -0.79430109 | 0.430227046 | 0.611082382 |
| 205466_s_at | 0.007061493  | 0.269304453 | 0.788641937 | 0.879415421 |
| 205467_at   | 0.02185149   | 0.533059611 | 0.596009383 | 0.748701972 |
| 205468_s_at | 0.024186565  | 0.549565981 | 0.584706716 | 0.740245827 |
| 205469_s_at | 0.014125366  | 0.340228039 | 0.734902109 | 0.845672925 |
| 205470_s_at | 0.029472104  | 0.627603404 | 0.532703245 | 0.699658878 |
| 205471_s_at | -0.91719891  | -7.70807856 | 1.78E-10    | 3.02E-08    |
| 205472_s_at | -0.48249082  | -4.39389321 | 4.74E-05    | 0.00039383  |
| 205473_at   | -0.01546401  | -0.50000339 | 0.618946228 | 0.766046658 |
| 205474_at   | 0.153194937  | 4.161819774 | 0.000104836 | 0.000766454 |
| 205475_at   | 0.284274659  | 2.420361408 | 0.018626311 | 0.058141889 |
| 205476_at   | 0.084731057  | 1.07035413  | 0.288851348 | 0.467074226 |
| 205477_s_at | 0.040317099  | 1.241667755 | 0.21930896  | 0.386108176 |
| 205478_at   | -1.15296242  | -8.94683748 | 1.49E-12    | 2.67E-09    |
| 205479_s_at | 0.02209679   | 0.518499554 | 0.606063321 | 0.755942673 |
| 205480_s_at | -0.69041512  | -7.18832145 | 1.35E-09    | 1.14E-07    |
| 205481_at   | 0.010163426  | 0.152387825 | 0.879404836 | 0.93528059  |
| 205482_x_at | -0.11041845  | -2.68808657 | 0.009341852 | 0.033030543 |
| 205483_s_at | -2.87E-05    | -0.00030633 | 0.999756626 | 0.999822772 |
| 205484_at   | -0.00567011  | -0.11801357 | 0.906460724 | 0.950350537 |
| 205485_at   | 0.564408758  | 6.013812149 | 1.25E-07    | 3.02E-06    |
| 205486_at   | 0.229926883  | 4.259728634 | 7.52E-05    | 0.000580547 |
| 205487_s_at | 0.006329522  | 0.139959304 | 0.889172369 | 0.940654535 |
| 205488_at   | 0.007954624  | 0.195778159 | 0.845461501 | 0.91518297  |
| 205489_at   | -1.28868181  | -6.31781565 | 3.92E-08    | 1.22E-06    |
| 205490_x_at | 0.072033152  | 1.801350526 | 0.076796052 | 0.177823386 |
| 205491_s_at | -0.02298539  | -0.53175461 | 0.596907316 | 0.749405753 |
| 205492_s_at | -0.2444913   | -5.45678316 | 1.03E-06    | 1.63E-05    |
| 205493_s_at | -0.511197848 | -5.28725436 | 1.93E-06    | 2.75E-05    |
| 205494_at   | -0.01800813  | -0.53905769 | 0.591890416 | 0.745589404 |
| 205495_s_at | 0.00352995   | 0.067812076 | 0.946166214 | 0.972249797 |
| 205496_at   | -0.13692692  | -3.96473578 | 0.000202424 | 0.001330208 |
| 205497_at   | 0.077860919  | 2.210125811 | 0.0310173   | 0.087436936 |

|             |             |             |             |             |
|-------------|-------------|-------------|-------------|-------------|
| 205498_at   | 0.008969381 | 0.332956739 | 0.740355919 | 0.849322859 |
| 205499_at   | 0.042853485 | 1.245367403 | 0.217956384 | 0.384377979 |
| 205500_at   | 0.069150587 | 1.698909459 | 0.094643047 | 0.208775275 |
| 205501_at   | -2.20803954 | -7.94521373 | 7.10E-11    | 1.74E-08    |
| 205502_at   | 0.045914854 | 0.89355065  | 0.375219574 | 0.558311435 |
| 205503_at   | 0.040270194 | 1.068190007 | 0.289818041 | 0.468039609 |
| 205504_at   | 0.022707823 | 0.402474046 | 0.688800456 | 0.814641259 |
| 205505_at   | 0.00948983  | 0.340722046 | 0.734532074 | 0.845464805 |
| 205506_at   | -0.06199939 | -1.53725915 | 0.129615363 | 0.264630874 |
| 205507_at   | 0.065811733 | 1.3709304   | 0.175627586 | 0.330170701 |
| 205508_at   | -0.2823896  | -5.08979704 | 3.98E-06    | 4.99E-05    |
| 205509_at   | 0.051229281 | 1.013523576 | 0.314979108 | 0.496265468 |
| 205510_s_at | -0.1782999  | -4.97475877 | 6.05E-06    | 7.04E-05    |
| 205511_at   | -0.02180911 | -1.29847465 | 0.199214059 | 0.360730478 |
| 205512_s_at | -0.0904739  | -2.31648337 | 0.024050408 | 0.071509602 |
| 205513_at   | -0.00857139 | -0.16702037 | 0.867929365 | 0.928444781 |
| 205514_at   | 0.033983442 | 0.795782222 | 0.429372317 | 0.610372708 |
| 205515_at   | -0.04072499 | -0.86076123 | 0.392879801 | 0.575672406 |
| 205516_x_at | 0.026749633 | 0.69822533  | 0.487799462 | 0.662115532 |
| 205517_at   | 0.016582297 | 0.624144915 | 0.534956175 | 0.701429781 |
| 205518_s_at | 0.199656756 | 2.890596713 | 0.005385838 | 0.02094541  |
| 205519_at   | 0.018804428 | 0.520506917 | 0.604672587 | 0.754880682 |
| 205520_at   | -0.03817318 | -0.90978676 | 0.366664065 | 0.549786969 |
| 205521_at   | 0.02470058  | 0.743614731 | 0.460082487 | 0.638577027 |
| 205522_at   | 0.086663832 | 1.655869386 | 0.103097364 | 0.222719809 |
| 205523_at   | -0.0847601  | -1.95323696 | 0.055574463 | 0.138608957 |
| 205524_s_at | 0.013922065 | 0.318548945 | 0.751201819 | 0.856870139 |
| 205525_at   | 0.317214295 | 5.261208286 | 2.12E-06    | 2.97E-05    |
| 205526_s_at | 0.323247309 | 6.132569351 | 7.97E-08    | 2.11E-06    |
| 205527_s_at | 0.076375196 | 1.85789055  | 0.068213549 | 0.162522652 |
| 205528_s_at | -0.31616182 | -5.63559812 | 5.26E-07    | 9.45E-06    |
| 205529_s_at | -0.1648926  | -2.22183008 | 0.030172035 | 0.08549636  |
| 205530_at   | 0.156461355 | 3.240465063 | 0.001969687 | 0.008992669 |
| 205531_s_at | -0.47910212 | -6.34797723 | 3.49E-08    | 1.12E-06    |
| 205532_s_at | -0.08086612 | -2.62120419 | 0.011145533 | 0.038082274 |
| 205533_s_at | -0.09832049 | -3.52980477 | 0.000817079 | 0.004304713 |
| 205534_at   | -0.01522059 | -0.41982384 | 0.676150307 | 0.805547664 |
| 205535_s_at | -0.12859149 | -5.23341861 | 2.35E-06    | 3.23E-05    |
| 205536_at   | -0.02977434 | -0.94547818 | 0.348299353 | 0.531378258 |
| 205537_s_at | 0.02004205  | 0.388515804 | 0.699043163 | 0.821932046 |
| 205538_at   | 0.019542468 | 0.731988578 | 0.467094679 | 0.64438188  |
| 205539_at   | -0.08277281 | -1.62486142 | 0.109562235 | 0.233235944 |
| 205540_s_at | -0.12129247 | -2.6036322  | 0.011669379 | 0.039548639 |
| 205541_s_at | -0.2920518  | -4.05321185 | 0.000150933 | 0.001039093 |
| 205542_at   | 0.004565409 | 0.157676494 | 0.8752541   | 0.933023364 |
| 205543_at   | -0.14677957 | -1.77289253 | 0.081446719 | 0.186247276 |
| 205544_s_at | 0.023678078 | 0.847229846 | 0.400315998 | 0.582763137 |
| 205545_x_at | 0.039854741 | 1.003928529 | 0.31954302  | 0.501088303 |
| 205546_s_at | 0.200721071 | 4.852473585 | 9.41E-06    | 0.000101581 |
| 205547_s_at | 0.670580362 | 4.661319234 | 1.86E-05    | 0.000179672 |
| 205548_s_at | -0.13327804 | -1.67193824 | 0.099871559 | 0.217398229 |
| 205549_at   | -1.21823449 | -7.55920547 | 3.18E-10    | 4.42E-08    |
| 205550_s_at | -0.15466397 | -4.37817038 | 5.01E-05    | 0.000412289 |
| 205551_at   | -0.60203936 | -5.22490077 | 2.43E-06    | 3.31E-05    |
| 205552_s_at | -0.03298811 | -0.87603898 | 0.38458784  | 0.567185842 |
| 205553_s_at | 0.07503041  | 1.671985485 | 0.099862198 | 0.217391201 |
| 205554_s_at | -0.00886476 | -0.19728089 | 0.844290818 | 0.914393854 |
| 205555_s_at | -0.0088768  | -0.3080556  | 0.759132999 | 0.861347428 |
| 205556_at   | -0.00966698 | -0.45226942 | 0.652745677 | 0.789463496 |
| 205557_at   | -0.0101171  | -0.30977262 | 0.75783342  | 0.860754736 |
| 205558_at   | 0.065964913 | 1.65428899  | 0.103419167 | 0.223296265 |
| 205559_s_at | 0.323126821 | 6.561091929 | 1.53E-08    | 6.12E-07    |
| 205560_at   | 0.01444044  | 0.545356205 | 0.587579616 | 0.742398174 |
| 205561_at   | -0.3322108  | -5.95287484 | 1.58E-07    | 3.59E-06    |
| 205562_at   | 0.035813712 | 0.976464246 | 0.332850677 | 0.51549927  |
| 205563_at   | 0.002685366 | 0.071096519 | 0.943563165 | 0.970855038 |
| 205564_at   | 0.011798514 | 0.311780108 | 0.75631488  | 0.859779462 |
| 205565_s_at | -0.02650684 | -0.96382827 | 0.339094959 | 0.521968448 |
| 205566_at   | 0.008648675 | 0.230644426 | 0.818394851 | 0.898687994 |
| 205567_at   | -0.2463891  | -3.26108428 | 0.001852535 | 0.008562775 |
| 205568_at   | -0.0386953  | -0.75144862 | 0.455391828 | 0.634306912 |
| 205569_at   | 0.033053529 | 0.692735625 | 0.491213338 | 0.665413025 |
| 205570_at   | 0.296339033 | 4.643002266 | 1.99E-05    | 0.000189936 |
| 205571_at   | 0.204876348 | 3.190576145 | 0.002282632 | 0.010183638 |
| 205572_at   | 0.077287472 | 1.056363609 | 0.295140225 | 0.473997662 |

|             |             |             |             |             |
|-------------|-------------|-------------|-------------|-------------|
| 205573_s_at | 0.568289042 | 5.292073836 | 1.89E-06    | 2.71E-05    |
| 205574_x_at | 0.00341424  | 0.068016329 | 0.946004319 | 0.972150495 |
| 205575_at   | 0.045016416 | 0.840204572 | 0.404210748 | 0.58645929  |
| 205576_at   | -0.08678948 | -2.13276697 | 0.037146292 | 0.100846925 |
| 205577_at   | 0.23932058  | 2.029714767 | 0.046936891 | 0.121415959 |
| 205578_at   | 0.002269385 | 0.064544513 | 0.948756471 | 0.973702533 |
| 205579_at   | 0.094400744 | 1.831837377 | 0.072062309 | 0.169416554 |
| 205580_s_at | 0.008853137 | 0.182642703 | 0.855709146 | 0.920949602 |
| 205581_s_at | 0.116811614 | 1.857163342 | 0.068318577 | 0.162738187 |
| 205582_s_at | 0.201883761 | 3.58660425  | 0.000684211 | 0.003725028 |
| 205583_s_at | 0.052132669 | 0.747873159 | 0.457529256 | 0.636272755 |
| 205584_at   | -0.02553428 | -0.84037412 | 0.404116479 | 0.586388348 |
| 205585_at   | 0.053020637 | 1.610531104 | 0.112659112 | 0.238127177 |
| 205586_x_at | -0.21145202 | -3.73878927 | 0.00042222  | 0.002480919 |
| 205587_at   | -0.03102431 | -0.74233147 | 0.460853496 | 0.639185192 |
| 205588_s_at | 0.035461975 | 1.208548735 | 0.231693263 | 0.400063182 |
| 205589_at   | 0.062915057 | 2.197639052 | 0.031941993 | 0.089552197 |
| 205590_at   | -1.08967846 | -7.30212609 | 8.65E-10    | 8.56E-08    |
| 205591_at   | -0.55046613 | -4.21543886 | 8.74E-05    | 0.000657605 |
| 205592_at   | 0.01262235  | 0.258840428 | 0.796665942 | 0.884564216 |
| 205593_s_at | -0.08442292 | -1.52590245 | 0.13241679  | 0.268774119 |
| 205594_at   | 0.511274953 | 5.618707265 | 5.60E-07    | 9.92E-06    |
| 205595_at   | 0.015851991 | 0.382276694 | 0.703639864 | 0.825230872 |
| 205596_s_at | 0.229128191 | 2.532974283 | 0.014009483 | 0.045912722 |
| 205597_at   | -0.00719467 | -0.19887978 | 0.843045607 | 0.913745799 |
| 205598_at   | 0.043365013 | 1.36623106  | 0.177089549 | 0.332094919 |
| 205599_at   | 0.145509452 | 2.937195241 | 0.004728879 | 0.018841078 |
| 205600_x_at | -0.00789779 | -0.19232461 | 0.848153271 | 0.916497983 |
| 205601_s_at | 0.094287942 | 2.875022464 | 0.005623613 | 0.021703845 |
| 205602_x_at | 0.00602618  | 0.134757872 | 0.893265376 | 0.942931082 |
| 205603_s_at | -0.34847086 | -4.78801907 | 1.19E-05    | 0.000122767 |
| 205604_at   | 0.032113945 | 0.86581067  | 0.39012701  | 0.573066765 |
| 205605_at   | 0.015436231 | 0.299046972 | 0.76596282  | 0.865569556 |
| 205606_at   | 0.102202005 | 2.270798646 | 0.026851867 | 0.077926209 |
| 205607_s_at | 0.091880526 | 2.912082332 | 0.005073072 | 0.019945961 |
| 205608_s_at | 0.397003705 | 6.19262612  | 6.33E-08    | 1.77E-06    |
| 205609_at   | 0.371647253 | 4.675810967 | 1.77E-05    | 0.000171832 |
| 205610_at   | 0.13370494  | 3.636776973 | 0.000584213 | 0.003267424 |
| 205611_at   | 0.105418605 | 2.125806891 | 0.037746421 | 0.10217207  |
| 205612_at   | -0.00785405 | -0.28121198 | 0.779538976 | 0.873906484 |
| 205613_at   | 0.509835346 | 7.291598101 | 9.01E-10    | 8.80E-08    |
| 205614_x_at | 0.124564613 | 3.646739429 | 0.000566092 | 0.003181563 |
| 205615_at   | 0.01331463  | 0.611636687 | 0.543145234 | 0.707765892 |
| 205616_at   | 0.152572801 | 2.740428568 | 0.008121151 | 0.029449251 |
| 205617_at   | -0.01785825 | -0.38164805 | 0.704103638 | 0.825536486 |
| 205618_at   | 0.227008648 | 2.338384829 | 0.022801964 | 0.068480973 |
| 205619_s_at | 0.016116054 | 0.816738511 | 0.417387788 | 0.599765128 |
| 205620_at   | -0.02493344 | -0.4326858  | 0.666832251 | 0.799456009 |
| 205621_at   | 0.03304774  | -0.99114385 | 0.325692725 | 0.507862925 |
| 205622_at   | 0.116718979 | 2.978085285 | 0.004214497 | 0.017130341 |
| 205623_at   | 0.0479306   | 0.935403734 | 0.353421321 | 0.536573213 |
| 205624_at   | 0.004811384 | 0.118185133 | 0.906325386 | 0.950319277 |
| 205625_s_at | -1.94136179 | -7.29053237 | 9.05E-10    | 8.81E-08    |
| 205626_s_at | -1.97724087 | -6.33744958 | 3.63E-08    | 1.15E-06    |
| 205627_at   | 0.054460765 | 0.968527894 | 0.33676361  | 0.519507068 |
| 205628_at   | 0.015386805 | 0.903682565 | 0.369865888 | 0.553029316 |
| 205629_s_at | -0.07769609 | -1.48960623 | 0.141693687 | 0.282452018 |
| 205630_at   | -0.2378066  | -3.22027109 | 0.002091156 | 0.009460263 |
| 205631_at   | 0.012269051 | 0.349572934 | 0.727913128 | 0.84120429  |
| 205632_s_at | -0.14724302 | -1.77672433 | 0.080807173 | 0.185093562 |
| 205633_s_at | -0.30990974 | -4.37371666 | 5.09E-05    | 0.000417744 |
| 205634_x_at | -0.05784725 | -1.37456208 | 0.17450411  | 0.328607758 |
| 205635_at   | -0.49847021 | -5.48918817 | 9.10E-07    | 1.48E-05    |
| 205636_at   | -0.00136099 | -0.03330071 | 0.973548024 | 0.986596256 |
| 205637_s_at | -0.02109216 | -0.21989543 | 0.826717269 | 0.903866865 |
| 205638_at   | -0.70151946 | -5.80258888 | 2.80E-07    | 5.64E-06    |
| 205639_at   | -0.15410339 | -3.40534655 | 0.001199026 | 0.005932346 |
| 205640_at   | 0.031161494 | 0.705680083 | 0.483184684 | 0.658228119 |
| 205641_s_at | 0.06623452  | 1.259131514 | 0.212978293 | 0.378272383 |
| 205642_at   | 0.070347377 | 1.502131585 | 0.138436095 | 0.277767171 |
| 205643_s_at | -0.05963486 | -1.09748306 | 0.276922125 | 0.453497179 |
| 205644_s_at | 0.293088183 | 2.999724902 | 0.003963824 | 0.016279291 |
| 205645_at   | -0.18257551 | -4.21110835 | 8.87E-05    | 0.000665785 |
| 205646_s_at | 0.642341424 | 6.535849167 | 1.69E-08    | 6.54E-07    |
| 205647_at   | 0.21200022  | 4.719344751 | 1.51E-05    | 0.000151132 |

|             |             |             |             |             |
|-------------|-------------|-------------|-------------|-------------|
| 205648_at   | -0.01309799 | -0.26674965 | 0.79059892  | 0.880725019 |
| 205649_s_at | -0.03109509 | -1.53510077 | 0.130144122 | 0.265436644 |
| 205650_s_at | -0.01300077 | -0.24453804 | 0.807668873 | 0.891864009 |
| 205651_x_at | -0.74915819 | -4.95444977 | 6.51E-06    | 7.51E-05    |
| 205652_s_at | -0.04319661 | -1.04271802 | 0.301364071 | 0.480919138 |
| 205653_at   | 0.024851567 | 0.709791749 | 0.480649846 | 0.655894566 |
| 205654_at   | 0.072652824 | 1.904534742 | 0.061755729 | 0.150432607 |
| 205655_at   | -0.01044637 | -0.45922984 | 0.647769116 | 0.786309705 |
| 205656_at   | 0.17758127  | 2.517839849 | 0.014562925 | 0.047389417 |
| 205657_at   | 0.047871196 | 1.247454082 | 0.217196222 | 0.383391095 |
| 205658_s_at | -0.06196325 | -1.50459846 | 0.137801542 | 0.276767326 |
| 205659_at   | 0.087930539 | 1.99022276  | 0.051240722 | 0.129931935 |
| 205660_at   | 0.037185123 | 0.698492413 | 0.487633707 | 0.661957463 |
| 205661_s_at | -0.09134332 | -2.49501204 | 0.015435155 | 0.049825059 |
| 205662_at   | -0.07213329 | -2.23601438 | 0.029174928 | 0.083267506 |
| 205663_at   | -0.06836755 | -1.7310311  | 0.088711864 | 0.198746066 |
| 205664_at   | 0.053851159 | 1.190348328 | 0.238712198 | 0.40839588  |
| 205665_at   | -0.01296217 | -0.44574903 | 0.657422046 | 0.79265277  |
| 205666_at   | -0.0376371  | -0.88019748 | 0.382349972 | 0.565022813 |
| 205667_at   | 0.02853615  | 0.880550604 | 0.382160317 | 0.564946384 |
| 205668_at   | 0.043375286 | 1.304329779 | 0.197223938 | 0.358189704 |
| 205669_at   | 0.113604292 | 2.890435868 | 0.005388245 | 0.020949234 |
| 205670_at   | 0.074722122 | 1.177492583 | 0.243761903 | 0.414670965 |
| 205671_s_at | -0.00235962 | -0.0568094  | 0.954890404 | 0.976767183 |
| 205672_at   | 0.064310299 | 1.000694258 | 0.321091363 | 0.502951604 |
| 205673_s_at | -0.04025721 | -1.33019228 | 0.188611801 | 0.346847657 |
| 205674_x_at | 0.00124201  | 0.021006402 | 0.983311954 | 0.991856317 |
| 205675_at   | 0.034407275 | 1.086462511 | 0.281725943 | 0.458952243 |
| 205676_at   | 0.010260735 | 0.326725349 | 0.745040437 | 0.852313902 |
| 205677_s_at | 0.03817417  | 0.666949647 | 0.507423532 | 0.678697935 |
| 205678_at   | -0.51182909 | -5.47386258 | 9.64E-07    | 1.55E-05    |
| 205679_x_at | 0.13225177  | 2.760178564 | 0.007699924 | 0.028163107 |
| 205680_at   | -0.03760738 | -1.19389882 | 0.237331011 | 0.406780346 |
| 205681_at   | 0.059168258 | 1.062715511 | 0.292273411 | 0.470729875 |
| 205682_x_at | 0.061919472 | 1.335402785 | 0.186911667 | 0.344827914 |
| 205683_x_at | 0.050167312 | 1.038337784 | 0.303380803 | 0.483203666 |
| 205684_s_at | 0.039376348 | 1.194180644 | 0.237221626 | 0.406608457 |
| 205685_at   | 0.00091318  | -0.0257146  | 0.979572396 | 0.989782043 |
| 205686_s_at | 0.070787937 | 2.551350049 | 0.013363142 | 0.044206183 |
| 205687_at   | -0.02828672 | -0.84440374 | 0.401879975 | 0.5842437   |
| 205688_at   | -0.05378919 | -1.1265954  | 0.264508603 | 0.439408932 |
| 205689_at   | -0.16528535 | -3.47444412 | 0.000969956 | 0.004970294 |
| 205690_s_at | -0.00471036 | -0.0677009  | 0.946254333 | 0.972295635 |
| 205691_at   | -1.00827822 | -5.65970939 | 4.80E-07    | 8.76E-06    |
| 205692_s_at | 0.098208311 | 2.350719142 | 0.022124586 | 0.066840904 |
| 205693_at   | -0.02310152 | -0.48457493 | 0.629785304 | 0.773847047 |
| 205694_at   | -0.00253208 | -0.06086347 | 0.951675164 | 0.975197561 |
| 205695_at   | -0.23694612 | -2.33793043 | 0.022827268 | 0.06854315  |
| 205696_s_at | -0.05460104 | -1.64377187 | 0.105581591 | 0.226785964 |
| 205697_at   | 0.005453278 | 0.102502375 | 0.918708089 | 0.957062018 |
| 205698_s_at | -0.05354868 | -0.98568317 | 0.328343337 | 0.510890939 |
| 205699_at   | 0.011439293 | 0.425790939 | 0.671820903 | 0.802421823 |
| 205700_at   | -0.15830323 | -1.95463027 | 0.055405697 | 0.138290873 |
| 205701_at   | 0.026919697 | 0.798765785 | 0.427653647 | 0.608878522 |
| 205702_at   | 0.001090019 | 0.031554133 | 0.974934911 | 0.98730606  |
| 205703_at   | 0.017420801 | 0.521203074 | 0.604190622 | 0.754702123 |
| 205704_s_at | 0.04471824  | 1.187568445 | 0.239797663 | 0.409669743 |
| 205705_at   | -0.08537914 | -2.26847743 | 0.027001628 | 0.078259194 |
| 205706_s_at | -0.00023982 | -0.00812776 | 0.993542681 | 0.997070502 |
| 205707_at   | -0.23403822 | -4.70330543 | 1.60E-05    | 0.0001589   |
| 205708_s_at | -0.21652098 | -4.12661154 | 0.00011804  | 0.000848416 |
| 205709_s_at | -0.11000951 | -1.61214308 | 0.112307257 | 0.237551987 |
| 205710_at   | 0.116744374 | 1.689745292 | 0.096393752 | 0.211727997 |
| 205711_x_at | -0.38013563 | -5.10433086 | 3.78E-06    | 4.78E-05    |
| 205712_at   | -0.16188541 | -1.86997007 | 0.066488757 | 0.159381866 |
| 205713_s_at | 0.0078053   | 0.211959678 | 0.832874422 | 0.907585977 |
| 205714_s_at | 0.192175797 | 2.326054487 | 0.023497534 | 0.070211391 |
| 205715_at   | 0.010163668 | 0.237794576 | 0.812870384 | 0.894899535 |
| 205716_at   | -0.08816501 | -2.31549802 | 0.024107978 | 0.071642647 |
| 205717_x_at | 0.006949577 | 0.136684645 | 0.891748852 | 0.942019989 |
| 205718_at   | -0.01199448 | -0.25019123 | 0.803315035 | 0.889339729 |
| 205719_s_at | 0.19322783  | 4.579785645 | 2.48E-05    | 0.000229355 |
| 205720_at   | -0.03357057 | -0.59190125 | 0.556194847 | 0.718485999 |
| 205721_at   | 0.070249086 | 1.431747096 | 0.157531553 | 0.304884816 |
| 205722_s_at | -0.01352354 | -0.28550291 | 0.776266191 | 0.871921601 |

|             |              |             |             |             |
|-------------|--------------|-------------|-------------|-------------|
| 205723_at   | -0.0168271   | -0.25209114 | 0.801853199 | 0.888249427 |
| 205724_at   | -0.01680673  | -0.29352825 | 0.770156071 | 0.8684589   |
| 205725_at   | -0.04489969  | -1.05504355 | 0.295738425 | 0.474668627 |
| 205726_at   | -0.85962733  | -7.90250485 | 8.39E-11    | 1.92E-08    |
| 205727_at   | 0.107000947  | 3.03283599  | 0.003607011 | 0.015012528 |
| 205728_at   | -0.32255555  | -4.17734921 | 9.95E-05    | 0.000733395 |
| 205729_at   | 0.07865808   | 1.218646108 | 0.227864672 | 0.395357369 |
| 205730_s_at | 0.061418875  | 1.169851623 | 0.246799486 | 0.418483235 |
| 205731_s_at | 0.0234446637 | 0.350361379 | 0.727324506 | 0.840784947 |
| 205732_s_at | -0.08301489  | -1.999558   | 0.050193887 | 0.127828663 |
| 205733_at   | 0.001413725  | 0.024217151 | 0.980761723 | 0.99031249  |
| 205734_s_at | -0.00984425  | -0.21669922 | 0.82919584  | 0.905232803 |
| 205735_s_at | -0.04267463  | -1.51726059 | 0.134580593 | 0.27207626  |
| 205736_at   | 0.340057605  | 5.269306004 | 2.06E-06    | 2.91E-05    |
| 205737_at   | -1.10074574  | -6.42980538 | 2.55E-08    | 8.79E-07    |
| 205738_s_at | -0.19440009  | -3.44831459 | 0.001051209 | 0.00531422  |
| 205739_x_at | 0.03997953   | 1.584367171 | 0.11849563  | 0.247317362 |
| 205740_s_at | 0.095141051  | 2.168163438 | 0.034221491 | 0.094584221 |
| 205741_s_at | 1.113853018  | 5.190778643 | 2.75E-06    | 3.68E-05    |
| 205742_at   | -0.0109643   | -0.36521442 | 0.716267007 | 0.833788484 |
| 205743_at   | -0.06340818  | -1.06012327 | 0.293441045 | 0.4719981   |
| 205744_at   | -0.01553699  | -0.2687255  | 0.789085294 | 0.879731583 |
| 205745_x_at | 0.139509589  | 3.040581477 | 0.003527983 | 0.014730251 |
| 205746_s_at | -0.0168358   | -0.53163993 | 0.59698626  | 0.749466488 |
| 205747_at   | -0.05652276  | -1.37353577 | 0.174821044 | 0.329028135 |
| 205748_s_at | -0.06625871  | -1.48726899 | 0.14230819  | 0.283310509 |
| 205749_at   | -0.01561915  | -0.34974716 | 0.727783043 | 0.841140959 |
| 205750_at   | 0.017137484  | 0.410822528 | 0.682701956 | 0.810350468 |
| 205751_at   | -0.98189293  | -6.56991806 | 1.48E-08    | 5.97E-07    |
| 205752_s_at | 0.381995812  | 3.130561624 | 0.002720951 | 0.011832737 |
| 205753_at   | 0.044187727  | 0.965970659 | 0.338030866 | 0.520861691 |
| 205754_at   | -0.0654328   | -1.35590958 | 0.180333174 | 0.336567702 |
| 205755_at   | 0.009416741  | 0.242948877 | 0.808893882 | 0.892641432 |
| 205756_s_at | -0.31045235  | -4.63557451 | 2.04E-05    | 0.000194364 |
| 205757_at   | 0.120325917  | 3.50172465  | 0.000891507 | 0.004634012 |
| 205758_at   | -0.17853667  | -3.66711505 | 0.000530688 | 0.003013276 |
| 205759_s_at | -0.02759848  | -0.58283831 | 0.562239654 | 0.723250901 |
| 205760_s_at | 0.062983232  | 1.303142982 | 0.197626111 | 0.35861408  |
| 205761_s_at | -0.02534731  | -0.60847136 | 0.54522766  | 0.709373364 |
| 205762_s_at | -0.02166402  | -0.74537023 | 0.459028948 | 0.637544961 |
| 205763_s_at | 0.004540986  | 0.053465662 | 0.957542849 | 0.978276043 |
| 205764_at   | 0.022161306  | 0.999962277 | 0.32144248  | 0.503279466 |
| 205765_at   | 0.001223414  | 0.041301409 | 0.96719609  | 0.983368466 |
| 205766_at   | 0.041909313  | 0.878509892 | 0.383257147 | 0.565872944 |
| 205767_at   | -0.01604132  | -0.9331166  | 0.354590899 | 0.537691326 |
| 205768_s_at | -0.01408783  | -0.64206732 | 0.523334819 | 0.692081069 |
| 205769_at   | -0.04925486  | -1.62377873 | 0.109793775 | 0.233573087 |
| 205770_at   | -0.15392153  | -4.49661765 | 3.32E-05    | 0.000292073 |
| 205771_s_at | 0.110366335  | 1.918667841 | 0.059904511 | 0.146867762 |
| 205772_s_at | -0.01017949  | -0.2366882  | 0.813724597 | 0.895539897 |
| 205773_at   | 0.28718752   | 3.780493948 | 0.000369242 | 0.002213866 |
| 205774_at   | -0.6281994   | -8.35301463 | 1.46E-11    | 6.68E-09    |
| 205775_at   | -0.16738819  | -3.08674983 | 0.003089469 | 0.013168771 |
| 205776_at   | 0.006401116  | 0.139168688 | 0.889794312 | 0.941008189 |
| 205777_at   | -0.03935012  | -0.75885809 | 0.450980818 | 0.630323827 |
| 205778_at   | -0.04357618  | -0.99169136 | 0.325427753 | 0.507602599 |
| 205779_at   | 0.224908281  | 3.92233406  | 0.000232744 | 0.001501629 |
| 205780_at   | 0.056309119  | 1.71465123  | 0.091696829 | 0.203845345 |
| 205781_at   | 0.078673776  | 1.870703649 | 0.066385209 | 0.159192765 |
| 205782_at   | -0.02609745  | -0.66126343 | 0.511036541 | 0.68182957  |
| 205783_at   | 0.016255457  | 0.281440094 | 0.779364885 | 0.873842836 |
| 205784_x_at | 0.038879689  | 0.941057875 | 0.350540701 | 0.533704607 |
| 205785_at   | 0.03072728   | 0.742017746 | 0.461042097 | 0.639387246 |
| 205786_s_at | 0.077561808  | 0.918609832 | 0.362067544 | 0.545254664 |
| 205787_x_at | 0.152118584  | 3.138528679 | 0.00265853  | 0.011595101 |
| 205788_s_at | 0.309248904  | 6.389443677 | 2.97E-08    | 9.88E-07    |
| 205789_at   | 0.022780109  | 0.937202444 | 0.35250327  | 0.535697179 |
| 205790_at   | -0.01761411  | -0.3669007  | 0.715015434 | 0.832889457 |
| 205791_x_at | -0.00392471  | -0.13640324 | 0.891970317 | 0.942164861 |
| 205792_at   | 0.021835801  | 0.526530261 | 0.600508359 | 0.752057378 |
| 205793_x_at | -0.09616482  | -2.14971968 | 0.035719301 | 0.097792635 |
| 205794_s_at | -0.12336388  | -2.29089104 | 0.025585975 | 0.075091174 |
| 205795_at   | -0.52277337  | -5.42803131 | 1.14E-06    | 1.78E-05    |
| 205796_at   | -0.06757868  | -1.41833755 | 0.161391701 | 0.310259717 |
| 205797_s_at | -0.02439085  | -0.6389361  | 0.52535556  | 0.693747508 |

|             |             |             |             |             |
|-------------|-------------|-------------|-------------|-------------|
| 205798_at   | -0.00468643 | -0.0764691  | 0.93930653  | 0.968323538 |
| 205799_s_at | -0.1516203  | -4.40462058 | 4.57E-05    | 0.000381897 |
| 205800_at   | 0.019924034 | 0.597478603 | 0.55249109  | 0.714922835 |
| 205801_s_at | 0.277809129 | 2.78621746  | 0.007175248 | 0.026579046 |
| 205802_at   | 0.104680091 | 1.798791326 | 0.077204992 | 0.178581187 |
| 205803_s_at | -0.0076043  | -0.09912317 | 0.921378983 | 0.958771321 |
| 205804_s_at | 0.013920855 | 0.609654181 | 0.544449024 | 0.70886546  |
| 205805_s_at | 0.074647322 | 1.61251285  | 0.112226671 | 0.23742648  |
| 205806_at   | 0.308928468 | 4.150173042 | 0.000109037 | 0.000792373 |
| 205807_s_at | -0.06641926 | -1.72428633 | 0.089931119 | 0.200779377 |
| 205808_at   | 0.028540569 | 0.705528134 | 0.483278503 | 0.658315794 |
| 205809_s_at | -0.09909441 | -1.42270182 | 0.160127415 | 0.308505954 |
| 205810_s_at | -0.08098721 | -2.35331302 | 0.021984441 | 0.066517407 |
| 205811_at   | 0.041562581 | 1.431034314 | 0.157734917 | 0.305076763 |
| 205812_s_at | 0.162381029 | 3.159564439 | 0.002500106 | 0.010994266 |
| 205813_s_at | 0.037849013 | 0.871749531 | 0.386904771 | 0.569569091 |
| 205814_at   | -0.4243978  | -4.24909571 | 7.80E-05    | 0.00059836  |
| 205815_at   | 0.0080391   | 0.251125089 | 0.802596411 | 0.888733851 |
| 205816_at   | 0.38665719  | 4.449783527 | 3.91E-05    | 0.000335823 |
| 205817_at   | 0.014213651 | 0.281508561 | 0.779312635 | 0.873806174 |
| 205818_at   | -0.44310258 | -6.53234723 | 1.71E-08    | 6.60E-07    |
| 205819_at   | 0.002407356 | 0.063038402 | 0.949950582 | 0.974346302 |
| 205820_s_at | 0.036586108 | 1.431448146 | 0.157616822 | 0.3049574   |
| 205821_at   | 0.017308292 | 0.295638359 | 0.76855194  | 0.867402967 |
| 205822_s_at | -0.06867281 | -1.25508503 | 0.214432975 | 0.38010254  |
| 205823_at   | -0.14855775 | -2.54410118 | 0.013614812 | 0.044859419 |
| 205824_at   | 0.261092158 | 4.603629433 | 2.28E-05    | 0.00021323  |
| 205825_at   | -0.5541656  | -6.0673566  | 1.02E-07    | 2.56E-06    |
| 205826_at   | 0.004002106 | 0.066972331 | 0.946831841 | 0.972598342 |
| 205827_at   | -0.03566122 | -0.22522998 | 0.822584427 | 0.901428125 |
| 205828_at   | -0.02027885 | -0.80685645 | 0.423013781 | 0.604893194 |
| 205829_at   | 0.120595283 | 3.297217268 | 0.001662917 | 0.007807447 |
| 205830_at   | -0.04116315 | -1.36260553 | 0.178223791 | 0.333693007 |
| 205831_at   | -0.00286695 | -0.0503296  | 0.960030995 | 0.979559947 |
| 205832_at   | -0.01356664 | -0.27714743 | 0.782642789 | 0.875774135 |
| 205833_s_at | -0.01604611 | -0.39022127 | 0.697788611 | 0.821105019 |
| 205834_s_at | 6.52E-05    | 0.001321121 | 0.998950388 | 0.999509498 |
| 205835_s_at | -0.04837863 | -2.39181054 | 0.01999561  | 0.061562676 |
| 205836_s_at | -0.11318493 | -1.91333262 | 0.060597722 | 0.148192377 |
| 205837_s_at | -0.00298987 | -0.21392529 | 0.831348358 | 0.906696785 |
| 205838_at   | -0.01374206 | -0.32928211 | 0.743117182 | 0.851137702 |
| 205839_s_at | -0.35484821 | -5.96188235 | 1.53E-07    | 3.51E-06    |
| 205840_x_at | 0.08941704  | 2.845794185 | 0.006096258 | 0.023213254 |
| 205841_at   | -0.06382719 | -2.71745526 | 0.008637686 | 0.030986954 |
| 205842_s_at | -0.0392806  | -1.27507883 | 0.207316481 | 0.371075661 |
| 205843_x_at | 0.045420012 | 1.07524024  | 0.286676973 | 0.464697229 |
| 205844_at   | 0.014277029 | 0.478693922 | 0.633938733 | 0.776753905 |
| 205845_at   | -0.28320978 | -6.748401   | 7.43E-09    | 3.63E-07    |
| 205846_at   | 0.00430949  | 0.084063617 | 0.933292541 | 0.965346932 |
| 205847_at   | -0.01157937 | -0.28747799 | 0.774761125 | 0.871045119 |
| 205848_at   | -0.06935452 | -1.86404948 | 0.067329478 | 0.160956888 |
| 205849_s_at | -0.1231278  | -2.14604574 | 0.036024417 | 0.098477171 |
| 205850_s_at | -0.92422055 | -7.39416189 | 6.05E-10    | 6.58E-08    |
| 205851_at   | 0.081481422 | 2.650529607 | 0.010318814 | 0.035763353 |
| 205852_at   | -0.63952353 | -6.75601081 | 7.22E-09    | 3.56E-07    |
| 205853_at   | -0.03494235 | -0.6620173  | 0.510556742 | 0.68137249  |
| 205854_at   | 0.422344189 | 6.007101365 | 1.29E-07    | 3.08E-06    |
| 205855_at   | 0.034702139 | 1.019551824 | 0.312134338 | 0.493104202 |
| 205856_at   | 1.157727431 | 5.894435948 | 1.98E-07    | 4.30E-06    |
| 205857_at   | -0.05795909 | -2.07499419 | 0.042389605 | 0.111993156 |
| 205858_at   | 0.065840253 | 0.961505564 | 0.340251099 | 0.523099487 |
| 205859_at   | 0.133251289 | 2.033245662 | 0.046567741 | 0.120663583 |
| 205860_x_at | 0.204182337 | 1.190471658 | 0.238664124 | 0.408360481 |
| 205861_at   | -0.01548173 | -0.32042114 | 0.74978956  | 0.855819053 |
| 205862_at   | -0.01333473 | -0.2274667  | 0.82085307  | 0.900450397 |
| 205863_at   | 0.111003804 | 1.905520908 | 0.061624998 | 0.15017964  |
| 205864_at   | -0.0639457  | -1.73997473 | 0.087116225 | 0.196128655 |
| 205865_at   | 0.000888116 | 0.034793025 | 0.972363096 | 0.985997448 |
| 205866_at   | 0.022428413 | 0.579745411 | 0.56430998  | 0.724800023 |
| 205867_at   | -0.12767041 | -3.60383196 | 0.000648164 | 0.003561754 |
| 205868_s_at | -0.08810335 | -2.27533009 | 0.026561622 | 0.077299733 |
| 205869_at   | -0.01488869 | -0.36022915 | 0.71997168  | 0.835982705 |
| 205870_at   | 0.00829188  | 0.171573412 | 0.864364367 | 0.92644968  |
| 205871_at   | 0.193604554 | 2.978726001 | 0.004206868 | 0.017108466 |
| 205872_x_at | -0.33057756 | -2.97720567 | 0.004224992 | 0.017167321 |



|             |             |             |             |             |
|-------------|-------------|-------------|-------------|-------------|
| 205873_at   | 0.008133565 | 0.271747017 | 0.786772206 | 0.878353716 |
| 205874_at   | -0.86505634 | -7.06756472 | 2.15E-09    | 1.54E-07    |
| 205875_s_at | 0.233509827 | 5.596449248 | 6.09E-07    | 1.06E-05    |
| 205876_at   | 0.258563675 | 3.482164153 | 0.000947115 | 0.004871501 |
| 205877_s_at | -0.01248214 | -0.31716108 | 0.752249285 | 0.857347949 |
| 205878_at   | -0.03235438 | -0.53590988 | 0.594050387 | 0.747194076 |
| 205879_x_at | -0.03357708 | -0.83194165 | 0.408821288 | 0.590951581 |
| 205880_at   | 0.120977161 | 1.836808196 | 0.07131421  | 0.168002461 |
| 205881_at   | -0.05556514 | -1.7811575  | 0.080072479 | 0.183838447 |
| 205882_x_at | 0.272784063 | 3.591404228 | 0.00067398  | 0.00367784  |
| 205883_at   | 0.786700533 | 6.320053328 | 3.88E-08    | 1.21E-06    |
| 205884_at   | -0.0417111  | -1.29774599 | 0.199462774 | 0.361039126 |
| 205885_s_at | 0.050824337 | 2.805131594 | 0.006814992 | 0.02546832  |
| 205886_at   | -0.03421099 | -0.68436931 | 0.496441305 | 0.669532102 |
| 205887_x_at | 0.034421473 | 1.184574053 | 0.240970875 | 0.411142642 |
| 205888_s_at | 0.106235906 | 2.672006272 | 0.009749297 | 0.03418986  |
| 205889_s_at | 0.003194033 | 0.076394246 | 0.939365823 | 0.968333385 |
| 205890_s_at | 0.070349262 | 1.94161294  | 0.056999634 | 0.14132747  |
| 205891_at   | -0.10419996 | -1.85224282 | 0.069032825 | 0.164019937 |
| 205892_s_at | -0.10340024 | -2.70857485 | 0.008845301 | 0.031567053 |
| 205893_at   | -0.39377661 | -4.72616586 | 1.48E-05    | 0.000147971 |
| 205894_at   | -0.01904249 | -0.4768147  | 0.635268426 | 0.777574215 |
| 205895_s_at | -0.07160976 | -1.84905096 | 0.069499502 | 0.164857054 |
| 205896_at   | 0.199877331 | 2.392658942 | 0.019953655 | 0.061458908 |
| 205897_at   | -0.01360585 | -0.38056874 | 0.704900157 | 0.826123612 |
| 205898_at   | 0.096224933 | 0.478669399 | 0.633956076 | 0.776753905 |
| 205899_at   | -0.08992287 | -1.31805744 | 0.192616585 | 0.352226694 |
| 205900_at   | -0.01902824 | -0.42710138 | 0.670871603 | 0.801759378 |
| 205901_at   | 0.024745955 | 0.74997292  | 0.456273309 | 0.635198167 |
| 205902_at   | 0.375420503 | 4.058688433 | 0.0001482   | 0.001024337 |
| 205903_s_at | 0.207515383 | 1.979691188 | 0.052444165 | 0.132424045 |
| 205904_at   | 0.198128732 | 4.281075652 | 6.99E-05    | 0.000544463 |
| 205905_s_at | 0.068986661 | 1.95044654  | 0.055913778 | 0.139255521 |
| 205906_at   | 0.167687645 | 2.454183313 | 0.017113511 | 0.05426912  |
| 205907_s_at | 0.026040349 | 0.382794851 | 0.703257683 | 0.824912532 |
| 205908_s_at | -0.02617933 | -0.50844441 | 0.613051671 | 0.761386835 |
| 205909_at   | -0.00944001 | -0.24025903 | 0.810968457 | 0.893942341 |
| 205910_s_at | -0.01995187 | -0.62119682 | 0.536880509 | 0.703068995 |
| 205911_at   | 0.217646452 | 4.474532144 | 3.59E-05    | 0.000312258 |
| 205912_at   | -0.0732726  | -1.87497729 | 0.065784671 | 0.158041634 |
| 205913_at   | 0.486292738 | 6.250998705 | 5.06E-08    | 1.48E-06    |
| 205914_s_at | -0.46552926 | -5.74244909 | 3.51E-07    | 6.80E-06    |
| 205915_x_at | -0.77342776 | -7.18297909 | 1.38E-09    | 1.16E-07    |
| 205916_at   | 0.020336666 | 0.827451556 | 0.411340083 | 0.593555824 |
| 205917_at   | 0.124538493 | 1.955679533 | 0.055278893 | 0.138041252 |
| 205918_at   | -0.73099516 | -6.84701871 | 5.07E-09    | 2.80E-07    |
| 205919_at   | -0.01930245 | -0.38489517 | 0.701709322 | 0.823853124 |
| 205920_at   | -0.01907636 | -0.38723181 | 0.699988234 | 0.822713156 |
| 205921_s_at | -0.03990496 | -1.43908279 | 0.155450433 | 0.301902953 |
| 205922_at   | 0.076960614 | 1.42146534  | 0.160484829 | 0.309010996 |
| 205923_at   | 0.037126538 | 0.420765584 | 0.67546629  | 0.805046142 |
| 205924_at   | -0.15959646 | -1.27971865 | 0.205690421 | 0.36902119  |
| 205925_s_at | -0.06847771 | -1.48286247 | 0.143472454 | 0.284917615 |
| 205926_at   | -0.00750236 | -0.19524018 | 0.845880692 | 0.915410595 |
| 205927_s_at | 0.038802973 | 1.085423899 | 0.282181643 | 0.459493624 |
| 205928_at   | 0.098534291 | 3.11453926  | 0.002850666 | 0.012309113 |
| 205929_at   | 0.014645226 | 0.370315104 | 0.712483645 | 0.831153431 |
| 205930_at   | 0.154691069 | 4.216252133 | 8.72E-05    | 0.000656129 |
| 205931_s_at | 0.436435382 | 5.101657341 | 3.81E-06    | 4.82E-05    |
| 205932_s_at | 0.315344778 | 4.650388762 | 1.93E-05    | 0.000185755 |
| 205933_at   | -0.1084401  | -2.89325461 | 0.005346201 | 0.020821998 |
| 205934_at   | 0.131323835 | 1.294098522 | 0.200711276 | 0.362716008 |
| 205935_at   | 0.155862985 | 2.551498177 | 0.013358043 | 0.044192587 |
| 205936_s_at | 0.012390957 | 0.307736348 | 0.759374713 | 0.861463969 |
| 205937_at   | -0.43859725 | -6.11746743 | 8.45E-08    | 2.21E-06    |
| 205938_at   | -0.03207093 | -0.68655631 | 0.495071758 | 0.668356196 |
| 205939_at   | 0.010040212 | 0.365362513 | 0.71615706  | 0.833762929 |
| 205940_at   | 0.036323936 | 1.516004229 | 0.13489749  | 0.272477566 |
| 205941_s_at | -0.05394142 | -1.48361464 | 0.14327319  | 0.284623079 |
| 205942_s_at | -0.05403351 | -0.92673461 | 0.357867714 | 0.540903605 |
| 205943_at   | -0.00329036 | -0.05333392 | 0.957647363 | 0.978305676 |
| 205944_s_at | -0.01783165 | -0.46410903 | 0.644290184 | 0.783974977 |
| 205945_at   | 0.228535642 | 4.911300141 | 7.61E-06    | 8.51E-05    |
| 205946_at   | -0.05211153 | -1.13568148 | 0.260716089 | 0.435009176 |
| 205947_s_at | -0.0143923  | -0.41365674 | 0.680636381 | 0.808736371 |

|             |             |             |             |             |
|-------------|-------------|-------------|-------------|-------------|
| 205948_at   | -0.48175838 | -7.2884229  | 9.13E-10    | 8.87E-08    |
| 205949_at   | 0.001418126 | 0.031434235 | 0.97503012  | 0.98731299  |
| 205950_s_at | 0.051753514 | 1.193168274 | 0.237614728 | 0.407032481 |
| 205951_at   | -0.00672347 | -0.32179496 | 0.748753788 | 0.855104388 |
| 205952_at   | -0.15084736 | -2.45052274 | 0.017271733 | 0.054671598 |
| 205953_at   | 0.11005984  | 3.176651883 | 0.002377983 | 0.010542289 |
| 205954_at   | -0.37030076 | -5.7525299  | 3.38E-07    | 6.61E-06    |
| 205955_at   | -0.04505099 | -1.38201247 | 0.172216542 | 0.325455693 |
| 205956_x_at | 0.062012267 | 2.253424668 | 0.027990885 | 0.080531005 |
| 205957_at   | 0.273593103 | 3.699622145 | 0.000478547 | 0.002759998 |
| 205958_x_at | -0.03741033 | -0.93520023 | 0.353525283 | 0.536652919 |
| 205959_at   | -0.03098481 | -1.00527779 | 0.318898571 | 0.500323491 |
| 205960_at   | 0.156889177 | 1.504767283 | 0.1377582   | 0.27671686  |
| 205961_s_at | 0.023310522 | 0.272297675 | 0.786350862 | 0.878198853 |
| 205962_at   | -0.03093911 | -0.8518068  | 0.397791067 | 0.580091962 |
| 205963_s_at | -0.0742561  | -2.26539398 | 0.027201712 | 0.078711488 |
| 205964_at   | 0.068186037 | 2.093261922 | 0.040666177 | 0.108304199 |
| 205965_at   | -0.14620714 | -3.2188542  | 0.002099938 | 0.009494226 |
| 205966_at   | -0.01122663 | -0.75159122 | 0.455306699 | 0.634247639 |
| 205967_at   | 0.154891006 | 2.19273167  | 0.032311987 | 0.090393797 |
| 205968_at   | 0.084390733 | 2.005233243 | 0.049566506 | 0.126613299 |
| 205969_at   | -0.01977914 | -0.62961788 | 0.531393246 | 0.698521337 |
| 205970_at   | 0.337479594 | 4.262361511 | 7.45E-05    | 0.000576251 |
| 205971_s_at | -0.01241049 | -0.33125425 | 0.741634813 | 0.850137044 |
| 205972_at   | 0.174963759 | 2.93427293  | 0.004767787 | 0.018962528 |
| 205973_at   | -0.15724536 | -3.49227707 | 0.000917966 | 0.004745401 |
| 205974_at   | -0.06553217 | -1.83713346 | 0.071265487 | 0.167949649 |
| 205975_s_at | 0.094440448 | 1.835293485 | 0.071541477 | 0.168440189 |
| 205976_at   | -0.11263791 | -2.94844318 | 0.004581857 | 0.018361939 |
| 205977_s_at | -0.02017709 | -0.52649757 | 0.600530922 | 0.75206456  |
| 205978_at   | -0.51738216 | -5.84805298 | 2.36E-07    | 4.90E-06    |
| 205979_at   | 0.061330959 | 2.026319771 | 0.047294211 | 0.12210157  |
| 205980_s_at | 0.000982316 | 0.04444048  | 0.964704473 | 0.981952133 |
| 205981_s_at | -0.09604378 | -1.74119797 | 0.086899843 | 0.195742543 |
| 205982_x_at | 0.01969416  | 0.567593757 | 0.57248033  | 0.730716026 |
| 205983_at   | 0.02329397  | 0.567352752 | 0.572642955 | 0.730833275 |
| 205984_at   | -0.08512032 | -1.5336626  | 0.130497393 | 0.265969969 |
| 205985_x_at | -0.05458589 | -1.38163276 | 0.17233257  | 0.325592357 |
| 205986_at   | 0.112462743 | 2.156071094 | 0.035197152 | 0.096671037 |
| 205987_at   | 0.028104651 | 0.655523304 | 0.51469774  | 0.685139436 |
| 205988_at   | 0.0733134   | 1.429759635 | 0.158099103 | 0.305612679 |
| 205989_s_at | 0.124912104 | 0.720624607 | 0.474007117 | 0.650045294 |
| 205990_s_at | 0.09543539  | 2.098478309 | 0.040185367 | 0.107253771 |
| 205991_s_at | 0.062893294 | 1.034330078 | 0.305234059 | 0.485238877 |
| 205992_s_at | 0.127023889 | 3.785971392 | 0.000362776 | 0.00217978  |
| 205993_s_at | -0.01828938 | -0.50139933 | 0.617969661 | 0.765367884 |
| 205994_at   | -0.02402012 | -0.77331557 | 0.442445786 | 0.622794797 |
| 205995_x_at | 0.051550446 | 1.529492145 | 0.131526145 | 0.26748014  |
| 205996_s_at | 0.16646717  | 4.732676861 | 1.44E-05    | 0.000145036 |
| 205997_at   | -0.00380696 | -0.0407618  | 0.967624435 | 0.983475054 |
| 205998_x_at | 0.121604391 | 2.687688745 | 0.009351742 | 0.033055049 |
| 205999_x_at | -0.07788255 | -1.07843159 | 0.285262923 | 0.463060096 |
| 206000_at   | -0.0069438  | -0.16613501 | 0.868622917 | 0.928826967 |
| 206001_at   | -0.40044818 | -2.50875843 | 0.014904436 | 0.048328307 |
| 206002_at   | 0.028180481 | 0.829789519 | 0.410027387 | 0.592235278 |
| 206003_at   | 0.151670266 | 3.48475144  | 0.000939575 | 0.004838844 |
| 206004_at   | 0.04985516  | 1.258351396 | 0.213258169 | 0.378572216 |
| 206005_s_at | 0.064005909 | 2.304132318 | 0.024780947 | 0.073204447 |
| 206006_s_at | 0.053675386 | 1.551641324 | 0.126135595 | 0.259388124 |
| 206007_at   | -0.02098628 | -0.7248665  | 0.471420147 | 0.647769691 |
| 206008_at   | -0.06651647 | -1.31700284 | 0.192967632 | 0.352709885 |
| 206009_at   | -0.04581621 | -0.96530997 | 0.338358783 | 0.521086518 |
| 206010_at   | 0.054915804 | 1.101171402 | 0.275327251 | 0.451708895 |
| 206011_at   | 0.113496957 | 3.240019443 | 0.001972294 | 0.009001814 |
| 206012_at   | 0.02071756  | 0.74080091  | 0.46177405  | 0.63996545  |
| 206013_s_at | -0.88046214 | -8.04815783 | 4.77E-11    | 1.38E-08    |
| 206014_at   | -0.56697746 | -7.97786297 | 6.26E-11    | 1.62E-08    |
| 206015_s_at | -0.09415096 | -1.44985567 | 0.152433073 | 0.297581745 |
| 206016_at   | -0.02357913 | -0.61791585 | 0.539026311 | 0.705025622 |
| 206017_at   | -0.03725631 | -0.81238778 | 0.419859124 | 0.602058073 |
| 206018_at   | -0.22036492 | -3.02950853 | 0.003641466 | 0.015131974 |
| 206019_at   | 0.012198839 | 0.33332848  | 0.740076769 | 0.84922232  |
| 206020_at   | 0.028860983 | 0.588447207 | 0.558494786 | 0.720238225 |
| 206021_at   | 0.038706414 | 1.308209673 | 0.195913435 | 0.356534051 |
| 206022_at   | 0.22959099  | 2.923656773 | 0.004911646 | 0.019439539 |

|             |             |             |             |             |
|-------------|-------------|-------------|-------------|-------------|
| 206023_at   | -0.01513509 | -0.45796407 | 0.648672925 | 0.786878181 |
| 206024_at   | -0.01140737 | -0.27708011 | 0.78269423  | 0.875774135 |
| 206025_s_at | 0.249368258 | 2.95070091  | 0.004552862 | 0.018270318 |
| 206026_s_at | 0.08994968  | 1.413348727 | 0.162846373 | 0.312287563 |
| 206027_at   | 0.046719617 | 1.292527836 | 0.201250709 | 0.363391245 |
| 206028_s_at | 0.032538354 | 0.45411322  | 0.651425839 | 0.788683895 |
| 206029_at   | -0.0320719  | -0.88081451 | 0.38201862  | 0.564813291 |
| 206030_at   | 0.182076528 | 1.174566035 | 0.244922123 | 0.416168334 |
| 206031_s_at | -0.12727498 | -3.69333951 | 0.000488226 | 0.002807851 |
| 206032_at   | 0.009205101 | 0.402462055 | 0.68880923  | 0.814641259 |
| 206033_s_at | 0.007507916 | 0.216811409 | 0.829108808 | 0.905188868 |
| 206034_at   | -0.0011844  | -0.02688434 | 0.978643386 | 0.989111699 |
| 206035_at   | -0.0249301  | -0.51430443 | 0.608974502 | 0.758322859 |
| 206036_s_at | 0.020523364 | 0.652185636 | 0.516833002 | 0.686489153 |
| 206037_at   | 0.055939314 | 1.878449952 | 0.065300077 | 0.15719008  |
| 206038_s_at | -0.08194566 | -2.53603709 | 0.013899824 | 0.045623601 |
| 206039_at   | 0.080844648 | 0.704446548 | 0.483946607 | 0.658944697 |
| 206040_s_at | -0.03171686 | -1.06309134 | 0.292104392 | 0.470593327 |
| 206042_x_at | -0.62297797 | -5.71891054 | 3.84E-07    | 7.32E-06    |
| 206043_s_at | -0.03385806 | -0.92387995 | 0.359339738 | 0.542462813 |
| 206044_s_at | -0.01503371 | -0.38721308 | 0.700002024 | 0.822713156 |
| 206045_s_at | -0.18964306 | -4.34981974 | 5.52E-05    | 0.000448013 |
| 206046_at   | -0.57674136 | -7.02947164 | 2.50E-09    | 1.71E-07    |
| 206047_at   | 0.023783964 | 0.67894289  | 0.499848393 | 0.672552611 |
| 206048_at   | 0.013969738 | 0.675762246 | 0.501851326 | 0.674062014 |
| 206049_at   | 0.014316106 | 0.284800146 | 0.776801929 | 0.87204119  |
| 206050_s_at | -0.0300644  | -0.36491751 | 0.716487456 | 0.833944445 |
| 206051_at   | -0.04195464 | -0.47599128 | 0.635851444 | 0.778028001 |
| 206052_s_at | -0.35297053 | -3.74158207 | 0.000418456 | 0.002463336 |
| 206053_at   | -0.02720854 | -0.65215498 | 0.516852637 | 0.68649483  |
| 206054_at   | 0.019219109 | 0.638272514 | 0.525784334 | 0.694149636 |
| 206055_s_at | -0.02516454 | -0.3952172  | 0.694118447 | 0.818661538 |
| 206056_x_at | 0.249669381 | 4.51344028  | 3.13E-05    | 0.000277701 |
| 206057_x_at | -0.03772895 | -0.98756613 | 0.327427731 | 0.509763123 |
| 206058_at   | 0.217423874 | 3.537521106 | 0.000797685 | 0.004219713 |
| 206059_at   | -0.38686698 | -4.28240742 | 6.96E-05    | 0.000542607 |
| 206060_s_at | -0.00706893 | -0.26967815 | 0.788355799 | 0.879203408 |
| 206061_s_at | 0.270699402 | 3.09449909  | 0.003021061 | 0.012917839 |
| 206062_at   | -0.43781481 | -6.45115522 | 2.34E-08    | 8.27E-07    |
| 206063_x_at | 0.027641394 | 0.640935945 | 0.524064481 | 0.692650073 |
| 206064_s_at | -0.03058422 | -0.81978219 | 0.415664132 | 0.597884246 |
| 206065_s_at | -0.06105007 | -1.54507179 | 0.127715725 | 0.261697716 |
| 206066_s_at | -0.16845764 | -4.05955886 | 0.00014777  | 0.001021702 |
| 206067_s_at | -0.11625909 | -3.39423769 | 0.001240331 | 0.006106289 |
| 206068_s_at | 0.080053858 | 1.934347593 | 0.057906153 | 0.142996009 |
| 206069_s_at | 0.057522629 | 1.561518588 | 0.123789315 | 0.255573154 |
| 206070_s_at | -0.02176956 | -0.95609045 | 0.342956553 | 0.525834355 |
| 206071_s_at | 0.00129956  | 0.044845935 | 0.964382671 | 0.981714013 |
| 206072_at   | -0.03154739 | -0.53282965 | 0.596167567 | 0.748845445 |
| 206073_at   | -0.07471534 | -1.75962149 | 0.083694368 | 0.19001619  |
| 206074_s_at | -0.24928027 | -6.42406085 | 2.60E-08    | 8.94E-07    |
| 206075_s_at | -0.16111956 | -4.00855854 | 0.000175101 | 0.001177407 |
| 206076_at   | 0.229076852 | 2.782535251 | 0.00724739  | 0.026801851 |
| 206077_at   | -0.01416567 | -0.37263328 | 0.710766556 | 0.83012541  |
| 206078_at   | -0.14689742 | -3.29863609 | 0.001655859 | 0.007786942 |
| 206079_at   | -0.00434096 | -0.12528381 | 0.900727932 | 0.947050599 |
| 206080_at   | -0.01422334 | -0.25627687 | 0.798635132 | 0.885892313 |
| 206081_at   | 0.168268226 | 4.647148998 | 1.96E-05    | 0.000187633 |
| 206082_at   | 0.075301582 | 1.463035283 | 0.14880403  | 0.29259315  |
| 206083_at   | -0.09752466 | -2.194451   | 0.032181932 | 0.090128768 |
| 206084_at   | -0.38870219 | -6.16280667 | 7.10E-08    | 1.93E-06    |
| 206085_s_at | 0.000624775 | 0.027555748 | 0.978110159 | 0.988841116 |
| 206086_x_at | 0.004200763 | 0.093840964 | 0.925555797 | 0.960924883 |
| 206087_x_at | 0.094444299 | 2.540737833 | 0.013733034 | 0.045185655 |
| 206088_at   | 0.187804279 | 2.337565372 | 0.022847615 | 0.068595028 |
| 206089_at   | -0.12815324 | -1.94063269 | 0.057121231 | 0.141589687 |
| 206090_s_at | 0.097812613 | 2.209544656 | 0.031059808 | 0.08753468  |
| 206091_at   | 0.038275689 | 2.170419462 | 0.034042112 | 0.094216627 |
| 206092_x_at | -0.05115482 | -1.02535587 | 0.309411831 | 0.489963276 |
| 206093_x_at | 0.165860905 | 4.175363584 | 0.000100147 | 0.000737483 |
| 206094_x_at | -0.00913069 | -0.23758309 | 0.813033652 | 0.894977832 |
| 206095_s_at | 0.226250112 | 3.416251379 | 0.00115975  | 0.005764183 |
| 206096_at   | 0.055518734 | 1.613636858 | 0.111981997 | 0.237021046 |
| 206097_at   | 0.060598924 | 1.768004378 | 0.082268687 | 0.187484174 |
| 206098_at   | 0.046616839 | 1.629443262 | 0.108586755 | 0.231700132 |

|             |             |             |             |             |
|-------------|-------------|-------------|-------------|-------------|
| 206099_at   | -0.26641621 | -4.74924676 | 1.36E-05    | 0.00013796  |
| 206100_at   | 0.108348627 | 1.4990197   | 0.139239856 | 0.278864188 |
| 206101_at   | 0.467005296 | 3.442523906 | 0.001070071 | 0.005389182 |
| 206102_at   | -0.04562895 | -1.57149987 | 0.12145395  | 0.251856901 |
| 206103_at   | -0.00456967 | -0.12680722 | 0.899527342 | 0.946244733 |
| 206104_at   | -0.0789975  | -1.48657626 | 0.142490725 | 0.283560223 |
| 206105_at   | 0.052471852 | 1.177772828 | 0.243651008 | 0.414512785 |
| 206106_at   | -0.00728495 | -0.12320516 | 0.902366482 | 0.948152703 |
| 206107_at   | -0.04965798 | -0.778166   | 0.439603678 | 0.620104395 |
| 206108_s_at | 0.041104835 | 0.554891567 | 0.581081976 | 0.737168687 |
| 206109_at   | 0.003481556 | 0.079378476 | 0.937002197 | 0.96732401  |
| 206110_at   | 0.055423973 | 1.098139557 | 0.276637778 | 0.453135904 |
| 206111_at   | 0.137546692 | 2.058609075 | 0.043988978 | 0.115372971 |
| 206112_at   | -0.04033744 | -1.53688526 | 0.129706836 | 0.264783309 |
| 206113_s_at | -0.30380832 | -2.93948649 | 0.004698579 | 0.018742316 |
| 206114_at   | -0.17630012 | -2.22414885 | 0.030007007 | 0.085142097 |
| 206115_at   | -1.08303281 | -7.53585164 | 3.49E-10    | 4.66E-08    |
| 206116_s_at | -0.12314607 | -1.50976325 | 0.136480454 | 0.274768433 |
| 206117_at   | 0.084555909 | 1.763692331 | 0.082999495 | 0.188831879 |
| 206118_at   | -0.38217714 | -5.6644564  | 4.72E-07    | 8.64E-06    |
| 206119_at   | 0.028158095 | 0.419676313 | 0.676257481 | 0.805632396 |
| 206120_at   | -0.0390972  | -0.67741051 | 0.500812831 | 0.673334949 |
| 206121_at   | 0.026780715 | 0.546023664 | 0.587123672 | 0.74198991  |
| 206122_at   | 0.074817834 | 1.710614957 | 0.092444954 | 0.205100769 |
| 206123_at   | -0.05784098 | -1.26628975 | 0.210422878 | 0.375163332 |
| 206124_s_at | -0.0285412  | -0.72199943 | 0.473167788 | 0.649268732 |
| 206125_s_at | 0.016611666 | 0.354333023 | 0.72436195  | 0.838900862 |
| 206126_at   | -0.04840529 | -0.82688268 | 0.411659874 | 0.593921396 |
| 206127_at   | 0.01313039  | 0.319707077 | 0.750328101 | 0.856228996 |
| 206128_at   | -0.28829257 | -4.49707262 | 3.31E-05    | 0.000291765 |
| 206129_s_at | -0.00899098 | -0.17944203 | 0.858210016 | 0.922663509 |
| 206130_s_at | 0.027695238 | 0.479753634 | 0.633189437 | 0.776258465 |
| 206131_at   | -0.00769219 | -0.21786876 | 0.828288688 | 0.904656022 |
| 206132_at   | -0.00219793 | -0.04730344 | 0.962432328 | 0.980912785 |
| 206133_at   | -0.01530131 | -0.36114713 | 0.719288998 | 0.835754573 |
| 206134_at   | -0.02601266 | -0.86233498 | 0.392020549 | 0.574777315 |
| 206135_at   | 0.549937686 | 3.908082407 | 0.000243883 | 0.001561323 |
| 206136_at   | -0.00549585 | -0.11791042 | 0.906542099 | 0.950369017 |
| 206137_at   | -0.56625057 | -5.89412363 | 1.98E-07    | 4.30E-06    |
| 206138_s_at | 0.183579701 | 6.128329346 | 8.10E-08    | 2.14E-06    |
| 206139_at   | 0.034972003 | 1.018057529 | 0.312837881 | 0.493872586 |
| 206140_at   | 0.378081445 | 2.850782773 | 0.006013075 | 0.022942122 |
| 206141_at   | -0.04605126 | -1.32735908 | 0.189541142 | 0.348198484 |
| 206142_at   | 0.057184703 | 1.648902958 | 0.104522034 | 0.225209659 |
| 206143_at   | -0.00828547 | -0.43956277 | 0.661871542 | 0.795773338 |
| 206144_at   | 0.033176836 | 0.646863666 | 0.520247427 | 0.689382818 |
| 206145_at   | -0.00342652 | -0.16371011 | 0.870523009 | 0.930159402 |
| 206146_s_at | -0.0676971  | -1.28578554 | 0.203578596 | 0.366469352 |
| 206147_x_at | 0.071657048 | 2.030327506 | 0.046872649 | 0.121270837 |
| 206148_at   | 0.041620285 | 0.858783728 | 0.393961151 | 0.576614106 |
| 206149_at   | -0.03308304 | -0.82885952 | 0.410549248 | 0.592755029 |
| 206150_at   | -0.00546663 | -0.13547326 | 0.892702261 | 0.942576672 |
| 206151_x_at | -0.04850631 | -1.07117291 | 0.28848619  | 0.466665152 |
| 206152_at   | -0.29027669 | -5.26160822 | 2.12E-06    | 2.97E-05    |
| 206153_at   | 0.09696915  | 2.366765785 | 0.021270229 | 0.064764211 |
| 206154_at   | -0.0992558  | -2.17431731 | 0.033734133 | 0.09352642  |
| 206155_at   | 0.004487341 | 0.097669902 | 0.922527911 | 0.959430745 |
| 206156_at   | -0.00881612 | -0.23935891 | 0.811662983 | 0.894460413 |
| 206157_at   | 0.036875006 | 1.01160737  | 0.315887028 | 0.497188739 |
| 206158_s_at | 0.083880011 | 0.993265777 | 0.324666604 | 0.506881851 |
| 206159_at   | 0.251382214 | 3.614273062 | 0.000627206 | 0.003465337 |
| 206160_at   | 0.035435199 | 0.869350194 | 0.388204566 | 0.570922545 |
| 206161_s_at | -0.78812616 | -8.71633982 | 3.61E-12    | 3.59E-09    |
| 206162_x_at | -0.7969487  | -7.54223254 | 3.40E-10    | 4.61E-08    |
| 206163_at   | 0.012171642 | 0.38116037  | 0.704463502 | 0.82572013  |
| 206164_at   | -0.01263945 | -0.35493337 | 0.7239145   | 0.838621707 |
| 206165_s_at | 0.015254558 | 0.463720691 | 0.644566782 | 0.784181493 |
| 206166_s_at | 0.000748671 | 0.020563182 | 0.983664009 | 0.99200796  |
| 206167_s_at | 0.220656362 | 3.429375617 | 0.001114096 | 0.005573847 |
| 206168_at   | -0.0002995  | -0.00686572 | 0.994545326 | 0.997401932 |
| 206169_x_at | 0.405021114 | 6.13083701  | 8.03E-08    | 2.12E-06    |
| 206170_at   | 0.125009406 | 2.74180187  | 0.008091191 | 0.029367319 |
| 206171_at   | 0.234968201 | 3.829516179 | 0.000315102 | 0.001940014 |
| 206172_at   | -0.25176728 | -2.42970547 | 0.018196799 | 0.057082288 |
| 206173_x_at | 0.036134528 | 1.276792123 | 0.206714933 | 0.370295555 |

|             |             |             |             |             |
|-------------|-------------|-------------|-------------|-------------|
| 206174_s_at | -0.09539373 | -1.85577675 | 0.068519218 | 0.163077052 |
| 206175_x_at | -0.04755058 | -1.39090121 | 0.169517531 | 0.321715466 |
| 206176_at   | -0.05901748 | -1.1232093  | 0.265931889 | 0.441150216 |
| 206177_s_at | -0.0145234  | -0.43092957 | 0.668101513 | 0.799989091 |
| 206178_at   | -0.01064174 | -0.24159477 | 0.80993808  | 0.893311313 |
| 206179_s_at | -0.15804801 | -1.40615993 | 0.164960338 | 0.315451091 |
| 206180_x_at | -0.07958969 | -1.77738383 | 0.080697523 | 0.184931478 |
| 206181_at   | -0.01675794 | -0.49618486 | 0.621621112 | 0.767605333 |
| 206182_at   | -0.06039376 | -1.53861843 | 0.129283248 | 0.264097583 |
| 206183_s_at | -0.16425746 | -5.01158617 | 5.29E-06    | 6.31E-05    |
| 206184_at   | -0.03665894 | -0.84851824 | 0.399604241 | 0.581928536 |
| 206185_at   | -0.02846514 | -0.58059506 | 0.563740868 | 0.72431885  |
| 206186_at   | 0.028676988 | 0.696737568 | 0.488723356 | 0.663125394 |
| 206187_at   | 0.004591942 | 0.160215805 | 0.873262402 | 0.931763436 |
| 206188_at   | -0.00192841 | -0.07313155 | 0.941950634 | 0.969917428 |
| 206189_at   | 0.07671855  | 2.297966948 | 0.02515294  | 0.074081744 |
| 206190_at   | 0.47334538  | 4.142638026 | 0.000111842 | 0.000809462 |
| 206191_at   | -1.039846   | -8.19348893 | 2.71E-11    | 1.03E-08    |
| 206192_at   | -0.01066466 | -0.18884796 | 0.850864882 | 0.918154662 |
| 206193_s_at | -0.00351572 | -0.08077578 | 0.935895674 | 0.966652402 |
| 206194_at   | 0.068287896 | 2.262068395 | 0.027418978 | 0.079196599 |
| 206195_x_at | 0.031459081 | 0.694654197 | 0.490018743 | 0.664318318 |
| 206196_s_at | -0.94186718 | -6.79394869 | 6.23E-09    | 3.21E-07    |
| 206197_at   | -0.19272342 | -2.11928063 | 0.038316813 | 0.103340474 |
| 206198_s_at | -0.02098968 | -0.85426956 | 0.396436535 | 0.578985708 |
| 206199_at   | 0.0181152   | 0.496901924 | 0.621118415 | 0.767280677 |
| 206200_s_at | -0.14031827 | -2.41870397 | 0.01870344  | 0.058335833 |
| 206201_s_at | 0.012889208 | 0.892391544 | 0.375835159 | 0.558649202 |
| 206202_at   | -0.00302991 | -0.16573045 | 0.868939866 | 0.929037794 |
| 206203_at   | 0.010040206 | 0.247164927 | 0.805644988 | 0.890595639 |
| 206204_at   | -0.03501915 | -1.29187326 | 0.201475834 | 0.363650821 |
| 206205_at   | -0.00720854 | -0.29175921 | 0.771501698 | 0.869191406 |
| 206206_at   | 0.067969644 | 1.777191255 | 0.080729528 | 0.184995336 |
| 206207_at   | -0.00417359 | -0.08869221 | 0.929629113 | 0.963337434 |
| 206208_at   | 0.045211639 | 0.860849138 | 0.392831771 | 0.575620903 |
| 206209_s_at | 0.028359283 | 0.551296711 | 0.583527551 | 0.73926392  |
| 206210_s_at | -0.03450186 | -0.7443711  | 0.459628394 | 0.638139552 |
| 206211_at   | 0.133950237 | 2.500505544 | 0.015221049 | 0.049226363 |
| 206212_at   | 0.079119421 | 1.656160774 | 0.103038121 | 0.222649906 |
| 206213_at   | -0.23243284 | -3.7975785  | 0.000349433 | 0.002113877 |
| 206214_at   | -0.11965209 | -3.23363698 | 0.002009995 | 0.009144936 |
| 206215_at   | -0.21624456 | -4.20304416 | 9.12E-05    | 0.000681955 |
| 206216_at   | 0.107650678 | 2.525940556 | 0.014264283 | 0.046556586 |
| 206217_at   | 0.011211179 | 0.199194135 | 0.842800836 | 0.913604147 |
| 206218_at   | -0.01461997 | -0.49477867 | 0.622607441 | 0.768169286 |
| 206219_s_at | -0.04003294 | -1.19001562 | 0.238841924 | 0.408570898 |
| 206220_s_at | -0.00649181 | -0.14792843 | 0.882907375 | 0.937355007 |
| 206221_at   | -0.03081232 | -1.19594657 | 0.236537049 | 0.405825741 |
| 206222_at   | 0.039536641 | 1.351441928 | 0.181751139 | 0.338352226 |
| 206223_at   | -0.1021093  | -2.42203916 | 0.018548527 | 0.057933522 |
| 206224_at   | -0.00775936 | -0.18641122 | 0.852766499 | 0.919199276 |
| 206225_at   | 0.065629191 | 1.544865221 | 0.127765664 | 0.261764726 |
| 206226_at   | -0.08365602 | -1.26618981 | 0.210458397 | 0.375178653 |
| 206227_at   | 0.028572519 | 0.523417544 | 0.602658671 | 0.753609998 |
| 206228_at   | 0.031404051 | 0.966739014 | 0.337649773 | 0.520460911 |
| 206229_x_at | 0.032591117 | 0.956456105 | 0.342773425 | 0.52569335  |
| 206230_at   | -0.03672572 | -0.78060498 | 0.438178636 | 0.61864137  |
| 206231_at   | -0.23176593 | -5.89288977 | 1.99E-07    | 4.32E-06    |
| 206232_s_at | -0.35408171 | -5.41273308 | 1.21E-06    | 1.86E-05    |
| 206233_at   | -0.60660656 | -6.75619077 | 7.21E-09    | 3.56E-07    |
| 206234_s_at | -0.21777654 | -4.7962685  | 1.15E-05    | 0.000119863 |
| 206235_at   | -0.29571045 | -7.5250765  | 3.64E-10    | 4.76E-08    |
| 206236_at   | 0.147934872 | 2.960810531 | 0.00442511  | 0.017837741 |
| 206237_s_at | 0.026304968 | 0.437473909 | 0.663376749 | 0.796872293 |
| 206238_s_at | -0.01728097 | -0.53305244 | 0.596014315 | 0.748701972 |
| 206239_s_at | 0.045366684 | 1.576092264 | 0.120391384 | 0.250129317 |
| 206240_s_at | 0.241710449 | 4.48833201  | 3.42E-05    | 0.000299625 |
| 206241_at   | -0.0434517  | -1.88805522 | 0.063975406 | 0.154718012 |
| 206242_at   | -0.01706788 | -0.50451667 | 0.615791345 | 0.763681557 |
| 206243_at   | 0.064798297 | 1.570435751 | 0.121701231 | 0.252201498 |
| 206244_at   | 0.022033288 | 0.765910662 | 0.44680541  | 0.626683008 |
| 206245_s_at | -0.36688855 | -3.37171525 | 0.001328245 | 0.006470672 |
| 206246_at   | 0.005706028 | 0.177149912 | 0.860001874 | 0.923668024 |
| 206247_at   | 0.137013642 | 2.97945487  | 0.004198205 | 0.017084882 |
| 206248_at   | -0.06431896 | -1.71333912 | 0.091939479 | 0.204263233 |

|             |             |             |             |             |
|-------------|-------------|-------------|-------------|-------------|
| 206249_at   | -0.21004499 | -5.28257255 | 1.96E-06    | 2.79E-05    |
| 206250_x_at | -0.02233272 | -0.80540386 | 0.423844583 | 0.605422593 |
| 206251_s_at | 0.016679317 | 0.691909445 | 0.491728251 | 0.665735852 |
| 206252_s_at | -0.01883161 | -0.50666786 | 0.614290167 | 0.762416511 |
| 206253_at   | -0.59319317 | -6.12349187 | 8.25E-08    | 2.17E-06    |
| 206254_at   | 0.035216032 | 1.724164312 | 0.089953303 | 0.200810281 |
| 206255_at   | 0.004977863 | 0.200198765 | 0.842018689 | 0.913297235 |
| 206256_at   | -0.01958561 | -0.48337015 | 0.630635202 | 0.774443992 |
| 206257_at   | 0.019425776 | 0.510595678 | 0.611553468 | 0.760313125 |
| 206258_at   | 0.022057854 | 0.62098249  | 0.537020548 | 0.70314717  |
| 206259_at   | -0.0439999  | -0.83047159 | 0.409644905 | 0.591816715 |
| 206260_at   | -0.00243274 | -0.05645493 | 0.955171563 | 0.976921241 |
| 206261_at   | -0.03509852 | -0.77118195 | 0.443699381 | 0.623874357 |
| 206262_at   | -0.00918955 | -0.33242766 | 0.740753281 | 0.84949695  |
| 206263_at   | 0.044145431 | 0.881643122 | 0.38157393  | 0.564283382 |
| 206264_at   | -0.01704549 | -0.41182545 | 0.681970744 | 0.809849774 |
| 206265_s_at | -0.01150178 | -0.47962608 | 0.63327961  | 0.776324548 |
| 206266_at   | 0.019141345 | 0.555150319 | 0.580906137 | 0.737092075 |
| 206267_s_at | -0.32804699 | -6.94853977 | 3.42E-09    | 2.12E-07    |
| 206268_at   | -0.02827689 | -0.89242082 | 0.375819601 | 0.558649202 |
| 206269_at   | -0.00872064 | -0.22559708 | 0.822300212 | 0.901251124 |
| 206270_at   | -0.64257392 | -8.37313149 | 1.35E-11    | 6.31E-09    |
| 206271_at   | 0.074368793 | 2.61725983  | 0.01126122  | 0.038398293 |
| 206272_at   | -0.02718089 | -0.47119537 | 0.639251736 | 0.780649741 |
| 206273_at   | 0.077640458 | 1.694749367 | 0.095434517 | 0.210029595 |
| 206274_s_at | 0.154394232 | 3.011802247 | 0.003830029 | 0.015809703 |
| 206275_s_at | -0.21711365 | -4.60523385 | 2.27E-05    | 0.000212294 |
| 206276_at   | 0.001509746 | 0.037683362 | 0.970068298 | 0.984891851 |
| 206277_at   | 0.022097685 | 0.575975892 | 0.566838305 | 0.72681502  |
| 206278_at   | -0.09819068 | -1.19364582 | 0.23742924  | 0.40685509  |
| 206279_at   | 0.044356205 | 1.344939437 | 0.183830069 | 0.340987719 |
| 206280_at   | -0.36020796 | -4.04107824 | 0.000157161 | 0.001075131 |
| 206281_at   | 0.005344635 | 0.127767404 | 0.898770751 | 0.945971984 |
| 206282_at   | -0.00766854 | -0.22047502 | 0.826267998 | 0.903714194 |
| 206283_s_at | 0.257148048 | 6.065874799 | 1.03E-07    | 2.58E-06    |
| 206284_x_at | -0.25399785 | -3.29189042 | 0.001689671 | 0.007912279 |
| 206285_at   | -0.0589836  | -1.49893025 | 0.139263013 | 0.278875463 |
| 206286_s_at | 0.039545294 | 0.869176958 | 0.388298519 | 0.571018966 |
| 206287_s_at | -0.06928235 | -2.24626793 | 0.028472361 | 0.081674375 |
| 206288_at   | 0.010635714 | 0.463667958 | 0.644604346 | 0.784181493 |
| 206289_at   | -0.00334416 | -0.11007655 | 0.912724999 | 0.953763372 |
| 206290_s_at | -1.13297557 | -5.89117765 | 2.00E-07    | 4.34E-06    |
| 206291_at   | 0.196785637 | 1.558177163 | 0.124579107 | 0.256907044 |
| 206292_s_at | -0.03381382 | -1.08203886 | 0.283670415 | 0.461094678 |
| 206293_at   | 0.041350725 | 1.326291638 | 0.189892177 | 0.348647071 |
| 206294_at   | -0.0140647  | -0.38675835 | 0.700336839 | 0.822905508 |
| 206295_at   | 0.051827469 | 1.778616695 | 0.080492874 | 0.184604481 |
| 206296_x_at | 0.046418472 | 1.30688628  | 0.196359697 | 0.357115912 |
| 206297_at   | -0.06818366 | -1.45793222 | 0.150201063 | 0.294510854 |
| 206298_at   | 0.133888134 | 2.273593913 | 0.026672496 | 0.077541612 |
| 206299_at   | -0.11055397 | -2.03253254 | 0.046642094 | 0.120835225 |
| 206300_s_at | 0.005004273 | 0.199349861 | 0.842679586 | 0.913604147 |
| 206301_at   | -0.01292147 | -0.29567983 | 0.768520423 | 0.867402967 |
| 206302_s_at | 0.21163079  | 1.950808202 | 0.0558697   | 0.139182198 |
| 206303_s_at | 0.060648666 | 1.394233119 | 0.168514241 | 0.320450959 |
| 206304_at   | -0.02826685 | -0.45300893 | 0.652216182 | 0.789223026 |
| 206305_s_at | 0.027765977 | 0.870926144 | 0.387350518 | 0.569966147 |
| 206306_at   | -0.32032464 | -3.86455851 | 0.000281164 | 0.001762629 |
| 206307_s_at | 0.178928705 | 5.010830471 | 5.31E-06    | 6.32E-05    |
| 206308_at   | 0.033982858 | 0.754550941 | 0.453541927 | 0.632797671 |
| 206309_at   | -0.15129531 | -4.12342377 | 0.000119312 | 0.000855907 |
| 206310_at   | -0.00234949 | -0.04894427 | 0.961130241 | 0.980188777 |
| 206311_s_at | -0.03322506 | -1.15798607 | 0.251570268 | 0.424511173 |
| 206312_at   | -9.21E-05   | -0.00404625 | 0.996785317 | 0.998550408 |
| 206313_at   | -0.01628355 | -0.41665261 | 0.678455662 | 0.807325748 |
| 206314_at   | 0.052904205 | 1.297931137 | 0.199399555 | 0.360996714 |
| 206315_at   | 0.401479791 | 3.11267526  | 0.002866127 | 0.012352224 |
| 206316_s_at | 0.029876037 | 1.170294293 | 0.246622768 | 0.418278804 |
| 206317_s_at | -0.02180036 | -0.61784142 | 0.539075037 | 0.705025622 |
| 206318_at   | -0.01593509 | -0.6150078  | 0.540931898 | 0.706367994 |
| 206319_s_at | -0.02125172 | -0.37776005 | 0.706974484 | 0.827368464 |
| 206320_s_at | 0.089259843 | 2.50193465  | 0.015165791 | 0.049086729 |
| 206321_at   | 0.040157481 | 1.396596799 | 0.167805276 | 0.319496658 |
| 206322_at   | -0.02433425 | -0.56240775 | 0.575984686 | 0.733283224 |
| 206323_x_at | 0.091264967 | 1.881195689 | 0.064919062 | 0.156449864 |

|             |             |             |             |             |
|-------------|-------------|-------------|-------------|-------------|
| 206324_s_at | 0.048067975 | 1.064177438 | 0.291616323 | 0.470058976 |
| 206325_at   | 0.007717621 | 0.188522668 | 0.851118686 | 0.918250567 |
| 206326_at   | -0.01416965 | -0.49474453 | 0.622631402 | 0.768169286 |
| 206327_s_at | -0.02012412 | -0.5347064  | 0.594877177 | 0.747813085 |
| 206328_at   | -0.08761119 | -1.02755852 | 0.308382856 | 0.48890552  |
| 206329_at   | -0.04187525 | -0.86562998 | 0.390225308 | 0.573135807 |
| 206330_s_at | -0.36580739 | -3.83875993 | 0.000305786 | 0.001893613 |
| 206331_at   | 0.009958956 | 0.283560083 | 0.777747527 | 0.87253651  |
| 206332_s_at | 0.424323245 | 3.727454824 | 0.000437832 | 0.002558524 |
| 206333_at   | 0.007290182 | 0.281955731 | 0.778971411 | 0.873519592 |
| 206334_at   | 0.038377235 | 1.312057419 | 0.194620266 | 0.354729564 |
| 206335_at   | 0.191479492 | 3.366417666 | 0.001349764 | 0.006554783 |
| 206336_at   | -0.00486086 | -0.19276238 | 0.84781196  | 0.916324921 |
| 206337_at   | -0.07668594 | -1.39305269 | 0.168869162 | 0.320921061 |
| 206338_at   | -0.06784619 | -1.04601011 | 0.29985438  | 0.479192304 |
| 206339_at   | 0.01829123  | 0.451241875 | 0.653481699 | 0.790041617 |
| 206340_at   | 0.052150724 | 1.216610926 | 0.228632602 | 0.396186586 |
| 206341_at   | 0.035718624 | 1.253954241 | 0.214840797 | 0.380580479 |
| 206342_x_at | -0.55118128 | -7.8090935  | 1.21E-10    | 2.34E-08    |
| 206343_s_at | -0.13917607 | -4.35630037 | 5.40E-05    | 0.000439803 |
| 206344_at   | -0.01958417 | -0.69682147 | 0.488671227 | 0.663094926 |
| 206345_s_at | -0.03907487 | -0.85355921 | 0.396826936 | 0.579234091 |
| 206346_at   | 0.002321962 | 0.1199525   | 0.904931323 | 0.94961588  |
| 206347_at   | -0.06990801 | -2.3429966  | 0.02254656  | 0.067846139 |
| 206348_s_at | -0.06904405 | -2.57775467 | 0.012481678 | 0.041791365 |
| 206349_at   | -0.33392773 | -3.64933509 | 0.00056146  | 0.003159103 |
| 206350_at   | -0.01159906 | -0.30628423 | 0.760474446 | 0.862124164 |
| 206351_s_at | -0.05341809 | -1.2873647  | 0.20303157  | 0.365764549 |
| 206352_s_at | 0.001006054 | 0.025326236 | 0.979880845 | 0.989895432 |
| 206353_at   | 0.05876568  | 1.229793319 | 0.223691948 | 0.390853099 |
| 206354_at   | 0.019453653 | 1.18172544  | 0.242090815 | 0.412596678 |
| 206355_at   | -1.57041753 | -7.1115742  | 1.82E-09    | 1.36E-07    |
| 206356_s_at | -1.26171462 | -8.8832141  | 1.90E-12    | 2.88E-09    |
| 206357_at   | -0.03245353 | -0.76975779 | 0.444537298 | 0.624697699 |
| 206358_at   | -0.01329151 | -0.29639361 | 0.767978033 | 0.867079483 |
| 206359_at   | 0.070068277 | 0.961909217 | 0.340049992 | 0.522898234 |
| 206360_s_at | -0.03141925 | -0.70453815 | 0.483890007 | 0.658907778 |
| 206361_at   | 0.072544217 | 1.622816837 | 0.109999815 | 0.233922332 |
| 206362_x_at | -0.20533162 | -4.52589322 | 3.00E-05    | 0.000268254 |
| 206363_at   | -0.02039123 | -0.59024476 | 0.55729726  | 0.71935554  |
| 206364_at   | -0.00557017 | -0.26681832 | 0.7905463   | 0.880723284 |
| 206365_at   | -0.02585196 | -1.14096278 | 0.258529492 | 0.432450035 |
| 206366_x_at | 0.026028194 | 0.529619567 | 0.598377744 | 0.750440513 |
| 206367_at   | 0.025591512 | 0.670971269 | 0.504876534 | 0.67676172  |
| 206368_at   | -0.31238477 | -6.54303086 | 1.64E-08    | 6.43E-07    |
| 206369_s_at | -0.00089924 | -0.02454995 | 0.980497398 | 0.990272663 |
| 206370_at   | 0.002417734 | 0.148283884 | 0.882628105 | 0.937214361 |
| 206371_at   | -0.05557753 | -1.42087859 | 0.160654649 | 0.30926007  |
| 206372_at   | -0.02603031 | -0.72783408 | 0.469615093 | 0.646322721 |
| 206373_at   | 0.259115658 | 2.603689351 | 0.01166764  | 0.039548639 |
| 206374_at   | -0.50208873 | -6.11029096 | 8.68E-08    | 2.26E-06    |
| 206375_s_at | 0.056315555 | 1.393198106 | 0.168825408 | 0.320863    |
| 206376_at   | -0.07759458 | -1.08216855 | 0.283613274 | 0.461088816 |
| 206377_at   | 0.192319253 | 2.89058541  | 0.005386007 | 0.02094541  |
| 206378_at   | 0.019719773 | 0.865246766 | 0.390433834 | 0.573291353 |
| 206379_at   | 0.009484224 | 0.253345928 | 0.80088813  | 0.887488342 |
| 206380_s_at | -0.03865183 | -0.71842903 | 0.475349254 | 0.651286331 |
| 206381_at   | -0.69842526 | -6.663661   | 1.03E-08    | 4.58E-07    |
| 206382_s_at | 0.002987228 | 0.098965113 | 0.92150393  | 0.958834365 |
| 206383_s_at | -0.29584722 | -4.47557746 | 3.57E-05    | 0.000311545 |
| 206384_at   | -1.10331874 | -7.24995042 | 1.06E-09    | 9.69E-08    |
| 206385_s_at | -0.17434265 | -1.87417237 | 0.065897428 | 0.158261477 |
| 206386_at   | 0.050184464 | 1.410464943 | 0.163691858 | 0.313602389 |
| 206387_at   | -0.10893485 | -1.82075958 | 0.073753233 | 0.172385309 |
| 206388_at   | 0.016881927 | 0.354028315 | 0.724589091 | 0.839098688 |
| 206389_s_at | 0.006919279 | 0.187124063 | 0.852210108 | 0.918976333 |
| 206390_x_at | 0.034217118 | 0.82451329  | 0.412993455 | 0.595295559 |
| 206391_at   | 0.038981742 | 0.820295632 | 0.415373792 | 0.597583893 |
| 206392_s_at | -0.04721484 | -1.49375968 | 0.140606827 | 0.280912514 |
| 206393_at   | 0.006310217 | 0.142644212 | 0.887060793 | 0.939332329 |
| 206394_at   | 0.029784233 | 0.773051927 | 0.442600573 | 0.622818161 |
| 206395_at   | 0.082370378 | 2.031548758 | 0.046744836 | 0.12103825  |
| 206396_at   | -0.19932885 | -4.24761857 | 7.84E-05    | 0.000600966 |
| 206397_x_at | 0.522825908 | 6.801622035 | 6.05E-09    | 3.15E-07    |
| 206398_s_at | 0.08672429  | 1.962346696 | 0.054478947 | 0.136478312 |

|             |             |             |             |             |
|-------------|-------------|-------------|-------------|-------------|
| 206399_x_at | -0.10625747 | -1.73758013 | 0.087541101 | 0.196869465 |
| 206400_at   | -0.0320213  | -0.76073451 | 0.449867696 | 0.629319115 |
| 206401_s_at | 0.031068921 | 0.729621909 | 0.468529525 | 0.645437381 |
| 206402_s_at | 0.026261069 | 0.480621815 | 0.632575857 | 0.775837761 |
| 206403_at   | 0.210094744 | 1.570753758 | 0.12162729  | 0.252099381 |
| 206404_at   | -0.5119255  | -6.68084004 | 9.65E-09    | 4.35E-07    |
| 206405_x_at | 0.021947803 | 0.589173286 | 0.558010919 | 0.719812503 |
| 206406_at   | 0.007221005 | 0.150281717 | 0.881058738 | 0.936404673 |
| 206407_s_at | 0.017531295 | 0.447137538 | 0.656425059 | 0.792141184 |
| 206408_at   | -0.65240837 | -6.5978824  | 1.33E-08    | 5.55E-07    |
| 206409_at   | -0.22723785 | -4.86527438 | 8.98E-06    | 9.78E-05    |
| 206410_at   | 0.005306912 | 0.132582728 | 0.894977868 | 0.943802522 |
| 206411_s_at | -0.05988513 | -2.09888032 | 0.040148518 | 0.107174624 |
| 206412_at   | 0.012275829 | 0.307728668 | 0.759380527 | 0.861463969 |
| 206413_s_at | 0.131577574 | 3.78796101  | 0.000360455 | 0.002169039 |
| 206414_s_at | -0.392711   | -5.23089618 | 2.37E-06    | 3.26E-05    |
| 206415_at   | -0.02459248 | -1.16154353 | 0.250133044 | 0.422596529 |
| 206416_at   | 0.01909412  | 0.27803306  | 0.781966192 | 0.875346697 |
| 206417_at   | 0.008535859 | 0.200058508 | 0.842127876 | 0.913304837 |
| 206418_at   | -0.02514052 | -1.0778385  | 0.285525346 | 0.463317798 |
| 206419_at   | 0.078079885 | 1.779550722 | 0.080338119 | 0.184344161 |
| 206420_at   | 0.011256706 | 0.436512722 | 0.664069835 | 0.797383371 |
| 206421_s_at | -0.02257285 | -0.83360715 | 0.4078894   | 0.590100773 |
| 206422_at   | 0.02203233  | 1.128617229 | 0.26366134  | 0.438506721 |
| 206423_at   | 0.019841486 | 0.68816606  | 0.494065017 | 0.667614671 |
| 206424_at   | 0.00108346  | 0.025817591 | 0.9794906   | 0.989727317 |
| 206425_s_at | -0.04023463 | -1.15555066 | 0.252557579 | 0.425497516 |
| 206426_at   | -0.00231099 | -0.10371714 | 0.917748176 | 0.956462968 |
| 206427_s_at | -0.02987333 | -0.76483443 | 0.447441122 | 0.627113332 |
| 206428_s_at | -0.04225453 | -1.04475451 | 0.300429564 | 0.479839762 |
| 206429_at   | 0.066333181 | 1.348972368 | 0.182538572 | 0.339422254 |
| 206430_at   | 0.014051905 | 0.329978564 | 0.742593577 | 0.850843258 |
| 206431_x_at | 0.100220941 | 3.272681781 | 0.001789558 | 0.008308637 |
| 206432_at   | -0.00288802 | -0.11151941 | 0.911585797 | 0.953154238 |
| 206433_s_at | -0.45615965 | -4.1863367  | 9.65E-05    | 0.000714723 |
| 206434_at   | -0.58345775 | -4.39847339 | 4.67E-05    | 0.000388436 |
| 206435_at   | -0.25705297 | -5.47734297 | 9.51E-07    | 1.54E-05    |
| 206436_at   | -0.01485349 | -0.40771641 | 0.684968493 | 0.811657897 |
| 206437_at   | 0.010299295 | 0.173000209 | 0.863247775 | 0.925763535 |
| 206438_x_at | -0.01424776 | -0.2900429  | 0.772807885 | 0.869931361 |
| 206439_at   | -0.00626344 | -0.2914293  | 0.771752718 | 0.869271324 |
| 206440_at   | 0.007350314 | 0.178159418 | 0.859212602 | 0.923319378 |
| 206441_s_at | -0.0251163  | -0.69435619 | 0.490204194 | 0.664529417 |
| 206442_at   | 0.021712001 | 0.574416939 | 0.567885566 | 0.727406543 |
| 206443_at   | 0.035717228 | 1.284180023 | 0.204135878 | 0.367147195 |
| 206444_at   | -0.90824176 | -8.61938754 | 5.24E-12    | 4.26E-09    |
| 206445_s_at | -0.22031545 | -4.12998638 | 0.000116708 | 0.000839921 |
| 206446_s_at | 0.056071123 | 2.740256014 | 0.008124923 | 0.029457213 |
| 206447_at   | 0.00536423  | 0.15383976  | 0.878264962 | 0.934828889 |
| 206448_at   | -0.60989441 | -5.70919051 | 3.98E-07    | 7.55E-06    |
| 206449_s_at | 0.058810814 | 1.604001388 | 0.114093513 | 0.240340653 |
| 206450_at   | 0.03474473  | 0.717734647 | 0.475774168 | 0.651711187 |
| 206451_at   | 0.088842449 | 3.982399355 | 0.00019095  | 0.001267102 |
| 206452_x_at | -0.08793888 | -1.9493276  | 0.056050337 | 0.139492241 |
| 206453_s_at | 0.369062601 | 5.45822709  | 1.02E-06    | 1.63E-05    |
| 206454_s_at | -0.06641137 | -1.47345146 | 0.145984059 | 0.288507984 |
| 206455_s_at | -0.02988722 | -0.72365538 | 0.472157951 | 0.648429476 |
| 206456_at   | -1.73548587 | -6.00240996 | 1.31E-07    | 3.12E-06    |
| 206457_s_at | 0.015207357 | 0.345098284 | 0.731256834 | 0.843215089 |
| 206458_s_at | -0.22419903 | -4.80518087 | 1.11E-05    | 0.000116725 |
| 206459_s_at | -0.20758769 | -4.65488366 | 1.90E-05    | 0.000183179 |
| 206460_at   | -0.12181406 | -2.63838348 | 0.010654192 | 0.036683911 |
| 206461_x_at | 0.728141267 | 5.520154512 | 8.11E-07    | 1.35E-05    |
| 206462_s_at | -0.45092501 | -7.05108591 | 2.30E-09    | 1.60E-07    |
| 206463_s_at | 0.023854948 | 0.662052747 | 0.510534188 | 0.68137249  |
| 206464_at   | 0.047328043 | 0.782514704 | 0.437064726 | 0.617622484 |
| 206465_at   | 0.328234334 | 3.937394912 | 0.000221505 | 0.001439091 |
| 206466_at   | 0.025369778 | 0.51769119  | 0.606623783 | 0.756430627 |
| 206467_x_at | 0.136024588 | 2.074132667 | 0.042472425 | 0.112153781 |
| 206468_s_at | -0.02814863 | -0.65034474 | 0.518012718 | 0.687586364 |
| 206469_x_at | 0.123245687 | 3.597432013 | 0.000661338 | 0.003621681 |
| 206470_at   | -0.03142197 | -0.85968107 | 0.393470231 | 0.576291917 |
| 206471_s_at | -0.06276339 | -1.70220294 | 0.094020286 | 0.207771465 |
| 206472_s_at | 0.066148218 | 2.758390551 | 0.007737215 | 0.028287927 |
| 206473_at   | 0.048868578 | 1.629978284 | 0.108473309 | 0.231491221 |



|             |             |             |             |             |
|-------------|-------------|-------------|-------------|-------------|
| 206474_at   | -0.27061634 | -4.43543086 | 4.11E-05    | 0.00034936  |
| 206475_x_at | 0.001749254 | 0.041819542 | 0.966784803 | 0.983173969 |
| 206476_s_at | -0.17270664 | -4.09566297 | 0.000130963 | 0.00092655  |
| 206477_s_at | -0.17038608 | -4.49966434 | 3.28E-05    | 0.000289325 |
| 206478_at   | -0.02137522 | -0.51792989 | 0.606458261 | 0.756308636 |
| 206479_at   | -0.02637912 | -1.16999322 | 0.246742951 | 0.418419122 |
| 206480_at   | -0.05579827 | -1.21146327 | 0.230583389 | 0.398732165 |
| 206481_s_at | -0.96893779 | -8.22048856 | 2.44E-11    | 9.75E-09    |
| 206482_at   | -0.00163029 | -0.08235686 | 0.934643771 | 0.966006786 |
| 206483_at   | 0.111724702 | 1.359863732 | 0.179085234 | 0.334811851 |
| 206484_s_at | -0.01816829 | -0.39304938 | 0.695710098 | 0.819824808 |
| 206485_at   | 0.002886247 | 0.086482591 | 0.931377793 | 0.964326105 |
| 206486_at   | 0.020093335 | 0.501751996 | 0.617723055 | 0.765189689 |
| 206487_at   | 0.060672766 | 2.368117178 | 0.021199642 | 0.064582967 |
| 206488_s_at | 0.208531869 | 2.139197823 | 0.036599218 | 0.099714427 |
| 206489_s_at | -0.24840464 | -6.68202172 | 9.61E-09    | 4.35E-07    |
| 206490_at   | -0.07481756 | -3.62107438 | 0.000613904 | 0.003402357 |
| 206491_s_at | -0.22504243 | -4.2532586  | 7.69E-05    | 0.000591352 |
| 206492_at   | -0.04972739 | -1.19090473 | 0.238495367 | 0.408162135 |
| 206493_at   | 0.031880264 | 0.649889941 | 0.518304393 | 0.687830268 |
| 206494_s_at | 0.030064291 | 1.245410864 | 0.217940532 | 0.384365189 |
| 206495_s_at | -0.02508757 | -0.62572157 | 0.533928496 | 0.700591322 |
| 206496_at   | -0.02903241 | -0.72248852 | 0.472869406 | 0.64898932  |
| 206497_at   | -0.0201607  | -0.91106257 | 0.365997111 | 0.549284491 |
| 206498_at   | -0.08079045 | -1.73598789 | 0.08782456  | 0.19736789  |
| 206499_s_at | 0.034666444 | 0.634068824 | 0.528504788 | 0.696055165 |
| 206500_s_at | 0.020258947 | 0.777250478 | 0.440139305 | 0.620683636 |
| 206501_x_at | -0.23161294 | -4.94369068 | 6.77E-06    | 7.75E-05    |
| 206502_s_at | -0.59382675 | -5.77903382 | 3.06E-07    | 6.08E-06    |
| 206503_x_at | 0.038962283 | 1.149161053 | 0.25516108  | 0.428435172 |
| 206504_at   | -0.00311207 | -0.13455545 | 0.893424724 | 0.942985632 |
| 206505_at   | -0.0275495  | -1.60891924 | 0.113011832 | 0.238635003 |
| 206506_s_at | 0.073286859 | 2.08053222  | 0.041860557 | 0.110837848 |
| 206507_at   | 0.03957973  | 1.860760648 | 0.067800356 | 0.161796961 |
| 206508_at   | -0.01510021 | -0.30990752 | 0.757731343 | 0.860685436 |
| 206509_at   | 0.046395394 | 1.192544941 | 0.237857002 | 0.407275781 |
| 206510_at   | 0.018396781 | 0.565922176 | 0.573608738 | 0.731592183 |
| 206511_s_at | 0.047241239 | 1.403486458 | 0.165751893 | 0.316612541 |
| 206512_at   | 0.110537408 | 1.806218716 | 0.076023153 | 0.17640845  |
| 206513_at   | 0.048174446 | 1.335722008 | 0.186807887 | 0.3447076   |
| 206514_s_at | 0.045052769 | 1.84661804  | 0.069856998 | 0.165459163 |
| 206515_at   | 0.559806842 | 3.428510054 | 0.001117054 | 0.005585518 |
| 206516_at   | -0.06972236 | -1.46579031 | 0.148054042 | 0.291516048 |
| 206517_at   | 0.019326085 | 0.467694279 | 0.641738924 | 0.782369581 |
| 206518_s_at | -1.00951024 | -7.22539982 | 1.17E-09    | 1.04E-07    |
| 206519_x_at | -0.04851157 | -1.26878954 | 0.209535861 | 0.374044443 |
| 206520_x_at | -0.02681819 | -0.66704896 | 0.507360549 | 0.67866225  |
| 206521_s_at | 0.015997723 | 0.353688769 | 0.72484223  | 0.839210366 |
| 206522_at   | 0.01030305  | 0.376822353 | 0.707667511 | 0.827760584 |
| 206523_at   | -0.07165422 | -1.845014   | 0.070093542 | 0.165887556 |
| 206524_at   | 0.035895128 | 0.978754482 | 0.331727121 | 0.514282856 |
| 206525_at   | 0.012754472 | 0.391313655 | 0.696985488 | 0.820661054 |
| 206526_at   | 0.122988625 | 2.518877355 | 0.014524363 | 0.047294924 |
| 206527_at   | -0.21658901 | -3.31160876 | 0.00159262  | 0.007535185 |
| 206528_at   | -0.01680561 | -0.57583761 | 0.566931163 | 0.72682982  |
| 206529_x_at | 0.026775684 | 1.478428477 | 0.144651528 | 0.286666665 |
| 206530_at   | 0.044749734 | 1.091454733 | 0.279542712 | 0.456560549 |
| 206531_at   | -0.29395576 | -4.77328286 | 1.25E-05    | 0.000128247 |
| 206532_at   | -0.01487682 | -0.58826492 | 0.558616295 | 0.720364701 |
| 206533_at   | -0.07657884 | -1.50184138 | 0.138510897 | 0.277870605 |
| 206534_at   | -0.2809599  | -5.39685653 | 1.28E-06    | 1.95E-05    |
| 206535_at   | -0.02844131 | -0.98625257 | 0.328066284 | 0.510602068 |
| 206536_s_at | -0.02021802 | -0.66786275 | 0.506844633 | 0.678314792 |
| 206537_at   | 0.015479869 | 0.66739749  | 0.507139559 | 0.678462299 |
| 206538_at   | 0.037592702 | 0.629045646 | 0.531765196 | 0.698886933 |
| 206539_s_at | 0.031990204 | 0.528588951 | 0.599088142 | 0.75095213  |
| 206540_at   | 0.064190112 | 1.499467957 | 0.13912385  | 0.278709181 |
| 206541_at   | 0.143385939 | 2.152936774 | 0.035453983 | 0.097244961 |
| 206542_s_at | -0.14951894 | -2.35854276 | 0.021704288 | 0.065803408 |
| 206543_at   | -0.02410324 | -1.45681683 | 0.15050778  | 0.294947134 |
| 206544_x_at | -0.37298505 | -4.17284972 | 0.000101002 | 0.000743165 |
| 206545_at   | 0.01433012  | 0.696395864 | 0.488935689 | 0.663332943 |
| 206546_at   | 0.013216225 | 0.721900617 | 0.473228087 | 0.649268732 |
| 206547_s_at | -0.08224636 | -1.73615328 | 0.087795082 | 0.197321488 |
| 206548_at   | 0.241816512 | 5.518635124 | 8.15E-07    | 1.36E-05    |

|             |             |             |             |             |
|-------------|-------------|-------------|-------------|-------------|
| 206549_at   | 0.010849135 | 0.337710112 | 0.736789135 | 0.847100519 |
| 206550_s_at | 0.021473234 | 0.756563977 | 0.452343892 | 0.631675829 |
| 206551_x_at | 0.267538541 | 5.511817325 | 8.36E-07    | 1.38E-05    |
| 206552_s_at | -1.73042253 | -7.09134604 | 1.96E-09    | 1.44E-07    |
| 206553_at   | -0.06018328 | -1.48061551 | 0.144069011 | 0.285848267 |
| 206554_x_at | 0.116326791 | 2.972992179 | 0.004275602 | 0.017343004 |
| 206555_s_at | 0.003846397 | 0.080400556 | 0.9361928   | 0.96684757  |
| 206556_at   | -0.00060803 | -0.02717496 | 0.978412572 | 0.988990245 |
| 206557_at   | -0.16999519 | -3.85781951 | 0.000287405 | 0.001795711 |
| 206558_at   | 0.01418648  | 0.304117961 | 0.762115955 | 0.863127128 |
| 206559_x_at | -0.02950989 | -0.81128265 | 0.420488271 | 0.602496291 |
| 206560_s_at | -0.00284582 | -0.07035126 | 0.944153761 | 0.971186703 |
| 206561_s_at | 0.035008048 | 0.686666762 | 0.495002644 | 0.668356196 |
| 206562_s_at | -0.04616245 | -0.64152537 | 0.523684272 | 0.692297379 |
| 206563_s_at | -0.12338855 | -3.54261124 | 0.000785133 | 0.004167853 |
| 206564_at   | -0.14992939 | -3.65329378 | 0.000554464 | 0.003125251 |
| 206565_x_at | 0.345450293 | 3.84924187  | 0.000295542 | 0.001839095 |
| 206566_at   | -0.06539792 | -1.68269789 | 0.097758077 | 0.213803548 |
| 206567_s_at | 0.034228164 | 0.795365424 | 0.429612739 | 0.610561089 |
| 206568_at   | -0.04462484 | -0.87440224 | 0.385470893 | 0.568094481 |
| 206569_at   | -0.02767153 | -0.68208336 | 0.497875034 | 0.670919072 |
| 206570_s_at | -0.02413603 | -0.67618255 | 0.501586398 | 0.673847937 |
| 206571_s_at | 0.598148849 | 5.884236943 | 2.05E-07    | 4.41E-06    |
| 206572_x_at | 0.013971005 | 0.480375593 | 0.632749846 | 0.775911104 |
| 206573_at   | -0.17546021 | -2.94303984 | 0.004651946 | 0.018584497 |
| 206574_s_at | 0.127437076 | 1.840636085 | 0.07074258  | 0.166946214 |
| 206575_at   | 0.00571339  | 0.146221267 | 0.884248857 | 0.938088398 |
| 206576_s_at | -0.01590711 | -0.26693064 | 0.790460241 | 0.880693269 |
| 206577_at   | 0.011234415 | 0.54086731  | 0.590650359 | 0.744626339 |
| 206578_at   | 0.061615809 | 1.572233883 | 0.121283614 | 0.25156204  |
| 206579_at   | -0.00693769 | -0.15832394 | 0.874746199 | 0.932604234 |
| 206580_s_at | 0.251897672 | 4.673715698 | 1.78E-05    | 0.000172925 |
| 206581_at   | 0.041261485 | 1.234546119 | 0.221929984 | 0.388891324 |
| 206582_s_at | 0.041526826 | 0.424285558 | 0.672912079 | 0.803231394 |
| 206583_at   | -0.10875125 | -2.25318995 | 0.028006561 | 0.080565732 |
| 206584_at   | 0.240095304 | 2.489317368 | 0.015659968 | 0.050394056 |
| 206585_at   | -0.02340661 | -0.96669115 | 0.337673503 | 0.520479537 |
| 206586_at   | 0.00853024  | 0.175741102 | 0.861103577 | 0.92430289  |
| 206587_at   | 0.09148734  | 1.217711937 | 0.228216926 | 0.395681066 |
| 206588_at   | -0.04040701 | -1.64641467 | 0.105034774 | 0.225998464 |
| 206589_at   | -0.01386458 | -0.30760901 | 0.75947113  | 0.861501148 |
| 206590_x_at | -0.55573415 | -9.01558217 | 1.15E-12    | 2.64E-09    |
| 206591_at   | -0.02122846 | -0.96109936 | 0.340453556 | 0.523336899 |
| 206592_s_at | -0.18083543 | -4.48033507 | 3.51E-05    | 0.000307325 |
| 206593_s_at | 0.077061189 | 2.106042508 | 0.039496939 | 0.10582717  |
| 206594_at   | -0.00193571 | -0.06961467 | 0.944737511 | 0.971451783 |
| 206595_at   | 0.005710195 | 0.141395171 | 0.888043014 | 0.939882501 |
| 206596_s_at | -0.01166296 | -0.40229331 | 0.688932712 | 0.81466767  |
| 206597_at   | 0.020370463 | 0.541675323 | 0.590097058 | 0.744274362 |
| 206598_at   | -0.09530942 | -1.82821825 | 0.072611118 | 0.170321528 |
| 206599_at   | 0.018704224 | 0.622563622 | 0.5359879   | 0.702248786 |
| 206600_s_at | 0.107632367 | 3.403784912 | 0.001204753 | 0.005955405 |
| 206601_s_at | -0.01898022 | -0.58161336 | 0.563059159 | 0.723879986 |
| 206602_s_at | -0.0089056  | -0.1872193  | 0.85213578  | 0.918918354 |
| 206603_at   | 0.017366306 | 0.420421842 | 0.675715927 | 0.805175688 |
| 206604_at   | 0.043265459 | 1.065181602 | 0.291165574 | 0.469588678 |
| 206605_at   | 0.067729309 | 1.362903061 | 0.1781305   | 0.333585095 |
| 206606_at   | 0.001937854 | 0.044156827 | 0.964929607 | 0.982069457 |
| 206607_at   | -0.0710541  | -1.61760759 | 0.1111211   | 0.235701195 |
| 206608_s_at | 0.029716158 | 0.706804761 | 0.482490583 | 0.657559492 |
| 206609_at   | 0.011117305 | 0.461842482 | 0.645905277 | 0.785154933 |
| 206610_s_at | -0.03643637 | -0.65941791 | 0.512212136 | 0.683010646 |
| 206611_at   | -0.07136105 | -1.66072257 | 0.102114254 | 0.221162599 |
| 206612_at   | -0.04710799 | -1.49896087 | 0.139255086 | 0.278872083 |
| 206613_s_at | 0.032488229 | 1.169021893 | 0.247130967 | 0.41888638  |
| 206614_at   | 0.008585454 | 0.249508944 | 0.803840168 | 0.889577278 |
| 206615_s_at | -0.00304584 | -0.14580368 | 0.884577044 | 0.938369743 |
| 206616_s_at | -0.0439423  | -1.12036978 | 0.267129593 | 0.442441631 |
| 206617_s_at | 0.008669026 | 0.201030804 | 0.841371033 | 0.912816289 |
| 206618_at   | -0.00406681 | -0.12672032 | 0.899595821 | 0.946244733 |
| 206619_at   | -0.01818704 | -0.54811766 | 0.585694344 | 0.740919945 |
| 206620_at   | -0.07082772 | -1.67988789 | 0.098306468 | 0.21477868  |
| 206621_s_at | -0.16240092 | -3.49673493 | 0.00090539  | 0.004691985 |
| 206622_at   | -0.01666884 | -0.37687763 | 0.707626651 | 0.827734454 |
| 206623_at   | 0.022076603 | 0.41016649  | 0.683180424 | 0.810552431 |

|             |             |             |             |             |
|-------------|-------------|-------------|-------------|-------------|
| 206624_at   | -0.15150332 | -2.06157276 | 0.043695875 | 0.114785668 |
| 206625_at   | -0.02844901 | -0.69892234 | 0.487366955 | 0.66172694  |
| 206626_x_at | -0.00623694 | -0.1885585  | 0.851090726 | 0.918250567 |
| 206627_s_at | 0.023429602 | 1.198633553 | 0.235498162 | 0.404468851 |
| 206628_at   | 0.016239255 | 0.363698354 | 0.717392912 | 0.834614709 |
| 206629_at   | -0.05963894 | -1.20200345 | 0.234199924 | 0.403065869 |
| 206630_at   | -0.01446626 | -0.36381515 | 0.717306149 | 0.834535493 |
| 206631_at   | -0.08094872 | -1.94364418 | 0.056748367 | 0.140829475 |
| 206632_s_at | 0.003366308 | 0.147709914 | 0.883079066 | 0.937448209 |
| 206633_at   | -0.05119482 | -1.24172463 | 0.219288121 | 0.386108176 |
| 206634_at   | -0.41614607 | -4.87420807 | 8.70E-06    | 9.51E-05    |
| 206635_at   | 0.056909865 | 1.086246079 | 0.281820862 | 0.459039944 |
| 206636_at   | 0.013678688 | 0.354777802 | 0.72403044  | 0.838669062 |
| 206637_at   | 0.266917657 | 4.244702015 | 7.92E-05    | 0.000605408 |
| 206638_at   | -0.055523   | -1.99483976 | 0.05072066  | 0.128935086 |
| 206639_x_at | -0.02026299 | -0.81468191 | 0.418554897 | 0.601050911 |
| 206640_x_at | -0.06124644 | -0.56011042 | 0.577540377 | 0.734615053 |
| 206641_at   | -0.0425082  | -1.21216751 | 0.23031579  | 0.398331074 |
| 206642_at   | -0.00293273 | -0.14573991 | 0.884627167 | 0.9383907   |
| 206643_at   | -0.0189806  | -0.41941454 | 0.67644767  | 0.805837461 |
| 206644_at   | -0.0268527  | -1.18471697 | 0.240914786 | 0.411062635 |
| 206645_s_at | 0.010163093 | 0.303428166 | 0.762638884 | 0.863538308 |
| 206646_at   | 0.044101938 | 0.724352132 | 0.471733416 | 0.648041073 |
| 206647_at   | 0.057487065 | 1.600595919 | 0.114847434 | 0.241581407 |
| 206648_at   | 0.061121649 | 2.48772586  | 0.015723323 | 0.050554443 |
| 206649_s_at | 0.088959903 | 2.443947792 | 0.017559231 | 0.055436364 |
| 206650_at   | -0.06428735 | -0.94616655 | 0.347951153 | 0.53096506  |
| 206651_s_at | -0.0379609  | -1.08554692 | 0.28212764  | 0.459439166 |
| 206652_at   | 0.098735495 | 4.233942808 | 8.21E-05    | 0.000624157 |
| 206653_at   | -0.0011478  | -0.02946063 | 0.976597384 | 0.98827608  |
| 206654_s_at | 0.002800418 | 0.146599035 | 0.88395198  | 0.937993605 |
| 206655_s_at | -0.89353924 | -6.54984174 | 1.60E-08    | 6.31E-07    |
| 206656_s_at | -0.04870832 | -0.94618878 | 0.347939908 | 0.53096506  |
| 206657_s_at | -0.04692458 | -1.18990235 | 0.238886099 | 0.408599545 |
| 206658_at   | -0.00138498 | -0.04643803 | 0.963119113 | 0.981137201 |
| 206659_at   | -0.18140242 | -4.65751443 | 1.89E-05    | 0.000181834 |
| 206660_at   | 0.0193492   | 0.458806129 | 0.648071604 | 0.786466225 |
| 206661_at   | 0.002831222 | 0.084366396 | 0.933052853 | 0.965277734 |
| 206662_at   | 0.035985003 | 0.239042615 | 0.811907074 | 0.894495677 |
| 206663_at   | 0.036479814 | 0.638273921 | 0.525783425 | 0.694149636 |
| 206664_at   | 0.001246038 | 0.066261877 | 0.947395014 | 0.972997931 |
| 206665_s_at | 0.022160567 | 0.436364922 | 0.664176436 | 0.797447097 |
| 206666_at   | 0.006947469 | 0.137398916 | 0.891186766 | 0.941782388 |
| 206667_s_at | -0.28996383 | -2.79040413 | 0.007094026 | 0.02633493  |
| 206668_s_at | -0.4474365  | -4.52946211 | 2.96E-05    | 0.000265409 |
| 206669_at   | 0.003490483 | 0.102745687 | 0.918515814 | 0.956991154 |
| 206670_s_at | -0.67139714 | -5.3480365  | 1.54E-06    | 2.28E-05    |
| 206671_at   | -0.13192271 | -2.87721078 | 0.005589627 | 0.021600885 |
| 206672_at   | -0.01587974 | -0.51947595 | 0.605386671 | 0.755468788 |
| 206673_at   | -0.18492466 | -3.9160422  | 0.0002376   | 0.001527666 |
| 206674_at   | -0.04320117 | -1.11012325 | 0.271483163 | 0.447403132 |
| 206675_s_at | 0.020846164 | 1.193375192 | 0.237534344 | 0.406941576 |
| 206676_at   | -0.02033544 | -0.89305908 | 0.37548056  | 0.558416598 |
| 206677_at   | -0.02763738 | -0.89660135 | 0.373602443 | 0.556716471 |
| 206678_at   | -0.81048507 | -5.63046612 | 5.36E-07    | 9.58E-06    |
| 206679_at   | -0.23250408 | -3.85212876 | 0.000292779 | 0.001824187 |
| 206680_at   | 0.001163783 | 0.028627484 | 0.977259021 | 0.988596431 |
| 206681_x_at | -0.03860552 | -0.89759875 | 0.373074698 | 0.556122061 |
| 206682_at   | -0.01234512 | -0.28335279 | 0.777905626 | 0.872598985 |
| 206683_at   | 0.021823286 | 1.070852255 | 0.288629156 | 0.46682883  |
| 206684_s_at | -0.00948148 | -0.22643704 | 0.821649983 | 0.90086799  |
| 206685_at   | -0.11165414 | -3.38209545 | 0.001287019 | 0.006299359 |
| 206686_at   | -0.04845831 | -0.9554014  | 0.343301819 | 0.526268948 |
| 206687_s_at | 0.145911148 | 2.991196629 | 0.004060911 | 0.016597186 |
| 206688_s_at | 0.127734281 | 4.293924195 | 6.69E-05    | 0.000525049 |
| 206689_x_at | 0.085631495 | 2.694096392 | 0.009193618 | 0.032619115 |
| 206690_at   | -0.27949785 | -4.69326269 | 1.66E-05    | 0.000163186 |
| 206691_s_at | 0.007765771 | 0.145446175 | 0.884858035 | 0.9383907   |
| 206692_at   | -0.20429222 | -2.54493101 | 0.013585785 | 0.044783588 |
| 206693_at   | 0.018584569 | 1.11909052  | 0.26767042  | 0.442932702 |
| 206694_at   | -0.01024778 | -0.19744344 | 0.844164204 | 0.914372314 |
| 206695_x_at | -0.03960548 | -0.89407246 | 0.374942654 | 0.558118076 |
| 206696_at   | -0.01526873 | -0.37700546 | 0.707532158 | 0.827688913 |
| 206697_s_at | 0.102665392 | 2.185904466 | 0.032832989 | 0.091544822 |
| 206698_at   | -0.46192841 | -4.83490592 | 1.00E-05    | 0.000107013 |

|             |             |             |             |             |
|-------------|-------------|-------------|-------------|-------------|
| 206699_x_at | -0.00535559 | -0.17270643 | 0.86347766  | 0.925921195 |
| 206700_s_at | 0.034574776 | 0.329343858 | 0.743070753 | 0.851128149 |
| 206701_x_at | -0.19689506 | -2.02943679 | 0.04696606  | 0.121466717 |
| 206702_at   | 0.156321995 | 3.214523659 | 0.002126995 | 0.009600045 |
| 206703_at   | 0.002635139 | 0.05265468  | 0.958186241 | 0.97865248  |
| 206704_at   | -0.01369509 | -0.47997045 | 0.633036177 | 0.776148003 |
| 206705_at   | -0.03667149 | -0.5567216  | 0.579838896 | 0.736433138 |
| 206706_at   | 0.061775447 | 1.416548617 | 0.161912168 | 0.310979355 |
| 206707_x_at | -0.00671451 | -0.13413524 | 0.893755526 | 0.943203428 |
| 206708_at   | 0.104903327 | 2.695543942 | 0.009158237 | 0.032512504 |
| 206709_x_at | 0.139163302 | 4.245086551 | 7.90E-05    | 0.00060503  |
| 206710_s_at | -0.15617989 | -1.52317564 | 0.133096542 | 0.269815416 |
| 206711_at   | -0.48411013 | -6.19105018 | 6.37E-08    | 1.77E-06    |
| 206712_at   | 0.072240783 | 2.102039496 | 0.039859968 | 0.106595363 |
| 206713_at   | 0.016947015 | 0.301431698 | 0.764153017 | 0.864376782 |
| 206714_at   | -0.00441829 | -0.08275786 | 0.934326283 | 0.965812658 |
| 206715_at   | 0.062063958 | 1.834168796 | 0.071710618 | 0.168776183 |
| 206716_at   | -0.01336751 | -0.29580489 | 0.768425387 | 0.867402967 |
| 206717_at   | 0.041502738 | 1.728763443 | 0.089120256 | 0.199527226 |
| 206718_at   | 0.014351612 | 0.34442775  | 0.731758347 | 0.843495741 |
| 206719_at   | -0.0288702  | -0.69160867 | 0.49191578  | 0.665917243 |
| 206720_at   | 0.039522292 | 1.207616794 | 0.232048973 | 0.40041439  |
| 206721_at   | 0.010447175 | 0.172033326 | 0.864004414 | 0.926255993 |
| 206722_s_at | 0.061320855 | 1.846243917 | 0.069912109 | 0.165545829 |
| 206723_s_at | 0.047578949 | 1.47981144  | 0.14428296  | 0.286145731 |
| 206724_at   | -0.120153   | -2.19078943 | 0.03245946  | 0.090707072 |
| 206725_x_at | -0.06101688 | -1.10913062 | 0.271907552 | 0.447808191 |
| 206726_at   | -0.00892773 | -0.25369565 | 0.800619213 | 0.887322352 |
| 206727_at   | -0.00171573 | -0.07157844 | 0.943181278 | 0.970700235 |
| 206728_at   | -0.22097217 | -4.56441581 | 2.62E-05    | 0.000239712 |
| 206729_at   | -0.13894632 | -3.69091679 | 0.000492009 | 0.002826522 |
| 206730_at   | -0.54205553 | -6.67095333 | 1.00E-08    | 4.49E-07    |
| 206731_at   | -0.76159957 | -6.39592671 | 2.90E-08    | 9.72E-07    |
| 206732_at   | -0.68238077 | -7.02704148 | 2.52E-09    | 1.71E-07    |
| 206733_at   | -0.00387194 | -0.09694952 | 0.923097495 | 0.959773231 |
| 206734_at   | 0.153171893 | 4.149786002 | 0.00010918  | 0.000793279 |
| 206735_at   | 0.019402179 | 0.485937665 | 0.628824585 | 0.773027874 |
| 206736_x_at | -0.05039941 | -1.29890067 | 0.19906875  | 0.360587711 |
| 206737_at   | -0.03714062 | -0.86495817 | 0.390590917 | 0.573429051 |
| 206738_at   | -0.00684889 | -0.14200369 | 0.887564464 | 0.939576271 |
| 206739_at   | 0.052188393 | 1.814048099 | 0.074793777 | 0.174276273 |
| 206740_x_at | -0.0369054  | -1.15767229 | 0.251697318 | 0.42462549  |
| 206741_at   | -0.07976096 | -1.5385391  | 0.129302611 | 0.264125064 |
| 206742_at   | 0.016744127 | 0.406074048 | 0.686168109 | 0.81254428  |
| 206743_s_at | -0.04108969 | -1.08341523 | 0.283064419 | 0.460469215 |
| 206744_s_at | 0.024970538 | 1.029394124 | 0.307527124 | 0.487877684 |
| 206745_at   | -0.01560969 | -0.38143056 | 0.704264123 | 0.825611069 |
| 206746_at   | -0.09157805 | -2.23314965 | 0.029373932 | 0.083701848 |
| 206747_at   | -0.04695855 | -1.2702283  | 0.209026598 | 0.373347985 |
| 206748_s_at | -0.03650278 | -0.4322158  | 0.667171828 | 0.79956139  |
| 206749_at   | -0.05367591 | -1.07179226 | 0.288210183 | 0.466336827 |
| 206750_at   | 0.021763275 | 0.545712776 | 0.58733602  | 0.742195306 |
| 206751_s_at | -0.00027541 | -0.00690965 | 0.994510425 | 0.997389312 |
| 206752_s_at | -0.04204782 | -0.70710503 | 0.482305367 | 0.657419604 |
| 206753_at   | 0.024727954 | 0.548465249 | 0.585457247 | 0.740804956 |
| 206754_s_at | 0.114263223 | 2.518589995 | 0.014535034 | 0.04731933  |
| 206755_at   | -0.0010562  | -0.03162645 | 0.974877483 | 0.987270274 |
| 206756_at   | 0.078427909 | 1.230358964 | 0.223481716 | 0.390607932 |
| 206757_at   | -0.00875746 | -0.37934724 | 0.705802008 | 0.826635459 |
| 206758_at   | -0.03527112 | -1.23080371 | 0.223316517 | 0.390487178 |
| 206759_at   | 0.007872544 | 0.201655722 | 0.840884671 | 0.912511783 |
| 206760_s_at | -0.0413483  | -0.93742545 | 0.352389559 | 0.535631121 |
| 206761_at   | -0.03109932 | -1.03128407 | 0.306647746 | 0.486834638 |
| 206762_at   | -0.02411629 | -0.45643039 | 0.649768745 | 0.787852756 |
| 206763_at   | -0.03883597 | -0.96228544 | 0.339862622 | 0.522736012 |
| 206764_x_at | 0.018897652 | 0.481544006 | 0.631924389 | 0.775366923 |
| 206765_at   | 0.095716655 | 1.208872571 | 0.231569752 | 0.399896266 |
| 206766_at   | 0.085255464 | 2.090858662 | 0.04088937  | 0.108820803 |
| 206767_at   | 0.091525025 | 1.616690401 | 0.111319479 | 0.236032363 |
| 206768_at   | -0.03899989 | -0.92149237 | 0.360573901 | 0.543719845 |
| 206769_at   | 0.018250462 | 0.479995145 | 0.633018725 | 0.776148003 |
| 206770_s_at | -0.00326532 | -0.0797126  | 0.936737592 | 0.967186703 |
| 206771_at   | -0.03308306 | -0.91626866 | 0.363283589 | 0.546349569 |
| 206772_at   | -0.01959254 | -0.54625024 | 0.586968935 | 0.741857291 |
| 206773_at   | -0.38501552 | -2.88209573 | 0.005514445 | 0.021350738 |

|             |             |             |             |             |
|-------------|-------------|-------------|-------------|-------------|
| 206774_at   | -0.15926743 | -3.31784802 | 0.001563023 | 0.00741478  |
| 206775_at   | 0.033065597 | 0.824111847 | 0.413219661 | 0.595460537 |
| 206776_x_at | -0.0803384  | -1.89484389 | 0.063052964 | 0.152950666 |
| 206777_s_at | -0.0445262  | -0.46171252 | 0.645997935 | 0.785161905 |
| 206778_at   | 0.03857256  | 1.064268948 | 0.291575226 | 0.470026899 |
| 206779_s_at | -0.03277667 | -0.94957762 | 0.346229068 | 0.529303876 |
| 206780_at   | -0.87556007 | -6.49125231 | 2.01E-08    | 7.42E-07    |
| 206781_at   | -0.00148576 | -0.02843774 | 0.97740971  | 0.988644845 |
| 206782_s_at | -0.02204069 | -0.49901033 | 0.619641371 | 0.766609792 |
| 206783_at   | 0.000925937 | 0.02106683  | 0.983263956 | 0.991830287 |
| 206784_at   | -0.01834153 | -0.52200956 | 0.603632492 | 0.754384479 |
| 206785_s_at | 0.073872278 | 1.161384408 | 0.250197203 | 0.422672968 |
| 206786_at   | -0.00747178 | -0.3030069  | 0.7629583   | 0.863681164 |
| 206787_at   | 0.008298069 | 0.254254751 | 0.800189339 | 0.8869779   |
| 206788_s_at | 0.13773142  | 2.674692165 | 0.009680131 | 0.034000174 |
| 206789_s_at | 0.270021547 | 5.689283077 | 4.30E-07    | 8.03E-06    |
| 206790_s_at | -0.22181313 | -3.41901302 | 0.001149998 | 0.005721443 |
| 206791_s_at | -0.07664962 | -1.81051792 | 0.075346011 | 0.175255748 |
| 206792_x_at | 0.323914514 | 5.100210281 | 3.83E-06    | 4.85E-05    |
| 206793_at   | 0.146057515 | 1.651437223 | 0.104001919 | 0.224337747 |
| 206794_at   | -0.04954464 | -1.45277373 | 0.151623678 | 0.296506757 |
| 206795_at   | 0.03446697  | 1.223781364 | 0.225935382 | 0.393427657 |
| 206796_at   | 0.018203867 | 0.679202215 | 0.499685282 | 0.672416261 |
| 206797_at   | -0.02695862 | -0.52844002 | 0.599190832 | 0.751006243 |
| 206798_x_at | 0.174119691 | 2.282668477 | 0.026097482 | 0.076321729 |
| 206799_at   | 0.348457249 | 3.517268733 | 0.000849545 | 0.004447448 |
| 206800_at   | -0.04647822 | -1.03522381 | 0.30482011  | 0.484833819 |
| 206801_at   | -0.05084603 | -1.09342241 | 0.278685443 | 0.455543316 |
| 206802_at   | -0.01305109 | -0.31065087 | 0.757168958 | 0.860369387 |
| 206803_at   | -1.14683245 | -6.29753835 | 4.24E-08    | 1.29E-06    |
| 206804_at   | -0.02679135 | -0.46922242 | 0.640652819 | 0.781601251 |
| 206805_at   | -0.16361067 | -3.37731608 | 0.001305848 | 0.006376157 |
| 206806_at   | -1.03423124 | -8.17242993 | 2.94E-11    | 1.08E-08    |
| 206807_s_at | 0.006513264 | 0.115035192 | 0.908810725 | 0.951712239 |
| 206808_at   | 4.01E-05    | 0.002072013 | 0.998353815 | 0.999150356 |
| 206809_s_at | -0.12225371 | -2.6699123  | 0.009803533 | 0.034345027 |
| 206810_at   | -0.01250202 | -0.43440711 | 0.665589164 | 0.798521178 |
| 206811_at   | 0.331293293 | 4.820381167 | 1.06E-05    | 0.00011161  |
| 206812_at   | -0.02825568 | -0.70672594 | 0.482539207 | 0.657589335 |
| 206813_at   | 0.0485821   | 0.967477154 | 0.337283932 | 0.520058427 |
| 206814_at   | -0.0510943  | -0.80404676 | 0.424621656 | 0.606028967 |
| 206815_at   | 0.347766036 | 3.466115972 | 0.000995183 | 0.005073776 |
| 206816_s_at | 0.147462974 | 2.320901134 | 0.023793794 | 0.070940111 |
| 206817_x_at | -0.15756682 | -3.71877754 | 0.000450156 | 0.002620262 |
| 206818_s_at | 0.089698955 | 2.289852873 | 0.025650062 | 0.075218207 |
| 206819_at   | 0.088549085 | 2.232374547 | 0.029427982 | 0.083802432 |
| 206820_at   | -0.07849155 | -1.63336442 | 0.107757545 | 0.230403799 |
| 206821_x_at | -0.04048701 | -1.14279557 | 0.257773728 | 0.431508856 |
| 206822_s_at | 0.047149222 | 1.270222189 | 0.209028759 | 0.373347985 |
| 206823_at   | -0.02257384 | -0.62337608 | 0.53545768  | 0.701820477 |
| 206824_at   | 0.023884339 | 0.36718971  | 0.714801009 | 0.83271757  |
| 206825_at   | 0.023801646 | 0.267331765 | 0.7901529   | 0.880523835 |
| 206826_at   | 0.740293982 | 5.868681035 | 2.18E-07    | 4.61E-06    |
| 206827_s_at | 0.008929247 | 0.142366909 | 0.887278843 | 0.939451932 |
| 206828_at   | 0.016978939 | 0.581035088 | 0.563446236 | 0.724204665 |
| 206829_x_at | -0.03140965 | -0.52962375 | 0.598374862 | 0.750440513 |
| 206830_at   | 0.025616598 | 1.44968131  | 0.152481543 | 0.297650367 |
| 206831_s_at | 0.071634483 | 2.131348193 | 0.037267945 | 0.101097358 |
| 206832_s_at | -0.03376588 | -1.28919459 | 0.202399065 | 0.364891413 |
| 206833_s_at | -0.42165603 | -6.10547065 | 8.84E-08    | 2.29E-06    |
| 206834_at   | -0.02123246 | -0.3432438  | 0.732644144 | 0.844028391 |
| 206835_at   | -0.00999302 | -0.13980318 | 0.889295179 | 0.940719142 |
| 206836_at   | 0.016513889 | 0.528804835 | 0.598939302 | 0.750811653 |
| 206837_at   | -0.05622156 | -1.1094715  | 0.27176176  | 0.447713675 |
| 206838_at   | 0.070191019 | 2.082641316 | 0.041660588 | 0.110423762 |
| 206839_at   | 0.027478885 | 0.602286253 | 0.549308465 | 0.712494019 |
| 206840_at   | 0.022023817 | 0.700812811 | 0.486194953 | 0.660878519 |
| 206841_at   | -0.03506741 | -1.14635709 | 0.256309602 | 0.429846851 |
| 206842_at   | 0.170039858 | 4.145925947 | 0.00011061  | 0.000801843 |
| 206843_at   | -0.00446656 | -0.11308275 | 0.910351682 | 0.952725496 |
| 206844_at   | 0.004976094 | 0.123620922 | 0.902038712 | 0.947960435 |
| 206845_s_at | 0.038389442 | 1.346415846 | 0.183356464 | 0.340419039 |
| 206846_s_at | 0.077242595 | 2.474866633 | 0.01624377  | 0.051951236 |
| 206847_s_at | -0.02186442 | -0.71721211 | 0.476094064 | 0.652046945 |
| 206848_at   | 0.287760652 | 5.85021801  | 2.34E-07    | 4.88E-06    |

|             |             |             |             |             |
|-------------|-------------|-------------|-------------|-------------|
| 206849_at   | -0.88490225 | -6.90131321 | 4.11E-09    | 2.40E-07    |
| 206850_at   | -0.02846367 | -0.53991579 | 0.591302239 | 0.745226578 |
| 206851_at   | 0.068293866 | 1.760047408 | 0.08362144  | 0.189879554 |
| 206852_at   | -0.14998928 | -4.80537589 | 1.11E-05    | 0.000116698 |
| 206853_s_at | 0.02673925  | 0.79789156  | 0.428156816 | 0.609400123 |
| 206854_s_at | 0.154824827 | 2.035876774 | 0.046294294 | 0.12016405  |
| 206855_s_at | 0.143016615 | 2.329400496 | 0.023306938 | 0.069725795 |
| 206856_at   | 0.019643248 | 0.534092801 | 0.595298922 | 0.748150301 |
| 206857_s_at | -1.07903394 | -7.29501591 | 8.90E-10    | 8.72E-08    |
| 206858_s_at | 0.231044144 | 5.060203665 | 4.43E-06    | 5.47E-05    |
| 206859_s_at | 0.028140182 | 0.805565016 | 0.423752365 | 0.605310215 |
| 206860_s_at | -0.08013965 | -1.63506906 | 0.107398669 | 0.229801375 |
| 206861_s_at | 0.002013307 | 0.045363251 | 0.963972096 | 0.98147095  |
| 206862_at   | -0.01406918 | -0.5613457  | 0.576703625 | 0.733928979 |
| 206863_x_at | -0.01596406 | -0.32726309 | 0.744635802 | 0.852090927 |
| 206864_s_at | 0.056954904 | 1.616075708 | 0.111452591 | 0.236258559 |
| 206865_at   | -0.03596339 | -1.06603322 | 0.290783678 | 0.469158994 |
| 206866_at   | -0.14605024 | -2.30618525 | 0.02465817  | 0.072894758 |
| 206867_at   | -0.00785866 | -0.18295833 | 0.85546261  | 0.920856171 |
| 206868_at   | 0.034774488 | 0.61137545  | 0.543316944 | 0.707927723 |
| 206869_at   | -0.13660048 | -3.82708488 | 0.000317598 | 0.001952149 |
| 206870_at   | 0.059359709 | 1.805576971 | 0.076124666 | 0.176561097 |
| 206871_at   | -0.00844591 | -0.26317394 | 0.793340192 | 0.88237728  |
| 206872_at   | -0.03951018 | -0.88170453 | 0.381540986 | 0.564275117 |
| 206873_at   | -0.01721586 | -0.36479493 | 0.716578476 | 0.833954377 |
| 206874_s_at | -0.48628502 | -5.22794605 | 2.40E-06    | 3.28E-05    |
| 206875_s_at | -0.20165671 | -1.63034637 | 0.108395315 | 0.231380018 |
| 206876_at   | -0.02535246 | -0.7791059  | 0.439054194 | 0.61950816  |
| 206877_at   | 0.001736489 | 0.066689023 | 0.947056415 | 0.972761952 |
| 206878_at   | 0.007666295 | 0.178614178 | 0.8588571   | 0.923054823 |
| 206879_s_at | -0.04066509 | -1.00503753 | 0.319013263 | 0.500468294 |
| 206880_at   | -0.0227071  | -0.50957429 | 0.612264581 | 0.760832161 |
| 206881_s_at | 0.034549334 | 1.091820728 | 0.279383118 | 0.456366604 |
| 206882_at   | -0.48410873 | -6.19415448 | 6.30E-08    | 1.76E-06    |
| 206883_x_at | 0.070542232 | 1.605522824 | 0.113757984 | 0.239837335 |
| 206884_s_at | -0.00492266 | -0.2458014  | 0.806695353 | 0.891227565 |
| 206885_x_at | 0.050071542 | 1.338968838 | 0.185754811 | 0.343460124 |
| 206886_x_at | 0.048770967 | 1.496754602 | 0.139827217 | 0.279779636 |
| 206887_at   | 0.023233108 | 0.441070979 | 0.660785621 | 0.795057163 |
| 206888_s_at | -0.31774971 | -4.21885477 | 8.64E-05    | 0.000651561 |
| 206889_at   | -0.08116545 | -1.33730929 | 0.186292504 | 0.344052695 |
| 206890_at   | 0.017276716 | 0.409013496 | 0.684021655 | 0.811055285 |
| 206891_at   | -0.03280571 | -0.79786867 | 0.428169992 | 0.609400123 |
| 206892_at   | -0.02252514 | -0.45386454 | 0.651603782 | 0.788836478 |
| 206893_at   | 0.336586107 | 2.766785975 | 0.007563547 | 0.027755155 |
| 206894_at   | 0.014672355 | 0.29986906  | 0.765338777 | 0.865190585 |
| 206895_at   | -0.00881337 | -0.3207649  | 0.749530349 | 0.85558874  |
| 206896_s_at | -0.79779379 | -8.5758149  | 6.20E-12    | 4.50E-09    |
| 206897_at   | 0.006000131 | 0.254663224 | 0.799875319 | 0.886783781 |
| 206898_at   | 0.558418922 | 3.680860346 | 0.00050801  | 0.002904438 |
| 206899_at   | 0.296009543 | 3.113048795 | 0.002863022 | 0.012342451 |
| 206900_x_at | -0.09590993 | -2.69095458 | 0.009270841 | 0.032834014 |
| 206901_at   | -0.03754824 | -1.00803972 | 0.317582113 | 0.498941182 |
| 206902_s_at | -0.00907798 | -0.53407257 | 0.59531283  | 0.748150301 |
| 206903_at   | 0.0029462   | -0.09580495 | 0.924002555 | 0.960226996 |
| 206904_at   | 0.018622367 | 0.356134871 | 0.723019295 | 0.838099194 |
| 206905_s_at | 0.024250834 | 0.758618583 | 0.451123011 | 0.630463416 |
| 206906_at   | -0.57084662 | -5.97603531 | 1.45E-07    | 3.36E-06    |
| 206907_at   | -0.0213164  | -0.9088956  | 0.367130392 | 0.550320023 |
| 206908_s_at | 0.074073081 | 1.381493629 | 0.172375099 | 0.325637973 |
| 206909_at   | 0.042986865 | 1.90652844  | 0.061491678 | 0.149911961 |
| 206910_x_at | 0.021366544 | 0.515533924 | 0.60812064  | 0.757641914 |
| 206911_at   | 0.005054422 | 0.10636723  | 0.9156545   | 0.95512734  |
| 206912_at   | -0.00064127 | -0.0250574  | 0.980094366 | 0.990022688 |
| 206913_at   | -0.03627874 | -0.68642378 | 0.495154691 | 0.66842219  |
| 206914_at   | 0.001910566 | 0.09208515  | 0.92694465  | 0.961719062 |
| 206915_at   | 0.377170741 | 3.241820621 | 0.001961775 | 0.008964792 |
| 206916_x_at | 0.016009098 | 0.634346792 | 0.528324672 | 0.695977488 |
| 206917_at   | 0.067370688 | 1.116817843 | 0.268633138 | 0.444114682 |
| 206918_s_at | 0.194762169 | 3.605721362 | 0.000644323 | 0.003545004 |
| 206919_at   | -0.02521135 | -0.63101308 | 0.530486945 | 0.69771991  |
| 206920_s_at | -0.08072815 | -2.0323855  | 0.046657438 | 0.120867971 |
| 206921_at   | -0.06341161 | -1.65999809 | 0.102260524 | 0.221393563 |
| 206922_at   | 0.01415056  | 0.239443195 | 0.811597944 | 0.894432849 |
| 206923_at   | -0.06641963 | -2.00080336 | 0.050055635 | 0.127549258 |

|             |             |             |             |             |
|-------------|-------------|-------------|-------------|-------------|
| 206924_at   | 0.014791733 | 0.510850056 | 0.611376422 | 0.760204535 |
| 206925_at   | 0.002562518 | 0.069240906 | 0.945033736 | 0.971622254 |
| 206926_s_at | -0.06427736 | -1.45487744 | 0.151042249 | 0.295770941 |
| 206927_s_at | -0.14096417 | -3.34886421 | 0.001423447 | 0.006859756 |
| 206928_at   | 0.160930949 | 2.950039179 | 0.004561343 | 0.018301063 |
| 206929_s_at | 0.10204398  | 2.415838724 | 0.018837451 | 0.058704649 |
| 206930_at   | -0.03457603 | -0.83416383 | 0.40757821  | 0.589830536 |
| 206931_at   | 0.014154752 | 0.459466709 | 0.647600043 | 0.78620436  |
| 206932_at   | 0.336099511 | 2.239781776 | 0.028915029 | 0.082705311 |
| 206933_s_at | -0.03343545 | -0.8716687  | 0.386948518 | 0.569614728 |
| 206934_at   | -0.02915133 | -0.78625563 | 0.434887561 | 0.615550116 |
| 206935_at   | -1.29483934 | -5.85243855 | 2.32E-07    | 4.84E-06    |
| 206936_x_at | -0.04773231 | -1.47199101 | 0.146376901 | 0.289041508 |
| 206937_at   | -0.02301958 | -0.72653606 | 0.470404142 | 0.647050012 |
| 206938_at   | -0.06987156 | -1.3390131  | 0.185740485 | 0.343460124 |
| 206939_at   | -0.19446486 | -3.1317894  | 0.002711243 | 0.011800824 |
| 206940_s_at | 0.091209367 | 3.025926482 | 0.0036789   | 0.01527191  |
| 206941_x_at | 0.002287228 | 0.084936029 | 0.932601933 | 0.965056973 |
| 206942_s_at | 0.092287123 | 3.434838721 | 0.001095599 | 0.005492989 |
| 206943_at   | 0.066040617 | 2.393993197 | 0.019887833 | 0.061308349 |
| 206944_at   | -0.14393631 | -3.90794015 | 0.000243996 | 0.001561828 |
| 206945_at   | 0.033665168 | 0.71655803  | 0.476494665 | 0.652295756 |
| 206946_at   | 0.023331815 | 0.563839611 | 0.575016092 | 0.732592696 |
| 206947_at   | -0.02532512 | -0.5736018  | 0.568433529 | 0.727712153 |
| 206948_at   | 0.066266498 | 1.795815913 | 0.077682726 | 0.17943955  |
| 206949_s_at | -0.21484425 | -4.77999322 | 1.22E-05    | 0.000125758 |
| 206950_at   | 0.035777418 | 1.523539141 | 0.133005767 | 0.269680325 |
| 206951_at   | 0.060343391 | 1.672372176 | 0.099785605 | 0.217247139 |
| 206952_at   | -0.00312307 | -0.15326068 | 0.878719553 | 0.93501563  |
| 206953_s_at | -0.26007371 | -5.14584592 | 3.24E-06    | 4.22E-05    |
| 206954_at   | -0.01155665 | -0.29449019 | 0.76942467  | 0.867945363 |
| 206955_at   | -0.04575126 | -1.22845476 | 0.224190028 | 0.391295038 |
| 206956_at   | 0.218888474 | 4.218150744 | 8.66E-05    | 0.000652901 |
| 206957_at   | -0.01890376 | -0.65353096 | 0.515971766 | 0.686084458 |
| 206958_s_at | 0.17047698  | 1.992716882 | 0.050959217 | 0.129379613 |
| 206959_s_at | 0.027134238 | 0.611528214 | 0.54321653  | 0.707838158 |
| 206960_at   | 0.170699363 | 4.914489676 | 7.52E-06    | 8.44E-05    |
| 206961_s_at | 0.005100129 | 0.180902331 | 0.857068815 | 0.921938741 |
| 206962_x_at | 0.019651348 | 0.742861712 | 0.460534825 | 0.638994356 |
| 206963_s_at | -0.03092334 | -0.7286905  | 0.469094898 | 0.645894786 |
| 206964_at   | 0.039537238 | 1.117830632 | 0.268203814 | 0.443585407 |
| 206965_at   | 0.154607404 | 5.436266476 | 1.11E-06    | 1.74E-05    |
| 206966_s_at | 0.072758059 | 2.15669437  | 0.035146274 | 0.096572843 |
| 206967_at   | 0.165859105 | 3.235901809 | 0.00199654  | 0.009098538 |
| 206968_s_at | -0.08348758 | -1.71063264 | 0.092441665 | 0.205100769 |
| 206969_at   | 0.074502691 | 1.567055103 | 0.12248951  | 0.253552729 |
| 206970_at   | 0.216813751 | 2.952536902 | 0.00452941  | 0.018197446 |
| 206971_at   | 0.001728388 | 0.047619419 | 0.962181571 | 0.980774327 |
| 206972_s_at | 0.019172831 | 0.43246832  | 0.666989373 | 0.799498825 |
| 206973_at   | -0.08467403 | -1.73467055 | 0.088059656 | 0.197707331 |
| 206974_at   | 0.014029084 | 0.415799682 | 0.679076237 | 0.807784599 |
| 206975_at   | -0.05768    | -1.33162441 | 0.18814335  | 0.34635674  |
| 206976_s_at | -0.57894504 | -4.29426484 | 6.68E-05    | 0.000524529 |
| 206977_at   | 0.012324961 | 0.766767933 | 0.446299413 | 0.626268121 |
| 206978_at   | 0.031941329 | 0.614460887 | 0.541290665 | 0.706584984 |
| 206979_at   | -0.02913681 | -0.62453042 | 0.534704805 | 0.701245    |
| 206980_s_at | 0.086392289 | 2.401449852 | 0.019523546 | 0.060417278 |
| 206981_at   | -0.04427575 | -1.01679984 | 0.313430855 | 0.494505305 |
| 206982_at   | -0.01232691 | -0.43138521 | 0.667772119 | 0.799851832 |
| 206983_at   | -0.01663509 | -0.87306238 | 0.386194716 | 0.568847013 |
| 206984_s_at | -0.99139371 | -7.6601155  | 2.15E-10    | 3.40E-08    |
| 206985_at   | 0.164515754 | 2.829188065 | 0.006380879 | 0.024099911 |
| 206986_at   | 0.009526915 | 0.139708223 | 0.889369876 | 0.940719142 |
| 206987_x_at | 0.023619667 | 0.582315716 | 0.562589201 | 0.723483917 |
| 206988_at   | -0.09380473 | -1.52382937 | 0.132933325 | 0.269570132 |
| 206989_s_at | 0.27898907  | 3.580953509 | 0.000696445 | 0.003778745 |
| 206990_at   | -0.03195221 | -0.5395082  | 0.591581587 | 0.745347436 |
| 206991_s_at | -0.04114445 | -0.85248379 | 0.397418432 | 0.579775569 |
| 206992_s_at | -0.05152829 | -1.25698772 | 0.213748058 | 0.379215919 |
| 206993_at   | 0.038649841 | 1.061979152 | 0.292604767 | 0.471108595 |
| 206994_at   | 0.067334383 | 2.088599959 | 0.041100109 | 0.109284035 |
| 206995_x_at | 0.014323606 | 0.855010847 | 0.396029385 | 0.57869365  |
| 206996_x_at | -0.1748907  | -3.60538464 | 0.000645006 | 0.003547018 |
| 206997_s_at | 0.046242545 | 1.196551018 | 0.236303056 | 0.405500545 |
| 206998_x_at | -0.01168799 | -0.23185203 | 0.817461153 | 0.898006451 |

|             |             |             |             |             |
|-------------|-------------|-------------|-------------|-------------|
| 206999_at   | 0.005573547 | 0.212599489 | 0.832377613 | 0.907332202 |
| 207000_s_at | 0.009539635 | 0.277086477 | 0.782689364 | 0.875774135 |
| 207001_x_at | -0.0074592  | -0.19437895 | 0.846551855 | 0.915673527 |
| 207002_s_at | -0.01550154 | -0.45994869 | 0.647256065 | 0.78604299  |
| 207003_at   | -0.00715445 | -0.10020737 | 0.920521938 | 0.958253247 |
| 207004_at   | 0.014503103 | 0.297277213 | 0.767306764 | 0.866606199 |
| 207005_s_at | -0.06222958 | -1.17314532 | 0.245486793 | 0.416842544 |
| 207006_s_at | -0.21696546 | -4.01230249 | 0.000172939 | 0.001165407 |
| 207007_at   | -0.04244866 | -1.32290587 | 0.191008864 | 0.350002794 |
| 207008_at   | -0.01998424 | -0.63548307 | 0.527588728 | 0.69552507  |
| 207009_at   | -0.01353168 | -0.3760639  | 0.708228242 | 0.82811304  |
| 207010_at   | 0.090774068 | 1.05657106  | 0.295046292 | 0.473935422 |
| 207011_s_at | 0.031934211 | 0.639438072 | 0.525031336 | 0.693483286 |
| 207012_at   | 0.040775461 | 1.056878495 | 0.294907124 | 0.47381059  |
| 207013_s_at | -0.02802012 | -0.51010108 | 0.611897771 | 0.760566669 |
| 207014_at   | -0.32992458 | -2.88141314 | 0.005524894 | 0.021383784 |
| 207015_s_at | -0.03510056 | -0.72388932 | 0.472015384 | 0.648308539 |
| 207016_s_at | -0.02078742 | -0.57710504 | 0.566080368 | 0.726426733 |
| 207017_at   | -0.00321007 | -0.13509346 | 0.893001208 | 0.942785836 |
| 207018_s_at | -0.02731665 | -0.90561002 | 0.368852961 | 0.552124344 |
| 207019_s_at | -0.03701481 | -0.78884855 | 0.433382299 | 0.614197612 |
| 207020_at   | -0.04699215 | -0.97390426 | 0.334109547 | 0.516929443 |
| 207021_at   | 0.055923939 | 1.585925636 | 0.118141291 | 0.246773724 |
| 207022_s_at | -0.13656264 | -3.10671168 | 0.002916121 | 0.012528944 |
| 207023_x_at | -0.07384516 | -1.89600717 | 0.062896035 | 0.152611411 |
| 207024_at   | 0.023336211 | 0.590374388 | 0.557210951 | 0.719307794 |
| 207025_at   | -0.00211236 | -0.04504024 | 0.964228461 | 0.981624109 |
| 207026_s_at | -0.7125587  | -7.36335905 | 6.82E-10    | 7.19E-08    |
| 207027_at   | -0.05234006 | -1.18295061 | 0.241608675 | 0.411947769 |
| 207028_at   | 0.029092222 | 0.949679389 | 0.346177776 | 0.529279778 |
| 207029_at   | 0.032086549 | 1.333769405 | 0.187443368 | 0.345423841 |
| 207030_s_at | 1.257857985 | 6.818939017 | 5.65E-09    | 3.00E-07    |
| 207031_at   | 0.000128805 | 0.004259922 | 0.996615562 | 0.998461463 |
| 207032_s_at | -0.02347131 | -0.56903377 | 0.571509112 | 0.729872417 |
| 207033_at   | 0.030533252 | 0.853057995 | 0.397102544 | 0.579450643 |
| 207034_s_at | 0.126758453 | 3.695682521 | 0.000484595 | 0.002789479 |
| 207035_at   | 0.025517716 | 0.65874788  | 0.512639304 | 0.683396741 |
| 207036_x_at | -0.00786772 | -0.24555081 | 0.806888422 | 0.891352729 |
| 207037_at   | -0.02898982 | -0.78716273 | 0.434360616 | 0.615113024 |
| 207038_at   | 0.024298384 | 0.468393564 | 0.641241818 | 0.782025575 |
| 207039_at   | 0.010291103 | 0.366379129 | 0.715402467 | 0.833163558 |
| 207040_s_at | 0.116274605 | 1.578226279 | 0.119900173 | 0.249340585 |
| 207041_at   | -0.01969204 | -0.83153948 | 0.409046507 | 0.59121977  |
| 207042_at   | -0.02920691 | -0.96332921 | 0.339343151 | 0.522224583 |
| 207043_s_at | 0.141280748 | 3.068117177 | 0.003259927 | 0.013778848 |
| 207044_at   | 0.005655518 | 0.146021913 | 0.884405531 | 0.93823234  |
| 207045_at   | 0.004517837 | 0.172631061 | 0.863536638 | 0.925950555 |
| 207046_at   | -0.00424334 | -0.10711846 | 0.915061105 | 0.954807244 |
| 207047_s_at | -0.0553731  | -1.06941885 | 0.289268853 | 0.46761474  |
| 207048_at   | 0.092041121 | 2.490852385 | 0.01559908  | 0.050238097 |
| 207049_at   | -0.39301308 | -7.53262411 | 3.53E-10    | 4.68E-08    |
| 207050_at   | -0.09918572 | -2.89637638 | 0.005299992 | 0.020681677 |
| 207051_at   | -0.00442966 | -0.08283946 | 0.934261675 | 0.965803653 |
| 207052_at   | -0.08235063 | -1.8254433  | 0.073034287 | 0.171080684 |
| 207053_at   | -0.3119939  | -5.67229944 | 4.58E-07    | 8.43E-06    |
| 207054_at   | -0.30522651 | -5.68014128 | 4.45E-07    | 8.23E-06    |
| 207055_at   | 0.077354511 | 1.265594668 | 0.210670012 | 0.375449833 |
| 207056_s_at | -0.08290571 | -1.21068089 | 0.230880941 | 0.399052504 |
| 207057_at   | -0.09803671 | -1.27796421 | 0.206304156 | 0.369736957 |
| 207058_s_at | -0.13573079 | -3.44662688 | 0.001056674 | 0.005333987 |
| 207059_at   | 0.024457968 | 0.699658982 | 0.486910086 | 0.661387927 |
| 207060_at   | 0.029778223 | 0.866403515 | 0.389804601 | 0.572743769 |
| 207061_at   | 0.013300277 | 0.417919763 | 0.677534121 | 0.80657277  |
| 207062_at   | 0.024205363 | 0.583579284 | 0.561744216 | 0.72295895  |
| 207063_at   | 0.024993716 | 0.618591656 | 0.538583963 | 0.704698729 |
| 207064_s_at | -0.04358932 | -1.01319808 | 0.315133209 | 0.496402559 |
| 207065_at   | -0.05263458 | -0.9955207  | 0.323578538 | 0.505652086 |
| 207066_at   | 0.092515485 | 1.776203647 | 0.080893831 | 0.185239432 |
| 207067_s_at | -0.0066163  | -0.16123975 | 0.872459509 | 0.931240247 |
| 207068_at   | 0.012629798 | 0.472154772 | 0.638570893 | 0.780138055 |
| 207069_s_at | 0.113629144 | 2.255369616 | 0.027861287 | 0.080225284 |
| 207070_at   | 0.245479907 | 2.894516727 | 0.005327474 | 0.020768971 |
| 207071_s_at | 0.113213906 | 2.973189818 | 0.004273216 | 0.017338045 |
| 207072_at   | -0.00163499 | -0.04334365 | 0.965575036 | 0.98245787  |
| 207073_at   | -0.13199932 | -2.55802874 | 0.013135008 | 0.043567595 |



|             |             |             |             |             |
|-------------|-------------|-------------|-------------|-------------|
| 207074_s_at | -0.08476559 | -1.78709083 | 0.07909789  | 0.182002929 |
| 207075_at   | 0.070472199 | 1.856332104 | 0.068438798 | 0.162955075 |
| 207076_s_at | -0.06332367 | -1.16464949 | 0.248883046 | 0.421254316 |
| 207077_at   | 0.014950399 | 0.382359987 | 0.703578424 | 0.825180469 |
| 207078_at   | 0.060846207 | 1.63789051  | 0.10680681  | 0.228677299 |
| 207079_s_at | -0.15608766 | -2.78901282 | 0.007120924 | 0.026423806 |
| 207080_s_at | 0.017216733 | 0.626408973 | 0.533480764 | 0.700317883 |
| 207081_s_at | -0.77863151 | -6.53741712 | 1.68E-08    | 6.52E-07    |
| 207082_at   | 0.06578046  | 1.52652921  | 0.132260939 | 0.26860883  |
| 207083_s_at | -0.03657624 | -0.73407261 | 0.465833261 | 0.64341726  |
| 207084_at   | 0.544279338 | 5.08019792  | 4.12E-06    | 5.14E-05    |
| 207085_x_at | 0.015160027 | 0.39979479  | 0.690762061 | 0.816059689 |
| 207086_x_at | -0.05626866 | -0.56828516 | 0.572013912 | 0.730348292 |
| 207087_x_at | -0.03504404 | -0.77963656 | 0.438744133 | 0.619158544 |
| 207088_s_at | -0.18628237 | -3.69785185 | 0.000481256 | 0.002773115 |
| 207089_at   | -0.08004105 | -1.93122821 | 0.058299123 | 0.143694366 |
| 207090_x_at | 0.067212221 | 2.634996706 | 0.010749465 | 0.036958124 |
| 207091_at   | 0.455664276 | 3.908099606 | 0.000243869 | 0.001561323 |
| 207092_at   | 0.026012967 | 0.82567745  | 0.412337896 | 0.594592496 |
| 207093_s_at | -0.25376118 | -3.02014031 | 0.003740127 | 0.015494414 |
| 207094_at   | 0.033250825 | 0.841782043 | 0.403334192 | 0.585671964 |
| 207095_at   | -0.02623441 | -0.75801397 | 0.451482083 | 0.630846873 |
| 207096_at   | 0.02198842  | 0.614526866 | 0.541247377 | 0.706580891 |
| 207097_s_at | 0.01705777  | 0.553699805 | 0.581892184 | 0.737882348 |
| 207098_s_at | 0.15798453  | 2.309823719 | 0.024441898 | 0.072432684 |
| 207099_s_at | -0.09985769 | -2.22041172 | 0.030273374 | 0.085718299 |
| 207100_s_at | 0.045332211 | 0.886230753 | 0.379117797 | 0.561788216 |
| 207101_at   | -0.04889696 | -1.35304737 | 0.181240622 | 0.337683156 |
| 207102_at   | -0.00431873 | -0.21153769 | 0.833202131 | 0.907684292 |
| 207103_at   | -0.74717205 | -7.44166352 | 5.03E-10    | 5.83E-08    |
| 207104_x_at | 0.025951913 | 0.602430983 | 0.549212799 | 0.712390608 |
| 207105_s_at | -0.21087535 | -3.84345427 | 0.000301157 | 0.001869609 |
| 207106_s_at | -0.12222865 | -2.11502109 | 0.038693135 | 0.104079059 |
| 207107_at   | 0.071022902 | 1.806225216 | 0.076022125 | 0.17640845  |
| 207108_s_at | 0.073934169 | 2.781031531 | 0.007277043 | 0.02688926  |
| 207109_at   | -0.00628341 | -0.30544616 | 0.761109369 | 0.862500581 |
| 207110_at   | -0.09282486 | -2.47764394 | 0.016130068 | 0.051650426 |
| 207111_at   | 0.00301645  | 0.074441131 | 0.940913063 | 0.96917586  |
| 207112_s_at | 0.071472362 | 1.36494717  | 0.177490579 | 0.332665506 |
| 207113_s_at | -0.02310366 | -0.54157864 | 0.590163247 | 0.744285917 |
| 207114_at   | 0.0321237   | 0.763583542 | 0.448180659 | 0.627666395 |
| 207115_x_at | 0.149213916 | 5.023220995 | 5.07E-06    | 6.10E-05    |
| 207116_s_at | -0.00913231 | -0.23238336 | 0.817050427 | 0.897873508 |
| 207117_at   | -0.02535398 | -0.45413689 | 0.651408903 | 0.788683895 |
| 207118_s_at | -0.02051985 | -0.61721032 | 0.539488315 | 0.705208721 |
| 207119_at   | 0.022705603 | 0.953849375 | 0.344080336 | 0.526920174 |
| 207120_at   | -0.21375909 | -4.77895226 | 1.22E-05    | 0.00012611  |
| 207121_s_at | -0.28915551 | -4.34780902 | 5.56E-05    | 0.000450879 |
| 207122_x_at | 0.008526213 | 0.237951449 | 0.812749284 | 0.894899535 |
| 207123_s_at | 0.002644933 | 0.058039016 | 0.953915125 | 0.976284116 |
| 207124_s_at | -0.79760217 | -6.83090085 | 5.40E-09    | 2.92E-07    |
| 207125_at   | 0.042881444 | 1.862311869 | 0.067577915 | 0.161429909 |
| 207126_x_at | 0.027984634 | 0.688850122 | 0.493637544 | 0.667237043 |
| 207127_s_at | 0.251187244 | 3.410411217 | 0.00118063  | 0.005854292 |
| 207128_s_at | -0.16659132 | -4.35858462 | 5.36E-05    | 0.000436913 |
| 207129_at   | -0.02041188 | -0.45590482 | 0.650144439 | 0.788051728 |
| 207130_at   | 0.030947579 | 0.975963547 | 0.333096648 | 0.515790845 |
| 207131_x_at | 0.04261966  | 0.824764902 | 0.412851714 | 0.595160596 |
| 207132_x_at | 0.000817588 | 0.017282577 | 0.986269928 | 0.993382665 |
| 207133_x_at | 0.248352706 | 4.934631965 | 7.00E-06    | 7.98E-05    |
| 207134_x_at | 0.040723149 | 1.024335261 | 0.309889397 | 0.490528333 |
| 207135_at   | -0.13337468 | -1.93469236 | 0.057862858 | 0.142921854 |
| 207136_at   | 0.011668131 | 0.380657613 | 0.704834558 | 0.826090057 |
| 207137_at   | 0.041838138 | 0.890402871 | 0.376892806 | 0.559604428 |
| 207138_at   | -0.00753918 | -0.22921764 | 0.819498359 | 0.899413586 |
| 207139_at   | -0.00421415 | -0.09805718 | 0.922221722 | 0.95931322  |
| 207140_at   | 0.007557888 | 0.147180692 | 0.883494903 | 0.937733731 |
| 207141_s_at | 0.091996204 | 1.465804242 | 0.148050259 | 0.291516048 |
| 207142_at   | 0.030300187 | 1.512445847 | 0.135798246 | 0.273798832 |
| 207143_at   | -0.04109131 | -0.86349653 | 0.391387106 | 0.57416499  |
| 207144_s_at | -0.06287412 | -1.01892865 | 0.31242761  | 0.493357881 |
| 207145_at   | -0.00015451 | -0.01091298 | 0.991329965 | 0.99594751  |
| 207146_at   | 0.016497265 | 0.46634896  | 0.642695745 | 0.78292457  |
| 207147_at   | 0.07672038  | 1.999864471 | 0.050159834 | 0.127771064 |
| 207148_x_at | 0.017256053 | 0.540999802 | 0.590559616 | 0.744594126 |

|             |             |             |             |             |
|-------------|-------------|-------------|-------------|-------------|
| 207149_at   | -0.46744758 | -5.63381954 | 5.29E-07    | 9.50E-06    |
| 207150_at   | -0.06026545 | -1.36219674 | 0.178352027 | 0.333900161 |
| 207151_at   | 0.047610764 | 1.108549581 | 0.272156182 | 0.44808267  |
| 207152_at   | -0.1740634  | -4.5650262  | 2.61E-05    | 0.000239336 |
| 207153_s_at | -0.27673843 | -6.2642202  | 4.81E-08    | 1.42E-06    |
| 207154_at   | -0.01856116 | -0.43364078 | 0.666142469 | 0.798949071 |
| 207155_at   | -0.01370225 | -0.35301565 | 0.725344144 | 0.83951625  |
| 207156_at   | 0.026116618 | 1.632553208 | 0.107928669 | 0.230648308 |
| 207157_s_at | 0.016241215 | 0.277366859 | 0.782475138 | 0.875682456 |
| 207158_at   | -0.01771789 | -0.49622131 | 0.621595554 | 0.767603783 |
| 207159_x_at | -0.13115125 | -3.42623564 | 0.001124861 | 0.005617015 |
| 207160_at   | 0.025139755 | 0.673974804 | 0.502978834 | 0.675150324 |
| 207161_at   | -0.03122574 | -1.25345083 | 0.215022537 | 0.380811858 |
| 207162_s_at | -0.17506257 | -3.90827363 | 0.00024373  | 0.001560792 |
| 207163_s_at | -0.04649706 | -1.22671952 | 0.224836924 | 0.392071942 |
| 207164_s_at | -0.28106008 | -4.21642213 | 8.71E-05    | 0.000656081 |
| 207165_at   | 0.030202596 | 1.09986686  | 0.27589061  | 0.452367077 |
| 207166_at   | 0.005392899 | 0.315825584 | 0.753257666 | 0.858024509 |
| 207167_at   | -0.01868952 | -0.48990298 | 0.626032734 | 0.770927158 |
| 207168_s_at | -0.09274468 | -1.90918277 | 0.06114162  | 0.149242001 |
| 207169_x_at | 0.53783552  | 5.997841956 | 1.33E-07    | 3.16E-06    |
| 207170_s_at | -0.30925638 | -5.47309242 | 9.66E-07    | 1.55E-05    |
| 207172_s_at | -0.13388072 | -2.72601729 | 0.008441754 | 0.030415902 |
| 207173_x_at | -0.23619803 | -2.52692701 | 0.014228297 | 0.046479866 |
| 207174_at   | -0.39527385 | -3.75143458 | 0.000405432 | 0.002399943 |
| 207175_at   | 0.007688512 | 0.264917153 | 0.792003453 | 0.881513272 |
| 207176_s_at | -0.00952758 | -0.19711341 | 0.844421272 | 0.914438466 |
| 207177_at   | 0.036183314 | 1.77559836  | 0.080994668 | 0.185422277 |
| 207178_s_at | 0.018580022 | 1.113192362 | 0.270173954 | 0.445841756 |
| 207179_at   | -0.00209397 | -0.04339658 | 0.965533022 | 0.982437489 |
| 207180_s_at | 0.017733681 | 0.3543723   | 0.724332673 | 0.838888694 |
| 207181_s_at | 0.231666271 | 3.326434814 | 0.00152314  | 0.007252521 |
| 207182_at   | -0.05392586 | -1.48487698 | 0.142939267 | 0.284225027 |
| 207183_at   | -0.1044553  | -2.44783938 | 0.017388551 | 0.054990739 |
| 207184_at   | 0.024313573 | 0.496014951 | 0.621740253 | 0.767626418 |
| 207185_at   | 0.030806187 | 0.446117447 | 0.657157453 | 0.792554198 |
| 207186_s_at | 0.308748658 | 4.882571074 | 8.44E-06    | 9.27E-05    |
| 207187_at   | 0.010043048 | 0.227584228 | 0.820762119 | 0.90042468  |
| 207188_at   | 0.026106757 | 0.629478047 | 0.531484126 | 0.698568842 |
| 207189_s_at | 0.030664743 | 0.983084324 | 0.329609843 | 0.51205152  |
| 207190_at   | -0.0100211  | -0.28586186 | 0.775992599 | 0.871767665 |
| 207191_s_at | 0.136082395 | 3.213106669 | 0.002135919 | 0.009630118 |
| 207192_at   | -0.02854    | -0.54415283 | 0.588402075 | 0.743060988 |
| 207193_at   | 0.04229198  | 1.310858932 | 0.195022368 | 0.355259627 |
| 207194_s_at | 0.092533129 | 2.778589868 | 0.007325429 | 0.027030058 |
| 207195_at   | 0.017198635 | 0.624681747 | 0.534606149 | 0.701201298 |
| 207196_s_at | 0.287016343 | 5.660080916 | 4.79E-07    | 8.76E-06    |
| 207197_at   | -0.04778405 | -0.93729997 | 0.35245354  | 0.535668013 |
| 207198_s_at | 0.061826317 | 1.348704478 | 0.182624146 | 0.339538994 |
| 207199_at   | -0.05619358 | -1.42380934 | 0.159807802 | 0.308129354 |
| 207200_at   | -0.06985597 | -1.22276841 | 0.226314993 | 0.393850305 |
| 207201_s_at | -0.03251244 | -0.94146785 | 0.350332426 | 0.533465391 |
| 207202_s_at | 0.001163454 | 0.036476521 | 0.971026447 | 0.985267245 |
| 207203_s_at | -0.04230753 | -0.89552609 | 0.37417192  | 0.557267777 |
| 207204_at   | 0.029827379 | 1.154323611 | 0.253056073 | 0.426021095 |
| 207205_at   | -0.02480221 | -0.79642062 | 0.429004226 | 0.610043491 |
| 207206_s_at | -0.03190101 | -0.93734276 | 0.35243172  | 0.535653067 |
| 207207_at   | -0.01343161 | -0.32906497 | 0.743280457 | 0.851197689 |
| 207208_at   | 0.02668357  | 0.985565167 | 0.328400774 | 0.51094473  |
| 207209_at   | 0.001752289 | 0.052108472 | 0.958619591 | 0.978902041 |
| 207210_at   | -0.05089668 | -0.7967799  | 0.428797151 | 0.609904276 |
| 207211_at   | 0.031978811 | 0.811333743 | 0.420459173 | 0.602473914 |
| 207212_at   | -0.03403362 | -0.74673473 | 0.458211024 | 0.636824551 |
| 207213_s_at | -0.25969264 | -5.07310771 | 4.23E-06    | 5.25E-05    |
| 207214_at   | 0.032846587 | 0.738128021 | 0.463384185 | 0.641302016 |
| 207215_at   | -0.00209723 | -0.05518251 | 0.95618088  | 0.977484008 |
| 207216_at   | -0.03629659 | -0.93469472 | 0.353783624 | 0.536887868 |
| 207217_s_at | -0.0037373  | -0.08461465 | 0.93285633  | 0.965141447 |
| 207218_at   | -0.04997912 | -1.49620162 | 0.139970906 | 0.280016998 |
| 207219_at   | -0.12120591 | -2.75514487 | 0.007805333 | 0.028499667 |
| 207220_at   | -0.07985104 | -1.56888988 | 0.122061182 | 0.252799403 |
| 207221_at   | 0.046135925 | 1.24461404  | 0.218231311 | 0.384741371 |
| 207222_at   | -0.00328428 | -0.08615026 | 0.931640827 | 0.964486723 |
| 207223_s_at | -0.06560043 | -1.95436668 | 0.055437591 | 0.138344787 |
| 207224_s_at | -0.0213107  | -0.61019686 | 0.544091977 | 0.70854508  |

|             |             |             |             |             |
|-------------|-------------|-------------|-------------|-------------|
| 207225_at   | -0.00752674 | -0.28361658 | 0.77770444  | 0.87253651  |
| 207226_at   | -0.04087069 | -0.93525093 | 0.353499385 | 0.536652919 |
| 207227_x_at | -0.22621633 | -4.74062963 | 1.40E-05    | 0.000141589 |
| 207228_at   | -0.0361902  | -0.95028595 | 0.345872167 | 0.529011597 |
| 207229_at   | -0.02124373 | -0.97981095 | 0.33120968  | 0.513741124 |
| 207230_at   | 0.06872558  | 2.063218359 | 0.04353386  | 0.114434495 |
| 207231_at   | -0.03946307 | -0.81919298 | 0.41599747  | 0.598305944 |
| 207232_s_at | -0.12211547 | -3.32738768 | 0.001518774 | 0.007236373 |
| 207233_s_at | 0.096363353 | 1.915283259 | 0.060343487 | 0.147733284 |
| 207234_at   | 0.037312474 | 1.495701123 | 0.140101059 | 0.280193534 |
| 207235_s_at | -0.26765871 | -5.36282912 | 1.46E-06    | 2.18E-05    |
| 207236_at   | 0.067685259 | 2.494379583 | 0.015459978 | 0.049878844 |
| 207237_at   | -0.04010342 | -0.98130142 | 0.330480588 | 0.512988924 |
| 207238_s_at | 0.053265198 | 0.808496319 | 0.422077042 | 0.604067249 |
| 207239_s_at | -0.26955308 | -5.91409237 | 1.83E-07    | 4.04E-06    |
| 207240_s_at | -0.01251642 | -0.58950993 | 0.557786647 | 0.719673366 |
| 207241_at   | 0.015016319 | 0.416699221 | 0.678421757 | 0.807306898 |
| 207242_s_at | -0.07374144 | -2.13085898 | 0.037309972 | 0.1011868   |
| 207243_s_at | -0.15366913 | -3.32738693 | 0.001518777 | 0.007236373 |
| 207244_x_at | 0.021259582 | 0.440170727 | 0.661433723 | 0.795586068 |
| 207245_at   | -0.01174498 | -0.32900411 | 0.743326224 | 0.851197689 |
| 207246_at   | 0.056408327 | 1.965911781 | 0.054055276 | 0.135629822 |
| 207247_s_at | 0.017024937 | 0.997121764 | 0.322807457 | 0.504772782 |
| 207248_at   | -0.39779367 | -6.95292826 | 3.36E-09    | 2.09E-07    |
| 207249_s_at | 0.065991612 | 2.081958888 | 0.0417252   | 0.110551496 |
| 207250_at   | 0.023379722 | 0.690179525 | 0.492807377 | 0.666501658 |
| 207251_at   | -0.0822249  | -1.32822964 | 0.189255212 | 0.347816183 |
| 207252_at   | 0.004563459 | 0.116184536 | 0.907903772 | 0.951197533 |
| 207253_s_at | 0.042440694 | 1.340415234 | 0.185287139 | 0.342878258 |
| 207254_at   | 0.044289328 | 1.234254656 | 0.222037741 | 0.389027392 |
| 207255_at   | 0.016713933 | 0.403680915 | 0.687917552 | 0.813974411 |
| 207256_at   | -0.00531469 | -0.20422846 | 0.838883021 | 0.911045878 |
| 207257_at   | 0.067744884 | 1.85034812  | 0.069309527 | 0.164519937 |
| 207258_at   | -0.01082098 | -0.22889839 | 0.819745318 | 0.899574173 |
| 207259_at   | -0.01044616 | -0.34813145 | 0.72898971  | 0.84188243  |
| 207260_at   | -0.11302716 | -2.13505609 | 0.036950743 | 0.10045639  |
| 207261_at   | -0.01292663 | -0.28810956 | 0.774280032 | 0.870830149 |
| 207262_at   | 0.022660995 | 1.353413614 | 0.181124314 | 0.337522738 |
| 207263_x_at | -0.00157601 | -0.06139808 | 0.951251231 | 0.975105834 |
| 207264_at   | -0.01647508 | -0.79609511 | 0.429191885 | 0.610290923 |
| 207265_s_at | 0.054628363 | 1.552033567 | 0.126041748 | 0.259302948 |
| 207266_x_at | -0.34992459 | -7.5972463  | 2.75E-10    | 4.01E-08    |
| 207267_s_at | -0.05151056 | -1.95888526 | 0.054893016 | 0.137261717 |
| 207268_x_at | -0.24250144 | -5.38184518 | 1.36E-06    | 2.05E-05    |
| 207269_at   | -0.01151965 | -0.30532949 | 0.761197777 | 0.862500581 |
| 207270_x_at | 0.051839558 | 1.960167057 | 0.05473937  | 0.136990577 |
| 207271_x_at | -0.02258719 | -0.46348059 | 0.644737823 | 0.784284779 |
| 207272_at   | -0.00857444 | -0.48698686 | 0.628085352 | 0.772525305 |
| 207273_at   | -0.00330033 | -0.17243321 | 0.863691465 | 0.926061584 |
| 207274_at   | -0.03106367 | -0.67246252 | 0.503933845 | 0.675985575 |
| 207275_s_at | 0.121662607 | 1.458730568 | 0.149981831 | 0.294197155 |
| 207276_at   | -1.80896549 | -8.17344108 | 2.93E-11    | 1.08E-08    |
| 207277_at   | 0.010119464 | 0.216583194 | 0.829285845 | 0.905286834 |
| 207278_s_at | -0.03741567 | -0.72344908 | 0.472283691 | 0.648557466 |
| 207279_s_at | 0.214810925 | 3.511386509 | 0.000865199 | 0.004516698 |
| 207280_at   | 0.011574228 | 0.316252368 | 0.752935371 | 0.857832299 |
| 207281_x_at | -0.03407601 | -0.68901664 | 0.493533515 | 0.667180878 |
| 207282_s_at | -0.09377075 | -1.61380451 | 0.111945539 | 0.236986615 |
| 207283_at   | 0.169753407 | 4.049334147 | 0.000152897 | 0.001049978 |
| 207284_s_at | 0.02591723  | 0.700238832 | 0.486550628 | 0.661100591 |
| 207285_x_at | -0.00762567 | -0.1736458  | 0.862742634 | 0.925362768 |
| 207286_at   | 0.010327128 | 0.621194271 | 0.536882173 | 0.703068995 |
| 207287_at   | 0.023370029 | 0.589129747 | 0.558039928 | 0.719829147 |
| 207288_at   | 0.052660469 | 1.488151502 | 0.142075915 | 0.28300916  |
| 207289_at   | -0.09602453 | -1.8244448  | 0.073187062 | 0.171380082 |
| 207290_at   | -0.06682977 | -1.47193194 | 0.146392806 | 0.289060142 |
| 207291_at   | 0.015753411 | 0.390495473 | 0.697586983 | 0.821007228 |
| 207292_s_at | -0.03880927 | -1.18441909 | 0.241031705 | 0.411215031 |
| 207293_s_at | -0.04824248 | -1.37135447 | 0.175496114 | 0.330014113 |
| 207294_at   | 0.022892434 | 1.037350329 | 0.303836711 | 0.483654021 |
| 207295_at   | -0.01914461 | -0.47990283 | 0.633083974 | 0.776171755 |
| 207296_at   | 0.005302461 | 0.160599651 | 0.872961405 | 0.93157385  |
| 207298_at   | -0.00410333 | -0.09725866 | 0.922853066 | 0.95963492  |
| 207299_s_at | -0.38334617 | -5.93494253 | 1.69E-07    | 3.81E-06    |
| 207300_s_at | -0.00794227 | -0.11566727 | 0.908311934 | 0.951487835 |

|             |              |             |             |             |
|-------------|--------------|-------------|-------------|-------------|
| 207301_at   | -0.00214743  | -0.0489172  | 0.961151727 | 0.980188777 |
| 207302_at   | -0.06098975  | -1.52231255 | 0.133312273 | 0.270166967 |
| 207303_at   | 0.107027939  | 1.890159476 | 0.063688266 | 0.154132018 |
| 207304_at   | -0.01724234  | -0.78825132 | 0.433728731 | 0.61454006  |
| 207305_s_at | 0.048015107  | 1.156206331 | 0.252291499 | 0.425246528 |
| 207306_at   | -0.13391162  | -1.51460502 | 0.135251113 | 0.273031426 |
| 207307_at   | -1.30763313  | -6.15853404 | 7.22E-08    | 1.96E-06    |
| 207308_at   | 0.040480579  | 0.417560883 | 0.677795067 | 0.806754478 |
| 207309_at   | -0.09027479  | -1.86651221 | 0.066978688 | 0.160281191 |
| 207310_s_at | -0.02009469  | -0.45369553 | 0.651724734 | 0.788899918 |
| 207311_at   | -0.10309089  | -2.4263731  | 0.018348945 | 0.057450682 |
| 207312_at   | 0.250527885  | 4.985222613 | 5.83E-06    | 6.82E-05    |
| 207313_x_at | 0.017960645  | 0.504509881 | 0.615796083 | 0.763681557 |
| 207314_x_at | -0.06810646  | -1.12266384 | 0.266161667 | 0.441367564 |
| 207315_at   | -0.02062138  | -0.56676704 | 0.573038272 | 0.731135847 |
| 207316_at   | -0.16269112  | -3.34270696 | 0.001450182 | 0.006968984 |
| 207317_s_at | 0.025051604  | 0.425890465 | 0.671748786 | 0.80235713  |
| 207318_s_at | 0.238936913  | 4.660937022 | 1.86E-05    | 0.000179852 |
| 207319_s_at | -0.01822268  | -0.46627794 | 0.642746271 | 0.78292457  |
| 207320_x_at | 0.016557242  | 0.302314234 | 0.763483582 | 0.863948459 |
| 207321_s_at | -0.10008579  | -2.94381191 | 0.004641871 | 0.018557517 |
| 207322_at   | -0.04401795  | -1.34214943 | 0.184727591 | 0.342111947 |
| 207323_s_at | 0.269232966  | 2.56227361  | 0.012991852 | 0.043172865 |
| 207324_s_at | 0.009203561  | 0.360010204 | 0.72013454  | 0.836150084 |
| 207325_x_at | 0.04629446   | 1.957576225 | 0.055050306 | 0.137554976 |
| 207326_at   | 0.042553166  | 2.430490022 | 0.018161144 | 0.056994443 |
| 207327_at   | 0.08408933   | 1.838043448 | 0.071129324 | 0.167681809 |
| 207328_at   | -0.0403489   | -0.86213898 | 0.3921275   | 0.574909366 |
| 207329_at   | 0.027748068  | 0.785261228 | 0.435465663 | 0.616056199 |
| 207330_at   | 0.379038505  | 3.582208538 | 0.00069371  | 0.00376848  |
| 207331_at   | 0.012081238  | 0.74848359  | 0.457163929 | 0.636041786 |
| 207332_s_at | -0.019895796 | 0.240496639 | 0.81078514  | 0.893823618 |
| 207333_at   | -0.02194034  | -0.53513523 | 0.594582506 | 0.74763192  |
| 207334_s_at | 0.024095861  | 0.653241685 | 0.516156889 | 0.686123045 |
| 207335_x_at | 0.096066537  | 1.85464387  | 0.068683514 | 0.163367919 |
| 207336_at   | 0.427427864  | 5.554720067 | 7.12E-07    | 1.21E-05    |
| 207337_at   | -0.0171818   | -0.35312008 | 0.72526627  | 0.839453337 |
| 207338_s_at | -0.05076342  | -1.72553091 | 0.0897051   | 0.20048509  |
| 207339_s_at | 0.001696073  | 0.030367762 | 0.975877007 | 0.987924325 |
| 207341_at   | -0.03550254  | -0.89906814 | 0.372298075 | 0.555496916 |
| 207342_at   | -0.04585941  | -1.7798996  | 0.080280378 | 0.184249508 |
| 207343_at   | 0.036490401  | 1.130619605 | 0.262824121 | 0.437463469 |
| 207344_at   | 0.074637387  | 1.462677486 | 0.148901649 | 0.292736425 |
| 207345_at   | -0.02063727  | -0.57083716 | 0.570293949 | 0.72882037  |
| 207346_at   | 0.090902423  | 3.001489557 | 0.003944007 | 0.016209819 |
| 207347_at   | 0.065150981  | 1.835691434 | 0.07148171  | 0.168326075 |
| 207348_s_at | -0.04347113  | -1.10311767 | 0.274488264 | 0.450799715 |
| 207349_s_at | -0.01172914  | -0.3403385  | 0.734819361 | 0.84562125  |
| 207350_s_at | -0.07474681  | -2.55852174 | 0.013118309 | 0.043525127 |
| 207351_s_at | 0.023041236  | 0.535028636 | 0.594655747 | 0.747702978 |
| 207352_s_at | -0.05125532  | -1.41595052 | 0.162086464 | 0.311220496 |
| 207353_s_at | -0.10028588  | -1.60978142 | 0.112823052 | 0.238358709 |
| 207354_at   | 0.015276392  | 0.261918981 | 0.794302918 | 0.882950895 |
| 207355_at   | 0.028251965  | 0.637618156 | 0.526207325 | 0.694536625 |
| 207356_at   | -0.00484056  | -0.11954901 | 0.90524956  | 0.949828589 |
| 207357_s_at | 0.065452154  | 1.622344797 | 0.110101042 | 0.23410418  |
| 207358_x_at | 0.38023873   | 4.86320527  | 9.05E-06    | 9.83E-05    |
| 207359_at   | -0.09009238  | -2.16546007 | 0.034437528 | 0.095057872 |
| 207360_s_at | -0.01028467  | -0.24911599 | 0.804142658 | 0.889671684 |
| 207361_at   | 0.036399211  | 1.324059802 | 0.19062772  | 0.34949067  |
| 207362_at   | -0.09451867  | -2.27611018 | 0.026511937 | 0.07722051  |
| 207363_at   | -0.05418776  | -2.20480744 | 0.031408226 | 0.088321678 |
| 207364_at   | 0.027622368  | 0.605425159 | 0.547235551 | 0.710774834 |
| 207365_x_at | 0.320552529  | 5.655101929 | 4.89E-07    | 8.88E-06    |
| 207366_at   | -0.008966874 | -1.8294515  | 0.072423713 | 0.169997567 |
| 207367_at   | 0.008205441  | 0.226814287 | 0.821357985 | 0.900680416 |
| 207368_at   | -0.16216133  | -3.19332163 | 0.002264261 | 0.01011741  |
| 207369_at   | -0.00210954  | -0.06095617 | 0.951601658 | 0.975166956 |
| 207370_at   | -0.03865077  | -0.74683805 | 0.458149128 | 0.636758329 |
| 207371_at   | 0.002101082  | 0.095698848 | 0.92408646  | 0.960269533 |
| 207372_s_at | 0.044732212  | 1.0839891   | 0.282812016 | 0.460177822 |
| 207373_at   | -0.02368409  | -0.50904665 | 0.612632085 | 0.761107447 |
| 207374_at   | 0.02412762   | 0.710171666 | 0.480416003 | 0.655663169 |
| 207375_s_at | 0.105832361  | 2.675654094 | 0.009655469 | 0.033927369 |
| 207376_at   | -0.0091006   | -0.20966719 | 0.834655086 | 0.908851447 |

|             |             |             |             |             |
|-------------|-------------|-------------|-------------|-------------|
| 207377_at   | -0.04512715 | -0.83748575 | 0.405724262 | 0.58801533  |
| 207378_at   | -0.03365493 | -1.0471882  | 0.299315392 | 0.478604777 |
| 207379_at   | -0.0608678  | -0.70412565 | 0.484144925 | 0.659054095 |
| 207380_x_at | 0.052037443 | 1.039898487 | 0.302661178 | 0.482315328 |
| 207381_at   | -0.06759271 | -1.63059758 | 0.108342115 | 0.23133275  |
| 207382_at   | 0.059537987 | 1.457140177 | 0.150418814 | 0.294860197 |
| 207383_s_at | -0.01849903 | -0.55220416 | 0.58290975  | 0.73868523  |
| 207384_at   | 0.068109935 | 1.876592592 | 0.065558886 | 0.157677201 |
| 207385_at   | 0.108717559 | 2.582767173 | 0.012320433 | 0.041344406 |
| 207386_at   | 0.000590038 | 0.020026603 | 0.984090224 | 0.992238247 |
| 207387_s_at | -0.00999463 | -0.36029889 | 0.719919812 | 0.835957991 |
| 207388_s_at | 0.021720147 | 0.517864179 | 0.606503825 | 0.756344353 |
| 207389_at   | 0.045002635 | 1.28858327  | 0.202610204 | 0.365176572 |
| 207390_s_at | 0.184737472 | 2.789513604 | 0.007111231 | 0.026392223 |
| 207391_s_at | -0.01030454 | -0.23819565 | 0.81256078  | 0.894823342 |
| 207392_x_at | 0.023339464 | 0.621021118 | 0.536995307 | 0.703134721 |
| 207393_at   | -0.03775283 | -0.73938531 | 0.462626404 | 0.640557999 |
| 207394_at   | 0.120678417 | 2.829195043 | 0.006380757 | 0.024099911 |
| 207395_at   | 0.03964074  | 0.672761778 | 0.503744785 | 0.675847291 |
| 207396_s_at | -0.07834191 | -2.44494486 | 0.017515358 | 0.05531739  |
| 207397_s_at | 0.013882549 | 0.670629693 | 0.505092594 | 0.676869511 |
| 207398_at   | -0.03373254 | -0.94196861 | 0.350078141 | 0.53319735  |
| 207399_at   | -0.02917431 | -0.91699402 | 0.362906547 | 0.546027653 |
| 207400_at   | -0.30387917 | -5.66605503 | 4.69E-07    | 8.60E-06    |
| 207401_at   | 0.054182739 | 1.088552465 | 0.280810511 | 0.457945023 |
| 207402_at   | -0.08993169 | -2.23145536 | 0.029492192 | 0.083953189 |
| 207403_at   | 0.054258792 | 1.710100726 | 0.092540627 | 0.205211159 |
| 207404_s_at | -0.22279071 | -4.34162095 | 5.68E-05    | 0.00045875  |
| 207405_s_at | -0.01550547 | -0.41514432 | 0.679553216 | 0.808127799 |
| 207406_at   | -0.00336458 | -0.18705332 | 0.852265317 | 0.919013694 |
| 207407_x_at | -0.00969861 | -0.33503084 | 0.738798871 | 0.848518468 |
| 207408_at   | 0.042585046 | 0.855601794 | 0.395704993 | 0.578352003 |
| 207409_at   | 0.027146121 | 0.741048888 | 0.461624832 | 0.639818173 |
| 207410_s_at | -0.03843464 | -1.41624433 | 0.162000826 | 0.311122896 |
| 207412_x_at | 0.008274376 | 0.148387039 | 0.882547061 | 0.937150572 |
| 207413_s_at | -0.01931316 | -0.46832821 | 0.641288269 | 0.782025575 |
| 207414_s_at | 0.01210378  | 0.102638239 | 0.918600723 | 0.957036461 |
| 207415_at   | 0.034496742 | 1.170672705 | 0.246471775 | 0.418054445 |
| 207416_s_at | 0.022733112 | 0.478789451 | 0.63387117  | 0.776710727 |
| 207417_s_at | 0.260856959 | 3.670314124 | 0.000525325 | 0.002987    |
| 207418_s_at | -0.16847422 | -4.02429141 | 0.000166188 | 0.001126538 |
| 207419_s_at | 0.033788078 | 1.230731746 | 0.223343243 | 0.390494509 |
| 207420_at   | 0.003763097 | 0.095419074 | 0.924307707 | 0.960365463 |
| 207421_at   | -0.05269524 | -1.17672294 | 0.244066641 | 0.415059804 |
| 207422_at   | 0.012886829 | 0.349469685 | 0.727990221 | 0.841255804 |
| 207423_s_at | 0.01077859  | 0.309304857 | 0.758187392 | 0.860971049 |
| 207424_at   | -0.05770024 | -1.42399365 | 0.159754661 | 0.308053472 |
| 207425_s_at | 0.15041178  | 2.712677484 | 0.008748824 | 0.031285201 |
| 207426_s_at | 0.071516106 | 1.780547874 | 0.080173179 | 0.184031829 |
| 207427_at   | -0.05222324 | -1.05550248 | 0.295530364 | 0.474521917 |
| 207428_x_at | 0.116928136 | 3.094906328 | 0.003017505 | 0.012910047 |
| 207429_at   | 0.050697456 | 0.971254897 | 0.335415682 | 0.518250567 |
| 207430_s_at | -0.02458667 | -1.33883916 | 0.185796784 | 0.343480037 |
| 207431_s_at | -0.26170713 | -3.31920508 | 0.001556655 | 0.007390061 |
| 207432_at   | -0.09749415 | -1.94232324 | 0.056911661 | 0.141187675 |
| 207433_at   | -0.01000293 | -0.39238551 | 0.696197796 | 0.820161633 |
| 207434_s_at | -0.01824192 | -0.30403751 | 0.762176941 | 0.863127128 |
| 207435_s_at | 0.2149264   | 5.889981777 | 2.01E-07    | 4.36E-06    |
| 207436_x_at | 0.262447719 | 4.951461091 | 6.58E-06    | 7.57E-05    |
| 207437_at   | -0.01855663 | -0.66310853 | 0.509862661 | 0.680791791 |
| 207438_s_at | 0.072260894 | 1.638655297 | 0.106646837 | 0.228422334 |
| 207439_s_at | -0.00976045 | -0.28610416 | 0.775807929 | 0.871671946 |
| 207440_at   | 0.089227498 | 2.781517229 | 0.007267453 | 0.026860299 |
| 207441_at   | -0.05627183 | -1.62526294 | 0.109476468 | 0.23309946  |
| 207442_at   | 0.006842019 | 0.146788905 | 0.883802772 | 0.937927261 |
| 207443_at   | 0.139336655 | 1.557213948 | 0.124807524 | 0.257212529 |
| 207444_at   | -0.04823695 | -0.8267325  | 0.411744325 | 0.594024061 |
| 207445_s_at | 0.07408817  | 2.432491564 | 0.018070466 | 0.056761685 |
| 207446_at   | 0.029474323 | 0.786860267 | 0.434536278 | 0.615231857 |
| 207447_s_at | 0.145310083 | 3.061096457 | 0.003326405 | 0.014019585 |
| 207448_at   | -0.04028562 | -1.09913497 | 0.276207027 | 0.452622714 |
| 207449_s_at | -0.05406351 | -1.62711998 | 0.109080499 | 0.232454018 |
| 207450_s_at | -0.01163323 | -0.24249933 | 0.809240501 | 0.892896202 |
| 207451_at   | 0.00595848  | 0.147128401 | 0.883535993 | 0.937751658 |
| 207452_s_at | -0.0048853  | -0.23133459 | 0.817861196 | 0.898298624 |

|             |             |             |             |             |
|-------------|-------------|-------------|-------------|-------------|
| 207453_s_at | -0.14104676 | -3.12696253 | 0.002749598 | 0.011934061 |
| 207454_at   | 0.012697462 | 0.252400029 | 0.801615602 | 0.888074278 |
| 207455_at   | -0.07810378 | -2.94217979 | 0.004663194 | 0.018624436 |
| 207456_at   | -0.03989561 | -1.09994525 | 0.275856736 | 0.452342295 |
| 207457_s_at | -0.05729526 | -1.25141894 | 0.215757244 | 0.381761965 |
| 207458_at   | -0.00347296 | -0.09288526 | 0.926311737 | 0.961352533 |
| 207459_x_at | 0.010306462 | 0.259555039 | 0.796117252 | 0.8842186   |
| 207460_at   | 0.018870867 | 0.386168211 | 0.70077145  | 0.823184504 |
| 207461_at   | -0.04146061 | -1.46850869 | 0.147316939 | 0.290435778 |
| 207462_at   | -0.11003031 | -2.66704654 | 0.009878207 | 0.03454086  |
| 207463_x_at | -0.2391245  | -4.10275894 | 0.000127885 | 0.000908363 |
| 207464_at   | 0.125842821 | 1.901056262 | 0.062218734 | 0.151395418 |
| 207465_at   | -0.01308772 | -0.66929554 | 0.505936977 | 0.677533796 |
| 207466_at   | 0.06151244  | 1.549621643 | 0.126619705 | 0.260095606 |
| 207467_x_at | 0.550217468 | 5.681701811 | 4.42E-07    | 8.20E-06    |
| 207468_s_at | -0.04739959 | -1.38713318 | 0.17065767  | 0.323324623 |
| 207469_s_at | 0.270831378 | 2.754407002 | 0.007820895 | 0.028545949 |
| 207470_at   | 0.0788368   | 2.360804031 | 0.021584143 | 0.065523607 |
| 207471_at   | -0.01437159 | -0.48281375 | 0.63102788  | 0.774607174 |
| 207472_at   | 0.002467485 | 0.095909915 | 0.923919552 | 0.960185392 |
| 207473_at   | 0.008057423 | 0.213213072 | 0.831901234 | 0.907144808 |
| 207474_at   | 0.022927327 | 1.256037478 | 0.214089918 | 0.379671703 |
| 207475_at   | -0.06446834 | -1.12591473 | 0.26479428  | 0.439724161 |
| 207476_at   | -0.01358366 | -0.30811861 | 0.759085296 | 0.861325819 |
| 207477_at   | -0.00090733 | -0.01887636 | 0.985003897 | 0.992801114 |
| 207478_at   | 0.008190293 | 0.209353372 | 0.834898907 | 0.908942665 |
| 207479_at   | 0.026909078 | 0.97573765  | 0.33320766  | 0.515926994 |
| 207480_s_at | -0.50920094 | -6.08306613 | 9.63E-08    | 2.45E-06    |
| 207481_at   | -0.03168191 | -1.01585283 | 0.313877852 | 0.494964797 |
| 207482_at   | -0.03298292 | -0.65609137 | 0.514334789 | 0.684880684 |
| 207483_s_at | -0.04281799 | -0.65054852 | 0.517882062 | 0.687453521 |
| 207484_s_at | -0.08444528 | -1.68295986 | 0.097707081 | 0.21374207  |
| 207485_x_at | 0.021789615 | 0.394692986 | 0.69450321  | 0.818877943 |
| 207486_x_at | -0.16980707 | -3.24985263 | 0.00191551  | 0.008792481 |
| 207487_at   | -0.01582491 | -0.80415297 | 0.424560813 | 0.606005359 |
| 207488_at   | 0.045030736 | 1.157485383 | 0.251773019 | 0.424638268 |
| 207489_at   | 0.05699175  | 1.856944326 | 0.068350236 | 0.162796246 |
| 207490_at   | 0.195080981 | 3.318059319 | 0.00156203  | 0.007410855 |
| 207491_at   | -0.00030951 | -0.0087114  | 0.993079001 | 0.996975071 |
| 207492_at   | 0.198254234 | 5.475623477 | 9.57E-07    | 1.54E-05    |
| 207493_x_at | 0.023500448 | 0.61297408  | 0.542266603 | 0.707157043 |
| 207494_s_at | -0.00249415 | -0.07333385 | 0.941790342 | 0.969842382 |
| 207495_at   | 0.054085628 | 1.827333243 | 0.072745854 | 0.170557009 |
| 207496_at   | -0.01454224 | -0.64915299 | 0.518777203 | 0.688253355 |
| 207497_s_at | -0.03678056 | -0.89323849 | 0.375385297 | 0.558382376 |
| 207498_s_at | -0.0579915  | -1.50813303 | 0.136896357 | 0.275419645 |
| 207499_x_at | 0.124596555 | 2.748441787 | 0.007947758 | 0.02892989  |
| 207500_at   | -0.00359903 | -0.11859112 | 0.906005126 | 0.950184941 |
| 207501_s_at | -0.31848586 | -5.8177621  | 2.64E-07    | 5.40E-06    |
| 207502_at   | 0.021771688 | 0.54741165  | 0.586176071 | 0.741253493 |
| 207503_at   | -0.04589131 | -0.97423205 | 0.333948183 | 0.516715558 |
| 207504_at   | -0.12218442 | -3.08834265 | 0.003075291 | 0.013117094 |
| 207505_at   | -0.00324262 | -0.07817536 | 0.937955042 | 0.96750215  |
| 207506_at   | 0.023157946 | 0.765614904 | 0.446980056 | 0.626819426 |
| 207507_s_at | -0.48254667 | -4.12885873 | 0.000117151 | 0.000842435 |
| 207508_at   | -0.40333981 | -4.5059937  | 3.21E-05    | 0.00028367  |
| 207509_s_at | -0.01410746 | -0.27221569 | 0.786413593 | 0.878198853 |
| 207510_at   | -0.00183765 | -0.048991   | 0.961093162 | 0.980188777 |
| 207511_s_at | -0.04063846 | -1.2499382  | 0.216293827 | 0.382311413 |
| 207513_s_at | 0.015791648 | 0.238909756 | 0.812009608 | 0.894530027 |
| 207514_s_at | -0.01574582 | -0.40842037 | 0.684454558 | 0.811311085 |
| 207515_s_at | -0.00710346 | -0.22519495 | 0.822611549 | 0.901435743 |
| 207516_at   | -0.01823425 | -0.72381918 | 0.472058124 | 0.648342394 |
| 207517_at   | 0.024466982 | 0.93118843  | 0.355578856 | 0.53865942  |
| 207518_at   | 0.009481702 | 0.533044406 | 0.596019842 | 0.748701972 |
| 207519_at   | -0.01568863 | -0.29429952 | 0.769569621 | 0.868065054 |
| 207520_at   | 0.047829901 | 1.901546224 | 0.062153339 | 0.151261002 |
| 207521_s_at | -0.04960831 | -1.34056572 | 0.185238533 | 0.342802506 |
| 207522_s_at | 0.019055954 | 0.624780213 | 0.534541959 | 0.701154885 |
| 207523_at   | -0.00091396 | -0.02154466 | 0.982884415 | 0.991641329 |
| 207524_at   | 0.020787234 | 0.447283946 | 0.656319971 | 0.792057142 |
| 207525_s_at | -0.07510807 | -1.77191176 | 0.08161109  | 0.186518388 |
| 207526_s_at | 0.405102034 | 1.318429495 | 0.192492851 | 0.352086867 |
| 207527_at   | -0.12107174 | -2.13565492 | 0.036899736 | 0.100342136 |
| 207528_s_at | 0.100356484 | 2.038100889 | 0.046064229 | 0.119727438 |

|             |             |             |             |             |
|-------------|-------------|-------------|-------------|-------------|
| 207529_at   | 0.02023921  | 0.812041546 | 0.420056175 | 0.602244019 |
| 207530_s_at | -0.04904682 | -1.11854503 | 0.267901269 | 0.443265466 |
| 207531_at   | -0.08983957 | -1.56328494 | 0.123373434 | 0.254896445 |
| 207532_at   | -0.03767787 | -0.86917745 | 0.388298253 | 0.571018966 |
| 207533_at   | -0.06355039 | -1.14569131 | 0.256582849 | 0.430175964 |
| 207534_at   | 0.023347302 | 1.112995421 | 0.270257831 | 0.445909956 |
| 207535_s_at | 0.055963996 | 1.438567066 | 0.15559604  | 0.302041359 |
| 207536_s_at | 0.004601507 | 0.112076878 | 0.911145703 | 0.952978153 |
| 207537_at   | -0.00549142 | -0.11780644 | 0.90662413  | 0.950410378 |
| 207538_at   | 0.030950451 | 1.043564649 | 0.300975329 | 0.480451099 |
| 207539_s_at | -0.00040473 | -0.01306277 | 0.989622114 | 0.99512187  |
| 207540_s_at | 0.011557108 | 0.280480885 | 0.780096997 | 0.874290819 |
| 207541_s_at | 0.19728506  | 3.396044898 | 0.001233521 | 0.006078118 |
| 207542_s_at | 0.935636662 | 6.166361563 | 7.01E-08    | 1.91E-06    |
| 207543_s_at | 0.26143354  | 2.948525892 | 0.004580792 | 0.018360963 |
| 207544_s_at | -0.01194678 | -0.45064623 | 0.653908518 | 0.790206196 |
| 207545_s_at | -0.00390306 | -0.20555048 | 0.837854869 | 0.910469873 |
| 207546_at   | 0.106581118 | 1.911277508 | 0.060866558 | 0.148720583 |
| 207547_s_at | 0.846487878 | 6.988813618 | 2.92E-09    | 1.87E-07    |
| 207548_at   | -0.1725212  | -4.1205485  | 0.000120471 | 0.000863248 |
| 207549_x_at | -0.02644133 | -0.45116985 | 0.6535333   | 0.790041617 |
| 207550_at   | 0.092871226 | 2.275571941 | 0.026546209 | 0.077280752 |
| 207551_s_at | -0.02321455 | -0.63633719 | 0.527035882 | 0.695051873 |
| 207552_at   | 0.070648744 | 1.67086132  | 0.100085138 | 0.217728045 |
| 207553_at   | -0.54056697 | -6.25620654 | 4.96E-08    | 1.46E-06    |
| 207554_x_at | -0.02267583 | -0.42556327 | 0.671985882 | 0.802554529 |
| 207555_s_at | -0.00071675 | -0.01097784 | 0.99127844  | 0.99594751  |
| 207556_s_at | -0.57165506 | -5.10854856 | 3.72E-06    | 4.73E-05    |
| 207557_s_at | -0.68584136 | -5.03157513 | 4.92E-06    | 5.95E-05    |
| 207558_s_at | -0.01346633 | -0.69083705 | 0.492397057 | 0.666269317 |
| 207559_s_at | -0.04014692 | -0.94913425 | 0.34645259  | 0.529479068 |
| 207560_at   | 0.037907643 | 0.904450673 | 0.369462016 | 0.552665811 |
| 207561_s_at | -0.14297146 | -4.65449903 | 1.91E-05    | 0.00018331  |
| 207562_at   | 0.010759714 | 0.294747877 | 0.769228771 | 0.867855811 |
| 207563_s_at | -0.05487804 | -0.97120284 | 0.335441379 | 0.51826103  |
| 207564_x_at | -0.25314656 | -2.67520731 | 0.009666916 | 0.033959583 |
| 207565_s_at | 0.03394531  | 1.03284777  | 0.30592146  | 0.486020471 |
| 207566_at   | -0.04942833 | -1.102649   | 0.274690129 | 0.450958794 |
| 207567_at   | -0.04967679 | -1.05410563 | 0.296163964 | 0.475112527 |
| 207568_at   | -0.00656583 | -0.15284184 | 0.879048376 | 0.935104423 |
| 207569_at   | 0.016112943 | 0.56052152  | 0.577261842 | 0.734422964 |
| 207570_at   | -0.0173999  | -0.37237886 | 0.710954939 | 0.830259911 |
| 207571_x_at | 0.210315555 | 3.145376941 | 0.002605949 | 0.011394685 |
| 207572_at   | 0.048981439 | 0.913028977 | 0.364970659 | 0.548333233 |
| 207573_x_at | -0.30447294 | -4.21184151 | 8.85E-05    | 0.000664684 |
| 207574_s_at | 0.314536492 | 1.595902145 | 0.11589315  | 0.243237374 |
| 207575_at   | -0.03031549 | -0.91122269 | 0.365913462 | 0.549232727 |
| 207576_x_at | 0.074640277 | 0.538969704 | 0.591950738 | 0.745644374 |
| 207577_at   | -0.52010013 | -6.58711655 | 1.39E-08    | 5.71E-07    |
| 207578_s_at | 0.076955744 | 1.85523211  | 0.068598163 | 0.163221481 |
| 207579_at   | -0.01946169 | -1.06054523 | 0.293250761 | 0.471813588 |
| 207580_at   | -0.00864546 | -0.42011654 | 0.675937681 | 0.805337283 |
| 207581_s_at | -0.02522477 | -0.79437171 | 0.430186267 | 0.61104388  |
| 207582_at   | -0.10604997 | -2.40362305 | 0.019418508 | 0.060196431 |
| 207583_at   | -0.04998686 | -1.69744614 | 0.094920832 | 0.209181549 |
| 207584_at   | -0.03314113 | -1.26303962 | 0.211580307 | 0.376595925 |
| 207585_s_at | 0.069209824 | 0.861127649 | 0.392679634 | 0.575473445 |
| 207586_at   | 0.008862309 | 0.285009683 | 0.776642182 | 0.871981956 |
| 207587_at   | -0.0108979  | -0.26315626 | 0.79335376  | 0.88237728  |
| 207588_at   | 0.011013608 | 0.658720937 | 0.512656484 | 0.68339926  |
| 207589_at   | 0.024053521 | 0.969922914 | 0.336073621 | 0.518890426 |
| 207590_s_at | -0.025614   | -0.72315178 | 0.472464926 | 0.648677098 |
| 207591_s_at | -0.05045177 | -1.0519155  | 0.297159264 | 0.476179342 |
| 207592_s_at | -0.40314982 | -6.74288123 | 7.59E-09    | 3.68E-07    |
| 207593_at   | -0.11657525 | -2.24298915 | 0.028695378 | 0.082187506 |
| 207594_s_at | -0.42532413 | -6.0759996  | 9.90E-08    | 2.50E-06    |
| 207595_s_at | -0.03081127 | -0.80965123 | 0.421418072 | 0.60337329  |
| 207596_at   | 0.019250224 | 0.757844437 | 0.451582797 | 0.630948146 |
| 207597_at   | -0.00799572 | -0.30796617 | 0.759200705 | 0.861347428 |
| 207598_x_at | 0.142686754 | 2.661377385 | 0.010027462 | 0.03498418  |
| 207599_at   | 0.001199765 | 0.040336111 | 0.967962357 | 0.983744711 |
| 207600_at   | 0.053168046 | 1.00785285  | 0.317671068 | 0.499004338 |
| 207601_at   | -0.0593179  | -1.13382262 | 0.261488816 | 0.435850452 |
| 207602_at   | 0.078600361 | 2.113601612 | 0.038819256 | 0.104336673 |
| 207603_at   | -0.00039006 | -0.02187198 | 0.982624426 | 0.991453715 |

|             |             |             |             |             |
|-------------|-------------|-------------|-------------|-------------|
| 207604_s_at | -0.0621302  | -0.93446642 | 0.353900333 | 0.537045048 |
| 207605_x_at | -0.01730532 | -0.36297609 | 0.717929522 | 0.834869541 |
| 207606_s_at | 0.277381746 | 3.387617816 | 0.001265583 | 0.006204631 |
| 207607_at   | 0.007625439 | 0.402450582 | 0.688817626 | 0.814641259 |
| 207608_x_at | 0.057221733 | 1.358118595 | 0.17963519  | 0.335559285 |
| 207609_s_at | 0.042691751 | 1.172993593 | 0.245547152 | 0.416913354 |
| 207610_s_at | 0.117178433 | 2.657360334 | 0.010134466 | 0.035260665 |
| 207611_at   | -0.07883579 | -1.88834683 | 0.063935548 | 0.154646724 |
| 207612_at   | -0.00962415 | -0.24638725 | 0.806244008 | 0.890971198 |
| 207613_s_at | -0.20892774 | -4.62103285 | 2.15E-05    | 0.000202658 |
| 207614_s_at | -0.12637142 | -2.19325706 | 0.032272196 | 0.090322096 |
| 207615_s_at | -0.01867732 | -0.41197389 | 0.681862552 | 0.809784258 |
| 207616_s_at | -0.09278927 | -3.0946809  | 0.003019473 | 0.012913565 |
| 207617_at   | -0.01506618 | -0.54187577 | 0.589959833 | 0.744244749 |
| 207618_s_at | -0.01500806 | -0.41867119 | 0.676987879 | 0.806201665 |
| 207619_at   | -0.00566617 | -0.19469665 | 0.846304255 | 0.915545841 |
| 207620_s_at | 0.092215169 | 1.650166411 | 0.104262468 | 0.22475874  |
| 207621_s_at | -0.03809656 | -1.02674659 | 0.30876188  | 0.489263436 |
| 207622_s_at | 0.013287682 | 0.331893135 | 0.741154802 | 0.849826575 |
| 207623_at   | 0.000701065 | 0.023049238 | 0.98168935  | 0.990756282 |
| 207624_s_at | 0.140715902 | 2.369819215 | 0.021111037 | 0.064354031 |
| 207625_s_at | 0.039622012 | 1.109126507 | 0.27190931  | 0.447808191 |
| 207626_s_at | 0.080159573 | 2.533605457 | 0.013986821 | 0.045855266 |
| 207627_s_at | -0.10826175 | -1.98559601 | 0.051766469 | 0.131056158 |
| 207628_s_at | 0.051619841 | 1.121039929 | 0.266846581 | 0.442060471 |
| 207629_s_at | -0.24584056 | -4.94832681 | 6.66E-06    | 7.64E-05    |
| 207630_s_at | -0.13714228 | -2.29016739 | 0.025630631 | 0.075182737 |
| 207631_at   | 0.154687333 | 3.440513004 | 0.001076695 | 0.005415832 |
| 207632_at   | -0.02450584 | -0.7283209  | 0.469319354 | 0.646083291 |
| 207633_s_at | -0.00443184 | -0.09549915 | 0.924244382 | 0.960347988 |
| 207634_at   | -0.01690816 | -0.30437859 | 0.761918402 | 0.862984876 |
| 207635_s_at | -0.00783623 | -0.2148289  | 0.830647024 | 0.906219378 |
| 207636_at   | 0.079997743 | 1.945166286 | 0.0565607   | 0.140519806 |
| 207637_at   | -0.12904504 | -2.54427204 | 0.01360883  | 0.044843017 |
| 207638_at   | -0.01880311 | -0.70121531 | 0.485945627 | 0.660741522 |
| 207639_at   | 0.031945822 | 0.627399177 | 0.532836145 | 0.699718303 |
| 207640_x_at | 0.011427837 | 0.341219524 | 0.734159504 | 0.84518834  |
| 207641_at   | -0.03033673 | -0.54212825 | 0.589787018 | 0.74409331  |
| 207642_at   | -0.09366815 | -2.52053471 | 0.014462954 | 0.047123725 |
| 207643_s_at | 0.397107183 | 4.5668514   | 2.60E-05    | 0.000238198 |
| 207644_at   | 0.011813001 | 0.23797128  | 0.812733976 | 0.894899535 |
| 207645_s_at | -0.02893014 | -0.65305809 | 0.516274401 | 0.686195852 |
| 207646_s_at | 0.006123408 | 0.163168045 | 0.87094786  | 0.930293295 |
| 207647_at   | -0.00104803 | -0.05412679 | 0.957018364 | 0.978025456 |
| 207648_at   | -0.0759963  | -1.36872789 | 0.176311631 | 0.331011107 |
| 207649_at   | -0.04317161 | -1.11423893 | 0.269728531 | 0.445365482 |
| 207650_x_at | 0.049071635 | 1.234264197 | 0.222034213 | 0.389027392 |
| 207651_at   | -0.03351728 | -0.93342876 | 0.354431118 | 0.537540196 |
| 207652_s_at | 0.075779613 | 1.593290423 | 0.116478325 | 0.244133064 |
| 207653_at   | 0.010757375 | 0.330134994 | 0.742475987 | 0.850773962 |
| 207654_x_at | -0.14304647 | -2.24317356 | 0.028682794 | 0.082156727 |
| 207655_s_at | 0.101949144 | 1.233395374 | 0.222355651 | 0.389431725 |
| 207656_s_at | 0.018990451 | 0.618371708 | 0.538727909 | 0.704825167 |
| 207657_x_at | 0.345314071 | 5.045814682 | 4.67E-06    | 5.71E-05    |
| 207658_s_at | -0.26867845 | -5.32716045 | 1.66E-06    | 2.44E-05    |
| 207659_s_at | 0.468392758 | 2.90749456  | 0.005138407 | 0.020153199 |
| 207660_at   | 0.152127214 | 2.09106833  | 0.040869856 | 0.108794782 |
| 207661_s_at | 0.006534057 | 0.16973081  | 0.865806774 | 0.927528557 |
| 207662_at   | -0.0137065  | -0.45601029 | 0.650069042 | 0.788037861 |
| 207663_x_at | -0.03038785 | -0.48727153 | 0.627884846 | 0.772425047 |
| 207664_at   | -0.02553872 | -1.28125451 | 0.205154266 | 0.368357361 |
| 207665_at   | -0.00573142 | -0.17356768 | 0.862803755 | 0.92537618  |
| 207666_x_at | 0.049197847 | 1.371443636 | 0.17546848  | 0.329993223 |
| 207667_s_at | 0.002094055 | 0.046499818 | 0.963070078 | 0.98113172  |
| 207668_x_at | 0.084287591 | 1.157226472 | 0.25187791  | 0.424741635 |
| 207669_at   | -0.0531131  | -1.15509883 | 0.252741056 | 0.425733836 |
| 207670_at   | 0.004304777 | 0.131675285 | 0.895692448 | 0.94414182  |
| 207671_s_at | 0.151888313 | 2.494595761 | 0.015451489 | 0.049856181 |
| 207672_at   | 0.289748578 | 3.299109789 | 0.001653508 | 0.007779618 |
| 207673_at   | -0.04144975 | -0.9290818  | 0.356660289 | 0.539785358 |
| 207674_at   | 0.02767107  | 1.118362235 | 0.26797866  | 0.443344276 |
| 207675_x_at | 0.028497725 | 0.691283601 | 0.492118503 | 0.66604132  |
| 207676_at   | -0.14103612 | -2.35289008 | 0.022007238 | 0.066572862 |
| 207677_s_at | 0.004777381 | 0.123634236 | 0.902028216 | 0.947960435 |
| 207678_s_at | 0.013860813 | 0.755661183 | 0.452880953 | 0.632169021 |



|             |             |             |             |             |
|-------------|-------------|-------------|-------------|-------------|
| 207679_at   | -0.00835538 | -0.31038508 | 0.757370029 | 0.860523504 |
| 207680_x_at | 0.014658301 | 0.378550192 | 0.706390708 | 0.82691638  |
| 207681_at   | -0.01032706 | -0.31788441 | 0.751703302 | 0.857171535 |
| 207682_s_at | -0.00360098 | -0.10436458 | 0.917236616 | 0.956085896 |
| 207683_at   | -0.05628087 | -1.26719369 | 0.210101805 | 0.374755343 |
| 207684_at   | 0.017569221 | 0.28034883  | 0.780197803 | 0.87438187  |
| 207685_at   | 0.033811111 | 0.63384383  | 0.528650602 | 0.696185659 |
| 207686_s_at | -0.00725592 | -0.16850634 | 0.866765552 | 0.927869789 |
| 207687_at   | -0.00378121 | -0.07862857 | 0.9375961   | 0.967447878 |
| 207688_s_at | 0.114131702 | 2.853286235 | 0.005971727 | 0.022812924 |
| 207689_at   | 0.041792271 | 0.922948095 | 0.359821097 | 0.542932727 |
| 207690_at   | 0.025059514 | 0.657456987 | 0.513462828 | 0.684086472 |
| 207691_x_at | 0.021477059 | 0.485865938 | 0.628875136 | 0.77304749  |
| 207692_s_at | 0.083533415 | 2.542174467 | 0.013682422 | 0.045042341 |
| 207693_at   | -0.50124478 | -5.02476801 | 5.05E-06    | 6.07E-05    |
| 207694_at   | -0.1034926  | -2.26518692 | 0.027215195 | 0.078735208 |
| 207695_s_at | 0.551053894 | 5.450199379 | 1.05E-06    | 1.66E-05    |
| 207696_at   | 0.005586673 | 0.273682008 | 0.785291904 | 0.877537623 |
| 207697_x_at | 0.101689215 | 2.290664388 | 0.025599954 | 0.075104145 |
| 207698_at   | -0.02925255 | -0.85504034 | 0.396013191 | 0.578688908 |
| 207699_at   | 0.028935777 | 0.695596823 | 0.489432408 | 0.663768309 |
| 207700_s_at | 0.265488262 | 5.146832536 | 3.23E-06    | 4.21E-05    |
| 207701_at   | 0.006731641 | 0.206353403 | 0.837230565 | 0.91020235  |
| 207702_s_at | 0.081139743 | 1.284190522 | 0.20413223  | 0.367147195 |
| 207703_at   | -0.12336553 | -1.95661954 | 0.055165504 | 0.137812002 |
| 207704_s_at | -0.61162215 | -5.45310317 | 1.04E-06    | 1.65E-05    |
| 207705_s_at | 0.178131686 | 3.343202231 | 0.001448014 | 0.006959815 |
| 207706_at   | -0.02636978 | -0.85810202 | 0.394334356 | 0.577011034 |
| 207707_s_at | 0.00797738  | 0.172324761 | 0.863776337 | 0.92611338  |
| 207708_at   | 0.042459312 | 0.763903793 | 0.447991255 | 0.627558462 |
| 207709_at   | -0.08187961 | -2.39194416 | 0.019988997 | 0.061546556 |
| 207710_at   | 0.005692384 | 0.176912531 | 0.860187489 | 0.923745086 |
| 207711_at   | 0.265260146 | 5.333358849 | 1.62E-06    | 2.39E-05    |
| 207712_at   | 0.052044283 | 2.137047565 | 0.036781352 | 0.100093295 |
| 207713_s_at | 0.08677448  | 1.84769485  | 0.06969858  | 0.165197758 |
| 207714_s_at | 0.230542752 | 2.497720457 | 0.015329258 | 0.049522569 |
| 207715_at   | -0.03401647 | -0.95791336 | 0.342044238 | 0.524971361 |
| 207716_at   | -0.0133375  | -0.29678104 | 0.767683686 | 0.866944265 |
| 207717_s_at | -0.10949633 | -3.48268741 | 0.000945586 | 0.004864356 |
| 207718_x_at | 0.002755149 | 0.050605633 | 0.959811975 | 0.979448278 |
| 207719_x_at | 0.1476362   | 2.383336543 | 0.020419018 | 0.062611785 |
| 207720_at   | -0.00463722 | -0.10851533 | 0.913957853 | 0.954246988 |
| 207721_x_at | -0.42118876 | -5.2077334  | 2.58E-06    | 3.50E-05    |
| 207722_s_at | -0.1933825  | -3.6543478  | 0.000552616 | 0.003116304 |
| 207723_s_at | 0.004838764 | 0.088326628 | 0.929918412 | 0.963497351 |
| 207724_s_at | -0.03758773 | -1.17706653 | 0.243930561 | 0.414893616 |
| 207725_at   | 0.194685027 | 4.203814661 | 9.09E-05    | 0.000680517 |
| 207726_at   | -0.01691251 | -0.46185754 | 0.645894541 | 0.785154933 |
| 207727_s_at | 0.221451653 | 5.226683684 | 2.41E-06    | 3.29E-05    |
| 207728_at   | 0.090173021 | 2.571889041 | 0.012672798 | 0.042320308 |
| 207729_at   | -0.12053387 | -2.93611299 | 0.004743254 | 0.018883439 |
| 207730_x_at | 0.284542894 | 4.466339949 | 3.69E-05    | 0.000319922 |
| 207731_at   | -0.00594423 | -0.14146103 | 0.88799122  | 0.939849941 |
| 207732_s_at | -0.11914184 | -3.29248074 | 0.001686687 | 0.007902191 |
| 207733_x_at | -0.00949209 | -0.21638535 | 0.829439328 | 0.905388039 |
| 207734_at   | 0.023471067 | 0.867137524 | 0.389405653 | 0.572308114 |
| 207735_at   | 0.161686455 | 2.881131804 | 0.005529206 | 0.02139862  |
| 207736_s_at | 0.010753023 | 0.372155474 | 0.71112035  | 0.830321629 |
| 207737_at   | -0.00711752 | -0.57310615 | 0.568766849 | 0.72790675  |
| 207738_s_at | -0.19601502 | -3.45517433 | 0.001029274 | 0.005221376 |
| 207739_s_at | -0.03029845 | -0.33757061 | 0.736893734 | 0.847114098 |
| 207740_s_at | -0.09441439 | -2.93938612 | 0.004699903 | 0.018745442 |
| 207741_x_at | 0.064533845 | 1.585703293 | 0.118191792 | 0.246846661 |
| 207742_s_at | -0.01575282 | -0.34745214 | 0.729497248 | 0.842207409 |
| 207743_at   | -0.0003807  | -0.01214384 | 0.990352128 | 0.995408013 |
| 207744_at   | -0.00952168 | -0.52980774 | 0.598248082 | 0.750398476 |
| 207745_at   | -0.02641949 | -0.86550573 | 0.39029291  | 0.57314092  |
| 207746_at   | -0.03496409 | -0.591601   | 0.556394587 | 0.718621201 |
| 207747_s_at | -0.06165221 | -1.66832387 | 0.10058985  | 0.218575879 |
| 207748_at   | 0.028949098 | 0.896451806 | 0.373681612 | 0.556797313 |
| 207749_s_at | 0.068272553 | 2.103584175 | 0.03971954  | 0.106296149 |
| 207750_at   | -0.00247017 | -0.15349887 | 0.878532562 | 0.934898967 |
| 207751_at   | -0.01017169 | -0.3257635  | 0.745764386 | 0.852880113 |
| 207752_x_at | -0.08232287 | -1.35250334 | 0.181413498 | 0.337948899 |
| 207753_at   | -0.12887973 | -2.32305496 | 0.023669571 | 0.070649868 |

|             |             |             |             |             |
|-------------|-------------|-------------|-------------|-------------|
| 207754_at   | -0.01737407 | -0.52922477 | 0.598649832 | 0.750634299 |
| 207755_at   | -0.01093157 | -0.26406963 | 0.792653276 | 0.88192741  |
| 207756_at   | 0.10970001  | 2.376862933 | 0.020747862 | 0.063419973 |
| 207757_at   | 0.068470321 | 2.205828863 | 0.031332812 | 0.088170635 |
| 207758_at   | 0.06039923  | 1.170965971 | 0.246354802 | 0.417907043 |
| 207759_s_at | -0.00446419 | -0.0980982  | 0.922189286 | 0.959301808 |
| 207760_s_at | 0.289557892 | 5.072770546 | 4.24E-06    | 5.26E-05    |
| 207761_s_at | 0.442973468 | 4.411535628 | 4.46E-05    | 0.000374123 |
| 207762_at   | 0.02248434  | 0.636805624 | 0.52673281  | 0.694929675 |
| 207763_at   | 0.023489715 | 0.595151594 | 0.554034878 | 0.716482733 |
| 207764_s_at | -0.01556861 | -0.31522213 | 0.753713456 | 0.858324927 |
| 207765_s_at | -0.07607554 | -2.66895803 | 0.009828341 | 0.034415751 |
| 207766_at   | -0.01916795 | -0.52740096 | 0.599907507 | 0.751536546 |
| 207767_s_at | -0.29513685 | -4.06228438 | 0.000146432 | 0.001014469 |
| 207768_at   | -1.26639808 | -5.96375738 | 1.52E-07    | 3.49E-06    |
| 207769_s_at | -0.13541329 | -2.68286334 | 0.009472458 | 0.033399851 |
| 207770_x_at | 0.021879061 | 0.550692621 | 0.583938995 | 0.739675496 |
| 207771_at   | 0.034760934 | 1.0777043   | 0.28558475  | 0.46336372  |
| 207772_s_at | -0.88654104 | -7.74476575 | 1.55E-10    | 2.79E-08    |
| 207773_x_at | -0.04672626 | -1.44836585 | 0.15284761  | 0.298247703 |
| 207774_at   | 0.020259392 | 0.538319749 | 0.592396445 | 0.74585626  |
| 207775_at   | -0.01688436 | -0.82443415 | 0.413038044 | 0.595313992 |
| 207776_s_at | -0.58240233 | -6.44906508 | 2.36E-08    | 8.31E-07    |
| 207777_s_at | 0.012114367 | 0.327525687 | 0.744438228 | 0.852007304 |
| 207778_at   | -0.10217122 | -1.74197631 | 0.086762394 | 0.195492056 |
| 207779_at   | -0.0390529  | -1.20354877 | 0.233606341 | 0.402356042 |
| 207780_at   | 0.034853008 | 1.232073551 | 0.222845341 | 0.38996844  |
| 207781_s_at | -0.08227258 | -3.01259108 | 0.003821438 | 0.015778613 |
| 207782_s_at | -0.1432758  | -1.23077944 | 0.223325533 | 0.390487664 |
| 207783_x_at | -0.02186532 | -0.85096125 | 0.398256782 | 0.580600604 |
| 207784_at   | -0.08882548 | -1.43589749 | 0.15635145  | 0.303047055 |
| 207785_s_at | 0.524941956 | 6.05516713  | 1.07E-07    | 2.66E-06    |
| 207786_at   | 0.012112804 | 0.508037061 | 0.613335549 | 0.76163241  |
| 207787_at   | -0.00748057 | -0.20485592 | 0.838394999 | 0.910715049 |
| 207788_s_at | 0.129043652 | 2.299023969 | 0.025088814 | 0.073930372 |
| 207789_s_at | -0.57774676 | -6.97962934 | 3.03E-09    | 1.93E-07    |
| 207790_at   | 0.214985587 | 4.27214243  | 7.21E-05    | 0.000559749 |
| 207791_s_at | -0.22240044 | -2.1828857  | 0.033065702 | 0.092084518 |
| 207792_at   | -0.02606161 | -0.6193176  | 0.538109008 | 0.704180364 |
| 207793_s_at | -0.07578816 | -4.22379021 | 8.50E-05    | 0.000642353 |
| 207794_at   | -0.07300229 | -1.5823982  | 0.118944524 | 0.247860712 |
| 207795_s_at | -0.00159134 | -0.04083583 | 0.967565668 | 0.983468294 |
| 207796_x_at | 0.001701996 | 0.056817876 | 0.954883678 | 0.976767183 |
| 207797_s_at | 0.409172868 | 4.3837881   | 4.91E-05    | 0.000405414 |
| 207798_s_at | -0.05989212 | -2.65715763 | 0.010139893 | 0.0352718   |
| 207799_x_at | -0.04257222 | -0.88073826 | 0.382059556 | 0.564848482 |
| 207800_at   | -0.30774722 | -5.93144635 | 1.72E-07    | 3.84E-06    |
| 207801_s_at | -0.116796   | -3.35832878 | 0.001383259 | 0.006691265 |
| 207802_at   | -0.01924357 | -0.95637068 | 0.342816202 | 0.525722873 |
| 207803_s_at | 0.019075351 | 0.407160476 | 0.68537447  | 0.812056093 |
| 207804_s_at | 0.034453462 | 1.233241384 | 0.222412658 | 0.389516303 |
| 207805_s_at | 0.193492827 | 3.05902838  | 0.003346227 | 0.014082496 |
| 207808_s_at | 0.302337852 | 3.035410445 | 0.003580562 | 0.014919119 |
| 207809_s_at | -0.22021176 | -2.96229721 | 0.004406607 | 0.01777598  |
| 207810_at   | -0.02395194 | -0.75368419 | 0.454058328 | 0.633308352 |
| 207811_at   | -0.03869703 | -0.78137219 | 0.437730931 | 0.618184629 |
| 207812_s_at | -0.11926465 | -1.51569893 | 0.134974585 | 0.272608648 |
| 207813_s_at | 0.195814245 | 4.589211913 | 2.40E-05    | 0.000222565 |
| 207814_at   | 0.059362124 | 1.900057948 | 0.062352158 | 0.15159627  |
| 207815_at   | -0.01431372 | -0.83936949 | 0.404675252 | 0.587047077 |
| 207816_at   | 0.044901077 | 1.064007979 | 0.291692437 | 0.470133016 |
| 207817_at   | -0.00656069 | -0.19172051 | 0.848624306 | 0.916879427 |
| 207818_s_at | -0.03428971 | -1.60316857 | 0.114277517 | 0.240694226 |
| 207819_s_at | 0.003978868 | 0.09079447  | 0.927965727 | 0.962371656 |
| 207820_at   | -0.03967449 | -1.29578092 | 0.200134679 | 0.36197568  |
| 207821_s_at | -0.01495235 | -0.19643205 | 0.844952055 | 0.914796475 |
| 207822_at   | 0.029463844 | 0.858157632 | 0.394303902 | 0.577011034 |
| 207823_s_at | -0.07347119 | -1.0931345  | 0.278810763 | 0.455698165 |
| 207824_s_at | -0.14597557 | -3.29927393 | 0.001652695 | 0.007776609 |
| 207825_s_at | -0.00670433 | -0.19968853 | 0.842415911 | 0.913417727 |
| 207826_s_at | 0.924811645 | 6.162423575 | 7.11E-08    | 1.93E-06    |
| 207827_x_at | -0.28270561 | -3.76681057 | 0.000385879 | 0.002300657 |
| 207828_s_at | -0.08629516 | -2.13345468 | 0.03708745  | 0.10070078  |
| 207829_s_at | -0.06017574 | -1.88149995 | 0.064876957 | 0.156398994 |
| 207830_s_at | -0.02295182 | -0.41601263 | 0.678921281 | 0.807707765 |

|             |             |             |             |             |
|-------------|-------------|-------------|-------------|-------------|
| 207831_x_at | -0.17050832 | -3.25922005 | 0.00186285  | 0.008598895 |
| 207832_at   | 0.016745123 | 0.308515004 | 0.758785217 | 0.861205587 |
| 207833_s_at | -0.10067005 | -3.10241099 | 0.002952681 | 0.012671519 |
| 207834_at   | 0.002682282 | 0.051833352 | 0.95883787  | 0.978964872 |
| 207835_at   | -0.01917392 | -0.33944841 | 0.735486217 | 0.84617813  |
| 207836_s_at | 0.147633798 | 4.33721216  | 5.77E-05    | 0.000463914 |
| 207837_at   | -0.02239166 | -0.50188439 | 0.617630489 | 0.765159857 |
| 207838_x_at | 0.39026354  | 3.650672788 | 0.000559086 | 0.003147731 |
| 207839_s_at | -0.03890764 | -1.46056355 | 0.149479425 | 0.293495055 |
| 207840_at   | 0.022283299 | 0.593439814 | 0.555171891 | 0.717496375 |
| 207841_at   | 0.02260924  | 0.453929492 | 0.651557305 | 0.788801578 |
| 207842_s_at | 0.531026275 | 8.142967015 | 3.30E-11    | 1.15E-08    |
| 207843_x_at | 0.097517778 | 1.553716194 | 0.125639798 | 0.25861707  |
| 207844_at   | -0.07962988 | -1.53235143 | 0.130820135 | 0.266469782 |
| 207845_s_at | -0.04653323 | -1.20235603 | 0.234064398 | 0.40294311  |
| 207846_at   | -0.0048105  | -0.31439354 | 0.754339428 | 0.858753317 |
| 207847_s_at | 0.037766181 | 0.981144816 | 0.330557143 | 0.51301385  |
| 207848_at   | 0.085937352 | 0.661576554 | 0.510837225 | 0.681624686 |
| 207849_at   | -0.00511992 | -0.19407152 | 0.846791464 | 0.915775411 |
| 207850_at   | 0.083119466 | 2.481279952 | 0.015982296 | 0.051258038 |
| 207851_s_at | -0.07055641 | -1.28370689 | 0.204300323 | 0.367339477 |
| 207852_at   | -0.02154383 | -1.19377169 | 0.237380364 | 0.406833732 |
| 207853_s_at | -0.43476563 | -5.64330193 | 5.11E-07    | 9.21E-06    |
| 207854_at   | -0.01929199 | -1.12287701 | 0.26607185  | 0.441284118 |
| 207855_s_at | -0.00515297 | -0.13124224 | 0.896033484 | 0.944269577 |
| 207856_s_at | 0.209992936 | 3.174909245 | 0.002390176 | 0.010582698 |
| 207857_at   | 0.123439563 | 3.580446966 | 0.000697552 | 0.003782914 |
| 207858_s_at | -0.03344329 | -0.91406153 | 0.364432412 | 0.54774553  |
| 207859_s_at | -0.04565205 | -1.15423906 | 0.253090449 | 0.42604155  |
| 207860_at   | 0.004271525 | 0.122967815 | 0.902553602 | 0.948256278 |
| 207861_at   | -0.04056882 | -1.12010511 | 0.267241423 | 0.442527329 |
| 207862_at   | -0.04642998 | -0.81344152 | 0.419259766 | 0.601549316 |
| 207863_at   | -0.02387471 | -0.6257041  | 0.533939877 | 0.700591322 |
| 207864_at   | 0.010070607 | 0.264246138 | 0.792517932 | 0.881842684 |
| 207865_s_at | -0.02479281 | -0.56711886 | 0.572800802 | 0.730888816 |
| 207866_at   | 0.006062274 | 0.195532379 | 0.845653007 | 0.915240087 |
| 207867_at   | -0.05780098 | -1.65932359 | 0.102396857 | 0.221620351 |
| 207868_at   | 0.012582743 | 0.311637646 | 0.756422612 | 0.85978889  |
| 207869_s_at | 0.004123212 | 0.20247067  | 0.840250507 | 0.91209719  |
| 207870_at   | 0.004428805 | 0.140349478 | 0.888865462 | 0.940441431 |
| 207871_s_at | 0.190098938 | 3.15461637  | 0.002536553 | 0.011135918 |
| 207872_s_at | -0.02227466 | -0.68801753 | 0.494157863 | 0.667661383 |
| 207873_x_at | -0.06565216 | -1.13076801 | 0.262762145 | 0.437401885 |
| 207874_s_at | 0.00213883  | 0.055806209 | 0.955686138 | 0.977223897 |
| 207875_at   | -0.02628332 | -1.22117119 | 0.226914513 | 0.394448207 |
| 207876_s_at | 0.15647055  | 3.300873896 | 0.001644783 | 0.007747174 |
| 207877_s_at | 0.047717054 | 1.3434605   | 0.184305417 | 0.341570711 |
| 207878_at   | -0.04475882 | -0.84992244 | 0.398829401 | 0.581169989 |
| 207879_at   | -0.00655917 | -0.3588753  | 0.720978927 | 0.836847865 |
| 207880_at   | -0.08554746 | -1.92187427 | 0.059491151 | 0.146023284 |
| 207881_at   | -0.01332678 | -0.86283789 | 0.391746211 | 0.574557681 |
| 207882_at   | 0.045622688 | 1.570797953 | 0.121617017 | 0.252089779 |
| 207883_s_at | -0.0610798  | -1.45438441 | 0.151178357 | 0.295959662 |
| 207884_at   | 0.038289744 | 1.104010119 | 0.27410415  | 0.450311081 |
| 207885_at   | 0.024637078 | 0.526775408 | 0.600339159 | 0.751950833 |
| 207886_s_at | 0.009367989 | 0.364893958 | 0.716504945 | 0.833944445 |
| 207887_s_at | 0.05505542  | 1.257180956 | 0.21367859  | 0.379138589 |
| 207888_at   | 0.010062182 | 0.432251343 | 0.667146149 | 0.79956139  |
| 207889_at   | 0.004072036 | 0.09650323  | 0.923450384 | 0.959921025 |
| 207890_s_at | -0.0015596  | -0.02477388 | 0.980319548 | 0.990134042 |
| 207891_s_at | 0.152679362 | 3.22642257  | 0.002053427 | 0.009311258 |
| 207892_at   | 0.012573293 | 0.3100034   | 0.7576588   | 0.860634656 |
| 207893_at   | 0.015529903 | 0.280237024 | 0.780283154 | 0.874421578 |
| 207894_s_at | -0.05621804 | -1.58162088 | 0.119122117 | 0.248103535 |
| 207895_at   | 0.058492315 | 1.483247946 | 0.143370308 | 0.284752724 |
| 207896_s_at | 0.281023124 | 2.770396001 | 0.007489977 | 0.027530394 |
| 207897_at   | 0.002924324 | 0.0586766   | 0.95340945  | 0.976080838 |
| 207899_at   | -0.01060555 | -0.44824533 | 0.655630081 | 0.791459662 |
| 207900_at   | 0.034173051 | 0.939383576 | 0.351392112 | 0.534600227 |
| 207901_at   | 0.003168625 | 0.164951458 | 0.869550221 | 0.929489081 |
| 207902_at   | -0.04311565 | -1.19002456 | 0.238838435 | 0.408570898 |
| 207904_s_at | 0.018457651 | 0.716752756 | 0.476375382 | 0.652232357 |
| 207906_at   | -0.02336415 | -0.54810445 | 0.585703354 | 0.740919945 |
| 207907_at   | 0.018699578 | 0.448065925 | 0.6557588   | 0.791572286 |
| 207908_at   | 0.079803148 | 1.590412497 | 0.117125901 | 0.245202865 |

|             |             |             |             |             |
|-------------|-------------|-------------|-------------|-------------|
| 207909_x_at | -0.00167317 | -0.07252394 | 0.942432067 | 0.970197267 |
| 207910_at   | 0.005129651 | 0.168418525 | 0.866834323 | 0.927892751 |
| 207911_s_at | -0.04559363 | -0.85675492 | 0.395072478 | 0.57769815  |
| 207912_s_at | -0.0314553  | -1.56582802 | 0.122776645 | 0.253986939 |
| 207913_at   | -0.01110991 | -0.31316457 | 0.755268183 | 0.859381176 |
| 207914_x_at | 0.000444397 | 0.008455957 | 0.993281941 | 0.997061131 |
| 207915_at   | -0.06177449 | -1.05641398 | 0.295117414 | 0.473997662 |
| 207916_at   | 0.024522445 | 1.045685771 | 0.300002888 | 0.479326793 |
| 207917_at   | 0.07171091  | 1.728161702 | 0.089228886 | 0.199690405 |
| 207918_s_at | 0.021329843 | 0.647428834 | 0.519884266 | 0.689097054 |
| 207919_at   | 0.093807192 | 2.133684484 | 0.037067805 | 0.100664418 |
| 207920_x_at | -0.01683416 | -0.4674787  | 0.641892205 | 0.782399128 |
| 207921_x_at | -0.00768066 | -0.15409119 | 0.878067599 | 0.934708403 |
| 207922_s_at | -0.09627134 | -1.36006497 | 0.179021898 | 0.33476346  |
| 207923_x_at | 0.006625893 | 0.129714741 | 0.897236602 | 0.944869065 |
| 207924_x_at | -0.01656161 | -0.43069988 | 0.668267587 | 0.800102202 |
| 207925_at   | -0.00825728 | -0.19251145 | 0.848007599 | 0.916456827 |
| 207926_at   | 0.011329677 | 0.350801052 | 0.726996335 | 0.840579521 |
| 207927_at   | -0.01477631 | -0.36356139 | 0.717494661 | 0.83463311  |
| 207928_s_at | -0.00432221 | -0.27091875 | 0.787406089 | 0.878692425 |
| 207929_at   | -0.03446044 | -0.6497897  | 0.518368691 | 0.687837549 |
| 207930_at   | -0.06076284 | -1.2040945  | 0.233396979 | 0.402065102 |
| 207931_s_at | 0.036020764 | 1.404324573 | 0.165503431 | 0.316246071 |
| 207932_at   | 0.029701325 | 1.778765    | 0.080468285 | 0.184567031 |
| 207933_at   | 0.022368992 | 0.454484836 | 0.651159963 | 0.788555509 |
| 207934_at   | -0.0222477  | -1.33902923 | 0.185735266 | 0.343460124 |
| 207935_s_at | 0.005662767 | 0.184415403 | 0.854324672 | 0.920301732 |
| 207936_x_at | -0.10555811 | -2.28054151 | 0.026231263 | 0.076607698 |
| 207937_x_at | -0.02064675 | -0.57672121 | 0.566337959 | 0.726590385 |
| 207938_at   | -0.02373934 | -0.52080464 | 0.604466444 | 0.754802153 |
| 207939_x_at | 0.004419325 | 0.150985678 | 0.880505866 | 0.936028357 |
| 207940_x_at | -0.07416024 | -1.94030369 | 0.057162093 | 0.141667403 |
| 207941_s_at | 0.149386735 | 2.000743965 | 0.050062221 | 0.127558767 |
| 207943_x_at | -0.019012   | -0.56277311 | 0.575737461 | 0.73312079  |
| 207944_at   | -0.00547194 | -0.12598944 | 0.900171801 | 0.946644033 |
| 207945_s_at | -0.08904363 | -1.18654853 | 0.240196805 | 0.410166423 |
| 207946_at   | -0.05562938 | -1.40194925 | 0.166208352 | 0.317267486 |
| 207949_s_at | -0.0315078  | -0.81057666 | 0.420890488 | 0.602821359 |
| 207950_s_at | -0.19171999 | -3.17136115 | 0.002415184 | 0.01067333  |
| 207951_at   | -0.00169809 | -0.04290346 | 0.96592443  | 0.98267914  |
| 207952_at   | 0.024414426 | 0.895984725 | 0.373928951 | 0.557017288 |
| 207953_at   | 0.272782323 | 4.781377079 | 1.21E-05    | 0.000125304 |
| 207954_at   | 0.001150502 | 0.033007364 | 0.973780951 | 0.986726068 |
| 207955_at   | -0.01216001 | -0.29460376 | 0.769338325 | 0.867913682 |
| 207956_x_at | 0.041062012 | 0.799043519 | 0.42749387  | 0.608709211 |
| 207957_s_at | -1.77667834 | -6.99522565 | 2.85E-09    | 1.84E-07    |
| 207958_at   | -0.00529265 | -0.31113702 | 0.756801231 | 0.860106023 |
| 207959_s_at | 0.156805076 | 3.279147576 | 0.00175533  | 0.008174346 |
| 207960_at   | 0.020625854 | 0.50317268  | 0.616730065 | 0.764256206 |
| 207961_x_at | 0.157435415 | 2.696054625 | 0.009145784 | 0.032478616 |
| 207962_at   | 0.009217913 | 0.324733085 | 0.746540198 | 0.853456717 |
| 207963_at   | -0.03461418 | -0.9506476  | 0.345690039 | 0.528805422 |
| 207964_x_at | -0.04653633 | -1.29669707 | 0.199821214 | 0.361558036 |
| 207965_at   | 0.036669374 | 1.00563722  | 0.318727044 | 0.500124607 |
| 207966_s_at | 0.299757258 | 4.421683909 | 4.31E-05    | 0.000363584 |
| 207967_at   | 0.022105266 | 0.353448818 | 0.725021138 | 0.83931196  |
| 207968_s_at | -0.01416676 | -0.35212445 | 0.726008866 | 0.839959311 |
| 207969_x_at | -0.14460688 | -2.65246114 | 0.010266378 | 0.035603705 |
| 207971_s_at | -0.13039955 | -2.49871383 | 0.015290583 | 0.049411911 |
| 207972_at   | -0.00848939 | -0.21968912 | 0.826877202 | 0.903931055 |
| 207973_x_at | -0.0890946  | -1.94507711 | 0.05657168  | 0.140539272 |
| 207974_s_at | -0.20318036 | -1.802015   | 0.076690171 | 0.177633435 |
| 207976_at   | -0.01804992 | -0.60271688 | 0.549023846 | 0.712207528 |
| 207977_s_at | 0.023536153 | 0.908411652 | 0.367383796 | 0.550570606 |
| 207978_s_at | -0.08776614 | -1.85644707 | 0.06842216  | 0.162924139 |
| 207979_s_at | -0.00447841 | -0.15595228 | 0.876606941 | 0.933861706 |
| 207980_s_at | -0.04665759 | -0.90010079 | 0.371752905 | 0.554922539 |
| 207981_s_at | -0.15585021 | -3.2835066  | 0.001732604 | 0.008086207 |
| 207982_at   | 0.001432454 | 0.032695533 | 0.97402856  | 0.986835428 |
| 207983_s_at | 0.310636427 | 6.14084235  | 7.72E-08    | 2.06E-06    |
| 207984_s_at | -0.00342456 | -0.09188215 | 0.927105239 | 0.961841017 |
| 207985_at   | 0.003933559 | 0.087844598 | 0.93029987  | 0.963678884 |
| 207986_x_at | -0.02451479 | -0.81867475 | 0.416290781 | 0.598594144 |
| 207987_s_at | 0.050204986 | 1.873444955 | 0.065999467 | 0.158441912 |
| 207988_s_at | -0.24407291 | -4.13887358 | 0.000113269 | 0.0008182   |

|             |             |             |             |             |
|-------------|-------------|-------------|-------------|-------------|
| 207989_at   | -0.0577692  | -1.7799097  | 0.080278708 | 0.184249508 |
| 207990_x_at | -0.10341164 | -1.82977715 | 0.072374296 | 0.169926557 |
| 207991_x_at | -0.11033218 | -2.61661476 | 0.011280243 | 0.038457291 |
| 207992_s_at | 0.229485892 | 2.538348071 | 0.013817599 | 0.045423768 |
| 207993_s_at | -0.15384128 | -3.27560718 | 0.001773995 | 0.008248374 |
| 207994_s_at | -0.0642125  | -2.17212577 | 0.033906991 | 0.093879543 |
| 207995_s_at | -0.07524675 | -1.98508068 | 0.051825313 | 0.131138992 |
| 207996_s_at | -0.49505963 | -5.47672341 | 9.53E-07    | 1.54E-05    |
| 207998_s_at | -0.0358158  | -0.81560273 | 0.418032095 | 0.600459291 |
| 207999_s_at | 0.056732829 | 1.287447375 | 0.203002961 | 0.365757239 |
| 208000_at   | -0.0048969  | -0.10355144 | 0.91787911  | 0.956525001 |
| 208002_s_at | -0.65813031 | -5.4255066  | 1.15E-06    | 1.79E-05    |
| 208003_s_at | 0.121247481 | 1.426997611 | 0.158890478 | 0.306757668 |
| 208004_at   | -0.1143672  | -1.67745988 | 0.098782338 | 0.215537619 |
| 208005_at   | -0.0369284  | -0.83476496 | 0.407242339 | 0.589584535 |
| 208006_at   | 0.044608638 | 0.870850853 | 0.387391294 | 0.569966147 |
| 208007_at   | -0.01173256 | -0.24720931 | 0.805610806 | 0.890595639 |
| 208008_at   | 0.005628659 | 0.143460646 | 0.886418862 | 0.939208909 |
| 208009_s_at | 0.012124239 | 0.313692459 | 0.754869203 | 0.8591157   |
| 208010_s_at | -0.03419798 | -1.58273939 | 0.118866639 | 0.247756171 |
| 208011_at   | -0.01597594 | -0.69731867 | 0.488362381 | 0.662796585 |
| 208012_x_at | 0.16946177  | 3.44778017  | 0.001052937 | 0.005320765 |
| 208013_s_at | -0.07182237 | -1.92939415 | 0.058531231 | 0.144131478 |
| 208014_x_at | -0.0344189  | -0.76528155 | 0.447176952 | 0.626929328 |
| 208015_at   | 0.143974867 | 2.847078541 | 0.006074741 | 0.023143152 |
| 208016_s_at | -0.04119394 | -1.50661803 | 0.137283763 | 0.27606236  |
| 208017_s_at | -0.18150029 | -4.35396635 | 5.44E-05    | 0.000442385 |
| 208018_s_at | 0.162624791 | 1.63458501  | 0.107500477 | 0.229975172 |
| 208019_at   | -0.03432689 | -2.09783676 | 0.040244232 | 0.107385231 |
| 208020_s_at | -0.11884389 | -2.32006296 | 0.023842293 | 0.071032582 |
| 208021_s_at | 0.117149592 | 2.553336593 | 0.013294912 | 0.044006533 |
| 208022_s_at | 0.545851897 | 7.760268313 | 1.46E-10    | 2.65E-08    |
| 208023_at   | 0.001902622 | 0.056922569 | 0.954800637 | 0.976761934 |
| 208024_s_at | -0.13934448 | -2.31192277 | 0.024317897 | 0.07214175  |
| 208025_s_at | 0.080519277 | 1.764330649 | 0.082890973 | 0.188632995 |
| 208026_at   | 0.003448283 | 0.123200497 | 0.902370157 | 0.948152703 |
| 208027_s_at | -0.01503578 | -0.75829719 | 0.45131386  | 0.630651253 |
| 208028_s_at | 0.058492843 | 1.716907353 | 0.091280834 | 0.203125583 |
| 208029_s_at | 0.181519705 | 1.436533604 | 0.156171191 | 0.302829004 |
| 208030_s_at | 0.174399568 | 3.250224931 | 0.00191339  | 0.008786811 |
| 208031_s_at | 0.062839869 | 1.23039659  | 0.223467736 | 0.390607932 |
| 208032_s_at | -0.2399996  | -5.46698045 | 9.89E-07    | 1.58E-05    |
| 208033_s_at | 0.009488654 | 0.186984727 | 0.852318856 | 0.919044663 |
| 208034_s_at | -0.00257616 | -0.0696494  | 0.944709987 | 0.971451783 |
| 208035_at   | 0.048634507 | 1.108707903 | 0.272088419 | 0.447987607 |
| 208036_at   | -0.02583233 | -0.78431283 | 0.436017443 | 0.616602587 |
| 208037_s_at | 0.048433167 | 1.134490289 | 0.261211081 | 0.435539293 |
| 208038_at   | -0.02954135 | -0.94996176 | 0.346035487 | 0.529116531 |
| 208039_at   | 0.015152671 | 0.301017758 | 0.764467068 | 0.864615895 |
| 208040_s_at | -0.01637247 | -0.42690644 | 0.671012787 | 0.801863779 |
| 208041_at   | -0.01058919 | -0.25001642 | 0.803449568 | 0.889393353 |
| 208042_at   | -0.00117234 | -0.03654988 | 0.970968199 | 0.985267245 |
| 208043_at   | -0.02609172 | -0.36907084 | 0.713405899 | 0.831740309 |
| 208044_s_at | -0.03881596 | -0.94582936 | 0.348121683 | 0.531143461 |
| 208045_at   | 0.001519587 | 0.065823197 | 0.947742768 | 0.97326562  |
| 208046_at   | -0.0232064  | -0.76828571 | 0.445404379 | 0.625621111 |
| 208047_s_at | 0.030251508 | 1.13262848  | 0.261986079 | 0.436467674 |
| 208048_at   | 0.021872494 | 0.438810696 | 0.662413318 | 0.796207197 |
| 208049_s_at | -0.01632307 | -0.49339328 | 0.623579865 | 0.768948516 |
| 208050_s_at | 0.002083812 | 0.045654257 | 0.963741139 | 0.981363824 |
| 208051_s_at | -0.86547096 | -6.59777574 | 1.33E-08    | 5.55E-07    |
| 208052_x_at | 0.030559538 | 0.68246676  | 0.497634414 | 0.670695935 |
| 208053_at   | 0.01599317  | 0.4383318   | 0.662758395 | 0.796407782 |
| 208054_at   | 0.05399486  | 1.815236628 | 0.074608617 | 0.173920733 |
| 208055_s_at | -0.01884833 | -0.82416315 | 0.413190746 | 0.595457269 |
| 208056_s_at | -0.34405688 | -5.98375341 | 1.41E-07    | 3.30E-06    |
| 208057_s_at | -0.02913842 | -0.93516616 | 0.353542691 | 0.536652919 |
| 208058_s_at | -0.03818981 | -1.18732212 | 0.239894017 | 0.409792514 |
| 208059_at   | 0.020354316 | 0.429985887 | 0.668783938 | 0.800482051 |
| 208060_at   | -0.00127233 | -0.03806631 | 0.969764277 | 0.984801785 |
| 208061_at   | 0.0023872   | 0.086953969 | 0.931004719 | 0.964096179 |
| 208062_s_at | -0.01615463 | -0.42138111 | 0.675019369 | 0.804765998 |
| 208063_s_at | 0.048064773 | 1.439512915 | 0.155329075 | 0.301732822 |
| 208064_s_at | -0.35202048 | -5.91243233 | 1.85E-07    | 4.05E-06    |
| 208065_at   | -0.83177792 | -6.54324286 | 1.64E-08    | 6.43E-07    |

|             |             |             |             |             |
|-------------|-------------|-------------|-------------|-------------|
| 208066_s_at | -0.04211844 | -0.65785651 | 0.513207879 | 0.683848734 |
| 208067_x_at | -0.02119052 | -0.53679945 | 0.593439608 | 0.746699033 |
| 208068_x_at | 0.047203    | 1.231351545 | 0.223113154 | 0.390284545 |
| 208069_x_at | 0.078361914 | 2.07345468  | 0.042537701 | 0.112278225 |
| 208070_s_at | 0.138204419 | 2.636348189 | 0.010711354 | 0.036843825 |
| 208071_s_at | 0.022410362 | 0.463936821 | 0.644412834 | 0.784038831 |
| 208072_s_at | 0.013417607 | 0.394434504 | 0.694692959 | 0.819058137 |
| 208073_x_at | -0.26280553 | -4.65777962 | 1.88E-05    | 0.000181702 |
| 208074_s_at | -0.18654398 | -2.88879753 | 0.005412823 | 0.021026499 |
| 208075_s_at | -0.00319606 | -0.08343705 | 0.93378857  | 0.965547147 |
| 208076_at   | -0.03949245 | -0.81675137 | 0.417380496 | 0.599765128 |
| 208077_at   | -0.03217642 | -0.76432479 | 0.447742338 | 0.627367087 |
| 208078_s_at | 0.133401838 | 1.280707884 | 0.205344967 | 0.368550551 |
| 208079_s_at | 0.009528508 | 0.347517427 | 0.729448461 | 0.842172839 |
| 208080_at   | 0.04858398  | 1.548800948 | 0.126816846 | 0.260380323 |
| 208081_s_at | -0.03717747 | -1.11062063 | 0.271270694 | 0.447184994 |
| 208082_x_at | 0.233871484 | 5.243470757 | 2.26E-06    | 3.14E-05    |
| 208083_s_at | 0.020781909 | 0.702125867 | 0.485381842 | 0.660195057 |
| 208084_at   | 0.018193731 | 0.632107568 | 0.529776543 | 0.697159955 |
| 208085_s_at | -0.03197175 | -1.01804887 | 0.312841961 | 0.493872586 |
| 208086_s_at | 0.008145048 | 0.229416494 | 0.819344537 | 0.899311018 |
| 208087_s_at | -0.05845273 | -1.50005521 | 0.138971989 | 0.278479852 |
| 208088_s_at | -0.03550671 | -0.96247078 | 0.339770344 | 0.522630054 |
| 208089_s_at | 0.023106099 | 0.947652004 | 0.347200532 | 0.530226762 |
| 208090_s_at | 0.003773899 | 0.111517168 | 0.911587568 | 0.953154238 |
| 208091_s_at | 0.35535118  | 5.821511333 | 2.61E-07    | 5.34E-06    |
| 208092_s_at | -0.40374039 | -6.26698774 | 4.76E-08    | 1.41E-06    |
| 208093_s_at | -0.51190438 | -7.18112539 | 1.39E-09    | 1.16E-07    |
| 208094_s_at | 0.087714243 | 2.690647558 | 0.009278419 | 0.03285825  |
| 208095_s_at | 0.026205623 | 0.505465412 | 0.615129073 | 0.763205871 |
| 208096_s_at | 0.615752059 | 4.821914908 | 1.05E-05    | 0.000111129 |
| 208097_s_at | 0.07806941  | 0.804058368 | 0.424615007 | 0.606028967 |
| 208098_at   | -0.04947415 | -0.95220666 | 0.344905604 | 0.527799158 |
| 208099_x_at | 0.147746883 | 2.865635015 | 0.005771587 | 0.022181081 |
| 208100_x_at | -0.07778398 | -1.7177276  | 0.09112998  | 0.20285805  |
| 208101_s_at | 0.039287397 | 1.278846031 | 0.205995508 | 0.369360577 |
| 208102_s_at | -0.55183616 | -6.73785053 | 7.74E-09    | 3.72E-07    |
| 208103_s_at | 0.155111023 | 3.762845334 | 0.000390833 | 0.00232523  |
| 208104_s_at | 0.306609974 | 4.613859038 | 2.20E-05    | 0.000206977 |
| 208105_at   | -0.09378684 | -2.25772428 | 0.027705099 | 0.07985272  |
| 208106_x_at | -0.03215317 | -0.57260809 | 0.56910189  | 0.72806726  |
| 208107_s_at | -0.00832519 | -0.25560573 | 0.799150883 | 0.886224093 |
| 208108_s_at | 0.040566937 | 1.483923864 | 0.143191336 | 0.284523705 |
| 208109_s_at | 0.066884127 | 2.500867453 | 0.015207038 | 0.04918461  |
| 208110_x_at | 0.076046559 | 1.808119302 | 0.075723177 | 0.175949893 |
| 208111_at   | -0.01280883 | -0.25970931 | 0.795998816 | 0.884152975 |
| 208112_x_at | 0.196167911 | 6.087543432 | 9.47E-08    | 2.42E-06    |
| 208113_x_at | 0.227150577 | 3.518647564 | 0.000845915 | 0.004432078 |
| 208114_s_at | -0.1079635  | -2.74574152 | 0.008005804 | 0.029122203 |
| 208115_x_at | -0.00217571 | -0.07872096 | 0.937522927 | 0.967438805 |
| 208116_s_at | -0.36852111 | -5.36623286 | 1.44E-06    | 2.16E-05    |
| 208117_s_at | 0.191170505 | 5.258282548 | 2.14E-06    | 3.00E-05    |
| 208118_x_at | -0.01685113 | -0.46473752 | 0.64384264  | 0.783624517 |
| 208119_s_at | -0.09471901 | -2.11654918 | 0.038557762 | 0.103817507 |
| 208120_x_at | -0.01226781 | -0.29269449 | 0.770790183 | 0.868827836 |
| 208121_s_at | -0.77583776 | -5.07825457 | 4.15E-06    | 5.17E-05    |
| 208122_x_at | 0.020657959 | 0.351228408 | 0.726677407 | 0.840406445 |
| 208123_at   | -0.03280282 | -0.87048445 | 0.387589763 | 0.570220609 |
| 208124_s_at | -0.0030569  | -0.09964869 | 0.920963556 | 0.958450616 |
| 208126_s_at | -0.02491076 | -0.43529704 | 0.664946852 | 0.798179112 |
| 208127_s_at | -0.10333118 | -1.93638482 | 0.05765073  | 0.142530642 |
| 208128_x_at | 0.065654566 | 1.827960064 | 0.072650403 | 0.170385034 |
| 208129_x_at | -0.02145414 | -0.43991687 | 0.661616522 | 0.795720279 |
| 208130_s_at | 0.039617356 | 0.82272185  | 0.414003483 | 0.596224782 |
| 208131_s_at | -0.22097641 | -4.70385962 | 1.60E-05    | 0.000158658 |
| 208132_x_at | -0.05231702 | -1.38547558 | 0.171161095 | 0.324050311 |
| 208133_at   | 0.015347177 | 0.594166409 | 0.554689122 | 0.717017593 |
| 208134_x_at | -0.03604508 | -0.79365813 | 0.430598395 | 0.611434945 |
| 208135_at   | 0.004853485 | 0.144469053 | 0.885626095 | 0.938700708 |
| 208136_s_at | 0.000120161 | 0.004100536 | 0.996742191 | 0.998529588 |
| 208137_x_at | 0.264349256 | 5.28112289  | 1.97E-06    | 2.80E-05    |
| 208138_at   | -0.00532508 | -0.11373072 | 0.909840236 | 0.952419072 |
| 208139_s_at | -0.12965405 | -2.22974888 | 0.029611728 | 0.084245169 |
| 208140_s_at | 0.16957839  | 1.841987783 | 0.07054165  | 0.166597956 |
| 208141_s_at | 0.141289413 | 2.048885641 | 0.044962594 | 0.117396054 |

|             |             |             |             |             |
|-------------|-------------|-------------|-------------|-------------|
| 208142_at   | -0.0208097  | -1.02520705 | 0.309481435 | 0.490042331 |
| 208143_s_at | 0.002913533 | 0.181970781 | 0.856234034 | 0.921359195 |
| 208144_s_at | 0.067349255 | 2.480985633 | 0.015994212 | 0.051285214 |
| 208145_at   | 0.040958849 | 1.556531892 | 0.124969469 | 0.257498178 |
| 208146_s_at | -0.11234696 | -1.66179945 | 0.101897151 | 0.220852934 |
| 208147_s_at | -0.14076936 | -3.79760632 | 0.000349401 | 0.002113877 |
| 208148_at   | -0.00916671 | -0.4092944  | 0.683816669 | 0.810962839 |
| 208149_x_at | 0.082371067 | 1.628774729 | 0.108728646 | 0.231914315 |
| 208151_x_at | 0.263828906 | 1.441952905 | 0.154642038 | 0.300777351 |
| 208152_s_at | 0.124070101 | 3.248758937 | 0.001921749 | 0.008812517 |
| 208153_s_at | -0.10397487 | -2.7526414  | 0.007858249 | 0.028659476 |
| 208154_at   | -0.01695998 | -0.61137665 | 0.543316159 | 0.707927723 |
| 208155_x_at | -0.05069509 | -0.56525713 | 0.574057982 | 0.73191451  |
| 208156_x_at | 0.011268805 | 0.256024417 | 0.79882912  | 0.886019533 |
| 208157_at   | 0.012410062 | 0.220385459 | 0.82633742  | 0.903752925 |
| 208158_s_at | 0.168207713 | 2.360147521 | 0.021618963 | 0.06559812  |
| 208159_x_at | 0.087278889 | 1.731777843 | 0.088577719 | 0.198541323 |
| 208160_at   | 0.036106523 | 0.966959922 | 0.337540258 | 0.520310048 |
| 208161_s_at | 0.032101529 | 0.719829281 | 0.474493046 | 0.650492123 |
| 208162_s_at | -0.01155295 | -0.35242757 | 0.725782754 | 0.839828155 |
| 208163_s_at | -0.04418284 | -1.10998842 | 0.271540781 | 0.44745137  |
| 208164_s_at | 0.008256823 | 0.230904191 | 0.818193983 | 0.898563633 |
| 208165_s_at | 0.027745139 | 0.745175434 | 0.459145785 | 0.637687419 |
| 208166_at   | 0.019625319 | 0.852792503 | 0.39724858  | 0.579565617 |
| 208167_s_at | -0.03557545 | -1.70669023 | 0.093177219 | 0.206346378 |
| 208168_s_at | 0.038438686 | 0.806304327 | 0.423329452 | 0.604989425 |
| 208169_s_at | 0.024693781 | 1.045956785 | 0.299878795 | 0.479214184 |
| 208170_s_at | 0.022572331 | 0.713746079 | 0.478219032 | 0.653775197 |
| 208172_s_at | -0.01203009 | -0.2317273  | 0.817557583 | 0.898055437 |
| 208173_at   | -0.00899324 | -0.18999687 | 0.849968585 | 0.917710628 |
| 208174_x_at | 0.158109283 | 3.130130007 | 0.002724372 | 0.011842974 |
| 208175_s_at | -0.02578767 | -0.80597768 | 0.423516275 | 0.605127702 |
| 208176_at   | -0.03800927 | -0.68706026 | 0.494756464 | 0.668268131 |
| 208177_at   | 0.106016115 | 2.947538179 | 0.004593527 | 0.018393864 |
| 208178_x_at | 0.037684217 | 0.719917134 | 0.474439356 | 0.65043847  |
| 208179_x_at | -0.00535706 | -0.14469085 | 0.885451741 | 0.938609221 |
| 208180_s_at | 0.070700158 | 2.349139976 | 0.022210297 | 0.067037388 |
| 208181_at   | 0.039823242 | 2.019104702 | 0.048061389 | 0.123652042 |
| 208182_x_at | -0.01161076 | -0.24428011 | 0.807867667 | 0.892059638 |
| 208183_at   | -0.01798394 | -0.40076701 | 0.690050011 | 0.815461481 |
| 208184_s_at | -0.04764167 | -0.92901604 | 0.356694082 | 0.539785597 |
| 208185_x_at | 0.071903333 | 2.078539275 | 0.042050279 | 0.111280855 |
| 208186_s_at | 0.017492256 | 0.219913912 | 0.82670294  | 0.903866865 |
| 208187_s_at | -0.02551326 | -0.59159889 | 0.556395986 | 0.718621201 |
| 208188_at   | 0.002038934 | 0.040753519 | 0.967631009 | 0.983475054 |
| 208189_s_at | 0.026440362 | 0.613360289 | 0.542013009 | 0.706974759 |
| 208190_s_at | 0.199686908 | 4.903604472 | 7.83E-06    | 8.71E-05    |
| 208191_x_at | 0.017975906 | 0.346274808 | 0.730377159 | 0.842766085 |
| 208192_at   | -0.00859146 | -0.28915169 | 0.773486398 | 0.870302912 |
| 208193_at   | -0.00619901 | -0.19275207 | 0.84782     | 0.916324921 |
| 208194_s_at | 0.023528339 | 0.906539287 | 0.368365243 | 0.551542077 |
| 208195_at   | 0.07299843  | 1.563619775 | 0.123294726 | 0.254767734 |
| 208196_x_at | -0.01508302 | -0.32975613 | 0.742760792 | 0.850915943 |
| 208198_x_at | 0.017962751 | 0.362770109 | 0.718082584 | 0.83497705  |
| 208199_s_at | 0.051896955 | 1.758668079 | 0.083857806 | 0.190300247 |
| 208200_at   | 0.093166822 | 2.966266196 | 0.004357561 | 0.01760992  |
| 208201_at   | -0.03259523 | -0.70085067 | 0.4861715   | 0.660878519 |
| 208202_s_at | -0.0230548  | -0.72335466 | 0.472341244 | 0.648616569 |
| 208203_x_at | -0.06725296 | -1.2237453  | 0.225948887 | 0.393427657 |
| 208204_s_at | 0.027931783 | 0.812918339 | 0.419557282 | 0.601757163 |
| 208205_at   | -0.01416035 | -0.25674445 | 0.798275861 | 0.885757604 |
| 208206_s_at | -0.80354586 | -7.43997343 | 5.06E-10    | 5.85E-08    |
| 208207_at   | -0.01628285 | -0.64032679 | 0.524457568 | 0.692991681 |
| 208208_at   | 0.104816532 | 2.55826236  | 0.013127092 | 0.043551037 |
| 208209_s_at | 0.02863463  | 0.649996108 | 0.518236298 | 0.687781164 |
| 208210_at   | 0.012695663 | 0.250218049 | 0.803294391 | 0.889338905 |
| 208211_s_at | -0.03743203 | -0.85654694 | 0.39518651  | 0.577802058 |
| 208212_s_at | -0.12616305 | -3.24556878 | 0.001940056 | 0.008882797 |
| 208213_s_at | -1.35069143 | -7.71614444 | 1.73E-10    | 2.98E-08    |
| 208214_at   | -0.10032421 | -3.06721108 | 0.003268437 | 0.013807824 |
| 208215_x_at | -0.03795223 | -0.9234839  | 0.359544269 | 0.542679921 |
| 208216_at   | -0.00580596 | -0.11161535 | 0.911510056 | 0.953154238 |
| 208217_at   | -0.05369615 | -1.327365   | 0.189539194 | 0.348198484 |
| 208218_s_at | -0.113777   | -2.73073506 | 0.008335543 | 0.030081381 |
| 208219_at   | -0.01839471 | -0.68035316 | 0.498961702 | 0.671848347 |

|             |             |             |             |             |
|-------------|-------------|-------------|-------------|-------------|
| 208220_x_at | 0.005915663 | 0.146566586 | 0.88397748  | 0.937993605 |
| 208221_s_at | -0.11341745 | -3.04418647 | 0.003491754 | 0.014618357 |
| 208222_at   | 0.020462068 | 0.421902494 | 0.674640889 | 0.804513843 |
| 208223_s_at | -0.04419947 | -1.24770126 | 0.217106305 | 0.383272041 |
| 208224_at   | -0.00884237 | -0.14867032 | 0.88232451  | 0.937050569 |
| 208225_at   | -0.00101517 | -0.03316492 | 0.973655846 | 0.98668149  |
| 208226_x_at | 0.006527561 | 0.205953858 | 0.837541214 | 0.910362914 |
| 208227_x_at | 0.092287719 | 2.69325056  | 0.00921435  | 0.032672779 |
| 208228_s_at | 0.202197293 | 1.684756754 | 0.097357869 | 0.213227379 |
| 208229_at   | -0.12451379 | -4.28273585 | 6.95E-05    | 0.000542203 |
| 208230_s_at | -0.04538943 | -0.8460351  | 0.400976719 | 0.583238994 |
| 208231_at   | 0.007532592 | 0.339042365 | 0.735790493 | 0.846368329 |
| 208232_x_at | -0.02748195 | -0.44140834 | 0.660542819 | 0.794856749 |
| 208233_at   | -0.00748008 | -0.30999408 | 0.757665851 | 0.860634656 |
| 208234_x_at | -0.0030684  | -0.06277905 | 0.950156222 | 0.974445405 |
| 208235_x_at | -0.09459251 | -0.88968818 | 0.377273364 | 0.559932659 |
| 208237_x_at | -0.01633486 | -0.3954958  | 0.693913997 | 0.818506805 |
| 208238_x_at | 0.272893257 | 5.195147427 | 2.71E-06    | 3.63E-05    |
| 208239_at   | 0.001921297 | 0.065463645 | 0.948027801 | 0.973379399 |
| 208240_s_at | 0.018633    | 0.176473205 | 0.860531031 | 0.924023481 |
| 208241_at   | -0.01639885 | -0.32440724 | 0.746785584 | 0.853698461 |
| 208242_at   | -0.05314839 | -0.86265633 | 0.39184524  | 0.574665205 |
| 208243_s_at | -0.11294204 | -2.71417173 | 0.008713926 | 0.031188495 |
| 208244_at   | 0.008342535 | 0.292256337 | 0.771123482 | 0.868990812 |
| 208245_at   | 0.0016782   | 0.097335004 | 0.9227927   | 0.959594475 |
| 208246_x_at | 0.349423264 | 5.312102876 | 1.76E-06    | 2.55E-05    |
| 208247_at   | 0.082260888 | 1.685723359 | 0.097170442 | 0.212942109 |
| 208248_x_at | -0.06387343 | -1.51686193 | 0.134681086 | 0.272212694 |
| 208249_s_at | 0.131813745 | 3.785754346 | 0.000363031 | 0.00218072  |
| 208250_s_at | 0.001142209 | 0.027835359 | 0.977888099 | 0.988801627 |
| 208251_at   | -0.01993258 | -0.59715423 | 0.552706159 | 0.715157604 |
| 208252_s_at | -0.0046825  | -0.1452944  | 0.884977327 | 0.93843797  |
| 208253_at   | 0.129718139 | 3.526855443 | 0.000824609 | 0.004338249 |
| 208254_at   | 0.030479724 | 0.998323394 | 0.322229555 | 0.504110523 |
| 208255_s_at | -0.25893336 | -5.04816095 | 4.63E-06    | 5.67E-05    |
| 208256_at   | -0.01643453 | -0.63294524 | 0.529233167 | 0.696768064 |
| 208257_x_at | -0.00466426 | -0.07938196 | 0.936999442 | 0.96732401  |
| 208258_s_at | -0.04432783 | -0.84660231 | 0.400662953 | 0.582967466 |
| 208259_x_at | -0.00061427 | -0.01595827 | 0.987321921 | 0.993904661 |
| 208260_at   | 0.016210502 | 0.432457612 | 0.666997109 | 0.799498825 |
| 208261_x_at | 0.042658888 | 1.39137344  | 0.169375055 | 0.321526992 |
| 208262_x_at | -0.03662667 | -0.88774852 | 0.378307413 | 0.56086631  |
| 208263_at   | -0.00448325 | -0.13635981 | 0.892004493 | 0.942178691 |
| 208264_s_at | 0.025934906 | 0.471106112 | 0.639315091 | 0.780663115 |
| 208265_at   | -0.11907721 | -2.23729561 | 0.02908631  | 0.083088586 |
| 208266_at   | -0.0036727  | -0.0856854  | 0.932008769 | 0.964688867 |
| 208267_at   | 0.045182874 | 1.176032102 | 0.24434041  | 0.41543691  |
| 208268_at   | 0.075612814 | 1.476319003 | 0.14521514  | 0.287420507 |
| 208269_s_at | -0.03443198 | -0.82024603 | 0.415401835 | 0.597583893 |
| 208270_s_at | 0.207625493 | 3.783890947 | 0.000365219 | 0.0021921   |
| 208271_at   | 0.004992695 | 0.209036527 | 0.835145098 | 0.909017719 |
| 208272_at   | -0.08690496 | -1.59982943 | 0.115017677 | 0.241854241 |
| 208273_at   | 0.022794463 | 0.583960638 | 0.561489316 | 0.722859874 |
| 208274_at   | 0.021392414 | 0.778224946 | 0.439569207 | 0.620075343 |
| 208275_x_at | 0.010460798 | 0.246218142 | 0.806374284 | 0.891005006 |
| 208276_at   | -0.02901658 | -0.85380343 | 0.396692689 | 0.579135826 |
| 208277_at   | 0.020770582 | 0.37629965  | 0.708053932 | 0.82797421  |
| 208278_s_at | -0.02945361 | -0.62163254 | 0.536595872 | 0.702858813 |
| 208279_s_at | 0.045032962 | 1.013226937 | 0.315119544 | 0.496398529 |
| 208280_at   | -0.01494257 | -0.48568748 | 0.629000916 | 0.773164877 |
| 208281_x_at | 0.011354048 | 0.208893336 | 0.835256364 | 0.909029038 |
| 208282_x_at | 0.009610787 | 0.49779132  | 0.620495158 | 0.767113959 |
| 208283_at   | -0.06641847 | -1.95198651 | 0.055726299 | 0.138917881 |
| 208284_x_at | 0.0263696   | 0.51652498  | 0.607432769 | 0.757080297 |
| 208285_at   | 0.179469972 | 2.331510394 | 0.023187462 | 0.069433438 |
| 208286_x_at | 0.054066722 | 1.407732629 | 0.164496062 | 0.314805721 |
| 208287_at   | 0.024103589 | 0.647175193 | 0.520047232 | 0.689189688 |
| 208288_at   | -0.07016953 | -1.68787571 | 0.096754157 | 0.212269244 |
| 208289_s_at | -0.12465783 | -2.88228206 | 0.005511596 | 0.021345255 |
| 208290_s_at | -0.30157005 | -2.48962345 | 0.01564781  | 0.050362374 |
| 208291_s_at | -0.25571459 | -4.73147495 | 1.45E-05    | 0.000145549 |
| 208292_at   | -0.03105154 | -0.71813122 | 0.475531469 | 0.651416166 |
| 208293_x_at | -0.05883138 | -1.40520955 | 0.16524139  | 0.315812873 |
| 208294_x_at | 0.038471229 | 1.177472567 | 0.243769824 | 0.414670965 |
| 208295_x_at | 0.018542932 | 0.478853225 | 0.633826069 | 0.776710727 |



|             |             |             |             |             |
|-------------|-------------|-------------|-------------|-------------|
| 208296_x_at | 0.154620889 | 3.803681034 | 0.000342607 | 0.002078995 |
| 208297_s_at | 0.055331209 | 1.513852265 | 0.135441663 | 0.273342009 |
| 208298_at   | 0.009368154 | 0.333995028 | 0.739576328 | 0.848943283 |
| 208299_at   | -0.0249349  | -0.4683498  | 0.641272925 | 0.782025575 |
| 208300_at   | 0.021040573 | 0.500691475 | 0.618464776 | 0.765726452 |
| 208301_at   | 0.076212984 | 2.11711404  | 0.038507826 | 0.103730441 |
| 208302_at   | 0.019786491 | 0.708352997 | 0.481535989 | 0.656782935 |
| 208303_s_at | -0.04051761 | -0.65818889 | 0.512995822 | 0.683628522 |
| 208304_at   | -0.04549926 | -0.9286169  | 0.35689923  | 0.539952192 |
| 208305_at   | 0.009350069 | 0.313103976 | 0.755313984 | 0.859381176 |
| 208306_x_at | 0.305153653 | 3.487610314 | 0.00093131  | 0.004804029 |
| 208307_at   | -0.02310367 | -0.73346669 | 0.466199814 | 0.643672452 |
| 208308_s_at | -0.50113199 | -6.25550203 | 4.98E-08    | 1.46E-06    |
| 208309_s_at | 0.05814613  | 1.213758184 | 0.229712199 | 0.397594888 |
| 208310_s_at | -0.14141082 | -1.80982149 | 0.075455357 | 0.175464426 |
| 208311_at   | 0.02994242  | -0.76794538 | 0.44560498  | 0.625725886 |
| 208312_s_at | 0.029490435 | 0.772174405 | 0.443116011 | 0.623366828 |
| 208313_s_at | 0.029250118 | 0.338822586 | 0.735955205 | 0.846449341 |
| 208314_at   | -0.06145056 | -1.4691461  | 0.147144521 | 0.290180316 |
| 208315_x_at | 0.033362078 | 0.765432858 | 0.447087575 | 0.626882032 |
| 208316_s_at | -0.09505919 | -2.26975186 | 0.026919313 | 0.078066182 |
| 208317_at   | -0.02974802 | -1.7278517  | 0.089284893 | 0.199785732 |
| 208318_s_at | -0.00418843 | -0.13053311 | 0.896591995 | 0.944613141 |
| 208319_s_at | 0.007917305 | 0.043252423 | 0.965647446 | 0.982486811 |
| 208320_at   | -0.24296937 | -2.54885831 | 0.013449172 | 0.044434862 |
| 208321_s_at | -0.49428519 | -5.06008541 | 4.44E-06    | 5.47E-05    |
| 208322_s_at | 0.062753108 | 1.292714136 | 0.20118667  | 0.363334329 |
| 208323_s_at | 0.020290793 | 0.543729741 | 0.588691365 | 0.743285233 |
| 208324_at   | -0.02604287 | -0.75077001 | 0.455797061 | 0.634752656 |
| 208325_s_at | -0.02278945 | -0.70499218 | 0.483609505 | 0.658646229 |
| 208327_at   | -0.08404569 | -1.49399943 | 0.140544293 | 0.280824677 |
| 208328_s_at | -0.03730136 | -1.05084613 | 0.297646072 | 0.47672012  |
| 208329_at   | -0.02053877 | -0.55781627 | 0.57909594  | 0.735818831 |
| 208330_at   | 0.044571905 | 1.183381766 | 0.24143917  | 0.411737298 |
| 208331_at   | -0.05907822 | -0.90013745 | 0.371733559 | 0.554922539 |
| 208332_at   | -0.00566218 | -0.10276414 | 0.918501233 | 0.956991154 |
| 208333_at   | -0.0396325  | -1.11702833 | 0.268543874 | 0.444016382 |
| 208334_at   | -0.00958749 | -0.19764635 | 0.844006165 | 0.914320242 |
| 208335_s_at | 0.054036156 | 0.571291653 | 0.569987902 | 0.728595924 |
| 208336_s_at | 0.114946659 | 1.886858533 | 0.064139191 | 0.155021834 |
| 208337_s_at | 0.004322654 | 0.128482014 | 0.898207723 | 0.945478623 |
| 208338_at   | -0.01159546 | -0.38882069 | 0.698818828 | 0.821796953 |
| 208339_at   | -0.00906042 | -0.36151701 | 0.71901399  | 0.835608832 |
| 208340_at   | 0.001306051 | 0.055550631 | 0.955888872 | 0.977324608 |
| 208341_x_at | -0.00792406 | -0.20710825 | 0.836643739 | 0.909918516 |
| 208342_x_at | -0.00067656 | -0.01783726 | 0.985829311 | 0.993167574 |
| 208343_s_at | -0.00250213 | -0.15926595 | 0.874007322 | 0.932239193 |
| 208344_x_at | -0.06237845 | -1.40042206 | 0.166662794 | 0.317917692 |
| 208345_s_at | -0.24827324 | -3.08501915 | 0.003104944 | 0.013225901 |
| 208346_at   | -0.00353292 | -0.0840068  | 0.933337516 | 0.965360791 |
| 208347_at   | 0.019149103 | 0.443377271 | 0.659126487 | 0.794066434 |
| 208348_s_at | 0.007639313 | 0.295889589 | 0.768361019 | 0.867402326 |
| 208349_at   | -0.00399733 | -0.11717559 | 0.907121822 | 0.950686813 |
| 208350_at   | -0.01656698 | -0.71701496 | 0.476214794 | 0.652092394 |
| 208351_s_at | -0.61534484 | -5.52268811 | 8.03E-07    | 1.34E-05    |
| 208352_x_at | -0.02186944 | -0.43619932 | 0.664295887 | 0.797526239 |
| 208353_x_at | -0.02130227 | -0.41548645 | 0.679304195 | 0.808012751 |
| 208354_s_at | -0.01196037 | -0.31812142 | 0.751524434 | 0.857012945 |
| 208356_x_at | 0.051625235 | 1.868376412 | 0.066714178 | 0.159776542 |
| 208357_x_at | 0.032175401 | 0.931381356 | 0.355479924 | 0.538563432 |
| 208358_s_at | 0.131674407 | 0.835361572 | 0.40690916  | 0.589292129 |
| 208359_s_at | -0.88243865 | -6.60808412 | 1.28E-08    | 5.41E-07    |
| 208360_s_at | -0.06622005 | -1.19680234 | 0.236205816 | 0.405380374 |
| 208361_s_at | 0.013365604 | 0.422779857 | 0.674004194 | 0.804008478 |
| 208363_s_at | -0.38617786 | -7.55139938 | 3.28E-10    | 4.52E-08    |
| 208364_at   | -0.26838306 | -6.60819769 | 1.28E-08    | 5.41E-07    |
| 208365_s_at | -0.00524892 | -0.14113027 | 0.888251349 | 0.940036214 |
| 208366_at   | 0.014586246 | 0.591227674 | 0.556642987 | 0.718815578 |
| 208367_x_at | -0.06991696 | -1.84489716 | 0.070110799 | 0.16591961  |
| 208368_s_at | -0.00551445 | -0.24736878 | 0.805487988 | 0.89055412  |
| 208369_s_at | 0.184371219 | 4.398741061 | 4.66E-05    | 0.000388148 |
| 208370_s_at | -0.17407625 | -2.62817455 | 0.010943738 | 0.037496028 |
| 208371_s_at | 0.077742558 | 2.233975206 | 0.029316461 | 0.083576612 |
| 208372_s_at | -0.07998459 | -2.35262917 | 0.022021311 | 0.066599611 |
| 208373_s_at | 0.021917677 | 0.580417354 | 0.563859874 | 0.724388452 |

|             |             |             |             |             |
|-------------|-------------|-------------|-------------|-------------|
| 208374_s_at | 0.304709341 | 3.990579602 | 0.000185851 | 0.001238598 |
| 208375_at   | 0.018241913 | 0.706099609 | 0.482925706 | 0.657986303 |
| 208376_at   | 0.029517548 | 0.564511996 | 0.574561524 | 0.732326707 |
| 208377_s_at | -0.02924781 | -0.60870322 | 0.545074986 | 0.70931886  |
| 208378_x_at | -0.03641154 | -0.95614644 | 0.342928509 | 0.525822929 |
| 208379_x_at | -0.00849323 | -0.19861051 | 0.843255285 | 0.913878652 |
| 208380_at   | 0.010295762 | 0.37229781  | 0.711014951 | 0.830270062 |
| 208381_s_at | 0.022279567 | 0.568132658 | 0.572116775 | 0.730398003 |
| 208382_s_at | -0.0338322  | -0.72525275 | 0.471184987 | 0.647574344 |
| 208383_s_at | 0.059697005 | 1.73102987  | 0.088712085 | 0.198746066 |
| 208384_s_at | -0.02581321 | -0.69036651 | 0.492690676 | 0.666444663 |
| 208385_at   | 0.021161289 | 0.522235699 | 0.603476038 | 0.754243009 |
| 208386_x_at | 0.086756894 | 3.889687485 | 0.000259019 | 0.001641999 |
| 208387_s_at | -0.02929725 | -1.0373257  | 0.303848088 | 0.483654904 |
| 208388_at   | -0.02583225 | -0.78796417 | 0.433895359 | 0.61462272  |
| 208389_s_at | -0.09624059 | -0.75636749 | 0.452460751 | 0.631799534 |
| 208390_s_at | -0.10866639 | -1.82823148 | 0.072609105 | 0.170321528 |
| 208391_s_at | 0.071716869 | 1.7854316   | 0.079369427 | 0.18249619  |
| 208392_x_at | 0.072998106 | 2.263043082 | 0.027355142 | 0.079042865 |
| 208393_s_at | 0.089901442 | 1.778435578 | 0.080522911 | 0.184654418 |
| 208394_x_at | -0.01485358 | -0.61395601 | 0.541621967 | 0.706728823 |
| 208395_s_at | 0.041918481 | 1.027150042 | 0.308573502 | 0.489034288 |
| 208396_s_at | 0.050587586 | 0.507252466 | 0.613882492 | 0.762037506 |
| 208397_x_at | -0.04226953 | -0.90455899 | 0.369405088 | 0.552631469 |
| 208398_s_at | -0.15724246 | -2.89618712 | 0.005302783 | 0.020690761 |
| 208399_s_at | -0.02829922 | -0.58311567 | 0.562054172 | 0.723152832 |
| 208400_at   | -0.03226785 | -1.42031208 | 0.160818744 | 0.30947056  |
| 208401_s_at | 0.018093122 | 0.379028816 | 0.706037175 | 0.826762391 |
| 208402_at   | -0.06277446 | -1.81406473 | 0.074791183 | 0.174276273 |
| 208403_x_at | -0.0254096  | -0.65899963 | 0.512478783 | 0.683264275 |
| 208404_x_at | 0.053476903 | 1.493734506 | 0.140613395 | 0.280912514 |
| 208405_s_at | 0.376145247 | 4.121522579 | 0.000120077 | 0.000860703 |
| 208406_s_at | -0.06423863 | -1.38600904 | 0.170998954 | 0.323853092 |
| 208407_s_at | 0.237886458 | 4.204950453 | 9.06E-05    | 0.00067848  |
| 208408_at   | -0.06546126 | -1.44093203 | 0.154929202 | 0.301165494 |
| 208409_at   | -0.06316537 | -1.30630395 | 0.196556308 | 0.357340215 |
| 208410_x_at | 0.004891116 | 0.206561024 | 0.837069149 | 0.910083365 |
| 208411_x_at | -0.00042006 | -0.01837556 | 0.985401709 | 0.993045305 |
| 208412_s_at | -0.03161847 | -1.20179442 | 0.234280302 | 0.403141547 |
| 208413_at   | 0.004500436 | 0.211608231 | 0.833147348 | 0.907662074 |
| 208414_s_at | -0.02168427 | -0.41647631 | 0.678583919 | 0.807411078 |
| 208415_x_at | 0.017186537 | 0.520752361 | 0.604502641 | 0.754817613 |
| 208416_s_at | -0.15749551 | -3.68242472 | 0.000505489 | 0.002891872 |
| 208417_at   | -0.07586383 | -1.97692383 | 0.052764384 | 0.13297315  |
| 208420_x_at | -0.06300335 | -2.02785174 | 0.047132684 | 0.121774419 |
| 208421_at   | 0.026282655 | 0.806376483 | 0.423288189 | 0.604989425 |
| 208422_at   | -0.00637971 | -0.18794026 | 0.85157314  | 0.918571751 |
| 208423_s_at | 0.011976925 | 0.371971144 | 0.711256854 | 0.830362271 |
| 208424_s_at | -0.25325715 | -4.93121346 | 7.08E-06    | 8.06E-05    |
| 208425_s_at | -0.31369139 | -5.22903517 | 2.39E-06    | 3.27E-05    |
| 208426_x_at | 0.041814245 | 0.730306015 | 0.468114513 | 0.645174077 |
| 208427_s_at | -0.09614747 | -3.1302267  | 0.002723605 | 0.011841838 |
| 208428_at   | -0.0345111  | -0.72966808 | 0.468501506 | 0.645426817 |
| 208429_x_at | -0.02966453 | -0.42529173 | 0.672182674 | 0.802703756 |
| 208430_s_at | 0.408245269 | 3.68004523  | 0.000509329 | 0.002911232 |
| 208431_s_at | -0.02233109 | -0.59197069 | 0.556148653 | 0.718467859 |
| 208432_s_at | -0.09103734 | -2.44383764 | 0.017564084 | 0.055447769 |
| 208433_s_at | -0.01405082 | -0.24466493 | 0.807571079 | 0.891798243 |
| 208434_at   | -0.01699775 | -0.41001243 | 0.683292802 | 0.810621201 |
| 208435_s_at | 0.004261506 | 0.082701793 | 0.934370672 | 0.965819187 |
| 208436_s_at | 0.298556861 | 3.780726197 | 0.000368965 | 0.002212505 |
| 208437_at   | 0.015275135 | 0.240957902 | 0.810429309 | 0.893563593 |
| 208438_s_at | 0.241729398 | 4.721818351 | 1.50E-05    | 0.000149976 |
| 208439_s_at | -0.00818749 | -0.15312939 | 0.878822621 | 0.93501563  |
| 208440_at   | -0.0359641  | -0.66909803 | 0.506062042 | 0.677597927 |
| 208441_at   | -0.03162009 | -0.59992086 | 0.550873176 | 0.71365366  |
| 208442_s_at | 0.18113331  | 2.639132851 | 0.010633216 | 0.036634267 |
| 208443_x_at | -0.01685069 | -0.52348098 | 0.602614813 | 0.753581787 |
| 208445_s_at | 0.173091784 | 4.456874104 | 3.81E-05    | 0.000329419 |
| 208446_s_at | -0.0707759  | -2.37980241 | 0.020597961 | 0.063043697 |
| 208447_s_at | -0.21188752 | -2.04924455 | 0.044926328 | 0.117328783 |
| 208448_x_at | -0.00882052 | -0.21040865 | 0.834079071 | 0.908477818 |
| 208449_s_at | 0.045162366 | 1.457295567 | 0.150376074 | 0.294792273 |
| 208450_at   | -0.09042236 | -1.40738235 | 0.164599379 | 0.31493612  |
| 208451_s_at | 1.064531541 | 6.61499446  | 1.25E-08    | 5.28E-07    |

|             |             |             |             |             |
|-------------|-------------|-------------|-------------|-------------|
| 208452_x_at | -0.0767676  | -1.90059965 | 0.062279729 | 0.151498023 |
| 208453_s_at | -0.16758723 | -3.21320376 | 0.002135306 | 0.009628871 |
| 208454_s_at | 0.240956977 | 5.035809013 | 4.85E-06    | 5.87E-05    |
| 208455_at   | -0.01595976 | -0.38373151 | 0.702567021 | 0.824401522 |
| 208456_s_at | 0.032590971 | 1.097112341 | 0.277082783 | 0.453686893 |
| 208457_at   | -0.77173174 | -8.81663155 | 2.46E-12    | 3.33E-09    |
| 208458_at   | -0.02468975 | -0.51858295 | 0.606005514 | 0.755891667 |
| 208459_s_at | -0.19167847 | -3.78327775 | 0.000365942 | 0.002196145 |
| 208460_at   | -0.00064291 | -0.01840373 | 0.985379331 | 0.993045305 |
| 208461_at   | -0.02075858 | -0.45897167 | 0.647953418 | 0.786419741 |
| 208462_s_at | 0.002997108 | 0.067349329 | 0.946533007 | 0.972403125 |
| 208463_at   | -0.4340538  | -7.82772229 | 1.12E-10    | 2.24E-08    |
| 208464_at   | 0.084293545 | 2.23939069  | 0.028941913 | 0.082766316 |
| 208465_at   | -0.00118029 | -0.0242655  | 0.980723324 | 0.99031249  |
| 208466_at   | -0.02615858 | -0.72922392 | 0.468771059 | 0.645658166 |
| 208467_at   | 0.02044018  | 0.664328604 | 0.509087225 | 0.680183147 |
| 208468_at   | -0.09134725 | -1.59351515 | 0.116427881 | 0.244061673 |
| 208469_s_at | 0.080389357 | 2.34741564  | 0.022304226 | 0.067243689 |
| 208470_s_at | 0.288946053 | 3.148460902 | 0.00258259  | 0.011310253 |
| 208471_at   | 0.059388045 | 0.924760928 | 0.358885037 | 0.541996083 |
| 208472_at   | -0.0211459  | -0.52062578 | 0.604590285 | 0.754863781 |
| 208473_s_at | -0.06224711 | -1.32657897 | 0.189797637 | 0.348527432 |
| 208474_at   | -0.06665869 | -1.08033746 | 0.284420766 | 0.461911147 |
| 208475_at   | 0.127570587 | 2.005701957 | 0.049514994 | 0.126545782 |
| 208476_s_at | 0.170301191 | 2.917151953 | 0.005001771 | 0.019726363 |
| 208477_at   | -0.23407986 | -3.4735243  | 0.000972712 | 0.004980805 |
| 208478_s_at | -0.12350766 | -2.30887207 | 0.024498301 | 0.072546917 |
| 208479_at   | -0.19078827 | -3.67720236 | 0.000513953 | 0.002931975 |
| 208480_s_at | 0.021355295 | 0.575948343 | 0.566856804 | 0.726817887 |
| 208481_at   | -0.02932552 | -0.99760057 | 0.322577099 | 0.504536142 |
| 208482_at   | 0.067770295 | 1.929007195 | 0.058580302 | 0.144214545 |
| 208483_x_at | 0.041552832 | 1.368259905 | 0.176457239 | 0.331187088 |
| 208484_at   | 0.044347782 | 1.362927252 | 0.178122916 | 0.333584872 |
| 208485_x_at | 0.087437365 | 1.483825185 | 0.143217453 | 0.28456295  |
| 208486_at   | -0.03191441 | -0.5583066  | 0.578763297 | 0.735584383 |
| 208487_at   | 0.021105048 | 0.398708424 | 0.691558047 | 0.816762566 |
| 208488_s_at | 0.034887025 | 1.254425993 | 0.214670589 | 0.380359954 |
| 208489_at   | -0.01097792 | -0.22085513 | 0.825973392 | 0.903506988 |
| 208490_x_at | 0.066621618 | 1.742328634 | 0.086700235 | 0.195361848 |
| 208491_s_at | 0.032473631 | 0.72219436  | 0.473048853 | 0.649189318 |
| 208492_at   | -0.07452615 | -2.66830734 | 0.00984529  | 0.0344616   |
| 208493_at   | -0.04421136 | -0.87804139 | 0.383509234 | 0.566174304 |
| 208494_at   | 0.018780558 | 0.499313543 | 0.619429087 | 0.766368373 |
| 208495_at   | -0.04021616 | -0.98786711 | 0.327281537 | 0.509575894 |
| 208496_x_at | 0.144262309 | 3.562034952 | 0.00073894  | 0.003971893 |
| 208497_x_at | -0.03697993 | -0.91300409 | 0.364983636 | 0.548334296 |
| 208498_s_at | -0.17385496 | -1.87540744 | 0.065724482 | 0.157947977 |
| 208499_s_at | 0.085133462 | 2.34760281  | 0.022294013 | 0.067221969 |
| 208500_x_at | -0.05855581 | -1.8836867  | 0.064575024 | 0.155814005 |
| 208501_at   | -0.01182978 | -0.48444716 | 0.629875414 | 0.773893938 |
| 208502_s_at | 0.130673726 | 2.894049067 | 0.005334406 | 0.020790554 |
| 208503_s_at | 0.153722575 | 2.017329525 | 0.04825178  | 0.12399499  |
| 208504_x_at | -0.00073552 | -0.01900064 | 0.984905182 | 0.992738275 |
| 208505_s_at | 0.021723196 | 0.442892505 | 0.659475083 | 0.794066434 |
| 208506_at   | 0.010242109 | 0.397302961 | 0.692588357 | 0.817560668 |
| 208507_at   | -0.00371038 | -0.08146075 | 0.935353295 | 0.966404879 |
| 208508_s_at | -0.03596583 | -1.05786071 | 0.294462804 | 0.473147754 |
| 208509_s_at | 0.023708187 | 0.828231144 | 0.410902083 | 0.593169076 |
| 208510_s_at | -0.07525623 | -2.39830943 | 0.019676233 | 0.060776158 |
| 208511_at   | -0.06975571 | -1.53367594 | 0.130494113 | 0.265969969 |
| 208512_s_at | 0.013337686 | 0.449315809 | 0.654862262 | 0.790853196 |
| 208513_at   | -0.02091377 | -0.45329294 | 0.652012876 | 0.789096606 |
| 208514_at   | -0.03487488 | -0.88456559 | 0.38000814  | 0.562659813 |
| 208515_at   | -0.01902438 | -0.54882586 | 0.585211316 | 0.74057654  |
| 208516_at   | -0.05258393 | -1.66336371 | 0.101582463 | 0.220320461 |
| 208517_x_at | -0.13149372 | -1.94609369 | 0.056446616 | 0.140283165 |
| 208518_s_at | -0.02493278 | -0.69125051 | 0.492139141 | 0.66604132  |
| 208519_x_at | 0.002368192 | 0.061384931 | 0.951261658 | 0.975105834 |
| 208520_at   | -0.00187154 | -0.03217596 | 0.974441133 | 0.987141536 |
| 208521_at   | 0.030300546 | 0.614381603 | 0.541342684 | 0.706584984 |
| 208522_s_at | -0.05950678 | -2.15210126 | 0.035522722 | 0.097385689 |
| 208523_x_at | -0.03339021 | -0.9692646  | 0.336399112 | 0.519213603 |
| 208524_at   | -0.0290315  | -0.70174495 | 0.485617646 | 0.660419229 |
| 208525_s_at | -0.00879606 | -0.29034592 | 0.772577226 | 0.869852744 |
| 208526_at   | 0.037767866 | 1.30535259  | 0.196877828 | 0.35777899  |

|             |             |             |             |             |
|-------------|-------------|-------------|-------------|-------------|
| 208527_x_at | 0.030280375 | 0.838144686 | 0.405357126 | 0.587729251 |
| 208528_x_at | -0.03622037 | -0.6993117  | 0.487125445 | 0.661585461 |
| 208529_at   | -0.00240388 | -0.13147277 | 0.895851932 | 0.94414182  |
| 208530_s_at | -0.43519004 | -6.59615691 | 1.34E-08    | 5.56E-07    |
| 208531_at   | -0.04340361 | -0.96488709 | 0.338568781 | 0.521275996 |
| 208532_x_at | 0.027729609 | 0.824453509 | 0.413027136 | 0.595313992 |
| 208533_at   | -0.00562489 | -0.20579957 | 0.837661178 | 0.91038568  |
| 208534_s_at | 0.133835021 | 1.942287919 | 0.056916033 | 0.141190683 |
| 208535_x_at | 0.006445873 | 0.192741009 | 0.847828623 | 0.916324921 |
| 208536_s_at | -0.01002294 | -0.37884483 | 0.706173064 | 0.826778492 |
| 208537_at   | -0.05430729 | -0.98005619 | 0.331089642 | 0.513642312 |
| 208538_at   | -0.03854513 | -0.954676   | 0.343665544 | 0.526523377 |
| 208539_x_at | -0.01905321 | -0.31611187 | 0.753041466 | 0.857887565 |
| 208540_x_at | 0.146769713 | 3.334857591 | 0.001484953 | 0.007103996 |
| 208541_x_at | 0.072205571 | 1.493747645 | 0.140609967 | 0.280912514 |
| 208542_x_at | -0.04142009 | -1.1329936  | 0.261833965 | 0.436295573 |
| 208543_at   | 0.018057269 | 0.734568017 | 0.465533689 | 0.643192063 |
| 208544_at   | -0.01563019 | -0.32121956 | 0.749187547 | 0.855371334 |
| 208545_x_at | 0.032043759 | 0.662390549 | 0.510319278 | 0.681177623 |
| 208546_x_at | 0.07127244  | 1.732180407 | 0.088505472 | 0.198429145 |
| 208547_at   | -0.01184206 | -0.5260901  | 0.600812211 | 0.752290347 |
| 208548_at   | -0.00543792 | -0.25468631 | 0.799857569 | 0.886783781 |
| 208549_x_at | 0.412341397 | 6.65794451  | 1.05E-08    | 4.65E-07    |
| 208550_x_at | -0.00365911 | -0.04952398 | 0.96067024  | 0.980033198 |
| 208551_at   | -0.02221165 | -0.49995292 | 0.618981553 | 0.766069163 |
| 208552_at   | -0.13019593 | -2.82626551 | 0.006432222 | 0.024269215 |
| 208553_at   | -0.02434987 | -0.93492531 | 0.353665766 | 0.536780221 |
| 208554_at   | -0.00728101 | -0.21545358 | 0.830162267 | 0.905867423 |
| 208555_x_at | -0.01733475 | -0.43460481 | 0.665446455 | 0.798435701 |
| 208556_at   | -0.03453745 | -0.79258493 | 0.431218667 | 0.612082343 |
| 208557_at   | 0.030822946 | 0.580940976 | 0.563509244 | 0.724208631 |
| 208558_at   | 0.127144874 | 2.233864667 | 0.02932415  | 0.083591971 |
| 208559_at   | -0.03856392 | -0.81629954 | 0.417636738 | 0.600036616 |
| 208560_at   | -0.00718088 | -0.17876631 | 0.85873818  | 0.923009301 |
| 208561_at   | 0.126188231 | 2.876631053 | 0.005598612 | 0.0216279   |
| 208562_s_at | 0.120882087 | 2.634894441 | 0.010752353 | 0.036964937 |
| 208563_x_at | -0.08943987 | -2.15366005 | 0.035394571 | 0.097111804 |
| 208564_at   | -0.08678237 | -1.87354578 | 0.065985316 | 0.158434816 |
| 208565_at   | -0.05270986 | -1.23841816 | 0.220502089 | 0.387471763 |
| 208566_at   | 0.005451194 | 0.193662964 | 0.847109912 | 0.91595181  |
| 208567_s_at | -0.06985713 | -1.49287132 | 0.140838734 | 0.281174159 |
| 208568_at   | 0.005044203 | 0.102514125 | 0.918698804 | 0.957062018 |
| 208569_at   | 0.016801442 | 0.574534026 | 0.567806877 | 0.727347443 |
| 208570_at   | -0.05450655 | -1.25863084 | 0.213157883 | 0.378488531 |
| 208571_at   | -0.03107424 | -0.88595831 | 0.379263381 | 0.561892165 |
| 208572_at   | 0.092603091 | 2.878257813 | 0.005573433 | 0.021551123 |
| 208573_s_at | 0.044775996 | 0.976108653 | 0.333025351 | 0.515734052 |
| 208574_at   | -0.02481573 | -0.86653968 | 0.389730576 | 0.572672658 |
| 208575_at   | 0.023569442 | 0.769623793 | 0.444616184 | 0.624769265 |
| 208576_s_at | -0.0205187  | -0.72705472 | 0.470088766 | 0.646755545 |
| 208577_at   | 0.009027106 | 0.221025521 | 0.825841336 | 0.903446528 |
| 208578_at   | 0.003163006 | 0.052637315 | 0.958200018 | 0.97865248  |
| 208579_x_at | -0.0127952  | -0.27949271 | 0.780851429 | 0.874741498 |
| 208580_x_at | -0.03731274 | -0.69214175 | 0.491583436 | 0.665631913 |
| 208581_x_at | 0.733332229 | 4.573514305 | 2.54E-05    | 0.000233357 |
| 208582_s_at | 0.029106753 | 0.861607549 | 0.392417573 | 0.575208541 |
| 208583_x_at | 0.056262283 | 1.162355391 | 0.249805875 | 0.422203387 |
| 208584_at   | 0.045129189 | 0.999229033 | 0.321794462 | 0.503735134 |
| 208585_at   | -0.04552091 | -1.02081561 | 0.311540157 | 0.492495939 |
| 208586_s_at | 0.000987961 | 0.053601042 | 0.957435448 | 0.978260883 |
| 208587_s_at | 0.036384576 | 1.080923436 | 0.284162183 | 0.461608617 |
| 208588_at   | -0.04696656 | -1.6710743  | 0.100042869 | 0.217678475 |
| 208589_at   | -0.04029981 | -0.92601231 | 0.358239802 | 0.541296005 |
| 208590_x_at | 0.030971366 | 0.635644644 | 0.527484122 | 0.695428195 |
| 208591_s_at | -0.02953549 | -0.68282638 | 0.497408772 | 0.670553596 |
| 208592_s_at | -0.02179053 | -0.45092556 | 0.653708341 | 0.790079508 |
| 208593_x_at | 0.037289098 | 1.010249695 | 0.316531376 | 0.497710314 |
| 208594_x_at | 0.032330523 | 0.733361304 | 0.466263581 | 0.643672452 |
| 208595_s_at | -0.01928059 | -0.49729541 | 0.620842641 | 0.767227748 |
| 208596_s_at | -0.04508783 | -0.87723514 | 0.383943294 | 0.566627932 |
| 208597_at   | -0.03229378 | -0.8249754  | 0.412733155 | 0.595063603 |
| 208598_s_at | -0.07131003 | -1.82848007 | 0.072571298 | 0.170245996 |
| 208599_at   | 0.017684878 | 0.608438343 | 0.545249406 | 0.709373364 |
| 208600_s_at | 0.016574982 | 0.40837383  | 0.684488532 | 0.811311085 |
| 208601_s_at | -0.00636684 | -0.2467325  | 0.805978059 | 0.890787432 |

|             |             |             |             |             |
|-------------|-------------|-------------|-------------|-------------|
| 208602_x_at | -0.07316319 | -1.38791771 | 0.170419802 | 0.32304372  |
| 208603_s_at | -0.39916733 | -5.50896978 | 8.45E-07    | 1.39E-05    |
| 208604_s_at | 0.026581168 | 0.488756722 | 0.626839215 | 0.771563475 |
| 208605_s_at | -0.08377144 | -1.83153964 | 0.072107326 | 0.169495641 |
| 208606_s_at | -0.00617475 | -0.15872256 | 0.874433524 | 0.932452518 |
| 208607_s_at | -0.09345839 | -1.34176634 | 0.184851086 | 0.342244751 |
| 208608_s_at | 0.006112078 | 0.112391323 | 0.910897477 | 0.952923153 |
| 208609_s_at | 0.188696181 | 4.158306524 | 0.000106087 | 0.000774138 |
| 208610_s_at | 0.526263177 | 5.229753294 | 2.38E-06    | 3.27E-05    |
| 208611_s_at | -0.13452138 | -2.61455418 | 0.011341207 | 0.03862977  |
| 208612_at   | 0.18314006  | 1.303969569 | 0.197345938 | 0.358309351 |
| 208613_s_at | -0.02891901 | -0.71956698 | 0.47465337  | 0.650632082 |
| 208614_s_at | 0.180661837 | 3.315846292 | 0.001572462 | 0.007453225 |
| 208615_s_at | 0.54649317  | 5.733917938 | 3.63E-07    | 6.98E-06    |
| 208616_s_at | 0.365339991 | 4.308858189 | 6.36E-05    | 0.000502718 |
| 208617_s_at | 0.30401379  | 4.240529894 | 8.03E-05    | 0.000612393 |
| 208619_at   | 0.081775157 | 1.874759745 | 0.06581513  | 0.158088097 |
| 208620_at   | -0.02010315 | -0.28412639 | 0.77731565  | 0.872311137 |
| 208621_s_at | 0.05056237  | 0.549706324 | 0.584611056 | 0.740195969 |
| 208622_s_at | 0.373270203 | 3.183992708 | 0.002327258 | 0.010352324 |
| 208623_s_at | 0.845784471 | 6.637064861 | 1.14E-08    | 4.94E-07    |
| 208624_s_at | -0.02052988 | -0.51595098 | 0.60783113  | 0.757407819 |
| 208625_s_at | 0.229068187 | 4.191974465 | 9.47E-05    | 0.000703023 |
| 208626_s_at | 0.065775057 | 2.15279653  | 0.035465513 | 0.097270616 |
| 208627_s_at | 0.160852806 | 2.219014567 | 0.030373491 | 0.085936444 |
| 208628_s_at | 0.238742305 | 3.552469533 | 0.000761355 | 0.004069154 |
| 208629_s_at | 0.08305947  | 1.559410544 | 0.124287112 | 0.256399539 |
| 208630_at   | 0.232951712 | 5.408395681 | 1.23E-06    | 1.89E-05    |
| 208631_s_at | 0.193875728 | 3.127370857 | 0.002746334 | 0.011923367 |
| 208632_at   | -0.09695456 | -2.12794658 | 0.037561033 | 0.101750376 |
| 208633_s_at | 0.218650174 | 3.683263256 | 0.000504142 | 0.002885645 |
| 208634_s_at | 0.329272179 | 5.620230983 | 5.57E-07    | 9.87E-06    |
| 208635_x_at | -0.14759536 | -2.6528037  | 0.010257104 | 0.035579825 |
| 208636_at   | -0.72256928 | -7.0434534  | 2.37E-09    | 1.63E-07    |
| 208637_x_at | -0.62493379 | -6.43795939 | 2.47E-08    | 8.57E-07    |
| 208638_at   | -0.10261702 | -1.11055998 | 0.271296594 | 0.447211101 |
| 208639_x_at | 0.021666714 | 0.280717121 | 0.779916672 | 0.874164147 |
| 208640_at   | 0.048979352 | 1.282018859 | 0.204887825 | 0.368055255 |
| 208641_s_at | 0.165299832 | 3.122338158 | 0.00278682  | 0.01207568  |
| 208642_s_at | 0.047656165 | 0.662024221 | 0.510552338 | 0.68137249  |
| 208643_s_at | -0.15889994 | -2.26337038 | 0.027333735 | 0.079006274 |
| 208644_at   | 0.132212263 | 3.131801747 | 0.002711145 | 0.011800824 |
| 208645_s_at | 0.011846121 | 0.302918283 | 0.763025494 | 0.863704185 |
| 208646_at   | 0.065649762 | 1.24618007  | 0.217660103 | 0.383976684 |
| 208647_at   | 0.400193363 | 5.202128216 | 2.64E-06    | 3.55E-05    |
| 208648_at   | 0.117965303 | 2.608070927 | 0.01153498  | 0.039200163 |
| 208649_s_at | -0.01448683 | -0.30499854 | 0.761448559 | 0.862649471 |
| 208650_s_at | 0.391610909 | 2.673454067 | 0.009711958 | 0.034085662 |
| 208651_x_at | 0.48840712  | 3.178049017 | 0.002368249 | 0.010504347 |
| 208652_at   | -0.32924787 | -4.60090543 | 2.30E-05    | 0.000214881 |
| 208653_s_at | 0.015671461 | 0.182539133 | 0.855790048 | 0.921009333 |
| 208654_s_at | 0.158650428 | 1.144148659 | 0.257216778 | 0.43096227  |
| 208655_at   | 0.045947109 | 0.785393457 | 0.435388765 | 0.61604111  |
| 208656_s_at | 0.100400123 | 2.085105344 | 0.041428018 | 0.10990093  |
| 208657_s_at | 0.272413272 | 4.410735138 | 4.48E-05    | 0.00037495  |
| 208658_at   | 0.303446062 | 4.161865921 | 0.00010482  | 0.000766454 |
| 208659_at   | 0.410790594 | 4.009719826 | 0.000174427 | 0.001173669 |
| 208660_at   | -0.1232757  | -3.23043391 | 0.00202917  | 0.009216228 |
| 208661_s_at | -0.14339578 | -2.28576063 | 0.025904072 | 0.075840471 |
| 208662_s_at | -0.09301602 | -1.67000712 | 0.100254811 | 0.217991048 |
| 208663_s_at | -0.14153925 | -1.70535339 | 0.09342773  | 0.206767721 |
| 208664_s_at | -0.4363316  | -5.18858452 | 2.77E-06    | 3.70E-05    |
| 208666_s_at | 0.259157466 | 2.950998093 | 0.004549059 | 0.018257145 |
| 208667_s_at | 0.36802896  | 4.928528639 | 7.15E-06    | 8.12E-05    |
| 208668_x_at | 0.087305344 | 1.120091396 | 0.267247217 | 0.442527329 |
| 208669_s_at | -0.37867646 | -3.6597756  | 0.00054319  | 0.003072552 |
| 208670_s_at | -0.14308277 | -1.8513656  | 0.069160818 | 0.16423673  |
| 208671_at   | -0.30049675 | -2.90383133 | 0.005191135 | 0.02031543  |
| 208672_s_at | 0.085661019 | 1.326015055 | 0.189983214 | 0.348766912 |
| 208673_s_at | -0.30859364 | -2.39626127 | 0.01977639  | 0.061030689 |
| 208674_x_at | -0.0380044  | -0.60581783 | 0.546976515 | 0.710686235 |
| 208675_s_at | -0.22461928 | -2.34767081 | 0.022290303 | 0.067217226 |
| 208676_s_at | 0.056566087 | 1.462947983 | 0.148827843 | 0.2926271   |
| 208677_s_at | -0.14316705 | -2.07282062 | 0.042598826 | 0.112406371 |
| 208678_at   | -0.41860079 | -5.1403163  | 3.31E-06    | 4.28E-05    |

|             |             |             |             |             |
|-------------|-------------|-------------|-------------|-------------|
| 208679_s_at | -0.4811725  | -6.03200338 | 1.17E-07    | 2.85E-06    |
| 208680_at   | 0.271639222 | 4.265386151 | 7.38E-05    | 0.000571031 |
| 208682_s_at | 0.135093899 | 2.518226627 | 0.014548539 | 0.047359843 |
| 208683_at   | 0.44035044  | 6.000216342 | 1.32E-07    | 3.15E-06    |
| 208684_at   | -0.0522285  | -0.93966762 | 0.351247578 | 0.53445311  |
| 208685_x_at | 0.115255875 | 2.589900206 | 0.012094237 | 0.040750576 |
| 208686_s_at | 0.073444359 | 1.694325229 | 0.095515515 | 0.210160467 |
| 208687_x_at | -0.15902391 | -1.57808733 | 0.119932107 | 0.24939539  |
| 208688_x_at | 0.123488661 | 2.851075262 | 0.00600823  | 0.022930813 |
| 208689_s_at | 0.127947757 | 2.155545769 | 0.035240084 | 0.096753276 |
| 208690_s_at | 0.388109681 | 4.593127071 | 2.37E-05    | 0.000219793 |
| 208691_at   | 0.336840307 | 2.794769217 | 0.007010245 | 0.026080237 |
| 208692_at   | 0.057878754 | 0.90837165  | 0.367404746 | 0.55058354  |
| 208693_s_at | -0.20407338 | -3.32203098 | 0.001543473 | 0.007336831 |
| 208694_at   | 0.004484623 | 0.069443869 | 0.944872879 | 0.971546272 |
| 208695_s_at | 0.115083648 | 2.612464607 | 0.011403334 | 0.038805895 |
| 208696_at   | -0.1229286  | -2.0452708  | 0.045329275 | 0.11814638  |
| 208697_s_at | -0.11058388 | -2.12055312 | 0.038205011 | 0.103107389 |
| 208698_s_at | -0.08458394 | -1.29580957 | 0.20012487  | 0.361972589 |
| 208699_x_at | -0.08553971 | -1.23480419 | 0.221834604 | 0.388808665 |
| 208700_s_at | 0.145846323 | 1.860000223 | 0.067909624 | 0.16198852  |
| 208701_at   | -0.07979466 | -1.76854397 | 0.082177614 | 0.187349831 |
| 208702_x_at | -0.24282337 | -4.12358785 | 0.000119246 | 0.000855572 |
| 208703_s_at | -0.19145216 | -2.85337911 | 0.005970198 | 0.022810675 |
| 208704_x_at | -0.08559498 | -2.00622451 | 0.049457619 | 0.126423681 |
| 208705_s_at | -0.03443924 | -0.63614405 | 0.527160868 | 0.695145566 |
| 208706_s_at | -0.03488893 | -0.39229268 | 0.696266006 | 0.820198748 |
| 208707_at   | -0.05957475 | -1.25656965 | 0.213898412 | 0.379437479 |
| 208708_x_at | -0.20058482 | -1.8279401  | 0.072653441 | 0.170385034 |
| 208709_s_at | -0.00861991 | -0.27289521 | 0.785893726 | 0.87790348  |
| 208710_s_at | -0.11608831 | -2.65963125 | 0.010073847 | 0.035106219 |
| 208711_s_at | 0.000590757 | 0.02047602  | 0.983733243 | 0.992034976 |
| 208712_at   | 0.17314334  | 1.993128128 | 0.050912929 | 0.129301641 |
| 208713_at   | 0.217822523 | 5.44346406  | 1.08E-06    | 1.70E-05    |
| 208714_at   | -0.18363546 | -1.97671588 | 0.052788513 | 0.133018958 |
| 208715_at   | 0.114253114 | 2.911180793 | 0.00508585  | 0.019982137 |
| 208716_s_at | 0.182636783 | 2.663654612 | 0.009967262 | 0.034804967 |
| 208717_at   | -0.11451426 | -2.40701171 | 0.019255732 | 0.059783062 |
| 208718_at   | 0.239632292 | 5.202232367 | 2.64E-06    | 3.55E-05    |
| 208719_s_at | 0.216797757 | 1.095669607 | 0.277708642 | 0.454395352 |
| 208720_s_at | 0.108577145 | 2.213802553 | 0.030749552 | 0.086797132 |
| 208721_s_at | -0.12271662 | -2.52823956 | 0.014180543 | 0.046357751 |
| 208722_s_at | 0.097081041 | 1.200720188 | 0.234693681 | 0.403544553 |
| 208723_at   | -0.3630625  | -4.80357642 | 1.12E-05    | 0.000117288 |
| 208724_s_at | -0.10177798 | -1.5234262  | 0.133033965 | 0.269725263 |
| 208725_at   | 0.02791477  | 0.474700662 | 0.636765718 | 0.778597856 |
| 208726_s_at | -0.15407596 | -1.92187193 | 0.059491451 | 0.146023284 |
| 208727_s_at | 0.312094856 | 1.508030655 | 0.136922507 | 0.275437734 |
| 208728_s_at | 0.093329575 | 1.676222279 | 0.099025623 | 0.215959261 |
| 208729_x_at | 0.209098769 | 1.86201907  | 0.067619854 | 0.161496959 |
| 208730_x_at | 0.042616442 | 0.507576906 | 0.613656297 | 0.761862527 |
| 208731_at   | -0.36971472 | -3.77749864 | 0.000372824 | 0.00223175  |
| 208732_at   | -0.39770342 | -4.6091081  | 2.24E-05    | 0.00020988  |
| 208733_at   | -0.21762884 | -4.24746604 | 7.84E-05    | 0.000601072 |
| 208734_x_at | -0.33128505 | -4.23940763 | 8.06E-05    | 0.000614213 |
| 208735_s_at | 0.073997625 | 1.825470043 | 0.0730302   | 0.171080076 |
| 208736_at   | -0.29301954 | -2.65635356 | 0.010161446 | 0.035330275 |
| 208737_at   | 0.067886947 | 1.284861014 | 0.203899363 | 0.366913768 |
| 208738_x_at | 0.068828587 | 2.02858687  | 0.047055342 | 0.121637008 |
| 208739_x_at | -0.14540511 | -2.29160247 | 0.025542139 | 0.074982217 |
| 208740_at   | 0.317394949 | 3.52467285  | 0.000830224 | 0.004364859 |
| 208741_at   | 0.29509364  | 4.898820261 | 7.96E-06    | 8.84E-05    |
| 208742_s_at | -0.11755757 | -1.87130579 | 0.066300316 | 0.159058119 |
| 208743_s_at | -0.41618418 | -3.24766179 | 0.001928026 | 0.008835865 |
| 208744_x_at | -0.60329167 | -5.80311227 | 2.79E-07    | 5.64E-06    |
| 208745_at   | -0.45180656 | -7.73757283 | 1.59E-10    | 2.82E-08    |
| 208746_x_at | -0.33057753 | -4.04610035 | 0.000154553 | 0.001060052 |
| 208747_s_at | 0.625013822 | 5.061469981 | 4.41E-06    | 5.44E-05    |
| 208748_s_at | -0.04751065 | -1.31774863 | 0.192719328 | 0.352313666 |
| 208749_x_at | -0.0375319  | -0.84521446 | 0.401430934 | 0.583770398 |
| 208750_s_at | -0.35962778 | -3.57601565 | 0.000707306 | 0.003826063 |
| 208751_at   | -0.17036163 | -3.25002115 | 0.00191455  | 0.008789428 |
| 208752_x_at | -0.00376971 | -0.06976764 | 0.944616278 | 0.971451783 |
| 208753_s_at | 0.028602274 | 0.422449395 | 0.67424398  | 0.804198344 |
| 208754_s_at | 0.165899689 | 2.393017346 | 0.019935955 | 0.061429792 |

|             |             |             |             |             |
|-------------|-------------|-------------|-------------|-------------|
| 208755_x_at | 0.237709879 | 5.801007267 | 2.82E-07    | 5.68E-06    |
| 208756_at   | -0.10048787 | -2.14179648 | 0.036380155 | 0.09924929  |
| 208757_at   | 0.010994297 | 0.290026589 | 0.7728203   | 0.869931361 |
| 208758_at   | 0.053452417 | 1.081298573 | 0.283996727 | 0.461507589 |
| 208759_at   | 0.13851644  | 4.23756263  | 8.11E-05    | 0.000617556 |
| 208760_at   | -0.12448138 | -2.36058422 | 0.021595796 | 0.065550076 |
| 208761_s_at | -0.28929757 | -3.06330323 | 0.003305374 | 0.013940151 |
| 208762_at   | -0.03109196 | -1.0291322  | 0.307649129 | 0.488019269 |
| 208763_s_at | 0.235770974 | 3.474306488 | 0.000970368 | 0.00497165  |
| 208764_s_at | 0.124141333 | 2.055662585 | 0.044282067 | 0.116012318 |
| 208765_s_at | 0.098336388 | 2.337060177 | 0.022875799 | 0.068656585 |
| 208766_s_at | 0.043732205 | 0.591902499 | 0.556194014 | 0.718485999 |
| 208767_s_at | -0.0651991  | -0.53781859 | 0.592740224 | 0.7461755   |
| 208768_x_at | 0.065832753 | 1.418057723 | 0.161473028 | 0.310308765 |
| 208769_at   | 0.037649427 | 0.986510539 | 0.327940813 | 0.510442336 |
| 208770_s_at | 0.153435429 | 3.552533934 | 0.000761202 | 0.004069154 |
| 208771_s_at | -0.02011987 | -0.46433509 | 0.644129189 | 0.783843101 |
| 208772_at   | 0.246610525 | 4.531594547 | 2.94E-05    | 0.000263647 |
| 208773_s_at | 0.197457479 | 3.223345811 | 0.002072217 | 0.009387888 |
| 208774_at   | 0.097382846 | 1.744876902 | 0.086251752 | 0.194616211 |
| 208775_at   | 0.341949577 | 3.810090618 | 0.000335576 | 0.002044937 |
| 208776_at   | -0.07836126 | -1.19044697 | 0.238673747 | 0.408360481 |
| 208777_s_at | 0.074355069 | 1.369860828 | 0.175959515 | 0.330563163 |
| 208778_s_at | -0.08237809 | -1.50532348 | 0.137615483 | 0.276542769 |
| 208779_x_at | 0.540230506 | 6.620570663 | 1.22E-08    | 5.20E-07    |
| 208780_x_at | -0.0009709  | -0.01838534 | 0.985393941 | 0.993045305 |
| 208781_x_at | -0.20085085 | -2.98666336 | 0.004113415 | 0.016778016 |
| 208782_at   | 0.519021616 | 5.295429654 | 1.87E-06    | 2.68E-05    |
| 208783_s_at | 0.305815179 | 2.457146433 | 0.016986392 | 0.053917316 |
| 208784_s_at | -0.34007212 | -6.72158338 | 8.25E-09    | 3.88E-07    |
| 208785_s_at | -0.20345033 | -2.8867821  | 0.0054432   | 0.02113113  |
| 208786_s_at | 0.010099559 | 0.183579354 | 0.854977568 | 0.92068603  |
| 208787_at   | -0.36086667 | -3.84697347 | 0.000297731 | 0.00185091  |
| 208788_at   | 0.308588804 | 2.797413431 | 0.006959938 | 0.025923289 |
| 208789_at   | 0.462275953 | 6.017389563 | 1.24E-07    | 2.99E-06    |
| 208790_s_at | 0.235515148 | 4.609841754 | 2.23E-05    | 0.000209483 |
| 208791_at   | 0.392622328 | 4.903543897 | 7.83E-06    | 8.71E-05    |
| 208792_s_at | 0.507342212 | 5.684475865 | 4.37E-07    | 8.16E-06    |
| 208793_x_at | -0.22173014 | -3.85456553 | 0.000290467 | 0.001812051 |
| 208794_s_at | -0.07987003 | -1.01881889 | 0.312479284 | 0.493422046 |
| 208795_s_at | 0.411840336 | 6.179358777 | 6.67E-08    | 1.84E-06    |
| 208796_s_at | 0.152420366 | 2.124604928 | 0.037850912 | 0.102386693 |
| 208797_s_at | -0.01546147 | -0.42710528 | 0.670868785 | 0.801759378 |
| 208798_x_at | -0.46133337 | -4.30108631 | 6.53E-05    | 0.000514052 |
| 208799_at   | -0.17478929 | -2.86187777 | 0.005831815 | 0.022368306 |
| 208800_at   | -0.14462948 | -1.36572961 | 0.177246097 | 0.332304831 |
| 208801_at   | -0.10201377 | -1.20648758 | 0.23248051  | 0.400985101 |
| 208802_at   | -0.02211043 | -0.35178323 | 0.726263422 | 0.840173552 |
| 208803_s_at | -0.09264524 | -2.81138076 | 0.006699678 | 0.025100321 |
| 208804_s_at | 0.222369339 | 3.487196735 | 0.000932501 | 0.004809619 |
| 208805_at   | -0.14320121 | -1.73554086 | 0.08790428  | 0.197507319 |
| 208806_at   | -0.3692438  | -5.51389839 | 8.30E-07    | 1.37E-05    |
| 208807_s_at | -0.22558373 | -4.53560398 | 2.90E-05    | 0.000260494 |
| 208808_s_at | 0.601662799 | 3.963669582 | 0.000203138 | 0.001333328 |
| 208809_s_at | 0.513085846 | 6.154366804 | 7.33E-08    | 1.98E-06    |
| 208810_at   | 0.007520801 | 0.080847016 | 0.935839264 | 0.966652402 |
| 208811_s_at | -0.1132053  | -1.4270534  | 0.158874462 | 0.306753249 |
| 208812_x_at | 0.319888711 | 3.113552728 | 0.002858839 | 0.012332744 |
| 208813_at   | -0.71956361 | -5.99482461 | 1.35E-07    | 3.19E-06    |
| 208814_at   | 0.109800042 | 1.114824591 | 0.269479495 | 0.445168093 |
| 208815_x_at | 0.147861337 | 2.232730574 | 0.029403144 | 0.083764044 |
| 208816_x_at | 0.414914374 | 4.692047182 | 1.67E-05    | 0.000163747 |
| 208817_at   | 0.157933004 | 2.494019752 | 0.015474117 | 0.049905017 |
| 208818_s_at | 0.222749133 | 3.463549556 | 0.001003082 | 0.005108219 |
| 208819_at   | 0.285834481 | 5.336512976 | 1.61E-06    | 2.37E-05    |
| 208820_at   | 0.288588221 | 3.161848198 | 0.00248345  | 0.010931778 |
| 208821_at   | 0.034619716 | 0.437283216 | 0.663514229 | 0.796951757 |
| 208822_s_at | -0.0178295  | -0.30047502 | 0.764878898 | 0.864889501 |
| 208823_s_at | -0.18052993 | -5.32160476 | 1.70E-06    | 2.48E-05    |
| 208824_x_at | -0.19764439 | -5.13449249 | 3.38E-06    | 4.36E-05    |
| 208825_x_at | -0.08857698 | -2.619074   | 0.011207875 | 0.038262689 |
| 208826_x_at | -0.44101348 | -5.68166651 | 4.42E-07    | 8.20E-06    |
| 208827_at   | -0.21924869 | -3.51703398 | 0.000850165 | 0.00445017  |
| 208828_at   | -0.11882299 | -1.4785029  | 0.144631675 | 0.286666665 |
| 208829_at   | -0.04624586 | -0.77686265 | 0.440366321 | 0.620827469 |

|             |             |             |             |             |
|-------------|-------------|-------------|-------------|-------------|
| 208830_s_at | -0.02622848 | -0.76528644 | 0.447174062 | 0.626929328 |
| 208831_x_at | -0.03308425 | -0.97598354 | 0.333086822 | 0.515790845 |
| 208832_at   | -0.15161664 | -3.18226902 | 0.002339076 | 0.010393425 |
| 208833_s_at | -0.28302025 | -4.30727366 | 6.39E-05    | 0.00050486  |
| 208834_x_at | -0.07347025 | -2.30817026 | 0.024539971 | 0.072641434 |
| 208835_s_at | 0.361030959 | 4.535172075 | 2.90E-05    | 0.000260731 |
| 208836_at   | -0.06006656 | -0.89916375 | 0.372247578 | 0.555496916 |
| 208837_at   | 0.106431416 | 1.992209586 | 0.051016366 | 0.129502638 |
| 208838_at   | -0.14079721 | -2.52406866 | 0.014332796 | 0.046749476 |
| 208839_s_at | -0.17079301 | -2.30050836 | 0.024999005 | 0.073736228 |
| 208840_s_at | -0.53137555 | -3.93228081 | 0.000225262 | 0.001459888 |
| 208841_s_at | -0.46231246 | -4.20584404 | 9.03E-05    | 0.00067687  |
| 208842_s_at | -0.13710678 | -2.25092336 | 0.028158338 | 0.080919011 |
| 208843_s_at | -0.10350848 | -1.67043367 | 0.100170054 | 0.217861233 |
| 208844_at   | -0.0634833  | -1.02260796 | 0.310698783 | 0.4914266   |
| 208845_at   | -0.10831292 | -2.77614197 | 0.007374235 | 0.027178734 |
| 208846_s_at | -0.27110142 | -3.40824326 | 0.001188472 | 0.005886643 |
| 208847_s_at | 0.148969129 | 2.124698412 | 0.037842776 | 0.102377079 |
| 208848_at   | 0.052781931 | 0.670285998 | 0.505310045 | 0.677039109 |
| 208849_at   | 0.005834772 | 0.199323748 | 0.842699918 | 0.913604147 |
| 208850_s_at | -1.18864595 | -6.48303672 | 2.07E-08    | 7.58E-07    |
| 208851_s_at | -0.86985821 | -6.07456066 | 9.95E-08    | 2.51E-06    |
| 208852_s_at | 0.066110809 | 0.67622433  | 0.50156007  | 0.673832822 |
| 208853_s_at | -0.0422965  | -0.44294269 | 0.65943899  | 0.794066434 |
| 208854_s_at | -0.39421612 | -6.28510252 | 4.44E-08    | 1.34E-06    |
| 208855_s_at | -0.22771962 | -4.31048644 | 6.32E-05    | 0.000500303 |
| 208856_x_at | 0.139424428 | 2.432718443 | 0.018060213 | 0.056742631 |
| 208857_s_at | -0.722125   | -5.03653532 | 4.83E-06    | 5.86E-05    |
| 208858_s_at | 0.287644401 | 5.518256093 | 8.16E-07    | 1.36E-05    |
| 208859_s_at | 0.173928627 | 2.266613733 | 0.027122407 | 0.078543031 |
| 208860_s_at | -0.10630126 | -1.71173138 | 0.092237523 | 0.204778312 |
| 208861_s_at | -0.13616884 | -2.67462336 | 0.009681897 | 0.034001519 |
| 208862_s_at | 0.140680043 | 4.1049467   | 0.00012695  | 0.000902583 |
| 208863_s_at | 0.107811883 | 2.223105844 | 0.03008114  | 0.08531994  |
| 208864_s_at | -0.18099814 | -1.89258185 | 0.063359068 | 0.153471471 |
| 208865_at   | 0.220506831 | 3.592309713 | 0.000672066 | 0.003670087 |
| 208866_at   | 0.246304811 | 3.825288921 | 0.000319453 | 0.001962147 |
| 208867_s_at | -0.08716872 | -1.42967717 | 0.158122686 | 0.305645045 |
| 208868_s_at | -0.52009078 | -7.61041945 | 2.61E-10    | 3.88E-08    |
| 208869_s_at | -0.60457707 | -7.35508149 | 7.04E-10    | 7.36E-08    |
| 208870_x_at | -0.36623    | -4.92628939 | 7.21E-06    | 8.18E-05    |
| 208871_at   | 0.042475001 | 0.944222956 | 0.348934871 | 0.532039072 |
| 208872_s_at | -0.49723109 | -5.16158119 | 3.06E-06    | 4.02E-05    |
| 208873_s_at | -0.36474717 | -5.59923518 | 6.03E-07    | 1.05E-05    |
| 208874_x_at | -0.12773787 | -3.20565123 | 0.002183456 | 0.009817205 |
| 208875_s_at | 0.276893192 | 3.380678174 | 0.001292576 | 0.006320327 |
| 208876_s_at | 0.104006177 | 2.716314866 | 0.008664095 | 0.031051905 |
| 208877_at   | 0.496513488 | 6.195489279 | 6.27E-08    | 1.76E-06    |
| 208878_s_at | 0.246065976 | 3.484172405 | 0.000941258 | 0.004846392 |
| 208879_x_at | -0.05015812 | -1.05175284 | 0.297233274 | 0.476210053 |
| 208880_s_at | 0.1091783   | 2.39284323  | 0.019944552 | 0.061446581 |
| 208881_x_at | -0.0503654  | -0.64975031 | 0.518393958 | 0.687847004 |
| 208882_s_at | 0.139005549 | 2.535871719 | 0.013905725 | 0.045634824 |
| 208883_at   | -0.01307166 | -0.3509114  | 0.726913982 | 0.840518636 |
| 208884_s_at | 0.001785654 | 0.032310276 | 0.974334477 | 0.987055863 |
| 208885_at   | 0.076963051 | 1.615134444 | 0.111656672 | 0.236593493 |
| 208886_at   | 0.185646238 | 3.20554012  | 0.002184172 | 0.009818449 |
| 208887_at   | 0.180266367 | 3.934814871 | 0.000223393 | 0.001449668 |
| 208888_s_at | -0.01802452 | -0.31258181 | 0.755708715 | 0.859588429 |
| 208889_s_at | -0.07517572 | -1.2294993  | 0.223801284 | 0.390967712 |
| 208890_s_at | 0.574409541 | 7.021973622 | 2.57E-09    | 1.73E-07    |
| 208891_at   | -0.3796501  | -3.81247285 | 0.000332998 | 0.002032369 |
| 208892_s_at | -0.40772723 | -4.60969707 | 2.23E-05    | 0.000209507 |
| 208893_s_at | -0.17035585 | -3.60057907 | 0.000654829 | 0.003590871 |
| 208894_at   | 0.389151047 | 2.247709349 | 0.028374804 | 0.081446804 |
| 208895_s_at | 0.167524749 | 3.023475691 | 0.003704718 | 0.015368496 |
| 208896_at   | 0.020177747 | 0.226703863 | 0.821443452 | 0.900729937 |
| 208897_s_at | -0.00732928 | -0.17615035 | 0.860783511 | 0.92420438  |
| 208898_at   | -0.35736831 | -4.55545858 | 2.70E-05    | 0.000245998 |
| 208899_x_at | -0.48860034 | -5.69159074 | 4.26E-07    | 7.97E-06    |
| 208900_s_at | -0.04346919 | -1.33742976 | 0.186253433 | 0.344025394 |
| 208901_s_at | 0.057065803 | 1.270119671 | 0.209065015 | 0.373389881 |
| 208902_s_at | -0.05046054 | -1.46364138 | 0.14863878  | 0.292383995 |
| 208903_at   | 0.00361752  | 0.09313003  | 0.92611812  | 0.961287519 |
| 208904_s_at | 0.103935661 | 2.459513845 | 0.01688544  | 0.053661671 |



|             |             |             |             |             |
|-------------|-------------|-------------|-------------|-------------|
| 208905_at   | -0.46227322 | -5.90484448 | 1.90E-07    | 4.16E-06    |
| 208906_at   | -0.44372781 | -4.87361356 | 8.72E-06    | 9.52E-05    |
| 208907_s_at | 0.015782929 | 0.424004641 | 0.67311578  | 0.803367261 |
| 208908_s_at | 0.349080751 | 5.81677721  | 2.65E-07    | 5.41E-06    |
| 208909_at   | -0.47690612 | -4.63677664 | 2.03E-05    | 0.000193664 |
| 208910_s_at | -0.18692802 | -1.69260756 | 0.095844117 | 0.210727864 |
| 208911_s_at | -0.26135064 | -4.31482934 | 6.23E-05    | 0.000494307 |
| 208912_s_at | 0.158435729 | 1.538037634 | 0.129425071 | 0.264300774 |
| 208913_at   | -0.05890224 | -1.62169915 | 0.110239619 | 0.234343087 |
| 208914_at   | -0.14098684 | -3.93540523 | 0.000222959 | 0.001447487 |
| 208915_s_at | -0.04813962 | -0.98021508 | 0.331011887 | 0.513559094 |
| 208916_at   | 0.008827153 | 0.20245946  | 0.84025923  | 0.91209719  |
| 208917_x_at | -0.10457565 | -2.50095366 | 0.015203702 | 0.049177381 |
| 208918_s_at | -0.05081472 | -1.00089542 | 0.320994912 | 0.502853398 |
| 208919_s_at | -0.06213407 | -1.36221213 | 0.178347198 | 0.333900161 |
| 208920_at   | 0.171377213 | 1.808211307 | 0.075708681 | 0.175925356 |
| 208921_s_at | 0.113334326 | 1.203470655 | 0.23363632  | 0.402371814 |
| 208922_s_at | 0.037367408 | 0.83694705  | 0.406024556 | 0.588374224 |
| 208923_at   | 0.173809058 | 2.013652618 | 0.048648202 | 0.124806698 |
| 208924_at   | -0.17832506 | -2.61480462 | 0.011333781 | 0.03860742  |
| 208925_at   | 0.249297034 | 2.298747387 | 0.025105579 | 0.073972742 |
| 208926_at   | -0.14474457 | -3.65842522 | 0.00054552  | 0.003083004 |
| 208927_at   | 0.250377389 | 4.405063777 | 4.56E-05    | 0.000381454 |
| 208928_at   | 0.09715695  | 1.689451987 | 0.09645022  | 0.211812991 |
| 208929_x_at | 0.12228257  | 2.251479932 | 0.028121001 | 0.080832505 |
| 208930_s_at | 0.062899859 | 1.387890987 | 0.170427899 | 0.323044365 |
| 208931_s_at | 0.130372999 | 1.759549616 | 0.083706679 | 0.190034486 |
| 208932_at   | 0.118009681 | 2.948945145 | 0.004575396 | 0.018344777 |
| 208933_s_at | -0.37900468 | -4.95911631 | 6.40E-06    | 7.39E-05    |
| 208934_s_at | -0.44258841 | -6.45458067 | 2.31E-08    | 8.20E-07    |
| 208935_s_at | -0.13308212 | -3.09087183 | 0.003052903 | 0.013036532 |
| 208936_x_at | -0.36367709 | -7.55340683 | 3.26E-10    | 4.51E-08    |
| 208937_s_at | 0.679530427 | 4.34733537  | 5.57E-05    | 0.000451532 |
| 208938_at   | -0.04194423 | -0.84476018 | 0.401682512 | 0.584013625 |
| 208939_at   | 0.24732051  | 4.097643314 | 0.000130097 | 0.000921503 |
| 208940_at   | 0.300729201 | 5.301769927 | 1.83E-06    | 2.63E-05    |
| 208941_s_at | -0.00697856 | -0.16849138 | 0.866777273 | 0.927869789 |
| 208942_s_at | 0.267138005 | 3.571996284 | 0.000716266 | 0.003868443 |
| 208943_s_at | 0.176276795 | 2.532169133 | 0.014038439 | 0.045987387 |
| 208944_at   | 0.219019497 | 2.754143037 | 0.007826469 | 0.028561568 |
| 208945_s_at | -0.09190548 | -2.42249547 | 0.018527422 | 0.05788949  |
| 208946_s_at | -0.25329452 | -2.936399   | 0.004739451 | 0.018874016 |
| 208947_s_at | -0.01420148 | -0.45957782 | 0.64752074  | 0.786155385 |
| 208948_s_at | 0.078638565 | 1.375374216 | 0.174253629 | 0.328264339 |
| 208949_s_at | 0.566147074 | 5.584015685 | 6.38E-07    | 1.10E-05    |
| 208950_s_at | 0.273199242 | 2.384800847 | 0.020345285 | 0.062449965 |
| 208951_at   | 0.151315522 | 1.66123418  | 0.102011065 | 0.221014083 |
| 208952_s_at | -0.01384105 | -0.3785926  | 0.706359383 | 0.826901368 |
| 208953_at   | 0.008451846 | 0.129091211 | 0.897727788 | 0.945185882 |
| 208954_s_at | 0.063837901 | 1.520384969 | 0.133795078 | 0.27084396  |
| 208955_at   | -0.03355044 | -0.96465259 | 0.338685272 | 0.521391691 |
| 208956_x_at | 0.1310223   | 2.044830623 | 0.045374102 | 0.118221848 |
| 208957_at   | -0.00938414 | -0.3224578  | 0.74825422  | 0.854852568 |
| 208958_at   | 0.028374396 | 0.954772384 | 0.343617203 | 0.526499022 |
| 208959_s_at | 0.070395777 | 1.702557849 | 0.093953379 | 0.207643379 |
| 208960_s_at | 0.087943442 | 1.578716842 | 0.119787482 | 0.249175636 |
| 208961_s_at | 0.378887596 | 5.357983271 | 1.48E-06    | 2.21E-05    |
| 208962_s_at | 0.380835443 | 3.9913815   | 0.000185358 | 0.001236051 |
| 208963_x_at | 0.507849439 | 6.18258755  | 6.58E-08    | 1.82E-06    |
| 208964_s_at | 0.391243773 | 4.411282545 | 4.47E-05    | 0.000374381 |
| 208965_s_at | 0.279914907 | 3.168507028 | 0.002435478 | 0.010749198 |
| 208966_x_at | 0.439615577 | 3.181231217 | 0.002346219 | 0.010419041 |
| 208967_s_at | 0.117360561 | 2.99582147  | 0.00400799  | 0.016419937 |
| 208968_s_at | -0.03535063 | -0.72005198 | 0.474356954 | 0.650385354 |
| 208969_at   | -0.10167975 | -2.20205822 | 0.031612002 | 0.088800546 |
| 208970_s_at | -0.08518811 | -1.54640164 | 0.127394595 | 0.261206708 |
| 208971_at   | -0.1112942  | -2.62327825 | 0.011085137 | 0.037901991 |
| 208972_s_at | -0.27622768 | -5.00727504 | 5.38E-06    | 6.39E-05    |
| 208973_at   | -0.08569602 | -1.46691673 | 0.14774826  | 0.291106345 |
| 208974_x_at | 0.174362772 | 3.718166106 | 0.000451037 | 0.002625047 |
| 208975_s_at | -0.02099434 | -0.47146339 | 0.639061504 | 0.780588065 |
| 208977_x_at | -0.10475741 | -1.30285084 | 0.197725206 | 0.358706512 |
| 208978_at   | -0.02911432 | -0.34392    | 0.73213819  | 0.843665429 |
| 208979_at   | 0.153773668 | 3.588390678 | 0.000680386 | 0.00370827  |
| 208980_s_at | -0.02118516 | -0.27517556 | 0.78414986  | 0.876766294 |

|             |             |             |             |             |
|-------------|-------------|-------------|-------------|-------------|
| 208981_at   | 0.246734439 | 2.937395087 | 0.004726229 | 0.018834117 |
| 208982_at   | 0.448667401 | 4.429195348 | 4.20E-05    | 0.00035612  |
| 208983_s_at | 0.059915887 | 0.771196782 | 0.44369066  | 0.623874357 |
| 208984_x_at | 0.102821916 | 2.402238828 | 0.019485353 | 0.06034505  |
| 208985_s_at | 0.064178707 | 1.144137034 | 0.257221559 | 0.43096227  |
| 208986_at   | 0.53478089  | 5.933448577 | 1.70E-07    | 3.82E-06    |
| 208987_s_at | 0.066409852 | 1.514244989 | 0.135342224 | 0.273165997 |
| 208988_at   | 0.158790098 | 2.091475282 | 0.040832003 | 0.108706968 |
| 208989_s_at | 0.004355254 | 0.149992386 | 0.881285988 | 0.936545794 |
| 208990_s_at | 0.28790614  | 3.635306977 | 0.000586933 | 0.003279314 |
| 208991_at   | 0.321808697 | 3.782695919 | 0.000366629 | 0.002198793 |
| 208992_s_at | 0.126556087 | 2.112502567 | 0.038917153 | 0.104568353 |
| 208993_s_at | 0.25332862  | 3.049723733 | 0.003436783 | 0.014418315 |
| 208994_s_at | 0.045518331 | 0.976532208 | 0.332817299 | 0.515483304 |
| 208995_s_at | 0.076364249 | 1.943087053 | 0.05681719  | 0.140982325 |
| 208996_s_at | -0.08766423 | -1.64332659 | 0.10567395  | 0.226947629 |
| 208997_s_at | -0.09177989 | -1.52577083 | 0.132449537 | 0.268820831 |
| 208998_at   | 0.107566806 | 1.200141656 | 0.234916528 | 0.403834506 |
| 208999_at   | 0.39905284  | 6.776030869 | 6.68E-09    | 3.37E-07    |
| 209000_s_at | 0.320773094 | 3.024396863 | 0.003694994 | 0.015334448 |
| 209001_s_at | -0.03220392 | -0.77653358 | 0.440558991 | 0.620942395 |
| 209002_s_at | -0.15679924 | -4.57429461 | 2.53E-05    | 0.000233006 |
| 209003_at   | -0.06580104 | -1.04356943 | 0.300973135 | 0.480451099 |
| 209004_s_at | 0.116346773 | 1.262075547 | 0.211924535 | 0.376953407 |
| 209005_at   | 0.187777606 | 3.406266016 | 0.001195666 | 0.005917688 |
| 209006_s_at | -0.32768367 | -2.780712   | 0.007283358 | 0.026903698 |
| 209007_s_at | 0.065453983 | 1.155553519 | 0.252556419 | 0.425497516 |
| 209008_x_at | 0.157036003 | 4.157796694 | 0.000106269 | 0.000775157 |
| 209009_at   | 0.15239797  | 2.535507186 | 0.013918741 | 0.045658864 |
| 209010_s_at | -0.08234833 | -2.16027726 | 0.034855053 | 0.095949616 |
| 209011_at   | -0.1276658  | -3.54623518 | 0.000776311 | 0.004133114 |
| 209012_at   | 0.026897909 | 0.50926255  | 0.612481701 | 0.760996168 |
| 209013_x_at | -0.00243967 | -0.04723163 | 0.962489316 | 0.980948496 |
| 209014_at   | -0.24105444 | -3.31508148 | 0.001576082 | 0.007466425 |
| 209015_s_at | 0.29988803  | 2.601335544 | 0.011739477 | 0.039737991 |
| 209016_s_at | -0.00367959 | -0.13014438 | 0.896898177 | 0.94468844  |
| 209017_s_at | -0.01707801 | -0.36309192 | 0.717843456 | 0.8348129   |
| 209018_s_at | -0.31492225 | -5.75053161 | 3.41E-07    | 6.64E-06    |
| 209019_s_at | -0.19220856 | -4.42329806 | 4.28E-05    | 0.000361983 |
| 209020_at   | -0.03734193 | -0.74720279 | 0.457930651 | 0.636632863 |
| 209021_x_at | -0.04530329 | -1.33152841 | 0.188174724 | 0.346371695 |
| 209022_at   | 0.419133695 | 5.866890039 | 2.19E-07    | 4.63E-06    |
| 209023_s_at | 0.672115159 | 7.093728276 | 1.95E-09    | 1.43E-07    |
| 209024_s_at | 0.253299029 | 3.246037171 | 0.001937358 | 0.00887408  |
| 209025_s_at | -0.02294448 | -0.22112662 | 0.825762982 | 0.903382924 |
| 209026_x_at | -0.27069008 | -4.05320173 | 0.000150938 | 0.001039093 |
| 209027_s_at | -0.09597146 | -0.85086439 | 0.398310149 | 0.580632539 |
| 209028_s_at | -0.08032527 | -0.71280127 | 0.478799198 | 0.654289929 |
| 209029_at   | -0.05992236 | -1.32323342 | 0.190900616 | 0.34986182  |
| 209030_s_at | 0.206867443 | 2.919659025 | 0.004966855 | 0.019616356 |
| 209031_at   | 0.106636718 | 1.724591275 | 0.089875697 | 0.200685718 |
| 209032_s_at | 0.131006689 | 2.363480031 | 0.021442731 | 0.065187304 |
| 209033_s_at | 0.054879838 | 0.767171715 | 0.446061201 | 0.626032131 |
| 209034_at   | -0.01899409 | -0.41581741 | 0.679063335 | 0.807784599 |
| 209035_at   | 0.068646697 | 1.805749489 | 0.076097365 | 0.176532064 |
| 209036_s_at | -0.31995106 | -3.57724156 | 0.000704595 | 0.00381509  |
| 209037_s_at | 0.032490574 | 0.908760196 | 0.367201282 | 0.550389365 |
| 209038_s_at | 0.046230847 | 1.270108619 | 0.209068924 | 0.373389881 |
| 209039_x_at | 0.191629998 | 5.433789217 | 1.12E-06    | 1.75E-05    |
| 209040_s_at | 0.364918217 | 4.643663923 | 1.98E-05    | 0.000189574 |
| 209041_s_at | -0.03330681 | -0.86567367 | 0.390201539 | 0.573119732 |
| 209042_s_at | 0.01367175  | 0.256440176 | 0.798509646 | 0.885892313 |
| 209043_at   | -0.15263272 | -3.07400528 | 0.003205134 | 0.013584052 |
| 209044_x_at | 0.073772411 | 1.678275469 | 0.09862228  | 0.215279229 |
| 209045_at   | -0.01883199 | -0.43323828 | 0.666433158 | 0.79916046  |
| 209046_s_at | -0.17178072 | -2.39212543 | 0.019980029 | 0.061527421 |
| 209047_at   | 1.293854632 | 7.995634635 | 5.84E-11    | 1.57E-08    |
| 209048_s_at | 0.167923628 | 2.119704451 | 0.038279544 | 0.103283589 |
| 209049_s_at | 0.235978813 | 3.026619655 | 0.003671628 | 0.015244555 |
| 209050_s_at | 0.436079225 | 5.32977681  | 1.65E-06    | 2.42E-05    |
| 209051_s_at | 0.290384321 | 3.620261768 | 0.000615479 | 0.003410663 |
| 209052_s_at | 0.013174396 | 0.349720195 | 0.727803176 | 0.841142476 |
| 209053_s_at | 0.009445366 | 0.24158364  | 0.809946664 | 0.893311313 |
| 209054_s_at | 0.031363014 | 1.181068772 | 0.242349517 | 0.412911617 |
| 209055_s_at | -0.12707601 | -3.30956975 | 0.001602406 | 0.007571869 |

|             |             |             |             |             |
|-------------|-------------|-------------|-------------|-------------|
| 209056_s_at | 0.128557336 | 2.72015287  | 0.008575509 | 0.030800984 |
| 209057_x_at | -0.09051087 | -2.0321535  | 0.046681656 | 0.120923699 |
| 209058_at   | 0.080496117 | 1.471612977 | 0.14647872  | 0.289165906 |
| 209059_s_at | -0.09336972 | -1.20567215 | 0.232792498 | 0.401377193 |
| 209060_x_at | 0.06890925  | 2.073074085 | 0.042574382 | 0.112355138 |
| 209061_at   | 0.141480116 | 3.804418562 | 0.000341791 | 0.002074888 |
| 209062_x_at | 0.06429986  | 1.769906809 | 0.081947967 | 0.186963017 |
| 209063_x_at | 0.053753699 | 0.799541602 | 0.427207416 | 0.608458522 |
| 209064_x_at | -0.96443821 | -7.73632877 | 1.60E-10    | 2.82E-08    |
| 209065_at   | -0.28070061 | -4.51380501 | 3.13E-05    | 0.000277457 |
| 209066_x_at | -0.18870192 | -3.52922154 | 0.000818563 | 0.004311514 |
| 209067_s_at | -0.13780571 | -1.24291853 | 0.218850991 | 0.385605696 |
| 209068_at   | 0.021192779 | 0.455007005 | 0.650786449 | 0.788359525 |
| 209069_s_at | 0.353124195 | 3.83423973  | 0.000310308 | 0.001914983 |
| 209070_s_at | -0.34111904 | -2.8112184  | 0.006702651 | 0.025107274 |
| 209071_s_at | 0.135905842 | 1.610813791 | 0.112597344 | 0.23803039  |
| 209072_at   | 0.232062888 | 3.56704363  | 0.000727455 | 0.003921291 |
| 209073_s_at | -0.08919445 | -1.58814517 | 0.117638123 | 0.246021665 |
| 209074_s_at | 0.790343379 | 7.064558275 | 2.18E-09    | 1.55E-07    |
| 209075_s_at | -0.2939602  | -4.1662653  | 0.000103274 | 0.000757513 |
| 209076_s_at | 0.164568317 | 3.127733975 | 0.002743434 | 0.011913092 |
| 209077_at   | 0.055606066 | 1.642239707 | 0.105899667 | 0.227355908 |
| 209078_s_at | 0.011518037 | 0.390400009 | 0.697657177 | 0.821036828 |
| 209079_x_at | 0.008454811 | 0.159706094 | 0.873662126 | 0.932056424 |
| 209080_x_at | -0.31067678 | -5.77787841 | 3.07E-07    | 6.10E-06    |
| 209081_s_at | 0.160160443 | 3.087423479 | 0.003083466 | 0.013148196 |
| 209082_s_at | 0.242316599 | 5.098820489 | 3.85E-06    | 4.87E-05    |
| 209083_at   | -0.190462   | -2.71165485 | 0.008772782 | 0.031353311 |
| 209084_s_at | 0.153110242 | 3.14608237  | 0.002600589 | 0.011377925 |
| 209085_x_at | 0.069244047 | 1.544483933 | 0.127857885 | 0.261916147 |
| 209086_x_at | -0.05850598 | -1.1537856  | 0.253274864 | 0.426196778 |
| 209087_x_at | 0.107360002 | 1.140389328 | 0.258766284 | 0.432781332 |
| 209088_s_at | 0.091060242 | 1.705309648 | 0.093435936 | 0.206767721 |
| 209089_at   | 0.040743408 | 0.679009751 | 0.499806336 | 0.672527993 |
| 209090_s_at | 0.169322252 | 2.905684856 | 0.005164393 | 0.020240908 |
| 209091_s_at | 0.042266143 | 0.481804481 | 0.631740433 | 0.775268918 |
| 209092_s_at | -0.21933855 | -2.35014949 | 0.022155471 | 0.066912575 |
| 209093_s_at | -0.06846    | -1.90804571 | 0.06129137  | 0.149513339 |
| 209094_at   | 0.444946533 | 5.257340996 | 2.15E-06    | 3.01E-05    |
| 209095_at   | -0.34470112 | -4.1177481  | 0.00012161  | 0.000870432 |
| 209096_at   | -0.2581901  | -3.1950469  | 0.002252787 | 0.01008429  |
| 209097_s_at | -0.07331974 | -1.60851666 | 0.113100068 | 0.238754345 |
| 209098_s_at | 0.009010428 | 0.24985519  | 0.803573661 | 0.889427759 |
| 209099_x_at | 0.209687373 | 2.691441934 | 0.009258824 | 0.032809653 |
| 209100_at   | 0.092378738 | 3.437488092 | 0.001086734 | 0.005454049 |
| 209101_at   | 0.346178754 | 2.282767295 | 0.026091281 | 0.076308589 |
| 209102_s_at | 0.405881364 | 7.515012693 | 3.78E-10    | 4.86E-08    |
| 209103_s_at | -0.00336431 | -0.05962277 | 0.952659066 | 0.975747583 |
| 209104_s_at | -0.19400943 | -3.80431447 | 0.000341906 | 0.002075304 |
| 209105_at   | -0.09812101 | -1.30659637 | 0.196457558 | 0.357218812 |
| 209106_at   | -0.1465415  | -2.63735232 | 0.010683118 | 0.036775006 |
| 209107_x_at | -0.08352418 | -1.96700639 | 0.053925761 | 0.135358051 |
| 209108_at   | 0.605962479 | 4.585801214 | 2.43E-05    | 0.000224879 |
| 209109_s_at | 0.475656453 | 3.335003941 | 0.001484298 | 0.007102381 |
| 209110_s_at | 0.179807684 | 3.439972359 | 0.001078483 | 0.005424213 |
| 209111_at   | -0.15356978 | -2.51396143 | 0.0147079   | 0.047791585 |
| 209112_at   | 0.211625134 | 2.63789259  | 0.010667954 | 0.036728463 |
| 209113_s_at | 0.192410571 | 6.72372381  | 8.18E-09    | 3.87E-07    |
| 209114_at   | -0.05997931 | -1.67680671 | 0.098910675 | 0.215735908 |
| 209115_at   | -0.07414938 | -1.05423913 | 0.296103366 | 0.475049418 |
| 209116_x_at | -0.31266797 | -1.15499486 | 0.252783289 | 0.42573827  |
| 209117_at   | 0.002078626 | 0.035744345 | 0.971607764 | 0.985656434 |
| 209118_s_at | 0.103998449 | 1.587130274 | 0.117867985 | 0.246398615 |
| 209119_x_at | 0.103140231 | 1.877310005 | 0.065458817 | 0.157512812 |
| 209120_at   | 0.480487855 | 4.392041983 | 4.77E-05    | 0.000395917 |
| 209121_x_at | 0.32304063  | 4.699373124 | 1.63E-05    | 0.000160696 |
| 209122_at   | 0.20544965  | 3.086838333 | 0.00308868  | 0.013166662 |
| 209123_at   | 0.230087398 | 2.308111748 | 0.024543448 | 0.072646914 |
| 209124_at   | 0.096173818 | 1.682956908 | 0.097707655 | 0.21374207  |
| 209125_at   | -0.00811858 | -0.27897166 | 0.781249308 | 0.874989828 |
| 209126_x_at | 0.016486455 | 0.562568277 | 0.575876055 | 0.733238124 |
| 209127_s_at | 0.154817565 | 3.178718131 | 0.002363601 | 0.010488371 |
| 209128_s_at | 0.056972891 | 1.71524701  | 0.091586824 | 0.203682243 |
| 209129_at   | 0.480059717 | 6.24113026  | 5.26E-08    | 1.53E-06    |
| 209130_at   | 0.610788404 | 5.288217719 | 1.92E-06    | 2.74E-05    |

|             |             |             |             |             |
|-------------|-------------|-------------|-------------|-------------|
| 209131_s_at | 0.012099683 | 0.360282915 | 0.71993169  | 0.835957991 |
| 209132_s_at | 0.056270516 | 1.122553264 | 0.266208266 | 0.441412081 |
| 209133_s_at | 0.040655625 | 0.870905036 | 0.38736195  | 0.569966147 |
| 209134_s_at | 0.132490181 | 2.348646634 | 0.022237134 | 0.067104553 |
| 209135_at   | 0.333705301 | 3.297568806 | 0.001661165 | 0.007801682 |
| 209136_s_at | -0.10711116 | -2.74894594 | 0.007936963 | 0.028902368 |
| 209137_s_at | -0.11740018 | -3.52584901 | 0.000827194 | 0.004350311 |
| 209138_x_at | 0.088263067 | 1.662700048 | 0.101715877 | 0.220543992 |
| 209139_s_at | -0.07278621 | -0.95745794 | 0.342272013 | 0.525248799 |
| 209140_x_at | 0.256461729 | 2.308493476 | 0.024520772 | 0.072608649 |
| 209141_at   | -0.15595569 | -2.86647854 | 0.005758145 | 0.022143851 |
| 209142_s_at | -0.349093   | -3.52020804 | 0.000841824 | 0.004415823 |
| 209143_s_at | 0.205819632 | 3.331433981 | 0.001500364 | 0.007165451 |
| 209144_s_at | -0.05521379 | -1.62580055 | 0.109361716 | 0.232931127 |
| 209145_s_at | -0.00452037 | -0.14541232 | 0.884884647 | 0.9383907   |
| 209146_at   | 0.045082706 | 0.368096479 | 0.714128394 | 0.832290041 |
| 209147_s_at | 0.21819621  | 3.340580934 | 0.001459523 | 0.007004835 |
| 209148_at   | -0.00933195 | -0.28383    | 0.777541676 | 0.872520968 |
| 209149_s_at | 0.083201602 | 1.28384359  | 0.204252799 | 0.36728358  |
| 209150_s_at | 0.198851388 | 3.079165389 | 0.003157823 | 0.013406789 |
| 209151_x_at | 0.023225486 | 0.686914344 | 0.494847745 | 0.66831598  |
| 209152_s_at | -0.02579515 | -0.50813932 | 0.613264279 | 0.761587395 |
| 209153_s_at | 0.199968697 | 5.405838221 | 1.24E-06    | 1.90E-05    |
| 209154_at   | 0.815513524 | 5.950491774 | 1.60E-07    | 3.62E-06    |
| 209155_s_at | 0.338838902 | 4.314107325 | 6.24E-05    | 0.000495205 |
| 209156_s_at | 0.503815987 | 4.655687613 | 1.90E-05    | 0.000182777 |
| 209157_at   | -0.39462656 | -4.04675984 | 0.000154214 | 0.00105805  |
| 209158_s_at | -0.18532276 | -3.76211588 | 0.000391751 | 0.002330071 |
| 209159_s_at | -0.79405478 | -6.8424961  | 5.16E-09    | 2.83E-07    |
| 209160_at   | 0.539916493 | 4.578731499 | 2.49E-05    | 0.000230016 |
| 209161_at   | -0.01428948 | -0.39250526 | 0.696109819 | 0.820101227 |
| 209162_s_at | -0.10510052 | -2.05316691 | 0.044531634 | 0.116536349 |
| 209163_at   | -0.36025445 | -4.73598505 | 1.43E-05    | 0.000143593 |
| 209164_s_at | -0.14565405 | -3.04415942 | 0.003492025 | 0.014618357 |
| 209165_at   | 0.115476271 | 2.940555918 | 0.004684499 | 0.018694493 |
| 209166_s_at | 0.217050224 | 4.812509295 | 1.09E-05    | 0.00011429  |
| 209167_at   | 0.282505194 | 6.033660408 | 1.16E-07    | 2.84E-06    |
| 209168_at   | 0.18258951  | 2.4015891   | 0.019516801 | 0.060404768 |
| 209169_at   | 0.298793901 | 4.563203227 | 2.63E-05    | 0.000240495 |
| 209170_s_at | 0.307376026 | 5.87476149  | 2.13E-07    | 4.54E-06    |
| 209171_at   | -0.15675116 | -3.60144312 | 0.000653052 | 0.003583327 |
| 209172_s_at | 0.005995904 | 0.314415704 | 0.754322681 | 0.858753317 |
| 209173_at   | -0.00774426 | -0.28945184 | 0.773257855 | 0.870160898 |
| 209174_s_at | -0.0899018  | -2.61398885 | 0.011357985 | 0.038681023 |
| 209175_at   | -0.05135434 | -0.75896101 | 0.45091972  | 0.630297568 |
| 209176_at   | -0.04257729 | -1.4414436  | 0.15478525  | 0.300990402 |
| 209177_at   | -0.01402269 | -0.24818417 | 0.804860074 | 0.890061473 |
| 209178_at   | 0.083954734 | 2.684760487 | 0.009424829 | 0.03326772  |
| 209179_s_at | -0.15374622 | -3.33709683 | 0.001474954 | 0.007069026 |
| 209180_at   | -0.01810981 | -0.26202533 | 0.794221321 | 0.882914947 |
| 209181_s_at | 0.008338816 | 0.10995726  | 0.912819189 | 0.953812433 |
| 209182_s_at | 0.205379629 | 1.682698926 | 0.097757876 | 0.213803548 |
| 209183_s_at | 0.669781771 | 2.493040723 | 0.015512646 | 0.050006577 |
| 209184_s_at | 0.281649084 | 3.578640592 | 0.000701513 | 0.003802547 |
| 209185_s_at | 0.227613456 | 2.908229154 | 0.005127894 | 0.020118818 |
| 209186_at   | -0.45332228 | -4.98328011 | 5.87E-06    | 6.85E-05    |
| 209187_at   | 0.05459245  | 0.612339999 | 0.542683086 | 0.707421548 |
| 209188_x_at | -0.16260315 | -2.45244029 | 0.017188687 | 0.054455008 |
| 209189_at   | 0.366785872 | 1.695192462 | 0.095349959 | 0.209901246 |
| 209190_s_at | -0.16564803 | -4.27670196 | 7.10E-05    | 0.000551961 |
| 209191_at   | 0.250447634 | 2.410722375 | 0.019078893 | 0.059341213 |
| 209192_x_at | 0.08671881  | 2.725382585 | 0.008456137 | 0.030460359 |
| 209193_at   | 0.285024489 | 4.286712985 | 6.86E-05    | 0.00053572  |
| 209194_at   | 0.282995209 | 2.181153728 | 0.03319987  | 0.092366073 |
| 209195_s_at | 0.131733366 | 4.128908183 | 0.000117132 | 0.00084243  |
| 209196_at   | -0.0561869  | -1.35369663 | 0.181034474 | 0.337439743 |
| 209197_at   | -0.0674031  | -1.07416774 | 0.287153276 | 0.465351156 |
| 209198_s_at | -0.17200007 | -2.13236654 | 0.037180591 | 0.100919219 |
| 209199_s_at | -0.11346539 | -1.17833373 | 0.243429167 | 0.414245758 |
| 209200_at   | -0.11481624 | -1.06363386 | 0.291860525 | 0.470302166 |
| 209201_x_at | 0.222841464 | 2.902294945 | 0.005213398 | 0.02038801  |
| 209202_s_at | -0.08411941 | -1.95956823 | 0.054811103 | 0.137125942 |
| 209203_s_at | 0.102026783 | 2.088480881 | 0.041111245 | 0.109307142 |
| 209204_at   | 0.149935697 | 2.146408832 | 0.035994162 | 0.098412522 |
| 209205_s_at | -0.0116127  | -0.17560386 | 0.861210914 | 0.924350626 |

|             |             |             |             |             |
|-------------|-------------|-------------|-------------|-------------|
| 209206_at   | -0.06149367 | -1.0628638  | 0.292206714 | 0.470673024 |
| 209207_s_at | 0.017447731 | 0.583754514 | 0.561627084 | 0.72289147  |
| 209208_at   | -0.02173409 | -0.63351899 | 0.528861162 | 0.696416189 |
| 209209_s_at | 0.014169229 | 0.110417518 | 0.912455771 | 0.953727334 |
| 209210_s_at | 0.532435366 | 5.246805605 | 2.24E-06    | 3.11E-05    |
| 209211_at   | -0.12564976 | -2.51936314 | 0.014506339 | 0.047250005 |
| 209212_s_at | -0.28859904 | -4.30557043 | 6.43E-05    | 0.000507637 |
| 209213_at   | 0.123483212 | 1.261008129 | 0.212306148 | 0.377382847 |
| 209214_s_at | 0.13411742  | 2.133851239 | 0.037053555 | 0.100656303 |
| 209215_at   | 0.136886058 | 2.382338096 | 0.020469431 | 0.06274054  |
| 209216_at   | -0.00420428 | -0.08559608 | 0.932079467 | 0.964717359 |
| 209217_s_at | -0.03362381 | -0.978259   | 0.331969982 | 0.514456203 |
| 209218_at   | -0.08495542 | -0.81666155 | 0.417431429 | 0.599789269 |
| 209219_at   | 0.17131515  | 3.130822917 | 0.002718882 | 0.011826013 |
| 209220_at   | 0.031660074 | 0.762481056 | 0.448833051 | 0.628317631 |
| 209221_s_at | 0.081225048 | 2.425150808 | 0.018405036 | 0.057602093 |
| 209222_s_at | -0.02252056 | -0.51081287 | 0.611402305 | 0.760204535 |
| 209223_at   | -0.03874291 | -0.85188016 | 0.397750673 | 0.580053508 |
| 209224_s_at | -0.14280923 | -2.18497393 | 0.032904569 | 0.091715792 |
| 209225_x_at | 0.282616261 | 4.86425895  | 9.02E-06    | 9.80E-05    |
| 209226_s_at | 0.316480722 | 3.034783435 | 0.003586987 | 0.014937534 |
| 209227_at   | -0.71435113 | -7.83104988 | 1.11E-10    | 2.22E-08    |
| 209228_x_at | -0.80364594 | -5.50707648 | 8.51E-07    | 1.40E-05    |
| 209229_s_at | -0.19812726 | -4.85181967 | 9.43E-06    | 0.000101771 |
| 209230_s_at | 0.627116962 | 4.687088398 | 1.70E-05    | 0.000165853 |
| 209231_s_at | -0.08653861 | -2.03422653 | 0.046465639 | 0.120466237 |
| 209232_s_at | 0.052320249 | 1.790537374 | 0.078536328 | 0.180971672 |
| 209233_at   | 0.110490582 | 2.282538553 | 0.026105637 | 0.076335587 |
| 209234_at   | -0.10993703 | -2.01772029 | 0.048209814 | 0.123905517 |
| 209235_at   | 0.019540295 | 0.460719522 | 0.64670611  | 0.785704599 |
| 209236_at   | -0.11816403 | -2.42656849 | 0.018339992 | 0.057426676 |
| 209237_s_at | -0.07368762 | -1.57146998 | 0.12146089  | 0.251859607 |
| 209238_at   | -0.01067007 | -0.35743634 | 0.722050041 | 0.837466406 |
| 209239_at   | 0.066827902 | 1.593259224 | 0.11648533  | 0.244136296 |
| 209240_at   | -0.13935907 | -2.38001765 | 0.020587023 | 0.063023168 |
| 209241_x_at | -0.23489016 | -5.04631635 | 4.67E-06    | 5.70E-05    |
| 209242_at   | -0.66590631 | -5.76620121 | 3.21E-07    | 6.33E-06    |
| 209243_s_at | -0.96383076 | -5.7602461  | 3.29E-07    | 6.44E-06    |
| 209244_s_at | 0.299827377 | 4.514640664 | 3.12E-05    | 0.000276812 |
| 209245_s_at | 0.030504503 | 0.716008452 | 0.476831406 | 0.652556855 |
| 209246_at   | 0.06078211  | 1.146052908 | 0.256434417 | 0.430007765 |
| 209247_s_at | 0.01418715  | 0.347814906 | 0.729226194 | 0.842037358 |
| 209248_at   | -0.40877527 | -4.47723354 | 3.55E-05    | 0.000309997 |
| 209249_s_at | -0.6022554  | -5.58306845 | 6.40E-07    | 1.10E-05    |
| 209250_at   | 0.113534584 | 1.718656344 | 0.090959419 | 0.202559088 |
| 209251_x_at | -0.02781804 | -0.39617614 | 0.69341482  | 0.818177129 |
| 209252_at   | 0.128274381 | 2.844824086 | 0.006112557 | 0.023267388 |
| 209253_at   | 0.161135679 | 2.969951636 | 0.004312473 | 0.017464032 |
| 209254_at   | 0.007936928 | 0.224363633 | 0.823255275 | 0.901778449 |
| 209255_at   | -0.01009359 | -0.11763017 | 0.90676319  | 0.950444685 |
| 209256_s_at | 0.018806838 | 0.540919397 | 0.590614684 | 0.744626339 |
| 209257_s_at | 0.011315722 | 0.321901839 | 0.74867323  | 0.855068974 |
| 209258_s_at | 0.038588203 | 1.734752376 | 0.088045037 | 0.197707331 |
| 209259_s_at | 0.160858508 | 2.160078539 | 0.03487115  | 0.095974694 |
| 209260_at   | 0.019244949 | 0.492251503 | 0.6243818   | 0.769619709 |
| 209261_s_at | -0.08238239 | -2.17327276 | 0.033816426 | 0.093690639 |
| 209262_s_at | -0.01796619 | -0.34615181 | 0.730469103 | 0.842815412 |
| 209263_x_at | 0.217196014 | 4.576693878 | 2.51E-05    | 0.000231335 |
| 209264_s_at | 0.158700104 | 4.46199165  | 3.75E-05    | 0.000323983 |
| 209265_s_at | 0.071121543 | 1.113152252 | 0.270191035 | 0.445841756 |
| 209266_s_at | -0.14377704 | -1.91776766 | 0.060020998 | 0.147089868 |
| 209267_s_at | 0.179248698 | 2.53154928  | 0.014060769 | 0.04604366  |
| 209268_at   | -0.01484993 | -0.27146587 | 0.786987352 | 0.87841427  |
| 209269_s_at | 0.06277638  | 2.398428448 | 0.019670427 | 0.060770823 |
| 209270_at   | -0.05688986 | -1.60808471 | 0.1131948   | 0.238886623 |
| 209271_at   | 0.123033075 | 2.400703907 | 0.019559718 | 0.060508264 |
| 209272_at   | 0.542045407 | 6.83331605  | 5.35E-09    | 2.91E-07    |
| 209273_s_at | -0.36298773 | -5.14698773 | 3.23E-06    | 4.21E-05    |
| 209274_s_at | -0.37215101 | -4.02510929 | 0.000165737 | 0.001123821 |
| 209275_s_at | 0.063756428 | 2.08369369  | 0.04156112  | 0.110201696 |
| 209276_s_at | -0.0297715  | -0.21943834 | 0.827071621 | 0.904025422 |
| 209277_at   | 0.003978553 | 0.207808197 | 0.836099675 | 0.909548151 |
| 209278_s_at | 0.022463237 | 0.701740135 | 0.485620629 | 0.660419229 |
| 209279_s_at | -0.07242988 | -2.10033379 | 0.040015537 | 0.106877093 |
| 209280_at   | -0.0274453  | -0.49875166 | 0.619822499 | 0.766667001 |

|             |             |             |             |             |
|-------------|-------------|-------------|-------------|-------------|
| 209281_s_at | -1.21223091 | -8.47396422 | 9.18E-12    | 5.30E-09    |
| 209282_at   | 0.216460128 | 4.668531091 | 1.81E-05    | 0.000175665 |
| 209283_at   | 0.465733613 | 4.323704619 | 6.04E-05    | 0.000481874 |
| 209284_s_at | -0.03828352 | -0.99535295 | 0.323659395 | 0.505698004 |
| 209285_s_at | 0.507477241 | 6.859551177 | 4.83E-09    | 2.72E-07    |
| 209286_at   | -0.18984967 | -4.3315358  | 5.88E-05    | 0.000471281 |
| 209287_s_at | -0.05267142 | -1.55507721 | 0.125315425 | 0.25805635  |
| 209288_s_at | -0.0578677  | -1.30171863 | 0.1981096   | 0.359228881 |
| 209289_at   | 0.622653373 | 6.902681766 | 4.09E-09    | 2.40E-07    |
| 209290_s_at | 0.575916877 | 7.590920575 | 2.81E-10    | 4.06E-08    |
| 209291_at   | 0.594806175 | 4.791614381 | 1.17E-05    | 0.000121451 |
| 209292_at   | 0.998617114 | 5.599443853 | 6.02E-07    | 1.05E-05    |
| 209293_x_at | 0.372184984 | 3.320996806 | 0.001548285 | 0.007356174 |
| 209294_x_at | 0.036894028 | 1.045186113 | 0.300231765 | 0.479589608 |
| 209295_at   | 0.211626442 | 3.438648947 | 0.001082871 | 0.005440772 |
| 209296_at   | 0.054239913 | 0.720878877 | 0.473851822 | 0.649912096 |
| 209297_at   | 0.220913569 | 5.458233152 | 1.02E-06    | 1.63E-05    |
| 209298_s_at | 0.324042043 | 3.939554164 | 0.000219937 | 0.001429945 |
| 209299_x_at | 0.093094568 | 2.527837955 | 0.014195139 | 0.046388501 |
| 209300_s_at | -0.66637913 | -6.02474392 | 1.20E-07    | 2.92E-06    |
| 209301_at   | 0.05084153  | 0.345991215 | 0.730589165 | 0.842901902 |
| 209302_at   | 0.245512286 | 5.203595887 | 2.62E-06    | 3.54E-05    |
| 209303_at   | -0.34989814 | -3.70425934 | 0.000471521 | 0.00272616  |
| 209304_x_at | 0.155475804 | 1.039104675 | 0.303027052 | 0.482760667 |
| 209305_s_at | 0.141087117 | 0.952637555 | 0.344689004 | 0.527609102 |
| 209306_s_at | 0.378396349 | 4.054953058 | 0.000150059 | 0.001034143 |
| 209307_at   | 0.501634078 | 5.137852491 | 3.34E-06    | 4.32E-05    |
| 209308_s_at | 0.090240323 | 2.468827667 | 0.0164935   | 0.052591859 |
| 209309_at   | 0.626709426 | 4.511663152 | 3.15E-05    | 0.000278933 |
| 209310_s_at | 0.043374841 | 1.624482283 | 0.10964327  | 0.233363988 |
| 209311_at   | -0.07367486 | -1.48798539 | 0.142119612 | 0.283046265 |
| 209312_x_at | 0.423045304 | 2.673884954 | 0.00970087  | 0.034052097 |
| 209313_at   | 0.001759552 | 0.047772479 | 0.962060108 | 0.980756335 |
| 209314_s_at | -0.01244327 | -0.16953399 | 0.865960873 | 0.927595963 |
| 209315_at   | 0.069284045 | 0.899136938 | 0.372261741 | 0.555496916 |
| 209316_s_at | -0.09637052 | -1.13585211 | 0.260645238 | 0.434966489 |
| 209317_at   | 0.088821964 | 1.601360882 | 0.114677733 | 0.241332451 |
| 209318_x_at | -0.08940504 | -2.03329468 | 0.046562634 | 0.120657346 |
| 209320_at   | -0.19675883 | -4.02728162 | 0.000164544 | 0.00111692  |
| 209321_s_at | -0.48621388 | -5.92016014 | 1.79E-07    | 3.96E-06    |
| 209322_s_at | -0.00306579 | -0.08003801 | 0.936479899 | 0.967009996 |
| 209323_at   | 0.043882541 | 1.265629736 | 0.210657539 | 0.37544691  |
| 209324_s_at | -0.00313561 | -0.05599971 | 0.955532651 | 0.977177865 |
| 209325_s_at | 0.001248373 | 0.024472359 | 0.980559024 | 0.990272663 |
| 209326_at   | 0.007395956 | 0.178534191 | 0.858919626 | 0.923071128 |
| 209327_s_at | 0.018248234 | 0.487733286 | 0.627559668 | 0.772160878 |
| 209328_x_at | -0.02522003 | -1.35187506 | 0.181613301 | 0.338180144 |
| 209329_x_at | -0.0951737  | -2.5587384  | 0.013110976 | 0.043504028 |
| 209330_s_at | -0.06033787 | -0.51940202 | 0.605437895 | 0.755468788 |
| 209331_s_at | 0.156396722 | 2.860734515 | 0.005850257 | 0.022426152 |
| 209332_s_at | 0.378457295 | 6.481491589 | 2.09E-08    | 7.59E-07    |
| 209333_at   | -0.56392879 | -5.63543068 | 5.26E-07    | 9.45E-06    |
| 209334_s_at | 0.052173159 | 1.177467519 | 0.243771822 | 0.414670965 |
| 209335_at   | 0.167471114 | 2.953379489 | 0.004518685 | 0.018159253 |
| 209336_at   | -0.00214304 | -0.04569654 | 0.963707579 | 0.981363824 |
| 209337_at   | 0.103092085 | 1.456787107 | 0.15051596  | 0.294947134 |
| 209338_at   | -0.00066387 | -0.0180438  | 0.985665245 | 0.993135604 |
| 209339_at   | -0.14937632 | -3.27405307 | 0.001782247 | 0.008281574 |
| 209340_at   | 0.057401636 | 0.772094154 | 0.443163166 | 0.62339392  |
| 209341_s_at | 0.358403592 | 5.915780141 | 1.82E-07    | 4.02E-06    |
| 209342_s_at | 0.126585709 | 2.888708354 | 0.005414163 | 0.021028052 |
| 209343_at   | 0.620214376 | 6.931259168 | 3.66E-09    | 2.22E-07    |
| 209344_at   | -0.20495571 | -3.77156332 | 0.000380021 | 0.002269663 |
| 209345_s_at | -0.1258913  | -2.52734237 | 0.014213169 | 0.046435951 |
| 209346_s_at | -0.13023243 | -3.2978802  | 0.001659615 | 0.007798249 |
| 209347_s_at | -0.06454575 | -1.93324615 | 0.058044651 | 0.143267801 |
| 209348_s_at | 0.286333409 | 4.180205864 | 9.85E-05    | 0.000727646 |
| 209349_at   | -0.22295293 | -4.26538342 | 7.38E-05    | 0.000571031 |
| 209350_s_at | 0.142324774 | 3.900646115 | 0.000249896 | 0.001593205 |
| 209351_at   | -0.03362005 | -0.88669384 | 0.378870425 | 0.561477502 |
| 209352_s_at | -0.16037277 | -3.51317799 | 0.000860402 | 0.004494574 |
| 209353_s_at | -0.05943894 | -1.63197062 | 0.108051701 | 0.230882866 |
| 209354_at   | 0.134199801 | 3.995717593 | 0.000182715 | 0.001222076 |
| 209355_s_at | 0.463326813 | 4.346097359 | 5.59E-05    | 0.000453049 |
| 209356_x_at | 0.348182688 | 6.145914325 | 7.58E-08    | 2.03E-06    |

|             |             |             |             |             |
|-------------|-------------|-------------|-------------|-------------|
| 209357_at   | -0.04694275 | -0.88021181 | 0.382342271 | 0.565022813 |
| 209358_at   | 0.016114899 | 0.294935528 | 0.769086128 | 0.867760596 |
| 209359_x_at | -0.03162347 | -0.57603217 | 0.566800516 | 0.726789833 |
| 209360_s_at | 0.114304452 | 2.508859975 | 0.014900578 | 0.048319302 |
| 209361_s_at | 0.316564729 | 4.776250589 | 1.24E-05    | 0.000127099 |
| 209362_at   | -0.21159085 | -3.39241844 | 0.001247223 | 0.006132785 |
| 209363_s_at | -0.22275023 | -4.62246753 | 2.13E-05    | 0.000201933 |
| 209364_at   | 0.084896681 | 2.100196456 | 0.040028086 | 0.10690422  |
| 209365_s_at | 0.05812711  | 1.37948905  | 0.172988743 | 0.3265284   |
| 209366_x_at | 0.084593681 | 1.288892848 | 0.20250326  | 0.36504823  |
| 209367_at   | 0.029868085 | 0.640513445 | 0.524337104 | 0.692893964 |
| 209368_at   | 0.168656829 | 2.733056112 | 0.00828374  | 0.02993662  |
| 209369_at   | 0.2529484   | 3.562708922 | 0.000737385 | 0.003966204 |
| 209370_s_at | 0.203306233 | 4.971285159 | 6.13E-06    | 7.12E-05    |
| 209371_s_at | 0.058977851 | 1.440872195 | 0.154946045 | 0.301182744 |
| 209372_x_at | -0.29454997 | -2.72336726 | 0.008501957 | 0.030593353 |
| 209373_at   | 0.033665532 | 0.808010158 | 0.422354621 | 0.604294492 |
| 209374_s_at | 0.039839829 | 0.814204386 | 0.418826171 | 0.601176013 |
| 209375_at   | 0.182709566 | 4.946702013 | 6.70E-06    | 7.67E-05    |
| 209376_x_at | 0.238242792 | 3.823811314 | 0.000320987 | 0.001970004 |
| 209377_s_at | 0.197784197 | 3.099411622 | 0.002978431 | 0.012763644 |
| 209378_s_at | -0.13554894 | -3.33392389 | 0.001489141 | 0.007120221 |
| 209379_s_at | -0.20312877 | -3.5563506  | 0.000752183 | 0.004033667 |
| 209380_s_at | -0.28911571 | -4.61879265 | 2.16E-05    | 0.00020405  |
| 209381_x_at | 0.049505962 | 1.315607606 | 0.193432809 | 0.353357822 |
| 209382_at   | -0.11432138 | -2.40079185 | 0.01955545  | 0.06049925  |
| 209383_at   | -0.08999001 | -1.80027607 | 0.076967521 | 0.178161706 |
| 209384_at   | -0.06858127 | -1.43142243 | 0.15762416  | 0.304958396 |
| 209385_s_at | 0.035885658 | 0.734790147 | 0.465399402 | 0.643174807 |
| 209386_at   | 0.201188728 | 1.5001492   | 0.138947696 | 0.278443656 |
| 209387_s_at | 0.043567122 | 0.475099839 | 0.63648288  | 0.778432321 |
| 209388_at   | 0.082109774 | 1.357243194 | 0.179911544 | 0.335951652 |
| 209389_x_at | 0.465232117 | 4.826546501 | 1.03E-05    | 0.000109689 |
| 209390_at   | -0.04657789 | -1.05282449 | 0.296745895 | 0.475806764 |
| 209391_at   | -0.07668592 | -2.73349521 | 0.008273974 | 0.029907832 |
| 209392_at   | 0.110877138 | 0.742740065 | 0.460607922 | 0.638999439 |
| 209393_s_at | -0.00432112 | -0.14247599 | 0.887193065 | 0.939427879 |
| 209394_at   | -0.1017797  | -1.8447502  | 0.07013251  | 0.165930025 |
| 209395_at   | 1.06691808  | 3.181601201 | 0.00234367  | 0.010410826 |
| 209396_s_at | 0.985751198 | 3.036357469 | 0.003570878 | 0.014882933 |
| 209397_at   | -0.11944491 | -2.58498707 | 0.012249629 | 0.041159343 |
| 209398_at   | 0.403887044 | 4.921860086 | 7.33E-06    | 8.28E-05    |
| 209399_at   | 0.029367694 | 0.799393309 | 0.427292688 | 0.608539079 |
| 209400_at   | 0.030449433 | 0.878491357 | 0.383267117 | 0.565872944 |
| 209401_s_at | 0.034191034 | 1.030532238 | 0.306997363 | 0.48717559  |
| 209402_s_at | 0.148673655 | 4.486221167 | 3.44E-05    | 0.000301614 |
| 209403_at   | -0.01227152 | -0.24718148 | 0.805632241 | 0.890595639 |
| 209404_s_at | 0.075966154 | 1.631960095 | 0.108053925 | 0.230882866 |
| 209405_s_at | 0.056408568 | 1.078977573 | 0.285021489 | 0.462724465 |
| 209406_at   | 0.081055832 | 2.040506308 | 0.045816521 | 0.1192286   |
| 209407_s_at | -0.46032591 | -6.24429326 | 5.20E-08    | 1.51E-06    |
| 209408_at   | 0.049184687 | 1.413268862 | 0.162869743 | 0.312295115 |
| 209409_at   | -0.37988869 | -4.75070889 | 1.35E-05    | 0.000137336 |
| 209410_s_at | -0.07172343 | -2.01410325 | 0.048599467 | 0.124708314 |
| 209411_s_at | 0.011465654 | 0.333088436 | 0.74025702  | 0.849294701 |
| 209412_at   | -0.1284326  | -2.12333594 | 0.037961503 | 0.102586497 |
| 209413_at   | -0.05410677 | -1.10882949 | 0.272036385 | 0.447918437 |
| 209414_at   | -0.09283917 | -2.47435598 | 0.016264754 | 0.051996023 |
| 209415_at   | 0.009070817 | 0.209129435 | 0.835072906 | 0.908984323 |
| 209416_s_at | 0.037308448 | 1.155665772 | 0.252510851 | 0.425471836 |
| 209417_s_at | 0.291536792 | 4.290425968 | 6.77E-05    | 0.000529977 |
| 209418_s_at | 0.048840975 | 1.615102833 | 0.111663531 | 0.236593493 |
| 209419_at   | 0.014927033 | 0.807549286 | 0.422617862 | 0.604539817 |
| 209420_s_at | 0.177209384 | 4.389646028 | 4.81E-05    | 0.000398543 |
| 209421_at   | -0.46587953 | -4.90083383 | 7.90E-06    | 8.78E-05    |
| 209422_at   | 0.183059534 | 2.074312362 | 0.042455139 | 0.112133153 |
| 209423_s_at | -0.11320462 | -3.06366116 | 0.003301975 | 0.013931073 |
| 209424_s_at | -0.02695315 | -0.8279712  | 0.411048096 | 0.593269607 |
| 209425_at   | 0.004700893 | 0.111795252 | 0.91136803  | 0.953080775 |
| 209426_s_at | -0.06546051 | -1.63299899 | 0.107834603 | 0.230524446 |
| 209427_at   | 0.191779439 | 3.709861175 | 0.000463165 | 0.002684794 |
| 209428_s_at | 0.068071482 | 2.281373482 | 0.026178862 | 0.076494652 |
| 209429_x_at | 0.123532235 | 3.750344365 | 0.000406854 | 0.002406766 |
| 209430_at   | 0.070819843 | 1.11991657  | 0.267321105 | 0.44261688  |
| 209431_s_at | 0.239852104 | 4.527950616 | 2.98E-05    | 0.000266657 |

|             |             |             |             |             |
|-------------|-------------|-------------|-------------|-------------|
| 209432_s_at | -0.02241221 | -0.79917257 | 0.427419638 | 0.608658246 |
| 209433_s_at | 0.291452487 | 3.046976651 | 0.003463953 | 0.014522607 |
| 209434_s_at | 0.040123382 | 1.217679333 | 0.228229227 | 0.395687044 |
| 209435_s_at | -0.18560599 | -3.48273448 | 0.000945448 | 0.004864356 |
| 209436_at   | 0.110713371 | 1.48066001  | 0.144057177 | 0.285848267 |
| 209437_s_at | -0.05489338 | -0.77539771 | 0.441224438 | 0.621527487 |
| 209438_at   | -0.06071524 | -1.08909643 | 0.280572585 | 0.457724035 |
| 209439_s_at | 0.020609412 | 0.748443189 | 0.457188103 | 0.636055618 |
| 209440_at   | -0.12499917 | -1.7578646  | 0.083995749 | 0.190593929 |
| 209441_at   | -0.47993341 | -6.7782038  | 6.62E-09    | 3.37E-07    |
| 209442_x_at | -0.13577582 | -1.71934648 | 0.090832847 | 0.202307466 |
| 209443_at   | 0.296108622 | 3.979228192 | 0.000192963 | 0.001277802 |
| 209444_at   | -0.3958394  | -4.44528168 | 3.97E-05    | 0.000340267 |
| 209445_x_at | -0.15937177 | -3.4584047  | 0.001019096 | 0.005179147 |
| 209446_s_at | 0.058986659 | 1.422623966 | 0.160149901 | 0.308522753 |
| 209447_at   | -0.09080198 | -1.60679883 | 0.113477195 | 0.239335667 |
| 209448_at   | 0.236775569 | 2.929618659 | 0.004830368 | 0.01917389  |
| 209449_at   | 0.105256141 | 2.258108291 | 0.0276797   | 0.07978466  |
| 209450_at   | 0.035554882 | 1.05224293  | 0.297010318 | 0.476008934 |
| 209451_at   | 0.020750218 | 0.231836965 | 0.817472801 | 0.898006451 |
| 209452_s_at | -0.23579705 | -4.65516054 | 1.90E-05    | 0.000183039 |
| 209453_at   | -0.27641485 | -5.58273348 | 6.41E-07    | 1.10E-05    |
| 209454_s_at | 0.046728739 | 1.331407556 | 0.188214226 | 0.346401605 |
| 209455_at   | -0.07605716 | -1.47352029 | 0.145965565 | 0.288484881 |
| 209456_s_at | -0.28205446 | -4.38152687 | 4.95E-05    | 0.000408291 |
| 209457_at   | -0.25199345 | -2.94343563 | 0.004646778 | 0.018570493 |
| 209458_x_at | -0.00027115 | -0.00111425 | 0.999114744 | 0.999548259 |
| 209459_s_at | -0.13316876 | -1.64376562 | 0.105582886 | 0.226785964 |
| 209460_at   | -0.22838707 | -3.17857539 | 0.002364592 | 0.010491248 |
| 209461_x_at | -0.02316535 | -0.46310885 | 0.645002681 | 0.784495709 |
| 209462_at   | -0.24455378 | -3.00369677 | 0.00391935  | 0.016123306 |
| 209463_s_at | 0.054035426 | 1.62318813  | 0.109920246 | 0.233797622 |
| 209464_at   | -0.02313525 | -0.56993228 | 0.570903521 | 0.729351965 |
| 209465_x_at | -0.15791319 | -2.08870302 | 0.041090473 | 0.109271415 |
| 209466_x_at | -0.20204187 | -2.36705284 | 0.021255218 | 0.064727324 |
| 209467_s_at | 0.062691991 | 1.352042663 | 0.181559983 | 0.338123124 |
| 209468_at   | 0.045829984 | 0.927142602 | 0.357657646 | 0.540666766 |
| 209469_at   | -0.21064081 | -2.65325239 | 0.010244967 | 0.035548764 |
| 209470_s_at | -0.08775795 | -1.05161588 | 0.297295602 | 0.476278275 |
| 209471_s_at | 0.081785058 | 0.674526865 | 0.502630451 | 0.674804293 |
| 209472_at   | -0.13761385 | -1.61300171 | 0.112120204 | 0.237234928 |
| 209473_at   | 0.157079653 | 3.593500854 | 0.000669557 | 0.003657921 |
| 209474_s_at | -0.01807639 | -0.39808595 | 0.692014298 | 0.817093913 |
| 209475_at   | -0.10601782 | -2.3484367  | 0.022248564 | 0.067128075 |
| 209476_at   | 0.466241477 | 4.681476007 | 1.73E-05    | 0.000169003 |
| 209477_at   | 0.039437608 | 0.825919014 | 0.412201946 | 0.59447318  |
| 209478_at   | 0.035781289 | 1.060606414 | 0.293223178 | 0.471800485 |
| 209479_at   | 0.036325044 | 0.626154263 | 0.533646645 | 0.700464523 |
| 209480_at   | 0.054778352 | 1.246952527 | 0.217378756 | 0.383616638 |
| 209481_at   | -0.02272805 | -0.39254354 | 0.69608169  | 0.820089706 |
| 209482_at   | -0.19898769 | -2.89552605 | 0.005312542 | 0.020719795 |
| 209483_s_at | -0.00787774 | -0.39807622 | 0.692021429 | 0.817093913 |
| 209484_s_at | 0.309375722 | 5.020120583 | 5.13E-06    | 6.15E-05    |
| 209485_s_at | 0.434623435 | 4.151036716 | 0.00010872  | 0.000790326 |
| 209486_at   | 0.013410252 | 0.194279264 | 0.846629546 | 0.915710134 |
| 209487_at   | 0.306437502 | 6.173884626 | 6.81E-08    | 1.87E-06    |
| 209488_s_at | 0.260511223 | 3.508933616 | 0.000871807 | 0.004544826 |
| 209489_at   | -0.30099559 | -6.40745437 | 2.77E-08    | 9.37E-07    |
| 209490_s_at | -0.05235206 | -1.3828128  | 0.171972184 | 0.325145141 |
| 209491_s_at | -0.01147898 | -0.30007104 | 0.765185478 | 0.865084854 |
| 209492_x_at | 0.084210864 | 1.3920523   | 0.169170401 | 0.321261305 |
| 209493_at   | -0.8012545  | -6.67887956 | 9.73E-09    | 4.37E-07    |
| 209494_s_at | 0.093286048 | 2.325398061 | 0.023535088 | 0.070300103 |
| 209495_at   | 0.060806497 | 2.025558682 | 0.047374636 | 0.122265245 |
| 209496_at   | 0.504554808 | 5.038048312 | 4.81E-06    | 5.83E-05    |
| 209497_s_at | 0.20083294  | 4.473998841 | 3.59E-05    | 0.000312716 |
| 209498_at   | -0.04220426 | -0.95817061 | 0.341915619 | 0.524900139 |
| 209499_x_at | 0.071721312 | 0.959167255 | 0.34141762  | 0.524333743 |
| 209500_x_at | 0.122999673 | 2.003658068 | 0.049739957 | 0.126954777 |
| 209501_at   | -0.75165912 | -7.48027267 | 4.33E-10    | 5.31E-08    |
| 209502_s_at | 0.041171731 | 1.071617335 | 0.288288117 | 0.46641227  |
| 209503_s_at | 0.01762908  | 0.359848544 | 0.720254797 | 0.836224538 |
| 209504_s_at | 0.424566143 | 6.347798    | 3.49E-08    | 1.12E-06    |
| 209505_at   | 0.812808483 | 6.62292208  | 1.21E-08    | 5.17E-07    |
| 209506_s_at | 0.581121158 | 6.421199505 | 2.63E-08    | 8.99E-07    |



|             |             |             |             |             |
|-------------|-------------|-------------|-------------|-------------|
| 209507_at   | -0.32975883 | -5.18598124 | 2.80E-06    | 3.73E-05    |
| 209508_x_at | 0.168576599 | 3.674649006 | 0.000518141 | 0.002951408 |
| 209509_s_at | 0.041385304 | 1.046044759 | 0.29983852  | 0.479184092 |
| 209510_at   | 0.085893613 | 1.4960533   | 0.140009467 | 0.280069066 |
| 209511_at   | 0.098499267 | 2.167501723 | 0.034274261 | 0.094694935 |
| 209512_at   | 0.231505318 | 2.111867802 | 0.038973793 | 0.104689069 |
| 209513_s_at | 0.48881965  | 5.468316726 | 9.84E-07    | 1.58E-05    |
| 209514_s_at | 0.002047883 | 0.054633975 | 0.956616019 | 0.977772055 |
| 209515_s_at | 0.194998472 | 3.633701281 | 0.000589919 | 0.003293111 |
| 209516_at   | -0.12637103 | -3.4865006  | 0.00093451  | 0.004817199 |
| 209517_s_at | -0.09276485 | -2.80998986 | 0.006725187 | 0.025179029 |
| 209518_at   | -0.05773829 | -1.51652972 | 0.134764872 | 0.27230815  |
| 209519_at   | -0.01371856 | -0.78674795 | 0.434601521 | 0.615281652 |
| 209520_s_at | -0.00912999 | -0.18290652 | 0.855503074 | 0.920860872 |
| 209521_s_at | 0.122032016 | 3.474432043 | 0.000969993 | 0.004970294 |
| 209522_s_at | 0.200174296 | 4.723948942 | 1.49E-05    | 0.000148943 |
| 209523_at   | -0.05746313 | -1.36387559 | 0.177825825 | 0.333140166 |
| 209524_at   | -0.11477497 | -1.80706038 | 0.075890189 | 0.176228011 |
| 209525_at   | -0.02630072 | -1.02381462 | 0.310133211 | 0.490740456 |
| 209526_s_at | -0.3352399  | -5.44523885 | 1.07E-06    | 1.69E-05    |
| 209527_at   | -0.00464881 | -0.13354681 | 0.894218784 | 0.943542916 |
| 209528_s_at | 0.156616653 | 3.666767722 | 0.000531273 | 0.003015575 |
| 209529_at   | 0.306753096 | 2.830827421 | 0.006352245 | 0.024020183 |
| 209530_at   | -0.40093124 | -6.91616744 | 3.88E-09    | 2.32E-07    |
| 209531_at   | 0.056813562 | 1.204576688 | 0.233212105 | 0.401876086 |
| 209532_at   | -0.03504664 | -1.47826251 | 0.14469581  | 0.286726752 |
| 209533_s_at | 0.004831869 | 0.164600843 | 0.869824961 | 0.929703843 |
| 209534_x_at | 0.056936083 | 1.30714789  | 0.196271418 | 0.357039499 |
| 209535_s_at | 0.060014677 | 1.448608016 | 0.152780169 | 0.29814214  |
| 209536_s_at | 0.015787066 | 0.349006211 | 0.728336322 | 0.841475762 |
| 209537_at   | -0.56882718 | -7.30027195 | 8.72E-10    | 8.60E-08    |
| 209538_at   | 0.065930197 | 1.269613207 | 0.209244203 | 0.373643196 |
| 209539_at   | 0.483623927 | 6.009552974 | 1.28E-07    | 3.06E-06    |
| 209540_at   | -0.02306993 | -0.60912639 | 0.54479639  | 0.709111145 |
| 209541_at   | -0.1219105  | -2.35992459 | 0.021630799 | 0.065629576 |
| 209542_x_at | 0.010092341 | 0.251917843 | 0.801986509 | 0.888271568 |
| 209543_s_at | 0.124163004 | 1.908831005 | 0.061187913 | 0.14931802  |
| 209544_at   | 0.021197015 | 0.859742955 | 0.393436389 | 0.576261236 |
| 209545_s_at | 0.080311741 | 1.86201803  | 0.067620003 | 0.161496959 |
| 209546_s_at | 0.06194255  | 1.196632286 | 0.236271609 | 0.405462149 |
| 209547_s_at | 0.083817396 | 3.50875268  | 0.000872296 | 0.004546455 |
| 209549_s_at | -0.19685726 | -4.6195383  | 2.16E-05    | 0.000203643 |
| 209550_at   | -0.33794187 | -3.34182721 | 0.001454041 | 0.006983021 |
| 209551_at   | 0.015427124 | 0.648321538 | 0.519310913 | 0.688634345 |
| 209552_at   | -0.00407103 | -0.10022142 | 0.920510835 | 0.958253247 |
| 209553_at   | 0.084721042 | 2.335348177 | 0.022971541 | 0.068897895 |
| 209554_at   | -0.00811738 | -0.43126915 | 0.667856018 | 0.799870569 |
| 209555_s_at | 0.265643374 | 2.682797053 | 0.009474126 | 0.033400462 |
| 209556_at   | -1.16323026 | -6.16899126 | 6.94E-08    | 1.90E-06    |
| 209557_s_at | -1.09439394 | -6.93901454 | 3.55E-09    | 2.17E-07    |
| 209558_s_at | 0.420538387 | 7.088238262 | 1.99E-09    | 1.45E-07    |
| 209559_at   | 0.082415347 | 1.892164829 | 0.063415638 | 0.153572024 |
| 209560_s_at | -0.10177694 | -1.98764038 | 0.051533595 | 0.130578264 |
| 209561_at   | -0.11227382 | -2.52675042 | 0.014234733 | 0.046494544 |
| 209563_x_at | -0.15209982 | -4.15271651 | 0.000108106 | 0.000786886 |
| 209565_at   | -0.24554249 | -5.38368596 | 1.35E-06    | 2.04E-05    |
| 209566_at   | -0.1707915  | -3.1015279  | 0.002960241 | 0.012699787 |
| 209567_at   | -0.0795301  | -1.77402489 | 0.081257286 | 0.185899699 |
| 209568_s_at | 0.170323852 | 2.865743272 | 0.005769861 | 0.022176351 |
| 209569_x_at | -0.92521603 | -6.27006803 | 4.71E-08    | 1.40E-06    |
| 209570_s_at | -0.92028323 | -6.45450093 | 2.31E-08    | 8.20E-07    |
| 209571_at   | 0.008350144 | 0.215844204 | 0.829859175 | 0.905605272 |
| 209572_s_at | 0.218628444 | 2.882777696 | 0.005504024 | 0.021319625 |
| 209573_s_at | -0.10552201 | -2.31587817 | 0.024085753 | 0.071586119 |
| 209574_s_at | -0.0470675  | -0.36510288 | 0.71634982  | 0.833857013 |
| 209575_at   | 0.127341854 | 2.930555976 | 0.004817704 | 0.019132116 |
| 209576_at   | 0.181530438 | 1.228518518 | 0.224166285 | 0.391293987 |
| 209577_at   | 0.086155103 | 1.984419193 | 0.051900929 | 0.131278303 |
| 209578_s_at | 0.198960674 | 4.611670511 | 2.22E-05    | 0.000208414 |
| 209579_s_at | 0.217672466 | 3.635222895 | 0.000587089 | 0.003279775 |
| 209580_s_at | -0.05459723 | -0.78888119 | 0.433363371 | 0.614190264 |
| 209581_at   | 0.401718419 | 4.21746594  | 8.68E-05    | 0.00065417  |
| 209582_s_at | -0.4635279  | -5.08512567 | 4.05E-06    | 5.06E-05    |
| 209583_s_at | -0.57419043 | -5.87492951 | 2.13E-07    | 4.54E-06    |
| 209584_x_at | 0.102508645 | 2.40982157  | 0.019121688 | 0.059437091 |

|             |              |             |             |             |
|-------------|--------------|-------------|-------------|-------------|
| 209585_s_at | -0.03604354  | -0.6720547  | 0.504191553 | 0.676148619 |
| 209586_s_at | 0.179871653  | 4.459832843 | 3.77E-05    | 0.000326362 |
| 209587_at   | 0.000735644  | 0.018689685 | 0.985152185 | 0.992908143 |
| 209588_at   | 0.044278945  | 0.89282484  | 0.375604967 | 0.558520731 |
| 209589_s_at | 0.011190957  | -0.28553516 | 0.776241613 | 0.871915909 |
| 209590_at   | -0.427185107 | 6.061340327 | 1.05E-07    | 2.61E-06    |
| 209591_s_at | 0.152755098  | 2.755771462 | 0.007792139 | 0.02845847  |
| 209592_s_at | -0.07253386  | -1.73924745 | 0.087245085 | 0.196351965 |
| 209593_s_at | 0.04378118   | 1.27893943  | 0.205962837 | 0.369360577 |
| 209594_x_at | -0.03434545  | -0.562414   | 0.575980451 | 0.733283224 |
| 209595_at   | 0.004890238  | 0.181441269 | 0.856647722 | 0.921624843 |
| 209596_at   | -0.00103367  | -0.02352333 | 0.981312794 | 0.990588176 |
| 209597_s_at | -0.4275118   | -5.85810621 | 2.27E-07    | 4.76E-06    |
| 209598_at   | -0.66005883  | -5.62572054 | 5.46E-07    | 9.71E-06    |
| 209599_s_at | -0.00884368  | -0.37089769 | 0.71205198  | 0.830858923 |
| 209600_s_at | 0.28657746   | 3.637200796 | 0.000583431 | 0.003264234 |
| 209601_at   | -0.02008538  | -0.63835575 | 0.525730541 | 0.694119626 |
| 209602_s_at | -0.05064533  | -2.38111114 | 0.020531534 | 0.062888992 |
| 209603_at   | -0.01699746  | -0.62402397 | 0.535035047 | 0.701472258 |
| 209604_s_at | 0.045294178  | 1.883180094 | 0.064644867 | 0.155940433 |
| 209605_at   | 0.61435539   | 7.20979686  | 1.24E-09    | 1.08E-07    |
| 209606_at   | 0.021346013  | 0.664948509 | 0.508693479 | 0.679803515 |
| 209607_x_at | 0.029306963  | 0.57306093  | 0.568797266 | 0.72790675  |
| 209608_s_at | -0.00440306  | -0.10087246 | 0.919996245 | 0.957934676 |
| 209609_s_at | -0.02363193  | -0.41380039 | 0.680531757 | 0.808655056 |
| 209610_s_at | -0.20377883  | -2.1304897  | 0.037341725 | 0.101248339 |
| 209611_s_at | -0.24336565  | -4.7683704  | 1.27E-05    | 0.000130159 |
| 209612_s_at | 0.130687733  | 2.735461638 | 0.008230364 | 0.029780705 |
| 209613_s_at | 0.09236119   | 3.100164562 | 0.002971947 | 0.012738301 |
| 209614_at   | 0.133506419  | 4.424451691 | 4.27E-05    | 0.000361204 |
| 209615_s_at | -0.17691053  | -5.02190952 | 5.10E-06    | 6.12E-05    |
| 209616_s_at | 0.05824407   | 1.200565807 | 0.234753133 | 0.403600193 |
| 209617_s_at | 0.361818949  | 5.304270557 | 1.81E-06    | 2.61E-05    |
| 209618_at   | 0.379624413  | 4.879755137 | 8.53E-06    | 9.35E-05    |
| 209619_at   | 0.330900906  | 2.294983429 | 0.025334727 | 0.074476066 |
| 209620_s_at | 0.058983093  | 1.637448453 | 0.106899365 | 0.228864499 |
| 209621_s_at | 0.160009581  | 1.929863166 | 0.0584718   | 0.144026768 |
| 209622_at   | -0.0857554   | -2.01648681 | 0.04834239  | 0.124153436 |
| 209623_at   | -0.01760755  | -0.5988684  | 0.551570101 | 0.714163193 |
| 209624_s_at | -0.07337627  | -2.31924109 | 0.023889934 | 0.071131938 |
| 209625_at   | -0.08837478  | -2.4187236  | 0.018702525 | 0.058335833 |
| 209626_s_at | 0.138561851  | 3.256889559 | 0.001875822 | 0.008648948 |
| 209627_s_at | 0.20214344   | 3.910369243 | 0.000242061 | 0.001552332 |
| 209628_at   | 0.453799482  | 5.450583155 | 1.05E-06    | 1.66E-05    |
| 209629_s_at | 0.012755286  | 0.25560787  | 0.799149234 | 0.886224093 |
| 209630_s_at | -0.03994436  | -0.73359475 | 0.466122329 | 0.643616619 |
| 209631_s_at | 0.169351677  | 1.192047264 | 0.238050565 | 0.407529145 |
| 209632_at   | 0.07391045   | 2.923410426 | 0.004915031 | 0.019447229 |
| 209633_at   | 0.061640349  | 1.823604925 | 0.073315772 | 0.171617055 |
| 209635_at   | -0.36784687  | -5.39318908 | 1.30E-06    | 1.97E-05    |
| 209636_at   | 0.016304374  | 0.319712392 | 0.750324092 | 0.856228996 |
| 209637_s_at | -0.13926028  | -3.91091676 | 0.000241627 | 0.001550216 |
| 209638_x_at | 0.032908233  | 1.40603625  | 0.164996892 | 0.315493993 |
| 209639_s_at | -0.08863947  | -2.74180618 | 0.008091097 | 0.029367319 |
| 209640_at   | 0.0555717    | 1.429626492 | 0.158137181 | 0.305659844 |
| 209641_s_at | 0.015050079  | 0.432218986 | 0.667169529 | 0.79956139  |
| 209642_at   | -0.01944734  | -0.90227597 | 0.370606204 | 0.553853696 |
| 209643_s_at | 0.127270889  | 3.411643774 | 0.001176194 | 0.005836827 |
| 209644_x_at | 0.015277458  | 0.44559017  | 0.657536154 | 0.792732825 |
| 209645_s_at | -0.00124722  | -0.02861255 | 0.977270883 | 0.988596431 |
| 209646_x_at | -0.00775122  | -0.25192161 | 0.801983614 | 0.888271568 |
| 209647_s_at | -0.14000691  | -2.3892035  | 0.020125028 | 0.061892909 |
| 209648_x_at | 0.041761277  | 0.710225875 | 0.480382642 | 0.655663169 |
| 209649_at   | 0.090397848  | 1.450420314 | 0.152276193 | 0.297353416 |
| 209650_s_at | 0.025177992  | 0.78749758  | 0.434166189 | 0.614918565 |
| 209651_at   | 0.313559832  | 4.365292404 | 5.24E-05    | 0.000428806 |
| 209652_s_at | 0.03031144   | 0.76729111  | 0.445990777 | 0.625952951 |
| 209653_at   | -0.23723698  | -3.05666464 | 0.003369018 | 0.014171121 |
| 209654_at   | 0.199069662  | 2.993868711 | 0.004030256 | 0.016493014 |
| 209655_s_at | 0.430563633  | 3.663655697 | 0.000536546 | 0.003039972 |
| 209656_s_at | 0.263732517  | 3.067876097 | 0.003262189 | 0.013786644 |
| 209657_s_at | 0.105075549  | 1.602035989 | 0.114528135 | 0.241119813 |
| 209658_at   | 0.194907846  | 5.496097008 | 8.87E-07    | 1.45E-05    |
| 209659_s_at | 0.145995734  | 3.911377076 | 0.000241263 | 0.001548322 |
| 209660_at   | 0.245590037  | 1.98735471  | 0.051566082 | 0.13063836  |

|             |             |             |             |             |
|-------------|-------------|-------------|-------------|-------------|
| 209661_at   | -0.05476846 | -1.27219702 | 0.208331239 | 0.372396922 |
| 209662_at   | 0.402027417 | 3.882722697 | 0.000264983 | 0.001672924 |
| 209663_s_at | 0.2657475   | 3.823720906 | 0.000321081 | 0.001970311 |
| 209664_x_at | 0.01335323  | 0.265712512 | 0.791393758 | 0.881206115 |
| 209665_at   | 0.034249764 | 0.988341599 | 0.327051149 | 0.509305898 |
| 209666_s_at | 0.032052422 | 0.572467307 | 0.569196609 | 0.728103539 |
| 209667_at   | -0.03664023 | -0.86656049 | 0.389719259 | 0.572672658 |
| 209668_x_at | 0.050503884 | 1.261681333 | 0.212065411 | 0.377128939 |
| 209669_s_at | 0.379435253 | 4.67371491  | 1.78E-05    | 0.000172925 |
| 209670_at   | -0.50579415 | -6.95833522 | 3.29E-09    | 2.06E-07    |
| 209671_x_at | -0.39947983 | -6.64902404 | 1.09E-08    | 4.77E-07    |
| 209672_s_at | 0.025927818 | 1.686758241 | 0.096970103 | 0.212617762 |
| 209674_at   | 0.112287457 | 1.50887991  | 0.136705687 | 0.275097959 |
| 209675_s_at | 0.316878044 | 7.163893601 | 1.48E-09    | 1.20E-07    |
| 209676_at   | -0.00277918 | -0.12729238 | 0.899145046 | 0.946031744 |
| 209677_at   | -0.0873028  | -3.5972005  | 0.00066182  | 0.003623429 |
| 209678_s_at | -0.23669314 | -4.05875028 | 0.00014817  | 0.001024284 |
| 209679_s_at | -0.0663142  | -1.34840278 | 0.182720557 | 0.339563632 |
| 209680_s_at | 0.029364417 | 0.719705533 | 0.474568679 | 0.650555898 |
| 209681_at   | -0.00967423 | -0.1890619  | 0.85069797  | 0.918122108 |
| 209682_at   | 0.246349743 | 3.918828772 | 0.000235437 | 0.001515288 |
| 209683_at   | -0.53908856 | -4.97129118 | 6.13E-06    | 7.12E-05    |
| 209684_at   | 0.592503048 | 6.347859307 | 3.49E-08    | 1.12E-06    |
| 209685_s_at | -1.1955001  | -7.08195462 | 2.04E-09    | 1.48E-07    |
| 209686_at   | 0.389548509 | 3.333057008 | 0.00149304  | 0.007135807 |
| 209687_at   | 0.583851083 | 4.181009321 | 9.83E-05    | 0.000726176 |
| 209688_s_at | 0.188820524 | 4.649663981 | 1.94E-05    | 0.000186192 |
| 209689_at   | 0.070144038 | 1.89495604  | 0.06303782  | 0.15292223  |
| 209690_s_at | -0.04856623 | -1.15867583 | 0.251291141 | 0.424168285 |
| 209691_s_at | -0.14207896 | -2.16985818 | 0.034086663 | 0.094293213 |
| 209692_at   | 0.262286768 | 4.657916397 | 1.88E-05    | 0.000181654 |
| 209693_at   | 0.243829439 | 3.343547353 | 0.001446506 | 0.006954306 |
| 209694_at   | -0.31119348 | -4.56997087 | 2.57E-05    | 0.000235941 |
| 209695_at   | 0.094705843 | 2.36331145  | 0.021451616 | 0.065201007 |
| 209696_at   | -0.00121023 | -0.02720588 | 0.978388018 | 0.988987793 |
| 209697_at   | -0.10721905 | -1.39515123 | 0.168238589 | 0.320076584 |
| 209698_at   | 0.02561222  | 0.873778298 | 0.385807854 | 0.568459864 |
| 209699_x_at | 0.363667972 | 4.817339859 | 1.07E-05    | 0.000112567 |
| 209700_x_at | 0.080524811 | 0.697201784 | 0.488434975 | 0.66285485  |
| 209701_at   | 0.083836486 | 2.381314569 | 0.020521225 | 0.062869112 |
| 209702_at   | -0.32242081 | -5.67949504 | 4.46E-07    | 8.24E-06    |
| 209703_x_at | 0.605405048 | 6.462636514 | 2.24E-08    | 8.03E-07    |
| 209704_at   | -0.07777944 | -1.75966171 | 0.083687478 | 0.190010199 |
| 209705_at   | -0.06349293 | -1.99797163 | 0.050370472 | 0.12821992  |
| 209706_at   | 0.100756489 | 2.91977529  | 0.004965241 | 0.019611716 |
| 209707_at   | -0.025436   | -0.34494947 | 0.731368129 | 0.843246563 |
| 209708_at   | 0.253003377 | 2.698654695 | 0.009082625 | 0.032280845 |
| 209709_s_at | -0.03585087 | -0.86895106 | 0.388421054 | 0.571161575 |
| 209710_at   | 0.108121501 | 2.135210334 | 0.036937599 | 0.100426765 |
| 209711_at   | 0.153329503 | 2.938630503 | 0.004709878 | 0.01878068  |
| 209712_at   | 0.132374749 | 3.019041372 | 0.003751862 | 0.015534391 |
| 209713_s_at | 0.013891095 | 0.606734524 | 0.54637203  | 0.7103345   |
| 209714_s_at | -0.08915933 | -2.06978061 | 0.042892949 | 0.113015882 |
| 209715_at   | 0.113526975 | 2.051199224 | 0.044729259 | 0.116953167 |
| 209716_at   | 0.186235471 | 5.301485177 | 1.83E-06    | 2.63E-05    |
| 209717_at   | 0.364507252 | 5.776968765 | 3.08E-07    | 6.11E-06    |
| 209718_at   | 0.070387668 | 1.54265115  | 0.128301912 | 0.262560972 |
| 209719_x_at | 0.018725372 | 0.400429466 | 0.690297193 | 0.815650488 |
| 209720_s_at | -0.05653926 | -1.97860103 | 0.052570111 | 0.132655603 |
| 209721_s_at | 0.024828748 | 0.615072451 | 0.540889496 | 0.706350505 |
| 209722_s_at | -0.01490438 | -0.60058377 | 0.550434433 | 0.713365689 |
| 209723_at   | 0.165553716 | 1.631040937 | 0.10824827  | 0.231187599 |
| 209724_s_at | 0.005025601 | 0.16202076  | 0.871847192 | 0.930831216 |
| 209725_at   | 0.045697341 | 1.069221467 | 0.289357019 | 0.467633756 |
| 209726_at   | -0.78619106 | -7.14614579 | 1.59E-09    | 1.26E-07    |
| 209727_at   | -0.03720105 | -0.82358919 | 0.413514281 | 0.595769833 |
| 209728_at   | 0.051925566 | 0.484045785 | 0.630158522 | 0.774049201 |
| 209729_at   | 0.111355479 | 1.665549118 | 0.101144143 | 0.219486966 |
| 209730_at   | -0.0600016  | -0.97235367 | 0.334873578 | 0.517651285 |
| 209731_at   | -0.15772528 | -3.01030034 | 0.003846435 | 0.015870096 |
| 209732_at   | 0.195465529 | 2.737549693 | 0.008184289 | 0.029645992 |
| 209733_at   | -0.13248797 | -4.73367408 | 1.44E-05    | 0.000144586 |
| 209734_at   | 0.061064833 | 1.218311371 | 0.227990847 | 0.395519251 |
| 209735_at   | 0.004483693 | 0.038094002 | 0.969742289 | 0.984801785 |
| 209736_at   | 0.111613063 | 2.620710955 | 0.01115994  | 0.038117617 |

|             |             |             |             |             |
|-------------|-------------|-------------|-------------|-------------|
| 209737_at   | 0.180178691 | 2.873467784 | 0.005647875 | 0.021784311 |
| 209738_x_at | -0.00998188 | -0.23396114 | 0.815831068 | 0.896908444 |
| 209739_s_at | -0.16268001 | -3.33320072 | 0.001492393 | 0.007133478 |
| 209740_s_at | -0.0691611  | -1.45843986 | 0.150061632 | 0.29431003  |
| 209741_x_at | 0.136771907 | 2.265986764 | 0.027163145 | 0.078630435 |
| 209742_s_at | 0.003529385 | 0.082115535 | 0.93483484  | 0.966170385 |
| 209743_s_at | 0.021523383 | 0.571941979 | 0.569550123 | 0.728390491 |
| 209744_x_at | 0.070732446 | 2.189898697 | 0.032527291 | 0.090826399 |
| 209745_at   | -0.01653836 | -0.45537951 | 0.650520045 | 0.788250463 |
| 209746_s_at | 0.048447668 | 1.411715404 | 0.163324825 | 0.31303341  |
| 209747_at   | 0.265548947 | 4.351932937 | 5.48E-05    | 0.00044517  |
| 209748_at   | 0.115766512 | 1.957824785 | 0.05502041  | 0.137518717 |
| 209749_s_at | -0.19988035 | -5.17748416 | 2.89E-06    | 3.82E-05    |
| 209750_at   | 0.303910208 | 3.614569931 | 0.00062662  | 0.00346272  |
| 209751_s_at | -0.11965881 | -2.94458131 | 0.00463185  | 0.018522427 |
| 209752_at   | -0.01800071 | -0.46209102 | 0.645728091 | 0.785078605 |
| 209753_s_at | 0.013359646 | 0.374648892 | 0.709274807 | 0.828989739 |
| 209754_s_at | 0.105504596 | 3.497849112 | 0.000902272 | 0.004680714 |
| 209755_at   | -1.03911156 | -6.64431695 | 1.11E-08    | 4.83E-07    |
| 209756_s_at | 0.043741189 | 1.362176079 | 0.17835851  | 0.333900161 |
| 209757_s_at | 0.025347013 | 0.804726153 | 0.424232532 | 0.605744419 |
| 209758_s_at | 0.01276296  | 0.276263557 | 0.783318216 | 0.876121371 |
| 209759_s_at | 0.326663946 | 6.369879396 | 3.21E-08    | 1.05E-06    |
| 209760_at   | -0.2623572  | -5.60566189 | 5.88E-07    | 1.03E-05    |
| 209761_s_at | 0.337155276 | 4.889336824 | 8.24E-06    | 9.08E-05    |
| 209762_x_at | 0.140125723 | 2.810097914 | 0.006723202 | 0.025173707 |
| 209763_at   | -0.12092924 | -1.29374122 | 0.200833891 | 0.362887857 |
| 209764_at   | -0.19068128 | -3.75416126 | 0.000401897 | 0.002380909 |
| 209765_at   | 0.006177938 | 0.138775347 | 0.890103763 | 0.94117201  |
| 209766_at   | 0.024278762 | 0.667643399 | 0.506983667 | 0.678366338 |
| 209767_s_at | -0.59124575 | -7.35501057 | 7.04E-10    | 7.36E-08    |
| 209768_s_at | -0.5209178  | -7.9065016  | 8.26E-11    | 1.90E-08    |
| 209769_s_at | -0.10022693 | -1.242553   | 0.218984758 | 0.385746995 |
| 209770_at   | 0.127585293 | 2.498944793 | 0.015281604 | 0.049397181 |
| 209771_x_at | 0.617396372 | 3.187484726 | 0.002303486 | 0.010261902 |
| 209772_s_at | 0.177396073 | 2.763097094 | 0.007639409 | 0.027978404 |
| 209773_s_at | 0.011447104 | 0.266099133 | 0.791097436 | 0.881020515 |
| 209774_x_at | 0.444721363 | 3.151820696 | 0.002557366 | 0.011213496 |
| 209775_x_at | -0.03401418 | -0.96262737 | 0.33969239  | 0.522546116 |
| 209776_s_at | -0.02391053 | -0.74998738 | 0.456264665 | 0.635198167 |
| 209777_s_at | 0.031266803 | 0.907147272 | 0.368046369 | 0.55121237  |
| 209778_at   | 0.050434424 | 1.326015008 | 0.189983229 | 0.348766912 |
| 209779_at   | 0.013803734 | 0.685866243 | 0.495503669 | 0.668630736 |
| 209780_at   | -0.10891504 | -2.16402966 | 0.034552322 | 0.09529822  |
| 209781_s_at | 0.101699313 | 1.620783321 | 0.110436431 | 0.234605237 |
| 209782_s_at | -0.42242762 | -5.48815605 | 9.13E-07    | 1.49E-05    |
| 209783_at   | -0.03077953 | -0.77997896 | 0.438544145 | 0.618981017 |
| 209784_s_at | -0.03973022 | -0.78728524 | 0.434289475 | 0.615034704 |
| 209785_s_at | 0.229636077 | 3.014300899 | 0.003802879 | 0.01571505  |
| 209786_at   | 0.040557394 | 0.409425161 | 0.683721255 | 0.810914077 |
| 209787_s_at | 0.068566538 | 1.070953733 | 0.288583906 | 0.466772535 |
| 209788_s_at | 0.07310473  | 1.276500544 | 0.206817217 | 0.370449082 |
| 209789_at   | -0.3615114  | -6.30865466 | 4.06E-08    | 1.26E-06    |
| 209790_s_at | 0.076739038 | 2.527961005 | 0.014190665 | 0.046380664 |
| 209791_at   | 0.269836418 | 3.306505589 | 0.00161722  | 0.007631378 |
| 209792_s_at | -0.03210411 | -0.73936474 | 0.462638794 | 0.640557999 |
| 209793_at   | -0.68798676 | -8.0313184  | 5.09E-11    | 1.42E-08    |
| 209794_at   | 0.021131913 | 0.417339107 | 0.677956344 | 0.806881972 |
| 209795_at   | 0.064070136 | 1.36593591  | 0.177181679 | 0.332214935 |
| 209796_s_at | -0.29543739 | -3.4956765  | 0.000908361 | 0.004705746 |
| 209797_at   | 0.010266417 | 0.153703869 | 0.878371635 | 0.934828889 |
| 209798_at   | 0.022463834 | 0.63345213  | 0.528904504 | 0.696417421 |
| 209799_at   | -0.00201789 | -0.08819052 | 0.930026119 | 0.963529308 |
| 209800_at   | 0.057614818 | 1.132062377 | 0.262222048 | 0.436703864 |
| 209802_at   | 0.010115378 | 0.304233818 | 0.762028136 | 0.863087292 |
| 209803_s_at | 0.067522176 | 2.261885511 | 0.027430971 | 0.079226118 |
| 209804_at   | -0.02372602 | -0.78589203 | 0.435098892 | 0.615741884 |
| 209805_at   | 0.012658671 | 0.283548825 | 0.777756113 | 0.87253651  |
| 209806_at   | -0.15104394 | -3.01322878 | 0.003814506 | 0.015755815 |
| 209807_s_at | 0.020544822 | 0.384202962 | 0.702219479 | 0.824148975 |
| 209808_x_at | 0.031637289 | 0.991748893 | 0.325399918 | 0.50758344  |
| 209810_at   | 0.003334883 | 0.068296516 | 0.945782239 | 0.972056384 |
| 209811_at   | -0.04711684 | -1.1306091  | 0.262828507 | 0.437463469 |
| 209812_x_at | 0.004813756 | 0.141226669 | 0.888175534 | 0.939980497 |
| 209813_x_at | 0.235585646 | 2.300280329 | 0.025012783 | 0.073753167 |

|             |             |             |             |             |
|-------------|-------------|-------------|-------------|-------------|
| 209814_at   | 0.068823112 | 1.114520984 | 0.269608574 | 0.445257842 |
| 209815_at   | 0.444245341 | 5.409185579 | 1.23E-06    | 1.88E-05    |
| 209816_at   | 0.021113298 | 0.561090247 | 0.576876616 | 0.734022807 |
| 209817_at   | 0.192144274 | 2.970403464 | 0.004306976 | 0.01744493  |
| 209818_s_at | -0.34941033 | -6.26726589 | 4.76E-08    | 1.41E-06    |
| 209819_at   | -0.02822359 | -1.25811821 | 0.213341879 | 0.378660654 |
| 209820_s_at | 0.010969043 | 0.270794559 | 0.787501143 | 0.878710735 |
| 209821_at   | 0.258949276 | 2.829995687 | 0.006366758 | 0.02406081  |
| 209822_s_at | -0.55590217 | -5.47819138 | 9.48E-07    | 1.53E-05    |
| 209823_x_at | 0.075305573 | 1.065026971 | 0.291234953 | 0.469637523 |
| 209824_s_at | -0.09262047 | -2.35023829 | 0.022150653 | 0.066902548 |
| 209825_s_at | -0.12638494 | -3.69342528 | 0.000488093 | 0.002807807 |
| 209826_at   | 0.097088104 | 1.595751764 | 0.115926779 | 0.243285106 |
| 209827_s_at | 0.052069923 | 1.059889396 | 0.293546549 | 0.472099836 |
| 209828_s_at | -0.02801749 | -0.71263669 | 0.478900298 | 0.654386282 |
| 209829_at   | -0.1084046  | -1.08947285 | 0.280408025 | 0.457617412 |
| 209830_s_at | -0.00551813 | -0.13379505 | 0.894023346 | 0.943396958 |
| 209831_x_at | 0.143903742 | 3.145528784 | 0.002604794 | 0.011393093 |
| 209832_s_at | 0.040151615 | 1.535813844 | 0.129969243 | 0.265195882 |
| 209833_at   | -0.05632008 | -1.35785258 | 0.179719132 | 0.335688028 |
| 209834_at   | 0.351685757 | 5.148694061 | 3.21E-06    | 4.19E-05    |
| 209835_x_at | 0.408115499 | 4.332238147 | 5.87E-05    | 0.000470558 |
| 209836_x_at | -0.0534517  | -0.8769674  | 0.384087507 | 0.566803331 |
| 209837_at   | 0.074781324 | 2.115945079 | 0.038611229 | 0.103926248 |
| 209838_at   | -0.05852064 | -1.10932708 | 0.271823521 | 0.447771332 |
| 209839_at   | -0.38726435 | -3.55293694 | 0.000760245 | 0.00406519  |
| 209840_s_at | -0.52341782 | -7.20785399 | 1.25E-09    | 1.08E-07    |
| 209841_s_at | -0.34442357 | -4.7586585  | 1.32E-05    | 0.000134105 |
| 209842_at   | 0.355506167 | 4.090441486 | 0.000133274 | 0.000939184 |
| 209843_s_at | 0.027524236 | 0.525153128 | 0.601459264 | 0.752784178 |
| 209844_at   | -0.02378893 | -0.65284797 | 0.516408902 | 0.686236699 |
| 209845_at   | -0.47099326 | -4.80092428 | 1.13E-05    | 0.000118268 |
| 209846_s_at | 0.296634517 | 3.584004181 | 0.000689815 | 0.003750966 |
| 209847_at   | -0.04375642 | -1.54055396 | 0.128811505 | 0.263326494 |
| 209848_s_at | -0.0199228  | -0.59917049 | 0.551370018 | 0.714007559 |
| 209849_s_at | -0.07450444 | -1.68506192 | 0.097298664 | 0.213143611 |
| 209850_s_at | 0.090865886 | 2.479164055 | 0.016068139 | 0.051485323 |
| 209851_at   | -0.06405154 | -1.54654481 | 0.12736006  | 0.261183675 |
| 209852_x_at | -0.09408627 | -2.18019089 | 0.033274663 | 0.092493548 |
| 209853_s_at | -0.18665459 | -4.33712224 | 5.77E-05    | 0.000463974 |
| 209854_s_at | 0.004277437 | 0.109889183 | 0.912872944 | 0.953812433 |
| 209855_s_at | 0.006709312 | 0.154265901 | 0.87793046  | 0.934668956 |
| 209856_x_at | -0.24310502 | -5.12471581 | 3.50E-06    | 4.50E-05    |
| 209857_s_at | 0.111019915 | 3.800492916 | 0.000346157 | 0.002097403 |
| 209858_x_at | 0.050364749 | 1.531339941 | 0.131069545 | 0.266856185 |
| 209859_at   | -0.05785768 | -0.85477581 | 0.396158448 | 0.578787623 |
| 209860_s_at | -0.05208434 | -0.65537503 | 0.514792501 | 0.685193034 |
| 209861_s_at | 0.085087484 | 1.111818824 | 0.270759323 | 0.446523087 |
| 209862_s_at | -0.09402173 | -2.20149977 | 0.031653537 | 0.088888461 |
| 209863_s_at | 0.129252676 | 2.712894035 | 0.008743759 | 0.031272092 |
| 209864_at   | 0.04011885  | 0.92505615  | 0.358732748 | 0.541784401 |
| 209865_at   | 0.056375069 | 1.721376449 | 0.090461395 | 0.201691229 |
| 209866_s_at | 0.015867353 | 0.283377651 | 0.777886667 | 0.872598985 |
| 209867_s_at | -0.18025426 | -3.65836501 | 0.000545624 | 0.003083202 |
| 209868_s_at | -0.40468347 | -6.82430771 | 5.54E-09    | 2.96E-07    |
| 209869_at   | 0.034283157 | 0.922954124 | 0.359817981 | 0.542932727 |
| 209870_s_at | -0.00040924 | -0.01192692 | 0.990524453 | 0.995514052 |
| 209871_s_at | 0.110880149 | 1.798503971 | 0.077251023 | 0.178663978 |
| 209872_s_at | -0.03059595 | -0.52900084 | 0.598804183 | 0.750743584 |
| 209873_s_at | 0.054556797 | 1.58425341  | 0.118521528 | 0.247359864 |
| 209874_x_at | 0.047730831 | 1.287989828 | 0.202815327 | 0.36547844  |
| 209875_s_at | 0.228782949 | 1.462313414 | 0.149001031 | 0.292828592 |
| 209876_at   | -0.17917431 | -4.98263784 | 5.88E-06    | 6.87E-05    |
| 209877_at   | -0.15545309 | -2.47379616 | 0.016287787 | 0.052039877 |
| 209878_s_at | 0.144380655 | 3.667068113 | 0.000530767 | 0.003013342 |
| 209879_at   | 0.162806723 | 2.144168845 | 0.03618117  | 0.098831565 |
| 209880_s_at | -0.07471625 | -1.38454795 | 0.171443319 | 0.324378511 |
| 209881_s_at | 0.059064777 | 1.811371055 | 0.075212241 | 0.174999244 |
| 209882_at   | 0.050983009 | 0.905188188 | 0.369074495 | 0.552326457 |
| 209883_at   | 0.373731667 | 4.177453478 | 9.94E-05    | 0.000733257 |
| 209884_s_at | -0.03270386 | -1.34497431 | 0.183818872 | 0.340987719 |
| 209885_at   | 0.069100954 | 1.607082294 | 0.113414894 | 0.23923814  |
| 209886_s_at | -0.05262264 | -0.95502403 | 0.343491008 | 0.526388545 |
| 209887_at   | -0.00171735 | -0.0415658  | 0.966986223 | 0.983266933 |
| 209888_s_at | -0.06761707 | -1.23384967 | 0.222187532 | 0.38919829  |

|             |             |             |             |             |
|-------------|-------------|-------------|-------------|-------------|
| 209889_at   | -0.0049203  | -0.11755381 | 0.906823433 | 0.950470172 |
| 209890_at   | 0.148511992 | 1.88674833  | 0.064154292 | 0.155049947 |
| 209891_at   | -0.02371645 | -1.14559915 | 0.25662069  | 0.430223267 |
| 209892_at   | -0.03387188 | -0.98839311 | 0.327026146 | 0.509284707 |
| 209893_s_at | 0.008999944 | 0.277179731 | 0.782618111 | 0.875774135 |
| 209894_at   | 0.218945051 | 3.020474881 | 0.003736561 | 0.015483947 |
| 209895_at   | -0.13842142 | -1.95462043 | 0.055406887 | 0.138290873 |
| 209896_s_at | -0.16912907 | -1.82760919 | 0.07270382  | 0.170485416 |
| 209897_s_at | -0.40436959 | -5.48342621 | 9.30E-07    | 1.51E-05    |
| 209898_x_at | -0.03003761 | -0.67390991 | 0.503019794 | 0.675185026 |
| 209899_s_at | 0.153353256 | 3.015949338 | 0.003785066 | 0.015654465 |
| 209900_s_at | 0.370668737 | 3.541990611 | 0.000786653 | 0.00417295  |
| 209901_x_at | -0.01073743 | -0.15363989 | 0.878421858 | 0.934828889 |
| 209902_at   | -0.06373567 | -2.14202177 | 0.036361217 | 0.099209739 |
| 209903_s_at | -0.09495818 | -1.18485378 | 0.240861103 | 0.410986729 |
| 209904_at   | 0.018880274 | 0.754890128 | 0.453339935 | 0.632631874 |
| 209905_at   | -0.0392755  | -0.80730281 | 0.422758685 | 0.604663844 |
| 209906_at   | 0.078930891 | 1.271699678 | 0.20850674  | 0.37261777  |
| 209907_s_at | 0.260771893 | 5.606057858 | 5.87E-07    | 1.03E-05    |
| 209908_s_at | 0.088217692 | 1.247228824 | 0.217278187 | 0.383484588 |
| 209909_s_at | 0.143133939 | 3.680936565 | 0.000507887 | 0.002904437 |
| 209910_at   | -0.03437309 | -1.03692181 | 0.304034703 | 0.483883015 |
| 209911_x_at | 0.121250221 | 2.052609321 | 0.044587558 | 0.116675868 |
| 209912_s_at | 0.03566633  | 0.85085117  | 0.398317435 | 0.580632539 |
| 209913_x_at | 0.014911645 | 0.332834522 | 0.740447703 | 0.849325929 |
| 209914_s_at | -0.1453249  | -1.82961734 | 0.072398544 | 0.169974559 |
| 209915_s_at | -0.41851278 | -6.02072462 | 1.22E-07    | 2.96E-06    |
| 209916_at   | 0.067946835 | 1.447718844 | 0.153027911 | 0.298508289 |
| 209917_s_at | 0.071914945 | 1.64451615  | 0.105427359 | 0.226609984 |
| 209918_at   | 0.020572181 | 0.449001481 | 0.655087681 | 0.791018551 |
| 209919_x_at | -0.01837379 | -0.34392793 | 0.732132254 | 0.843665429 |
| 209920_at   | -0.03584339 | -0.69238647 | 0.491430913 | 0.66550604  |
| 209921_at   | 0.558339065 | 5.031003157 | 4.93E-06    | 5.95E-05    |
| 209922_at   | 0.005278949 | 0.253293341 | 0.800928569 | 0.887511147 |
| 209923_s_at | 0.05470046  | 1.960147845 | 0.05474167  | 0.136990577 |
| 209924_at   | -0.07259653 | -1.84945646 | 0.069440068 | 0.164768543 |
| 209925_at   | 0.033107633 | 1.052745363 | 0.296781864 | 0.475813426 |
| 209926_at   | -0.18070819 | -3.41289493 | 0.001171707 | 0.005816498 |
| 209927_s_at | 0.050483213 | 1.42586522  | 0.159215818 | 0.307239782 |
| 209928_s_at | -0.01236282 | -0.32708472 | 0.744770014 | 0.852130241 |
| 209929_s_at | 2.10E-05    | 0.000648092 | 0.9994851   | 0.999753538 |
| 209930_s_at | 0.010776959 | 0.364944798 | 0.716467195 | 0.833944445 |
| 209931_s_at | -0.52421524 | -7.30781697 | 8.46E-10    | 8.45E-08    |
| 209932_s_at | 0.149273832 | 3.023036837 | 0.003709359 | 0.015384064 |
| 209933_s_at | 0.133232389 | 2.722452242 | 0.008522835 | 0.030643809 |
| 209934_s_at | -0.20500234 | -5.19819837 | 2.68E-06    | 3.60E-05    |
| 209935_at   | -0.18348758 | -2.94471038 | 0.004630171 | 0.018519027 |
| 209936_at   | -0.00207163 | -0.05386331 | 0.957227385 | 0.978106138 |
| 209937_at   | -0.02958509 | -0.69857    | 0.487585562 | 0.661943315 |
| 209938_at   | 0.003772368 | 0.162785392 | 0.871247795 | 0.930480237 |
| 209939_x_at | 0.083012903 | 1.789302223 | 0.078737193 | 0.181333755 |
| 209940_at   | 0.012257689 | 0.393848753 | 0.695123025 | 0.819370652 |
| 209941_at   | 0.054104291 | 1.06477705  | 0.291347112 | 0.469711955 |
| 209942_x_at | 0.000397005 | 0.009957388 | 0.992089127 | 0.996347211 |
| 209943_at   | 0.059662844 | 1.731098823 | 0.088699692 | 0.198746066 |
| 209944_at   | 0.295169051 | 5.424139218 | 1.16E-06    | 1.80E-05    |
| 209945_s_at | -0.03287882 | -0.38012923 | 0.705224601 | 0.826246173 |
| 209946_at   | 0.129591715 | 3.613573874 | 0.000628589 | 0.003472119 |
| 209947_at   | -0.07604455 | -2.01778896 | 0.048202442 | 0.123905517 |
| 209948_at   | 0.03366098  | 0.546933656 | 0.586502323 | 0.741498213 |
| 209949_at   | -0.00882655 | -0.20248258 | 0.840241239 | 0.91209719  |
| 209950_s_at | 0.071190819 | 0.802775276 | 0.42535048  | 0.606797869 |
| 209951_s_at | -0.01573119 | -0.3907394  | 0.697407639 | 0.820977561 |
| 209952_s_at | -0.04218031 | -1.26137031 | 0.212176606 | 0.377293231 |
| 209953_s_at | -0.05609971 | -1.34932077 | 0.182427326 | 0.339271859 |
| 209954_x_at | -0.04779573 | -1.21549511 | 0.229054432 | 0.396732963 |
| 209955_s_at | 0.014687719 | 0.366410068 | 0.715379506 | 0.833161539 |
| 209956_s_at | -1.13503698 | -6.48810353 | 2.03E-08    | 7.47E-07    |
| 209957_s_at | -0.00145702 | -0.02547952 | 0.979759105 | 0.989861457 |
| 209958_s_at | 0.053190867 | 1.123692448 | 0.265728477 | 0.440943715 |
| 209959_at   | -0.22343029 | -2.31197469 | 0.024314837 | 0.07213746  |
| 209960_at   | 0.07296615  | 2.111071873 | 0.039044914 | 0.104799945 |
| 209961_s_at | 0.045871779 | 1.349643046 | 0.182324467 | 0.339165247 |
| 209962_at   | 0.095058074 | 1.564485944 | 0.123091304 | 0.254437655 |
| 209963_s_at | 0.110344042 | 2.836954671 | 0.00624627  | 0.023691614 |

|             |             |             |             |             |
|-------------|-------------|-------------|-------------|-------------|
| 209964_s_at | 0.010535189 | 0.218561941 | 0.827751136 | 0.904419762 |
| 209965_s_at | 0.009991606 | 0.337651432 | 0.736833132 | 0.847109799 |
| 209966_x_at | -0.12981032 | -2.62407044 | 0.011062147 | 0.037839133 |
| 209967_s_at | -0.13547674 | -2.64169736 | 0.010561717 | 0.036446294 |
| 209968_s_at | -0.08506894 | -2.05894909 | 0.043955265 | 0.115304848 |
| 209969_s_at | 0.061527652 | 1.574554871 | 0.120746264 | 0.25072676  |
| 209970_x_at | 0.012520616 | 0.202017074 | 0.840603467 | 0.912319036 |
| 209971_x_at | 0.00354366  | 0.06596643  | 0.947629222 | 0.973171378 |
| 209972_s_at | 0.017468463 | 0.4001674   | 0.690489128 | 0.815780378 |
| 209973_at   | -0.04285286 | -1.05085128 | 0.297643723 | 0.47672012  |
| 209974_s_at | 0.312344088 | 4.878886588 | 8.55E-06    | 9.38E-05    |
| 209975_at   | -0.04977428 | -1.06736401 | 0.290187595 | 0.468484773 |
| 209976_s_at | -0.08178683 | -1.62057631 | 0.110480957 | 0.234653998 |
| 209977_at   | 0.013166495 | 0.433386535 | 0.666326084 | 0.79906554  |
| 209978_s_at | 0.016615398 | 0.493673185 | 0.623383343 | 0.768770651 |
| 209979_at   | -0.06719319 | -0.93264989 | 0.354829869 | 0.537962429 |
| 209980_s_at | 0.047471277 | 1.120174862 | 0.267211946 | 0.442501715 |
| 209981_at   | -0.13803755 | -2.09774148 | 0.040252981 | 0.107395751 |
| 209982_s_at | -0.29258773 | -4.05382961 | 0.000150622 | 0.001037386 |
| 209983_s_at | -0.15515674 | -2.57228854 | 0.012659697 | 0.042282877 |
| 209984_at   | -0.02359737 | -0.53120821 | 0.59728347  | 0.749654006 |
| 209985_s_at | 0.035197718 | 0.990819526 | 0.325849752 | 0.508036879 |
| 209986_at   | -0.03759588 | -0.96291923 | 0.339547128 | 0.522390582 |
| 209987_s_at | 0.943079143 | 7.470416433 | 4.50E-10    | 5.46E-08    |
| 209988_s_at | 1.19714251  | 7.713271504 | 1.75E-10    | 2.98E-08    |
| 209989_at   | 0.041173501 | 0.89101749  | 0.376565729 | 0.559355059 |
| 209990_s_at | -0.37539389 | -2.40882884 | 0.01916895  | 0.059559144 |
| 209991_x_at | -0.22856761 | -3.49364218 | 0.000914098 | 0.004731625 |
| 209992_at   | 0.301587464 | 3.373093645 | 0.0013227   | 0.006447873 |
| 209993_at   | 0.181875731 | 2.065022858 | 0.043356799 | 0.11406299  |
| 209994_s_at | 0.208324641 | 2.04686605  | 0.045167139 | 0.117835978 |
| 209995_s_at | -0.00052526 | -0.01115902 | 0.991134497 | 0.99585843  |
| 209996_x_at | 0.057789189 | 1.583848641 | 0.118613714 | 0.247450532 |
| 209997_x_at | 0.024798657 | 0.511094964 | 0.611205989 | 0.760087319 |
| 209998_at   | 0.075487793 | 1.894295092 | 0.063127113 | 0.153088986 |
| 209999_x_at | -0.00356086 | -0.0726553  | 0.942327988 | 0.970112467 |
| 210000_s_at | -0.00798932 | -0.28908951 | 0.773533742 | 0.870302912 |
| 210001_s_at | -0.00537794 | -0.15281199 | 0.879071807 | 0.935104423 |
| 210002_at   | -0.04823319 | -1.84919624 | 0.069478203 | 0.164824028 |
| 210004_at   | 0.057383595 | 0.657561663 | 0.513396023 | 0.684058645 |
| 210005_at   | 0.018900145 | 0.600155988 | 0.550717538 | 0.71357614  |
| 210006_at   | -0.23426164 | -5.19763142 | 2.68E-06    | 3.60E-05    |
| 210007_s_at | -0.10817623 | -2.87758835 | 0.005583782 | 0.021583671 |
| 210008_s_at | 0.10383892  | 2.109493134 | 0.039186319 | 0.105095713 |
| 210009_s_at | -0.05247825 | -2.23423463 | 0.029298421 | 0.083539941 |
| 210010_s_at | 0.182621423 | 3.628727049 | 0.000599259 | 0.003334421 |
| 210011_s_at | 0.098971938 | 2.174045358 | 0.033755542 | 0.093562557 |
| 210012_s_at | 0.012642893 | 0.53275789  | 0.596216933 | 0.748881049 |
| 210013_at   | -0.05447786 | -1.19936923 | 0.235214302 | 0.404190925 |
| 210014_x_at | -0.13040816 | -2.12838489 | 0.037523155 | 0.101666253 |
| 210015_s_at | -0.73084    | -7.53540203 | 3.49E-10    | 4.66E-08    |
| 210016_at   | -1.4690308  | -6.49883222 | 1.95E-08    | 7.25E-07    |
| 210017_at   | 0.023175218 | 0.902381476 | 0.370550644 | 0.553830826 |
| 210018_x_at | 0.106488596 | 2.654907356 | 0.010200318 | 0.035435104 |
| 210019_at   | 0.021328805 | 0.690329212 | 0.492713951 | 0.666455975 |
| 210020_x_at | -0.01272313 | -0.37589209 | 0.708355285 | 0.828236997 |
| 210021_s_at | -0.19865048 | -4.78178793 | 1.21E-05    | 0.000125185 |
| 210022_at   | 0.037022231 | 0.903776719 | 0.369816367 | 0.553010776 |
| 210023_s_at | -0.10278336 | -2.59893699 | 0.011813093 | 0.039937645 |
| 210024_s_at | -0.04118059 | -0.49327524 | 0.623662752 | 0.768993714 |
| 210025_s_at | -0.10308308 | -1.63046722 | 0.10836972  | 0.231347481 |
| 210026_s_at | 0.081243752 | 2.424942204 | 0.018414625 | 0.057624031 |
| 210027_s_at | -0.10734299 | -1.97756206 | 0.052690384 | 0.13286158  |
| 210028_s_at | -0.05172599 | -1.0956453  | 0.277719196 | 0.454395984 |
| 210029_at   | 0.04410325  | 0.913584613 | 0.364680954 | 0.548045368 |
| 210030_at   | -0.0551452  | -0.97041162 | 0.335832126 | 0.518660908 |
| 210031_at   | 0.00960532  | 0.24853705  | 0.804588367 | 0.88991173  |
| 210032_s_at | 0.30708148  | 2.833431902 | 0.006306998 | 0.023879391 |
| 210033_s_at | 0.547471359 | 2.758250924 | 0.007740134 | 0.028293971 |
| 210034_s_at | 0.025311951 | 1.304215794 | 0.197262538 | 0.358216136 |
| 210035_s_at | -0.01169907 | -0.71913939 | 0.474914785 | 0.650830724 |
| 210036_s_at | -0.06679555 | -1.91806178 | 0.059982916 | 0.147043854 |
| 210037_s_at | -0.00782502 | -0.2182383  | 0.828002104 | 0.904481951 |
| 210038_at   | 0.150924873 | 2.784509309 | 0.007208632 | 0.026678037 |
| 210039_s_at | 0.058341166 | 1.359808979 | 0.179102469 | 0.334830066 |

|             |             |             |             |             |
|-------------|-------------|-------------|-------------|-------------|
| 210040_at   | -1.0498828  | -6.42030938 | 2.64E-08    | 9.00E-07    |
| 210041_s_at | 0.056097062 | 1.677253446 | 0.098822885 | 0.215590763 |
| 210042_s_at | 0.207187265 | 3.36192849  | 0.001368257 | 0.006627305 |
| 210043_at   | -0.00618137 | -0.16383372 | 0.870426132 | 0.930091684 |
| 210044_s_at | 0.0884914   | 1.789423073 | 0.078717521 | 0.181305064 |
| 210045_at   | 0.074111541 | 1.190764087 | 0.238550162 | 0.408212423 |
| 210046_s_at | -0.08275738 | -1.22350123 | 0.226040315 | 0.393525526 |
| 210047_at   | 0.007511933 | 0.186686048 | 0.852551979 | 0.919069622 |
| 210048_at   | -0.10128742 | -2.6766462  | 0.009630093 | 0.033843526 |
| 210049_at   | 0.038650048 | 0.893311828 | 0.375346356 | 0.558365655 |
| 210050_at   | -0.01935198 | -0.79552439 | 0.429521031 | 0.610467608 |
| 210051_at   | 0.504876881 | 7.434984502 | 5.16E-10    | 5.89E-08    |
| 210052_s_at | -0.06459901 | -1.34848598 | 0.182693964 | 0.339563632 |
| 210053_at   | 0.137432306 | 3.208908639 | 0.002162565 | 0.009735029 |
| 210054_at   | 0.106314482 | 2.815022268 | 0.006633315 | 0.024899722 |
| 210055_at   | -0.07199295 | -2.42973858 | 0.018195293 | 0.057081571 |
| 210056_at   | -0.06223472 | -1.28661097 | 0.203292526 | 0.366131355 |
| 210057_at   | -0.02451921 | -0.95158964 | 0.345215912 | 0.528206701 |
| 210058_at   | -0.08337073 | -2.29394857 | 0.025398053 | 0.074622957 |
| 210059_s_at | -0.05031839 | -1.73641686 | 0.087748118 | 0.197265537 |
| 210060_at   | -0.01657009 | -0.45116451 | 0.653537128 | 0.790041617 |
| 210061_at   | 0.030624955 | 1.375028164 | 0.174360326 | 0.32843765  |
| 210062_s_at | 0.006548554 | 0.145836599 | 0.884551176 | 0.938364574 |
| 210063_at   | 0.066177532 | 1.494213276 | 0.140488532 | 0.280744372 |
| 210064_s_at | -0.03874523 | -0.88998139 | 0.377117204 | 0.559788829 |
| 210065_s_at | -0.14356213 | -3.14819459 | 0.0025846   | 0.011316957 |
| 210066_s_at | 0.244460634 | 1.149722944 | 0.254931368 | 0.428178161 |
| 210067_at   | 0.054286484 | 0.2633924   | 0.79317264  | 0.882339559 |
| 210068_s_at | 0.757498722 | 4.791632546 | 1.17E-05    | 0.000121451 |
| 210069_at   | 0.09268357  | 1.854010474 | 0.068775517 | 0.163520552 |
| 210070_s_at | 0.03943083  | 0.827587065 | 0.411263929 | 0.593503423 |
| 210072_at   | 0.114892511 | 1.830886494 | 0.072206163 | 0.169656582 |
| 210073_at   | 0.157033353 | 2.639340644 | 0.010627407 | 0.036624815 |
| 210074_at   | -0.00825555 | -0.22185605 | 0.82519774  | 0.902963479 |
| 210075_at   | -0.04178368 | -0.71413113 | 0.477982701 | 0.65359206  |
| 210076_x_at | 0.001114996 | 0.027893431 | 0.97784198  | 0.988793668 |
| 210077_s_at | -0.00800099 | -0.16014963 | 0.873314294 | 0.931796558 |
| 210078_s_at | -1.39625675 | -7.35344463 | 7.09E-10    | 7.38E-08    |
| 210079_x_at | -0.90017243 | -6.87361208 | 4.57E-09    | 2.61E-07    |
| 210080_x_at | -0.03186529 | -0.88901231 | 0.377633473 | 0.560250797 |
| 210081_at   | 0.013615817 | 0.465003754 | 0.643653093 | 0.783498407 |
| 210082_at   | -0.0063022  | -0.16760191 | 0.867473869 | 0.928285546 |
| 210083_at   | -0.05166651 | -0.89866278 | 0.372512221 | 0.555629149 |
| 210084_x_at | -0.00950427 | -0.21494056 | 0.830560375 | 0.906146965 |
| 210085_s_at | 0.012731083 | 0.269628378 | 0.788393907 | 0.879223967 |
| 210086_at   | -0.0455043  | -0.88557038 | 0.379470732 | 0.562121694 |
| 210087_s_at | -0.00906248 | -0.26022744 | 0.795601064 | 0.883952834 |
| 210088_x_at | 0.050067866 | 1.34682211  | 0.183226305 | 0.340205651 |
| 210089_s_at | 0.063359548 | 1.543195974 | 0.12816979  | 0.262362673 |
| 210090_at   | -0.33307975 | -3.94019755 | 0.000219472 | 0.001427129 |
| 210091_s_at | 0.539009195 | 2.837493899 | 0.006237022 | 0.023663706 |
| 210092_at   | 0.031128515 | 0.519697218 | 0.605233383 | 0.755371285 |
| 210093_s_at | 0.079749295 | 1.46612198  | 0.147963955 | 0.291415701 |
| 210094_s_at | 0.096900755 | 1.519554742 | 0.134003453 | 0.271137375 |
| 210095_s_at | 0.395012757 | 3.467087752 | 0.000992208 | 0.005061494 |
| 210096_at   | -0.01101359 | -0.35552268 | 0.723475377 | 0.838308571 |
| 210097_s_at | -0.11432595 | -1.65039194 | 0.10421619  | 0.224691493 |
| 210098_s_at | -0.0240932  | -0.69233719 | 0.491461622 | 0.665527462 |
| 210099_at   | -0.0235864  | -0.63502329 | 0.527886454 | 0.695709632 |
| 210100_s_at | 0.070822885 | 0.572264212 | 0.569333267 | 0.72823819  |
| 210101_x_at | 0.044621325 | 0.709930636 | 0.480564352 | 0.655817949 |
| 210102_at   | 0.068928641 | 0.911354494 | 0.365844612 | 0.549166271 |
| 210103_s_at | -0.05155756 | -0.71378246 | 0.478196697 | 0.653768669 |
| 210104_at   | -0.08703708 | -2.53353499 | 0.013989349 | 0.045860192 |
| 210105_s_at | 0.333794579 | 5.419864031 | 1.18E-06    | 1.82E-05    |
| 210106_at   | 0.172480213 | 3.87129642  | 0.000275054 | 0.001728447 |
| 210107_at   | -0.03193069 | -0.66397506 | 0.509311859 | 0.680401914 |
| 210108_at   | -0.30432059 | -7.05891106 | 2.23E-09    | 1.58E-07    |
| 210109_at   | 0.14515461  | 4.751932014 | 1.35E-05    | 0.000136801 |
| 210110_x_at | 0.250947428 | 3.712334961 | 0.00045952  | 0.002667818 |
| 210111_s_at | 0.153310306 | 2.660134102 | 0.010060469 | 0.035066486 |
| 210112_at   | 0.061674626 | 1.937712321 | 0.057484809 | 0.142228249 |
| 210113_s_at | -0.0122585  | -0.3621458  | 0.718546565 | 0.835261089 |
| 210114_at   | 0.087959331 | 2.501065641 | 0.01519937  | 0.049167785 |
| 210115_at   | -0.09121507 | -2.32340078 | 0.02364968  | 0.07059521  |



|             |             |             |             |             |
|-------------|-------------|-------------|-------------|-------------|
| 210116_at   | 0.057010185 | 2.474063684 | 0.016276777 | 0.05201866  |
| 210117_at   | 0.311629152 | 2.997365913 | 0.003990461 | 0.016363123 |
| 210118_s_at | -0.00561439 | -0.18989044 | 0.850051606 | 0.917755921 |
| 210119_at   | 0.030094105 | 0.559974819 | 0.577632267 | 0.734709211 |
| 210120_s_at | 0.030771048 | 0.950180226 | 0.345925422 | 0.529038736 |
| 210121_at   | -0.12898864 | -3.0266606  | 0.003671199 | 0.01524419  |
| 210122_at   | -0.00951447 | -0.20208295 | 0.840552204 | 0.912319036 |
| 210123_s_at | -0.02228728 | -0.61540411 | 0.540672002 | 0.706186422 |
| 210124_x_at | -0.03235366 | -1.00777507 | 0.3177081   | 0.499004338 |
| 210125_s_at | 0.212119035 | 3.301239735 | 0.001642979 | 0.007739858 |
| 210126_at   | -0.01123409 | -0.21749813 | 0.828576137 | 0.90486572  |
| 210127_at   | -0.23731884 | -4.89900401 | 7.96E-06    | 8.83E-05    |
| 210128_s_at | -0.02308685 | -0.65292689 | 0.516358378 | 0.686236699 |
| 210129_s_at | 0.10296826  | 2.104037884 | 0.039678375 | 0.106211424 |
| 210130_s_at | -0.07916579 | -1.55202988 | 0.126042631 | 0.259302948 |
| 210131_x_at | 0.017409612 | 0.269555992 | 0.788449331 | 0.879263836 |
| 210132_at   | -0.29719513 | -5.24021882 | 2.29E-06    | 3.17E-05    |
| 210133_at   | -0.07515809 | -1.63305498 | 0.107822793 | 0.230510226 |
| 210134_x_at | 0.055906715 | 1.525892332 | 0.132419308 | 0.268774119 |
| 210135_s_at | 0.09139927  | 2.420103681 | 0.018638285 | 0.058169152 |
| 210136_at   | 0.659440587 | 4.362932691 | 5.28E-05    | 0.000431596 |
| 210137_s_at | 0.146818846 | 3.386986324 | 0.001268017 | 0.006214519 |
| 210138_at   | -0.64519799 | -5.28104012 | 1.97E-06    | 2.80E-05    |
| 210139_s_at | 0.244101475 | 2.39320177  | 0.019926853 | 0.061409657 |
| 210140_at   | 0.036090156 | 1.034661845 | 0.30508035  | 0.485060236 |
| 210141_s_at | -0.17267259 | -3.29846474 | 0.00165671  | 0.007789759 |
| 210142_x_at | -0.03022761 | -0.6727751  | 0.503736367 | 0.675847291 |
| 210143_at   | -0.06703312 | -1.15583544 | 0.252441988 | 0.425414922 |
| 210144_at   | 0.058867078 | 1.305223275 | 0.196921562 | 0.357800482 |
| 210145_at   | 0.045545518 | 0.917582019 | 0.362601086 | 0.545747406 |
| 210146_x_at | 0.031729296 | 1.613808298 | 0.111944716 | 0.236986615 |
| 210147_at   | -0.00825585 | -0.16091299 | 0.872715712 | 0.931402488 |
| 210148_at   | 0.041663555 | 0.63688833  | 0.526679309 | 0.694916472 |
| 210149_s_at | -0.37683014 | -4.44448574 | 3.98E-05    | 0.000340817 |
| 210150_s_at | 0.169351465 | 4.52380236  | 3.02E-05    | 0.000269852 |
| 210151_s_at | 0.147065024 | 3.370811701 | 0.001331893 | 0.006484905 |
| 210152_at   | 0.027978697 | 0.965368024 | 0.338329963 | 0.521078045 |
| 210153_s_at | -0.1494606  | -3.28754524 | 0.001711795 | 0.008004139 |
| 210154_at   | -0.21046982 | -3.84520207 | 0.000299451 | 0.001860049 |
| 210155_at   | -0.01615347 | -0.3218292  | 0.74872798  | 0.855104388 |
| 210156_s_at | -0.62587459 | -4.88073597 | 8.50E-06    | 9.33E-05    |
| 210157_at   | 0.030623393 | 0.912424889 | 0.365285792 | 0.548579489 |
| 210158_at   | 0.006436863 | 0.12441445  | 0.901413177 | 0.947525876 |
| 210159_s_at | 0.068523977 | 1.460707894 | 0.149439918 | 0.293430376 |
| 210160_at   | -0.07342388 | -1.63642107 | 0.107114725 | 0.229259889 |
| 210161_at   | 0.015240611 | 0.340589801 | 0.734631126 | 0.845493148 |
| 210162_s_at | 0.132326367 | 3.152534966 | 0.002552033 | 0.011194481 |
| 210163_at   | -0.08654291 | -1.67471478 | 0.099322625 | 0.216490771 |
| 210164_at   | -0.01648704 | -0.55739615 | 0.579381025 | 0.736032937 |
| 210165_at   | -0.0256518  | 0.875785865 | 0.384724318 | 0.567330954 |
| 210166_at   | 0.285499436 | 4.433147838 | 4.14E-05    | 0.000351804 |
| 210167_s_at | -0.20059568 | -4.29143499 | 6.75E-05    | 0.000528613 |
| 210168_at   | 0.079589995 | 1.153841831 | 0.253251989 | 0.426196778 |
| 210169_at   | -0.23782023 | -2.26773533 | 0.027049664 | 0.078378084 |
| 210170_at   | 0.107194593 | 3.465797186 | 0.000996161 | 0.005077604 |
| 210171_s_at | -0.0221325  | -0.998349   | 0.322217247 | 0.504110523 |
| 210172_at   | 0.68682058  | 5.19114284  | 2.75E-06    | 3.67E-05    |
| 210173_at   | -0.0286941  | -1.13025103 | 0.262978087 | 0.437630946 |
| 210174_at   | -0.01061372 | -0.44394544 | 0.658718014 | 0.793729455 |
| 210175_at   | -0.02068879 | -0.45597527 | 0.650094079 | 0.788037861 |
| 210176_at   | -0.0258802  | -0.84067871 | 0.403947162 | 0.586276315 |
| 210177_at   | -0.02461652 | -0.70437898 | 0.483988364 | 0.658961401 |
| 210178_x_at | -0.06145177 | -0.85606847 | 0.395448933 | 0.578091186 |
| 210179_at   | 0.02724198  | 0.504177097 | 0.61602846  | 0.763810347 |
| 210180_s_at | 0.070380631 | 1.861272477 | 0.067726893 | 0.161682083 |
| 210181_s_at | -0.2906121  | -5.31396128 | 1.75E-06    | 2.54E-05    |
| 210182_at   | -0.31279989 | -4.12367107 | 0.000119213 | 0.00085547  |
| 210183_x_at | 0.236835805 | 4.902291733 | 7.86E-06    | 8.74E-05    |
| 210184_at   | -0.04411637 | -0.86376339 | 0.391241666 | 0.574043747 |
| 210185_at   | -0.24776767 | -5.1728875  | 2.94E-06    | 3.88E-05    |
| 210186_s_at | -0.94102337 | -7.16400024 | 1.48E-09    | 1.20E-07    |
| 210187_at   | -0.04163143 | -1.62494254 | 0.109544902 | 0.233210155 |
| 210188_at   | -0.0006849  | -0.01922633 | 0.984725909 | 0.992677637 |
| 210189_at   | 0.054565965 | 0.844243203 | 0.401968931 | 0.58428348  |
| 210190_at   | -0.00095705 | -0.03102384 | 0.975356009 | 0.987531111 |

|             |             |             |             |             |
|-------------|-------------|-------------|-------------|-------------|
| 210191_s_at | -0.10568016 | -1.94632214 | 0.056418544 | 0.140228995 |
| 210192_at   | -0.23256756 | -3.58576623 | 0.000686012 | 0.003733016 |
| 210193_at   | 0.231808952 | 2.036100494 | 0.046271108 | 0.120131773 |
| 210194_at   | -0.01937804 | -1.08085284 | 0.284193328 | 0.461621613 |
| 210195_s_at | 0.043570881 | 1.21326533  | 0.229899092 | 0.397795123 |
| 210196_s_at | -0.00402974 | -0.21297134 | 0.832088902 | 0.907216638 |
| 210197_at   | 0.098469898 | 2.117344556 | 0.038487463 | 0.103688089 |
| 210198_s_at | 0.132589086 | 2.187050918 | 0.032744988 | 0.091345049 |
| 210199_at   | -0.01832345 | -0.3883709  | 0.699149794 | 0.822035795 |
| 210200_at   | 0.042337488 | 1.230862442 | 0.22329471  | 0.390464323 |
| 210201_x_at | 0.305395877 | 3.889387255 | 0.000259274 | 0.001643146 |
| 210202_s_at | 0.285572803 | 3.117351485 | 0.002827487 | 0.012223453 |
| 210203_at   | 0.048776859 | 2.186485587 | 0.032788357 | 0.091437492 |
| 210204_s_at | -0.01193711 | -0.37466867 | 0.709260178 | 0.828989739 |
| 210205_at   | 0.042883131 | 1.212889511 | 0.230041679 | 0.397980209 |
| 210206_s_at | 0.034495708 | 1.004152787 | 0.319435847 | 0.500995338 |
| 210208_x_at | -0.14745692 | -3.16449526 | 0.002464275 | 0.010861278 |
| 210210_at   | 0.149561359 | 4.240963735 | 8.02E-05    | 0.000611594 |
| 210211_s_at | 0.044308039 | 0.546851755 | 0.586558233 | 0.741527811 |
| 210212_x_at | 0.114172862 | 1.877934291 | 0.065371844 | 0.157337414 |
| 210213_s_at | 0.014238975 | 0.393096954 | 0.695675155 | 0.819805247 |
| 210214_s_at | -0.13440055 | -2.23862007 | 0.028994952 | 0.08289027  |
| 210215_at   | -0.09075644 | -2.30352745 | 0.024817225 | 0.073288506 |
| 210216_x_at | -0.11249497 | -3.06574714 | 0.003282229 | 0.013854303 |
| 210218_s_at | 0.005588105 | 0.185308792 | 0.853627113 | 0.919821928 |
| 210219_at   | -0.01359217 | -0.33568994 | 0.738304301 | 0.848146613 |
| 210220_at   | -0.06898224 | -1.17268562 | 0.245669701 | 0.417058052 |
| 210221_at   | -0.14931768 | -2.11911871 | 0.038331059 | 0.103353949 |
| 210222_s_at | -0.62723025 | -4.90690509 | 7.73E-06    | 8.63E-05    |
| 210223_s_at | -0.06289453 | -1.20216592 | 0.234137467 | 0.403005395 |
| 210224_at   | 0.069890289 | 1.675538221 | 0.099160304 | 0.216179137 |
| 210225_x_at | 0.06737772  | 1.305065885 | 0.1969748   | 0.357868116 |
| 210226_at   | 0.027694252 | 0.812627201 | 0.419722899 | 0.60189571  |
| 210227_at   | -0.7544461  | -7.05472449 | 2.26E-09    | 1.59E-07    |
| 210228_at   | 0.025850354 | 0.776618135 | 0.44050948  | 0.62092957  |
| 210229_s_at | 0.046259798 | 1.298716376 | 0.199131599 | 0.360628472 |
| 210230_at   | 0.266876508 | 2.998780356 | 0.00397447  | 0.01631102  |
| 210231_x_at | 0.078639782 | 2.021041322 | 0.047854423 | 0.12320467  |
| 210232_at   | -0.23512197 | -2.84903525 | 0.006042094 | 0.023033886 |
| 210233_at   | -0.00766331 | -0.34814514 | 0.728979478 | 0.84188243  |
| 210234_at   | -0.15935148 | -3.15855032 | 0.002507536 | 0.011023685 |
| 210235_s_at | 0.189270298 | 2.70515829  | 0.008926388 | 0.031813248 |
| 210236_at   | 0.020918006 | 0.737601398 | 0.463701798 | 0.64152231  |
| 210237_at   | -0.01299539 | -0.23595452 | 0.814291175 | 0.895924349 |
| 210239_at   | 0.127393481 | 2.646468534 | 0.010429861 | 0.03606711  |
| 210240_s_at | -0.54366354 | -7.37158131 | 6.60E-10    | 7.05E-08    |
| 210241_s_at | 0.044789247 | 1.374447829 | 0.174539372 | 0.328620012 |
| 210242_x_at | 0.033631648 | 0.839070451 | 0.404841668 | 0.587164377 |
| 210243_s_at | -0.18962917 | -3.75783377 | 0.000397182 | 0.002357665 |
| 210244_at   | -0.0272401  | -0.7114537  | 0.479627366 | 0.655039306 |
| 210245_at   | -0.04421177 | -0.85358365 | 0.396813501 | 0.579234091 |
| 210246_s_at | -0.12708101 | -2.42373569 | 0.018470169 | 0.057748879 |
| 210247_at   | -0.44738706 | -4.94424063 | 6.76E-06    | 7.74E-05    |
| 210248_at   | -0.00107219 | -0.02968745 | 0.976417258 | 0.988219005 |
| 210249_s_at | -0.06985671 | -2.184567   | 0.032935914 | 0.091774543 |
| 210250_x_at | -0.13682448 | -2.296185   | 0.025261375 | 0.074319096 |
| 210251_s_at | -0.20880999 | -1.81264187 | 0.075013348 | 0.174663778 |
| 210252_s_at | 0.033422228 | 0.921094083 | 0.360780044 | 0.543870962 |
| 210253_at   | 0.083600646 | 1.778970337 | 0.080434251 | 0.184536322 |
| 210254_at   | -0.02180456 | -0.93080319 | 0.355776459 | 0.538845342 |
| 210255_at   | 0.050728613 | 1.581896452 | 0.119059133 | 0.248030147 |
| 210256_s_at | -0.02777892 | -0.91427336 | 0.364322053 | 0.547598075 |
| 210257_x_at | -0.0904989  | -2.35232963 | 0.022037479 | 0.066628264 |
| 210258_at   | -0.03981711 | -1.98363361 | 0.051990854 | 0.131475995 |
| 210259_s_at | -0.05915809 | -1.07020467 | 0.288918037 | 0.467160815 |
| 210260_s_at | 0.209193531 | 4.609789163 | 2.23E-05    | 0.000209483 |
| 210261_at   | -0.38515337 | -7.12572634 | 1.72E-09    | 1.31E-07    |
| 210262_at   | -0.01460678 | -0.48114666 | 0.63220505  | 0.775587639 |
| 210263_at   | -0.53266013 | -7.88769767 | 8.88E-11    | 1.97E-08    |
| 210264_at   | 0.102733158 | 2.472518029 | 0.016340484 | 0.052178402 |
| 210265_x_at | -0.01015218 | -0.32321448 | 0.747684051 | 0.854506984 |
| 210266_s_at | -0.03083004 | -0.47529351 | 0.636345672 | 0.778432321 |
| 210267_at   | -0.0043862  | -0.10871784 | 0.913797921 | 0.954246988 |
| 210268_at   | 0.088170033 | 2.374804169 | 0.02085343  | 0.06371216  |
| 210269_s_at | 0.093208471 | 2.469856847 | 0.016450697 | 0.052466606 |

|             |             |             |             |             |
|-------------|-------------|-------------|-------------|-------------|
| 210270_at   | 0.034453371 | 0.811068331 | 0.42061035  | 0.602592399 |
| 210271_at   | 0.01932194  | 0.401517541 | 0.689500511 | 0.815086411 |
| 210272_at   | 0.054834854 | 1.367156769 | 0.176800828 | 0.331678739 |
| 210273_at   | -0.30246893 | -5.26563863 | 2.09E-06    | 2.94E-05    |
| 210274_at   | -0.02878693 | -0.78529554 | 0.43544571  | 0.616047473 |
| 210275_s_at | -0.0417267  | -0.64616804 | 0.520694599 | 0.689671122 |
| 210276_s_at | 0.323733582 | 5.164329489 | 3.03E-06    | 3.99E-05    |
| 210277_at   | -0.18114552 | -5.87421852 | 2.13E-07    | 4.54E-06    |
| 210278_s_at | -0.18641051 | -4.47334287 | 3.60E-05    | 0.000313371 |
| 210279_at   | 0.005482647 | 0.214631434 | 0.830800278 | 0.906298079 |
| 210280_at   | -0.04816858 | -0.94300501 | 0.34955224  | 0.532639197 |
| 210281_s_at | 0.176169273 | 3.087065235 | 0.003086657 | 0.013159294 |
| 210282_at   | 0.231364613 | 3.487848832 | 0.000930624 | 0.004801042 |
| 210283_x_at | 0.051954892 | 0.724198516 | 0.471826995 | 0.648103957 |
| 210284_s_at | -0.09521777 | -1.29118051 | 0.201714295 | 0.363993026 |
| 210285_x_at | -0.16474249 | -2.02961622 | 0.04694723  | 0.121428647 |
| 210286_s_at | -0.00835482 | -0.45636641 | 0.649814474 | 0.787857368 |
| 210287_s_at | -0.03338968 | -1.0071995  | 0.317982214 | 0.499236321 |
| 210288_at   | 0.05393657  | 1.366989454 | 0.176852986 | 0.331748736 |
| 210289_at   | 0.05938901  | 2.26107209  | 0.027484367 | 0.079339318 |
| 210290_at   | -0.03327719 | -1.1936856  | 0.237413793 | 0.40685509  |
| 210291_s_at | -0.03361009 | -0.8016121  | 0.426017878 | 0.607394744 |
| 210292_s_at | -0.74028438 | -5.384632   | 1.34E-06    | 2.03E-05    |
| 210293_s_at | 0.059244959 | 1.056364486 | 0.295139828 | 0.473997662 |
| 210294_at   | -0.03447894 | -1.01007009 | 0.316616682 | 0.497791907 |
| 210295_at   | -0.00229197 | -0.06337697 | 0.949682143 | 0.974172572 |
| 210296_s_at | 0.058477337 | 0.752397686 | 0.454825442 | 0.633834071 |
| 210297_s_at | 0.003929025 | 0.201613567 | 0.840917478 | 0.912523587 |
| 210298_x_at | -0.30110197 | -2.13444918 | 0.037002501 | 0.100546791 |
| 210299_s_at | -0.07744759 | -0.68157729 | 0.498192745 | 0.6712178   |
| 210300_at   | -0.02513991 | -0.57727921 | 0.565963504 | 0.726308974 |
| 210301_at   | -0.04190461 | -0.64407938 | 0.522038487 | 0.690939203 |
| 210302_s_at | -0.01758183 | -0.43677778 | 0.663878682 | 0.797196681 |
| 210303_at   | -0.00346529 | -0.13018063 | 0.896869626 | 0.94468844  |
| 210304_at   | 0.04600609  | 1.420781904 | 0.160682647 | 0.309295755 |
| 210305_at   | -0.02103243 | -0.27047417 | 0.787746389 | 0.878827451 |
| 210306_at   | 0.145420536 | 2.924800563 | 0.004895955 | 0.019387739 |
| 210307_s_at | -0.01708572 | -0.39768151 | 0.692310797 | 0.817349204 |
| 210309_at   | -0.07403453 | -1.66827031 | 0.100600526 | 0.218575879 |
| 210310_s_at | 0.000405183 | 0.007504405 | 0.994037911 | 0.997248681 |
| 210311_at   | 0.036562462 | 0.880362822 | 0.382261163 | 0.565017227 |
| 210312_s_at | 0.184210961 | 3.79854686  | 0.000348341 | 0.002108635 |
| 210313_at   | 0.00061344  | 0.011547247 | 0.990826081 | 0.995691072 |
| 210314_x_at | 0.13651396  | 1.977528278 | 0.052694298 | 0.132863954 |
| 210315_at   | -0.90064514 | -6.26544434 | 4.79E-08    | 1.42E-06    |
| 210316_at   | -0.05005161 | -1.74628662 | 0.086004475 | 0.194195523 |
| 210317_s_at | -0.55874992 | -4.19383236 | 9.41E-05    | 0.00069902  |
| 210318_at   | -0.01673036 | -0.41469325 | 0.679881591 | 0.808135114 |
| 210319_x_at | 0.012883617 | 0.617856803 | 0.539064968 | 0.705025622 |
| 210320_s_at | 0.029415694 | 0.954475039 | 0.343766356 | 0.526583698 |
| 210321_at   | -0.03181638 | -0.66610627 | 0.507958542 | 0.679121789 |
| 210322_x_at | 0.034269426 | 1.155819349 | 0.252448518 | 0.425414922 |
| 210323_at   | 0.210424656 | 3.342603107 | 0.001450637 | 0.006970113 |
| 210324_at   | -0.0104107  | -0.34422298 | 0.731911527 | 0.843578243 |
| 210325_at   | 0.023994831 | 0.416397172 | 0.678641492 | 0.807439383 |
| 210326_at   | -0.05846827 | -0.95935671 | 0.341323009 | 0.524242488 |
| 210327_s_at | -0.00323746 | -0.11534095 | 0.908569441 | 0.951623751 |
| 210328_at   | -0.02727136 | -0.49692273 | 0.621103832 | 0.767280677 |
| 210329_s_at | 0.021984433 | 0.5184423   | 0.606103009 | 0.755971079 |
| 210330_at   | 0.001437788 | 0.064130392 | 0.949084793 | 0.97388294  |
| 210331_at   | -0.05288907 | -1.12542891 | 0.264998307 | 0.439978755 |
| 210332_at   | -0.05174899 | -0.81561068 | 0.418027582 | 0.600459291 |
| 210333_at   | 0.046822708 | 0.970608651 | 0.335734791 | 0.518564344 |
| 210334_x_at | 0.036474559 | 0.953707035 | 0.344151794 | 0.526946285 |
| 210335_at   | 0.126665505 | 2.482362408 | 0.01593854  | 0.051150741 |
| 210336_x_at | -0.01756187 | -0.5290044  | 0.598801727 | 0.750743584 |
| 210337_s_at | -0.41548095 | -4.80555249 | 1.11E-05    | 0.000116652 |
| 210338_s_at | -0.35741121 | -2.56783339 | 0.012806493 | 0.042671124 |
| 210339_s_at | 0.019795599 | 0.592610907 | 0.555722893 | 0.718042371 |
| 210340_s_at | -0.00040483 | -0.00843164 | 0.993301262 | 0.997061131 |
| 210341_at   | 0.019848373 | 0.705745165 | 0.483144503 | 0.658213509 |
| 210342_s_at | -0.02865909 | -0.76370042 | 0.448111531 | 0.627656676 |
| 210343_s_at | -0.00057075 | -0.01038113 | 0.991752486 | 0.996181437 |
| 210344_at   | 0.030413839 | 0.83109753  | 0.409294093 | 0.591481977 |
| 210345_s_at | 0.130593819 | 2.40426231  | 0.019387707 | 0.060117629 |

|             |             |             |             |             |
|-------------|-------------|-------------|-------------|-------------|
| 210346_s_at | 0.070764417 | 1.070761802 | 0.288669494 | 0.466843388 |
| 210347_s_at | -0.97426113 | -8.38745097 | 1.28E-11    | 6.24E-09    |
| 210348_at   | 0.103687826 | 2.240420585 | 0.028871163 | 0.082595701 |
| 210349_at   | -0.40416624 | -7.18675024 | 1.36E-09    | 1.14E-07    |
| 210350_x_at | -0.01517943 | -0.5360523  | 0.593952585 | 0.747113113 |
| 210352_at   | -0.02662535 | -0.50284866 | 0.61695648  | 0.764451995 |
| 210353_s_at | 0.037728602 | 1.176020532 | 0.244344996 | 0.41543691  |
| 210354_at   | -0.04605563 | -1.29104943 | 0.201759439 | 0.364035517 |
| 210355_at   | -0.05308715 | -2.65038496 | 0.010322751 | 0.035774223 |
| 210356_x_at | 0.004295676 | 0.078423662 | 0.937758386 | 0.96750215  |
| 210357_s_at | 0.361801583 | 5.593169603 | 6.17E-07    | 1.07E-05    |
| 210358_x_at | 0.007707569 | 0.177166681 | 0.859988762 | 0.923668024 |
| 210359_at   | -0.12767972 | -3.51586427 | 0.000853258 | 0.004461659 |
| 210360_s_at | -0.0361927  | -0.92769577 | 0.357372961 | 0.540443014 |
| 210361_s_at | 0.07886779  | 2.506431719 | 0.01499309  | 0.048573481 |
| 210362_x_at | -0.01492028 | -0.49602556 | 0.621732816 | 0.767626418 |
| 210363_s_at | -0.55436789 | -6.38247145 | 3.06E-08    | 1.01E-06    |
| 210364_at   | -0.3607453  | -5.91124041 | 1.85E-07    | 4.07E-06    |
| 210365_at   | -0.00397997 | -0.07138946 | 0.943331026 | 0.970787285 |
| 210366_at   | 0.025023021 | 1.054820264 | 0.295839693 | 0.474711603 |
| 210367_s_at | 0.100078111 | 2.177691215 | 0.033469529 | 0.092902316 |
| 210368_at   | 0.173476553 | 4.945993058 | 6.71E-06    | 7.69E-05    |
| 210369_at   | 0.042882271 | 0.941166846 | 0.350485334 | 0.533638488 |
| 210370_s_at | 0.053468629 | 0.855642269 | 0.395682781 | 0.578338452 |
| 210371_s_at | 0.076633926 | 0.863915684 | 0.391158682 | 0.57397852  |
| 210372_s_at | -0.54244327 | -5.01683742 | 5.19E-06    | 6.21E-05    |
| 210373_at   | -0.02341752 | -0.43959827 | 0.661845975 | 0.795773338 |
| 210374_x_at | -0.026192   | -0.64981492 | 0.518352514 | 0.687837549 |
| 210375_at   | -0.01125064 | -0.71659319 | 0.476473127 | 0.652286252 |
| 210376_x_at | -0.32804137 | -4.83580341 | 9.99E-06    | 0.000106765 |
| 210377_at   | -0.01420636 | -0.3389306  | 0.735874255 | 0.846421109 |
| 210378_s_at | 0.024486317 | 0.654669732 | 0.515243362 | 0.685566026 |
| 210379_s_at | -0.10151938 | -2.58791066 | 0.012156945 | 0.040915594 |
| 210380_s_at | 0.029687829 | 0.852129082 | 0.397613645 | 0.5799657   |
| 210381_s_at | -0.23047837 | -4.15034065 | 0.000108976 | 0.000792054 |
| 210382_at   | 0.020452312 | 0.555526958 | 0.580650232 | 0.737042871 |
| 210383_at   | -0.40886982 | -4.82493838 | 1.04E-05    | 0.000110166 |
| 210384_at   | 0.015887738 | 0.548458602 | 0.585461781 | 0.740804956 |
| 210385_s_at | 0.013714702 | 0.446537042 | 0.656856156 | 0.792297726 |
| 210386_s_at | 0.086957353 | 2.087722859 | 0.041182197 | 0.109424181 |
| 210387_at   | 0.136119322 | 2.146456469 | 0.035990194 | 0.098407694 |
| 210388_at   | 0.018471717 | 0.658325746 | 0.512908526 | 0.683618614 |
| 210389_x_at | 0.083449753 | 2.642983142 | 0.010526034 | 0.03634033  |
| 210390_s_at | 0.027250971 | 1.015815099 | 0.31389567  | 0.494964797 |
| 210391_at   | 0.034524878 | 0.916689912 | 0.363064591 | 0.546222404 |
| 210392_x_at | -0.00228037 | -0.06145483 | 0.951206229 | 0.975105834 |
| 210393_at   | 0.035166515 | 0.713083345 | 0.478625947 | 0.654131398 |
| 210394_x_at | -0.02859797 | -0.60442847 | 0.547893328 | 0.71122274  |
| 210395_x_at | -0.00046849 | -0.01430493 | 0.988635328 | 0.994778686 |
| 210396_s_at | -0.12151664 | -1.26439323 | 0.21109769  | 0.376013442 |
| 210397_at   | 0.00428412  | 0.095998708 | 0.923849336 | 0.960185392 |
| 210398_x_at | 0.008341074 | 0.253787041 | 0.800548939 | 0.887288476 |
| 210399_x_at | -0.01450008 | -0.3929378  | 0.695792059 | 0.819899774 |
| 210400_at   | 0.219888412 | 3.812210153 | 0.000333282 | 0.002033728 |
| 210401_at   | -0.00301558 | -0.06872873 | 0.945439669 | 0.971908497 |
| 210402_at   | -0.11960545 | -2.92324912 | 0.004917249 | 0.019451381 |
| 210403_s_at | -0.10632611 | -1.78453092 | 0.079517152 | 0.182784688 |
| 210404_x_at | -1.0250965  | -6.55281066 | 1.58E-08    | 6.26E-07    |
| 210405_x_at | 0.143529687 | 3.747208128 | 0.000410971 | 0.002428227 |
| 210406_s_at | -0.35394839 | -4.13837941 | 0.000113457 | 0.000819298 |
| 210407_at   | 0.146278788 | 2.917716262 | 0.004993892 | 0.019698766 |
| 210408_s_at | -0.21406819 | -2.44752475 | 0.017402295 | 0.055026415 |
| 210409_at   | 0.12090416  | 2.534197316 | 0.0139656   | 0.045792415 |
| 210410_s_at | 0.060228986 | 1.844305444 | 0.070198247 | 0.166029851 |
| 210411_s_at | -0.01268863 | -0.2948141  | 0.769178434 | 0.867842836 |
| 210412_at   | -0.05134888 | -1.48240525 | 0.143593685 | 0.285095023 |
| 210413_x_at | -0.08503019 | -1.56563326 | 0.122822267 | 0.254032213 |
| 210414_at   | -0.1514724  | -3.03536124 | 0.003581066 | 0.014919828 |
| 210415_s_at | 0.108036752 | 2.731233348 | 0.008324397 | 0.030056062 |
| 210416_s_at | -0.01279346 | -0.29023882 | 0.772658746 | 0.869852744 |
| 210417_s_at | 0.045360691 | 0.981419045 | 0.330423094 | 0.512966128 |
| 210418_s_at | -0.18350754 | -2.53161615 | 0.014058358 | 0.046040295 |
| 210419_at   | 0.048041286 | 1.087298273 | 0.281359618 | 0.458639526 |
| 210420_at   | -0.01470631 | -0.60906838 | 0.544834579 | 0.709140198 |
| 210421_s_at | 0.03643507  | 1.306008618 | 0.196656075 | 0.357463427 |

|             |             |             |             |             |
|-------------|-------------|-------------|-------------|-------------|
| 210422_x_at | -0.01198572 | -0.28342559 | 0.777850106 | 0.872582252 |
| 210423_s_at | 0.202052033 | 3.68659136  | 0.000498831 | 0.002859274 |
| 210424_s_at | -0.16569937 | -3.24589582 | 0.001938172 | 0.008876898 |
| 210425_x_at | -0.47650261 | -3.95253384 | 0.000210736 | 0.00137659  |
| 210426_x_at | 0.059988323 | 1.048141817 | 0.298879585 | 0.478096082 |
| 210427_x_at | 0.533772063 | 4.309744536 | 6.34E-05    | 0.000501399 |
| 210428_s_at | 0.022086368 | 0.561521054 | 0.576584892 | 0.733817405 |
| 210429_at   | -0.00151165 | -0.06472091 | 0.948616623 | 0.973627237 |
| 210430_x_at | 0.019257502 | 0.475142196 | 0.636452871 | 0.778432321 |
| 210431_at   | 0.002359746 | 0.049295102 | 0.960851853 | 0.980110562 |
| 210432_s_at | -1.02335042 | -5.83070708 | 2.52E-07    | 5.19E-06    |
| 210433_at   | 0.046960689 | 1.712348715 | 0.092122987 | 0.204579406 |
| 210434_x_at | -0.11358257 | -2.45003543 | 0.017292895 | 0.054726955 |
| 210435_at   | -0.00362094 | -0.11730754 | 0.907017726 | 0.950619995 |
| 210436_at   | 0.018404817 | 0.521923428 | 0.60369209  | 0.754387941 |
| 210437_at   | 0.035822966 | 1.11338057  | 0.270093813 | 0.445811252 |
| 210438_x_at | 0.378895787 | 6.814034133 | 5.76E-09    | 3.05E-07    |
| 210439_at   | 0.044922254 | 1.492352617 | 0.140974283 | 0.281381924 |
| 210440_s_at | -0.08424246 | -1.90714704 | 0.061409943 | 0.149761715 |
| 210441_at   | 0.011873913 | 0.347663322 | 0.72933945  | 0.84209049  |
| 210442_at   | 0.008986368 | 0.206085416 | 0.837438924 | 0.910318149 |
| 210443_x_at | -0.01827768 | -0.55523937 | 0.580845629 | 0.737086836 |
| 210444_at   | -0.04101193 | -0.69404679 | 0.490396771 | 0.664617961 |
| 210445_at   | -0.32276894 | -4.78168035 | 1.21E-05    | 0.000125204 |
| 210446_at   | 0.026838955 | 0.574133733 | 0.568075917 | 0.727458971 |
| 210447_at   | -0.02656942 | -1.28619149 | 0.203437866 | 0.366289787 |
| 210448_s_at | -0.38655362 | -5.59969704 | 6.02E-07    | 1.05E-05    |
| 210449_x_at | -0.08220635 | -2.1091837  | 0.039214087 | 0.105157564 |
| 210450_at   | -0.01027863 | -0.52269157 | 0.603160696 | 0.753963523 |
| 210451_at   | 0.048351963 | 0.967860231 | 0.337094173 | 0.519837575 |
| 210452_x_at | 0.01555487  | 0.364007919 | 0.717162962 | 0.834412348 |
| 210453_x_at | -0.30807005 | -3.94679282 | 0.000214759 | 0.001399739 |
| 210454_s_at | 0.011215614 | 0.281281633 | 0.779485816 | 0.87386881  |
| 210455_at   | 0.01033446  | 0.481273268 | 0.632115617 | 0.775516393 |
| 210456_at   | 0.028544985 | 0.784061931 | 0.436163483 | 0.61667458  |
| 210457_x_at | -0.1357878  | -3.44743224 | 0.001054063 | 0.005325365 |
| 210458_s_at | -0.02556235 | -1.23835283 | 0.220526126 | 0.387471763 |
| 210459_at   | 0.045057674 | 0.817796567 | 0.416788114 | 0.599115319 |
| 210460_s_at | -0.07354172 | -1.16870644 | 0.247257077 | 0.419022635 |
| 210461_s_at | 0.074237141 | 1.600804826 | 0.11480107  | 0.241512399 |
| 210462_at   | -0.02584976 | -0.85844153 | 0.394148462 | 0.57686937  |
| 210463_x_at | 0.076779872 | 1.917513489 | 0.060053923 | 0.147153348 |
| 210464_at   | 0.02340021  | 1.210114612 | 0.231096483 | 0.399279547 |
| 210465_s_at | -0.188123   | -3.21871148 | 0.002100824 | 0.009496313 |
| 210466_s_at | 0.084680746 | 2.233169151 | 0.029372573 | 0.083701848 |
| 210467_x_at | -0.0029206  | -0.09596128 | 0.923878933 | 0.960185392 |
| 210469_at   | 0.076729289 | 2.306371395 | 0.024647065 | 0.072871568 |
| 210470_x_at | -0.1025284  | -2.30484772 | 0.024738101 | 0.073102036 |
| 210471_s_at | -1.59504038 | -8.65852115 | 4.51E-12    | 4.01E-09    |
| 210472_at   | 0.064948615 | 1.612936477 | 0.112134405 | 0.237253744 |
| 210473_s_at | 0.630137247 | 5.789162393 | 2.95E-07    | 5.89E-06    |
| 210474_s_at | 0.056577918 | 1.251400229 | 0.215764018 | 0.381761965 |
| 210475_at   | -0.29062444 | -4.9470504  | 6.69E-06    | 7.67E-05    |
| 210476_s_at | 0.043941653 | 1.000207484 | 0.321324831 | 0.50315859  |
| 210477_x_at | -0.09858061 | -1.99963942 | 0.050184839 | 0.127814344 |
| 210479_s_at | 0.061361286 | 1.460298542 | 0.14955198  | 0.293611795 |
| 210480_s_at | 0.057718905 | 0.861267392 | 0.392603313 | 0.575399333 |
| 210481_s_at | -0.06131384 | -1.29022697 | 0.202042871 | 0.364438794 |
| 210482_x_at | -0.12080744 | -3.62167221 | 0.000612748 | 0.003397328 |
| 210483_at   | -0.04644526 | -0.81455533 | 0.418626797 | 0.601099295 |
| 210484_s_at | -0.07367926 | -1.00623716 | 0.318440877 | 0.499769696 |
| 210486_at   | 0.089403835 | 2.535664404 | 0.013913126 | 0.045643795 |
| 210487_at   | 0.003626765 | 0.128721617 | 0.898018955 | 0.945420644 |
| 210491_at   | -0.00896012 | -0.47473123 | 0.636744057 | 0.778597856 |
| 210492_at   | 0.065568741 | 2.162043185 | 0.034712295 | 0.095662694 |
| 210493_s_at | 0.12380133  | 2.466012457 | 0.016611095 | 0.052910203 |
| 210495_x_at | 0.16879777  | 1.577209406 | 0.120134037 | 0.249722344 |
| 210496_at   | -0.02036354 | -0.77359034 | 0.442284495 | 0.622608626 |
| 210497_x_at | 0.018971639 | 0.442976703 | 0.65941453  | 0.794066434 |
| 210498_at   | 0.000484189 | 0.023823783 | 0.981074156 | 0.990470909 |
| 210499_s_at | 0.021335149 | 0.459399331 | 0.647648135 | 0.786241388 |
| 210500_at   | 0.013934404 | 0.470329467 | 0.639866488 | 0.781079993 |
| 210501_x_at | -0.15040141 | -3.11582001 | 0.002840088 | 0.012271991 |
| 210502_s_at | 0.100345899 | 2.289835459 | 0.025651139 | 0.075218207 |
| 210503_at   | -0.02664363 | -1.07221283 | 0.288022865 | 0.46618564  |

|             |             |             |             |             |
|-------------|-------------|-------------|-------------|-------------|
| 210504_at   | 0.021427963 | 0.586617949 | 0.559714751 | 0.721323326 |
| 210505_at   | -0.00318741 | -0.09491701 | 0.92470476  | 0.960554693 |
| 210506_at   | -0.05238282 | -1.27122503 | 0.208674335 | 0.372849054 |
| 210507_s_at | -0.08457602 | -1.73363058 | 0.088245617 | 0.198000468 |
| 210508_s_at | -0.03951457 | -0.8601729  | 0.393201323 | 0.575954689 |
| 210510_s_at | 0.03892472  | 0.788200654 | 0.433758131 | 0.614540557 |
| 210511_s_at | -0.37047959 | -4.9403936  | 6.85E-06    | 7.83E-05    |
| 210512_s_at | -0.30442219 | -1.86518192 | 0.067167982 | 0.160665353 |
| 210513_s_at | -0.09653852 | -1.5451197  | 0.127704145 | 0.261697173 |
| 210514_x_at | 0.068115695 | 1.123917278 | 0.265633857 | 0.440828531 |
| 210515_at   | -0.02766839 | -0.65244325 | 0.516668024 | 0.686418871 |
| 210516_at   | -0.05034342 | -2.41044632 | 0.019091999 | 0.059373711 |
| 210517_s_at | -0.49388994 | -5.58101911 | 6.45E-07    | 1.11E-05    |
| 210518_at   | -0.32403245 | -6.38006332 | 3.08E-08    | 1.01E-06    |
| 210519_s_at | -0.25298755 | -3.09134406 | 0.00304874  | 0.013024977 |
| 210520_at   | 0.090000778 | 2.011991671 | 0.048828193 | 0.125163728 |
| 210521_s_at | 0.025541778 | 1.025789124 | 0.30920925  | 0.489781315 |
| 210523_at   | -0.06103617 | -1.12673451 | 0.26445025  | 0.439345994 |
| 210524_x_at | 0.694071002 | 6.298616088 | 4.22E-08    | 1.29E-06    |
| 210525_x_at | 0.019196513 | 1.060479045 | 0.293280603 | 0.471819422 |
| 210527_x_at | 0.016534308 | 0.461209913 | 0.646356338 | 0.785438627 |
| 210528_at   | 0.048689056 | 1.834518183 | 0.071658038 | 0.168670196 |
| 210529_s_at | -0.41315161 | -6.09566103 | 9.18E-08    | 2.36E-06    |
| 210530_s_at | 0.002970655 | 0.054073185 | 0.95706089  | 0.978025456 |
| 210531_at   | -0.03108797 | -1.51274748 | 0.135721706 | 0.273709422 |
| 210532_s_at | -0.38648611 | -7.11262677 | 1.81E-09    | 1.36E-07    |
| 210533_at   | -0.00810724 | -0.24897114 | 0.804254165 | 0.889721411 |
| 210534_s_at | -0.33441404 | -4.42259588 | 4.29E-05    | 0.000362711 |
| 210535_at   | 0.042065804 | 2.141049508 | 0.036443006 | 0.099378291 |
| 210536_s_at | -0.02945073 | -0.74158114 | 0.461304646 | 0.639572739 |
| 210537_s_at | -0.06070736 | -1.52138103 | 0.13354542  | 0.270502713 |
| 210538_s_at | 0.079435322 | 2.306522971 | 0.024638025 | 0.07285448  |
| 210539_at   | 0.115346688 | 3.5462908   | 0.000776176 | 0.004133072 |
| 210540_s_at | 0.082765892 | 2.423581055 | 0.018477299 | 0.057763532 |
| 210541_s_at | -0.02944592 | -0.63092344 | 0.530545151 | 0.697734209 |
| 210542_s_at | 0.179253011 | 2.916793017 | 0.005006788 | 0.019740259 |
| 210543_s_at | -0.18237099 | -2.98084273 | 0.004181755 | 0.017025591 |
| 210544_s_at | -0.14842112 | -2.68936354 | 0.009310174 | 0.032936775 |
| 210545_at   | -0.01209762 | -0.2318677  | 0.817449038 | 0.898006451 |
| 210546_x_at | 0.027813907 | 0.895092575 | 0.374401669 | 0.557517056 |
| 210547_x_at | -0.27716136 | -5.63225259 | 5.32E-07    | 9.54E-06    |
| 210548_at   | -0.00394738 | -0.13714848 | 0.891383841 | 0.941856849 |
| 210549_s_at | 0.04850694  | 1.695304691 | 0.095328552 | 0.209883424 |
| 210550_s_at | -0.23226062 | -3.34018593 | 0.001461265 | 0.007012441 |
| 210551_s_at | 0.003634688 | 0.116841387 | 0.907385503 | 0.95085167  |
| 210552_s_at | 0.03958136  | 1.144694276 | 0.256992437 | 0.430684941 |
| 210553_x_at | -0.04079097 | -0.92754186 | 0.357452157 | 0.54050791  |
| 210554_s_at | 0.44443232  | 7.275287355 | 9.61E-10    | 9.15E-08    |
| 210555_s_at | 0.175097323 | 3.658198837 | 0.000545912 | 0.003084437 |
| 210556_at   | 0.056729926 | 1.54632865  | 0.127412204 | 0.261206708 |
| 210557_x_at | 0.026363794 | 0.700170978 | 0.486592683 | 0.661130592 |
| 210558_at   | -0.00381792 | -0.1122307  | 0.911024277 | 0.952978153 |
| 210559_s_at | -8.87E-05   | -0.00171276 | 0.998639239 | 0.999310037 |
| 210560_at   | -0.07418083 | -2.12845553 | 0.037517053 | 0.101655884 |
| 210561_s_at | 0.233471499 | 2.824737341 | 0.00645922  | 0.024351531 |
| 210562_at   | 0.036659155 | 1.095519386 | 0.277773865 | 0.45441512  |
| 210563_x_at | 0.005016073 | 0.083580124 | 0.933675299 | 0.965474698 |
| 210564_x_at | 0.090068715 | 2.125271315 | 0.037792949 | 0.102267044 |
| 210565_at   | -0.02623156 | -0.67884772 | 0.499908262 | 0.672563896 |
| 210567_s_at | 0.003935518 | 0.139096372 | 0.889851203 | 0.941038546 |
| 210568_s_at | 0.071913303 | 2.527928931 | 0.014191831 | 0.046381083 |
| 210569_s_at | 0.034288011 | 0.680076578 | 0.499135534 | 0.671989556 |
| 210570_x_at | -0.34833397 | -7.16097559 | 1.50E-09    | 1.20E-07    |
| 210571_s_at | -0.06926664 | -1.06054152 | 0.293252436 | 0.471813588 |
| 210572_at   | 0.018648339 | 0.604774316 | 0.547665037 | 0.711110544 |
| 210573_s_at | -0.08347078 | -2.34507749 | 0.022432156 | 0.067542808 |
| 210574_s_at | 0.111522004 | 2.050917037 | 0.044757662 | 0.11700453  |
| 210575_at   | 0.000184566 | 0.007595076 | 0.993965877 | 0.997225798 |
| 210576_at   | -0.00640077 | -0.31588243 | 0.753214736 | 0.858022095 |
| 210577_at   | -0.05891363 | -0.91793299 | 0.36241884  | 0.545636611 |
| 210578_at   | 0.007698422 | 0.168794954 | 0.866539546 | 0.927824279 |
| 210579_s_at | 0.003152172 | 0.106479421 | 0.915565878 | 0.955101774 |
| 210580_x_at | 0.139735991 | 2.420859978 | 0.018603166 | 0.058079824 |
| 210581_x_at | -0.05449906 | -1.50225649 | 0.13840391  | 0.27771506  |
| 210582_s_at | 0.251021656 | 4.706274183 | 1.59E-05    | 0.000157617 |

|             |             |             |             |             |
|-------------|-------------|-------------|-------------|-------------|
| 210583_at   | -0.03578364 | -0.70163807 | 0.485683822 | 0.660485071 |
| 210584_s_at | 0.001108428 | 0.033132893 | 0.973681275 | 0.986684886 |
| 210585_s_at | -0.23869533 | -5.27979266 | 1.98E-06    | 2.81E-05    |
| 210586_x_at | 0.014839488 | 0.334186061 | 0.739432921 | 0.848899322 |
| 210587_at   | 0.023618768 | 1.211237129 | 0.230669365 | 0.398788257 |
| 210588_x_at | 0.205225284 | 3.024094334 | 0.003698185 | 0.015346266 |
| 210589_s_at | 0.065875111 | 1.651145028 | 0.10406178  | 0.224430039 |
| 210592_s_at | 0.097868254 | 1.138567681 | 0.259519505 | 0.433651601 |
| 210593_at   | -0.02573402 | -0.53766313 | 0.59284688  | 0.746197987 |
| 210594_x_at | -0.0097724  | -0.2791444  | 0.781117395 | 0.874951719 |
| 210595_at   | -0.03860306 | -0.87681551 | 0.384169335 | 0.566836314 |
| 210596_at   | 0.134286929 | 3.250116482 | 0.001914008 | 0.008788742 |
| 210597_x_at | -0.08339619 | -1.25538385 | 0.2143253   | 0.380028816 |
| 210598_at   | 0.159304718 | 3.944631461 | 0.000216293 | 0.001408093 |
| 210599_at   | 0.050485458 | 1.789296696 | 0.078738093 | 0.181333755 |
| 210600_s_at | 0.060119149 | 2.088393474 | 0.041119421 | 0.109315874 |
| 210601_at   | -0.04497103 | -1.36344214 | 0.177961566 | 0.333352543 |
| 210602_s_at | -0.11334488 | -2.34004376 | 0.022709795 | 0.068245439 |
| 210603_at   | 0.020660821 | 0.448259902 | 0.655619628 | 0.791459662 |
| 210604_at   | 0.057958255 | 1.202830737 | 0.233882014 | 0.402706694 |
| 210605_s_at | -0.05015742 | -1.15396014 | 0.25320387  | 0.426157542 |
| 210606_x_at | -0.00667246 | -0.17005531 | 0.865552715 | 0.927345302 |
| 210607_at   | 0.02414779  | 0.738466334 | 0.46318021  | 0.641099134 |
| 210608_s_at | 0.087693825 | 2.442744372 | 0.017612316 | 0.055560784 |
| 210609_s_at | 0.038349789 | 0.973483058 | 0.334316975 | 0.517107158 |
| 210610_at   | 0.076823129 | 1.807593718 | 0.075806033 | 0.176087485 |
| 210611_s_at | 0.508287998 | 2.264600582 | 0.027253407 | 0.078825349 |
| 210612_s_at | 0.487370966 | 4.135316715 | 0.000114633 | 0.000827121 |
| 210613_s_at | 0.095988568 | 2.307034715 | 0.024607526 | 0.072793194 |
| 210614_at   | -0.00916402 | -0.34914885 | 0.728229802 | 0.841374446 |
| 210615_at   | -0.03375567 | -0.77441033 | 0.441803371 | 0.6221273   |
| 210616_s_at | 0.086373673 | 2.306314456 | 0.024650462 | 0.072876789 |
| 210617_at   | 0.07149173  | 2.373329507 | 0.020929341 | 0.063900405 |
| 210618_at   | 0.058709381 | 1.086650325 | 0.281643593 | 0.458851541 |
| 210619_s_at | 0.086842743 | 1.765471272 | 0.082697348 | 0.188297833 |
| 210620_s_at | 0.018015663 | 0.594871223 | 0.554221028 | 0.716587379 |
| 210621_s_at | -0.16326298 | -1.62924625 | 0.108628553 | 0.231759311 |
| 210622_x_at | -0.14309196 | -2.91504448 | 0.005031298 | 0.019816582 |
| 210623_at   | 0.074763383 | 2.478858573 | 0.016080567 | 0.051517757 |
| 210624_s_at | 0.079748413 | 2.301969552 | 0.024910879 | 0.073510533 |
| 210625_s_at | -0.11259979 | -1.93542904 | 0.057770444 | 0.142787118 |
| 210626_at   | -0.0148984  | -0.60442037 | 0.547898678 | 0.71122274  |
| 210627_s_at | -0.0139959  | -0.47216174 | 0.63856595  | 0.780138055 |
| 210628_x_at | 0.044630282 | 0.872964466 | 0.386247643 | 0.568874068 |
| 210629_x_at | 0.072894277 | 1.992064126 | 0.051032763 | 0.129522191 |
| 210630_s_at | 0.070587186 | 2.012842776 | 0.04873589  | 0.124984473 |
| 210631_at   | 0.039415502 | 1.525602733 | 0.13249137  | 0.268881315 |
| 210632_s_at | 0.034530865 | 0.638231994 | 0.525810523 | 0.694163704 |
| 210633_x_at | -0.03370866 | -0.92694183 | 0.357761007 | 0.540791955 |
| 210634_at   | 0.010123248 | 0.289515393 | 0.773209472 | 0.870153227 |
| 210635_s_at | -0.09894191 | -2.49334341 | 0.015500725 | 0.049982568 |
| 210636_at   | 0.050429165 | 1.630648488 | 0.108331335 | 0.23132661  |
| 210637_at   | -0.10233043 | -1.80671553 | 0.075944644 | 0.176305777 |
| 210638_s_at | -0.22219334 | -4.79367111 | 1.16E-05    | 0.000120842 |
| 210639_s_at | -0.1716809  | -3.60094218 | 0.000654081 | 0.003587654 |
| 210640_s_at | 0.313110198 | 4.318635682 | 6.15E-05    | 0.000488761 |
| 210641_at   | -0.01653763 | -0.50967987 | 0.612191058 | 0.76076195  |
| 210642_at   | 0.004955242 | 0.083512103 | 0.933729149 | 0.965508043 |
| 210643_at   | 0.008104087 | 0.426786152 | 0.671099911 | 0.80192918  |
| 210644_s_at | 0.111665684 | 1.704919812 | 0.093509097 | 0.206857518 |
| 210645_s_at | -0.25288146 | -4.0847412  | 0.000135842 | 0.000954289 |
| 210646_x_at | -0.01339869 | -0.34362476 | 0.732359082 | 0.843811186 |
| 210647_x_at | 0.024750127 | 0.788321985 | 0.433687734 | 0.614513561 |
| 210648_x_at | -0.03154865 | -0.54553667 | 0.587456327 | 0.742284369 |
| 210649_s_at | 0.206021999 | 3.113833882 | 0.002856507 | 0.012326255 |
| 210650_s_at | -0.80294615 | -5.57518022 | 6.60E-07    | 1.13E-05    |
| 210651_s_at | -0.04210788 | -0.99251432 | 0.325029744 | 0.507200745 |
| 210652_s_at | -0.26118928 | -5.15766418 | 3.11E-06    | 4.07E-05    |
| 210653_s_at | -0.03893765 | -0.87658146 | 0.384295442 | 0.566922987 |
| 210654_at   | -0.01261248 | -0.38441889 | 0.702060325 | 0.824058934 |
| 210655_s_at | -0.04288851 | -0.84898033 | 0.399349159 | 0.581661863 |
| 210656_at   | 0.084176247 | 2.082571019 | 0.04166724  | 0.110430664 |
| 210657_s_at | 0.486773703 | 3.898113    | 0.000251977 | 0.001604287 |
| 210658_s_at | -0.13670853 | -2.11108851 | 0.039043426 | 0.104799945 |
| 210659_at   | -0.02260855 | -0.70386094 | 0.484308553 | 0.659196524 |

|             |             |             |             |             |
|-------------|-------------|-------------|-------------|-------------|
| 210660_at   | 0.011789049 | 0.311947308 | 0.756188447 | 0.859741384 |
| 210661_at   | -0.04255435 | -1.67078939 | 0.100099416 | 0.217741594 |
| 210662_at   | -0.01397346 | -0.99657328 | 0.32307147  | 0.505061919 |
| 210663_s_at | 0.009927694 | 0.293190056 | 0.770413263 | 0.86860014  |
| 210664_s_at | 0.056468839 | 2.694966752 | 0.009172329 | 0.032559948 |
| 210665_at   | -0.00176364 | -0.10818303 | 0.91422029  | 0.954254927 |
| 210666_at   | 0.070506308 | 1.311435968 | 0.19482869  | 0.355037056 |
| 210667_s_at | -0.08250156 | -1.47736248 | 0.144936127 | 0.287058958 |
| 210669_at   | 0.026291306 | 0.772261373 | 0.443064912 | 0.623314564 |
| 210670_at   | -0.03106867 | -0.88494779 | 0.379803666 | 0.562506146 |
| 210671_x_at | -0.07551226 | -1.41876006 | 0.161268968 | 0.310117152 |
| 210672_s_at | 0.009254258 | 0.249654361 | 0.803728237 | 0.889538685 |
| 210673_x_at | 0.054240614 | 1.281201444 | 0.205172771 | 0.368374638 |
| 210674_s_at | -0.25371236 | -3.23560451 | 0.001998301 | 0.00910378  |
| 210675_s_at | -0.36337201 | -6.69072487 | 9.29E-09    | 4.25E-07    |
| 210676_x_at | -0.13104459 | -2.2389392  | 0.028972977 | 0.082839249 |
| 210677_at   | -0.00724603 | -0.17363659 | 0.862749839 | 0.925362768 |
| 210678_s_at | 0.072604134 | 1.2796969   | 0.205698019 | 0.36902119  |
| 210679_x_at | 0.338171115 | 5.479619318 | 9.43E-07    | 1.53E-05    |
| 210680_s_at | -0.0747431  | -2.03446428 | 0.046440919 | 0.120418749 |
| 210681_s_at | 0.082697765 | 1.740210479 | 0.087074488 | 0.196066758 |
| 210682_at   | -0.0559519  | -1.19585822 | 0.236571261 | 0.405851707 |
| 210683_at   | 0.024179385 | 1.499000205 | 0.139244903 | 0.278864188 |
| 210684_s_at | -0.29992149 | -3.90772312 | 0.00024417  | 0.001562715 |
| 210685_s_at | -0.04521404 | -1.01008024 | 0.316611859 | 0.497791907 |
| 210686_x_at | 0.10584029  | 2.504292923 | 0.015075003 | 0.048814089 |
| 210687_at   | 0.032243129 | 1.266171094 | 0.21046505  | 0.375178653 |
| 210688_s_at | 0.064319928 | 1.944281435 | 0.056669732 | 0.140704648 |
| 210689_at   | -0.00868437 | -0.27204405 | 0.786544915 | 0.878279666 |
| 210690_at   | 0.020410632 | 1.394498735 | 0.168434457 | 0.320367398 |
| 210691_s_at | -0.13747738 | -2.02199845 | 0.047752418 | 0.123041284 |
| 210692_s_at | 0.038324841 | 0.803580596 | 0.424888779 | 0.606294039 |
| 210693_at   | 0.029247582 | 0.883275635 | 0.380698767 | 0.563495705 |
| 210694_s_at | 0.324453524 | 7.283360953 | 9.31E-10    | 9.00E-08    |
| 210695_s_at | 0.194390723 | 3.979632653 | 0.000192705 | 0.001276473 |
| 210697_at   | -0.00313365 | -0.09088198 | 0.927896494 | 0.962326831 |
| 210698_at   | 0.000843953 | 0.039775459 | 0.968407424 | 0.983973277 |
| 210699_at   | -0.01862026 | -0.58151269 | 0.563126537 | 0.723945783 |
| 210701_at   | 0.118230453 | 3.444581118 | 0.001063333 | 0.005363713 |
| 210702_s_at | -0.04572823 | -1.45515278 | 0.15096628  | 0.295686957 |
| 210703_at   | -0.00915565 | -0.57138246 | 0.569926762 | 0.728580288 |
| 210704_at   | 0.024870167 | 0.615360428 | 0.540700644 | 0.706186422 |
| 210705_s_at | 0.099199279 | 4.117908736 | 0.000121544 | 0.000870241 |
| 210706_s_at | 0.006926823 | 0.182741129 | 0.855632263 | 0.920933389 |
| 210707_x_at | -0.11199869 | -2.22510217 | 0.02993939  | 0.085004207 |
| 210708_x_at | -0.032387   | -0.58170608 | 0.562997109 | 0.723821034 |
| 210709_at   | -0.04167225 | -1.10616483 | 0.273178308 | 0.449169822 |
| 210710_at   | -0.06918211 | -1.77428615 | 0.081213632 | 0.185828366 |
| 210711_at   | 0.070098613 | 2.067859709 | 0.043079704 | 0.113462661 |
| 210712_at   | -0.00505659 | -0.11788461 | 0.906562463 | 0.950369017 |
| 210713_at   | -0.03287869 | -1.0353715  | 0.30475174  | 0.484767929 |
| 210714_at   | 0.037490421 | 0.875140024 | 0.385072686 | 0.567701956 |
| 210715_s_at | -0.34799515 | -5.41900721 | 1.18E-06    | 1.83E-05    |
| 210716_s_at | -0.07674975 | -1.42681361 | 0.158943308 | 0.306833153 |
| 210717_at   | -0.00305131 | -0.11654962 | 0.907615705 | 0.951034563 |
| 210718_s_at | -0.05752707 | -1.01465144 | 0.314445537 | 0.49563377  |
| 210719_s_at | 0.437608347 | 6.564258061 | 1.52E-08    | 6.07E-07    |
| 210720_s_at | 0.102769305 | 3.107309801 | 0.00291107  | 0.012512172 |
| 210721_s_at | -0.32134326 | -5.3047124  | 1.81E-06    | 2.61E-05    |
| 210722_at   | 0.012106328 | 0.287321172 | 0.774880592 | 0.871065937 |
| 210723_x_at | 0.0510952   | 1.77051611  | 0.081845469 | 0.186824541 |
| 210724_at   | -0.02396886 | -0.54157212 | 0.590167716 | 0.744285917 |
| 210726_at   | 0.071723225 | 2.453241818 | 0.01715408  | 0.05436464  |
| 210727_at   | -0.01810707 | -0.55173995 | 0.583225749 | 0.738986312 |
| 210728_s_at | 0.014893303 | 0.565002102 | 0.574230298 | 0.732050674 |
| 210729_at   | -0.01834222 | -0.38783969 | 0.699540753 | 0.82232224  |
| 210730_s_at | 0.01730926  | 0.452484578 | 0.652591601 | 0.789352848 |
| 210731_s_at | -0.10527694 | -2.7696573  | 0.007504978 | 0.027574191 |
| 210732_s_at | -0.29670188 | -5.79392656 | 2.89E-07    | 5.80E-06    |
| 210733_at   | 0.079187992 | 2.714675389 | 0.008702191 | 0.031158737 |
| 210734_x_at | 0.041475689 | 0.861102033 | 0.392693625 | 0.57547508  |
| 210735_s_at | -1.03171525 | -7.6614126  | 2.14E-10    | 3.39E-08    |
| 210736_x_at | 0.279320576 | 4.181956146 | 9.79E-05    | 0.000724086 |
| 210737_at   | -0.03058133 | -0.73130275 | 0.46751022  | 0.644716328 |
| 210738_s_at | -0.23625418 | -3.88659469 | 0.000261652 | 0.001655632 |



|             |             |             |             |             |
|-------------|-------------|-------------|-------------|-------------|
| 210739_x_at | 0.070082848 | 1.423562642 | 0.159878952 | 0.308200056 |
| 210740_s_at | 0.174194378 | 4.802838817 | 1.12E-05    | 0.000117543 |
| 210741_at   | -0.00336479 | -0.14365414 | 0.886266738 | 0.939158072 |
| 210742_at   | 0.113672297 | 3.630763009 | 0.000595419 | 0.003315532 |
| 210743_s_at | 0.033589085 | 1.483391487 | 0.143332286 | 0.284715165 |
| 210744_s_at | 0.005692368 | 0.148867634 | 0.8821695   | 0.936972273 |
| 210745_at   | 0.032615862 | 0.682255557 | 0.497766957 | 0.670813884 |
| 210746_s_at | 0.034000296 | 0.789502027 | 0.433003424 | 0.613855323 |
| 210747_at   | -0.04210686 | -0.96205918 | 0.339975298 | 0.522819352 |
| 210748_at   | -0.03381611 | -1.19260767 | 0.237832611 | 0.407265223 |
| 210749_x_at | 0.478721352 | 6.544098483 | 1.64E-08    | 6.42E-07    |
| 210750_s_at | -0.04216997 | -1.21462036 | 0.229385524 | 0.397114106 |
| 210751_s_at | 0.20777908  | 3.05920033  | 0.003344575 | 0.014078948 |
| 210752_s_at | -0.03471753 | -1.11505063 | 0.269383421 | 0.445068094 |
| 210753_s_at | -0.21426436 | -3.7188306  | 0.00045008  | 0.002620158 |
| 210754_s_at | 0.290822758 | 4.092094891 | 0.000132538 | 0.000934881 |
| 210755_at   | 0.028650321 | 1.115011298 | 0.269400137 | 0.4450699   |
| 210756_s_at | 0.130574117 | 1.870282035 | 0.066444704 | 0.159293355 |
| 210757_x_at | 0.058725902 | 1.038204864 | 0.303442146 | 0.483266922 |
| 210758_at   | -0.18842725 | -3.59263182 | 0.000671387 | 0.003667272 |
| 210759_s_at | -0.39005371 | -5.06963829 | 4.28E-06    | 5.31E-05    |
| 210760_x_at | 0.083615399 | 2.649278354 | 0.010352913 | 0.03585373  |
| 210761_s_at | 0.016582071 | 0.42182341  | 0.674698292 | 0.804513843 |
| 210762_s_at | -0.46701547 | -7.40045399 | 5.90E-10    | 6.53E-08    |
| 210763_x_at | -0.03033698 | -0.79829166 | 0.427926493 | 0.609189362 |
| 210764_s_at | 0.493555444 | 2.769909249 | 0.007499858 | 0.027561033 |
| 210765_at   | 0.048847701 | 1.265450769 | 0.210721202 | 0.375500477 |
| 210766_s_at | 0.039624499 | 0.547737512 | 0.585953705 | 0.741053529 |
| 210767_at   | -0.0276859  | -1.21922597 | 0.227646218 | 0.395120773 |
| 210768_x_at | 0.046095378 | 1.193725686 | 0.237398227 | 0.406848745 |
| 210769_at   | 0.009530396 | 0.186670701 | 0.852563957 | 0.919069622 |
| 210770_s_at | -0.43998137 | -4.78280979 | 1.21E-05    | 0.000124793 |
| 210771_at   | 0.007502137 | 0.440325332 | 0.661322402 | 0.795473578 |
| 210772_at   | -0.00672065 | -0.2626964  | 0.793706496 | 0.882549964 |
| 210773_s_at | 0.026201267 | 0.614734834 | 0.541110944 | 0.706515829 |
| 210774_s_at | 0.131094939 | 2.315464426 | 0.024109943 | 0.071643722 |
| 210775_x_at | 0.071914953 | 1.436640642 | 0.156140875 | 0.302796494 |
| 210776_x_at | 0.121319384 | 3.487080524 | 0.000932836 | 0.004810792 |
| 210778_s_at | 0.249105608 | 3.963782636 | 0.000203062 | 0.001333223 |
| 210779_x_at | -0.04195574 | -1.43107373 | 0.157723665 | 0.30507167  |
| 210780_at   | -0.01263877 | -0.37423669 | 0.709579787 | 0.829237765 |
| 210781_x_at | -0.74545839 | -6.73584163 | 7.80E-09    | 3.73E-07    |
| 210782_x_at | -0.22952017 | -4.69676368 | 1.64E-05    | 0.000161596 |
| 210783_x_at | 0.02610343  | 0.814089959 | 0.418891191 | 0.60124884  |
| 210784_x_at | 0.001399907 | 0.028410264 | 0.977431528 | 0.988644845 |
| 210785_s_at | 0.156475923 | 2.188547577 | 0.032630418 | 0.091053544 |
| 210786_s_at | -0.0057734  | -0.18870302 | 0.850977967 | 0.918201529 |
| 210787_s_at | -0.60415112 | -5.73329474 | 3.64E-07    | 6.99E-06    |
| 210788_s_at | 0.03318233  | 0.484215703 | 0.630038664 | 0.773981143 |
| 210789_x_at | 0.028746106 | 0.823436248 | 0.41360052  | 0.595838434 |
| 210790_s_at | -0.07413961 | -1.34388785 | 0.184167966 | 0.341358441 |
| 210791_s_at | -0.15413825 | -3.33761802 | 0.001472636 | 0.007058672 |
| 210792_x_at | 0.146893077 | 2.816867091 | 0.006599926 | 0.024793132 |
| 210793_s_at | 0.097788332 | 1.620709009 | 0.110452413 | 0.234628036 |
| 210794_s_at | -0.6217312  | -5.86355599 | 2.22E-07    | 4.68E-06    |
| 210795_s_at | -0.02151139 | -0.49005677 | 0.625924563 | 0.770892526 |
| 210796_x_at | -0.01976384 | -0.46578986 | 0.643093571 | 0.783179952 |
| 210797_s_at | 0.04210906  | 0.846252545 | 0.400856415 | 0.583154029 |
| 210798_x_at | -0.00620753 | -0.13930129 | 0.889689994 | 0.940967329 |
| 210799_at   | -0.01016617 | -0.19272059 | 0.847844538 | 0.916324921 |
| 210800_at   | 0.074990349 | 2.363370935 | 0.02144848  | 0.065195911 |
| 210801_at   | -0.00103611 | -0.06742215 | 0.946475289 | 0.972391833 |
| 210802_s_at | -0.13989057 | -3.59009609 | 0.000676754 | 0.003691173 |
| 210803_at   | 0.026242067 | 0.79701743  | 0.428660281 | 0.60981659  |
| 210804_x_at | -0.16055388 | -3.40944088 | 0.001184134 | 0.005867759 |
| 210805_x_at | -0.00310033 | -0.05908524 | 0.953085364 | 0.975875063 |
| 210806_at   | 0.006605635 | 0.220377158 | 0.826343854 | 0.903752925 |
| 210807_s_at | -0.06554633 | -1.92227624 | 0.059439502 | 0.14592783  |
| 210808_s_at | -0.04414022 | -1.28147246 | 0.205078264 | 0.368278931 |
| 210809_s_at | -0.03163975 | -0.79102147 | 0.432123239 | 0.612996407 |
| 210810_s_at | -0.01917731 | -0.44954312 | 0.654699269 | 0.790793747 |
| 210811_s_at | 0.003085924 | 0.108697457 | 0.91381402  | 0.954246988 |
| 210812_at   | 0.029414606 | 1.201643705 | 0.234338267 | 0.403150582 |
| 210813_s_at | -0.01485417 | -0.54085416 | 0.590659365 | 0.744626339 |
| 210814_at   | -0.01539057 | -0.60472964 | 0.547694528 | 0.711115074 |

|             |             |             |             |             |
|-------------|-------------|-------------|-------------|-------------|
| 210815_s_at | 0.003707846 | 0.104492753 | 0.917135352 | 0.956024937 |
| 210816_s_at | -0.08269594 | -2.45939227 | 0.016890611 | 0.053670472 |
| 210817_s_at | 0.392158166 | 6.26457623  | 4.81E-08    | 1.42E-06    |
| 210818_s_at | 0.015633459 | 0.550214081 | 0.584265025 | 0.739883616 |
| 210819_x_at | 0.024729532 | 0.893432401 | 0.375282345 | 0.558311435 |
| 210820_x_at | 0.069746068 | 2.443153571 | 0.01759425  | 0.055515546 |
| 210821_x_at | -0.02630824 | -0.66371481 | 0.509477251 | 0.680440294 |
| 210822_at   | 0.101756705 | 2.414607059 | 0.018895322 | 0.058864473 |
| 210823_s_at | -0.07011855 | -1.54802674 | 0.127003045 | 0.260702741 |
| 210824_at   | 0.034411149 | 1.035282245 | 0.304793059 | 0.48481373  |
| 210825_s_at | 0.01034605  | 0.230506724 | 0.818501337 | 0.898782844 |
| 210826_x_at | -0.13958433 | -3.48634953 | 0.000934946 | 0.004818338 |
| 210827_s_at | 0.027354268 | 0.491883109 | 0.624640641 | 0.769832599 |
| 210828_s_at | -0.00891759 | -0.24921261 | 0.804068274 | 0.889671684 |
| 210829_s_at | 0.005837487 | 0.155769387 | 0.876750467 | 0.933968915 |
| 210830_s_at | 0.183277321 | 1.604060481 | 0.114080466 | 0.240335826 |
| 210831_s_at | -0.04141689 | -0.93794588 | 0.352124277 | 0.535422502 |
| 210832_x_at | 0.02032537  | 0.541778641 | 0.590026327 | 0.744244749 |
| 210833_at   | -0.00619263 | -0.38584073 | 0.701012669 | 0.823381293 |
| 210834_s_at | 0.047790881 | 1.332572118 | 0.187833838 | 0.345957959 |
| 210835_s_at | 0.683860886 | 7.351326649 | 7.15E-10    | 7.43E-08    |
| 210836_x_at | 0.038842434 | 1.266575092 | 0.210321487 | 0.375057373 |
| 210837_s_at | 0.036063552 | 1.258689782 | 0.213136736 | 0.378488531 |
| 210838_s_at | 0.049834597 | 0.910109563 | 0.366495239 | 0.549662916 |
| 210839_s_at | -0.08742868 | -0.53831069 | 0.592402659 | 0.74585626  |
| 210840_s_at | 0.291685766 | 5.029056939 | 4.97E-06    | 5.99E-05    |
| 210841_s_at | -0.02649187 | -0.74417974 | 0.459743251 | 0.638259362 |
| 210842_at   | -0.09871266 | -2.12440376 | 0.037868424 | 0.102409271 |
| 210843_s_at | -0.02942593 | -0.75316243 | 0.454369355 | 0.63353753  |
| 210844_x_at | 0.136865947 | 1.934564359 | 0.057878929 | 0.142944579 |
| 210845_s_at | -0.01828506 | -0.36600754 | 0.715678251 | 0.833379166 |
| 210846_x_at | -0.02932598 | -0.72248086 | 0.472874076 | 0.64898932  |
| 210847_x_at | -0.01973272 | -0.45275216 | 0.652400009 | 0.789265909 |
| 210848_at   | 0.026844358 | 0.742294951 | 0.460875445 | 0.639195798 |
| 210849_s_at | -0.02623837 | -0.48882365 | 0.626792115 | 0.771547999 |
| 210850_s_at | -0.08637229 | -1.35030469 | 0.182113434 | 0.338857303 |
| 210852_s_at | 0.06653382  | 1.470519924 | 0.146773439 | 0.289616484 |
| 210853_at   | 0.005587966 | 0.170890685 | 0.864898758 | 0.926866854 |
| 210854_x_at | 0.099921333 | 1.448846934 | 0.152713655 | 0.298025355 |
| 210855_at   | 0.018736047 | 0.610724413 | 0.543744991 | 0.708320249 |
| 210858_x_at | 0.246845667 | 4.101318646 | 0.000128504 | 0.000912182 |
| 210859_x_at | 0.038705044 | 1.032817115 | 0.305935686 | 0.486025796 |
| 210861_s_at | -0.09064312 | -2.16250454 | 0.034675084 | 0.095595513 |
| 210862_s_at | -0.09796666 | -2.25338841 | 0.027993306 | 0.080532786 |
| 210864_x_at | -0.02547428 | -0.52337411 | 0.602688697 | 0.753626459 |
| 210865_at   | -0.09079068 | -1.58909282 | 0.117423815 | 0.245676941 |
| 210866_s_at | -0.10669859 | -3.37720288 | 0.001306297 | 0.006377653 |
| 210867_at   | 0.038247702 | 0.980409317 | 0.33091685  | 0.513447293 |
| 210868_s_at | -0.01198428 | -0.46696768 | 0.642255624 | 0.782585974 |
| 210869_s_at | 0.075208569 | 0.769766661 | 0.444532076 | 0.624697699 |
| 210870_s_at | 0.08258686  | 2.339494285 | 0.022740287 | 0.068314101 |
| 210871_x_at | -0.72875185 | -5.86589127 | 2.20E-07    | 4.64E-06    |
| 210872_x_at | -0.60124393 | -5.31366334 | 1.75E-06    | 2.54E-05    |
| 210873_x_at | 0.008476776 | 0.311675055 | 0.756394322 | 0.85978889  |
| 210874_s_at | -0.15748971 | -3.16337245 | 0.002472391 | 0.010892755 |
| 210875_s_at | 0.001075145 | 0.012383021 | 0.990162118 | 0.995348062 |
| 210876_at   | -2.15E-05   | -0.00035571 | 0.999717394 | 0.999822772 |
| 210878_s_at | 0.118863295 | 2.433086945 | 0.018043571 | 0.056701116 |
| 210879_s_at | -0.20444695 | -4.50979825 | 3.17E-05    | 0.000280423 |
| 210880_s_at | 0.015654422 | 0.300732817 | 0.764683272 | 0.864779594 |
| 210881_s_at | -0.03409401 | -0.76698341 | 0.44617228  | 0.62610938  |
| 210882_s_at | -0.0593863  | -1.13187751 | 0.262299139 | 0.436777567 |
| 210883_x_at | -0.07900287 | -1.92282584 | 0.059368946 | 0.14579413  |
| 210884_s_at | 0.014470201 | 0.501300313 | 0.61803891  | 0.765428909 |
| 210885_s_at | 0.023455911 | 0.564758438 | 0.574394961 | 0.732135288 |
| 210886_x_at | 0.027840762 | 0.677188838 | 0.500952426 | 0.673464124 |
| 210887_s_at | 0.013563775 | 0.304703148 | 0.761672416 | 0.862797306 |
| 210888_s_at | 0.030107547 | 1.207748386 | 0.231998722 | 0.400389515 |
| 210889_s_at | 0.031212654 | 0.57337739  | 0.568584433 | 0.727801102 |
| 210890_x_at | 0.001814051 | 0.043019673 | 0.965832187 | 0.982607665 |
| 210891_s_at | 0.231940577 | 4.069957636 | 0.000142727 | 0.000993576 |
| 210892_s_at | -0.07497085 | -1.68505223 | 0.097300545 | 0.213143611 |
| 210893_at   | -0.01291052 | -0.56574115 | 0.573731003 | 0.731706361 |
| 210894_s_at | 0.018382822 | 0.616293982 | 0.540088663 | 0.705720987 |
| 210895_s_at | 0.166317219 | 2.894763773 | 0.005323816 | 0.020756519 |

|             |             |             |             |             |
|-------------|-------------|-------------|-------------|-------------|
| 210896_s_at | 0.0838383   | 0.937037932 | 0.352587171 | 0.535725364 |
| 210904_s_at | 0.061455519 | 1.129598902 | 0.263250655 | 0.437970378 |
| 210905_x_at | 0.075008519 | 2.514485198 | 0.014688246 | 0.047734662 |
| 210906_x_at | 0.60661047  | 4.142130947 | 0.000112033 | 0.000810321 |
| 210907_s_at | -0.12801825 | -1.54739807 | 0.127154402 | 0.260917564 |
| 210908_s_at | 0.019581131 | 0.393646507 | 0.695271541 | 0.819424614 |
| 210909_x_at | -0.00416279 | -0.09295798 | 0.926254213 | 0.96133974  |
| 210910_s_at | 0.026538587 | 0.301699308 | 0.763950006 | 0.864300273 |
| 210911_at   | 0.060907752 | 2.906533625 | 0.005152191 | 0.020201939 |
| 210912_x_at | 0.069280833 | 2.371123145 | 0.02104338  | 0.064169675 |
| 210913_at   | 0.086705505 | 2.997788694 | 0.003985675 | 0.016349498 |
| 210914_at   | -0.04435871 | -1.17637405 | 0.244204872 | 0.415239736 |
| 210915_x_at | 0.036854349 | 0.838352521 | 0.40524137  | 0.587620367 |
| 210916_s_at | 0.376766359 | 4.700783006 | 1.62E-05    | 0.000160046 |
| 210917_at   | -0.01284925 | -0.42004373 | 0.675990569 | 0.805378826 |
| 210918_at   | -0.03981059 | -1.12018166 | 0.267209075 | 0.442501715 |
| 210919_at   | 0.012915065 | 0.701181488 | 0.485966574 | 0.660741522 |
| 210920_x_at | 0.062593953 | 2.251797493 | 0.028099718 | 0.080780926 |
| 210921_at   | -0.02165889 | -0.55683469 | 0.579762124 | 0.736393135 |
| 210922_at   | -0.0565259  | -0.77699615 | 0.440288168 | 0.620795621 |
| 210923_at   | -0.0539655  | -1.04890398 | 0.298531589 | 0.4777104   |
| 210924_at   | 0.032529488 | 0.841270102 | 0.403618535 | 0.585961057 |
| 210925_at   | -0.00509011 | -0.11219068 | 0.911055866 | 0.952978153 |
| 210926_at   | -0.06042632 | -1.85288614 | 0.068939087 | 0.163824488 |
| 210927_x_at | -0.12280267 | -2.91677352 | 0.005007061 | 0.019740259 |
| 210928_at   | -0.06168937 | -1.52868936 | 0.131724909 | 0.267702681 |
| 210929_s_at | 0.010269227 | 0.384710152 | 0.701845667 | 0.823948266 |
| 210930_s_at | 0.029618673 | 0.828430671 | 0.410790028 | 0.593049324 |
| 210931_at   | 0.000107439 | 0.005956607 | 0.995267587 | 0.9978128   |
| 210932_s_at | -0.01753338 | -0.86276715 | 0.391784797 | 0.574595417 |
| 210933_s_at | -0.20440808 | -2.55931507 | 0.013091477 | 0.043455458 |
| 210934_at   | 0.028463545 | 0.731865828 | 0.467169038 | 0.644444338 |
| 210935_s_at | 0.040772254 | 0.663833213 | 0.509402002 | 0.680420642 |
| 210936_at   | 0.046616755 | 2.074669729 | 0.04242078  | 0.112055646 |
| 210937_s_at | 0.058907979 | 1.296892258 | 0.199754477 | 0.361478199 |
| 210938_at   | -0.06764387 | -1.36565704 | 0.177268762 | 0.332333383 |
| 210939_s_at | -0.08188643 | -2.34888278 | 0.022224285 | 0.067070547 |
| 210940_s_at | 0.024162215 | 0.58435511  | 0.56122571  | 0.722658914 |
| 210941_at   | -0.00462685 | -0.29667033 | 0.767767796 | 0.866986713 |
| 210942_s_at | -0.11002037 | -1.89108128 | 0.063562823 | 0.15387843  |
| 210943_s_at | 0.073351575 | 1.667964456 | 0.100661508 | 0.218651961 |
| 210944_s_at | 0.422207251 | 2.754599912 | 0.007816823 | 0.028536961 |
| 210945_at   | -0.02135258 | -0.74823194 | 0.457314512 | 0.63612775  |
| 210946_at   | 0.4692924   | 5.256145162 | 2.16E-06    | 3.02E-05    |
| 210947_s_at | -0.14052344 | -3.88435936 | 0.00026357  | 0.001665413 |
| 210948_s_at | 0.037563657 | 1.528849976 | 0.131685124 | 0.267646166 |
| 210949_s_at | -0.30815701 | -3.00197042 | 0.003938623 | 0.016189179 |
| 210950_s_at | 0.096261865 | 1.403837861 | 0.165647684 | 0.316467587 |
| 210951_x_at | 0.07585292  | 1.843720922 | 0.070284721 | 0.166156569 |
| 210952_at   | -0.00657003 | -0.23961724 | 0.811463643 | 0.894338208 |
| 210953_at   | 0.016188839 | 0.807991573 | 0.422365234 | 0.604294492 |
| 210954_s_at | -0.01573938 | -0.46544375 | 0.643339893 | 0.783351855 |
| 210955_at   | -0.0312262  | -0.5216873  | 0.603855482 | 0.754469742 |
| 210956_at   | 0.04201811  | 1.450755377 | 0.152183159 | 0.297265381 |
| 210957_s_at | 0.119085789 | 2.973043841 | 0.004274978 | 0.017343004 |
| 210958_s_at | 0.237335018 | 5.502503165 | 8.66E-07    | 1.42E-05    |
| 210959_s_at | -0.17264853 | -3.98408792 | 0.000189886 | 0.00126042  |
| 210960_at   | 0.020532432 | 0.757677621 | 0.451681908 | 0.631047168 |
| 210961_s_at | -0.09276637 | -1.94597614 | 0.056461066 | 0.140311274 |
| 210962_s_at | 0.013638092 | 0.147105793 | 0.883553758 | 0.937751658 |
| 210963_s_at | 0.228381164 | 3.300775337 | 0.00164527  | 0.007748197 |
| 210964_s_at | 0.402400049 | 5.288572936 | 1.92E-06    | 2.74E-05    |
| 210965_x_at | 0.02436223  | 1.288602889 | 0.202603425 | 0.365176572 |
| 210966_x_at | 0.011698071 | 0.361390079 | 0.71910836  | 0.835648124 |
| 210967_x_at | -0.19208358 | -4.1512826  | 0.00010863  | 0.000789972 |
| 210968_s_at | -0.33518938 | -3.66722207 | 0.000530507 | 0.003012635 |
| 210969_at   | 0.041497277 | 1.456852559 | 0.150497947 | 0.294947134 |
| 210970_s_at | -0.01927813 | -0.2685818  | 0.789195353 | 0.879832337 |
| 210971_s_at | -0.31651444 | -5.20318205 | 2.63E-06    | 3.55E-05    |
| 210972_x_at | -0.54258597 | -7.09403545 | 1.94E-09    | 1.43E-07    |
| 210973_s_at | 0.097476665 | 1.88024034  | 0.065051418 | 0.156684343 |
| 210974_s_at | -0.09428918 | -2.23497244 | 0.02924717  | 0.083436391 |
| 210975_x_at | -0.09576798 | -3.16669679 | 0.002448433 | 0.010802108 |
| 210976_s_at | -0.30019507 | -4.83997161 | 9.84E-06    | 0.000105359 |
| 210977_s_at | -0.04901466 | -0.92522009 | 0.3586482   | 0.541713945 |

|             |             |             |             |             |
|-------------|-------------|-------------|-------------|-------------|
| 210978_s_at | 0.326718478 | 3.808047484 | 0.000337802 | 0.002055448 |
| 210979_at   | -0.00086232 | -0.0329983  | 0.973788149 | 0.986726068 |
| 210980_s_at | 0.112929208 | 1.537404579 | 0.129579798 | 0.264570347 |
| 210981_s_at | 0.142992597 | 2.824165137 | 0.006469356 | 0.024382381 |
| 210982_s_at | 0.367037682 | 1.979677423 | 0.052445753 | 0.132424045 |
| 210983_s_at | 0.327970813 | 5.747721222 | 3.45E-07    | 6.71E-06    |
| 210984_x_at | -0.04170421 | -0.93265181 | 0.354828882 | 0.537962429 |
| 210985_s_at | 0.044487063 | 2.031129904 | 0.046788638 | 0.121137633 |
| 210986_s_at | 0.103967871 | 1.338274769 | 0.185979546 | 0.343704166 |
| 210987_x_at | -0.03718008 | -0.61052312 | 0.543877372 | 0.708449078 |
| 210988_s_at | 0.000297733 | 0.005609867 | 0.995543063 | 0.997909895 |
| 210989_at   | -0.01311448 | -0.37165237 | 0.71149294  | 0.830431237 |
| 210990_s_at | 0.021648359 | 0.590340692 | 0.557233385 | 0.719307794 |
| 210991_s_at | -0.05848739 | -1.58473407 | 0.118412133 | 0.247212362 |
| 210992_x_at | 0.034302798 | 0.698530906 | 0.48760982  | 0.66195614  |
| 210993_s_at | 0.209043527 | 2.215461822 | 0.030629389 | 0.086534462 |
| 210994_x_at | -0.18369596 | -2.63156829 | 0.010846699 | 0.037223424 |
| 210995_s_at | -0.26668365 | -3.45235538 | 0.001038235 | 0.005259074 |
| 210996_s_at | -0.02267601 | -0.4945302  | 0.622781798 | 0.768323565 |
| 210997_at   | 0.010521554 | 0.439845603 | 0.661667847 | 0.795737281 |
| 210998_s_at | -0.01148723 | -0.20816827 | 0.835819827 | 0.90937653  |
| 210999_s_at | -0.05353518 | -1.42134691 | 0.160519095 | 0.309060804 |
| 211000_s_at | 0.19118002  | 2.23047565  | 0.029560767 | 0.084116249 |
| 211001_at   | 0.037362021 | 0.956321888 | 0.342840637 | 0.525742305 |
| 211002_s_at | -0.02478127 | -0.63636118 | 0.527020362 | 0.695051873 |
| 211003_x_at | 0.005101924 | 0.082010264 | 0.934918191 | 0.966170385 |
| 211004_s_at | 0.022528739 | 0.355120596 | 0.723774979 | 0.83856876  |
| 211005_at   | 0.038673134 | 1.04345855  | 0.301024028 | 0.480477352 |
| 211006_s_at | -0.61839926 | -5.95166754 | 1.59E-07    | 3.61E-06    |
| 211008_s_at | 0.00137864  | 0.035071414 | 0.972142058 | 0.985862783 |
| 211009_s_at | 0.321363388 | 3.744948118 | 0.000413962 | 0.002441705 |
| 211010_s_at | -0.03650828 | -1.04554203 | 0.300068719 | 0.479380561 |
| 211011_at   | -0.01880198 | -0.76737377 | 0.445942027 | 0.625912854 |
| 211012_s_at | 0.060292656 | 1.73222023  | 0.088498328 | 0.198423081 |
| 211013_x_at | 0.055033713 | 1.665806941 | 0.101092535 | 0.219396279 |
| 211014_s_at | 0.060322519 | 1.121888004 | 0.266488735 | 0.441763657 |
| 211015_s_at | 0.035995494 | 0.695469538 | 0.489511559 | 0.663791814 |
| 211016_x_at | -0.01433109 | -0.29807302 | 0.766702348 | 0.866120553 |
| 211017_s_at | -0.03945856 | -1.34867704 | 0.182632912 | 0.339541167 |
| 211018_at   | 0.038958313 | 1.085163682 | 0.282295896 | 0.459590266 |
| 211019_s_at | -0.11112927 | -2.18474479 | 0.032922216 | 0.091759258 |
| 211020_at   | -0.06034076 | -1.39001486 | 0.169785195 | 0.322086673 |
| 211021_s_at | -1.067189   | -8.77669046 | 2.86E-12    | 3.44E-09    |
| 211022_s_at | -0.01013867 | -0.40169907 | 0.689367634 | 0.814982276 |
| 211023_at   | -0.26697723 | -4.10296991 | 0.000127794 | 0.000907865 |
| 211024_s_at | 0.052014813 | 1.061694083 | 0.292733115 | 0.471232518 |
| 211025_x_at | -0.26295881 | -3.98408762 | 0.000189887 | 0.00126042  |
| 211026_s_at | -0.10701123 | -1.3618401  | 0.178463962 | 0.334013626 |
| 211027_s_at | 0.02944049  | 1.368669729 | 0.176329723 | 0.331028814 |
| 211028_s_at | 0.062509412 | 2.086992871 | 0.041250625 | 0.109540875 |
| 211029_x_at | -0.00827722 | -0.21845205 | 0.827836352 | 0.904419762 |
| 211030_s_at | -0.01778436 | -0.33528399 | 0.738608899 | 0.848343885 |
| 211031_s_at | 0.455060583 | 6.186731997 | 6.48E-08    | 1.79E-06    |
| 211032_at   | -0.00709454 | -0.35679822 | 0.722525219 | 0.837837551 |
| 211033_s_at | -0.01501026 | -0.33661882 | 0.737607493 | 0.847672969 |
| 211034_s_at | -0.33236168 | -4.96395511 | 6.29E-06    | 7.28E-05    |
| 211036_x_at | 0.110389546 | 1.933197598 | 0.058050762 | 0.143267801 |
| 211037_s_at | -0.00908254 | -0.23829449 | 0.812484487 | 0.894770014 |
| 211038_s_at | 0.112687826 | 1.207062185 | 0.232260849 | 0.400749048 |
| 211039_at   | 0.01624642  | 0.326392245 | 0.745291127 | 0.85253522  |
| 211040_x_at | 0.134189126 | 3.559630196 | 0.000744515 | 0.003997822 |
| 211042_x_at | 0.186391617 | 4.148640359 | 0.000109602 | 0.000795573 |
| 211043_s_at | -0.17388599 | -3.65261013 | 0.000555666 | 0.003131237 |
| 211044_at   | 0.006986471 | 0.20414668  | 0.838946628 | 0.911088758 |
| 211045_s_at | 0.049017858 | 1.576992391 | 0.120183995 | 0.249814571 |
| 211046_at   | 0.002558387 | 0.152028887 | 0.879686668 | 0.935469021 |
| 211047_x_at | -0.22295317 | -3.40099929 | 0.001215033 | 0.005997597 |
| 211048_s_at | 0.228925046 | 3.281464627 | 0.001743215 | 0.008129788 |
| 211049_at   | 0.030049815 | 0.975964444 | 0.333096207 | 0.515790845 |
| 211050_x_at | -0.00166589 | -0.04538174 | 0.963957422 | 0.98147095  |
| 211051_s_at | -0.15976587 | -4.18826462 | 9.59E-05    | 0.000710671 |
| 211052_s_at | -0.1891649  | -4.08595936 | 0.00013529  | 0.000951434 |
| 211053_at   | -0.05935133 | -1.253487   | 0.215009476 | 0.380803816 |
| 211054_at   | 0.00675455  | 0.378185936 | 0.706659808 | 0.827120895 |
| 211055_s_at | 0.02035385  | 1.007729361 | 0.317729861 | 0.499007743 |

|             |             |             |             |             |
|-------------|-------------|-------------|-------------|-------------|
| 211056_s_at | -0.25271612 | -5.21269054 | 2.54E-06    | 3.44E-05    |
| 211057_at   | 0.112292372 | 2.477285577 | 0.016144699 | 0.051693572 |
| 211058_x_at | -0.02790335 | -0.39830974 | 0.691850253 | 0.816999722 |
| 211059_s_at | -0.03164302 | -0.78795221 | 0.433902297 | 0.61462272  |
| 211060_x_at | -0.14586955 | -2.96622344 | 0.004358086 | 0.017610452 |
| 211061_s_at | -0.07216286 | -2.5267181  | 0.014235911 | 0.046494544 |
| 211062_s_at | -0.01954153 | -0.51547054 | 0.608164646 | 0.757670439 |
| 211063_s_at | 0.18533551  | 3.441672559 | 0.001072871 | 0.005400848 |
| 211064_at   | -0.01608381 | -0.57143494 | 0.569891433 | 0.728576804 |
| 211065_x_at | 0.085238364 | 2.366305097 | 0.02129434  | 0.064824376 |
| 211066_x_at | 0.044481502 | 0.92527375  | 0.358620527 | 0.541713945 |
| 211067_s_at | -0.57390355 | -5.17848344 | 2.88E-06    | 3.81E-05    |
| 211068_x_at | 0.14020711  | 3.045898929 | 0.003474667 | 0.014563426 |
| 211069_s_at | -0.04958656 | -0.90691013 | 0.368170726 | 0.551324714 |
| 211070_x_at | 0.47064918  | 5.499840412 | 8.74E-07    | 1.43E-05    |
| 211071_s_at | -0.97009644 | -6.5176503  | 1.81E-08    | 6.89E-07    |
| 211072_x_at | -0.03264293 | -0.48167122 | 0.631834545 | 0.775290325 |
| 211073_x_at | -0.02800837 | -0.66680072 | 0.507517981 | 0.67871078  |
| 211074_at   | 0.250816289 | 1.881001695 | 0.06494592  | 0.156497712 |
| 211075_s_at | -0.14798095 | -1.73010723 | 0.088878061 | 0.199024867 |
| 211076_x_at | -0.00491555 | -0.08471873 | 0.932773943 | 0.965100847 |
| 211077_s_at | -0.04287437 | -1.17595076 | 0.244372659 | 0.415440027 |
| 211078_s_at | 0.002823051 | 0.16267557  | 0.87133388  | 0.930527701 |
| 211079_s_at | -0.03074486 | -0.98420348 | 0.329064045 | 0.511467688 |
| 211080_s_at | -0.05766743 | -1.84992548 | 0.069371376 | 0.164623031 |
| 211081_s_at | 0.183791854 | 3.192785048 | 0.00226784  | 0.010131827 |
| 211082_x_at | -0.10402106 | -3.64365513 | 0.000571644 | 0.003208328 |
| 211083_s_at | -0.0755684  | -2.22881981 | 0.029676987 | 0.084355652 |
| 211084_x_at | 0.025321952 | 0.688189302 | 0.49405049  | 0.667614671 |
| 211085_s_at | 0.022992237 | 0.928861339 | 0.356773583 | 0.539865414 |
| 211086_x_at | 0.075762299 | 2.229449401 | 0.02963275  | 0.084272788 |
| 211087_x_at | -0.00998216 | -0.3961896  | 0.693404947 | 0.818177129 |
| 211088_s_at | -0.01467885 | -0.31393084 | 0.754689058 | 0.859009169 |
| 211089_s_at | 0.120381419 | 1.957654487 | 0.055040892 | 0.137544237 |
| 211090_s_at | -0.19234896 | -1.34798273 | 0.182854853 | 0.339729172 |
| 211091_s_at | -0.03051035 | -1.11304176 | 0.270238094 | 0.445893853 |
| 211092_s_at | -0.01457497 | -0.68142814 | 0.4982864   | 0.671291246 |
| 211093_at   | -0.02728427 | -1.47857582 | 0.144612225 | 0.286658812 |
| 211094_s_at | -0.04920655 | -1.10116743 | 0.275328963 | 0.451708895 |
| 211095_at   | 0.005616649 | 0.343935652 | 0.732126477 | 0.843665429 |
| 211096_at   | -0.10579318 | -2.02355048 | 0.047587412 | 0.122711259 |
| 211097_s_at | -0.02186461 | -0.53922964 | 0.591772533 | 0.745482933 |
| 211098_x_at | 0.045633296 | 1.124501861 | 0.265387948 | 0.440509496 |
| 211099_s_at | 0.003526768 | 0.090942649 | 0.927848494 | 0.96229938  |
| 211100_x_at | 0.024670028 | 0.55519462  | 0.580876034 | 0.737086836 |
| 211101_x_at | 0.019522089 | 0.478665904 | 0.633958548 | 0.776753905 |
| 211102_s_at | -0.023257   | -0.52157635 | 0.603932268 | 0.754527031 |
| 211103_at   | -0.03113925 | -1.16193163 | 0.249976605 | 0.42238013  |
| 211104_s_at | -0.02342789 | -0.57326991 | 0.568656717 | 0.72783947  |
| 211105_s_at | 0.342671355 | 6.052773475 | 1.08E-07    | 2.68E-06    |
| 211106_at   | -0.07257812 | -1.34540418 | 0.183680889 | 0.340823145 |
| 211107_s_at | 0.051766349 | 0.912607825 | 0.365190342 | 0.54851896  |
| 211108_s_at | 0.00089475  | 0.044253743 | 0.964852685 | 0.982023202 |
| 211109_at   | -0.03903938 | -0.9927391  | 0.324921095 | 0.5071078   |
| 211110_s_at | -0.00716445 | -0.19697503 | 0.844529066 | 0.914474412 |
| 211111_at   | -0.01667298 | -0.41266172 | 0.681361276 | 0.809447053 |
| 211112_at   | 0.079446198 | 1.661722997 | 0.101912552 | 0.220860728 |
| 211113_s_at | -0.02408797 | -0.6865497  | 0.495075894 | 0.668356196 |
| 211114_x_at | -0.07490613 | -2.32014604 | 0.023837482 | 0.071027718 |
| 211115_x_at | -0.05908625 | -1.20499219 | 0.233052887 | 0.401740129 |
| 211116_at   | 0.007027738 | 0.159405487 | 0.873897883 | 0.932196677 |
| 211117_x_at | -0.04624408 | -1.0127679  | 0.315336945 | 0.496583466 |
| 211118_x_at | -0.01958303 | -0.42796237 | 0.670248188 | 0.801469643 |
| 211119_at   | 0.02590784  | 1.072162314 | 0.28804536  | 0.466205166 |
| 211120_x_at | 0.02562377  | 0.721489352 | 0.473479094 | 0.64950777  |
| 211121_s_at | 0.128789611 | 4.129496942 | 0.0001169   | 0.000840902 |
| 211122_s_at | -0.05817334 | -1.41071669 | 0.163617915 | 0.313487605 |
| 211123_at   | -0.03875315 | -0.87685626 | 0.38414738  | 0.566836314 |
| 211124_s_at | 0.010325862 | 0.613215014 | 0.542108393 | 0.707053881 |
| 211125_x_at | -0.67260951 | -6.8064689  | 5.93E-09    | 3.11E-07    |
| 211126_s_at | 0.831102804 | 6.214329306 | 5.83E-08    | 1.66E-06    |
| 211127_x_at | 0.113247591 | 2.296331742 | 0.02525243  | 0.074307453 |
| 211128_at   | -0.05146383 | -1.23172731 | 0.222973741 | 0.390101484 |
| 211129_x_at | 0.010309592 | 0.229941149 | 0.818938734 | 0.899086418 |
| 211130_x_at | 0.035021801 | 0.803812177 | 0.424756065 | 0.60614337  |

|             |             |             |             |             |
|-------------|-------------|-------------|-------------|-------------|
| 211131_s_at | 0.020151366 | 0.556600051 | 0.579921423 | 0.736508999 |
| 211132_at   | -0.04418712 | -1.19575769 | 0.236610201 | 0.405900226 |
| 211133_x_at | -0.03210554 | -0.61286648 | 0.542337267 | 0.707187289 |
| 211135_x_at | 0.030155575 | 0.597966741 | 0.552167524 | 0.71465607  |
| 211136_s_at | -0.43669497 | -5.16267883 | 3.05E-06    | 4.01E-05    |
| 211137_s_at | -0.1949827  | -2.1036306  | 0.039715327 | 0.106291238 |
| 211138_s_at | -0.02547382 | -0.49690247 | 0.621118031 | 0.767280677 |
| 211139_s_at | 0.086559381 | 2.074905629 | 0.042398112 | 0.112002389 |
| 211140_s_at | -0.02563885 | -0.68894785 | 0.49357649  | 0.667218792 |
| 211141_s_at | -0.06367211 | -2.08317158 | 0.041610443 | 0.1103063   |
| 211142_x_at | -0.02496709 | -0.6797486  | 0.49934171  | 0.672105159 |
| 211143_x_at | 0.013699036 | 0.289511943 | 0.773212099 | 0.870153227 |
| 211144_x_at | 0.250326151 | 2.921872867 | 0.004936211 | 0.019519478 |
| 211145_x_at | -0.0404508  | -0.71100731 | 0.479901881 | 0.655314091 |
| 211146_at   | -0.00716983 | -0.2271231  | 0.821118976 | 0.900555118 |
| 211147_s_at | -0.00140736 | -0.03525085 | 0.971999589 | 0.985830151 |
| 211148_s_at | 0.0233298   | 0.334045284 | 0.7395386   | 0.848943283 |
| 211149_at   | 0.029863962 | 1.240499718 | 0.219737271 | 0.386618563 |
| 211150_s_at | -0.24603888 | -4.73425252 | 1.44E-05    | 0.000144321 |
| 211151_x_at | -0.05223756 | -1.4618743  | 0.149120967 | 0.292971438 |
| 211152_s_at | 0.026317115 | 0.875699463 | 0.384770912 | 0.567380942 |
| 211153_s_at | -0.08918422 | -1.58246507 | 0.118929257 | 0.24785201  |
| 211154_at   | 0.013077654 | 0.546257554 | 0.58696394  | 0.741857291 |
| 211155_s_at | -0.03015954 | -1.08221379 | 0.283593347 | 0.461088816 |
| 211156_at   | -0.09028248 | -1.84222918 | 0.070505818 | 0.16653697  |
| 211157_at   | -0.01781292 | -0.34570208 | 0.730805335 | 0.842987609 |
| 211159_s_at | -0.28227621 | -5.0033232  | 5.45E-06    | 6.46E-05    |
| 211160_x_at | -0.48550663 | -6.52442832 | 1.77E-08    | 6.73E-07    |
| 211161_s_at | 0.02723898  | 1.337535582 | 0.186219116 | 0.344004341 |
| 211162_x_at | -0.28622318 | -2.96008906 | 0.004434116 | 0.017869207 |
| 211163_s_at | 0.03548815  | 1.313449183 | 0.1941541   | 0.354142205 |
| 211164_at   | 0.01077255  | 0.671156359 | 0.504759478 | 0.676726087 |
| 211165_x_at | -0.05265093 | -1.12106279 | 0.266836932 | 0.442060471 |
| 211166_at   | -0.11000447 | -2.82976046 | 0.006370868 | 0.024070236 |
| 211167_s_at | 0.112516115 | 2.400836133 | 0.019553301 | 0.060496791 |
| 211168_s_at | 0.10070194  | 2.743469786 | 0.008054939 | 0.029260452 |
| 211169_s_at | -0.00619547 | -0.28863624 | 0.773878907 | 0.87054349  |
| 211170_s_at | -0.47342143 | -5.20539039 | 2.61E-06    | 3.52E-05    |
| 211171_s_at | -0.29476151 | -5.18966752 | 2.76E-06    | 3.69E-05    |
| 211172_x_at | 0.038790327 | 0.931717276 | 0.355307708 | 0.538412915 |
| 211173_at   | 0.002686146 | 0.058160629 | 0.953818671 | 0.976252469 |
| 211174_s_at | -0.10192273 | -1.76041112 | 0.083559204 | 0.18976716  |
| 211175_at   | 0.039592464 | 1.209978866 | 0.231148174 | 0.399337979 |
| 211176_s_at | -0.01493994 | -0.29829982 | 0.766530114 | 0.866021204 |
| 211177_s_at | -0.00908653 | -0.22716597 | 0.821085804 | 0.900555118 |
| 211178_s_at | 0.091074495 | 2.013707455 | 0.048642269 | 0.12480167  |
| 211179_at   | -0.047869   | -1.48123136 | 0.143905312 | 0.285611916 |
| 211180_x_at | 0.01164262  | 0.207954183 | 0.835986211 | 0.909491133 |
| 211181_x_at | -0.02315053 | -0.4592219  | 0.647774786 | 0.786309705 |
| 211182_x_at | -0.07677422 | -1.77148606 | 0.08168252  | 0.186595036 |
| 211184_s_at | 0.292665799 | 3.632761521 | 0.000591673 | 0.003301252 |
| 211185_s_at | 0.202351763 | 4.252742106 | 7.70E-05    | 0.00059219  |
| 211186_s_at | -0.12499788 | -2.23435652 | 0.029289949 | 0.083524883 |
| 211187_at   | -0.02139346 | -1.12332659 | 0.265882497 | 0.441117402 |
| 211188_at   | 0.022285734 | 0.517002625 | 0.607101372 | 0.756814999 |
| 211189_x_at | 0.040301215 | 0.840524562 | 0.404032844 | 0.586362587 |
| 211190_x_at | 0.029965397 | 0.773682959 | 0.442230136 | 0.622590935 |
| 211191_at   | 0.012271061 | 0.492193157 | 0.624422792 | 0.769627783 |
| 211192_s_at | 0.026302282 | 0.516718483 | 0.607298503 | 0.756976285 |
| 211193_at   | -0.00702697 | -0.14289527 | 0.886863385 | 0.93925616  |
| 211194_s_at | 0.010090583 | 0.190374221 | 0.849674251 | 0.917513518 |
| 211195_s_at | 0.013412224 | 0.21196931  | 0.832866943 | 0.907585977 |
| 211196_at   | -0.05005983 | -1.19359376 | 0.237449455 | 0.40687413  |
| 211197_s_at | 0.013191513 | 0.336150645 | 0.737958674 | 0.847923927 |
| 211198_s_at | -0.00995291 | -0.24264506 | 0.809128135 | 0.892811757 |
| 211199_s_at | -0.03868194 | -1.1641883  | 0.249068367 | 0.421482903 |
| 211200_s_at | 0.20110362  | 3.118671963 | 0.002816665 | 0.012185266 |
| 211201_at   | 0.058525248 | 1.546912205 | 0.127271477 | 0.261049926 |
| 211202_s_at | -0.13058432 | -3.2010095  | 0.002213553 | 0.009929339 |
| 211203_s_at | -0.22317506 | -3.44587141 | 0.001059128 | 0.005344915 |
| 211204_at   | 0.004583733 | 0.142303517 | 0.887328691 | 0.939453645 |
| 211205_x_at | -0.06609719 | -1.32976012 | 0.188753335 | 0.347065088 |
| 211207_s_at | -0.17107452 | -3.27305749 | 0.001787552 | 0.008300186 |
| 211208_s_at | 0.276884915 | 4.225893779 | 8.44E-05    | 0.000638316 |
| 211209_x_at | 0.044743337 | 1.242830809 | 0.218883088 | 0.385621678 |

|             |             |             |             |             |
|-------------|-------------|-------------|-------------|-------------|
| 211210_x_at | 0.047361529 | 1.303022364 | 0.19766702  | 0.358644627 |
| 211211_x_at | 0.035104737 | 1.030482226 | 0.307020629 | 0.487186175 |
| 211212_s_at | -0.10657272 | -3.80017956 | 0.000346508 | 0.002099243 |
| 211213_at   | -0.00569749 | -0.39392738 | 0.695065291 | 0.819333864 |
| 211214_s_at | -0.10935242 | -2.84137566 | 0.006170822 | 0.023459202 |
| 211215_x_at | -0.04880299 | -1.26121797 | 0.212231088 | 0.377303464 |
| 211217_s_at | 0.035656811 | 1.002413225 | 0.320267817 | 0.501995906 |
| 211218_at   | -0.04887997 | -1.38915338 | 0.170045662 | 0.322498652 |
| 211219_s_at | 0.122657423 | 2.02159976  | 0.047794885 | 0.12311087  |
| 211220_s_at | -0.00350999 | -0.1661134  | 0.868639844 | 0.928826967 |
| 211221_at   | 0.073058455 | 2.055239041 | 0.044324336 | 0.116095833 |
| 211222_s_at | 0.065326802 | 1.098891445 | 0.276312365 | 0.452707391 |
| 211223_at   | -0.01569938 | -0.25630233 | 0.798615561 | 0.885892313 |
| 211224_s_at | 0.012377539 | 0.415913933 | 0.678993097 | 0.8077502   |
| 211225_at   | 0.063831051 | 2.116845287 | 0.038531578 | 0.103763152 |
| 211226_at   | -0.00753903 | -0.22907248 | 0.819610646 | 0.899492645 |
| 211227_s_at | -0.14267516 | -4.11676675 | 0.000122011 | 0.000872468 |
| 211228_s_at | -0.12606955 | -3.08409778 | 0.003113212 | 0.013254802 |
| 211230_s_at | -0.15606064 | -2.40777872 | 0.019219059 | 0.059694084 |
| 211231_x_at | -0.02734868 | -0.55881868 | 0.578416001 | 0.735273702 |
| 211232_x_at | 0.079681342 | 1.606554713 | 0.113530871 | 0.239437576 |
| 211233_x_at | 0.051378848 | 0.978781881 | 0.331713694 | 0.514282856 |
| 211234_x_at | 0.073363832 | 1.717756871 | 0.0911246   | 0.202856177 |
| 211235_s_at | -0.04132062 | -0.82123618 | 0.414842253 | 0.597031677 |
| 211237_s_at | 0.008385677 | 0.255144987 | 0.799504998 | 0.88650517  |
| 211238_at   | 0.043100345 | 1.435785671 | 0.156383155 | 0.303095362 |
| 211239_s_at | -0.0235129  | -0.70459679 | 0.483853768 | 0.658878508 |
| 211240_x_at | 0.079643749 | 1.716128114 | 0.091424338 | 0.203370394 |
| 211241_at   | 0.014489982 | 0.475828336 | 0.635966841 | 0.778105291 |
| 211242_x_at | -0.00174132 | -0.03612113 | 0.971308609 | 0.985464798 |
| 211245_x_at | 0.022673657 | 0.600056913 | 0.550783117 | 0.713640421 |
| 211248_s_at | 0.058750796 | 1.944835303 | 0.056601463 | 0.140589817 |
| 211249_at   | 0.015161973 | 0.376976355 | 0.707553675 | 0.827692418 |
| 211250_s_at | 0.067243814 | 1.691788044 | 0.096001224 | 0.211016452 |
| 211251_x_at | -0.11173752 | -3.07107652 | 0.00323228  | 0.013678154 |
| 211252_x_at | -0.01567334 | -0.33544663 | 0.738486863 | 0.848269119 |
| 211253_x_at | -0.04286411 | -0.84416245 | 0.40201368  | 0.58428348  |
| 211254_x_at | 0.019428898 | 0.469159025 | 0.640697857 | 0.781625502 |
| 211255_x_at | -0.08558641 | -2.58857732 | 0.0121359   | 0.04086015  |
| 211256_x_at | -0.06496585 | -1.85459146 | 0.068691123 | 0.163373086 |
| 211257_x_at | 0.159915689 | 2.954015324 | 0.004510606 | 0.018136574 |
| 211258_s_at | -0.0211455  | -0.54963976 | 0.584656428 | 0.740232445 |
| 211259_s_at | 0.005103234 | 0.10250193  | 0.918708441 | 0.957062018 |
| 211260_at   | 0.024590609 | 0.633848348 | 0.528647674 | 0.696185659 |
| 211261_at   | 0.027410721 | 0.896106418 | 0.373864499 | 0.556947647 |
| 211262_at   | 0.065359842 | 1.367803446 | 0.176599349 | 0.331384225 |
| 211263_s_at | 0.045009363 | 0.77360877  | 0.442273678 | 0.622608626 |
| 211264_at   | -0.10344985 | -3.27045193 | 0.001801508 | 0.008354598 |
| 211265_at   | -0.02189003 | -1.22715201 | 0.224675565 | 0.391882306 |
| 211266_s_at | 0.165421801 | 3.174189264 | 0.002395231 | 0.010600877 |
| 211267_at   | 0.044168433 | 1.458776844 | 0.149969131 | 0.294185155 |
| 211269_s_at | 0.033693753 | 0.606399535 | 0.546592888 | 0.710463632 |
| 211270_x_at | 0.533538624 | 6.698013855 | 9.03E-09    | 4.16E-07    |
| 211271_x_at | 0.376683532 | 5.858465781 | 2.27E-07    | 4.76E-06    |
| 211272_s_at | -0.13816956 | -4.17817411 | 9.92E-05    | 0.000731778 |
| 211273_s_at | 0.021772131 | 0.910554898 | 0.366262413 | 0.549553473 |
| 211274_at   | 0.051780143 | 1.621350061 | 0.110314606 | 0.234446733 |
| 211275_s_at | 0.213718482 | 2.812215191 | 0.006684417 | 0.025053672 |
| 211276_at   | -0.45815451 | -6.14628038 | 7.57E-08    | 2.03E-06    |
| 211277_x_at | -0.03747014 | -0.87626754 | 0.384464629 | 0.567055784 |
| 211279_at   | 0.02935474  | 1.340132222 | 0.185378577 | 0.343030244 |
| 211280_s_at | -0.07829062 | -2.63967611 | 0.010618033 | 0.036598886 |
| 211282_x_at | -0.0026973  | -0.05687519 | 0.954838215 | 0.976761934 |
| 211284_s_at | 0.108191084 | 2.635462989 | 0.010736302 | 0.036921114 |
| 211285_s_at | -0.00350154 | -0.05352826 | 0.957493189 | 0.978270408 |
| 211286_x_at | -0.04411662 | -1.03790823 | 0.30357907  | 0.483381638 |
| 211287_x_at | -0.04185012 | -1.39994146 | 0.166806006 | 0.318095438 |
| 211289_x_at | 0.067429096 | 1.577444382 | 0.120079964 | 0.249644776 |
| 211295_x_at | 0.039157899 | 0.768588445 | 0.445225983 | 0.625429502 |
| 211296_x_at | -0.03608052 | -0.89010177 | 0.377053106 | 0.559730865 |
| 211297_s_at | -0.2512264  | -3.47631716 | 0.000964367 | 0.004948845 |
| 211298_s_at | -0.08214111 | -2.71257014 | 0.008751336 | 0.031289177 |
| 211299_s_at | -0.06962267 | -2.61530881 | 0.011318846 | 0.038565362 |
| 211300_s_at | 0.053446473 | 2.315335795 | 0.024117468 | 0.071651791 |
| 211301_at   | -0.00934808 | -0.25863599 | 0.796822934 | 0.884694572 |

|             |             |             |             |             |
|-------------|-------------|-------------|-------------|-------------|
| 211302_s_at | -0.30610613 | -2.64954903 | 0.010345528 | 0.035836485 |
| 211303_x_at | 0.085104094 | 0.743608256 | 0.460086375 | 0.638577027 |
| 211304_x_at | 0.051060778 | 1.223922928 | 0.225882366 | 0.393425078 |
| 211305_x_at | -0.00225508 | -0.08397522 | 0.933362517 | 0.965360791 |
| 211306_s_at | -0.00012022 | -0.0053224  | 0.995771445 | 0.997954523 |
| 211307_s_at | 0.048846166 | 1.44511884  | 0.153754126 | 0.299467419 |
| 211310_at   | 0.003335537 | 0.147274218 | 0.883421413 | 0.937677998 |
| 211312_s_at | -0.04243719 | -0.78985261 | 0.432800246 | 0.61368764  |
| 211313_s_at | -0.07415104 | -1.08776186 | 0.281156566 | 0.45837556  |
| 211314_at   | -0.07829942 | -1.4622508  | 0.149018129 | 0.292846333 |
| 211315_s_at | -0.00568072 | -0.14391774 | 0.886059503 | 0.938983978 |
| 211316_x_at | 0.352002326 | 6.649739671 | 1.09E-08    | 4.76E-07    |
| 211317_s_at | 0.125355884 | 1.720904938 | 0.090547562 | 0.201843068 |
| 211318_s_at | -0.04723031 | -1.06754336 | 0.290107325 | 0.468389024 |
| 211319_at   | -0.05428315 | -1.79019727 | 0.078591595 | 0.181052348 |
| 211320_s_at | -0.00334328 | -0.08422863 | 0.933161908 | 0.965310623 |
| 211322_s_at | -0.09297    | -1.95122462 | 0.055818986 | 0.139094626 |
| 211323_s_at | -1.07747377 | -7.58225248 | 2.91E-10    | 4.16E-08    |
| 211324_s_at | -0.02013825 | -1.11943007 | 0.267526793 | 0.442766372 |
| 211325_x_at | -0.06769637 | -1.47176575 | 0.146437564 | 0.289097429 |
| 211326_x_at | 0.019158791 | 0.495705375 | 0.621957355 | 0.767711163 |
| 211327_x_at | 0.125231942 | 3.617620063 | 0.000620626 | 0.003434926 |
| 211328_x_at | 0.014083212 | 0.43910489  | 0.662201367 | 0.796061458 |
| 211329_x_at | 0.124838242 | 3.565582298 | 0.000730788 | 0.003936409 |
| 211330_s_at | 0.072246595 | 2.485754029 | 0.015802139 | 0.050774981 |
| 211331_x_at | 0.009909359 | 0.249103383 | 0.804152362 | 0.889671684 |
| 211332_x_at | 0.001605974 | 0.036495482 | 0.971011392 | 0.985267245 |
| 211333_s_at | -0.03371691 | -0.92734143 | 0.357555304 | 0.540609007 |
| 211334_at   | -0.00275148 | -0.09469883 | 0.924877307 | 0.960644617 |
| 211336_x_at | -0.010724   | -0.23128496 | 0.817899571 | 0.898298624 |
| 211337_s_at | -0.49088027 | -8.02429374 | 5.23E-11    | 1.42E-08    |
| 211338_at   | 0.022927064 | 0.888485136 | 0.377914506 | 0.560423139 |
| 211339_s_at | -0.04103833 | -1.60816106 | 0.113178051 | 0.238862555 |
| 211340_s_at | 0.057113361 | 0.644526564 | 0.521750607 | 0.690599085 |
| 211341_at   | 0.072244151 | 3.123198288 | 0.002779861 | 0.012049398 |
| 211342_x_at | 0.147694645 | 3.69926149  | 0.000479098 | 0.002762512 |
| 211343_s_at | 0.025959067 | 1.302480161 | 0.197850991 | 0.358885668 |
| 211345_x_at | -0.02600401 | -0.66574525 | 0.508187654 | 0.679346813 |
| 211347_at   | -0.26137492 | -6.47876479 | 2.11E-08    | 7.64E-07    |
| 211348_s_at | -0.24566712 | -5.56803027 | 6.78E-07    | 1.16E-05    |
| 211349_at   | -0.00999491 | -0.26488951 | 0.792024645 | 0.881513272 |
| 211350_s_at | 0.030187685 | 0.785231996 | 0.435482664 | 0.61606075  |
| 211351_at   | 0.015213498 | 0.893088909 | 0.375464721 | 0.558411625 |
| 211352_s_at | 0.073489482 | 1.725869821 | 0.089643635 | 0.200411428 |
| 211353_at   | -0.02882882 | -0.71464908 | 0.477664908 | 0.653260857 |
| 211354_s_at | -0.09377485 | -1.87626422 | 0.065604733 | 0.15775351  |
| 211355_x_at | -0.04359985 | -0.83767918 | 0.405616469 | 0.587916301 |
| 211356_x_at | -0.05205161 | -0.94403218 | 0.349031529 | 0.532139712 |
| 211357_s_at | -0.03007437 | -0.9085764  | 0.36729752  | 0.550515151 |
| 211358_s_at | 0.052050034 | 1.816584376 | 0.074399117 | 0.173559106 |
| 211359_s_at | -0.12468694 | -1.93464925 | 0.057868271 | 0.142926154 |
| 211360_s_at | 0.02328792  | 0.617093317 | 0.53956495  | 0.705280242 |
| 211361_s_at | 0.000156173 | 0.008344212 | 0.993370718 | 0.997061131 |
| 211362_s_at | -0.06254851 | -1.58700762 | 0.117895788 | 0.246445209 |
| 211363_s_at | 0.011831122 | 0.480298254 | 0.6328045   | 0.775956834 |
| 211364_at   | -0.01224647 | -0.26538608 | 0.791643974 | 0.881331021 |
| 211365_s_at | 0.008904102 | 0.26723197  | 0.790229359 | 0.880523835 |
| 211366_x_at | 0.027012816 | 0.484547697 | 0.62980451  | 0.773849371 |
| 211367_s_at | -0.01644331 | -0.43960017 | 0.661844608 | 0.795773338 |
| 211368_s_at | 0.042502197 | 0.98193446  | 0.330171245 | 0.512735442 |
| 211369_at   | 0.027366818 | 1.040240764 | 0.302503513 | 0.482121867 |
| 211370_s_at | -0.13014599 | -2.9111998  | 0.00508558  | 0.019982137 |
| 211371_at   | -0.03888317 | -0.95680081 | 0.342600846 | 0.52553688  |
| 211372_s_at | 0.032787565 | 0.642687641 | 0.522934976 | 0.691675099 |
| 211373_s_at | -0.10111009 | -2.3814871  | 0.020512487 | 0.062846648 |
| 211374_x_at | 0.202287809 | 5.140866815 | 3.30E-06    | 4.28E-05    |
| 211375_s_at | 0.12288869  | 1.919551899 | 0.059790299 | 0.146627965 |
| 211376_s_at | -0.19011631 | -3.99248316 | 0.000184683 | 0.001232655 |
| 211377_x_at | 0.023725207 | 0.747418657 | 0.457801373 | 0.636526095 |
| 211378_x_at | -0.26595547 | -4.91764899 | 7.44E-06    | 8.38E-05    |
| 211379_x_at | -0.2953123  | -2.9131695  | 0.005057703 | 0.019903042 |
| 211380_s_at | 0.013612212 | 0.238167039 | 0.812582864 | 0.894823342 |
| 211381_x_at | -0.06619336 | -1.28102591 | 0.205233999 | 0.368440163 |
| 211382_s_at | -0.19133065 | -3.51952484 | 0.000843613 | 0.004421573 |
| 211383_s_at | 0.043529537 | 0.761932801 | 0.449157684 | 0.628581657 |



|             |             |             |             |             |
|-------------|-------------|-------------|-------------|-------------|
| 211384_s_at | -0.03373819 | -0.66287424 | 0.51001164  | 0.680889002 |
| 211385_x_at | -0.01588584 | -0.446776   | 0.656684597 | 0.792246502 |
| 211386_at   | 0.212957349 | 4.764383116 | 1.29E-05    | 0.000131813 |
| 211387_x_at | 0.147002431 | 3.912924847 | 0.000240041 | 0.00154137  |
| 211388_s_at | 0.012849261 | 0.37229038  | 0.711020453 | 0.830270062 |
| 211389_x_at | 0.017733445 | 0.353261593 | 0.725160743 | 0.839390934 |
| 211390_at   | 0.001399708 | 0.051573415 | 0.959044105 | 0.979045934 |
| 211391_s_at | -0.04364801 | -1.12363161 | 0.265754084 | 0.440959599 |
| 211392_s_at | -0.00894307 | -0.22773269 | 0.820647235 | 0.900342847 |
| 211393_at   | -0.01046394 | -0.31876028 | 0.751042361 | 0.856799991 |
| 211395_x_at | 0.056299823 | 1.264186917 | 0.211171195 | 0.376047458 |
| 211396_at   | 0.074211757 | 1.490439756 | 0.141475043 | 0.282129428 |
| 211397_x_at | 0.006163826 | 0.117971437 | 0.906493965 | 0.950363092 |
| 211398_at   | -0.02449086 | -0.51530475 | 0.608279754 | 0.757713327 |
| 211399_at   | 0.035564869 | 1.10722875  | 0.27272197  | 0.448782734 |
| 211400_at   | -0.010121   | -0.29294195 | 0.770601965 | 0.868746406 |
| 211401_s_at | 0.026570549 | 0.345365332 | 0.731057133 | 0.84313709  |
| 211402_x_at | -0.02446417 | -0.61627334 | 0.540102193 | 0.705720987 |
| 211403_x_at | -0.02674035 | -0.63542857 | 0.527624011 | 0.695551068 |
| 211404_s_at | -0.23194694 | -3.55107854 | 0.000764668 | 0.004083956 |
| 211405_x_at | 0.000485638 | 0.011536951 | 0.99083426  | 0.995691072 |
| 211406_at   | 0.00915405  | 0.152327747 | 0.879452007 | 0.9353085   |
| 211407_at   | 0.017382775 | 0.601362507 | 0.549919257 | 0.712913831 |
| 211410_x_at | -0.04026459 | -0.79593177 | 0.429286075 | 0.610308349 |
| 211411_at   | 0.001953261 | 0.059243593 | 0.952959777 | 0.97586505  |
| 211412_at   | -0.03798342 | -1.07830066 | 0.285320841 | 0.463086833 |
| 211413_s_at | 0.036083023 | 1.100895929 | 0.275446145 | 0.451851384 |
| 211414_at   | -0.00782487 | -0.26094018 | 0.795054017 | 0.883498785 |
| 211416_x_at | 0.06015826  | 1.232172121 | 0.222808797 | 0.389955952 |
| 211417_x_at | 0.003939768 | 0.078402862 | 0.937774859 | 0.96750215  |
| 211419_s_at | -0.18838355 | -3.83299408 | 0.000311566 | 0.001921151 |
| 211421_s_at | -0.01565141 | -0.77463111 | 0.441673878 | 0.622003748 |
| 211422_at   | 0.14566165  | 3.90637353  | 0.000245252 | 0.001568518 |
| 211423_s_at | -0.21662377 | -2.91524735 | 0.005028448 | 0.019807105 |
| 211424_x_at | 0.200267717 | 3.553632773 | 0.000758595 | 0.004060741 |
| 211425_x_at | -0.00785242 | -0.1686604  | 0.86664491  | 0.927869789 |
| 211426_x_at | -0.1796952  | -4.59992315 | 2.31E-05    | 0.000215491 |
| 211427_s_at | -0.00149676 | -0.06507388 | 0.948336791 | 0.973540091 |
| 211428_at   | -0.03893787 | -1.33050001 | 0.188511068 | 0.346762292 |
| 211429_s_at | 0.303689048 | 2.587077728 | 0.012183286 | 0.040991899 |
| 211430_s_at | 0.138491321 | 2.075132978 | 0.042376276 | 0.111984421 |
| 211431_s_at | -0.08745234 | -1.93987064 | 0.057215915 | 0.141769345 |
| 211432_s_at | 0.020083828 | 0.417410103 | 0.677904714 | 0.80684201  |
| 211433_x_at | -0.09382353 | -2.4400727  | 0.017730684 | 0.055847468 |
| 211434_s_at | -0.00700073 | -0.18009257 | 0.857701587 | 0.922383359 |
| 211435_at   | 0.017254215 | 0.549422194 | 0.58480473  | 0.740283863 |
| 211436_at   | -0.01328348 | -0.4456457  | 0.657496264 | 0.792706117 |
| 211437_at   | -0.01384889 | -0.63252418 | 0.529506265 | 0.697004418 |
| 211438_at   | 0.055125197 | 1.19731437  | 0.236007792 | 0.405118306 |
| 211439_at   | 0.032743089 | 0.775618173 | 0.441095234 | 0.621404242 |
| 211440_x_at | -0.00671359 | -0.18569956 | 0.853322036 | 0.919588155 |
| 211441_x_at | -0.04531599 | -1.43648611 | 0.156184643 | 0.302841948 |
| 211442_x_at | -0.02781044 | -0.83676263 | 0.406127393 | 0.588446927 |
| 211444_at   | -0.05167687 | -1.55941137 | 0.124286917 | 0.256399539 |
| 211445_x_at | 0.079492067 | 3.610130642 | 0.000635443 | 0.003504776 |
| 211446_at   | -0.01236766 | -0.40791405 | 0.684824192 | 0.811554711 |
| 211447_s_at | -0.17201177 | -3.48115759 | 0.000950064 | 0.00488608  |
| 211448_s_at | -0.02055804 | -0.35223268 | 0.725928129 | 0.839909388 |
| 211449_at   | 0.028466095 | 1.522664633 | 0.133224235 | 0.270025284 |
| 211450_s_at | 0.026900212 | 0.412530362 | 0.681456994 | 0.809471484 |
| 211451_s_at | -0.52119388 | -6.78845705 | 6.36E-09    | 3.27E-07    |
| 211452_x_at | 0.392979891 | 5.199777484 | 2.66E-06    | 3.58E-05    |
| 211453_s_at | 0.013565026 | 0.505861067 | 0.61485298  | 0.763029417 |
| 211454_x_at | -0.03794774 | -0.94529272 | 0.348393202 | 0.531503294 |
| 211455_at   | 0.00149214  | 0.076287459 | 0.939450413 | 0.968333385 |
| 211456_x_at | 0.415253492 | 5.201431365 | 2.64E-06    | 3.56E-05    |
| 211457_at   | -0.11543215 | -2.18855311 | 0.032629994 | 0.091053544 |
| 211458_s_at | -0.52599847 | -6.22176527 | 5.67E-08    | 1.62E-06    |
| 211459_at   | -0.01588945 | -0.69042912 | 0.492651601 | 0.666440737 |
| 211460_at   | -0.03897321 | -0.82574244 | 0.412301315 | 0.594578116 |
| 211461_at   | -0.00934404 | -0.30882554 | 0.758550161 | 0.86112413  |
| 211462_s_at | 0.008923305 | 0.295633448 | 0.768555672 | 0.867402967 |
| 211463_at   | 0.006596023 | 0.211075864 | 0.833560811 | 0.908001846 |
| 211464_x_at | 0.168505484 | 5.882285869 | 2.07E-07    | 4.43E-06    |
| 211465_x_at | -0.02580081 | -0.58760212 | 0.559058224 | 0.720726632 |

|             |             |             |             |              |
|-------------|-------------|-------------|-------------|--------------|
| 211466_at   | 0.219573828 | 4.817449008 | 1.07E-05    | 0.00011255   |
| 211467_s_at | 0.081472005 | 1.858954955 | 0.068060065 | 0.162269755  |
| 211468_s_at | 0.080443293 | 2.07755755  | 0.04214401  | 0.111489293  |
| 211469_s_at | -0.02919277 | -0.56837077 | 0.571956174 | 0.730334125  |
| 211470_s_at | 0.026927138 | 0.963026095 | 0.339493953 | 0.522344779  |
| 211471_s_at | 0.026977096 | 0.609182256 | 0.54475962  | 0.709103717  |
| 211472_at   | 0.032733144 | 0.837914944 | 0.405485107 | 0.587840288  |
| 211473_s_at | 0.094091146 | 2.369280498 | 0.021139045 | 0.064423174  |
| 211474_s_at | 0.475965785 | 6.522748398 | 1.78E-08    | 6.77E-07     |
| 211475_s_at | -0.15387876 | -3.19041517 | 0.002283714 | 0.010187017  |
| 211476_at   | -0.00915456 | -0.3966739  | 0.693049691 | 0.81789746   |
| 211478_s_at | -0.02455865 | -0.94658535 | 0.347739421 | 0.530759543  |
| 211479_s_at | -1.14306107 | -5.66964641 | 4.63E-07    | 8.50E-06     |
| 211480_s_at | -0.01999069 | -0.21440154 | 0.830978705 | 0.906426347  |
| 211481_at   | 0.12994532  | 2.925901328 | 0.004880898 | 0.019343541  |
| 211483_x_at | -0.95737063 | -6.45295317 | 2.33E-08    | 8.23E-07     |
| 211484_s_at | -0.05113257 | -0.89676158 | 0.373517634 | 0.556608652  |
| 211485_s_at | -0.02646041 | -0.69897116 | 0.487336668 | 0.661705921  |
| 211486_s_at | -0.11662035 | -2.92805279 | 0.004851594 | 0.019249595  |
| 211487_x_at | 0.009271816 | 0.191410097 | 0.848866367 | 0.916996171  |
| 211488_s_at | 0.239966484 | 4.281060301 | 6.99E-05    | 0.000544463  |
| 211489_at   | 0.035306984 | 0.927266019 | 0.357594117 | 0.540631112  |
| 211490_at   | 0.014224529 | 0.414926653 | 0.679711667 | 0.808127799  |
| 211491_at   | 0.018121451 | 0.584418525 | 0.561183338 | 0.722653309  |
| 211492_s_at | -0.04004658 | -1.26557789 | 0.21067598  | 0.375449833  |
| 211493_x_at | 0.331454725 | 3.889043939 | 0.000259565 | 0.001644525  |
| 211494_s_at | 0.045441381 | 0.726702861 | 0.470302703 | 0.646990132  |
| 211495_x_at | 0.036162995 | 0.599964373 | 0.550844372 | 0.71365366   |
| 211496_s_at | -0.03795953 | -1.47569774 | 0.145381459 | 0.287647785  |
| 211497_x_at | -0.0177827  | -0.34204709 | 0.733539868 | 0.844755503  |
| 211498_s_at | -0.06824011 | -1.37970167 | 0.172923577 | 0.326419179  |
| 211499_s_at | -0.10825031 | -1.629348   | 0.108606964 | 0.231732189  |
| 211500_at   | 0.024237864 | 0.628728665 | 0.53197129  | 0.69906599   |
| 211501_s_at | 0.11654497  | 2.410131149 | 0.019106971 | 0.059399607  |
| 211502_s_at | -0.04393074 | -1.48024652 | 0.144167162 | 0.285992223  |
| 211503_s_at | 0.193060497 | 3.120761853 | 0.002799616 | 0.012124071  |
| 211504_x_at | -0.21972084 | -4.92285738 | 7.30E-06    | 8.25E-05     |
| 211505_s_at | -0.12389332 | -1.99628558 | 0.050558738 | 0.128574663  |
| 211506_s_at | 0.036897956 | 1.009097704 | 0.3170788   | 0.498343147  |
| 211507_s_at | 0.027601642 | 0.704720174 | 0.483777538 | 0.658794775  |
| 211508_s_at | -0.0231152  | -0.83699259 | 0.405999166 | 0.588374224  |
| 211509_s_at | -0.29964748 | -5.06407441 | 4.37E-06    | 5.41E-05     |
| 211510_s_at | -0.02264956 | -0.61041897 | 0.543945875 | 0.708449078  |
| 211512_s_at | -0.06938529 | -1.06886141 | 0.28951789  | 0.467758425  |
| 211513_s_at | -0.09150673 | -1.70284488 | 0.093899296 | 0.207585443  |
| 211514_at   | -0.03729595 | -1.53507239 | 0.130151084 | 0.265436644  |
| 211515_s_at | -0.18924715 | -3.88874685 | 0.000259817 | 0.00164589   |
| 211516_at   | 0.030279479 | 0.85907536  | 0.393801562 | 0.57644389   |
| 211517_s_at | 0.048074113 | 1.681989457 | 0.097896096 | 0.214039055  |
| 211518_s_at | 0.002288487 | 0.049262582 | 0.960877658 | 0.9801110562 |
| 211519_s_at | -0.00164795 | -0.04277535 | 0.96602612  | 0.982693116  |
| 211520_s_at | -0.27083605 | -6.59447228 | 1.35E-08    | 5.59E-07     |
| 211521_s_at | 0.051502867 | 1.39517456  | 0.168231588 | 0.320076584  |
| 211522_s_at | -0.06547065 | -2.18116025 | 0.033199364 | 0.092366073  |
| 211523_at   | -0.00223571 | -0.07818988 | 0.937943543 | 0.96750215   |
| 211524_at   | -0.00963661 | -0.2267506  | 0.821407275 | 0.900712366  |
| 211525_s_at | 0.021066356 | 0.826665703 | 0.41178189  | 0.594039904  |
| 211526_s_at | 0.02288512  | 1.188167037 | 0.239563629 | 0.409445015  |
| 211527_x_at | -0.13541537 | -1.44048008 | 0.155056463 | 0.301334236  |
| 211528_x_at | 0.208744396 | 2.806113843 | 0.006796747 | 0.025412885  |
| 211529_x_at | 0.222904207 | 2.900719308 | 0.005236322 | 0.020458232  |
| 211530_x_at | 0.096359616 | 1.498484644 | 0.139378425 | 0.279056562  |
| 211531_x_at | -0.0871149  | -1.37901405 | 0.173134396 | 0.326671055  |
| 211532_x_at | -0.0114913  | -0.24497756 | 0.807330152 | 0.891598279  |
| 211533_at   | -0.05251062 | -1.42086982 | 0.160657188 | 0.30926007   |
| 211534_x_at | -0.3939427  | -6.9058394  | 4.04E-09    | 2.38E-07     |
| 211535_s_at | 0.465660431 | 6.374066545 | 3.16E-08    | 1.03E-06     |
| 211536_x_at | -0.03002123 | -0.69631155 | 0.488988091 | 0.663383898  |
| 211537_x_at | -0.06404577 | -1.28458508 | 0.203995174 | 0.366995027  |
| 211538_s_at | 0.515949543 | 5.096946621 | 3.88E-06    | 4.89E-05     |
| 211540_s_at | -0.09521255 | -2.43347703 | 0.018025969 | 0.056660424  |
| 211541_s_at | -0.03021215 | -0.71691708 | 0.476274734 | 0.65213451   |
| 211542_x_at | 0.022772392 | 0.635256559 | 0.527735391 | 0.695574793  |
| 211543_s_at | -0.03063435 | -0.90625427 | 0.368514787 | 0.551716365  |
| 211544_s_at | 0.006816715 | 0.167922495 | 0.867222785 | 0.92815558   |

|             |             |             |             |             |
|-------------|-------------|-------------|-------------|-------------|
| 211545_at   | -0.02447727 | -0.65455361 | 0.515317615 | 0.685576603 |
| 211546_x_at | -0.24336436 | -4.43157231 | 4.16E-05    | 0.000353531 |
| 211547_s_at | -0.55305611 | -3.90875241 | 0.000243348 | 0.001559239 |
| 211548_s_at | -0.02679831 | -1.02061089 | 0.311636358 | 0.492560904 |
| 211549_s_at | -0.00735545 | -0.29278255 | 0.7707232   | 0.868774245 |
| 211550_at   | -0.01257914 | -0.35639705 | 0.722824006 | 0.838075299 |
| 211551_at   | 0.030079904 | 0.836884624 | 0.406059363 | 0.588386508 |
| 211552_s_at | 0.196945947 | 3.290324305 | 0.001697614 | 0.007943647 |
| 211553_x_at | 0.005458244 | 0.175719406 | 0.861120546 | 0.92430289  |
| 211554_s_at | 0.02642392  | 0.707740705 | 0.481913383 | 0.657077092 |
| 211555_s_at | -1.0571521  | -7.53688911 | 3.47E-10    | 4.66E-08    |
| 211556_at   | -0.02663016 | -1.06803477 | 0.289887471 | 0.46810001  |
| 211557_x_at | 0.041224612 | 0.610426829 | 0.543940704 | 0.708449078 |
| 211558_s_at | -0.15410892 | -2.91947022 | 0.004969476 | 0.019623673 |
| 211559_s_at | -0.3607178  | -4.49177974 | 3.38E-05    | 0.000296462 |
| 211560_s_at | -0.04005338 | -0.68270908 | 0.497482363 | 0.670632575 |
| 211561_x_at | -0.09699376 | -1.97438904 | 0.05305916  | 0.133597089 |
| 211562_s_at | 0.04708036  | 1.65390896  | 0.103496671 | 0.223409641 |
| 211563_s_at | 0.120411336 | 3.42370202  | 0.001133619 | 0.005650646 |
| 211564_s_at | 0.397100591 | 2.607236927 | 0.011560125 | 0.039267698 |
| 211565_at   | -0.07460814 | -1.75422932 | 0.084622216 | 0.191723414 |
| 211566_x_at | -0.10571547 | -3.3480164  | 0.001427101 | 0.006874325 |
| 211567_at   | -0.04182813 | -1.1579999  | 0.251564666 | 0.424511173 |
| 211568_at   | -0.05845768 | -1.39605664 | 0.16796709  | 0.319711397 |
| 211569_s_at | -0.00184972 | -0.02421664 | 0.980762131 | 0.99031249  |
| 211570_s_at | 0.01781249  | 0.67106748  | 0.504815685 | 0.676752041 |
| 211571_s_at | 0.635719001 | 5.022696627 | 5.08E-06    | 6.10E-05    |
| 211572_s_at | -0.05565333 | -1.57396521 | 0.1208826   | 0.250928246 |
| 211573_x_at | -0.00802333 | -0.12863357 | 0.898088319 | 0.945420644 |
| 211574_s_at | 0.014371634 | 0.361649753 | 0.718915304 | 0.835548715 |
| 211575_s_at | -0.09199177 | -2.35969111 | 0.0216432   | 0.065649375 |
| 211576_s_at | 0.096016111 | 2.172807988 | 0.033853098 | 0.093763178 |
| 211577_s_at | -0.02042867 | -0.44370253 | 0.658892632 | 0.793874247 |
| 211578_s_at | 0.055399683 | 1.340752705 | 0.185178151 | 0.342719146 |
| 211579_at   | 0.017473172 | 0.665839366 | 0.508127919 | 0.679307597 |
| 211580_s_at | 0.021919111 | 0.634923094 | 0.527951346 | 0.695724584 |
| 211581_x_at | 0.035450571 | 0.808459124 | 0.422098275 | 0.604067249 |
| 211582_x_at | 0.106267643 | 2.550865604 | 0.013379828 | 0.044254832 |
| 211583_x_at | -0.00501403 | -0.13777122 | 0.890893806 | 0.941628654 |
| 211584_s_at | -0.01256938 | -0.48827952 | 0.627175102 | 0.771849364 |
| 211585_at   | -0.03336931 | -0.93313324 | 0.35458238  | 0.537691326 |
| 211586_s_at | -0.57824546 | -8.26360545 | 2.07E-11    | 8.64E-09    |
| 211587_x_at | 0.010044008 | 0.28672633  | 0.77533381  | 0.871312294 |
| 211588_s_at | -0.01467316 | -0.39163039 | 0.69675269  | 0.820503307 |
| 211589_at   | -0.09791624 | -1.42673653 | 0.158965443 | 0.306862628 |
| 211590_x_at | 0.0112744   | 0.286420704 | 0.7755667   | 0.871552098 |
| 211591_s_at | -0.0909753  | -2.10593895 | 0.039506294 | 0.105839546 |
| 211592_s_at | -0.05302289 | -2.18172336 | 0.03315569  | 0.092277626 |
| 211593_s_at | 0.083843322 | 2.461817124 | 0.016787742 | 0.053392951 |
| 211594_s_at | -0.01216973 | -0.40834313 | 0.684510939 | 0.811311085 |
| 211595_s_at | -0.11320167 | -2.64711617 | 0.010412079 | 0.036027921 |
| 211596_s_at | 0.59465073  | 4.598562698 | 2.32E-05    | 0.000216391 |
| 211597_s_at | -0.37569463 | -3.48891305 | 0.000927567 | 0.004788588 |
| 211598_x_at | 0.026040458 | 0.63896289  | 0.525338255 | 0.693747508 |
| 211599_x_at | 0.04844625  | 1.244587057 | 0.218241163 | 0.384743562 |
| 211600_at   | -0.03832667 | -0.84877305 | 0.39946357  | 0.581775347 |
| 211601_at   | 0.030006623 | 0.927922973 | 0.357256073 | 0.540343296 |
| 211602_s_at | -0.08966633 | -2.12444297 | 0.037865011 | 0.102406237 |
| 211603_s_at | 0.012273865 | 0.209201278 | 0.835017083 | 0.908960441 |
| 211604_x_at | 0.07149153  | 2.033978275 | 0.046491462 | 0.120493878 |
| 211605_s_at | 0.031686228 | 0.751906376 | 0.455118596 | 0.634123965 |
| 211606_at   | -0.03468692 | -0.93349672 | 0.354396339 | 0.537540196 |
| 211607_x_at | -0.08101098 | -1.84462767 | 0.070150615 | 0.165961107 |
| 211608_at   | 0.019809549 | 0.651361389 | 0.517361035 | 0.686986344 |
| 211609_x_at | -0.07608005 | -1.66234087 | 0.101788141 | 0.220659468 |
| 211610_at   | 0.122362873 | 3.098542311 | 0.002985934 | 0.012792115 |
| 211611_s_at | 0.006639865 | 0.213217651 | 0.83189768  | 0.907144808 |
| 211612_s_at | 0.115176102 | 1.596046847 | 0.115860797 | 0.243192314 |
| 211613_s_at | 0.006504802 | 0.132394853 | 0.895125806 | 0.943885127 |
| 211614_at   | -0.03517033 | -0.51885385 | 0.605817752 | 0.755720741 |
| 211615_s_at | -0.34800777 | -4.31088033 | 6.31E-05    | 0.000499893 |
| 211616_s_at | -0.20281898 | -3.08033468 | 0.003147194 | 0.013370189 |
| 211617_at   | -0.0313304  | -0.70310909 | 0.484773477 | 0.659628443 |
| 211618_s_at | 0.004508121 | 0.142838496 | 0.886908028 | 0.939259581 |
| 211619_s_at | -0.01598256 | -0.44040968 | 0.661261674 | 0.795421939 |

|             |             |             |             |             |
|-------------|-------------|-------------|-------------|-------------|
| 211620_x_at | -0.02776739 | -0.8421115  | 0.403151272 | 0.585463417 |
| 211621_at   | 0.03587937  | 1.051104362 | 0.297528466 | 0.476600079 |
| 211622_s_at | -0.61956651 | -8.60291188 | 5.59E-12    | 4.41E-09    |
| 211623_s_at | 0.029322931 | 0.599742085 | 0.550991528 | 0.713732046 |
| 211624_s_at | -0.50712149 | -8.57385485 | 6.25E-12    | 4.50E-09    |
| 211625_s_at | -0.05591396 | -1.84186526 | 0.070559843 | 0.166611745 |
| 211626_x_at | 0.009826927 | 0.19036252  | 0.849683377 | 0.917513518 |
| 211627_x_at | -0.01392131 | -0.28677698 | 0.775295216 | 0.871312294 |
| 211628_x_at | 0.126632134 | 2.578019083 | 0.012473124 | 0.041772114 |
| 211630_s_at | -0.13243691 | -3.71017744 | 0.000462697 | 0.002683128 |
| 211631_x_at | 0.000494401 | 0.012359095 | 0.990181125 | 0.995348062 |
| 211632_at   | -0.12213798 | -2.39287549 | 0.019942959 | 0.061446581 |
| 211633_x_at | -0.00029645 | -0.00982926 | 0.992190916 | 0.996404657 |
| 211634_x_at | 0.047083062 | 1.298643732 | 0.199156377 | 0.36065873  |
| 211635_x_at | 0.027482876 | 0.831140226 | 0.409270171 | 0.591466531 |
| 211636_at   | -0.02711874 | -0.81191746 | 0.420126809 | 0.602275271 |
| 211637_x_at | 0.018582487 | 0.746673401 | 0.45824777  | 0.636855816 |
| 211638_at   | -0.03897022 | -1.27530114 | 0.207238354 | 0.370980395 |
| 211639_x_at | 0.011083972 | 0.340950508 | 0.734360967 | 0.845311397 |
| 211640_x_at | -0.01624569 | -0.46255796 | 0.645395254 | 0.784849519 |
| 211641_x_at | 0.004304784 | 0.132463966 | 0.895071384 | 0.943856597 |
| 211642_at   | -0.03587998 | -1.22480512 | 0.225552195 | 0.3929819   |
| 211643_x_at | 0.08267956  | 2.273404969 | 0.026684587 | 0.077566671 |
| 211644_x_at | 0.018760981 | 0.477141182 | 0.63503733  | 0.777446183 |
| 211645_x_at | -0.02342518 | -0.73220171 | 0.466965584 | 0.644303228 |
| 211646_at   | -0.0239155  | -1.00695565 | 0.318098394 | 0.499383639 |
| 211647_x_at | 0.01451743  | 0.572952557 | 0.568870161 | 0.727958346 |
| 211648_at   | 0.045884366 | 1.06323188  | 0.292041204 | 0.470512744 |
| 211649_x_at | 0.015475532 | 0.51864757  | 0.605960723 | 0.755856893 |
| 211650_x_at | 0.022556353 | 0.488012211 | 0.627363282 | 0.772017175 |
| 211651_s_at | -0.18489059 | -4.69763869 | 1.64E-05    | 0.000161369 |
| 211652_s_at | 0.036054706 | 0.684067935 | 0.496630198 | 0.669685811 |
| 211653_x_at | 0.276750158 | 4.154082222 | 0.000107609 | 0.000783525 |
| 211654_x_at | 0.257868483 | 3.297594404 | 0.001661038 | 0.007801682 |
| 211655_at   | -0.01114381 | -0.53430981 | 0.595149747 | 0.748071564 |
| 211656_x_at | 0.104617441 | 1.43848529  | 0.155619138 | 0.302073076 |
| 211657_at   | -0.01425343 | -0.36163689 | 0.71892487  | 0.835548715 |
| 211658_at   | -0.01116985 | -0.40036735 | 0.690342687 | 0.815650488 |
| 211659_at   | -0.0747871  | -1.33728923 | 0.18629901  | 0.344052695 |
| 211660_at   | -0.02279399 | -0.43627714 | 0.664239751 | 0.797501692 |
| 211661_x_at | 0.018276895 | 0.369348028 | 0.713200406 | 0.831598856 |
| 211662_s_at | -0.21467715 | -3.36270335 | 0.001365048 | 0.006615347 |
| 211663_x_at | 0.183278611 | 3.138460792 | 0.002659056 | 0.011596264 |
| 211665_s_at | -0.12029846 | -2.10340372 | 0.039735923 | 0.106333625 |
| 211666_x_at | -0.06580787 | -1.17548807 | 0.244556157 | 0.415657112 |
| 211667_x_at | -0.01531975 | -0.58249681 | 0.562468059 | 0.723382099 |
| 211668_s_at | -0.08702228 | -1.59236623 | 0.116685968 | 0.244488011 |
| 211670_x_at | -0.02765652 | -0.61475053 | 0.541100648 | 0.706515829 |
| 211671_s_at | 0.177283034 | 2.33587398  | 0.022942098 | 0.068832454 |
| 211672_s_at | -0.27451151 | -2.67973288 | 0.009551533 | 0.033609725 |
| 211673_s_at | 0.054230224 | 1.098099729 | 0.276655022 | 0.453135904 |
| 211674_x_at | -0.00967531 | -0.32253767 | 0.74819403  | 0.854849361 |
| 211675_s_at | 0.484600412 | 4.92290329  | 7.30E-06    | 8.25E-05    |
| 211676_s_at | 0.177443801 | 1.690706231 | 0.096208937 | 0.211358961 |
| 211677_x_at | -0.22175273 | -5.0468431  | 4.66E-06    | 5.69E-05    |
| 211678_s_at | 0.46099154  | 5.702041684 | 4.09E-07    | 7.71E-06    |
| 211679_x_at | -0.20739929 | -2.95770792 | 0.004463958 | 0.017973264 |
| 211680_at   | -0.01532541 | -0.88001887 | 0.382445918 | 0.565131738 |
| 211681_s_at | 0.083303569 | 1.644386604 | 0.10545419  | 0.226649931 |
| 211682_x_at | -0.0477604  | -0.97070362 | 0.335687887 | 0.518509816 |
| 211684_s_at | 0.09403743  | 1.395846819 | 0.168029977 | 0.31977106  |
| 211685_s_at | 0.003897595 | 0.045616481 | 0.96377112  | 0.981363824 |
| 211686_s_at | -0.21295247 | -3.92925403 | 0.000227514 | 0.001472115 |
| 211687_x_at | 0.006884047 | 0.171093637 | 0.864739895 | 0.926741053 |
| 211688_x_at | -0.02027261 | -0.40243053 | 0.688832301 | 0.814641259 |
| 211689_s_at | -0.02274008 | -0.69898722 | 0.487326706 | 0.661705921 |
| 211690_at   | -0.02267971 | -0.51474967 | 0.608665227 | 0.758045599 |
| 211691_x_at | -0.02320332 | -0.6622326  | 0.510419762 | 0.681291402 |
| 211692_s_at | -0.03591305 | -0.49757825 | 0.620644446 | 0.767149943 |
| 211693_at   | 0.050013303 | 0.948382352 | 0.346831867 | 0.529829974 |
| 211694_at   | 0.00313305  | 0.073676883 | 0.941518557 | 0.969641107 |
| 211695_x_at | 0.024632587 | 0.46924505  | 0.640636738 | 0.781601251 |
| 211696_x_at | -0.24413604 | -1.00241659 | 0.320266208 | 0.501995906 |
| 211697_x_at | -0.12967612 | -2.36051746 | 0.021599336 | 0.065556369 |
| 211698_at   | -0.03041254 | -0.32118059 | 0.749216927 | 0.855371334 |

|             |             |             |             |             |
|-------------|-------------|-------------|-------------|-------------|
| 211699_x_at | -0.01756389 | -0.07820079 | 0.937934902 | 0.96750215  |
| 211700_s_at | 0.211914786 | 2.404882891 | 0.019357847 | 0.060037538 |
| 211701_s_at | 0.054850641 | 1.26776199  | 0.209900136 | 0.374515206 |
| 211702_s_at | -0.01810773 | -0.69225125 | 0.491515184 | 0.665559661 |
| 211703_s_at | -0.27657603 | -2.81649938 | 0.006606569 | 0.024813914 |
| 211704_s_at | -0.12595158 | -3.26625629 | 0.001824196 | 0.008447515 |
| 211705_s_at | 0.024446547 | 0.679405893 | 0.499557192 | 0.672293957 |
| 211706_s_at | 0.0115245   | 0.403609892 | 0.687969498 | 0.814002894 |
| 211707_s_at | 0.11815762  | 3.287366387 | 0.001712712 | 0.008006749 |
| 211708_s_at | -0.31871388 | -2.67238063 | 0.00973963  | 0.034166682 |
| 211709_s_at | 0.137855689 | 3.67642338  | 0.000515227 | 0.002937808 |
| 211710_x_at | -0.25596007 | -6.17709898 | 6.72E-08    | 1.85E-06    |
| 211711_s_at | 0.078255909 | 2.019315989 | 0.048038772 | 0.123608083 |
| 211712_s_at | -0.04287326 | -1.67937515 | 0.098406804 | 0.214934848 |
| 211713_x_at | 0.174753109 | 2.803399138 | 0.006847283 | 0.025571888 |
| 211714_x_at | -0.23464566 | -3.57801493 | 0.000702889 | 0.00380724  |
| 211715_s_at | -0.18241305 | -3.58106704 | 0.000696197 | 0.003778691 |
| 211716_x_at | -0.22520803 | -4.80638308 | 1.11E-05    | 0.000116387 |
| 211717_at   | 0.171908778 | 5.145686459 | 3.24E-06    | 4.22E-05    |
| 211718_at   | -0.10805928 | -2.33412264 | 0.023040296 | 0.069073999 |
| 211719_x_at | 0.233758024 | 2.101299327 | 0.039927411 | 0.106705486 |
| 211720_x_at | 0.170678803 | 2.75858294  | 0.007733195 | 0.028275541 |
| 211721_s_at | 0.027412643 | 1.228005835 | 0.224357256 | 0.391464608 |
| 211722_s_at | -0.02723868 | -1.00759541 | 0.317793645 | 0.499045453 |
| 211724_x_at | 0.010197971 | 0.311954331 | 0.756183137 | 0.859741384 |
| 211725_s_at | -0.22511768 | -4.62753423 | 2.10E-05    | 0.000198986 |
| 211726_s_at | 0.296090057 | 4.186291459 | 9.65E-05    | 0.000714723 |
| 211727_s_at | -0.32072151 | -2.86644477 | 0.005758683 | 0.022143851 |
| 211728_s_at | -0.08788379 | -2.01067452 | 0.048971336 | 0.125429935 |
| 211729_x_at | 0.161624701 | 3.519892072 | 0.000842651 | 0.004419641 |
| 211730_s_at | 0.054629097 | 1.009224222 | 0.317018648 | 0.49826613  |
| 211731_x_at | 0.025434566 | 0.887623891 | 0.378373916 | 0.560943834 |
| 211732_x_at | 0.159232251 | 4.21094801  | 8.88E-05    | 0.000666031 |
| 211733_x_at | 0.2744482   | 2.586191957 | 0.012211354 | 0.041054691 |
| 211734_s_at | 0.000961247 | 0.034263345 | 0.972783665 | 0.98625639  |
| 211735_x_at | 0.009644411 | 0.330574736 | 0.742145463 | 0.850547877 |
| 211736_at   | 0.006141826 | 0.283702301 | 0.777639063 | 0.87253651  |
| 211737_x_at | -0.13521566 | -1.47716772 | 0.144988171 | 0.287110618 |
| 211738_x_at | 0.000572396 | 0.014013019 | 0.988867222 | 0.994831713 |
| 211739_x_at | 0.00565765  | 0.163340736 | 0.870812507 | 0.930237659 |
| 211740_at   | -0.02295286 | -0.83431665 | 0.40749281  | 0.589830536 |
| 211741_x_at | -0.00781316 | -0.2910376  | 0.772050794 | 0.869525076 |
| 211742_s_at | 0.222499063 | 2.201913011 | 0.031622797 | 0.088818881 |
| 211743_s_at | -0.02981167 | -0.96254644 | 0.339732676 | 0.522590099 |
| 211744_s_at | 0.085458716 | 1.670894834 | 0.100078485 | 0.217724172 |
| 211745_x_at | 0.002660795 | 0.011262227 | 0.99105251  | 0.995811798 |
| 211746_x_at | -0.31927148 | -3.74342371 | 0.000415992 | 0.002451734 |
| 211747_s_at | 0.022485046 | 0.291386196 | 0.771785518 | 0.869271324 |
| 211748_x_at | 0.188793407 | 3.256401012 | 0.001878553 | 0.008658856 |
| 211749_s_at | -0.03503081 | -0.37763332 | 0.707068133 | 0.82742764  |
| 211750_x_at | -0.02826137 | -0.40324333 | 0.688237625 | 0.814218067 |
| 211751_at   | -0.10652307 | -1.89638587 | 0.062845018 | 0.152514996 |
| 211752_s_at | -0.05195502 | -0.67076648 | 0.505006063 | 0.676814436 |
| 211753_s_at | 0.062521246 | 1.908005174 | 0.061296714 | 0.149518215 |
| 211754_s_at | -0.06211218 | -1.14780739 | 0.25571509  | 0.429107453 |
| 211755_s_at | -0.27509853 | -3.33040816 | 0.001505012 | 0.007183039 |
| 211756_at   | -0.01982947 | -0.6691679  | 0.506017802 | 0.677581124 |
| 211758_x_at | -0.17138494 | -1.96553838 | 0.054099517 | 0.135710351 |
| 211759_x_at | 0.04589424  | 0.815088988 | 0.418323727 | 0.600800951 |
| 211760_s_at | -0.14775263 | -3.6179077  | 0.000620064 | 0.003432238 |
| 211761_s_at | -0.23698582 | -2.92600941 | 0.004879422 | 0.019339406 |
| 211762_s_at | -0.15799262 | -2.11874749 | 0.038363739 | 0.103423345 |
| 211763_s_at | -0.48681168 | -4.93584828 | 6.97E-06    | 7.95E-05    |
| 211764_s_at | 0.044712929 | 1.330736886 | 0.188433555 | 0.346662514 |
| 211765_x_at | -0.27703624 | -4.69300662 | 1.66E-05    | 0.000163262 |
| 211766_s_at | -0.01352624 | -0.65846875 | 0.512817313 | 0.683552487 |
| 211767_at   | 0.045011565 | 1.133970353 | 0.261427346 | 0.435780498 |
| 211768_at   | 0.093676818 | 2.180476576 | 0.033252456 | 0.092460571 |
| 211769_x_at | -0.12785572 | -1.76706488 | 0.082427455 | 0.187778969 |
| 211771_s_at | -0.02713085 | -0.52597728 | 0.600890103 | 0.752328831 |
| 211772_x_at | -0.04481337 | -1.2203999  | 0.227204433 | 0.394767922 |
| 211773_s_at | -0.0811497  | -1.65810477 | 0.102643587 | 0.222007802 |
| 211774_s_at | -0.03893725 | -1.07259031 | 0.287854812 | 0.466048661 |
| 211775_x_at | 0.001130763 | 0.068456301 | 0.945655594 | 0.972037991 |
| 211776_s_at | -0.28510803 | -2.48970364 | 0.015644626 | 0.050355753 |

|             |             |             |             |             |
|-------------|-------------|-------------|-------------|-------------|
| 211778_s_at | 0.012945769 | 0.303548049 | 0.762547994 | 0.863479146 |
| 211779_x_at | -0.18875782 | -3.09041913 | 0.003056899 | 0.013050112 |
| 211780_x_at | -0.21952921 | -4.42847763 | 4.21E-05    | 0.000356736 |
| 211781_x_at | 0.084029024 | 2.768150562 | 0.00753566  | 0.027670997 |
| 211782_at   | -0.00811078 | -0.41808951 | 0.677410709 | 0.806533271 |
| 211783_s_at | 0.219899518 | 2.867575652 | 0.005740705 | 0.022087086 |
| 211784_s_at | 0.226260626 | 3.398295162 | 0.001225091 | 0.006041908 |
| 211786_at   | -0.02841818 | -1.17352086 | 0.245337441 | 0.416683929 |
| 211787_s_at | -0.08751147 | -1.19715592 | 0.23606906  | 0.405207912 |
| 211788_s_at | 0.04978239  | 1.523067862 | 0.133123466 | 0.269857755 |
| 211789_s_at | -0.00645423 | -0.20964336 | 0.834673602 | 0.908851447 |
| 211790_s_at | 0.008491782 | 0.259101605 | 0.796465394 | 0.884407458 |
| 211791_s_at | -0.52933154 | -7.80953091 | 1.20E-10    | 2.34E-08    |
| 211792_s_at | -0.00480259 | -0.0662819  | 0.947379138 | 0.972997931 |
| 211793_s_at | -0.28895323 | -5.09366958 | 3.93E-06    | 4.94E-05    |
| 211794_at   | 0.007770236 | 0.185302161 | 0.85363229  | 0.919821928 |
| 211795_s_at | 0.185238955 | 3.174482693 | 0.00239317  | 0.010592803 |
| 211796_s_at | 0.0394378   | 0.786832196 | 0.434552583 | 0.615231857 |
| 211797_s_at | -0.14130745 | -3.41772846 | 0.001154524 | 0.005742682 |
| 211798_x_at | -0.01236625 | -0.2557359  | 0.799050842 | 0.886221467 |
| 211799_x_at | 0.219121423 | 2.796775299 | 0.006972048 | 0.025961904 |
| 211800_s_at | 0.024485909 | 0.563245419 | 0.575417941 | 0.732853969 |
| 211801_x_at | 0.012856061 | 0.330225034 | 0.742408306 | 0.850740033 |
| 211802_x_at | -0.02088698 | -0.49056117 | 0.625569855 | 0.770562459 |
| 211803_at   | -0.00305844 | -0.09136745 | 0.92751242  | 0.962062457 |
| 211804_s_at | -0.02930023 | -0.66101976 | 0.511191674 | 0.681934759 |
| 211805_s_at | -0.21341858 | -6.00240598 | 1.31E-07    | 3.12E-06    |
| 211806_s_at | 0.040809246 | 0.946586964 | 0.347738603 | 0.530759543 |
| 211807_x_at | -0.00239593 | -0.06244276 | 0.950422866 | 0.974619156 |
| 211808_s_at | 0.002049251 | 0.041442712 | 0.967083925 | 0.983321536 |
| 211809_x_at | 0.044837942 | 1.374245223 | 0.174601913 | 0.328698766 |
| 211810_s_at | -0.04659235 | -0.94377556 | 0.349161567 | 0.53227577  |
| 211811_s_at | -0.04094441 | -1.09052817 | 0.279947029 | 0.457070567 |
| 211812_s_at | -0.44640831 | -5.30389279 | 1.81E-06    | 2.61E-05    |
| 211813_x_at | 0.094928408 | 1.100399274 | 0.275660593 | 0.452103604 |
| 211814_s_at | -0.10042846 | -1.64076985 | 0.106205542 | 0.227815603 |
| 211815_s_at | -0.1366216  | -3.24262357 | 0.001957103 | 0.008948017 |
| 211816_x_at | 0.069168285 | 2.032119831 | 0.046685172 | 0.120925797 |
| 211817_s_at | -0.07353872 | -1.49820035 | 0.139452096 | 0.279179048 |
| 211818_s_at | 0.053071488 | 1.017547761 | 0.313078135 | 0.494088352 |
| 211819_s_at | 0.003181855 | 0.058605647 | 0.953465723 | 0.976080838 |
| 211820_x_at | -0.02068441 | -0.51257121 | 0.610179117 | 0.759189353 |
| 211821_x_at | -0.02471421 | -0.52039998 | 0.604746639 | 0.754890282 |
| 211822_s_at | 0.029306263 | 1.014942907 | 0.314307748 | 0.49543406  |
| 211823_s_at | 0.070534908 | 1.499249771 | 0.139180306 | 0.27878479  |
| 211824_x_at | 0.031611969 | 0.839262209 | 0.404734949 | 0.587114621 |
| 211825_s_at | 0.062406143 | 1.333365398 | 0.187575057 | 0.345581023 |
| 211826_s_at | 0.036926721 | 1.275932519 | 0.207016583 | 0.370717039 |
| 211827_s_at | -0.06449189 | -1.61499878 | 0.111686112 | 0.236629963 |
| 211828_s_at | 0.079722098 | 0.897577034 | 0.373086185 | 0.556122061 |
| 211829_s_at | 0.022943489 | 0.772852755 | 0.442717532 | 0.622963129 |
| 211830_s_at | -0.04055609 | -1.10638124 | 0.27308544  | 0.449053547 |
| 211831_s_at | 0.008369103 | 0.186909214 | 0.852377793 | 0.919044663 |
| 211832_s_at | 0.001935177 | 0.068239534 | 0.945827404 | 0.972080449 |
| 211833_s_at | 0.120089406 | 3.677526289 | 0.000513424 | 0.002930143 |
| 211834_s_at | -0.03482944 | -0.91698601 | 0.362910709 | 0.546027653 |
| 211835_at   | 0.017428152 | 0.402269638 | 0.688950037 | 0.81466767  |
| 211836_s_at | -0.07944689 | -0.53526807 | 0.594491245 | 0.747601303 |
| 211837_s_at | -0.0294437  | -0.47778766 | 0.634579834 | 0.777238125 |
| 211838_x_at | -0.03619326 | -1.22659139 | 0.224884745 | 0.392140033 |
| 211839_s_at | -0.0157571  | -0.39198686 | 0.696490724 | 0.820376972 |
| 211840_s_at | -0.02068401 | -0.39059565 | 0.697513324 | 0.820998255 |
| 211841_s_at | -0.03798684 | -0.9251486  | 0.358685065 | 0.541730693 |
| 211842_s_at | 0.028967293 | 0.72777363  | 0.469651822 | 0.646353367 |
| 211843_x_at | -0.04211647 | -0.65576355 | 0.514544225 | 0.685033353 |
| 211844_s_at | 0.013955717 | 0.431793626 | 0.667476921 | 0.799734016 |
| 211845_at   | -0.0188343  | -0.39925994 | 0.691153906 | 0.816414706 |
| 211846_s_at | 0.050490781 | 1.045783986 | 0.299957912 | 0.479272068 |
| 211848_s_at | -0.02413827 | -0.46067072 | 0.646740921 | 0.785716292 |
| 211849_s_at | -0.01710015 | -0.53972673 | 0.591431808 | 0.745251769 |
| 211851_x_at | 0.08547082  | 2.287098566 | 0.025820781 | 0.075641212 |
| 211852_s_at | -0.00566436 | -0.13286435 | 0.894756121 | 0.943783829 |
| 211855_s_at | -0.38917906 | -6.6071689  | 1.28E-08    | 5.42E-07    |
| 211856_x_at | 0.095237545 | 2.465588393 | 0.016628874 | 0.052947966 |
| 211858_x_at | 0.108782052 | 1.782395333 | 0.079868334 | 0.183473431 |

|             |             |             |             |             |
|-------------|-------------|-------------|-------------|-------------|
| 211861_x_at | 0.026288865 | 0.831957246 | 0.408812558 | 0.590951581 |
| 211862_x_at | 0.205985453 | 3.310263153 | 0.001599072 | 0.007559235 |
| 211863_x_at | 0.019697011 | 0.500929817 | 0.618298046 | 0.765604862 |
| 211864_s_at | 0.162198959 | 2.152566399 | 0.03548444  | 0.097316555 |
| 211865_s_at | -0.07375055 | -2.02914469 | 0.046996727 | 0.121514477 |
| 211866_x_at | 0.019677767 | 0.44687672  | 0.656612286 | 0.792217383 |
| 211867_s_at | -0.02883237 | -0.59811915 | 0.55206652  | 0.714578224 |
| 211868_x_at | -0.02443675 | -0.57615998 | 0.566714705 | 0.726760792 |
| 211869_at   | -0.01016552 | -0.22222434 | 0.824912381 | 0.902783851 |
| 211870_s_at | 0.0663027   | 1.62525923  | 0.109477259 | 0.23309946  |
| 211871_x_at | -0.4516368  | -5.67299348 | 4.57E-07    | 8.42E-06    |
| 211872_s_at | -0.0655738  | -1.90285228 | 0.061979307 | 0.150886764 |
| 211873_s_at | 0.002695682 | 0.064874298 | 0.948495019 | 0.973591727 |
| 211874_s_at | 0.15425353  | 2.739454154 | 0.008142471 | 0.029511259 |
| 211875_x_at | 0.128958074 | 3.192561657 | 0.002269332 | 0.010136017 |
| 211876_x_at | -0.40159017 | -3.07784466 | 0.00316987  | 0.013447349 |
| 211877_s_at | -0.03490338 | -1.23002152 | 0.223607116 | 0.390750703 |
| 211878_at   | -0.02096819 | -0.6276801  | 0.532653336 | 0.699622139 |
| 211879_x_at | 0.011997602 | 0.356263962 | 0.722923136 | 0.838099194 |
| 211880_x_at | -0.02892192 | -0.70504365 | 0.483577709 | 0.658643067 |
| 211881_x_at | -0.0117796  | -0.2601134  | 0.795688603 | 0.884006141 |
| 211882_x_at | -0.00511316 | -0.12089242 | 0.904190058 | 0.949196197 |
| 211883_x_at | 0.008089048 | 0.141015316 | 0.888341759 | 0.940065113 |
| 211884_s_at | -0.11225807 | -2.74870978 | 0.007942018 | 0.028916199 |
| 211885_x_at | -0.05300513 | -1.15063339 | 0.254559472 | 0.427803515 |
| 211886_s_at | 0.018216484 | 0.37713713  | 0.70743484  | 0.827643747 |
| 211887_x_at | -0.01612915 | -0.52381259 | 0.602385568 | 0.753416053 |
| 211888_x_at | -0.0136407  | -0.27651821 | 0.783123599 | 0.876043041 |
| 211889_x_at | 0.003937635 | 0.108557348 | 0.913924669 | 0.954246988 |
| 211890_x_at | 0.036375642 | 0.224436542 | 0.823198814 | 0.901778449 |
| 211891_s_at | -0.4373248  | -5.53144989 | 7.77E-07    | 1.30E-05    |
| 211892_s_at | 0.006233804 | 0.218599889 | 0.827721711 | 0.904419762 |
| 211893_x_at | 0.005688412 | 0.118423159 | 0.906137619 | 0.950230364 |
| 211894_x_at | -0.04687929 | -1.04042521 | 0.302418576 | 0.482031849 |
| 211896_s_at | 0.232126387 | 1.944583795 | 0.056632455 | 0.140636435 |
| 211897_s_at | 0.011222864 | 0.314801145 | 0.754031474 | 0.858533951 |
| 211898_s_at | -0.24666212 | -4.22193745 | 8.55E-05    | 0.000645863 |
| 211899_s_at | 0.055208478 | 1.490653567 | 0.141419    | 0.282030252 |
| 211900_x_at | -0.00991547 | -0.16707154 | 0.867889283 | 0.928444781 |
| 211901_s_at | -0.08489161 | -1.53165683 | 0.130991366 | 0.266733468 |
| 211902_x_at | -0.4304428  | -7.76380475 | 1.44E-10    | 2.64E-08    |
| 211903_s_at | -0.020959   | -0.43702049 | 0.66370366  | 0.797050758 |
| 211904_x_at | -0.00967703 | -0.24353823 | 0.808439519 | 0.892334002 |
| 211905_s_at | 0.190558626 | 2.96830689  | 0.004332541 | 0.017529416 |
| 211906_s_at | -0.04762262 | -1.35931369 | 0.179258433 | 0.33500953  |
| 211907_s_at | -0.045207   | -1.48874998 | 0.141918566 | 0.282761559 |
| 211908_x_at | -0.04694448 | -1.05493493 | 0.295787686 | 0.474711603 |
| 211909_x_at | -0.06289458 | -1.02396396 | 0.310063263 | 0.490664519 |
| 211910_at   | -0.04404109 | -1.01214486 | 0.315632183 | 0.496908324 |
| 211911_x_at | 0.221761623 | 1.946769798 | 0.05636357  | 0.140131323 |
| 211912_at   | -0.06855458 | -1.23647805 | 0.221216697 | 0.388167123 |
| 211913_s_at | -0.10969564 | -1.84546085 | 0.070027578 | 0.165766554 |
| 211914_x_at | 0.082703384 | 2.654508724 | 0.010211056 | 0.035458627 |
| 211915_s_at | -0.01706983 | -0.3444063  | 0.73177439  | 0.843495741 |
| 211916_s_at | 0.065132844 | 1.392153363 | 0.16913995  | 0.321252078 |
| 211917_s_at | -0.04542935 | -1.26934986 | 0.209337419 | 0.373764849 |
| 211918_x_at | 0.072816265 | 1.900293072 | 0.062320712 | 0.151534511 |
| 211919_s_at | 0.226871659 | 2.731411245 | 0.008320421 | 0.030046132 |
| 211920_at   | -0.05554493 | -0.87350623 | 0.385954841 | 0.568638945 |
| 211921_x_at | 0.622429708 | 7.213311235 | 1.22E-09    | 1.08E-07    |
| 211922_s_at | 0.159928422 | 1.594346874 | 0.116241334 | 0.243762091 |
| 211923_s_at | 0.010251326 | 0.383442219 | 0.702780307 | 0.824512267 |
| 211924_s_at | -0.01232673 | -0.39034052 | 0.697700922 | 0.821045069 |
| 211925_s_at | -0.35961696 | -7.83961468 | 1.07E-10    | 2.18E-08    |
| 211926_s_at | -0.01282829 | -0.24608771 | 0.806474769 | 0.891049947 |
| 211927_x_at | -0.00600326 | -0.16675599 | 0.868136454 | 0.928533072 |
| 211928_at   | -0.08602438 | -1.58535998 | 0.118269802 | 0.2469729   |
| 211929_at   | 0.052223549 | 0.70424213  | 0.484072935 | 0.659053714 |
| 211930_at   | 0.221911547 | 3.622402876 | 0.000611337 | 0.003390654 |
| 211931_s_at | 0.230256941 | 2.841644068 | 0.006166269 | 0.02344726  |
| 211932_at   | -0.10268608 | -1.47186705 | 0.146410282 | 0.289069108 |
| 211933_s_at | -0.01576405 | -0.30601804 | 0.760676095 | 0.862255207 |
| 211934_x_at | 0.01264522  | 0.229536458 | 0.819251744 | 0.899275426 |
| 211935_at   | -0.01447521 | -0.24244217 | 0.80928458  | 0.892896202 |
| 211936_at   | -0.03385975 | -0.25484247 | 0.799737532 | 0.88669701  |

|             |             |             |             |             |
|-------------|-------------|-------------|-------------|-------------|
| 211937_at   | 0.027397684 | 0.567322818 | 0.572663155 | 0.730833275 |
| 211938_at   | -0.16565941 | -2.91635167 | 0.005012964 | 0.019758444 |
| 211939_x_at | -0.11520738 | -1.61253027 | 0.112222875 | 0.23742648  |
| 211940_x_at | 0.279670597 | 5.402785873 | 1.26E-06    | 1.92E-05    |
| 211941_s_at | -0.20881207 | -3.18631987 | 0.00231139  | 0.010293011 |
| 211942_x_at | 0.03775023  | 0.937147303 | 0.35253139  | 0.535713461 |
| 211943_x_at | -0.00786304 | -0.23227838 | 0.817131574 | 0.897918525 |
| 211944_at   | 0.211554174 | 2.693642994 | 0.009204725 | 0.032654198 |
| 211945_s_at | 0.444938467 | 6.492691653 | 2.00E-08    | 7.39E-07    |
| 211946_s_at | 0.206453961 | 3.750369316 | 0.000406821 | 0.002406766 |
| 211947_s_at | 0.019900092 | 0.497793962 | 0.620493307 | 0.767113959 |
| 211948_x_at | 0.143880359 | 2.346755693 | 0.022340268 | 0.067325102 |
| 211949_s_at | -0.11015753 | -2.56491529 | 0.012903479 | 0.042943055 |
| 211950_at   | 0.134011169 | 2.413317272 | 0.018956095 | 0.059024997 |
| 211951_at   | -0.02441777 | -0.51316334 | 0.609767454 | 0.758931911 |
| 211952_at   | -0.13897109 | -2.91877649 | 0.00497912  | 0.019654375 |
| 211953_s_at | 0.099542376 | 1.356446982 | 0.180163182 | 0.336362809 |
| 211954_s_at | 0.123340726 | 1.704154966 | 0.093652774 | 0.207120993 |
| 211955_at   | 0.088424992 | 1.954591905 | 0.055410338 | 0.138290873 |
| 211956_s_at | -0.03965207 | -0.58748324 | 0.559137505 | 0.720787256 |
| 211958_at   | 0.052972614 | 0.938777613 | 0.351700586 | 0.534939166 |
| 211959_at   | 0.366988008 | 3.344027549 | 0.001444409 | 0.006946466 |
| 211960_s_at | -0.00520138 | -0.05675505 | 0.954933512 | 0.976767183 |
| 211961_s_at | 0.099564342 | 1.779812277 | 0.080294828 | 0.184263745 |
| 211962_s_at | 0.773285294 | 5.352165449 | 1.52E-06    | 2.25E-05    |
| 211963_s_at | -0.05705728 | -0.80123347 | 0.42623526  | 0.607555854 |
| 211964_at   | 0.274085359 | 2.760627523 | 0.007690586 | 0.028138165 |
| 211965_at   | 0.618884018 | 4.661911795 | 1.86E-05    | 0.000179373 |
| 211966_at   | 0.122853831 | 1.672831896 | 0.09969461  | 0.217110978 |
| 211967_at   | 0.590877606 | 4.88239818  | 8.45E-06    | 9.28E-05    |
| 211968_s_at | -0.09986304 | -0.85933534 | 0.393659328 | 0.576371075 |
| 211969_at   | 0.057878112 | 0.772123041 | 0.443146192 | 0.623389663 |
| 211970_x_at | -0.07350602 | -1.23737989 | 0.220884306 | 0.387781805 |
| 211971_s_at | -0.2533913  | -3.05889465 | 0.003347513 | 0.014085965 |
| 211972_x_at | 0.133625525 | 2.159375804 | 0.034928125 | 0.096091582 |
| 211973_at   | -0.03228157 | -0.47111314 | 0.639310102 | 0.780663115 |
| 211974_x_at | 0.427069724 | 7.517240013 | 3.75E-10    | 4.86E-08    |
| 211975_at   | 0.088644177 | 1.669149111 | 0.100425478 | 0.218266568 |
| 211976_at   | -0.07190743 | -1.78581704 | 0.079306279 | 0.182360374 |
| 211977_at   | 0.127816998 | 3.17391804  | 0.002397138 | 0.010604066 |
| 211978_x_at | -0.26027868 | -4.76966016 | 1.27E-05    | 0.00012965  |
| 211979_at   | 0.100519605 | 2.285561978 | 0.025916459 | 0.075856859 |
| 211980_at   | 0.08933949  | 0.862419407 | 0.391974487 | 0.574759533 |
| 211981_at   | 0.032896106 | 0.434794063 | 0.66530985  | 0.79835753  |
| 211982_x_at | 0.052591643 | 1.450954826 | 0.152127801 | 0.297193499 |
| 211983_x_at | -0.09144471 | -1.35157805 | 0.181707811 | 0.338313843 |
| 211984_at   | -0.46234398 | -6.74485544 | 7.53E-09    | 3.66E-07    |
| 211985_s_at | -0.49922844 | -4.80582816 | 1.11E-05    | 0.000116564 |
| 211986_at   | 0.758844817 | 8.213290467 | 2.51E-11    | 9.85E-09    |
| 211987_at   | 0.15208937  | 1.943515893 | 0.056764208 | 0.140860965 |
| 211988_at   | 0.100507224 | 1.702178391 | 0.094024916 | 0.207771465 |
| 211989_at   | 0.065570217 | 1.500608517 | 0.138829025 | 0.278293196 |
| 211990_at   | 0.363117818 | 2.034889707 | 0.046396716 | 0.120359996 |
| 211991_s_at | 0.279167648 | 1.706853807 | 0.093146603 | 0.206299023 |
| 211992_at   | 0.507985997 | 6.867755519 | 4.68E-09    | 2.65E-07    |
| 211993_at   | 0.214119667 | 3.761322446 | 0.000392752 | 0.002335092 |
| 211994_at   | 0.270696076 | 5.250512592 | 2.21E-06    | 3.07E-05    |
| 211995_x_at | -0.1275224  | -1.46290952 | 0.148838336 | 0.292634857 |
| 211996_s_at | 0.290773636 | 4.647791657 | 1.95E-05    | 0.000187268 |
| 211997_x_at | 0.26009176  | 2.949419643 | 0.004569296 | 0.018328036 |
| 211998_at   | 0.487627473 | 5.148828466 | 3.21E-06    | 4.18E-05    |
| 211999_at   | 0.190390977 | 2.574512408 | 0.012586994 | 0.042096681 |
| 212000_at   | -0.05652063 | -1.07688313 | 0.285948422 | 0.463802239 |
| 212001_at   | -0.0077422  | -0.1564908  | 0.876184376 | 0.933553792 |
| 212002_at   | 0.069885949 | 1.869899671 | 0.066498701 | 0.159397154 |
| 212003_at   | 0.065236919 | 1.944649975 | 0.056624298 | 0.140636435 |
| 212004_at   | 0.066275858 | 2.018203589 | 0.048157954 | 0.123843448 |
| 212005_at   | 0.131473386 | 2.966282643 | 0.004357359 | 0.01760992  |
| 212006_at   | 0.085242725 | 1.390766916 | 0.169558064 | 0.321765063 |
| 212007_at   | 0.060480407 | 0.984669537 | 0.32883693  | 0.511302928 |
| 212008_at   | -0.22500981 | -2.32263308 | 0.023693858 | 0.070689313 |
| 212009_s_at | -0.05570922 | -0.73773654 | 0.46362028  | 0.641489708 |
| 212010_s_at | 0.187150508 | 2.817134343 | 0.006595102 | 0.024779176 |
| 212012_at   | 0.269082397 | 4.392967805 | 4.76E-05    | 0.000394872 |
| 212013_at   | 0.102322149 | 2.087987113 | 0.04115745  | 0.109393305 |



|             |             |             |             |             |
|-------------|-------------|-------------|-------------|-------------|
| 212014_x_at | 0.364197639 | 4.184965288 | 9.69E-05    | 0.000717344 |
| 212015_x_at | 0.294673755 | 5.124948506 | 3.50E-06    | 4.50E-05    |
| 212016_s_at | 0.019795571 | 0.381791842 | 0.70399755  | 0.825498728 |
| 212017_at   | -0.25404474 | -4.08004371 | 0.000137994 | 0.000967108 |
| 212018_s_at | -0.13021068 | -3.16893836 | 0.002432401 | 0.010738798 |
| 212019_at   | -0.0617526  | -0.80628407 | 0.423341035 | 0.604989425 |
| 212020_s_at | -0.0659117  | -1.45496134 | 0.151019098 | 0.295762871 |
| 212021_s_at | 0.005154747 | 0.123811144 | 0.901888755 | 0.947912753 |
| 212022_s_at | 0.057158826 | 2.06530247  | 0.043329419 | 0.114007653 |
| 212023_s_at | -0.06736869 | -1.51656215 | 0.134756691 | 0.272303931 |
| 212024_x_at | 0.098855446 | 3.255481858 | 0.001883699 | 0.008675421 |
| 212025_s_at | 0.108470213 | 3.092316977 | 0.003040179 | 0.012990888 |
| 212026_s_at | -0.00509321 | -0.12741002 | 0.899052346 | 0.946001023 |
| 212027_at   | 0.136955463 | 2.761536892 | 0.007671705 | 0.028073678 |
| 212028_at   | -0.06618639 | -1.77701696 | 0.080758504 | 0.185052249 |
| 212029_s_at | -0.03638296 | -0.63291118 | 0.529255254 | 0.696776617 |
| 212030_at   | -0.03643491 | -0.4594704  | 0.647597407 | 0.78620436  |
| 212031_at   | 0.026450309 | 0.309028276 | 0.758396714 | 0.861091051 |
| 212032_s_at | 0.049861907 | 1.019527894 | 0.312145596 | 0.493104202 |
| 212033_at   | 0.001237441 | 0.019618393 | 0.984414477 | 0.992453233 |
| 212034_s_at | -0.09003179 | -2.03494808 | 0.046390653 | 0.120355492 |
| 212035_s_at | -0.12812202 | -2.69634003 | 0.009138832 | 0.032456506 |
| 212036_s_at | 0.285765828 | 3.486920582 | 0.000933298 | 0.00481206  |
| 212037_at   | 0.157328837 | 2.494703674 | 0.015447253 | 0.049846536 |
| 212038_s_at | -0.52668194 | -4.82934932 | 1.02E-05    | 0.00010872  |
| 212039_x_at | 0.006314086 | 0.17189336  | 0.864113956 | 0.926314574 |
| 212040_at   | 0.206795623 | 2.267586604 | 0.0270593   | 0.078400922 |
| 212041_at   | -0.27663217 | -3.54750223 | 0.000773249 | 0.004119447 |
| 212042_x_at | -0.01073924 | -0.16859071 | 0.866699488 | 0.927869789 |
| 212043_at   | 0.123481141 | 2.139474835 | 0.036575811 | 0.099673547 |
| 212044_s_at | 0.089884922 | 2.544935898 | 0.013585614 | 0.044783588 |
| 212045_at   | 0.081020946 | 2.845468256 | 0.00610173  | 0.023228151 |
| 212046_x_at | -0.10098146 | -3.26587277 | 0.001826283 | 0.008454848 |
| 212047_s_at | -0.04285754 | -0.9891147  | 0.326676001 | 0.508881276 |
| 212048_s_at | -0.51303957 | -6.0695111  | 1.01E-07    | 2.55E-06    |
| 212049_at   | 0.073730423 | 2.180055477 | 0.033285194 | 0.092499807 |
| 212050_at   | 0.100833535 | 2.229505608 | 0.029628804 | 0.084266927 |
| 212051_at   | 0.048446372 | 1.145816313 | 0.25653153  | 0.43010606  |
| 212052_s_at | 0.09404724  | 2.94806233  | 0.004586765 | 0.01837337  |
| 212053_at   | -0.10906489 | -3.03785143 | 0.003555651 | 0.014830534 |
| 212054_x_at | 0.089881194 | 2.81650952  | 0.006606385 | 0.024813914 |
| 212055_at   | 0.13323645  | 1.668862987 | 0.100482443 | 0.218379759 |
| 212056_at   | 0.088448276 | 1.975406159 | 0.052940708 | 0.133349835 |
| 212057_at   | 0.111892016 | 2.181552014 | 0.033168975 | 0.092308849 |
| 212058_at   | 0.274746864 | 3.171786652 | 0.002412172 | 0.010662128 |
| 212059_s_at | 0.071008287 | 2.184450738 | 0.032944875 | 0.091793788 |
| 212060_at   | -0.03527943 | -0.84373283 | 0.402251814 | 0.584499076 |
| 212061_at   | -0.00558719 | -0.10701131 | 0.915145739 | 0.954807244 |
| 212062_at   | -0.29209817 | -3.67783867 | 0.000512915 | 0.002928357 |
| 212063_at   | 1.324094404 | 5.047236141 | 4.65E-06    | 5.69E-05    |
| 212064_x_at | -0.04198969 | -1.05293032 | 0.296697795 | 0.475763979 |
| 212065_s_at | -0.05840622 | -1.10276316 | 0.274640951 | 0.45092922  |
| 212066_s_at | 0.163895042 | 3.335502752 | 0.001482066 | 0.007095578 |
| 212067_s_at | 0.471813427 | 4.697392084 | 1.64E-05    | 0.000161414 |
| 212068_s_at | -0.08933866 | -2.19520639 | 0.032124937 | 0.090000062 |
| 212069_s_at | -0.10818556 | -2.41919743 | 0.018680447 | 0.058280387 |
| 212070_at   | 0.375038443 | 3.372214776 | 0.001326233 | 0.006461574 |
| 212071_s_at | 0.112483408 | 2.877206987 | 0.005589686 | 0.021600885 |
| 212072_s_at | -0.13169452 | -3.68707342 | 0.000498066 | 0.002855257 |
| 212073_at   | -0.04986818 | -1.79906949 | 0.077160455 | 0.178507414 |
| 212074_at   | 0.1322462   | 1.462453256 | 0.148962852 | 0.292815261 |
| 212075_s_at | 0.001759183 | 0.046707789 | 0.96290503  | 0.981101794 |
| 212076_at   | 0.180559477 | 3.569829489 | 0.000721141 | 0.00389007  |
| 212077_at   | 0.681340839 | 7.056701714 | 2.25E-09    | 1.59E-07    |
| 212078_s_at | 0.130147112 | 2.589793953 | 0.012097578 | 0.040758762 |
| 212079_s_at | 0.260012638 | 2.729031552 | 0.008373752 | 0.030192796 |
| 212080_at   | 0.151032654 | 2.819668832 | 0.006549515 | 0.024630673 |
| 212081_x_at | -0.04345207 | -1.12026788 | 0.267172643 | 0.442485817 |
| 212082_s_at | 0.372288749 | 5.022800151 | 5.08E-06    | 6.10E-05    |
| 212083_at   | 0.23139899  | 6.071292141 | 1.01E-07    | 2.53E-06    |
| 212084_at   | 0.024862657 | 0.741832217 | 0.461153654 | 0.639422906 |
| 212085_at   | -0.48014075 | -5.35130976 | 1.52E-06    | 2.25E-05    |
| 212086_x_at | 0.092625432 | 1.837899423 | 0.07115086  | 0.167714885 |
| 212087_s_at | -0.06681026 | -2.3535201  | 0.021973287 | 0.066501667 |
| 212088_at   | 0.041800067 | 1.321425608 | 0.191498634 | 0.350742059 |

|             |             |             |             |             |
|-------------|-------------|-------------|-------------|-------------|
| 212089_at   | 0.147907017 | 3.240783409 | 0.001967826 | 0.008985092 |
| 212090_at   | -0.18504427 | -3.71322767 | 0.000458211 | 0.002661792 |
| 212091_s_at | 0.164543956 | 2.53940358  | 0.01378019  | 0.045317458 |
| 212092_at   | -1.20515088 | -5.94813317 | 1.61E-07    | 3.64E-06    |
| 212093_s_at | 0.027662522 | 0.296123423 | 0.768183332 | 0.867267455 |
| 212094_at   | -0.82966309 | -5.34601758 | 1.55E-06    | 2.29E-05    |
| 212095_s_at | 0.131642544 | 1.56679809  | 0.122549606 | 0.253622921 |
| 212096_s_at | 0.369997396 | 3.902922972 | 0.00024804  | 0.001583629 |
| 212097_at   | 0.489648115 | 4.75227003  | 1.35E-05    | 0.000136667 |
| 212098_at   | 0.161801939 | 3.404399135 | 0.001202497 | 0.005946717 |
| 212099_at   | 0.139014973 | 1.805969146 | 0.076062617 | 0.176481698 |
| 212100_s_at | 0.209290757 | 4.713560233 | 1.55E-05    | 0.00015393  |
| 212101_at   | -0.03048844 | -0.88031638 | 0.382286105 | 0.565017227 |
| 212102_s_at | -0.0751465  | -2.55812856 | 0.013131625 | 0.043562842 |
| 212103_at   | -0.06979959 | -1.33369344 | 0.187468125 | 0.345440977 |
| 212104_s_at | -0.3403287  | -4.26384992 | 7.41E-05    | 0.00057363  |
| 212105_s_at | -0.03520046 | -1.25625391 | 0.214012018 | 0.379548616 |
| 212106_at   | 0.137842001 | 3.059166466 | 0.0033449   | 0.014078948 |
| 212107_s_at | -0.01634746 | -0.22996342 | 0.818921513 | 0.899086418 |
| 212108_at   | 0.107759135 | 2.894374419 | 0.005329583 | 0.020775378 |
| 212109_at   | 0.108747977 | 3.078127522 | 0.003167286 | 0.01343894  |
| 212110_at   | 0.274847057 | 1.246229927 | 0.217641935 | 0.383959791 |
| 212111_at   | -0.00463513 | -0.09259105 | 0.926544459 | 0.961527074 |
| 212112_s_at | -0.03728212 | -0.63597786 | 0.527268428 | 0.695246373 |
| 212113_at   | -0.07781841 | -1.71671826 | 0.09131564  | 0.20319037  |
| 212114_at   | -0.03186338 | -0.97154478 | 0.335272605 | 0.518065321 |
| 212115_at   | 0.215526598 | 2.93081456  | 0.004814216 | 0.019123361 |
| 212116_at   | 0.051571268 | 1.259430051 | 0.212871261 | 0.378144551 |
| 212117_at   | 0.023498771 | 0.373318831 | 0.710259055 | 0.829735573 |
| 212118_at   | 0.067614976 | 2.236803621 | 0.029120311 | 0.083154107 |
| 212119_at   | 0.139277357 | 2.274920186 | 0.026587762 | 0.077360694 |
| 212120_at   | 0.010468311 | 0.167144044 | 0.867832491 | 0.928444781 |
| 212121_at   | -0.05803771 | -1.17373053 | 0.245254083 | 0.416621517 |
| 212122_at   | 0.178855537 | 2.851587322 | 0.005999758 | 0.022904345 |
| 212123_at   | -0.01624911 | -0.46726345 | 0.642045274 | 0.782495459 |
| 212124_at   | 0.334916272 | 5.16732019  | 3.00E-06    | 3.95E-05    |
| 212125_at   | -0.24691451 | -3.13161767 | 0.002712599 | 0.011805576 |
| 212126_at   | -0.02173592 | -0.55556928 | 0.580621481 | 0.737042871 |
| 212127_at   | -0.07327121 | -1.42231217 | 0.160239979 | 0.308656372 |
| 212128_s_at | 0.033727014 | 0.817210256 | 0.417120353 | 0.599457933 |
| 212129_at   | -0.05390412 | -1.30779696 | 0.196052524 | 0.356714546 |
| 212130_x_at | -0.02133865 | -0.45786459 | 0.64874398  | 0.786887747 |
| 212131_at   | 0.444280956 | 4.418785863 | 4.35E-05    | 0.000366493 |
| 212132_at   | 0.305974968 | 4.545393669 | 2.80E-05    | 0.000253033 |
| 212133_at   | 0.009988595 | 0.343187172 | 0.732686524 | 0.844028391 |
| 212134_at   | 0.29614611  | 5.234660466 | 2.34E-06    | 3.22E-05    |
| 212135_s_at | 0.314496654 | 5.517529795 | 8.19E-07    | 1.36E-05    |
| 212136_at   | 0.557249628 | 6.299931946 | 4.20E-08    | 1.29E-06    |
| 212137_at   | 0.072070237 | 1.225628848 | 0.225244224 | 0.39252183  |
| 212138_at   | 0.182126624 | 2.590922625 | 0.012062126 | 0.040660774 |
| 212139_at   | 0.208463236 | 5.449451948 | 1.06E-06    | 1.67E-05    |
| 212140_at   | 0.067939439 | 1.338420768 | 0.185932255 | 0.34368724  |
| 212141_at   | -0.17884469 | -4.11449271 | 0.000122947 | 0.000878595 |
| 212142_at   | -0.14233592 | -2.85670944 | 0.005915613 | 0.022631447 |
| 212143_s_at | 0.066678827 | 1.210326627 | 0.231015767 | 0.399186386 |
| 212144_at   | 0.341768055 | 5.76610962  | 3.21E-07    | 6.33E-06    |
| 212145_at   | -0.11487013 | -2.83528889 | 0.006274918 | 0.023776061 |
| 212146_at   | -0.1326835  | -2.90222379 | 0.005214432 | 0.02038801  |
| 212147_at   | 0.065848218 | 1.062111898 | 0.292545013 | 0.471082429 |
| 212148_at   | -0.06438316 | -0.9784805  | 0.331861399 | 0.514341436 |
| 212149_at   | 0.266350941 | 3.697763492 | 0.000481391 | 0.002773539 |
| 212150_at   | 0.006667385 | 0.081875247 | 0.935025094 | 0.966177464 |
| 212151_at   | -0.0450115  | -0.81344791 | 0.419256131 | 0.601549316 |
| 212152_x_at | 0.185979089 | 5.576830997 | 6.56E-07    | 1.12E-05    |
| 212153_at   | 0.211347903 | 5.36439616  | 1.45E-06    | 2.17E-05    |
| 212154_at   | -0.16812485 | -1.90695734 | 0.061434998 | 0.149811778 |
| 212155_at   | -0.23969025 | -4.93511403 | 6.98E-06    | 7.96E-05    |
| 212156_at   | 0.01196115  | 0.379052968 | 0.706019336 | 0.826762391 |
| 212157_at   | -0.15822517 | -3.08545997 | 0.003100996 | 0.013211601 |
| 212158_at   | 0.126813265 | 1.39233629  | 0.169084843 | 0.321194364 |
| 212159_x_at | -0.18220148 | -3.00746731 | 0.003877561 | 0.015983761 |
| 212160_at   | 0.17658084  | 2.111064717 | 0.039045554 | 0.104799945 |
| 212161_at   | -0.06840339 | -1.49758146 | 0.139612579 | 0.279450259 |
| 212162_at   | -0.01501989 | -0.32027143 | 0.749902464 | 0.855882346 |
| 212163_at   | 0.02569038  | 0.369051727 | 0.713420066 | 0.831740309 |

|             |             |             |             |             |
|-------------|-------------|-------------|-------------|-------------|
| 212164_at   | -0.27660821 | -4.15305397 | 0.000107983 | 0.000786119 |
| 212165_at   | -0.32967729 | -5.23520342 | 2.34E-06    | 3.21E-05    |
| 212166_at   | -0.19901806 | -4.22456911 | 8.48E-05    | 0.000640871 |
| 212167_s_at | 0.034424045 | 0.961842441 | 0.340083256 | 0.52293139  |
| 212168_at   | 0.218633694 | 2.050510011 | 0.044798659 | 0.117084308 |
| 212169_at   | 0.125798605 | 3.287727754 | 0.001710861 | 0.008001443 |
| 212170_at   | -0.06907641 | -1.19233546 | 0.237938463 | 0.407384047 |
| 212171_x_at | -0.12719533 | -2.03515884 | 0.04636877  | 0.120308452 |
| 212172_at   | 0.083354617 | 1.966908757 | 0.053937302 | 0.135379417 |
| 212173_at   | 0.006378639 | 0.163958125 | 0.870328633 | 0.930039389 |
| 212174_at   | 0.390710987 | 6.956421871 | 3.32E-09    | 2.07E-07    |
| 212175_s_at | 0.084862828 | 1.892505711 | 0.063369394 | 0.153476667 |
| 212176_at   | 0.368882716 | 4.35241399  | 5.47E-05    | 0.000444675 |
| 212177_at   | 0.514740572 | 4.510808784 | 3.16E-05    | 0.000279656 |
| 212178_s_at | -0.15168448 | -2.89386837 | 0.005337087 | 0.020793748 |
| 212179_at   | -0.058922   | -1.24130001 | 0.219443743 | 0.386309562 |
| 212180_at   | 0.222914957 | 3.307965504 | 0.001610146 | 0.007603617 |
| 212181_s_at | 0.173725775 | 2.561404503 | 0.013021047 | 0.043250585 |
| 212182_at   | -0.16363371 | -4.35403584 | 5.44E-05    | 0.00044236  |
| 212183_at   | 0.144043483 | 2.615243199 | 0.011320788 | 0.03856904  |
| 212184_s_at | 0.216511573 | 3.255433066 | 0.001883973 | 0.008675786 |
| 212185_x_at | 0.620661169 | 4.72415156  | 1.49E-05    | 0.000148869 |
| 212186_at   | -0.07694291 | -1.97268101 | 0.053258587 | 0.13399948  |
| 212187_x_at | 0.20946543  | 3.476048295 | 0.000965167 | 0.004952384 |
| 212188_at   | 0.244836062 | 3.045442867 | 0.00347921  | 0.014578366 |
| 212189_s_at | 0.209607046 | 4.924362265 | 7.26E-06    | 8.22E-05    |
| 212190_at   | 0.25816203  | 3.537635728 | 0.0007974   | 0.004219713 |
| 212191_x_at | 0.063259453 | 1.147912551 | 0.25567202  | 0.429051289 |
| 212192_at   | 0.09240206  | 0.70678627  | 0.48250199  | 0.657559492 |
| 212193_s_at | -0.04790865 | -1.38709493 | 0.170669274 | 0.323324623 |
| 212194_s_at | -0.18742435 | -2.29560145 | 0.025296976 | 0.074394448 |
| 212195_at   | 0.385073121 | 4.305470446 | 6.43E-05    | 0.000507721 |
| 212196_at   | 0.011697402 | 0.150770745 | 0.880674662 | 0.936096466 |
| 212197_x_at | -0.03810206 | -1.06325733 | 0.292029763 | 0.470512744 |
| 212198_s_at | -0.13390261 | -3.80625041 | 0.000339772 | 0.002064874 |
| 212199_at   | -0.13218998 | -1.66880798 | 0.100493397 | 0.218392944 |
| 212200_at   | -0.016303   | -0.295716   | 0.768492934 | 0.867402967 |
| 212201_at   | -0.11759101 | -2.48263781 | 0.015927425 | 0.051126703 |
| 212202_s_at | 0.305675142 | 4.217176592 | 8.69E-05    | 0.000654623 |
| 212203_x_at | 0.557459321 | 3.960314946 | 0.000205398 | 0.001345992 |
| 212204_at   | 0.259440818 | 3.316337107 | 0.001570142 | 0.007444601 |
| 212205_at   | 0.098310858 | 1.682098577 | 0.097874827 | 0.214003021 |
| 212206_s_at | -0.08703028 | -2.03521937 | 0.046362487 | 0.120306119 |
| 212207_at   | 0.09976288  | 2.530937825 | 0.014082827 | 0.046102381 |
| 212208_at   | 0.322928573 | 5.716993053 | 3.87E-07    | 7.36E-06    |
| 212209_at   | 0.316158689 | 5.017006923 | 5.19E-06    | 6.20E-05    |
| 212210_at   | 0.028783419 | 0.783809455 | 0.436310473 | 0.616821802 |
| 212211_at   | -0.20550755 | -3.86524478 | 0.000280536 | 0.001759184 |
| 212212_s_at | 0.118998226 | 3.560578817 | 0.000742311 | 0.003986466 |
| 212213_x_at | -0.58580053 | -6.13086748 | 8.03E-08    | 2.12E-06    |
| 212214_at   | -0.59727236 | -6.76601148 | 6.94E-09    | 3.46E-07    |
| 212215_at   | -0.56058853 | -5.50661162 | 8.53E-07    | 1.40E-05    |
| 212216_at   | -0.76507037 | -5.11999341 | 3.56E-06    | 4.57E-05    |
| 212217_at   | -0.85060934 | -5.48673138 | 9.18E-07    | 1.49E-05    |
| 212218_s_at | -0.34860305 | -4.32822082 | 5.95E-05    | 0.000475739 |
| 212219_at   | 0.092947064 | 1.259424035 | 0.212873417 | 0.378144551 |
| 212220_at   | 0.066465624 | 2.105765725 | 0.039521947 | 0.105859379 |
| 212221_x_at | -0.43103    | -5.93705383 | 1.68E-07    | 3.78E-06    |
| 212222_at   | -0.07360654 | -1.23978564 | 0.219999421 | 0.386912251 |
| 212223_at   | -0.71682962 | -6.33864445 | 3.62E-08    | 1.15E-06    |
| 212224_at   | 0.438311848 | 2.975422072 | 0.004246348 | 0.017235289 |
| 212225_at   | -0.0184243  | -0.44912354 | 0.655000141 | 0.790974415 |
| 212226_s_at | 0.540029701 | 6.199073889 | 6.18E-08    | 1.74E-06    |
| 212227_x_at | -0.03422623 | -0.66513987 | 0.508571967 | 0.679677592 |
| 212228_s_at | 0.06800451  | 1.698260576 | 0.094766143 | 0.208933376 |
| 212229_s_at | 0.028155495 | 0.59486749  | 0.554223506 | 0.716587379 |
| 212230_at   | 0.301918998 | 3.005552014 | 0.003898736 | 0.016053281 |
| 212231_at   | -0.04822195 | -0.87112588 | 0.387242361 | 0.569897115 |
| 212232_at   | 0.091817438 | 1.508894347 | 0.136702004 | 0.275097959 |
| 212233_at   | -0.04547736 | -0.9111461  | 0.365953471 | 0.549265713 |
| 212234_at   | 0.283378025 | 6.618236713 | 1.23E-08    | 5.23E-07    |
| 212235_at   | 0.336637198 | 4.795137252 | 1.16E-05    | 0.000120321 |
| 212236_x_at | 0.010101963 | 0.20696014  | 0.836758873 | 0.909977311 |
| 212237_at   | 0.084623181 | 2.125284611 | 0.037791794 | 0.102267044 |
| 212238_at   | 0.074241799 | 2.038755871 | 0.045996665 | 0.119585978 |

|             |             |             |             |             |
|-------------|-------------|-------------|-------------|-------------|
| 212239_at   | 0.472865411 | 6.820814656 | 5.61E-09    | 2.98E-07    |
| 212240_s_at | 0.13259208  | 1.990226402 | 0.05124031  | 0.129931935 |
| 212241_at   | -0.05890785 | -1.34330531 | 0.18435535  | 0.341620752 |
| 212242_at   | -0.35416369 | -3.54013142 | 0.000791224 | 0.004192721 |
| 212243_at   | -0.02622578 | -0.79191988 | 0.431603308 | 0.612433803 |
| 212244_at   | 0.374760276 | 7.209112069 | 1.24E-09    | 1.08E-07    |
| 212245_at   | -0.02613918 | -0.31886648 | 0.750962233 | 0.856785564 |
| 212246_at   | -0.09082675 | -1.81939117 | 0.073964399 | 0.172815607 |
| 212247_at   | 0.135025452 | 2.475508204 | 0.01621744  | 0.051896738 |
| 212248_at   | -0.08904214 | -1.49112211 | 0.141296253 | 0.281848343 |
| 212249_at   | 0.374760276 | 4.258968907 | 7.54E-05    | 0.000581852 |
| 212250_at   | 0.211548395 | 1.722236536 | 0.090304391 | 0.201433638 |
| 212251_at   | 0.220298478 | 3.244109989 | 0.001948482 | 0.008914984 |
| 212252_at   | -0.80307287 | -8.31316193 | 1.71E-11    | 7.41E-09    |
| 212253_x_at | 0.049881075 | 0.849300618 | 0.399172409 | 0.581480225 |
| 212254_s_at | 0.195944509 | 3.285099583 | 0.001724368 | 0.008052815 |
| 212255_s_at | 0.201250847 | 3.540880992 | 0.000789378 | 0.004184458 |
| 212256_at   | 0.405594397 | 7.178025904 | 1.40E-09    | 1.16E-07    |
| 212257_s_at | -0.22753357 | -2.90844119 | 0.005124863 | 0.020110665 |
| 212258_s_at | 0.009517846 | 0.28722701  | 0.77495233  | 0.871065937 |
| 212259_s_at | 0.528956238 | 5.194348541 | 2.71E-06    | 3.64E-05    |
| 212260_at   | 0.048552425 | 1.197344265 | 0.235996234 | 0.405114026 |
| 212261_at   | 0.129584938 | 4.465902703 | 3.70E-05    | 0.000320285 |
| 212262_at   | 0.429982413 | 4.996901853 | 5.58E-06    | 6.59E-05    |
| 212263_at   | 0.60967359  | 5.455416695 | 1.03E-06    | 1.64E-05    |
| 212264_s_at | 0.174707987 | 2.607299624 | 0.011558233 | 0.039265366 |
| 212265_at   | 0.361795126 | 4.049497219 | 0.000152814 | 0.001049569 |
| 212266_s_at | 0.20532283  | 2.300191885 | 0.025018129 | 0.073763703 |
| 212267_at   | 0.27712196  | 3.728854415 | 0.000435875 | 0.002549754 |
| 212268_at   | 0.280934057 | 3.042064112 | 0.003513041 | 0.014676079 |
| 212269_s_at | 0.061726356 | 1.219885384 | 0.227397983 | 0.394889286 |
| 212270_x_at | -0.02631471 | -0.58903612 | 0.558102311 | 0.719888839 |
| 212271_at   | -0.85934602 | -6.55363893 | 1.58E-08    | 6.25E-07    |
| 212272_at   | -0.09604446 | -2.00178169 | 0.049947256 | 0.127338434 |
| 212273_x_at | 0.09588103  | 1.688388219 | 0.096655249 | 0.212104311 |
| 212274_at   | 0.117057329 | 2.320076193 | 0.023841527 | 0.071032582 |
| 212275_s_at | -0.0357738  | -0.67381461 | 0.503079951 | 0.675225214 |
| 212276_at   | 0.029660316 | 0.449469727 | 0.654751892 | 0.790805382 |
| 212277_at   | -0.0583657  | -0.91756438 | 0.362610244 | 0.545747406 |
| 212278_x_at | -0.0084482  | -0.18397217 | 0.854670795 | 0.920541456 |
| 212279_at   | -0.13941499 | -2.7930269  | 0.007043576 | 0.026186799 |
| 212280_x_at | 0.116922283 | 2.211434198 | 0.030921786 | 0.087189683 |
| 212281_s_at | -0.10518136 | -1.64910527 | 0.104480435 | 0.225130881 |
| 212282_at   | -0.13853697 | -2.78682035 | 0.0071635   | 0.026546528 |
| 212283_at   | -0.03067686 | -0.59996562 | 0.550843544 | 0.71365366  |
| 212284_x_at | -0.00430281 | -0.1528581  | 0.879035606 | 0.935104423 |
| 212285_s_at | 0.016165194 | 0.260437914 | 0.795439509 | 0.883844627 |
| 212286_at   | -0.06348753 | -0.90341144 | 0.370008511 | 0.553205552 |
| 212287_at   | 0.13727274  | 2.412386209 | 0.019000073 | 0.059133098 |
| 212288_at   | 0.300078017 | 4.231490797 | 8.28E-05    | 0.000628518 |
| 212289_at   | -0.02119246 | -0.49707996 | 0.620993634 | 0.767274584 |
| 212290_at   | 0.196346106 | 3.627092466 | 0.000602359 | 0.003347918 |
| 212291_at   | 0.385501604 | 5.109236035 | 3.71E-06    | 4.72E-05    |
| 212292_at   | 0.031864918 | 0.65418635  | 0.515552487 | 0.685766593 |
| 212293_at   | 0.275453969 | 3.232169166 | 0.002018761 | 0.009180145 |
| 212294_at   | 0.575217342 | 6.039583766 | 1.14E-07    | 2.79E-06    |
| 212295_s_at | 0.310150442 | 5.29112477  | 1.90E-06    | 2.71E-05    |
| 212296_at   | -0.29998009 | -3.51693381 | 0.000850429 | 0.004451034 |
| 212297_at   | -0.05101171 | -1.3702723  | 0.175831762 | 0.330429446 |
| 212298_at   | -0.0115259  | -0.26666198 | 0.790666097 | 0.880725019 |
| 212299_at   | 0.200234889 | 4.40028231  | 4.64E-05    | 0.000386661 |
| 212300_at   | 0.242770493 | 4.126125555 | 0.000118233 | 0.000849667 |
| 212301_at   | -0.25853907 | -3.03091664 | 0.003626848 | 0.015078663 |
| 212302_at   | -0.14770041 | -3.49105258 | 0.00092145  | 0.004760309 |
| 212303_x_at | 0.057915649 | 1.287760609 | 0.202894597 | 0.365591475 |
| 212305_s_at | -0.23800589 | -4.74887311 | 1.36E-05    | 0.00013805  |
| 212306_at   | -0.11475666 | -1.18761515 | 0.239779395 | 0.409666442 |
| 212307_s_at | -0.09933767 | -1.22817227 | 0.224295246 | 0.391411758 |
| 212308_at   | -0.53198216 | -4.64486949 | 1.97E-05    | 0.000188889 |
| 212309_at   | -0.02486122 | -0.43301249 | 0.666596248 | 0.799275582 |
| 212310_at   | -0.61067793 | -7.4007857  | 5.90E-10    | 6.53E-08    |
| 212311_at   | -0.01334683 | -0.24521796 | 0.807144898 | 0.891437745 |
| 212312_at   | 0.244045587 | 4.351387646 | 5.49E-05    | 0.000445844 |
| 212313_at   | 0.018828222 | 0.488782467 | 0.626821097 | 0.771562423 |
| 212314_at   | 0.106670221 | 1.273105234 | 0.208011037 | 0.372035748 |

|             |             |             |             |             |
|-------------|-------------|-------------|-------------|-------------|
| 212315_s_at | 0.025975133 | 0.539716301 | 0.591438954 | 0.745251769 |
| 212316_at   | 0.055141608 | 1.412181196 | 0.163188269 | 0.312811928 |
| 212317_at   | 0.096794314 | 2.766712335 | 0.007565054 | 0.027758408 |
| 212318_at   | 0.129525623 | 2.762173774 | 0.007658506 | 0.028034562 |
| 212319_at   | -0.29290306 | -5.25640536 | 2.16E-06    | 3.01E-05    |
| 212320_at   | 0.027941784 | 0.570227734 | 0.570704453 | 0.729195477 |
| 212321_at   | 0.404945076 | 8.583482517 | 6.02E-12    | 4.50E-09    |
| 212322_at   | 0.289346794 | 5.684214759 | 4.38E-07    | 8.16E-06    |
| 212323_s_at | 0.176231523 | 4.425659918 | 4.25E-05    | 0.000360035 |
| 212324_s_at | 0.007278397 | 0.243855639 | 0.808194842 | 0.89224455  |
| 212325_at   | 0.063603706 | 0.587217816 | 0.559314542 | 0.72095309  |
| 212326_at   | -0.00657375 | -0.11640714 | 0.907728132 | 0.951121508 |
| 212327_at   | 0.176971869 | 2.317833632 | 0.023971716 | 0.071318328 |
| 212328_at   | 0.316467893 | 3.429855916 | 0.001112458 | 0.005566275 |
| 212329_at   | -0.02782439 | -0.67358974 | 0.503221912 | 0.675354904 |
| 212330_at   | -0.16920289 | -3.26586106 | 0.001826347 | 0.008454848 |
| 212331_at   | 0.08064093  | 1.848578254 | 0.069568841 | 0.164977748 |
| 212332_at   | 0.306330815 | 5.417988524 | 1.19E-06    | 1.83E-05    |
| 212333_at   | 0.153557147 | 2.683103281 | 0.009466422 | 0.033381201 |
| 212334_at   | 0.411123882 | 6.27017367  | 4.70E-08    | 1.40E-06    |
| 212335_at   | -0.09437612 | -1.14739654 | 0.255883406 | 0.429293186 |
| 212336_at   | -0.19213706 | -2.97693851 | 0.004228185 | 0.017177169 |
| 212337_at   | 0.035083963 | 1.018316467 | 0.312715892 | 0.493725885 |
| 212338_at   | 0.026666957 | 0.248967418 | 0.804257032 | 0.889721411 |
| 212339_at   | -0.6132553  | -6.63150922 | 1.17E-08    | 5.03E-07    |
| 212340_at   | -0.00860688 | -0.22716892 | 0.82108352  | 0.900555118 |
| 212341_at   | 0.174523158 | 3.969094572 | 0.000199533 | 0.001314491 |
| 212342_at   | 0.001706654 | 0.068724998 | 0.945442628 | 0.971908497 |
| 212343_at   | 0.148095491 | 2.865956442 | 0.005766462 | 0.022165194 |
| 212344_at   | 0.148347846 | 2.941607225 | 0.004670695 | 0.018646067 |
| 212345_s_at | 0.418000086 | 5.921275218 | 1.78E-07    | 3.95E-06    |
| 212346_s_at | 0.217167506 | 5.196695598 | 2.69E-06    | 3.61E-05    |
| 212347_x_at | 0.175461418 | 3.382583102 | 0.001285112 | 0.006292094 |
| 212348_s_at | -0.06298826 | -2.1003863  | 0.040010741 | 0.106870669 |
| 212349_at   | 0.002081695 | 0.056141653 | 0.955420057 | 0.977130671 |
| 212350_at   | 0.211424069 | 4.448293294 | 3.93E-05    | 0.000337242 |
| 212351_at   | 0.018108342 | 0.461359371 | 0.646249753 | 0.785397128 |
| 212352_s_at | 0.235573932 | 3.069716175 | 0.003244961 | 0.013725517 |
| 212353_at   | 0.156393262 | 2.273215002 | 0.026696748 | 0.077596974 |
| 212354_at   | 0.384983261 | 3.753125247 | 0.000403237 | 0.00238758  |
| 212355_at   | 0.196912269 | 4.333944898 | 5.83E-05    | 0.000468254 |
| 212356_at   | 0.200963517 | 4.97610252  | 6.02E-06    | 7.01E-05    |
| 212357_at   | -0.10679306 | -3.07372015 | 0.003207767 | 0.013590729 |
| 212358_at   | -0.28732194 | -5.3628401  | 1.46E-06    | 2.18E-05    |
| 212359_s_at | 0.086940846 | 1.961277611 | 0.054606548 | 0.136744318 |
| 212360_at   | -0.55221246 | -6.23493598 | 5.39E-08    | 1.56E-06    |
| 212361_s_at | -0.79457509 | -7.31311415 | 8.29E-10    | 8.36E-08    |
| 212362_at   | 0.065562063 | 1.585990125 | 0.118126647 | 0.246754667 |
| 212363_x_at | -0.13689952 | -1.42746243 | 0.158757083 | 0.306579594 |
| 212364_at   | 0.060405574 | 1.809767205 | 0.075463886 | 0.175475131 |
| 212365_at   | 0.008429829 | 0.193026084 | 0.847606378 | 0.916266944 |
| 212366_at   | 0.136123455 | 3.576402301 | 0.00070645  | 0.003822356 |
| 212367_at   | 0.141329738 | 1.964027512 | 0.054278847 | 0.136044513 |
| 212368_at   | 0.273859245 | 4.559161946 | 2.67E-05    | 0.000243337 |
| 212369_at   | 0.043065502 | 1.317964536 | 0.19264749  | 0.352238546 |
| 212370_x_at | 0.007865411 | 0.165729069 | 0.868940947 | 0.929037794 |
| 212371_at   | -0.22715108 | -3.55111166 | 0.000764589 | 0.004083956 |
| 212372_at   | -0.57275949 | -8.33315584 | 1.58E-11    | 7.00E-09    |
| 212373_at   | -0.01596924 | -0.24621821 | 0.806374229 | 0.891005006 |
| 212374_at   | 0.011811194 | 0.344369126 | 0.731802199 | 0.843495741 |
| 212375_at   | -0.04062609 | -1.08686378 | 0.281550022 | 0.458799446 |
| 212376_s_at | 0.0307328   | 0.868895803 | 0.388451031 | 0.571186861 |
| 212377_s_at | 0.692285375 | 6.600492378 | 1.32E-08    | 5.52E-07    |
| 212378_at   | -0.00262166 | -0.07991875 | 0.936574341 | 0.967085173 |
| 212379_at   | -0.00976454 | -0.229437   | 0.819328675 | 0.899311018 |
| 212380_at   | 0.074919737 | 2.158530419 | 0.034996773 | 0.096233051 |
| 212381_at   | -0.02971245 | -1.04671092 | 0.299533674 | 0.478851015 |
| 212382_at   | 0.526013062 | 3.995253989 | 0.000182996 | 0.001223771 |
| 212383_at   | -0.2250384  | -4.35894187 | 5.35E-05    | 0.000436535 |
| 212384_at   | 0.033350529 | 0.857381817 | 0.394728872 | 0.577359606 |
| 212385_at   | 0.201565449 | 3.430554225 | 0.00111008  | 0.005556245 |
| 212386_at   | 0.790118875 | 9.024621969 | 1.11E-12    | 2.64E-09    |
| 212387_at   | 0.606189754 | 8.654913726 | 4.57E-12    | 4.01E-09    |
| 212388_at   | 0.072318942 | 1.893315195 | 0.063259693 | 0.153294051 |
| 212389_at   | -0.17014624 | -3.65521405 | 0.000551101 | 0.003109431 |

|             |             |             |             |             |
|-------------|-------------|-------------|-------------|-------------|
| 212390_at   | 0.045769127 | 0.710162584 | 0.480421592 | 0.655663169 |
| 212391_x_at | -0.09009357 | -1.79833435 | 0.077278204 | 0.178708346 |
| 212392_s_at | 0.161755436 | 3.090201485 | 0.003058822 | 0.01305557  |
| 212393_at   | -0.16570532 | -2.13799473 | 0.036701027 | 0.099905121 |
| 212394_at   | -0.16666676 | -4.89763083 | 8.00E-06    | 8.86E-05    |
| 212395_s_at | -0.09438299 | -2.6388131  | 0.010642162 | 0.03665661  |
| 212396_s_at | -0.04435696 | -1.02875359 | 0.307825548 | 0.488195152 |
| 212397_at   | 0.452304868 | 4.009980904 | 0.000174276 | 0.001173006 |
| 212398_at   | 0.447057803 | 4.24486345  | 7.91E-05    | 0.000605179 |
| 212399_s_at | 0.361258547 | 6.152750043 | 7.38E-08    | 1.99E-06    |
| 212400_at   | -0.11125256 | -1.72132548 | 0.090470706 | 0.201701926 |
| 212401_s_at | 0.192904029 | 3.485396636 | 0.000937704 | 0.00483032  |
| 212402_at   | 0.39306232  | 4.081998822 | 0.000137095 | 0.000961433 |
| 212403_at   | 0.045715268 | 0.952523897 | 0.344746128 | 0.527650477 |
| 212404_s_at | -0.09961787 | -1.85116494 | 0.069190125 | 0.164280139 |
| 212405_s_at | 0.014657202 | 0.459672102 | 0.647453451 | 0.78614893  |
| 212406_s_at | -0.11444855 | -1.4383711  | 0.155651395 | 0.302122569 |
| 212407_at   | -0.10467871 | -2.36017042 | 0.021617748 | 0.06559812  |
| 212408_at   | 0.334274032 | 4.501597041 | 3.26E-05    | 0.000287492 |
| 212409_s_at | 0.001932851 | 0.046334409 | 0.963201349 | 0.981137201 |
| 212410_at   | 0.15154288  | 2.037901042 | 0.046084861 | 0.119752579 |
| 212411_at   | -0.2684851  | -5.15404534 | 3.15E-06    | 4.12E-05    |
| 212412_at   | 0.39859567  | 5.074929262 | 4.20E-06    | 5.23E-05    |
| 212413_at   | 0.023048599 | 0.776483036 | 0.440588591 | 0.620964532 |
| 212414_s_at | 0.204824929 | 4.779260642 | 1.22E-05    | 0.000126053 |
| 212415_at   | 0.039708635 | 1.039074593 | 0.303040923 | 0.482765556 |
| 212416_at   | -0.32162653 | -5.20561722 | 2.60E-06    | 3.52E-05    |
| 212417_at   | -0.17277578 | -2.94631203 | 0.004609383 | 0.018444135 |
| 212418_at   | 0.348079682 | 5.540566735 | 7.51E-07    | 1.26E-05    |
| 212419_at   | 0.640427166 | 8.234371988 | 2.32E-11    | 9.41E-09    |
| 212420_at   | 0.140930318 | 4.257106861 | 7.59E-05    | 0.000584953 |
| 212421_at   | 0.144444114 | 1.770896192 | 0.081781584 | 0.18673594  |
| 212422_at   | 0.010790705 | 0.281945964 | 0.778978863 | 0.873519592 |
| 212423_at   | 0.638337989 | 7.639671173 | 2.33E-10    | 3.56E-08    |
| 212424_at   | 0.018799727 | 0.519468351 | 0.605391939 | 0.755468788 |
| 212425_at   | -0.47924412 | -7.35581526 | 7.02E-10    | 7.36E-08    |
| 212426_s_at | 0.133005078 | 1.524829031 | 0.132684047 | 0.269185598 |
| 212427_at   | -0.30396329 | -3.54954889 | 0.000768327 | 0.004099462 |
| 212428_at   | -0.52545857 | -4.8189545  | 1.06E-05    | 0.000112076 |
| 212429_s_at | -0.02344904 | -0.5813529  | 0.563233489 | 0.724020798 |
| 212430_at   | 0.308661519 | 6.246214605 | 5.16E-08    | 1.50E-06    |
| 212431_at   | -0.07080964 | -2.25214157 | 0.028076673 | 0.080731048 |
| 212432_at   | -0.18037495 | -3.57858777 | 0.000701629 | 0.003802715 |
| 212433_x_at | -0.08787503 | -1.70901012 | 0.092743804 | 0.205590303 |
| 212434_at   | -0.11925114 | -1.95982938 | 0.054779811 | 0.137077587 |
| 212435_at   | -0.16021162 | -3.39173749 | 0.001249812 | 0.006144163 |
| 212436_at   | -0.00276748 | -0.07180015 | 0.943005587 | 0.97058647  |
| 212437_at   | 0.279658353 | 5.071416571 | 4.26E-06    | 5.28E-05    |
| 212438_at   | -0.17740797 | -3.49042814 | 0.000923231 | 0.004768409 |
| 212439_at   | -0.0694312  | -1.90039279 | 0.062307379 | 0.151528617 |
| 212440_at   | -0.09506831 | -1.53465294 | 0.130254045 | 0.265607235 |
| 212441_at   | 0.137072211 | 2.632298822 | 0.010825913 | 0.037169217 |
| 212442_s_at | -0.3416571  | -4.49050288 | 3.39E-05    | 0.000297706 |
| 212443_at   | 0.083928958 | 2.077759425 | 0.042124721 | 0.111451459 |
| 212444_at   | 0.002395921 | 0.059460824 | 0.952787499 | 0.975755703 |
| 212445_s_at | -0.36998021 | -7.14418684 | 1.60E-09    | 1.26E-07    |
| 212446_s_at | -0.30045773 | -5.18986979 | 2.76E-06    | 3.69E-05    |
| 212447_at   | 0.194945157 | 4.266457192 | 7.35E-05    | 0.000569336 |
| 212448_at   | -0.58865593 | -7.01127153 | 2.68E-09    | 1.78E-07    |
| 212449_s_at | 0.037808237 | 0.48948377  | 0.626327628 | 0.771124913 |
| 212450_at   | 0.270211072 | 3.935073601 | 0.000223203 | 0.001448856 |
| 212451_at   | 0.340554205 | 3.587850805 | 0.00068154  | 0.003712747 |
| 212452_x_at | 0.169408209 | 3.172343485 | 0.002408235 | 0.010645782 |
| 212453_at   | -0.38030975 | -4.08834539 | 0.000134213 | 0.00094431  |
| 212454_x_at | 0.05726227  | 0.713107613 | 0.478611044 | 0.654131032 |
| 212455_at   | 0.355302831 | 5.886155717 | 2.04E-07    | 4.39E-06    |
| 212456_at   | -0.00583754 | -0.1629557  | 0.871114297 | 0.930426599 |
| 212457_at   | 0.136179085 | 2.768586411 | 0.007526773 | 0.027645178 |
| 212458_at   | -0.09358509 | -1.56549577 | 0.122854484 | 0.254053886 |
| 212459_x_at | 0.363467275 | 3.839428771 | 0.000305123 | 0.001890026 |
| 212460_at   | 0.274543123 | 2.836295554 | 0.006257591 | 0.023725593 |
| 212461_at   | -0.02677499 | -0.25632793 | 0.798595896 | 0.885892313 |
| 212462_at   | 0.348909244 | 5.232575196 | 2.36E-06    | 3.24E-05    |
| 212463_at   | 0.453595556 | 4.2015615   | 9.16E-05    | 0.000684705 |
| 212464_s_at | 0.183082734 | 1.620899136 | 0.110411527 | 0.234563481 |

|             |             |             |             |             |
|-------------|-------------|-------------|-------------|-------------|
| 212465_at   | 0.086687631 | 1.844754873 | 0.070131819 | 0.165930025 |
| 212466_at   | -0.01104242 | -0.27112432 | 0.787248751 | 0.878615847 |
| 212467_at   | 0.087402991 | 2.838751167 | 0.006215509 | 0.02359697  |
| 212468_at   | 0.53410731  | 6.192811345 | 6.33E-08    | 1.77E-06    |
| 212469_at   | 0.247299985 | 5.717405412 | 3.86E-07    | 7.35E-06    |
| 212470_at   | 0.345400929 | 5.329570309 | 1.65E-06    | 2.42E-05    |
| 212471_at   | -0.05631379 | -1.76539509 | 0.082710268 | 0.18831698  |
| 212472_at   | 0.014970091 | 0.430606829 | 0.668334873 | 0.800139891 |
| 212473_s_at | -0.33419415 | -3.56911786 | 0.000722749 | 0.003897803 |
| 212474_at   | -0.32157125 | -3.61346928 | 0.000628797 | 0.003472834 |
| 212475_at   | -0.10329742 | -3.2543848  | 0.001889859 | 0.008699309 |
| 212476_at   | 0.281764795 | 3.411378545 | 0.001177147 | 0.005840909 |
| 212477_at   | 0.009995729 | 0.367383674 | 0.714657113 | 0.832635679 |
| 212478_at   | -0.0468676  | -1.47702464 | 0.145026415 | 0.287161425 |
| 212479_s_at | 0.079493917 | 2.357148379 | 0.02177867  | 0.066002057 |
| 212480_at   | 0.244348357 | 5.487217548 | 9.17E-07    | 1.49E-05    |
| 212481_s_at | -0.09875322 | -1.88138435 | 0.064892952 | 0.156416326 |
| 212482_at   | -0.00439234 | -0.06741809 | 0.9464785   | 0.972391833 |
| 212483_at   | 0.370175887 | 6.822427395 | 5.58E-09    | 2.97E-07    |
| 212484_at   | -0.15970237 | -4.48661955 | 3.44E-05    | 0.000301314 |
| 212485_at   | -0.03634715 | -0.62498933 | 0.534405651 | 0.701037815 |
| 212486_s_at | 0.380552504 | 3.996362932 | 0.000182325 | 0.001219831 |
| 212487_at   | 0.100053792 | 2.071582932 | 0.042718361 | 0.11264863  |
| 212488_at   | 0.204265523 | 3.357866668 | 0.001385196 | 0.006699185 |
| 212489_at   | 0.123566079 | 2.035816363 | 0.046300557 | 0.120169436 |
| 212490_at   | -0.09722836 | -2.13479187 | 0.036973268 | 0.100493175 |
| 212491_s_at | 0.082757595 | 1.717784623 | 0.0911195   | 0.202854928 |
| 212492_s_at | 0.177253176 | 3.787654998 | 0.000360811 | 0.002170013 |
| 212493_s_at | 0.28525683  | 5.885379702 | 2.05E-07    | 4.40E-06    |
| 212494_at   | 0.421325104 | 6.886433711 | 4.35E-09    | 2.51E-07    |
| 212495_at   | 0.102679026 | 2.915642094 | 0.005022908 | 0.019792261 |
| 212496_s_at | 0.196275871 | 3.972668033 | 0.000197192 | 0.001301755 |
| 212497_at   | -0.01401627 | -0.32283347 | 0.74797113  | 0.854682086 |
| 212498_at   | 0.249095883 | 4.790758474 | 1.17E-05    | 0.000121767 |
| 212499_s_at | 0.226865452 | 3.670004232 | 0.000525842 | 0.002989561 |
| 212500_at   | -0.03438914 | -0.72008043 | 0.474339566 | 0.650381466 |
| 212501_at   | 0.21613831  | 1.557437554 | 0.124754468 | 0.257161878 |
| 212502_at   | -0.32199729 | -3.40991793 | 0.00118241  | 0.005860009 |
| 212503_s_at | 0.053236178 | 0.963070503 | 0.339471857 | 0.522334136 |
| 212504_at   | 0.120519819 | 2.964044579 | 0.004384951 | 0.017701404 |
| 212505_s_at | 0.146173398 | 3.915378139 | 0.000238118 | 0.001530116 |
| 212506_at   | 0.255461727 | 3.925336226 | 0.000230461 | 0.001489263 |
| 212507_at   | -0.13519744 | -1.90812203 | 0.061281308 | 0.149496956 |
| 212508_at   | -0.70366649 | -6.11989508 | 8.37E-08    | 2.20E-06    |
| 212509_s_at | -0.6501325  | -7.76048001 | 1.46E-10    | 2.65E-08    |
| 212510_at   | -0.32740129 | -5.80481133 | 2.78E-07    | 5.60E-06    |
| 212511_at   | -0.15761555 | -1.79926534 | 0.077129111 | 0.178455904 |
| 212512_s_at | -0.19630606 | -3.4478766  | 0.001052625 | 0.005319904 |
| 212513_s_at | -0.04588087 | -0.6153804  | 0.54068755  | 0.706186422 |
| 212514_x_at | -0.08610993 | -0.90260271 | 0.370434153 | 0.553693752 |
| 212515_s_at | 0.090438378 | 0.902926839 | 0.370263524 | 0.553531274 |
| 212516_at   | 0.20959735  | 3.534016614 | 0.000806438 | 0.004257185 |
| 212517_at   | -0.20184778 | -4.07322064 | 0.000141179 | 0.000984794 |
| 212518_at   | -0.19615933 | -3.51802596 | 0.00084755  | 0.004438562 |
| 212519_at   | 0.099456902 | 1.096684621 | 0.277268226 | 0.453861093 |
| 212520_s_at | -0.04649846 | -0.68247579 | 0.497628749 | 0.670695935 |
| 212521_s_at | 0.009246745 | 0.142869333 | 0.886883781 | 0.93925616  |
| 212522_at   | 0.264431741 | 2.388001767 | 0.020184936 | 0.062055799 |
| 212523_s_at | -0.04356617 | -1.82937181 | 0.072435811 | 0.170008468 |
| 212524_x_at | 0.022383338 | 0.656506849 | 0.514069419 | 0.684679583 |
| 212525_s_at | -0.01641144 | -0.34045223 | 0.734734169 | 0.845566758 |
| 212526_at   | 0.170410777 | 2.281951189 | 0.02614253  | 0.076428465 |
| 212527_at   | -0.0426665  | -1.09984062 | 0.27590195  | 0.452367077 |
| 212528_at   | -0.03245069 | -0.73518969 | 0.465157921 | 0.643000149 |
| 212529_at   | -0.03942563 | -0.9993032  | 0.321758847 | 0.50371467  |
| 212530_at   | 0.665269548 | 6.812006832 | 5.81E-09    | 3.06E-07    |
| 212531_at   | -0.01880334 | -0.30192269 | 0.763780563 | 0.8641742   |
| 212532_s_at | 0.043337055 | 1.23453532  | 0.221933975 | 0.388891324 |
| 212533_at   | 0.131939524 | 2.365388192 | 0.021342401 | 0.064948564 |
| 212534_at   | 0.439613537 | 7.172017231 | 1.44E-09    | 1.18E-07    |
| 212535_at   | -0.17074749 | -2.30501637 | 0.02472801  | 0.073077048 |
| 212536_at   | 0.178360087 | 4.729272585 | 1.46E-05    | 0.000146508 |
| 212537_x_at | -0.01409869 | -0.29814364 | 0.766648716 | 0.866081859 |
| 212538_at   | 0.290604132 | 3.82967508  | 0.00031494  | 0.001939281 |
| 212539_at   | 0.170324444 | 3.33930238  | 0.001465168 | 0.007027399 |

|             |             |             |             |             |
|-------------|-------------|-------------|-------------|-------------|
| 212540_at   | 0.069962425 | 1.699145374 | 0.094598326 | 0.208717832 |
| 212541_at   | 0.031483812 | 1.063672874 | 0.291842993 | 0.470302166 |
| 212542_s_at | 0.234646941 | 5.688971193 | 4.30E-07    | 8.03E-06    |
| 212543_at   | 0.078981434 | 1.691775116 | 0.096003704 | 0.211016452 |
| 212544_at   | -0.39098546 | -4.21147797 | 8.86E-05    | 0.000665169 |
| 212545_s_at | 0.044688501 | 1.314548888 | 0.193786354 | 0.353786753 |
| 212546_s_at | 0.405973122 | 4.07665293  | 0.000139568 | 0.00097508  |
| 212547_at   | 0.237494771 | 5.584367033 | 6.37E-07    | 1.10E-05    |
| 212548_s_at | 0.474905297 | 6.525369546 | 1.76E-08    | 6.73E-07    |
| 212549_at   | 0.105637932 | 2.519669807 | 0.014494971 | 0.047216419 |
| 212550_at   | 0.061922311 | 1.618490428 | 0.110930421 | 0.235386116 |
| 212551_at   | -0.85663583 | -7.09838331 | 1.91E-09    | 1.41E-07    |
| 212552_at   | 0.177288724 | 3.299587681 | 0.00165114  | 0.007770113 |
| 212553_at   | -0.01354906 | -0.32588351 | 0.745674049 | 0.852864097 |
| 212554_at   | -0.9592031  | -7.06844026 | 2.15E-09    | 1.53E-07    |
| 212555_at   | -0.40307098 | -6.77047306 | 6.82E-09    | 3.42E-07    |
| 212556_at   | 0.338423096 | 6.762440249 | 7.04E-09    | 3.50E-07    |
| 212557_at   | 0.295217809 | 3.78919373  | 0.000359024 | 0.002163339 |
| 212558_at   | -0.10822009 | -2.58603486 | 0.012216339 | 0.041063636 |
| 212559_at   | -0.45393257 | -5.40153555 | 1.26E-06    | 1.93E-05    |
| 212560_at   | 0.371693027 | 3.934955716 | 0.000223289 | 0.001449207 |
| 212561_at   | 0.327275325 | 5.708249185 | 4.00E-07    | 7.57E-06    |
| 212562_s_at | -0.0135742  | -0.27868124 | 0.781471106 | 0.875110485 |
| 212563_at   | -0.20336682 | -3.81606047 | 0.000329152 | 0.002011825 |
| 212564_at   | -0.0503709  | -1.65795195 | 0.102674558 | 0.222053295 |
| 212565_at   | 0.232410216 | 3.478386956 | 0.000958226 | 0.004921287 |
| 212566_at   | 0.569417998 | 7.937212235 | 7.33E-11    | 1.78E-08    |
| 212567_s_at | 0.479099587 | 7.026054489 | 2.53E-09    | 1.71E-07    |
| 212568_s_at | -0.42377417 | -5.14597712 | 3.24E-06    | 4.22E-05    |
| 212569_at   | 0.145605038 | 3.292628523 | 0.00168594  | 0.007899773 |
| 212570_at   | 0.145954855 | 1.595144111 | 0.116062748 | 0.243478987 |
| 212571_at   | 0.191549083 | 4.643689295 | 1.98E-05    | 0.000189574 |
| 212572_at   | 0.161404899 | 2.660221713 | 0.01005814  | 0.035061102 |
| 212573_at   | 0.156565423 | 1.536447056 | 0.129814108 | 0.264964017 |
| 212574_x_at | -0.15079929 | -2.09591904 | 0.040420641 | 0.107772299 |
| 212575_at   | -0.17939253 | -3.03183813 | 0.003617311 | 0.015046991 |
| 212576_at   | -0.09344116 | -1.53103169 | 0.131145629 | 0.266996979 |
| 212577_at   | 0.025898577 | 0.60934525  | 0.544652335 | 0.70902689  |
| 212578_x_at | 0.016985247 | 0.39771554  | 0.692285845 | 0.817341337 |
| 212579_at   | 0.016454116 | 0.54088232  | 0.590640078 | 0.744626339 |
| 212580_at   | 0.003111002 | 0.081937803 | 0.934975564 | 0.966170385 |
| 212581_x_at | -0.20284762 | -4.60832917 | 2.24E-05    | 0.000210255 |
| 212582_at   | -0.45255558 | -4.77782221 | 1.23E-05    | 0.000126504 |
| 212583_at   | 0.008192696 | 0.212792621 | 0.832227661 | 0.907280602 |
| 212584_at   | 0.113114112 | 2.654562202 | 0.010209615 | 0.035458627 |
| 212585_at   | -0.75653721 | -6.50676043 | 1.89E-08    | 7.10E-07    |
| 212586_at   | 0.365121607 | 4.055899564 | 0.000149586 | 0.00103152  |
| 212587_s_at | 0.264682595 | 3.232959304 | 0.002014038 | 0.009162396 |
| 212588_at   | 0.33387189  | 2.346662788 | 0.022345346 | 0.067335865 |
| 212589_at   | 0.119275838 | 2.036196701 | 0.04626114  | 0.120112871 |
| 212590_at   | 0.010232737 | 0.262192677 | 0.79409293  | 0.882847862 |
| 212591_at   | 0.000862061 | 0.012012772 | 0.990456253 | 0.995467895 |
| 212592_at   | -0.03062942 | -1.72053571 | 0.090615085 | 0.201943222 |
| 212593_s_at | 0.226447101 | 4.399324726 | 4.66E-05    | 0.000387681 |
| 212594_at   | 0.23499759  | 4.893313855 | 8.12E-06    | 8.98E-05    |
| 212595_s_at | -0.15898158 | -1.69605243 | 0.095186024 | 0.209631586 |
| 212596_s_at | 0.287094657 | 5.016765978 | 5.19E-06    | 6.21E-05    |
| 212597_s_at | 0.230315176 | 4.698216422 | 1.63E-05    | 0.00016112  |
| 212598_at   | -0.06352214 | -1.14351629 | 0.257476963 | 0.431244457 |
| 212599_at   | 0.002923433 | 0.046993073 | 0.962678628 | 0.980994217 |
| 212600_s_at | -0.27092399 | -3.3980067  | 0.001226169 | 0.006046555 |
| 212601_at   | 0.090617365 | 2.134662217 | 0.036984325 | 0.100511005 |
| 212602_at   | -0.2494386  | -4.60456586 | 2.27E-05    | 0.000212705 |
| 212603_at   | 0.074385128 | 2.439801169 | 0.017742754 | 0.055873671 |
| 212604_at   | -0.00859697 | -0.12670858 | 0.899605076 | 0.946244733 |
| 212605_s_at | -0.14407874 | -1.70185821 | 0.094085312 | 0.207873283 |
| 212606_at   | 0.119652095 | 2.065707219 | 0.043289812 | 0.11392029  |
| 212607_at   | -0.25942852 | -5.45103723 | 1.05E-06    | 1.66E-05    |
| 212608_s_at | 0.020929659 | 0.335959091 | 0.738102375 | 0.847983916 |
| 212609_s_at | 0.235980311 | 4.699028526 | 1.63E-05    | 0.000160762 |
| 212610_at   | 0.021699158 | 0.468721777 | 0.641008555 | 0.781791135 |
| 212611_at   | 0.035461736 | 0.559265021 | 0.578113371 | 0.735055526 |
| 212612_at   | 0.079143161 | 1.389542665 | 0.169927925 | 0.322323938 |
| 212613_at   | 0.115726855 | 2.244807265 | 0.028571523 | 0.081906965 |
| 212614_at   | 0.199432787 | 2.606081212 | 0.011595051 | 0.039365392 |



|             |             |             |             |             |
|-------------|-------------|-------------|-------------|-------------|
| 212615_at   | 0.067182858 | 1.385069024 | 0.171284742 | 0.324175664 |
| 212616_at   | 0.103748218 | 1.995279376 | 0.050671379 | 0.128839124 |
| 212617_at   | 0.046635274 | 1.338326089 | 0.185962922 | 0.343702858 |
| 212618_at   | 0.024015406 | 0.752544949 | 0.454737595 | 0.633766251 |
| 212619_at   | -0.02308041 | -0.64897277 | 0.518892863 | 0.688325067 |
| 212620_at   | 0.076016486 | 1.436233527 | 0.156256206 | 0.302941279 |
| 212621_at   | 0.16131703  | 4.268131761 | 7.31E-05    | 0.000566484 |
| 212622_at   | 0.057179712 | 1.04241603  | 0.301502819 | 0.481062562 |
| 212623_at   | -0.14653776 | -1.58676673 | 0.11795041  | 0.246524798 |
| 212624_s_at | -0.80505322 | -6.8137613  | 5.77E-09    | 3.05E-07    |
| 212625_at   | 0.136863968 | 3.086342189 | 0.003093108 | 0.013183022 |
| 212626_x_at | 0.14422924  | 3.368705114 | 0.001340433 | 0.006518674 |
| 212627_s_at | 0.085181184 | 1.595019371 | 0.116090676 | 0.243514714 |
| 212628_at   | 0.235997372 | 4.120228317 | 0.0001206   | 0.000864039 |
| 212629_s_at | 0.484232458 | 5.27386859  | 2.02E-06    | 2.87E-05    |
| 212630_at   | 0.147067676 | 3.197809865 | 0.002234526 | 0.010011573 |
| 212631_at   | 0.129043046 | 2.080451925 | 0.041868187 | 0.110851481 |
| 212632_at   | 0.196433488 | 2.656467474 | 0.01015839  | 0.035322397 |
| 212633_at   | 0.166450253 | 2.308955019 | 0.02449338  | 0.072541958 |
| 212634_at   | 0.152609652 | 3.071994947 | 0.003223744 | 0.013649982 |
| 212635_at   | 0.148247957 | 4.118487131 | 0.000121308 | 0.000868691 |
| 212636_at   | 0.477722807 | 6.723144355 | 8.20E-09    | 3.88E-07    |
| 212637_s_at | -0.22332628 | -5.24085106 | 2.29E-06    | 3.16E-05    |
| 212638_s_at | -0.25792391 | -4.69783211 | 1.63E-05    | 0.000161304 |
| 212639_x_at | -0.04440745 | -0.54361417 | 0.588770398 | 0.743298133 |
| 212640_at   | -0.27858797 | -4.22432832 | 8.48E-05    | 0.000641287 |
| 212641_at   | -0.52120754 | -5.0580601  | 4.47E-06    | 5.51E-05    |
| 212642_s_at | -0.38686597 | -6.08666772 | 9.50E-08    | 2.43E-06    |
| 212643_at   | 0.320786954 | 4.254279834 | 7.66E-05    | 0.000589805 |
| 212644_s_at | 0.170432416 | 2.176044923 | 0.033598414 | 0.093213751 |
| 212645_x_at | -0.10247203 | -3.14164773 | 0.00263446  | 0.01150809  |
| 212646_at   | 0.672863104 | 4.953653766 | 6.53E-06    | 7.52E-05    |
| 212647_at   | 0.277449308 | 5.720583168 | 3.82E-07    | 7.28E-06    |
| 212648_at   | -0.01228015 | -0.16774278 | 0.867363534 | 0.928239531 |
| 212649_at   | 0.048696118 | 1.453505412 | 0.151421256 | 0.296266473 |
| 212650_at   | 0.198680587 | 2.837494993 | 0.006237003 | 0.023663706 |
| 212651_at   | 0.297025682 | 5.178785143 | 2.87E-06    | 3.81E-05    |
| 212652_s_at | -0.02526863 | -0.35066985 | 0.727094259 | 0.840649246 |
| 212653_s_at | -0.15804009 | -2.28748948 | 0.02579649  | 0.07559208  |
| 212654_at   | 0.135925268 | 1.712588464 | 0.092078538 | 0.204510341 |
| 212655_at   | 0.14052813  | 2.698727858 | 0.009080853 | 0.032280845 |
| 212656_at   | -0.05970933 | -1.77903207 | 0.080424022 | 0.184522326 |
| 212657_s_at | -0.03428028 | -0.69313649 | 0.49096361  | 0.665135216 |
| 212658_at   | 0.128022423 | 2.961050199 | 0.004422123 | 0.017828913 |
| 212659_s_at | -0.05369552 | -1.03214119 | 0.306249497 | 0.486360036 |
| 212660_at   | -0.01445093 | -0.1924678  | 0.84804163  | 0.916464398 |
| 212661_x_at | -0.28519095 | -4.63368633 | 2.05E-05    | 0.000195415 |
| 212662_at   | -0.02402176 | -0.61123869 | 0.543406846 | 0.707962301 |
| 212663_at   | 0.101174233 | 3.352151833 | 0.001409364 | 0.006805022 |
| 212664_at   | -0.49855963 | -4.54731347 | 2.78E-05    | 0.000251794 |
| 212665_at   | 0.330398621 | 3.21320152  | 0.00213532  | 0.009628871 |
| 212666_at   | -0.04105379 | -0.93663041 | 0.352795066 | 0.535986309 |
| 212667_at   | 0.516727642 | 3.65552311  | 0.000550562 | 0.00310678  |
| 212668_at   | -0.08924319 | -1.99989425 | 0.050156526 | 0.127769919 |
| 212669_at   | 0.338948644 | 4.380253251 | 4.97E-05    | 0.000409712 |
| 212670_at   | 0.18817141  | 2.996388495 | 0.004001546 | 0.016404063 |
| 212671_s_at | 0.242774283 | 1.831931284 | 0.072048115 | 0.169413492 |
| 212672_at   | 0.005204485 | 0.20082678  | 0.841529835 | 0.912944251 |
| 212673_at   | -0.132058   | -3.46800359 | 0.000989411 | 0.005051842 |
| 212674_s_at | -0.12655149 | -3.02747222 | 0.003662702 | 0.015213149 |
| 212675_s_at | -0.17587659 | -2.33958748 | 0.022735112 | 0.068303149 |
| 212676_at   | -0.02999994 | -0.53766779 | 0.592843683 | 0.746197987 |
| 212677_s_at | -0.02931074 | -0.60030323 | 0.550620085 | 0.713511927 |
| 212678_at   | -0.19227624 | -3.05063356 | 0.003427828 | 0.014386    |
| 212679_at   | 0.007101461 | 0.206019977 | 0.837489804 | 0.910329174 |
| 212680_x_at | 0.303231748 | 5.204569967 | 2.61E-06    | 3.53E-05    |
| 212681_at   | 0.027839908 | 0.273311213 | 0.785575507 | 0.877701572 |
| 212682_s_at | 0.067036605 | 2.218954205 | 0.030377823 | 0.085939857 |
| 212683_at   | -0.12785261 | -2.60238832 | 0.011707297 | 0.039653089 |
| 212684_at   | 0.168148731 | 4.524679851 | 3.01E-05    | 0.000269079 |
| 212685_s_at | 0.043171565 | 1.061387032 | 0.292871404 | 0.471387214 |
| 212686_at   | 0.072095608 | 0.762249503 | 0.448970141 | 0.628417841 |
| 212687_at   | 0.28845768  | 3.819617776 | 0.00032538  | 0.001992041 |
| 212688_at   | -0.41185809 | -5.58040938 | 6.47E-07    | 1.11E-05    |
| 212689_s_at | 0.360144923 | 4.141620132 | 0.000112226 | 0.000811191 |

|             |             |             |             |             |
|-------------|-------------|-------------|-------------|-------------|
| 212690_at   | -0.47979609 | -6.07419037 | 9.97E-08    | 2.51E-06    |
| 212691_at   | 0.145757449 | 3.213524766 | 0.002133282 | 0.009622592 |
| 212692_s_at | -0.05990411 | -1.32576249 | 0.190066373 | 0.348834519 |
| 212693_at   | 0.030408067 | 0.693412683 | 0.490791586 | 0.664955256 |
| 212694_s_at | -0.04468839 | -0.75191127 | 0.455115677 | 0.634123965 |
| 212695_at   | -0.10469637 | -2.48071218 | 0.01600529  | 0.051313373 |
| 212696_s_at | -0.07885853 | -1.42270698 | 0.160125926 | 0.308505954 |
| 212697_at   | 0.040481449 | 0.854157907 | 0.396497884 | 0.579056383 |
| 212698_s_at | 0.440600996 | 3.391668385 | 0.001250075 | 0.006144178 |
| 212699_at   | -0.40521428 | -5.42740995 | 1.15E-06    | 1.78E-05    |
| 212700_x_at | 0.003569615 | 0.09586354  | 0.923956224 | 0.960201175 |
| 212701_at   | -0.16318791 | -4.05148136 | 0.000151806 | 0.001043772 |
| 212702_s_at | 0.16662892  | 3.809705001 | 0.000335995 | 0.002046932 |
| 212703_at   | -0.08078956 | -1.69403797 | 0.095570405 | 0.210250187 |
| 212704_at   | 0.124921563 | 2.716976617 | 0.008648761 | 0.031004287 |
| 212705_x_at | -0.07549541 | -1.369045   | 0.176213021 | 0.330899291 |
| 212706_at   | 0.296853764 | 3.442443289 | 0.001070335 | 0.005389908 |
| 212707_s_at | 0.170120737 | 2.663741396 | 0.009964975 | 0.034801489 |
| 212708_at   | -0.27739842 | -2.45642903 | 0.01701709  | 0.054003252 |
| 212709_at   | 0.145568058 | 4.007794508 | 0.000175545 | 0.001179946 |
| 212710_at   | -0.36383928 | -5.86015543 | 2.25E-07    | 4.73E-06    |
| 212711_at   | -0.3538745  | -5.49980857 | 8.75E-07    | 1.43E-05    |
| 212712_at   | -0.30763225 | -5.59238202 | 6.18E-07    | 1.07E-05    |
| 212713_at   | 0.07834704  | 1.700715001 | 0.094301221 | 0.208237075 |
| 212714_at   | 0.248351651 | 3.548669622 | 0.000770438 | 0.004107328 |
| 212715_s_at | 0.284997749 | 4.195661023 | 9.35E-05    | 0.000695628 |
| 212716_s_at | -0.14699673 | -2.11694503 | 0.038522761 | 0.103751157 |
| 212717_at   | 0.206221143 | 4.079132354 | 0.000138416 | 0.000969605 |
| 212718_at   | 0.376022457 | 4.197299882 | 9.30E-05    | 0.000692583 |
| 212719_at   | 0.45131151  | 5.433015449 | 1.12E-06    | 1.75E-05    |
| 212720_at   | 0.06182818  | 0.948040882 | 0.347004202 | 0.530017492 |
| 212721_at   | 0.242086278 | 3.814142087 | 0.000331203 | 0.002022427 |
| 212722_s_at | 0.132695783 | 2.203600818 | 0.03149752  | 0.088539351 |
| 212723_at   | 0.375314042 | 4.056362942 | 0.000149355 | 0.001030244 |
| 212724_at   | 0.04319377  | 0.527951949 | 0.59952742  | 0.751228852 |
| 212725_s_at | 0.24684957  | 5.620347588 | 5.57E-07    | 9.87E-06    |
| 212726_at   | 0.195860728 | 3.99155947  | 0.000185249 | 0.001235508 |
| 212727_at   | -0.30739249 | -5.15194792 | 3.17E-06    | 4.15E-05    |
| 212728_at   | -0.16359422 | -3.92729712 | 0.000228981 | 0.001480558 |
| 212729_at   | -0.25978345 | -4.55458351 | 2.71E-05    | 0.000246604 |
| 212730_at   | 0.646051928 | 7.673926403 | 2.04E-10    | 3.31E-08    |
| 212731_at   | -0.06966282 | -0.94277522 | 0.349668794 | 0.532740088 |
| 212732_at   | -0.55385625 | -3.52156872 | 0.000838273 | 0.004399259 |
| 212733_at   | 0.014232955 | 0.257523221 | 0.797677584 | 0.885351044 |
| 212734_x_at | 0.086893736 | 1.78377005  | 0.079642123 | 0.183029042 |
| 212735_at   | -0.04676728 | -1.12775094 | 0.264024132 | 0.438865122 |
| 212736_at   | -0.29455524 | -3.60485385 | 0.000646084 | 0.003552069 |
| 212737_at   | 0.273952415 | 4.48052324  | 3.51E-05    | 0.000307244 |
| 212738_at   | 0.269172295 | 7.395798558 | 6.01E-10    | 6.57E-08    |
| 212739_s_at | 0.103204193 | 1.7545343   | 0.08456951  | 0.191633146 |
| 212740_at   | -0.1598434  | -2.38085206 | 0.020544669 | 0.062915057 |
| 212741_at   | 0.209401064 | 2.252015703 | 0.028085101 | 0.080744892 |
| 212742_at   | -0.10870249 | -2.10449709 | 0.039636749 | 0.106112711 |
| 212743_at   | -0.04827322 | -1.78830336 | 0.078899945 | 0.181639391 |
| 212744_at   | 0.149388155 | 3.74173258  | 0.000418254 | 0.002462471 |
| 212745_s_at | 0.103965345 | 3.005007858 | 0.003904772 | 0.01607221  |
| 212746_s_at | 0.02768634  | 0.738161769 | 0.463363835 | 0.641293712 |
| 212747_at   | 0.104343618 | 2.150680115 | 0.035639911 | 0.097647063 |
| 212748_at   | -0.0181527  | -0.54177282 | 0.590030313 | 0.744244749 |
| 212749_s_at | -0.1422301  | -1.36757585 | 0.17667024  | 0.331489414 |
| 212750_at   | -0.7080878  | -8.40725562 | 1.19E-11    | 6.05E-09    |
| 212751_at   | -0.54114423 | -4.78754056 | 1.19E-05    | 0.00012292  |
| 212752_at   | -0.05745006 | -1.31990507 | 0.192002717 | 0.351452346 |
| 212753_at   | 0.041858851 | 0.830839037 | 0.409438945 | 0.591595659 |
| 212754_s_at | 0.135227697 | 2.240964243 | 0.028833878 | 0.082510159 |
| 212755_at   | 0.019916344 | 0.649537594 | 0.518530421 | 0.688007647 |
| 212756_s_at | 0.058698998 | 1.542592828 | 0.128316062 | 0.26257331  |
| 212757_s_at | 0.42843257  | 4.521590768 | 3.04E-05    | 0.000271406 |
| 212758_s_at | 0.236743243 | 3.044643067 | 0.003487191 | 0.014602726 |
| 212759_s_at | 0.178774344 | 2.740386622 | 0.008122068 | 0.029449251 |
| 212760_at   | -0.00417137 | -0.11468112 | 0.909090148 | 0.951901431 |
| 212761_at   | 0.712134739 | 6.678972582 | 9.72E-09    | 4.37E-07    |
| 212762_s_at | 0.72242869  | 6.305168633 | 4.11E-08    | 1.27E-06    |
| 212763_at   | -0.18452264 | -5.08916226 | 3.99E-06    | 5.00E-05    |
| 212764_at   | 0.273266535 | 3.857627586 | 0.000287585 | 0.001796583 |

|             |             |             |             |             |
|-------------|-------------|-------------|-------------|-------------|
| 212765_at   | -0.08298356 | -1.10922079 | 0.27186898  | 0.447774773 |
| 212766_s_at | 0.024736938 | 0.619076882 | 0.538266474 | 0.70434518  |
| 212767_at   | 0.033705099 | 0.958672204 | 0.341664924 | 0.524659456 |
| 212768_s_at | -0.00754053 | -0.39652415 | 0.693159532 | 0.817983888 |
| 212769_at   | 0.119365571 | 3.497184709 | 0.00090413  | 0.004688175 |
| 212770_at   | 0.227411772 | 4.254749655 | 7.65E-05    | 0.000588962 |
| 212771_at   | -0.24087219 | -3.37316894 | 0.001322398 | 0.006447103 |
| 212772_s_at | 0.287267284 | 3.332320188 | 0.001496361 | 0.007148622 |
| 212773_s_at | -0.334068   | -3.4237712  | 0.001133379 | 0.00565008  |
| 212774_at   | 0.058348746 | 0.76811977  | 0.445502184 | 0.625666854 |
| 212775_at   | 0.260476096 | 4.678956533 | 1.75E-05    | 0.00017026  |
| 212776_s_at | 0.158261304 | 2.69639688  | 0.009137447 | 0.032454168 |
| 212777_at   | -0.22759427 | -3.85350034 | 0.000291475 | 0.001817329 |
| 212778_at   | 0.377307671 | 5.188875502 | 2.77E-06    | 3.70E-05    |
| 212779_at   | -0.00102016 | -0.01669087 | 0.986739961 | 0.993520227 |
| 212780_at   | -0.15334727 | -2.8164081  | 0.006608219 | 0.024818026 |
| 212781_at   | 0.119322375 | 3.005072356 | 0.003904056 | 0.016070744 |
| 212782_x_at | -0.0072231  | -0.15610625 | 0.876486121 | 0.933820867 |
| 212783_at   | 0.166104728 | 2.929288471 | 0.004834837 | 0.019188219 |
| 212784_at   | -0.07005167 | -1.68553023 | 0.097207866 | 0.212992791 |
| 212785_s_at | 0.344167305 | 3.984599645 | 0.000189565 | 0.001259035 |
| 212786_at   | 0.060131761 | 1.786164528 | 0.079249385 | 0.182267061 |
| 212787_at   | 0.168334758 | 2.402471956 | 0.019474081 | 0.0603185   |
| 212788_x_at | 0.117655735 | 2.45912611  | 0.016901937 | 0.053702641 |
| 212789_at   | -0.10617544 | -2.2907313  | 0.025595827 | 0.07510036  |
| 212790_x_at | 0.017502083 | 0.38886981  | 0.698782685 | 0.82177754  |
| 212791_at   | -0.33159449 | -5.1319675  | 3.41E-06    | 4.40E-05    |
| 212792_at   | 0.294335522 | 4.159982465 | 0.000105488 | 0.000770592 |
| 212793_at   | 0.561779304 | 6.710229426 | 8.62E-09    | 4.02E-07    |
| 212794_s_at | 0.289642738 | 4.931083307 | 7.09E-06    | 8.06E-05    |
| 212795_at   | 0.254225854 | 3.407628487 | 0.001190704 | 0.005895088 |
| 212796_s_at | 0.293677005 | 6.117457001 | 8.45E-08    | 2.21E-06    |
| 212797_at   | -0.22506637 | -2.1009561  | 0.039958719 | 0.106770002 |
| 212798_s_at | -0.40211078 | -3.96382759 | 0.000203032 | 0.001333221 |
| 212799_at   | -0.14939345 | -2.72261647 | 0.008519084 | 0.030639259 |
| 212800_at   | 0.066168836 | 1.751237993 | 0.085140614 | 0.192683022 |
| 212801_at   | -0.62939318 | -7.17588555 | 1.41E-09    | 1.17E-07    |
| 212802_s_at | 0.186981807 | 3.632178942 | 0.000592762 | 0.003306507 |
| 212803_at   | -0.07660839 | -1.73105167 | 0.088708166 | 0.198746066 |
| 212804_s_at | 0.003215287 | 0.111984461 | 0.91121866  | 0.952991467 |
| 212805_at   | -0.06327633 | -0.70306846 | 0.484798604 | 0.65964255  |
| 212806_at   | -0.31395669 | -2.31034418 | 0.0244111   | 0.072375008 |
| 212807_s_at | 0.134407637 | 1.754293869 | 0.084611058 | 0.191707854 |
| 212808_at   | -0.01846493 | -0.525061   | 0.6015229   | 0.752838857 |
| 212809_at   | 0.027318144 | 0.650609963 | 0.517842667 | 0.687453521 |
| 212810_s_at | 0.125226515 | 1.543778011 | 0.128028763 | 0.262158044 |
| 212811_x_at | -0.19699177 | -2.5475341  | 0.013495095 | 0.044547071 |
| 212812_at   | 0.232901531 | 2.968757698 | 0.004327032 | 0.017511883 |
| 212813_at   | 0.196612416 | 2.370947029 | 0.021052507 | 0.064193126 |
| 212814_at   | 0.248464757 | 4.310078768 | 6.33E-05    | 0.000500914 |
| 212815_at   | -0.04486295 | -1.19324055 | 0.237586648 | 0.406999979 |
| 212816_s_at | 0.337179965 | 4.755490232 | 1.33E-05    | 0.000135321 |
| 212817_at   | -0.03789799 | -0.69353408 | 0.490715985 | 0.664900521 |
| 212818_s_at | 0.004570735 | 0.131737291 | 0.895643617 | 0.944141116 |
| 212819_at   | 0.019939407 | 0.427931545 | 0.670270504 | 0.801469643 |
| 212820_at   | -0.64908711 | -5.29670086 | 1.86E-06    | 2.67E-05    |
| 212821_at   | 0.31053661  | 5.053420985 | 4.55E-06    | 5.59E-05    |
| 212822_at   | 0.276932941 | 5.968617064 | 1.49E-07    | 3.43E-06    |
| 212823_s_at | 0.17775572  | 3.251319638 | 0.001907171 | 0.008764556 |
| 212824_at   | 0.456480886 | 5.478970491 | 9.45E-07    | 1.53E-05    |
| 212825_at   | -0.02590463 | -0.70989709 | 0.480585001 | 0.655826103 |
| 212826_s_at | -0.38938151 | -7.53809695 | 3.46E-10    | 4.65E-08    |
| 212827_at   | -0.00539461 | -0.20924944 | 0.834979662 | 0.908960441 |
| 212828_at   | 0.380136599 | 2.908675004 | 0.005121522 | 0.020101087 |
| 212829_at   | 0.391572658 | 4.455142201 | 3.84E-05    | 0.000331153 |
| 212830_at   | 0.119221764 | 1.945241813 | 0.056551402 | 0.140504516 |
| 212831_at   | 0.135224774 | 2.722666761 | 0.008517936 | 0.030638519 |
| 212832_s_at | 0.002534641 | 0.082794119 | 0.934297575 | 0.965805321 |
| 212833_at   | -0.32667828 | -3.36285778 | 0.001364409 | 0.006612969 |
| 212834_at   | 0.064539144 | 1.509364535 | 0.136582081 | 0.274923496 |
| 212835_at   | -0.08891503 | -2.22538712 | 0.029919205 | 0.084957692 |
| 212836_at   | 0.105707133 | 3.552433228 | 0.000761441 | 0.004069154 |
| 212837_at   | -0.0826192  | -2.56789555 | 0.012804434 | 0.042667445 |
| 212838_at   | 0.072225846 | 1.584494525 | 0.118466642 | 0.247289898 |
| 212839_s_at | 0.122983095 | 3.71737775  | 0.000452175 | 0.002630985 |

|             |             |             |             |             |
|-------------|-------------|-------------|-------------|-------------|
| 212840_at   | 0.506655539 | 5.91994317  | 1.79E-07    | 3.96E-06    |
| 212841_s_at | 0.28142376  | 3.753226393 | 0.000403106 | 0.002387437 |
| 212842_x_at | -0.10540484 | -2.20682274 | 0.031259584 | 0.087987473 |
| 212843_at   | 0.049096062 | 0.902777079 | 0.370342355 | 0.553622659 |
| 212844_at   | 0.002913327 | 0.071200179 | 0.94348102  | 0.970852223 |
| 212845_at   | 0.533210553 | 4.503792843 | 3.24E-05    | 0.000285521 |
| 212846_at   | -0.02689498 | -0.45206753 | 0.652890262 | 0.78955979  |
| 212847_at   | 0.179777759 | 2.834710257 | 0.006284898 | 0.023805801 |
| 212848_s_at | 0.36176358  | 4.237994253 | 8.10E-05    | 0.000616754 |
| 212849_at   | 0.076054565 | 2.269095048 | 0.026961709 | 0.07816377  |
| 212850_s_at | 0.581735506 | 5.920794282 | 1.79E-07    | 3.95E-06    |
| 212851_at   | -0.14898444 | -2.46149824 | 0.016801237 | 0.053428269 |
| 212852_s_at | 0.629902385 | 8.2422119   | 2.25E-11    | 9.22E-09    |
| 212853_at   | -0.02125815 | -0.59930901 | 0.551278285 | 0.713971517 |
| 212854_x_at | 0.213213859 | 4.070216572 | 0.000142604 | 0.000993026 |
| 212855_at   | 0.084142867 | 1.508720561 | 0.136746349 | 0.275155006 |
| 212856_at   | 0.174792824 | 3.537561626 | 0.000797585 | 0.004219713 |
| 212857_x_at | -0.21582241 | -3.45877253 | 0.001017943 | 0.005173877 |
| 212858_at   | 0.215430245 | 3.120867226 | 0.002798758 | 0.012121534 |
| 212859_x_at | 0.576209111 | 4.763101012 | 1.30E-05    | 0.000132237 |
| 212860_at   | 0.016001884 | 0.421307032 | 0.675073147 | 0.804784693 |
| 212861_at   | 0.116940942 | 2.29859746  | 0.025114671 | 0.073985524 |
| 212862_at   | -0.03803136 | -0.73104057 | 0.467669129 | 0.644815595 |
| 212863_x_at | -0.15172838 | -1.94946622 | 0.056033404 | 0.139465632 |
| 212864_at   | 0.08560568  | 1.881395642 | 0.064891389 | 0.156416326 |
| 212865_s_at | 0.006315927 | 0.249581661 | 0.803784196 | 0.889550635 |
| 212866_at   | 0.054070514 | 1.224677468 | 0.225599949 | 0.393049778 |
| 212867_at   | 0.047034657 | 0.538221689 | 0.592463703 | 0.745912103 |
| 212868_x_at | -0.01859816 | -0.58926059 | 0.557952753 | 0.719758246 |
| 212869_x_at | -0.02138988 | -0.6176343  | 0.539210651 | 0.705085214 |
| 212870_at   | 0.191704779 | 3.270931548 | 0.001798931 | 0.008344353 |
| 212871_at   | -0.11450345 | -2.21953488 | 0.030336172 | 0.08586891  |
| 212872_s_at | 0.082122526 | 2.579066819 | 0.012439284 | 0.041677522 |
| 212873_at   | 0.187878642 | 4.22954841  | 8.33E-05    | 0.000631932 |
| 212874_at   | 0.02148156  | 0.477610899 | 0.634704908 | 0.777340041 |
| 212875_s_at | -0.00532656 | -0.09242396 | 0.926676631 | 0.961574924 |
| 212876_at   | 0.048190176 | 1.28055165  | 0.205399497 | 0.368604012 |
| 212877_at   | -0.51414928 | -4.6293727  | 2.08E-05    | 0.000197908 |
| 212878_s_at | -0.27802204 | -2.68035494 | 0.009535772 | 0.033564837 |
| 212879_x_at | 0.142571812 | 3.445217867 | 0.001061256 | 0.005355049 |
| 212880_at   | -0.35339139 | -4.87951006 | 8.54E-06    | 9.36E-05    |
| 212881_at   | 0.230874221 | 4.419831834 | 4.34E-05    | 0.000365512 |
| 212882_at   | -0.09050839 | -2.40285503 | 0.019455571 | 0.060286236 |
| 212883_at   | -0.04567553 | -1.18236186 | 0.241840277 | 0.412253466 |
| 212884_x_at | 0.098703384 | 1.977121304 | 0.052741478 | 0.132930415 |
| 212885_at   | 0.047917247 | 1.404767378 | 0.165372277 | 0.316035995 |
| 212886_at   | 0.177023104 | 3.420871939 | 0.001143478 | 0.005695344 |
| 212887_at   | -0.5528131  | -4.18244359 | 9.78E-05    | 0.000723012 |
| 212888_at   | 0.420692693 | 5.26735866  | 2.07E-06    | 2.92E-05    |
| 212889_x_at | 0.045171997 | 1.165454728 | 0.248559708 | 0.420829278 |
| 212890_at   | 0.296592233 | 7.155623012 | 1.53E-09    | 1.22E-07    |
| 212891_s_at | -0.16343204 | -2.44265095 | 0.017616443 | 0.055565958 |
| 212892_at   | 0.025768005 | 0.727402899 | 0.469877118 | 0.646603694 |
| 212893_at   | 0.301190338 | 4.690243696 | 1.68E-05    | 0.00016458  |
| 212894_at   | -0.05953958 | -1.36905688 | 0.176209328 | 0.330899291 |
| 212895_s_at | -0.05861362 | -0.93248904 | 0.354912251 | 0.538050825 |
| 212896_at   | -0.09030739 | -1.89572598 | 0.062933938 | 0.152695089 |
| 212897_at   | 0.392622928 | 5.447356074 | 1.06E-06    | 1.68E-05    |
| 212898_at   | 0.066159116 | 2.06340615  | 0.043515405 | 0.1144129   |
| 212899_at   | 0.341375793 | 4.577970759 | 2.50E-05    | 0.000230442 |
| 212900_at   | 0.229140433 | 4.915206721 | 7.50E-06    | 8.43E-05    |
| 212901_s_at | -0.03452605 | -0.82387801 | 0.413351458 | 0.595592847 |
| 212902_at   | 0.002649817 | 0.084691507 | 0.932795493 | 0.965100847 |
| 212904_at   | -0.11904337 | -1.17838866 | 0.243407448 | 0.41422457  |
| 212905_at   | 0.088689813 | 1.486779242 | 0.142437219 | 0.283491615 |
| 212906_at   | -0.17542118 | -3.24127119 | 0.001964978 | 0.008975758 |
| 212907_at   | 0.36743294  | 4.225368353 | 8.45E-05    | 0.000639349 |
| 212908_at   | -0.06081951 | -1.48663212 | 0.142475998 | 0.283543542 |
| 212909_at   | 0.131617799 | 1.633692812 | 0.107688333 | 0.230277845 |
| 212910_at   | 0.014847849 | 0.425492694 | 0.67203703  | 0.802594167 |
| 212911_at   | -0.08325372 | -2.08654216 | 0.041292923 | 0.10961412  |
| 212912_at   | -0.06945464 | -1.32095534 | 0.191654431 | 0.35099864  |
| 212913_at   | 0.083439439 | 2.045055696 | 0.045351176 | 0.118182785 |
| 212914_at   | -0.19453564 | -2.8394654  | 0.006203318 | 0.023554226 |
| 212915_at   | 0.264646539 | 3.40991     | 0.001182439 | 0.005860009 |

|             |             |             |             |             |
|-------------|-------------|-------------|-------------|-------------|
| 212916_at   | 0.070626533 | 2.167571722 | 0.034268675 | 0.094685356 |
| 212917_x_at | 0.419782268 | 6.480422422 | 2.09E-08    | 7.60E-07    |
| 212918_at   | 0.149043618 | 2.804414332 | 0.006828344 | 0.025509685 |
| 212919_at   | -0.0271442  | -0.49055004 | 0.625577681 | 0.770562459 |
| 212920_at   | 0.290814799 | 6.317202865 | 3.93E-08    | 1.23E-06    |
| 212921_at   | 0.086554952 | 1.586954548 | 0.117907822 | 0.246458836 |
| 212922_s_at | 0.080407087 | 1.3948969   | 0.168314913 | 0.32019453  |
| 212923_s_at | 0.539267182 | 5.514626164 | 8.27E-07    | 1.37E-05    |
| 212924_s_at | 0.005446011 | 0.145685904 | 0.884669614 | 0.9383907   |
| 212925_at   | -0.01563472 | -0.37668556 | 0.707768631 | 0.827813867 |
| 212926_at   | 0.168711932 | 3.698162934 | 0.000480779 | 0.002770724 |
| 212927_at   | 0.241307176 | 3.676376279 | 0.000515304 | 0.002937873 |
| 212928_at   | -0.53633441 | -5.63693771 | 5.23E-07    | 9.41E-06    |
| 212929_s_at | 0.080301736 | 2.994752781 | 0.004020161 | 0.016457938 |
| 212930_at   | -1.30855091 | -7.31257624 | 8.31E-10    | 8.36E-08    |
| 212931_at   | 0.02152328  | 0.449077124 | 0.65503343  | 0.790974415 |
| 212932_at   | -0.13000001 | -2.28204869 | 0.026136403 | 0.076415551 |
| 212933_x_at | 0.151040147 | 3.570792094 | 0.000718971 | 0.003880709 |
| 212934_at   | -0.04712497 | -0.99905948 | 0.321875892 | 0.503809665 |
| 212935_at   | -0.0858885  | -1.54912606 | 0.126738721 | 0.260243827 |
| 212936_at   | 0.074726981 | 1.658865425 | 0.102489549 | 0.221770627 |
| 212937_s_at | -0.07211942 | -1.3945462  | 0.168420202 | 0.320367398 |
| 212938_at   | 0.024843419 | 0.522815714 | 0.603074834 | 0.753898366 |
| 212939_at   | -0.01519192 | -0.6127483  | 0.54241488  | 0.707205957 |
| 212940_at   | 0.025597141 | 0.634715205 | 0.528085999 | 0.695848671 |
| 212942_s_at | 0.061511795 | 1.10455822  | 0.273868432 | 0.450089283 |
| 212943_at   | -0.20603387 | -3.53063038 | 0.000814982 | 0.004296201 |
| 212944_at   | 0.619497597 | 4.035088889 | 0.000160326 | 0.001093435 |
| 212945_s_at | 0.142186873 | 3.540399545 | 0.000790564 | 0.004189716 |
| 212946_at   | -0.15010187 | -3.65946194 | 0.00054373  | 0.00307522  |
| 212947_at   | 0.13394204  | 3.185082241 | 0.002319816 | 0.010325388 |
| 212948_at   | -0.34217526 | -5.35619384 | 1.49E-06    | 2.22E-05    |
| 212949_at   | 0.02152345  | 0.555487759 | 0.580676863 | 0.737042871 |
| 212950_at   | 0.224689538 | 2.633661482 | 0.010787238 | 0.037050665 |
| 212951_at   | 0.198472528 | 3.182238204 | 0.002339288 | 0.010393425 |
| 212952_at   | 0.036170601 | 0.530603851 | 0.597699648 | 0.749926802 |
| 212953_x_at | 0.096660157 | 1.825138031 | 0.073080967 | 0.171181057 |
| 212954_at   | 0.077683794 | 2.110107734 | 0.039131217 | 0.10496683  |
| 212955_s_at | -0.02955527 | -0.49706691 | 0.62100278  | 0.767274584 |
| 212956_at   | -0.71184705 | -6.31445824 | 3.97E-08    | 1.24E-06    |
| 212957_s_at | -0.19220909 | -3.79499332 | 0.000352363 | 0.002128083 |
| 212958_x_at | -0.5811234  | -6.05073622 | 1.09E-07    | 2.69E-06    |
| 212959_s_at | -0.35860528 | -4.46292796 | 3.73E-05    | 0.000323116 |
| 212960_at   | -0.12035741 | -3.10616884 | 0.002920712 | 0.012546374 |
| 212961_x_at | -0.26724268 | -3.844938   | 0.000299708 | 0.001861388 |
| 212962_at   | -0.02630349 | -0.65887062 | 0.512561041 | 0.683342315 |
| 212963_at   | 0.019371491 | 0.440429807 | 0.661247182 | 0.795421939 |
| 212964_at   | -0.1259795  | -2.69111456 | 0.009266894 | 0.032830444 |
| 212965_at   | -0.0837683  | -2.04516813 | 0.045339727 | 0.11816673  |
| 212966_at   | -0.23327173 | -3.2910372  | 0.001693994 | 0.00793086  |
| 212967_x_at | -0.01187338 | -0.23485043 | 0.815143999 | 0.896453869 |
| 212968_at   | 0.061899562 | 1.869057151 | 0.066617809 | 0.159622729 |
| 212969_x_at | 0.32615427  | 6.45452822  | 2.31E-08    | 8.20E-07    |
| 212970_at   | 0.134333172 | 3.401581571 | 0.001212877 | 0.005988279 |
| 212971_at   | -0.03465443 | -0.57164012 | 0.569753302 | 0.728525251 |
| 212972_x_at | 0.011467749 | 0.302389531 | 0.763426475 | 0.863938825 |
| 212973_at   | 0.14172812  | 4.499054232 | 3.29E-05    | 0.000289885 |
| 212974_at   | 0.040546913 | 0.599267172 | 0.551305988 | 0.713986706 |
| 212975_at   | 0.09925766  | 1.757614237 | 0.08403877  | 0.190673606 |
| 212976_at   | -0.37799362 | -3.91966295 | 0.000234793 | 0.001512016 |
| 212977_at   | 0.777217221 | 4.604044277 | 2.28E-05    | 0.000213007 |
| 212978_at   | -0.37017397 | -3.70409714 | 0.000471765 | 0.002726865 |
| 212979_s_at | -0.93609338 | -6.40638286 | 2.79E-08    | 9.41E-07    |
| 212980_at   | 0.354895232 | 3.262988165 | 0.001842055 | 0.008518792 |
| 212981_s_at | -0.54298169 | -3.44661908 | 0.001056699 | 0.005333987 |
| 212982_at   | 0.093313026 | 1.475062182 | 0.145551759 | 0.287921003 |
| 212983_at   | -0.50406385 | -7.47387707 | 4.44E-10    | 5.42E-08    |
| 212984_at   | -0.03483226 | -0.547925   | 0.585825784 | 0.740978263 |
| 212985_at   | 0.092118896 | 1.287516199 | 0.202979147 | 0.365729078 |
| 212986_s_at | -0.02267486 | -0.58260518 | 0.562395575 | 0.723338984 |
| 212987_at   | -0.27211738 | -3.72042131 | 0.000447796 | 0.002608564 |
| 212988_x_at | -0.07030104 | -1.01681828 | 0.313422157 | 0.494505305 |
| 212989_at   | 0.181780395 | 2.872115583 | 0.005669055 | 0.021843943 |
| 212990_at   | -0.73439378 | -5.13543229 | 3.37E-06    | 4.35E-05    |
| 212991_at   | -0.07558793 | -1.24919007 | 0.216565304 | 0.382664633 |

|             |             |             |             |             |
|-------------|-------------|-------------|-------------|-------------|
| 212992_at   | 0.320844481 | 3.538990766 | 0.000794042 | 0.004205833 |
| 212993_at   | 0.72988171  | 6.921079126 | 3.80E-09    | 2.28E-07    |
| 212994_at   | 0.020817004 | 0.631452587 | 0.530201613 | 0.697476934 |
| 212995_x_at | -0.09120577 | -2.01190403 | 0.048837706 | 0.125180933 |
| 212996_s_at | -0.09867955 | -2.22927938 | 0.02964469  | 0.084301381 |
| 212997_s_at | 0.025093508 | 0.680174245 | 0.499074147 | 0.671927152 |
| 212998_x_at | 0.266255035 | 2.520523944 | 0.014463352 | 0.047123725 |
| 212999_x_at | 0.097899699 | 2.115775303 | 0.038626267 | 0.103942988 |
| 213000_at   | 0.21887464  | 3.969439995 | 0.000199305 | 0.00131338  |
| 213001_at   | 0.062946647 | 1.046927707 | 0.299434513 | 0.478760207 |
| 213002_at   | 0.236034237 | 3.893997194 | 0.000255394 | 0.001622469 |
| 213003_s_at | 0.028048851 | 0.781154193 | 0.437858116 | 0.618286096 |
| 213004_at   | 0.038119334 | 1.005288388 | 0.318893513 | 0.500323491 |
| 213005_s_at | 0.56834662  | 6.593380629 | 1.35E-08    | 5.60E-07    |
| 213006_at   | 0.080602589 | 1.829055435 | 0.072483855 | 0.170079884 |
| 213007_at   | -0.02068726 | -0.85594867 | 0.395514658 | 0.578149444 |
| 213008_at   | 0.009015735 | 0.236258176 | 0.814056668 | 0.895795061 |
| 213009_s_at | -0.47579373 | -5.52503555 | 7.96E-07    | 1.33E-05    |
| 213010_at   | -0.01659738 | -0.34385889 | 0.732183911 | 0.843685953 |
| 213011_s_at | -0.3374808  | -5.49199589 | 9.00E-07    | 1.47E-05    |
| 213012_at   | 0.040897391 | 1.489031291 | 0.141844654 | 0.282664701 |
| 213013_at   | 0.025302502 | 0.605161197 | 0.547409717 | 0.710939064 |
| 213014_at   | -0.3334619  | -3.36086696 | 0.001372665 | 0.006644334 |
| 213015_at   | 0.520607696 | 6.494257359 | 1.99E-08    | 7.36E-07    |
| 213016_at   | 0.471942324 | 4.866669608 | 8.94E-06    | 9.73E-05    |
| 213017_at   | 0.190302201 | 3.76565756  | 0.000387314 | 0.002307669 |
| 213018_at   | 0.183476242 | 3.481003304 | 0.000950517 | 0.004886748 |
| 213019_at   | -0.16789249 | -2.46153245 | 0.016799789 | 0.053427466 |
| 213020_at   | -0.00133712 | -0.05204605 | 0.958669118 | 0.978907883 |
| 213021_at   | 0.058270512 | 1.031636439 | 0.30648398  | 0.486637369 |
| 213022_s_at | -0.33377732 | -4.29047492 | 6.77E-05    | 0.000529977 |
| 213023_at   | -0.34448149 | -6.66848735 | 1.01E-08    | 4.52E-07    |
| 213024_at   | 0.023753821 | 0.580958679 | 0.563497392 | 0.724208631 |
| 213025_at   | 0.032814424 | 0.616678725 | 0.539836552 | 0.705552717 |
| 213026_at   | 0.117598741 | 1.812020509 | 0.075110541 | 0.174771714 |
| 213027_at   | 0.32657639  | 5.546077466 | 7.36E-07    | 1.24E-05    |
| 213028_at   | -0.0814573  | -2.12425676 | 0.037881226 | 0.102429338 |
| 213029_at   | 0.569347488 | 7.048917391 | 2.32E-09    | 1.61E-07    |
| 213030_s_at | -0.29713799 | -3.91644679 | 0.000237284 | 0.001525859 |
| 213031_s_at | 0.149884508 | 3.804831117 | 0.000341335 | 0.00207263  |
| 213032_at   | 0.5032237   | 5.855718777 | 2.29E-07    | 4.79E-06    |
| 213033_s_at | 0.066312502 | 2.128776733 | 0.037489321 | 0.101599219 |
| 213034_at   | -0.10914988 | -1.90654766 | 0.061489137 | 0.149911961 |
| 213035_at   | -0.09970367 | -2.46995713 | 0.016446532 | 0.052460809 |
| 213036_x_at | 0.040485106 | 1.12322837  | 0.265923858 | 0.441150216 |
| 213037_x_at | 0.060446402 | 1.244850716 | 0.218144913 | 0.384661113 |
| 213038_at   | -0.10422055 | -2.18245634 | 0.033098918 | 0.092159794 |
| 213039_at   | 0.212891596 | 4.228248949 | 8.37E-05    | 0.00063384  |
| 213040_s_at | 0.02474655  | 0.365933177 | 0.715733444 | 0.833421721 |
| 213041_s_at | -0.22469123 | -3.46565463 | 0.000996599 | 0.005079255 |
| 213042_s_at | -0.0030875  | -0.07402703 | 0.941241142 | 0.969440199 |
| 213043_s_at | -0.00418508 | -0.08791944 | 0.93024064  | 0.963662201 |
| 213044_at   | 0.383898409 | 6.392214324 | 2.94E-08    | 9.82E-07    |
| 213045_at   | -0.64376136 | -6.42353708 | 2.61E-08    | 8.95E-07    |
| 213046_at   | 0.15344357  | 3.655826454 | 0.000550033 | 0.003104579 |
| 213047_x_at | -0.11252049 | -1.45965026 | 0.149729584 | 0.293818423 |
| 213048_s_at | 0.084342991 | 1.58863524  | 0.117527256 | 0.245858834 |
| 213049_at   | 0.061283812 | 1.092773715 | 0.278967861 | 0.455871573 |
| 213050_at   | 0.300978598 | 4.158283353 | 0.000106095 | 0.000774138 |
| 213051_at   | 0.519806053 | 6.55525682  | 1.57E-08    | 6.22E-07    |
| 213052_at   | 0.237074065 | 6.735930566 | 7.80E-09    | 3.73E-07    |
| 213053_at   | 0.029485353 | 0.549047612 | 0.585060107 | 0.74049181  |
| 213054_at   | 0.042813991 | 2.158852376 | 0.034970615 | 0.096168904 |
| 213055_at   | -0.18148027 | -2.61859231 | 0.011222017 | 0.03829676  |
| 213056_at   | 0.399204228 | 3.761931176 | 0.000391984 | 0.002330835 |
| 213057_at   | 0.155155464 | 2.828379691 | 0.006395042 | 0.024144299 |
| 213058_at   | 0.11828583  | 3.392703741 | 0.00124614  | 0.006128808 |
| 213059_at   | -0.03861169 | -0.71563864 | 0.477058076 | 0.652707164 |
| 213060_s_at | 0.582366759 | 2.911629101 | 0.005079492 | 0.019960667 |
| 213061_s_at | -0.24662781 | -5.41724986 | 1.19E-06    | 1.83E-05    |
| 213062_at   | -0.09796405 | -2.18459517 | 0.032933744 | 0.091774217 |
| 213063_at   | 0.050206938 | 1.297744235 | 0.199463373 | 0.361039126 |
| 213064_at   | 0.131962032 | 2.099501568 | 0.040091632 | 0.107048346 |
| 213065_at   | 0.077706065 | 1.85982804  | 0.067934386 | 0.16203029  |
| 213066_at   | -0.07771729 | -1.88493613 | 0.064403045 | 0.155499779 |

|             |             |             |             |              |
|-------------|-------------|-------------|-------------|--------------|
| 213067_at   | -0.26091357 | -3.8672425  | 0.000278715 | 0.001748746  |
| 213068_at   | -0.00655485 | -0.25246026 | 0.801569273 | 0.888044967  |
| 213069_at   | 0.454131007 | 5.077481726 | 4.16E-06    | 5.18E-05     |
| 213070_at   | -0.01729823 | -0.18976909 | 0.850146268 | 0.917783892  |
| 213071_at   | -0.03809923 | -0.78011538 | 0.438464476 | 0.61892721   |
| 213072_at   | -0.04532112 | -1.25808754 | 0.213352893 | 0.378665163  |
| 213073_at   | 0.243140123 | 5.633082872 | 5.31E-07    | 9.52E-06     |
| 213074_at   | 0.312242453 | 7.256144669 | 1.03E-09    | 9.57E-08     |
| 213075_at   | 0.115605788 | 2.16383895  | 0.034567651 | 0.095322853  |
| 213076_at   | 0.002483189 | 0.042356966 | 0.966358211 | 0.982906031  |
| 213077_at   | -0.04836638 | -0.57365993 | 0.568394445 | 0.727682962  |
| 213078_x_at | -0.63017905 | -8.20955836 | 2.55E-11    | 9.91E-09     |
| 213079_at   | -0.07843233 | -1.88474753 | 0.064428981 | 0.155523754  |
| 213080_x_at | 0.194066043 | 4.038793776 | 0.000158361 | 0.001082181  |
| 213081_at   | -0.02441172 | -0.76036087 | 0.450089218 | 0.629510776  |
| 213082_s_at | 0.124939375 | 2.982590326 | 0.004161126 | 0.016949421  |
| 213083_at   | 0.262969185 | 4.543493427 | 2.82E-05    | 0.000254312  |
| 213084_x_at | -0.08017705 | -1.93493875 | 0.057831935 | 0.142891688  |
| 213085_s_at | 0.075336491 | 1.340070345 | 0.185398573 | 0.343030244  |
| 213086_s_at | 0.152585981 | 1.882397607 | 0.06475287  | 0.156150675  |
| 213087_s_at | -0.16686901 | -3.9102294  | 0.000242172 | 0.001552605  |
| 213088_s_at | 0.033575114 | 0.910239672 | 0.366427207 | 0.549588939  |
| 213089_at   | 0.728611286 | 5.988742803 | 1.38E-07    | 3.25E-06     |
| 213090_s_at | 0.193593577 | 4.395794102 | 4.71E-05    | 0.000391541  |
| 213091_at   | -0.24761059 | -4.36025445 | 5.33E-05    | 0.000435041  |
| 213092_x_at | -0.00679812 | -0.13595285 | 0.892324789 | 0.942363828  |
| 213093_at   | 0.358791694 | 5.583179107 | 6.40E-07    | 1.10E-05     |
| 213094_at   | 0.058745702 | 1.994326114 | 0.050778293 | 0.129057596  |
| 213095_x_at | -0.02678272 | -0.46686928 | 0.64232561  | 0.782628575  |
| 213096_at   | 0.047272053 | 1.011831625 | 0.315780683 | 0.49708958   |
| 213097_s_at | -0.02083319 | -0.57609443 | 0.566758715 | 0.726789833  |
| 213098_at   | -0.03404489 | -0.90538444 | 0.368971417 | 0.552239736  |
| 213099_at   | 0.039856422 | 1.101557992 | 0.275160458 | 0.451531897  |
| 213100_at   | 0.165771759 | 2.827385267 | 0.006412505 | 0.024205041  |
| 213101_s_at | -0.33163493 | -4.55118555 | 2.74E-05    | 0.000248953  |
| 213102_at   | -0.16906264 | -2.59974823 | 0.011788148 | 0.039875238  |
| 213103_at   | 0.019963581 | 0.451434119 | 0.653343969 | 0.789958842  |
| 213104_at   | -0.03217117 | -0.71320011 | 0.478554242 | 0.654073403  |
| 213105_s_at | -0.00783014 | -0.15723588 | 0.875599781 | 0.933232505  |
| 213106_at   | -0.39704287 | -4.43983399 | 4.05E-05    | 0.000345375  |
| 213107_at   | 0.176636485 | 2.575022608 | 0.012570368 | 0.042044223  |
| 213108_at   | -0.44334852 | -4.84918055 | 9.52E-06    | 0.000102444  |
| 213109_at   | 0.155603157 | 1.953558879 | 0.055535432 | 0.138534802  |
| 213110_s_at | 0.504017279 | 3.962928795 | 0.000203635 | 0.001336199  |
| 213111_at   | 0.217032553 | 3.114075159 | 0.002854508 | 0.012320007  |
| 213112_s_at | 0.047698655 | 1.486524133 | 0.142504467 | 0.283574943  |
| 213113_s_at | 0.232281048 | 7.247273007 | 1.07E-09    | 9.75E-08     |
| 213114_at   | -0.0324194  | -0.81864963 | 0.416305003 | 0.598594144  |
| 213115_at   | 0.09048493  | 3.562333669 | 0.00073825  | 0.003969909  |
| 213116_at   | 0.340345692 | 3.229890907 | 0.002032438 | 0.0092229193 |
| 213117_at   | -0.01880758 | -0.68815501 | 0.494071926 | 0.667614671  |
| 213118_at   | -0.26686624 | -3.5950756  | 0.000666253 | 0.003644576  |
| 213119_at   | -0.02726139 | -0.61749541 | 0.539301602 | 0.705162879  |
| 213120_at   | -0.00530211 | -0.29496982 | 0.769060062 | 0.867753094  |
| 213121_at   | -0.00415474 | -0.07270821 | 0.942286064 | 0.970091653  |
| 213122_at   | -0.6025445  | -5.91569632 | 1.82E-07    | 4.02E-06     |
| 213123_at   | 0.175875361 | 3.548970239 | 0.000769716 | 0.004104537  |
| 213124_at   | 0.064125098 | 1.413603738 | 0.16277177  | 0.31224122   |
| 213125_at   | 0.024735403 | 0.497820637 | 0.620474619 | 0.767113959  |
| 213126_at   | -0.03325722 | -1.19042485 | 0.23868237  | 0.408360481  |
| 213127_s_at | -0.00077717 | -0.02014396 | 0.983997005 | 0.992170969  |
| 213128_s_at | -0.16775853 | -2.21906477 | 0.030369889 | 0.085931691  |
| 213129_s_at | 0.156170939 | 1.660269024 | 0.102205804 | 0.22131798   |
| 213130_at   | 0.045348977 | 0.951291207 | 0.345366068 | 0.528346008  |
| 213131_at   | -0.31199839 | -3.27869637 | 0.001757698 | 0.008182818  |
| 213132_s_at | -0.10608163 | -2.13673342 | 0.036808028 | 0.100123212  |
| 213133_s_at | 0.015149028 | 0.295753527 | 0.768464417 | 0.867402967  |
| 213134_x_at | -0.067135   | -0.91621284 | 0.363312618 | 0.54637484   |
| 213135_at   | -0.29333463 | -3.75783475 | 0.000397181 | 0.002357665  |
| 213136_at   | 0.212892006 | 4.221216347 | 8.57E-05    | 0.000647338  |
| 213137_s_at | 0.090876413 | 2.918043712 | 0.004989325 | 0.019687704  |
| 213138_at   | 0.065006807 | 1.195153366 | 0.236844363 | 0.40619549   |
| 213139_at   | 0.058359225 | 2.140415539 | 0.036496423 | 0.099498092  |
| 213140_s_at | -0.17073266 | -2.69950699 | 0.009062008 | 0.032227204  |
| 213141_at   | 0.034863086 | 0.89006872  | 0.377070703 | 0.559738396  |

|             |             |             |             |             |
|-------------|-------------|-------------|-------------|-------------|
| 213142_x_at | 0.252138121 | 2.647171135 | 0.010410571 | 0.036025493 |
| 213143_at   | 0.149790951 | 3.245185246 | 0.001942268 | 0.008891103 |
| 213144_at   | -0.04496722 | -1.23582997 | 0.221455787 | 0.388464637 |
| 213145_at   | -0.24721918 | -3.68311316 | 0.000504383 | 0.002886654 |
| 213146_at   | 0.094378609 | 2.27302968  | 0.026708617 | 0.077621375 |
| 213147_at   | 0.14940266  | 3.475229385 | 0.000967609 | 0.004960927 |
| 213148_at   | 0.111597328 | 2.814255391 | 0.00664724  | 0.024939426 |
| 213149_at   | -0.27933295 | -6.0982011  | 9.09E-08    | 2.34E-06    |
| 213150_at   | 0.05153791  | 1.301214959 | 0.198280778 | 0.359451772 |
| 213151_s_at | 0.237112695 | 4.35984057  | 5.34E-05    | 0.000435503 |
| 213152_s_at | -0.10455244 | -2.25485497 | 0.027895527 | 0.080303182 |
| 213153_at   | 0.017907123 | 0.532731477 | 0.596235104 | 0.748881049 |
| 213154_s_at | 0.178134291 | 2.832685501 | 0.006319934 | 0.023920266 |
| 213155_at   | 0.270222341 | 3.67173725  | 0.000522956 | 0.002976006 |
| 213156_at   | 0.732533553 | 7.138710704 | 1.63E-09    | 1.27E-07    |
| 213157_s_at | 0.077046954 | 1.432840213 | 0.157220072 | 0.304413806 |
| 213158_at   | 0.724919595 | 7.665468014 | 2.11E-10    | 3.39E-08    |
| 213159_at   | 0.054873257 | 1.558231683 | 0.124566188 | 0.256904111 |
| 213160_at   | 0.060919487 | 1.25425024  | 0.214733989 | 0.380436512 |
| 213161_at   | 0.150979941 | 3.530655826 | 0.000814918 | 0.004296201 |
| 213162_at   | 0.055148922 | 1.276102322 | 0.20695697  | 0.370654842 |
| 213164_at   | 0.53772197  | 3.482933177 | 0.000944868 | 0.004862741 |
| 213165_at   | 0.429817683 | 6.265935304 | 4.78E-08    | 1.42E-06    |
| 213166_x_at | -0.1524553  | -2.53784565 | 0.013835438 | 0.045465689 |
| 213167_s_at | -0.0304739  | -0.99727294 | 0.322734713 | 0.504694348 |
| 213168_at   | 0.414062517 | 4.016201177 | 0.000170715 | 0.001152855 |
| 213169_at   | 0.050258607 | 0.98276187  | 0.329767212 | 0.512232595 |
| 213170_at   | 0.015921975 | 0.453426273 | 0.65191744  | 0.789023838 |
| 213171_s_at | -0.0882651  | -2.26621253 | 0.02714847  | 0.078598135 |
| 213172_at   | -0.33108599 | -4.35515014 | 5.42E-05    | 0.000441147 |
| 213173_at   | -0.02196144 | -0.69261237 | 0.491290136 | 0.66542223  |
| 213174_at   | -0.18196264 | -3.33016697 | 0.001506106 | 0.007186728 |
| 213175_s_at | -0.06047287 | -1.2078678  | 0.231953127 | 0.400347385 |
| 213176_s_at | -0.00057423 | -0.01214488 | 0.990351303 | 0.995408013 |
| 213177_at   | -0.17199566 | -3.25557718 | 0.001883165 | 0.008673853 |
| 213178_s_at | -0.19938524 | -3.25574402 | 0.00188223  | 0.008671334 |
| 213179_at   | 0.091729394 | 2.023584659 | 0.047583783 | 0.122711259 |
| 213180_s_at | 0.041449784 | 0.857986867 | 0.394397418 | 0.577018933 |
| 213181_s_at | 0.143950659 | 3.478962421 | 0.000956525 | 0.004914247 |
| 213182_x_at | 0.331174035 | 3.268784692 | 0.001810491 | 0.008391007 |
| 213183_s_at | 0.218882393 | 4.482914117 | 3.48E-05    | 0.000304873 |
| 213184_at   | -0.03125809 | -0.88118713 | 0.381818605 | 0.564573602 |
| 213185_at   | 0.278543928 | 5.302207696 | 1.82E-06    | 2.63E-05    |
| 213186_at   | -0.10785892 | -1.42107577 | 0.160597564 | 0.309185247 |
| 213187_x_at | 0.149706749 | 2.240115651 | 0.028892095 | 0.082650293 |
| 213188_s_at | 0.199054826 | 3.651068026 | 0.000558387 | 0.00314419  |
| 213189_at   | 0.053034626 | 0.840689767 | 0.403941014 | 0.586276315 |
| 213190_at   | 0.093934653 | 1.886287247 | 0.064217506 | 0.155169159 |
| 213191_at   | -0.08734343 | -1.82239971 | 0.073500803 | 0.171939172 |
| 213192_at   | -0.04076743 | -1.09488035 | 0.278051442 | 0.454773104 |
| 213193_x_at | 0.039147703 | 0.767459882 | 0.445891241 | 0.625898459 |
| 213194_at   | -0.05905762 | -0.85759575 | 0.39461166  | 0.577244838 |
| 213195_at   | -0.37951808 | -4.41878793 | 4.35E-05    | 0.000366493 |
| 213196_at   | 0.032436726 | 0.997477474 | 0.322636312 | 0.50457578  |
| 213197_at   | -0.30199456 | -4.0116948  | 0.000173288 | 0.001167408 |
| 213198_at   | -0.25608343 | -5.38567518 | 1.34E-06    | 2.02E-05    |
| 213199_at   | 0.067140211 | 1.962162885 | 0.054500867 | 0.136525574 |
| 213200_at   | -0.43057477 | -6.07482716 | 9.94E-08    | 2.51E-06    |
| 213201_s_at | -0.11272717 | -1.9909399  | 0.051159644 | 0.129777886 |
| 213202_at   | 0.010523917 | 0.201452449 | 0.841042868 | 0.912615336 |
| 213203_at   | -0.40532641 | -6.13421567 | 7.92E-08    | 2.10E-06    |
| 213204_at   | -0.06793633 | -1.5351143  | 0.130140801 | 0.265436644 |
| 213205_s_at | 0.072450004 | 2.308080492 | 0.024545305 | 0.072647601 |
| 213206_at   | 0.076155576 | 2.831470529 | 0.006341045 | 0.023985947 |
| 213207_s_at | 0.049101346 | 1.707469631 | 0.093031421 | 0.206115421 |
| 213208_at   | 0.021543183 | 0.485681358 | 0.629005231 | 0.773164877 |
| 213209_at   | 0.020418169 | 0.553140814 | 0.582272396 | 0.738134106 |
| 213210_at   | -0.01842367 | -0.59132437 | 0.556578641 | 0.718774024 |
| 213211_s_at | -0.01607834 | -0.78603912 | 0.435013394 | 0.61568983  |
| 213212_x_at | 0.14340237  | 2.588855351 | 0.012127133 | 0.040836785 |
| 213213_at   | 0.16730151  | 3.30124756  | 0.001642941 | 0.007739858 |
| 213214_x_at | -0.06271895 | -0.8858896  | 0.379300098 | 0.561927934 |
| 213215_at   | 0.063606855 | 1.812471183 | 0.075040037 | 0.174689516 |
| 213216_at   | -0.29828776 | -5.42442786 | 1.16E-06    | 1.80E-05    |
| 213217_at   | 0.71144007  | 8.147233014 | 3.25E-11    | 1.14E-08    |



|             |             |             |             |             |
|-------------|-------------|-------------|-------------|-------------|
| 213218_at   | 0.083865786 | 1.815755958 | 0.074527831 | 0.173777735 |
| 213219_at   | 0.061058414 | 1.218203921 | 0.22803136  | 0.395561745 |
| 213220_at   | -0.02660864 | -0.41237063 | 0.681573398 | 0.809569934 |
| 213221_s_at | 0.026105948 | 0.526434475 | 0.600574476 | 0.752098029 |
| 213222_at   | -1.00100757 | -8.10967102 | 3.75E-11    | 1.23E-08    |
| 213223_at   | 0.047051247 | 1.056299217 | 0.295169386 | 0.47402746  |
| 213224_s_at | 0.020698243 | 0.283925326 | 0.777468979 | 0.872461297 |
| 213225_at   | 0.173313354 | 2.021887149 | 0.047764271 | 0.123064728 |
| 213226_at   | 0.127201446 | 4.361540452 | 5.30E-05    | 0.000433355 |
| 213227_at   | -0.10811294 | -1.52633774 | 0.132308536 | 0.268646951 |
| 213228_at   | -0.25979376 | -3.60023529 | 0.000655537 | 0.003593872 |
| 213229_at   | 0.496238257 | 6.622274825 | 1.21E-08    | 5.17E-07    |
| 213230_at   | 0.213746797 | 3.735514924 | 0.000426675 | 0.002502486 |
| 213231_at   | 0.027509383 | 0.556535854 | 0.579965011 | 0.736525241 |
| 213232_at   | 0.007970099 | 0.184974433 | 0.853888168 | 0.919986741 |
| 213233_s_at | 0.176158643 | 3.221671443 | 0.00208251  | 0.00942783  |
| 213234_at   | -0.33531429 | -4.88085514 | 8.49E-06    | 9.33E-05    |
| 213235_at   | 0.020953367 | 0.290976417 | 0.772097352 | 0.869543213 |
| 213236_at   | 0.400403266 | 5.909736042 | 1.86E-07    | 4.09E-06    |
| 213237_at   | 0.086816266 | 0.975191813 | 0.333476001 | 0.516110034 |
| 213238_at   | 0.097430121 | 1.793698465 | 0.078024207 | 0.180044426 |
| 213239_at   | 0.070138383 | 1.916600859 | 0.060172272 | 0.147370625 |
| 213240_s_at | -0.05536575 | -1.33372247 | 0.187458663 | 0.345437783 |
| 213241_at   | 0.01318771  | 0.182213694 | 0.856044269 | 0.921199357 |
| 213242_x_at | -0.37462729 | -5.11181099 | 3.67E-06    | 4.68E-05    |
| 213243_at   | 0.092651408 | 2.08086877  | 0.041828592 | 0.1107729   |
| 213244_at   | 0.110087834 | 1.847185887 | 0.06977342  | 0.165313771 |
| 213245_at   | -0.5215043  | -4.69932705 | 1.63E-05    | 0.000160696 |
| 213246_at   | -0.06589047 | -1.01528806 | 0.314144634 | 0.495246817 |
| 213247_at   | 0.1683157   | 3.234699504 | 0.002003672 | 0.009123598 |
| 213248_at   | 0.004989174 | 0.120640104 | 0.904389037 | 0.949334321 |
| 213249_at   | 0.34136019  | 6.741778797 | 7.63E-09    | 3.68E-07    |
| 213250_at   | -0.03435984 | -0.70623922 | 0.482839538 | 0.65793843  |
| 213251_at   | 0.198316519 | 2.278203235 | 0.026379036 | 0.076933692 |
| 213252_at   | 0.094600017 | 1.476267597 | 0.145228897 | 0.287435005 |
| 213253_at   | 0.077491349 | 1.848463463 | 0.069585688 | 0.165008944 |
| 213254_at   | 0.06721484  | 1.690692624 | 0.096211552 | 0.211358961 |
| 213256_at   | 0.505694559 | 4.863523143 | 9.04E-06    | 9.82E-05    |
| 213257_at   | -0.02101804 | -0.51322    | 0.609728068 | 0.758904025 |
| 213258_at   | 0.017330861 | 0.590211698 | 0.557319273 | 0.719356331 |
| 213259_s_at | -0.06722721 | -1.97261669 | 0.053266109 | 0.134010862 |
| 213260_at   | 0.140921835 | 2.814634205 | 0.006640358 | 0.024921974 |
| 213261_at   | -0.39793034 | -7.27419753 | 9.65E-10    | 9.15E-08    |
| 213262_at   | -0.68462973 | -6.22714521 | 5.55E-08    | 1.59E-06    |
| 213263_s_at | 0.050115585 | 1.13891561  | 0.259375522 | 0.433459628 |
| 213264_at   | 0.068329882 | 2.266243028 | 0.027146487 | 0.078597487 |
| 213265_at   | -0.02491648 | -0.44264014 | 0.65965659  | 0.7942394   |
| 213266_at   | -0.06183042 | -1.42474478 | 0.159538233 | 0.307715796 |
| 213267_at   | 0.063761771 | 1.976947013 | 0.052761694 | 0.13297315  |
| 213268_at   | -0.91545255 | -7.49076053 | 4.15E-10    | 5.17E-08    |
| 213269_at   | 0.034726041 | 0.608855539 | 0.5449747   | 0.709260608 |
| 213270_at   | -0.00893851 | -0.17297029 | 0.863271183 | 0.925766424 |
| 213271_s_at | -0.25636806 | -3.4970809  | 0.000904421 | 0.004688594 |
| 213272_s_at | -0.20622117 | -3.83807183 | 0.000306471 | 0.001896799 |
| 213273_at   | 0.092250709 | 1.83531382  | 0.071538422 | 0.168440189 |
| 213274_s_at | -0.0772635  | -0.93941054 | 0.351378388 | 0.534597547 |
| 213275_x_at | 0.08888793  | 1.465898838 | 0.148024561 | 0.291483683 |
| 213276_at   | -0.65921096 | -8.07068628 | 4.37E-11    | 1.36E-08    |
| 213277_at   | 0.058845764 | 1.57080906  | 0.121614435 | 0.252089779 |
| 213278_at   | -0.08264928 | -1.11669937 | 0.268683389 | 0.444148787 |
| 213279_at   | 0.056180368 | 1.567417015 | 0.122404927 | 0.253393903 |
| 213280_at   | -0.43532466 | -5.23198646 | 2.36E-06    | 3.25E-05    |
| 213281_at   | 0.102802344 | 2.092502794 | 0.040736563 | 0.108485191 |
| 213282_at   | -0.05340065 | -1.70044434 | 0.094352398 | 0.208308916 |
| 213283_s_at | 0.207323965 | 3.495507775 | 0.000908835 | 0.004707539 |
| 213284_at   | 0.019174662 | 0.607275022 | 0.546015776 | 0.710090118 |
| 213285_at   | -0.14859238 | -4.19614903 | 9.33E-05    | 0.000694826 |
| 213286_at   | -0.10099757 | -2.18990041 | 0.03252716  | 0.090826399 |
| 213287_s_at | -0.10910066 | -2.12970858 | 0.037408966 | 0.10141835  |
| 213288_at   | 0.176742285 | 4.963371456 | 6.31E-06    | 7.30E-05    |
| 213289_at   | -0.18823654 | -2.92801108 | 0.00485216  | 0.019250134 |
| 213290_at   | 0.006567277 | 0.156685638 | 0.876031495 | 0.933492277 |
| 213291_s_at | -0.10669653 | -1.80573205 | 0.076100124 | 0.176532064 |
| 213292_s_at | 0.002940761 | 0.059106469 | 0.953068527 | 0.975875063 |
| 213293_s_at | 0.29212959  | 2.638972381 | 0.010637705 | 0.036645021 |

|             |             |             |             |             |
|-------------|-------------|-------------|-------------|-------------|
| 213294_at   | 0.023727038 | 0.358507799 | 0.721252432 | 0.837056628 |
| 213295_at   | -0.38230159 | -6.09690251 | 9.14E-08    | 2.35E-06    |
| 213296_at   | 0.139065635 | 3.438824685 | 0.001082287 | 0.005439062 |
| 213297_at   | -0.04909206 | -0.93177817 | 0.355276496 | 0.538402128 |
| 213298_at   | 0.115230992 | 2.879493592 | 0.005554376 | 0.021490449 |
| 213299_at   | -0.10987708 | -1.90595172 | 0.061567961 | 0.150057006 |
| 213300_at   | 0.118305938 | 3.296246092 | 0.001667765 | 0.00782774  |
| 213301_x_at | -0.00384806 | -0.08801155 | 0.930167753 | 0.963615135 |
| 213302_at   | -0.05858021 | -2.35063884 | 0.022128937 | 0.066845993 |
| 213303_x_at | -0.00429034 | -0.18366684 | 0.854909242 | 0.92068603  |
| 213304_at   | -0.33135412 | -4.40805728 | 4.52E-05    | 0.000377708 |
| 213305_s_at | -0.1320298  | -2.94023012 | 0.004688784 | 0.018709924 |
| 213306_at   | 0.293455127 | 3.834911089 | 0.000309633 | 0.001911779 |
| 213307_at   | -0.31814734 | -3.8021291  | 0.000344331 | 0.002087753 |
| 213308_at   | -0.48188667 | -4.88574181 | 8.35E-06    | 9.19E-05    |
| 213309_at   | -0.59688829 | -6.13789301 | 7.81E-08    | 2.08E-06    |
| 213310_at   | 0.24299217  | 5.45820578  | 1.02E-06    | 1.63E-05    |
| 213311_s_at | -0.04680764 | -0.75290665 | 0.454521872 | 0.633663606 |
| 213312_at   | -0.25875027 | -4.66073029 | 1.86E-05    | 0.000179931 |
| 213313_at   | 0.232579092 | 3.363395487 | 0.001362188 | 0.006603633 |
| 213314_at   | -0.04599586 | -1.17319675 | 0.245466336 | 0.416842295 |
| 213315_x_at | -0.25440617 | -3.85509604 | 0.000289965 | 0.001809429 |
| 213316_at   | -0.555084   | -5.42830864 | 1.14E-06    | 1.78E-05    |
| 213317_at   | 0.027822646 | 0.554916366 | 0.581065122 | 0.737168231 |
| 213318_s_at | -0.17162973 | -3.1636271  | 0.002470548 | 0.010885708 |
| 213319_s_at | -0.07602472 | -1.15419326 | 0.253109067 | 0.42604155  |
| 213320_at   | 0.013810238 | 0.269301378 | 0.788644291 | 0.879415421 |
| 213321_at   | 0.034131555 | 1.370304796 | 0.175821677 | 0.330424389 |
| 213322_at   | 0.216715488 | 3.229773875 | 0.002033143 | 0.009231456 |
| 213323_s_at | 0.028275486 | 0.724181388 | 0.471837431 | 0.648103957 |
| 213324_at   | -0.0377927  | -0.99213551 | 0.325212909 | 0.507396517 |
| 213325_at   | 0.008563832 | 0.263721225 | 0.792920456 | 0.882158796 |
| 213326_at   | 0.000577673 | 0.008201729 | 0.993483915 | 0.997070502 |
| 213327_s_at | 0.053139404 | 1.235633789 | 0.221528199 | 0.388530944 |
| 213328_at   | 0.229694125 | 3.716674766 | 0.000453192 | 0.002635587 |
| 213329_at   | 0.165945368 | 3.644832996 | 0.000569518 | 0.003198402 |
| 213330_s_at | 0.127919425 | 1.627426991 | 0.10901515  | 0.232359074 |
| 213331_s_at | 0.285713808 | 3.498113503 | 0.000901534 | 0.00467797  |
| 213332_at   | 0.007447973 | 0.177875885 | 0.859434265 | 0.923446559 |
| 213333_at   | -0.41783327 | -5.42489815 | 1.16E-06    | 1.80E-05    |
| 213334_x_at | 0.32196136  | 4.979866033 | 5.94E-06    | 6.93E-05    |
| 213335_s_at | 0.003734086 | 0.130445164 | 0.896661263 | 0.944627488 |
| 213336_at   | -0.04225751 | -0.8377661  | 0.405568034 | 0.587899508 |
| 213337_s_at | -0.00841218 | -0.17941125 | 0.858234067 | 0.92266717  |
| 213338_at   | -1.02539971 | -6.81421288 | 5.76E-09    | 3.05E-07    |
| 213339_at   | 0.035423411 | 1.047337739 | 0.299247023 | 0.478512574 |
| 213340_s_at | 0.101354516 | 2.658461386 | 0.010105033 | 0.035183402 |
| 213341_at   | -0.21320081 | -2.89838565 | 0.005270446 | 0.02058076  |
| 213342_at   | 0.40550801  | 4.352032492 | 5.48E-05    | 0.000445116 |
| 213343_s_at | -0.13244852 | -2.88503899 | 0.005469599 | 0.021217545 |
| 213344_s_at | 0.032387222 | 0.680606014 | 0.498802816 | 0.671804703 |
| 213345_at   | 0.113910644 | 2.19454426  | 0.03217489  | 0.090114695 |
| 213346_at   | 0.003276296 | 0.099571022 | 0.92102495  | 0.958492189 |
| 213347_x_at | 0.113296472 | 2.544491063 | 0.013601167 | 0.044824375 |
| 213348_at   | 0.662458071 | 5.531072136 | 7.78E-07    | 1.31E-05    |
| 213349_at   | 0.112591014 | 2.150893641 | 0.035622282 | 0.09761073  |
| 213350_at   | -0.02819241 | -0.59846254 | 0.55183898  | 0.714449238 |
| 213351_s_at | 0.077164016 | 1.28628071  | 0.203406948 | 0.366248875 |
| 213352_at   | -0.1299994  | -3.70725256 | 0.000467038 | 0.00270374  |
| 213353_at   | -0.0089923  | -0.21354955 | 0.83164002  | 0.906948483 |
| 213354_s_at | -0.0477665  | -1.05540278 | 0.295575556 | 0.474577429 |
| 213355_at   | -0.02130413 | -0.53973115 | 0.591428777 | 0.745251769 |
| 213356_x_at | -0.046663   | -1.02072762 | 0.311581503 | 0.492543879 |
| 213357_at   | -0.14124651 | -1.50385074 | 0.137993634 | 0.277065973 |
| 213358_at   | -0.19666702 | -4.36631492 | 5.22E-05    | 0.000427454 |
| 213359_at   | 0.204301773 | 3.030947092 | 0.003626532 | 0.015078663 |
| 213360_s_at | -0.03570549 | -1.22592773 | 0.225132554 | 0.392403733 |
| 213361_at   | 0.016716639 | 0.332633226 | 0.740598882 | 0.849407069 |
| 213362_at   | 0.166228351 | 2.186762937 | 0.032767074 | 0.091383843 |
| 213363_at   | 0.045919865 | 1.432614148 | 0.15728445  | 0.304525262 |
| 213364_s_at | 0.184390939 | 2.830119917 | 0.006364588 | 0.02405488  |
| 213365_at   | 0.193757017 | 3.831417743 | 0.000313164 | 0.001930207 |
| 213366_x_at | -0.35167475 | -4.97477563 | 6.05E-06    | 7.04E-05    |
| 213367_at   | 0.109377355 | 3.113355735 | 0.002860473 | 0.012336634 |
| 213368_x_at | -0.13404363 | -2.89548004 | 0.005313222 | 0.020720158 |

|             |             |             |             |             |
|-------------|-------------|-------------|-------------|-------------|
| 213369_at   | -0.53027232 | -4.78092306 | 1.22E-05    | 0.000125427 |
| 213370_s_at | 0.105827388 | 2.805043987 | 0.006816622 | 0.02547228  |
| 213371_at   | 0.107684948 | 1.004878319 | 0.31908928  | 0.500534839 |
| 213372_at   | -0.03216025 | -0.44979052 | 0.65452189  | 0.790634421 |
| 213373_s_at | 0.037842289 | 0.842453797 | 0.402961273 | 0.585206512 |
| 213374_x_at | 0.432212139 | 5.892511862 | 1.99E-07    | 4.32E-06    |
| 213375_s_at | -0.23961923 | -3.27467022 | 0.001778966 | 0.008268046 |
| 213376_at   | 0.192664034 | 1.921212683 | 0.059576241 | 0.146175205 |
| 213377_x_at | -0.06126045 | -0.6558598  | 0.514482727 | 0.685016446 |
| 213378_s_at | 0.076780805 | 1.774079143 | 0.081248219 | 0.185897989 |
| 213379_at   | -0.06237679 | -1.51864222 | 0.134232781 | 0.271478479 |
| 213380_x_at | 0.11207211  | 2.877347985 | 0.005587503 | 0.021596183 |
| 213381_at   | 0.242428386 | 5.682572971 | 4.41E-07    | 8.19E-06    |
| 213382_at   | -0.03758265 | -1.52909339 | 0.131624846 | 0.267560157 |
| 213383_at   | -0.01688184 | -0.44321288 | 0.659244689 | 0.794066434 |
| 213384_x_at | 0.148448963 | 3.043533388 | 0.003498292 | 0.014636365 |
| 213385_at   | -0.00802372 | -0.08396483 | 0.933370741 | 0.965360791 |
| 213386_at   | -0.49365507 | -5.57769663 | 6.53E-07    | 1.12E-05    |
| 213387_at   | 0.26360036  | 4.623169433 | 2.13E-05    | 0.000201476 |
| 213388_at   | 0.816013685 | 6.058040551 | 1.06E-07    | 2.64E-06    |
| 213389_at   | 0.038558239 | 0.750780514 | 0.455790787 | 0.634752656 |
| 213390_at   | 0.216137875 | 5.488156548 | 9.13E-07    | 1.49E-05    |
| 213391_at   | 0.368764086 | 5.237491307 | 2.32E-06    | 3.20E-05    |
| 213392_at   | 0.290398095 | 3.535021489 | 0.000803919 | 0.004246897 |
| 213393_at   | -0.05130427 | -1.2021312  | 0.234150813 | 0.403005395 |
| 213394_at   | 0.041396799 | 0.923988654 | 0.35928361  | 0.542415451 |
| 213395_at   | 0.605750936 | 6.997875929 | 2.82E-09    | 1.84E-07    |
| 213396_s_at | 0.252623253 | 3.185537651 | 0.002316712 | 0.010313628 |
| 213397_x_at | 0.57805273  | 5.86906892  | 2.18E-07    | 4.61E-06    |
| 213398_s_at | 0.203486912 | 4.308703106 | 6.36E-05    | 0.000502837 |
| 213399_x_at | 0.249704875 | 3.841488078 | 0.000303088 | 0.001879506 |
| 213400_s_at | 0.384226807 | 4.578589609 | 2.49E-05    | 0.000230084 |
| 213401_s_at | 0.035998625 | 1.184042562 | 0.241179548 | 0.411373039 |
| 213402_at   | -0.01551652 | -0.3183622  | 0.751342732 | 0.856935291 |
| 213403_at   | -0.01984666 | -0.76823524 | 0.445434123 | 0.625643226 |
| 213404_s_at | -0.1495188  | -1.7286894  | 0.089133617 | 0.199537148 |
| 213405_at   | -0.23337453 | -3.01630408 | 0.003781242 | 0.015642995 |
| 213406_at   | 0.005927661 | 0.145404545 | 0.884890755 | 0.9383907   |
| 213407_at   | -0.19192493 | -4.31056501 | 6.32E-05    | 0.000500264 |
| 213408_s_at | -0.50003363 | -5.92360585 | 1.77E-07    | 3.93E-06    |
| 213409_s_at | -0.13312933 | -4.51092516 | 3.16E-05    | 0.000279598 |
| 213410_at   | -0.03016815 | -0.55046602 | 0.584093371 | 0.739804873 |
| 213411_at   | -0.55818735 | -5.50688514 | 8.52E-07    | 1.40E-05    |
| 213412_at   | -0.04677952 | -1.05277793 | 0.296767062 | 0.475806764 |
| 213413_at   | 0.325066036 | 3.916509515 | 0.000237236 | 0.001525764 |
| 213414_s_at | 0.04927556  | 0.923651606 | 0.359457651 | 0.542585823 |
| 213415_at   | 0.013739182 | 0.3273454   | 0.74457387  | 0.852063691 |
| 213416_at   | 0.022999378 | 0.794831005 | 0.429921126 | 0.610841995 |
| 213417_at   | 0.123499256 | 3.681293863 | 0.00050731  | 0.002901921 |
| 213418_at   | 0.388077773 | 2.133738918 | 0.037063153 | 0.100657901 |
| 213419_at   | -0.06794162 | -1.59685355 | 0.115680571 | 0.242918666 |
| 213420_at   | -0.10244672 | -3.02141117 | 0.003726598 | 0.01544696  |
| 213421_x_at | -0.23658435 | -4.14508317 | 0.000110924 | 0.000803862 |
| 213422_s_at | 0.168338568 | 3.324508616 | 0.001532002 | 0.007290058 |
| 213423_x_at | -0.92382101 | -5.9779141  | 1.44E-07    | 3.35E-06    |
| 213424_at   | 0.008301363 | 0.275669361 | 0.783772375 | 0.876497723 |
| 213425_at   | 0.087756241 | 3.814597573 | 0.000330715 | 0.002019998 |
| 213426_s_at | -0.02830544 | -0.60023917 | 0.550662485 | 0.713546181 |
| 213427_at   | -0.23715996 | -5.07012362 | 4.28E-06    | 5.30E-05    |
| 213428_s_at | 0.360973519 | 5.184078353 | 2.82E-06    | 3.75E-05    |
| 213429_at   | 0.118092241 | 2.599500605 | 0.011795757 | 0.039889174 |
| 213430_at   | 0.09841235  | 2.298566664 | 0.025116539 | 0.073985524 |
| 213431_x_at | 0.082460996 | 2.260844765 | 0.027499306 | 0.079377315 |
| 213432_at   | 0.014113409 | 0.410056978 | 0.683260308 | 0.810604169 |
| 213433_at   | -0.14635263 | -4.07396871 | 0.000140826 | 0.000982795 |
| 213434_at   | 0.135844451 | 2.763224749 | 0.007636772 | 0.027975625 |
| 213435_at   | 0.399675607 | 3.981530355 | 0.000191499 | 0.001270182 |
| 213436_at   | -1.71362863 | -8.11582595 | 3.67E-11    | 1.22E-08    |
| 213437_at   | 0.330729054 | 4.83907775  | 9.87E-06    | 0.000105644 |
| 213438_at   | 0.355204911 | 3.971141919 | 0.000198188 | 0.001307561 |
| 213439_x_at | -0.38036355 | -6.99666109 | 2.84E-09    | 1.84E-07    |
| 213440_at   | -0.01954038 | -0.48062289 | 0.632575095 | 0.775837761 |
| 213441_x_at | 0.002834147 | 0.121833499 | 0.90344796  | 0.948749853 |
| 213442_x_at | -0.010725   | -0.29014459 | 0.772730473 | 0.869895978 |
| 213443_at   | 0.045402325 | 1.312672864 | 0.194414021 | 0.354475509 |

|             |             |             |             |             |
|-------------|-------------|-------------|-------------|-------------|
| 213444_at   | 0.038864453 | 1.270667013 | 0.208871494 | 0.373141655 |
| 213445_at   | 0.035230766 | 1.222190701 | 0.226531703 | 0.394036414 |
| 213446_s_at | 0.249658947 | 5.263426791 | 2.10E-06    | 2.95E-05    |
| 213447_at   | -0.04982197 | -1.24992954 | 0.216296967 | 0.382311413 |
| 213448_at   | -0.18190297 | -3.54374213 | 0.00078237  | 0.004156641 |
| 213449_at   | 0.031709582 | 0.847039296 | 0.40042133  | 0.582805644 |
| 213450_s_at | 0.025686102 | 0.55293693  | 0.582411102 | 0.738268059 |
| 213451_x_at | 0.165063718 | 4.002235876 | 0.000178811 | 0.001198943 |
| 213452_at   | 0.029133987 | 0.634172336 | 0.528437712 | 0.696048871 |
| 213453_x_at | -0.20774275 | -4.26167736 | 7.47E-05    | 0.000577199 |
| 213454_at   | -0.15645756 | -3.40257337 | 0.001209214 | 0.005974812 |
| 213455_at   | 0.301071485 | 5.148789497 | 3.21E-06    | 4.18E-05    |
| 213456_at   | 0.019600976 | 0.609799164 | 0.544353622 | 0.708761896 |
| 213457_at   | 0.227897809 | 2.441054109 | 0.01768712  | 0.055753474 |
| 213458_at   | 0.030003165 | 1.295003977 | 0.200400801 | 0.362354355 |
| 213459_at   | 0.085129722 | 2.722514772 | 0.008521407 | 0.030643436 |
| 213460_x_at | 0.112259323 | 2.831873298 | 0.006334039 | 0.023969358 |
| 213461_at   | -0.17782804 | -2.74269885 | 0.008071677 | 0.029309341 |
| 213462_at   | -0.39007127 | -5.84402762 | 2.39E-07    | 4.96E-06    |
| 213463_s_at | 0.106170554 | 3.055624102 | 0.003379097 | 0.014202822 |
| 213464_at   | 0.134079472 | 2.572082785 | 0.012666443 | 0.042302247 |
| 213465_s_at | -0.91946491 | -7.45253158 | 4.82E-10    | 5.71E-08    |
| 213466_at   | -0.16059504 | -3.65703082 | 0.000547937 | 0.003093532 |
| 213467_at   | -0.08720888 | -1.50635816 | 0.137350302 | 0.27617131  |
| 213468_at   | -0.04609897 | -1.05258862 | 0.296853122 | 0.475864876 |
| 213469_at   | -0.15517339 | -1.81733372 | 0.074282849 | 0.173354034 |
| 213470_s_at | -0.05426847 | -1.19863798 | 0.235496452 | 0.404468851 |
| 213471_at   | -0.14395749 | -3.91240891 | 0.000240448 | 0.001543758 |
| 213472_at   | 0.011291811 | 0.495619683 | 0.622017455 | 0.76774294  |
| 213473_at   | 0.091584753 | 1.979629459 | 0.052451289 | 0.132430542 |
| 213474_at   | 0.189953296 | 3.369073507 | 0.001338935 | 0.006512101 |
| 213475_s_at | 0.054790162 | 1.693495128 | 0.095674204 | 0.210426748 |
| 213476_x_at | -0.31404746 | -3.28035873 | 0.001748987 | 0.008152455 |
| 213477_x_at | 0.015427064 | 0.487039257 | 0.628048441 | 0.772525305 |
| 213478_at   | -0.07563955 | -1.19685582 | 0.236185128 | 0.405360435 |
| 213479_at   | 0.199104114 | 0.990494975 | 0.32600694  | 0.508140137 |
| 213480_at   | -0.07384165 | -1.93756959 | 0.057502629 | 0.142258927 |
| 213481_at   | -0.0195688  | -0.49341144 | 0.623567117 | 0.768948516 |
| 213482_at   | -0.68219856 | -6.68293894 | 9.58E-09    | 4.34E-07    |
| 213483_at   | -0.01787009 | -0.31167809 | 0.75639203  | 0.85978889  |
| 213484_at   | -0.88049375 | -5.90561198 | 1.89E-07    | 4.15E-06    |
| 213485_s_at | 0.172637801 | 3.530406854 | 0.000815549 | 0.004298176 |
| 213486_at   | -0.38229537 | -3.44350986 | 0.001066837 | 0.00537653  |
| 213487_at   | -0.07270754 | -2.30681446 | 0.024620649 | 0.072822371 |
| 213488_at   | 0.216827008 | 4.241120941 | 8.01E-05    | 0.000611371 |
| 213489_at   | -0.29061305 | -4.18533244 | 9.68E-05    | 0.00071669  |
| 213490_s_at | -0.24965949 | -6.01152972 | 1.27E-07    | 3.04E-06    |
| 213491_x_at | 0.237835359 | 3.915460236 | 0.000238054 | 0.001529924 |
| 213492_at   | 0.007005143 | 0.179676282 | 0.858026929 | 0.922521197 |
| 213493_at   | 0.250019062 | 4.525544948 | 3.00E-05    | 0.000268373 |
| 213494_s_at | -0.02988639 | -0.91919593 | 0.361763523 | 0.544998832 |
| 213495_s_at | -0.03439512 | -1.12814968 | 0.263857099 | 0.438678945 |
| 213496_at   | -1.09266877 | -5.94911052 | 1.61E-07    | 3.63E-06    |
| 213497_at   | 0.074685889 | 1.932966166 | 0.058079901 | 0.143298385 |
| 213498_at   | -0.04399469 | -0.95946617 | 0.341268351 | 0.524176552 |
| 213499_at   | 0.050621643 | 1.653036795 | 0.103674721 | 0.223772368 |
| 213500_at   | 0.000238943 | 0.005081667 | 0.995962704 | 0.99802776  |
| 213501_at   | 0.214251671 | 3.256674919 | 0.001877021 | 0.008652691 |
| 213502_x_at | 0.222400338 | 3.451006565 | 0.001042549 | 0.005276141 |
| 213503_x_at | 0.560280892 | 4.509244956 | 3.18E-05    | 0.000280855 |
| 213504_at   | -0.03569778 | -1.13846083 | 0.259563734 | 0.4336575   |
| 213505_s_at | -0.14920439 | -2.81455979 | 0.006641709 | 0.024924953 |
| 213506_at   | 0.330808016 | 4.57592545  | 2.51E-05    | 0.000231913 |
| 213507_s_at | 0.185073272 | 4.006826983 | 0.000176109 | 0.001183205 |
| 213508_at   | 0.311846448 | 4.57409014  | 2.53E-05    | 0.000233077 |
| 213509_x_at | 0.039928774 | 1.374544767 | 0.174509454 | 0.328607758 |
| 213510_x_at | 0.057686624 | 0.766401295 | 0.446515777 | 0.62639427  |
| 213511_s_at | -0.05545761 | -1.0771221  | 0.285842556 | 0.463681011 |
| 213512_at   | 0.092140052 | 2.93619845  | 0.004742117 | 0.018880596 |
| 213513_x_at | -0.23533424 | -3.07989242 | 0.00315121  | 0.013385979 |
| 213514_s_at | -0.06912198 | -2.25850685 | 0.027653361 | 0.079731086 |
| 213515_x_at | -0.11743665 | -1.37679365 | 0.173816502 | 0.327661849 |
| 213516_at   | -0.00812476 | -0.37932575 | 0.70581788  | 0.826635459 |
| 213517_at   | 0.306454506 | 5.546268742 | 7.35E-07    | 1.24E-05    |
| 213518_at   | -0.09417461 | -1.44215759 | 0.154584512 | 0.300678548 |

|             |              |             |             |             |
|-------------|--------------|-------------|-------------|-------------|
| 213519_s_at | 0.318294976  | 7.3073891   | 8.48E-10    | 8.45E-08    |
| 213520_at   | -0.05531621  | -0.97090974 | 0.335586092 | 0.518388415 |
| 213521_at   | 0.066878393  | 1.731128168 | 0.088694418 | 0.198746066 |
| 213522_s_at | 0.007274669  | 0.18012461  | 0.857676551 | 0.922383359 |
| 213523_at   | -0.09531265  | -2.41224507 | 0.019006748 | 0.059149752 |
| 213524_s_at | 0.367388289  | 4.099763205 | 0.000129176 | 0.000915933 |
| 213525_at   | -0.02900645  | -1.07221484 | 0.28802197  | 0.46618564  |
| 213526_s_at | 0.029369228  | 0.627685835 | 0.532649608 | 0.699622139 |
| 213527_s_at | 0.266246082  | 6.289677632 | 4.37E-08    | 1.33E-06    |
| 213528_at   | 0.073495119  | 1.781995488 | 0.07993423  | 0.18358706  |
| 213529_at   | 0.053177691  | 1.428896658 | 0.158346034 | 0.305992123 |
| 213530_at   | -0.011117653 | -0.25008389 | 0.803397643 | 0.88937622  |
| 213531_s_at | 0.129300032  | 2.81135043  | 0.006700233 | 0.025100321 |
| 213532_at   | 0.138959158  | 3.04181943  | 0.003515503 | 0.01468363  |
| 213533_at   | -0.84544144  | -6.31433876 | 3.97E-08    | 1.24E-06    |
| 213534_s_at | -0.35911556  | -5.31719119 | 1.72E-06    | 2.51E-05    |
| 213535_s_at | 0.01713842   | 0.391176251 | 0.697086489 | 0.820710995 |
| 213536_s_at | -0.07995584  | -1.80349209 | 0.076455241 | 0.177190295 |
| 213537_at   | 0.099918127  | 1.348415636 | 0.182716447 | 0.339563632 |
| 213538_at   | 0.001675863  | 0.055544204 | 0.95589397  | 0.977324608 |
| 213539_at   | 0.010786928  | 0.227298129 | 0.820983522 | 0.900534939 |
| 213540_at   | 0.090492577  | 1.689036344 | 0.096530288 | 0.211902925 |
| 213541_s_at | 0.009861265  | 0.186519458 | 0.852682009 | 0.919152541 |
| 213542_at   | -0.04948835  | -1.35604258 | 0.180291094 | 0.336517272 |
| 213543_at   | 0.076653062  | 1.521828913 | 0.13343328  | 0.2703509   |
| 213544_at   | 0.010858121  | 0.241607011 | 0.809928638 | 0.893311313 |
| 213545_x_at | -0.16105672  | -2.78187951 | 0.007260307 | 0.026838516 |
| 213546_at   | 0.414065511  | 6.598555149 | 1.33E-08    | 5.54E-07    |
| 213547_at   | -0.04086345  | -0.77555707 | 0.441131039 | 0.621435095 |
| 213548_s_at | -0.07282684  | -1.4980713  | 0.139485547 | 0.279233508 |
| 213549_at   | -0.02114392  | -0.2692048  | 0.788718243 | 0.879475941 |
| 213550_s_at | -0.04189221  | -1.17849506 | 0.243365385 | 0.41416876  |
| 213551_x_at | 0.075261861  | 1.713837836 | 0.091847189 | 0.204108924 |
| 213552_at   | -0.22525192  | -4.25368397 | 7.68E-05    | 0.000590597 |
| 213553_x_at | -0.07658744  | -1.18414805 | 0.241138122 | 0.411318077 |
| 213554_s_at | -0.09344542  | -2.19051193 | 0.032480579 | 0.090743392 |
| 213555_at   | -0.01902397  | -0.5742448  | 0.568001262 | 0.727445574 |
| 213556_at   | 0.018020754  | 0.515163321 | 0.608377959 | 0.757814536 |
| 213557_at   | 0.017478278  | 0.505348172 | 0.615210895 | 0.763276713 |
| 213558_at   | -0.96758381  | -6.14317096 | 7.66E-08    | 2.05E-06    |
| 213559_s_at | 0.027005194  | 0.662665546 | 0.510144361 | 0.680992424 |
| 213560_at   | 0.005000108  | 0.115257456 | 0.908635326 | 0.951648153 |
| 213561_at   | -0.02476721  | -0.52233916 | 0.60340446  | 0.754183856 |
| 213562_s_at | 0.002551165  | 0.071049147 | 0.943600705 | 0.970855038 |
| 213563_s_at | 0.087692203  | 1.85606744  | 0.068477113 | 0.163028934 |
| 213564_x_at | -0.03539695  | -0.72831725 | 0.469321574 | 0.646083291 |
| 213565_s_at | -0.04303781  | -0.80326389 | 0.425070315 | 0.606447448 |
| 213566_at   | 0.140069031  | 1.620610682 | 0.110473563 | 0.234653998 |
| 213567_at   | 0.152555815  | 3.326444734 | 0.001523094 | 0.007252521 |
| 213568_at   | 0.012693903  | 0.46129616  | 0.646294831 | 0.785409196 |
| 213569_at   | -0.0756672   | -2.27206859 | 0.026770243 | 0.077778225 |
| 213570_at   | 0.050338426  | 1.223030057 | 0.226216894 | 0.393740914 |
| 213571_s_at | 0.134893463  | 3.750600838 | 0.000406519 | 0.00240574  |
| 213572_s_at | 0.25105314   | 2.553492651 | 0.013289565 | 0.043998612 |
| 213573_at   | 0.080105147  | 1.844826228 | 0.070121277 | 0.165930025 |
| 213574_s_at | 0.241257437  | 4.089830773 | 0.000133547 | 0.000940365 |
| 213575_at   | 0.268030901  | 4.46510399  | 3.71E-05    | 0.000321052 |
| 213577_at   | 0.129938348  | 3.11318197  | 0.002861916 | 0.012340063 |
| 213578_at   | 0.320352069  | 3.121583166 | 0.002792942 | 0.01209986  |
| 213579_s_at | 0.104474801  | 2.979349002 | 0.004199462 | 0.017086887 |
| 213580_at   | 0.026278241  | 1.430946143 | 0.157760087 | 0.305076763 |
| 213581_at   | -0.13700554  | -3.01362735 | 0.00381018  | 0.015740854 |
| 213582_at   | 0.002581997  | 0.094742761 | 0.924842564 | 0.960644617 |
| 213583_x_at | 0.085958131  | 2.625736938 | 0.011013926 | 0.037687344 |
| 213584_s_at | -0.03394126  | -0.89173338 | 0.376184985 | 0.558924846 |
| 213585_s_at | -0.04757331  | -1.16870355 | 0.247258233 | 0.419022635 |
| 213586_at   | 0.036656689  | 1.14285553  | 0.257749028 | 0.43149528  |
| 213587_s_at | -0.07646135  | -1.07721662 | 0.285800689 | 0.463631974 |
| 213588_x_at | -0.14379556  | -2.84022747 | 0.006190336 | 0.023519381 |
| 213589_s_at | -0.088562    | -2.27111677 | 0.026831399 | 0.077902221 |
| 213590_at   | 0.027969538  | 0.898779001 | 0.372450816 | 0.5555561   |
| 213591_at   | 0.248677153  | 3.768575967 | 0.000383693 | 0.002288843 |
| 213592_at   | 0.959473249  | 5.981459078 | 1.42E-07    | 3.32E-06    |
| 213593_s_at | 0.622449017  | 6.660244635 | 1.05E-08    | 4.61E-07    |
| 213594_x_at | -0.14158699  | -1.71625418 | 0.09140111  | 0.203329935 |

|             |             |             |             |             |
|-------------|-------------|-------------|-------------|-------------|
| 213595_s_at | 0.000237016 | 0.006069448 | 0.995177938 | 0.997746342 |
| 213596_at   | 0.083861335 | 1.859058287 | 0.06804518  | 0.16225125  |
| 213597_s_at | -0.01312724 | -0.40662509 | 0.685765528 | 0.812390208 |
| 213598_at   | 0.125804043 | 1.600465233 | 0.114876446 | 0.241602735 |
| 213599_at   | 0.025503313 | 0.894157396 | 0.374897594 | 0.558069589 |
| 213600_at   | 0.064233181 | 1.670917932 | 0.100073901 | 0.217724172 |
| 213601_at   | -0.11950648 | -1.61965336 | 0.110679651 | 0.234971353 |
| 213602_s_at | 0.063354343 | 1.627310834 | 0.109039871 | 0.232400682 |
| 213603_s_at | 0.112212673 | 2.511799988 | 0.014789259 | 0.048014061 |
| 213604_at   | 0.033696002 | 0.860141777 | 0.393218334 | 0.575960729 |
| 213605_s_at | 0.423321074 | 3.594652407 | 0.000667139 | 0.003646746 |
| 213606_s_at | -0.5445078  | -4.71476801 | 1.54E-05    | 0.000153373 |
| 213607_x_at | -0.02920275 | -0.76090335 | 0.449767614 | 0.629198804 |
| 213608_s_at | -0.06560978 | -2.01872432 | 0.048102132 | 0.123739137 |
| 213609_s_at | -0.15810538 | -2.60199626 | 0.011719271 | 0.039684625 |
| 213610_s_at | 0.005049042 | 0.162712179 | 0.871305184 | 0.930519291 |
| 213611_at   | 0.006267592 | 0.164588869 | 0.869834344 | 0.929703843 |
| 213612_x_at | 0.206715112 | 4.304962702 | 6.44E-05    | 0.000508515 |
| 213613_s_at | 0.005774168 | 0.123172456 | 0.902392265 | 0.94815364  |
| 213614_x_at | 0.032753708 | 0.786852905 | 0.434540554 | 0.615231857 |
| 213615_at   | 0.06304944  | 1.526297959 | 0.132318426 | 0.268646951 |
| 213616_at   | -0.37241611 | -5.19768137 | 2.68E-06    | 3.60E-05    |
| 213617_s_at | -0.28441646 | -4.29773924 | 6.60E-05    | 0.000519329 |
| 213618_at   | 0.173427687 | 3.042170203 | 0.003511974 | 0.014676079 |
| 213619_at   | 0.087068428 | 1.16993708  | 0.246765364 | 0.418441252 |
| 213620_s_at | 0.404937714 | 4.1860062   | 9.66E-05    | 0.000715295 |
| 213621_s_at | 0.056994891 | 1.490062981 | 0.141573842 | 0.282288665 |
| 213622_at   | 0.332150502 | 3.718832742 | 0.000450076 | 0.002620158 |
| 213623_at   | -0.11278845 | -1.42702077 | 0.158883831 | 0.306757668 |
| 213624_at   | 0.071127313 | 1.415115519 | 0.162330045 | 0.311581102 |
| 213625_at   | -0.02793709 | -0.91303837 | 0.364965761 | 0.548333233 |
| 213626_at   | 0.161133779 | 3.241730131 | 0.001962303 | 0.008965368 |
| 213627_at   | 0.200871745 | 4.258135365 | 7.56E-05    | 0.000583206 |
| 213628_at   | 0.116508874 | 3.529883392 | 0.000816879 | 0.004304276 |
| 213629_x_at | 0.8593602   | 6.561193566 | 1.53E-08    | 6.12E-07    |
| 213630_at   | 0.198438807 | 2.162070274 | 0.03471011  | 0.095662569 |
| 213631_x_at | 0.104242488 | 2.689664585 | 0.00930272  | 0.032918222 |
| 213632_at   | 0.035032279 | 0.888804796 | 0.377744081 | 0.560291344 |
| 213633_at   | -0.08379922 | -1.46761377 | 0.147559284 | 0.290862238 |
| 213634_s_at | 0.098985951 | 2.767434268 | 0.007550286 | 0.027715597 |
| 213635_s_at | 0.07975186  | 3.267287994 | 0.001818592 | 0.008424183 |
| 213636_at   | -0.46438558 | -7.01519885 | 2.64E-09    | 1.76E-07    |
| 213637_at   | 0.151576385 | 3.322170814 | 0.001542823 | 0.007334524 |
| 213638_at   | -0.79235655 | -7.16293196 | 1.49E-09    | 1.20E-07    |
| 213639_s_at | 0.064490111 | 2.27095554  | 0.026841771 | 0.077907028 |
| 213640_s_at | 0.005031829 | 0.131331218 | 0.89596341  | 0.944217995 |
| 213641_at   | 0.10107297  | 1.61810879  | 0.111012816 | 0.235516224 |
| 213642_at   | 0.01660449  | 0.283633448 | 0.777691574 | 0.87253651  |
| 213643_s_at | 0.049143385 | 1.76399452  | 0.082948105 | 0.188743786 |
| 213644_at   | 0.111637568 | 4.287249204 | 6.85E-05    | 0.000534832 |
| 213645_at   | 0.104976135 | 0.760113392 | 0.450235974 | 0.629676622 |
| 213646_x_at | -0.05754668 | -0.7662828  | 0.446585717 | 0.626453512 |
| 213647_at   | 0.018317801 | 0.498855011 | 0.619750128 | 0.766667001 |
| 213648_at   | 0.077881577 | 2.605727109 | 0.011605771 | 0.039388262 |
| 213649_at   | 0.22313143  | 2.923189038 | 0.004918076 | 0.019452928 |
| 213650_at   | -0.03155358 | -0.61350741 | 0.541916424 | 0.706924655 |
| 213651_at   | -0.11095127 | -3.38637272 | 0.001270386 | 0.006224083 |
| 213652_at   | 0.059821036 | 2.02617116  | 0.047309859 | 0.122119223 |
| 213653_at   | 0.082853026 | 2.026173462 | 0.047309663 | 0.122119223 |
| 213654_at   | 0.051557557 | 1.750088342 | 0.085340548 | 0.193027976 |
| 213655_at   | -0.01873188 | -0.21717631 | 0.828825759 | 0.904983529 |
| 213656_s_at | 0.616542678 | 8.647514495 | 4.71E-12    | 4.02E-09    |
| 213657_s_at | 0.118595928 | 1.960748879 | 0.05466975  | 0.136856576 |
| 213658_at   | 0.199910388 | 2.271305369 | 0.026819271 | 0.077872068 |
| 213659_at   | 0.042298746 | 1.632776077 | 0.107881633 | 0.230591895 |
| 213660_s_at | -0.07066292 | -1.94190347 | 0.056963637 | 0.141261729 |
| 213661_at   | 0.361301673 | 4.815075253 | 1.08E-05    | 0.000113297 |
| 213662_at   | -6.50E-05   | -0.00223555 | 0.998223891 | 0.999112838 |
| 213663_s_at | 0.002347809 | 0.083077241 | 0.934073424 | 0.965731266 |
| 213664_at   | -0.64642145 | -5.77773257 | 3.08E-07    | 6.10E-06    |
| 213665_at   | 0.023883547 | 0.580676452 | 0.563686362 | 0.724302646 |
| 213666_at   | -0.09638972 | -1.770304   | 0.081881137 | 0.186853005 |
| 213667_at   | 0.111004283 | 3.224829573 | 0.002063135 | 0.009352434 |
| 213668_s_at | 0.102692578 | 2.617833515 | 0.011244326 | 0.038361177 |
| 213669_at   | 0.10087491  | 2.166603864 | 0.034345977 | 0.094857893 |

|             |             |             |             |             |
|-------------|-------------|-------------|-------------|-------------|
| 213670_x_at | 0.092931536 | 2.313658294 | 0.024215795 | 0.071900897 |
| 213671_s_at | -0.01540614 | -0.25083646 | 0.802818497 | 0.888944162 |
| 213672_at   | -0.00551566 | -0.14491625 | 0.885274563 | 0.938530476 |
| 213673_x_at | -0.01697614 | -0.30970814 | 0.757882212 | 0.860769297 |
| 213674_x_at | 0.007438567 | 0.166854381 | 0.868059384 | 0.928495082 |
| 213675_at   | 0.245256268 | 4.760752426 | 1.31E-05    | 0.000133228 |
| 213676_at   | -0.21634127 | -2.71301134 | 0.008741016 | 0.031267286 |
| 213677_s_at | 0.036689877 | 0.71381835  | 0.478174669 | 0.653768669 |
| 213678_at   | -0.10084081 | -2.77248549 | 0.007447697 | 0.027404286 |
| 213679_at   | 0.098550889 | 2.330865233 | 0.023223937 | 0.069522207 |
| 213680_at   | -0.00730552 | -0.19351767 | 0.847223168 | 0.916029946 |
| 213681_at   | 0.020374934 | 0.544173167 | 0.588388168 | 0.743060988 |
| 213682_at   | -0.19789342 | -3.28457748 | 0.001727063 | 0.008064559 |
| 213683_at   | -0.35704272 | -6.42051442 | 2.64E-08    | 9.00E-07    |
| 213684_s_at | 0.256318145 | 4.884367223 | 8.39E-06    | 9.22E-05    |
| 213685_at   | 0.072594695 | 1.77070368  | 0.081813937 | 0.186771643 |
| 213686_at   | -0.18673833 | -3.48016078 | 0.000952993 | 0.004898351 |
| 213687_s_at | -0.1496463  | -2.51743312 | 0.014578068 | 0.047431785 |
| 213688_at   | -0.3624604  | -5.64793688 | 5.02E-07    | 9.08E-06    |
| 213689_x_at | -0.04640886 | -0.79660336 | 0.428898896 | 0.610010166 |
| 213690_s_at | -0.07866291 | -1.21248366 | 0.230195734 | 0.398154254 |
| 213691_at   | 0.046045684 | 1.148949669 | 0.255247536 | 0.428499845 |
| 213692_s_at | -0.08040403 | -2.20803343 | 0.031170586 | 0.087813656 |
| 213693_s_at | 0.064277313 | 1.35069164  | 0.181990099 | 0.338670115 |
| 213694_at   | 0.108712702 | 1.453343987 | 0.151465897 | 0.296314899 |
| 213695_at   | 0.207443735 | 2.86931161  | 0.005713209 | 0.021990764 |
| 213696_s_at | -0.00161657 | -0.04902443 | 0.961066636 | 0.980188777 |
| 213697_at   | 0.00768328  | 0.241728707 | 0.80983478  | 0.893260674 |
| 213698_at   | 0.215140288 | 3.592107541 | 0.000672493 | 0.003671745 |
| 213699_s_at | 0.081857975 | 0.874658553 | 0.385332522 | 0.567946741 |
| 213700_s_at | 0.178673704 | 4.471055625 | 3.63E-05    | 0.000315324 |
| 213701_at   | -0.06442472 | -0.91058611 | 0.366246097 | 0.549553473 |
| 213702_x_at | 0.062404649 | 1.296466724 | 0.199899993 | 0.361639025 |
| 213703_at   | -0.17364305 | -3.2054925  | 0.002184479 | 0.009818841 |
| 213704_at   | 0.093874636 | 1.255214954 | 0.214386155 | 0.38010254  |
| 213705_at   | 0.208698701 | 3.412721234 | 0.001172329 | 0.005818939 |
| 213706_at   | -0.00196836 | -0.03852575 | 0.969399528 | 0.984579813 |
| 213707_s_at | -0.19484806 | -4.26177809 | 7.47E-05    | 0.0005771   |
| 213708_s_at | -0.07578328 | -2.6337524  | 0.010784662 | 0.037047512 |
| 213709_at   | -0.19716506 | -3.43753278 | 0.001086585 | 0.005453914 |
| 213710_s_at | -0.38627829 | -5.51691484 | 8.20E-07    | 1.36E-05    |
| 213711_at   | 0.003234721 | 0.060716597 | 0.951791635 | 0.975272188 |
| 213712_at   | 0.032895566 | 0.427670804 | 0.670459277 | 0.80156669  |
| 213713_s_at | 0.048996663 | 1.088622029 | 0.280780076 | 0.457913939 |
| 213714_at   | -0.91220659 | -6.77377029 | 6.74E-09    | 3.39E-07    |
| 213715_s_at | 0.001824689 | 0.037088534 | 0.970540545 | 0.98513282  |
| 213716_s_at | -0.01020368 | -0.2419304  | 0.809679234 | 0.89313319  |
| 213717_at   | -0.05227135 | -1.01009042 | 0.316607026 | 0.497791907 |
| 213718_at   | -0.01949291 | -0.35372698 | 0.724813739 | 0.839210366 |
| 213719_s_at | -0.03641488 | -1.17814199 | 0.243504984 | 0.414327448 |
| 213720_s_at | -0.21729479 | -3.08047781 | 0.003145895 | 0.013365941 |
| 213721_at   | 0.429524505 | 5.194501946 | 2.71E-06    | 3.64E-05    |
| 213722_at   | 0.022432211 | 0.524082008 | 0.60219935  | 0.753267468 |
| 213723_s_at | 0.010713403 | 0.321915407 | 0.748663004 | 0.855068974 |
| 213724_s_at | -0.34339072 | -8.1797417  | 2.86E-11    | 1.07E-08    |
| 213725_x_at | 0.084712148 | 2.053510431 | 0.044497209 | 0.116459902 |
| 213726_x_at | -0.06428738 | -0.86693249 | 0.389517065 | 0.572415384 |
| 213727_x_at | 0.040658848 | 0.975387009 | 0.333380024 | 0.516085326 |
| 213728_at   | 0.114186731 | 4.246319121 | 7.87E-05    | 0.000602805 |
| 213729_at   | 0.273831905 | 4.744606132 | 1.38E-05    | 0.000139849 |
| 213730_x_at | 0.084295153 | 2.520574153 | 0.014461495 | 0.047123725 |
| 213731_s_at | -0.03283596 | -0.80065784 | 0.426565872 | 0.607833247 |
| 213732_at   | 0.034220443 | 0.918977958 | 0.361876571 | 0.545095642 |
| 213733_at   | 0.177937831 | 3.65212705  | 0.000556517 | 0.003135338 |
| 213734_at   | -0.2869718  | -3.7322114  | 0.000431214 | 0.002526128 |
| 213735_s_at | -0.16960513 | -2.85468076 | 0.005948808 | 0.022741275 |
| 213736_at   | -0.06127985 | -1.52973869 | 0.131465148 | 0.267428119 |
| 213737_x_at | 0.096550843 | 1.551337277 | 0.12620838  | 0.259476718 |
| 213738_s_at | -0.3209322  | -3.73720098 | 0.000424375 | 0.002491944 |
| 213739_at   | -0.0523211  | -1.72416077 | 0.089953948 | 0.200810281 |
| 213740_s_at | -0.06868702 | -1.34713289 | 0.183126785 | 0.340077382 |
| 213741_s_at | -0.10795089 | -2.21500203 | 0.030662645 | 0.086606519 |
| 213742_at   | 0.265656295 | 2.537334347 | 0.013853613 | 0.045518723 |
| 213743_at   | -0.0447866  | -1.28652481 | 0.203322374 | 0.366170356 |
| 213744_at   | -0.55609177 | -7.39642379 | 6.00E-10    | 6.57E-08    |

|             |             |             |             |             |
|-------------|-------------|-------------|-------------|-------------|
| 213745_at   | -0.62667211 | -6.47921963 | 2.10E-08    | 7.63E-07    |
| 213746_s_at | 0.278404041 | 4.816505033 | 1.07E-05    | 0.000112825 |
| 213747_at   | 0.014324999 | 0.391533095 | 0.696824198 | 0.820553502 |
| 213748_at   | 0.035781268 | 0.837747185 | 0.405578574 | 0.587899508 |
| 213749_at   | 0.143320643 | 3.415762286 | 0.001161485 | 0.005770882 |
| 213750_at   | -0.11921946 | -1.89096478 | 0.063578665 | 0.153908445 |
| 213751_at   | -0.07327161 | -2.03876842 | 0.045995371 | 0.119585978 |
| 213752_at   | 0.125216028 | 2.626490742 | 0.010992178 | 0.037635977 |
| 213753_x_at | -0.02820007 | -0.52669523 | 0.600394497 | 0.751977997 |
| 213754_s_at | 0.060069785 | 0.991952248 | 0.325301545 | 0.507447702 |
| 213755_s_at | 0.024872445 | 0.648519109 | 0.519184065 | 0.688506995 |
| 213756_s_at | -0.05326018 | -1.87775686 | 0.065396553 | 0.157379933 |
| 213757_at   | 0.012475694 | 0.168096909 | 0.867086191 | 0.928071415 |
| 213758_at   | -0.03918644 | -0.76905422 | 0.444951591 | 0.625142298 |
| 213759_at   | -0.00643494 | -0.22877878 | 0.819837857 | 0.899631543 |
| 213760_s_at | 0.009218366 | 0.294264391 | 0.769596332 | 0.868073274 |
| 213761_at   | 0.339944411 | 3.577469844 | 0.000704091 | 0.003812824 |
| 213762_x_at | -0.13325737 | -2.05382512 | 0.044465695 | 0.11639787  |
| 213763_at   | 0.273103192 | 3.858469528 | 0.000286798 | 0.001792917 |
| 213764_s_at | 0.067200107 | 2.641751817 | 0.010560203 | 0.036444526 |
| 213765_at   | 0.08257508  | 2.07665272  | 0.04223056  | 0.111658771 |
| 213766_x_at | 0.046317788 | 0.970095317 | 0.335988414 | 0.518812638 |
| 213767_at   | -0.00867864 | -0.22153693 | 0.825445016 | 0.903135218 |
| 213768_s_at | 0.215221671 | 3.437753592 | 0.001085849 | 0.005451446 |
| 213769_at   | 0.024852371 | 0.588659646 | 0.558353193 | 0.720129311 |
| 213770_at   | -0.00572206 | -0.13608025 | 0.892224519 | 0.942344279 |
| 213771_at   | -0.06800518 | -2.68259277 | 0.009479269 | 0.033415957 |
| 213772_s_at | -0.06319497 | -1.47468205 | 0.145653693 | 0.28807164  |
| 213773_x_at | 0.099647254 | 2.79051465  | 0.007091894 | 0.026333576 |
| 213774_s_at | 0.009779994 | 0.261579116 | 0.794563696 | 0.883173515 |
| 213775_x_at | 0.158277542 | 3.109154239 | 0.002895547 | 0.01245623  |
| 213776_at   | 0.176894424 | 3.735286698 | 0.000426987 | 0.002503988 |
| 213777_s_at | -0.01276548 | -0.29441606 | 0.769481024 | 0.867987025 |
| 213778_x_at | 0.053678273 | 1.566279012 | 0.122671051 | 0.253815491 |
| 213779_at   | 0.193507553 | 4.393894915 | 4.74E-05    | 0.00039383  |
| 213780_at   | -0.11655936 | -2.72467404 | 0.00847222  | 0.030508458 |
| 213781_at   | -0.03122603 | -1.01392391 | 0.314789648 | 0.496088682 |
| 213782_s_at | 0.020885883 | 0.814396006 | 0.418717302 | 0.601134394 |
| 213783_at   | -0.08118921 | -1.33796807 | 0.186078919 | 0.343816729 |
| 213784_at   | 0.060043217 | 1.021417617 | 0.311257388 | 0.492153376 |
| 213785_at   | -0.0592615  | -1.46740541 | 0.147615753 | 0.290922222 |
| 213786_at   | -0.05862568 | -1.1975447  | 0.235918751 | 0.405043249 |
| 213787_s_at | -0.18576642 | -4.03159313 | 0.000162202 | 0.001104206 |
| 213788_s_at | -0.00086962 | -0.02040491 | 0.98378973  | 0.992068107 |
| 213789_at   | -0.00548873 | -0.08195486 | 0.934962058 | 0.966170385 |
| 213790_at   | -0.07144784 | -2.29229129 | 0.02549976  | 0.074887323 |
| 213791_at   | -1.37716378 | -5.26482735 | 2.09E-06    | 2.94E-05    |
| 213792_s_at | 0.356668643 | 4.356174764 | 5.40E-05    | 0.000439913 |
| 213793_s_at | -0.86765148 | -5.91332932 | 1.84E-07    | 4.05E-06    |
| 213794_s_at | 0.015052979 | 0.337810241 | 0.736714064 | 0.847072326 |
| 213795_s_at | 0.090509884 | 1.439825448 | 0.155240942 | 0.301614058 |
| 213796_at   | 0.047005101 | 1.277941535 | 0.206312097 | 0.369736957 |
| 213797_at   | -0.12259775 | -2.34769507 | 0.022288981 | 0.067217226 |
| 213798_s_at | -0.1854718  | -2.66074984 | 0.01004411  | 0.035026156 |
| 213799_s_at | -0.05988675 | -1.43534703 | 0.156507569 | 0.303231295 |
| 213800_at   | 0.347003014 | 3.953649328 | 0.000209962 | 0.001372407 |
| 213801_x_at | -0.07289241 | -1.64386913 | 0.105561426 | 0.226785964 |
| 213802_at   | -0.04224247 | -1.87402832 | 0.065917623 | 0.158292968 |
| 213803_at   | 0.136969283 | 2.627751616 | 0.010955887 | 0.037531849 |
| 213804_at   | 0.171602882 | 4.669857498 | 1.81E-05    | 0.000174925 |
| 213805_at   | 0.137531132 | 2.611113011 | 0.011443685 | 0.038934317 |
| 213806_at   | 0.01745116  | 0.689242468 | 0.493392458 | 0.667050722 |
| 213807_x_at | 0.047148859 | 1.255112602 | 0.214423039 | 0.38010254  |
| 213808_at   | -1.15533122 | -7.5866369  | 2.86E-10    | 4.11E-08    |
| 213809_x_at | -0.00516613 | -0.11788341 | 0.90656341  | 0.950369017 |
| 213810_s_at | -0.06498283 | -1.79264391 | 0.078194743 | 0.180324017 |
| 213811_x_at | 0.14774356  | 4.876957068 | 8.61E-06    | 9.43E-05    |
| 213812_s_at | -0.40852698 | -3.76319336 | 0.000390396 | 0.002323557 |
| 213813_x_at | 0.087536832 | 1.389209959 | 0.170028547 | 0.322479876 |
| 213814_s_at | -0.05175363 | -1.51450329 | 0.135276852 | 0.273058718 |
| 213815_x_at | 0.022316445 | 0.701962426 | 0.485483012 | 0.660306153 |
| 213816_s_at | 0.011413292 | 0.230132681 | 0.818790603 | 0.898994998 |
| 213817_at   | 0.156804998 | 3.931212184 | 0.000226054 | 0.0014646   |
| 213818_x_at | -0.14251165 | -2.5951187  | 0.011931151 | 0.040283071 |
| 213819_s_at | 0.057932742 | 1.53409565  | 0.130390939 | 0.265801488 |



|             |             |             |             |             |
|-------------|-------------|-------------|-------------|-------------|
| 213820_s_at | 0.063626395 | 1.365930781 | 0.177183281 | 0.332214935 |
| 213821_s_at | -0.01580736 | -0.37977435 | 0.705486621 | 0.826392544 |
| 213822_s_at | -0.00776418 | -0.10414189 | 0.917412572 | 0.956202399 |
| 213823_at   | 0.088298406 | 2.235932106 | 0.029180626 | 0.083278451 |
| 213824_at   | -0.07168946 | -0.9711942  | 0.335445646 | 0.51826103  |
| 213825_at   | 0.369897474 | 3.702983734 | 0.000473444 | 0.002734801 |
| 213826_s_at | 0.048134277 | 1.500685158 | 0.138809232 | 0.278290965 |
| 213827_at   | -0.31103831 | -5.18964184 | 2.76E-06    | 3.69E-05    |
| 213828_x_at | 0.247866979 | 5.589866294 | 6.24E-07    | 1.08E-05    |
| 213829_x_at | -0.06771167 | -1.58384386 | 0.118614802 | 0.247450532 |
| 213830_at   | 0.038536612 | 0.857679764 | 0.394565631 | 0.5771964   |
| 213831_at   | 0.09204043  | 1.254425056 | 0.214670927 | 0.380359954 |
| 213832_at   | -0.3413998  | -5.31974004 | 1.71E-06    | 2.49E-05    |
| 213833_x_at | 0.000329649 | 0.011245491 | 0.991065805 | 0.995811798 |
| 213834_at   | -0.29945144 | -5.37232041 | 1.41E-06    | 2.11E-05    |
| 213835_x_at | 0.013092782 | 0.481664559 | 0.631839248 | 0.775290325 |
| 213836_s_at | 0.218266481 | 4.400382244 | 4.64E-05    | 0.000386599 |
| 213837_at   | 0.016648338 | 0.412144273 | 0.681738364 | 0.809679803 |
| 213838_at   | -0.04063599 | -0.75733768 | 0.451883919 | 0.631250465 |
| 213839_at   | 0.551711641 | 5.11140341  | 3.68E-06    | 4.69E-05    |
| 213840_s_at | 0.009157393 | 0.300039162 | 0.765209673 | 0.865090325 |
| 213841_at   | 0.153179608 | 2.355240331 | 0.021880823 | 0.066266703 |
| 213842_x_at | 0.066195295 | 2.237043812 | 0.029103707 | 0.083117315 |
| 213843_x_at | 0.134846336 | 1.841122296 | 0.07067025  | 0.166784327 |
| 213844_at   | 0.027941212 | 0.605002192 | 0.547514645 | 0.711013352 |
| 213845_at   | -0.28445307 | -4.33869271 | 5.74E-05    | 0.000462557 |
| 213846_at   | -0.35703675 | -5.07863877 | 4.15E-06    | 5.17E-05    |
| 213847_at   | 0.084259179 | 1.769662191 | 0.081989147 | 0.187037873 |
| 213848_at   | 0.085629484 | 1.122960931 | 0.266036499 | 0.441241862 |
| 213849_s_at | -0.53021049 | -5.60795995 | 5.83E-07    | 1.03E-05    |
| 213850_s_at | 0.378054528 | 5.718507063 | 3.85E-07    | 7.33E-06    |
| 213851_at   | 0.029296554 | 0.891884553 | 0.376104616 | 0.558898338 |
| 213852_at   | -0.00689847 | -0.16659993 | 0.868258707 | 0.928616176 |
| 213853_at   | -0.08335641 | -2.97755401 | 0.004220833 | 0.017151981 |
| 213854_at   | 0.046430358 | 1.370582756 | 0.175735421 | 0.330331739 |
| 213855_s_at | -0.15049842 | -2.63854251 | 0.010649738 | 0.036679876 |
| 213856_at   | 0.04794987  | 2.209446096 | 0.031067023 | 0.087549491 |
| 213857_s_at | 0.140695524 | 2.224702328 | 0.029967734 | 0.08504686  |
| 213858_at   | 0.068380856 | 2.548523941 | 0.013460754 | 0.044456696 |
| 213859_x_at | 0.143951478 | 2.653143973 | 0.010247899 | 0.035556175 |
| 213860_x_at | 0.094190957 | 1.385193672 | 0.171246825 | 0.324130235 |
| 213861_s_at | 0.034518414 | 0.811737927 | 0.420229016 | 0.602275271 |
| 213862_at   | 0.020879255 | 0.71464501  | 0.477667402 | 0.653260857 |
| 213863_s_at | -0.0505162  | -1.51506879 | 0.135133824 | 0.272868606 |
| 213864_s_at | 0.013367082 | 0.224859864 | 0.822871009 | 0.901631635 |
| 213865_at   | -0.03316376 | -0.74236805 | 0.460831507 | 0.63917453  |
| 213866_at   | -0.15611668 | -3.18938861 | 0.002290622 | 0.010213756 |
| 213867_x_at | -0.1082843  | -2.27074844 | 0.026855098 | 0.077930527 |
| 213868_s_at | -0.00716765 | -0.19406625 | 0.84679557  | 0.915775411 |
| 213869_x_at | -0.80678861 | -6.5120507  | 1.85E-08    | 7.00E-07    |
| 213870_at   | 0.05466727  | 1.23266011  | 0.222627943 | 0.389695657 |
| 213871_s_at | -0.06309619 | -1.5933421  | 0.116466724 | 0.244120196 |
| 213872_at   | -0.17164187 | -1.0736253  | 0.287394382 | 0.465558989 |
| 213873_at   | -0.07730895 | -1.30125687 | 0.198266531 | 0.359440524 |
| 213874_at   | -0.05461619 | -0.9375435  | 0.352329372 | 0.535574725 |
| 213875_x_at | 0.103363224 | 1.733465864 | 0.088275101 | 0.198031865 |
| 213876_x_at | 0.174061254 | 3.403637951 | 0.001205293 | 0.005956758 |
| 213877_x_at | 0.007363139 | 0.198458197 | 0.843373895 | 0.913924303 |
| 213878_at   | -0.10278304 | -1.16876919 | 0.247231987 | 0.419009933 |
| 213879_at   | 0.067883888 | 1.940650847 | 0.057118977 | 0.141589687 |
| 213880_at   | 0.249608734 | 2.616046388 | 0.011297029 | 0.038499833 |
| 213881_x_at | 0.051599084 | 1.499421665 | 0.139135827 | 0.27872068  |
| 213882_at   | 0.08707555  | 2.086129217 | 0.04133171  | 0.109697536 |
| 213883_s_at | 0.042599451 | 0.589854099 | 0.557557408 | 0.719597998 |
| 213884_s_at | -0.12851088 | -2.86444671 | 0.005790573 | 0.022244482 |
| 213885_at   | -0.04503813 | -0.94921345 | 0.346412653 | 0.529457757 |
| 213887_s_at | -0.33394467 | -4.23874088 | 8.08E-05    | 0.000615399 |
| 213888_s_at | 0.043027141 | 1.301019602 | 0.198347203 | 0.359543022 |
| 213889_at   | -0.02260438 | -0.61815593 | 0.538869143 | 0.704943086 |
| 213890_x_at | 0.036235921 | 0.984453817 | 0.328942039 | 0.511412165 |
| 213891_s_at | 0.696921921 | 8.289374597 | 1.87E-11    | 8.05E-09    |
| 213892_s_at | 0.025850173 | 0.583333807 | 0.561908324 | 0.723107685 |
| 213893_x_at | -0.0802371  | -1.46672712 | 0.147799696 | 0.29116918  |
| 213894_at   | -0.14041356 | -2.55571447 | 0.013213657 | 0.043776483 |
| 213895_at   | 0.024477795 | 0.601979875 | 0.549511008 | 0.712653318 |

|             |             |             |             |             |
|-------------|-------------|-------------|-------------|-------------|
| 213896_x_at | -0.04680041 | -1.36987074 | 0.175956438 | 0.330563163 |
| 213897_s_at | -0.15682427 | -2.97175309 | 0.004290593 | 0.017391181 |
| 213898_at   | -0.03288984 | -0.94954037 | 0.346247847 | 0.529314478 |
| 213899_at   | 0.098702923 | 2.009470261 | 0.049102525 | 0.125693915 |
| 213900_at   | 0.610518807 | 6.44899683  | 2.36E-08    | 8.31E-07    |
| 213901_x_at | -0.63584851 | -7.21931659 | 1.19E-09    | 1.06E-07    |
| 213902_at   | -0.06709825 | -1.75399127 | 0.084663373 | 0.191787494 |
| 213903_s_at | -0.03785504 | -1.33777463 | 0.186141616 | 0.343889922 |
| 213904_at   | -1.0782193  | -6.58330168 | 1.41E-08    | 5.77E-07    |
| 213905_x_at | 0.529103307 | 6.418196242 | 2.66E-08    | 9.07E-07    |
| 213906_at   | 0.22180337  | 5.256664512 | 2.16E-06    | 3.01E-05    |
| 213907_at   | 0.015147757 | 0.594754429 | 0.554298582 | 0.716657859 |
| 213908_at   | 0.03314326  | 1.519507895 | 0.134015219 | 0.271148905 |
| 213909_at   | -0.05270835 | -1.1590881  | 0.251124411 | 0.423934887 |
| 213910_at   | 0.02903754  | 0.818288331 | 0.416509575 | 0.598792274 |
| 213911_s_at | -0.5626346  | -5.14519979 | 3.25E-06    | 4.22E-05    |
| 213912_at   | -0.42400241 | -7.72721281 | 1.66E-10    | 2.87E-08    |
| 213913_s_at | -0.32718079 | -5.00244393 | 5.47E-06    | 6.48E-05    |
| 213914_s_at | -0.03465879 | -1.31990001 | 0.192004397 | 0.351452346 |
| 213915_at   | 0.048506723 | 1.026259984 | 0.308989189 | 0.489571194 |
| 213916_at   | 0.16271466  | 3.230481056 | 0.002028887 | 0.009215877 |
| 213917_at   | 0.000492438 | 0.012936591 | 0.98972235  | 0.995200271 |
| 213918_s_at | 0.199615044 | 4.343979036 | 5.63E-05    | 0.00045562  |
| 213919_at   | 0.024943761 | 0.733599041 | 0.466119732 | 0.643616619 |
| 213920_at   | 0.014130713 | 0.45054575  | 0.653980527 | 0.790206196 |
| 213921_at   | -0.53013298 | -2.56354312 | 0.012949314 | 0.043047513 |
| 213922_at   | 0.119074766 | 2.502434396 | 0.015146511 | 0.049034979 |
| 213923_at   | -0.01275184 | -0.34306403 | 0.732778679 | 0.844055276 |
| 213924_at   | -1.23913904 | -6.26470043 | 4.80E-08    | 1.42E-06    |
| 213925_at   | -0.30601311 | -4.49202517 | 3.37E-05    | 0.000296267 |
| 213926_s_at | 0.004351703 | 0.13397375  | 0.893882657 | 0.943293044 |
| 213927_at   | -0.25661503 | -3.11314554 | 0.002862219 | 0.012340177 |
| 213928_s_at | -0.02052427 | -0.53933118 | 0.591702922 | 0.745416253 |
| 213929_at   | 0.13040704  | 2.384645166 | 0.020353113 | 0.062468795 |
| 213930_at   | -0.03233174 | -1.20178699 | 0.234283157 | 0.403141547 |
| 213931_at   | 0.731880083 | 4.098698845 | 0.000129638 | 0.000919061 |
| 213932_x_at | 0.226346939 | 3.636413373 | 0.000584885 | 0.003269503 |
| 213933_at   | 0.025322537 | 0.632602199 | 0.529455654 | 0.696978854 |
| 213934_s_at | 0.196191948 | 3.939195944 | 0.000220197 | 0.001431423 |
| 213935_at   | 0.151941183 | 4.652840031 | 1.92E-05    | 0.000184308 |
| 213936_x_at | 0.173315808 | 3.835704144 | 0.000308836 | 0.001907966 |
| 213937_s_at | -0.08669083 | -2.31232275 | 0.024294332 | 0.07209577  |
| 213938_at   | -0.26214538 | -2.45324423 | 0.017153976 | 0.05436464  |
| 213939_s_at | -0.09077983 | -1.5127002  | 0.135733702 | 0.273718064 |
| 213940_s_at | 0.424093819 | 5.22544784  | 2.42E-06    | 3.31E-05    |
| 213941_x_at | 0.038360253 | 0.737688311 | 0.463649372 | 0.641510099 |
| 213942_at   | 0.135169147 | 3.746787848 | 0.000411526 | 0.00243054  |
| 213943_at   | 0.094907344 | 3.357160368 | 0.001388161 | 0.0067107   |
| 213944_x_at | -0.01643872 | -0.39167597 | 0.69671919  | 0.820495235 |
| 213945_s_at | -0.01046636 | -0.27669094 | 0.782991608 | 0.875997219 |
| 213946_s_at | 0.13322967  | 2.473270854 | 0.016309427 | 0.052097842 |
| 213947_s_at | -0.02330655 | -0.79596259 | 0.429268301 | 0.610308349 |
| 213948_x_at | -0.38363585 | -5.40249603 | 1.26E-06    | 1.92E-05    |
| 213949_s_at | -0.04968761 | -0.82192748 | 0.414451834 | 0.596678199 |
| 213950_s_at | -0.02022326 | -0.59805369 | 0.5521099   | 0.714613677 |
| 213951_s_at | 0.093704792 | 2.573678686 | 0.012614206 | 0.042159295 |
| 213952_s_at | 0.061333323 | 1.264094889 | 0.211203989 | 0.376090871 |
| 213953_at   | -0.01933589 | -0.72626022 | 0.470571916 | 0.647121452 |
| 213954_at   | 0.078220311 | 0.925168351 | 0.358674881 | 0.541730693 |
| 213955_at   | -0.09927674 | -2.44970754 | 0.017307147 | 0.054762861 |
| 213956_at   | 0.510950006 | 4.96906515  | 6.18E-06    | 7.17E-05    |
| 213957_s_at | 0.05612703  | 1.199222431 | 0.235270924 | 0.404244624 |
| 213958_at   | 0.050839873 | 1.393698014 | 0.16867506  | 0.320633992 |
| 213959_s_at | -0.08738812 | -1.7467568  | 0.085922133 | 0.194029203 |
| 213960_at   | -0.4976624  | -5.65716823 | 4.85E-07    | 8.82E-06    |
| 213961_s_at | -0.06709314 | -1.90392312 | 0.061836927 | 0.150581155 |
| 213962_s_at | 0.012888884 | 0.332771364 | 0.740495136 | 0.849350225 |
| 213963_s_at | 0.039629818 | 1.847319497 | 0.069753767 | 0.165293496 |
| 213964_x_at | -0.05717599 | -3.27377871 | 0.001783707 | 0.008287499 |
| 213965_s_at | -0.02736597 | -0.44833261 | 0.655567461 | 0.791426823 |
| 213966_at   | 0.038631025 | 1.221112242 | 0.22693666  | 0.394471362 |
| 213967_at   | -0.86357467 | -6.50051631 | 1.94E-08    | 7.22E-07    |
| 213968_at   | -0.01911857 | -0.53962331 | 0.591502684 | 0.745311059 |
| 213969_x_at | 0.007433235 | 0.153195797 | 0.878770487 | 0.93501563  |
| 213970_at   | -0.02187218 | -0.58185669 | 0.562896321 | 0.723733095 |

|             |             |             |             |             |
|-------------|-------------|-------------|-------------|-------------|
| 213971_s_at | -0.03126404 | -0.65983546 | 0.511946028 | 0.682716913 |
| 213972_at   | 0.053650308 | 1.320284651 | 0.191876787 | 0.351290703 |
| 213973_at   | 0.072828805 | 1.651948758 | 0.103897192 | 0.22416594  |
| 213974_at   | 0.557356022 | 5.922532866 | 1.78E-07    | 3.94E-06    |
| 213975_s_at | 0.198619803 | 2.326507858 | 0.023471628 | 0.070148053 |
| 213976_at   | 0.018226118 | 0.575455381 | 0.567187864 | 0.726930494 |
| 213977_s_at | 0.026551034 | 0.854374367 | 0.396378955 | 0.578947095 |
| 213978_at   | 0.084759305 | 1.508025449 | 0.136923837 | 0.275437734 |
| 213979_s_at | 0.021509875 | 0.150268162 | 0.881069384 | 0.936404673 |
| 213980_s_at | -0.05683868 | -0.76855602 | 0.445245088 | 0.625436682 |
| 213981_at   | 0.080097881 | 1.990336389 | 0.051227868 | 0.129914083 |
| 213982_s_at | 0.099928022 | 3.4275302   | 0.001120411 | 0.005599798 |
| 213983_s_at | -0.05471538 | -1.62633054 | 0.109248686 | 0.232734747 |
| 213984_at   | 0.000608646 | 0.026563464 | 0.978898221 | 0.989302142 |
| 213985_s_at | -0.02339027 | -0.4448732  | 0.658051244 | 0.793140257 |
| 213986_s_at | -0.1071695  | -1.13548137 | 0.260799194 | 0.435106675 |
| 213987_s_at | 0.036964416 | 1.010614803 | 0.31635801  | 0.497546423 |
| 213988_s_at | 0.18887015  | 2.121436    | 0.038127609 | 0.102935791 |
| 213989_x_at | 0.006421896 | 0.142313175 | 0.887321096 | 0.939453645 |
| 213990_s_at | -0.34576596 | -5.46185811 | 1.01E-06    | 1.61E-05    |
| 213991_s_at | 0.044220534 | 1.103788741 | 0.274199396 | 0.45044067  |
| 213992_at   | 0.221512496 | 2.948935336 | 0.004575522 | 0.018344777 |
| 213993_at   | 0.278435034 | 3.807210382 | 0.000338718 | 0.002059311 |
| 213994_s_at | 0.342602054 | 3.762061739 | 0.00039182  | 0.002330167 |
| 213995_at   | 0.038521386 | 0.43164829  | 0.667581962 | 0.799793315 |
| 213996_at   | -0.83044576 | -6.95678917 | 3.31E-09    | 2.07E-07    |
| 213997_at   | -0.52831261 | -6.43582599 | 2.49E-08    | 8.61E-07    |
| 213998_s_at | 0.335583194 | 2.987533382 | 0.004103289 | 0.016747416 |
| 213999_at   | -0.04304754 | -1.00465393 | 0.319196439 | 0.500685359 |
| 214000_s_at | 0.001317178 | 0.046082021 | 0.96340165  | 0.981243759 |
| 214001_x_at | -0.0100832  | -0.18329672 | 0.855198307 | 0.920801297 |
| 214002_at   | 0.081063292 | 1.737766194 | 0.087508025 | 0.19681489  |
| 214003_x_at | 0.028777401 | 0.723195297 | 0.472438397 | 0.648677098 |
| 214004_s_at | 0.49825488  | 6.130497122 | 8.04E-08    | 2.12E-06    |
| 214005_at   | 0.070393079 | 1.261269968 | 0.212212491 | 0.377303464 |
| 214006_s_at | -0.04912104 | -1.38415694 | 0.171562387 | 0.324548834 |
| 214007_s_at | -0.0937872  | -0.9921748  | 0.32519391  | 0.507386057 |
| 214008_at   | -0.04564586 | -1.20800939 | 0.231899074 | 0.40031029  |
| 214009_at   | 0.052284348 | 1.614226554 | 0.111853804 | 0.236850669 |
| 214010_s_at | 0.011898368 | 0.357773499 | 0.721799023 | 0.837342659 |
| 214011_s_at | -0.11756613 | -2.9947254  | 0.004020474 | 0.016457938 |
| 214012_at   | 0.090424387 | 1.414068777 | 0.162635792 | 0.312060743 |
| 214013_s_at | -0.02039187 | -0.5502251  | 0.58425752  | 0.739883616 |
| 214014_at   | 0.102914793 | 2.105759457 | 0.039522514 | 0.105859379 |
| 214015_at   | -0.07144045 | -1.55383039 | 0.125612555 | 0.258572904 |
| 214016_s_at | 0.317959189 | 4.435717186 | 4.10E-05    | 0.00034911  |
| 214017_s_at | 0.079445831 | 1.472147893 | 0.146334661 | 0.288996405 |
| 214018_at   | -0.05297954 | -1.38950566 | 0.169939116 | 0.322323938 |
| 214019_at   | -0.04862077 | -1.54080287 | 0.128750938 | 0.263250843 |
| 214020_x_at | 0.210348203 | 3.734279904 | 0.000428366 | 0.00251109  |
| 214021_x_at | 0.036216676 | 1.677510922 | 0.098772315 | 0.215537619 |
| 214022_s_at | 0.476709995 | 3.71933669  | 0.000449352 | 0.002616604 |
| 214023_x_at | 0.082456152 | 0.75953535  | 0.45057887  | 0.630028257 |
| 214024_s_at | -0.0070389  | -0.20586486 | 0.837610413 | 0.91038568  |
| 214025_at   | -0.00323982 | -0.09348506 | 0.9258373   | 0.961105654 |
| 214026_s_at | -0.04604305 | -1.15607991 | 0.252342787 | 0.425300896 |
| 214027_x_at | -0.09233153 | -1.40803328 | 0.164407422 | 0.314689988 |
| 214028_x_at | 0.106598384 | 3.107812309 | 0.002906833 | 0.012497566 |
| 214029_at   | 0.035869956 | 1.316686633 | 0.193072983 | 0.352859154 |
| 214030_at   | 0.026370392 | 0.639815514 | 0.524787615 | 0.693243322 |
| 214031_s_at | 0.029153428 | 0.912594233 | 0.365197433 | 0.54851896  |
| 214032_at   | 0.016282058 | 0.33943988  | 0.735492608 | 0.84617813  |
| 214033_at   | 0.007194084 | 0.194796422 | 0.846226501 | 0.91548465  |
| 214034_at   | 0.050778206 | 2.737336562 | 0.008188981 | 0.029655777 |
| 214035_x_at | 0.124791413 | 2.407016863 | 0.019255486 | 0.059783062 |
| 214036_at   | 0.057521496 | 1.805661325 | 0.076111316 | 0.176548862 |
| 214037_s_at | -0.06142233 | -1.25482596 | 0.214526359 | 0.380219386 |
| 214038_at   | 0.010234172 | 0.305911827 | 0.760756561 | 0.862278199 |
| 214039_s_at | 0.288491364 | 3.381557441 | 0.001289126 | 0.006307598 |
| 214040_s_at | -0.0405559  | -0.4414368  | 0.660522338 | 0.794856749 |
| 214041_x_at | 0.01114444  | 0.144191614 | 0.885844194 | 0.938831297 |
| 214042_s_at | 0.011732645 | 0.204054556 | 0.839018286 | 0.911121566 |
| 214043_at   | 0.221381086 | 2.364428754 | 0.021392796 | 0.065066477 |
| 214044_at   | -1.22819825 | -7.98995089 | 5.97E-11    | 1.59E-08    |
| 214045_at   | -0.03615092 | -1.09508338 | 0.277963231 | 0.454645466 |

|             |             |             |             |             |
|-------------|-------------|-------------|-------------|-------------|
| 214046_at   | 0.085884369 | 1.025873091 | 0.309169999 | 0.4897365   |
| 214047_s_at | -0.00544563 | -0.08282345 | 0.934274352 | 0.965803653 |
| 214048_at   | 0.001581672 | 0.07773036  | 0.9383075   | 0.9676675   |
| 214049_x_at | -0.00462748 | -0.15292738 | 0.878981219 | 0.935104423 |
| 214050_at   | 0.001620793 | 0.043886521 | 0.96514415  | 0.982220707 |
| 214051_at   | -0.00783441 | -0.21247696 | 0.832472747 | 0.907347381 |
| 214052_x_at | 0.036072371 | 1.022837758 | 0.310591019 | 0.491290926 |
| 214053_at   | -0.18050532 | -2.78751258 | 0.007150032 | 0.026509808 |
| 214054_at   | 0.000212883 | 0.004833639 | 0.996159756 | 0.998125468 |
| 214055_x_at | 0.199462351 | 2.646815441 | 0.010420332 | 0.036048107 |
| 214056_at   | 0.012271159 | 0.353972248 | 0.724630888 | 0.839103605 |
| 214057_at   | 0.081193766 | 2.379940846 | 0.020590925 | 0.063030797 |
| 214058_at   | -0.09689362 | -3.16506393 | 0.002460173 | 0.010846674 |
| 214059_at   | 0.025679359 | 0.60291258  | 0.548894526 | 0.712101778 |
| 214060_at   | 0.09148148  | 1.423324643 | 0.159947617 | 0.308252647 |
| 214061_at   | -0.17371196 | -4.11331106 | 0.000123435 | 0.000881524 |
| 214062_x_at | 0.145510025 | 3.327950584 | 0.0015162   | 0.007227176 |
| 214063_s_at | 0.372764796 | 2.400027449 | 0.019592571 | 0.060563784 |
| 214064_at   | 0.35379533  | 3.535816116 | 0.000801932 | 0.004237403 |
| 214065_s_at | 0.070276179 | 2.212704604 | 0.030829293 | 0.086956313 |
| 214066_x_at | -0.05729812 | -2.55642193 | 0.013189569 | 0.043716125 |
| 214067_at   | -0.10133449 | -2.12373684 | 0.037926534 | 0.102504395 |
| 214068_at   | 0.005068348 | 0.149778587 | 0.881453919 | 0.9366129   |
| 214069_at   | 0.00587795  | 0.129120477 | 0.897704733 | 0.945183875 |
| 214070_s_at | 0.107845913 | 1.947485347 | 0.056275792 | 0.139959805 |
| 214071_at   | -1.24500133 | -6.18934905 | 6.42E-08    | 1.78E-06    |
| 214072_x_at | 0.05354758  | 1.680647979 | 0.098157883 | 0.214560594 |
| 214073_at   | 0.164285488 | 3.636773021 | 0.00058422  | 0.003267424 |
| 214074_s_at | 0.022055358 | 0.679606237 | 0.499431216 | 0.672191524 |
| 214075_at   | 0.030143218 | 0.675295687 | 0.502145497 | 0.674355796 |
| 214076_at   | -0.09369284 | -2.24285493 | 0.02870454  | 0.08220408  |
| 214077_x_at | 0.210653547 | 3.170703317 | 0.002419847 | 0.010689711 |
| 214078_at   | -0.15983702 | -4.78908078 | 1.18E-05    | 0.000122381 |
| 214079_at   | -0.02076477 | -1.1323276  | 0.262111475 | 0.436611482 |
| 214080_x_at | 0.083550562 | 2.279830529 | 0.026276118 | 0.076708619 |
| 214081_at   | -0.08593212 | -1.59353543 | 0.116423328 | 0.244061673 |
| 214082_at   | 0.083315205 | 2.590652329 | 0.012070608 | 0.040683227 |
| 214083_at   | 0.161423651 | 3.628166582 | 0.00060032  | 0.003338248 |
| 214084_x_at | 0.095596319 | 2.562365815 | 0.012988758 | 0.043165793 |
| 214085_x_at | -0.20539188 | -2.43003763 | 0.018181696 | 0.05704602  |
| 214086_s_at | -0.15102508 | -2.43353912 | 0.018023169 | 0.056660424 |
| 214087_s_at | 0.952217759 | 5.867739136 | 2.19E-07    | 4.62E-06    |
| 214088_s_at | -0.01460065 | -0.33177623 | 0.741242629 | 0.849839054 |
| 214089_at   | -0.0358143  | -1.30524065 | 0.196915684 | 0.357800482 |
| 214090_at   | 0.05913367  | 1.866334451 | 0.067003956 | 0.160323791 |
| 214091_s_at | -0.26997704 | -2.37691263 | 0.020745319 | 0.063416539 |
| 214092_x_at | -0.19505537 | -4.3025379  | 6.50E-05    | 0.000512034 |
| 214093_s_at | 0.306507444 | 3.393522185 | 0.001243037 | 0.006117589 |
| 214094_at   | -0.01524295 | -0.63098151 | 0.530507443 | 0.697726337 |
| 214095_at   | 0.034968976 | 1.318496249 | 0.192470658 | 0.352060682 |
| 214096_s_at | 0.130988897 | 3.042102345 | 0.003512656 | 0.014676079 |
| 214097_at   | 0.129400616 | 2.335343574 | 0.022971798 | 0.068897895 |
| 214098_at   | -0.96978944 | -7.19379133 | 1.32E-09    | 1.12E-07    |
| 214099_s_at | -0.07562019 | -1.20838099 | 0.23175726  | 0.400142765 |
| 214100_x_at | 0.091076176 | 2.410261232 | 0.01910079  | 0.05938519  |
| 214101_s_at | -0.09653879 | -2.00182846 | 0.04994208  | 0.127332502 |
| 214102_at   | 0.080079975 | 1.572275145 | 0.121274045 | 0.251553866 |
| 214103_s_at | -0.03386036 | -0.92802915 | 0.357201457 | 0.540314022 |
| 214104_at   | 0.227261267 | 4.804285315 | 1.12E-05    | 0.000117047 |
| 214105_at   | -0.03364643 | -0.55688194 | 0.579730044 | 0.736373316 |
| 214106_s_at | -0.12208315 | -2.79729723 | 0.006962142 | 0.025927176 |
| 214107_x_at | 0.128065553 | 2.985762461 | 0.004123924 | 0.016816277 |
| 214108_at   | -0.05303448 | -1.76847443 | 0.082189346 | 0.187356375 |
| 214109_at   | -0.02684877 | -0.80247429 | 0.425523117 | 0.606986025 |
| 214110_s_at | -0.32451414 | -4.92387972 | 7.27E-06    | 8.23E-05    |
| 214111_at   | -0.79025764 | -5.09791855 | 3.86E-06    | 4.88E-05    |
| 214112_s_at | -0.17275499 | -3.57930901 | 0.000700045 | 0.00379551  |
| 214113_s_at | 0.037016797 | 0.532403339 | 0.596460867 | 0.749045439 |
| 214114_x_at | 0.024094309 | 0.789201555 | 0.433177608 | 0.614024348 |
| 214115_at   | 0.100614331 | 2.127331596 | 0.037614235 | 0.101875971 |
| 214116_at   | 0.076760956 | 2.030689228 | 0.046834761 | 0.121214914 |
| 214117_s_at | 0.160600252 | 3.550522555 | 0.000765996 | 0.004090048 |
| 214118_x_at | 0.082359099 | 2.491189766 | 0.015585726 | 0.050198707 |
| 214119_s_at | -0.83727272 | -7.7725728  | 1.39E-10    | 2.61E-08    |
| 214120_at   | -0.95066618 | -6.95527748 | 3.33E-09    | 2.07E-07    |

|             |             |             |             |             |
|-------------|-------------|-------------|-------------|-------------|
| 214121_x_at | -0.54065447 | -7.2987997  | 8.77E-10    | 8.63E-08    |
| 214122_at   | -0.01405991 | -0.21420896 | 0.831128171 | 0.906545132 |
| 214123_s_at | 0.067681384 | 2.259890959 | 0.027562064 | 0.07951225  |
| 214124_x_at | 0.115971331 | 1.887862861 | 0.06400171  | 0.154773249 |
| 214125_s_at | -0.06078942 | -1.25630142 | 0.213994921 | 0.379533356 |
| 214126_at   | 0.004211694 | 0.136691074 | 0.891743792 | 0.942019989 |
| 214127_s_at | -0.02365049 | -0.51391481 | 0.609245201 | 0.758508784 |
| 214128_at   | -0.01656048 | -0.52808467 | 0.599435886 | 0.751156277 |
| 214129_at   | 0.938631476 | 6.513908633 | 1.84E-08    | 6.97E-07    |
| 214130_s_at | 0.433649568 | 4.766215442 | 1.28E-05    | 0.000131014 |
| 214131_at   | 0.119684012 | 2.032923945 | 0.046601272 | 0.120736466 |
| 214132_at   | 0.163402426 | 4.227978296 | 8.38E-05    | 0.000634131 |
| 214133_at   | -0.02785767 | -0.53705569 | 0.593263728 | 0.746544487 |
| 214134_at   | 0.001885401 | 0.069781177 | 0.944605552 | 0.971451783 |
| 214135_at   | 0.037397852 | 0.995507808 | 0.32358475  | 0.505652086 |
| 214136_at   | 0.03138492  | 1.397861865 | 0.167426776 | 0.319007396 |
| 214137_at   | -0.00325715 | -0.10699914 | 0.915155355 | 0.954807244 |
| 214138_at   | -0.01515663 | -0.37575526 | 0.708456467 | 0.828236997 |
| 214139_at   | -0.03014461 | -0.7841925  | 0.436087476 | 0.616633275 |
| 214140_at   | 0.003297238 | 0.168264129 | 0.866955234 | 0.927980344 |
| 214141_x_at | -0.03884677 | -0.54051381 | 0.5908925   | 0.744815197 |
| 214142_at   | -0.01738492 | -0.33530998 | 0.738589399 | 0.84834329  |
| 214143_x_at | -0.01701472 | -0.39256595 | 0.696065227 | 0.820089706 |
| 214144_at   | 0.006514353 | 0.287981921 | 0.774377253 | 0.87089429  |
| 214145_s_at | -0.44254606 | -6.30513865 | 4.11E-08    | 1.27E-06    |
| 214146_s_at | 0.015119345 | 0.302860248 | 0.763069502 | 0.863704185 |
| 214147_at   | 0.140516099 | 2.673519598 | 0.009710271 | 0.034082417 |
| 214148_at   | 0.047062895 | 1.312265699 | 0.194550449 | 0.354655056 |
| 214149_s_at | 0.201912826 | 3.25922835  | 0.001862804 | 0.008598895 |
| 214150_x_at | 0.439381987 | 5.711910125 | 3.94E-07    | 7.48E-06    |
| 214151_s_at | -0.00459757 | -0.13717044 | 0.891366553 | 0.941856849 |
| 214152_at   | 0.029165788 | 0.917709404 | 0.362534932 | 0.545747406 |
| 214153_at   | 0.156107974 | 3.045273496 | 0.003480899 | 0.014582707 |
| 214154_s_at | -0.04984097 | -1.0448429  | 0.300389051 | 0.479823705 |
| 214155_s_at | -0.03792032 | -1.09153545 | 0.279507508 | 0.456524666 |
| 214156_at   | 0.207362857 | 5.811295628 | 2.71E-07    | 5.48E-06    |
| 214157_at   | -0.10379036 | -0.93705144 | 0.352580282 | 0.535725364 |
| 214158_s_at | -0.02639899 | -0.62683251 | 0.533204993 | 0.700058682 |
| 214159_at   | 0.111205383 | 2.287340801 | 0.025805726 | 0.075607265 |
| 214160_at   | 0.038518709 | 1.392117605 | 0.169150723 | 0.321252078 |
| 214161_at   | 0.026193995 | 0.882253774 | 0.381246421 | 0.564048343 |
| 214162_at   | 0.072459543 | 2.464041034 | 0.016693893 | 0.053120931 |
| 214163_at   | 0.02799045  | 0.85454308  | 0.396286275 | 0.578936526 |
| 214164_x_at | -1.14159336 | -6.87406606 | 4.57E-09    | 2.61E-07    |
| 214165_s_at | 0.015877048 | 0.445732    | 0.657434281 | 0.79265277  |
| 214166_at   | 0.03385591  | 1.050251901 | 0.297916816 | 0.477020125 |
| 214167_s_at | 0.080630718 | 1.320093554 | 0.191940178 | 0.351381647 |
| 214168_s_at | 0.022424013 | 0.308199806 | 0.759023826 | 0.861277937 |
| 214169_at   | -0.01176948 | -0.36058204 | 0.719709218 | 0.835838525 |
| 214170_x_at | -0.17561177 | -2.60410864 | 0.011654885 | 0.039523494 |
| 214171_s_at | -0.0105439  | -0.18979315 | 0.850127504 | 0.917783892 |
| 214172_x_at | 0.169333911 | 4.962628866 | 6.32E-06    | 7.32E-05    |
| 214173_x_at | 0.049429342 | 1.191699091 | 0.23818605  | 0.407714234 |
| 214174_s_at | 0.019957131 | 0.335652478 | 0.738332411 | 0.848157104 |
| 214175_x_at | 0.305087878 | 3.473036344 | 0.000974178 | 0.004986593 |
| 214176_s_at | 0.245367013 | 3.292456358 | 0.00168681  | 0.007902191 |
| 214177_s_at | 0.535315905 | 5.651572781 | 4.95E-07    | 8.97E-06    |
| 214178_s_at | -0.10440657 | -2.04534229 | 0.045321998 | 0.118137896 |
| 214179_s_at | 0.100757096 | 2.372216347 | 0.020986807 | 0.064040857 |
| 214180_at   | 0.229099828 | 3.476512463 | 0.000963786 | 0.004946431 |
| 214181_x_at | 0.116124623 | 2.213129587 | 0.030798406 | 0.086891129 |
| 214182_at   | 0.03588478  | 0.942876882 | 0.349617226 | 0.532682003 |
| 214183_s_at | -0.01078721 | -0.19931006 | 0.842710575 | 0.913604147 |
| 214184_at   | 0.13764519  | 3.351096347 | 0.001413871 | 0.006820153 |
| 214185_at   | 0.014772177 | 0.35282204  | 0.725488537 | 0.839596398 |
| 214186_s_at | -0.04240831 | -1.47719709 | 0.144980323 | 0.287108322 |
| 214187_x_at | -0.05425072 | -1.33125617 | 0.188263718 | 0.346449893 |
| 214188_at   | 0.118147167 | 2.364227795 | 0.021403364 | 0.065089763 |
| 214189_s_at | -0.06538172 | -2.04957966 | 0.044892489 | 0.117274697 |
| 214190_x_at | -0.0686993  | -2.18881466 | 0.032610009 | 0.09101396  |
| 214191_at   | -0.05608015 | -1.55551088 | 0.125212208 | 0.257903217 |
| 214192_at   | 0.178226137 | 3.423960989 | 0.001132721 | 0.005648059 |
| 214193_s_at | -0.0289586  | -0.97759298 | 0.332296623 | 0.514837436 |
| 214194_at   | -0.01682624 | -0.37900048 | 0.7060581   | 0.826765231 |
| 214195_at   | 0.036472635 | 1.242822997 | 0.218885947 | 0.385621678 |

|             |             |             |             |             |
|-------------|-------------|-------------|-------------|-------------|
| 214196_s_at | -0.10929645 | -1.17024533 | 0.246642309 | 0.418296072 |
| 214197_s_at | 0.022616114 | 0.854073691 | 0.39654416  | 0.579095277 |
| 214198_s_at | -0.00096443 | -0.01648121 | 0.986906515 | 0.993620769 |
| 214199_at   | 0.00714527  | 0.181843781 | 0.856333251 | 0.92138209  |
| 214200_s_at | 0.044511456 | 1.235407316 | 0.221611813 | 0.388540079 |
| 214201_x_at | -0.01666162 | -0.29595582 | 0.768310691 | 0.867367419 |
| 214202_at   | 0.224430007 | 5.026702607 | 5.01E-06    | 6.03E-05    |
| 214203_s_at | 0.435909784 | 3.780335622 | 0.00036943  | 0.002214402 |
| 214204_at   | 0.084611014 | 1.128520228 | 0.263701945 | 0.438557933 |
| 214205_x_at | -0.18640941 | -4.47869234 | 3.53E-05    | 0.000308727 |
| 214206_at   | -0.05671601 | -1.34957182 | 0.182347195 | 0.339193409 |
| 214207_s_at | -0.00766754 | -0.17708848 | 0.860049908 | 0.923686119 |
| 214208_at   | 0.014445745 | 0.325786882 | 0.745746785 | 0.852880113 |
| 214209_s_at | -0.28440337 | -4.19929723 | 9.24E-05    | 0.000688255 |
| 214210_at   | 0.000459421 | 0.012656046 | 0.98994522  | 0.995312407 |
| 214211_at   | 0.155522171 | 1.734673042 | 0.08805921  | 0.197707331 |
| 214212_x_at | 0.380488146 | 4.997888746 | 5.56E-06    | 6.57E-05    |
| 214213_x_at | 0.023529182 | 0.385650681 | 0.701152667 | 0.823501785 |
| 214214_s_at | -0.03093661 | -0.30531703 | 0.761207213 | 0.862500581 |
| 214215_s_at | -0.0131315  | -0.41872728 | 0.676947111 | 0.806174597 |
| 214216_s_at | -0.03337171 | -1.0397485  | 0.302730283 | 0.482408251 |
| 214217_at   | -1.09750076 | -7.07531326 | 2.09E-09    | 1.50E-07    |
| 214218_s_at | 0.061537022 | 0.294986961 | 0.769047032 | 0.867753094 |
| 214219_x_at | 0.00839191  | 0.273726471 | 0.785257899 | 0.877537623 |
| 214220_s_at | 0.193296435 | 3.572800915 | 0.000714464 | 0.003860108 |
| 214221_at   | 0.162324271 | 3.553226878 | 0.000759557 | 0.004063457 |
| 214222_at   | 0.356687987 | 3.250890151 | 0.001909609 | 0.008773953 |
| 214223_at   | -0.01122214 | -0.21908481 | 0.827345714 | 0.904195886 |
| 214224_s_at | -0.00018414 | -0.00364615 | 0.997103193 | 0.998640408 |
| 214225_at   | 0.030299888 | 0.984914936 | 0.328717386 | 0.511211327 |
| 214226_at   | -0.0407886  | -0.70528787 | 0.483426874 | 0.658477762 |
| 214227_at   | -0.0750987  | -1.5622103  | 0.123626321 | 0.255319201 |
| 214228_x_at | 0.068245523 | 1.763542422 | 0.083024998 | 0.1888796   |
| 214229_at   | 0.130644935 | 1.693394336 | 0.095693487 | 0.210448445 |
| 214230_at   | -0.34476608 | -3.1894177  | 0.002290426 | 0.010213756 |
| 214231_s_at | -0.0323613  | -1.23785281 | 0.22071015  | 0.387613094 |
| 214232_at   | -0.01981106 | -0.52736208 | 0.59993433  | 0.751549083 |
| 214233_at   | 0.036659758 | 0.952901995 | 0.344556122 | 0.527449981 |
| 214234_s_at | 0.03691316  | 0.881800718 | 0.38148939  | 0.564217481 |
| 214235_at   | -0.02568735 | -0.72549462 | 0.471037759 | 0.647515142 |
| 214236_at   | -0.0062643  | -0.14241133 | 0.887243913 | 0.939445042 |
| 214237_x_at | 0.017947458 | 0.420131703 | 0.675926664 | 0.805337283 |
| 214238_at   | -0.0241231  | -0.64809026 | 0.519459423 | 0.688710748 |
| 214239_x_at | 0.177362496 | 4.548837126 | 2.77E-05    | 0.000250584 |
| 214240_at   | -0.01409426 | -0.38546721 | 0.701287832 | 0.823574621 |
| 214241_at   | 0.14706581  | 2.99331956  | 0.004036538 | 0.016512412 |
| 214242_at   | -0.03725339 | -0.84087508 | 0.403838021 | 0.586175019 |
| 214243_s_at | 0.275520215 | 4.164003648 | 0.000104066 | 0.000762124 |
| 214244_s_at | 0.06933003  | 2.216321651 | 0.030567284 | 0.086380843 |
| 214245_at   | -0.00023921 | -0.00644989 | 0.994875688 | 0.997598928 |
| 214246_x_at | -0.05789397 | -1.22772874 | 0.224460521 | 0.391583637 |
| 214247_s_at | -0.56891794 | -6.41676614 | 2.68E-08    | 9.10E-07    |
| 214248_s_at | -0.03875273 | -0.67315405 | 0.503497018 | 0.675642959 |
| 214249_at   | 0.182039825 | 1.817563305 | 0.074247258 | 0.173295302 |
| 214250_at   | 0.165256242 | 2.830772109 | 0.006353209 | 0.024021796 |
| 214251_s_at | 0.110463231 | 1.391666676 | 0.169286631 | 0.321405291 |
| 214252_s_at | 0.026784648 | 0.962142561 | 0.339933772 | 0.522791471 |
| 214253_s_at | -0.1210738  | -2.38592711 | 0.020288736 | 0.06230634  |
| 214254_at   | 0.013739507 | 0.652486697 | 0.516640206 | 0.686416675 |
| 214255_at   | 0.180228415 | 4.259634517 | 7.52E-05    | 0.000580633 |
| 214256_at   | 0.03397693  | 0.79523667  | 0.429687024 | 0.610625854 |
| 214257_s_at | -0.04695309 | -0.65403254 | 0.515650873 | 0.685801852 |
| 214258_x_at | 0.079499643 | 2.778697093 | 0.007323298 | 0.027024426 |
| 214259_s_at | 0.433629621 | 6.309158996 | 4.05E-08    | 1.26E-06    |
| 214260_at   | -0.17258662 | -3.95313077 | 0.000210322 | 0.001374425 |
| 214261_s_at | 0.010255337 | 0.274076409 | 0.784990278 | 0.877398663 |
| 214262_at   | -0.01100258 | -0.34440827 | 0.73177292  | 0.843495741 |
| 214263_x_at | -0.06827695 | -2.28463092 | 0.025974586 | 0.076007084 |
| 214264_s_at | 0.055252717 | 1.416153792 | 0.162027212 | 0.311160199 |
| 214265_at   | 0.085154605 | 1.544739124 | 0.127796157 | 0.261813699 |
| 214266_s_at | -0.16216541 | -4.30348412 | 6.48E-05    | 0.000510647 |
| 214267_s_at | 0.078883256 | 2.222045306 | 0.030156684 | 0.085469117 |
| 214268_s_at | 0.017026476 | 0.261225137 | 0.794835328 | 0.883376692 |
| 214269_at   | 0.018847402 | 0.452869353 | 0.652316105 | 0.789241103 |
| 214270_s_at | -0.62031044 | -6.42319904 | 2.61E-08    | 8.96E-07    |

|             |             |             |             |             |
|-------------|-------------|-------------|-------------|-------------|
| 214271_x_at | 0.108092342 | 2.076708164 | 0.042225252 | 0.111651342 |
| 214272_at   | -0.0462982  | -1.31009134 | 0.195280229 | 0.35564238  |
| 214273_x_at | 0.10241801  | 2.763151232 | 0.007638291 | 0.027978404 |
| 214274_s_at | 0.441663658 | 5.655594414 | 4.88E-07    | 8.87E-06    |
| 214275_at   | -0.02082003 | -0.57507303 | 0.567444709 | 0.727111333 |
| 214276_at   | 0.012224571 | 0.306937447 | 0.759979684 | 0.86179022  |
| 214277_at   | -0.1098011  | -3.50915508 | 0.000871208 | 0.004542765 |
| 214278_s_at | -0.01208539 | -0.38971131 | 0.698163652 | 0.821286848 |
| 214279_s_at | -0.06102287 | -0.496511   | 0.621392448 | 0.767482091 |
| 214280_x_at | 0.24932592  | 4.131239866 | 0.000116217 | 0.000836791 |
| 214281_s_at | -0.00836323 | -0.11080497 | 0.912149858 | 0.953563694 |
| 214282_at   | 0.044637023 | 1.601448364 | 0.114658339 | 0.241325727 |
| 214283_at   | 0.001878933 | 0.060370914 | 0.952065764 | 0.97546362  |
| 214284_s_at | -0.01036169 | -0.26568193 | 0.791417201 | 0.881210264 |
| 214285_at   | -0.07306503 | -1.86062672 | 0.06781959  | 0.16181694  |
| 214286_at   | -0.05492753 | -1.51001895 | 0.136415311 | 0.274699156 |
| 214287_s_at | 0.062216336 | 1.904979516 | 0.061696739 | 0.150321683 |
| 214288_s_at | 0.020029508 | 0.295144971 | 0.768926929 | 0.867734321 |
| 214289_at   | 0.033767004 | 0.910227413 | 0.366433617 | 0.549588939 |
| 214290_s_at | 0.424330941 | 2.753821679 | 0.00783326  | 0.028580624 |
| 214291_at   | 0.18867437  | 3.290952013 | 0.001694426 | 0.007931171 |
| 214292_at   | 0.258128156 | 4.338118716 | 5.75E-05    | 0.000463137 |
| 214293_at   | -0.50273842 | -6.87484756 | 4.55E-09    | 2.60E-07    |
| 214294_at   | 0.023313843 | 0.507269225 | 0.613870807 | 0.762037506 |
| 214295_at   | 0.642437479 | 8.06065428  | 4.54E-11    | 1.37E-08    |
| 214296_x_at | 0.104457602 | 1.751639951 | 0.085070801 | 0.192564033 |
| 214297_at   | 0.169311477 | 4.4751619   | 3.58E-05    | 0.000311695 |
| 214298_x_at | 0.08304888  | 1.718932288 | 0.090908793 | 0.202456438 |
| 214299_at   | 0.035671386 | 1.261876102 | 0.2119958   | 0.37703515  |
| 214300_s_at | -0.06087656 | -1.27710146 | 0.206606462 | 0.370130918 |
| 214301_s_at | 0.017366533 | 0.431885436 | 0.667410568 | 0.799734016 |
| 214302_x_at | -0.00784865 | -0.19718713 | 0.84436385  | 0.914420596 |
| 214303_x_at | 0.028147458 | 0.684673517 | 0.496250682 | 0.669396218 |
| 214304_x_at | -0.00613836 | -0.22310612 | 0.824229251 | 0.902389792 |
| 214305_s_at | 0.219370343 | 3.19705166  | 0.002239523 | 0.01003111  |
| 214306_at   | -0.39033307 | -4.11318379 | 0.000123488 | 0.000881619 |
| 214307_at   | -0.01072011 | -0.4040998  | 0.687611211 | 0.813717851 |
| 214308_s_at | -0.06187637 | -1.17991811 | 0.242803316 | 0.413479873 |
| 214309_s_at | -0.03613183 | -0.94077762 | 0.350683122 | 0.533848698 |
| 214310_s_at | -0.07778234 | -2.47290088 | 0.016324683 | 0.052139123 |
| 214311_at   | -0.04436029 | -0.72429056 | 0.471770921 | 0.648072356 |
| 214312_at   | -0.00765088 | -0.22270693 | 0.824538492 | 0.9026178   |
| 214313_s_at | -0.0059954  | -0.27401426 | 0.785037809 | 0.877429845 |
| 214314_s_at | 0.185833911 | 4.495579831 | 3.33E-05    | 0.00029296  |
| 214315_x_at | 0.089329956 | 1.073596232 | 0.287407306 | 0.465560252 |
| 214316_x_at | -0.05177139 | -0.73059654 | 0.467938328 | 0.645008165 |
| 214317_x_at | 0.108697453 | 3.067737555 | 0.00326349  | 0.013789533 |
| 214318_s_at | -0.2538803  | -6.38322123 | 3.05E-08    | 1.01E-06    |
| 214319_at   | -0.02612706 | -0.79452086 | 0.430100153 | 0.610999238 |
| 214320_x_at | 0.029426662 | 0.747676786 | 0.457646816 | 0.636378424 |
| 214321_at   | -0.06731713 | -1.76873513 | 0.082145371 | 0.187298653 |
| 214322_at   | 0.276271575 | 6.416774198 | 2.68E-08    | 9.10E-07    |
| 214323_s_at | 0.202718841 | 2.744035047 | 0.008042687 | 0.029223072 |
| 214324_at   | 0.025302513 | 0.622842377 | 0.535805951 | 0.702112225 |
| 214325_at   | -0.0131656  | -0.28536831 | 0.776368791 | 0.871933867 |
| 214326_x_at | -0.10380115 | -1.9976874  | 0.050402167 | 0.128278681 |
| 214327_x_at | 0.046499272 | 1.47126081  | 0.146573624 | 0.289302142 |
| 214328_s_at | 0.070169668 | 1.279034569 | 0.205929562 | 0.369347619 |
| 214329_x_at | 0.035553412 | 1.042771666 | 0.30133943  | 0.480912077 |
| 214330_at   | -0.06590865 | -2.0857965  | 0.041362985 | 0.109760986 |
| 214331_at   | -0.08617386 | -1.61860792 | 0.110905065 | 0.23536488  |
| 214332_s_at | -0.13127297 | -2.90946453 | 0.005110258 | 0.020063923 |
| 214333_x_at | -0.15877178 | -4.00220824 | 0.000178827 | 0.001198943 |
| 214334_x_at | 0.284597269 | 5.683927945 | 4.38E-07    | 8.16E-06    |
| 214335_at   | 0.020748669 | 0.398603275 | 0.691635109 | 0.816767243 |
| 214336_s_at | -0.20396    | -3.31048761 | 0.001597994 | 0.007555344 |
| 214337_at   | -0.00634671 | -0.36272877 | 0.718113303 | 0.83497705  |
| 214338_at   | -0.01155363 | -0.25842651 | 0.7969838   | 0.884829213 |
| 214339_s_at | 0.018739863 | 0.442300036 | 0.659901231 | 0.794377405 |
| 214340_at   | -0.02095727 | -0.46423003 | 0.644204007 | 0.783891459 |
| 214341_at   | -0.02009349 | -0.51739321 | 0.606830442 | 0.756582774 |
| 214342_at   | -0.04132494 | -1.17226273 | 0.245838051 | 0.417280448 |
| 214343_s_at | -0.08393314 | -2.71416887 | 0.008713992 | 0.031188495 |
| 214344_at   | -0.14224971 | -3.58796341 | 0.000681299 | 0.003711888 |
| 214345_at   | -0.06920321 | -1.23054359 | 0.223413125 | 0.39056442  |

|             |             |             |             |             |
|-------------|-------------|-------------|-------------|-------------|
| 214346_at   | 0.039627078 | 1.322780861 | 0.191050188 | 0.350064163 |
| 214347_s_at | 0.029423661 | 0.989426078 | 0.326524988 | 0.50877017  |
| 214348_at   | -0.0787501  | -1.64027523 | 0.106308632 | 0.22788361  |
| 214349_at   | 0.087064306 | 0.902220173 | 0.370635593 | 0.553865179 |
| 214350_at   | -0.05590071 | -1.10663882 | 0.272974936 | 0.448964512 |
| 214351_x_at | 0.071065464 | 1.77578606  | 0.080963387 | 0.185388651 |
| 214352_s_at | 0.19258906  | 3.052636015 | 0.003408197 | 0.014314362 |
| 214353_at   | 0.098419953 | 2.400459086 | 0.019571602 | 0.060528271 |
| 214354_x_at | 0.003648901 | 0.080801142 | 0.935875589 | 0.966652402 |
| 214355_x_at | -0.01541306 | -0.32213863 | 0.74849476  | 0.854930684 |
| 214356_s_at | -0.27911321 | -3.27643514 | 0.001769613 | 0.00823057  |
| 214357_at   | -0.02998231 | -0.4457395  | 0.657428891 | 0.79265277  |
| 214358_at   | 0.050451623 | 1.898372452 | 0.062577974 | 0.152046208 |
| 214359_s_at | -0.24857469 | -2.33273894 | 0.023118146 | 0.069258358 |
| 214360_at   | 0.006222056 | 0.134498294 | 0.893469715 | 0.942985632 |
| 214361_s_at | -0.15132354 | -3.87811044 | 0.000269005 | 0.001694007 |
| 214362_at   | -0.02925721 | -0.91188066 | 0.36556985  | 0.548882877 |
| 214363_s_at | -0.1545796  | -3.25255561 | 0.001900173 | 0.008738682 |
| 214364_at   | -0.07843843 | -2.2040729  | 0.031462557 | 0.088452199 |
| 214365_at   | -0.23927357 | -5.61235277 | 5.74E-07    | 1.01E-05    |
| 214366_s_at | -0.00531379 | -0.13290005 | 0.894728011 | 0.943783829 |
| 214367_at   | 0.032976881 | 0.926445787 | 0.358016468 | 0.541013423 |
| 214368_at   | -0.09499055 | -1.45102319 | 0.152108829 | 0.297169426 |
| 214369_s_at | -0.35622515 | -6.60603239 | 1.29E-08    | 5.44E-07    |
| 214370_at   | 0.039177911 | 1.143393618 | 0.257527456 | 0.431244457 |
| 214371_at   | -0.03787318 | -1.08686947 | 0.281547525 | 0.458799446 |
| 214372_x_at | 0.025300734 | 0.599816372 | 0.550942347 | 0.713706203 |
| 214373_at   | 0.194027477 | 3.292829154 | 0.001684927 | 0.007898339 |
| 214374_s_at | 0.115226723 | 2.79860458  | 0.006937385 | 0.025854369 |
| 214375_at   | 0.352899236 | 5.705574911 | 4.04E-07    | 7.63E-06    |
| 214376_at   | -0.21289969 | -3.36786736 | 0.001343843 | 0.0065335   |
| 214377_s_at | -0.04289208 | -0.83338774 | 0.408012089 | 0.59022426  |
| 214378_at   | -0.02140435 | -0.70509302 | 0.483547214 | 0.658621604 |
| 214379_at   | 0.043809518 | 1.108027222 | 0.272379839 | 0.448351802 |
| 214380_at   | 0.001702896 | 0.033942356 | 0.973038535 | 0.986372039 |
| 214381_at   | -0.02291066 | -0.66371424 | 0.509477615 | 0.680440294 |
| 214382_at   | -0.0271847  | -0.6246778  | 0.534608723 | 0.701201298 |
| 214383_x_at | -0.48691448 | -6.91538416 | 3.89E-09    | 2.32E-07    |
| 214384_s_at | -0.07479871 | -2.08078144 | 0.041836885 | 0.110788294 |
| 214385_s_at | -0.00195715 | -0.07722075 | 0.938711141 | 0.967994423 |
| 214386_at   | 0.02408187  | 0.563676187 | 0.575126601 | 0.732649946 |
| 214387_x_at | 0.058301945 | 1.401322124 | 0.166394849 | 0.317564735 |
| 214388_at   | 0.045110078 | 2.007487566 | 0.049319175 | 0.126132909 |
| 214389_at   | 0.001386987 | 0.072897958 | 0.942135714 | 0.969988442 |
| 214390_s_at | -0.11608365 | -2.78986643 | 0.00710441  | 0.026371288 |
| 214391_x_at | 0.051063351 | 1.033466145 | 0.305634569 | 0.485651004 |
| 214392_at   | 0.017935558 | 0.547705396 | 0.585975619 | 0.741053529 |
| 214393_at   | 0.19947041  | 3.96469096  | 0.000202454 | 0.001330209 |
| 214394_x_at | 0.478251592 | 8.068796405 | 4.40E-11    | 1.36E-08    |
| 214395_x_at | 0.032797832 | 0.797170589 | 0.428572042 | 0.60979136  |
| 214396_s_at | 0.032250828 | 0.84935356  | 0.399143198 | 0.581480225 |
| 214397_at   | -0.01190892 | -0.47086231 | 0.639488159 | 0.78083178  |
| 214398_s_at | -0.03878332 | -0.99097811 | 0.325772967 | 0.507952602 |
| 214399_s_at | 0.027891817 | 0.767004321 | 0.446159947 | 0.62610938  |
| 214400_at   | 0.024025614 | 0.813675732 | 0.419126615 | 0.60147085  |
| 214401_at   | 0.072947271 | 2.354988225 | 0.021894352 | 0.066303183 |
| 214402_s_at | 0.074532867 | 2.132371237 | 0.037180189 | 0.100919219 |
| 214403_x_at | 0.024953628 | 0.652028238 | 0.516933813 | 0.686547621 |
| 214404_x_at | 0.0551342   | 1.200200246 | 0.234893953 | 0.40381123  |
| 214405_at   | 0.004170051 | 0.071090044 | 0.943568296 | 0.970855038 |
| 214406_s_at | -0.00774619 | -0.15986305 | 0.873539034 | 0.931969599 |
| 214407_x_at | -0.04299002 | -0.93210018 | 0.35511147  | 0.538225042 |
| 214408_s_at | -0.23198988 | -6.4133632  | 2.71E-08    | 9.20E-07    |
| 214409_at   | 0.006007142 | 0.153759982 | 0.878327587 | 0.934828889 |
| 214410_at   | -0.07248455 | -1.99500408 | 0.050702236 | 0.128895582 |
| 214411_x_at | -0.05110297 | -1.29783982 | 0.199430733 | 0.361023912 |
| 214412_at   | 0.063681469 | 1.760063732 | 0.083618645 | 0.189879554 |
| 214413_at   | -0.00922492 | -0.29041314 | 0.772526059 | 0.869852744 |
| 214414_x_at | 0.014366164 | 0.057337435 | 0.954471578 | 0.976618516 |
| 214415_at   | -0.00725404 | -0.13350311 | 0.894253192 | 0.943550385 |
| 214416_at   | -0.02158031 | -0.71027274 | 0.4803538   | 0.655663169 |
| 214417_s_at | 0.024224835 | 0.727444813 | 0.469851644 | 0.646588547 |
| 214418_at   | -0.01610826 | -0.38172156 | 0.704049401 | 0.825536486 |
| 214419_s_at | 0.025295811 | 0.724204274 | 0.471823488 | 0.648103957 |
| 214420_s_at | 0.003600285 | 0.11271962  | 0.910638324 | 0.952869107 |



|             |             |             |             |             |
|-------------|-------------|-------------|-------------|-------------|
| 214421_x_at | -0.05144714 | -0.83484854 | 0.407195657 | 0.589555148 |
| 214422_at   | 0.031148413 | 1.313848824 | 0.194020398 | 0.3540694   |
| 214423_x_at | -0.01710792 | -0.57378391 | 0.56831109  | 0.727659626 |
| 214424_s_at | 0.007286268 | 0.328822992 | 0.74346242  | 0.851293138 |
| 214425_at   | -0.03840785 | -1.13905826 | 0.259316506 | 0.433377208 |
| 214426_x_at | -0.01313812 | -0.31931092 | 0.750626932 | 0.856490473 |
| 214427_at   | 0.05390152  | 1.069341807 | 0.289303265 | 0.46761474  |
| 214428_x_at | 0.962838708 | 6.109862317 | 8.70E-08    | 2.26E-06    |
| 214429_at   | -0.25188834 | -3.05348217 | 0.003399933 | 0.014282338 |
| 214430_at   | 0.110633419 | 2.684345881 | 0.009435219 | 0.033292184 |
| 214431_at   | 0.016064569 | 0.511350821 | 0.611027959 | 0.759910962 |
| 214432_at   | -1.04414529 | -5.88452479 | 2.05E-07    | 4.41E-06    |
| 214433_s_at | 0.525190465 | 5.003896081 | 5.44E-06    | 6.45E-05    |
| 214434_at   | -0.53028949 | -7.18818834 | 1.35E-09    | 1.14E-07    |
| 214435_x_at | 0.029241249 | 0.747402371 | 0.457811125 | 0.636526095 |
| 214436_at   | -0.28010761 | -6.20978202 | 5.93E-08    | 1.68E-06    |
| 214437_s_at | 0.065789857 | 1.641418632 | 0.106070443 | 0.227611099 |
| 214438_at   | 0.156083344 | 3.964243198 | 0.000202754 | 0.001331785 |
| 214439_x_at | 0.293286312 | 3.599203835 | 0.000657666 | 0.003603776 |
| 214440_at   | 0.043067513 | 1.588026582 | 0.117664962 | 0.246043256 |
| 214441_at   | -0.06687493 | -1.73442038 | 0.088104359 | 0.19777789  |
| 214442_s_at | -0.30225005 | -7.55126038 | 3.28E-10    | 4.52E-08    |
| 214443_at   | -0.09331671 | -2.89728078 | 0.005286674 | 0.020633311 |
| 214444_s_at | -0.04331214 | -1.1433261  | 0.257555253 | 0.431244457 |
| 214445_at   | 0.009842255 | 0.311372545 | 0.756623098 | 0.85997303  |
| 214446_at   | 0.001580271 | 0.024995125 | 0.980143823 | 0.99002368  |
| 214447_at   | -0.00095182 | -0.02345429 | 0.981367629 | 0.990588176 |
| 214448_x_at | 0.077726933 | 2.870794661 | 0.005689816 | 0.021917709 |
| 214449_s_at | -0.08945415 | -2.05055351 | 0.044794276 | 0.117079699 |
| 214450_at   | -0.01188421 | -0.30697985 | 0.759947572 | 0.86177912  |
| 214451_at   | 0.019139934 | 0.678046229 | 0.500412602 | 0.672938558 |
| 214452_at   | -0.09552554 | -2.83767439 | 0.006233929 | 0.023656854 |
| 214453_s_at | 0.152167614 | 2.286066972 | 0.02588498  | 0.075794505 |
| 214454_at   | 0.035004437 | 0.627030974 | 0.533075797 | 0.699984124 |
| 214455_at   | 0.04899684  | 1.861479009 | 0.067697268 | 0.161645899 |
| 214456_x_at | 0.040581847 | 0.606986312 | 0.546206056 | 0.71022202  |
| 214457_at   | -0.0100978  | -0.27776016 | 0.782174663 | 0.875499651 |
| 214458_at   | 0.044170858 | 1.552407151 | 0.125952416 | 0.259200874 |
| 214459_x_at | 0.261371206 | 3.094281757 | 0.00302296  | 0.012924723 |
| 214460_at   | 0.008259059 | 0.197960575 | 0.843761431 | 0.91423342  |
| 214461_at   | 0.012381893 | 0.355437186 | 0.723539075 | 0.838351286 |
| 214462_at   | 0.036170976 | 0.711853769 | 0.479381416 | 0.654793999 |
| 214463_x_at | 0.004024129 | 0.083708177 | 0.933573924 | 0.965452861 |
| 214464_at   | 0.206873665 | 2.469888323 | 0.01644939  | 0.05246618  |
| 214465_at   | 0.017618262 | 0.461775376 | 0.645953121 | 0.785161905 |
| 214466_at   | 0.015991234 | 0.661777175 | 0.510709543 | 0.681535709 |
| 214467_at   | 0.038890249 | 1.566816386 | 0.122545327 | 0.253622921 |
| 214468_at   | 0.029218578 | 1.395695453 | 0.168075355 | 0.319820487 |
| 214469_at   | 0.085600004 | 2.715611099 | 0.00868043  | 0.031097857 |
| 214470_at   | 0.082327904 | 1.574436155 | 0.120773703 | 0.250765712 |
| 214471_x_at | 0.023881984 | 0.389907704 | 0.698019208 | 0.821203392 |
| 214472_at   | 0.14806814  | 4.133710606 | 0.000115255 | 0.000830851 |
| 214473_x_at | -0.08857493 | -1.36641536 | 0.177032037 | 0.332028865 |
| 214474_at   | -0.04524477 | -0.95449789 | 0.343754892 | 0.526583698 |
| 214475_x_at | 0.082325619 | 0.480419396 | 0.632718892 | 0.775894436 |
| 214476_at   | 0.037770524 | 0.792216318 | 0.431431834 | 0.612326574 |
| 214477_at   | -0.01832898 | -0.59097637 | 0.556810228 | 0.71890691  |
| 214478_at   | 0.003010642 | 0.08061923  | 0.936019638 | 0.96673563  |
| 214479_at   | -0.01232888 | -0.30333718 | 0.762707871 | 0.863563011 |
| 214480_at   | 0.016746085 | 0.390718341 | 0.69742312  | 0.820977561 |
| 214481_at   | -0.01446325 | -0.44084404 | 0.660948973 | 0.795186341 |
| 214482_at   | 0.011083744 | 0.33390589  | 0.739643245 | 0.848943283 |
| 214483_s_at | -0.00370929 | -0.08788674 | 0.930266517 | 0.963666671 |
| 214484_s_at | 0.020071486 | 0.631832156 | 0.529955258 | 0.697266851 |
| 214485_at   | -0.03133815 | -0.786372   | 0.434819944 | 0.615493394 |
| 214486_x_at | 0.118275535 | 2.734657844 | 0.008248165 | 0.029829015 |
| 214487_s_at | -0.31855345 | -6.03380592 | 1.16E-07    | 2.84E-06    |
| 214488_at   | 0.00568863  | 0.265586531 | 0.791490323 | 0.881231141 |
| 214489_at   | -0.03612281 | -0.59660689 | 0.553069153 | 0.715565138 |
| 214490_at   | 0.044461763 | 1.165868815 | 0.248393552 | 0.420595765 |
| 214491_at   | -0.00769459 | -0.14793164 | 0.88290485  | 0.937355007 |
| 214492_at   | 0.023096234 | 0.774769035 | 0.441592998 | 0.621929041 |
| 214493_s_at | -0.02328672 | -0.56437325 | 0.574655308 | 0.732425354 |
| 214494_s_at | 0.057751485 | 1.345829924 | 0.183544306 | 0.340636075 |
| 214495_at   | -0.24134615 | -4.54886873 | 2.77E-05    | 0.000250584 |

|             |             |             |             |             |
|-------------|-------------|-------------|-------------|-------------|
| 214496_x_at | 0.141307688 | 2.446935801 | 0.017428047 | 0.055090937 |
| 214497_s_at | -0.00157505 | -0.05157193 | 0.959045286 | 0.979045934 |
| 214498_at   | -0.03574528 | -0.92333899 | 0.359619125 | 0.542737917 |
| 214499_s_at | 0.029279706 | 0.389797525 | 0.698100241 | 0.821255488 |
| 214500_at   | -0.28812816 | -3.26990289 | 0.001804462 | 0.008364796 |
| 214501_s_at | -0.10483772 | -2.73544159 | 0.008230808 | 0.029780705 |
| 214502_at   | 0.011298497 | 0.492769534 | 0.624017902 | 0.769256029 |
| 214503_x_at | -0.01371057 | -0.35683553 | 0.722497429 | 0.837827066 |
| 214504_at   | 0.024444041 | 0.507277162 | 0.613865273 | 0.762037506 |
| 214505_s_at | -0.1991888  | -1.91346179 | 0.060580858 | 0.148168321 |
| 214506_at   | -0.00286122 | -0.04719636 | 0.962517302 | 0.980954649 |
| 214507_s_at | -0.09508233 | -2.08797763 | 0.041158338 | 0.109393305 |
| 214508_x_at | -0.17489701 | -3.44345588 | 0.001067014 | 0.005376815 |
| 214509_at   | 0.015108582 | 0.400964477 | 0.689905417 | 0.8153494   |
| 214510_at   | 0.056790202 | 1.513564825 | 0.13551448  | 0.27342723  |
| 214511_x_at | 0.288807979 | 1.680162993 | 0.098252669 | 0.21468213  |
| 214512_s_at | -0.21566656 | -3.11932574 | 0.002811321 | 0.01216651  |
| 214513_s_at | -0.05718024 | -1.21802925 | 0.228097229 | 0.395580961 |
| 214514_at   | -0.00675909 | -0.21719793 | 0.82880899  | 0.904983529 |
| 214515_at   | -0.00616301 | -0.29151897 | 0.771684491 | 0.869271324 |
| 214516_at   | 0.007187257 | 0.291569969 | 0.771645682 | 0.869271324 |
| 214517_at   | -0.03075564 | -0.75907843 | 0.450850026 | 0.630219861 |
| 214518_at   | 0.049586959 | 1.168613957 | 0.247294056 | 0.419067454 |
| 214519_s_at | 0.036292982 | 1.341970365 | 0.184785307 | 0.342176297 |
| 214520_at   | -0.06583738 | -1.24037414 | 0.219783357 | 0.386638765 |
| 214521_at   | -0.02477997 | -0.68607897 | 0.495370499 | 0.668529114 |
| 214522_x_at | 0.052236372 | 1.71080027  | 0.092410496 | 0.205044678 |
| 214523_at   | -0.04306812 | -0.88929448 | 0.377483101 | 0.560127321 |
| 214524_at   | -0.00751469 | -0.13976193 | 0.88932763  | 0.940719142 |
| 214525_x_at | 0.058919792 | 1.380094631 | 0.172803186 | 0.326288393 |
| 214526_x_at | -0.10435002 | -1.93230524 | 0.058163185 | 0.143448435 |
| 214527_s_at | -0.18570451 | -3.07192181 | 0.003224423 | 0.013650271 |
| 214528_s_at | 0.00163863  | 0.050423157 | 0.959956762 | 0.979506566 |
| 214529_at   | 0.012204824 | 0.358412437 | 0.721323408 | 0.837095525 |
| 214530_x_at | -0.09170932 | -2.19192149 | 0.032373432 | 0.090523638 |
| 214531_s_at | 0.113563456 | 1.739170254 | 0.087258772 | 0.196372882 |
| 214532_x_at | 0.019509337 | 0.569091029 | 0.571470511 | 0.729843975 |
| 214533_at   | -0.01859    | -0.46749788 | 0.641878571 | 0.782399128 |
| 214534_at   | 0.003997106 | 0.094229326 | 0.925248634 | 0.96085822  |
| 214535_s_at | 0.096907001 | 2.111746686 | 0.038984608 | 0.104705534 |
| 214536_at   | 0.013034537 | 0.285980384 | 0.775902265 | 0.871688093 |
| 214537_at   | 0.011111382 | 0.341779389 | 0.733740287 | 0.84485644  |
| 214538_x_at | 0.014934888 | 0.362031221 | 0.718631734 | 0.835316639 |
| 214539_at   | -0.06360841 | -1.25729922 | 0.213636083 | 0.379095894 |
| 214540_at   | 0.006872257 | 0.224538724 | 0.823119685 | 0.901778449 |
| 214541_s_at | 0.081701908 | 1.128027124 | 0.26390843  | 0.438705432 |
| 214542_x_at | 0.027594949 | 0.737624865 | 0.463687642 | 0.64152231  |
| 214543_x_at | 0.011534638 | 0.194265175 | 0.846640527 | 0.915710134 |
| 214544_s_at | 0.079104646 | 2.002302725 | 0.049889618 | 0.127241771 |
| 214545_s_at | -0.08064549 | -1.40655196 | 0.164844513 | 0.315256578 |
| 214546_s_at | 0.039437649 | 0.953943374 | 0.344033152 | 0.526884026 |
| 214547_at   | -0.04277569 | -1.52937513 | 0.131555102 | 0.267508063 |
| 214548_x_at | 0.083447913 | 1.558254824 | 0.124560706 | 0.256904111 |
| 214549_x_at | 0.027672131 | 0.722902006 | 0.472617224 | 0.648816126 |
| 214550_s_at | 0.087423053 | 2.086422499 | 0.04130416  | 0.109630924 |
| 214551_s_at | 0.073725351 | 2.470520441 | 0.016423152 | 0.052397451 |
| 214552_s_at | -0.01740941 | -0.32945264 | 0.742988961 | 0.851078087 |
| 214553_s_at | -1.68213311 | -7.63410893 | 2.38E-10    | 3.62E-08    |
| 214554_at   | 0.008807873 | 0.385639021 | 0.701161257 | 0.823501785 |
| 214555_at   | 0.032758478 | 0.872951887 | 0.386254444 | 0.568874068 |
| 214556_at   | 0.029403908 | 0.532424471 | 0.596446327 | 0.749045439 |
| 214557_at   | -0.0502928  | -2.6012907  | 0.011740849 | 0.039739627 |
| 214558_at   | -0.2569825  | -4.13910387 | 0.000113181 | 0.000817698 |
| 214559_at   | -0.07061307 | -3.31920887 | 0.001556637 | 0.007390061 |
| 214560_at   | -0.07644213 | -1.51127329 | 0.136096104 | 0.274254084 |
| 214561_at   | -0.0113419  | -0.25623371 | 0.798668294 | 0.88590711  |
| 214562_at   | 0.027146388 | 1.214843068 | 0.229301196 | 0.397021891 |
| 214563_at   | 0.004149322 | 0.159194949 | 0.874063008 | 0.932239193 |
| 214564_s_at | -0.10405852 | -1.17572887 | 0.244460646 | 0.415557993 |
| 214565_s_at | -0.07868377 | -1.84612461 | 0.069929692 | 0.165578691 |
| 214566_at   | -0.07539439 | -1.4872805  | 0.142305158 | 0.283310509 |
| 214567_s_at | 0.030602367 | 0.842786474 | 0.402776668 | 0.585128554 |
| 214568_at   | -0.01894257 | -0.37237739 | 0.710956028 | 0.830259911 |
| 214569_at   | -0.04781805 | -1.23862087 | 0.220427523 | 0.387404585 |
| 214570_x_at | 0.060836733 | 1.233181428 | 0.222434857 | 0.389539915 |

|             |             |             |             |             |
|-------------|-------------|-------------|-------------|-------------|
| 214571_at   | 0.009093288 | 0.274117488 | 0.784958864 | 0.877385493 |
| 214572_s_at | -0.02304301 | -0.46802302 | 0.641505208 | 0.782226092 |
| 214574_x_at | 0.1167283   | 2.968875293 | 0.004325596 | 0.017507657 |
| 214575_s_at | -0.01883978 | -0.46146312 | 0.646175767 | 0.785328567 |
| 214576_at   | -0.03128978 | -0.75755285 | 0.45175605  | 0.631111293 |
| 214577_at   | -0.2356412  | -3.64166672 | 0.000575251 | 0.003225736 |
| 214578_s_at | 0.143255141 | 3.161441691 | 0.002486407 | 0.010943717 |
| 214579_at   | -0.04136666 | -0.70015444 | 0.486602931 | 0.661130592 |
| 214580_x_at | -0.10660662 | -2.20114599 | 0.031679874 | 0.088951242 |
| 214581_x_at | -0.11266011 | -1.56057151 | 0.124012763 | 0.255939894 |
| 214582_at   | -0.0845601  | -2.78757659 | 0.007148788 | 0.026507394 |
| 214583_at   | 0.025199441 | 1.000264633 | 0.321297415 | 0.50315859  |
| 214584_x_at | 0.110814285 | 3.101965304 | 0.002956494 | 0.012686665 |
| 214585_s_at | -0.01326588 | -0.52814779 | 0.599392351 | 0.751156277 |
| 214586_at   | 0.14724539  | 1.529313338 | 0.131570396 | 0.267522481 |
| 214587_at   | 0.034754333 | 1.443469341 | 0.154216244 | 0.300105912 |
| 214588_s_at | -0.00978643 | -0.41616191 | 0.67881266  | 0.807600038 |
| 214589_at   | -0.49216747 | -7.20787234 | 1.25E-09    | 1.08E-07    |
| 214590_s_at | -0.03398611 | -1.3632851  | 0.178010768 | 0.333416756 |
| 214591_at   | -0.04438635 | -0.79200025 | 0.431556811 | 0.612387267 |
| 214592_s_at | -0.01804889 | -0.72079795 | 0.473901244 | 0.649948032 |
| 214593_at   | -0.03972915 | -2.13803328 | 0.036697761 | 0.099905121 |
| 214594_x_at | 0.444243409 | 5.348315458 | 1.54E-06    | 2.28E-05    |
| 214595_at   | 0.039880756 | 0.864862736 | 0.390642874 | 0.573447571 |
| 214596_at   | -0.49057716 | -6.84795188 | 5.05E-09    | 2.80E-07    |
| 214597_at   | -0.18304577 | -3.2336796  | 0.002009741 | 0.009144936 |
| 214598_at   | 0.032056774 | 1.165823371 | 0.248411783 | 0.420610699 |
| 214599_at   | -0.02756529 | -0.48715559 | 0.627966502 | 0.772482973 |
| 214600_at   | 0.115061864 | 2.923388748 | 0.004915329 | 0.019447229 |
| 214601_at   | -0.00940973 | -0.52976408 | 0.598278164 | 0.750399857 |
| 214602_at   | 0.017106715 | 0.515652171 | 0.608038548 | 0.757602911 |
| 214603_at   | -0.00205755 | -0.11503944 | 0.908807376 | 0.951712239 |
| 214604_at   | -0.0156123  | -0.47880473 | 0.633860364 | 0.776710727 |
| 214605_x_at | 0.091942539 | 3.131406266 | 0.002714269 | 0.011811695 |
| 214606_at   | -0.00728053 | -0.36355137 | 0.717502105 | 0.83463311  |
| 214607_at   | -0.45302155 | -4.81968289 | 1.06E-05    | 0.000111845 |
| 214608_s_at | -0.81996559 | -7.71459236 | 1.74E-10    | 2.98E-08    |
| 214609_at   | 0.010889969 | 0.336438042 | 0.737743091 | 0.847806999 |
| 214610_at   | 0.033920758 | 1.169021977 | 0.247130933 | 0.41888638  |
| 214611_at   | -0.01288235 | -0.41426874 | 0.68019068  | 0.808421718 |
| 214612_x_at | 0.001450805 | 0.055549029 | 0.955890142 | 0.977324608 |
| 214613_at   | -0.06539532 | -1.48706967 | 0.142360692 | 0.283377162 |
| 214614_at   | 0.017418376 | 0.41903694  | 0.67672206  | 0.806013972 |
| 214615_at   | -9.93E-05   | -0.00343632 | 0.997269896 | 0.998706655 |
| 214616_at   | 0.023925527 | 0.449825506 | 0.654496804 | 0.79062983  |
| 214617_at   | 0.062002949 | 1.738845996 | 0.087316283 | 0.19648252  |
| 214618_at   | -0.0300993  | -0.69190052 | 0.491733812 | 0.665735852 |
| 214619_at   | -0.03108636 | -0.57999777 | 0.564140917 | 0.724666183 |
| 214620_x_at | -0.47575938 | -6.5049863  | 1.91E-08    | 7.13E-07    |
| 214621_at   | -0.05787921 | -1.27794963 | 0.206309263 | 0.369736957 |
| 214622_at   | 0.02809514  | 0.871921665 | 0.386811626 | 0.569531164 |
| 214623_at   | 6.93E-05    | 0.001910554 | 0.998482093 | 0.999219904 |
| 214624_at   | -0.00414536 | -0.07912087 | 0.937206211 | 0.967374871 |
| 214625_s_at | -0.22683444 | -4.33509502 | 5.81E-05    | 0.000466798 |
| 214626_s_at | 0.061448272 | 1.749732952 | 0.085402432 | 0.193138625 |
| 214627_at   | -0.00641772 | -0.13713282 | 0.891396159 | 0.941856849 |
| 214628_at   | -0.13771853 | -3.04334466 | 0.003500183 | 0.014639022 |
| 214629_x_at | -0.24463373 | -3.33989745 | 0.001462538 | 0.007017044 |
| 214630_at   | -0.05180669 | -0.79408744 | 0.430350417 | 0.611238189 |
| 214631_at   | -0.00133008 | -0.08101503 | 0.935706225 | 0.966578766 |
| 214632_at   | -0.01800972 | -0.46768514 | 0.641745423 | 0.782369581 |
| 214633_at   | 0.209596464 | 6.502960956 | 1.92E-08    | 7.17E-07    |
| 214634_at   | -0.01553611 | -0.33018833 | 0.742435894 | 0.850749833 |
| 214635_at   | 0.004004951 | 0.098984572 | 0.921488547 | 0.958834365 |
| 214636_at   | 0.02387299  | 0.693980443 | 0.490438073 | 0.664644864 |
| 214637_at   | 0.064640784 | 2.130525435 | 0.037338651 | 0.101248339 |
| 214638_s_at | 0.029634177 | 1.267474026 | 0.210002306 | 0.374622722 |
| 214639_s_at | -0.01815311 | -0.41058259 | 0.682876932 | 0.81042955  |
| 214640_at   | 0.013194214 | 0.657095515 | 0.513693555 | 0.684332668 |
| 214641_at   | 0.039857074 | 0.938187337 | 0.352001243 | 0.535284021 |
| 214642_x_at | 0.032488092 | 1.186425638 | 0.24024493  | 0.410201582 |
| 214643_x_at | 0.25979384  | 4.194809985 | 9.38E-05    | 0.000697405 |
| 214644_at   | -0.06676132 | -1.82942746 | 0.072427362 | 0.169997567 |
| 214645_at   | 0.007756697 | 0.338457708 | 0.736228689 | 0.846698041 |
| 214646_at   | -0.02351528 | -0.45662829 | 0.649627296 | 0.787702619 |

|             |             |             |             |             |
|-------------|-------------|-------------|-------------|-------------|
| 214647_s_at | -0.03273419 | -1.2541484  | 0.214770734 | 0.380473696 |
| 214648_at   | -0.06281788 | -1.40913193 | 0.164083825 | 0.314218627 |
| 214649_s_at | -0.04483971 | -1.38274567 | 0.171992672 | 0.325170121 |
| 214650_x_at | 0.055562175 | 0.327396212 | 0.74453564  | 0.852063578 |
| 214651_s_at | 0.002398456 | 0.116321912 | 0.907795377 | 0.951157083 |
| 214652_at   | -1.48813503 | -8.47202971 | 9.25E-12    | 5.30E-09    |
| 214655_at   | -1.89321391 | -9.4004516  | 2.66E-13    | 1.54E-09    |
| 214656_x_at | 0.243125972 | 4.082367463 | 0.000136926 | 0.000960673 |
| 214657_s_at | 0.506117038 | 2.832974794 | 0.006314917 | 0.023903302 |
| 214658_at   | 0.238299923 | 2.537861248 | 0.013834883 | 0.045465689 |
| 214659_x_at | 0.005527566 | 0.089362975 | 0.929098347 | 0.963011186 |
| 214660_at   | 0.043771972 | 2.293324501 | 0.02543631  | 0.074720624 |
| 214661_s_at | 0.100931407 | 2.271059611 | 0.026835076 | 0.077906156 |
| 214662_at   | 0.129386353 | 2.995916572 | 0.004006909 | 0.016418262 |
| 214663_at   | -0.025468   | -0.38243627 | 0.703522154 | 0.825157782 |
| 214664_at   | 0.078340347 | 3.329617594 | 0.001508602 | 0.007195565 |
| 214665_s_at | 0.129368967 | 2.395798925 | 0.019799062 | 0.061092218 |
| 214666_x_at | -0.00491445 | -0.20878132 | 0.835343408 | 0.909040141 |
| 214667_s_at | -0.00307123 | -0.06385901 | 0.949299954 | 0.974035067 |
| 214668_at   | -0.11813973 | -3.10066856 | 0.002967614 | 0.01272217  |
| 214669_x_at | -0.00420528 | -0.09069126 | 0.928047383 | 0.962371656 |
| 214670_at   | -0.01045974 | -0.12978283 | 0.897182971 | 0.944848596 |
| 214671_s_at | -0.17852738 | -2.07186678 | 0.042690922 | 0.112609495 |
| 214672_at   | 0.181053605 | 3.146238946 | 0.0025994   | 0.011373839 |
| 214673_s_at | 0.005829636 | 0.158674084 | 0.874471547 | 0.932452518 |
| 214674_at   | 0.062283153 | 1.700471694 | 0.094347225 | 0.208307784 |
| 214675_at   | 0.107202928 | 3.358222785 | 0.001383703 | 0.006692689 |
| 214676_x_at | -0.01903145 | -0.35585978 | 0.723224227 | 0.83814794  |
| 214677_x_at | 0.113205271 | 1.689057518 | 0.096526208 | 0.211902925 |
| 214678_x_at | 0.06759842  | 3.566504584 | 0.000728683 | 0.003927436 |
| 214679_x_at | -0.0415636  | -0.9576866  | 0.342157636 | 0.525091308 |
| 214680_at   | 0.292045756 | 2.391749201 | 0.019998647 | 0.061563543 |
| 214681_at   | -0.02694633 | -1.30870353 | 0.195747096 | 0.356289779 |
| 214682_at   | 0.196738425 | 2.221739798 | 0.030178477 | 0.085507014 |
| 214683_s_at | 0.556653776 | 4.969330431 | 6.17E-06    | 7.17E-05    |
| 214684_at   | 0.045311553 | 0.773640547 | 0.442255027 | 0.622606365 |
| 214685_at   | -0.00460435 | -0.16551529 | 0.86910844  | 0.929166893 |
| 214686_at   | 0.14341432  | 2.978417218 | 0.004210543 | 0.017121063 |
| 214687_x_at | -0.24859232 | -3.74780457 | 0.000410185 | 0.002424544 |
| 214688_at   | -0.03431309 | -1.39775134 | 0.16745982  | 0.319029552 |
| 214689_at   | -0.01649831 | -0.61804522 | 0.538941617 | 0.704943086 |
| 214690_at   | 0.080247348 | 3.538831754 | 0.000794435 | 0.004206242 |
| 214691_x_at | -0.16797803 | -2.01022984 | 0.049019743 | 0.125525146 |
| 214692_s_at | -0.03288592 | -0.87627245 | 0.384461983 | 0.567055784 |
| 214693_x_at | 0.231735612 | 2.75233006  | 0.007864853 | 0.028679504 |
| 214694_at   | -0.04508374 | -0.86553648 | 0.390276182 | 0.57314092  |
| 214695_at   | -0.07031724 | -1.47810436 | 0.144738014 | 0.286768245 |
| 214696_at   | -0.06658634 | -0.84707332 | 0.400402524 | 0.582797251 |
| 214697_s_at | -0.02839493 | -1.23105521 | 0.223223139 | 0.390369719 |
| 214698_at   | -0.04976298 | -1.35006864 | 0.182188699 | 0.338983236 |
| 214699_x_at | -0.02860492 | -0.74620822 | 0.458526532 | 0.637163975 |
| 214700_x_at | 0.014091211 | 0.353113732 | 0.725271004 | 0.839453337 |
| 214701_s_at | -0.05084911 | -1.04092261 | 0.302189596 | 0.481838718 |
| 214702_at   | -0.03771173 | -1.14398286 | 0.257284978 | 0.430996329 |
| 214703_s_at | -0.35519176 | -5.49756449 | 8.82E-07    | 1.44E-05    |
| 214704_at   | -0.03134721 | -0.69667422 | 0.488762713 | 0.663158663 |
| 214705_at   | -0.04324714 | -2.3940212  | 0.019886454 | 0.061308349 |
| 214706_at   | -0.02862992 | -0.83370907 | 0.407832413 | 0.590075632 |
| 214707_x_at | 0.310823163 | 5.943686528 | 1.64E-07    | 3.70E-06    |
| 214708_at   | 0.133169272 | 3.16710363  | 0.002445516 | 0.010791368 |
| 214709_s_at | 0.290695556 | 4.195497572 | 9.36E-05    | 0.000695898 |
| 214710_s_at | -0.07545135 | -2.15480284 | 0.035300878 | 0.096884477 |
| 214711_at   | 0.012080793 | 0.318671857 | 0.751109076 | 0.856799991 |
| 214712_at   | 0.066235345 | 3.545313522 | 0.000778546 | 0.004142234 |
| 214713_at   | -0.01737093 | -0.44277437 | 0.659560046 | 0.794144554 |
| 214714_at   | 0.065502889 | 1.768865146 | 0.082123446 | 0.187267771 |
| 214715_x_at | 0.429298857 | 6.185701184 | 6.51E-08    | 1.80E-06    |
| 214716_at   | 0.041404973 | 1.488305303 | 0.142035465 | 0.282944016 |
| 214717_at   | -0.35478581 | -5.11801233 | 3.59E-06    | 4.59E-05    |
| 214718_at   | 0.341655698 | 4.608442461 | 2.24E-05    | 0.000210255 |
| 214719_at   | 0.125708065 | 2.839660836 | 0.006199986 | 0.023546339 |
| 214720_x_at | 0.069409592 | 1.244762985 | 0.218176936 | 0.384686036 |
| 214721_x_at | 0.38735252  | 5.213709968 | 2.53E-06    | 3.43E-05    |
| 214722_at   | 0.736958892 | 7.729442548 | 1.64E-10    | 2.87E-08    |
| 214723_x_at | 0.10776036  | 1.640369394 | 0.106289001 | 0.22788361  |

|             |             |             |             |             |
|-------------|-------------|-------------|-------------|-------------|
| 214724_at   | 0.259254722 | 2.398980786 | 0.019643502 | 0.060696032 |
| 214725_at   | -0.02887778 | -1.85828876 | 0.068156093 | 0.162429058 |
| 214726_x_at | -0.14747107 | -2.79060882 | 0.007090077 | 0.026330324 |
| 214727_at   | -0.01132964 | -0.45682963 | 0.649483412 | 0.787570888 |
| 214728_x_at | -0.18823143 | -3.13511162 | 0.002685136 | 0.011702008 |
| 214729_at   | -0.00288511 | -0.14481429 | 0.885354708 | 0.938570915 |
| 214730_s_at | 0.212093846 | 3.909767272 | 0.000242539 | 0.001554506 |
| 214731_at   | 0.00468687  | 0.104581012 | 0.91706562  | 0.955974545 |
| 214732_at   | -0.00423509 | -0.11926348 | 0.905474769 | 0.949918508 |
| 214733_s_at | 0.077316024 | 2.199801182 | 0.031780165 | 0.089190393 |
| 214734_at   | 0.211966029 | 2.876837595 | 0.005595409 | 0.021619265 |
| 214735_at   | -0.50995261 | -5.11590885 | 3.62E-06    | 4.63E-05    |
| 214736_s_at | 0.063414947 | 1.031132965 | 0.30671799  | 0.486922436 |
| 214737_x_at | 0.141133811 | 3.357156569 | 0.001388177 | 0.0067107   |
| 214738_s_at | -0.00393358 | -0.09409491 | 0.925354946 | 0.960860757 |
| 214739_at   | 0.267046108 | 6.792320943 | 6.27E-09    | 3.23E-07    |
| 214740_at   | 0.069330577 | 1.639287951 | 0.106514649 | 0.228193889 |
| 214741_at   | -0.07506614 | -1.59754575 | 0.115526105 | 0.242693689 |
| 214742_at   | 0.064840462 | 2.181991035 | 0.033134948 | 0.09222564  |
| 214743_at   | 0.317939777 | 6.344077679 | 3.54E-08    | 1.13E-06    |
| 214744_s_at | 0.056684592 | 1.736813523 | 0.087677482 | 0.19713649  |
| 214745_at   | 0.150404662 | 2.984461821 | 0.00413914  | 0.016870628 |
| 214746_s_at | -0.33014244 | -5.19363438 | 2.72E-06    | 3.65E-05    |
| 214747_at   | -0.01630988 | -0.46874332 | 0.640993249 | 0.781791135 |
| 214748_at   | 0.09650014  | 2.043723561 | 0.045487012 | 0.118467688 |
| 214749_s_at | 0.318939532 | 6.571687302 | 1.47E-08    | 5.96E-07    |
| 214750_at   | 0.001120739 | 0.021526142 | 0.982899123 | 0.991641329 |
| 214751_at   | 0.036589281 | 1.868616005 | 0.066680247 | 0.159712396 |
| 214752_x_at | 0.302195108 | 4.904480449 | 7.80E-06    | 8.69E-05    |
| 214753_at   | 0.329547117 | 4.856642701 | 9.27E-06    | 0.000100361 |
| 214754_at   | -0.03770637 | -0.76365864 | 0.448136242 | 0.627656676 |
| 214755_at   | 0.1599119   | 4.042246852 | 0.00015655  | 0.001071939 |
| 214756_x_at | -0.10395864 | -2.54750323 | 0.013496167 | 0.04454732  |
| 214757_at   | -0.07698476 | -1.85194272 | 0.069076589 | 0.164106471 |
| 214758_at   | 0.047978297 | 1.121142571 | 0.266803253 | 0.442060471 |
| 214759_at   | 0.012030254 | 0.426581236 | 0.671248339 | 0.801990425 |
| 214760_at   | 0.111086792 | 3.590787775 | 0.000675286 | 0.003684066 |
| 214761_at   | 0.579607402 | 5.530584719 | 7.80E-07    | 1.31E-05    |
| 214762_at   | -0.67776999 | -6.14195559 | 7.69E-08    | 2.05E-06    |
| 214763_at   | 0.056678658 | 1.858007878 | 0.068196616 | 0.162490972 |
| 214764_at   | 0.054183792 | 1.771054714 | 0.081754952 | 0.186684668 |
| 214765_s_at | 0.011870793 | 0.412017203 | 0.681830979 | 0.809768279 |
| 214766_s_at | 0.078637237 | 2.131083455 | 0.037290683 | 0.101146222 |
| 214767_s_at | 0.111142307 | 1.704979587 | 0.093497876 | 0.206851495 |
| 214768_x_at | 0.009556249 | 0.287447666 | 0.774784225 | 0.871045119 |
| 214769_at   | -0.45202097 | -3.99171913 | 0.000185151 | 0.001235039 |
| 214770_at   | 0.076318448 | 2.213055647 | 0.030803778 | 0.086900799 |
| 214771_x_at | -0.04787755 | -0.97221241 | 0.334943242 | 0.517710733 |
| 214772_at   | -0.27765352 | -5.26708278 | 2.08E-06    | 2.92E-05    |
| 214773_x_at | 0.059428137 | 0.708869147 | 0.481217982 | 0.656509479 |
| 214774_x_at | 0.033070868 | 0.822578217 | 0.41408453  | 0.596267497 |
| 214775_at   | -0.03355669 | -1.02739218 | 0.308460481 | 0.488976548 |
| 214776_x_at | 0.004719848 | 0.331300828 | 0.741599815 | 0.85011873  |
| 214777_at   | -0.03661993 | -1.30269843 | 0.197776918 | 0.358785761 |
| 214778_at   | -0.09574654 | -2.03909157 | 0.04596207  | 0.119523847 |
| 214779_s_at | 0.036264839 | 1.159642285 | 0.250900417 | 0.423668774 |
| 214780_s_at | 0.089490077 | 1.871921176 | 0.06621365  | 0.15886726  |
| 214781_at   | -0.10008561 | -1.66228942 | 0.101798496 | 0.220661601 |
| 214782_at   | 0.306274733 | 4.133692102 | 0.000115262 | 0.000830851 |
| 214783_s_at | -0.11014419 | -1.77803947 | 0.080588636 | 0.184755954 |
| 214784_x_at | 0.031858975 | 0.933415393 | 0.354437961 | 0.537540196 |
| 214785_at   | -0.15343074 | -3.27308921 | 0.001787383 | 0.008300186 |
| 214786_at   | -0.01267621 | -0.51809556 | 0.60634339  | 0.756186483 |
| 214787_at   | 0.052895402 | 1.027165183 | 0.308566434 | 0.489034288 |
| 214788_x_at | -1.09644149 | -7.89023202 | 8.79E-11    | 1.96E-08    |
| 214789_x_at | -0.14066491 | -2.48404297 | 0.015870821 | 0.050970014 |
| 214790_at   | 0.162558768 | 2.361739808 | 0.021534598 | 0.0654043   |
| 214791_at   | 0.059061093 | 1.259800989 | 0.212738327 | 0.377949647 |
| 214792_x_at | -0.4089987  | -4.91298776 | 7.57E-06    | 8.47E-05    |
| 214793_at   | -0.07233636 | -1.99402251 | 0.050812385 | 0.129116847 |
| 214794_at   | -0.13909992 | -2.4980252  | 0.015317384 | 0.049491364 |
| 214795_at   | 0.09984082  | 2.570307614 | 0.012724778 | 0.042461115 |
| 214796_at   | -0.0654335  | -2.02246876 | 0.047702365 | 0.122949207 |
| 214797_s_at | 0.434706346 | 3.642414782 | 0.000573891 | 0.00321892  |
| 214798_at   | -0.04260739 | -1.06298315 | 0.29215304  | 0.470605668 |

|             |             |             |             |             |
|-------------|-------------|-------------|-------------|-------------|
| 214799_at   | 0.408172191 | 5.697218643 | 4.17E-07    | 7.82E-06    |
| 214800_x_at | 0.112258729 | 1.741551505 | 0.086837389 | 0.195611724 |
| 214801_at   | 0.164007414 | 4.347970378 | 5.56E-05    | 0.000450765 |
| 214802_at   | -0.01275848 | -0.34440596 | 0.731774646 | 0.843495741 |
| 214803_at   | -0.54673856 | -7.54150379 | 3.41E-10    | 4.61E-08    |
| 214804_at   | 0.03260487  | 1.398849378 | 0.167131776 | 0.318594725 |
| 214805_at   | 0.156120215 | 2.545674011 | 0.013559843 | 0.044714566 |
| 214806_at   | 0.433327513 | 4.925543346 | 7.23E-06    | 8.19E-05    |
| 214807_at   | 0.370389613 | 4.439347577 | 4.05E-05    | 0.000345694 |
| 214808_at   | 0.39304652  | 5.675728565 | 4.52E-07    | 8.34E-06    |
| 214809_at   | -0.0620229  | -1.28796565 | 0.202823688 | 0.36547844  |
| 214811_at   | -0.64486319 | -6.372047   | 3.18E-08    | 1.04E-06    |
| 214812_s_at | 0.275979873 | 4.359477429 | 5.34E-05    | 0.000435969 |
| 214813_at   | 0.000237504 | 0.006966029 | 0.994465632 | 0.997389153 |
| 214814_at   | 0.076449049 | 2.215183895 | 0.030649487 | 0.086574826 |
| 214815_at   | 0.037489256 | 1.447663574 | 0.153043321 | 0.298525318 |
| 214816_x_at | 0.064981601 | 1.299291913 | 0.198935374 | 0.360419157 |
| 214817_at   | -0.14245894 | -1.97121508 | 0.053430258 | 0.13429532  |
| 214818_at   | -0.00906379 | -0.24061778 | 0.810691684 | 0.893755337 |
| 214819_at   | -0.16563367 | -2.70899912 | 0.008835279 | 0.031543881 |
| 214820_at   | -0.03895513 | -1.70972794 | 0.092610036 | 0.205344697 |
| 214821_at   | -0.53591012 | -6.2588668  | 4.91E-08    | 1.45E-06    |
| 214822_at   | 0.045108666 | 0.871358329 | 0.387116512 | 0.569786956 |
| 214823_at   | -0.32884572 | -4.78132762 | 1.21E-05    | 0.000125304 |
| 214824_at   | 0.003072407 | 0.05597322  | 0.955553661 | 0.977177865 |
| 214825_at   | 0.032394678 | 0.782398928 | 0.437132208 | 0.617670892 |
| 214826_at   | -0.00227479 | -0.09577155 | 0.924028965 | 0.960232113 |
| 214827_at   | 0.017242074 | 0.739475635 | 0.462571988 | 0.640557999 |
| 214828_s_at | -0.1442775  | -2.96336511 | 0.00439336  | 0.017732147 |
| 214829_at   | 0.277491706 | 5.219116518 | 2.48E-06    | 3.38E-05    |
| 214830_at   | -0.05918078 | -1.42881362 | 0.158369809 | 0.306003611 |
| 214831_at   | -0.00381484 | -0.06553716 | 0.947969526 | 0.973379399 |
| 214832_at   | 0.037283062 | 0.939812662 | 0.351173786 | 0.534395412 |
| 214833_at   | 0.381455397 | 3.797291572 | 0.000349757 | 0.0021152   |
| 214834_at   | -0.17986898 | -2.89834587 | 0.00527103  | 0.02058124  |
| 214835_s_at | 0.320153884 | 4.425408005 | 4.25E-05    | 0.000360281 |
| 214836_x_at | -0.04181294 | -1.13494912 | 0.261020338 | 0.435313118 |
| 214837_at   | 0.001905644 | 0.071834126 | 0.942978666 | 0.970581114 |
| 214838_at   | 0.033211998 | 0.969848522 | 0.336110392 | 0.518911346 |
| 214839_at   | -0.31311231 | -4.35520747 | 5.42E-05    | 0.00044114  |
| 214840_at   | -0.08091547 | -2.10924248 | 0.03920881  | 0.105149724 |
| 214841_at   | -0.16410124 | -4.33885269 | 5.73E-05    | 0.00046247  |
| 214842_s_at | -0.01333102 | -0.32931413 | 0.743093106 | 0.851131939 |
| 214843_s_at | 0.094522423 | 1.617880936 | 0.111062033 | 0.235598272 |
| 214844_s_at | 0.049884686 | 0.725131193 | 0.471258987 | 0.647647806 |
| 214845_s_at | -0.07498182 | -2.22752125 | 0.029768413 | 0.084594004 |
| 214846_s_at | -4.25E-05   | -0.00116277 | 0.999076196 | 0.999548259 |
| 214847_s_at | 0.001955429 | 0.038801982 | 0.969180231 | 0.984445167 |
| 214848_at   | -0.24301358 | -4.1491981  | 0.000109396 | 0.000794479 |
| 214849_at   | -0.03871809 | -0.99270796 | 0.324936142 | 0.5071078   |
| 214850_at   | 0.480538395 | 4.061900547 | 0.00014662  | 0.001015455 |
| 214851_at   | 0.055213692 | 1.420420901 | 0.160787214 | 0.309443724 |
| 214852_x_at | -0.11824829 | -3.8806968  | 0.000266742 | 0.001682605 |
| 214853_s_at | 0.450258452 | 4.389239516 | 4.82E-05    | 0.000398956 |
| 214854_at   | -0.0299857  | -0.82126253 | 0.414827369 | 0.597031677 |
| 214855_s_at | -0.10180889 | -1.21708953 | 0.228451841 | 0.395973033 |
| 214856_at   | 0.00902948  | 0.301136614 | 0.764376889 | 0.86456437  |
| 214857_at   | -0.10778283 | -2.52556457 | 0.01427802  | 0.046594618 |
| 214858_at   | -0.07158554 | -2.11694328 | 0.038522915 | 0.103751157 |
| 214859_at   | -0.03576026 | -1.14243486 | 0.257922346 | 0.431692962 |
| 214860_at   | -0.44225421 | -7.19085821 | 1.33E-09    | 1.13E-07    |
| 214861_at   | 0.029858957 | 0.921494383 | 0.360572858 | 0.543719845 |
| 214862_x_at | 0.105446378 | 3.726672239 | 0.00043893  | 0.002563935 |
| 214863_at   | -0.005328   | -0.11754544 | 0.906830039 | 0.950470172 |
| 214864_s_at | 0.14149383  | 2.382129286 | 0.020479988 | 0.062759985 |
| 214865_at   | -0.01012538 | -0.35340346 | 0.725054957 | 0.83931196  |
| 214866_at   | -0.02257985 | -0.43616523 | 0.664320474 | 0.797534333 |
| 214867_at   | 0.126002806 | 3.177843106 | 0.002369682 | 0.010508614 |
| 214868_at   | -0.03098545 | -1.39650705 | 0.167832154 | 0.319507353 |
| 214869_x_at | -0.02073141 | -0.51598374 | 0.60780839  | 0.757400601 |
| 214870_x_at | 0.102583711 | 2.213825633 | 0.030747878 | 0.086797132 |
| 214871_x_at | 0.03542941  | 1.356242978 | 0.180227699 | 0.33644238  |
| 214872_at   | -0.00196863 | -0.06218023 | 0.950631033 | 0.974686323 |
| 214873_at   | 0.031858778 | 1.390169587 | 0.169738447 | 0.322052671 |
| 214874_at   | -0.82832978 | -7.31786824 | 8.14E-10    | 8.27E-08    |

|             |             |             |             |             |
|-------------|-------------|-------------|-------------|-------------|
| 214875_x_at | -0.24310547 | -4.67293933 | 1.79E-05    | 0.000173364 |
| 214876_s_at | -0.02164748 | -0.64762621 | 0.51975747  | 0.689022065 |
| 214877_at   | 0.025657147 | 0.534754634 | 0.594844028 | 0.747813085 |
| 214878_at   | -0.03696521 | -1.65829937 | 0.102604162 | 0.221954754 |
| 214879_x_at | 0.013032856 | 0.327160295 | 0.744713146 | 0.852130241 |
| 214880_x_at | 0.018269188 | 0.443101414 | 0.659324846 | 0.794066434 |
| 214881_s_at | 0.039006532 | 1.160421409 | 0.250585746 | 0.423233369 |
| 214882_s_at | -0.06111231 | -0.75311021 | 0.45440049  | 0.633538191 |
| 214883_at   | 0.019733007 | 0.546958764 | 0.586485184 | 0.74149752  |
| 214884_at   | -0.02004889 | -0.68933541 | 0.493334408 | 0.667028291 |
| 214885_at   | -0.0299606  | -0.58497628 | 0.560810735 | 0.722277553 |
| 214886_s_at | 0.001533906 | 0.042003873 | 0.966638485 | 0.983103056 |
| 214887_at   | -0.00518833 | -0.26102239 | 0.794990924 | 0.88345064  |
| 214888_at   | 0.116983397 | 2.327485624 | 0.023415844 | 0.070009426 |
| 214889_at   | -0.64989475 | -7.11577478 | 1.79E-09    | 1.35E-07    |
| 214890_s_at | -0.56799679 | -6.43563007 | 2.49E-08    | 8.61E-07    |
| 214891_at   | 0.003190274 | 0.076497451 | 0.939284071 | 0.968323538 |
| 214892_x_at | -0.02611325 | -0.70448037 | 0.48392571  | 0.658936318 |
| 214893_x_at | -0.24417731 | -4.1441243  | 0.000111283 | 0.000805941 |
| 214894_x_at | 0.311947096 | 4.922845779 | 7.30E-06    | 8.25E-05    |
| 214895_s_at | -0.11010682 | -1.47656611 | 0.145149029 | 0.287353284 |
| 214896_at   | -0.15139505 | -3.08172343 | 0.003134613 | 0.013328143 |
| 214897_at   | 0.03690155  | 1.479540008 | 0.14435524  | 0.286276375 |
| 214898_x_at | -0.03635154 | -0.70010774 | 0.486631879 | 0.661130592 |
| 214899_at   | -0.04429039 | -2.20574994 | 0.031338633 | 0.088175973 |
| 214900_at   | 0.003539324 | 0.087420188 | 0.930635744 | 0.963825752 |
| 214901_at   | 0.055842557 | 1.238599471 | 0.220435393 | 0.387404585 |
| 214902_x_at | 0.28088992  | 5.138904706 | 3.33E-06    | 4.30E-05    |
| 214903_at   | -0.46113948 | -7.96809462 | 6.50E-11    | 1.65E-08    |
| 214904_at   | -0.0324957  | -1.32447641 | 0.190490255 | 0.349340116 |
| 214905_at   | -0.08544967 | -2.12461265 | 0.03785024  | 0.102386693 |
| 214906_x_at | -0.13881911 | -3.0433066  | 0.003500564 | 0.014639022 |
| 214907_at   | -0.02861935 | -0.57263555 | 0.569083415 | 0.728064465 |
| 214908_s_at | -0.13011748 | -1.8645796  | 0.067253837 | 0.160827679 |
| 214909_s_at | 0.288250975 | 5.591024408 | 6.22E-07    | 1.08E-05    |
| 214910_s_at | 0.114713319 | 2.403991804 | 0.019400735 | 0.060153854 |
| 214911_s_at | 0.235296715 | 3.930468313 | 0.000226607 | 0.001467195 |
| 214912_at   | 0.053476374 | 1.093033393 | 0.278854783 | 0.455753445 |
| 214913_at   | -0.77825469 | -7.73208059 | 1.63E-10    | 2.85E-08    |
| 214914_at   | 0.04991862  | 1.893619345 | 0.063218516 | 0.153225531 |
| 214915_at   | -0.0255225  | -0.65310522 | 0.516244229 | 0.686176156 |
| 214916_x_at | -0.00963384 | -0.19907307 | 0.842895103 | 0.913671306 |
| 214917_at   | 0.04197239  | 1.462008189 | 0.14908439  | 0.29292533  |
| 214918_at   | 0.021416645 | 0.938777729 | 0.351700527 | 0.534939166 |
| 214919_s_at | 0.538468287 | 6.358629874 | 3.35E-08    | 1.08E-06    |
| 214920_at   | -0.19418667 | -3.06071981 | 0.003330007 | 0.014031966 |
| 214921_at   | -0.21901509 | -4.45306052 | 3.86E-05    | 0.000332915 |
| 214922_at   | -0.02165499 | -0.9216035  | 0.360516394 | 0.543706509 |
| 214923_at   | -0.06969268 | -1.58608596 | 0.118104888 | 0.246720746 |
| 214924_s_at | 0.447133112 | 5.980507625 | 1.42E-07    | 3.32E-06    |
| 214925_s_at | 0.01091708  | 0.195442886 | 0.845722739 | 0.915272947 |
| 214926_at   | -0.08159377 | -1.88712375 | 0.064102861 | 0.154968841 |
| 214927_at   | 0.164914344 | 3.876614821 | 0.000270322 | 0.001700592 |
| 214928_at   | 0.14593445  | 3.175906129 | 0.002383194 | 0.010558059 |
| 214929_s_at | -0.03172273 | -0.98106488 | 0.330596223 | 0.513039961 |
| 214930_at   | -0.59537356 | -6.81393035 | 5.77E-09    | 3.05E-07    |
| 214931_s_at | -0.2117573  | -2.95582062 | 0.004487744 | 0.018054393 |
| 214932_at   | 0.01949875  | 0.805872177 | 0.423576626 | 0.605168079 |
| 214933_at   | -0.52424703 | -6.15744113 | 7.25E-08    | 1.96E-06    |
| 214934_at   | 0.024514565 | 0.61460998  | 0.54119285  | 0.706580891 |
| 214935_at   | -0.04728545 | -0.83404614 | 0.407643987 | 0.589898494 |
| 214936_at   | 0.041337923 | 1.45910551  | 0.149878955 | 0.294046982 |
| 214937_x_at | 0.168071022 | 3.235775635 | 0.001997287 | 0.009100507 |
| 214938_x_at | 0.100313828 | 2.667258952 | 0.009872654 | 0.034535744 |
| 214939_x_at | -0.02382536 | -0.58603205 | 0.560105774 | 0.721577563 |
| 214940_s_at | 0.1277634   | 3.342582118 | 0.001450729 | 0.006970113 |
| 214941_s_at | -0.00609353 | -0.16708323 | 0.867880125 | 0.928444781 |
| 214942_at   | -0.02138683 | -0.73992161 | 0.462303379 | 0.640381311 |
| 214943_s_at | -0.03829294 | -1.97742354 | 0.052706436 | 0.132887062 |
| 214944_at   | -0.00533001 | -0.13727558 | 0.891283818 | 0.941856849 |
| 214945_at   | -0.80683103 | -5.26723361 | 2.07E-06    | 2.92E-05    |
| 214946_x_at | 0.072348673 | 1.621438077 | 0.110295695 | 0.234423275 |
| 214947_at   | -0.00175899 | -0.05076132 | 0.959688448 | 0.979366948 |
| 214948_s_at | -0.2258082  | -3.10373968 | 0.00294134  | 0.012625276 |
| 214949_at   | -0.48063687 | -5.2200352  | 2.47E-06    | 3.37E-05    |

|             |             |             |             |             |
|-------------|-------------|-------------|-------------|-------------|
| 214950_at   | -0.00891975 | -0.19772351 | 0.843946066 | 0.914278315 |
| 214951_at   | 0.078562334 | 1.633805758 | 0.107664537 | 0.230237977 |
| 214952_at   | -0.08699553 | -0.94487541 | 0.348604439 | 0.531644074 |
| 214953_s_at | -0.28810348 | -4.47916929 | 3.53E-05    | 0.000308395 |
| 214954_at   | 0.083854465 | 2.421018321 | 0.01859582  | 0.058065004 |
| 214955_at   | 0.008958826 | 0.242257585 | 0.809426917 | 0.892992639 |
| 214956_at   | -0.6821461  | -6.43951271 | 2.45E-08    | 8.56E-07    |
| 214957_at   | 0.001293282 | 0.028291855 | 0.977525564 | 0.988697411 |
| 214958_s_at | 0.171465503 | 2.294857748 | 0.025342411 | 0.074488853 |
| 214959_s_at | -0.27245055 | -5.03941803 | 4.78E-06    | 5.81E-05    |
| 214960_at   | -0.0398686  | -1.44953161 | 0.152523167 | 0.297705612 |
| 214961_at   | -0.24052923 | -4.5745057  | 2.53E-05    | 0.000232881 |
| 214962_s_at | -0.04963176 | -1.78627712 | 0.079230958 | 0.182234058 |
| 214963_at   | -0.03085713 | -1.34746398 | 0.183020804 | 0.339951198 |
| 214964_at   | -0.01539277 | -0.42324475 | 0.673666925 | 0.803810397 |
| 214965_at   | -0.25171246 | -3.74711727 | 0.000411091 | 0.002428614 |
| 214966_at   | -0.335535   | -4.77349211 | 1.25E-05    | 0.00012821  |
| 214967_at   | 0.185313978 | 2.001511555 | 0.049977161 | 0.127407409 |
| 214968_at   | -0.08493694 | -2.28142589 | 0.026175564 | 0.076494652 |
| 214969_at   | -0.05953587 | -1.24421089 | 0.218378538 | 0.384932332 |
| 214970_s_at | -0.00727776 | -0.29656431 | 0.767848344 | 0.867042577 |
| 214971_s_at | -0.03413354 | -0.72889246 | 0.468972274 | 0.645781979 |
| 214972_at   | -0.14755703 | -2.87892909 | 0.005563074 | 0.021518512 |
| 214973_x_at | 0.02585916  | 0.685742128 | 0.495581375 | 0.668715401 |
| 214974_x_at | 0.200646721 | 3.262316965 | 0.001845743 | 0.008534031 |
| 214975_s_at | -0.22361846 | -2.9669671  | 0.004348952 | 0.017586263 |
| 214976_at   | 0.017325444 | 0.566864173 | 0.572972706 | 0.731073063 |
| 214977_at   | -0.00471711 | -0.1071177  | 0.915061705 | 0.954807244 |
| 214978_s_at | -0.52363744 | -6.02321668 | 1.21E-07    | 2.93E-06    |
| 214979_at   | 0.046588163 | 1.875775879 | 0.065672963 | 0.157849633 |
| 214980_at   | -0.03518272 | -0.74575943 | 0.458795565 | 0.637399091 |
| 214981_at   | 0.010768596 | 0.564074302 | 0.574857408 | 0.732480422 |
| 214982_at   | -0.00211856 | -0.11216237 | 0.911078215 | 0.952978153 |
| 214983_at   | 0.028740554 | 0.496744701 | 0.621228621 | 0.767383901 |
| 214984_at   | 0.001725134 | 0.085804255 | 0.931914691 | 0.964636173 |
| 214985_at   | 0.032491613 | 0.990558398 | 0.325976218 | 0.508109973 |
| 214986_x_at | 0.094366654 | 2.729161351 | 0.008370835 | 0.030187631 |
| 214987_at   | 0.086974855 | 2.658273562 | 0.010110048 | 0.035198122 |
| 214988_s_at | 0.146804186 | 2.235019572 | 0.029243899 | 0.083432386 |
| 214989_x_at | 0.095086747 | 2.165941087 | 0.034399001 | 0.094963256 |
| 214990_at   | -0.02230739 | -0.56936359 | 0.571286781 | 0.729692735 |
| 214991_s_at | 0.060749069 | 1.505927553 | 0.137460614 | 0.276327176 |
| 214992_s_at | 0.08547493  | 2.517333296 | 0.014581786 | 0.047440431 |
| 214993_at   | -0.13708835 | -3.54824397 | 0.000771462 | 0.004110906 |
| 214994_at   | 0.019712887 | 0.453824916 | 0.651632139 | 0.788849439 |
| 214995_s_at | 0.066327755 | 2.095127132 | 0.040493683 | 0.107928417 |
| 214996_at   | 0.097169857 | 2.475203904 | 0.016229924 | 0.051924231 |
| 214997_at   | -0.25932862 | -4.74232066 | 1.40E-05    | 0.000140834 |
| 214998_at   | -0.35387495 | -5.13559827 | 3.37E-06    | 4.35E-05    |
| 214999_s_at | -0.02263642 | -0.87907089 | 0.382955427 | 0.565618294 |
| 215000_s_at | 0.03958305  | 0.593991996 | 0.554804988 | 0.717105143 |
| 215001_s_at | 0.179448836 | 2.622336005 | 0.011112537 | 0.037975342 |
| 215002_at   | -0.00927873 | -0.60555537 | 0.547149644 | 0.710772863 |
| 215003_at   | -0.2564798  | -5.17891677 | 2.87E-06    | 3.81E-05    |
| 215004_s_at | 0.019521345 | 0.571326626 | 0.569964355 | 0.728586664 |
| 215005_at   | -0.53749903 | -7.05305142 | 2.28E-09    | 1.60E-07    |
| 215006_at   | 0.019731638 | 0.612624327 | 0.542496311 | 0.707269858 |
| 215008_at   | -0.13892026 | -3.21798482 | 0.002105344 | 0.009515778 |
| 215009_s_at | -0.14164299 | -1.51513705 | 0.135116567 | 0.272846087 |
| 215010_s_at | -0.44477595 | -7.46833476 | 4.53E-10    | 5.49E-08    |
| 215011_at   | 0.049220835 | 1.42175836  | 0.160400073 | 0.308893526 |
| 215012_at   | 0.244105926 | 3.116969553 | 0.002830625 | 0.01223465  |
| 215013_s_at | 0.008667714 | 0.288942835 | 0.77364543  | 0.870340089 |
| 215014_at   | -0.48010761 | -5.13302146 | 3.40E-06    | 4.39E-05    |
| 215015_at   | 0.035583675 | 1.263456536 | 0.211431571 | 0.376361165 |
| 215016_x_at | 0.210821451 | 3.954040287 | 0.000209692 | 0.001371113 |
| 215017_s_at | -0.5275775  | -4.63162838 | 2.07E-05    | 0.000196547 |
| 215018_at   | 0.003332272 | 0.123759212 | 0.901929694 | 0.947912753 |
| 215019_x_at | -0.01485626 | -0.38003389 | 0.705294991 | 0.826261337 |
| 215020_at   | -0.27066324 | -4.92037992 | 7.37E-06    | 8.31E-05    |
| 215021_s_at | -0.20439995 | -4.4190128  | 4.35E-05    | 0.000366343 |
| 215022_x_at | -0.03093119 | -0.74939448 | 0.456619097 | 0.635479812 |
| 215023_s_at | -0.06211627 | -1.23275978 | 0.222591017 | 0.389660703 |
| 215024_at   | 0.110910499 | 1.944160458 | 0.056684653 | 0.140726059 |
| 215025_at   | -0.14924617 | -3.03832485 | 0.003550839 | 0.014813226 |



|             |             |             |             |             |
|-------------|-------------|-------------|-------------|-------------|
| 215026_x_at | -0.04136106 | -0.71646699 | 0.476550435 | 0.652332141 |
| 215027_at   | 0.078076838 | 1.980635387 | 0.052335291 | 0.132214198 |
| 215028_at   | 0.773629267 | 5.962330445 | 1.53E-07    | 3.50E-06    |
| 215029_at   | 0.055412498 | 1.069374184 | 0.289288804 | 0.46761474  |
| 215030_at   | -0.05221091 | -1.03484071 | 0.304997505 | 0.484966325 |
| 215031_x_at | -0.11816595 | -2.68789677 | 0.009346569 | 0.033041993 |
| 215032_at   | 0.111189305 | 2.594041162 | 0.011964661 | 0.040380957 |
| 215033_at   | 0.023201268 | 0.702125727 | 0.485381929 | 0.660195057 |
| 215034_s_at | 0.002079025 | 0.017885707 | 0.985790825 | 0.993167574 |
| 215035_at   | 0.012518379 | 0.466440863 | 0.642630361 | 0.782914516 |
| 215036_at   | 0.139979606 | 2.935490983 | 0.004751534 | 0.018911349 |
| 215037_s_at | -0.01440364 | -0.32977181 | 0.742749004 | 0.850915943 |
| 215038_s_at | 0.222654148 | 5.618424543 | 5.61E-07    | 9.92E-06    |
| 215039_at   | -0.03921017 | -0.80624612 | 0.423362737 | 0.604989425 |
| 215040_at   | -0.01163037 | -0.24885791 | 0.804341335 | 0.889728839 |
| 215041_s_at | -0.01962986 | -0.53874914 | 0.59210197  | 0.745750796 |
| 215042_at   | -0.00415415 | -0.07574144 | 0.939882946 | 0.968554696 |
| 215043_s_at | 0.261971818 | 2.556290635 | 0.013194037 | 0.043724446 |
| 215044_s_at | 0.020406903 | 0.454192042 | 0.651369441 | 0.788682497 |
| 215045_at   | -0.3484531  | -4.69926949 | 1.63E-05    | 0.000160696 |
| 215046_at   | 0.202698885 | 4.572614023 | 2.54E-05    | 0.000234    |
| 215047_at   | -0.03771881 | -1.43723586 | 0.155972377 | 0.302548501 |
| 215048_at   | 0.034740713 | 1.053271877 | 0.29654259  | 0.475566292 |
| 215049_x_at | 0.710775324 | 3.389493661 | 0.001258378 | 0.006177443 |
| 215050_x_at | 0.147910718 | 3.91930395  | 0.00023507  | 0.001513362 |
| 215051_x_at | -0.01977087 | -0.3033455  | 0.762701561 | 0.863563011 |
| 215052_at   | -0.34691112 | -6.27542425 | 4.61E-08    | 1.38E-06    |
| 215053_at   | -0.0065174  | -0.18270619 | 0.855659556 | 0.920940585 |
| 215054_at   | 0.087877546 | 3.173749502 | 0.002398323 | 0.010607211 |
| 215055_at   | 0.045437146 | 1.246969088 | 0.217372727 | 0.383616638 |
| 215056_at   | -0.36621901 | -4.58687645 | 2.42E-05    | 0.000224169 |
| 215057_at   | 0.021816618 | 0.569493396 | 0.571199287 | 0.729643539 |
| 215058_at   | -0.14607221 | -3.79756897 | 0.000349443 | 0.002113877 |
| 215059_at   | -0.05405516 | -1.73396637 | 0.088185538 | 0.19790048  |
| 215060_at   | -0.02677797 | -0.60466653 | 0.547736179 | 0.711115074 |
| 215061_at   | -0.01278776 | -0.37620852 | 0.70812131  | 0.828031334 |
| 215062_at   | 0.410061009 | 4.960947259 | 6.36E-06    | 7.35E-05    |
| 215063_x_at | 0.202506651 | 4.341393419 | 5.68E-05    | 0.000458943 |
| 215064_at   | -0.12875498 | -2.45200179 | 0.017207646 | 0.054495756 |
| 215065_at   | -0.03379418 | -0.58647653 | 0.559809119 | 0.721382538 |
| 215066_at   | 0.031383605 | 0.646573777 | 0.520433754 | 0.689460699 |
| 215067_x_at | 0.242326441 | 4.746562123 | 1.37E-05    | 0.000139098 |
| 215068_s_at | -0.37957545 | -5.01728872 | 5.18E-06    | 6.20E-05    |
| 215069_at   | -0.0292251  | -0.59756994 | 0.552430542 | 0.714883767 |
| 215070_x_at | 0.063161174 | 1.249101572 | 0.216597435 | 0.382706277 |
| 215071_s_at | 0.437128384 | 4.417813164 | 4.37E-05    | 0.000367403 |
| 215072_x_at | -0.02927957 | -1.41733267 | 0.161683899 | 0.310647729 |
| 215073_s_at | 0.060871764 | 1.767763451 | 0.082309377 | 0.187557778 |
| 215074_at   | 0.020553088 | 0.980035022 | 0.331100004 | 0.513642312 |
| 215075_s_at | -0.24426393 | -7.69179792 | 1.90E-10    | 3.17E-08    |
| 215076_s_at | 0.051105456 | 1.620504649 | 0.110496374 | 0.234665651 |
| 215077_at   | -0.01596741 | -0.80415139 | 0.424561719 | 0.606005359 |
| 215078_at   | 0.289781    | 2.443808446 | 0.017565371 | 0.055447913 |
| 215079_at   | -0.03624728 | -0.84164944 | 0.40340783  | 0.58574083  |
| 215080_s_at | -0.57381528 | -7.21210666 | 1.23E-09    | 1.08E-07    |
| 215081_at   | -0.03436749 | -1.16262691 | 0.249696526 | 0.422130321 |
| 215082_at   | -0.03837936 | -0.71526065 | 0.477289817 | 0.652944274 |
| 215083_at   | 0.292149772 | 5.474998329 | 9.59E-07    | 1.54E-05    |
| 215084_s_at | 0.036373974 | 1.181502464 | 0.242178636 | 0.412683403 |
| 215085_x_at | 0.162515446 | 1.992422931 | 0.050992325 | 0.129451946 |
| 215086_at   | 0.027808022 | 1.02515536  | 0.309505613 | 0.490042331 |
| 215087_at   | -9.06E-06   | -0.00022059 | 0.999824747 | 0.999847119 |
| 215088_s_at | 0.12019434  | 2.262635191 | 0.02738184  | 0.079109781 |
| 215089_s_at | 0.128263422 | 2.999275608 | 0.003968885 | 0.016295082 |
| 215090_x_at | 0.090237994 | 2.427127002 | 0.018314424 | 0.057367252 |
| 215091_s_at | -0.19200728 | -2.64863278 | 0.010370546 | 0.035912014 |
| 215092_s_at | -0.02320261 | -0.61400014 | 0.541593002 | 0.706728823 |
| 215093_at   | 0.058276436 | 1.682997026 | 0.097699847 | 0.21374207  |
| 215094_at   | -0.01117533 | -0.44764521 | 0.656060694 | 0.791849185 |
| 215095_at   | 0.189720108 | 6.181917456 | 6.60E-08    | 1.82E-06    |
| 215096_s_at | 0.282169753 | 4.872160951 | 8.76E-06    | 9.57E-05    |
| 215097_at   | -0.00106179 | -0.03019826 | 0.976011611 | 0.987986585 |
| 215098_at   | -0.05868062 | -1.39054978 | 0.169623618 | 0.321875795 |
| 215099_s_at | -0.15112606 | -3.19606561 | 0.002246038 | 0.010057101 |
| 215100_at   | -0.03410627 | -0.5534547  | 0.582058885 | 0.737975723 |

|             |             |             |             |             |
|-------------|-------------|-------------|-------------|-------------|
| 215101_s_at | 0.002953932 | 0.168855034 | 0.8664925   | 0.927796134 |
| 215102_at   | 0.039219567 | 1.053054375 | 0.296641418 | 0.475707713 |
| 215103_at   | -0.03277629 | -0.95794378 | 0.342029023 | 0.524971361 |
| 215104_at   | -0.0591187  | -1.07377567 | 0.287327531 | 0.465503546 |
| 215105_at   | 0.048478091 | 1.506280763 | 0.137370124 | 0.276198739 |
| 215106_at   | 0.000878766 | 0.020825915 | 0.983455317 | 0.991933762 |
| 215107_s_at | 0.01029022  | 0.555868042 | 0.580418531 | 0.736870864 |
| 215108_x_at | 0.058831715 | 1.821061265 | 0.073706747 | 0.172312703 |
| 215109_at   | -0.00928158 | -0.31725472 | 0.752178599 | 0.857341646 |
| 215110_at   | -0.00179474 | -0.04678496 | 0.962843789 | 0.981086035 |
| 215111_s_at | 0.022441294 | 0.305328752 | 0.761198333 | 0.862500581 |
| 215112_x_at | -0.02837955 | -1.9713709  | 0.053411988 | 0.134272052 |
| 215113_s_at | -0.14035356 | -2.81565051 | 0.006621927 | 0.024863241 |
| 215114_at   | -0.00876501 | -0.26490128 | 0.792015623 | 0.881513272 |
| 215115_x_at | -0.18973996 | -4.41581481 | 4.40E-05    | 0.000369311 |
| 215116_s_at | -0.86869602 | -5.61823947 | 5.61E-07    | 9.92E-06    |
| 215117_at   | -0.01852507 | -1.05534374 | 0.295602317 | 0.474586001 |
| 215118_s_at | -0.04507631 | -1.17735677 | 0.243815658 | 0.414713963 |
| 215119_at   | 0.043375272 | 1.000240149 | 0.32130916  | 0.50315859  |
| 215120_s_at | 0.053274151 | 1.150946428 | 0.254431694 | 0.427644275 |
| 215121_x_at | 0.056553589 | 1.041176567 | 0.302072735 | 0.481721131 |
| 215122_at   | 0.039887613 | 1.238124572 | 0.220610119 | 0.387548625 |
| 215123_at   | 0.275133318 | 2.142173636 | 0.036348457 | 0.099199146 |
| 215124_at   | -0.04695623 | -0.93613737 | 0.35304669  | 0.536150146 |
| 215125_s_at | -0.03813688 | -1.14434319 | 0.257136778 | 0.430878365 |
| 215126_at   | -0.09781369 | -1.3817249  | 0.17230441  | 0.325569172 |
| 215127_s_at | -0.07168295 | -1.59384861 | 0.11635306  | 0.243939155 |
| 215128_at   | 0.003851917 | 0.129839329 | 0.897138463 | 0.944848596 |
| 215129_at   | 0.006226758 | 0.180337359 | 0.857510294 | 0.922266209 |
| 215130_s_at | 0.05857177  | 1.599369245 | 0.115119984 | 0.242001051 |
| 215131_at   | -0.00357098 | -0.12413997 | 0.901629542 | 0.947731019 |
| 215132_at   | -0.08769161 | -2.62154652 | 0.011135543 | 0.038051052 |
| 215133_s_at | -0.1337089  | -4.70877762 | 1.57E-05    | 0.00015636  |
| 215134_at   | -0.03659621 | -0.91212124 | 0.365444262 | 0.548749621 |
| 215135_at   | 0.029917453 | 0.720156353 | 0.474293178 | 0.650337814 |
| 215136_s_at | 0.211395756 | 3.230693669 | 0.002027609 | 0.009214755 |
| 215137_at   | 0.067811884 | 1.851748041 | 0.069104993 | 0.164147772 |
| 215138_s_at | -0.11156913 | -3.00312255 | 0.003925751 | 0.016146665 |
| 215139_at   | 0.133943184 | 3.54237476  | 0.000785712 | 0.004169441 |
| 215140_at   | 0.076977016 | 1.421468741 | 0.160483845 | 0.309010996 |
| 215141_at   | -0.02819466 | -0.72888542 | 0.468976549 | 0.645781979 |
| 215142_at   | -0.02919886 | -0.65335756 | 0.516082731 | 0.686084458 |
| 215143_at   | -0.86988842 | -7.14757481 | 1.58E-09    | 1.26E-07    |
| 215144_at   | -0.02215016 | -0.77793803 | 0.439737019 | 0.620233757 |
| 215145_s_at | -0.23587181 | -2.39779615 | 0.019701291 | 0.060836736 |
| 215146_s_at | 0.101123066 | 2.495550349 | 0.015414055 | 0.049767732 |
| 215147_at   | -0.1896098  | -3.06184248 | 0.003319281 | 0.013994841 |
| 215148_s_at | 0.270401234 | 7.100763268 | 1.89E-09    | 1.41E-07    |
| 215149_at   | -0.52435381 | -6.20694815 | 6.00E-08    | 1.70E-06    |
| 215150_at   | -0.02425101 | -0.83424538 | 0.407532637 | 0.589830536 |
| 215151_at   | 0.202565374 | 4.75582218  | 1.33E-05    | 0.000135222 |
| 215152_at   | -0.01111324 | -0.56359971 | 0.575178317 | 0.732694942 |
| 215153_at   | -0.02757947 | -0.59819996 | 0.552012966 | 0.714550295 |
| 215154_at   | 0.079544431 | 2.384907357 | 0.020339931 | 0.062437819 |
| 215155_at   | 0.160303197 | 3.836688584 | 0.000307851 | 0.001903495 |
| 215156_at   | 0.048275705 | 1.279944979 | 0.205611344 | 0.368920028 |
| 215157_x_at | 0.143630354 | 2.252317949 | 0.028064867 | 0.080703663 |
| 215158_s_at | -0.00825    | -0.2993035  | 0.765768077 | 0.865471873 |
| 215159_s_at | -0.14412956 | -3.74627575 | 0.000412202 | 0.002433895 |
| 215160_x_at | -0.21812775 | -2.51376775 | 0.014715174 | 0.047804793 |
| 215161_at   | -0.53416707 | -6.18285436 | 6.58E-08    | 1.82E-06    |
| 215162_at   | 0.07795097  | 2.24649604  | 0.028456903 | 0.081636654 |
| 215163_at   | 0.050782026 | 1.562750097 | 0.123499243 | 0.255103909 |
| 215164_at   | 0.39101658  | 5.721022472 | 3.81E-07    | 7.27E-06    |
| 215165_x_at | 0.097464594 | 2.793657176 | 0.007031502 | 0.02614626  |
| 215166_at   | 0.025661027 | 0.814202925 | 0.418827001 | 0.601176013 |
| 215167_at   | -0.1038978  | -2.55073731 | 0.013384251 | 0.044266182 |
| 215168_at   | -0.03465016 | -1.66663549 | 0.10092683  | 0.219132428 |
| 215169_at   | -0.01250159 | -0.11243683 | 0.910861557 | 0.952907881 |
| 215170_s_at | 0.033459826 | 1.60059991  | 0.114846548 | 0.241581407 |
| 215171_s_at | -0.29822422 | -4.38622908 | 4.87E-05    | 0.000402605 |
| 215172_at   | -0.13780897 | -4.38936427 | 4.82E-05    | 0.000398858 |
| 215173_at   | -0.00726629 | -0.15180025 | 0.879866198 | 0.935570891 |
| 215174_at   | -0.01469934 | -0.3708631  | 0.712077607 | 0.830858923 |
| 215175_at   | -0.05269124 | -0.69136922 | 0.492065103 | 0.666021794 |

|             |             |             |             |             |
|-------------|-------------|-------------|-------------|-------------|
| 215176_x_at | -0.02560424 | -0.6437043  | 0.522280014 | 0.691156532 |
| 215177_s_at | 0.240617255 | 3.228167922 | 0.002042839 | 0.009269833 |
| 215178_x_at | -0.04924823 | -1.39928137 | 0.167002854 | 0.318389708 |
| 215179_x_at | 0.301132972 | 5.061490006 | 4.41E-06    | 5.44E-05    |
| 215180_at   | 0.008126281 | 0.179444579 | 0.858208021 | 0.922663509 |
| 215181_at   | -0.05345576 | -1.13476618 | 0.261096378 | 0.435423684 |
| 215182_x_at | 0.009863827 | 0.280011377 | 0.780455419 | 0.874517076 |
| 215183_at   | 0.029950536 | 0.924439449 | 0.359050919 | 0.542173317 |
| 215184_at   | 0.115830009 | 1.981482904 | 0.05223773  | 0.132010666 |
| 215185_at   | 0.044101099 | 1.740083908 | 0.087096894 | 0.196097449 |
| 215186_at   | -0.06534984 | -1.87594877 | 0.0656488   | 0.157800041 |
| 215187_at   | 0.017554124 | 0.666187709 | 0.507906866 | 0.679073015 |
| 215188_at   | 0.04154545  | 1.253531927 | 0.214993253 | 0.380790174 |
| 215189_at   | 0.010489295 | 0.287535456 | 0.774717346 | 0.871045119 |
| 215190_at   | -0.01755678 | -0.53875697 | 0.592096603 | 0.745750796 |
| 215191_at   | 0.116258854 | 3.934611861 | 0.000223542 | 0.001450425 |
| 215192_at   | -0.02512798 | -0.55521398 | 0.580862878 | 0.737086836 |
| 215193_x_at | 0.338442761 | 2.156778673 | 0.035139398 | 0.096559884 |
| 215194_at   | -0.03859042 | -0.93754792 | 0.35232712  | 0.535574725 |
| 215195_at   | 0.097706075 | 2.25725888  | 0.027735908 | 0.079900296 |
| 215196_at   | 0.035210546 | 1.064248232 | 0.291584529 | 0.470026899 |
| 215197_at   | 0.037116876 | 1.424842876 | 0.159509986 | 0.307674591 |
| 215198_s_at | 0.170827159 | 3.367673952 | 0.001344632 | 0.006535928 |
| 215199_at   | -0.01239034 | -0.35089681 | 0.72692487  | 0.840518636 |
| 215200_x_at | 0.15962798  | 4.449924657 | 3.91E-05    | 0.00033578  |
| 215201_at   | 0.092216261 | 2.277434962 | 0.02642775  | 0.077043575 |
| 215202_at   | -0.02430726 | -0.41512038 | 0.67957064  | 0.808127799 |
| 215203_at   | 0.286450275 | 4.397332968 | 4.69E-05    | 0.000389826 |
| 215204_at   | 0.100402797 | 2.627033486 | 0.010976543 | 0.037591085 |
| 215205_x_at | -0.05972867 | -1.47309663 | 0.146079428 | 0.288632646 |
| 215206_at   | 0.146699644 | 2.286007147 | 0.025888707 | 0.075800453 |
| 215207_x_at | -0.01970004 | -0.42773019 | 0.670416279 | 0.80156669  |
| 215208_x_at | 0.258326387 | 4.898393116 | 7.97E-06    | 8.85E-05    |
| 215209_at   | 0.027749639 | 1.427198852 | 0.158832715 | 0.306693542 |
| 215210_s_at | 0.065154384 | 1.198621695 | 0.23550274  | 0.404468851 |
| 215211_at   | -0.17330006 | -3.63157973 | 0.000593885 | 0.003309466 |
| 215212_at   | 0.035507056 | 1.798356879 | 0.077274594 | 0.178708346 |
| 215213_at   | -0.00115816 | -0.04884113 | 0.961212087 | 0.980218016 |
| 215214_at   | 0.020703817 | 0.853242729 | 0.39700095  | 0.579391939 |
| 215215_s_at | 0.003304337 | 0.082498847 | 0.934531351 | 0.96593527  |
| 215216_at   | -0.0013635  | -0.02770371 | 0.977992648 | 0.988805552 |
| 215217_at   | 0.109905187 | 3.540893437 | 0.000789348 | 0.004184458 |
| 215218_s_at | -0.07048817 | -1.55763611 | 0.124707372 | 0.257100373 |
| 215219_at   | -0.05510053 | -1.86892805 | 0.066636076 | 0.159640821 |
| 215220_s_at | -0.00038995 | -0.02439758 | 0.980618418 | 0.990288496 |
| 215221_at   | 0.153111298 | 4.097896583 | 0.000129987 | 0.000921098 |
| 215222_x_at | 0.25069313  | 4.325731801 | 6.00E-05    | 0.000479216 |
| 215223_s_at | 0.331421338 | 2.148367789 | 0.03583131  | 0.09805638  |
| 215224_at   | 0.048098936 | 1.876538222 | 0.065566475 | 0.157678482 |
| 215225_s_at | 0.072610105 | 0.917019084 | 0.362893522 | 0.546027653 |
| 215226_at   | -0.07617554 | -1.3239469  | 0.190664988 | 0.349515981 |
| 215227_x_at | -0.17344109 | -2.42335113 | 0.018487905 | 0.057792645 |
| 215228_at   | 0.248053022 | 4.755713408 | 1.33E-05    | 0.000135244 |
| 215229_at   | -0.01241248 | -0.47683182 | 0.635256312 | 0.777574215 |
| 215230_x_at | -0.20138351 | -2.20771071 | 0.031194287 | 0.087858274 |
| 215231_at   | 0.008598846 | 0.426358798 | 0.671409474 | 0.802080463 |
| 215232_at   | -0.01496926 | -0.506065   | 0.614710694 | 0.762874885 |
| 215233_at   | 0.167964156 | 1.917885595 | 0.060005725 | 0.14706983  |
| 215234_at   | -0.00169665 | -0.03596962 | 0.9714289   | 0.98554624  |
| 215235_at   | 0.026690643 | 0.529020562 | 0.598790587 | 0.750743584 |
| 215236_s_at | -0.32106322 | -2.43066884 | 0.018153027 | 0.056972968 |
| 215237_at   | 0.074325118 | 2.226815396 | 0.029818212 | 0.084713975 |
| 215238_s_at | -0.03600452 | -0.83606343 | 0.406517419 | 0.588878403 |
| 215239_x_at | 0.102189402 | 1.447898413 | 0.152977854 | 0.298436696 |
| 215240_at   | -0.00910687 | -0.42771469 | 0.670427505 | 0.80156669  |
| 215241_at   | -1.64594979 | -6.52585099 | 1.76E-08    | 6.73E-07    |
| 215242_at   | 0.016995178 | 0.733945128 | 0.465910368 | 0.643463108 |
| 215243_s_at | 0.017059342 | 0.335185198 | 0.738683034 | 0.848407231 |
| 215244_at   | -0.28552149 | -5.10556162 | 3.76E-06    | 4.77E-05    |
| 215245_x_at | 0.188835793 | 2.436182436 | 0.017904319 | 0.056334823 |
| 215246_at   | -0.03466361 | -0.73940988 | 0.462611597 | 0.640557999 |
| 215247_at   | 0.009677965 | 0.223223465 | 0.824138352 | 0.902337788 |
| 215248_at   | 0.114336703 | 2.247986469 | 0.028356082 | 0.08140875  |
| 215249_at   | 0.003253682 | 0.148087642 | 0.882782285 | 0.937311268 |
| 215250_at   | 0.07990678  | 1.797268542 | 0.077449184 | 0.179020373 |

|             |              |             |             |             |
|-------------|--------------|-------------|-------------|-------------|
| 215251_at   | 0.052398004  | 1.630488103 | 0.108365297 | 0.231347481 |
| 215252_at   | -0.03076493  | -0.79495425 | 0.429849995 | 0.610760347 |
| 215253_s_at | -0.16593602  | -3.86229165 | 0.000283249 | 0.001773957 |
| 215254_at   | 0.029675868  | 1.129622568 | 0.263240759 | 0.437970378 |
| 215255_at   | -0.027633761 | -2.06641549 | 0.043220579 | 0.113771594 |
| 215256_x_at | -0.18148956  | -3.25570236 | 0.001882463 | 0.008671516 |
| 215257_at   | -0.02347777  | -0.78974765 | 0.432861065 | 0.613731377 |
| 215258_at   | 0.035863466  | 0.777074848 | 0.440242101 | 0.620769836 |
| 215259_s_at | 0.130119057  | 2.11447761  | 0.038741381 | 0.104187317 |
| 215260_s_at | 0.054764053  | 1.982001703 | 0.052178086 | 0.131882312 |
| 215261_at   | 0.001868344  | 0.046400238 | 0.963149105 | 0.981137201 |
| 215262_at   | -0.0323021   | -0.97375122 | 0.334184905 | 0.516992343 |
| 215263_at   | 0.000918973  | 0.024530754 | 0.980512645 | 0.990272663 |
| 215264_at   | 0.02122041   | 0.544653117 | 0.588060081 | 0.742816233 |
| 215265_at   | 0.026701407  | 0.643949776 | 0.522121938 | 0.691029189 |
| 215266_at   | 0.035889688  | 0.767369284 | 0.445944671 | 0.625912854 |
| 215267_s_at | -0.48345947  | -7.65310705 | 2.21E-10    | 3.45E-08    |
| 215268_at   | 0.213462027  | 4.066633502 | 0.000144321 | 0.001001706 |
| 215269_at   | 0.209194548  | 3.07909905  | 0.003158427 | 0.013407716 |
| 215270_at   | -0.02238364  | -0.51933884 | 0.605481672 | 0.755470194 |
| 215271_at   | 0.006232236  | 0.209777071 | 0.834569717 | 0.90879847  |
| 215272_at   | 0.010672524  | 0.270444873 | 0.787768813 | 0.878827451 |
| 215273_s_at | 0.081570819  | 1.465277197 | 0.148193501 | 0.291726377 |
| 215274_at   | -0.01843995  | -0.47534739 | 0.636307501 | 0.778432321 |
| 215275_at   | 0.024893418  | 0.6774939   | 0.50076032  | 0.673284603 |
| 215276_at   | -0.00202446  | -0.05175483 | 0.958900167 | 0.978964872 |
| 215277_at   | -0.17479555  | -2.85945107 | 0.005871023 | 0.022487811 |
| 215278_at   | 0.048402083  | 0.989735221 | 0.326375104 | 0.508572091 |
| 215279_at   | 0.019631477  | 0.473803373 | 0.637401694 | 0.779141992 |
| 215280_s_at | -0.20809462  | -3.51024472 | 0.000868269 | 0.004529551 |
| 215281_x_at | 0.32059998   | 5.600319931 | 6.00E-07    | 1.05E-05    |
| 215282_at   | -0.03263039  | -1.45389539 | 0.151313454 | 0.296133336 |
| 215283_at   | 0.05638298   | 1.550771211 | 0.126343977 | 0.259659937 |
| 215284_at   | 0.078340391  | 2.187937723 | 0.03267706  | 0.091166937 |
| 215285_s_at | -0.01635963  | -0.53243168 | 0.596441366 | 0.749045439 |
| 215286_s_at | -0.05050283  | -1.61522547 | 0.111636923 | 0.236581979 |
| 215287_at   | -0.55148175  | -5.34785112 | 1.54E-06    | 2.28E-05    |
| 215288_at   | 0.072658521  | 1.967159293 | 0.05390769  | 0.135320293 |
| 215289_at   | -0.02800163  | -1.20607835 | 0.232637048 | 0.401181315 |
| 215290_at   | 0.177435296  | 2.580497361 | 0.012393214 | 0.041541851 |
| 215291_at   | 0.020984329  | 0.583100881 | 0.562064064 | 0.723152832 |
| 215292_s_at | -0.00325072  | -0.06856115 | 0.945572494 | 0.971983023 |
| 215293_s_at | 0.021356694  | 0.612362013 | 0.542668624 | 0.707421548 |
| 215294_s_at | -0.04479416  | -0.66516085 | 0.508558645 | 0.679677592 |
| 215295_at   | -0.05193927  | -1.10408947 | 0.274070015 | 0.450299862 |
| 215296_at   | 0.214235143  | 3.826849081 | 0.000317841 | 0.001953374 |
| 215297_at   | -0.01402164  | -0.34495842 | 0.731361434 | 0.843246563 |
| 215298_at   | -0.01398698  | -0.50020361 | 0.618806116 | 0.766000525 |
| 215299_x_at | 0.021391068  | 0.421371942 | 0.675026022 | 0.804765998 |
| 215300_s_at | -0.01652052  | -0.57651532 | 0.566476155 | 0.726654176 |
| 215301_at   | -0.0500355   | -1.81086729 | 0.075291206 | 0.175146501 |
| 215302_at   | -0.00397117  | -0.13696071 | 0.891531598 | 0.941904388 |
| 215303_at   | -0.77082921  | -6.074789   | 9.94E-08    | 2.51E-06    |
| 215304_at   | 0.112500928  | 2.681900597 | 0.009496713 | 0.033464251 |
| 215305_at   | 0.073455138  | 3.052103647 | 0.003413406 | 0.014334893 |
| 215306_at   | 0.391633046  | 4.19836985  | 9.26E-05    | 0.000690306 |
| 215307_at   | -0.47544447  | -4.55913845 | 2.67E-05    | 0.000243337 |
| 215308_at   | 0.063974603  | 3.033847881 | 0.003596593 | 0.014974749 |
| 215309_at   | -0.0022257   | -0.15164666 | 0.879986807 | 0.935642279 |
| 215310_at   | 0.221356141  | 4.579214633 | 2.49E-05    | 0.000229721 |
| 215311_at   | -0.42259319  | -4.49249954 | 3.37E-05    | 0.000295951 |
| 215312_at   | -0.0034103   | -0.13488317 | 0.893166744 | 0.942884184 |
| 215313_x_at | 0.262163142  | 2.97300113  | 0.004275494 | 0.017343004 |
| 215314_at   | 0.077297215  | 1.151858302 | 0.254059737 | 0.427208969 |
| 215315_at   | -0.01207562  | -0.46187624 | 0.64588121  | 0.785154933 |
| 215316_at   | 0.04980574   | 2.176694843 | 0.033547481 | 0.093089782 |
| 215317_at   | -0.02922548  | -0.81846003 | 0.416412351 | 0.598709973 |
| 215318_at   | 0.152869723  | 3.60940122  | 0.000636904 | 0.003510234 |
| 215319_at   | -0.04309404  | -1.54935108 | 0.126684671 | 0.260180658 |
| 215320_at   | 0.017574447  | 0.729096269 | 0.468848545 | 0.64572509  |
| 215321_at   | -0.6154506   | -5.34956128 | 1.53E-06    | 2.27E-05    |
| 215322_at   | -0.09565271  | -2.74080173 | 0.008113    | 0.029423534 |
| 215323_at   | -0.04337871  | -1.28857784 | 0.202612081 | 0.365176572 |
| 215324_at   | 0.013689954  | 0.649865525 | 0.518320054 | 0.687830627 |
| 215325_x_at | -0.27962297  | -7.01958242 | 2.60E-09    | 1.74E-07    |

|             |             |             |             |             |
|-------------|-------------|-------------|-------------|-------------|
| 215326_at   | 0.008271479 | 0.240905138 | 0.810470011 | 0.893586425 |
| 215327_at   | -0.04570541 | -1.13247014 | 0.262052063 | 0.436545057 |
| 215328_at   | 0.00090145  | 0.017117001 | 0.986401456 | 0.993419155 |
| 215329_s_at | 0.041657489 | 1.151607895 | 0.254161841 | 0.4273032   |
| 215330_at   | 0.197478634 | 3.023766079 | 0.00370165  | 0.015357853 |
| 215331_at   | 0.064019935 | 1.983845674 | 0.051966567 | 0.13142945  |
| 215332_s_at | -0.00611341 | -0.28537448 | 0.776364094 | 0.871933867 |
| 215333_x_at | 0.023021307 | 0.351668692 | 0.726348882 | 0.840211628 |
| 215334_at   | -0.23141482 | -4.70018205 | 1.62E-05    | 0.000160317 |
| 215335_at   | -0.0053269  | -0.1808326  | 0.857123303 | 0.921938741 |
| 215336_at   | 0.081448369 | 2.29569367  | 0.025291346 | 0.074387684 |
| 215337_at   | -0.01586614 | -0.47419611 | 0.637123299 | 0.778880532 |
| 215338_s_at | 0.281317217 | 4.092746089 | 0.00013225  | 0.000933876 |
| 215339_at   | 0.024180617 | 1.06108575  | 0.293007138 | 0.471520777 |
| 215340_at   | -0.0440084  | -1.00622863 | 0.318444948 | 0.499769696 |
| 215341_at   | 7.85E-05    | 0.001646547 | 0.998691842 | 0.999340299 |
| 215342_s_at | -0.25792406 | -2.23934016 | 0.028945388 | 0.082770958 |
| 215343_at   | -0.63892407 | -6.96638358 | 3.19E-09    | 2.01E-07    |
| 215344_at   | -0.01967594 | -0.6010559  | 0.550122063 | 0.713114693 |
| 215345_x_at | -0.03055572 | -0.69540482 | 0.489551808 | 0.663826252 |
| 215346_at   | -0.01093284 | -0.25706855 | 0.798026858 | 0.885613239 |
| 215347_at   | 0.016761012 | 0.55608936  | 0.580268213 | 0.736784674 |
| 215348_at   | -0.04413374 | -1.11647455 | 0.268778769 | 0.444268735 |
| 215349_at   | 0.074182673 | 1.736248169 | 0.087778172 | 0.197303424 |
| 215350_at   | 0.108771537 | 2.60080548  | 0.011755709 | 0.039780887 |
| 215351_at   | 0.120153937 | 1.731028514 | 0.088712329 | 0.198746066 |
| 215352_at   | -0.00771022 | -0.24704591 | 0.805736657 | 0.890596579 |
| 215353_at   | 0.028777897 | 0.734028396 | 0.465860003 | 0.64341726  |
| 215354_s_at | -0.04801899 | -1.21464018 | 0.22937802  | 0.397114106 |
| 215355_at   | -0.00970544 | -0.44550247 | 0.657599153 | 0.792766006 |
| 215356_at   | -0.22557673 | -4.63844774 | 2.02E-05    | 0.000192606 |
| 215357_s_at | -0.00158866 | -0.04695143 | 0.962711676 | 0.980994217 |
| 215358_x_at | -0.10558385 | -1.92937499 | 0.05853366  | 0.144131478 |
| 215359_x_at | 0.262136837 | 5.988383977 | 1.38E-07    | 3.25E-06    |
| 215360_at   | 0.051374709 | 1.50807102  | 0.136912196 | 0.275437734 |
| 215361_at   | 0.002976399 | 0.100224991 | 0.92050801  | 0.958253247 |
| 215362_at   | 0.049478532 | 1.355717184 | 0.180394065 | 0.336639172 |
| 215363_x_at | 0.19418239  | 1.194890715 | 0.236946187 | 0.406292165 |
| 215364_s_at | 0.06369349  | 1.92488502  | 0.059105229 | 0.145242806 |
| 215365_at   | -0.08765522 | -2.39175219 | 0.019998499 | 0.061563543 |
| 215366_at   | -0.02174969 | -0.59627188 | 0.553291385 | 0.715749062 |
| 215367_at   | 0.013534246 | 0.318896605 | 0.750939503 | 0.856781503 |
| 215368_at   | -0.01107374 | -0.4662569  | 0.642761241 | 0.78292457  |
| 215369_at   | 0.098227183 | 3.311073581 | 0.001595183 | 0.007544118 |
| 215370_at   | -0.08952045 | -2.05041899 | 0.044807832 | 0.117101434 |
| 215371_at   | 0.010341297 | 0.3029247   | 0.763020628 | 0.863704185 |
| 215372_x_at | 0.170075883 | 4.579460122 | 2.48E-05    | 0.00022957  |
| 215373_x_at | 0.343225912 | 5.373700438 | 1.40E-06    | 2.10E-05    |
| 215374_at   | 0.161751384 | 4.761936763 | 1.30E-05    | 0.000132709 |
| 215375_x_at | 0.093693908 | 2.775813353 | 0.00738081  | 0.027198317 |
| 215376_at   | 0.094485635 | 3.182494724 | 0.002337526 | 0.01038994  |
| 215377_at   | 0.082187016 | 2.374426507 | 0.020872847 | 0.063754057 |
| 215378_at   | 0.064893498 | 3.518092396 | 0.000847375 | 0.004438166 |
| 215379_x_at | 0.048953972 | 1.078969403 | 0.285025101 | 0.462724465 |
| 215380_s_at | -0.12304565 | -2.33401077 | 0.023046582 | 0.069076375 |
| 215381_at   | -0.0561069  | -1.18269406 | 0.241709578 | 0.412088368 |
| 215382_x_at | -0.03135452 | -0.74468989 | 0.459437081 | 0.637973032 |
| 215383_x_at | 0.176768821 | 5.227275388 | 2.40E-06    | 3.29E-05    |
| 215384_s_at | -0.06360798 | -1.20164454 | 0.234337946 | 0.403150582 |
| 215385_at   | 0.290437328 | 4.065244649 | 0.000144992 | 0.001005895 |
| 215386_at   | 0.04665894  | 0.875860683 | 0.384683974 | 0.567290179 |
| 215387_x_at | 0.085450603 | 1.923078747 | 0.059336503 | 0.145731    |
| 215388_s_at | 0.350128301 | 2.901978096 | 0.005218001 | 0.020399133 |
| 215389_s_at | -0.03856252 | -1.09912665 | 0.276210623 | 0.452622714 |
| 215390_at   | 0.111441324 | 3.902211731 | 0.000248618 | 0.001586189 |
| 215391_at   | 0.00770016  | 0.295696373 | 0.768507852 | 0.867402967 |
| 215392_at   | 0.035874647 | 1.644763388 | 0.105376166 | 0.226514916 |
| 215393_s_at | -0.00186925 | -0.05207295 | 0.958647776 | 0.978907883 |
| 215394_at   | -0.05302129 | -1.04526023 | 0.300197807 | 0.479552504 |
| 215395_x_at | -0.04712999 | -1.14595378 | 0.256475103 | 0.430043719 |
| 215396_at   | 0.02932676  | 0.714198902 | 0.477941111 | 0.653555186 |
| 215397_x_at | 0.050704894 | 1.331416809 | 0.188211201 | 0.346401605 |
| 215398_at   | 0.002054699 | 0.064887586 | 0.948484485 | 0.973591727 |
| 215399_s_at | 0.094705732 | 2.817365083 | 0.00659094  | 0.024769784 |
| 215400_x_at | -0.01409927 | -0.33906482 | 0.735773662 | 0.846368329 |

|             |             |             |             |             |
|-------------|-------------|-------------|-------------|-------------|
| 215401_at   | 0.17453567  | 3.751018361 | 0.000405974 | 0.002402835 |
| 215402_at   | -0.00377415 | -0.12271702 | 0.90275133  | 0.948313139 |
| 215403_at   | -0.00869912 | -0.2652748  | 0.791729279 | 0.881349066 |
| 215404_x_at | 0.296264073 | 4.861224354 | 9.12E-06    | 9.90E-05    |
| 215405_at   | -0.00810729 | -0.15488217 | 0.877446758 | 0.934443371 |
| 215406_at   | 0.017660137 | 0.506472827 | 0.614426198 | 0.762542991 |
| 215407_s_at | 0.23824513  | 3.33345184  | 0.001491263 | 0.007129603 |
| 215408_at   | -0.04277135 | -0.86068773 | 0.392919958 | 0.575710536 |
| 215409_at   | -0.20240735 | -3.84739432 | 0.000297324 | 0.00184915  |
| 215410_at   | -0.03100697 | -0.96018227 | 0.340910934 | 0.523823253 |
| 215411_s_at | 0.253300398 | 3.265016539 | 0.001830951 | 0.008475285 |
| 215412_x_at | -0.07943059 | -1.61799734 | 0.111036888 | 0.235556111 |
| 215413_at   | 0.028804851 | 0.89270447  | 0.375668906 | 0.558573706 |
| 215414_at   | 0.143601001 | 2.889348607 | 0.005404544 | 0.021001642 |
| 215415_s_at | -0.01021006 | -0.28430115 | 0.777182396 | 0.872311137 |
| 215416_s_at | -0.10418045 | -1.80444701 | 0.076303682 | 0.176921616 |
| 215417_at   | -0.02163669 | -0.66741315 | 0.507129631 | 0.678462299 |
| 215418_at   | 0.100941629 | 1.831896152 | 0.072053425 | 0.169413492 |
| 215419_at   | -0.1145003  | -2.78350378 | 0.00722835  | 0.026740289 |
| 215420_at   | -0.0574324  | -1.08248729 | 0.283472877 | 0.460928781 |
| 215421_at   | -0.06650605 | -1.61174258 | 0.112394593 | 0.237702968 |
| 215422_at   | -0.024872   | -0.7153583  | 0.477229944 | 0.652902338 |
| 215423_at   | -0.34463853 | -5.82716529 | 2.55E-07    | 5.25E-06    |
| 215424_s_at | 0.002431107 | 0.038380606 | 0.969514755 | 0.984650686 |
| 215425_at   | 0.077633778 | 1.835501382 | 0.071510248 | 0.168384405 |
| 215426_at   | -0.00432223 | -0.14628649 | 0.884197596 | 0.938058401 |
| 215427_s_at | 0.02451762  | -0.509489   | 0.612323985 | 0.760884822 |
| 215428_at   | 0.100853595 | 2.189881765 | 0.032528581 | 0.090826399 |
| 215429_s_at | -0.07696739 | -2.01731863 | 0.04825295  | 0.12399499  |
| 215430_at   | 0.058329431 | 1.499119837 | 0.139213935 | 0.278839653 |
| 215431_at   | -0.01956736 | -0.44883343 | 0.655208208 | 0.791078594 |
| 215432_at   | -0.02224327 | -0.66265659 | 0.510150058 | 0.680992424 |
| 215433_at   | 0.074440421 | 2.704492676 | 0.008942264 | 0.031859668 |
| 215434_x_at | 0.023037932 | 0.335954589 | 0.738105753 | 0.847983916 |
| 215435_at   | 0.094847274 | 3.08852956  | 0.003073631 | 0.013111266 |
| 215436_at   | 0.364236607 | 6.457226581 | 2.29E-08    | 8.15E-07    |
| 215437_x_at | 0.072687509 | 2.900945775 | 0.005233022 | 0.0204499   |
| 215438_x_at | 0.096156481 | 2.574215894 | 0.012596666 | 0.042113271 |
| 215439_x_at | 0.188549007 | 4.689611001 | 1.68E-05    | 0.000164807 |
| 215440_s_at | -0.53125148 | -5.12292761 | 3.53E-06    | 4.52E-05    |
| 215441_at   | 0.01262126  | 0.708892074 | 0.481203859 | 0.656509479 |
| 215442_s_at | -0.01294211 | -0.70224376 | 0.485308872 | 0.660155961 |
| 215443_at   | 0.002648283 | 0.10192138  | 0.919167236 | 0.957361442 |
| 215444_s_at | 0.049599142 | 1.539286658 | 0.129120226 | 0.26378868  |
| 215445_x_at | 0.064776836 | 2.297444872 | 0.025184667 | 0.074151994 |
| 215446_s_at | 0.055733197 | 1.908934881 | 0.06117424  | 0.149292804 |
| 215447_at   | 0.052967408 | 1.731584076 | 0.088612512 | 0.198608221 |
| 215448_at   | -0.07990103 | -1.73568389 | 0.087878766 | 0.197459921 |
| 215449_at   | -0.04448306 | -0.75463271 | 0.453493229 | 0.632786518 |
| 215450_at   | -0.03239644 | -0.83338365 | 0.408014376 | 0.59022426  |
| 215451_s_at | 0.01637788  | 0.352437294 | 0.7257755   | 0.839828155 |
| 215452_x_at | 0.164503353 | 3.643024938 | 0.000572785 | 0.003213924 |
| 215454_x_at | -0.07946616 | -1.19763255 | 0.2358848   | 0.405024764 |
| 215455_at   | 0.08529333  | 1.923354499 | 0.059301146 | 0.145660172 |
| 215456_at   | 0.015817572 | 0.418061362 | 0.677431173 | 0.80653615  |
| 215457_at   | 0.042485235 | 2.073765482 | 0.042507766 | 0.112219097 |
| 215458_s_at | -0.12096889 | -3.39931451 | 0.00122129  | 0.006025823 |
| 215459_at   | 0.021007251 | 0.633501648 | 0.528872403 | 0.696416189 |
| 215460_x_at | 0.116250468 | 3.329480655 | 0.001509225 | 0.007197767 |
| 215461_at   | 0.026927481 | 0.601374074 | 0.549911607 | 0.712913831 |
| 215462_at   | 0.096572171 | 2.141748694 | 0.036384173 | 0.099250301 |
| 215463_at   | 0.034090999 | 0.853784336 | 0.396703185 | 0.579135826 |
| 215464_s_at | 0.343882739 | 4.060918512 | 0.000147101 | 0.001018158 |
| 215465_at   | 0.003757291 | 0.175975258 | 0.860920446 | 0.924221291 |
| 215466_at   | 0.015013755 | 0.48653522  | 0.628403516 | 0.772760434 |
| 215467_x_at | 0.139529018 | 3.561981127 | 0.000739064 | 0.003971893 |
| 215468_at   | 0.197386287 | 4.512318482 | 3.14E-05    | 0.000278515 |
| 215469_at   | -0.05176999 | -1.9523534  | 0.055681713 | 0.138814477 |
| 215470_at   | 0.022936299 | 0.346995409 | 0.729838553 | 0.842427351 |
| 215471_s_at | -0.01781437 | -0.26191739 | 0.794304142 | 0.882950895 |
| 215472_at   | -0.0504516  | -0.93621802 | 0.353005522 | 0.53615002  |
| 215473_at   | -0.10293346 | -2.55746457 | 0.013154142 | 0.043617642 |
| 215474_at   | 0.099705776 | 3.216277421 | 0.002115998 | 0.009557169 |
| 215475_at   | -0.00924198 | -0.3696343  | 0.712988204 | 0.831416501 |
| 215476_at   | 0.089571266 | 2.651865533 | 0.010282521 | 0.035654157 |

|             |             |             |             |             |
|-------------|-------------|-------------|-------------|-------------|
| 215477_at   | 0.029561084 | 0.782725478 | 0.436941888 | 0.617513071 |
| 215478_at   | -0.03827161 | -1.25516381 | 0.214404586 | 0.38010254  |
| 215479_at   | -0.01624317 | -0.33713575 | 0.737219812 | 0.84740176  |
| 215480_at   | -0.04490476 | -0.76378092 | 0.448063921 | 0.627640581 |
| 215481_s_at | -0.03431025 | -0.92117205 | 0.360739682 | 0.543859731 |
| 215482_s_at | 0.026963346 | 0.741693015 | 0.461237365 | 0.639499296 |
| 215483_at   | 0.167986791 | 1.97181472  | 0.053359978 | 0.134179043 |
| 215484_at   | 0.004324666 | 0.06791438  | 0.946085125 | 0.97221118  |
| 215485_s_at | -0.07943997 | -1.5908164  | 0.117034843 | 0.245058152 |
| 215486_at   | -0.05631375 | -1.90951159 | 0.061098373 | 0.149164671 |
| 215487_x_at | 0.016865518 | 0.43062037  | 0.668325081 | 0.800139891 |
| 215488_at   | -0.04552701 | -0.80196185 | 0.425817132 | 0.607266371 |
| 215489_x_at | 0.391288147 | 5.803787247 | 2.79E-07    | 5.62E-06    |
| 215490_at   | -0.00485328 | -0.12397008 | 0.901763462 | 0.947827202 |
| 215491_at   | 0.019876844 | 0.465575963 | 0.643245793 | 0.783343987 |
| 215492_x_at | -0.00034087 | -0.00830553 | 0.993401447 | 0.997061131 |
| 215493_x_at | -0.06362229 | -1.45815775 | 0.150139105 | 0.294415203 |
| 215494_at   | -0.00421935 | -0.2314951  | 0.817737101 | 0.898207288 |
| 215495_s_at | 0.02763636  | 0.80783307  | 0.422455759 | 0.604365966 |
| 215496_at   | -0.0285124  | -0.55231573 | 0.582833817 | 0.738638512 |
| 215497_s_at | -0.03250389 | -0.81192411 | 0.420123021 | 0.602275271 |
| 215498_s_at | 0.141981384 | 2.097779086 | 0.040249528 | 0.107392949 |
| 215499_at   | -0.00665999 | -0.12345183 | 0.902172019 | 0.948016657 |
| 215500_at   | 0.028812181 | 0.981584246 | 0.330342357 | 0.51287642  |
| 215501_s_at | 0.121168966 | 2.370617152 | 0.021069611 | 0.064236515 |
| 215502_at   | -0.06384223 | -1.0886528  | 0.280766613 | 0.457913939 |
| 215503_at   | -0.05000554 | -1.117642   | 0.26828374  | 0.443651924 |
| 215504_x_at | 0.140931893 | 3.071940069 | 0.003224253 | 0.013650271 |
| 215505_s_at | -0.07062489 | -1.88156447 | 0.064868032 | 0.156385914 |
| 215506_s_at | -0.86410872 | -4.61513986 | 2.19E-05    | 0.000206348 |
| 215507_x_at | -0.00955708 | -0.34352725 | 0.732432043 | 0.843873495 |
| 215508_at   | -0.0276443  | -1.2212974  | 0.226867096 | 0.394381121 |
| 215509_s_at | -0.10304971 | -1.7646278  | 0.082840494 | 0.188546922 |
| 215510_at   | -0.02967647 | -0.94194874 | 0.350088227 | 0.53319735  |
| 215511_at   | -0.01186975 | -0.22097884 | 0.825877517 | 0.903451895 |
| 215512_at   | -0.02139607 | -0.90498247 | 0.369182561 | 0.552432685 |
| 215513_at   | -0.07814445 | -1.44712144 | 0.153194535 | 0.298715976 |
| 215514_at   | 0.023091663 | 1.17246995  | 0.245755549 | 0.417172097 |
| 215515_at   | -0.00141789 | -0.02697705 | 0.978569756 | 0.989059649 |
| 215516_at   | 0.000216465 | 0.008665031 | 0.993115841 | 0.996975071 |
| 215517_at   | 0.014856595 | 0.430855742 | 0.668154893 | 0.800031573 |
| 215518_at   | -0.25675603 | -5.66309696 | 4.74E-07    | 8.67E-06    |
| 215519_x_at | -0.07510019 | -2.50411766 | 0.015081734 | 0.048832344 |
| 215520_at   | 0.023858896 | 0.800606113 | 0.426595586 | 0.607836828 |
| 215521_at   | -0.02243402 | -0.64821906 | 0.519376713 | 0.688680731 |
| 215522_at   | -0.47011665 | -6.46627328 | 2.21E-08    | 7.95E-07    |
| 215523_at   | -0.10289606 | -1.91817665 | 0.059968049 | 0.147015472 |
| 215524_x_at | -0.07706095 | -2.85050655 | 0.006017653 | 0.022955015 |
| 215525_at   | 0.069658272 | 1.534208471 | 0.130363216 | 0.26576922  |
| 215526_at   | 0.34992865  | 5.11719373  | 3.60E-06    | 4.61E-05    |
| 215527_at   | -0.34881272 | -5.75414657 | 3.36E-07    | 6.58E-06    |
| 215528_at   | 0.213733092 | 4.414680763 | 4.41E-05    | 0.000370626 |
| 215529_x_at | 0.258119391 | 5.977704807 | 1.44E-07    | 3.35E-06    |
| 215530_at   | 0.003121282 | 0.088370216 | 0.929883919 | 0.963493662 |
| 215531_s_at | -0.92147978 | -6.3950591  | 2.91E-08    | 9.74E-07    |
| 215532_x_at | 0.026149184 | 1.286482804 | 0.203336925 | 0.366172694 |
| 215533_s_at | -0.14328988 | -2.92523408 | 0.00489002  | 0.019371102 |
| 215534_at   | 0.014589415 | 0.374822564 | 0.709146325 | 0.828926285 |
| 215535_s_at | -0.14065765 | -3.50044268 | 0.000895054 | 0.004649747 |
| 215536_at   | 0.072168872 | 2.787239033 | 0.007155351 | 0.026525128 |
| 215537_x_at | 0.340214444 | 5.952881273 | 1.58E-07    | 3.59E-06    |
| 215538_at   | -0.04884079 | -0.94402218 | 0.349036595 | 0.532139712 |
| 215539_at   | -0.01869842 | -0.66918938 | 0.506004198 | 0.677581124 |
| 215540_at   | -0.020517   | -0.43007142 | 0.668722071 | 0.800431913 |
| 215541_s_at | -0.04030417 | -1.09667957 | 0.277270416 | 0.453861093 |
| 215542_at   | -0.02722972 | -0.85068064 | 0.398411407 | 0.580731307 |
| 215543_s_at | -0.63769025 | -8.51895284 | 7.72E-12    | 4.93E-09    |
| 215544_s_at | -0.00098661 | -0.02768362 | 0.978008606 | 0.988805552 |
| 215545_at   | 0.082312865 | 1.702621859 | 0.093941316 | 0.207626987 |
| 215546_at   | -0.00135311 | -0.03296311 | 0.973816093 | 0.986728718 |
| 215547_at   | -0.0534095  | -1.58840382 | 0.117579599 | 0.245933798 |
| 215548_s_at | -0.25421898 | -4.05183812 | 0.000151626 | 0.001042719 |
| 215549_x_at | -0.03242224 | -0.94517675 | 0.348451898 | 0.531556549 |
| 215550_at   | 0.069160446 | 1.776297581 | 0.080878192 | 0.185222042 |
| 215551_at   | 0.054475337 | 1.699745713 | 0.094484601 | 0.20853552  |

|             |             |             |             |             |
|-------------|-------------|-------------|-------------|-------------|
| 215552_s_at | -0.00525582 | -0.13851281 | 0.890310319 | 0.941267469 |
| 215553_x_at | 0.223887989 | 4.46498394  | 3.71E-05    | 0.000321124 |
| 215554_at   | -0.03385075 | -1.35624081 | 0.180228386 | 0.33644238  |
| 215555_at   | 0.04320674  | 0.678378693 | 0.500203365 | 0.672842975 |
| 215556_at   | -0.01474418 | -0.50874994 | 0.612838789 | 0.761207058 |
| 215557_at   | 0.048104855 | 1.262083741 | 0.211921607 | 0.376953407 |
| 215558_at   | 0.009867496 | 0.223483661 | 0.823936806 | 0.902224329 |
| 215559_at   | 0.055640938 | 1.641196111 | 0.106116764 | 0.22765795  |
| 215560_x_at | 0.08598742  | 2.998662357 | 0.003975802 | 0.016314987 |
| 215561_s_at | 0.021194479 | 0.939700079 | 0.351231062 | 0.534446175 |
| 215562_at   | 0.050742624 | 1.813495616 | 0.074879978 | 0.174435027 |
| 215563_s_at | -0.01200634 | -0.33620715 | 0.737916284 | 0.847914614 |
| 215564_at   | 0.016422713 | 0.646646092 | 0.52038727  | 0.689427517 |
| 215565_at   | -0.0272331  | -0.93210773 | 0.355107603 | 0.538225042 |
| 215566_x_at | -0.1106441  | -2.9627026  | 0.004401574 | 0.017760487 |
| 215567_at   | 0.106296436 | 3.844883166 | 0.000299761 | 0.001861461 |
| 215568_x_at | -0.08027565 | -2.22563589 | 0.029901593 | 0.08492387  |
| 215569_at   | 0.041267502 | 1.475747953 | 0.145368011 | 0.28763391  |
| 215570_s_at | -0.05132512 | -2.38606134 | 0.020282005 | 0.062294233 |
| 215571_at   | 0.676384652 | 7.018656306 | 2.60E-09    | 1.75E-07    |
| 215572_at   | 0.032886274 | 1.073427392 | 0.287482385 | 0.465631238 |
| 215573_at   | 0.030341218 | 1.929469196 | 0.058521718 | 0.144117953 |
| 215574_at   | 0.030257713 | 0.597956013 | 0.552174634 | 0.71465607  |
| 215575_at   | 0.062595594 | 1.655928065 | 0.103085432 | 0.222715562 |
| 215576_at   | 0.085626417 | 2.28147816  | 0.026172275 | 0.076490409 |
| 215577_at   | 0.234038741 | 5.745073142 | 3.48E-07    | 6.75E-06    |
| 215578_at   | 0.016307703 | 0.501533562 | 0.617875794 | 0.765315253 |
| 215579_at   | -0.09423858 | -1.5954547  | 0.115993234 | 0.243378856 |
| 215580_at   | 0.024796097 | 1.087483151 | 0.281278628 | 0.458541107 |
| 215581_s_at | -0.05466049 | -1.23112712 | 0.223196448 | 0.39035359  |
| 215582_x_at | 0.112107846 | 2.405829445 | 0.019312383 | 0.059917323 |
| 215583_at   | 0.113809929 | 2.264422335 | 0.027265033 | 0.078848769 |
| 215584_at   | -0.04035668 | -0.816287   | 0.417643852 | 0.600036616 |
| 215585_at   | -0.09003856 | -1.90432797 | 0.06178317  | 0.150491248 |
| 215586_at   | -0.02505877 | -1.27085287 | 0.20880581  | 0.373054137 |
| 215587_x_at | 0.187061164 | 3.840455926 | 0.000304106 | 0.001884774 |
| 215588_x_at | 0.292778051 | 5.393867465 | 1.30E-06    | 1.97E-05    |
| 215589_at   | 0.034350264 | 1.204655006 | 0.233182088 | 0.401857629 |
| 215590_x_at | 0.018719643 | 0.59407563  | 0.554749427 | 0.717074805 |
| 215591_at   | 0.06036502  | 2.641404546 | 0.010569858 | 0.036469398 |
| 215592_at   | 0.16356171  | 3.06716156  | 0.003268902 | 0.013808486 |
| 215593_at   | 0.013297144 | 0.355879937 | 0.723209207 | 0.83814794  |
| 215594_at   | 0.06046536  | 1.042100532 | 0.301647818 | 0.481232394 |
| 215595_x_at | 0.18062355  | 4.646462139 | 1.96E-05    | 0.000187909 |
| 215596_s_at | -0.05514849 | -0.78212353 | 0.437292754 | 0.617819612 |
| 215597_x_at | 0.052071364 | 1.924021443 | 0.059215705 | 0.145458299 |
| 215598_at   | 0.088482938 | 2.028432165 | 0.047071609 | 0.121651786 |
| 215599_at   | 0.537185444 | 4.631677777 | 2.07E-05    | 0.000196547 |
| 215600_x_at | 0.406611824 | 6.029104568 | 1.18E-07    | 2.88E-06    |
| 215601_at   | 0.007813253 | 0.195607348 | 0.845594591 | 0.915222192 |
| 215602_at   | 0.064393088 | 2.177955595 | 0.033448872 | 0.092850743 |
| 215603_x_at | 0.066432133 | 1.48118385  | 0.143917935 | 0.285611916 |
| 215604_x_at | 0.308488102 | 5.474818744 | 9.60E-07    | 1.54E-05    |
| 215605_at   | 0.171685546 | 3.679828213 | 0.00050968  | 0.002912604 |
| 215606_s_at | -0.22127275 | -2.56659852 | 0.012847454 | 0.042782089 |
| 215607_x_at | 0.065274643 | 1.642644866 | 0.105815481 | 0.227207911 |
| 215608_at   | 0.041094056 | 0.836969042 | 0.406012294 | 0.588374224 |
| 215609_at   | 0.165891952 | 2.854528607 | 0.005951305 | 0.022748521 |
| 215610_at   | 0.025024423 | 0.761744977 | 0.44926893  | 0.628697969 |
| 215611_at   | 0.138749268 | 4.108106819 | 0.000125611 | 0.000894771 |
| 215612_at   | 0.086487011 | 2.398387625 | 0.019672418 | 0.060771004 |
| 215613_at   | -0.09302523 | -2.24529768 | 0.028538196 | 0.08183171  |
| 215614_at   | -0.09063514 | -2.15363093 | 0.035396962 | 0.097112401 |
| 215615_x_at | 0.082323315 | 2.284455608 | 0.025985544 | 0.076034171 |
| 215616_s_at | -0.02125358 | -0.57146485 | 0.569871293 | 0.728571897 |
| 215617_at   | -0.00924734 | -0.39319461 | 0.695603424 | 0.819742333 |
| 215618_at   | 0.03702191  | 0.991271604 | 0.325630885 | 0.50780193  |
| 215619_at   | 0.012139367 | 0.83815697  | 0.405350284 | 0.587729251 |
| 215620_at   | 0.051253329 | 1.186480631 | 0.240223393 | 0.410196152 |
| 215621_s_at | 0.016037359 | 0.451997705 | 0.652940268 | 0.789596004 |
| 215622_x_at | 0.069679315 | 1.776827365 | 0.080790034 | 0.185086539 |
| 215623_x_at | 0.075967108 | 3.13474442  | 0.00268801  | 0.011713391 |
| 215624_at   | 0.102855973 | 2.040471684 | 0.045820079 | 0.119230532 |
| 215625_at   | -0.04548813 | -1.20840285 | 0.231748918 | 0.400142765 |
| 215626_at   | 0.337129962 | 3.836369864 | 0.000308169 | 0.001904939 |



|             |             |             |             |             |
|-------------|-------------|-------------|-------------|-------------|
| 215627_at   | 0.005640918 | 0.236411036 | 0.813938622 | 0.89570927  |
| 215628_x_at | 0.250401448 | 4.101842471 | 0.000128278 | 0.000911015 |
| 215629_s_at | 0.12125464  | 2.221520785 | 0.030194108 | 0.085526371 |
| 215630_at   | 0.033116019 | 1.134338989 | 0.261274    | 0.435589868 |
| 215631_s_at | 0.134732556 | 3.779883521 | 0.000369969 | 0.002217037 |
| 215632_at   | -0.00537989 | -0.20580582 | 0.837656322 | 0.91038568  |
| 215633_x_at | 0.078553928 | 2.090769931 | 0.040897631 | 0.108836307 |
| 215634_at   | -0.17234598 | -2.59484739 | 0.01193958  | 0.04030544  |
| 215635_at   | 0.171559258 | 4.786413548 | 1.19E-05    | 0.000123302 |
| 215636_at   | 0.155351349 | 4.657343976 | 1.89E-05    | 0.000181904 |
| 215637_at   | -0.00746438 | -0.24144071 | 0.810056903 | 0.893352366 |
| 215638_at   | -0.04373557 | -1.21612814 | 0.228815046 | 0.39644125  |
| 215639_at   | 0.03371593  | 0.860187132 | 0.393193541 | 0.575954689 |
| 215640_at   | 0.024904845 | 0.635282795 | 0.527718402 | 0.695574793 |
| 215641_at   | 0.008823568 | 0.314849372 | 0.75399504  | 0.858533951 |
| 215642_at   | 0.02075832  | 0.740027281 | 0.462239751 | 0.640332867 |
| 215643_at   | 0.011599344 | 0.418200171 | 0.67733026  | 0.806480457 |
| 215644_at   | 0.00023718  | 0.00663314  | 0.994730102 | 0.997475324 |
| 215645_at   | 0.19554499  | 1.762124971 | 0.083266466 | 0.189253092 |
| 215646_s_at | 0.651785517 | 5.115091591 | 3.63E-06    | 4.64E-05    |
| 215647_at   | 0.00068914  | 0.030975925 | 0.975394061 | 0.987536296 |
| 215648_at   | 0.06205823  | 1.833520487 | 0.071808269 | 0.168946344 |
| 215649_s_at | -0.05845902 | -1.34863068 | 0.182647724 | 0.33955458  |
| 215650_at   | 0.030433778 | 1.191898769 | 0.238108342 | 0.40759683  |
| 215651_at   | 0.21461102  | 4.194503748 | 9.39E-05    | 0.000697896 |
| 215652_at   | -0.02829528 | -0.47515831 | 0.636441453 | 0.778432321 |
| 215653_at   | -0.05202714 | -0.99296468 | 0.324812077 | 0.507038119 |
| 215654_at   | 0.132627871 | 2.844771699 | 0.006113438 | 0.023268761 |
| 215655_at   | -0.01617779 | -0.87121314 | 0.387195114 | 0.569865113 |
| 215656_at   | -0.01903585 | -0.99670887 | 0.323006191 | 0.504977531 |
| 215657_at   | -0.02476666 | -1.00627491 | 0.318422876 | 0.499769696 |
| 215658_at   | 0.013744518 | 0.524640502 | 0.601813409 | 0.752932223 |
| 215659_at   | -0.01327058 | -0.34868048 | 0.728579598 | 0.841626287 |
| 215660_s_at | -0.0510239  | -1.01730249 | 0.313193775 | 0.494218494 |
| 215661_at   | -0.03082397 | -0.62513271 | 0.5343122   | 0.7009358   |
| 215662_at   | -0.03993566 | -0.62987843 | 0.53122394  | 0.698372085 |
| 215663_at   | -0.01135398 | -0.53306419 | 0.59600623  | 0.748701972 |
| 215664_s_at | -0.03746729 | -1.00509276 | 0.318986894 | 0.500444493 |
| 215665_at   | 0.01173351  | 0.575165745 | 0.56738242  | 0.72707464  |
| 215666_at   | 0.009263427 | 0.379979003 | 0.705335516 | 0.826287152 |
| 215667_x_at | -0.09954514 | -1.69318183 | 0.095734153 | 0.210525333 |
| 215668_s_at | -0.05029895 | -1.2193138  | 0.227613144 | 0.395094055 |
| 215669_at   | 0.053256025 | 1.012810609 | 0.315316715 | 0.496583466 |
| 215670_s_at | -0.05308367 | -1.53992484 | 0.128964688 | 0.263591412 |
| 215671_at   | 0.007294937 | 0.345713045 | 0.730797138 | 0.842987609 |
| 215672_s_at | 0.037878123 | 1.107957852 | 0.272409551 | 0.448367682 |
| 215673_at   | -0.01543778 | -0.57674528 | 0.566321803 | 0.726590385 |
| 215674_at   | 0.028292799 | 1.472464854 | 0.146249352 | 0.288917298 |
| 215675_at   | -0.06995768 | -1.31033011 | 0.19519999  | 0.355527002 |
| 215676_at   | 0.02478692  | 0.678154576 | 0.500344409 | 0.672907596 |
| 215677_s_at | 0.019016654 | 0.687349913 | 0.494575296 | 0.668083999 |
| 215678_at   | -0.01967818 | -0.42512915 | 0.67230051  | 0.802780122 |
| 215679_at   | 0.001648493 | 0.070950012 | 0.943679264 | 0.970855038 |
| 215680_at   | -0.04844889 | -0.98523675 | 0.328560664 | 0.511086743 |
| 215681_at   | 0.033725513 | 0.899232092 | 0.372211487 | 0.555477202 |
| 215682_at   | 0.05619982  | 1.538058901 | 0.129419876 | 0.264300774 |
| 215683_at   | 0.003549803 | 0.08382466  | 0.93348171  | 0.965430879 |
| 215684_s_at | 0.199625383 | 3.606235244 | 0.000643282 | 0.003540584 |
| 215685_s_at | -0.07643565 | -1.18781593 | 0.239700881 | 0.409569957 |
| 215686_x_at | -0.02633557 | -0.77758998 | 0.439940634 | 0.620442625 |
| 215687_x_at | -0.34209707 | -5.29325095 | 1.88E-06    | 2.69E-05    |
| 215688_at   | 0.057006511 | 1.352199955 | 0.181509957 | 0.338058134 |
| 215689_s_at | 0.000381618 | 0.008685358 | 0.993099692 | 0.996975071 |
| 215690_x_at | -0.1745138  | -3.17913188 | 0.002360731 | 0.010477239 |
| 215691_x_at | -0.0924105  | -1.34807558 | 0.18282516  | 0.339700746 |
| 215692_s_at | -0.18549561 | -5.3655281  | 1.44E-06    | 2.16E-05    |
| 215693_x_at | 0.106285789 | 3.758598134 | 0.000396207 | 0.002352817 |
| 215694_at   | 0.014262405 | 0.703195807 | 0.48471984  | 0.659580484 |
| 215695_s_at | 0.384895885 | 3.351408685 | 0.001412536 | 0.006815184 |
| 215696_s_at | 0.084142632 | 1.524478266 | 0.132771473 | 0.269327462 |
| 215697_at   | -0.0475295  | -1.21062405 | 0.230902572 | 0.399052504 |
| 215698_at   | 0.164779977 | 2.627501963 | 0.010963064 | 0.0375478   |
| 215699_x_at | 0.030111843 | 0.809882456 | 0.421286214 | 0.603214157 |
| 215700_x_at | -0.09341162 | -2.23260068 | 0.029412204 | 0.083764044 |
| 215701_at   | -0.00628802 | -0.13928903 | 0.889699642 | 0.940967329 |

|             |              |             |             |             |
|-------------|--------------|-------------|-------------|-------------|
| 215702_s_at | -0.02114885  | -0.70299484 | 0.484844148 | 0.659684435 |
| 215703_at   | 0.013896489  | 0.775748977 | 0.441018586 | 0.621382507 |
| 215704_at   | -0.01795671  | -0.93616103 | 0.35303461  | 0.53615002  |
| 215705_at   | 0.027678111  | 0.57788775  | 0.56555527  | 0.725975092 |
| 215706_x_at | 0.063163708  | 1.527501674 | 0.132019414 | 0.268205302 |
| 215707_s_at | -0.47127053  | -4.17112751 | 0.000101592 | 0.000747134 |
| 215708_s_at | 0.023021493  | 1.007836863 | 0.317678679 | 0.499004338 |
| 215709_at   | 0.008014835  | 0.292152914 | 0.771202161 | 0.869014396 |
| 215710_at   | 0.037759315  | 1.228923368 | 0.224015566 | 0.3912049   |
| 215711_s_at | 0.092341079  | 1.837022074 | 0.071282169 | 0.167980106 |
| 215712_s_at | -0.12741899  | -1.95344129 | 0.055549687 | 0.138554895 |
| 215713_at   | 0.001914298  | 0.10065281  | 0.920169853 | 0.958070801 |
| 215714_s_at | -0.29606392  | -4.67993504 | 1.74E-05    | 0.000169744 |
| 215715_at   | -0.07953777  | -1.73300547 | 0.088357553 | 0.198147211 |
| 215716_s_at | -1.26324608  | -6.96351981 | 3.23E-09    | 2.03E-07    |
| 215717_s_at | -0.0088239   | -0.40240256 | 0.688852767 | 0.814643906 |
| 215718_s_at | 0.080988666  | 3.992408214 | 0.000184729 | 0.001232776 |
| 215719_x_at | 0.132354175  | 1.641475746 | 0.106058557 | 0.227598627 |
| 215720_s_at | 0.019980381  | 0.427108871 | 0.670866181 | 0.801759378 |
| 215721_at   | -0.01763984  | -0.5364878  | 0.593653554 | 0.746884121 |
| 215722_s_at | -0.07598538  | -1.79057307 | 0.07853053  | 0.180967641 |
| 215723_s_at | 0.02998543   | 0.733622358 | 0.466105625 | 0.643616619 |
| 215724_at   | 0.030748981  | 1.328243948 | 0.189250517 | 0.347816183 |
| 215725_at   | -0.01718168  | -0.46764688 | 0.641772624 | 0.782381399 |
| 215726_s_at | 0.109088013  | 1.673259179 | 0.099610095 | 0.21699216  |
| 215727_x_at | 0.008080173  | 0.20545379  | 0.837930056 | 0.910477901 |
| 215728_s_at | -0.31153885  | -5.77418247 | 3.12E-07    | 6.16E-06    |
| 215729_s_at | -0.0177062   | -0.86626419 | 0.389880354 | 0.572760923 |
| 215730_at   | -0.01142753  | -0.4823565  | 0.631350658 | 0.774918257 |
| 215731_s_at | 0.034536505  | 0.798246225 | 0.427952642 | 0.609207183 |
| 215732_s_at | 0.041686638  | 0.827770743 | 0.411160718 | 0.593392799 |
| 215733_x_at | 0.005385364  | 0.176101168 | 0.860821975 | 0.92420438  |
| 215734_at   | -0.140912981 | 2.708825821 | 0.008839372 | 0.031553451 |
| 215735_s_at | -0.25264646  | -3.7955507  | 0.000351729 | 0.002124937 |
| 215736_at   | -0.07687165  | -2.4509101  | 0.017254928 | 0.05463001  |
| 215737_x_at | 0.107844253  | 2.653328182 | 0.010242919 | 0.035547176 |
| 215738_at   | 0.05046401   | 1.303225945 | 0.197597977 | 0.358591465 |
| 215739_s_at | -0.04497901  | -2.03944065 | 0.04592612  | 0.119465115 |
| 215740_at   | 0.011876976  | 0.345500146 | 0.730956325 | 0.843086097 |
| 215741_x_at | -0.08343007  | -1.6365413  | 0.107089503 | 0.229227649 |
| 215742_at   | 0.031811642  | 0.75664953  | 0.452293017 | 0.631644257 |
| 215743_at   | -0.00550272  | -0.09542719 | 0.924301291 | 0.960365463 |
| 215744_at   | 0.028443715  | 0.953266904 | 0.344372809 | 0.52720548  |
| 215745_at   | 0.079867451  | 1.866042792 | 0.067045432 | 0.160402448 |
| 215746_at   | -0.07120139  | -1.84274963 | 0.070428613 | 0.166451378 |
| 215747_s_at | 0.009888261  | 0.196548627 | 0.844861233 | 0.914759751 |
| 215748_at   | 0.069295965  | 1.495373479 | 0.140186313 | 0.280297365 |
| 215749_s_at | 0.15596522   | 3.544829911 | 0.000779721 | 0.00414654  |
| 215750_at   | 0.030423216  | 0.707927401 | 0.481798293 | 0.657019121 |
| 215751_at   | -0.03147566  | -1.6024299  | 0.114440919 | 0.240981604 |
| 215752_at   | -0.03151357  | -1.04150877 | 0.301919911 | 0.48154615  |
| 215753_at   | 0.002458579  | 0.078801385 | 0.937459232 | 0.967424424 |
| 215754_at   | 0.16899421   | 3.708261321 | 0.000465537 | 0.002695746 |
| 215755_at   | 0.062547331  | 2.022191323 | 0.047731886 | 0.122996967 |
| 215756_at   | -0.06332731  | -1.26019915 | 0.212595706 | 0.377746912 |
| 215757_at   | 0.04128346   | 1.93342281  | 0.058022418 | 0.143243545 |
| 215758_x_at | -0.12925206  | -3.75833963 | 0.000396537 | 0.00235446  |
| 215759_at   | -0.01840094  | -0.40476175 | 0.687127218 | 0.813313461 |
| 215760_s_at | 0.030712158  | 0.639155442 | 0.525213875 | 0.693642391 |
| 215761_at   | -0.04274175  | -0.71455151 | 0.477724761 | 0.653319309 |
| 215762_at   | -0.07164588  | -1.28250763 | 0.204717582 | 0.367838144 |
| 215763_at   | 0.012398512  | 0.503579955 | 0.616445532 | 0.764071221 |
| 215764_x_at | -0.13989388  | -3.51153258 | 0.000864807 | 0.00451551  |
| 215765_at   | -0.04668218  | -0.80203494 | 0.425775188 | 0.607266371 |
| 215766_at   | 0.049713411  | 1.162008638 | 0.249945574 | 0.422343664 |
| 215767_at   | -0.34188587  | -5.99781733 | 1.33E-07    | 3.16E-06    |
| 215768_at   | 0.14363229   | 3.933222421 | 0.000224565 | 0.001456221 |
| 215769_at   | -0.03966955  | -1.0614979  | 0.292821468 | 0.471323815 |
| 215770_at   | -0.06721485  | -2.1520131  | 0.035529982 | 0.097399617 |
| 215771_x_at | -0.07715685  | -1.60459259 | 0.113963039 | 0.240145039 |
| 215772_x_at | 0.345278253  | 3.675229366 | 0.000517186 | 0.002946721 |
| 215773_x_at | -0.12091882  | -2.58219287 | 0.012338811 | 0.041387433 |
| 215774_s_at | -0.03779211  | -1.02035953 | 0.311754498 | 0.492677936 |
| 215775_at   | -0.0311042   | -0.78364991 | 0.436403375 | 0.616933626 |
| 215776_at   | -0.02746059  | -0.75724627 | 0.451938252 | 0.631267169 |

|             |             |             |             |             |
|-------------|-------------|-------------|-------------|-------------|
| 215777_at   | 0.026953276 | 0.534496867 | 0.595021178 | 0.74795203  |
| 215778_x_at | -0.02851018 | -0.38930665 | 0.69846131  | 0.821550502 |
| 215779_s_at | 0.02815574  | 1.179827039 | 0.242839258 | 0.413499242 |
| 215780_s_at | 0.133016615 | 1.52706729  | 0.132127256 | 0.268386117 |
| 215781_s_at | -0.05087813 | -1.75132931 | 0.08512475  | 0.192656876 |
| 215782_at   | -0.01293519 | -0.48830459 | 0.627157453 | 0.771848898 |
| 215783_s_at | 0.051852486 | 0.98279349  | 0.329751778 | 0.512226424 |
| 215784_at   | -0.0290015  | -0.97520636 | 0.33346885  | 0.516110034 |
| 215785_s_at | -0.44504241 | -5.10150001 | 3.81E-06    | 4.83E-05    |
| 215786_at   | 0.13071409  | 3.605476988 | 0.000644818 | 0.003546931 |
| 215787_at   | -0.0703175  | -1.36054104 | 0.178872137 | 0.334525403 |
| 215788_at   | -0.07940982 | -1.58392589 | 0.118596116 | 0.247446201 |
| 215789_s_at | -0.07358967 | -1.78432964 | 0.079550196 | 0.182836583 |
| 215790_at   | -0.03398223 | -0.78494124 | 0.435651785 | 0.616221977 |
| 215791_at   | 0.067885993 | 1.655342046 | 0.103204651 | 0.222876166 |
| 215792_s_at | -0.09710887 | -2.98955782 | 0.004079819 | 0.016671415 |
| 215793_at   | -0.04331434 | -1.32636932 | 0.189866613 | 0.348624433 |
| 215794_x_at | -0.20468494 | -2.1812114  | 0.033195395 | 0.092365121 |
| 215795_at   | 0.092812362 | 2.849976442 | 0.006026449 | 0.022984642 |
| 215796_at   | -0.05474408 | -2.16506679 | 0.034469057 | 0.095127275 |
| 215797_at   | -0.02116882 | -0.6925158  | 0.491350312 | 0.665426991 |
| 215798_at   | 0.086518154 | 1.913013454 | 0.060639406 | 0.148254724 |
| 215799_at   | -0.04688308 | -0.81877221 | 0.416235612 | 0.598552141 |
| 215800_at   | -0.06286238 | -1.67126696 | 0.100004646 | 0.217627095 |
| 215801_at   | 0.030265209 | 1.054889313 | 0.295808375 | 0.474711603 |
| 215802_at   | 0.104610519 | 3.935695683 | 0.000222747 | 0.001446315 |
| 215803_at   | -0.01719713 | -0.97197862 | 0.335058552 | 0.51784199  |
| 215804_at   | 0.063909101 | 1.643770109 | 0.105581956 | 0.226785964 |
| 215805_at   | -0.01534692 | -0.38436699 | 0.702098575 | 0.824058934 |
| 215806_x_at | 0.203257131 | 2.162398381 | 0.034683643 | 0.095613212 |
| 215807_s_at | 0.42779531  | 5.563220219 | 6.90E-07    | 1.17E-05    |
| 215808_at   | -0.01181599 | -0.26132083 | 0.794761892 | 0.883327908 |
| 215809_at   | 0.027487828 | 0.755985718 | 0.452687848 | 0.631978425 |
| 215810_x_at | 0.104269215 | 2.692027383 | 0.009244406 | 0.032766356 |
| 215811_at   | 0.01232137  | 0.266563768 | 0.79074136  | 0.880773659 |
| 215812_s_at | 0.132802209 | 2.209671703 | 0.031050511 | 0.087513997 |
| 215813_s_at | 0.061365338 | 1.126757987 | 0.2644404   | 0.439345994 |
| 215814_at   | -0.03942477 | -0.94911531 | 0.346462138 | 0.529479068 |
| 215815_at   | 0.012375681 | 0.312639685 | 0.755664959 | 0.859588429 |
| 215816_at   | 0.017823029 | 0.495730526 | 0.621939715 | 0.767711163 |
| 215817_at   | -0.04654563 | -1.16206476 | 0.24992296  | 0.422337389 |
| 215818_at   | -0.08451248 | -1.38477927 | 0.171372909 | 0.324280902 |
| 215819_s_at | 0.038009536 | 0.745106616 | 0.459187065 | 0.637724932 |
| 215820_x_at | -0.0371837  | -1.34169329 | 0.184874641 | 0.342245928 |
| 215821_x_at | 0.042519952 | 0.732563036 | 0.466746779 | 0.644180318 |
| 215822_x_at | -0.04575702 | -1.09317616 | 0.27879263  | 0.455698165 |
| 215823_x_at | 0.21812051  | 3.347810603 | 0.001427989 | 0.00687712  |
| 215824_at   | 0.04483892  | 1.39346637  | 0.168744715 | 0.320739114 |
| 215825_at   | 0.043877803 | 1.276142014 | 0.206943038 | 0.370649971 |
| 215826_x_at | -0.04611122 | -1.47010416 | 0.146885664 | 0.289777262 |
| 215827_x_at | -0.00324235 | -0.07367129 | 0.94152299  | 0.969641107 |
| 215828_at   | 0.327553066 | 6.728994853 | 8.01E-09    | 3.81E-07    |
| 215829_at   | -0.01708981 | -0.68218182 | 0.497813235 | 0.670856022 |
| 215830_at   | -0.025927   | -0.7398886  | 0.462323261 | 0.640389003 |
| 215831_at   | -0.0176459  | -0.79904853 | 0.427490987 | 0.608709211 |
| 215832_x_at | -0.04298562 | -0.75690473 | 0.452141278 | 0.631491546 |
| 215833_s_at | 0.055544582 | 1.313942561 | 0.193989047 | 0.354026644 |
| 215834_x_at | 0.000829597 | 0.028189967 | 0.97760648  | 0.988734499 |
| 215835_at   | -0.02805525 | -0.66706104 | 0.507352888 | 0.67866225  |
| 215836_s_at | 0.04878285  | 0.752776752 | 0.454599336 | 0.633696813 |
| 215837_x_at | -0.04800753 | -1.23765196 | 0.220784102 | 0.387682032 |
| 215838_at   | 0.001447564 | 0.047437358 | 0.96232605  | 0.980849202 |
| 215839_at   | -0.020682   | -0.39863144 | 0.691614464 | 0.816767243 |
| 215840_at   | 0.05824526  | 1.474427809 | 0.145721898 | 0.288181028 |
| 215841_at   | -0.01368861 | -0.46723462 | 0.642065776 | 0.782495459 |
| 215842_s_at | -0.05242848 | -1.11407056 | 0.269800154 | 0.445465496 |
| 215843_s_at | -0.02474346 | -0.463637   | 0.6446264   | 0.784181493 |
| 215844_at   | -0.06803967 | -1.05178121 | 0.297220368 | 0.476208959 |
| 215845_x_at | -0.06490823 | -1.85421633 | 0.068745604 | 0.163478482 |
| 215846_at   | 0.059171732 | 2.492420907 | 0.015537083 | 0.050064837 |
| 215847_at   | 0.024515395 | 0.312482018 | 0.755784156 | 0.859588429 |
| 215848_at   | 0.039395664 | 0.855083567 | 0.395989457 | 0.578688908 |
| 215849_x_at | -0.0360926  | -1.22884518 | 0.224044668 | 0.3912049   |
| 215850_s_at | -0.01772007 | -0.85356624 | 0.396823073 | 0.579234091 |
| 215851_at   | 0.012914401 | 0.465012787 | 0.643646663 | 0.783498407 |

|             |             |             |             |             |
|-------------|-------------|-------------|-------------|-------------|
| 215852_x_at | 0.076793625 | 2.174599993 | 0.033711893 | 0.093476358 |
| 215853_at   | -0.00151711 | -0.03678014 | 0.970785388 | 0.985214037 |
| 215854_at   | 0.003732337 | 0.143387817 | 0.886476121 | 0.939234631 |
| 215855_s_at | 0.077351014 | 1.882804206 | 0.06469673  | 0.156057117 |
| 215856_at   | 0.055271691 | 1.017642452 | 0.313033498 | 0.494035352 |
| 215857_at   | -0.01022583 | -0.26301307 | 0.793463585 | 0.882435143 |
| 215858_at   | -0.04464868 | -1.02828553 | 0.308043743 | 0.488454531 |
| 215859_at   | -0.04466755 | -1.67294913 | 0.099671416 | 0.217087075 |
| 215860_at   | -0.07540276 | -1.80743733 | 0.075830701 | 0.176126477 |
| 215861_at   | 0.067317682 | 1.404487444 | 0.165455181 | 0.316167392 |
| 215862_at   | 0.016857891 | 0.422610712 | 0.674126923 | 0.804123107 |
| 215863_at   | 0.052661589 | 0.853954937 | 0.396609421 | 0.579135826 |
| 215864_at   | 0.01221635  | 0.212306812 | 0.832604866 | 0.907424993 |
| 215865_at   | 0.078014797 | 2.169957444 | 0.034078781 | 0.094283079 |
| 215866_at   | 0.018833452 | 0.449944899 | 0.65441121  | 0.790564828 |
| 215867_x_at | -1.15978216 | -7.01062932 | 2.69E-09    | 1.78E-07    |
| 215868_x_at | 0.015027279 | 0.773055595 | 0.442598419 | 0.622818161 |
| 215869_at   | 0.009960291 | 0.211702566 | 0.833074087 | 0.907648637 |
| 215870_s_at | 0.104582582 | 1.643874114 | 0.105560392 | 0.226785964 |
| 215871_at   | 0.006733047 | 0.211221372 | 0.833447797 | 0.907900869 |
| 215872_at   | -0.02931152 | -0.81453375 | 0.418639055 | 0.601099295 |
| 215873_x_at | 0.014743338 | 0.412509219 | 0.681472402 | 0.809471484 |
| 215874_at   | 0.067466737 | 1.623638481 | 0.109823797 | 0.233614714 |
| 215875_at   | -0.00607179 | -0.15191498 | 0.879776111 | 0.935519616 |
| 215876_at   | 0.05768547  | 1.311473206 | 0.194816196 | 0.355028765 |
| 215877_at   | -0.04754365 | -1.16381306 | 0.249219224 | 0.421690287 |
| 215878_at   | -0.00127848 | -0.06481463 | 0.94854232  | 0.973612168 |
| 215879_at   | -0.02543156 | -1.27885784 | 0.205991378 | 0.369360577 |
| 215880_at   | -0.0257169  | -0.87496908 | 0.385164928 | 0.567775609 |
| 215881_x_at | 0.02600646  | 0.593795751 | 0.554935371 | 0.71721144  |
| 215882_at   | -0.00027206 | -0.00921036 | 0.992682601 | 0.996780154 |
| 215883_at   | -0.00066977 | -0.01771484 | 0.985926553 | 0.993171111 |
| 215884_s_at | -0.3660984  | -4.15630286 | 0.000106806 | 0.000778692 |
| 215885_at   | -0.01197488 | -0.21479112 | 0.830676345 | 0.906227167 |
| 215886_x_at | -0.01200675 | -0.43758071 | 0.663299752 | 0.796822636 |
| 215887_at   | 0.223516281 | 4.175225393 | 0.000100194 | 0.000737706 |
| 215888_at   | 0.092274215 | 2.671260834 | 0.009768573 | 0.034238653 |
| 215889_at   | -0.01118629 | -0.43296027 | 0.666633968 | 0.799281161 |
| 215890_at   | -0.03166148 | -0.91970877 | 0.361497638 | 0.544653354 |
| 215891_s_at | -0.10727956 | -1.96290612 | 0.054412278 | 0.13632658  |
| 215892_at   | 0.071024595 | 2.205167921 | 0.031381593 | 0.088257891 |
| 215893_x_at | 0.068839078 | 3.19223762  | 0.002271498 | 0.010143662 |
| 215894_at   | -0.03131229 | -1.03993678 | 0.302643535 | 0.482304409 |
| 215895_x_at | 0.027459181 | 1.153579356 | 0.253358771 | 0.42630587  |
| 215896_at   | -0.07342006 | -1.15829748 | 0.251444221 | 0.424410648 |
| 215897_at   | -0.02069234 | -0.94091712 | 0.350612225 | 0.533777134 |
| 215898_at   | 0.145882741 | 3.128992805 | 0.002733403 | 0.011877615 |
| 215899_at   | 0.0089632   | 0.278676764 | 0.781474525 | 0.875110485 |
| 215900_at   | -0.04715504 | -1.10484022 | 0.273747209 | 0.449939696 |
| 215901_at   | 0.01347959  | 0.431441126 | 0.667731701 | 0.799824856 |
| 215902_at   | 0.01190605  | 0.403490385 | 0.688056908 | 0.81403092  |
| 215903_s_at | 0.155464434 | 3.370989687 | 0.001331173 | 0.00648211  |
| 215904_at   | 0.01945989  | 0.619028714 | 0.538297988 | 0.704365793 |
| 215905_s_at | -0.03153766 | -0.98132396 | 0.330469568 | 0.512988924 |
| 215906_at   | 0.024120181 | 0.486851341 | 0.628180811 | 0.772533964 |
| 215907_at   | 0.24667084  | 5.515979724 | 8.23E-07    | 1.37E-05    |
| 215908_at   | 0.160927707 | 2.713587598 | 0.008727553 | 0.031229127 |
| 215909_x_at | -0.20740356 | -3.8202053  | 0.000324761 | 0.001989069 |
| 215910_s_at | -0.17738036 | -4.1835121  | 9.74E-05    | 0.000720522 |
| 215911_x_at | -0.09737463 | -3.3676543  | 0.001344712 | 0.006535928 |
| 215912_at   | -0.01297845 | -0.30101965 | 0.764465631 | 0.864615895 |
| 215913_s_at | -0.37013415 | -5.9275551  | 1.74E-07    | 3.88E-06    |
| 215914_at   | 0.029059679 | 0.983495938 | 0.329409033 | 0.511889726 |
| 215915_at   | 0.054851482 | 1.11690469  | 0.268596304 | 0.444086642 |
| 215916_at   | 0.052218869 | 1.143631193 | 0.257429672 | 0.431191324 |
| 215917_at   | -0.00352232 | -0.23483383 | 0.815156824 | 0.896453869 |
| 215918_s_at | 0.253995811 | 3.257585403 | 0.00187194  | 0.008633151 |
| 215919_s_at | -0.02836746 | -1.03388753 | 0.305439175 | 0.485426821 |
| 215920_s_at | 0.118900828 | 2.102803242 | 0.039790482 | 0.106460501 |
| 215921_at   | 0.118812601 | 1.71256582  | 0.092082735 | 0.204510341 |
| 215922_at   | 0.050577158 | 2.032012363 | 0.046696395 | 0.120940848 |
| 215923_s_at | 0.095282351 | 2.326594504 | 0.02346668  | 0.070137955 |
| 215924_at   | -0.01458056 | -0.91560133 | 0.363630692 | 0.546768466 |
| 215925_s_at | 0.025400474 | 0.59486067  | 0.554228035 | 0.716587379 |
| 215926_x_at | -0.01795783 | -0.51363563 | 0.609439196 | 0.758628988 |

|             |             |             |             |              |
|-------------|-------------|-------------|-------------|--------------|
| 215927_at   | 0.064044481 | 2.012296053 | 0.048795165 | 0.125100592  |
| 215928_at   | -0.09846398 | -1.91223115 | 0.060741683 | 0.148472288  |
| 215929_at   | -0.03554227 | -1.45308939 | 0.151536325 | 0.296413753  |
| 215930_s_at | -0.02035938 | -1.12863191 | 0.263655193 | 0.438506721  |
| 215931_s_at | -0.06805724 | -1.88331486 | 0.064626282 | 0.155904016  |
| 215932_at   | 0.043907553 | 0.886895261 | 0.378762861 | 0.56137394   |
| 215933_s_at | 0.044055134 | 1.060059521 | 0.293469801 | 0.472027365  |
| 215934_at   | 0.015681246 | 0.286029934 | 0.775864501 | 0.871688093  |
| 215935_at   | 0.049166739 | 1.327880988 | 0.189369686 | 0.347955022  |
| 215936_s_at | 0.017951005 | 0.478163422 | 0.63431398  | 0.777082875  |
| 215937_at   | 0.035338531 | 1.525720263 | 0.132462121 | 0.268834163  |
| 215938_s_at | 0.040206844 | 1.247945905 | 0.217017339 | 0.383149657  |
| 215939_at   | 8.09E-05    | 0.0033349   | 0.997350473 | 0.998747055  |
| 215940_at   | 0.0445425   | 2.015245927 | 0.048476078 | 0.124439568  |
| 215941_at   | 0.006953104 | 0.212540027 | 0.832423782 | 0.907338268  |
| 215942_s_at | 0.029879016 | 0.732219634 | 0.466954731 | 0.644303228  |
| 215943_at   | 0.123237446 | 2.361291013 | 0.021558347 | 0.065458636  |
| 215944_at   | -0.00690191 | -0.2208234  | 0.825997981 | 0.903507312  |
| 215945_s_at | 0.064489335 | 0.955894635 | 0.343054649 | 0.525926124  |
| 215946_x_at | 0.087040067 | 2.182101409 | 0.033126398 | 0.092207586  |
| 215947_s_at | -0.18171576 | -4.19935658 | 9.23E-05    | 0.000688255  |
| 215948_x_at | 0.004080612 | 0.101534949 | 0.919472639 | 0.957523329  |
| 215949_x_at | 0.038770984 | 0.741839507 | 0.46114927  | 0.639422906  |
| 215951_at   | -0.0776706  | -1.659124   | 0.102437229 | 0.22167948   |
| 215952_s_at | -0.38882693 | -4.27745105 | 7.08E-05    | 0.000550646  |
| 215953_at   | -0.00714039 | -0.18040712 | 0.857455779 | 0.922229771  |
| 215954_s_at | -0.02486139 | -0.64682284 | 0.520273669 | 0.689382818  |
| 215955_x_at | -0.05086575 | -1.61325619 | 0.112064811 | 0.237151406  |
| 215956_at   | 0.00497636  | 0.190450379 | 0.849614849 | 0.917506025  |
| 215957_at   | -0.00968559 | -0.56368518 | 0.575120522 | 0.732649946  |
| 215958_at   | -0.05930935 | -1.47444061 | 0.145718463 | 0.288181028  |
| 215959_at   | 0.019962411 | 0.571977967 | 0.569525902 | 0.728380358  |
| 215960_at   | 0.008451892 | 0.263016003 | 0.793461337 | 0.882435143  |
| 215961_at   | -0.01644712 | -0.4422584  | 0.65993118  | 0.794377405  |
| 215962_at   | 0.031177765 | 1.131721541 | 0.262364192 | 0.436869614  |
| 215963_x_at | -0.04551547 | -1.55674764 | 0.124918224 | 0.257404456  |
| 215964_at   | 0.019986386 | 0.714202095 | 0.477939152 | 0.653555186  |
| 215965_at   | 0.012189548 | 0.623390417 | 0.535448324 | 0.701820477  |
| 215966_x_at | -0.02241045 | -1.07170014 | 0.288251224 | 0.466386348  |
| 215967_s_at | -0.0347938  | -0.58632592 | 0.559909633 | 0.721491258  |
| 215968_at   | 0.070419085 | 1.838262755 | 0.071096541 | 0.167618536  |
| 215969_at   | 0.078390166 | 2.904729473 | 0.005178161 | 0.020282417  |
| 215970_at   | 0.000311031 | 0.012463193 | 0.990098427 | 0.995332094  |
| 215971_at   | -0.01936078 | -0.30754328 | 0.759520901 | 0.861513662  |
| 215972_at   | -0.00385152 | -0.06059598 | 0.951887287 | 0.975325477  |
| 215973_at   | 0.00793388  | 0.222653919 | 0.82457956  | 0.902618538  |
| 215974_at   | -0.03348878 | -0.95376229 | 0.344124054 | 0.526938783  |
| 215975_x_at | 0.003908203 | 0.095087918 | 0.924569595 | 0.960532258  |
| 215976_at   | -0.01744595 | -0.62827967 | 0.532263286 | 0.699294787  |
| 215977_x_at | 0.019942233 | 0.510197517 | 0.611830634 | 0.760546677  |
| 215978_x_at | 0.398422672 | 5.572994349 | 6.65E-07    | 1.14E-05     |
| 215979_s_at | 0.044249666 | 1.032760114 | 0.305962142 | 0.486050547  |
| 215980_s_at | -0.04314494 | -1.31424658 | 0.193887394 | 0.353912789  |
| 215981_at   | -0.00674018 | -0.28130658 | 0.779466776 | 0.87386881   |
| 215982_s_at | 0.002254596 | 0.051795617 | 0.958867808 | 0.978964872  |
| 215983_s_at | -0.10690081 | -2.56664076 | 0.012846051 | 0.042782089  |
| 215984_s_at | -0.04909158 | -1.31343043 | 0.194160375 | 0.354142205  |
| 215985_at   | 0.160501346 | 2.367067241 | 0.021254465 | 0.064727324  |
| 215986_at   | -0.00441152 | -0.22511702 | 0.822671889 | 0.901479762  |
| 215987_at   | 0.051234177 | 1.743762603 | 0.086447626 | 0.194940073  |
| 215988_s_at | -0.01943162 | -0.60508226 | 0.547461809 | 0.710965397  |
| 215989_at   | -0.0575459  | -1.09967235 | 0.275974679 | 0.452386311  |
| 215990_s_at | 0.258262167 | 2.55924096  | 0.013093981 | 0.043460544  |
| 215991_s_at | -0.0463008  | -1.682734   | 0.097751047 | 0.213803548  |
| 215992_s_at | 0.041604344 | 1.499090091 | 0.139221634 | 0.278842578  |
| 215993_at   | 0.001890698 | 0.07214501  | 0.942732323 | 0.970439307  |
| 215994_x_at | 0.106403817 | 3.318709539 | 0.001558978 | 0.007398729  |
| 215995_x_at | 0.057401849 | 1.893189602 | 0.063276702 | 0.153326956  |
| 215996_at   | 0.095768674 | 2.342405868 | 0.022579132 | 0.067921288  |
| 215997_s_at | 0.044791357 | 1.573195879 | 0.121060663 | 0.251227858  |
| 215998_at   | 0.004652234 | 0.129444871 | 0.897449187 | 0.945020226  |
| 215999_at   | -0.055475   | -1.33592993 | 0.186740315 | 0.3444668298 |
| 216000_at   | -0.08779246 | -2.51888141 | 0.014524213 | 0.047294924  |
| 216001_at   | 0.061872708 | 1.37798383  | 0.173450624 | 0.32715152   |
| 216002_at   | 0.043499392 | 1.221396703 | 0.226829794 | 0.394331616  |

|             |             |             |             |             |
|-------------|-------------|-------------|-------------|-------------|
| 216003_at   | -0.04822291 | -0.93307282 | 0.35461331  | 0.537707066 |
| 216004_s_at | -0.00234851 | -0.10707274 | 0.915097218 | 0.954807244 |
| 216005_at   | 0.614571483 | 4.697595225 | 1.64E-05    | 0.000161369 |
| 216006_at   | 0.143110761 | 4.312084863 | 6.29E-05    | 0.000498186 |
| 216007_at   | -0.05680843 | -1.43202085 | 0.157453503 | 0.304769684 |
| 216008_s_at | -0.03214559 | -0.89490706 | 0.374500016 | 0.557607767 |
| 216009_at   | -0.02440301 | -0.76524017 | 0.447201397 | 0.626929328 |
| 216010_x_at | 0.017319402 | 0.357755687 | 0.721812283 | 0.837342659 |
| 216011_at   | 0.067550203 | 1.475422492 | 0.145455193 | 0.287757826 |
| 216012_at   | 0.045094571 | 0.699171277 | 0.487212536 | 0.661620626 |
| 216013_at   | -0.02034207 | -0.61426854 | 0.541416871 | 0.706584984 |
| 216014_s_at | 0.02494921  | 0.652905873 | 0.516371834 | 0.686236699 |
| 216015_s_at | -0.0114964  | -0.32518055 | 0.746203263 | 0.853167885 |
| 216016_at   | 0.000274118 | 0.01087912  | 0.991356864 | 0.99594751  |
| 216017_s_at | -0.11288836 | -3.06025238 | 0.003334482 | 0.014043033 |
| 216018_at   | 0.042826656 | 0.908027579 | 0.367584981 | 0.550789998 |
| 216019_x_at | 0.051656222 | 1.479033611 | 0.144490165 | 0.286442267 |
| 216020_at   | -0.03822753 | -1.62777624 | 0.108940848 | 0.232245009 |
| 216021_s_at | -0.05001976 | -1.8042766  | 0.07633071  | 0.176965922 |
| 216022_at   | 0.089538554 | 2.669208017 | 0.009821837 | 0.034397559 |
| 216023_at   | 0.000905051 | 0.020378768 | 0.983810492 | 0.992068107 |
| 216024_at   | -0.02745542 | -0.65239831 | 0.516696801 | 0.686418871 |
| 216025_x_at | -0.0327099  | -0.69252285 | 0.491345919 | 0.665426991 |
| 216026_s_at | 0.004948476 | 0.159960436 | 0.873462663 | 0.931932614 |
| 216027_at   | 0.018480493 | 0.914274138 | 0.364321647 | 0.547598075 |
| 216028_at   | 0.111119117 | 1.580959212 | 0.119273454 | 0.248349292 |
| 216029_at   | 0.017253411 | 0.441494097 | 0.660481104 | 0.794846689 |
| 216030_s_at | 0.009634318 | 0.562251837 | 0.5760902   | 0.733375772 |
| 216031_x_at | -0.02183525 | -0.45285513 | 0.652326288 | 0.789241103 |
| 216032_s_at | -0.06594274 | -1.44494096 | 0.153803908 | 0.299525218 |
| 216033_s_at | 0.216621903 | 3.143213552 | 0.002622453 | 0.011459002 |
| 216034_at   | -0.00964403 | -0.25504117 | 0.799584799 | 0.886571659 |
| 216035_x_at | 0.331223481 | 3.473487178 | 0.000972824 | 0.004980805 |
| 216036_x_at | -0.03346081 | -1.01632925 | 0.313652927 | 0.494737163 |
| 216037_x_at | 0.319844126 | 4.06879849  | 0.000143281 | 0.000996035 |
| 216038_x_at | 0.026323269 | 0.705408692 | 0.483352258 | 0.658396194 |
| 216039_at   | -0.11567698 | -1.14556719 | 0.256633812 | 0.430229128 |
| 216040_x_at | 0.104616721 | 2.337993018 | 0.022823781 | 0.068537285 |
| 216041_x_at | 0.074788688 | 2.193790384 | 0.032231848 | 0.090245943 |
| 216042_at   | -0.00572549 | -0.14563852 | 0.884706855 | 0.9383907   |
| 216043_x_at | 0.043360324 | 1.289465274 | 0.202305627 | 0.36479496  |
| 216044_x_at | -0.12555314 | -1.79626648 | 0.077610224 | 0.179342545 |
| 216045_at   | 0.040627538 | 1.578529975 | 0.119830398 | 0.249218678 |
| 216046_at   | -0.03842232 | -1.3492372  | 0.182454004 | 0.339307355 |
| 216047_x_at | -0.04028884 | -0.67683284 | 0.501176659 | 0.67353194  |
| 216048_s_at | 0.591393321 | 5.11962404  | 3.57E-06    | 4.57E-05    |
| 216049_at   | 0.003136768 | 0.116539271 | 0.907623874 | 0.951034563 |
| 216050_at   | -0.01727543 | -0.92760849 | 0.357417868 | 0.540492635 |
| 216051_x_at | 0.027743619 | 0.475221585 | 0.636396627 | 0.778432321 |
| 216052_x_at | 0.024689109 | 0.691440917 | 0.49202039  | 0.665991357 |
| 216053_x_at | 0.006052087 | 0.178684632 | 0.858802026 | 0.923033528 |
| 216054_x_at | 0.002221346 | 0.063634233 | 0.949478167 | 0.974062948 |
| 216055_at   | 0.002452359 | 0.058612667 | 0.953460155 | 0.976080838 |
| 216056_at   | 0.148273092 | 3.4438596   | 0.001065692 | 0.005371369 |
| 216057_at   | -0.02228657 | -0.99888398 | 0.321960187 | 0.503923957 |
| 216058_s_at | -0.00801821 | -0.23959515 | 0.811480689 | 0.894338208 |
| 216059_at   | 0.017995804 | 0.466351327 | 0.642694061 | 0.78292457  |
| 216060_s_at | 0.771836565 | 6.422179759 | 2.62E-08    | 8.96E-07    |
| 216061_x_at | 0.090162596 | 1.90598966  | 0.061562941 | 0.150052953 |
| 216062_at   | -0.05128825 | -1.31129555 | 0.194875806 | 0.355071543 |
| 216063_at   | -0.03328481 | -0.62320766 | 0.53556757  | 0.701943924 |
| 216064_s_at | -0.03100544 | -0.45842315 | 0.648345063 | 0.786638729 |
| 216065_at   | -0.05171528 | -0.96949903 | 0.336283181 | 0.51910638  |
| 216066_at   | 0.06509369  | 2.214505462 | 0.030698598 | 0.086675199 |
| 216067_at   | 0.044288216 | 2.016172449 | 0.048376228 | 0.124226061 |
| 216068_at   | -0.00805476 | -0.45271472 | 0.652426816 | 0.789276975 |
| 216069_at   | 0.051492741 | 1.187986481 | 0.239634204 | 0.409487338 |
| 216070_at   | -0.03988149 | -1.93304704 | 0.058069717 | 0.143296317 |
| 216071_x_at | 0.164168738 | 3.89131399  | 0.000257645 | 0.00163468  |
| 216072_at   | -0.022596   | -0.59747614 | 0.552492725 | 0.714922835 |
| 216073_at   | -0.02845647 | -0.96655071 | 0.337743143 | 0.520550973 |
| 216074_x_at | -0.02838701 | -0.62427568 | 0.534870902 | 0.701420566 |
| 216075_at   | 0.070316836 | 1.820968791 | 0.073720994 | 0.172336994 |
| 216076_at   | -0.0508748  | -0.77661677 | 0.440510281 | 0.62092957  |
| 216077_s_at | 0.00315293  | 0.110691884 | 0.912239142 | 0.953612418 |

|             |             |             |             |             |
|-------------|-------------|-------------|-------------|-------------|
| 216078_at   | -0.00606811 | -0.14288581 | 0.886870823 | 0.93925616  |
| 216079_at   | -0.03426846 | -0.8805056  | 0.382184485 | 0.564946384 |
| 216080_s_at | 0.072526177 | 1.025449843 | 0.309367882 | 0.489928401 |
| 216081_at   | -0.00606247 | -0.10655912 | 0.915502923 | 0.955101774 |
| 216082_at   | -0.10821902 | -1.95526859 | 0.055328526 | 0.138142038 |
| 216083_s_at | 0.00839262  | 0.19923891  | 0.842765973 | 0.913604147 |
| 216084_at   | -0.00948822 | -0.53233883 | 0.596505254 | 0.749080132 |
| 216085_at   | -0.04888023 | -1.3244745  | 0.190490885 | 0.349340116 |
| 216086_at   | -1.04867279 | -5.81323812 | 2.69E-07    | 5.46E-06    |
| 216087_at   | -0.02129622 | -1.12035446 | 0.267136064 | 0.442441631 |
| 216088_s_at | 0.012688627 | 0.304523249 | 0.761808761 | 0.862904429 |
| 216089_at   | 0.006453109 | 0.420762549 | 0.675468494 | 0.805046142 |
| 216090_x_at | 0.026988818 | 1.153534853 | 0.253376879 | 0.426320288 |
| 216091_s_at | 0.050199778 | 1.220742046 | 0.227075789 | 0.394590425 |
| 216092_s_at | -0.15114053 | -3.81492593 | 0.000330364 | 0.002018284 |
| 216093_at   | 0.229281347 | 4.473018839 | 3.60E-05    | 0.000313664 |
| 216094_at   | 0.071829477 | 1.737909449 | 0.087482567 | 0.196787342 |
| 216095_x_at | -0.03475071 | -0.7647255  | 0.447505493 | 0.627133532 |
| 216096_s_at | -0.34359027 | -6.00621355 | 1.29E-07    | 3.09E-06    |
| 216097_at   | 0.002685454 | 0.188548121 | 0.851098826 | 0.918250567 |
| 216098_s_at | -0.00626561 | -0.14652203 | 0.884012494 | 0.937993605 |
| 216099_at   | -0.03440723 | -0.84719227 | 0.400336765 | 0.582763137 |
| 216100_s_at | 0.096341446 | 2.059693352 | 0.043881548 | 0.115179078 |
| 216101_at   | 0.241239553 | 3.738416057 | 0.000422726 | 0.002482909 |
| 216102_at   | -0.00845262 | -0.15397706 | 0.878157183 | 0.934770003 |
| 216103_at   | 0.258776077 | 4.621179105 | 2.14E-05    | 0.000202658 |
| 216104_at   | -0.02028915 | -0.73455524 | 0.465541413 | 0.643192063 |
| 216105_x_at | -0.09439022 | -2.64998843 | 0.01033355  | 0.035802527 |
| 216106_at   | -0.01808681 | -0.48321167 | 0.630747036 | 0.774443992 |
| 216107_at   | -0.07289386 | -1.11847956 | 0.267928985 | 0.443278502 |
| 216108_at   | -0.02057392 | -0.68195635 | 0.49795476  | 0.671006275 |
| 216109_at   | 0.179864154 | 3.61204175  | 0.00063163  | 0.00348676  |
| 216110_x_at | 0.137435404 | 4.376680198 | 5.03E-05    | 0.000413957 |
| 216111_x_at | -0.05309152 | -0.99633118 | 0.32318805  | 0.505191156 |
| 216112_at   | 0.02452495  | 0.919158975 | 0.361782688 | 0.545009334 |
| 216113_at   | -0.00562814 | -0.13040759 | 0.89669086  | 0.944627488 |
| 216114_at   | 0.014446656 | 0.368881633 | 0.713546174 | 0.831806709 |
| 216115_at   | 0.082652333 | 2.456207646 | 0.017026574 | 0.054025675 |
| 216116_at   | -0.03464016 | -0.7384906  | 0.463165579 | 0.641098739 |
| 216117_at   | 0.016638921 | 0.551982695 | 0.583060497 | 0.738818819 |
| 216118_at   | -0.06864954 | -1.5730488  | 0.121094729 | 0.251263551 |
| 216119_s_at | -0.28570253 | -3.85350467 | 0.000291471 | 0.001817329 |
| 216120_s_at | -0.967309   | -7.30792732 | 8.46E-10    | 8.45E-08    |
| 216121_at   | 0.042017181 | 1.595532838 | 0.115975751 | 0.243353598 |
| 216122_at   | 0.011954469 | 0.311116053 | 0.75681709  | 0.860106023 |
| 216123_x_at | 0.094562028 | 2.831813465 | 0.00633508  | 0.023969469 |
| 216124_at   | 0.026134229 | 1.121854687 | 0.266502787 | 0.441769317 |
| 216125_s_at | -0.18131608 | -3.53860614 | 0.000794994 | 0.004208701 |
| 216126_at   | 0.033021801 | 1.022894071 | 0.310564616 | 0.491266549 |
| 216127_at   | -0.00134448 | -0.0451856  | 0.964113093 | 0.981551377 |
| 216128_at   | -0.07153477 | -1.84268466 | 0.070438246 | 0.166465343 |
| 216129_at   | 0.167673826 | 2.319011023 | 0.023903285 | 0.071162112 |
| 216130_at   | 0.020092949 | 0.38683042  | 0.700283774 | 0.822892815 |
| 216131_at   | 0.013542769 | 0.597037946 | 0.552783265 | 0.715236666 |
| 216132_at   | 0.036576616 | 1.243668031 | 0.218576902 | 0.385244268 |
| 216133_at   | -0.00186504 | -0.0525251  | 0.958289048 | 0.978698677 |
| 216134_at   | 0.040881835 | 1.461099565 | 0.149332757 | 0.293264861 |
| 216135_at   | 0.057550519 | 2.557440954 | 0.013154943 | 0.043617642 |
| 216136_at   | -0.03233161 | -1.70644748 | 0.093222666 | 0.206416338 |
| 216137_s_at | 0.021193013 | 0.591473394 | 0.556479484 | 0.71870388  |
| 216138_at   | 0.042076569 | 0.806624894 | 0.423146154 | 0.604960674 |
| 216139_s_at | -0.31026215 | -4.31395565 | 6.25E-05    | 0.000495351 |
| 216140_at   | 0.017561616 | 0.575016352 | 0.567482785 | 0.727111333 |
| 216141_at   | -0.05752063 | -1.77206301 | 0.081585724 | 0.186488809 |
| 216142_at   | -0.02194464 | -0.42223821 | 0.674397232 | 0.804316737 |
| 216143_at   | 0.002028376 | 0.044351026 | 0.964775472 | 0.981979672 |
| 216144_at   | 0.113170576 | 2.893526156 | 0.005342167 | 0.020810723 |
| 216145_at   | -0.01234573 | -0.2541957  | 0.800234737 | 0.887006222 |
| 216146_at   | 0.085921416 | 2.108039736 | 0.039316891 | 0.105395304 |
| 216147_at   | -0.00875892 | -0.42384008 | 0.673235122 | 0.803488239 |
| 216148_at   | -0.01613017 | -0.45525114 | 0.65061185  | 0.788297587 |
| 216149_at   | -0.16212819 | -2.83389405 | 0.006299    | 0.023853152 |
| 216150_at   | 0.033056945 | 0.798546199 | 0.427779999 | 0.609039015 |
| 216151_at   | -0.00080349 | -0.041403   | 0.967115451 | 0.983329554 |
| 216152_at   | 0.064141519 | 1.415091408 | 0.162337083 | 0.311581229 |

|             |              |             |             |             |
|-------------|--------------|-------------|-------------|-------------|
| 216153_x_at | 0.004559038  | 0.109881947 | 0.912878658 | 0.953812433 |
| 216154_at   | -0.00847994  | -0.26542114 | 0.791617097 | 0.881328359 |
| 216155_at   | 0.066433099  | 2.437216957 | 0.017857996 | 0.056193028 |
| 216156_at   | 0.035636847  | 1.467439469 | 0.147606522 | 0.290922222 |
| 216157_at   | -0.0378116   | -0.7194148  | 0.474746396 | 0.650699725 |
| 216158_at   | -0.036631198 | -0.86349391 | 0.391388536 | 0.57416499  |
| 216159_s_at | -0.06118156  | -0.93296244 | 0.35466982  | 0.537774508 |
| 216160_at   | 0.033685771  | 0.737140178 | 0.463980068 | 0.641749109 |
| 216161_at   | 0.018257675  | 0.573685249 | 0.568377422 | 0.727682014 |
| 216162_at   | -0.06721311  | -1.43821823 | 0.155694589 | 0.302189178 |
| 216163_at   | 0.005994489  | 0.127566615 | 0.898928958 | 0.945982552 |
| 216164_at   | 0.001130845  | 0.029097844 | 0.976885485 | 0.988407917 |
| 216165_at   | 0.039130125  | 1.992727968 | 0.050957969 | 0.129379613 |
| 216166_at   | 0.022246904  | 0.522480888 | 0.603306422 | 0.754103499 |
| 216167_at   | -0.00400761  | -0.16706495 | 0.867894446 | 0.928444781 |
| 216168_at   | 0.022064639  | 0.401173291 | 0.689752531 | 0.815235662 |
| 216169_at   | -0.04598102  | -1.02884473 | 0.307783075 | 0.488179763 |
| 216170_at   | 0.044693762  | 1.439583208 | 0.155309249 | 0.301707423 |
| 216171_at   | 0.005213702  | 0.300174579 | 0.765106899 | 0.865017899 |
| 216172_at   | 0.027619757  | 0.655237941 | 0.514880116 | 0.685261096 |
| 216173_at   | 0.02957275   | 1.343232633 | 0.184378739 | 0.341649927 |
| 216174_at   | -0.06657394  | -1.53075286 | 0.131214479 | 0.267076026 |
| 216175_at   | 0.048799557  | 1.57203979  | 0.121328637 | 0.251643746 |
| 216176_at   | -0.04231398  | -0.93212857 | 0.355096924 | 0.538225042 |
| 216177_at   | 0.018353329  | 0.770397218 | 0.444160971 | 0.62434554  |
| 216178_x_at | 0.022198054  | 1.134167991 | 0.261345124 | 0.435659689 |
| 216179_x_at | 0.039364244  | 1.503583249 | 0.138062405 | 0.277139092 |
| 216180_s_at | -0.07672096  | -1.13962129 | 0.259083667 | 0.433133851 |
| 216181_at   | 0.060421584  | 2.112236929 | 0.038940847 | 0.104613148 |
| 216182_at   | -0.01280874  | -0.30243951 | 0.763388572 | 0.863927529 |
| 216183_at   | -0.02447213  | -0.53636265 | 0.593739477 | 0.746950168 |
| 216184_s_at | -0.31938643  | -5.81378996 | 2.68E-07    | 5.45E-06    |
| 216185_at   | 0.036649301  | 0.980576698 | 0.330834967 | 0.513338067 |
| 216186_at   | -0.02485436  | -0.90796407 | 0.367618253 | 0.550792684 |
| 216187_x_at | 0.296048576  | 4.807058971 | 1.11E-05    | 0.000116133 |
| 216188_at   | 0.004039728  | 0.11343792  | 0.910071343 | 0.95252713  |
| 216189_at   | 0.003232116  | 0.110118525 | 0.912691853 | 0.953763372 |
| 216190_x_at | -0.0090632   | -0.41024203 | 0.683125322 | 0.810533591 |
| 216191_s_at | 0.019307057  | 0.735643594 | 0.464883665 | 0.642700552 |
| 216192_at   | 0.007530766  | 0.196015166 | 0.84527684  | 0.915054562 |
| 216193_at   | 0.007847929  | 0.296510438 | 0.767889271 | 0.867066885 |
| 216194_s_at | 0.105354279  | 1.426094813 | 0.159149814 | 0.307165464 |
| 216195_at   | 0.14937517   | 3.644022645 | 0.00057098  | 0.003205405 |
| 216196_at   | 0.012063798  | 0.288085382 | 0.774298448 | 0.870830149 |
| 216197_at   | 0.278238447  | 5.921160627 | 1.79E-07    | 3.95E-06    |
| 216198_at   | -0.00899756  | -0.20660731 | 0.837033165 | 0.910083365 |
| 216199_s_at | 0.253476511  | 3.363404812 | 0.001362149 | 0.006603633 |
| 216200_at   | -0.07365144  | -2.14173829 | 0.036385048 | 0.099250301 |
| 216201_at   | -0.0413365   | -0.77687991 | 0.440356216 | 0.620827469 |
| 216202_s_at | 0.105331827  | 1.468778847 | 0.147243844 | 0.290342902 |
| 216203_at   | 0.04588688   | 1.091349851 | 0.279588457 | 0.456618576 |
| 216204_at   | 0.061481655  | 1.619640694 | 0.11068238  | 0.234971353 |
| 216205_s_at | -0.26288983  | -3.2718705  | 0.001793897 | 0.008323594 |
| 216206_x_at | 0.03493348   | 0.444011119 | 0.658670801 | 0.793713129 |
| 216207_x_at | -0.00242753  | -0.05859236 | 0.953476263 | 0.976080838 |
| 216208_s_at | -0.04780727  | -1.33465991 | 0.187153346 | 0.34515674  |
| 216209_at   | -0.03657354  | -1.05248449 | 0.296900466 | 0.475900637 |
| 216210_x_at | 0.274827468  | 5.102182121 | 3.80E-06    | 4.82E-05    |
| 216211_at   | -0.0552043   | -1.71462749 | 0.091701214 | 0.203845345 |
| 216212_s_at | 0.019829704  | 0.470162    | 0.639985413 | 0.781140159 |
| 216213_at   | -0.04196215  | -1.10235435 | 0.274817098 | 0.451084389 |
| 216214_at   | -0.05228038  | -2.05358587 | 0.044489653 | 0.116453765 |
| 216215_s_at | -0.37728387  | -5.69808876 | 4.16E-07    | 7.80E-06    |
| 216216_at   | -0.03015284  | -1.19266283 | 0.237811167 | 0.407259711 |
| 216217_at   | -0.03286972  | -0.78873574 | 0.433447722 | 0.614270853 |
| 216218_s_at | -0.35592974  | -6.19108072 | 6.37E-08    | 1.77E-06    |
| 216219_at   | 0.007134249  | 0.139159625 | 0.889801442 | 0.941008189 |
| 216220_s_at | 0.013533097  | 0.312481373 | 0.755784644 | 0.859588429 |
| 216221_s_at | -0.042529    | -1.04927044 | 0.298364365 | 0.477528298 |
| 216222_s_at | 0.093928823  | 1.679085295 | 0.098463562 | 0.215015003 |
| 216223_at   | -0.10362705  | -2.0387795  | 0.045994229 | 0.119585978 |
| 216224_s_at | -0.04758725  | -1.03810129 | 0.303489949 | 0.483308608 |
| 216225_at   | -0.00162141  | -0.04980616 | 0.960446329 | 0.979849506 |
| 216226_at   | -0.05091309  | -1.20901142 | 0.231516811 | 0.399820291 |
| 216227_at   | -0.01823349  | -0.52288678 | 0.603025685 | 0.753886644 |



|             |             |             |             |             |
|-------------|-------------|-------------|-------------|-------------|
| 216228_s_at | -0.01555506 | -0.89295239 | 0.375537219 | 0.558471588 |
| 216229_x_at | 0.08994937  | 2.282773412 | 0.026090898 | 0.076308589 |
| 216230_x_at | -0.04875692 | -1.22866293 | 0.224112514 | 0.391229462 |
| 216231_s_at | -0.02056086 | -0.17395611 | 0.862499854 | 0.925205661 |
| 216232_s_at | 0.044577831 | 1.342000105 | 0.18477572  | 0.342172722 |
| 216233_at   | 0.145547137 | 2.663544507 | 0.009970166 | 0.034808737 |
| 216234_s_at | -0.02605558 | -0.67661073 | 0.501316588 | 0.673627208 |
| 216235_s_at | -0.00410811 | -0.11628593 | 0.907823771 | 0.951157083 |
| 216236_s_at | -0.15392967 | -1.93140652 | 0.058276598 | 0.143657334 |
| 216237_s_at | 0.329901787 | 4.319116209 | 6.14E-05    | 0.000488043 |
| 216238_s_at | 0.007319511 | 0.318381447 | 0.75132821  | 0.856935291 |
| 216239_at   | 0.051415616 | 1.661417291 | 0.101974153 | 0.220955534 |
| 216240_at   | 0.017482167 | 0.418521795 | 0.677096464 | 0.806266523 |
| 216241_s_at | 0.312756956 | 5.489180143 | 9.10E-07    | 1.48E-05    |
| 216242_x_at | -0.10493855 | -2.03483158 | 0.046402753 | 0.120361745 |
| 216243_s_at | 0.034973636 | 1.00785514  | 0.317669978 | 0.499004338 |
| 216244_at   | -0.03384315 | -1.18844738 | 0.23945408  | 0.409351709 |
| 216245_at   | 0.014053491 | 0.520299761 | 0.604816041 | 0.754955829 |
| 216246_at   | 0.001135442 | 0.029698042 | 0.976408846 | 0.988219005 |
| 216247_at   | -0.13689312 | -2.27060058 | 0.026864617 | 0.077953088 |
| 216248_s_at | 0.133940163 | 1.394674621 | 0.168381641 | 0.320307837 |
| 216249_at   | -0.03707746 | -0.94213843 | 0.349991931 | 0.533133812 |
| 216250_s_at | 0.072195459 | 1.500769658 | 0.138787412 | 0.27828467  |
| 216251_s_at | -0.04423792 | -1.10259514 | 0.274713336 | 0.450980327 |
| 216252_x_at | 0.068171946 | 0.967116479 | 0.337462659 | 0.520244263 |
| 216253_s_at | -0.03751225 | -0.76096577 | 0.449730615 | 0.629172097 |
| 216254_at   | -0.03360101 | -1.55980642 | 0.124193507 | 0.25623009  |
| 216255_s_at | -0.0541632  | -1.7663237  | 0.08255289  | 0.188008453 |
| 216256_at   | -0.07259376 | -1.71429215 | 0.091763182 | 0.203953539 |
| 216257_at   | -0.1118441  | -2.11256075 | 0.038911965 | 0.104566987 |
| 216258_s_at | 0.013555213 | 0.848768418 | 0.399466125 | 0.581775347 |
| 216259_at   | 0.010866839 | 0.313517973 | 0.755001072 | 0.859178359 |
| 216260_at   | -0.0253406  | -0.73606661 | 0.464628156 | 0.642367182 |
| 216261_at   | 0.081002165 | 2.295215244 | 0.025320561 | 0.074445827 |
| 216262_s_at | 0.042051477 | 1.099329478 | 0.27612291  | 0.452555978 |
| 216263_s_at | 0.061593093 | 2.337231124 | 0.022866259 | 0.06864178  |
| 216264_s_at | 0.395015877 | 6.016611052 | 1.24E-07    | 2.99E-06    |
| 216265_x_at | -0.10406292 | -3.58131202 | 0.000695663 | 0.003776334 |
| 216266_s_at | -0.11346275 | -2.41736766 | 0.018765834 | 0.058505941 |
| 216267_s_at | -0.00134196 | -0.03702648 | 0.970589812 | 0.985139806 |
| 216268_s_at | 0.289325897 | 3.141313981 | 0.002637025 | 0.011514796 |
| 216269_s_at | 0.192025305 | 4.124583069 | 0.000118848 | 0.000853536 |
| 216270_at   | 0.052112626 | 1.446674631 | 0.153319251 | 0.298920035 |
| 216271_x_at | 0.019638228 | 0.465793162 | 0.643091218 | 0.783179952 |
| 216272_x_at | 0.062065365 | 1.330671121 | 0.188455073 | 0.346687829 |
| 216273_at   | 0.088034416 | 2.568349805 | 0.012789398 | 0.042636416 |
| 216274_s_at | 0.176155709 | 1.614974719 | 0.111691333 | 0.236629963 |
| 216275_at   | -0.01342916 | -0.34889785 | 0.728417249 | 0.841506885 |
| 216276_s_at | -0.01366729 | -0.60442569 | 0.547895161 | 0.711122274 |
| 216277_at   | -0.02116845 | -0.41797161 | 0.677496429 | 0.806570868 |
| 216278_at   | 0.111016038 | 2.378048821 | 0.020687269 | 0.06326505  |
| 216279_at   | -0.01086757 | -0.37020342 | 0.712566409 | 0.831159585 |
| 216280_s_at | -0.05086301 | -2.06129193 | 0.043723576 | 0.114838626 |
| 216281_at   | -0.01538241 | -0.4527697  | 0.652387453 | 0.789265909 |
| 216282_x_at | -0.03504078 | -1.24066293 | 0.219677385 | 0.386574071 |
| 216283_s_at | -0.02601638 | -0.79990569 | 0.426998095 | 0.608274595 |
| 216284_at   | 0.115035645 | 3.385159974 | 0.001275081 | 0.006245033 |
| 216285_at   | 0.053909927 | 1.394420568 | 0.168457933 | 0.320371146 |
| 216286_at   | -0.06642822 | -3.47041485 | 0.000982085 | 0.005021891 |
| 216287_at   | -0.00653147 | -0.13262153 | 0.894947317 | 0.943802522 |
| 216288_at   | 0.01752978  | 0.83044061  | 0.409662274 | 0.591822677 |
| 216289_at   | -0.09425661 | -1.34244694 | 0.184631726 | 0.341991094 |
| 216290_x_at | 0.013917655 | 0.311783009 | 0.756312687 | 0.859779462 |
| 216291_at   | -0.054144   | -1.24576657 | 0.217810818 | 0.384184218 |
| 216292_at   | 0.006065652 | 0.127416272 | 0.899047421 | 0.946001023 |
| 216293_at   | -0.0004199  | -0.00999884 | 0.992056199 | 0.996336531 |
| 216294_s_at | -0.03695901 | -0.89737844 | 0.373191231 | 0.556252084 |
| 216295_s_at | 0.039081792 | 0.733839773 | 0.465974097 | 0.643531236 |
| 216296_at   | -0.03729833 | -0.81821472 | 0.416551261 | 0.598832635 |
| 216297_at   | 0.021694227 | 1.159159288 | 0.251095632 | 0.423902314 |
| 216298_at   | 0.042355321 | 2.703227118 | 0.008972522 | 0.031944551 |
| 216299_s_at | 0.056002531 | 1.658836229 | 0.102495458 | 0.221770627 |
| 216300_x_at | 0.133717053 | 2.640694117 | 0.010589635 | 0.036506633 |
| 216301_at   | 0.036019355 | 0.911355249 | 0.365844217 | 0.549166271 |
| 216302_at   | 0.02840378  | 0.948138702 | 0.346954828 | 0.529960189 |

|             |             |             |             |             |
|-------------|-------------|-------------|-------------|-------------|
| 216303_s_at | -0.01838831 | -0.8019523  | 0.425822616 | 0.607266371 |
| 216304_x_at | -0.02093936 | -0.29996895 | 0.765262965 | 0.865128688 |
| 216305_s_at | 0.040087491 | 1.179162973 | 0.24310146  | 0.413877202 |
| 216306_x_at | 0.583455464 | 6.231090437 | 5.47E-08    | 1.58E-06    |
| 216307_at   | -1.527673   | -9.86772202 | 4.57E-14    | 5.11E-10    |
| 216308_x_at | 0.024196213 | 0.456683114 | 0.649588117 | 0.787676482 |
| 216309_x_at | -0.03359536 | -1.07279707 | 0.287762789 | 0.465950312 |
| 216310_at   | 0.270468877 | 6.072328467 | 1.00E-07    | 2.52E-06    |
| 216311_at   | -0.01119435 | -0.27317681 | 0.78567831  | 0.877750601 |
| 216312_at   | -0.01562281 | -0.4290254  | 0.669478803 | 0.800908686 |
| 216313_at   | 0.01523437  | 0.706086883 | 0.482933561 | 0.657986303 |
| 216314_at   | -0.02078846 | -1.18536465 | 0.240660716 | 0.410723211 |
| 216315_x_at | -0.06078588 | -2.00248995 | 0.049868921 | 0.127205663 |
| 216316_x_at | 0.030801261 | 1.064935181 | 0.291276143 | 0.469648365 |
| 216317_x_at | 0.037573406 | 0.980588548 | 0.33082917  | 0.513338067 |
| 216318_at   | -0.00034204 | -0.01008612 | 0.991986855 | 0.996311666 |
| 216319_at   | 0.026170044 | 1.248974635 | 0.216643528 | 0.382757453 |
| 216320_x_at | 0.142107502 | 4.250744148 | 7.75E-05    | 0.00059552  |
| 216321_s_at | 0.291945432 | 4.271923893 | 7.21E-05    | 0.00056007  |
| 216322_at   | -0.00363043 | -0.2207686  | 0.826040458 | 0.903531661 |
| 216323_x_at | -0.11418006 | -2.07811921 | 0.042090363 | 0.111367149 |
| 216324_at   | -0.02698006 | -0.70157291 | 0.485724172 | 0.660519844 |
| 216325_x_at | -0.00348081 | -0.06815205 | 0.945896741 | 0.972096197 |
| 216326_s_at | -0.0100488  | -0.38456991 | 0.70194902  | 0.824014243 |
| 216327_s_at | -0.09006431 | -1.65110808 | 0.104069351 | 0.224430039 |
| 216328_at   | -0.03808678 | -0.97919488 | 0.331511357 | 0.514084162 |
| 216329_at   | -0.08252998 | -1.52967401 | 0.131481148 | 0.267438352 |
| 216330_s_at | -0.06345553 | -1.77114977 | 0.081738986 | 0.186674285 |
| 216331_at   | 0.412661608 | 7.210869397 | 1.23E-09    | 1.08E-07    |
| 216332_at   | 0.027635056 | 0.684022784 | 0.496658501 | 0.669703769 |
| 216333_x_at | 0.159230062 | 3.869798173 | 0.000276402 | 0.001735938 |
| 216334_s_at | -0.02490913 | -0.90901855 | 0.367066034 | 0.550245534 |
| 216336_x_at | 0.539417115 | 4.905130073 | 7.78E-06    | 8.67E-05    |
| 216337_at   | 0.005710577 | 0.171599302 | 0.864344103 | 0.92644968  |
| 216338_s_at | -0.08655116 | -1.94903852 | 0.056085663 | 0.139549074 |
| 216339_s_at | -0.00361602 | -0.10012483 | 0.920587184 | 0.958253247 |
| 216340_s_at | 0.019155726 | 0.490389211 | 0.625690772 | 0.77068052  |
| 216341_s_at | -0.04282395 | -0.78839011 | 0.433648211 | 0.614496524 |
| 216342_x_at | 0.069801782 | 1.720717073 | 0.090581913 | 0.201889431 |
| 216343_at   | -0.02441714 | -0.48989022 | 0.626041712 | 0.770927158 |
| 216344_at   | 0.024497799 | 0.61043216  | 0.543937198 | 0.708449078 |
| 216345_at   | -0.0546095  | -0.98317879 | 0.329563749 | 0.51200553  |
| 216346_at   | -0.03400696 | -1.09372534 | 0.278553627 | 0.455427793 |
| 216347_s_at | -0.16376633 | -2.80015599 | 0.006908111 | 0.025763628 |
| 216348_at   | 0.128718489 | 2.891232828 | 0.005376327 | 0.020919275 |
| 216349_at   | 0.015589747 | 0.569674496 | 0.571077233 | 0.72950848  |
| 216350_s_at | -0.01831845 | -0.53109973 | 0.597358164 | 0.74970882  |
| 216351_x_at | 0.001743537 | 0.031660782 | 0.974850223 | 0.987265038 |
| 216352_x_at | -0.38999678 | -3.3153105  | 0.001574997 | 0.007462868 |
| 216353_s_at | -0.02040434 | -0.80902485 | 0.421775394 | 0.603759839 |
| 216354_at   | 0.025978153 | 0.753216663 | 0.454337018 | 0.63353753  |
| 216355_at   | -0.0319979  | -0.77021455 | 0.444268456 | 0.624457348 |
| 216356_x_at | 0.395231642 | 4.917672019 | 7.44E-06    | 8.38E-05    |
| 216357_at   | -0.05675518 | -1.50474456 | 0.137764032 | 0.27671686  |
| 216358_at   | 0.020623206 | 0.498002876 | 0.620346949 | 0.767058041 |
| 216359_at   | -0.02644411 | -0.99608712 | 0.323305607 | 0.505286551 |
| 216360_x_at | -0.11176819 | -2.29149185 | 0.025548951 | 0.074992362 |
| 216361_s_at | -0.00813967 | -0.24249293 | 0.809245439 | 0.892896202 |
| 216362_at   | -0.02071306 | -0.52981334 | 0.598244223 | 0.750398476 |
| 216363_at   | 0.001576719 | 0.035317172 | 0.97194693  | 0.985799115 |
| 216364_s_at | -0.05366337 | -0.88853217 | 0.377889425 | 0.560423139 |
| 216365_x_at | 0.034969019 | 1.00041752  | 0.321224078 | 0.503090563 |
| 216366_x_at | 0.005943376 | 0.160523889 | 0.873020813 | 0.931594402 |
| 216367_at   | -0.0050166  | -0.15227663 | 0.879492145 | 0.93532893  |
| 216368_s_at | 0.029752481 | 1.193430204 | 0.237512976 | 0.406936167 |
| 216369_at   | 0.0171584   | 0.573514166 | 0.568492457 | 0.727745901 |
| 216370_s_at | -0.00253339 | -0.07290613 | 0.942129237 | 0.969988442 |
| 216371_at   | -0.02153703 | -0.58361502 | 0.561720327 | 0.722949024 |
| 216372_at   | -0.01222778 | -0.31561265 | 0.753418482 | 0.858086469 |
| 216373_at   | 0.037057883 | 1.90941761  | 0.06111073  | 0.149178542 |
| 216374_at   | -0.02143062 | -0.42825256 | 0.670038125 | 0.801341858 |
| 216375_s_at | -0.19890346 | -5.14347102 | 3.27E-06    | 4.24E-05    |
| 216376_x_at | 0.076646252 | 1.847523135 | 0.069723822 | 0.165248822 |
| 216377_x_at | 0.024749562 | 0.737578495 | 0.463715614 | 0.64152231  |
| 216378_at   | 0.00695628  | 0.282790366 | 0.778334637 | 0.872933228 |

|             |             |             |             |             |
|-------------|-------------|-------------|-------------|-------------|
| 216379_x_at | 0.635633127 | 3.174002059 | 0.002396547 | 0.010604066 |
| 216380_x_at | 0.053528809 | 1.503564377 | 0.138067258 | 0.277139092 |
| 216381_x_at | 0.17196628  | 4.083796187 | 0.000136273 | 0.000956692 |
| 216382_s_at | 0.114259886 | 2.976029106 | 0.004239068 | 0.01721356  |
| 216383_at   | 0.021505012 | 0.611973668 | 0.542923778 | 0.707576742 |
| 216384_x_at | 0.278207522 | 5.699163688 | 4.14E-07    | 7.77E-06    |
| 216385_at   | 0.059571313 | 1.561724684 | 0.123740733 | 0.255484654 |
| 216386_at   | 0.05859029  | 1.647942568 | 0.104719691 | 0.225472487 |
| 216387_x_at | 0.007000797 | 0.229643519 | 0.819168934 | 0.899238139 |
| 216388_s_at | -0.00122831 | -0.02532231 | 0.97988396  | 0.989895432 |
| 216389_s_at | -0.11053405 | -2.83705349 | 0.006244574 | 0.023687193 |
| 216390_at   | 0.029637318 | 0.73650751  | 0.464361934 | 0.642118302 |
| 216391_s_at | 0.003717418 | 0.094986782 | 0.924649578 | 0.960540989 |
| 216392_s_at | -0.0479763  | -1.47941848 | 0.144387612 | 0.286327867 |
| 216393_at   | -0.02202926 | -0.88905932 | 0.377608421 | 0.560238872 |
| 216394_x_at | 0.002972022 | 0.097470427 | 0.922685626 | 0.959563309 |
| 216395_at   | 0.032292241 | 0.85332299  | 0.396956815 | 0.579347985 |
| 216396_s_at | -0.11958625 | -2.54840408 | 0.013464908 | 0.04446713  |
| 216397_s_at | -0.02598761 | -0.56713033 | 0.572793063 | 0.730888816 |
| 216398_at   | 0.002938003 | 0.062180646 | 0.9506307   | 0.974686323 |
| 216399_s_at | 0.080099085 | 1.370315068 | 0.175818489 | 0.330424389 |
| 216400_at   | -0.03330404 | -0.91632241 | 0.363255643 | 0.546349361 |
| 216401_x_at | 0.010333341 | 0.31712033  | 0.752280046 | 0.857347949 |
| 216402_at   | -0.03011287 | -0.94481444 | 0.348635307 | 0.531673007 |
| 216403_at   | -0.07065535 | -1.52550833 | 0.132514868 | 0.268916791 |
| 216404_at   | -0.07789631 | -1.61599305 | 0.111470501 | 0.236285317 |
| 216405_at   | 0.025006276 | 0.66690152  | 0.507454054 | 0.678697935 |
| 216406_at   | 0.014992432 | 0.652598437 | 0.516568659 | 0.686362425 |
| 216407_at   | 0.008474231 | 0.247034305 | 0.805745594 | 0.890596579 |
| 216408_at   | -0.00367594 | -0.11020099 | 0.912626736 | 0.953749891 |
| 216409_at   | 0.032151321 | 0.613486385 | 0.541930225 | 0.706924655 |
| 216410_at   | -0.02129192 | -0.80164263 | 0.426000349 | 0.607394744 |
| 216411_s_at | -0.02952295 | -0.97309541 | 0.334507953 | 0.517313943 |
| 216412_x_at | 0.004846607 | 0.121192035 | 0.903953783 | 0.949035741 |
| 216413_at   | -0.03689875 | -1.31378139 | 0.194042952 | 0.354081644 |
| 216414_at   | 0.021577252 | 0.761999211 | 0.449118354 | 0.628546298 |
| 216415_at   | -0.0290057  | -0.60593461 | 0.54689949  | 0.710647707 |
| 216416_at   | 0.003774736 | 0.078599272 | 0.937619303 | 0.967448905 |
| 216417_x_at | -0.01383399 | -0.45059399 | 0.653945954 | 0.790206196 |
| 216418_at   | -0.02129613 | -0.57118591 | 0.570059099 | 0.728624414 |
| 216419_at   | -0.04121159 | -0.6365691  | 0.526885828 | 0.694976954 |
| 216420_at   | -0.01837289 | -0.63111639 | 0.530419868 | 0.697672996 |
| 216421_at   | -0.01312165 | -0.34253437 | 0.733175103 | 0.84440781  |
| 216422_at   | 0.023215017 | 0.716390771 | 0.476597135 | 0.652356104 |
| 216423_at   | 0.019984027 | 0.590363044 | 0.557218504 | 0.719307794 |
| 216424_at   | -0.00910136 | -0.39482964 | 0.694402905 | 0.818842739 |
| 216425_at   | 0.008909018 | 0.190792677 | 0.849347876 | 0.917306379 |
| 216426_at   | -0.02168855 | -0.76610439 | 0.446691033 | 0.626559095 |
| 216427_at   | 0.019714455 | 0.67810047  | 0.500378462 | 0.672916417 |
| 216428_x_at | -0.02345412 | -0.88265389 | 0.381031925 | 0.563876782 |
| 216429_at   | -0.04812811 | -1.25284089 | 0.215242891 | 0.381096398 |
| 216430_x_at | -0.01148682 | -0.30975053 | 0.757850132 | 0.860754736 |
| 216431_at   | 0.047035062 | 0.853589238 | 0.39681043  | 0.579234091 |
| 216432_at   | 0.018909023 | 0.317177863 | 0.752236615 | 0.857347949 |
| 216433_s_at | 0.006723255 | 0.247234816 | 0.80559116  | 0.890595639 |
| 216434_at   | -0.03731447 | -0.73177702 | 0.467222836 | 0.644451998 |
| 216435_at   | -0.04863645 | -1.16348654 | 0.249350551 | 0.421800712 |
| 216436_at   | -0.01848373 | -0.84089237 | 0.403828415 | 0.586175019 |
| 216437_at   | 0.003460234 | 0.069631755 | 0.944723973 | 0.971451783 |
| 216438_s_at | 0.029232333 | 0.507373945 | 0.613797794 | 0.761995862 |
| 216439_at   | 0.020689408 | 0.504469631 | 0.615824187 | 0.763681557 |
| 216440_at   | -0.01355948 | -0.4080258  | 0.684742602 | 0.811485136 |
| 216441_at   | -0.02743446 | -1.13930842 | 0.259213033 | 0.433252885 |
| 216442_x_at | 0.179532372 | 1.651464831 | 0.103996265 | 0.224336378 |
| 216443_at   | -0.03116514 | -0.85944196 | 0.393601004 | 0.576351236 |
| 216444_at   | -0.02002269 | -0.5663067  | 0.573349065 | 0.73136535  |
| 216445_at   | -0.07480658 | -1.71572723 | 0.091498237 | 0.203505484 |
| 216446_at   | -0.01451446 | -0.37181375 | 0.711373421 | 0.83042186  |
| 216447_at   | 0.049358279 | 1.844558041 | 0.070160905 | 0.165976667 |
| 216448_at   | -0.08650055 | -2.0574199  | 0.044107063 | 0.115614831 |
| 216449_x_at | 0.03366326  | 0.467997009 | 0.6415237   | 0.782227299 |
| 216450_x_at | -0.06969156 | -1.5955334  | 0.115975625 | 0.243353598 |
| 216451_at   | -0.07102836 | -1.23026842 | 0.223515357 | 0.390636178 |
| 216452_at   | 0.478063847 | 4.044041024 | 0.000155617 | 0.001066205 |
| 216453_at   | -0.00108746 | -0.0181772  | 0.98555928  | 0.99310365  |

|             |             |             |             |             |
|-------------|-------------|-------------|-------------|-------------|
| 216454_at   | -0.00129643 | -0.04590537 | 0.963541847 | 0.981285683 |
| 216455_at   | 0.061956583 | 1.326284442 | 0.189894545 | 0.348647071 |
| 216456_at   | 0.570567228 | 6.042755654 | 1.12E-07    | 2.76E-06    |
| 216457_s_at | 0.013632662 | 0.2141602   | 0.83116602  | 0.90656429  |
| 216458_at   | 0.02599114  | 0.690471731 | 0.492625007 | 0.666440737 |
| 216459_x_at | 0.079423068 | 3.365752571 | 0.001352489 | 0.006564556 |
| 216460_at   | 0.040983403 | 0.824113176 | 0.413218913 | 0.595460537 |
| 216461_at   | -0.00230452 | -0.06971965 | 0.944654312 | 0.971451783 |
| 216462_at   | 0.015934709 | 0.904117769 | 0.369637023 | 0.552872082 |
| 216463_at   | -0.00260249 | -0.12268386 | 0.902777473 | 0.948313139 |
| 216464_x_at | -0.01563637 | -0.40201132 | 0.689139083 | 0.814831576 |
| 216465_at   | 0.313207889 | 3.974993679 | 0.000195682 | 0.00129332  |
| 216466_at   | 0.033096744 | 1.535312904 | 0.130092076 | 0.265410165 |
| 216467_s_at | -0.03528949 | -0.89425147 | 0.374847688 | 0.558045847 |
| 216468_s_at | -0.04568483 | -1.32328444 | 0.190883758 | 0.349859618 |
| 216469_at   | 0.013812749 | 0.749494255 | 0.456559442 | 0.635469001 |
| 216470_x_at | -0.10656408 | -2.65552007 | 0.010183833 | 0.03539614  |
| 216471_x_at | -0.04127852 | -1.07540241 | 0.286605    | 0.464614265 |
| 216472_at   | 0.103725005 | 2.12581297  | 0.037745893 | 0.10217207  |
| 216473_x_at | 0.034745672 | 0.549527285 | 0.584733093 | 0.740245827 |
| 216474_x_at | 0.033453212 | 0.608045029 | 0.545508451 | 0.709616299 |
| 216475_at   | 0.008281824 | 0.205218159 | 0.838113292 | 0.910559246 |
| 216476_at   | -0.03865152 | -1.08173219 | 0.283805561 | 0.461264023 |
| 216477_at   | -0.02066217 | -0.6513838  | 0.517346671 | 0.686986344 |
| 216478_at   | -0.03159752 | -0.85447789 | 0.396322086 | 0.578939411 |
| 216479_at   | 0.001074491 | 0.031739838 | 0.974787446 | 0.987265038 |
| 216480_x_at | -0.01292324 | -0.43437488 | 0.665612436 | 0.798527662 |
| 216481_at   | -0.03532461 | -0.71850791 | 0.475301    | 0.651240183 |
| 216482_x_at | 0.004784071 | 0.104977989 | 0.916751983 | 0.955822194 |
| 216483_s_at | -0.00258692 | -0.06252152 | 0.950360416 | 0.974587726 |
| 216484_x_at | 0.09766922  | 3.637366974 | 0.000583125 | 0.003262929 |
| 216485_s_at | -0.01436931 | -0.27197036 | 0.786601306 | 0.878298745 |
| 216486_x_at | -0.02801514 | -0.653437   | 0.516031897 | 0.686084458 |
| 216487_at   | -0.0008812  | -0.02772085 | 0.977979036 | 0.988805552 |
| 216488_s_at | 0.025695646 | 0.548307165 | 0.585565074 | 0.740834204 |
| 216489_at   | -0.02421758 | -0.62594367 | 0.533783813 | 0.700489903 |
| 216490_x_at | 0.03892894  | 1.909169202 | 0.061143404 | 0.149242001 |
| 216491_x_at | 0.044923705 | 1.742330559 | 0.086699895 | 0.195361848 |
| 216492_at   | 0.06286629  | 1.785367487 | 0.079379935 | 0.182510961 |
| 216493_s_at | 0.013592726 | 0.577357835 | 0.565910749 | 0.726292485 |
| 216494_at   | 0.063424595 | 2.260343993 | 0.02753224  | 0.079441594 |
| 216495_x_at | 0.039342274 | 1.725216123 | 0.089762222 | 0.200572633 |
| 216496_s_at | -0.00418009 | -0.06366575 | 0.94945318  | 0.974059672 |
| 216497_at   | 0.009082923 | 0.33687722  | 0.737413694 | 0.847486718 |
| 216498_at   | 0.018469006 | 0.557669023 | 0.579195852 | 0.735902211 |
| 216499_at   | 0.061536753 | 1.838907896 | 0.071000177 | 0.167456853 |
| 216500_at   | 0.092265502 | 1.800260131 | 0.076970067 | 0.178161706 |
| 216501_at   | -0.06751173 | -1.86766511 | 0.066814999 | 0.15997514  |
| 216502_at   | -0.07908852 | -0.96767301 | 0.337186907 | 0.519957149 |
| 216503_s_at | 0.014033251 | 0.408019331 | 0.684747325 | 0.811485136 |
| 216504_s_at | 0.005100748 | 0.132991476 | 0.894656022 | 0.943774889 |
| 216505_x_at | 0.017454304 | 0.516854455 | 0.607204166 | 0.756900917 |
| 216506_x_at | -0.01937072 | -0.57923911 | 0.564649244 | 0.725089906 |
| 216507_at   | -0.03860848 | -0.69054127 | 0.492581613 | 0.666440737 |
| 216508_x_at | 0.116659169 | 3.76951152  | 0.000382539 | 0.00228318  |
| 216509_x_at | 0.070556573 | 1.809979175 | 0.075430588 | 0.17542481  |
| 216510_x_at | 0.011073996 | 0.494169768 | 0.623034756 | 0.768503162 |
| 216511_s_at | 0.242910135 | 2.535959504 | 0.013902592 | 0.045629335 |
| 216512_s_at | -0.01789741 | -0.48588682 | 0.628860422 | 0.77304749  |
| 216513_at   | 0.033724909 | 1.378980384 | 0.173144723 | 0.326671055 |
| 216514_at   | -0.02409233 | -0.52785442 | 0.599594689 | 0.751271015 |
| 216515_x_at | 0.291707282 | 6.686420268 | 9.45E-09    | 4.30E-07    |
| 216516_at   | -0.00580436 | -0.3176309  | 0.751894644 | 0.857266523 |
| 216517_at   | -0.04519883 | -1.16288104 | 0.249594208 | 0.422039937 |
| 216518_at   | -0.02342044 | -0.65615366 | 0.514295002 | 0.684848109 |
| 216519_s_at | -0.03738044 | -1.1118702  | 0.27073741  | 0.446503425 |
| 216520_s_at | -0.08129518 | -1.83002119 | 0.072337281 | 0.169872905 |
| 216521_s_at | -0.13455265 | -4.41854379 | 4.36E-05    | 0.000366732 |
| 216522_at   | 0.025008786 | 0.985031323 | 0.3286607   | 0.511171185 |
| 216524_x_at | 0.208357595 | 3.362343761 | 0.001366536 | 0.006620406 |
| 216525_x_at | -0.06777721 | -1.19272851 | 0.237785636 | 0.407247198 |
| 216526_x_at | 0.369260339 | 3.85684789  | 0.000288316 | 0.001800647 |
| 216527_at   | 0.080992203 | 2.280346078 | 0.026243586 | 0.076628665 |
| 216528_at   | -0.00434687 | -0.14062249 | 0.888650723 | 0.940318537 |
| 216529_at   | -0.00996782 | -0.34991467 | 0.727657983 | 0.841083423 |

|             |             |             |             |             |
|-------------|-------------|-------------|-------------|-------------|
| 216530_at   | 0.080837225 | 2.109564121 | 0.039179951 | 0.105084941 |
| 216531_at   | -0.03242571 | -0.95983216 | 0.341085649 | 0.524021995 |
| 216532_x_at | -0.12182097 | -3.00097322 | 0.003949796 | 0.016227642 |
| 216533_at   | -0.02008002 | -1.16254166 | 0.249730853 | 0.422156414 |
| 216534_at   | 0.048054558 | 1.491306554 | 0.141247954 | 0.281777153 |
| 216535_at   | -0.05926947 | -1.10547944 | 0.273472571 | 0.449570961 |
| 216536_at   | -0.03875956 | -1.17190516 | 0.245980462 | 0.417442901 |
| 216537_s_at | 0.01099608  | 0.255334802 | 0.799359105 | 0.886367396 |
| 216538_at   | -0.04449168 | -1.26204857 | 0.211934171 | 0.376955545 |
| 216539_at   | -0.03383876 | -0.70262613 | 0.48507225  | 0.659915398 |
| 216540_at   | 0.012456432 | 0.430514168 | 0.668401878 | 0.800198675 |
| 216541_x_at | -0.0203437  | -0.61396695 | 0.541614784 | 0.706728823 |
| 216542_x_at | 0.047175308 | 1.671083597 | 0.100041024 | 0.217678475 |
| 216543_at   | -0.01729745 | -0.49304279 | 0.623825988 | 0.76908922  |
| 216544_at   | -0.01688788 | -0.55153244 | 0.583367034 | 0.739102466 |
| 216545_at   | -0.07130962 | -1.60050404 | 0.11486783  | 0.241595983 |
| 216546_s_at | -0.01608752 | -0.17419941 | 0.862309515 | 0.925106996 |
| 216547_at   | -0.05869539 | -1.51337675 | 0.135562142 | 0.273498701 |
| 216548_x_at | 0.033070933 | 0.963301647 | 0.339356861 | 0.522227699 |
| 216549_s_at | 0.00232139  | 0.100092994 | 0.920612347 | 0.958253247 |
| 216550_x_at | 0.060737632 | 1.861220073 | 0.067734411 | 0.161682759 |
| 216551_x_at | -0.03407834 | -1.10064314 | 0.27555528  | 0.451947468 |
| 216552_x_at | 0.007849648 | 0.238392502 | 0.812408833 | 0.894730793 |
| 216553_x_at | 0.029520102 | 0.988957077 | 0.326752466 | 0.508947172 |
| 216554_s_at | 0.030031279 | 0.764665234 | 0.447541109 | 0.627158233 |
| 216555_at   | 0.044350987 | 1.422074327 | 0.160308719 | 0.308762165 |
| 216556_x_at | -0.01540794 | -0.78255602 | 0.437040643 | 0.617619619 |
| 216557_x_at | 0.002268732 | 0.050441657 | 0.959942083 | 0.979506566 |
| 216558_x_at | 0.009339057 | 0.387278604 | 0.699953785 | 0.822713156 |
| 216559_x_at | 0.012394496 | 0.32856671  | 0.743655157 | 0.851470199 |
| 216560_x_at | 0.000456457 | 0.011854105 | 0.990582303 | 0.995549805 |
| 216561_x_at | 0.013314995 | 0.494508083 | 0.622797319 | 0.768323565 |
| 216562_at   | -0.06528314 | -1.48026172 | 0.144163116 | 0.285992223 |
| 216563_at   | -0.00254447 | -0.06121596 | 0.951395651 | 0.975105834 |
| 216564_at   | -0.04902951 | -1.09218528 | 0.279224215 | 0.456123711 |
| 216565_x_at | 0.332252164 | 3.33494564  | 0.001484559 | 0.00710287  |
| 216566_at   | -0.04700918 | -1.1856753  | 0.240538922 | 0.410562385 |
| 216567_at   | 0.029630942 | 0.8215324   | 0.414674932 | 0.596884024 |
| 216568_x_at | 0.124690252 | 3.959207241 | 0.00020615  | 0.001350127 |
| 216569_at   | 0.028531919 | 0.89078228  | 0.376690877 | 0.559416119 |
| 216570_x_at | 0.016909429 | 0.440545256 | 0.661164063 | 0.795390157 |
| 216571_at   | -0.01654859 | -0.25447065 | 0.800023361 | 0.886903905 |
| 216572_at   | -0.04272061 | -0.75676465 | 0.452224563 | 0.631570462 |
| 216573_at   | -0.0279163  | -0.57504347 | 0.567464567 | 0.727111333 |
| 216574_s_at | -0.02634578 | -0.71755844 | 0.475882029 | 0.651816471 |
| 216575_at   | -0.00332415 | -0.16142951 | 0.872310731 | 0.931170401 |
| 216576_x_at | -0.02494467 | -0.5474721  | 0.586134819 | 0.7412223   |
| 216577_at   | -0.0333347  | -0.86765304 | 0.38912561  | 0.572009399 |
| 216578_at   | 0.011506305 | 0.198358009 | 0.843451916 | 0.913964529 |
| 216579_at   | 0.003888794 | 0.069684675 | 0.944682032 | 0.971451783 |
| 216580_at   | 0.023871627 | 1.394443767 | 0.168450965 | 0.320371146 |
| 216581_at   | 0.037980806 | 1.725328909 | 0.089741752 | 0.200543486 |
| 216582_at   | 0.021367223 | 0.560490598 | 0.577282791 | 0.734422964 |
| 216583_x_at | -0.15177707 | -4.60205477 | 2.29E-05    | 0.000214252 |
| 216584_at   | -0.05025746 | -0.80492083 | 0.424121072 | 0.605662671 |
| 216585_at   | -0.01066546 | -0.33114617 | 0.741716027 | 0.850186527 |
| 216586_at   | -0.03403458 | -1.0335479  | 0.305596653 | 0.485608022 |
| 216587_s_at | 0.000927319 | 0.025618274 | 0.979648902 | 0.989814589 |
| 216588_at   | 0.026651383 | 1.456288207 | 0.150653314 | 0.295164522 |
| 216589_at   | 0.003702855 | 0.108327836 | 0.914105927 | 0.954246988 |
| 216590_at   | -0.02296877 | -0.70487598 | 0.483681283 | 0.65870384  |
| 216591_s_at | -0.12778765 | -1.77466348 | 0.081150617 | 0.185703194 |
| 216592_at   | -0.06441504 | -1.68423391 | 0.097459374 | 0.213376493 |
| 216593_s_at | -0.00821455 | -0.24767918 | 0.805248941 | 0.890333878 |
| 216594_x_at | 0.382037235 | 5.512791256 | 8.33E-07    | 1.38E-05    |
| 216595_at   | -0.01655323 | -0.61526722 | 0.540761764 | 0.706231889 |
| 216596_at   | -0.10920493 | -2.30541818 | 0.024703982 | 0.07301087  |
| 216597_at   | 0.019183176 | 0.39497007  | 0.694299828 | 0.818767426 |
| 216598_s_at | 0.451867336 | 2.670508536 | 0.009788062 | 0.034298892 |
| 216599_x_at | 0.037487692 | 0.865518871 | 0.390285761 | 0.57314092  |
| 216600_x_at | 0.0208263   | 0.57187413  | 0.569595789 | 0.728428048 |
| 216601_at   | -0.01146645 | -0.31455395 | 0.75421823  | 0.858693432 |
| 216602_s_at | -0.37603134 | -5.38309088 | 1.35E-06    | 2.04E-05    |
| 216603_at   | -0.08972358 | -1.97885338 | 0.052540933 | 0.132596949 |
| 216604_s_at | -0.10967984 | -2.20140529 | 0.031660568 | 0.088902621 |

|             |             |             |             |             |
|-------------|-------------|-------------|-------------|-------------|
| 216605_s_at | 0.027236853 | 0.731014186 | 0.467685123 | 0.644815595 |
| 216606_x_at | -0.04849569 | -1.53351797 | 0.130532964 | 0.266006075 |
| 216607_s_at | -0.28482024 | -3.22644875 | 0.002053268 | 0.009311258 |
| 216608_at   | 0.021968066 | 0.564026693 | 0.574889597 | 0.732480422 |
| 216609_at   | -0.07786248 | -2.47026507 | 0.016433747 | 0.052427513 |
| 216610_at   | 0.005614001 | 0.132218152 | 0.895264948 | 0.943908355 |
| 216611_s_at | -0.03776927 | -0.69408049 | 0.490375796 | 0.664617961 |
| 216612_x_at | 0.017779144 | 0.684532077 | 0.496339308 | 0.669455149 |
| 216613_at   | -0.09171699 | -4.24769316 | 7.83E-05    | 0.000600917 |
| 216614_at   | 0.136220069 | 2.529495749 | 0.014134975 | 0.046235841 |
| 216615_s_at | -0.04874378 | -0.92913861 | 0.356631097 | 0.539759456 |
| 216616_at   | -0.05901439 | -1.22255456 | 0.226395193 | 0.393957407 |
| 216617_s_at | 0.050663288 | 0.297808585 | 0.766903168 | 0.866237935 |
| 216618_at   | -0.07571561 | -1.48450528 | 0.143037528 | 0.284322496 |
| 216619_at   | -0.01837497 | -1.18347308 | 0.241403283 | 0.411707518 |
| 216620_s_at | 0.414561787 | 6.305764533 | 4.10E-08    | 1.27E-06    |
| 216621_at   | 0.158973201 | 4.521983647 | 3.04E-05    | 0.000271122 |
| 216622_at   | -0.08051654 | -2.20812253 | 0.031164045 | 0.087806299 |
| 216623_x_at | 0.036618306 | 0.85348615  | 0.396867105 | 0.579273805 |
| 216624_s_at | -0.01818179 | -0.46215944 | 0.645679316 | 0.785049494 |
| 216625_at   | -0.00585668 | -0.21162661 | 0.833133076 | 0.907662074 |
| 216626_at   | -0.00687932 | -0.16847555 | 0.866789665 | 0.927869789 |
| 216627_s_at | 0.031035968 | 0.743929686 | 0.459893369 | 0.638404479 |
| 216628_at   | 0.106432784 | 2.986255606 | 0.004118168 | 0.016794339 |
| 216629_at   | -0.06934128 | -1.33748446 | 0.186235693 | 0.344006844 |
| 216630_at   | -0.00120841 | -0.02746186 | 0.978184725 | 0.988871762 |
| 216631_s_at | -0.04890886 | -1.42006987 | 0.160888942 | 0.30957285  |
| 216632_at   | 0.005386302 | 0.196097671 | 0.845212559 | 0.915007139 |
| 216633_s_at | 0.036972389 | 1.353556431 | 0.181078974 | 0.337488421 |
| 216634_at   | -0.01230591 | -0.5012799  | 0.618053187 | 0.765428909 |
| 216635_at   | -0.01927229 | -0.53228365 | 0.596543224 | 0.749106765 |
| 216636_at   | -0.05623832 | -1.50462229 | 0.137795423 | 0.276767326 |
| 216637_at   | -0.06069628 | -1.39770216 | 0.167474524 | 0.319043965 |
| 216638_s_at | -0.01585435 | -0.47747343 | 0.63480219  | 0.777340041 |
| 216639_at   | -0.05004888 | -1.11456309 | 0.269590669 | 0.445253001 |
| 216640_s_at | -0.0033974  | -0.04777597 | 0.962057336 | 0.980756335 |
| 216641_s_at | 0.007111449 | 0.121076976 | 0.904044516 | 0.949108704 |
| 216642_at   | -0.02077419 | -0.61809455 | 0.538909325 | 0.704943086 |
| 216643_at   | -0.04437894 | -1.34904292 | 0.182516042 | 0.339408602 |
| 216644_at   | 0.027649298 | 0.634185178 | 0.52842939  | 0.696048871 |
| 216645_at   | 0.088682604 | 1.874945973 | 0.065789055 | 0.158043671 |
| 216646_at   | 0.02107748  | 0.512262106 | 0.610394064 | 0.759394581 |
| 216647_at   | 0.002921104 | 0.056356527 | 0.955249617 | 0.976978715 |
| 216648_s_at | 0.010907322 | 0.489654098 | 0.626207803 | 0.771019867 |
| 216649_at   | 0.068606222 | 1.831837596 | 0.072062275 | 0.169416554 |
| 216650_at   | 0.020627533 | 0.58433941  | 0.5612362   | 0.722658914 |
| 216651_s_at | -0.28922311 | -5.59253016 | 6.18E-07    | 1.07E-05    |
| 216652_s_at | -0.10050039 | -2.36305746 | 0.021465007 | 0.0652284   |
| 216653_at   | -0.02074809 | -0.57135506 | 0.569945211 | 0.728583032 |
| 216654_at   | -0.01597133 | -0.4309951  | 0.668054137 | 0.799953795 |
| 216655_s_at | -0.03730589 | -0.95913389 | 0.341434284 | 0.524341318 |
| 216656_at   | 0.003628408 | 0.103311261 | 0.918068892 | 0.956641057 |
| 216657_at   | 0.008717266 | 0.457943376 | 0.648687706 | 0.786878181 |
| 216658_at   | 0.023858755 | 0.557912498 | 0.579030652 | 0.735798043 |
| 216659_at   | -0.0272718  | -1.48399213 | 0.143173271 | 0.284500459 |
| 216660_at   | 0.057724138 | 2.290655903 | 0.025600478 | 0.075104145 |
| 216661_x_at | -0.04828572 | -0.78505483 | 0.435585712 | 0.61616752  |
| 216662_at   | -0.00706567 | -0.16785362 | 0.867276723 | 0.92819108  |
| 216663_s_at | 0.250767454 | 2.772129404 | 0.007454886 | 0.027423967 |
| 216664_at   | -0.01861923 | -0.60643166 | 0.546571704 | 0.710463632 |
| 216665_s_at | -0.02800265 | -0.521667   | 0.603869533 | 0.754469742 |
| 216666_at   | 0.039614522 | 1.310792157 | 0.19504479  | 0.35528599  |
| 216667_at   | -0.01833738 | -0.45161479 | 0.653214538 | 0.789840493 |
| 216668_at   | -0.03294499 | -0.58296562 | 0.562154514 | 0.723174621 |
| 216669_at   | 0.007329037 | 0.257533719 | 0.79766952  | 0.885351044 |
| 216670_at   | 0.076170881 | 1.355105687 | 0.180587695 | 0.336843152 |
| 216671_x_at | -0.01814494 | -0.46959946 | 0.64038496  | 0.781393088 |
| 216672_s_at | -0.00331029 | -0.10618324 | 0.915799837 | 0.955200062 |
| 216673_at   | -0.0030907  | -0.05952763 | 0.952734522 | 0.975755703 |
| 216674_at   | 0.007863524 | 0.242173352 | 0.809491872 | 0.892992639 |
| 216675_at   | -0.01376992 | -0.41662672 | 0.678474495 | 0.807326663 |
| 216676_x_at | -0.00418987 | -0.09404642 | 0.925393294 | 0.960860757 |
| 216677_at   | 0.023091694 | 0.632101597 | 0.529780417 | 0.697159955 |
| 216678_at   | 0.02658999  | 0.694064206 | 0.490385929 | 0.664617961 |
| 216679_at   | -0.02471951 | -0.54429464 | 0.588305122 | 0.743041755 |

|             |             |             |             |             |
|-------------|-------------|-------------|-------------|-------------|
| 216680_s_at | -0.01860654 | -0.25613829 | 0.798741616 | 0.885966453 |
| 216681_at   | -0.01483223 | -0.47511949 | 0.636468959 | 0.778432321 |
| 216682_s_at | 0.095263075 | 3.849259453 | 0.000295525 | 0.001839095 |
| 216683_at   | 0.030528157 | 1.179951883 | 0.242789987 | 0.413474631 |
| 216684_s_at | -0.0227286  | -0.58618216 | 0.560005582 | 0.72153397  |
| 216685_s_at | 0.018955671 | 0.641556411 | 0.523664254 | 0.692291393 |
| 216686_at   | -0.00485191 | -0.30888863 | 0.758502408 | 0.86112413  |
| 216687_x_at | -0.0196979  | -0.53075153 | 0.597597941 | 0.749883401 |
| 216688_at   | -0.05806889 | -1.28403501 | 0.204186269 | 0.367208271 |
| 216689_x_at | -0.01333529 | -0.28837742 | 0.774076019 | 0.870708886 |
| 216690_at   | 0.009128388 | 0.248835601 | 0.804358512 | 0.889728839 |
| 216691_at   | -0.04598601 | -1.36554415 | 0.177304022 | 0.332368187 |
| 216692_at   | -0.0198651  | -0.35690165 | 0.722448191 | 0.837813445 |
| 216693_x_at | -0.32477674 | -5.68058668 | 4.44E-07    | 8.22E-06    |
| 216694_at   | -0.08280591 | -1.43234075 | 0.157362333 | 0.304636463 |
| 216695_s_at | -0.03178962 | -1.30355668 | 0.197485849 | 0.358446881 |
| 216696_s_at | 0.031840517 | 0.661270897 | 0.511031788 | 0.68182957  |
| 216697_at   | 0.019627285 | 1.290659245 | 0.201893866 | 0.364228824 |
| 216698_x_at | 0.11100436  | 2.63499387  | 0.010749545 | 0.036958124 |
| 216699_s_at | -0.08857191 | -1.7809651  | 0.080104249 | 0.183901941 |
| 216700_at   | 0.017112506 | 0.410581976 | 0.682877383 | 0.81042955  |
| 216701_at   | -0.03105551 | -0.6813189  | 0.498355003 | 0.67136343  |
| 216702_x_at | 0.047494535 | 1.447852305 | 0.152990706 | 0.29844874  |
| 216703_at   | -0.09520195 | -1.99209113 | 0.051029719 | 0.129521819 |
| 216704_at   | 0.062460708 | 2.016634251 | 0.048326526 | 0.124119827 |
| 216705_s_at | 0.020826312 | 0.543860419 | 0.588602005 | 0.74320669  |
| 216706_x_at | 0.009879674 | 0.360326555 | 0.719899232 | 0.835957991 |
| 216707_at   | 0.033065928 | 0.676748072 | 0.501230061 | 0.673571696 |
| 216708_x_at | 0.023270595 | 0.503645525 | 0.616399729 | 0.764071221 |
| 216709_at   | -0.06646086 | -1.25327941 | 0.215084449 | 0.380891319 |
| 216710_x_at | -0.03375663 | -1.39103445 | 0.169477321 | 0.321652812 |
| 216711_s_at | 0.05637781  | 1.189176381 | 0.239169375 | 0.408911925 |
| 216712_at   | 0.028939289 | 1.3180071   | 0.19263333  | 0.352228491 |
| 216713_at   | 0.129105711 | 1.699248855 | 0.094578715 | 0.208684865 |
| 216714_at   | 0.002670708 | 0.054274135 | 0.956901476 | 0.977929632 |
| 216715_at   | 0.097160278 | 3.208529265 | 0.002164989 | 0.009742994 |
| 216716_at   | -0.01531079 | -0.27953589 | 0.780818453 | 0.874741498 |
| 216717_at   | 0.015610971 | 0.585097004 | 0.560730104 | 0.722235257 |
| 216718_at   | 0.032664661 | 1.423458771 | 0.159908917 | 0.308217937 |
| 216719_s_at | 0.011644052 | 0.484266741 | 0.630002665 | 0.773965175 |
| 216720_at   | -0.01877342 | -0.50852403 | 0.612996193 | 0.76135404  |
| 216721_at   | -0.00114973 | -0.03168755 | 0.97482897  | 0.987265038 |
| 216722_at   | 0.004085017 | 0.174865074 | 0.861788779 | 0.924753635 |
| 216723_at   | -0.0218675  | -0.75354086 | 0.454143758 | 0.633372196 |
| 216724_at   | 0.088299198 | 1.858954    | 0.068060202 | 0.162269755 |
| 216725_at   | -0.0195979  | -0.4354417  | 0.664842469 | 0.798096687 |
| 216726_at   | -0.01104767 | -0.23461887 | 0.815322887 | 0.896529568 |
| 216727_at   | -0.01408124 | -0.42820585 | 0.670071933 | 0.801360847 |
| 216728_at   | -0.00998521 | -0.27247392 | 0.786216023 | 0.878150451 |
| 216729_at   | -0.0229063  | -0.60612907 | 0.546771236 | 0.710543459 |
| 216730_at   | 0.047694351 | 1.008971878 | 0.317138631 | 0.498402127 |
| 216731_s_at | 0.014085951 | 0.499449472 | 0.61933393  | 0.766271857 |
| 216732_at   | 0.007576957 | 0.145622782 | 0.884719226 | 0.9383907   |
| 216733_s_at | 0.277016939 | 3.124971451 | 0.002765567 | 0.011999134 |
| 216734_s_at | 0.025294303 | 0.628625725 | 0.532038229 | 0.699101862 |
| 216735_x_at | 0.086727783 | 1.913237867 | 0.060610094 | 0.148192377 |
| 216736_at   | -0.10055059 | -1.58302362 | 0.11880179  | 0.247667207 |
| 216737_at   | 0.211184859 | 4.164719774 | 0.000103815 | 0.000760853 |
| 216738_at   | -0.03219695 | -0.60938163 | 0.544628393 | 0.709022648 |
| 216739_at   | -0.01825988 | -0.46005508 | 0.647180154 | 0.786004114 |
| 216740_at   | -0.01024144 | -0.45430557 | 0.651288211 | 0.788651    |
| 216741_at   | -0.01994517 | -0.43894938 | 0.662313403 | 0.796129925 |
| 216742_at   | -0.01606743 | -0.50546475 | 0.615129538 | 0.763205871 |
| 216743_at   | -0.03557472 | -0.72805208 | 0.469482648 | 0.646239944 |
| 216744_at   | -0.02646065 | -0.84264835 | 0.402853309 | 0.585163809 |
| 216745_x_at | 0.245793582 | 4.398885769 | 4.66E-05    | 0.00038805  |
| 216746_at   | 0.007826677 | 0.358837178 | 0.721007299 | 0.836859062 |
| 216747_at   | -0.08980715 | -1.52165042 | 0.133477962 | 0.270402933 |
| 216748_at   | -0.03108663 | -0.76616982 | 0.44665241  | 0.6265274   |
| 216749_at   | -0.08338086 | -2.65099776 | 0.010306082 | 0.035727539 |
| 216750_at   | 0.062223065 | 1.656151053 | 0.103040097 | 0.222649906 |
| 216751_at   | 0.150746664 | 4.739538985 | 1.41E-05    | 0.000142044 |
| 216752_at   | -0.02169246 | -1.18235415 | 0.241843313 | 0.412253466 |
| 216753_at   | 0.002700118 | 0.067379904 | 0.946508772 | 0.97240058  |
| 216754_at   | -0.08877162 | -1.81024498 | 0.075388849 | 0.175346264 |

|             |             |             |             |             |
|-------------|-------------|-------------|-------------|-------------|
| 216755_at   | 0.076998547 | 2.015687678 | 0.048428449 | 0.124353015 |
| 216756_at   | 0.088338441 | 3.706524385 | 0.000468125 | 0.002708628 |
| 216757_at   | -0.04461856 | -0.92578178 | 0.358358613 | 0.541420612 |
| 216758_at   | -0.02637585 | -1.88137211 | 0.064894646 | 0.156416326 |
| 216759_at   | -0.05598854 | -1.33884826 | 0.185793837 | 0.343480037 |
| 216760_at   | -0.00788786 | -0.15601542 | 0.876557398 | 0.933859803 |
| 216761_at   | 0.098233772 | 1.816515472 | 0.074409816 | 0.173575004 |
| 216762_at   | 0.030493268 | 0.757917258 | 0.451539534 | 0.630907424 |
| 216763_at   | 0.008960065 | 0.291572679 | 0.771643621 | 0.869271324 |
| 216764_at   | 0.032878321 | 1.232004295 | 0.22287102  | 0.389982836 |
| 216765_at   | 0.02439525  | 0.935159947 | 0.353545867 | 0.536652919 |
| 216766_at   | 0.068462176 | 1.573009007 | 0.121103946 | 0.25127101  |
| 216767_at   | -0.04611804 | -1.32764245 | 0.189448034 | 0.348084671 |
| 216768_x_at | -0.02736224 | -0.46470496 | 0.643865819 | 0.783629291 |
| 216769_x_at | 0.06664092  | 3.25049875  | 0.001911833 | 0.008782298 |
| 216770_at   | 0.073132523 | 4.389941099 | 4.81E-05    | 0.000398285 |
| 216771_at   | 0.046264599 | 2.413054406 | 0.018968502 | 0.059059515 |
| 216772_at   | 0.010540637 | 0.317555198 | 0.751951783 | 0.857266523 |
| 216773_at   | 0.023477326 | 0.84338106  | 0.402446857 | 0.584706445 |
| 216774_at   | 0.002179521 | 0.040848462 | 0.967555642 | 0.983468294 |
| 216775_at   | 0.082783149 | 3.051844109 | 0.003415948 | 0.014344221 |
| 216776_at   | 0.069809458 | 1.628686782 | 0.108747323 | 0.231943083 |
| 216777_at   | 0.035920833 | 1.710158797 | 0.092529819 | 0.205206789 |
| 216778_s_at | -0.01022569 | -0.4818342  | 0.631719443 | 0.775264447 |
| 216779_at   | -0.07137857 | -1.8968051  | 0.062788583 | 0.152430913 |
| 216780_at   | -0.03659482 | -0.781813   | 0.437473824 | 0.617977753 |
| 216781_at   | -0.02127418 | -0.61736177 | 0.539389122 | 0.705178135 |
| 216782_at   | -0.02029939 | -0.42879475 | 0.669645711 | 0.801044033 |
| 216783_at   | 0.000602833 | 0.025263665 | 0.979930541 | 0.989920113 |
| 216784_at   | -0.00990156 | -0.23382966 | 0.815932662 | 0.89699807  |
| 216785_at   | -0.05038715 | -1.24666193 | 0.217484567 | 0.383742755 |
| 216786_at   | -0.00501985 | -0.2288414  | 0.819789408 | 0.899600467 |
| 216787_at   | 0.017285073 | 0.433763622 | 0.666053766 | 0.798885562 |
| 216788_at   | 0.007788867 | 0.201172173 | 0.841261003 | 0.91274123  |
| 216789_at   | 0.033988692 | 0.500724087 | 0.618441961 | 0.765726452 |
| 216790_at   | -0.02420962 | -0.80082085 | 0.426472231 | 0.607752462 |
| 216791_at   | -0.03253744 | -0.60870331 | 0.545074928 | 0.70931886  |
| 216792_at   | -0.00895026 | -0.34983534 | 0.727717211 | 0.841108376 |
| 216793_x_at | -0.02286534 | -0.72231094 | 0.472977731 | 0.649111646 |
| 216794_at   | 0.0129805   | 0.303504131 | 0.76258129  | 0.863494971 |
| 216795_at   | -0.00912682 | -0.33312425 | 0.740230123 | 0.849294701 |
| 216796_s_at | 0.003654246 | 0.11477339  | 0.909017332 | 0.951847487 |
| 216797_at   | 0.030335347 | 0.922973753 | 0.359807837 | 0.542932727 |
| 216798_at   | 0.073175425 | 2.055946674 | 0.044253735 | 0.115953356 |
| 216799_at   | 0.011525635 | 0.327512247 | 0.74444834  | 0.852007304 |
| 216800_at   | -0.01626261 | -0.37118851 | 0.711836531 | 0.830724696 |
| 216801_at   | 0.051302731 | 1.431619338 | 0.157567989 | 0.304928924 |
| 216802_at   | 0.023164131 | 0.89267136  | 0.375686494 | 0.558573706 |
| 216803_at   | -0.01321667 | -0.4140603  | 0.680342468 | 0.808516117 |
| 216804_s_at | 0.143525033 | 2.044021207 | 0.045456631 | 0.118402363 |
| 216805_at   | 0.020482307 | 0.968667601 | 0.336694468 | 0.519454197 |
| 216806_at   | -0.05606883 | -1.3479217  | 0.182874368 | 0.339729172 |
| 216807_at   | -0.03879245 | -0.9134051  | 0.364774537 | 0.548130712 |
| 216808_at   | -0.08561338 | -2.2494661  | 0.028256304 | 0.081148358 |
| 216809_at   | 0.023540949 | 0.748693887 | 0.45703811  | 0.63597478  |
| 216810_at   | -0.01457743 | -0.59006363 | 0.557417873 | 0.719462819 |
| 216811_at   | 0.022745855 | 0.482042043 | 0.63157268  | 0.77514819  |
| 216812_at   | 0.015150188 | 0.334830266 | 0.738949394 | 0.848626845 |
| 216813_at   | 0.457688935 | 4.347030252 | 5.58E-05    | 0.000451918 |
| 216814_at   | -0.00504889 | -0.2086738  | 0.835426961 | 0.909081877 |
| 216815_at   | -0.02460841 | -0.51004672 | 0.611935619 | 0.76059256  |
| 216816_at   | -0.00802261 | -0.26214916 | 0.794126315 | 0.882863017 |
| 216817_s_at | -0.01105586 | -0.32513631 | 0.746236572 | 0.853167885 |
| 216818_s_at | 0.010127401 | 0.215092904 | 0.83044215  | 0.906070794 |
| 216819_at   | 0.033462467 | 1.354104931 | 0.180904925 | 0.337294199 |
| 216820_at   | -0.03894782 | -0.82508997 | 0.412668635 | 0.594994119 |
| 216821_at   | -0.06266993 | -0.94505142 | 0.348515334 | 0.531580741 |
| 216822_x_at | -0.06743717 | -3.53558371 | 0.000802513 | 0.00423997  |
| 216823_at   | -0.01768887 | -0.77093051 | 0.443847249 | 0.624061576 |
| 216824_at   | -0.05924566 | -1.57128012 | 0.121504982 | 0.251902683 |
| 216825_s_at | 0.041348488 | 0.79343422  | 0.430727765 | 0.611530375 |
| 216826_at   | -0.00053806 | -0.01419012 | 0.98872653  | 0.994786881 |
| 216827_at   | -0.07157537 | -1.84690663 | 0.069814512 | 0.165376063 |
| 216828_at   | -0.04157597 | -1.04589729 | 0.299906031 | 0.479231243 |
| 216829_at   | -0.00865465 | -0.34229419 | 0.733354886 | 0.844588378 |



|             |             |             |             |             |
|-------------|-------------|-------------|-------------|-------------|
| 216830_at   | -0.00463709 | -0.1188958  | 0.905764794 | 0.950088957 |
| 216831_s_at | -0.06203939 | -1.97930409 | 0.052488856 | 0.132495452 |
| 216832_at   | 0.000162052 | 0.003974729 | 0.996842142 | 0.998562569 |
| 216833_x_at | 0.05191316  | 2.046858122 | 0.045167944 | 0.117835978 |
| 216834_at   | 0.637689726 | 1.946390563 | 0.056410138 | 0.1402237   |
| 216835_s_at | 0.135331534 | 2.397883742 | 0.019697012 | 0.060827728 |
| 216836_s_at | 0.534026044 | 7.661476875 | 2.14E-10    | 3.39E-08    |
| 216837_at   | -0.02842725 | -0.73619076 | 0.464553182 | 0.642303267 |
| 216838_at   | -0.04375568 | -1.00103213 | 0.320929377 | 0.502800163 |
| 216839_at   | 0.006073611 | 0.309235384 | 0.758239969 | 0.860978701 |
| 216840_s_at | 0.11023084  | 2.914055646 | 0.005045207 | 0.019865043 |
| 216841_s_at | 0.338850172 | 2.319970368 | 0.023847656 | 0.071039089 |
| 216842_x_at | -0.00118076 | -0.02271111 | 0.98195792  | 0.990915448 |
| 216843_x_at | -0.11908797 | -2.11533554 | 0.038665244 | 0.104029082 |
| 216844_at   | -0.00760078 | -0.27363681 | 0.785326471 | 0.877537623 |
| 216845_x_at | -0.00068875 | -0.01680622 | 0.986648328 | 0.993472729 |
| 216846_at   | -0.08024689 | -1.71637583 | 0.091378698 | 0.20329656  |
| 216847_at   | 0.002181605 | 0.069344893 | 0.944951322 | 0.971559871 |
| 216848_at   | 0.067660649 | 1.453459403 | 0.151433978 | 0.296270577 |
| 216849_at   | -0.07768851 | -1.08046333 | 0.284365204 | 0.461837695 |
| 216850_at   | -0.22722114 | -2.96646918 | 0.004355066 | 0.017604615 |
| 216851_at   | -0.06332639 | -1.51241549 | 0.13580595  | 0.273798832 |
| 216852_x_at | 0.056447656 | 1.697073736 | 0.094991632 | 0.209314213 |
| 216853_x_at | -0.05264579 | -1.18442001 | 0.241031342 | 0.411215031 |
| 216854_at   | 0.005744475 | 0.169120234 | 0.86628484  | 0.927684911 |
| 216855_s_at | -0.05818715 | -1.82565686 | 0.073001647 | 0.171031119 |
| 216856_s_at | -0.01025353 | -0.47039779 | 0.63981797  | 0.781063772 |
| 216857_at   | -0.0487121  | -1.07245007 | 0.287917238 | 0.466082193 |
| 216858_x_at | 0.376942099 | 5.719169404 | 3.84E-07    | 7.31E-06    |
| 216859_x_at | 0.185098354 | 4.554593104 | 2.71E-05    | 0.000246604 |
| 216860_s_at | -0.00645079 | -0.16994613 | 0.865638196 | 0.927414653 |
| 216861_at   | 0.024937185 | 0.788341988 | 0.433676129 | 0.614513561 |
| 216862_s_at | 0.093128441 | 2.002807562 | 0.049833827 | 0.12715806  |
| 216863_s_at | 0.152450967 | 3.177189419 | 0.002374234 | 0.010526711 |
| 216864_at   | 0.014092792 | 0.379670277 | 0.705563464 | 0.826445874 |
| 216865_at   | 0.033132898 | 0.953579326 | 0.344215914 | 0.527001392 |
| 216866_s_at | 0.020469033 | 0.572575658 | 0.569123709 | 0.728070711 |
| 216867_s_at | 0.033821072 | 0.905850899 | 0.368726499 | 0.551972022 |
| 216868_s_at | -0.00335072 | -0.13217422 | 0.895299545 | 0.943908355 |
| 216869_at   | 0.018421326 | 0.436225896 | 0.664276716 | 0.797524647 |
| 216870_x_at | 0.040874825 | 1.445319292 | 0.153698042 | 0.299397327 |
| 216871_at   | -0.0367819  | -0.93912544 | 0.351523497 | 0.534763705 |
| 216872_at   | 0.015668228 | 0.676819509 | 0.501185058 | 0.67353194  |
| 216873_s_at | 0.061137963 | 1.590684868 | 0.11706449  | 0.245097263 |
| 216874_at   | 0.001789123 | 0.064873045 | 0.948496012 | 0.973591727 |
| 216875_x_at | 0.151177702 | 2.19275245  | 0.032310413 | 0.090393797 |
| 216876_s_at | -0.02127449 | -1.14178296 | 0.25819109  | 0.432029511 |
| 216877_at   | 0.049007102 | 1.020677645 | 0.311604986 | 0.492546157 |
| 216878_x_at | -0.00018364 | -0.00529482 | 0.995793359 | 0.997954523 |
| 216879_at   | 0.040545501 | 0.949971413 | 0.346030621 | 0.529116531 |
| 216880_at   | -0.0294254  | -1.02409633 | 0.310001272 | 0.490643166 |
| 216881_x_at | -0.07873267 | -1.61398172 | 0.111907013 | 0.236940887 |
| 216882_s_at | -0.0028628  | -0.06024196 | 0.952168023 | 0.975492671 |
| 216883_x_at | -0.13754112 | -3.84720008 | 0.000297512 | 0.001850061 |
| 216884_at   | -0.04436696 | -1.08085516 | 0.284192304 | 0.461621613 |
| 216885_s_at | 0.005878174 | 0.158146595 | 0.874885317 | 0.932710371 |
| 216886_at   | 0.009328736 | 0.244047512 | 0.808046944 | 0.892169426 |
| 216887_s_at | 0.057825399 | 1.055212233 | 0.295661939 | 0.474613821 |
| 216888_at   | 0.037294654 | 0.812899025 | 0.419568268 | 0.601757163 |
| 216889_s_at | 0.08795862  | 1.990605411 | 0.051197447 | 0.129851671 |
| 216890_at   | -0.04553159 | -1.08900552 | 0.280612339 | 0.457768341 |
| 216891_at   | 0.029275103 | 0.834314391 | 0.407494073 | 0.589830536 |
| 216892_at   | -0.0455768  | -0.82941967 | 0.410234874 | 0.592439234 |
| 216893_s_at | 0.006911949 | 0.320146115 | 0.749996968 | 0.855961705 |
| 216894_x_at | 0.278092818 | 3.387572245 | 0.001265758 | 0.006204811 |
| 216895_at   | -0.1459118  | -3.86704672 | 0.000278893 | 0.001749617 |
| 216896_at   | 0.009160242 | 0.448802155 | 0.655230643 | 0.791084309 |
| 216897_s_at | 0.058982718 | 1.530864708 | 0.131186857 | 0.267046368 |
| 216898_s_at | 0.024831331 | 1.018007523 | 0.312861444 | 0.493885898 |
| 216899_s_at | -0.01354508 | -0.46116483 | 0.646388493 | 0.785438627 |
| 216900_s_at | 0.010780408 | 0.257196749 | 0.797928375 | 0.885547925 |
| 216901_s_at | -0.03170982 | -0.82767804 | 0.411212805 | 0.593448807 |
| 216902_s_at | -0.09844225 | -1.59436473 | 0.116237331 | 0.243762091 |
| 216903_s_at | -0.20374014 | -5.10778319 | 3.73E-06    | 4.73E-05    |
| 216904_at   | 0.008128744 | 0.242821648 | 0.808991977 | 0.892705599 |

|             |             |             |             |             |
|-------------|-------------|-------------|-------------|-------------|
| 216905_s_at | -0.06628436 | -1.46606499 | 0.147979433 | 0.291433341 |
| 216906_at   | -0.06068605 | -1.60098468 | 0.114761166 | 0.241439817 |
| 216907_x_at | -0.01858359 | -0.41025565 | 0.683115387 | 0.810533591 |
| 216908_x_at | -0.20136805 | -3.56539087 | 0.000731226 | 0.003937343 |
| 216909_at   | 0.100302467 | 2.980812562 | 0.004182112 | 0.017025591 |
| 216910_at   | 0.069383866 | 1.448889829 | 0.152701715 | 0.298015067 |
| 216911_s_at | -0.0049641  | -0.10941154 | 0.913250114 | 0.953997126 |
| 216912_at   | 0.01125673  | 0.292646477 | 0.770826704 | 0.868830415 |
| 216913_s_at | -0.13626039 | -3.54668222 | 0.000775229 | 0.004128521 |
| 216914_at   | 0.000757373 | 0.015703755 | 0.987524106 | 0.994032378 |
| 216915_s_at | -0.03179626 | -0.93355913 | 0.354364403 | 0.537540196 |
| 216916_s_at | -0.07406011 | -2.8641613  | 0.005795142 | 0.022254381 |
| 216917_s_at | 0.009408577 | 0.509688434 | 0.612185096 | 0.76076195  |
| 216918_s_at | -0.03305433 | -0.70967325 | 0.480722794 | 0.65597062  |
| 216919_at   | 0.015142657 | 0.382967403 | 0.703130429 | 0.82480656  |
| 216920_s_at | 0.182537022 | 1.735938185 | 0.087833422 | 0.197367956 |
| 216921_s_at | -0.02604495 | -0.72296526 | 0.472578654 | 0.648783105 |
| 216922_x_at | -0.01102751 | -0.18753693 | 0.851887892 | 0.918695374 |
| 216923_at   | 0.010669056 | 0.256809855 | 0.798225609 | 0.885723836 |
| 216924_s_at | -0.50944884 | -8.60107232 | 5.63E-12    | 4.41E-09    |
| 216925_s_at | 0.025336908 | 0.660096245 | 0.511779869 | 0.682588674 |
| 216926_s_at | 0.032536455 | 0.970307581 | 0.335883525 | 0.518668596 |
| 216927_at   | -0.0431468  | -1.27460538 | 0.207482941 | 0.371239794 |
| 216928_at   | -0.01282173 | -0.27227988 | 0.786364476 | 0.878198853 |
| 216929_x_at | 0.051220088 | 0.456351074 | 0.649825434 | 0.787857368 |
| 216930_at   | -0.03905244 | -1.54618218 | 0.127447546 | 0.261257515 |
| 216931_at   | -0.0205642  | -0.51703276 | 0.607080464 | 0.756810045 |
| 216932_at   | -0.02886077 | -0.74015587 | 0.462162326 | 0.640283076 |
| 216933_x_at | 0.275209152 | 3.473133014 | 0.000973887 | 0.004985678 |
| 216934_at   | 0.064840373 | 1.821324593 | 0.073666191 | 0.172251009 |
| 216935_at   | 0.037009563 | 1.017407191 | 0.313144408 | 0.49417549  |
| 216936_at   | -0.00317649 | -0.04943559 | 0.960740378 | 0.980060007 |
| 216937_s_at | 0.041735707 | 1.212288551 | 0.23026982  | 0.398266981 |
| 216938_x_at | -0.75905912 | -8.73189839 | 3.40E-12    | 3.54E-09    |
| 216939_s_at | -0.07247341 | -1.35748155 | 0.179836266 | 0.335864065 |
| 216940_x_at | -0.02095137 | -0.32194493 | 0.74864075  | 0.855068974 |
| 216941_s_at | 0.105175972 | 3.220602185 | 0.002089109 | 0.009453872 |
| 216942_s_at | 0.058246613 | 1.277246391 | 0.206555655 | 0.370054732 |
| 216943_at   | 0.011092178 | 0.266663762 | 0.790664735 | 0.880725019 |
| 216944_s_at | -0.90928656 | -7.3660262  | 6.75E-10    | 7.15E-08    |
| 216945_x_at | -0.46890545 | -6.17300284 | 6.83E-08    | 1.87E-06    |
| 216946_at   | -0.01891323 | -0.57860437 | 0.565074719 | 0.725469516 |
| 216947_at   | 0.014511082 | 0.485098462 | 0.629416142 | 0.773566523 |
| 216948_at   | -0.0216778  | -1.1309425  | 0.262689292 | 0.437313188 |
| 216949_s_at | -0.11768371 | -2.28104417 | 0.026199593 | 0.076542414 |
| 216950_s_at | 0.25297343  | 1.921669898 | 0.059517425 | 0.146079015 |
| 216951_at   | 0.012437603 | 0.416454705 | 0.678599635 | 0.807411078 |
| 216952_s_at | 0.015114215 | 0.484199208 | 0.630050299 | 0.773981143 |
| 216953_s_at | -0.00511022 | -0.12545305 | 0.90059455  | 0.946961726 |
| 216954_x_at | -0.1064726  | -3.39128986 | 0.001251516 | 0.00614916  |
| 216955_at   | 0.035565688 | 0.963762809 | 0.339127507 | 0.522000569 |
| 216956_s_at | -0.05717975 | -1.22098721 | 0.226983644 | 0.39450273  |
| 216957_at   | 0.021328647 | 0.542192274 | 0.589743195 | 0.744059026 |
| 216958_s_at | -0.0212247  | -0.33046626 | 0.742226995 | 0.850597693 |
| 216959_x_at | -0.09810884 | -1.46427184 | 0.14846704  | 0.292149039 |
| 216960_s_at | 0.026482154 | 0.68883065  | 0.49364971  | 0.667237043 |
| 216961_s_at | -0.05620279 | -1.2925765  | 0.201233978 | 0.363390398 |
| 216962_at   | -0.05019997 | -1.48995421 | 0.141602375 | 0.282320367 |
| 216963_s_at | -0.53083235 | -5.26056649 | 2.13E-06    | 2.98E-05    |
| 216964_at   | -0.00082074 | -0.02375629 | 0.981127767 | 0.990502658 |
| 216965_x_at | -0.02282709 | -0.50484139 | 0.615564638 | 0.763574199 |
| 216966_at   | -0.02798411 | -1.12984406 | 0.263148163 | 0.437865061 |
| 216967_at   | -0.25782109 | -4.77640549 | 1.24E-05    | 0.000127058 |
| 216968_at   | -0.02685671 | -0.49232146 | 0.624332652 | 0.769580354 |
| 216969_s_at | -0.11823797 | -2.39680011 | 0.019749996 | 0.060961863 |
| 216970_at   | -0.04486357 | -1.43096065 | 0.157755945 | 0.305076763 |
| 216971_s_at | 0.202725332 | 1.860894573 | 0.067781127 | 0.16176835  |
| 216972_at   | -0.01486727 | -0.32998066 | 0.742592    | 0.850843258 |
| 216973_s_at | 6.37E-05    | 0.002185908 | 0.998263328 | 0.999112838 |
| 216974_at   | -0.01028331 | -0.61001662 | 0.54421055  | 0.708658195 |
| 216975_x_at | -0.04126053 | -0.87009966 | 0.387798264 | 0.570471018 |
| 216976_s_at | 0.139278348 | 3.929815015 | 0.000227094 | 0.001470062 |
| 216977_x_at | -0.14489964 | -2.39473172 | 0.019851484 | 0.061232834 |
| 216978_x_at | 0.021257493 | 1.040539237 | 0.302366072 | 0.481998954 |
| 216979_at   | 0.036043079 | 1.010837509 | 0.316252293 | 0.497461626 |

|             |             |             |             |             |
|-------------|-------------|-------------|-------------|-------------|
| 216980_s_at | -0.03721602 | -0.88162351 | 0.381584453 | 0.564283382 |
| 216981_x_at | -0.03647929 | -0.92690481 | 0.357780069 | 0.540802477 |
| 216982_x_at | -0.05292251 | -0.98179598 | 0.330238899 | 0.51278705  |
| 216983_s_at | 0.061539081 | 1.430863164 | 0.157783778 | 0.305095514 |
| 216984_x_at | -0.06742114 | -1.18659235 | 0.240179644 | 0.41015279  |
| 216985_s_at | -0.02171264 | -0.6137894  | 0.541731313 | 0.706800869 |
| 216986_s_at | -0.01388214 | -0.25363345 | 0.800667034 | 0.887353347 |
| 216987_at   | -0.0153016  | -0.87159438 | 0.386988737 | 0.569654838 |
| 216988_s_at | 0.276376261 | 3.217086539 | 0.002110943 | 0.009540121 |
| 216989_at   | -0.02854493 | -0.64273411 | 0.522905032 | 0.691655963 |
| 216990_at   | -0.03886764 | -1.58191907 | 0.119053963 | 0.248030147 |
| 216991_at   | -0.05408107 | -1.12720572 | 0.264252641 | 0.439114298 |
| 216992_s_at | -0.16909863 | -3.46067041 | 0.001012014 | 0.005145497 |
| 216993_s_at | -0.01577512 | -0.39400289 | 0.695009848 | 0.819302071 |
| 216994_s_at | 0.026977855 | 0.634950018 | 0.527933908 | 0.695724584 |
| 216995_x_at | 0.010667516 | 0.306739645 | 0.760129494 | 0.861854209 |
| 216996_s_at | -0.04794664 | -1.21432919 | 0.229495808 | 0.397281893 |
| 216997_x_at | -0.14144295 | -2.97247009 | 0.004281913 | 0.017361846 |
| 216998_s_at | -0.05176148 | -1.16112732 | 0.250300887 | 0.422816163 |
| 216999_at   | -0.00682754 | -0.31739621 | 0.752071789 | 0.85730736  |
| 217000_at   | -0.07215103 | -1.78192468 | 0.079945904 | 0.183604437 |
| 217001_x_at | -0.00140088 | -0.03284487 | 0.973909982 | 0.986782401 |
| 217002_s_at | -0.02603827 | -0.71091627 | 0.479957874 | 0.655350503 |
| 217003_s_at | -0.02931934 | -0.75256214 | 0.454727341 | 0.633766251 |
| 217004_s_at | -0.21535043 | -6.11016677 | 8.69E-08    | 2.26E-06    |
| 217005_at   | 0.074667341 | 1.589402834 | 0.117353776 | 0.245564891 |
| 217006_x_at | 0.059414189 | 1.492471678 | 0.140943161 | 0.281357502 |
| 217007_s_at | 0.04475043  | 1.25037144  | 0.216136729 | 0.382164216 |
| 217008_s_at | -0.19003694 | -3.80136442 | 0.000345183 | 0.002092069 |
| 217009_at   | 0.022138855 | 0.707771798 | 0.481894215 | 0.657071002 |
| 217010_s_at | -0.04147184 | -0.94016086 | 0.350996682 | 0.534216854 |
| 217011_at   | -0.02637692 | -0.67636782 | 0.501469646 | 0.673751847 |
| 217012_at   | 0.045414066 | 2.207833335 | 0.03118528  | 0.087843976 |
| 217013_at   | 0.056092734 | 1.764723423 | 0.082824256 | 0.188538768 |
| 217014_s_at | 0.13608542  | 2.026748348 | 0.047248975 | 0.122018443 |
| 217015_at   | -0.00788251 | -0.24529198 | 0.80708786  | 0.891418808 |
| 217016_x_at | 0.051641646 | 0.917556105 | 0.362614544 | 0.545747406 |
| 217017_at   | 0.057548129 | 1.133521756 | 0.26161404  | 0.436010392 |
| 217018_at   | 0.022069967 | 0.458972496 | 0.647952828 | 0.786419741 |
| 217019_at   | 0.006687302 | 0.300500641 | 0.764859453 | 0.864889501 |
| 217020_at   | -0.05199373 | -1.19476589 | 0.23699459  | 0.406343982 |
| 217021_at   | 0.024507658 | 1.286022329 | 0.2034965   | 0.366339869 |
| 217022_s_at | 0.001121692 | 0.02662522  | 0.978849175 | 0.989294894 |
| 217023_x_at | -0.01824446 | -0.46664324 | 0.642486397 | 0.782781802 |
| 217024_x_at | -0.09836327 | -2.19698219 | 0.031991301 | 0.089673558 |
| 217025_s_at | -0.31943505 | -6.38876323 | 2.98E-08    | 9.90E-07    |
| 217026_at   | -0.05076488 | -1.1353266  | 0.260863487 | 0.4351722   |
| 217027_x_at | 0.050644888 | 1.763414635 | 0.083046743 | 0.188905631 |
| 217028_at   | 0.680035569 | 4.528749889 | 2.97E-05    | 0.000266018 |
| 217029_at   | -0.02341205 | -0.49842379 | 0.620052116 | 0.766863216 |
| 217030_at   | 0.056434793 | 1.137064093 | 0.260142386 | 0.434221607 |
| 217031_at   | 0.064358074 | 1.809519626 | 0.075502794 | 0.175538204 |
| 217032_at   | -0.08012186 | -1.10422756 | 0.274010619 | 0.450223624 |
| 217033_x_at | -0.2284023  | -5.54279123 | 7.45E-07    | 1.25E-05    |
| 217034_at   | 0.04079102  | 1.274626734 | 0.207475432 | 0.371239794 |
| 217035_at   | 0.002160216 | 0.068650387 | 0.945501763 | 0.971946932 |
| 217036_at   | 0.014648439 | 0.560355443 | 0.577374358 | 0.734487498 |
| 217037_at   | -0.01258002 | -0.41156286 | 0.682162163 | 0.80996789  |
| 217038_at   | -0.04823176 | -1.18246534 | 0.24179956  | 0.412226051 |
| 217039_x_at | -0.14295237 | -2.83627858 | 0.006257883 | 0.023725593 |
| 217040_x_at | -0.11347585 | -1.70786731 | 0.092957103 | 0.205971188 |
| 217041_at   | 0.006047675 | 0.167577625 | 0.867492888 | 0.928285546 |
| 217042_at   | 0.016999965 | 0.558457666 | 0.578660835 | 0.735475074 |
| 217043_s_at | 0.140982405 | 2.384623245 | 0.020354215 | 0.062468795 |
| 217044_s_at | 0.015070183 | 0.375143799 | 0.708908701 | 0.828713548 |
| 217045_x_at | 0.013575344 | 0.327267127 | 0.744632762 | 0.852090927 |
| 217046_s_at | 0.027948564 | 0.62072499  | 0.53718882  | 0.703264478 |
| 217047_s_at | 0.278717434 | 3.489274078 | 0.000926532 | 0.004783798 |
| 217048_at   | 0.037732725 | 1.215303359 | 0.229126979 | 0.39684324  |
| 217049_x_at | -0.01526136 | -0.55919464 | 0.578161085 | 0.735069845 |
| 217050_at   | 0.021147266 | 0.525972441 | 0.600893448 | 0.752328831 |
| 217051_s_at | 0.007187217 | 0.158457477 | 0.874641452 | 0.932566939 |
| 217052_x_at | 0.02104475  | 0.507989505 | 0.613368695 | 0.76163241  |
| 217053_x_at | -0.15667879 | -3.30680656 | 0.001615759 | 0.007626901 |
| 217054_at   | 0.059973329 | 1.242884888 | 0.218863301 | 0.385612183 |

|             |             |             |             |             |
|-------------|-------------|-------------|-------------|-------------|
| 217055_x_at | -0.07984082 | -1.89914748 | 0.062474053 | 0.151834813 |
| 217056_at   | -0.00383917 | -0.18453257 | 0.85423318  | 0.920225354 |
| 217057_s_at | -0.07433481 | -1.2961109  | 0.200021731 | 0.361844615 |
| 217058_at   | -0.09068567 | -1.23039948 | 0.223466663 | 0.390607932 |
| 217059_at   | 0.001368697 | 0.049272075 | 0.960870125 | 0.980110562 |
| 217060_at   | -0.03143991 | -0.74937285 | 0.45663203  | 0.635479812 |
| 217061_s_at | -0.25307958 | -5.48202545 | 9.35E-07    | 1.51E-05    |
| 217062_at   | -0.00177605 | -0.03623807 | 0.971215766 | 0.98539928  |
| 217063_x_at | -0.01514714 | -0.41487375 | 0.679750179 | 0.808127799 |
| 217065_at   | -0.00366672 | -0.12032328 | 0.9046389   | 0.949437489 |
| 217066_s_at | 0.029525854 | 0.74695662  | 0.458078096 | 0.636699206 |
| 217067_s_at | -0.03158205 | -0.8213041  | 0.414803882 | 0.597031177 |
| 217068_at   | 0.002903282 | 0.176718557 | 0.860339168 | 0.923885773 |
| 217069_at   | -0.04879479 | -0.95836953 | 0.341816182 | 0.524819596 |
| 217070_at   | -0.03029213 | -0.91078505 | 0.366142123 | 0.549446771 |
| 217071_s_at | 0.019219165 | 0.524669653 | 0.601793267 | 0.752932223 |
| 217072_at   | 0.051887881 | 1.238066691 | 0.220631421 | 0.387566208 |
| 217073_x_at | 0.034958203 | 0.630310534 | 0.530943208 | 0.698114559 |
| 217074_at   | 0.028638224 | 0.575446937 | 0.567193536 | 0.726930494 |
| 217075_x_at | -0.03227291 | -1.43555101 | 0.156449704 | 0.303158609 |
| 217076_s_at | -0.03018627 | -1.21515367 | 0.229183625 | 0.396902574 |
| 217077_s_at | -0.28885757 | -3.43293981 | 0.001101995 | 0.00552134  |
| 217078_s_at | 0.054990272 | 1.826220042 | 0.07291563  | 0.170892302 |
| 217079_at   | -0.10539364 | -1.92154299 | 0.059533745 | 0.146103023 |
| 217080_s_at | 0.054698493 | 1.443633294 | 0.154170263 | 0.300068696 |
| 217081_at   | -0.00837473 | -0.21261945 | 0.832362114 | 0.907332202 |
| 217082_at   | -0.06042671 | -0.84943624 | 0.399097579 | 0.581465982 |
| 217083_at   | 0.023010344 | 0.817302506 | 0.417068068 | 0.599402067 |
| 217084_at   | -0.04608947 | -1.72350703 | 0.090072881 | 0.20101554  |
| 217085_at   | -0.00479652 | -0.19436118 | 0.846565704 | 0.915673527 |
| 217086_at   | 0.028873341 | 1.056566296 | 0.295048448 | 0.473935422 |
| 217087_at   | 0.112279934 | 2.971531047 | 0.004293284 | 0.017398934 |
| 217088_s_at | -0.00557588 | -0.11218159 | 0.911063045 | 0.952978153 |
| 217090_at   | 0.006880027 | 0.328905279 | 0.74340054  | 0.851244092 |
| 217091_at   | 0.010549795 | 0.48281603  | 0.631026267 | 0.774607174 |
| 217092_x_at | -0.08179567 | -2.83463562 | 0.006286186 | 0.023808663 |
| 217093_at   | -0.00681719 | -0.3106414  | 0.757176126 | 0.860369387 |
| 217094_s_at | 0.041307545 | 1.003654751 | 0.319673891 | 0.501246302 |
| 217095_x_at | -0.01675086 | -0.35250513 | 0.7257249   | 0.839826443 |
| 217096_at   | -0.04912893 | -1.27217796 | 0.208337963 | 0.372396922 |
| 217097_s_at | -0.10501965 | -2.69031683 | 0.009286589 | 0.032876761 |
| 217098_s_at | -0.01360281 | -0.35165573 | 0.726358553 | 0.840211628 |
| 217099_s_at | 0.002171332 | 0.067610523 | 0.946325972 | 0.972346891 |
| 217100_s_at | 0.178536042 | 3.050470581 | 0.003429431 | 0.014391374 |
| 217101_at   | 0.005935903 | 0.131632456 | 0.895726176 | 0.94414182  |
| 217102_at   | -0.02693124 | -0.67172566 | 0.504399527 | 0.676346344 |
| 217103_at   | -0.0428372  | -1.43549416 | 0.15646583  | 0.303176712 |
| 217104_at   | 0.001796573 | 0.064610833 | 0.948703893 | 0.973693292 |
| 217105_at   | -0.00174715 | -0.0810917  | 0.935645514 | 0.96656533  |
| 217106_x_at | -0.0561589  | -1.22512509 | 0.22543253  | 0.392804033 |
| 217107_at   | -0.00291093 | -0.10246452 | 0.918738007 | 0.95707051  |
| 217108_at   | 0.026445632 | 0.747683955 | 0.457642524 | 0.636378424 |
| 217109_at   | 0.052195737 | 1.609458661 | 0.112893693 | 0.238442576 |
| 217110_s_at | -0.02460087 | -1.02729606 | 0.308505345 | 0.489012976 |
| 217111_at   | -0.01446615 | -0.37570227 | 0.708495658 | 0.828252366 |
| 217112_at   | 0.016683568 | 0.547202046 | 0.586319124 | 0.741371462 |
| 217113_at   | -0.01778448 | -0.29224881 | 0.771129209 | 0.868990812 |
| 217114_at   | 0.027295792 | 0.773196731 | 0.442515552 | 0.622795024 |
| 217115_at   | 0.0270423   | 0.605473782 | 0.547203473 | 0.710772863 |
| 217117_x_at | -0.02611171 | -0.58266264 | 0.562357141 | 0.72332525  |
| 217118_s_at | 0.446332394 | 6.500322389 | 1.94E-08    | 7.22E-07    |
| 217119_s_at | -0.03335066 | -0.69928125 | 0.487144329 | 0.661585461 |
| 217120_s_at | 0.057412103 | 1.307101583 | 0.196287042 | 0.357039499 |
| 217121_at   | -0.01491817 | -0.50086536 | 0.618343137 | 0.765639482 |
| 217122_s_at | -0.24139144 | -3.75635535 | 0.000399074 | 0.002367321 |
| 217123_x_at | -0.01314602 | -0.68912106 | 0.493468293 | 0.667112888 |
| 217124_at   | 0.083117532 | 2.750274639 | 0.007908579 | 0.028813092 |
| 217125_at   | 0.02588532  | 0.888973671 | 0.377654066 | 0.560250797 |
| 217126_at   | -0.00758133 | -0.4688233  | 0.64093641  | 0.781782584 |
| 217127_at   | 0.181406909 | 4.4081182   | 4.52E-05    | 0.000377708 |
| 217128_s_at | -0.53748048 | -6.1406026  | 7.73E-08    | 2.06E-06    |
| 217129_at   | -0.0006853  | -0.02160843 | 0.982833762 | 0.991641329 |
| 217130_at   | -0.03885608 | -0.75460609 | 0.453509083 | 0.632788884 |
| 217131_at   | -0.02103447 | -1.12362283 | 0.265757782 | 0.440959599 |
| 217132_at   | -0.02988217 | -1.26281892 | 0.211659071 | 0.376646117 |

|             |             |             |             |             |
|-------------|-------------|-------------|-------------|-------------|
| 217133_x_at | -0.00675529 | -0.26159099 | 0.794554581 | 0.883173515 |
| 217134_at   | -0.06318767 | -1.4699249  | 0.146934069 | 0.289847166 |
| 217135_x_at | -0.04935498 | -1.83483673 | 0.071610127 | 0.168584059 |
| 217136_at   | 0.014311641 | 0.815955643 | 0.417831829 | 0.600287389 |
| 217137_x_at | -0.03156871 | -0.58099211 | 0.563475011 | 0.724206286 |
| 217138_x_at | 0.044412735 | 1.22918458  | 0.22391836  | 0.391095801 |
| 217139_at   | 0.000262647 | 0.008417502 | 0.993312492 | 0.997061131 |
| 217140_s_at | -0.68312751 | -4.76687363 | 1.28E-05    | 0.000130736 |
| 217141_at   | 0.047538892 | 1.406922402 | 0.164735122 | 0.315101309 |
| 217142_at   | -0.00699281 | -0.20490054 | 0.838360297 | 0.910715049 |
| 217143_s_at | 0.026896008 | 0.697024675 | 0.488544988 | 0.662984016 |
| 217144_at   | 0.047375607 | 0.880202386 | 0.382347335 | 0.565022813 |
| 217145_at   | -0.12601615 | -2.03404732 | 0.046484278 | 0.120482246 |
| 217146_at   | 0.025080998 | 0.632632373 | 0.529436082 | 0.696973619 |
| 217147_s_at | -0.01805095 | -0.62412178 | 0.534971259 | 0.701429781 |
| 217148_x_at | -0.04071312 | -0.79729896 | 0.428498093 | 0.609731176 |
| 217149_x_at | -0.07593249 | -1.91882981 | 0.059883572 | 0.14682448  |
| 217150_s_at | -0.07657337 | -1.05916247 | 0.293874637 | 0.472501117 |
| 217151_at   | -0.0050779  | -0.19743259 | 0.844172659 | 0.914372314 |
| 217152_at   | 0.215705305 | 3.519187108 | 0.000844498 | 0.004425695 |
| 217153_at   | 0.012466812 | 0.400760201 | 0.690054993 | 0.815461481 |
| 217154_s_at | -0.07388854 | -2.21841014 | 0.030416894 | 0.086015681 |
| 217155_at   | 0.02053719  | 0.992718475 | 0.324931061 | 0.5071078   |
| 217156_at   | -0.05352901 | -1.58305101 | 0.118795542 | 0.247667207 |
| 217157_x_at | -0.01511619 | -0.42835682 | 0.669962656 | 0.801315929 |
| 217158_at   | 0.073519423 | 1.595341236 | 0.116018625 | 0.243409276 |
| 217159_x_at | -0.01854635 | -0.3419815  | 0.733588972 | 0.844770893 |
| 217160_at   | -0.06355784 | -1.24795048 | 0.217015674 | 0.383149657 |
| 217161_x_at | 0.114435436 | 2.583289601 | 0.012303737 | 0.041303884 |
| 217162_at   | -0.03246884 | -0.59328476 | 0.555274939 | 0.717588051 |
| 217163_at   | 0.011483555 | 0.263748393 | 0.792899621 | 0.882157576 |
| 217164_at   | 0.145714948 | 3.11018717  | 0.002886887 | 0.012422564 |
| 217165_x_at | 0.768322405 | 5.900882701 | 1.93E-07    | 4.21E-06    |
| 217166_at   | 0.116298082 | 3.114643017 | 0.002849807 | 0.01230685  |
| 217167_x_at | 0.014844818 | 0.371577917 | 0.711548086 | 0.830438833 |
| 217168_s_at | 0.228145224 | 2.482002485 | 0.015953077 | 0.05119365  |
| 217169_at   | 0.039424151 | 1.220025743 | 0.227345171 | 0.394889286 |
| 217170_at   | 0.000533804 | 0.010202388 | 0.991894488 | 0.996241285 |
| 217171_at   | -0.00069432 | -0.01783409 | 0.98583183  | 0.993167574 |
| 217172_at   | 0.027359091 | 1.003855342 | 0.319578001 | 0.501125575 |
| 217173_s_at | 0.067387799 | 1.70123362  | 0.094203223 | 0.208092648 |
| 217174_s_at | 0.015667493 | 0.58417646  | 0.561345085 | 0.72275747  |
| 217175_at   | -0.02468631 | -0.5551927  | 0.580877339 | 0.737086836 |
| 217176_s_at | 0.017056358 | 0.840691545 | 0.403940026 | 0.586276315 |
| 217177_s_at | 0.052375281 | 2.163251552 | 0.034614907 | 0.095447273 |
| 217178_at   | 0.050997296 | 1.963101045 | 0.054389064 | 0.136276059 |
| 217179_x_at | 0.014303093 | 0.276509089 | 0.783130573 | 0.876043041 |
| 217180_at   | -0.00522921 | -0.17774066 | 0.859539988 | 0.923493548 |
| 217181_at   | 0.025824667 | 0.509236953 | 0.612499529 | 0.760997163 |
| 217182_at   | 0.033655582 | 0.614528928 | 0.541246024 | 0.706580891 |
| 217183_at   | 0.057135064 | 1.643639546 | 0.10560903  | 0.226819106 |
| 217184_s_at | -0.07994304 | -1.88485841 | 0.064413731 | 0.155510569 |
| 217185_s_at | -0.00391216 | -0.13301967 | 0.894633821 | 0.943774889 |
| 217186_at   | 0.015600257 | 0.570977848 | 0.570199204 | 0.728720126 |
| 217187_at   | -0.00178943 | -0.02502425 | 0.980120689 | 0.990022688 |
| 217188_s_at | -0.12369977 | -2.25008767 | 0.028214482 | 0.081054292 |
| 217189_s_at | -0.12300467 | -2.91046274 | 0.005096049 | 0.020016928 |
| 217190_x_at | 0.044469052 | 1.237292382 | 0.220916544 | 0.387792702 |
| 217191_x_at | -0.03764396 | -1.63916753 | 0.106539801 | 0.228225892 |
| 217192_s_at | -0.05673645 | -1.24179426 | 0.21926261  | 0.386102622 |
| 217193_x_at | 0.028522816 | 1.121380674 | 0.266702763 | 0.442018834 |
| 217194_at   | -0.00345032 | -0.23904103 | 0.811908295 | 0.894495677 |
| 217195_at   | -0.06932388 | -1.40876637 | 0.164191441 | 0.314370829 |
| 217196_s_at | -0.3848284  | -3.76032386 | 0.000394015 | 0.002341266 |
| 217197_x_at | -0.17218668 | -3.47457578 | 0.000969562 | 0.00496923  |
| 217198_x_at | 0.036928489 | 1.002491711 | 0.320230248 | 0.501989253 |
| 217199_s_at | 0.002039346 | 0.053360684 | 0.957626132 | 0.978305676 |
| 217200_x_at | -0.09809649 | -2.7484027  | 0.007948595 | 0.028930583 |
| 217201_at   | -0.00053691 | -0.02297425 | 0.981748908 | 0.990771643 |
| 217202_s_at | -0.31078891 | -2.65602481 | 0.010170271 | 0.035355456 |
| 217203_at   | -0.10147582 | -2.54793474 | 0.013481186 | 0.04451102  |
| 217204_at   | -0.00014129 | -0.00847784 | 0.993264554 | 0.997061131 |
| 217205_at   | 0.064861242 | 1.522525408 | 0.133259043 | 0.270083585 |
| 217206_at   | -0.01275123 | -0.56406739 | 0.574862079 | 0.732480422 |
| 217207_s_at | -0.0704911  | -1.1574882  | 0.251771878 | 0.424638268 |

|             |             |             |             |             |
|-------------|-------------|-------------|-------------|-------------|
| 217208_s_at | 0.154266275 | 1.699372648 | 0.094555259 | 0.20866269  |
| 217209_at   | -0.00037108 | -0.0098758  | 0.992153945 | 0.996389917 |
| 217210_at   | 0.013802673 | 0.463624409 | 0.644635368 | 0.784181493 |
| 217211_at   | -0.10082192 | -1.59291152 | 0.116563419 | 0.244254141 |
| 217212_s_at | 0.05856385  | 1.771437641 | 0.081690649 | 0.186595036 |
| 217213_at   | 0.013208728 | 0.728310827 | 0.469325473 | 0.646083291 |
| 217214_s_at | -0.06196735 | -1.67983183 | 0.098317434 | 0.214792139 |
| 217215_s_at | -0.09825267 | -2.48795245 | 0.015714289 | 0.050532667 |
| 217216_x_at | 0.069323668 | 1.820404624 | 0.07380796  | 0.172486161 |
| 217217_at   | -0.02262441 | -0.67100767 | 0.50485351  | 0.676752041 |
| 217218_at   | 0.015693212 | 0.432324331 | 0.66709341  | 0.799553172 |
| 217219_at   | -0.01101389 | -0.29955921 | 0.765573967 | 0.865327054 |
| 217220_at   | -0.01869031 | -0.99020989 | 0.326145055 | 0.508302232 |
| 217221_x_at | 0.13889572  | 2.869702862 | 0.005707029 | 0.02197076  |
| 217222_at   | 0.041906832 | 1.454916356 | 0.15103151  | 0.295762871 |
| 217223_s_at | -0.6428398  | -7.01064263 | 2.69E-09    | 1.78E-07    |
| 217224_at   | -0.07529933 | -1.6192868  | 0.110758645 | 0.235110923 |
| 217225_x_at | -0.35610647 | -5.68193223 | 4.42E-07    | 8.20E-06    |
| 217226_s_at | 0.008230748 | 0.18519732  | 0.853714144 | 0.919861446 |
| 217227_x_at | -0.00029698 | -0.00831093 | 0.993397157 | 0.997061131 |
| 217228_s_at | 0.023520086 | 0.642605399 | 0.522987977 | 0.691724732 |
| 217229_at   | -0.02683513 | -1.10662615 | 0.272980374 | 0.448964512 |
| 217230_at   | 0.002368074 | 0.070989198 | 0.943648211 | 0.970855038 |
| 217231_s_at | -0.05556586 | -0.99014828 | 0.326174909 | 0.508313308 |
| 217232_x_at | -0.2465882  | -1.04582852 | 0.299937521 | 0.479256621 |
| 217233_at   | -0.01235089 | -0.23426551 | 0.815595893 | 0.896738134 |
| 217234_s_at | 0.222811726 | 1.838276258 | 0.071094523 | 0.167618536 |
| 217235_x_at | -0.01359235 | -0.43827647 | 0.662798273 | 0.796434286 |
| 217236_x_at | 0.063772273 | 1.77386393  | 0.081284191 | 0.185951733 |
| 217237_at   | 0.023093888 | 1.068961707 | 0.289473073 | 0.467725937 |
| 217238_s_at | 0.011099516 | 0.284344664 | 0.777149213 | 0.872311137 |
| 217239_x_at | -0.01650169 | -0.49695273 | 0.621082808 | 0.767280677 |
| 217240_at   | -0.05823857 | -0.90847222 | 0.367352077 | 0.550559994 |
| 217242_at   | -0.07078776 | -2.3084196  | 0.024525159 | 0.072616827 |
| 217244_at   | 0.01982676  | 0.575645246 | 0.567060345 | 0.726874946 |
| 217245_at   | -0.05383874 | -1.04906846 | 0.298456524 | 0.477658693 |
| 217246_s_at | -0.185757   | -4.67246697 | 1.79E-05    | 0.000173579 |
| 217247_at   | -0.01383312 | -0.69275233 | 0.491202932 | 0.665413025 |
| 217248_s_at | -0.08245144 | -2.0235389  | 0.047588641 | 0.122711259 |
| 217249_x_at | -0.27791801 | -6.21429063 | 5.83E-08    | 1.66E-06    |
| 217250_s_at | -0.12360667 | -2.27161558 | 0.026799334 | 0.077834406 |
| 217251_x_at | 0.012284766 | 0.346141942 | 0.730476483 | 0.842815412 |
| 217252_at   | 0.02922574  | -0.84518241 | 0.401448681 | 0.583770398 |
| 217253_at   | 0.030652993 | 1.087275061 | 0.281369787 | 0.458639526 |
| 217254_s_at | -0.05850668 | -1.17909355 | 0.243128884 | 0.413908125 |
| 217255_at   | -0.00361481 | -0.06872654 | 0.945441404 | 0.971908497 |
| 217256_x_at | -0.00172209 | -0.05609731 | 0.955455232 | 0.977144284 |
| 217257_at   | 0.03875986  | 1.343905857 | 0.184162176 | 0.341358441 |
| 217258_x_at | -0.00607984 | -0.14700877 | 0.883629999 | 0.937810304 |
| 217259_at   | -0.03399566 | -0.68950696 | 0.493227274 | 0.666948453 |
| 217260_x_at | 0.010476978 | 0.284166493 | 0.777285073 | 0.872311137 |
| 217261_at   | 0.003242951 | 0.073335631 | 0.941788933 | 0.969842382 |
| 217262_s_at | -0.00710881 | -0.27060632 | 0.787645225 | 0.878762655 |
| 217263_x_at | 0.008789874 | 0.288414351 | 0.774047892 | 0.870699162 |
| 217264_s_at | -0.04794273 | -0.69560932 | 0.489424635 | 0.663768309 |
| 217265_at   | 0.004974489 | 0.184561557 | 0.854210547 | 0.920223154 |
| 217266_at   | -0.07139018 | -2.07169296 | 0.042707722 | 0.112630862 |
| 217267_s_at | -0.03356412 | -1.05799614 | 0.294401576 | 0.47306638  |
| 217268_at   | 0.017646721 | 1.079472699 | 0.284802667 | 0.462413747 |
| 217269_s_at | -0.02562066 | -0.66455362 | 0.508944281 | 0.680032821 |
| 217270_s_at | -0.16484368 | -4.75349666 | 1.34E-05    | 0.000136139 |
| 217271_at   | -0.03105345 | -0.88893507 | 0.377674639 | 0.560262719 |
| 217272_s_at | -0.00474485 | -0.12668997 | 0.899619739 | 0.946244733 |
| 217273_at   | 0.02355086  | 0.559204813 | 0.578154189 | 0.735069845 |
| 217274_x_at | 0.028331927 | 0.848924846 | 0.39937978  | 0.581687506 |
| 217275_at   | 0.032710542 | 0.759427066 | 0.450643122 | 0.630048877 |
| 217276_x_at | 0.132361605 | 4.25109368  | 7.74E-05    | 0.000594913 |
| 217277_at   | -0.01187869 | -0.35997582 | 0.720160117 | 0.836158058 |
| 217278_x_at | -0.03408331 | -0.80180575 | 0.425906722 | 0.607339371 |
| 217279_x_at | -0.00879733 | -0.18942592 | 0.850413979 | 0.917881072 |
| 217280_x_at | -0.50143415 | -6.5797772  | 1.43E-08    | 5.82E-07    |
| 217281_x_at | -0.03173219 | -0.90427271 | 0.369555562 | 0.55276874  |
| 217282_at   | -0.01305412 | -0.55016549 | 0.584298137 | 0.739883616 |
| 217283_at   | -0.00542232 | -0.10714797 | 0.915037799 | 0.954807244 |
| 217284_x_at | 0.145080735 | 4.59584459  | 2.34E-05    | 0.000218154 |

|             |              |             |             |             |
|-------------|--------------|-------------|-------------|-------------|
| 217285_at   | 0.055153641  | 1.376247874 | 0.173984479 | 0.327897699 |
| 217286_s_at | -0.33608889  | -5.00384788 | 5.44E-06    | 6.45E-05    |
| 217287_s_at | -0.01866572  | -0.55600382 | 0.580326308 | 0.736797425 |
| 217288_at   | -0.03259273  | -0.9681694  | 0.336941075 | 0.519719625 |
| 217289_s_at | -0.051423    | -1.93955894 | 0.057254681 | 0.141833945 |
| 217290_at   | -0.01022845  | -0.33431252 | 0.739337992 | 0.848899322 |
| 217291_at   | 0.025054809  | 0.925945264 | 0.358274353 | 0.541329909 |
| 217292_at   | -0.0213419   | -0.59098984 | 0.556801264 | 0.71890691  |
| 217293_at   | -0.06143934  | -1.07831277 | 0.285315484 | 0.463086833 |
| 217294_s_at | -0.40426515  | -2.84777668 | 0.006063074 | 0.023100673 |
| 217295_at   | -0.03546671  | -0.95116638 | 0.345428887 | 0.528424022 |
| 217296_at   | 0.034235032  | 0.968685432 | 0.336685644 | 0.519454197 |
| 217297_s_at | 0.167337867  | 3.582425373 | 0.000693239 | 0.003767108 |
| 217298_at   | 0.059726912  | 1.489484127 | 0.141725737 | 0.282500971 |
| 217299_s_at | 0.017106644  | 0.41182362  | 0.681972081 | 0.809849774 |
| 217300_at   | 0.020187928  | 0.805093781 | 0.42402206  | 0.605559977 |
| 217301_x_at | -0.09352368  | -1.33944947 | 0.185599306 | 0.343327987 |
| 217302_at   | -0.04306098  | -1.44475773 | 0.153855201 | 0.299612054 |
| 217303_s_at | 0.003407419  | 0.112144846 | 0.911092048 | 0.952978153 |
| 217304_at   | 0.061071634  | 1.938239214 | 0.057419067 | 0.142115131 |
| 217305_s_at | 0.033741756  | 1.209680405 | 0.231261854 | 0.399518933 |
| 217306_at   | 0.015039658  | 0.853866168 | 0.396658207 | 0.579135826 |
| 217307_at   | -0.13199184  | -3.12857294 | 0.002736745 | 0.011889824 |
| 217308_at   | -0.00540041  | -0.16157351 | 0.872197831 | 0.931072122 |
| 217309_s_at | -0.05118287  | -1.41867516 | 0.161293624 | 0.31015122  |
| 217310_s_at | -0.07343171  | -2.08648325 | 0.041298455 | 0.109622294 |
| 217311_at   | -0.03488758  | -0.65545164 | 0.514743537 | 0.685179989 |
| 217312_s_at | 0.058765159  | 1.61001019  | 0.112773004 | 0.238310856 |
| 217313_at   | 0.052779508  | 1.909017315 | 0.06116339  | 0.149274478 |
| 217314_at   | -0.00440511  | -0.1062567  | 0.915741811 | 0.955196121 |
| 217315_s_at | -0.04366847  | -0.6633896  | 0.509683965 | 0.680614191 |
| 217316_at   | -0.00980495  | -0.29797899 | 0.766773752 | 0.866133866 |
| 217317_s_at | 0.318298261  | 2.718986052 | 0.008602352 | 0.030882507 |
| 217318_x_at | -0.07371584  | -1.14407774 | 0.257245947 | 0.43096227  |
| 217319_x_at | -0.01750983  | -0.5540746  | 0.581637326 | 0.737705689 |
| 217320_at   | 0.001548359  | 0.037024336 | 0.970591514 | 0.985139806 |
| 217321_x_at | 0.028759361  | 1.98066351  | 0.052332051 | 0.132214198 |
| 217322_x_at | 0.0611140745 | 1.204718573 | 0.233157727 | 0.40183114  |
| 217323_at   | -0.01240847  | -0.33390536 | 0.73964364  | 0.848943283 |
| 217324_at   | -0.00595981  | -0.11318471 | 0.910271209 | 0.95269175  |
| 217325_at   | 0.014863036  | 0.358063779 | 0.72158293  | 0.837285441 |
| 217326_x_at | 0.003589779  | 0.086964864 | 0.930996096 | 0.964096179 |
| 217327_at   | -0.04793379  | -1.89949084 | 0.062428059 | 0.151739534 |
| 217328_at   | -0.0075283   | -0.22698551 | 0.821225465 | 0.900602141 |
| 217329_x_at | -0.11909243  | -3.35341506 | 0.001403988 | 0.006780529 |
| 217330_at   | 0.002860528  | 0.069894223 | 0.944515961 | 0.971425124 |
| 217331_at   | -0.00208345  | -0.05965381 | 0.952634451 | 0.975747583 |
| 217332_at   | -0.02692768  | -0.84731885 | 0.400266801 | 0.58271357  |
| 217333_at   | -0.01300951  | -0.52130498 | 0.604120087 | 0.754677295 |
| 217334_at   | -0.00867422  | -0.21780746 | 0.828336228 | 0.904670039 |
| 217335_at   | 0.034322866  | 0.838497613 | 0.405160572 | 0.587541331 |
| 217336_at   | -0.11640023  | -2.27602828 | 0.02651715  | 0.077230659 |
| 217337_at   | -0.04974205  | -1.81573016 | 0.074531843 | 0.173778023 |
| 217338_at   | -0.00297988  | -0.07660661 | 0.939197604 | 0.968323538 |
| 217339_x_at | 0.003245313  | 0.110238911 | 0.912596797 | 0.953749891 |
| 217340_at   | -0.00818197  | -0.34384573 | 0.732193757 | 0.843685953 |
| 217341_at   | -0.05690587  | -1.25028851 | 0.216166793 | 0.382172013 |
| 217342_x_at | 0.159814133  | 3.497545392 | 0.000903121 | 0.004683486 |
| 217343_at   | -0.01685764  | -0.8299214  | 0.409953417 | 0.592166714 |
| 217344_at   | 0.022285504  | 0.98114948  | 0.330554863 | 0.51301385  |
| 217345_at   | 0.008669141  | 0.376388762 | 0.707988049 | 0.827967924 |
| 217346_at   | -0.03599666  | -1.28477882 | 0.203927899 | 0.366935568 |
| 217347_at   | 0.054519285  | 1.684422396 | 0.097422771 | 0.213327707 |
| 217348_x_at | -0.00156689  | -0.02937234 | 0.976667496 | 0.988299228 |
| 217349_s_at | 0.025167532  | 0.699211266 | 0.487187733 | 0.661620626 |
| 217350_at   | -0.0006352   | -0.01813483 | 0.985592931 | 0.99310365  |
| 217351_at   | -0.00154952  | -0.03184066 | 0.974707384 | 0.987265038 |
| 217352_at   | 0.008496366  | 0.226328655 | 0.821733875 | 0.900899799 |
| 217353_at   | 0.005010227  | 0.21848765  | 0.827808744 | 0.904419762 |
| 217354_s_at | 0.009567481  | 0.364435643 | 0.716845287 | 0.834173034 |
| 217355_at   | -0.01930402  | -0.9647485  | 0.338637624 | 0.521336296 |
| 217356_s_at | -0.52440209  | -4.33338292 | 5.84E-05    | 0.000469047 |
| 217357_at   | -0.04708537  | -0.94495192 | 0.348565705 | 0.531638017 |
| 217358_at   | 0.005879184  | 0.145690449 | 0.884666042 | 0.9383907   |
| 217359_s_at | -0.14568864  | -1.27882489 | 0.206002903 | 0.369360577 |

|             |             |             |             |             |
|-------------|-------------|-------------|-------------|-------------|
| 217360_x_at | -0.03512193 | -0.89987185 | 0.371873727 | 0.555065814 |
| 217361_at   | -0.00089688 | -0.03393863 | 0.973041494 | 0.986372039 |
| 217362_x_at | 0.161038142 | 3.365747193 | 0.001352511 | 0.006564556 |
| 217363_x_at | 0.002340571 | 0.07554265  | 0.940040422 | 0.968605305 |
| 217364_x_at | -0.02569112 | -0.94510786 | 0.348486766 | 0.531571668 |
| 217365_at   | -0.07419423 | -1.6226985  | 0.110025185 | 0.23396515  |
| 217366_at   | 0.024315163 | 0.951450603 | 0.345285864 | 0.528259477 |
| 217367_s_at | 0.394080265 | 5.213664142 | 2.53E-06    | 3.43E-05    |
| 217368_at   | 0.044769082 | 1.231246767 | 0.223152038 | 0.390315489 |
| 217369_at   | -0.04059466 | -0.90369204 | 0.369860906 | 0.553029316 |
| 217370_x_at | -0.13464788 | -2.25740962 | 0.027725925 | 0.079881836 |
| 217371_s_at | 0.062867562 | 3.439879727 | 0.00107879  | 0.005425145 |
| 217372_at   | -0.00046898 | -0.01558334 | 0.98761976  | 0.994047751 |
| 217373_x_at | -0.00410282 | -0.15192803 | 0.879765863 | 0.935519616 |
| 217374_x_at | 0.001810654 | 0.037496    | 0.970217048 | 0.984948899 |
| 217375_at   | 0.0151202   | 0.52065733  | 0.604568438 | 0.754857592 |
| 217376_at   | -0.02781205 | -0.45575849 | 0.650249063 | 0.788101618 |
| 217377_x_at | -0.24187304 | -5.72332281 | 3.78E-07    | 7.22E-06    |
| 217378_x_at | -0.08924528 | -1.94207782 | 0.056942044 | 0.14122192  |
| 217379_at   | 0.017478924 | 0.435964342 | 0.66446539  | 0.797686882 |
| 217380_s_at | 0.045893452 | 1.401756172 | 0.166265753 | 0.317363501 |
| 217381_s_at | 0.002120069 | 0.041633148 | 0.966932759 | 0.983234941 |
| 217382_at   | 0.024248236 | 0.806512732 | 0.423210282 | 0.604961265 |
| 217383_at   | -0.05013461 | -1.54761467 | 0.127102238 | 0.260846453 |
| 217384_x_at | -0.01310021 | -0.42472826 | 0.672591111 | 0.803002619 |
| 217385_at   | -0.04858452 | -1.16024411 | 0.250657328 | 0.423306276 |
| 217386_at   | -0.023009   | -0.78897019 | 0.433311759 | 0.614136592 |
| 217387_at   | -0.0512165  | -1.12108217 | 0.266828748 | 0.442060471 |
| 217388_s_at | -0.01757533 | -0.58689495 | 0.559529931 | 0.721168325 |
| 217389_s_at | -0.026627   | -0.53790103 | 0.592683666 | 0.746125979 |
| 217390_x_at | 0.001720605 | 0.063833591 | 0.949320107 | 0.974035067 |
| 217391_x_at | 0.06650524  | 1.430471835 | 0.157895541 | 0.305285206 |
| 217392_at   | 0.005395114 | 0.290366633 | 0.772561457 | 0.869852744 |
| 217393_x_at | -0.03749099 | -1.20265925 | 0.233947887 | 0.402789081 |
| 217394_at   | 0.004233611 | 0.229600149 | 0.81920248  | 0.899243435 |
| 217395_at   | 0.134254696 | 3.370559836 | 0.001332911 | 0.00648845  |
| 217396_at   | -0.05695831 | -0.96712435 | 0.337458756 | 0.520244263 |
| 217397_at   | -0.01838178 | -0.4473696  | 0.656258491 | 0.792004334 |
| 217398_x_at | -0.22652562 | -4.92761133 | 7.18E-06    | 8.14E-05    |
| 217399_s_at | -0.03513926 | -1.01902475 | 0.312382374 | 0.493356176 |
| 217400_at   | -0.00853903 | -0.52745181 | 0.59987242  | 0.751513656 |
| 217401_at   | 0.006006911 | 0.278990587 | 0.781234856 | 0.874989828 |
| 217402_at   | -0.0052024  | -0.34887982 | 0.728430713 | 0.841506885 |
| 217403_s_at | 0.02738347  | 0.898393797 | 0.372654363 | 0.55576697  |
| 217404_s_at | 0.016846762 | 0.548896624 | 0.585163061 | 0.740559198 |
| 217405_x_at | 0.014700655 | 0.425918736 | 0.671728302 | 0.80235713  |
| 217406_at   | -0.02011186 | -0.51428261 | 0.608989657 | 0.758322859 |
| 217407_x_at | 0.105058588 | 3.630786667 | 0.000595374 | 0.003315532 |
| 217408_at   | 0.151033517 | 2.530089182 | 0.014113494 | 0.046175716 |
| 217409_at   | -0.03236628 | -0.92521711 | 0.358649734 | 0.541713945 |
| 217410_at   | -0.06205951 | -1.12542658 | 0.264999287 | 0.439978755 |
| 217411_s_at | 0.041857807 | 1.166335286 | 0.248206472 | 0.420406414 |
| 217412_at   | -0.00483517 | -0.13035481 | 0.896732431 | 0.944627488 |
| 217413_s_at | 0.01671098  | 0.406044569 | 0.686189648 | 0.81254803  |
| 217414_x_at | 0.007148602 | 0.031493944 | 0.974982706 | 0.98731299  |
| 217415_at   | -0.02931948 | -0.90084618 | 0.371359699 | 0.554557861 |
| 217416_x_at | -0.06168606 | -2.37963134 | 0.020606658 | 0.063057362 |
| 217417_at   | -0.03560441 | -1.2776081  | 0.206428898 | 0.369916612 |
| 217418_x_at | 0.03704855  | 0.600186471 | 0.550697363 | 0.713570686 |
| 217419_x_at | 0.006111695 | 0.111573031 | 0.911543465 | 0.953154238 |
| 217420_s_at | 0.029329931 | 1.361617369 | 0.178533895 | 0.334126795 |
| 217421_at   | 0.029173283 | 0.511142061 | 0.611173217 | 0.760067713 |
| 217422_s_at | 0.150136342 | 1.964704086 | 0.05419848  | 0.135889996 |
| 217423_at   | -0.02517492 | -0.51657472 | 0.607398253 | 0.757062828 |
| 217424_at   | 0.049536954 | 1.128112037 | 0.263872865 | 0.438678945 |
| 217425_at   | -0.06020398 | -1.43733701 | 0.155943756 | 0.302506113 |
| 217426_at   | -0.00022865 | -0.0105529  | 0.991616022 | 0.996118302 |
| 217427_s_at | -0.02377023 | -0.20611719 | 0.837414216 | 0.910318149 |
| 217428_s_at | -0.01626442 | -0.77419045 | 0.441932356 | 0.622269717 |
| 217429_at   | 0.020502974 | 0.623034753 | 0.5356804   | 0.702024379 |
| 217430_x_at | -0.03967576 | -0.87141365 | 0.387086563 | 0.569761639 |
| 217431_x_at | -0.01655965 | -0.5423339  | 0.589646269 | 0.743999748 |
| 217432_s_at | -0.31549071 | -6.83146574 | 5.39E-09    | 2.92E-07    |
| 217433_at   | 0.008341714 | 0.173286133 | 0.863024048 | 0.925568026 |
| 217434_at   | -0.04009042 | -1.09970523 | 0.275960464 | 0.452386311 |



|             |             |             |             |             |
|-------------|-------------|-------------|-------------|-------------|
| 217435_x_at | 0.013212013 | 0.284165629 | 0.777285731 | 0.872311137 |
| 217436_x_at | 0.197234201 | 4.106196593 | 0.000126418 | 0.000899665 |
| 217437_s_at | 0.05845761  | 1.654200892 | 0.103437129 | 0.22332426  |
| 217438_at   | -0.10644057 | -2.5082156  | 0.014925077 | 0.048388214 |
| 217439_at   | -0.00064027 | -0.01656059 | 0.986843456 | 0.993579664 |
| 217440_at   | -0.00836413 | -0.56406176 | 0.574865891 | 0.732480422 |
| 217441_at   | -0.04011497 | -0.89813325 | 0.372792078 | 0.555910357 |
| 217442_at   | -0.04950602 | -0.93407617 | 0.354099896 | 0.537264681 |
| 217443_at   | -0.04044094 | -1.34935061 | 0.1824178   | 0.339268261 |
| 217444_at   | 0.070168681 | 1.953873283 | 0.055497334 | 0.138462951 |
| 217445_s_at | 0.028065385 | 1.756279829 | 0.084268377 | 0.191134911 |
| 217446_x_at | 0.243016624 | 4.129495994 | 0.000116901 | 0.000840902 |
| 217447_at   | 0.013908881 | 0.486612639 | 0.628348972 | 0.772719505 |
| 217448_s_at | -0.11193669 | -3.67348348 | 0.000520063 | 0.002961603 |
| 217449_at   | 8.55E-05    | 0.00232359  | 0.998153942 | 0.999092855 |
| 217450_at   | 0.032844004 | 1.098689034 | 0.276399941 | 0.452817674 |
| 217451_at   | -0.00226927 | -0.09449314 | 0.92503998  | 0.960702427 |
| 217452_s_at | -0.14070776 | -4.62912397 | 2.08E-05    | 0.000197998 |
| 217453_at   | -0.00552817 | -0.11424262 | 0.909436216 | 0.952174562 |
| 217454_at   | -0.00523644 | -0.17463604 | 0.86196794  | 0.924857061 |
| 217455_s_at | -0.11613429 | -2.56798636 | 0.012801427 | 0.04266356  |
| 217456_x_at | 0.192950613 | 2.82226471  | 0.006503125 | 0.024487123 |
| 217457_s_at | -0.30018876 | -3.51429229 | 0.000857432 | 0.004482436 |
| 217458_at   | -0.00898928 | -0.1669766  | 0.867963648 | 0.928444781 |
| 217459_at   | -0.02611128 | -0.51045212 | 0.611653394 | 0.760365355 |
| 217460_at   | -0.02723373 | -1.09895737 | 0.276283848 | 0.452677264 |
| 217461_x_at | -0.00164849 | -0.07074502 | 0.943841716 | 0.970999815 |
| 217462_at   | 0.015745389 | 0.361089628 | 0.719331754 | 0.835760795 |
| 217463_s_at | -0.08632087 | -1.22379495 | 0.225930293 | 0.393427657 |
| 217464_at   | 0.041368396 | 0.984193761 | 0.32906878  | 0.511467688 |
| 217465_at   | -0.11736211 | -2.94540246 | 0.004621178 | 0.018484711 |
| 217466_x_at | -0.02227534 | -0.42181554 | 0.674704002 | 0.804513843 |
| 217467_at   | -0.00170558 | -0.08022922 | 0.936328481 | 0.966929911 |
| 217468_at   | 0.029713474 | 0.4700664   | 0.640053305 | 0.781180357 |
| 217469_at   | 0.010670124 | 0.306257631 | 0.760494597 | 0.862124164 |
| 217470_at   | -0.05264287 | -1.04398557 | 0.300782185 | 0.480262858 |
| 217471_at   | 0.020794145 | 0.614039233 | 0.541567346 | 0.706728823 |
| 217472_at   | 0.037307114 | 0.864377948 | 0.390906858 | 0.573719432 |
| 217473_x_at | -0.02427411 | -0.69902341 | 0.487304255 | 0.661702116 |
| 217474_at   | 0.011675677 | 0.312552257 | 0.755731054 | 0.859588429 |
| 217475_s_at | 0.113834002 | 2.898417867 | 0.005269974 | 0.020580713 |
| 217476_at   | -0.00968618 | -0.22442273 | 0.82320951  | 0.901778449 |
| 217477_at   | -0.0475366  | -1.15553442 | 0.252564175 | 0.425497516 |
| 217478_s_at | 0.396950366 | 3.192674473 | 0.002268578 | 0.010133664 |
| 217479_at   | 0.003461949 | 0.150476046 | 0.880906111 | 0.936297943 |
| 217480_x_at | 0.046522139 | 0.9800655   | 0.331085087 | 0.513642312 |
| 217481_x_at | 0.027911377 | 1.00042955  | 0.321218309 | 0.503090563 |
| 217482_at   | 0.219136528 | 3.948610124 | 0.000213478 | 0.001392605 |
| 217483_at   | -0.03152694 | -0.72603371 | 0.470709712 | 0.647251199 |
| 217484_at   | 0.010866836 | 0.281296364 | 0.779474574 | 0.87386881  |
| 217485_x_at | -0.12347369 | -3.00617361 | 0.003891852 | 0.016032719 |
| 217486_s_at | 0.00687866  | 0.145429394 | 0.884871224 | 0.9383907   |
| 217487_x_at | -0.01512606 | -0.13267891 | 0.894902134 | 0.9437972   |
| 217488_x_at | 0.020602528 | 0.520589102 | 0.60461568  | 0.754874398 |
| 217489_s_at | 0.015413703 | 0.484393933 | 0.629912955 | 0.773897511 |
| 217490_at   | 0.007787715 | 0.199790853 | 0.842336246 | 0.913388633 |
| 217491_x_at | -0.22133211 | -3.88971748 | 0.000258994 | 0.001641999 |
| 217492_s_at | 0.09188612  | 1.592038083 | 0.116759765 | 0.244589088 |
| 217493_x_at | 0.011436742 | 0.275235447 | 0.784104074 | 0.87675897  |
| 217494_s_at | -0.02044237 | -0.7760294  | 0.44085429  | 0.621201877 |
| 217495_x_at | -0.00701041 | -0.18412806 | 0.854549059 | 0.920482273 |
| 217496_s_at | 0.015160569 | 0.449820491 | 0.654500399 | 0.79062983  |
| 217497_at   | 0.066224913 | 2.411136047 | 0.019059269 | 0.059289025 |
| 217498_at   | -0.04361172 | -0.90257563 | 0.370448413 | 0.553696547 |
| 217499_x_at | 0.233559785 | 5.049890897 | 4.60E-06    | 5.65E-05    |
| 217500_at   | 0.026846529 | 0.918853316 | 0.361941224 | 0.545156282 |
| 217501_at   | -0.02054761 | -0.68180206 | 0.498051621 | 0.671096329 |
| 217502_at   | -0.04680931 | -1.01376041 | 0.314867016 | 0.496175617 |
| 217503_at   | -0.01601539 | -0.62382449 | 0.535165157 | 0.701581097 |
| 217504_at   | 0.155128952 | 2.288991609 | 0.025703338 | 0.075351496 |
| 217505_at   | 0.003759683 | 0.305439042 | 0.761114765 | 0.862500581 |
| 217506_at   | -0.03261457 | -0.37895572 | 0.706091161 | 0.826778492 |
| 217507_at   | 0.054406527 | 1.649928256 | 0.104311355 | 0.224836173 |
| 217508_s_at | 0.020140286 | 0.471372118 | 0.63912628  | 0.78062306  |
| 217509_x_at | -0.04146981 | -0.80062513 | 0.42658466  | 0.607836828 |

|             |             |             |             |             |
|-------------|-------------|-------------|-------------|-------------|
| 217510_at   | -0.0109995  | -0.2878404  | 0.774485051 | 0.870961702 |
| 217511_at   | 0.039746604 | 0.89900011  | 0.372334011 | 0.555496916 |
| 217512_at   | -0.04116172 | -1.28058895 | 0.205386475 | 0.368595445 |
| 217513_at   | 0.05742721  | 1.796251456 | 0.077612641 | 0.179342545 |
| 217514_at   | -0.02719269 | -0.63067521 | 0.530706343 | 0.697864709 |
| 217515_s_at | 0.010215703 | 0.267324325 | 0.7901586   | 0.880523835 |
| 217516_x_at | 0.025590215 | 0.507792682 | 0.613505883 | 0.76176043  |
| 217517_x_at | -0.03648799 | -1.41840069 | 0.161373357 | 0.310249667 |
| 217518_at   | 0.184363247 | 5.360724049 | 1.47E-06    | 2.19E-05    |
| 217519_at   | 0.012989782 | 0.605451704 | 0.547218038 | 0.710772863 |
| 217520_x_at | 0.006692217 | 0.169060104 | 0.866331923 | 0.92769803  |
| 217521_at   | 0.014991342 | 0.337687477 | 0.736806106 | 0.847100519 |
| 217522_at   | -0.06576122 | -1.83193513 | 0.072047533 | 0.169413492 |
| 217523_at   | 0.38830865  | 2.963586675 | 0.004390617 | 0.017722674 |
| 217524_x_at | -0.0334704  | -1.49448803 | 0.140416916 | 0.280632896 |
| 217525_at   | 0.058889544 | 2.139039446 | 0.036612606 | 0.099737327 |
| 217526_at   | 0.145068868 | 2.909381148 | 0.005111446 | 0.020066601 |
| 217527_s_at | 0.145834682 | 3.206821128 | 0.002175931 | 0.009786327 |
| 217528_at   | 0.002184719 | 0.105321562 | 0.91648055  | 0.955676454 |
| 217529_at   | -0.07662486 | -1.80297397 | 0.076537578 | 0.177344331 |
| 217530_at   | -0.03349344 | -0.65326881 | 0.516139527 | 0.686123045 |
| 217531_at   | -0.00515669 | -0.22612919 | 0.821888278 | 0.900996637 |
| 217532_x_at | -0.04372279 | -1.13263285 | 0.261984259 | 0.436467674 |
| 217533_x_at | -0.06710904 | -2.33361282 | 0.023068952 | 0.069124882 |
| 217534_at   | -0.05548951 | -1.28467652 | 0.203963419 | 0.366984318 |
| 217535_at   | -0.01175793 | -0.40886311 | 0.684131409 | 0.811099346 |
| 217536_x_at | 0.232718673 | 4.758157465 | 1.32E-05    | 0.000134314 |
| 217537_x_at | -0.06363863 | -1.67916224 | 0.098448493 | 0.214994383 |
| 217538_at   | -0.03904392 | -0.89354688 | 0.375221573 | 0.558311435 |
| 217539_at   | -0.01335771 | -0.52432268 | 0.602033019 | 0.753122647 |
| 217540_at   | -0.05274567 | -0.76235613 | 0.448907011 | 0.628368584 |
| 217541_x_at | -0.04881829 | -1.89970499 | 0.062399388 | 0.151678094 |
| 217542_at   | 0.020541895 | 0.759355133 | 0.450685807 | 0.630088844 |
| 217543_s_at | -0.28493379 | -6.82256796 | 5.58E-09    | 2.97E-07    |
| 217544_at   | -0.00731679 | -0.2096268  | 0.834686468 | 0.908851447 |
| 217545_at   | 0.009759398 | 0.149685817 | 0.881526788 | 0.93663495  |
| 217546_at   | 0.681305833 | 3.028640294 | 0.003650506 | 0.015165313 |
| 217547_x_at | -0.03755816 | -2.08479389 | 0.041457352 | 0.109965694 |
| 217548_at   | 0.032022524 | 0.575863327 | 0.566913891 | 0.726828527 |
| 217549_at   | 0.070158093 | 1.242956604 | 0.218837063 | 0.385596357 |
| 217550_at   | 0.092140246 | 1.45243155  | 0.151718416 | 0.296653081 |
| 217551_at   | 0.162068462 | 2.382855706 | 0.020443282 | 0.062673287 |
| 217552_x_at | 0.017319815 | 0.749673819 | 0.456452091 | 0.635407471 |
| 217553_at   | -0.01424725 | -0.42300857 | 0.673838261 | 0.803916394 |
| 217554_at   | -0.00560746 | -0.11855191 | 0.906036052 | 0.950195078 |
| 217555_at   | -0.04890334 | -1.23283953 | 0.222561475 | 0.389655191 |
| 217556_at   | -0.21393618 | -3.82939066 | 0.000315231 | 0.001940537 |
| 217557_s_at | -0.01039524 | -0.3798438  | 0.705435341 | 0.826382434 |
| 217558_at   | -0.00418557 | -0.12292395 | 0.902588183 | 0.948269055 |
| 217559_at   | 0.047806929 | 1.590775239 | 0.117044119 | 0.245066094 |
| 217560_at   | 0.054036478 | 1.400866262 | 0.166530516 | 0.317733171 |
| 217561_at   | 0.002646129 | 0.090112361 | 0.928505403 | 0.962658266 |
| 217562_at   | -0.00825747 | -0.24609531 | 0.806468913 | 0.891049947 |
| 217563_at   | 0.016701192 | 0.446061209 | 0.657197841 | 0.792571698 |
| 217564_s_at | 0.036311347 | 1.065382396 | 0.291075499 | 0.46947729  |
| 217565_at   | -0.34303033 | -4.39712374 | 4.69E-05    | 0.000390035 |
| 217566_s_at | 0.004015473 | 0.138138087 | 0.890605146 | 0.941457145 |
| 217567_at   | -0.04709442 | -1.14417653 | 0.257205316 | 0.43096227  |
| 217568_at   | -0.01724339 | -0.32349606 | 0.747471914 | 0.854331341 |
| 217569_x_at | -0.07767047 | -1.46158244 | 0.149200726 | 0.293075203 |
| 217570_x_at | 0.006353058 | 0.168883555 | 0.866470167 | 0.927794449 |
| 217571_at   | 0.023194773 | 1.048428276 | 0.298748757 | 0.477924685 |
| 217572_at   | -0.03108779 | -0.8357529  | 0.406690715 | 0.589076376 |
| 217573_at   | 0.052180958 | 1.296082248 | 0.200031537 | 0.361847707 |
| 217574_at   | -0.2557862  | -4.40439452 | 4.57E-05    | 0.000382125 |
| 217575_s_at | 0.032936506 | 1.189596683 | 0.239005342 | 0.408709652 |
| 217576_x_at | -0.09736613 | -2.9126798  | 0.00506462  | 0.019921494 |
| 217577_at   | 0.017860152 | 0.732645188 | 0.466697038 | 0.644171347 |
| 217578_at   | 0.01457758  | 0.801901931 | 0.425851521 | 0.60728003  |
| 217579_x_at | 0.119991113 | 3.858688667 | 0.000286593 | 0.001791888 |
| 217580_x_at | -0.11014202 | -2.71133642 | 0.008780254 | 0.031369982 |
| 217581_at   | -0.00854836 | -0.21317694 | 0.831929283 | 0.907148838 |
| 217582_at   | -0.01970092 | -1.03889357 | 0.303124404 | 0.482861312 |
| 217583_at   | -0.00927536 | -0.33311847 | 0.740234464 | 0.849294701 |
| 217584_at   | 0.042890921 | 1.201067454 | 0.234559991 | 0.4034078   |

|             |             |             |             |             |
|-------------|-------------|-------------|-------------|-------------|
| 217585_at   | 0.194603821 | 2.835403419 | 0.006272944 | 0.023770598 |
| 217586_x_at | 0.320686816 | 5.609191075 | 5.81E-07    | 1.02E-05    |
| 217587_at   | -0.01756775 | -0.49564438 | 0.622000133 | 0.767742762 |
| 217588_at   | -0.09592836 | -2.7225977  | 0.008519513 | 0.030639259 |
| 217589_at   | 0.006834399 | 0.349462816 | 0.727995351 | 0.841255804 |
| 217590_s_at | -0.02101533 | -0.71080014 | 0.480029309 | 0.655407994 |
| 217591_at   | 0.04349545  | 1.038063573 | 0.30350736  | 0.483319114 |
| 217592_at   | 0.047703597 | 1.040770209 | 0.302259743 | 0.481898988 |
| 217593_at   | 0.213034611 | 3.19355923  | 0.002262677 | 0.010112357 |
| 217594_at   | 0.014724714 | 0.74121649  | 0.461523995 | 0.639763319 |
| 217595_at   | -0.05643903 | -2.51269991 | 0.014755336 | 0.047917851 |
| 217596_at   | -0.00143461 | -0.04234541 | 0.966367381 | 0.982906031 |
| 217597_x_at | 0.080233953 | 0.973354171 | 0.334380464 | 0.517187462 |
| 217598_at   | 0.186937857 | 5.663837355 | 4.73E-07    | 8.66E-06    |
| 217599_s_at | 0.032124302 | 1.62222752  | 0.110126203 | 0.23414654  |
| 217600_at   | 0.009802198 | 0.199192117 | 0.842802407 | 0.913604147 |
| 217601_at   | -0.00445145 | -1.17078441 | 0.246427215 | 0.418010592 |
| 217602_at   | 0.000361802 | 0.017904802 | 0.985775657 | 0.993167574 |
| 217603_at   | -0.00138272 | -0.03329864 | 0.973549662 | 0.986596256 |
| 217604_at   | 0.033605639 | 1.339122242 | 0.185705167 | 0.343452735 |
| 217605_at   | -0.00498439 | -0.12239061 | 0.903008684 | 0.948444551 |
| 217606_at   | -0.03161425 | -0.99851848 | 0.322135796 | 0.504057594 |
| 217607_x_at | -0.06195855 | -2.41387474 | 0.018929806 | 0.058963681 |
| 217608_at   | -0.00646718 | -0.14301518 | 0.886769108 | 0.939251295 |
| 217609_at   | 0.099931699 | 2.079913615 | 0.041919367 | 0.110980413 |
| 217610_at   | 0.052574548 | 0.834153782 | 0.407583828 | 0.589830536 |
| 217611_at   | 0.027633719 | 0.767554573 | 0.445835401 | 0.625898459 |
| 217612_at   | -0.05549169 | -1.34988177 | 0.182248304 | 0.339051792 |
| 217613_at   | 0.578441248 | 6.097778388 | 9.11E-08    | 2.35E-06    |
| 217614_at   | -0.04802135 | -0.99545156 | 0.323611865 | 0.50566508  |
| 217615_at   | -0.00847773 | -0.24989788 | 0.803540804 | 0.889413419 |
| 217616_at   | 0.046658319 | 1.007716184 | 0.317736135 | 0.499007743 |
| 217617_at   | 0.439634195 | 5.980483947 | 1.42E-07    | 3.32E-06    |
| 217618_x_at | -0.06528585 | -2.12375992 | 0.037924523 | 0.102504395 |
| 217619_x_at | 0.075293938 | 2.184089724 | 0.032972712 | 0.091854171 |
| 217620_s_at | 0.033705522 | 1.052106444 | 0.297072398 | 0.476074284 |
| 217621_at   | -0.02870177 | -1.35376385 | 0.181013142 | 0.337414053 |
| 217622_at   | 0.011102628 | 0.232024734 | 0.817327645 | 0.898006451 |
| 217623_at   | 0.267936659 | 2.490284087 | 0.015621597 | 0.050296118 |
| 217624_at   | 0.028890818 | 1.017809255 | 0.312954878 | 0.493946157 |
| 217625_x_at | 0.056861802 | 1.483770784 | 0.143231853 | 0.28457891  |
| 217626_at   | 0.096539908 | 2.875584965 | 0.005614859 | 0.021675674 |
| 217627_at   | 0.0830745   | 1.566332911 | 0.122658436 | 0.25380114  |
| 217628_at   | 0.038682074 | 1.467100324 | 0.147698467 | 0.291046731 |
| 217629_at   | -0.00274362 | -0.09268117 | 0.92647317  | 0.961497746 |
| 217630_at   | -0.00509818 | -0.23868681 | 0.812181678 | 0.894590845 |
| 217631_at   | -0.04166302 | -1.01063878 | 0.316346627 | 0.497546423 |
| 217632_at   | -0.00023129 | -0.01460404 | 0.988397715 | 0.994673962 |
| 217633_at   | -0.06252089 | -1.35345308 | 0.181111783 | 0.33751346  |
| 217634_at   | 0.013303306 | 0.381348759 | 0.704324481 | 0.825643796 |
| 217635_s_at | -0.11667765 | -2.12672988 | 0.037666353 | 0.101998586 |
| 217636_at   | 0.025023866 | 0.867428598 | 0.389247519 | 0.572129314 |
| 217637_at   | -0.35948898 | -6.0110852  | 1.27E-07    | 3.05E-06    |
| 217638_at   | -0.02778883 | -0.50051296 | 0.618589669 | 0.765838652 |
| 217639_at   | -0.03907863 | -1.35439686 | 0.180812341 | 0.337180386 |
| 217640_x_at | -0.01646304 | -0.72637944 | 0.4704994   | 0.64706683  |
| 217641_at   | 0.013069317 | 0.328786776 | 0.743489656 | 0.851302513 |
| 217642_at   | 0.053547575 | 1.635837914 | 0.107237122 | 0.229499663 |
| 217643_x_at | 0.110303197 | 2.628174059 | 0.010943752 | 0.037496028 |
| 217644_s_at | 0.012929244 | 0.386168266 | 0.70077141  | 0.823184504 |
| 217645_at   | 0.126371947 | 2.978709659 | 0.004207063 | 0.017108466 |
| 217646_at   | 0.135198641 | 3.606675444 | 0.000642391 | 0.003536554 |
| 217647_at   | 0.035058163 | 0.691958126 | 0.491697902 | 0.665735852 |
| 217648_at   | 0.023231591 | 0.672833136 | 0.503699709 | 0.675847291 |
| 217649_at   | 0.181817367 | 2.022640168 | 0.047684133 | 0.122922033 |
| 217650_x_at | -0.06834009 | -1.31247639 | 0.194479846 | 0.354560385 |
| 217651_at   | -0.16669064 | -3.61108973 | 0.000633527 | 0.003495071 |
| 217652_at   | 0.068758053 | 1.815284056 | 0.074601236 | 0.173912599 |
| 217653_x_at | 0.30515098  | 4.636499205 | 2.03E-05    | 0.000193813 |
| 217654_at   | -0.0225544  | -0.56821461 | 0.572061495 | 0.730348292 |
| 217655_at   | -0.00347658 | -0.09037518 | 0.928297462 | 0.962563982 |
| 217656_at   | 0.024818543 | 0.923885885 | 0.359336671 | 0.542462813 |
| 217657_at   | 0.011085702 | 0.374300927 | 0.709532254 | 0.829224607 |
| 217658_at   | -0.00975404 | -0.17765382 | 0.859607883 | 0.923499892 |
| 217659_at   | 0.000797302 | 0.029390171 | 0.976653336 | 0.988299228 |

|             |             |             |             |             |
|-------------|-------------|-------------|-------------|-------------|
| 217660_at   | -0.00959445 | -0.18143188 | 0.85665506  | 0.921624843 |
| 217661_x_at | -0.05367144 | -0.98426498 | 0.329034065 | 0.511467688 |
| 217662_x_at | 0.136891665 | 3.632057472 | 0.00059299  | 0.003306573 |
| 217663_at   | -0.02117301 | -1.22444249 | 0.225687872 | 0.393172307 |
| 217664_at   | -0.00382823 | -0.09644503 | 0.923496402 | 0.959924207 |
| 217665_at   | 0.017179868 | 0.620941546 | 0.537047303 | 0.7031616   |
| 217666_at   | 0.007389737 | 0.273189084 | 0.785668924 | 0.877750601 |
| 217667_at   | -0.05333505 | -1.33172451 | 0.188110641 | 0.346325058 |
| 217668_at   | -0.10809097 | -2.27104149 | 0.026836241 | 0.077906156 |
| 217669_s_at | -0.02339587 | -0.8148659  | 0.418450406 | 0.600944265 |
| 217670_at   | -0.05012991 | -1.13805931 | 0.259729984 | 0.43377625  |
| 217671_at   | 0.174597674 | 3.053595941 | 0.003398823 | 0.014280361 |
| 217672_x_at | 0.014870241 | 0.393636602 | 0.695278815 | 0.819424614 |
| 217673_x_at | 0.092046905 | 2.393983477 | 0.019888312 | 0.061308349 |
| 217674_at   | -0.03806834 | -1.04262953 | 0.301404723 | 0.480947582 |
| 217675_at   | -0.01925438 | -0.6036373  | 0.548415759 | 0.711687247 |
| 217676_at   | -0.00438176 | -0.08366137 | 0.933610976 | 0.965452861 |
| 217677_at   | -0.05872884 | -2.18918993 | 0.032581353 | 0.090939658 |
| 217678_at   | 0.405853749 | 3.708774072 | 0.000464775 | 0.002693081 |
| 217679_x_at | 0.426821767 | 5.612036675 | 5.74E-07    | 1.01E-05    |
| 217680_x_at | 0.04277231  | 1.125908844 | 0.26479675  | 0.439724161 |
| 217681_at   | -0.03957938 | -0.7256857  | 0.470921469 | 0.647442776 |
| 217682_at   | 0.035760292 | 1.066427045 | 0.290607188 | 0.468975823 |
| 217683_at   | -0.02113058 | -0.65026419 | 0.518064372 | 0.687613831 |
| 217684_at   | 0.003235684 | 0.097160169 | 0.922930938 | 0.959693566 |
| 217685_at   | 0.037169099 | 0.834170294 | 0.4075746   | 0.589830536 |
| 217686_at   | -0.01307545 | -0.33025116 | 0.742388669 | 0.850740033 |
| 217687_at   | 0.108735508 | 1.838329902 | 0.071086506 | 0.167618536 |
| 217688_at   | 0.034056317 | 0.824350966 | 0.413084913 | 0.595362344 |
| 217689_at   | -0.04811869 | -0.99995272 | 0.321447068 | 0.503279466 |
| 217690_at   | 0.115770259 | 1.997449207 | 0.050428742 | 0.128324394 |
| 217691_x_at | -0.04495183 | -0.88917915 | 0.377544559 | 0.560181317 |
| 217692_at   | -0.03025467 | -0.85085075 | 0.398317663 | 0.580632539 |
| 217693_x_at | 0.077994543 | 3.425810765 | 0.001126325 | 0.00562334  |
| 217694_at   | -0.00375442 | -0.21181177 | 0.832989285 | 0.907622623 |
| 217695_x_at | -0.011348   | -0.41110492 | 0.682496036 | 0.810170598 |
| 217696_at   | -0.06112449 | -0.73443879 | 0.465611824 | 0.643269456 |
| 217697_at   | -0.00092249 | -0.03675089 | 0.970808616 | 0.985214037 |
| 217698_at   | -0.02330053 | -0.94690527 | 0.347577733 | 0.53060191  |
| 217699_at   | -0.05617653 | -1.4952882  | 0.140208511 | 0.280329206 |
| 217700_at   | -0.04213394 | -0.6451726  | 0.521334858 | 0.690171436 |
| 217701_x_at | 0.122032871 | 3.503947614 | 0.000885388 | 0.00460649  |
| 217702_at   | -0.00771569 | -0.22817204 | 0.820307277 | 0.900036158 |
| 217703_x_at | 0.168062908 | 3.908381258 | 0.000243644 | 0.001560465 |
| 217704_x_at | 0.14288222  | 3.279444527 | 0.001753773 | 0.008168798 |
| 217705_at   | 0.03002709  | 1.646292603 | 0.105059978 | 0.226020052 |
| 217706_at   | -0.03905837 | -0.71196252 | 0.479314573 | 0.654752174 |
| 217707_x_at | -0.05918815 | -1.22034308 | 0.227225798 | 0.394775144 |
| 217708_x_at | -0.1212037  | -1.96531961 | 0.054125452 | 0.135766753 |
| 217709_at   | 0.010163159 | 0.552360404 | 0.582803409 | 0.738638512 |
| 217710_x_at | -0.0623755  | -1.95700908 | 0.055118574 | 0.137710157 |
| 217711_at   | -0.03697949 | -0.9139601  | 0.364485263 | 0.547806543 |
| 217712_at   | -0.00880257 | -0.43268412 | 0.666833462 | 0.799456009 |
| 217713_x_at | 0.263702402 | 6.016684028 | 1.24E-07    | 2.99E-06    |
| 217714_x_at | 0.134096316 | 3.586815417 | 0.000683758 | 0.003723014 |
| 217715_x_at | 0.20980538  | 4.404036052 | 4.58E-05    | 0.000382456 |
| 217716_s_at | 0.303641311 | 6.320361927 | 3.88E-08    | 1.21E-06    |
| 217717_s_at | -0.35378985 | -3.33564717 | 0.00148142  | 0.007093928 |
| 217718_s_at | -0.34137122 | -5.10942472 | 3.71E-06    | 4.72E-05    |
| 217719_at   | -0.27213512 | -6.48151458 | 2.09E-08    | 7.59E-07    |
| 217720_at   | -0.21358994 | -2.61794799 | 0.011240958 | 0.038352613 |
| 217721_at   | -0.07746911 | -1.05454304 | 0.295965455 | 0.474879303 |
| 217722_s_at | -0.19535211 | -3.75055457 | 0.000406579 | 0.002405779 |
| 217723_x_at | -0.0435735  | -1.06721905 | 0.290252481 | 0.468521829 |
| 217724_at   | 0.148792655 | 2.532696588 | 0.014019464 | 0.045942064 |
| 217725_x_at | -0.06467641 | -0.61968739 | 0.537867151 | 0.703884475 |
| 217726_at   | 0.011816692 | 0.318748702 | 0.751051095 | 0.856799991 |
| 217727_x_at | -0.1601103  | -3.48623474 | 0.000935278 | 0.004819492 |
| 217728_at   | 0.761098604 | 6.46566883  | 2.22E-08    | 7.96E-07    |
| 217729_s_at | -0.24538452 | -4.15740679 | 0.000106409 | 0.000776051 |
| 217730_at   | 0.431055304 | 4.646741603 | 1.96E-05    | 0.000187844 |
| 217731_s_at | 0.138759561 | 3.449353197 | 0.00104786  | 0.005299409 |
| 217732_s_at | -0.02593171 | -0.41032687 | 0.683063443 | 0.810521224 |
| 217733_s_at | -0.22424933 | -4.51707466 | 3.09E-05    | 0.000275123 |
| 217734_s_at | 0.349082771 | 5.32913937  | 1.65E-06    | 2.42E-05    |

|             |             |             |             |             |
|-------------|-------------|-------------|-------------|-------------|
| 217735_s_at | -0.06657214 | -1.36410791 | 0.177753103 | 0.333031848 |
| 217736_s_at | -0.00949557 | -0.15438499 | 0.877836982 | 0.934650124 |
| 217737_x_at | 0.175067445 | 2.481410739 | 0.015977003 | 0.051244741 |
| 217738_at   | 0.065030323 | 0.391227619 | 0.697048729 | 0.820688159 |
| 217739_s_at | 0.276985621 | 1.361576093 | 0.178546857 | 0.334126795 |
| 217740_x_at | -0.11300951 | -3.11093087 | 0.002880667 | 0.012400574 |
| 217741_s_at | -0.40010219 | -3.21649927 | 0.002114611 | 0.009552834 |
| 217742_s_at | 0.163183125 | 2.708688192 | 0.008842623 | 0.031561555 |
| 217743_s_at | -0.46750709 | -4.234174   | 8.20E-05    | 0.000623867 |
| 217744_s_at | 0.044154557 | 0.793580471 | 0.430643263 | 0.611459801 |
| 217745_s_at | 0.040734155 | 0.558764058 | 0.578453042 | 0.735273702 |
| 217746_s_at | 0.184717254 | 2.391615201 | 0.020005281 | 0.061575716 |
| 217747_s_at | 0.146315508 | 1.859243815 | 0.068018462 | 0.162204851 |
| 217748_at   | -0.20979162 | -5.17250051 | 2.94E-06    | 3.89E-05    |
| 217749_at   | -0.08555139 | -2.17010513 | 0.034067056 | 0.094256476 |
| 217750_s_at | 0.103241274 | 2.406190081 | 0.019295087 | 0.05987613  |
| 217751_at   | 0.261549514 | 6.234685051 | 5.39E-08    | 1.56E-06    |
| 217752_s_at | 0.212350567 | 4.050617975 | 0.000152244 | 0.001046459 |
| 217753_s_at | 0.013069857 | 0.076170738 | 0.939542872 | 0.968360547 |
| 217754_at   | 0.035410617 | 1.124266897 | 0.265486768 | 0.440653673 |
| 217755_at   | -0.40006309 | -5.78288044 | 3.02E-07    | 6.01E-06    |
| 217756_x_at | 0.219538537 | 3.981185803 | 0.000191718 | 0.001271253 |
| 217757_at   | 0.29556843  | 3.4337842   | 0.001099146 | 0.005508303 |
| 217758_s_at | 0.049939347 | 0.936783643 | 0.352716885 | 0.535904233 |
| 217759_at   | 0.002916065 | 0.053020654 | 0.957895893 | 0.978498394 |
| 217760_at   | -0.05525677 | -1.16556211 | 0.248516612 | 0.420772255 |
| 217761_at   | 0.019787972 | 0.205267693 | 0.838074771 | 0.910559246 |
| 217762_s_at | 0.491236413 | 6.268284859 | 4.74E-08    | 1.41E-06    |
| 217763_s_at | 0.542760684 | 6.496004292 | 1.97E-08    | 7.31E-07    |
| 217764_s_at | 0.530731887 | 6.384090428 | 3.04E-08    | 1.00E-06    |
| 217765_at   | 0.036768927 | 1.197408356 | 0.235971456 | 0.405114026 |
| 217766_s_at | -0.34641978 | -6.63211315 | 1.17E-08    | 5.03E-07    |
| 217767_at   | 0.861759523 | 5.091684349 | 3.95E-06    | 4.97E-05    |
| 217768_at   | 0.06846096  | 0.965114668 | 0.33845576  | 0.521181988 |
| 217769_s_at | -0.17871969 | -4.1363816  | 0.000114223 | 0.000824561 |
| 217770_at   | -0.01509841 | -0.2630112  | 0.793465019 | 0.882435143 |
| 217771_at   | 0.333249403 | 4.30184007  | 6.51E-05    | 0.00051317  |
| 217772_s_at | -0.16584135 | -2.02653723 | 0.047271254 | 0.122061872 |
| 217773_s_at | -0.55776621 | -6.05423613 | 1.08E-07    | 2.67E-06    |
| 217774_s_at | 0.09967092  | 1.863566391 | 0.067398471 | 0.161078741 |
| 217775_s_at | 0.107794911 | 2.865231188 | 0.005778033 | 0.022202034 |
| 217776_at   | 0.102635897 | 2.016758196 | 0.048313194 | 0.124106982 |
| 217777_s_at | -0.31846468 | -2.81072531 | 0.006711688 | 0.025136911 |
| 217778_at   | 0.159805042 | 4.506453567 | 3.21E-05    | 0.000283327 |
| 217779_s_at | 0.201065889 | 3.325496019 | 0.001527453 | 0.007270734 |
| 217780_at   | -0.01416966 | -0.28029818 | 0.780236469 | 0.874403277 |
| 217781_s_at | -0.24794837 | -4.2663103  | 7.35E-05    | 0.000569523 |
| 217782_s_at | -0.04982084 | -1.08538214 | 0.282199975 | 0.459502512 |
| 217783_s_at | -0.38205699 | -6.31482534 | 3.96E-08    | 1.24E-06    |
| 217784_at   | 0.14606335  | 4.89284966  | 8.14E-06    | 8.99E-05    |
| 217785_s_at | -0.37239794 | -5.98897186 | 1.38E-07    | 3.25E-06    |
| 217786_at   | -0.06600753 | -1.2848207  | 0.203913359 | 0.366924179 |
| 217787_s_at | -0.01832931 | -0.41483297 | 0.67977987  | 0.808127799 |
| 217788_s_at | 0.13003685  | 1.855631533 | 0.068540259 | 0.163109758 |
| 217789_at   | 0.4778223   | 6.715882594 | 8.43E-09    | 3.94E-07    |
| 217790_s_at | 0.016856986 | 0.373640619 | 0.710020886 | 0.829644777 |
| 217791_s_at | -0.06693784 | -1.42749498 | 0.158747746 | 0.30657481  |
| 217792_at   | 0.20509432  | 4.625187442 | 2.11E-05    | 0.000200216 |
| 217793_at   | -0.06190368 | -1.90088508 | 0.062241595 | 0.151434555 |
| 217794_at   | 0.160065204 | 2.878947417 | 0.005562791 | 0.021518512 |
| 217795_s_at | 0.037948859 | 0.829117556 | 0.410404412 | 0.592607476 |
| 217796_s_at | 0.023199055 | 0.732360192 | 0.466869608 | 0.644258521 |
| 217797_at   | -0.08109532 | -1.48752273 | 0.142241375 | 0.283202723 |
| 217798_at   | 0.157040355 | 3.308484164 | 0.00160764  | 0.00759419  |
| 217799_x_at | 0.021860729 | 0.559583209 | 0.577897678 | 0.734886257 |
| 217800_s_at | -0.36466358 | -3.78838592 | 0.000359961 | 0.002166852 |
| 217801_at   | 0.026988852 | 0.408701184 | 0.684249589 | 0.811153385 |
| 217802_s_at | 0.186416656 | 3.85656071  | 0.000288586 | 0.001801828 |
| 217803_at   | 0.136305776 | 2.382450062 | 0.020463772 | 0.062727497 |
| 217804_s_at | -0.07275538 | -1.87687436 | 0.065519568 | 0.157599597 |
| 217805_at   | 0.071390714 | 0.853078977 | 0.397091005 | 0.579450643 |
| 217806_s_at | 0.044073013 | 1.393830995 | 0.168635083 | 0.320626187 |
| 217807_s_at | 0.241890323 | 4.095610952 | 0.000130986 | 0.000926565 |
| 217808_s_at | -0.26041155 | -5.31678463 | 1.73E-06    | 2.52E-05    |
| 217809_at   | -0.42120416 | -7.27830229 | 9.49E-10    | 9.14E-08    |

|             |             |             |             |             |
|-------------|-------------|-------------|-------------|-------------|
| 217810_x_at | 0.288433122 | 5.202877165 | 2.63E-06    | 3.55E-05    |
| 217811_at   | -0.23478702 | -2.36758577 | 0.021227374 | 0.064655748 |
| 217812_at   | -0.01734043 | -0.21329257 | 0.831839516 | 0.907143909 |
| 217813_s_at | -0.15651159 | -2.34072789 | 0.022671882 | 0.068145253 |
| 217814_at   | -0.32248768 | -3.36236185 | 0.001366461 | 0.006620406 |
| 217815_at   | -0.03208336 | -0.92398772 | 0.359284091 | 0.542415451 |
| 217816_s_at | -0.06187429 | -0.969347   | 0.336358362 | 0.519185901 |
| 217817_at   | 0.020379196 | 0.54183294  | 0.589989156 | 0.744244749 |
| 217818_s_at | -0.06499354 | -1.18929268 | 0.23912398  | 0.408865595 |
| 217819_at   | 0.351414067 | 4.403862599 | 4.58E-05    | 0.000382614 |
| 217820_s_at | 0.565376302 | 4.947093851 | 6.69E-06    | 7.67E-05    |
| 217821_s_at | -0.26060119 | -3.66657612 | 0.000531596 | 0.003016519 |
| 217822_at   | -0.06355744 | -1.02615309 | 0.309039138 | 0.489598623 |
| 217823_s_at | 0.044949405 | 0.727981985 | 0.46952523  | 0.646247859 |
| 217824_at   | -0.17238406 | -2.99727927 | 0.003991442 | 0.016365646 |
| 217825_s_at | -0.0965902  | -1.76152398 | 0.083369023 | 0.189420444 |
| 217826_s_at | -0.04364488 | -0.49480823 | 0.622586706 | 0.768169286 |
| 217827_s_at | 0.059294877 | 0.89056697  | 0.376805461 | 0.559522902 |
| 217828_at   | 0.289836151 | 3.454142551 | 0.001032545 | 0.005235    |
| 217829_s_at | 0.047903377 | 1.327232526 | 0.189582733 | 0.34824626  |
| 217830_s_at | 0.174190116 | 4.21184774  | 8.85E-05    | 0.000664684 |
| 217831_s_at | -0.16029051 | -4.1757494  | 0.000100017 | 0.000736886 |
| 217832_at   | 0.473889369 | 5.88478646  | 2.05E-07    | 4.40E-06    |
| 217833_at   | 0.075954578 | 1.119421836 | 0.267530276 | 0.442766372 |
| 217834_s_at | 0.339451755 | 5.627086069 | 5.43E-07    | 9.68E-06    |
| 217835_x_at | -0.18747766 | -3.45326769 | 0.001035327 | 0.005246721 |
| 217836_s_at | 0.098125318 | 1.847950098 | 0.069661073 | 0.165135278 |
| 217837_s_at | -0.74533219 | -6.4585644  | 2.28E-08    | 8.13E-07    |
| 217838_s_at | -0.51579806 | -6.71850404 | 8.34E-09    | 3.91E-07    |
| 217839_at   | -0.08265398 | -1.83081737 | 0.07221663  | 0.169663335 |
| 217840_at   | -0.2191674  | -4.14956858 | 0.00010926  | 0.000793732 |
| 217841_s_at | -0.27743112 | -5.42475498 | 1.16E-06    | 1.80E-05    |
| 217842_at   | 0.20860014  | 4.283747843 | 6.93E-05    | 0.000540613 |
| 217843_s_at | 0.112739223 | 1.896764489 | 0.062794049 | 0.152430913 |
| 217844_at   | 0.213204565 | 6.043520965 | 1.12E-07    | 2.76E-06    |
| 217845_x_at | -0.17321989 | -2.47561201 | 0.016213184 | 0.051886832 |
| 217846_at   | 0.18217537  | 2.97287578  | 0.004277008 | 0.017345559 |
| 217847_s_at | -0.02409931 | -0.67497618 | 0.502347    | 0.674575297 |
| 217848_s_at | -0.25487533 | -3.79076245 | 0.00035721  | 0.002153865 |
| 217849_s_at | 0.05728725  | 1.202192568 | 0.234127223 | 0.403005395 |
| 217850_at   | -0.08979892 | -1.55802448 | 0.124615293 | 0.256951716 |
| 217851_s_at | 0.081337233 | 1.271982134 | 0.208407055 | 0.372490626 |
| 217852_s_at | -0.10566688 | -2.04349746 | 0.045510102 | 0.118520919 |
| 217853_at   | 0.444635237 | 4.107042391 | 0.00012606  | 0.000897544 |
| 217854_s_at | -0.1349153  | -2.61292367 | 0.011389659 | 0.038769594 |
| 217855_x_at | 0.080106113 | 2.062750037 | 0.043579915 | 0.114528612 |
| 217856_at   | -0.14173726 | -2.35456454 | 0.021917105 | 0.066353721 |
| 217857_s_at | -0.01248722 | -0.24113364 | 0.810293748 | 0.893480255 |
| 217858_s_at | -0.20499504 | -2.60203201 | 0.011718179 | 0.039684625 |
| 217859_s_at | -0.06826815 | -2.47274302 | 0.016331197 | 0.052152472 |
| 217860_at   | -0.15613556 | -2.64083106 | 0.010585821 | 0.036501928 |
| 217861_s_at | 0.023316985 | 0.681458615 | 0.498267264 | 0.671285701 |
| 217862_at   | 0.004186489 | 0.079798068 | 0.936669909 | 0.967161509 |
| 217863_at   | 4.80E-05    | 0.001104156 | 0.999122764 | 0.999548259 |
| 217864_s_at | 0.108365591 | 2.725210574 | 0.008460039 | 0.030469503 |
| 217865_at   | 0.276954666 | 3.518512688 | 0.000846269 | 0.004433416 |
| 217866_at   | 0.127214072 | 3.847797159 | 0.000296934 | 0.001846986 |
| 217867_x_at | 0.126139458 | 2.418569693 | 0.018709701 | 0.058351289 |
| 217868_s_at | -0.37234018 | -7.78662232 | 1.32E-10    | 2.50E-08    |
| 217869_at   | 0.11973048  | 1.774852564 | 0.081119056 | 0.185657166 |
| 217870_s_at | 0.101250988 | 1.683125756 | 0.097674797 | 0.213736187 |
| 217871_s_at | -0.41206148 | -5.84329172 | 2.40E-07    | 4.97E-06    |
| 217872_at   | -0.0234827  | -0.77266256 | 0.442829234 | 0.623061457 |
| 217873_at   | -0.18325231 | -2.37432928 | 0.020877849 | 0.063764971 |
| 217874_at   | -0.01870819 | -0.36280657 | 0.718055489 | 0.834972574 |
| 217875_s_at | -0.28168179 | -4.3256611  | 6.00E-05    | 0.000479246 |
| 217876_at   | -0.00834935 | -0.27798958 | 0.781999403 | 0.875347325 |
| 217877_s_at | 0.019055504 | 0.443861446 | 0.658778392 | 0.793780806 |
| 217878_s_at | -0.04506887 | -1.03075419 | 0.306894123 | 0.487091031 |
| 217879_at   | -0.0107019  | -0.22333318 | 0.824053363 | 0.902285638 |
| 217880_at   | -0.05634798 | -1.40350284 | 0.165747033 | 0.316612541 |
| 217881_s_at | -0.13138459 | -2.90615239 | 0.005157668 | 0.02021987  |
| 217882_at   | -0.21423206 | -3.75251805 | 0.000404024 | 0.002391924 |
| 217883_at   | -0.21998304 | -2.47400043 | 0.01627938  | 0.05201866  |
| 217884_at   | 0.043621876 | 1.301640256 | 0.198136228 | 0.359262589 |

|             |             |             |             |             |
|-------------|-------------|-------------|-------------|-------------|
| 217885_at   | 0.028758477 | 0.691899136 | 0.491734678 | 0.665735852 |
| 217886_at   | 0.004954725 | 0.081077655 | 0.935656634 | 0.96656533  |
| 217887_s_at | 0.198324475 | 2.657334213 | 0.010135165 | 0.035260665 |
| 217888_s_at | 0.134951692 | 3.486944259 | 0.000933229 | 0.00481206  |
| 217889_s_at | -0.05304611 | -0.53711632 | 0.593222112 | 0.746530456 |
| 217890_s_at | 0.109817292 | 2.21800206  | 0.030446228 | 0.086093186 |
| 217891_at   | -0.12483651 | -2.16825606 | 0.03421411  | 0.094581128 |
| 217892_s_at | 0.171306448 | 4.114173001 | 0.000123079 | 0.000879398 |
| 217893_s_at | 0.108707927 | 1.998986801 | 0.050257408 | 0.127975847 |
| 217894_at   | 0.158104482 | 1.657236398 | 0.102819671 | 0.22229183  |
| 217895_at   | 0.104898831 | 1.95658472  | 0.0551697   | 0.137814781 |
| 217896_s_at | 0.078849398 | 2.584732659 | 0.012257725 | 0.041171069 |
| 217897_at   | 0.169882808 | 2.140187814 | 0.036515628 | 0.099533815 |
| 217898_at   | -0.13879645 | -1.83651706 | 0.071357846 | 0.168078678 |
| 217899_at   | 0.119249683 | 3.660303252 | 0.000542282 | 0.003067803 |
| 217900_at   | -0.01343558 | -0.21232391 | 0.83259159  | 0.907424993 |
| 217901_at   | 0.015844888 | 0.41788786  | 0.677557316 | 0.806578898 |
| 217902_s_at | -0.02630874 | -0.38473437 | 0.701827822 | 0.823948266 |
| 217903_at   | -0.32702196 | -6.11494575 | 8.53E-08    | 2.23E-06    |
| 217904_s_at | 0.024777933 | 0.283329234 | 0.777923596 | 0.872598985 |
| 217905_at   | 0.117969895 | 4.385022349 | 4.89E-05    | 0.000403839 |
| 217906_at   | -0.10131256 | -1.1015894  | 0.275146911 | 0.451526245 |
| 217907_at   | -0.06648396 | -1.32913038 | 0.188959717 | 0.347387399 |
| 217908_s_at | -0.39852334 | -6.35966319 | 3.34E-08    | 1.08E-06    |
| 217909_s_at | -0.17137984 | -3.99302686 | 0.000184351 | 0.001230989 |
| 217910_x_at | -0.07299364 | -2.36952082 | 0.021126547 | 0.064392527 |
| 217911_s_at | 0.353039168 | 2.042954556 | 0.045565586 | 0.11863085  |
| 217912_at   | -0.04642746 | -1.51676285 | 0.13470607  | 0.272238568 |
| 217913_at   | -0.06476377 | -1.47257006 | 0.146221044 | 0.288874145 |
| 217914_at   | 0.117923257 | 2.679122334 | 0.009567026 | 0.03365894  |
| 217915_s_at | -0.18492037 | -1.7496802  | 0.085411622 | 0.19313986  |
| 217916_s_at | -0.19797406 | -4.39274531 | 4.76E-05    | 0.000395029 |
| 217917_s_at | -0.14525002 | -2.79059058 | 0.007090429 | 0.026330324 |
| 217918_at   | -0.17382621 | -2.73807039 | 0.008172836 | 0.029606906 |
| 217919_s_at | -0.0439364  | -0.96444865 | 0.3387866   | 0.521529717 |
| 217920_at   | 0.003761245 | 0.130361674 | 0.896727023 | 0.944627488 |
| 217921_at   | 0.052265848 | 1.62367556  | 0.109815859 | 0.233608947 |
| 217922_at   | -0.15891828 | -3.23162765 | 0.002022004 | 0.009193021 |
| 217923_at   | -0.18024156 | -2.61815561 | 0.011234851 | 0.038334705 |
| 217924_at   | -0.18760184 | -4.55143646 | 2.74E-05    | 0.000248835 |
| 217925_s_at | -0.13644414 | -3.39516461 | 0.001236834 | 0.006092426 |
| 217926_at   | -0.15341837 | -3.89526599 | 0.000254336 | 0.001616207 |
| 217927_at   | -0.11802821 | -1.27027277 | 0.209010871 | 0.373345877 |
| 217928_s_at | 0.144258099 | 4.476869785 | 3.56E-05    | 0.00031033  |
| 217929_s_at | -0.02009279 | -0.71097832 | 0.479919713 | 0.655318418 |
| 217930_s_at | -0.24141164 | -4.20115569 | 9.18E-05    | 0.000685304 |
| 217931_at   | 0.094067524 | 1.882741217 | 0.064705424 | 0.156069665 |
| 217932_at   | -0.12125013 | -2.50792193 | 0.014936254 | 0.048420939 |
| 217933_s_at | 0.276996198 | 2.111577133 | 0.038999753 | 0.104729736 |
| 217934_x_at | -0.09675454 | -2.97255947 | 0.004280832 | 0.017359489 |
| 217935_s_at | -0.31582652 | -7.28181077 | 9.36E-10    | 9.04E-08    |
| 217936_at   | 0.530419201 | 5.494042916 | 8.94E-07    | 1.46E-05    |
| 217937_s_at | 0.040231665 | 0.647510462 | 0.519831825 | 0.689090438 |
| 217938_s_at | -0.28927708 | -6.37476866 | 3.15E-08    | 1.03E-06    |
| 217939_s_at | -0.05304446 | -1.53013185 | 0.131367927 | 0.267325685 |
| 217940_s_at | -0.00092102 | -0.01257227 | 0.990011776 | 0.995326806 |
| 217941_s_at | 0.83140153  | 7.451491681 | 4.84E-10    | 5.71E-08    |
| 217942_at   | -0.16438056 | -3.45090907 | 0.001042861 | 0.005276527 |
| 217943_s_at | -0.08809204 | -1.38218668 | 0.172163331 | 0.325410174 |
| 217944_at   | 0.021259246 | 0.472840764 | 0.638084271 | 0.779778027 |
| 217945_at   | 0.054841804 | 0.65578738  | 0.514529    | 0.685033353 |
| 217946_s_at | -0.06754891 | -1.28170213 | 0.204998199 | 0.368179534 |
| 217947_at   | 0.508664926 | 5.889651793 | 2.01E-07    | 4.36E-06    |
| 217948_at   | 0.029010731 | 0.684401215 | 0.496421313 | 0.669525344 |
| 217949_s_at | -0.02089905 | -0.66988257 | 0.505565351 | 0.677214825 |
| 217950_at   | 0.138212321 | 3.042038803 | 0.003513295 | 0.014676079 |
| 217951_s_at | 0.065293497 | 1.56026812  | 0.12408441  | 0.256075934 |
| 217952_x_at | 0.177551646 | 2.987391115 | 0.004104943 | 0.016751724 |
| 217953_at   | -0.00161563 | -0.10881136 | 0.913724072 | 0.954234837 |
| 217954_s_at | 0.25995904  | 4.567474228 | 2.59E-05    | 0.000237824 |
| 217955_at   | 0.143458008 | 2.065743793 | 0.043286235 | 0.113917583 |
| 217956_s_at | -0.19062483 | -2.63720692 | 0.010687202 | 0.036783399 |
| 217957_at   | -0.32842961 | -3.96804951 | 0.000200222 | 0.001318257 |
| 217958_at   | 0.047921941 | 0.878271828 | 0.383385228 | 0.566028629 |
| 217959_s_at | -0.10769096 | -1.27163884 | 0.208528217 | 0.37261777  |

|             |             |             |             |             |
|-------------|-------------|-------------|-------------|-------------|
| 217960_s_at | -0.18771509 | -3.6618997  | 0.000539543 | 0.003055017 |
| 217961_at   | -0.00438553 | -0.11501801 | 0.908824285 | 0.951712239 |
| 217962_at   | -0.14010473 | -2.35903266 | 0.021678208 | 0.065737718 |
| 217963_s_at | -0.31902958 | -5.73300404 | 3.64E-07    | 7.00E-06    |
| 217964_at   | -0.16790837 | -2.34804539 | 0.022269881 | 0.067180932 |
| 217965_s_at | 0.38110033  | 4.00763758  | 0.000175636 | 0.001180383 |
| 217966_s_at | 0.160668267 | 3.564589619 | 0.000733061 | 0.003945322 |
| 217967_s_at | 0.33586473  | 3.259023704 | 0.00186394  | 0.008603037 |
| 217968_at   | -0.31420901 | -5.02691831 | 5.01E-06    | 6.03E-05    |
| 217969_at   | -0.25940995 | -3.64922336 | 0.000561658 | 0.003159823 |
| 217970_s_at | 0.033074008 | 0.907513941 | 0.367854145 | 0.551016807 |
| 217971_at   | -0.11133333 | -1.52912944 | 0.131615919 | 0.267560157 |
| 217972_at   | -0.17567508 | -3.32485914 | 0.001530386 | 0.007283143 |
| 217973_at   | 0.159914077 | 2.684681911 | 0.009426797 | 0.03326772  |
| 217974_at   | 0.010880989 | 0.334111691 | 0.739488749 | 0.848918116 |
| 217975_at   | 0.420830568 | 4.043208582 | 0.00015605  | 0.001068838 |
| 217976_s_at | -0.29049933 | -4.08803059 | 0.000134355 | 0.000945157 |
| 217977_at   | 0.056414393 | 1.438201789 | 0.155699235 | 0.302189178 |
| 217978_s_at | -0.24886253 | -5.15768909 | 3.10E-06    | 4.07E-05    |
| 217979_at   | -1.01074756 | -6.50573975 | 1.90E-08    | 7.12E-07    |
| 217980_s_at | 0.02807094  | 0.667587587 | 0.507019046 | 0.678373057 |
| 217981_s_at | 0.018823054 | 0.408755077 | 0.684210254 | 0.811148368 |
| 217982_s_at | 0.06729811  | 1.445526407 | 0.15364011  | 0.299336666 |
| 217983_s_at | 0.07120084  | 0.68355649  | 0.496950843 | 0.670057536 |
| 217984_at   | 0.117395536 | 1.670430244 | 0.100170735 | 0.217861233 |
| 217985_s_at | 0.321946569 | 6.162865426 | 7.10E-08    | 1.93E-06    |
| 217986_s_at | 0.282348126 | 5.352237265 | 1.51E-06    | 2.25E-05    |
| 217987_at   | -0.01662813 | -0.2314705  | 0.817756116 | 0.898207288 |
| 217988_at   | 0.070109507 | 1.234879943 | 0.221806612 | 0.388785942 |
| 217989_at   | 0.320678485 | 2.886753847 | 0.005443627 | 0.02113113  |
| 217990_at   | -0.10659945 | -2.32083602 | 0.023797559 | 0.07094577  |
| 217991_x_at | -0.22462516 | -4.82754726 | 1.03E-05    | 0.000109373 |
| 217992_s_at | 0.041215173 | 0.600663548 | 0.550381645 | 0.713327044 |
| 217993_s_at | -0.10184397 | -1.70328128 | 0.093817119 | 0.207424295 |
| 217994_x_at | 0.227406138 | 6.007973102 | 1.28E-07    | 3.07E-06    |
| 217995_at   | 0.31535921  | 4.541021387 | 2.84E-05    | 0.000256241 |
| 217996_at   | -0.36113725 | -4.06507222 | 0.000145075 | 0.001006318 |
| 217997_at   | -0.51892173 | -5.55109248 | 7.22E-07    | 1.22E-05    |
| 217998_at   | -0.02107217 | -0.38677357 | 0.700325637 | 0.822905508 |
| 217999_s_at | -0.05872036 | -2.12454502 | 0.037856126 | 0.102394602 |
| 218000_s_at | -0.04567713 | -1.04882277 | 0.298568654 | 0.477735502 |
| 218001_at   | 0.028782078 | 0.575639884 | 0.567063946 | 0.726874946 |
| 218002_s_at | -0.22242603 | -1.48474145 | 0.142975087 | 0.284270957 |
| 218003_s_at | -0.31105487 | -4.28206609 | 6.97E-05    | 0.000542883 |
| 218004_at   | 0.116418244 | 1.85498539  | 0.06863395  | 0.163289246 |
| 218005_at   | 0.312773542 | 5.3561263   | 1.49E-06    | 2.22E-05    |
| 218006_s_at | 0.230939034 | 4.536430189 | 2.89E-05    | 0.00025995  |
| 218007_s_at | 0.185274539 | 2.64959369  | 0.01034431  | 0.035835044 |
| 218008_at   | 0.110050078 | 1.582177688 | 0.118994882 | 0.247944957 |
| 218009_s_at | 0.028198996 | 0.690251259 | 0.492762604 | 0.666501613 |
| 218010_x_at | 0.041461046 | 0.601174364 | 0.550043701 | 0.713033794 |
| 218011_at   | -0.2135547  | -3.53455727 | 0.000805082 | 0.00425103  |
| 218012_at   | -0.40443736 | -5.42397907 | 1.16E-06    | 1.80E-05    |
| 218013_x_at | -0.14905817 | -1.7120048  | 0.09218678  | 0.204700729 |
| 218014_at   | 0.124431577 | 1.706066488 | 0.093294033 | 0.206533431 |
| 218015_s_at | 0.04191768  | 1.106861503 | 0.272879429 | 0.448909613 |
| 218016_s_at | 0.034012764 | 0.663833552 | 0.509401786 | 0.680420642 |
| 218017_s_at | -0.10951459 | -2.03084451 | 0.046818504 | 0.121193895 |
| 218018_at   | -0.02023652 | -0.59104409 | 0.556765156 | 0.718896293 |
| 218019_s_at | -0.1791051  | -2.41378097 | 0.018934226 | 0.058965119 |
| 218020_s_at | 0.232813354 | 6.03666027  | 1.15E-07    | 2.81E-06    |
| 218021_at   | 0.056791208 | 2.046857594 | 0.045167997 | 0.117835978 |
| 218022_at   | 0.090817677 | 2.82630732  | 0.006431485 | 0.024269215 |
| 218023_s_at | 0.109008399 | 2.940714832 | 0.00468241  | 0.018687825 |
| 218024_at   | -0.07245808 | -1.41379229 | 0.162716626 | 0.312175636 |
| 218025_s_at | -0.1021212  | -1.55507971 | 0.125314829 | 0.25805635  |
| 218026_at   | -0.00395768 | -0.08100238 | 0.935716243 | 0.966578766 |
| 218027_at   | -0.394892   | -4.73175538 | 1.45E-05    | 0.000145447 |
| 218028_at   | 0.099891324 | 0.950327452 | 0.345851263 | 0.528997729 |
| 218029_at   | -0.26876924 | -6.04622354 | 1.11E-07    | 2.73E-06    |
| 218030_at   | -0.15383624 | -3.58450612 | 0.000688729 | 0.003746626 |
| 218031_s_at | 0.492857397 | 5.821120457 | 2.61E-07    | 5.34E-06    |
| 218032_at   | -0.2907319  | -3.99495336 | 0.000183178 | 0.001224624 |
| 218033_s_at | -0.66021451 | -7.93212326 | 7.47E-11    | 1.80E-08    |
| 218034_at   | -0.00686216 | -0.07316582 | 0.941923481 | 0.969917428 |



|             |             |             |             |             |
|-------------|-------------|-------------|-------------|-------------|
| 218035_s_at | 0.068935224 | 1.573918616 | 0.120893378 | 0.250938965 |
| 218036_x_at | 0.036268987 | 0.50815727  | 0.613251771 | 0.761587395 |
| 218037_at   | -0.18637973 | -2.58265125 | 0.012324141 | 0.041350927 |
| 218038_at   | -0.01538291 | -0.45727902 | 0.649162301 | 0.787288311 |
| 218039_at   | 0.072156418 | 1.952601675 | 0.055651559 | 0.138770265 |
| 218040_at   | 0.177890957 | 3.99085394  | 0.000185682 | 0.001237658 |
| 218041_x_at | 0.162803946 | 1.155027751 | 0.252769927 | 0.425733836 |
| 218042_at   | -0.29572236 | -3.02266782 | 0.003713266 | 0.015397408 |
| 218043_s_at | -0.03903735 | -1.42047712 | 0.160770926 | 0.309425701 |
| 218044_x_at | 0.012425014 | 0.227083205 | 0.821149855 | 0.900562669 |
| 218045_x_at | -0.36464661 | -5.66531767 | 4.70E-07    | 8.62E-06    |
| 218046_s_at | 0.116299711 | 3.335461019 | 0.001482252 | 0.007095633 |
| 218047_at   | 0.028642561 | 0.418526472 | 0.677093064 | 0.806266523 |
| 218048_at   | -0.26108788 | -5.46334048 | 1.00E-06    | 1.60E-05    |
| 218049_s_at | -0.09098084 | -1.46073095 | 0.149433608 | 0.293430376 |
| 218050_at   | 0.024220807 | 0.530610608 | 0.597694994 | 0.749926802 |
| 218051_s_at | 0.444451967 | 3.611656165 | 0.000632398 | 0.003490135 |
| 218052_s_at | -0.02242688 | -0.68259821 | 0.497551927 | 0.670662517 |
| 218053_at   | 0.593331567 | 5.933797007 | 1.70E-07    | 3.82E-06    |
| 218054_s_at | 0.05455882  | 1.511195563 | 0.136115867 | 0.274281543 |
| 218055_s_at | 0.176927851 | 2.859387505 | 0.005872054 | 0.022488405 |
| 218056_at   | 0.046203316 | 1.374940068 | 0.174387497 | 0.328474986 |
| 218057_x_at | 0.088243103 | 1.70999698  | 0.092559939 | 0.2052438   |
| 218058_at   | 0.09716429  | 2.623691956 | 0.011073125 | 0.037869614 |
| 218059_at   | -0.0261777  | -0.40637312 | 0.685949597 | 0.812462747 |
| 218060_s_at | 0.002393109 | 0.078227225 | 0.937913966 | 0.96750215  |
| 218061_at   | 0.1273568   | -2.98379531 | 0.004146958 | 0.016896328 |
| 218062_x_at | 0.421214144 | 5.980843908 | 1.42E-07    | 3.32E-06    |
| 218063_s_at | -0.0895634  | -1.79126257 | 0.078418593 | 0.180774941 |
| 218064_s_at | 0.009057369 | 0.14354856  | 0.886349742 | 0.939164447 |
| 218065_s_at | 0.17207837  | 3.299793587 | 0.001650121 | 0.007767949 |
| 218066_at   | 0.3010307   | 5.318050543 | 1.72E-06    | 2.51E-05    |
| 218067_s_at | 0.010235545 | 0.121556393 | 0.903666466 | 0.94895205  |
| 218068_s_at | 0.064729604 | 1.913786107 | 0.060538536 | 0.148107374 |
| 218069_at   | -0.03281276 | -0.95724982 | 0.342376136 | 0.525336433 |
| 218070_s_at | 0.134433595 | 3.311757412 | 0.001591909 | 0.007533415 |
| 218071_s_at | -0.04541073 | -1.47065918 | 0.146735866 | 0.289558429 |
| 218072_at   | -0.00383228 | -0.11248127 | 0.910826472 | 0.952907881 |
| 218073_s_at | -0.06438936 | -2.32741308 | 0.023419978 | 0.07001242  |
| 218074_at   | 0.086955317 | 1.75025467  | 0.085311598 | 0.192998195 |
| 218075_at   | 0.005471276 | 0.180836338 | 0.85712038  | 0.921938741 |
| 218076_s_at | 0.211619257 | 4.895030589 | 8.07E-06    | 8.93E-05    |
| 218077_s_at | 0.039881042 | 1.453000372 | 0.151560955 | 0.296435982 |
| 218078_s_at | -0.03509993 | -1.12594256 | 0.264782596 | 0.439724161 |
| 218079_s_at | -0.12692298 | -1.83358711 | 0.071798229 | 0.168937899 |
| 218080_x_at | 0.080971868 | 2.170874451 | 0.034006036 | 0.094128438 |
| 218081_at   | -0.64173478 | -9.041863   | 1.04E-12    | 2.64E-09    |
| 218082_s_at | -0.25252513 | -3.25960031 | 0.001860742 | 0.008593592 |
| 218083_at   | -0.22776318 | -5.92797695 | 1.74E-07    | 3.88E-06    |
| 218084_x_at | 0.197248344 | 3.629650438 | 0.000597514 | 0.003325543 |
| 218085_at   | -0.12928597 | -1.38911699 | 0.170056673 | 0.322505848 |
| 218086_at   | -0.06012924 | -1.70631377 | 0.093247708 | 0.20645133  |
| 218087_s_at | 0.191266923 | 2.271908735 | 0.026780505 | 0.077799945 |
| 218088_s_at | 0.131016815 | 2.978958487 | 0.004204103 | 0.017100078 |
| 218089_at   | 0.087605883 | 3.500220545 | 0.000895671 | 0.004652407 |
| 218090_s_at | 0.163483983 | 2.191347812 | 0.032417002 | 0.090618993 |
| 218091_at   | -0.03109456 | -0.88882628 | 0.377732628 | 0.560291344 |
| 218092_s_at | 0.141722692 | 2.267221372 | 0.027082976 | 0.078454262 |
| 218093_s_at | 0.176619845 | 3.607434812 | 0.000640858 | 0.003528994 |
| 218094_s_at | 0.098018999 | 0.89016603  | 0.377018891 | 0.559711378 |
| 218095_s_at | 0.308346039 | 3.898724869 | 0.000251473 | 0.001601658 |
| 218096_at   | 0.13147385  | 2.190031232 | 0.03251719  | 0.090822964 |
| 218097_s_at | -0.06195653 | -1.4255238  | 0.159314012 | 0.307389449 |
| 218098_at   | -0.10169597 | -1.66519745 | 0.101214571 | 0.21961847  |
| 218099_at   | 0.138337495 | 2.796707777 | 0.006973331 | 0.025964517 |
| 218100_s_at | 0.172198131 | 1.906940859 | 0.061437176 | 0.149811778 |
| 218101_s_at | -0.21720845 | -2.8051675  | 0.006814325 | 0.025467955 |
| 218102_at   | 0.418133547 | 4.323189626 | 6.05E-05    | 0.000482641 |
| 218103_at   | 0.213619107 | 4.735297042 | 1.43E-05    | 0.000143882 |
| 218104_at   | 0.005800379 | 0.148927443 | 0.882122515 | 0.936944636 |
| 218105_s_at | -0.14701357 | -4.0149254  | 0.00017144  | 0.001157309 |
| 218106_s_at | -0.00343299 | -0.06669718 | 0.947049946 | 0.972761952 |
| 218107_at   | 0.006535779 | 0.12379257  | 0.901903397 | 0.947912753 |
| 218108_at   | -0.33440753 | -4.35601301 | 5.41E-05    | 0.000440078 |
| 218109_s_at | 0.127682803 | 1.435407515 | 0.156490409 | 0.303211192 |

|             |             |             |             |             |
|-------------|-------------|-------------|-------------|-------------|
| 218110_at   | 0.014532837 | 0.389134139 | 0.698588214 | 0.821614289 |
| 218111_s_at | -0.17129406 | -2.66820018 | 0.009848084 | 0.03446868  |
| 218112_at   | -0.04207413 | -1.03670904 | 0.304133047 | 0.483987827 |
| 218113_at   | 0.030252713 | 0.713777689 | 0.478199628 | 0.653768669 |
| 218114_at   | 0.093321015 | 2.314729019 | 0.024152993 | 0.071738259 |
| 218115_at   | -0.0425834  | -0.93205504 | 0.355134599 | 0.53823577  |
| 218116_at   | 0.061451816 | 1.419637304 | 0.16101437  | 0.309747512 |
| 218117_at   | -0.06676363 | -1.01814615 | 0.312796125 | 0.493835115 |
| 218118_s_at | -0.16628408 | -3.96561    | 0.000201841 | 0.001327156 |
| 218119_at   | -0.31370067 | -4.15605462 | 0.000106896 | 0.000779218 |
| 218120_s_at | -0.44765456 | -5.57098602 | 6.70E-07    | 1.15E-05    |
| 218121_at   | -0.04891151 | -1.22079341 | 0.227056482 | 0.394572217 |
| 218122_s_at | -0.13916955 | -3.73066595 | 0.000433354 | 0.002536999 |
| 218123_at   | 0.134830615 | 1.829913091 | 0.072353674 | 0.169887066 |
| 218124_at   | 0.22428307  | 3.516101293 | 0.00085263  | 0.004458899 |
| 218125_s_at | -0.03769189 | -0.80661001 | 0.423154661 | 0.604960674 |
| 218126_at   | 0.077856375 | 2.564166297 | 0.01292848  | 0.043007043 |
| 218127_at   | 0.061923508 | 1.22150029  | 0.226790888 | 0.394309993 |
| 218128_at   | 0.040518361 | 1.225691529 | 0.225220802 | 0.392496318 |
| 218129_s_at | 0.044427236 | 0.786258204 | 0.434886067 | 0.615550116 |
| 218130_at   | 0.226759373 | 3.899070517 | 0.000251189 | 0.001600532 |
| 218131_s_at | 0.122256364 | 3.38661364  | 0.001269455 | 0.006220205 |
| 218132_s_at | 0.136918806 | 2.681238    | 0.009513439 | 0.033504383 |
| 218133_s_at | -0.32847114 | -4.2820633  | 6.97E-05    | 0.000542883 |
| 218134_s_at | 0.171036479 | 2.959785972 | 0.004437904 | 0.017881248 |
| 218135_at   | -0.16731366 | -2.34708145 | 0.02232247  | 0.067276003 |
| 218136_s_at | -0.14324548 | -2.56198106 | 0.013001673 | 0.043195643 |
| 218137_s_at | -0.10626671 | -1.27075685 | 0.208839743 | 0.373099849 |
| 218138_at   | -0.30755554 | -4.43230902 | 4.15E-05    | 0.000352762 |
| 218139_s_at | -0.04078796 | -0.70940343 | 0.480888928 | 0.65614068  |
| 218140_x_at | -0.03634624 | -0.66867716 | 0.506328605 | 0.677834831 |
| 218141_at   | -0.10245953 | -2.54207426 | 0.013685947 | 0.045047308 |
| 218142_s_at | 0.091215776 | 2.156339852 | 0.035175205 | 0.096637766 |
| 218143_s_at | 0.209946757 | 5.267965539 | 2.07E-06    | 2.92E-05    |
| 218144_s_at | -0.11861387 | -2.18129865 | 0.033188625 | 0.092352036 |
| 218145_at   | 0.039944132 | 1.073689965 | 0.287365632 | 0.465543366 |
| 218146_at   | 0.095369973 | 2.709071226 | 0.008833577 | 0.031540323 |
| 218147_s_at | 0.051100398 | 0.711841195 | 0.479389145 | 0.654793999 |
| 218148_at   | -0.05413457 | -1.23786966 | 0.220703946 | 0.387613094 |
| 218149_s_at | 0.567834662 | 6.413391691 | 2.71E-08    | 9.20E-07    |
| 218150_at   | 0.090449534 | 1.550433012 | 0.126425045 | 0.259778764 |
| 218151_x_at | 0.055305532 | 2.182373159 | 0.033105357 | 0.092171979 |
| 218152_at   | -0.03540384 | -0.59981135 | 0.550945672 | 0.713706203 |
| 218153_at   | 0.205973772 | 4.092192389 | 0.000132495 | 0.000934723 |
| 218154_at   | 0.019878734 | 0.688128664 | 0.494088392 | 0.667614671 |
| 218155_x_at | 0.228638005 | 4.135625512 | 0.000114514 | 0.000826529 |
| 218156_s_at | -0.02345719 | -0.48758547 | 0.627663755 | 0.772225401 |
| 218157_x_at | 0.26236173  | 5.768945567 | 3.18E-07    | 6.27E-06    |
| 218158_s_at | 0.094072781 | 2.039289669 | 0.045941665 | 0.119491644 |
| 218159_at   | -0.01760976 | -0.46751563 | 0.641865947 | 0.782399128 |
| 218160_at   | -0.41738615 | -5.98191847 | 1.42E-07    | 3.31E-06    |
| 218161_s_at | 0.072523694 | 1.492120419 | 0.141034995 | 0.281477961 |
| 218162_at   | -0.07767361 | -1.10897807 | 0.271972814 | 0.447846764 |
| 218163_at   | -0.28281408 | -3.54074313 | 0.000789718 | 0.004185728 |
| 218164_at   | 0.169488291 | 2.464995321 | 0.016653768 | 0.053012121 |
| 218165_at   | -0.21030417 | -2.96906843 | 0.004323239 | 0.01750287  |
| 218166_s_at | 0.121607531 | 3.273513384 | 0.001785121 | 0.008292343 |
| 218167_at   | -0.11858007 | -1.82566632 | 0.073000202 | 0.171031119 |
| 218168_s_at | 0.105883415 | 2.757209595 | 0.007761937 | 0.028364388 |
| 218169_at   | -0.0286983  | -0.89327196 | 0.375367522 | 0.558378554 |
| 218170_at   | -0.06521048 | -0.96274046 | 0.3396361   | 0.522477509 |
| 218171_at   | 0.183201601 | 2.333674684 | 0.023065473 | 0.069119092 |
| 218172_s_at | -0.03855922 | -0.45429798 | 0.651293645 | 0.788651    |
| 218173_s_at | -0.0333845  | -0.65480251 | 0.51515847  | 0.685526553 |
| 218174_s_at | -0.05491463 | -1.43078226 | 0.157806878 | 0.305126979 |
| 218175_at   | -0.22313654 | -4.91535654 | 7.50E-06    | 8.43E-05    |
| 218176_at   | -0.11271814 | -2.25101422 | 0.02815224  | 0.080906688 |
| 218177_at   | -0.26783176 | -5.95821983 | 1.55E-07    | 3.54E-06    |
| 218178_s_at | -0.16720077 | -4.40802356 | 4.52E-05    | 0.000377708 |
| 218179_s_at | -0.10462117 | -2.40037256 | 0.019575804 | 0.060528701 |
| 218180_s_at | 0.055277867 | 1.266854546 | 0.210222224 | 0.37491028  |
| 218181_s_at | 0.721396129 | 6.604196692 | 1.30E-08    | 5.46E-07    |
| 218182_s_at | -0.03329886 | -1.23109513 | 0.22320832  | 0.390359079 |
| 218183_at   | 0.346199589 | 4.016293694 | 0.000170662 | 0.001152675 |
| 218184_at   | -0.10482202 | -1.45200386 | 0.151836895 | 0.296845779 |

|             |             |             |             |             |
|-------------|-------------|-------------|-------------|-------------|
| 218185_s_at | -0.16586371 | -1.52789172 | 0.131922639 | 0.26804358  |
| 218186_at   | 0.016438955 | 0.519446723 | 0.605406924 | 0.755468788 |
| 218187_s_at | 0.264722058 | 4.507593806 | 3.20E-05    | 0.000282368 |
| 218188_s_at | -0.00796491 | -0.13182118 | 0.895577552 | 0.944100766 |
| 218189_s_at | -0.04105937 | -1.04474156 | 0.300435503 | 0.479839762 |
| 218190_s_at | -0.195411   | -4.00425647 | 0.000177617 | 0.00119208  |
| 218191_s_at | 0.028459868 | 0.353725848 | 0.724814586 | 0.839210366 |
| 218192_at   | -0.10986432 | -1.73492315 | 0.088014535 | 0.197667532 |
| 218193_s_at | -0.10486091 | -1.58322134 | 0.118756694 | 0.247636454 |
| 218194_at   | 0.176546796 | 2.166613242 | 0.034345228 | 0.094857893 |
| 218195_at   | -0.52148304 | -5.8419295  | 2.41E-07    | 5.00E-06    |
| 218196_at   | -0.04478463 | -0.46109736 | 0.646436611 | 0.785453348 |
| 218197_s_at | 0.135957602 | 1.857433394 | 0.068279559 | 0.162653911 |
| 218198_at   | 0.061580632 | 1.699467839 | 0.094537226 | 0.208634522 |
| 218199_s_at | -0.13693653 | -3.2666469  | 0.001822072 | 0.00843943  |
| 218200_s_at | -0.44960329 | -5.67914525 | 4.46E-07    | 8.25E-06    |
| 218201_at   | -0.34546378 | -5.51471371 | 8.27E-07    | 1.37E-05    |
| 218202_x_at | -0.03799877 | -1.4370514  | 0.156024581 | 0.302610361 |
| 218203_at   | 0.039083325 | 0.418099936 | 0.677403129 | 0.806533271 |
| 218204_s_at | 0.382328247 | 7.687708038 | 1.93E-10    | 3.19E-08    |
| 218205_s_at | 0.557746434 | 4.297482802 | 6.61E-05    | 0.000519694 |
| 218206_x_at | 0.039774561 | 0.669299142 | 0.505934695 | 0.677533796 |
| 218207_s_at | -0.28158508 | -6.27806627 | 4.56E-08    | 1.37E-06    |
| 218208_at   | -0.1680722  | -2.70753129 | 0.008869997 | 0.031637502 |
| 218209_s_at | -0.21252098 | -2.88493005 | 0.005471253 | 0.021218435 |
| 218210_at   | 0.054264351 | 0.89944592  | 0.372098574 | 0.555363246 |
| 218211_s_at | 0.009973867 | 0.22017411  | 0.826501242 | 0.903808343 |
| 218212_s_at | -0.31400236 | -4.45327856 | 3.86E-05    | 0.000332791 |
| 218213_s_at | 0.227289117 | 3.260115955 | 0.001857886 | 0.008583604 |
| 218214_at   | -0.16331837 | -3.16588627 | 0.002454254 | 0.010824584 |
| 218215_s_at | 0.0494383   | 0.981726891 | 0.330272655 | 0.512821648 |
| 218216_x_at | 0.024949413 | 0.535300547 | 0.594468932 | 0.747594279 |
| 218217_at   | 0.314510497 | 4.955132546 | 6.50E-06    | 7.49E-05    |
| 218218_at   | 0.1274582   | 1.512751018 | 0.13572081  | 0.273709422 |
| 218219_s_at | -0.12284982 | -2.80490878 | 0.006819138 | 0.02547955  |
| 218220_at   | -0.21783604 | -2.98813797 | 0.004096267 | 0.016727921 |
| 218221_at   | 0.131377282 | 4.440413018 | 4.04E-05    | 0.000344971 |
| 218222_x_at | -0.00158072 | -0.03547289 | 0.971823294 | 0.985727566 |
| 218223_s_at | -0.06816226 | -1.11544843 | 0.269214404 | 0.444861722 |
| 218224_at   | -0.32159534 | -3.48323177 | 0.000943997 | 0.004859936 |
| 218225_at   | -0.10798192 | -2.05846638 | 0.044003134 | 0.115396553 |
| 218226_s_at | -0.29877925 | -3.84039651 | 0.000304165 | 0.001884877 |
| 218227_at   | 0.073775972 | 1.747913516 | 0.085719835 | 0.193670231 |
| 218228_s_at | 0.067990371 | 1.268932074 | 0.209485368 | 0.373984185 |
| 218229_s_at | 0.124713527 | 2.101722819 | 0.039888811 | 0.10664697  |
| 218230_at   | 0.186256334 | 3.182967235 | 0.002334282 | 0.010378406 |
| 218231_at   | 0.119802226 | 3.04393184  | 0.003494302 | 0.014625149 |
| 218232_at   | 0.46521003  | 2.658816773 | 0.01009555  | 0.035164157 |
| 218233_s_at | -0.04144471 | -1.01645405 | 0.31359402  | 0.494692879 |
| 218234_at   | -0.05970708 | -1.79359543 | 0.078040856 | 0.180052755 |
| 218235_s_at | -0.08233416 | -2.24976117 | 0.028236444 | 0.081101745 |
| 218236_s_at | 0.410057607 | 4.860870243 | 9.13E-06    | 9.90E-05    |
| 218237_s_at | -0.07462908 | -1.01600885 | 0.313804178 | 0.494884659 |
| 218238_at   | 0.029222364 | 0.32902071  | 0.743313738 | 0.851197689 |
| 218239_s_at | 0.069247336 | 1.2199697   | 0.227366257 | 0.394889286 |
| 218240_at   | 0.013127675 | 0.363350303 | 0.717651481 | 0.8346548   |
| 218241_at   | 0.103315845 | 1.979387432 | 0.052479231 | 0.132486122 |
| 218242_s_at | 0.348803857 | 5.995501684 | 1.35E-07    | 3.18E-06    |
| 218243_at   | 0.281647923 | 5.257150792 | 2.15E-06    | 3.01E-05    |
| 218244_at   | 0.227098092 | 5.303233497 | 1.82E-06    | 2.62E-05    |
| 218245_at   | 0.054264929 | 1.383664634 | 0.171712393 | 0.324736386 |
| 218246_at   | -0.02045111 | -0.66422191 | 0.509155009 | 0.680253375 |
| 218247_s_at | 0.224627122 | 3.989100723 | 0.000186763 | 0.001243564 |
| 218248_at   | 0.298392211 | 4.831537535 | 1.01E-05    | 0.000108072 |
| 218249_at   | 0.030421192 | 0.716521759 | 0.476516885 | 0.652306194 |
| 218250_s_at | -0.1281078  | -2.17368412 | 0.033783997 | 0.093620472 |
| 218251_at   | 0.512051384 | 6.681031712 | 9.65E-09    | 4.35E-07    |
| 218252_at   | -0.11815164 | -3.19748686 | 0.002236654 | 0.010020101 |
| 218253_s_at | 0.156457501 | 5.006419267 | 5.39E-06    | 6.41E-05    |
| 218254_s_at | 0.178063592 | 2.403805639 | 0.019409706 | 0.060173408 |
| 218255_s_at | 0.003964935 | 0.081073429 | 0.935659981 | 0.96656533  |
| 218256_s_at | 0.16054607  | 3.152783381 | 0.002550181 | 0.011189152 |
| 218257_s_at | 0.008877035 | 0.279907573 | 0.78053467  | 0.874583951 |
| 218258_at   | -0.05995117 | -0.81219397 | 0.419969421 | 0.602177592 |
| 218259_at   | -0.66728244 | -5.39951229 | 1.27E-06    | 1.94E-05    |

|             |             |             |             |             |
|-------------|-------------|-------------|-------------|-------------|
| 218260_at   | -0.40148132 | -5.86359016 | 2.22E-07    | 4.68E-06    |
| 218261_at   | -0.04681348 | -1.12190477 | 0.266481666 | 0.441763657 |
| 218262_at   | -0.02557726 | -0.87510751 | 0.385090229 | 0.567701956 |
| 218263_s_at | 0.16463118  | 2.543308835 | 0.013642579 | 0.044934347 |
| 218264_at   | 0.125069399 | 2.833985954 | 0.00629741  | 0.023849154 |
| 218265_at   | 0.063310223 | 1.265341311 | 0.210760146 | 0.375534157 |
| 218266_s_at | -0.31726354 | -3.83465649 | 0.000309889 | 0.001912657 |
| 218267_at   | 0.122793141 | 3.794747509 | 0.000352643 | 0.002129432 |
| 218268_at   | 0.237454978 | 4.252222954 | 7.71E-05    | 0.000593137 |
| 218269_at   | -0.22957587 | -3.75640467 | 0.00039901  | 0.002367321 |
| 218270_at   | -0.04882745 | -1.3920556  | 0.169169405 | 0.321261305 |
| 218271_s_at | -0.11289707 | -2.09582918 | 0.040428923 | 0.107787952 |
| 218272_at   | 0.158308422 | 3.873510618 | 0.000273074 | 0.001716971 |
| 218273_s_at | -0.71067388 | -5.81334997 | 2.69E-07    | 5.46E-06    |
| 218274_s_at | 0.187252537 | 4.560913747 | 2.65E-05    | 0.000242172 |
| 218275_at   | 0.024386357 | 0.534193435 | 0.595229743 | 0.748130032 |
| 218276_s_at | 0.316873024 | 4.910217912 | 7.64E-06    | 8.54E-05    |
| 218277_s_at | 0.349521474 | 3.765797793 | 0.000387139 | 0.002307243 |
| 218278_at   | -0.03845551 | -1.09633893 | 0.277418169 | 0.45403643  |
| 218279_s_at | 0.006255515 | 0.207223772 | 0.836553938 | 0.909883046 |
| 218280_x_at | 0.294661643 | 2.841221321 | 0.006173442 | 0.023465169 |
| 218281_at   | 0.00069868  | 0.019122105 | 0.984808695 | 0.992709774 |
| 218282_at   | 0.07960702  | 2.406662872 | 0.019272432 | 0.059826599 |
| 218283_at   | -0.16815215 | -3.76029434 | 0.000394053 | 0.002341266 |
| 218284_at   | -0.24779695 | -4.9256878  | 7.23E-06    | 8.19E-05    |
| 218285_s_at | 0.622443983 | 7.021735314 | 2.57E-09    | 1.73E-07    |
| 218286_s_at | -0.28320555 | -4.35094132 | 5.50E-05    | 0.000446449 |
| 218287_s_at | 0.152020461 | 4.446560044 | 3.95E-05    | 0.000338954 |
| 218288_s_at | 0.068331772 | 1.008841085 | 0.317200832 | 0.498482351 |
| 218289_s_at | -0.11707541 | -2.46431197 | 0.016682492 | 0.053088433 |
| 218290_at   | 0.027373631 | 0.764019405 | 0.447922891 | 0.627502033 |
| 218291_at   | 0.010685631 | 0.286195712 | 0.77573816  | 0.871670359 |
| 218292_s_at | -0.53077384 | -6.96434933 | 3.22E-09    | 2.02E-07    |
| 218293_x_at | -0.04986651 | -1.06896078 | 0.28947349  | 0.467725937 |
| 218294_s_at | -0.12725234 | -2.60583822 | 0.011602407 | 0.03938139  |
| 218295_s_at | -0.09397359 | -2.98737812 | 0.004105095 | 0.016751724 |
| 218296_x_at | 0.044179561 | 1.47216685  | 0.146329557 | 0.288996405 |
| 218297_at   | -0.16586328 | -4.03240305 | 0.000161765 | 0.001102242 |
| 218298_s_at | 0.225865209 | 3.772450287 | 0.000378937 | 0.002264702 |
| 218299_at   | -0.06190257 | -0.94840647 | 0.346819694 | 0.529829974 |
| 218300_at   | 0.15425812  | 3.698847634 | 0.00047973  | 0.002765395 |
| 218301_at   | -0.00780725 | -0.15520539 | 0.877193082 | 0.934262266 |
| 218302_at   | 0.188025023 | 2.07629197  | 0.04226511  | 0.111743511 |
| 218303_x_at | 0.28641327  | 3.83566086  | 0.00030888  | 0.001907966 |
| 218304_s_at | 0.745173018 | 5.784059819 | 3.00E-07    | 5.99E-06    |
| 218305_at   | -0.00970902 | -0.29568505 | 0.768516458 | 0.867402967 |
| 218306_s_at | -0.22452673 | -3.44970185 | 0.001046738 | 0.005294942 |
| 218307_at   | -0.06683575 | -1.66810021 | 0.100634437 | 0.218625037 |
| 218308_at   | 0.006256245 | 0.131134852 | 0.896118061 | 0.944272726 |
| 218309_at   | -0.41524042 | -4.60155802 | 2.30E-05    | 0.000214478 |
| 218310_at   | -0.1463772  | -3.37043445 | 0.001333418 | 0.006489505 |
| 218311_at   | 0.130083511 | 1.660513913 | 0.102156364 | 0.221243081 |
| 218312_s_at | -0.03962139 | -0.62415192 | 0.534951604 | 0.701429781 |
| 218313_s_at | 0.107265694 | 1.197347284 | 0.235995066 | 0.405114026 |
| 218314_s_at | 0.048956723 | 1.271068358 | 0.208729676 | 0.372933024 |
| 218315_s_at | -0.04219014 | -0.96322437 | 0.339395303 | 0.522250891 |
| 218316_at   | -0.19319592 | -5.09053525 | 3.97E-06    | 4.98E-05    |
| 218317_x_at | 0.050196089 | 1.455239572 | 0.150942338 | 0.29565933  |
| 218318_s_at | -0.14541876 | -2.59002835 | 0.012090208 | 0.040740073 |
| 218319_at   | -0.30137654 | -3.62410553 | 0.000608063 | 0.003374586 |
| 218320_s_at | -0.16783364 | -3.29748402 | 0.001661588 | 0.007802845 |
| 218321_x_at | 0.06007869  | 1.237386027 | 0.220882047 | 0.387781805 |
| 218322_s_at | 0.154372437 | 2.252310826 | 0.028065344 | 0.080703663 |
| 218323_at   | -0.16000136 | -2.23860933 | 0.028995691 | 0.08289027  |
| 218324_s_at | -0.18506213 | -4.52992421 | 2.96E-05    | 0.000265033 |
| 218325_s_at | 0.136675291 | 2.766987801 | 0.007559416 | 0.027746832 |
| 218326_s_at | 0.335686646 | 3.97869057  | 0.000193306 | 0.001279337 |
| 218327_s_at | -0.04119064 | -0.74118477 | 0.461543076 | 0.639764381 |
| 218328_at   | 0.069201219 | 1.278864889 | 0.205988911 | 0.369360577 |
| 218329_at   | -0.02171399 | -0.67466924 | 0.502540623 | 0.674724233 |
| 218330_s_at | 0.455127134 | 4.614957491 | 2.19E-05    | 0.000206394 |
| 218331_s_at | 0.007017122 | 0.097816605 | 0.922411923 | 0.95939942  |
| 218332_at   | -0.72982051 | -5.63808579 | 5.21E-07    | 9.37E-06    |
| 218333_at   | 0.159217795 | 3.325650301 | 0.001526743 | 0.007268131 |
| 218334_at   | -0.38342591 | -4.5632042  | 2.63E-05    | 0.000240495 |

|             |             |             |             |             |
|-------------|-------------|-------------|-------------|-------------|
| 218335_x_at | 0.19773181  | 5.659593796 | 4.80E-07    | 8.76E-06    |
| 218336_at   | -0.17053376 | -2.69098425 | 0.009270109 | 0.032834014 |
| 218337_at   | 0.157973475 | 3.556938176 | 0.000750804 | 0.004027601 |
| 218338_at   | 0.068720561 | 1.254561393 | 0.214621756 | 0.380358296 |
| 218339_at   | -0.09528021 | -1.78903206 | 0.078781186 | 0.181404954 |
| 218340_s_at | 0.03617953  | 0.461737887 | 0.64597985  | 0.785161905 |
| 218341_at   | -0.02314783 | -0.38153663 | 0.704185852 | 0.825567905 |
| 218342_s_at | 0.011573039 | 0.197416724 | 0.844185014 | 0.914372314 |
| 218343_s_at | -0.09438928 | -1.55451986 | 0.125448177 | 0.258282118 |
| 218344_s_at | -0.05660535 | -0.85288453 | 0.397197958 | 0.57951068  |
| 218345_at   | 0.348323225 | 5.468987032 | 9.81E-07    | 1.57E-05    |
| 218346_s_at | -0.07504158 | -1.16211133 | 0.249904194 | 0.422321646 |
| 218347_at   | 0.170996379 | 3.666402125 | 0.00053189  | 0.003017419 |
| 218348_s_at | 0.020393935 | 0.465023584 | 0.643638976 | 0.783498407 |
| 218349_s_at | -0.08991172 | -2.77474227 | 0.007402277 | 0.027260643 |
| 218350_s_at | 0.643782256 | 3.764702061 | 0.000388506 | 0.002313922 |
| 218351_at   | -0.04088159 | -0.8963096  | 0.373756907 | 0.556853809 |
| 218352_at   | 0.376880424 | 3.547303877 | 0.000773728 | 0.004121014 |
| 218353_at   | 0.167152853 | 1.818399863 | 0.07411769  | 0.173039472 |
| 218354_at   | -0.19927197 | -2.71556987 | 0.008681387 | 0.031098795 |
| 218355_at   | 0.054192062 | 0.937704036 | 0.352247537 | 0.535518825 |
| 218356_at   | 0.006815516 | 0.14518667  | 0.885062006 | 0.938461191 |
| 218357_s_at | -0.08098864 | -1.61347427 | 0.112017363 | 0.237073447 |
| 218358_at   | 0.112793829 | 1.818714212 | 0.074069052 | 0.172974461 |
| 218359_at   | -0.18453654 | -3.89284757 | 0.000256356 | 0.001627657 |
| 218360_at   | 0.048204207 | 1.062716386 | 0.292273018 | 0.470729875 |
| 218361_at   | 0.173016204 | 3.660882368 | 0.000541287 | 0.00306295  |
| 218362_s_at | 0.018613535 | 0.47114027  | 0.639290844 | 0.780663115 |
| 218363_at   | -0.05708722 | -1.65540253 | 0.103192342 | 0.222871895 |
| 218364_at   | 0.222769235 | 4.132446152 | 0.000115746 | 0.000834073 |
| 218365_s_at | -0.07967471 | -1.5199815  | 0.13389631  | 0.270977388 |
| 218366_x_at | 0.202678427 | 6.103432035 | 8.91E-08    | 2.31E-06    |
| 218367_x_at | 0.090726032 | 2.086725614 | 0.041275702 | 0.109587933 |
| 218368_s_at | -0.02560541 | -0.486478   | 0.628443828 | 0.772769812 |
| 218369_s_at | 0.013369546 | 0.635313664 | 0.527698414 | 0.695574793 |
| 218370_s_at | -0.14391155 | -2.26992771 | 0.026907972 | 0.078053552 |
| 218371_s_at | -0.00288723 | -0.05454854 | 0.956683794 | 0.977796605 |
| 218372_at   | -0.0258481  | -0.69983629 | 0.486800157 | 0.661278803 |
| 218373_at   | 0.005979996 | 0.130713337 | 0.896450043 | 0.94449164  |
| 218374_s_at | -0.02133565 | -0.65751582 | 0.513425278 | 0.68407723  |
| 218375_at   | -0.05084696 | -1.04700443 | 0.299399423 | 0.478722015 |
| 218376_s_at | -0.04973958 | -0.82974555 | 0.410052048 | 0.592240091 |
| 218377_s_at | 0.052893075 | -1.70949332 | 0.092653741 | 0.20542893  |
| 218378_s_at | 0.072270434 | 2.16536098  | 0.03444547  | 0.095073921 |
| 218379_at   | 0.159352306 | 2.379713706 | 0.02060247  | 0.063048864 |
| 218380_at   | -0.12433046 | -1.7788266  | 0.080458074 | 0.184567031 |
| 218381_s_at | 0.108793839 | 1.939908089 | 0.057211259 | 0.141765667 |
| 218382_s_at | -0.01050654 | -0.33606742 | 0.738021109 | 0.847973865 |
| 218383_at   | 0.230999703 | 5.550295276 | 7.24E-07    | 1.22E-05    |
| 218384_at   | -0.15657224 | -3.60977826 | 0.000636148 | 0.003507368 |
| 218385_at   | -0.01071813 | -0.21833133 | 0.82792996  | 0.904431298 |
| 218386_x_at | 0.013596499 | 0.175337461 | 0.86141928  | 0.924490321 |
| 218387_s_at | 0.368506453 | 5.369181198 | 1.42E-06    | 2.13E-05    |
| 218388_at   | 0.24045182  | 4.951537973 | 6.58E-06    | 7.57E-05    |
| 218389_s_at | 0.25390986  | 4.892674132 | 8.14E-06    | 8.99E-05    |
| 218390_s_at | -0.04683561 | -2.10847383 | 0.039277853 | 0.105303287 |
| 218391_at   | -0.0755784  | -1.55142428 | 0.126187549 | 0.259457764 |
| 218392_x_at | 0.051386128 | 1.132699567 | 0.261956458 | 0.436454022 |
| 218393_s_at | 0.002357948 | 0.074599846 | 0.940787323 | 0.969151462 |
| 218394_at   | -0.28884668 | -3.85316759 | 0.000291791 | 0.001819045 |
| 218395_at   | -0.0161714  | -0.1616278  | 0.872155262 | 0.931071158 |
| 218396_at   | 0.314937408 | 4.058411397 | 0.000148337 | 0.001025126 |
| 218397_at   | 0.129524793 | 1.470189152 | 0.146862716 | 0.28974478  |
| 218398_at   | -0.1409418  | -2.22675503 | 0.029822474 | 0.084720698 |
| 218399_s_at | 0.001193903 | 0.038303557 | 0.969575924 | 0.984690433 |
| 218400_at   | -0.02328606 | -0.49083828 | 0.625375017 | 0.77046147  |
| 218401_s_at | 0.078110971 | 1.074862984 | 0.286844452 | 0.46490126  |
| 218402_s_at | -0.02804741 | -0.90104947 | 0.371252509 | 0.55448788  |
| 218403_at   | -0.12287434 | -3.19470697 | 0.002255043 | 0.010091795 |
| 218404_at   | -0.5153556  | -5.33871122 | 1.59E-06    | 2.35E-05    |
| 218405_at   | -0.03310446 | -1.14125542 | 0.258408713 | 0.432280364 |
| 218406_x_at | 0.001283334 | 0.029662711 | 0.976436903 | 0.988219005 |
| 218407_x_at | -0.17309309 | -4.02948139 | 0.000163345 | 0.001110635 |
| 218408_at   | -0.15531565 | -2.79372225 | 0.007030257 | 0.026143804 |
| 218409_s_at | 0.186882963 | 4.257731312 | 7.57E-05    | 0.00058391  |

|             |             |             |             |             |
|-------------|-------------|-------------|-------------|-------------|
| 218410_s_at | -0.02563167 | -0.6241241  | 0.534969749 | 0.701429781 |
| 218411_s_at | 0.044052915 | 1.250559154 | 0.216068689 | 0.382059024 |
| 218412_s_at | 0.031266115 | 1.135214081 | 0.260910234 | 0.435226939 |
| 218413_s_at | -0.02103218 | -0.89491121 | 0.374497813 | 0.557607767 |
| 218414_s_at | 0.450871346 | 6.840984956 | 5.19E-09    | 2.84E-07    |
| 218415_at   | -0.07542    | -1.97384165 | 0.053123003 | 0.133733637 |
| 218416_s_at | 0.118574558 | 1.855831402 | 0.0685113   | 0.163066891 |
| 218417_s_at | 0.191848752 | 2.355391845 | 0.021872696 | 0.066246578 |
| 218418_s_at | 0.510680626 | 6.98879822  | 2.92E-09    | 1.87E-07    |
| 218419_s_at | 0.071510477 | 2.446917153 | 0.017428863 | 0.055090937 |
| 218420_s_at | 0.027218392 | 0.832798308 | 0.408341806 | 0.590525886 |
| 218421_at   | 0.077838949 | 1.847035073 | 0.069795609 | 0.165348813 |
| 218422_s_at | 0.106736439 | 1.760216159 | 0.08359256  | 0.189833266 |
| 218423_x_at | 0.167382784 | 3.50044967  | 0.000895035 | 0.004649747 |
| 218424_s_at | 0.159570484 | 3.29835454  | 0.001657257 | 0.007791514 |
| 218425_at   | -0.0364774  | -0.85019488 | 0.398679172 | 0.580988964 |
| 218426_s_at | -0.04898284 | -1.75197679 | 0.085012336 | 0.192451187 |
| 218427_at   | 0.193857424 | 4.438113544 | 4.07E-05    | 0.000346856 |
| 218428_s_at | 0.007758921 | 0.106817417 | 0.915298893 | 0.954934709 |
| 218429_s_at | -0.05592435 | -1.7618123  | 0.083319809 | 0.189338938 |
| 218430_s_at | -0.02683346 | -1.1706179  | 0.246493641 | 0.418075666 |
| 218431_at   | -0.041025   | -1.20956905 | 0.23130428  | 0.39957678  |
| 218432_at   | -0.57046563 | -5.28427136 | 1.95E-06    | 2.78E-05    |
| 218433_at   | -0.00680516 | -0.27111115 | 0.787258829 | 0.878615847 |
| 218434_s_at | -0.26130384 | -4.20494575 | 9.06E-05    | 0.00067848  |
| 218435_at   | 0.275958319 | 4.037274452 | 0.000159164 | 0.001086837 |
| 218436_at   | 0.07899058  | 1.960794628 | 0.054664279 | 0.136850546 |
| 218437_s_at | 0.063994308 | 0.623898178 | 0.535117092 | 0.701559245 |
| 218438_s_at | 0.048253062 | 0.776572849 | 0.440535997 | 0.62092957  |
| 218439_s_at | -0.22193463 | -3.24229306 | 0.001959025 | 0.00895314  |
| 218440_at   | -0.0999415  | -2.2526112  | 0.028045247 | 0.080656252 |
| 218441_s_at | -0.04263946 | -1.13777866 | 0.259846237 | 0.433905419 |
| 218442_at   | 0.173587146 | 3.715483628 | 0.00045492  | 0.00264455  |
| 218443_s_at | 0.090208296 | 1.976885733 | 0.052768803 | 0.132976789 |
| 218444_at   | 0.015514006 | 0.376370113 | 0.708001836 | 0.827967924 |
| 218445_at   | -0.01055046 | -0.2872617  | 0.774925904 | 0.871065937 |
| 218446_s_at | 0.24231997  | 2.953557032 | 0.004516428 | 0.018151815 |
| 218447_at   | -0.0525008  | -0.98907454 | 0.326695484 | 0.50889389  |
| 218448_at   | 0.08809731  | 2.748228356 | 0.007952332 | 0.028939308 |
| 218449_at   | -0.11834558 | -1.41747696 | 0.161641918 | 0.310580422 |
| 218450_at   | -0.04402352 | -0.73000916 | 0.468294577 | 0.64527888  |
| 218451_at   | 0.117138017 | 3.050250723 | 0.003431594 | 0.014399098 |
| 218452_at   | 0.043501406 | 1.07704428  | 0.285877029 | 0.463720099 |
| 218453_s_at | -0.06387963 | -1.73624793 | 0.087778215 | 0.197303424 |
| 218454_at   | 0.055118224 | 1.402399509 | 0.166074552 | 0.317066251 |
| 218455_at   | -0.07192203 | -1.53221575 | 0.13085357  | 0.266525738 |
| 218456_at   | -0.32054814 | -4.26914464 | 7.28E-05    | 0.000565018 |
| 218457_s_at | -0.02175529 | -0.74082375 | 0.461760306 | 0.63996545  |
| 218458_at   | 0.078941198 | 1.359907828 | 0.179071355 | 0.334807312 |
| 218459_at   | 0.025961396 | 0.759523195 | 0.450586082 | 0.630028257 |
| 218460_at   | 0.247737478 | 5.632533781 | 5.32E-07    | 9.53E-06    |
| 218461_at   | -0.01441765 | -0.44237887 | 0.659844518 | 0.794358668 |
| 218462_at   | -0.50180385 | -5.84485334 | 2.39E-07    | 4.95E-06    |
| 218463_s_at | 0.091028289 | 3.390791683 | 0.001253416 | 0.006156086 |
| 218464_s_at | -0.09774916 | -2.77764162 | 0.0073443   | 0.027090743 |
| 218465_at   | 0.026565141 | 0.533382046 | 0.595787622 | 0.748578589 |
| 218466_at   | 0.105511624 | 2.650294128 | 0.010325224 | 0.035777244 |
| 218467_at   | 0.027706992 | 0.533788021 | 0.595508459 | 0.74837511  |
| 218468_s_at | -0.04295809 | -0.29187436 | 0.771414082 | 0.869158427 |
| 218469_at   | 0.173700556 | 0.900179729 | 0.371711249 | 0.554915962 |
| 218470_at   | -0.07863196 | -2.24657724 | 0.028451402 | 0.081635211 |
| 218471_s_at | -0.04906585 | -0.89823252 | 0.372739603 | 0.555856996 |
| 218472_s_at | -0.14012885 | -2.57291016 | 0.012639337 | 0.042233812 |
| 218473_s_at | 0.137625111 | 3.192157169 | 0.002272036 | 0.010145051 |
| 218474_s_at | 0.131403875 | 2.928066114 | 0.004851413 | 0.019249595 |
| 218475_at   | 0.064555733 | 1.647841052 | 0.104740601 | 0.225495783 |
| 218476_at   | 0.064994289 | 1.761501955 | 0.083372783 | 0.189420444 |
| 218477_at   | -0.42877605 | -5.29758967 | 1.85E-06    | 2.66E-05    |
| 218478_s_at | 0.232349042 | 4.637416832 | 2.02E-05    | 0.000193268 |
| 218479_s_at | 0.077403769 | 2.223138513 | 0.030078815 | 0.085318762 |
| 218480_at   | 0.0375206   | 1.500696479 | 0.138806309 | 0.278290965 |
| 218481_at   | -0.17239944 | -5.52989144 | 7.82E-07    | 1.31E-05    |
| 218482_at   | -0.11986708 | -2.38602607 | 0.020283774 | 0.062295384 |
| 218483_s_at | 0.066653293 | 1.344289643 | 0.184038806 | 0.341260572 |
| 218484_at   | 0.185400714 | 3.826795884 | 0.000317896 | 0.001953443 |

|             |             |             |             |             |
|-------------|-------------|-------------|-------------|-------------|
| 218485_s_at | -0.03103979 | -0.75284699 | 0.454557448 | 0.633663606 |
| 218486_at   | 0.279416043 | 4.625674235 | 2.11E-05    | 0.000200084 |
| 218487_at   | 0.230265335 | 4.038546031 | 0.000158492 | 0.001082908 |
| 218488_at   | -0.04783116 | -1.29907751 | 0.199008457 | 0.36050772  |
| 218489_s_at | -0.01256947 | -0.22529866 | 0.822531257 | 0.901391961 |
| 218490_s_at | 0.171958645 | 2.634253375 | 0.010770479 | 0.037010167 |
| 218491_s_at | -0.18522294 | -3.56203447 | 0.000738941 | 0.003971893 |
| 218492_s_at | 0.113373691 | 2.76272798  | 0.007647038 | 0.028001756 |
| 218493_at   | -0.18228811 | -3.11167174 | 0.002874483 | 0.012381217 |
| 218494_s_at | 0.208152522 | 4.394794565 | 4.73E-05    | 0.000392824 |
| 218495_at   | 0.179278331 | 2.756118299 | 0.007784845 | 0.028441128 |
| 218496_at   | 0.048919777 | 0.76200576  | 0.449114476 | 0.628546298 |
| 218497_s_at | -0.10565654 | -1.45062457 | 0.152219474 | 0.29730761  |
| 218498_s_at | -0.12344439 | -4.05654696 | 0.000149263 | 0.001029771 |
| 218499_at   | -0.54332536 | -6.63136772 | 1.17E-08    | 5.03E-07    |
| 218500_at   | -0.13792479 | -3.82452973 | 0.000320241 | 0.00196623  |
| 218501_at   | -0.09237358 | -1.04891387 | 0.298527071 | 0.4777104   |
| 218502_s_at | 0.444479647 | 5.005133426 | 5.42E-06    | 6.43E-05    |
| 218503_at   | -0.53593822 | -6.98445829 | 2.97E-09    | 1.90E-07    |
| 218504_at   | 0.189218696 | 2.433153446 | 0.018040569 | 0.05669567  |
| 218505_at   | 0.191258355 | 3.269156205 | 0.001808486 | 0.008382582 |
| 218506_x_at | 0.00697653  | 0.192431644 | 0.848069818 | 0.916464398 |
| 218507_at   | 0.172118188 | 1.024713705 | 0.309712256 | 0.490299085 |
| 218508_at   | 0.087443454 | 2.817771488 | 0.006583614 | 0.024745947 |
| 218509_at   | -0.26427503 | -5.15150131 | 3.18E-06    | 4.15E-05    |
| 218510_x_at | 0.213597985 | 2.5713516   | 0.012690441 | 0.04236973  |
| 218511_s_at | -0.020052   | -0.58763319 | 0.559037507 | 0.720720714 |
| 218512_at   | -0.1574833  | -4.9316869  | 7.07E-06    | 8.05E-05    |
| 218513_at   | 0.016539536 | 0.739994501 | 0.462259489 | 0.640340362 |
| 218514_at   | -0.02434992 | -0.64340303 | 0.522474055 | 0.691331433 |
| 218515_at   | 0.203940331 | 3.113511032 | 0.002859185 | 0.012333046 |
| 218516_s_at | -0.0778472  | -2.68179119 | 0.009499473 | 0.033466776 |
| 218517_at   | 0.265615482 | 5.70198541  | 4.09E-07    | 7.71E-06    |
| 218518_at   | -0.37888029 | -4.20745916 | 8.98E-05    | 0.000673284 |
| 218519_at   | 0.062260758 | 0.673735924 | 0.503129622 | 0.675271602 |
| 218520_at   | 0.021492072 | 0.68680434  | 0.494916565 | 0.668322792 |
| 218521_s_at | -0.16037875 | -2.48368158 | 0.015885361 | 0.05100938  |
| 218522_s_at | -0.42167143 | -5.87136508 | 2.16E-07    | 4.58E-06    |
| 218523_at   | 0.161197704 | 1.734128008 | 0.08815663  | 0.197865412 |
| 218524_at   | 0.122642685 | 2.740077922 | 0.008128818 | 0.029468942 |
| 218525_s_at | 0.039046333 | 1.149335701 | 0.255089664 | 0.428347446 |
| 218526_s_at | -0.17477933 | -3.61601817 | 0.000623767 | 0.003450174 |
| 218527_at   | 0.050874399 | 1.054668616 | 0.295908484 | 0.474804939 |
| 218528_s_at | 0.143375155 | 2.659049628 | 0.010089341 | 0.035150672 |
| 218529_at   | 0.008533523 | 0.220132733 | 0.826533316 | 0.903808343 |
| 218530_at   | -0.03149091 | -0.84617574 | 0.400898907 | 0.583177878 |
| 218531_at   | 0.103242174 | 2.585185321 | 0.012243324 | 0.041144344 |
| 218532_s_at | 0.246486203 | 2.273716824 | 0.026664633 | 0.077523796 |
| 218533_s_at | 0.234109521 | 4.030440287 | 0.000162825 | 0.001107604 |
| 218534_s_at | 0.025686615 | 0.419321425 | 0.676515332 | 0.805875133 |
| 218535_s_at | 0.077859672 | 2.23813538  | 0.029028355 | 0.08294734  |
| 218536_at   | -0.1505416  | -2.84254942 | 0.006150933 | 0.023399513 |
| 218537_at   | -0.34163435 | -6.97237008 | 3.12E-09    | 1.97E-07    |
| 218538_s_at | -0.00170131 | -0.04174856 | 0.96684115  | 0.983186527 |
| 218539_at   | -0.50391742 | -7.10449293 | 1.87E-09    | 1.39E-07    |
| 218540_at   | -0.12216017 | -2.72222951 | 0.008527924 | 0.030657175 |
| 218541_s_at | 0.130348751 | 3.565842627 | 0.000730193 | 0.003933995 |
| 218542_at   | -0.00834417 | -0.34641912 | 0.730269281 | 0.842715098 |
| 218543_s_at | 0.424289609 | 6.894054829 | 4.23E-09    | 2.46E-07    |
| 218544_s_at | 0.114038768 | 4.338455181 | 5.74E-05    | 0.000462852 |
| 218545_at   | -0.15509076 | -2.31696034 | 0.024022584 | 0.071459502 |
| 218546_at   | -0.76156798 | -6.58746326 | 1.39E-08    | 5.71E-07    |
| 218547_at   | -0.02048589 | -0.6667518  | 0.507549012 | 0.67871078  |
| 218548_x_at | 0.100347415 | 1.910019325 | 0.061031644 | 0.149026184 |
| 218549_s_at | -0.0037746  | -0.05331364 | 0.957663453 | 0.978305676 |
| 218550_s_at | -0.21246299 | -5.04183671 | 4.74E-06    | 5.77E-05    |
| 218551_at   | 0.092041795 | 2.05133655  | 0.044715442 | 0.116935197 |
| 218552_at   | 0.453126663 | 5.568068817 | 6.77E-07    | 1.16E-05    |
| 218553_s_at | 0.171660277 | 3.744011174 | 0.000415208 | 0.002448086 |
| 218554_s_at | -0.09959547 | -2.4501688  | 0.017287101 | 0.054712493 |
| 218555_at   | 0.129738922 | 3.651485356 | 0.00055765  | 0.003140828 |
| 218556_at   | 0.086931405 | 2.116009165 | 0.038605554 | 0.103918535 |
| 218557_at   | -0.3643816  | -4.75874234 | 1.32E-05    | 0.000134095 |
| 218558_s_at | 0.012208625 | 0.328154686 | 0.743965055 | 0.851726622 |
| 218559_s_at | 0.444211077 | 3.144604597 | 0.00261183  | 0.011417048 |

|             |             |             |             |             |
|-------------|-------------|-------------|-------------|-------------|
| 218560_s_at | 0.072620608 | 1.936640252 | 0.057618773 | 0.142487767 |
| 218561_s_at | -0.24817412 | -4.58940665 | 2.40E-05    | 0.000222459 |
| 218562_s_at | -0.00034383 | -0.01315909 | 0.989545593 | 0.995067312 |
| 218563_at   | -0.2788932  | -4.01422366 | 0.000171839 | 0.001159398 |
| 218564_at   | 0.029499805 | 1.271647479 | 0.208525166 | 0.37261777  |
| 218565_at   | 0.16427205  | 3.414020996 | 0.001167682 | 0.005798452 |
| 218566_s_at | 0.212548895 | 1.546413366 | 0.127391767 | 0.261206708 |
| 218567_x_at | 0.078776919 | 2.15745223  | 0.035084498 | 0.096444604 |
| 218568_at   | -0.2470992  | -6.73158582 | 7.93E-09    | 3.78E-07    |
| 218569_s_at | -0.01784162 | -0.60098989 | 0.550165736 | 0.713129936 |
| 218570_at   | -0.00938619 | -0.252036   | 0.801895619 | 0.888271568 |
| 218571_s_at | 0.075429813 | 1.67290369  | 0.099680405 | 0.217090622 |
| 218572_at   | -0.01567453 | -0.35457405 | 0.724182295 | 0.838818249 |
| 218573_at   | -0.10656047 | -1.61042133 | 0.112683106 | 0.238166629 |
| 218574_s_at | 0.235626374 | 4.34461706  | 5.62E-05    | 0.000454951 |
| 218575_at   | -0.06565552 | -1.69853707 | 0.094713676 | 0.208868752 |
| 218576_s_at | 0.102806906 | 2.135027188 | 0.036953206 | 0.100456976 |
| 218577_at   | -0.11084592 | -1.27560828 | 0.207130449 | 0.370876364 |
| 218578_at   | 0.130203654 | 2.716310205 | 0.008664203 | 0.031051905 |
| 218579_s_at | 0.011942771 | 0.353455761 | 0.725015961 | 0.83931196  |
| 218580_x_at | -0.01297426 | -0.30705469 | 0.759890895 | 0.861740447 |
| 218581_at   | 0.247151214 | 6.32952807  | 3.75E-08    | 1.18E-06    |
| 218582_at   | -0.06273271 | -1.33449897 | 0.187205738 | 0.34519944  |
| 218583_s_at | 0.011782915 | 0.26741712  | 0.790087507 | 0.880523835 |
| 218584_at   | 0.123309778 | 2.598166566 | 0.011836828 | 0.040003896 |
| 218585_s_at | 0.007560352 | 0.25793523  | 0.797361115 | 0.885072224 |
| 218586_at   | 0.047149657 | 1.29408931  | 0.200714436 | 0.362716008 |
| 218587_s_at | -0.0244159  | -0.53918591 | 0.591802512 | 0.745499686 |
| 218588_s_at | 0.074113342 | 2.612910043 | 0.011390065 | 0.038769594 |
| 218589_at   | 0.135017043 | 1.727700582 | 0.089312205 | 0.199816834 |
| 218590_at   | 0.033556285 | 0.641715535 | 0.523561638 | 0.692217161 |
| 218591_s_at | 0.003079809 | 0.099466523 | 0.921107555 | 0.958555835 |
| 218592_s_at | 0.128945471 | 2.5863554   | 0.01220617  | 0.041050355 |
| 218593_at   | 0.327962746 | 5.797207967 | 2.86E-07    | 5.74E-06    |
| 218594_at   | -0.00037931 | -0.01284942 | 0.989791603 | 0.995225124 |
| 218595_s_at | 0.028856883 | 1.052494862 | 0.296895751 | 0.475900637 |
| 218596_at   | -0.02626615 | -0.74503395 | 0.459230656 | 0.637765653 |
| 218597_s_at | -0.54298252 | -5.41871487 | 1.18E-06    | 1.83E-05    |
| 218598_at   | -0.01566592 | -0.64275149 | 0.522893831 | 0.691655963 |
| 218599_at   | 0.022366938 | 0.674421058 | 0.502697211 | 0.674853376 |
| 218600_at   | -0.15918323 | -2.87784414 | 0.005579826 | 0.021573541 |
| 218601_at   | 0.008482091 | 0.224453018 | 0.823186054 | 0.901778449 |
| 218602_s_at | 0.050308113 | 2.606763992 | 0.011574406 | 0.039304257 |
| 218603_at   | 0.296839348 | 4.042032227 | 0.000156662 | 0.001072377 |
| 218604_at   | -0.08066393 | -1.75938701 | 0.083734539 | 0.19006877  |
| 218605_at   | -0.12835097 | -2.38561433 | 0.020304426 | 0.062341675 |
| 218606_at   | 0.127367543 | 3.894375763 | 0.000255078 | 0.001620691 |
| 218607_s_at | -0.15686386 | -4.52802962 | 2.97E-05    | 0.000266636 |
| 218608_at   | -0.24639354 | -3.54980133 | 0.000767722 | 0.004097818 |
| 218609_s_at | -0.11320548 | -2.82068124 | 0.006531386 | 0.024574465 |
| 218610_s_at | 0.090462257 | 2.472872317 | 0.016325862 | 0.05213916  |
| 218611_at   | 0.496700892 | 4.185507084 | 9.68E-05    | 0.000716385 |
| 218612_s_at | 0.097483329 | 3.259257496 | 0.001862643 | 0.008598895 |
| 218613_at   | -0.80123351 | -6.19622826 | 6.25E-08    | 1.75E-06    |
| 218614_at   | 0.171495368 | 4.175563061 | 0.00010008  | 0.000737226 |
| 218615_s_at | 0.149003594 | 5.131023242 | 3.42E-06    | 4.41E-05    |
| 218616_at   | 0.10003426  | 2.415929628 | 0.018833186 | 0.058699544 |
| 218617_at   | 0.012173951 | 0.341730775 | 0.733776684 | 0.84485644  |
| 218618_s_at | 0.439282637 | 5.301218894 | 1.83E-06    | 2.63E-05    |
| 218619_s_at | 0.083194453 | 2.339643046 | 0.022732028 | 0.068298473 |
| 218620_s_at | 0.068104295 | 2.220435074 | 0.030271703 | 0.085718299 |
| 218621_at   | 0.072106923 | 1.486053046 | 0.142628713 | 0.283733751 |
| 218622_at   | 0.108371847 | 2.214548262 | 0.030695497 | 0.086671921 |
| 218623_at   | -1.18732835 | -6.91975112 | 3.82E-09    | 2.29E-07    |
| 218624_s_at | -0.0049592  | -0.10715847 | 0.915029502 | 0.954807244 |
| 218625_at   | 0.021245253 | 0.232038734 | 0.817316822 | 0.898006451 |
| 218626_at   | 0.054150449 | 0.7934234   | 0.430734017 | 0.611530375 |
| 218627_at   | 0.197083489 | 3.419368241 | 0.00114875  | 0.005717776 |
| 218628_at   | -0.07218256 | -1.08122905 | 0.284027384 | 0.461527085 |
| 218629_at   | 0.116138986 | 2.710583176 | 0.008797953 | 0.031428191 |
| 218630_at   | 0.152472855 | 3.808920549 | 0.000336849 | 0.002051296 |
| 218631_at   | -0.08711076 | -2.42076505 | 0.01860757  | 0.058089518 |
| 218632_at   | 0.034742246 | 0.907420917 | 0.367902906 | 0.551071377 |
| 218633_x_at | -0.1149987  | -2.4465509  | 0.017444896 | 0.05512602  |
| 218634_at   | 0.225611659 | 5.431092933 | 1.13E-06    | 1.76E-05    |



|             |             |             |             |             |
|-------------|-------------|-------------|-------------|-------------|
| 218636_s_at | 0.115150842 | 3.473506524 | 0.000972766 | 0.004980805 |
| 218637_at   | 0.08364091  | 1.638128958 | 0.106756912 | 0.228592368 |
| 218638_s_at | -0.0922875  | -2.18096998 | 0.033214132 | 0.092395668 |
| 218639_s_at | 0.100487593 | 3.309377516 | 0.001603332 | 0.007575441 |
| 218640_s_at | 0.354804171 | 4.942031302 | 6.81E-06    | 7.79E-05    |
| 218641_at   | -0.21235432 | -2.59017374 | 0.012085639 | 0.040730817 |
| 218642_s_at | -0.08575014 | -1.65031902 | 0.104231151 | 0.224712908 |
| 218643_s_at | 0.080047111 | 1.179818962 | 0.242842446 | 0.413499242 |
| 218644_at   | 0.013508826 | 0.440503007 | 0.661194481 | 0.795405338 |
| 218645_at   | -0.00465358 | -0.15408547 | 0.878072084 | 0.934708403 |
| 218646_at   | 0.005321434 | 0.069682978 | 0.944683377 | 0.971451783 |
| 218647_s_at | 0.02219393  | 0.563289659 | 0.575388017 | 0.732853969 |
| 218648_at   | 0.132247341 | 2.749318465 | 0.007928996 | 0.028878006 |
| 218649_x_at | 0.102547435 | 1.356819247 | 0.180045496 | 0.336185224 |
| 218650_at   | 0.183315874 | 4.717226295 | 1.53E-05    | 0.00015214  |
| 218651_s_at | -0.18908799 | -2.47405649 | 0.016277073 | 0.05201866  |
| 218652_s_at | 0.238358778 | 3.542463943 | 0.000785493 | 0.004168777 |
| 218653_at   | 0.025190825 | 0.577869641 | 0.565567417 | 0.725975092 |
| 218654_s_at | -0.3113646  | -5.45174802 | 1.05E-06    | 1.66E-05    |
| 218655_s_at | 0.073462442 | 2.431874982 | 0.018098356 | 0.056837308 |
| 218656_s_at | 0.410280522 | 4.646588643 | 1.96E-05    | 0.000187865 |
| 218657_at   | -0.40564915 | -5.53458033 | 7.68E-07    | 1.29E-05    |
| 218658_s_at | 0.082186655 | 2.666838258 | 0.009883654 | 0.034548018 |
| 218659_at   | 0.210750639 | 3.974613554 | 0.000195928 | 0.001294562 |
| 218660_at   | 0.315761713 | 4.301179506 | 6.53E-05    | 0.000514052 |
| 218661_at   | -0.05058517 | -1.23890605 | 0.220322649 | 0.387302019 |
| 218662_s_at | -0.03102456 | -1.00150222 | 0.320704096 | 0.502485888 |
| 218663_at   | 0.016219894 | 0.72969534  | 0.468484967 | 0.645426817 |
| 218664_at   | -0.2167523  | -5.61787886 | 5.62E-07    | 9.93E-06    |
| 218665_at   | 0.086025592 | 2.14629933  | 0.036003284 | 0.098431441 |
| 218666_s_at | 0.012300363 | 0.299405343 | 0.765690763 | 0.865420874 |
| 218667_at   | -0.55590981 | -7.08630513 | 2.00E-09    | 1.46E-07    |
| 218668_s_at | 0.223202374 | 3.827226371 | 0.000317452 | 0.00195179  |
| 218669_at   | -0.01093598 | -0.27289738 | 0.785892066 | 0.87790348  |
| 218670_at   | -0.09460389 | -1.64030352 | 0.106302735 | 0.22788361  |
| 218671_s_at | -0.36745601 | -4.24154081 | 8.00E-05    | 0.000610706 |
| 218672_at   | 0.066007023 | 2.454138496 | 0.01711544  | 0.05426912  |
| 218673_s_at | 0.033799832 | 0.979069483 | 0.331572783 | 0.5141259   |
| 218674_at   | -0.23134261 | -4.09004339 | 0.000133452 | 0.000939992 |
| 218675_at   | -0.25748014 | -4.30774717 | 6.38E-05    | 0.00050422  |
| 218676_s_at | 0.130329598 | 2.639173496 | 0.01063208  | 0.036633175 |
| 218677_at   | -0.03462731 | -0.6794607  | 0.499522725 | 0.672267816 |
| 218678_at   | 0.266694245 | 4.276032718 | 7.11E-05    | 0.000553128 |
| 218679_s_at | 0.089734058 | 1.26708884  | 0.210139029 | 0.374791822 |
| 218680_x_at | 0.141531219 | 2.56821404  | 0.01279389  | 0.042641849 |
| 218681_s_at | 0.168949771 | 2.904478202 | 0.005181788 | 0.020291287 |
| 218682_s_at | -0.25799389 | -3.47535017 | 0.000967249 | 0.004959647 |
| 218683_at   | 0.045185598 | 0.562451458 | 0.575955106 | 0.733283224 |
| 218684_at   | 0.082970507 | 1.218879377 | 0.22776773  | 0.395285969 |
| 218685_s_at | -0.05428346 | -1.77292674 | 0.081440991 | 0.186243706 |
| 218686_s_at | 0.161848334 | 3.626597581 | 0.0006033   | 0.003352318 |
| 218687_s_at | -0.01477032 | -0.3471314  | 0.729736924 | 0.842375313 |
| 218688_at   | 0.041532652 | 1.261033692 | 0.212297003 | 0.377382847 |
| 218689_at   | 0.070549848 | 2.125849367 | 0.037742733 | 0.10217207  |
| 218690_at   | -0.04078235 | -0.90178338 | 0.370865691 | 0.554079343 |
| 218691_s_at | 0.044060002 | 0.801942299 | 0.425828354 | 0.607266371 |
| 218692_at   | -0.34851149 | -4.20870706 | 8.95E-05    | 0.000670665 |
| 218693_at   | 0.088939799 | 1.298442658 | 0.199224972 | 0.360730478 |
| 218694_at   | -0.18341283 | -2.71524504 | 0.008688937 | 0.031120851 |
| 218695_at   | -0.09276477 | -2.34186467 | 0.02260901  | 0.068004142 |
| 218696_at   | 0.154606902 | 2.335777234 | 0.022947513 | 0.068844078 |
| 218697_at   | -0.06511765 | -1.21862933 | 0.227870994 | 0.395357369 |
| 218698_at   | 0.099950143 | 1.387615809 | 0.170511308 | 0.323148645 |
| 218699_at   | 0.526071154 | 6.690840719 | 9.29E-09    | 4.25E-07    |
| 218700_s_at | 0.398140105 | 4.119039987 | 0.000121083 | 0.000867218 |
| 218701_at   | 0.046858953 | 0.690182014 | 0.492805824 | 0.666501658 |
| 218702_at   | -0.07516458 | -2.28559233 | 0.025914566 | 0.075856859 |
| 218703_at   | -0.0083412  | -0.35092273 | 0.726905524 | 0.840518636 |
| 218704_at   | 0.070279007 | 2.037619983 | 0.046113891 | 0.119800151 |
| 218705_s_at | 0.122617696 | 2.320755727 | 0.023802202 | 0.070950977 |
| 218706_s_at | 0.797411499 | 6.152443342 | 7.39E-08    | 1.99E-06    |
| 218707_at   | 0.006734163 | 0.127328414 | 0.899116649 | 0.946024138 |
| 218708_at   | 0.084177564 | 2.085901009 | 0.041353159 | 0.109741428 |
| 218709_s_at | 0.032392792 | 0.765209523 | 0.4472195   | 0.626929328 |
| 218710_at   | 0.053136227 | 1.880392758 | 0.065030287 | 0.156641887 |

|             |             |             |             |             |
|-------------|-------------|-------------|-------------|-------------|
| 218711_s_at | -0.00942916 | -0.20838404 | 0.83565214  | 0.909238355 |
| 218712_at   | -0.0574125  | -1.61531043 | 0.111618492 | 0.236565355 |
| 218713_at   | 0.139903605 | 2.930357845 | 0.004820379 | 0.019141036 |
| 218714_at   | 0.173311234 | 4.330588666 | 5.90E-05    | 0.000472724 |
| 218715_at   | 0.061239837 | 1.639600658 | 0.106449361 | 0.228108691 |
| 218716_x_at | 0.040327312 | 0.944238067 | 0.348927216 | 0.532039072 |
| 218717_s_at | 0.204993222 | 4.082088798 | 0.000137054 | 0.000961418 |
| 218718_at   | 0.223961346 | 3.690895442 | 0.000492042 | 0.002826522 |
| 218719_s_at | -0.07469806 | -1.38794205 | 0.170412424 | 0.323043437 |
| 218720_x_at | -0.66749959 | -5.6704181  | 4.61E-07    | 8.48E-06    |
| 218721_s_at | 0.213551973 | 3.699035312 | 0.000479443 | 0.002764098 |
| 218722_s_at | -0.05699657 | -1.60228079 | 0.114473927 | 0.241039753 |
| 218723_s_at | 0.34265023  | 3.762947654 | 0.000390705 | 0.002324775 |
| 218724_s_at | 0.115941882 | 4.195877856 | 9.34E-05    | 0.000695349 |
| 218725_at   | -0.37008144 | -5.30880984 | 1.78E-06    | 2.58E-05    |
| 218726_at   | 0.007079136 | 0.153958462 | 0.878171784 | 0.934770003 |
| 218727_at   | 0.001800338 | 0.046988905 | 0.962681936 | 0.980994217 |
| 218728_s_at | 0.107112428 | 2.049141651 | 0.044936723 | 0.117349071 |
| 218729_at   | -0.03828655 | -0.86383953 | 0.391200179 | 0.57400172  |
| 218730_s_at | -0.01720741 | -0.57839928 | 0.56521223  | 0.725604372 |
| 218731_s_at | 0.222316544 | 2.770401949 | 0.007489857 | 0.027530394 |
| 218732_at   | -0.04456174 | -0.9722422  | 0.33492855  | 0.517710733 |
| 218733_at   | 0.343566797 | 7.938574387 | 7.29E-11    | 1.78E-08    |
| 218734_at   | 0.089602345 | 2.479456022 | 0.016056269 | 0.051454667 |
| 218735_s_at | 0.088284776 | 2.303521174 | 0.024817601 | 0.073288506 |
| 218736_s_at | 0.191448238 | 2.86383548  | 0.005800362 | 0.022269936 |
| 218737_at   | -0.01321514 | -0.56789421 | 0.572277626 | 0.730551893 |
| 218738_s_at | 0.284996758 | 3.260115208 | 0.00185789  | 0.008583604 |
| 218739_at   | 0.084740545 | 2.161055617 | 0.034792067 | 0.095824099 |
| 218740_s_at | 0.134663898 | 2.620010579 | 0.011180426 | 0.038175232 |
| 218741_at   | 0.056426381 | 1.896323587 | 0.062853407 | 0.15252454  |
| 218742_at   | 0.075894603 | 1.803784981 | 0.076408728 | 0.17711005  |
| 218743_at   | -0.00921055 | -0.23759392 | 0.813025288 | 0.894977832 |
| 218744_s_at | 0.192373724 | 3.175854141 | 0.002383557 | 0.010558623 |
| 218745_x_at | 0.053109799 | 1.620947103 | 0.110401214 | 0.234563481 |
| 218746_at   | 0.094996037 | 2.129355663 | 0.037439381 | 0.101488495 |
| 218747_s_at | 0.10771883  | 2.490593668 | 0.015609327 | 0.050263855 |
| 218748_s_at | -0.22470157 | -2.11631092 | 0.038578842 | 0.103859142 |
| 218749_s_at | 0.056025115 | 1.552735554 | 0.12587393  | 0.259063214 |
| 218750_at   | 0.238897918 | 4.195679764 | 9.35E-05    | 0.000695628 |
| 218751_s_at | -0.23702983 | -2.81431326 | 0.006646188 | 0.024937573 |
| 218752_at   | 0.063515085 | 2.094759595 | 0.040527622 | 0.107999553 |
| 218753_at   | 0.078833435 | 2.839500763 | 0.006202715 | 0.023554226 |
| 218754_at   | -0.02850071 | -0.86353849 | 0.391364237 | 0.57416499  |
| 218755_at   | 0.005422717 | 0.143540748 | 0.886355885 | 0.939164447 |
| 218756_s_at | -0.38058896 | -4.92509459 | 7.24E-06    | 8.20E-05    |
| 218757_s_at | 0.035646299 | 0.564812966 | 0.57435811  | 0.732130078 |
| 218758_s_at | -0.02680999 | -0.62269165 | 0.53590433  | 0.702179376 |
| 218759_at   | 0.073228897 | 1.356193957 | 0.180243204 | 0.336455989 |
| 218760_at   | -0.1650052  | -5.56645868 | 6.82E-07    | 1.16E-05    |
| 218761_at   | -0.15450743 | -2.11527612 | 0.038670513 | 0.104030732 |
| 218762_at   | -0.02810395 | -0.55731528 | 0.579435907 | 0.736062463 |
| 218763_at   | 0.006188374 | 0.169379499 | 0.866081835 | 0.927645338 |
| 218764_at   | -0.56176448 | -5.7333566  | 3.64E-07    | 6.99E-06    |
| 218765_at   | 0.076499209 | 2.217034035 | 0.030515912 | 0.0862684   |
| 218766_s_at | 0.076901308 | 2.699605294 | 0.009059633 | 0.032221321 |
| 218767_at   | 0.030178436 | 1.013061611 | 0.315197831 | 0.496469355 |
| 218768_at   | 0.139491371 | 2.293865134 | 0.025403165 | 0.07463307  |
| 218769_s_at | 0.013013023 | 0.333016719 | 0.740310876 | 0.849294701 |
| 218770_s_at | -0.06294846 | -1.7948689  | 0.077835297 | 0.179717663 |
| 218771_at   | -0.23167123 | -3.9661277  | 0.000201496 | 0.001325866 |
| 218772_x_at | -0.00432039 | -0.07232164 | 0.942592366 | 0.970317587 |
| 218773_s_at | -0.04462144 | -0.75364822 | 0.454079765 | 0.633308352 |
| 218774_at   | 0.031656803 | 0.933357201 | 0.354467743 | 0.537559293 |
| 218775_s_at | 0.146474693 | 2.704148395 | 0.008950486 | 0.031876256 |
| 218776_s_at | 0.061280333 | 2.041497754 | 0.045714759 | 0.118991497 |
| 218777_at   | 0.115370342 | 3.306831243 | 0.001615639 | 0.007626901 |
| 218778_x_at | -0.01667504 | -0.42906997 | 0.66944655  | 0.800899015 |
| 218779_x_at | 0.006886119 | 0.174403243 | 0.862150052 | 0.92498584  |
| 218780_at   | 0.087059344 | 2.491919857 | 0.015556863 | 0.050120194 |
| 218781_at   | 0.141924882 | 3.727407914 | 0.000437898 | 0.002558574 |
| 218782_s_at | -0.0434685  | -1.36417698 | 0.177731485 | 0.333019265 |
| 218783_at   | -0.16079396 | -2.77175325 | 0.007462488 | 0.027447414 |
| 218784_s_at | 0.019132936 | 0.487745912 | 0.627550778 | 0.772160878 |
| 218785_s_at | -0.19705286 | -4.0278115  | 0.000164254 | 0.001115462 |

|             |             |             |             |             |
|-------------|-------------|-------------|-------------|-------------|
| 218786_at   | -0.14882743 | -3.1872895  | 0.002304809 | 0.010265933 |
| 218787_x_at | -0.03448526 | -1.18041293 | 0.242608093 | 0.4132734   |
| 218788_s_at | -0.4291827  | -5.23746831 | 2.32E-06    | 3.20E-05    |
| 218789_s_at | 0.039200334 | 0.818882236 | 0.416173333 | 0.598520356 |
| 218790_s_at | -0.03766644 | -0.95246485 | 0.344775808 | 0.527659763 |
| 218791_s_at | 0.241947719 | 5.045656662 | 4.68E-06    | 5.71E-05    |
| 218792_s_at | -0.49609122 | -7.24477659 | 1.08E-09    | 9.80E-08    |
| 218793_s_at | 0.007442315 | 0.13898081  | 0.889942117 | 0.94111242  |
| 218794_s_at | 0.156140548 | 3.945958043 | 0.00021535  | 0.001403182 |
| 218795_at   | 0.218498915 | 4.512853102 | 3.14E-05    | 0.000278216 |
| 218796_at   | -0.0230285  | -0.37791483 | 0.70686012  | 0.827292528 |
| 218797_s_at | 0.098296211 | 2.703514867 | 0.008965634 | 0.031922571 |
| 218798_at   | 0.050327204 | 1.222435434 | 0.22643988  | 0.393975596 |
| 218799_at   | -0.0654288  | -1.95458048 | 0.05541172  | 0.138290873 |
| 218800_at   | -0.0860315  | -3.31478797 | 0.001577473 | 0.007472225 |
| 218801_at   | 0.092641579 | 2.422357848 | 0.018533785 | 0.05789557  |
| 218802_at   | 0.204989506 | 3.389181718 | 0.001259574 | 0.006182632 |
| 218803_at   | 0.067425592 | 1.72403376  | 0.089977044 | 0.200851807 |
| 218804_at   | -0.00196228 | -0.09838987 | 0.921958694 | 0.95910701  |
| 218805_at   | 0.085950616 | 2.061548417 | 0.043698276 | 0.114785668 |
| 218806_s_at | -0.06414895 | -1.76264086 | 0.083178515 | 0.189104394 |
| 218807_at   | -0.1460884  | -3.62477646 | 0.000606777 | 0.003368196 |
| 218808_at   | 0.032102328 | 0.804212225 | 0.424526867 | 0.606005359 |
| 218809_at   | 0.151309423 | 3.056144813 | 0.00337405  | 0.01418561  |
| 218810_at   | 0.021968003 | 0.519376972 | 0.605455251 | 0.755468788 |
| 218811_at   | -0.06788489 | -1.74527287 | 0.086182236 | 0.194498636 |
| 218812_s_at | -0.1781252  | -4.32989506 | 5.91E-05    | 0.000473597 |
| 218813_s_at | -0.33513353 | -3.19812706 | 0.002232439 | 0.010003223 |
| 218814_s_at | -0.00672044 | -0.15713514 | 0.875678812 | 0.933249566 |
| 218815_s_at | 0.128889515 | 2.732605668 | 0.00829377  | 0.029969695 |
| 218816_at   | 0.391019625 | 4.72917584  | 1.46E-05    | 0.000146526 |
| 218817_at   | 0.019628531 | 0.660764347 | 0.511354314 | 0.682104113 |
| 218818_at   | -0.03250826 | -0.67337624 | 0.503356714 | 0.675495249 |
| 218819_at   | 0.186469225 | 2.747474793 | 0.0079685   | 0.028993585 |
| 218820_at   | -0.02417352 | -0.51210257 | 0.610505017 | 0.759490333 |
| 218821_at   | 0.033803728 | 0.853841069 | 0.396672003 | 0.579135826 |
| 218822_s_at | -0.0096981  | -0.26360716 | 0.793007936 | 0.882212199 |
| 218823_s_at | 0.192017358 | 3.11419598  | 0.002853507 | 0.012318067 |
| 218824_at   | -0.64000507 | -5.07095706 | 4.26E-06    | 5.29E-05    |
| 218825_at   | -0.0115871  | -0.22785563 | 0.820552101 | 0.900260575 |
| 218826_at   | 0.127564919 | 2.960774696 | 0.004425557 | 0.017837933 |
| 218827_s_at | 0.121010593 | 2.002508238 | 0.0498669   | 0.127205663 |
| 218828_at   | -0.00213491 | -0.06517394 | 0.948257469 | 0.973503384 |
| 218829_s_at | 0.377596077 | 5.66925429  | 4.63E-07    | 8.50E-06    |
| 218830_at   | -0.08982375 | -1.59899277 | 0.115203735 | 0.242120781 |
| 218831_s_at | 0.320356888 | 6.513263884 | 1.85E-08    | 6.98E-07    |
| 218832_x_at | 0.117792954 | 2.47327826  | 0.016309122 | 0.052097842 |
| 218833_at   | 0.069243345 | 2.18701968  | 0.032747383 | 0.091346028 |
| 218834_s_at | 0.197425597 | 3.919939372 | 0.000234581 | 0.001511298 |
| 218835_at   | -0.05950739 | -1.35177    | 0.181646727 | 0.338214204 |
| 218836_at   | -0.1591714  | -3.4538638  | 0.001033431 | 0.005238895 |
| 218837_s_at | -0.00407558 | -0.13380879 | 0.894012528 | 0.943396958 |
| 218838_s_at | 0.162390429 | 4.322953402 | 6.06E-05    | 0.00048286  |
| 218839_at   | -0.42127023 | -5.50605578 | 8.54E-07    | 1.40E-05    |
| 218840_s_at | 0.052892362 | 0.979982885 | 0.331125522 | 0.513649637 |
| 218841_at   | -0.09227172 | -1.66216715 | 0.101823108 | 0.220703155 |
| 218842_at   | 0.050649056 | 0.899057056 | 0.372303932 | 0.555496916 |
| 218843_at   | -0.09848678 | -2.29082681 | 0.025589936 | 0.075092935 |
| 218844_at   | 0.190782249 | 3.301894885 | 0.001639753 | 0.007727105 |
| 218845_at   | 0.174113292 | 4.10661682  | 0.00012624  | 0.000898683 |
| 218846_at   | 0.108684468 | 2.705727655 | 0.008912828 | 0.031773173 |
| 218847_at   | 0.333364914 | 5.298723691 | 1.85E-06    | 2.65E-05    |
| 218848_at   | 0.017027308 | 0.425626049 | 0.671940389 | 0.802521643 |
| 218849_s_at | 0.158695087 | 2.972447174 | 0.00428219  | 0.017361846 |
| 218850_s_at | 0.024310895 | 0.51056795  | 0.611572768 | 0.760313125 |
| 218851_s_at | 0.075753971 | 2.190600022 | 0.032473873 | 0.090740455 |
| 218852_at   | 0.130914133 | 1.442301771 | 0.154544    | 0.300612834 |
| 218853_s_at | 0.066830197 | 1.614817677 | 0.111725421 | 0.236662773 |
| 218854_at   | 0.434415521 | 4.083872718 | 0.000136238 | 0.000956597 |
| 218855_at   | 0.145755583 | 4.078870568 | 0.000138537 | 0.000969932 |
| 218856_at   | -0.18708236 | -2.65487579 | 0.010201168 | 0.035435302 |
| 218857_s_at | 0.094613664 | 1.607900995 | 0.113235112 | 0.23894913  |
| 218858_at   | 0.13844205  | 1.317862803 | 0.192681337 | 0.352273034 |
| 218859_s_at | 0.185162267 | 3.00792775  | 0.003872486 | 0.015964316 |
| 218860_at   | 0.034638871 | 1.050789114 | 0.297672041 | 0.476739067 |

|             |             |             |             |             |
|-------------|-------------|-------------|-------------|-------------|
| 218861_at   | -0.0417201  | -1.00185978 | 0.320532816 | 0.502318671 |
| 218862_at   | 0.034961061 | 0.827301848 | 0.411424226 | 0.593658074 |
| 218863_s_at | -0.03112278 | -0.75212149 | 0.45499023  | 0.634004407 |
| 218864_at   | 0.179378738 | 4.051997192 | 0.000151545 | 0.001042674 |
| 218865_at   | 0.012635733 | 0.361318419 | 0.719161639 | 0.835658128 |
| 218866_s_at | -0.28318552 | -5.65956896 | 4.80E-07    | 8.76E-06    |
| 218867_s_at | -5.15E-05   | -0.00120169 | 0.999045275 | 0.999548259 |
| 218868_at   | -1.00685071 | -6.43758177 | 2.47E-08    | 8.57E-07    |
| 218869_at   | 0.138674696 | 3.557515664 | 0.000749451 | 0.004021425 |
| 218870_at   | 0.091755921 | 1.874738104 | 0.06581816  | 0.158088097 |
| 218871_x_at | 0.159984032 | 2.408970462 | 0.019162202 | 0.059542315 |
| 218872_at   | -0.75559352 | -8.98331086 | 1.30E-12    | 2.64E-09    |
| 218873_at   | 0.056210372 | 1.582980529 | 0.11881162  | 0.247676147 |
| 218874_s_at | -0.06900704 | -1.91006085 | 0.06102619  | 0.149021007 |
| 218875_s_at | -0.01320419 | -0.65595447 | 0.514422245 | 0.684970144 |
| 218876_at   | 0.645509321 | 3.997242128 | 0.000181795 | 0.001216648 |
| 218877_s_at | -0.02829089 | -0.38644167 | 0.700570051 | 0.823066211 |
| 218878_s_at | 0.219817238 | 3.992205821 | 0.000184853 | 0.001233419 |
| 218879_s_at | 0.086966404 | 2.530826498 | 0.014086847 | 0.046112162 |
| 218880_at   | 0.061407643 | 1.090222109 | 0.280080671 | 0.457241408 |
| 218881_s_at | -0.01246895 | -0.25794013 | 0.797357353 | 0.885072224 |
| 218882_s_at | -0.06244725 | -1.79492678 | 0.077825964 | 0.179705398 |
| 218883_s_at | -0.02830103 | -0.86551118 | 0.390289947 | 0.57314092  |
| 218884_s_at | -0.08309964 | -2.71995207 | 0.008580123 | 0.030812604 |
| 218885_s_at | 0.053933266 | 2.164047925 | 0.034550853 | 0.09529822  |
| 218886_at   | 0.056633339 | 1.419879309 | 0.160944189 | 0.309652489 |
| 218887_at   | 0.015783419 | 0.547035424 | 0.586432854 | 0.741452335 |
| 218888_s_at | -1.14197674 | -6.44758373 | 2.38E-08    | 8.35E-07    |
| 218889_at   | 0.31998574  | 5.020479909 | 5.13E-06    | 6.14E-05    |
| 218890_x_at | -0.23078824 | -5.00976723 | 5.33E-06    | 6.34E-05    |
| 218891_at   | 0.005166978 | 0.157645654 | 0.875278295 | 0.933023364 |
| 218892_at   | 0.001987952 | 0.044790704 | 0.964426507 | 0.981736276 |
| 218893_at   | -0.00820192 | -0.27821575 | 0.78182664  | 0.875346697 |
| 218894_s_at | -0.07818659 | -2.6166501  | 0.0112792   | 0.038456669 |
| 218895_at   | -0.05447397 | -1.6974546  | 0.094919223 | 0.209181549 |
| 218896_s_at | 0.289978248 | 5.679842353 | 4.45E-07    | 8.24E-06    |
| 218897_at   | -0.15339914 | -3.42006929 | 0.001146289 | 0.005707436 |
| 218898_at   | 0.020672176 | 0.477323316 | 0.634908423 | 0.777423137 |
| 218899_s_at | 0.19698538  | 2.835632164 | 0.006269004 | 0.023757682 |
| 218900_at   | -0.04409524 | -1.64218448 | 0.105911147 | 0.227369631 |
| 218901_at   | 0.961551896 | 6.613140901 | 1.25E-08    | 5.31E-07    |
| 218902_at   | 0.531244049 | 9.177999571 | 6.18E-13    | 2.12E-09    |
| 218903_s_at | -0.14148364 | -3.29609697 | 0.00166851  | 0.007829047 |
| 218904_s_at | -0.03892318 | -1.4278426  | 0.158648047 | 0.306435238 |
| 218905_at   | 0.025687898 | 0.587835783 | 0.558902408 | 0.720602714 |
| 218906_x_at | -0.29628164 | -5.29566991 | 1.87E-06    | 2.67E-05    |
| 218907_s_at | 0.010663782 | 0.278481612 | 0.781623575 | 0.875189077 |
| 218908_at   | 0.013652583 | 0.369464499 | 0.713114069 | 0.831541575 |
| 218909_at   | -0.13075284 | -2.12290445 | 0.037999171 | 0.10266346  |
| 218910_at   | 0.037090029 | 0.822445488 | 0.414159432 | 0.596334074 |
| 218911_at   | -0.01742346 | -0.70071841 | 0.48625344  | 0.660925853 |
| 218912_at   | 0.073773217 | 2.10138341  | 0.039919744 | 0.106697758 |
| 218913_s_at | 0.021981721 | 0.469763976 | 0.640268101 | 0.781367515 |
| 218914_at   | 0.148421007 | 2.913197931 | 0.005057301 | 0.019903042 |
| 218915_at   | -0.07723095 | -1.5244949  | 0.132767325 | 0.269327462 |
| 218916_at   | 0.195552599 | 3.480080487 | 0.000953229 | 0.004899002 |
| 218917_s_at | 0.216850924 | 4.151755639 | 0.000108457 | 0.000789054 |
| 218918_at   | 0.168338962 | 1.559999198 | 0.124147946 | 0.256159741 |
| 218919_at   | -0.17279236 | -2.4541543  | 0.01711476  | 0.05426912  |
| 218920_at   | 0.16344347  | 3.306072825 | 0.001619322 | 0.007640493 |
| 218921_at   | 0.082748866 | 1.402410726 | 0.166071219 | 0.317066251 |
| 218922_s_at | 0.129281685 | 2.814444584 | 0.006643802 | 0.024930713 |
| 218923_at   | 0.077452736 | 1.523006754 | 0.133138733 | 0.269876463 |
| 218924_s_at | 0.199027714 | 3.062460128 | 0.003313394 | 0.013972657 |
| 218925_s_at | -0.026826   | -1.28296903 | 0.204556971 | 0.367638242 |
| 218926_at   | -0.02264919 | -0.69949334 | 0.487012795 | 0.66148723  |
| 218927_s_at | -0.00850873 | -0.20950212 | 0.834783333 | 0.908912629 |
| 218928_s_at | -0.10181008 | -2.7666792  | 0.007565733 | 0.027758618 |
| 218929_at   | 0.027728664 | 0.781680182 | 0.437551282 | 0.618037337 |
| 218930_s_at | 0.077226754 | 0.840397313 | 0.404103584 | 0.586388348 |
| 218931_at   | 0.003532815 | 0.10851775  | 0.913955941 | 0.954246988 |
| 218932_at   | 0.361565253 | 4.71861041  | 1.52E-05    | 0.00015146  |
| 218933_at   | 0.03139996  | 1.304732038 | 0.197087763 | 0.358015132 |
| 218934_s_at | 0.00839534  | 0.206099086 | 0.837428295 | 0.910318149 |
| 218935_at   | -0.17540265 | -3.33535945 | 0.001482707 | 0.007097047 |

|             |             |             |             |             |
|-------------|-------------|-------------|-------------|-------------|
| 218936_s_at | 0.143065287 | 2.903341723 | 0.00519822  | 0.020339596 |
| 218937_at   | 0.053312419 | 1.409366402 | 0.164014826 | 0.314099954 |
| 218938_at   | -0.36690904 | -4.94946051 | 6.63E-06    | 7.62E-05    |
| 218939_at   | 0.039506836 | 0.9875491   | 0.327436006 | 0.509763123 |
| 218940_at   | -0.26713585 | -3.06361577 | 0.003302406 | 0.013931576 |
| 218941_at   | -0.0732932  | -1.60298969 | 0.114317069 | 0.24075484  |
| 218942_at   | 0.022709682 | 0.496170529 | 0.62163116  | 0.767605333 |
| 218943_s_at | 0.034917917 | 1.229375354 | 0.223847387 | 0.391032966 |
| 218944_at   | 0.007652187 | 0.186846303 | 0.852426896 | 0.919044663 |
| 218945_at   | -0.07859024 | -1.99666546 | 0.050516267 | 0.128502056 |
| 218946_at   | -0.04687065 | -0.52219757 | 0.603502417 | 0.754243009 |
| 218947_s_at | -0.01404558 | -0.30798264 | 0.759188235 | 0.861347428 |
| 218948_at   | -0.04322914 | -0.77691137 | 0.440337794 | 0.620827469 |
| 218949_s_at | -0.06202565 | -1.36417989 | 0.177730576 | 0.333019265 |
| 218950_at   | 0.032525134 | 0.760667502 | 0.449907416 | 0.62935498  |
| 218951_s_at | -0.29145082 | -2.97515689 | 0.004249531 | 0.017246644 |
| 218952_at   | -0.70943317 | -5.74522958 | 3.48E-07    | 6.75E-06    |
| 218953_s_at | -0.17909771 | -3.9652796  | 0.000202061 | 0.001328213 |
| 218954_s_at | -0.04779208 | -1.21963238 | 0.227493204 | 0.394977906 |
| 218955_at   | -0.02028659 | -0.69226708 | 0.49150532  | 0.665559661 |
| 218956_s_at | 0.044951922 | 1.135522316 | 0.260782189 | 0.435094546 |
| 218957_s_at | 0.20156133  | 3.210131002 | 0.002154774 | 0.009704845 |
| 218958_at   | -0.06720152 | -1.15775488 | 0.251663872 | 0.424588968 |
| 218959_at   | 0.402631246 | 5.951496916 | 1.59E-07    | 3.61E-06    |
| 218960_at   | 0.022072693 | 0.383710873 | 0.702582233 | 0.824401522 |
| 218961_s_at | -0.05098226 | -1.29431616 | 0.200636618 | 0.362669005 |
| 218962_s_at | -0.01451377 | -0.20674629 | 0.836925121 | 0.910025243 |
| 218963_s_at | -0.04867961 | -0.79476352 | 0.429960075 | 0.610872306 |
| 218964_at   | -0.01205238 | -0.32945784 | 0.742985057 | 0.851078087 |
| 218965_s_at | 0.045399609 | 0.92228366  | 0.360164572 | 0.54334093  |
| 218966_at   | 0.1437701   | 1.917764291 | 0.060021434 | 0.147089868 |
| 218967_s_at | 0.06043584  | 1.494114544 | 0.140514274 | 0.280777248 |
| 218968_s_at | -0.09204115 | -3.10605239 | 0.002921698 | 0.012546991 |
| 218969_at   | -0.1913481  | -4.34151742 | 5.68E-05    | 0.000458831 |
| 218970_s_at | 0.031929664 | 0.551715166 | 0.583242623 | 0.738986741 |
| 218971_s_at | 0.036711488 | 0.893491025 | 0.375251224 | 0.558311435 |
| 218972_at   | 0.032450032 | 0.598396861 | 0.551882494 | 0.71446418  |
| 218973_at   | 0.137891889 | 4.201054596 | 9.18E-05    | 0.000685312 |
| 218974_at   | -0.02799276 | -0.5308184  | 0.597551891 | 0.749846669 |
| 218975_at   | -0.11846616 | -2.05842653 | 0.044007088 | 0.11540015  |
| 218976_at   | -0.60891192 | -6.99610017 | 2.84E-09    | 1.84E-07    |
| 218977_s_at | 0.061836743 | 1.457333916 | 0.150365528 | 0.294792273 |
| 218978_s_at | -0.11961504 | -3.21373397 | 0.002131964 | 0.009617617 |
| 218979_at   | 0.255486929 | 5.91307327  | 1.84E-07    | 4.05E-06    |
| 218980_at   | 0.080351468 | 1.223044316 | 0.226211549 | 0.393740914 |
| 218981_at   | 0.024527144 | 0.971060286 | 0.335511758 | 0.518309378 |
| 218982_s_at | -0.16052558 | -2.59443001 | 0.011952558 | 0.040346204 |
| 218983_at   | 0.081003657 | 1.60758403  | 0.113304688 | 0.239073374 |
| 218984_at   | -0.07107015 | -1.16297607 | 0.249555958 | 0.422004422 |
| 218985_at   | 0.048901078 | 1.105750879 | 0.273356005 | 0.449395864 |
| 218986_s_at | 0.073289426 | 2.46640137  | 0.016594805 | 0.052868594 |
| 218987_at   | -0.03441192 | -1.22651704 | 0.224912496 | 0.392173122 |
| 218988_at   | 0.08851928  | 1.240632766 | 0.219688452 | 0.386578325 |
| 218989_x_at | -0.10370945 | -1.49355465 | 0.140660325 | 0.280934266 |
| 218990_s_at | -0.00172453 | -0.04510897 | 0.964173912 | 0.981590936 |
| 218991_at   | 0.107391598 | 2.362761514 | 0.02148062  | 0.065266969 |
| 218992_at   | 0.066962442 | 1.517028169 | 0.134639173 | 0.272161152 |
| 218993_at   | -0.05778411 | -1.39452039 | 0.168427953 | 0.320367398 |
| 218994_s_at | -0.16231451 | -3.45711605 | 0.001023145 | 0.00519736  |
| 218995_s_at | 0.210575888 | 2.335911789 | 0.022939982 | 0.068830726 |
| 218996_at   | -0.08764794 | -1.40311002 | 0.165863582 | 0.316771729 |
| 218997_at   | 0.098713673 | 2.457221508 | 0.016983182 | 0.053914787 |
| 218998_at   | -0.17138289 | -4.60246995 | 2.29E-05    | 0.000214058 |
| 218999_at   | 0.177465083 | 2.332579055 | 0.023127156 | 0.069280707 |
| 219000_s_at | -0.00466867 | -0.1176646  | 0.906736027 | 0.950438504 |
| 219001_s_at | -0.06343742 | -1.51698722 | 0.134649495 | 0.272161152 |
| 219002_at   | -0.04636784 | -0.74867749 | 0.457047921 | 0.63597478  |
| 219003_s_at | 0.05262395  | 1.788282673 | 0.078903319 | 0.181639391 |
| 219004_s_at | -0.14288548 | -3.94736952 | 0.000214352 | 0.001398103 |
| 219005_at   | -0.49016748 | -7.44286218 | 5.01E-10    | 5.83E-08    |
| 219006_at   | -0.21589507 | -5.12689076 | 3.48E-06    | 4.47E-05    |
| 219007_at   | 0.279243481 | 5.152337406 | 3.17E-06    | 4.14E-05    |
| 219008_at   | -0.19807136 | -4.10830129 | 0.000125529 | 0.00089433  |
| 219009_at   | 0.096461849 | 2.643380439 | 0.010515031 | 0.036313867 |
| 219010_at   | 0.09873854  | 2.995784277 | 0.004008413 | 0.016420164 |

|             |             |             |             |             |
|-------------|-------------|-------------|-------------|-------------|
| 219011_at   | 0.076495104 | 1.504895681 | 0.137725243 | 0.276701127 |
| 219012_s_at | 0.034982137 | 1.300899619 | 0.198388008 | 0.359573236 |
| 219013_at   | -0.1936381  | -2.55729933 | 0.013159751 | 0.043627    |
| 219014_at   | 0.207709644 | 2.196942083 | 0.031994314 | 0.089676379 |
| 219015_s_at | -0.12246612 | -3.03201352 | 0.003615499 | 0.015043653 |
| 219016_at   | -0.07492274 | -1.55464403 | 0.125418591 | 0.2582331   |
| 219017_at   | -0.01046663 | -0.30877901 | 0.758585383 | 0.86112413  |
| 219018_s_at | -0.0174907  | -0.67094837 | 0.504891016 | 0.67676172  |
| 219019_at   | 0.114793942 | 4.106329811 | 0.000126362 | 0.000899406 |
| 219020_at   | 0.123059512 | 3.524047614 | 0.000831839 | 0.004371143 |
| 219021_at   | -0.07210612 | -1.6681952  | 0.1006155   | 0.218594522 |
| 219022_at   | -0.19541503 | -4.66848256 | 1.81E-05    | 0.000175665 |
| 219023_at   | -0.39868033 | -5.88777424 | 2.03E-07    | 4.37E-06    |
| 219024_at   | -0.13181808 | -2.1608765  | 0.034806553 | 0.095845623 |
| 219025_at   | 0.079040163 | 1.799658969 | 0.077066146 | 0.178347152 |
| 219026_s_at | -0.08706345 | -2.60571316 | 0.011606194 | 0.039388262 |
| 219027_s_at | -0.11820912 | -1.8538061  | 0.068805226 | 0.163548726 |
| 219028_at   | 0.607456553 | 5.495763043 | 8.88E-07    | 1.45E-05    |
| 219029_at   | 0.128974241 | 3.393682175 | 0.001242432 | 0.006115283 |
| 219030_at   | -0.09384219 | -1.4734242  | 0.145991386 | 0.288509707 |
| 219031_s_at | 0.022451088 | 1.09351537  | 0.278644989 | 0.455493849 |
| 219032_x_at | -0.19838982 | -2.34021814 | 0.022700126 | 0.06822097  |
| 219033_at   | 0.048997176 | 1.378064481 | 0.173425852 | 0.327118602 |
| 219034_at   | 0.092619372 | 2.264539736 | 0.027257376 | 0.078831724 |
| 219035_s_at | -0.084035   | -1.68696907 | 0.096929331 | 0.212538792 |
| 219036_at   | 0.093819365 | 2.529048241 | 0.014151193 | 0.046275342 |
| 219037_at   | 0.06473304  | 1.816700127 | 0.074381147 | 0.173539736 |
| 219038_at   | 0.216254572 | 6.485162499 | 2.06E-08    | 7.54E-07    |
| 219039_at   | 0.116868074 | 3.364712975 | 0.001356759 | 0.006583026 |
| 219040_at   | -0.14548399 | -2.59842269 | 0.011828933 | 0.039982515 |
| 219041_s_at | 0.139728562 | 2.992586532 | 0.004044939 | 0.016542496 |
| 219042_at   | -0.44812369 | -7.33930011 | 7.49E-10    | 7.73E-08    |
| 219043_s_at | 0.192511495 | 3.798843327 | 0.000348007 | 0.002107187 |
| 219044_at   | 0.127290513 | 1.977262571 | 0.052725097 | 0.132919113 |
| 219045_at   | -0.07350561 | -1.49468057 | 0.140366747 | 0.280557721 |
| 219046_s_at | -0.06098688 | -1.59915269 | 0.115168153 | 0.242090923 |
| 219047_s_at | 0.013898727 | 0.376348854 | 0.708017554 | 0.827967924 |
| 219048_at   | -0.00554494 | -0.16236338 | 0.871578599 | 0.930722325 |
| 219049_at   | 0.495151954 | 4.420654124 | 4.32E-05    | 0.00036454  |
| 219050_s_at | -0.01321627 | -0.26110755 | 0.794925569 | 0.883399979 |
| 219051_x_at | 0.035519605 | 0.521028941 | 0.604311161 | 0.75476831  |
| 219052_at   | -0.01756297 | -0.44807469 | 0.655752511 | 0.791572286 |
| 219053_s_at | -0.02528802 | -0.54174518 | 0.590049234 | 0.744244749 |
| 219054_at   | 0.075858186 | 2.122333899 | 0.038049029 | 0.10277009  |
| 219055_at   | 0.079140121 | 2.34726746  | 0.022312314 | 0.067263536 |
| 219056_at   | -0.22671465 | -5.63204678 | 5.33E-07    | 9.54E-06    |
| 219057_at   | 0.024550933 | 0.445930248 | 0.657291893 | 0.792610686 |
| 219058_x_at | 0.07618427  | 1.7455763   | 0.086128998 | 0.194407938 |
| 219059_s_at | 0.061610246 | 1.076356908 | 0.286181639 | 0.464094763 |
| 219060_at   | 0.119750896 | 2.440269642 | 0.017721934 | 0.055831712 |
| 219061_s_at | -0.19889207 | -4.17377778 | 0.000100686 | 0.000741081 |
| 219062_s_at | 0.236831548 | 4.008534418 | 0.000175115 | 0.001177407 |
| 219063_at   | 0.079883894 | 2.29863042  | 0.025112672 | 0.073985524 |
| 219064_at   | 0.214793665 | 2.767934473 | 0.007540069 | 0.027682641 |
| 219065_s_at | -0.12311138 | -2.14931044 | 0.035753175 | 0.097861397 |
| 219066_at   | 0.099962757 | 3.236429172 | 0.001993419 | 0.009088022 |
| 219067_s_at | -0.17394426 | -3.84288238 | 0.000301717 | 0.001872567 |
| 219068_x_at | 0.024942147 | 0.57648955  | 0.566493452 | 0.726654176 |
| 219069_at   | -0.01396986 | -0.35149099 | 0.726481468 | 0.840332059 |
| 219070_s_at | 0.063653673 | 1.7436304   | 0.086470889 | 0.194972856 |
| 219071_x_at | 0.021330816 | 0.465537317 | 0.643273298 | 0.783345301 |
| 219072_at   | 0.062415762 | 1.363553743 | 0.177926609 | 0.333315002 |
| 219073_s_at | -0.2376976  | -4.84210241 | 9.76E-06    | 0.000104728 |
| 219074_at   | 0.05538668  | 1.700898956 | 0.094266451 | 0.208191157 |
| 219075_at   | 0.03484494  | 1.228479888 | 0.224180671 | 0.391293987 |
| 219076_s_at | 0.09169081  | 2.301711898 | 0.024926399 | 0.073551473 |
| 219077_s_at | 0.417304662 | 5.359151263 | 1.48E-06    | 2.20E-05    |
| 219078_at   | 0.017926394 | 0.357507122 | 0.721997342 | 0.837466406 |
| 219079_at   | -0.11288789 | -2.27429805 | 0.02662748  | 0.077446005 |
| 219080_s_at | -0.00708846 | -0.33201379 | 0.741064161 | 0.849766248 |
| 219081_at   | 0.034299318 | 0.598226547 | 0.551995348 | 0.714548185 |
| 219082_at   | 0.008377941 | 0.249935642 | 0.803511739 | 0.889413419 |
| 219083_at   | 0.067880878 | 1.838631612 | 0.071041432 | 0.167536471 |
| 219084_at   | 0.158637799 | 3.8805934   | 0.000266833 | 0.001682936 |
| 219085_s_at | 0.062925292 | 1.798273723 | 0.077287922 | 0.178710821 |

|             |             |             |             |             |
|-------------|-------------|-------------|-------------|-------------|
| 219086_at   | 0.054852907 | 1.919482202 | 0.059799296 | 0.146641984 |
| 219087_at   | -0.00799093 | -0.20553911 | 0.83786371  | 0.910469873 |
| 219088_s_at | -0.10598034 | -2.23452485 | 0.029278252 | 0.083498413 |
| 219089_s_at | -0.02222833 | -0.71076213 | 0.480052692 | 0.655419451 |
| 219090_at   | -0.52328326 | -4.84027763 | 9.83E-06    | 0.000105316 |
| 219091_s_at | 0.128476728 | 2.371279864 | 0.021035262 | 0.064149295 |
| 219092_s_at | -0.06316984 | -2.52938154 | 0.014139112 | 0.046245989 |
| 219093_at   | -0.18394414 | -2.83965621 | 0.006200065 | 0.023546339 |
| 219094_at   | -0.16796518 | -3.51766936 | 0.000848489 | 0.004442439 |
| 219095_at   | 0.096252435 | 2.569161633 | 0.012762567 | 0.042550141 |
| 219096_at   | -0.03375772 | -0.81881205 | 0.416213062 | 0.598538972 |
| 219097_x_at | 0.114650017 | 2.71706573  | 0.008646698 | 0.030999378 |
| 219098_at   | -0.13376934 | -3.51970897 | 0.000843131 | 0.004420081 |
| 219099_at   | -0.04523492 | -1.05995549 | 0.29351673  | 0.472068868 |
| 219100_at   | -0.03162826 | -0.88359409 | 0.380528194 | 0.563336515 |
| 219101_x_at | -0.20304135 | -3.96606487 | 0.000201538 | 0.001325946 |
| 219102_at   | -0.00147369 | -0.02901976 | 0.976947497 | 0.988425906 |
| 219103_at   | 0.198174986 | 5.220020646 | 2.47E-06    | 3.37E-05    |
| 219104_at   | -0.04479874 | -0.97000118 | 0.336034939 | 0.518848626 |
| 219105_x_at | 0.053124415 | 1.808648764 | 0.075639788 | 0.175810973 |
| 219106_s_at | 0.013880746 | 0.712444598 | 0.479018319 | 0.654450853 |
| 219107_at   | 0.136350136 | 2.674579602 | 0.00968302  | 0.034002792 |
| 219108_x_at | 0.103370328 | 3.276110377 | 0.00177133  | 0.008236843 |
| 219109_at   | 0.203037304 | 1.986327694 | 0.051683019 | 0.130890095 |
| 219110_at   | 0.02202659  | 0.375745105 | 0.708463979 | 0.828236997 |
| 219111_s_at | -0.39781716 | -6.80024525 | 6.08E-09    | 3.16E-07    |
| 219112_at   | 0.027687911 | 0.84585734  | 0.401075079 | 0.583339216 |
| 219113_x_at | 0.046922935 | 0.79099105  | 0.43214085  | 0.613001933 |
| 219114_at   | -0.03346481 | -0.75400108 | 0.453869492 | 0.633153396 |
| 219115_s_at | 0.178477846 | 3.402507748 | 0.001209456 | 0.005975348 |
| 219116_s_at | 0.181468077 | 3.962020877 | 0.000204246 | 0.001339814 |
| 219117_s_at | -0.664801   | -7.69476563 | 1.88E-10    | 3.15E-08    |
| 219118_at   | -0.06671686 | -2.23657135 | 0.029136375 | 0.083189348 |
| 219119_at   | 0.017453963 | 0.344178645 | 0.73194469  | 0.843586174 |
| 219120_at   | 0.068748754 | 2.072627382 | 0.042617469 | 0.112442289 |
| 219121_s_at | 0.063118728 | 1.696218007 | 0.095154486 | 0.209582784 |
| 219122_s_at | 0.063608275 | 2.488284467 | 0.01570106  | 0.050497392 |
| 219123_at   | 0.087770702 | 1.919201417 | 0.059835556 | 0.1467148   |
| 219124_at   | 0.014273935 | 0.36357074  | 0.717487714 | 0.83463311  |
| 219125_s_at | 0.031649708 | 0.675830862 | 0.501808071 | 0.674059842 |
| 219126_at   | 0.216914908 | 4.777113183 | 1.23E-05    | 0.000126795 |
| 219127_at   | 0.019894189 | 0.428010824 | 0.670213111 | 0.801465346 |
| 219128_at   | 0.083810179 | 1.977614377 | 0.052684322 | 0.132859086 |
| 219129_s_at | 0.115941592 | 3.492939097 | 0.000916088 | 0.004739733 |
| 219130_at   | 0.243717487 | 3.609938551 | 0.000635827 | 0.003506464 |
| 219131_at   | -0.05954234 | -1.95559007 | 0.055289695 | 0.138060512 |
| 219132_at   | 0.185982525 | 3.692814347 | 0.000489044 | 0.002811829 |
| 219133_at   | -0.07282081 | -2.0187111  | 0.048103548 | 0.123739137 |
| 219134_at   | 0.255758406 | 3.742410361 | 0.000417346 | 0.002458419 |
| 219135_s_at | 0.016810454 | 0.383158805 | 0.702989284 | 0.824684282 |
| 219136_s_at | -0.0690565  | -1.35267601 | 0.181358615 | 0.337888912 |
| 219137_s_at | 0.029155098 | 0.440890752 | 0.660915348 | 0.795176566 |
| 219138_at   | -0.0691948  | -1.91276969 | 0.06067126  | 0.148324487 |
| 219139_s_at | -0.11224049 | -2.49930227 | 0.015267715 | 0.049366095 |
| 219140_s_at | -1.12719946 | -6.08394955 | 9.60E-08    | 2.45E-06    |
| 219141_s_at | -0.02029696 | -0.44417312 | 0.658554356 | 0.793617842 |
| 219142_at   | -0.04644264 | -1.28358294 | 0.204343417 | 0.367387401 |
| 219143_s_at | 0.026005715 | 0.637788914 | 0.526096926 | 0.694459752 |
| 219144_at   | -0.12761739 | -2.76958418 | 0.007506464 | 0.027577384 |
| 219145_at   | -0.30275692 | -4.76388414 | 1.29E-05    | 0.000131988 |
| 219146_at   | -0.05079674 | -1.22184742 | 0.226660547 | 0.394169126 |
| 219147_s_at | 0.06928995  | 0.843539234 | 0.402359148 | 0.584617024 |
| 219148_at   | 0.011917144 | 0.729898918 | 0.468361452 | 0.645332656 |
| 219149_x_at | 0.022741081 | 0.940030987 | 0.351062732 | 0.534280993 |
| 219150_s_at | -0.1655078  | -2.78852805 | 0.007130317 | 0.026449879 |
| 219151_s_at | 0.118343768 | 1.047563889 | 0.299143648 | 0.478415743 |
| 219152_at   | -0.03149123 | -0.6296834  | 0.531350671 | 0.698485916 |
| 219153_s_at | -0.00734336 | -0.16657723 | 0.868276488 | 0.928616176 |
| 219154_at   | -0.52574261 | -6.752114   | 7.33E-09    | 3.60E-07    |
| 219155_at   | 0.28978465  | 4.311127822 | 6.31E-05    | 0.000499557 |
| 219156_at   | 0.157660667 | 3.588249971 | 0.000680687 | 0.003709003 |
| 219157_at   | -0.38818201 | -4.4689077  | 3.66E-05    | 0.000317321 |
| 219158_s_at | -0.02620824 | -0.49473529 | 0.622637886 | 0.768169286 |
| 219159_s_at | -0.0655335  | -1.10196428 | 0.274985246 | 0.451319333 |
| 219160_s_at | -0.02376181 | -0.72496678 | 0.47135909  | 0.647725623 |

|             |             |             |             |             |
|-------------|-------------|-------------|-------------|-------------|
| 219161_s_at | 0.190102049 | 2.764199254 | 0.00761667  | 0.027915714 |
| 219162_s_at | -0.03329315 | -0.91169361 | 0.365667511 | 0.549011066 |
| 219163_at   | 0.147172018 | 3.642525727 | 0.00057369  | 0.003218195 |
| 219164_s_at | 0.076111126 | 1.495399785 | 0.140179466 | 0.280296216 |
| 219165_at   | 0.514278413 | 5.800564225 | 2.82E-07    | 5.68E-06    |
| 219166_at   | 0.006599742 | 0.166470055 | 0.868360444 | 0.928661521 |
| 219167_at   | 0.959818209 | 6.994643391 | 2.86E-09    | 1.84E-07    |
| 219168_s_at | 0.022670566 | 0.390074053 | 0.697896871 | 0.821189167 |
| 219169_s_at | 0.091762823 | 3.281129545 | 0.001744962 | 0.008136238 |
| 219170_at   | -0.19453225 | -3.68773065 | 0.000497025 | 0.002850752 |
| 219171_s_at | -0.03009962 | -0.99623203 | 0.323235806 | 0.505213753 |
| 219172_at   | 0.06600697  | 1.642537094 | 0.105837869 | 0.227242061 |
| 219173_at   | 0.2453664   | 4.275571614 | 7.12E-05    | 0.000553821 |
| 219174_at   | 0.263764716 | 3.553381618 | 0.00075919  | 0.004062953 |
| 219175_s_at | -0.19706419 | -5.68318522 | 4.40E-07    | 8.18E-06    |
| 219176_at   | -0.14712042 | -2.3134646  | 0.024227171 | 0.071925118 |
| 219177_at   | -0.03969081 | -1.89997031 | 0.062363882 | 0.151600033 |
| 219178_at   | -0.00841005 | -0.31231566 | 0.755909935 | 0.859599674 |
| 219179_at   | 0.021608082 | 0.404884237 | 0.687037677 | 0.813250553 |
| 219180_s_at | -0.10148406 | -2.35472408 | 0.021908535 | 0.066340859 |
| 219181_at   | 0.066287147 | 1.978001193 | 0.05263952  | 0.1327878   |
| 219182_at   | 0.251509462 | 2.22740356  | 0.029776711 | 0.084606825 |
| 219183_s_at | 0.112379662 | 3.278416391 | 0.001759169 | 0.008187961 |
| 219184_x_at | -0.03366475 | -0.58335246 | 0.561895853 | 0.723107685 |
| 219185_at   | 0.047083048 | 1.1658694   | 0.248393317 | 0.420595765 |
| 219186_at   | -0.29536137 | -4.43795838 | 4.07E-05    | 0.000346902 |
| 219187_at   | 0.06778825  | 2.052084463 | 0.044640256 | 0.116786414 |
| 219188_s_at | 0.147302485 | 5.121097114 | 3.55E-06    | 4.55E-05    |
| 219189_at   | -0.01660608 | -0.4108297  | 0.682696725 | 0.810350468 |
| 219190_s_at | 0.081394701 | 2.260471584 | 0.027523845 | 0.079427629 |
| 219191_s_at | -0.00706749 | -0.10877406 | 0.913753527 | 0.954235738 |
| 219192_at   | 0.234582599 | 3.497784575 | 0.000902453 | 0.004681016 |
| 219193_at   | -0.04362131 | -1.12930844 | 0.263372121 | 0.438107226 |
| 219194_at   | -0.08643671 | -1.60340538 | 0.114225172 | 0.240595314 |
| 219195_at   | 0.036915276 | 0.76253027  | 0.448803917 | 0.628317631 |
| 219196_at   | -0.53025166 | -5.67795293 | 4.48E-07    | 8.28E-06    |
| 219197_s_at | 0.022905328 | 0.640428058 | 0.52439221  | 0.692939273 |
| 219198_at   | -0.10275925 | -2.3187749  | 0.023916995 | 0.071198183 |
| 219199_at   | -0.07647653 | -1.93007003 | 0.058445604 | 0.143980887 |
| 219200_at   | -0.07498544 | -1.34518722 | 0.183750519 | 0.340938191 |
| 219201_s_at | 0.035176844 | 0.928764329 | 0.356823445 | 0.539904302 |
| 219202_at   | 0.270132716 | 3.236072207 | 0.001995531 | 0.009096723 |
| 219203_at   | -0.14862488 | -4.23710606 | 8.12E-05    | 0.000618411 |
| 219204_s_at | 0.089958105 | 1.734714799 | 0.08805175  | 0.197707331 |
| 219205_at   | 0.093057578 | 2.11724959  | 0.038495851 | 0.103704435 |
| 219206_x_at | 0.247247163 | 4.207525413 | 8.98E-05    | 0.000673246 |
| 219207_at   | -0.13214111 | -3.5688759  | 0.000723296 | 0.003900285 |
| 219208_at   | -0.00129849 | -0.08110634 | 0.935633917 | 0.96656533  |
| 219209_at   | 0.152739031 | 2.535728701 | 0.01391083  | 0.045641766 |
| 219210_s_at | -0.022331   | -0.56324918 | 0.575415395 | 0.732853969 |
| 219211_at   | 0.043282326 | 1.122977573 | 0.266029488 | 0.441241862 |
| 219212_at   | -0.12942957 | -2.65878549 | 0.010096384 | 0.035164247 |
| 219213_at   | 0.238248602 | 3.988172207 | 0.000187338 | 0.001246435 |
| 219214_s_at | 0.057598357 | 1.489743901 | 0.141657554 | 0.282405184 |
| 219215_s_at | 0.021791441 | 0.453524095 | 0.651847426 | 0.788989179 |
| 219216_at   | 0.058096318 | 2.526305478 | 0.014250961 | 0.046530095 |
| 219217_at   | -0.06203948 | -1.55892696 | 0.124401533 | 0.256611895 |
| 219218_at   | 0.088140218 | 2.075970124 | 0.042295955 | 0.111798605 |
| 219219_at   | -0.29812792 | -4.54517872 | 2.80E-05    | 0.000253121 |
| 219220_x_at | -0.15243468 | -3.16240846 | 0.00247938  | 0.010917087 |
| 219221_at   | 0.13946734  | 2.281127143 | 0.026194368 | 0.076534956 |
| 219222_at   | 0.025645977 | 0.674884882 | 0.502404591 | 0.674582123 |
| 219223_at   | 0.143129914 | 3.348781367 | 0.001423804 | 0.006860662 |
| 219224_x_at | 0.06497054  | 1.922515366 | 0.059408795 | 0.145860456 |
| 219225_at   | -0.46900779 | -5.8530116  | 2.31E-07    | 4.83E-06    |
| 219226_at   | 0.018051759 | 0.525181829 | 0.601439439 | 0.752780447 |
| 219227_at   | 0.012939987 | 0.245361852 | 0.807034023 | 0.891384594 |
| 219228_at   | -0.02071481 | -0.50031364 | 0.618729128 | 0.765959113 |
| 219229_at   | 0.493721086 | 5.523229555 | 8.01E-07    | 1.34E-05    |
| 219230_at   | -0.15970178 | -2.31696623 | 0.024022241 | 0.071459502 |
| 219231_at   | 0.071343335 | 1.896950278 | 0.06276905  | 0.152410866 |
| 219232_s_at | 0.128766857 | 3.267756699 | 0.001816052 | 0.008414159 |
| 219233_s_at | -0.00189259 | -0.0318419  | 0.974706399 | 0.987265038 |
| 219234_x_at | -0.15054018 | -3.79546999 | 0.000351821 | 0.002125096 |
| 219235_s_at | 0.145412781 | 2.745657473 | 0.008007617 | 0.029124057 |



|             |             |             |             |             |
|-------------|-------------|-------------|-------------|-------------|
| 219236_at   | 0.416973106 | 4.373668711 | 5.09E-05    | 0.000417744 |
| 219237_s_at | 0.023198912 | 0.336244714 | 0.737888109 | 0.847908245 |
| 219238_at   | 0.176394106 | 4.521946271 | 3.04E-05    | 0.000271122 |
| 219239_s_at | 0.003478948 | 0.161048662 | 0.872609332 | 0.931333436 |
| 219240_s_at | -0.15823395 | -4.14477723 | 0.000111038 | 0.000804431 |
| 219241_x_at | 0.160954184 | 3.74487016  | 0.000414066 | 0.002441993 |
| 219242_at   | 0.208860194 | 4.303025318 | 6.49E-05    | 0.00051136  |
| 219243_at   | 0.002594924 | 0.048576314 | 0.961422225 | 0.980330415 |
| 219244_s_at | 0.016497452 | 0.322674807 | 0.748090687 | 0.85477499  |
| 219245_s_at | 0.078826569 | 1.998761393 | 0.050282494 | 0.128025136 |
| 219246_s_at | 0.007323242 | 0.177843662 | 0.859459457 | 0.923451426 |
| 219247_s_at | 0.043331699 | 1.111452005 | 0.270915803 | 0.44669873  |
| 219248_at   | 0.043777496 | 1.200074236 | 0.234942508 | 0.40385608  |
| 219249_s_at | 0.136410721 | 3.263448094 | 0.001839532 | 0.008508833 |
| 219250_s_at | 0.05842936  | 1.441260519 | 0.154836755 | 0.301064357 |
| 219251_s_at | 0.062996183 | 1.071090242 | 0.288523042 | 0.466707872 |
| 219252_s_at | 0.044564187 | 1.011358248 | 0.316005194 | 0.49723366  |
| 219253_at   | 0.108729666 | 1.544291818 | 0.127904371 | 0.26197535  |
| 219254_at   | -0.03527256 | -1.21330574 | 0.229883766 | 0.397784005 |
| 219255_x_at | 0.51202537  | 5.811788401 | 2.70E-07    | 5.48E-06    |
| 219256_s_at | 0.21962556  | 3.373687028 | 0.001320319 | 0.006439781 |
| 219257_s_at | 0.175943185 | 3.359755935 | 0.001377293 | 0.006665291 |
| 219258_at   | 0.090042668 | 3.045831693 | 0.003475336 | 0.0145635   |
| 219259_at   | -0.11082682 | -2.39528217 | 0.01982443  | 0.061162048 |
| 219260_s_at | -0.02346551 | -0.37284789 | 0.710607675 | 0.829968688 |
| 219261_at   | 0.057505954 | 1.79578922  | 0.077687023 | 0.179440201 |
| 219262_at   | -0.01030059 | -0.47983455 | 0.63313224  | 0.776209635 |
| 219263_at   | -0.38002056 | -4.98642647 | 5.80E-06    | 6.80E-05    |
| 219264_s_at | 0.145464705 | 4.512646924 | 3.14E-05    | 0.000278306 |
| 219265_at   | 0.014658687 | 0.443491581 | 0.659044298 | 0.79399417  |
| 219266_at   | 0.079936898 | 2.787057797 | 0.007158877 | 0.026533802 |
| 219267_at   | 0.153966253 | 1.841937796 | 0.070549072 | 0.166603917 |
| 219268_at   | -0.15450572 | -2.78148934 | 0.007268003 | 0.026860299 |
| 219269_at   | 0.465142315 | 3.993614568 | 0.000183992 | 0.00122933  |
| 219270_at   | 0.002527597 | 0.059244171 | 0.952959319 | 0.97586505  |
| 219271_at   | -0.05240196 | -0.9602643  | 0.340870005 | 0.52379873  |
| 219272_at   | 0.007531705 | 0.152898396 | 0.879003972 | 0.935104423 |
| 219273_at   | -0.10579082 | -2.54247009 | 0.013672029 | 0.045014757 |
| 219274_at   | 0.032169605 | 0.803755881 | 0.424788325 | 0.60617005  |
| 219275_at   | -0.14007962 | -2.76042651 | 0.007694766 | 0.028151152 |
| 219276_x_at | 0.004778614 | 0.113524179 | 0.910003258 | 0.952522791 |
| 219277_s_at | -0.44364352 | -5.61943829 | 5.59E-07    | 9.90E-06    |
| 219278_at   | 0.111409609 | 2.021538045 | 0.047801462 | 0.12311087  |
| 219279_at   | 0.147905079 | 1.420044684 | 0.160896244 | 0.309573572 |
| 219280_at   | 0.043215635 | 1.9321467   | 0.058183179 | 0.143481908 |
| 219281_at   | -0.13875278 | -3.57808925 | 0.000702726 | 0.003806814 |
| 219282_s_at | 0.055787863 | 1.186708238 | 0.240134271 | 0.410106647 |
| 219283_at   | 0.039412831 | 1.104506283 | 0.273890762 | 0.450092879 |
| 219284_at   | 0.268269867 | 5.137747152 | 3.34E-06    | 4.32E-05    |
| 219285_s_at | -0.03106685 | -1.17234895 | 0.245803722 | 0.417238024 |
| 219286_s_at | 0.214480636 | 3.728457228 | 0.000436429 | 0.00255233  |
| 219287_at   | 0.311715729 | 4.557918201 | 2.68E-05    | 0.000244182 |
| 219288_at   | -0.52393627 | -5.95301541 | 1.58E-07    | 3.59E-06    |
| 219289_at   | -0.07180259 | -2.71619216 | 0.008666941 | 0.031057002 |
| 219290_x_at | 0.127015939 | 3.388238406 | 0.001263195 | 0.006196323 |
| 219291_at   | -0.00202883 | -0.07937435 | 0.937005468 | 0.96732401  |
| 219292_at   | -0.01129154 | -0.33964639 | 0.73533787  | 0.846065445 |
| 219293_s_at | -0.38302061 | -6.30409709 | 4.13E-08    | 1.27E-06    |
| 219294_at   | 0.060472065 | 2.006218041 | 0.049458329 | 0.126423681 |
| 219295_s_at | -0.01071155 | -0.47376976 | 0.637425521 | 0.779142882 |
| 219296_at   | -0.03551102 | -0.87958746 | 0.382677738 | 0.565376313 |
| 219297_at   | -0.02626544 | -0.42439678 | 0.672831434 | 0.803178035 |
| 219298_at   | 0.104671113 | 2.229130706 | 0.029655135 | 0.084314989 |
| 219299_at   | 0.101939893 | 2.72002814  | 0.008578375 | 0.030808802 |
| 219300_s_at | -0.09652986 | -1.02469154 | 0.30972263  | 0.490299085 |
| 219301_s_at | -0.1747396  | -2.72354761 | 0.008497847 | 0.03058349  |
| 219302_s_at | -0.07813226 | -2.57890348 | 0.012444554 | 0.041685804 |
| 219303_at   | -0.04301452 | -0.78638929 | 0.434809892 | 0.615493394 |
| 219304_s_at | -0.07183738 | -1.51227816 | 0.135840812 | 0.27384133  |
| 219305_x_at | 0.0702779   | 0.921063629 | 0.360795809 | 0.543870962 |
| 219306_at   | 0.002158575 | 0.055883971 | 0.955624456 | 0.977216438 |
| 219307_at   | 0.100284313 | 2.253756189 | 0.027968757 | 0.080482885 |
| 219308_s_at | -0.58561194 | -4.75629786 | 1.33E-05    | 0.000135024 |
| 219309_at   | 0.151809299 | 3.187536552 | 0.002303135 | 0.010261361 |
| 219310_at   | -0.08313627 | -1.6687727  | 0.100500424 | 0.218397597 |

|             |             |             |             |             |
|-------------|-------------|-------------|-------------|-------------|
| 219311_at   | -0.07365919 | -1.58082413 | 0.119304368 | 0.248390517 |
| 219312_s_at | 0.035151609 | 1.235830172 | 0.221455712 | 0.388464637 |
| 219313_at   | 0.426174707 | 4.438106874 | 4.07E-05    | 0.000346856 |
| 219314_s_at | -0.00374077 | -0.09745438 | 0.922698317 | 0.959563309 |
| 219315_s_at | 0.290871961 | 3.799885437 | 0.000346837 | 0.002100671 |
| 219316_s_at | 0.097919226 | 3.154858542 | 0.002534758 | 0.011130223 |
| 219317_at   | 0.204843167 | 3.676210755 | 0.000515576 | 0.002939044 |
| 219318_x_at | -0.03433205 | -0.85224027 | 0.397552449 | 0.579914292 |
| 219319_at   | 0.360705043 | 5.045751315 | 4.67E-06    | 5.71E-05    |
| 219320_at   | -0.00385573 | -0.09009691 | 0.928517629 | 0.962658266 |
| 219321_at   | 0.019745199 | 0.37059555  | 0.712275837 | 0.831019468 |
| 219322_s_at | 0.033263263 | 1.197077913 | 0.236099225 | 0.405244126 |
| 219323_s_at | 0.037724705 | 1.05849116  | 0.294177849 | 0.472825881 |
| 219324_at   | 0.0506095   | 1.403287579 | 0.165810894 | 0.31669817  |
| 219325_s_at | 0.030955537 | 1.374428383 | 0.174545374 | 0.328620012 |
| 219326_s_at | -0.60401589 | -7.19978931 | 1.29E-09    | 1.11E-07    |
| 219327_s_at | 0.175251501 | 3.986983148 | 0.000188076 | 0.001251004 |
| 219328_at   | -0.01202887 | -0.31412115 | 0.754545249 | 0.858878238 |
| 219329_s_at | 0.280824493 | 4.047156077 | 0.000154011 | 0.001056979 |
| 219330_at   | 0.064363679 | 1.811248518 | 0.075231442 | 0.175034808 |
| 219331_s_at | -0.0526354  | -1.61714843 | 0.111220376 | 0.235844613 |
| 219332_at   | 0.353844152 | 6.382558098 | 3.05E-08    | 1.01E-06    |
| 219333_s_at | 0.01410436  | 0.493709029 | 0.623358179 | 0.76876083  |
| 219334_s_at | -0.00431112 | -0.22057708 | 0.826188897 | 0.903649793 |
| 219335_at   | -0.1280292  | -3.01918081 | 0.003750371 | 0.015529656 |
| 219336_s_at | 0.25868223  | 4.201052386 | 9.18E-05    | 0.000685312 |
| 219337_at   | -0.06674898 | -1.9249475  | 0.059097243 | 0.145234607 |
| 219338_s_at | -0.42421568 | -5.6307831  | 5.35E-07    | 9.58E-06    |
| 219339_s_at | -0.03359809 | -0.75943147 | 0.450640506 | 0.630048877 |
| 219340_s_at | 0.036222727 | 1.39171554  | 0.169271899 | 0.321399428 |
| 219341_at   | 0.235749291 | 3.023454081 | 0.003704946 | 0.015368496 |
| 219342_at   | -0.29106703 | -3.92376803 | 0.000231651 | 0.001496122 |
| 219343_at   | -0.24733759 | -3.54261518 | 0.000785123 | 0.004167853 |
| 219344_at   | 0.092033513 | 2.277364401 | 0.026432228 | 0.077043575 |
| 219345_at   | -0.00186247 | -0.04352312 | 0.965432588 | 0.982402396 |
| 219346_at   | -0.14688601 | -2.80065881 | 0.006898648 | 0.025733609 |
| 219347_at   | -0.01138833 | -0.36270083 | 0.71813407  | 0.83497705  |
| 219348_at   | 0.072403164 | 1.487828613 | 0.142160864 | 0.283080258 |
| 219349_s_at | -0.08556615 | -2.63107956 | 0.010860625 | 0.037257269 |
| 219350_s_at | 0.140504799 | 3.183307862 | 0.002331947 | 0.010370086 |
| 219351_at   | -0.25641403 | -4.42300826 | 4.29E-05    | 0.000362261 |
| 219352_at   | 0.057483075 | 0.912658012 | 0.365164159 | 0.548513312 |
| 219353_at   | 0.264718767 | 5.414775278 | 1.20E-06    | 1.85E-05    |
| 219354_at   | -0.04260773 | -0.89083192 | 0.376664464 | 0.55939889  |
| 219355_at   | -0.07342045 | -0.84644064 | 0.400752369 | 0.583078585 |
| 219356_s_at | -0.15822727 | -1.77480424 | 0.081127121 | 0.185658931 |
| 219357_at   | 0.149562199 | 3.724442051 | 0.000442074 | 0.002578928 |
| 219358_s_at | 0.221589725 | 3.980429922 | 0.000192197 | 0.001273867 |
| 219359_at   | 0.176378092 | 3.510619473 | 0.00086726  | 0.004525873 |
| 219360_s_at | 0.10575666  | 2.400459502 | 0.019571582 | 0.060528271 |
| 219361_s_at | 0.023839365 | 0.528859432 | 0.598901663 | 0.750802612 |
| 219362_at   | 0.075875953 | 2.085107462 | 0.041427818 | 0.10990093  |
| 219363_s_at | -0.09669711 | -2.06627248 | 0.04323455  | 0.113794965 |
| 219364_at   | 0.058412784 | 1.593102713 | 0.116520475 | 0.244188197 |
| 219365_s_at | -0.84545077 | -7.25724309 | 1.03E-09    | 9.56E-08    |
| 219366_at   | 0.07846033  | 2.456508528 | 0.017013686 | 0.053996283 |
| 219367_s_at | 0.02330648  | 0.536641082 | 0.593548321 | 0.746772749 |
| 219368_at   | -0.69506874 | -5.30237255 | 1.82E-06    | 2.63E-05    |
| 219369_s_at | -0.06279474 | -1.55444276 | 0.125466551 | 0.258308047 |
| 219370_at   | -0.07016846 | -1.34218081 | 0.184717477 | 0.342107392 |
| 219371_s_at | 0.375216616 | 5.045056012 | 4.69E-06    | 5.71E-05    |
| 219372_at   | 0.18681187  | 2.047595307 | 0.045093187 | 0.1176889   |
| 219373_at   | 0.096599892 | 1.748693533 | 0.08558364  | 0.193430973 |
| 219374_s_at | -0.21093298 | -3.98598769 | 0.000188697 | 0.001254572 |
| 219375_at   | 0.089307984 | 2.179460272 | 0.033331516 | 0.092616545 |
| 219376_at   | 0.018999081 | 0.411395558 | 0.682284135 | 0.810026896 |
| 219377_at   | 0.412116819 | 5.484549169 | 9.26E-07    | 1.50E-05    |
| 219378_at   | 0.16465243  | 2.348390281 | 0.022251091 | 0.067128782 |
| 219379_x_at | 0.089641507 | 1.579378506 | 0.119635621 | 0.248929427 |
| 219380_x_at | 0.017455263 | 0.685700938 | 0.495607164 | 0.668730009 |
| 219381_at   | -0.04766765 | -1.04542438 | 0.30012261  | 0.479449517 |
| 219382_at   | 0.230787605 | 4.832723596 | 1.01E-05    | 0.000107771 |
| 219383_at   | 0.111689201 | 1.942077777 | 0.056942049 | 0.14122192  |
| 219384_s_at | 0.070488418 | 2.221682872 | 0.030182539 | 0.085507014 |
| 219385_at   | 0.089029156 | 2.126173452 | 0.037714605 | 0.102116873 |

|             |             |             |             |             |
|-------------|-------------|-------------|-------------|-------------|
| 219386_s_at | 0.166480116 | 2.476791258 | 0.0161649   | 0.051747132 |
| 219387_at   | 0.336153886 | 3.837001348 | 0.000307538 | 0.001901825 |
| 219388_at   | -0.04015284 | -1.06840875 | 0.289720227 | 0.467966908 |
| 219389_at   | -0.72115026 | -6.72193299 | 8.23E-09    | 3.88E-07    |
| 219390_at   | 0.051989538 | 1.536852626 | 0.129714822 | 0.26478555  |
| 219391_at   | 0.049031202 | 2.164176715 | 0.034540504 | 0.095277387 |
| 219392_x_at | 0.352314888 | 6.56217171  | 1.53E-08    | 6.11E-07    |
| 219393_s_at | -0.02037243 | -0.47470555 | 0.636762253 | 0.778597856 |
| 219394_at   | 0.172036502 | 4.100885382 | 0.000128691 | 0.000913218 |
| 219395_at   | -0.036204   | -0.90398808 | 0.369705213 | 0.55294444  |
| 219396_s_at | -0.03250453 | -0.68748751 | 0.494489243 | 0.668008139 |
| 219397_at   | -0.09440276 | -1.98534471 | 0.051795157 | 0.131107225 |
| 219398_at   | -0.06353034 | -1.67412683 | 0.099438659 | 0.216722547 |
| 219399_at   | -0.06303001 | -1.11249302 | 0.270471885 | 0.446164304 |
| 219400_at   | -0.33730053 | -6.77631999 | 6.67E-09    | 3.37E-07    |
| 219401_at   | 0.116616606 | 2.431427405 | 0.018118626 | 0.056888973 |
| 219402_s_at | 0.01939087  | 0.364789185 | 0.716582744 | 0.833954377 |
| 219403_s_at | 0.019173655 | 0.44190913  | 0.660182461 | 0.794570189 |
| 219404_at   | -0.03713331 | -0.88813547 | 0.378100984 | 0.560578861 |
| 219405_at   | 0.104767231 | 2.549387265 | 0.013430867 | 0.044394076 |
| 219406_at   | 0.037540713 | 0.968997322 | 0.336531323 | 0.519327988 |
| 219407_s_at | 0.079079819 | 1.950219184 | 0.055941502 | 0.139283432 |
| 219408_at   | -0.22703256 | -4.54399537 | 2.81E-05    | 0.000253986 |
| 219409_at   | -0.00239892 | -0.07344549 | 0.94170189  | 0.969803002 |
| 219410_at   | -0.99559295 | -8.15172748 | 3.19E-11    | 1.14E-08    |
| 219411_at   | 0.044855927 | 1.199677412 | 0.235095463 | 0.404048856 |
| 219412_at   | 0.086764646 | 2.581791891 | 0.012351657 | 0.041421196 |
| 219413_at   | 0.069368764 | 1.744529521 | 0.086312776 | 0.194714582 |
| 219414_at   | 0.051730665 | 1.275849208 | 0.207045836 | 0.370754567 |
| 219415_at   | 0.138247841 | 1.861082708 | 0.067754122 | 0.161721173 |
| 219416_at   | 0.03390209  | 0.738429863 | 0.463202197 | 0.641109711 |
| 219417_s_at | 0.019646939 | 0.442284662 | 0.65991229  | 0.794377405 |
| 219418_at   | 0.000389481 | 0.01317736  | 0.989531079 | 0.995067312 |
| 219419_at   | 0.042451558 | 1.606155552 | 0.11361868  | 0.239566242 |
| 219420_s_at | -0.05604028 | -1.41635609 | 0.16196826  | 0.31107372  |
| 219421_at   | -0.2772897  | -4.01848911 | 0.000169423 | 0.001144993 |
| 219422_at   | 0.004691396 | 0.132798321 | 0.894808109 | 0.943783829 |
| 219423_x_at | -0.04074387 | -0.65432374 | 0.515464617 | 0.685710938 |
| 219424_at   | 0.165855313 | 2.891171733 | 0.00537724  | 0.020921005 |
| 219425_at   | -0.53471132 | -6.12544468 | 8.19E-08    | 2.16E-06    |
| 219426_at   | 0.357475638 | 4.162362013 | 0.000104644 | 0.000765553 |
| 219427_at   | 0.21759919  | 5.571976613 | 6.68E-07    | 1.14E-05    |
| 219428_s_at | -0.01896249 | -0.59241339 | 0.555854233 | 0.718170547 |
| 219429_at   | 0.309545302 | 2.234822927 | 0.029257549 | 0.083455348 |
| 219430_at   | -0.16638199 | -4.3116646  | 6.30E-05    | 0.000498816 |
| 219431_at   | 0.174457126 | 4.235273036 | 8.17E-05    | 0.000621645 |
| 219432_at   | 0.134162723 | 3.741504344 | 0.00041856  | 0.002463625 |
| 219433_at   | 0.126445471 | 4.593562605 | 2.36E-05    | 0.000219502 |
| 219434_at   | 0.011700368 | 0.290284463 | 0.772624003 | 0.869852744 |
| 219435_at   | -0.00129584 | -0.03847209 | 0.969442125 | 0.984599297 |
| 219436_s_at | 0.035772203 | 0.63578186  | 0.527395296 | 0.695372627 |
| 219437_s_at | 0.110854028 | 1.973063881 | 0.053213827 | 0.133901941 |
| 219438_at   | -0.00018582 | -0.00300547 | 0.997612202 | 0.998819045 |
| 219439_at   | 0.071236335 | 1.640303386 | 0.106302762 | 0.22788361  |
| 219440_at   | 0.009076584 | 0.205378181 | 0.837988852 | 0.910517304 |
| 219441_s_at | 0.006062772 | 0.165442273 | 0.869165648 | 0.929166893 |
| 219442_at   | 0.000256519 | 0.006197733 | 0.99507602  | 0.997710268 |
| 219443_at   | -0.04364838 | -1.0691465  | 0.289390508 | 0.467670967 |
| 219444_at   | 0.062964769 | 2.119147047 | 0.038328566 | 0.10335346  |
| 219445_at   | -0.00269632 | -0.09520771 | 0.924474855 | 0.960494472 |
| 219446_at   | -0.61221253 | -7.59546278 | 2.76E-10    | 4.03E-08    |
| 219447_s_at | 0.102555672 | 3.05126019  | 0.003421674 | 0.014362867 |
| 219448_at   | -0.04838166 | -1.64601233 | 0.10511787  | 0.226111944 |
| 219449_s_at | -0.56151711 | -5.73090453 | 3.67E-07    | 7.04E-06    |
| 219450_at   | 0.02819553  | 0.806184203 | 0.423398149 | 0.605016949 |
| 219451_at   | 0.07290181  | 1.769035639 | 0.082094703 | 0.187240442 |
| 219452_at   | 0.042509519 | 1.106775245 | 0.272916422 | 0.448953944 |
| 219453_at   | 0.062564524 | 2.063947299 | 0.04346226  | 0.114293341 |
| 219454_at   | -0.07255543 | -2.15028551 | 0.03567251  | 0.097695518 |
| 219455_at   | 0.124525932 | 2.312469195 | 0.024285709 | 0.072079754 |
| 219456_s_at | 0.031785522 | 0.898799107 | 0.372440193 | 0.5555561   |
| 219457_s_at | 0.067122362 | 1.600381472 | 0.114895043 | 0.241630478 |
| 219458_s_at | 0.042101229 | 1.204427194 | 0.23326941  | 0.401930623 |
| 219459_at   | -0.10082223 | -2.73809492 | 0.008172297 | 0.029606906 |
| 219460_s_at | 0.126347633 | 3.845985179 | 0.000298689 | 0.001856093 |

|             |             |             |             |             |
|-------------|-------------|-------------|-------------|-------------|
| 219461_at   | -0.83998232 | -8.95092076 | 1.47E-12    | 2.67E-09    |
| 219462_at   | 0.084091109 | 2.788863805 | 0.00712381  | 0.026432321 |
| 219463_at   | -1.35047377 | -6.38662146 | 3.01E-08    | 9.95E-07    |
| 219464_at   | -0.08118539 | -1.38877227 | 0.170160987 | 0.322666558 |
| 219465_at   | 0.025743768 | 0.942999759 | 0.349554901 | 0.532639197 |
| 219466_s_at | -0.01272312 | -0.55641408 | 0.580047699 | 0.736546533 |
| 219467_at   | 0.024011428 | 0.460909546 | 0.646570566 | 0.785573394 |
| 219468_s_at | 0.322717756 | 4.414945392 | 4.41E-05    | 0.000370356 |
| 219469_at   | 0.198313861 | 2.358367158 | 0.021713643 | 0.065827304 |
| 219470_x_at | -0.01003503 | -0.34648631 | 0.730219062 | 0.84270245  |
| 219471_at   | 0.03310994  | 1.105810629 | 0.273330351 | 0.449370219 |
| 219472_at   | -0.06770621 | -1.59666198 | 0.11572335  | 0.24297228  |
| 219473_at   | -0.00510298 | -0.12206836 | 0.903262772 | 0.948644541 |
| 219474_at   | -0.02283798 | -0.92137894 | 0.360632601 | 0.543790013 |
| 219475_at   | -0.00904181 | -0.12251954 | 0.902907031 | 0.948403778 |
| 219476_at   | 0.009815218 | 0.200420358 | 0.841846191 | 0.913154458 |
| 219477_s_at | 0.198822612 | 4.381337818 | 4.95E-05    | 0.000408482 |
| 219478_at   | -0.33874868 | -5.24788082 | 2.23E-06    | 3.10E-05    |
| 219479_at   | 0.029393443 | 1.006622755 | 0.318257044 | 0.499580057 |
| 219480_at   | 0.041353119 | 1.022231924 | 0.310875175 | 0.491653396 |
| 219481_at   | -0.08632521 | -1.82065716 | 0.073769022 | 0.172413195 |
| 219482_at   | 0.069880515 | 1.906880284 | 0.061445178 | 0.149823117 |
| 219483_s_at | -0.12251728 | -3.65185103 | 0.000557004 | 0.003137588 |
| 219484_at   | 0.016194393 | 0.504666008 | 0.615687076 | 0.763664303 |
| 219485_s_at | -0.14999026 | -2.25908837 | 0.027614971 | 0.079644314 |
| 219486_at   | 0.013264306 | 0.366483501 | 0.715325011 | 0.833135189 |
| 219487_at   | 0.06562933  | 1.602479385 | 0.114429967 | 0.240969895 |
| 219488_at   | 0.023003377 | 0.439102613 | 0.662203007 | 0.796061458 |
| 219489_s_at | 0.413522075 | 6.829393792 | 5.43E-09    | 2.93E-07    |
| 219490_s_at | -0.00995777 | -0.29246547 | 0.770964393 | 0.868878385 |
| 219491_at   | 0.041350117 | 0.929688409 | 0.356348669 | 0.53951471  |
| 219492_at   | 0.336994225 | 5.366057604 | 1.44E-06    | 2.16E-05    |
| 219493_at   | -0.02133703 | -0.89757709 | 0.373086153 | 0.556122061 |
| 219494_at   | -0.13891857 | -3.71687229 | 0.000452906 | 0.002634553 |
| 219495_s_at | -0.07349747 | -2.42231628 | 0.018535707 | 0.057897528 |
| 219496_at   | 0.205193061 | 3.974110825 | 0.000196254 | 0.001296331 |
| 219497_s_at | -0.28205214 | -5.40575202 | 1.24E-06    | 1.90E-05    |
| 219498_s_at | -0.12727981 | -3.90341509 | 0.000247641 | 0.001581757 |
| 219499_at   | -0.27969429 | -4.00890012 | 0.000174902 | 0.001176334 |
| 219500_at   | 0.004204551 | 0.105522679 | 0.916321665 | 0.955555635 |
| 219501_at   | -0.09094433 | -1.59957645 | 0.115073911 | 0.241926955 |
| 219502_at   | -0.02702138 | -0.87413518 | 0.385615094 | 0.568250785 |
| 219503_s_at | 0.038001933 | 1.248209212 | 0.216921615 | 0.383097322 |
| 219504_s_at | -0.05290676 | -1.06029233 | 0.293364798 | 0.471926411 |
| 219505_at   | 0.213384786 | 3.856972953 | 0.000288199 | 0.001800165 |
| 219506_at   | 0.256601204 | 4.59753455  | 2.33E-05    | 0.000217085 |
| 219507_at   | -0.02776079 | -0.71061899 | 0.480140751 | 0.655480052 |
| 219508_at   | -0.00331101 | -0.11318464 | 0.910271259 | 0.95269175  |
| 219509_at   | -0.02759942 | -0.61566908 | 0.540498272 | 0.70600464  |
| 219510_at   | 0.110098187 | 2.421329229 | 0.018581405 | 0.058024047 |
| 219511_s_at | 0.101739742 | 1.818673405 | 0.074075364 | 0.1729754   |
| 219512_at   | -0.02249805 | -1.12455092 | 0.265367319 | 0.440491614 |
| 219513_s_at | -0.0115371  | -0.30931071 | 0.758182962 | 0.860971049 |
| 219514_at   | 0.015609826 | 0.421555472 | 0.674892786 | 0.804684154 |
| 219515_at   | -0.02343692 | -0.58112736 | 0.563384466 | 0.724173217 |
| 219516_at   | -0.00788374 | -0.17858002 | 0.8588838   | 0.923054823 |
| 219517_at   | 0.065463112 | 2.515101363 | 0.014665155 | 0.04767998  |
| 219518_s_at | 0.088636721 | 2.237139882 | 0.029097068 | 0.083103666 |
| 219519_s_at | 0.04712455  | 1.210628212 | 0.230900987 | 0.399052504 |
| 219520_s_at | 0.377204749 | 8.381292025 | 1.31E-11    | 6.24E-09    |
| 219521_at   | 0.050191884 | 0.855976791 | 0.39549923  | 0.578145801 |
| 219522_at   | 0.065224109 | 1.221469763 | 0.226802353 | 0.394314587 |
| 219523_s_at | -0.06008418 | -0.72078835 | 0.473907109 | 0.649948032 |
| 219524_s_at | -0.05177447 | -1.95769202 | 0.055036377 | 0.137543241 |
| 219525_at   | 0.116643129 | 2.945918257 | 0.004614486 | 0.018462901 |
| 219526_at   | -0.0489631  | -1.35240781 | 0.181443867 | 0.337977297 |
| 219527_at   | 0.092502713 | 3.348860739 | 0.001423462 | 0.006859756 |
| 219528_s_at | -0.99210303 | -7.44620729 | 4.94E-10    | 5.77E-08    |
| 219529_at   | 0.021265142 | 0.663991149 | 0.509301636 | 0.680401914 |
| 219530_at   | 0.089253216 | 2.20718835  | 0.031232685 | 0.08793871  |
| 219531_at   | -0.01492092 | -0.32851366 | 0.743695059 | 0.851494072 |
| 219532_at   | -0.48732701 | -6.22723958 | 5.55E-08    | 1.59E-06    |
| 219533_at   | 0.002481895 | 0.058964926 | 0.953180782 | 0.975934834 |
| 219534_x_at | 0.372997565 | 3.575140024 | 0.000709249 | 0.003833788 |
| 219535_at   | -0.01315308 | -0.39053518 | 0.697557788 | 0.821006338 |

|             |             |             |             |             |
|-------------|-------------|-------------|-------------|-------------|
| 219536_s_at | -0.0514752  | -1.62055456 | 0.110485637 | 0.234653998 |
| 219537_x_at | -0.31346704 | -6.11051473 | 8.67E-08    | 2.26E-06    |
| 219538_at   | 0.088487189 | 2.216833795 | 0.030530344 | 0.086298282 |
| 219539_at   | 0.077258327 | 2.619033244 | 0.011209071 | 0.038262689 |
| 219540_at   | 0.097306751 | 2.307387131 | 0.024586543 | 0.072741966 |
| 219541_at   | -0.04672185 | -1.02329975 | 0.310374448 | 0.491052635 |
| 219542_at   | 0.34276773  | 4.376107976 | 5.04E-05    | 0.000414623 |
| 219543_at   | 0.148857422 | 1.843717117 | 0.070285285 | 0.166156569 |
| 219544_at   | -0.05565367 | -1.44683619 | 0.153274148 | 0.298845136 |
| 219545_at   | -1.30E-05   | -0.00027939 | 0.999778029 | 0.999822772 |
| 219546_at   | 0.125184099 | 2.545851414 | 0.013553656 | 0.044700759 |
| 219547_at   | 0.161738211 | 3.282472816 | 0.001737968 | 0.008107857 |
| 219548_at   | 0.029968067 | 1.008987889 | 0.317131017 | 0.498402127 |
| 219549_s_at | -0.20634153 | -2.98011934 | 0.004190322 | 0.017055906 |
| 219550_at   | 0.319641452 | 5.943094207 | 1.64E-07    | 3.71E-06    |
| 219551_at   | 0.064646125 | 1.630750431 | 0.108309753 | 0.231296803 |
| 219552_at   | 0.074715919 | 2.346504252 | 0.022354014 | 0.067352902 |
| 219553_at   | 0.054234964 | 0.807152788 | 0.422844413 | 0.60473102  |
| 219554_at   | 0.088689226 | 2.268805876 | 0.026980393 | 0.078212863 |
| 219555_s_at | -0.00644129 | -0.15713385 | 0.875679827 | 0.933249566 |
| 219556_at   | -0.06811637 | -2.00530571 | 0.049558539 | 0.126600183 |
| 219557_s_at | -0.58928289 | -4.95312176 | 6.54E-06    | 7.53E-05    |
| 219558_at   | -0.1450164  | -3.45476753 | 0.001030563 | 0.005226726 |
| 219559_at   | 0.052738951 | 1.254518286 | 0.214637302 | 0.380359954 |
| 219560_at   | -0.03480314 | -1.251855   | 0.215599414 | 0.381554383 |
| 219561_at   | 0.127043127 | 3.130527386 | 0.002721222 | 0.011832737 |
| 219562_at   | -0.58104182 | -6.60015467 | 1.32E-08    | 5.53E-07    |
| 219563_at   | 0.648871464 | 6.276799507 | 4.59E-08    | 1.37E-06    |
| 219564_at   | 0.378504757 | 2.228891007 | 0.029671982 | 0.084352154 |
| 219565_at   | 0.122269422 | 3.377758502 | 0.001304094 | 0.006369681 |
| 219566_at   | 0.177632706 | 4.423580088 | 4.28E-05    | 0.000361817 |
| 219567_s_at | -0.09139842 | -3.11866212 | 0.002816745 | 0.012185266 |
| 219568_x_at | 0.072877316 | 1.770435538 | 0.081859016 | 0.18683638  |
| 219569_s_at | -0.06711644 | -0.95931924 | 0.34134172  | 0.52425321  |
| 219570_at   | 0.084188368 | 2.014095524 | 0.048600302 | 0.124708314 |
| 219571_s_at | 0.1980716   | 4.035796687 | 0.000159949 | 0.001091362 |
| 219572_at   | 0.182154336 | 3.047492666 | 0.003458834 | 0.014503867 |
| 219573_at   | 0.004534263 | 0.08864247  | 0.929668476 | 0.963337434 |
| 219574_at   | 0.011168548 | 0.239055142 | 0.811897406 | 0.894495677 |
| 219575_s_at | -0.1919647  | -4.02433143 | 0.000166166 | 0.001126538 |
| 219576_at   | -0.02365697 | -0.80338107 | 0.425003144 | 0.606399148 |
| 219577_s_at | 0.07250046  | 1.503919862 | 0.137975867 | 0.277049973 |
| 219578_s_at | 0.054572629 | 0.92367543  | 0.359445347 | 0.542585587 |
| 219579_at   | 0.02563535  | 0.573420336 | 0.568555553 | 0.727784979 |
| 219580_s_at | 0.002122374 | 0.05864187  | 0.953436994 | 0.976080838 |
| 219581_at   | -0.11583839 | -2.95974699 | 0.004438392 | 0.0178816   |
| 219582_at   | 0.280275389 | 4.69869934  | 1.63E-05    | 0.000160915 |
| 219583_s_at | 0.023838528 | 0.555738781 | 0.580506334 | 0.736951046 |
| 219584_at   | 0.40628876  | 3.466464107 | 0.000994116 | 0.005069494 |
| 219585_at   | -0.03053963 | -0.69403622 | 0.49040335  | 0.664617961 |
| 219586_at   | -0.07204504 | -1.75577138 | 0.084356001 | 0.191256006 |
| 219587_at   | -0.08091858 | -1.23474796 | 0.221855382 | 0.388829833 |
| 219588_s_at | -0.0374794  | -1.07774467 | 0.285566881 | 0.463351549 |
| 219589_s_at | 0.023794816 | 0.975078422 | 0.333531764 | 0.516178461 |
| 219590_x_at | 0.015398743 | 0.508883137 | 0.612745996 | 0.761188322 |
| 219591_at   | -0.22555177 | -4.47529677 | 3.58E-05    | 0.00031167  |
| 219592_at   | -0.1059983  | -2.8090391  | 0.006742676 | 0.025242391 |
| 219593_at   | 0.247340416 | 4.977726315 | 5.99E-06    | 6.98E-05    |
| 219594_at   | 0.166618977 | 1.350362952 | 0.182094858 | 0.338836847 |
| 219595_at   | 0.107822658 | 3.578515665 | 0.000701787 | 0.003803114 |
| 219596_at   | -0.15082089 | -3.63277867 | 0.00059164  | 0.003301252 |
| 219597_s_at | -0.05393005 | -1.07389918 | 0.28727263  | 0.465477064 |
| 219598_s_at | 0.040519226 | 0.643873792 | 0.522170866 | 0.69107348  |
| 219599_at   | 0.062083955 | 1.060956987 | 0.293065161 | 0.47159717  |
| 219600_s_at | -0.00210724 | -0.01975959 | 0.984302322 | 0.992384935 |
| 219601_s_at | 0.009597526 | 0.498470227 | 0.620019592 | 0.766844213 |
| 219602_s_at | 0.419839628 | 3.185796308 | 0.002314951 | 0.010306814 |
| 219603_s_at | 0.159312325 | 1.961545812 | 0.054574513 | 0.136671754 |
| 219604_s_at | -0.00844299 | -0.32084002 | 0.749473702 | 0.855567783 |
| 219605_at   | -0.08760533 | -2.42503548 | 0.018410337 | 0.057614647 |
| 219606_at   | 0.039976975 | 1.650566367 | 0.104180409 | 0.224636023 |
| 219607_s_at | 0.13823439  | 1.686152679 | 0.09708729  | 0.212822502 |
| 219608_s_at | -0.01682369 | -0.60407512 | 0.548126619 | 0.711456636 |
| 219609_at   | -0.03457301 | -1.04672463 | 0.299527403 | 0.478851015 |
| 219610_at   | -0.02544461 | -0.89291193 | 0.37555871  | 0.55847707  |

|             |             |             |             |             |
|-------------|-------------|-------------|-------------|-------------|
| 219611_s_at | -0.00471497 | -0.13070636 | 0.896455538 | 0.94449164  |
| 219612_s_at | 0.008970507 | 0.373321664 | 0.710256959 | 0.829735573 |
| 219613_s_at | 0.012433539 | 0.408331877 | 0.684519157 | 0.811311085 |
| 219614_s_at | 0.045089922 | 1.338095599 | 0.186037593 | 0.343783011 |
| 219615_s_at | 0.044355623 | 1.686528109 | 0.097014624 | 0.212684077 |
| 219616_at   | 0.095939284 | 1.974383601 | 0.053059795 | 0.133597089 |
| 219617_at   | -0.09026388 | -2.54038235 | 0.013745583 | 0.045220288 |
| 219618_at   | 0.030614668 | 0.907929756 | 0.367636234 | 0.550801159 |
| 219619_at   | -1.13103243 | -6.72811337 | 8.04E-09    | 3.82E-07    |
| 219620_x_at | 0.066318576 | 2.13211679  | 0.037201998 | 0.100961362 |
| 219621_at   | 0.013136898 | 0.31277883  | 0.755559768 | 0.859573291 |
| 219622_at   | 0.120419468 | 2.182300991 | 0.033110944 | 0.092181791 |
| 219623_at   | -0.01289799 | -0.44302002 | 0.659383377 | 0.794066434 |
| 219624_at   | -0.02958549 | -1.16250429 | 0.249745903 | 0.422165887 |
| 219625_s_at | -0.16180906 | -2.85910841 | 0.005876579 | 0.022499859 |
| 219626_at   | 0.065874342 | 2.136749122 | 0.036806694 | 0.100123212 |
| 219627_at   | 0.135268525 | 3.389631785 | 0.001257849 | 0.006176203 |
| 219628_at   | -0.31640734 | -4.09357409 | 0.000131883 | 0.000931731 |
| 219629_at   | -0.06395699 | -0.72478272 | 0.471471166 | 0.647819878 |
| 219630_at   | -0.04768426 | -1.30589844 | 0.196693303 | 0.357516557 |
| 219631_at   | -0.33204992 | -5.59318768 | 6.17E-07    | 1.07E-05    |
| 219632_s_at | 0.24383909  | 4.313451791 | 6.26E-05    | 0.000496088 |
| 219633_at   | -0.01872032 | -0.61392624 | 0.541641502 | 0.706728912 |
| 219634_at   | -0.09515988 | -2.16729933 | 0.034290416 | 0.094727856 |
| 219635_at   | 0.129217595 | 3.282264985 | 0.001739048 | 0.00811205  |
| 219636_s_at | -0.17386383 | -3.37767813 | 0.001304413 | 0.006369844 |
| 219637_at   | -0.22945698 | -6.28469923 | 4.45E-08    | 1.34E-06    |
| 219638_at   | 0.004885182 | 0.193046777 | 0.847590247 | 0.916266944 |
| 219639_x_at | -0.04203528 | -1.25633279 | 0.213983632 | 0.379528394 |
| 219640_at   | 0.041588568 | 1.088263186 | 0.280937096 | 0.458101309 |
| 219641_at   | -0.05135882 | -1.15765243 | 0.251705362 | 0.42462549  |
| 219642_s_at | 0.049225391 | 1.043091446 | 0.301192566 | 0.480712026 |
| 219643_at   | -0.1157634  | -2.42371073 | 0.01847132  | 0.057748879 |
| 219644_at   | 0.150050823 | 2.680896325 | 0.009522075 | 0.033527185 |
| 219645_at   | 0.027239815 | 0.734604227 | 0.465511797 | 0.643192063 |
| 219646_at   | -0.17081338 | -3.43667881 | 0.001089434 | 0.005465761 |
| 219647_at   | 0.028245805 | 0.707962371 | 0.481776737 | 0.657011045 |
| 219648_at   | 0.03159512  | 0.627848586 | 0.532543716 | 0.69952855  |
| 219649_at   | -0.04802312 | -1.00936845 | 0.316950086 | 0.498193411 |
| 219650_at   | 0.012112939 | 0.505462521 | 0.61513109  | 0.763205871 |
| 219651_at   | -0.00644326 | -0.27112613 | 0.787247364 | 0.878615847 |
| 219652_s_at | 0.062062895 | 1.273219806 | 0.207970669 | 0.371978435 |
| 219653_at   | -0.02817511 | -0.76057418 | 0.449962744 | 0.629389807 |
| 219654_at   | 0.051292226 | 1.250964909 | 0.215921668 | 0.381882828 |
| 219655_at   | 0.054194387 | 1.076072997 | 0.286307521 | 0.464249899 |
| 219656_at   | 0.01692094  | 0.481092792 | 0.632243106 | 0.775587639 |
| 219657_s_at | 0.00878361  | 0.190260108 | 0.849763258 | 0.917555436 |
| 219658_at   | 0.062093301 | 1.36118973  | 0.178668224 | 0.334269937 |
| 219659_at   | -0.6635083  | -5.30012022 | 1.84E-06    | 2.64E-05    |
| 219660_s_at | -0.36350634 | -6.20983853 | 5.93E-08    | 1.68E-06    |
| 219661_at   | 0.054233369 | 1.453095772 | 0.151534558 | 0.296413753 |
| 219662_at   | -0.02756209 | -0.72637313 | 0.470503239 | 0.64706683  |
| 219663_s_at | -0.19627188 | -4.932033   | 7.06E-06    | 8.04E-05    |
| 219664_s_at | -0.01301441 | -0.45114117 | 0.653553849 | 0.790041617 |
| 219665_at   | -0.05841369 | -1.62598085 | 0.109323253 | 0.232871398 |
| 219666_at   | 0.263270329 | 3.836268931 | 0.00030827  | 0.0019053   |
| 219667_s_at | -0.03513354 | -1.18996508 | 0.238861635 | 0.408588976 |
| 219668_at   | -0.17694306 | -4.07258888 | 0.000141478 | 0.000986414 |
| 219669_at   | 0.004729058 | 0.094960865 | 0.924670074 | 0.960540989 |
| 219670_at   | -0.02917209 | -0.52069152 | 0.604544764 | 0.754849122 |
| 219671_at   | -0.74617529 | -5.75172679 | 3.39E-07    | 6.62E-06    |
| 219672_at   | -0.04590119 | -1.15369367 | 0.253312261 | 0.426243658 |
| 219673_at   | 0.035690906 | 1.229685801 | 0.223731926 | 0.390907668 |
| 219674_s_at | -0.05233593 | -1.05826866 | 0.294278392 | 0.47291945  |
| 219675_s_at | -0.12374284 | -2.86381515 | 0.005800687 | 0.022269936 |
| 219676_at   | 0.090538373 | 2.693603248 | 0.0092057   | 0.032655063 |
| 219677_at   | 0.007346737 | 0.161828753 | 0.871997719 | 0.930969687 |
| 219678_x_at | 0.308146133 | 5.664134713 | 4.72E-07    | 8.65E-06    |
| 219679_s_at | -0.18235495 | -3.0637344  | 0.00330128  | 0.013929455 |
| 219680_at   | 0.137950106 | 4.359406078 | 5.34E-05    | 0.000435996 |
| 219681_s_at | 0.008623107 | 0.455061975 | 0.650747134 | 0.788359525 |
| 219682_s_at | 0.158230148 | 4.907234784 | 7.72E-06    | 8.62E-05    |
| 219683_at   | -0.19737719 | -1.77154936 | 0.081671896 | 0.186590346 |
| 219684_at   | 0.129382423 | 3.50874285  | 0.000872323 | 0.004546455 |
| 219685_at   | -0.78541075 | -5.12379066 | 3.52E-06    | 4.51E-05    |

|             |             |             |             |             |
|-------------|-------------|-------------|-------------|-------------|
| 219686_at   | 0.007214046 | 0.17869388  | 0.858794797 | 0.923033528 |
| 219687_at   | -0.02218348 | -0.61301084 | 0.542242462 | 0.707157043 |
| 219688_at   | -0.08572554 | -2.75265431 | 0.007857975 | 0.028659476 |
| 219689_at   | 0.010559432 | 0.120262342 | 0.904686957 | 0.949437489 |
| 219690_at   | 0.170818559 | 2.792494327 | 0.007053794 | 0.026216063 |
| 219691_at   | -0.04106167 | -1.12944108 | 0.26331665  | 0.438061745 |
| 219692_at   | 0.040892432 | 1.174238729 | 0.245052129 | 0.416335409 |
| 219693_at   | 0.113149089 | 1.720774007 | 0.090571502 | 0.201876293 |
| 219694_at   | -0.01249316 | -0.47747871 | 0.634798453 | 0.777340041 |
| 219695_at   | -0.49560798 | -8.40658188 | 1.19E-11    | 6.05E-09    |
| 219696_at   | -0.43079454 | -6.82811453 | 5.46E-09    | 2.94E-07    |
| 219697_at   | -0.08240856 | -1.67166877 | 0.099924967 | 0.217488858 |
| 219698_s_at | 0.025334858 | 0.672372611 | 0.503990654 | 0.676021198 |
| 219699_at   | -0.01310225 | -0.31969091 | 0.750340299 | 0.856228996 |
| 219700_at   | -0.15136826 | -2.66919105 | 0.009822278 | 0.034397559 |
| 219701_at   | -0.41482785 | -5.1312213  | 3.42E-06    | 4.41E-05    |
| 219702_at   | 0.033498907 | 0.877462778 | 0.38382071  | 0.566503143 |
| 219703_at   | 0.482483679 | 3.444091643 | 0.001064933 | 0.005368751 |
| 219704_at   | -0.036703   | -0.78174654 | 0.437512583 | 0.61801297  |
| 219705_at   | -0.01120664 | -0.35046944 | 0.727243845 | 0.840756944 |
| 219706_at   | -0.01567994 | -0.49065555 | 0.625503494 | 0.770513551 |
| 219707_at   | -0.06747127 | -1.3689909  | 0.176229841 | 0.330913157 |
| 219708_at   | 0.016137572 | 0.287906208 | 0.774434924 | 0.870937233 |
| 219709_x_at | 0.364028161 | 6.562590912 | 1.53E-08    | 6.11E-07    |
| 219710_at   | 0.111414284 | 1.512508068 | 0.135782455 | 0.273782516 |
| 219711_at   | -0.03582158 | -0.91050265 | 0.366289725 | 0.549557026 |
| 219712_s_at | 0.073888323 | 1.7717088   | 0.08164514  | 0.186553889 |
| 219713_at   | 0.132930366 | 3.810517832 | 0.000335112 | 0.002043608 |
| 219714_s_at | -1.0417823  | -7.1329707  | 1.67E-09    | 1.29E-07    |
| 219715_s_at | -0.06930325 | -1.71514239 | 0.091606133 | 0.203694775 |
| 219716_at   | 0.002045996 | 0.03766513  | 0.970082773 | 0.984891851 |
| 219717_at   | 0.033103021 | 0.604549067 | 0.547813717 | 0.711174422 |
| 219718_at   | 0.041037471 | 0.875294553 | 0.384989315 | 0.567658524 |
| 219719_at   | 0.263423439 | 3.678537399 | 0.000511776 | 0.002922979 |
| 219720_s_at | 0.075055451 | 2.23819024  | 0.029024573 | 0.082947141 |
| 219721_at   | -0.01586867 | -0.43753943 | 0.663329511 | 0.796836966 |
| 219722_s_at | 0.071707015 | 1.772288869 | 0.081547857 | 0.186438255 |
| 219723_x_at | -0.04115558 | -0.921209   | 0.36072056  | 0.543849248 |
| 219724_s_at | -0.31693222 | -4.98491253 | 5.83E-06    | 6.82E-05    |
| 219725_at   | 0.191323023 | 3.279928587 | 0.001751237 | 0.00816039  |
| 219726_at   | -0.07221182 | -1.45471965 | 0.151085799 | 0.295819024 |
| 219727_at   | -0.01462429 | -0.28996348 | 0.77286834  | 0.869941615 |
| 219728_at   | 0.587387584 | 5.641939406 | 5.13E-07    | 9.25E-06    |
| 219729_at   | 0.03061815  | 0.575450937 | 0.567190849 | 0.726930494 |
| 219730_at   | 0.018405739 | 0.724975027 | 0.471354066 | 0.647725623 |
| 219731_at   | -0.05611503 | -1.39605377 | 0.16796795  | 0.319711397 |
| 219732_at   | -0.57731984 | -5.97670095 | 1.45E-07    | 3.35E-06    |
| 219733_s_at | -0.07081337 | -1.5093209  | 0.136593207 | 0.274933509 |
| 219734_at   | 0.056740929 | 1.524807185 | 0.132689491 | 0.269185598 |
| 219735_s_at | 0.035765347 | 0.811709832 | 0.420245013 | 0.602275271 |
| 219736_at   | 0.040996229 | 0.611649778 | 0.54313663  | 0.707765892 |
| 219737_s_at | 0.586019514 | 6.72681576  | 8.08E-09    | 3.83E-07    |
| 219738_s_at | 0.453974144 | 6.320129212 | 3.88E-08    | 1.21E-06    |
| 219739_at   | 0.008778026 | 0.238541818 | 0.812293584 | 0.894670006 |
| 219740_at   | 0.016418739 | 0.479482231 | 0.633381303 | 0.776365903 |
| 219741_x_at | -0.03484205 | -0.93110421 | 0.355622047 | 0.538687512 |
| 219742_at   | -0.47675097 | -6.91531845 | 3.89E-09    | 2.32E-07    |
| 219743_at   | 0.173877667 | 2.847827842 | 0.00606222  | 0.023100673 |
| 219744_at   | -0.05421503 | -1.54320981 | 0.128166435 | 0.262362673 |
| 219745_at   | -0.20867705 | -4.90975976 | 7.65E-06    | 8.56E-05    |
| 219746_at   | 0.062870558 | 1.377721013 | 0.173531366 | 0.327261896 |
| 219747_at   | 0.168848902 | 4.019867026 | 0.000168649 | 0.001140282 |
| 219748_at   | -0.00525357 | -0.11082236 | 0.912136129 | 0.953563694 |
| 219749_at   | 0.004015783 | 0.115785868 | 0.908218349 | 0.951434402 |
| 219750_at   | -0.08735501 | -0.5189168  | 0.605774129 | 0.755687416 |
| 219751_at   | 0.069026696 | 1.22918902  | 0.223916708 | 0.391095801 |
| 219752_at   | -0.06574444 | -1.25265528 | 0.215309977 | 0.381154777 |
| 219753_at   | 0.023460073 | 0.756040424 | 0.452655302 | 0.631952728 |
| 219754_at   | 0.145544781 | 2.118295294 | 0.03840358  | 0.10351202  |
| 219755_at   | 0.019978366 | 0.479702296 | 0.633225728 | 0.776281661 |
| 219756_s_at | -0.03569128 | -0.97167047 | 0.335210579 | 0.518005298 |
| 219757_s_at | 0.008244553 | 0.192420541 | 0.848078475 | 0.916464398 |
| 219758_at   | 0.10493014  | 2.048410651 | 0.045010629 | 0.117507742 |
| 219759_at   | -0.00637173 | -0.19122893 | 0.849007645 | 0.917116228 |
| 219760_at   | -0.33544573 | -5.43849252 | 1.10E-06    | 1.72E-05    |

|             |             |             |             |             |
|-------------|-------------|-------------|-------------|-------------|
| 219761_at   | -0.01576428 | -0.2632073  | 0.793314611 | 0.88237728  |
| 219762_s_at | 0.100564022 | 1.727152785 | 0.089411269 | 0.199998419 |
| 219763_at   | 0.097252815 | 2.393569997 | 0.01990869  | 0.061362701 |
| 219764_at   | 0.029219064 | 0.827551308 | 0.411284023 | 0.593513257 |
| 219765_at   | -0.06062213 | -1.42030108 | 0.160821931 | 0.30947056  |
| 219766_at   | -0.00623366 | -0.1450945  | 0.885134452 | 0.938470984 |
| 219767_s_at | -0.21278339 | -2.65190069 | 0.010281567 | 0.035653617 |
| 219768_at   | -0.04716267 | -1.30465034 | 0.197115414 | 0.358050809 |
| 219769_at   | 0.054828996 | 1.535210476 | 0.130117203 | 0.265425079 |
| 219770_at   | 0.032257256 | 0.656888029 | 0.513826018 | 0.684447927 |
| 219771_at   | 0.010868584 | 0.223027165 | 0.824290413 | 0.902391183 |
| 219772_s_at | -0.02007486 | -0.62936194 | 0.53155959  | 0.698637255 |
| 219773_at   | 0.010548243 | 0.367622941 | 0.714479622 | 0.832482292 |
| 219774_at   | 0.022046269 | 0.881627325 | 0.381582405 | 0.564283382 |
| 219775_s_at | -0.11131099 | -1.88822159 | 0.063952664 | 0.15467138  |
| 219776_s_at | -0.02524382 | -0.51178881 | 0.610723256 | 0.75969839  |
| 219777_at   | 0.187537099 | 2.942075825 | 0.004664555 | 0.018626544 |
| 219778_at   | -0.01416774 | -0.20009423 | 0.842100064 | 0.913304837 |
| 219779_at   | 0.052239502 | 1.195584546 | 0.236677273 | 0.40597124  |
| 219780_at   | 0.013962708 | 0.373437959 | 0.71017088  | 0.829689888 |
| 219781_s_at | -0.0790634  | -1.93782623 | 0.057470591 | 0.142214459 |
| 219782_s_at | 0.040877287 | 1.201470949 | 0.234404722 | 0.403249388 |
| 219783_at   | 0.02575673  | 0.684163531 | 0.496570278 | 0.669625215 |
| 219784_at   | -0.02340322 | -0.63128573 | 0.53030993  | 0.697569207 |
| 219785_s_at | 0.053819318 | 1.989361314 | 0.051338261 | 0.130149729 |
| 219786_at   | -0.05566014 | -1.63986365 | 0.106394479 | 0.228034819 |
| 219787_s_at | -0.02462967 | -0.92791794 | 0.35725866  | 0.540343296 |
| 219788_at   | 0.058678864 | 2.086798415 | 0.04126887  | 0.109576303 |
| 219789_at   | 0.004189552 | 0.105259831 | 0.916529318 | 0.955682982 |
| 219790_s_at | -0.02515301 | -0.66836009 | 0.506529472 | 0.678063115 |
| 219791_s_at | 0.052950711 | 1.52283041  | 0.133182799 | 0.269953542 |
| 219792_at   | 0.011409645 | 0.293216115 | 0.770393445 | 0.86860014  |
| 219793_at   | 0.038314654 | 1.281944641 | 0.204913685 | 0.368086914 |
| 219794_at   | 0.013049792 | 0.242916165 | 0.808919103 | 0.892647224 |
| 219795_at   | 0.000660179 | 0.033580804 | 0.973325617 | 0.986525797 |
| 219796_s_at | 0.027192492 | 0.739401457 | 0.462616674 | 0.640557999 |
| 219797_at   | -0.11555825 | -3.05140748 | 0.003420229 | 0.014358149 |
| 219798_s_at | 0.059637463 | 1.694681253 | 0.095447521 | 0.210041884 |
| 219799_s_at | 0.061890214 | 1.197554798 | 0.235914849 | 0.405043249 |
| 219800_s_at | -0.11650509 | -5.24306713 | 2.27E-06    | 3.14E-05    |
| 219801_at   | 0.129550805 | 3.411227811 | 0.001177689 | 0.00584295  |
| 219802_at   | 0.030050883 | 0.498782729 | 0.619800743 | 0.766667001 |
| 219803_at   | -0.01510899 | -0.60939293 | 0.544620953 | 0.709022648 |
| 219804_at   | 0.009947486 | 0.497852497 | 0.620452298 | 0.767113959 |
| 219805_at   | -0.10637404 | -3.07104857 | 0.00323254  | 0.013678154 |
| 219806_s_at | 0.216406978 | 3.80675301  | 0.00033922  | 0.00206208  |
| 219807_x_at | 0.030023975 | 0.639861356 | 0.524758018 | 0.693243322 |
| 219808_at   | -0.06461848 | -1.36834631 | 0.176430349 | 0.331150526 |
| 219809_at   | -0.03800458 | -1.04845602 | 0.298736088 | 0.477924685 |
| 219810_at   | -0.00035906 | -0.01079853 | 0.991420887 | 0.995967054 |
| 219811_at   | 0.011877347 | 0.282098658 | 0.778862356 | 0.873454692 |
| 219812_at   | 0.043657668 | 0.768744873 | 0.445133819 | 0.62531969  |
| 219813_at   | -0.00681455 | -0.31312774 | 0.755296022 | 0.859381176 |
| 219814_at   | -0.02337109 | -1.02420606 | 0.30994989  | 0.49060671  |
| 219815_at   | 0.024228959 | 0.57326017  | 0.568663264 | 0.72783947  |
| 219816_s_at | 0.067348816 | 1.258475309 | 0.213213696 | 0.378523338 |
| 219817_at   | -0.0496651  | -1.35547832 | 0.18046968  | 0.336709984 |
| 219818_s_at | -0.0159528  | -0.38914055 | 0.698583496 | 0.821614289 |
| 219819_s_at | 0.042346665 | 0.411599699 | 0.682135311 | 0.809963831 |
| 219820_at   | 0.182815612 | 2.81774769  | 0.006584043 | 0.024745947 |
| 219821_s_at | -0.29674306 | -4.60226128 | 2.29E-05    | 0.000214171 |
| 219822_at   | -0.0378807  | -1.39682163 | 0.167737959 | 0.319416963 |
| 219823_at   | 0.002404272 | 0.124077616 | 0.901678694 | 0.947760394 |
| 219824_at   | 0.088643273 | 1.652938959 | 0.10369471  | 0.223794036 |
| 219825_at   | -0.04432996 | -0.95690329 | 0.34254955  | 0.525494267 |
| 219826_at   | 0.085732829 | 2.417032153 | 0.018781529 | 0.058546703 |
| 219827_at   | -0.05727038 | -1.24472429 | 0.218191061 | 0.384686036 |
| 219828_at   | -0.09048135 | -2.12865395 | 0.037499919 | 0.101615619 |
| 219829_at   | 0.004544654 | 0.117677811 | 0.906725606 | 0.950438504 |
| 219830_at   | 0.006020919 | 0.161072105 | 0.872590951 | 0.931333436 |
| 219831_at   | 0.109704459 | 3.444296662 | 0.001064263 | 0.005366583 |
| 219832_s_at | 0.016615369 | 0.316447236 | 0.752788226 | 0.857708385 |
| 219833_s_at | 0.436679747 | 3.005133901 | 0.003903373 | 0.016069413 |
| 219834_at   | -0.03615492 | -0.91518761 | 0.363845991 | 0.547011304 |
| 219835_at   | -0.03198872 | -0.53774635 | 0.592789786 | 0.7461755   |



|             |             |             |             |             |
|-------------|-------------|-------------|-------------|-------------|
| 219836_at   | -0.0135394  | -0.27621415 | 0.783355979 | 0.87614168  |
| 219837_s_at | -0.00625503 | -0.13593577 | 0.89233823  | 0.942363828 |
| 219838_at   | 0.168479895 | 5.351708581 | 1.52E-06    | 2.25E-05    |
| 219839_x_at | 0.013329159 | 0.337780965 | 0.736736013 | 0.847072326 |
| 219840_s_at | -0.00063384 | -0.02136874 | 0.983024148 | 0.991722691 |
| 219841_at   | -0.00289275 | -0.08942092 | 0.929052493 | 0.963011186 |
| 219842_at   | -0.00390941 | -0.12748388 | 0.898994152 | 0.945984334 |
| 219843_at   | 0.239826702 | 4.409216971 | 4.50E-05    | 0.000376503 |
| 219844_at   | -0.00182721 | -0.03927863 | 0.968801834 | 0.984201024 |
| 219845_at   | -0.01222205 | -0.23904422 | 0.811905832 | 0.894495677 |
| 219846_at   | 0.061661388 | 2.308191601 | 0.024538703 | 0.072641434 |
| 219847_at   | -0.02633404 | -0.6581635  | 0.513012024 | 0.683628522 |
| 219848_s_at | 0.23897861  | 3.654913774 | 0.000551626 | 0.003111493 |
| 219849_at   | 0.015932806 | 0.331752093 | 0.741260762 | 0.849839054 |
| 219850_s_at | 0.031375852 | 1.526354402 | 0.132304393 | 0.268646951 |
| 219851_at   | -0.03188554 | -1.26710983 | 0.210131577 | 0.374791822 |
| 219852_s_at | 0.041137019 | 0.783006527 | 0.436778125 | 0.617346235 |
| 219853_at   | -0.06527337 | -2.50919294 | 0.014887932 | 0.048285303 |
| 219854_at   | 0.019094011 | 0.503354461 | 0.616603061 | 0.764165154 |
| 219855_at   | -0.59672435 | -6.05797941 | 1.06E-07    | 2.64E-06    |
| 219856_at   | 0.003657453 | 0.106494804 | 0.915553726 | 0.955101774 |
| 219857_at   | 0.054027375 | 2.589440965 | 0.012108685 | 0.040786959 |
| 219858_s_at | -0.09477948 | -1.66001683 | 0.10225674  | 0.221393563 |
| 219859_at   | 0.005964454 | 0.22873134  | 0.819874554 | 0.899649723 |
| 219860_at   | -0.08338161 | -1.67520412 | 0.099226138 | 0.216312109 |
| 219861_at   | 0.060075609 | 1.728038295 | 0.089251178 | 0.199730292 |
| 219862_s_at | -0.17795007 | -3.41073916 | 0.001179448 | 0.005849288 |
| 219863_at   | 0.389499195 | 6.481280963 | 2.09E-08    | 7.59E-07    |
| 219864_s_at | -0.00143432 | -0.06432612 | 0.948929618 | 0.973807192 |
| 219865_at   | 0.035272701 | 0.75572779  | 0.452841316 | 0.632133437 |
| 219866_at   | 0.094952867 | 2.340503261 | 0.022684325 | 0.068178066 |
| 219867_at   | -0.04508648 | -0.9287366  | 0.356837699 | 0.539907592 |
| 219868_s_at | 0.054059094 | 1.026593562 | 0.308833352 | 0.489359339 |
| 219869_s_at | -0.11575395 | -2.21945815 | 0.030341674 | 0.085879043 |
| 219870_at   | -0.01626256 | -0.45691404 | 0.649423088 | 0.787519105 |
| 219871_at   | 0.270060137 | 3.596611564 | 0.000663046 | 0.003629251 |
| 219872_at   | 0.001399234 | 0.022010024 | 0.982514778 | 0.991410229 |
| 219873_at   | -0.05257325 | -1.24472359 | 0.218191317 | 0.384686036 |
| 219874_at   | -0.09097611 | -2.17298566 | 0.033839074 | 0.093747577 |
| 219875_s_at | -0.03996434 | -2.48173851 | 0.015963746 | 0.051213247 |
| 219876_s_at | 0.102654912 | 1.947454788 | 0.056279538 | 0.139961334 |
| 219877_at   | -0.48350166 | -6.26268372 | 4.84E-08    | 1.43E-06    |
| 219878_s_at | -0.02100884 | -0.44761325 | 0.656083627 | 0.791849185 |
| 219879_s_at | -0.07147989 | -1.20115375 | 0.234526775 | 0.403366197 |
| 219880_at   | 0.033448787 | 1.155624247 | 0.252527707 | 0.425484195 |
| 219881_s_at | 0.00034395  | 0.016875741 | 0.986593105 | 0.993439507 |
| 219882_at   | 0.278174481 | 2.190079888 | 0.032513483 | 0.090818285 |
| 219883_at   | -0.03047649 | -0.59834831 | 0.551914662 | 0.714485127 |
| 219884_at   | 0.071718542 | 1.507060643 | 0.13717049  | 0.275884234 |
| 219885_at   | 0.055588628 | 1.697564609 | 0.094898317 | 0.209162873 |
| 219886_at   | 0.023832825 | 0.875110855 | 0.385088425 | 0.567701956 |
| 219887_at   | 0.034755273 | 0.918793779 | 0.36197211  | 0.545184428 |
| 219888_at   | 0.020770229 | 0.59919284  | 0.551355215 | 0.714007559 |
| 219889_at   | 0.139233462 | 3.919339601 | 0.000235043 | 0.001513362 |
| 219890_at   | 0.12999785  | 2.559171391 | 0.013096333 | 0.04346512  |
| 219891_at   | 0.025831487 | 0.677544972 | 0.500728161 | 0.673281876 |
| 219892_at   | 0.058689964 | 0.677036953 | 0.501048087 | 0.673489161 |
| 219893_at   | -0.07295089 | -1.28569219 | 0.203610967 | 0.366508827 |
| 219894_at   | -0.43363271 | -5.48749213 | 9.16E-07    | 1.49E-05    |
| 219895_at   | 0.466412718 | 3.788339837 | 0.000360015 | 0.002166852 |
| 219896_at   | -0.86784675 | -6.24123063 | 5.26E-08    | 1.53E-06    |
| 219897_at   | -0.04509201 | -0.86733496 | 0.389298388 | 0.572169283 |
| 219898_at   | -0.06997961 | -2.96186154 | 0.004412022 | 0.017794611 |
| 219899_x_at | 0.040430404 | 0.971903304 | 0.335095706 | 0.517863595 |
| 219900_s_at | 0.065214119 | 2.159127894 | 0.034948244 | 0.09613493  |
| 219901_at   | 0.008037058 | 0.210776418 | 0.833793396 | 0.90821093  |
| 219902_at   | 0.153008625 | 3.361439247 | 0.001370287 | 0.006634378 |
| 219903_s_at | -0.00033662 | -0.01002436 | 0.992035918 | 0.996336531 |
| 219904_at   | -0.07894188 | -2.20042293 | 0.031733762 | 0.089080165 |
| 219905_at   | 0.113348825 | 2.739796219 | 0.008134981 | 0.029488894 |
| 219906_at   | 0.154383343 | 3.342037467 | 0.001453118 | 0.006980684 |
| 219907_at   | 0.035051866 | 0.965707016 | 0.338161695 | 0.520962512 |
| 219908_at   | -0.02654993 | -0.92802608 | 0.357203036 | 0.540314022 |
| 219909_at   | 0.067236931 | 1.841393348 | 0.070629954 | 0.166723256 |
| 219910_at   | 0.148836313 | 4.690507382 | 1.68E-05    | 0.000164464 |

|             |             |             |             |             |
|-------------|-------------|-------------|-------------|-------------|
| 219911_s_at | 0.598435082 | 3.05950968  | 0.003341604 | 0.01406905  |
| 219912_s_at | 7.15E-05    | 0.002282913 | 0.998186259 | 0.999102826 |
| 219913_s_at | -0.24025359 | -3.24108755 | 0.00196605  | 0.008979735 |
| 219914_at   | -0.0298867  | -0.60546024 | 0.547212406 | 0.710772863 |
| 219915_s_at | -0.1579581  | -4.11776246 | 0.000121604 | 0.000870432 |
| 219916_s_at | -0.00878181 | -0.16401548 | 0.870283681 | 0.930028413 |
| 219917_at   | 0.049780068 | 1.243974525 | 0.218464891 | 0.385062033 |
| 219918_s_at | 0.017304137 | 0.84696212  | 0.400463997 | 0.582829782 |
| 219919_s_at | 0.216155635 | 6.076397498 | 9.88E-08    | 2.50E-06    |
| 219920_s_at | 0.061971545 | 1.669694711 | 0.100316925 | 0.218083666 |
| 219921_s_at | 0.049071246 | 1.349004543 | 0.182528296 | 0.339417268 |
| 219922_s_at | 0.548641224 | 4.811764307 | 1.09E-05    | 0.000114542 |
| 219923_at   | 0.073006526 | 2.345387072 | 0.02241518  | 0.06749748  |
| 219924_s_at | 0.065242542 | 1.691462809 | 0.096063632 | 0.211096265 |
| 219925_at   | -0.05536056 | -2.24277659 | 0.028709889 | 0.082213261 |
| 219926_at   | 0.008582961 | 0.20609896  | 0.837428393 | 0.910318149 |
| 219927_at   | -0.0091971  | -0.49953463 | 0.61927432  | 0.766250249 |
| 219928_s_at | -0.00764664 | -0.19479551 | 0.846227208 | 0.91548465  |
| 219929_s_at | -0.00736099 | -0.09874174 | 0.921680514 | 0.958973449 |
| 219930_at   | -0.03819758 | -1.67811472 | 0.098653809 | 0.215337535 |
| 219931_s_at | -0.08725504 | -2.6945444  | 0.009182654 | 0.032586246 |
| 219932_at   | 0.315707894 | 3.222129352 | 0.00207969  | 0.009417927 |
| 219933_at   | -0.24200421 | -4.01009677 | 0.000174209 | 0.001172731 |
| 219934_s_at | 0.00858506  | 0.288684788 | 0.773841935 | 0.87053322  |
| 219935_at   | -0.02667168 | -0.76608405 | 0.446703044 | 0.626559095 |
| 219936_s_at | -0.00199898 | -0.08386339 | 0.933451045 | 0.965421506 |
| 219937_at   | -0.18349774 | -4.01405008 | 0.000171939 | 0.001159891 |
| 219938_s_at | 0.042445017 | 1.678872931 | 0.098505163 | 0.215065596 |
| 219939_s_at | 0.064980547 | 1.459373555 | 0.149805443 | 0.293928565 |
| 219940_s_at | 0.018029917 | 0.474400029 | 0.636978769 | 0.778772679 |
| 219941_at   | 0.036365297 | 0.999098293 | 0.321857248 | 0.503798128 |
| 219942_at   | -0.06226286 | -1.22761949 | 0.224501247 | 0.391639397 |
| 219943_s_at | 0.012929827 | 0.346363214 | 0.730311074 | 0.842733346 |
| 219944_at   | -0.04815142 | -1.12525362 | 0.265071952 | 0.440066705 |
| 219945_at   | -0.25630772 | -4.06320147 | 0.000145984 | 0.001011996 |
| 219946_x_at | 0.049274903 | 1.130099474 | 0.263041413 | 0.43770637  |
| 219947_at   | 0.051814665 | 1.767338063 | 0.082381263 | 0.187702443 |
| 219948_x_at | -0.00666934 | -0.42493662 | 0.672440069 | 0.802903862 |
| 219949_at   | 0.049068417 | 1.786940947 | 0.079122386 | 0.182049921 |
| 219950_s_at | -0.01391712 | -0.25885341 | 0.796655971 | 0.884564216 |
| 219951_s_at | -0.06253228 | -1.21803913 | 0.228093505 | 0.395580961 |
| 219952_s_at | -0.09232725 | -1.89203179 | 0.063433693 | 0.153599102 |
| 219953_s_at | -0.06814078 | -1.83592361 | 0.071446859 | 0.168252872 |
| 219954_s_at | -0.00943783 | -0.28917787 | 0.773466459 | 0.870302912 |
| 219955_at   | 0.001051739 | 0.033047493 | 0.973749086 | 0.986726068 |
| 219956_at   | 0.096529983 | 1.228840342 | 0.22404647  | 0.3912049   |
| 219957_at   | 0.012415551 | 0.259448465 | 0.796199074 | 0.884279121 |
| 219958_at   | -0.23401647 | -4.29323409 | 6.71E-05    | 0.000526198 |
| 219959_at   | -0.03952872 | -1.3985493  | 0.167221377 | 0.31869427  |
| 219960_s_at | -0.16881574 | -2.66433597 | 0.009949315 | 0.034752229 |
| 219961_s_at | -0.06051379 | -1.10673935 | 0.272931817 | 0.448956175 |
| 219962_at   | 0.023949434 | 1.249244339 | 0.216545604 | 0.382644952 |
| 219963_at   | 0.011711196 | 0.350152863 | 0.727480159 | 0.84089963  |
| 219964_at   | 0.024901076 | 0.634121928 | 0.528470376 | 0.696055165 |
| 219965_s_at | 0.004494407 | 0.145598018 | 0.88473869  | 0.9383907   |
| 219966_x_at | 0.342729614 | 4.299187003 | 6.57E-05    | 0.000516943 |
| 219967_at   | 0.004335006 | 0.115391211 | 0.908529776 | 0.951623751 |
| 219968_at   | 0.108071503 | 2.573867855 | 0.012608027 | 0.042141795 |
| 219969_at   | -0.07806277 | -2.43259285 | 0.018065888 | 0.056751294 |
| 219970_at   | 0.032725914 | 1.571364141 | 0.121485468 | 0.251875513 |
| 219971_at   | 0.018806484 | 0.596181762 | 0.553351175 | 0.71579009  |
| 219972_s_at | 0.192553381 | 2.888022724 | 0.005424482 | 0.021064467 |
| 219973_at   | 0.040042966 | 1.823823301 | 0.073282288 | 0.171562703 |
| 219974_x_at | -0.20202043 | -3.33414304 | 0.001488157 | 0.007116277 |
| 219975_x_at | 0.023907848 | 1.065626725 | 0.290965921 | 0.469351366 |
| 219976_at   | -0.06452416 | -1.69138786 | 0.096078018 | 0.211107118 |
| 219977_at   | 0.013919291 | 0.423020772 | 0.673829407 | 0.803916394 |
| 219978_s_at | 0.078631832 | 1.842471706 | 0.070469832 | 0.166473908 |
| 219979_s_at | -0.11634142 | -2.22233006 | 0.030136384 | 0.08543074  |
| 219980_at   | -0.03904241 | -1.16953244 | 0.246926962 | 0.418608904 |
| 219981_x_at | 0.030814508 | 0.796014486 | 0.429238374 | 0.610308349 |
| 219982_s_at | -0.34800818 | -4.92461739 | 7.25E-06    | 8.22E-05    |
| 219983_at   | -0.09537784 | -2.06646523 | 0.043215721 | 0.113771594 |
| 219984_s_at | -0.18905606 | -4.62630209 | 2.11E-05    | 0.000199768 |
| 219985_at   | -0.02790027 | -0.99016151 | 0.326168498 | 0.508313308 |

|             |             |             |             |             |
|-------------|-------------|-------------|-------------|-------------|
| 219986_s_at | 0.014642391 | 0.289576745 | 0.773162762 | 0.870153227 |
| 219987_at   | -0.01224249 | -0.27587351 | 0.783616331 | 0.876348725 |
| 219988_s_at | 0.0024605   | 0.050180385 | 0.960149393 | 0.979658387 |
| 219989_s_at | -0.12271816 | -3.16200229 | 0.00248233  | 0.010927924 |
| 219990_at   | -0.02735684 | -1.20430825 | 0.233315014 | 0.4019937   |
| 219991_at   | 0.026872577 | 0.598959066 | 0.551510048 | 0.714126816 |
| 219992_at   | -0.05734079 | -1.15067433 | 0.254542757 | 0.427803515 |
| 219993_at   | 0.005405192 | 0.131131137 | 0.896120986 | 0.944272726 |
| 219994_at   | 0.043844121 | 1.180835741 | 0.242441371 | 0.413052369 |
| 219995_s_at | -0.01131154 | -0.65964904 | 0.512064825 | 0.682854961 |
| 219996_at   | -0.02780561 | -0.56759608 | 0.572478766 | 0.730716026 |
| 219997_s_at | 0.071138431 | 2.174214567 | 0.03374222  | 0.09354033  |
| 219998_at   | -0.15486064 | -2.43439493 | 0.017984613 | 0.056555608 |
| 219999_at   | 0.113215342 | 2.613204075 | 0.011381313 | 0.038745707 |
| 220000_at   | -0.02189441 | -0.54808978 | 0.585713364 | 0.740919945 |
| 220001_at   | -0.02347307 | -0.81474995 | 0.418516253 | 0.601019517 |
| 220002_at   | 0.012881157 | 0.415373888 | 0.67938612  | 0.80804568  |
| 220003_at   | -0.03137936 | -1.11351741 | 0.270035556 | 0.445773614 |
| 220004_at   | 0.013727912 | 0.658568604 | 0.51275363  | 0.683508374 |
| 220005_at   | -0.0798112  | -1.02719788 | 0.308551169 | 0.489033579 |
| 220006_at   | -0.01945267 | -0.3120138  | 0.756138167 | 0.859741384 |
| 220007_at   | -0.05330166 | -1.49352648 | 0.140667676 | 0.280934266 |
| 220008_at   | 0.000898074 | 0.0173114   | 0.986247032 | 0.993381992 |
| 220009_at   | -0.04264741 | -0.91374739 | 0.364596111 | 0.547954716 |
| 220010_at   | 0.012420904 | 0.2219477   | 0.825126722 | 0.902929983 |
| 220011_at   | 0.026505358 | 0.582032699 | 0.562778548 | 0.723623307 |
| 220012_at   | -0.00573108 | -0.15587877 | 0.876664632 | 0.933899739 |
| 220013_at   | 0.05499238  | 1.445048729 | 0.153773746 | 0.299492581 |
| 220014_at   | -0.02685972 | -1.01833959 | 0.312704998 | 0.493725885 |
| 220015_at   | 0.039848177 | 1.178075871 | 0.243531134 | 0.414340393 |
| 220016_at   | 0.203350732 | 3.111074947 | 0.002879463 | 0.012397782 |
| 220017_x_at | -0.02447743 | -0.4344502  | 0.665558063 | 0.798505301 |
| 220018_at   | -0.00085868 | -0.04280388 | 0.96600347  | 0.982693116 |
| 220019_s_at | 0.042786464 | 1.521205669 | 0.133589346 | 0.270544456 |
| 220020_at   | 0.204628436 | 4.995778789 | 5.61E-06    | 6.61E-05    |
| 220021_at   | -0.06696748 | -2.35084729 | 0.022117644 | 0.066829947 |
| 220022_at   | 0.045715081 | 1.698557204 | 0.094709855 | 0.208868752 |
| 220023_at   | 0.046876178 | 1.5885881   | 0.117537917 | 0.245869626 |
| 220024_s_at | 0.00378047  | 0.074147629 | 0.941145593 | 0.969364128 |
| 220025_at   | -0.0289743  | -0.73030284 | 0.468116437 | 0.645174077 |
| 220026_at   | 0.204998058 | 2.449689844 | 0.017307917 | 0.054762861 |
| 220027_s_at | 0.152880954 | 3.236888352 | 0.001990705 | 0.009079355 |
| 220028_at   | 0.259607516 | 6.206414341 | 6.01E-08    | 1.70E-06    |
| 220029_at   | -0.21093777 | -4.38101741 | 4.96E-05    | 0.000408783 |
| 220030_at   | -0.31539931 | -4.84477972 | 9.67E-06    | 0.000103926 |
| 220031_at   | -0.010597   | -0.30979342 | 0.757817683 | 0.860754736 |
| 220032_at   | 0.060600373 | 1.667612017 | 0.100731815 | 0.21877278  |
| 220033_at   | 0.003293139 | 0.089073029 | 0.929327774 | 0.963185382 |
| 220034_at   | 0.019059217 | 0.478545219 | 0.634043908 | 0.776837194 |
| 220035_at   | 0.114073334 | 2.232664988 | 0.029407718 | 0.083764044 |
| 220036_s_at | 0.022772351 | 0.499677467 | 0.619174338 | 0.766186653 |
| 220037_s_at | 0.003648502 | 0.065323109 | 0.948139213 | 0.973449063 |
| 220038_at   | -0.03063676 | -0.3445985  | 0.731630626 | 0.843472009 |
| 220039_s_at | -0.00399907 | -0.18958663 | 0.850288606 | 0.917790082 |
| 220040_x_at | 0.010455423 | 0.333541903 | 0.739916519 | 0.849103841 |
| 220041_at   | -0.08287741 | -2.00567985 | 0.049517422 | 0.126545782 |
| 220042_x_at | 0.036383368 | 1.119861674 | 0.267344309 | 0.442638901 |
| 220043_s_at | 0.054948007 | 1.081373878 | 0.283963521 | 0.461487188 |
| 220044_x_at | 0.317476935 | 3.882913575 | 0.000264818 | 0.00167259  |
| 220045_at   | -0.09435577 | -2.16824191 | 0.034215238 | 0.094581128 |
| 220046_s_at | 0.166251179 | 2.241719425 | 0.028782156 | 0.082377977 |
| 220047_at   | 0.057814055 | 1.301533596 | 0.198172472 | 0.35931373  |
| 220048_at   | 0.071712039 | 1.877127336 | 0.065484285 | 0.157531686 |
| 220049_s_at | -0.00063945 | -0.01702976 | 0.986470758 | 0.993419155 |
| 220050_at   | 0.056544602 | 1.313421676 | 0.194163305 | 0.354142205 |
| 220051_at   | -0.02265265 | -0.51150114 | 0.610923375 | 0.759876625 |
| 220052_s_at | 0.009547488 | 0.225615471 | 0.822285972 | 0.901251124 |
| 220053_at   | -0.01518435 | -0.4076953  | 0.68498391  | 0.811657897 |
| 220054_at   | -0.03244438 | -0.7754211  | 0.441210728 | 0.621527487 |
| 220055_at   | 0.007846302 | 0.188947121 | 0.850787516 | 0.918122108 |
| 220056_at   | 0.075041089 | 2.002278851 | 0.049892258 | 0.127241771 |
| 220057_at   | -0.04921668 | -1.07261659 | 0.287843115 | 0.466046607 |
| 220058_at   | -0.0933122  | -1.92713727 | 0.058817929 | 0.144648152 |
| 220059_at   | 0.034686632 | 0.842684291 | 0.402833364 | 0.585163809 |
| 220060_s_at | -0.00728389 | -0.38417182 | 0.702242435 | 0.824154274 |

|             |             |             |             |             |
|-------------|-------------|-------------|-------------|-------------|
| 220061_at   | 0.106008798 | 1.89727597  | 0.062725248 | 0.152354174 |
| 220062_s_at | 0.029983819 | 1.198917453 | 0.23538859  | 0.404381582 |
| 220063_at   | -0.00985147 | -0.4677457  | 0.641702366 | 0.782359771 |
| 220064_at   | -0.00622949 | -0.19356666 | 0.847184976 | 0.916010813 |
| 220065_at   | -0.01147578 | -0.29928838 | 0.765779552 | 0.865471873 |
| 220066_at   | 0.052034865 | 1.239500708 | 0.220104089 | 0.387035409 |
| 220067_at   | 0.004421053 | 0.112063594 | 0.91115619  | 0.952978153 |
| 220068_at   | -0.0372132  | -0.91898279 | 0.361874065 | 0.545095642 |
| 220069_at   | -0.08439236 | -1.69138898 | 0.096077804 | 0.211107118 |
| 220070_at   | 0.038093132 | 1.539484837 | 0.12907191  | 0.263762314 |
| 220071_x_at | 0.314488725 | 5.007564888 | 5.37E-06    | 6.39E-05    |
| 220072_at   | 0.181850388 | 2.670003988 | 0.009801153 | 0.034339379 |
| 220073_s_at | -0.07604913 | -1.71785656 | 0.091106281 | 0.202835605 |
| 220074_at   | 0.027189952 | 0.504118626 | 0.616069293 | 0.763839784 |
| 220075_s_at | -0.04221788 | -0.76885279 | 0.445070245 | 0.62526969  |
| 220076_at   | -0.32171303 | -5.70772519 | 4.01E-07    | 7.58E-06    |
| 220077_at   | 0.003574825 | 0.075003243 | 0.94046774  | 0.968911577 |
| 220078_at   | -0.04394358 | -1.70821676 | 0.092891838 | 0.205857193 |
| 220079_s_at | -0.21590139 | -3.62627113 | 0.000603922 | 0.003354522 |
| 220080_at   | -0.00796418 | -0.31175037 | 0.756337366 | 0.859779462 |
| 220081_x_at | 0.306752281 | 5.589216727 | 6.26E-07    | 1.08E-05    |
| 220082_at   | 0.024725204 | 0.615863619 | 0.540370738 | 0.705961853 |
| 220083_x_at | -0.06548192 | -2.52662249 | 0.014239397 | 0.046502531 |
| 220084_at   | -0.00509132 | -0.24862679 | 0.804519272 | 0.88985733  |
| 220085_at   | 0.076418338 | 1.847934019 | 0.069663435 | 0.165135278 |
| 220086_at   | 0.022572679 | 0.657120808 | 0.513677409 | 0.684331558 |
| 220087_at   | 0.001306971 | 0.037124016 | 0.970512374 | 0.985126599 |
| 220088_at   | 0.220690133 | 3.244717404 | 0.00194497  | 0.008902558 |
| 220089_at   | 0.017031074 | 0.561343075 | 0.576705403 | 0.733928979 |
| 220090_at   | -0.00972512 | -0.18830009 | 0.851292361 | 0.918407719 |
| 220091_at   | -0.05222445 | -1.22791351 | 0.224391659 | 0.391494068 |
| 220092_s_at | 0.09187402  | 3.366793931 | 0.001348225 | 0.006549443 |
| 220093_at   | -0.00649437 | -0.16733577 | 0.867682318 | 0.928358386 |
| 220094_s_at | 0.420709599 | 4.393615404 | 4.75E-05    | 0.000394135 |
| 220095_at   | -0.03088952 | -0.91702433 | 0.362890796 | 0.546027653 |
| 220096_at   | -0.01666033 | -0.3111448  | 0.756795349 | 0.860106023 |
| 220097_s_at | 0.025303778 | 0.462819605 | 0.645208789 | 0.784665465 |
| 220098_at   | 0.013623697 | 0.494332615 | 0.622920462 | 0.768426738 |
| 220099_s_at | 0.03465603  | 0.658286671 | 0.512933451 | 0.683618614 |
| 220100_at   | -0.07003202 | -1.55721407 | 0.124807496 | 0.257212529 |
| 220101_x_at | 0.030651312 | 0.803537766 | 0.424913326 | 0.606309708 |
| 220102_at   | 0.044434427 | 2.008916579 | 0.049162944 | 0.125805341 |
| 220103_s_at | -0.08584786 | -3.13300078 | 0.002701696 | 0.011766147 |
| 220104_at   | 0.030657966 | 1.028801823 | 0.30780307  | 0.488194151 |
| 220105_at   | 0.00107052  | 0.024930653 | 0.98019503  | 0.990053027 |
| 220106_at   | 0.073408544 | 1.6871827   | 0.096888032 | 0.212489936 |
| 220107_s_at | 0.251947698 | 3.891852935 | 0.000257192 | 0.001632497 |
| 220108_at   | 0.041421747 | 0.652362129 | 0.516719973 | 0.686418871 |
| 220109_at   | 0.062866343 | 1.973460313 | 0.053167517 | 0.133823084 |
| 220110_s_at | -0.02069688 | -0.52317428 | 0.602826874 | 0.753757061 |
| 220111_s_at | -0.12334382 | -2.54595014 | 0.013550213 | 0.044692704 |
| 220112_at   | -0.03220403 | -0.864703   | 0.390729841 | 0.573537559 |
| 220113_x_at | 0.370885512 | 5.49966107  | 8.75E-07    | 1.43E-05    |
| 220114_s_at | -0.06267007 | -1.06825435 | 0.289789266 | 0.468010764 |
| 220115_s_at | -0.05039807 | -1.0005519  | 0.32115963  | 0.503040907 |
| 220116_at   | 0.424748052 | 4.26963748  | 7.27E-05    | 0.000564264 |
| 220117_at   | -0.07559284 | -1.64149627 | 0.106054286 | 0.227598627 |
| 220118_at   | -0.00130363 | -0.02793489 | 0.977809055 | 0.988782747 |
| 220119_at   | -0.12717851 | -1.76134162 | 0.083400162 | 0.189463733 |
| 220120_s_at | -0.05299459 | -1.99368388 | 0.050850432 | 0.129184147 |
| 220121_at   | -0.00158426 | -0.06455641 | 0.948747039 | 0.973702533 |
| 220122_at   | -0.97600336 | -4.20400497 | 9.09E-05    | 0.000680192 |
| 220123_at   | -0.00571629 | -0.34112962 | 0.734226832 | 0.845222305 |
| 220124_at   | 0.0401213   | 1.828913642 | 0.072505396 | 0.170115892 |
| 220125_at   | 0.181678591 | 2.176933812 | 0.033528771 | 0.09304364  |
| 220126_at   | 0.027590506 | 0.525762063 | 0.601038711 | 0.752416643 |
| 220127_s_at | 0.116577155 | 3.195122248 | 0.002252287 | 0.010083063 |
| 220128_s_at | -0.06684936 | -1.48631739 | 0.142558984 | 0.283654918 |
| 220129_at   | -0.13626309 | -2.93083376 | 0.004813957 | 0.019123361 |
| 220130_x_at | -0.06087564 | -0.83335941 | 0.408027933 | 0.590224766 |
| 220131_at   | -0.8587857  | -8.24258117 | 2.24E-11    | 9.22E-09    |
| 220132_s_at | 0.015016655 | 0.931875515 | 0.355226602 | 0.538344772 |
| 220133_at   | 0.025065156 | 0.515826818 | 0.607917311 | 0.757494088 |
| 220134_x_at | 0.032478197 | 0.652711084 | 0.516496536 | 0.686286998 |
| 220135_s_at | 0.063291264 | 1.282594631 | 0.204687292 | 0.367828084 |

|             |             |             |             |             |
|-------------|-------------|-------------|-------------|-------------|
| 220136_s_at | -0.02361461 | -0.5051745  | 0.615332112 | 0.763328136 |
| 220137_at   | 0.155064769 | 4.729548454 | 1.46E-05    | 0.000146397 |
| 220138_at   | 0.018524073 | 0.338790007 | 0.735979622 | 0.846449341 |
| 220139_at   | -0.03538555 | -1.11018401 | 0.271457201 | 0.447376844 |
| 220140_s_at | 0.040847518 | 1.325112809 | 0.190280414 | 0.349104353 |
| 220141_at   | 0.084245625 | 1.539307067 | 0.12911525  | 0.26378868  |
| 220142_at   | 0.304434113 | 4.259974793 | 7.51E-05    | 0.00058016  |
| 220143_x_at | 0.036621392 | 0.942873876 | 0.349618751 | 0.532682003 |
| 220144_s_at | 0.003871877 | 0.135567266 | 0.892628269 | 0.942525696 |
| 220145_at   | -0.12111375 | -3.03515859 | 0.003583141 | 0.014924301 |
| 220146_at   | 0.06780225  | 2.006578192 | 0.049418818 | 0.126337137 |
| 220147_s_at | -0.17283179 | -3.29618527 | 0.001668069 | 0.007828345 |
| 220148_at   | 0.041355511 | 0.589397994 | 0.557861213 | 0.719705218 |
| 220149_at   | -0.00110176 | -0.02820382 | 0.977595481 | 0.988734499 |
| 220150_s_at | 0.059065202 | 1.361048628 | 0.178712564 | 0.334310908 |
| 220151_at   | -0.04264624 | -1.27856468 | 0.206093947 | 0.369481314 |
| 220152_at   | -0.02806292 | -0.4748531  | 0.636657699 | 0.778566899 |
| 220153_at   | 0.004257677 | 0.115260443 | 0.908632969 | 0.951648153 |
| 220154_at   | -0.01599036 | -0.48431512 | 0.629968542 | 0.773944529 |
| 220155_s_at | 0.074109176 | 1.577464198 | 0.120075405 | 0.249644776 |
| 220156_at   | 0.47335805  | 3.042054911 | 0.003513133 | 0.014676079 |
| 220157_x_at | 0.010956313 | 0.35452039  | 0.724222292 | 0.838818249 |
| 220158_at   | -0.00399915 | -0.09103215 | 0.927777685 | 0.962248272 |
| 220159_at   | -0.12400611 | -3.52378781 | 0.000832512 | 0.004373646 |
| 220160_s_at | -0.06446655 | -1.23946802 | 0.2201161   | 0.387041301 |
| 220161_s_at | 0.010351905 | 0.307361583 | 0.759658486 | 0.861565586 |
| 220162_s_at | 0.035710573 | 1.021027491 | 0.311440615 | 0.492390829 |
| 220163_s_at | 0.006355746 | 0.158681435 | 0.874465782 | 0.932452518 |
| 220164_s_at | -0.02569421 | -0.52040138 | 0.60474567  | 0.754890282 |
| 220165_at   | 0.034337009 | 0.612294707 | 0.542712841 | 0.707426814 |
| 220166_at   | -0.52090843 | -4.56657821 | 2.60E-05    | 0.000238328 |
| 220167_s_at | -0.00665147 | -0.13338316 | 0.894347632 | 0.943580778 |
| 220168_at   | 0.240238189 | 2.50703408  | 0.014970093 | 0.048506009 |
| 220169_at   | -0.01685943 | -0.78939024 | 0.433068222 | 0.613908237 |
| 220170_at   | 0.043532652 | 1.391948169 | 0.169201781 | 0.321307244 |
| 220171_x_at | -0.01804211 | -0.69569874 | 0.489369035 | 0.66373952  |
| 220172_at   | -0.02324545 | -0.7252428  | 0.471191043 | 0.647574344 |
| 220173_at   | 0.026953255 | 0.351355873 | 0.726582291 | 0.840375593 |
| 220174_at   | 0.000903013 | 0.027827802 | 0.9778941   | 0.988801627 |
| 220175_s_at | -0.11897619 | -2.03705476 | 0.046172319 | 0.119900139 |
| 220176_at   | 0.039136759 | 1.034999628 | 0.304923909 | 0.484942687 |
| 220177_s_at | 0.109963601 | 2.307102178 | 0.024603508 | 0.072786125 |
| 220178_at   | 0.178249659 | 3.471957275 | 0.000977425 | 0.005000925 |
| 220179_at   | 0.017091999 | 0.433971834 | 0.665903422 | 0.798801621 |
| 220180_at   | 2.34E-05    | 0.000507152 | 0.999597075 | 0.999776037 |
| 220181_x_at | -0.07308174 | -2.16225705 | 0.034695042 | 0.095632836 |
| 220182_at   | -0.28368822 | -2.20697671 | 0.031248253 | 0.087971461 |
| 220183_s_at | -0.00683307 | -0.18310595 | 0.855347305 | 0.92082627  |
| 220184_at   | -0.26362662 | -3.57531558 | 0.000708859 | 0.003832144 |
| 220185_at   | -0.19976929 | -3.98182575 | 0.000191312 | 0.001269299 |
| 220186_s_at | 0.021978248 | 0.808628945 | 0.422001337 | 0.604005885 |
| 220187_at   | 0.010155164 | 0.618546978 | 0.538613201 | 0.704716353 |
| 220188_at   | -0.82172701 | -7.97849737 | 6.24E-11    | 1.62E-08    |
| 220189_s_at | -0.08405975 | -2.19184812 | 0.032379002 | 0.09053318  |
| 220190_s_at | 0.005800399 | 0.312437468 | 0.755817838 | 0.859599674 |
| 220191_at   | -0.02563726 | -0.67879857 | 0.499939184 | 0.67258525  |
| 220192_x_at | -0.02997081 | -0.97002853 | 0.33602142  | 0.518845678 |
| 220193_at   | -0.09673659 | -1.66240403 | 0.101775432 | 0.220642619 |
| 220194_at   | 0.012032462 | 0.287548349 | 0.774707524 | 0.871045119 |
| 220195_at   | 0.144954855 | 3.980171432 | 0.000192362 | 0.001274559 |
| 220196_at   | 0.002760224 | 0.103555154 | 0.917876173 | 0.956525001 |
| 220197_at   | -0.06479055 | -1.71232385 | 0.092127598 | 0.20457948  |
| 220198_s_at | 0.004399178 | 0.20487597  | 0.838379407 | 0.910715049 |
| 220199_s_at | 0.061422838 | 0.639916829 | 0.524722204 | 0.693238877 |
| 220200_s_at | 0.023113523 | 0.492789488 | 0.624003887 | 0.769256029 |
| 220201_at   | 0.061348839 | 1.796537055 | 0.077566713 | 0.179264223 |
| 220202_s_at | -0.27770034 | -4.99798858 | 5.56E-06    | 6.57E-05    |
| 220203_at   | -0.06488137 | -2.19591966 | 0.032071201 | 0.089863708 |
| 220204_s_at | 0.000145332 | 0.00360068  | 0.997139316 | 0.998640408 |
| 220205_at   | -0.02868369 | -1.12631943 | 0.264624404 | 0.439519617 |
| 220206_at   | 0.142931993 | 3.777387436 | 0.000372958 | 0.002232251 |
| 220207_at   | -0.08021887 | -1.97366405 | 0.05314373  | 0.13377828  |
| 220208_at   | 0.006833376 | 0.248863726 | 0.804336859 | 0.889728839 |
| 220209_at   | -0.02111726 | -0.39167536 | 0.696719641 | 0.820495235 |
| 220210_at   | 0.020859296 | 0.630413961 | 0.530876025 | 0.698046914 |

|             |             |             |             |             |
|-------------|-------------|-------------|-------------|-------------|
| 220211_at   | -0.02205516 | -0.70239463 | 0.485215501 | 0.660069132 |
| 220212_s_at | 0.101667052 | 3.134267798 | 0.002691744 | 0.011726235 |
| 220213_at   | -0.00142053 | -0.0287949  | 0.977126071 | 0.988539442 |
| 220214_at   | -0.05180112 | -1.26237194 | 0.211818661 | 0.376840078 |
| 220215_at   | 0.07785464  | 1.614058121 | 0.111890407 | 0.236916951 |
| 220216_at   | -0.00439956 | -0.10169654 | 0.919344932 | 0.957501892 |
| 220217_x_at | -0.05649608 | -1.41824459 | 0.161418715 | 0.31027161  |
| 220218_at   | 0.049261111 | 0.993018609 | 0.324786018 | 0.507023633 |
| 220219_s_at | -0.06931997 | -1.31828407 | 0.192541209 | 0.352132083 |
| 220220_at   | -0.04234294 | -0.77535368 | 0.441250247 | 0.621544252 |
| 220221_at   | 0.122752984 | 2.388618952 | 0.020154148 | 0.061969673 |
| 220222_at   | -0.03936408 | -0.78291407 | 0.436831996 | 0.617383327 |
| 220223_at   | -0.01330375 | -0.3738245  | 0.709884803 | 0.829507454 |
| 220224_at   | -0.02762818 | -0.6123279  | 0.542691036 | 0.707421548 |
| 220225_at   | -0.00605032 | -0.14952446 | 0.88165353  | 0.936713647 |
| 220226_at   | -0.00441859 | -0.10826464 | 0.91415584  | 0.954254927 |
| 220227_at   | -0.22704271 | -3.59107795 | 0.000674671 | 0.003681161 |
| 220228_at   | 0.00468133  | 0.137852939 | 0.890829508 | 0.941603946 |
| 220229_s_at | -0.0237182  | -1.09678315 | 0.277225498 | 0.453845127 |
| 220230_s_at | 0.026886116 | 0.207336347 | 0.836466432 | 0.909858539 |
| 220231_at   | -0.03491826 | -0.93086072 | 0.355746946 | 0.538822737 |
| 220232_at   | 0.066606337 | 1.257106491 | 0.213705359 | 0.379165075 |
| 220233_at   | -0.03506192 | -0.78017985 | 0.438426835 | 0.618893623 |
| 220234_at   | 0.097866621 | 1.416880958 | 0.16181538  | 0.310846892 |
| 220235_s_at | -0.16669207 | -2.23357963 | 0.029343986 | 0.083637847 |
| 220236_at   | -0.05592748 | -1.23560836 | 0.221537585 | 0.388530944 |
| 220237_at   | 0.029071391 | 1.337222004 | 0.186320818 | 0.344064539 |
| 220238_s_at | -0.04304559 | -1.38709592 | 0.170668973 | 0.323324623 |
| 220239_at   | 0.071079564 | 1.705749448 | 0.093353454 | 0.206643457 |
| 220240_s_at | -0.05146176 | -1.20763135 | 0.232043413 | 0.40041439  |
| 220241_at   | -0.01613723 | -0.71369233 | 0.478252027 | 0.653780307 |
| 220242_x_at | 0.122727676 | 4.682602032 | 1.73E-05    | 0.000168403 |
| 220243_at   | 0.111718714 | 2.756917438 | 0.007768064 | 0.028382137 |
| 220244_at   | 0.079161688 | 1.601084191 | 0.114739092 | 0.241427471 |
| 220245_at   | 0.070924798 | 1.80307515  | 0.076521494 | 0.177316254 |
| 220246_at   | -0.43785835 | -7.08543536 | 2.01E-09    | 1.46E-07    |
| 220247_at   | -0.00190192 | -0.08686979 | 0.931071342 | 0.964097603 |
| 220248_x_at | -0.09364175 | -2.39275422 | 0.019948949 | 0.061448646 |
| 220249_at   | -0.02399427 | -0.58321173 | 0.561989946 | 0.723149528 |
| 220250_at   | -0.03844603 | -1.15506439 | 0.252755046 | 0.425733836 |
| 220251_at   | -0.26834476 | -5.19808007 | 2.68E-06    | 3.60E-05    |
| 220252_x_at | 0.061714457 | 1.832776034 | 0.07192054  | 0.169163348 |
| 220253_s_at | -0.24327405 | -4.26333319 | 7.43E-05    | 0.000574443 |
| 220254_at   | -0.08138097 | -4.38001045 | 4.98E-05    | 0.00040998  |
| 220255_at   | 0.091717577 | 2.246505801 | 0.028456241 | 0.081636654 |
| 220256_s_at | -0.02607669 | -0.69423492 | 0.490279666 | 0.664611157 |
| 220257_x_at | 0.028043795 | 0.799307323 | 0.427342138 | 0.60859011  |
| 220258_s_at | 0.143278882 | 3.220527215 | 0.002089572 | 0.009455012 |
| 220259_at   | -0.00207041 | -0.04922648 | 0.960906308 | 0.980117416 |
| 220260_at   | 0.069892564 | 1.754750952 | 0.084532085 | 0.191567768 |
| 220261_s_at | -0.04504886 | -0.80479503 | 0.424193096 | 0.605726814 |
| 220262_s_at | -0.11141897 | -2.86642941 | 0.005758927 | 0.022143851 |
| 220263_at   | 0.069192542 | 1.673869627 | 0.099489454 | 0.216790964 |
| 220264_s_at | 0.009576948 | 0.32627105  | 0.745382343 | 0.852617739 |
| 220265_at   | 0.016588736 | 0.534164018 | 0.595249965 | 0.748134408 |
| 220266_s_at | 0.116701825 | 2.333145201 | 0.023095264 | 0.069194447 |
| 220267_at   | 1.18E-05    | 0.000409332 | 0.999674791 | 0.999822772 |
| 220268_at   | 0.035681975 | 1.682990953 | 0.097701029 | 0.21374207  |
| 220269_at   | 0.472740871 | 2.61419813  | 0.011351771 | 0.038662807 |
| 220270_at   | 0.015886609 | 0.586082737 | 0.560071943 | 0.721575579 |
| 220271_x_at | 0.073237917 | 2.166253082 | 0.034374032 | 0.09490605  |
| 220272_at   | 0.128309665 | 2.799303923 | 0.006924175 | 0.025813748 |
| 220273_at   | 0.094144839 | 3.808107147 | 0.000337737 | 0.002055448 |
| 220274_at   | 0.220636208 | 3.013323877 | 0.003813474 | 0.015753005 |
| 220275_at   | -0.01594899 | -0.27042671 | 0.78778272  | 0.878827451 |
| 220276_at   | -0.02779326 | -0.45724905 | 0.649183708 | 0.787292909 |
| 220277_at   | 0.074840635 | 1.66325806  | 0.101603691 | 0.220355809 |
| 220278_at   | 0.037006622 | 1.82758379  | 0.072707689 | 0.170485416 |
| 220279_at   | -0.17418826 | -3.06856636 | 0.003255717 | 0.013765798 |
| 220280_s_at | 0.08879145  | 2.990454044 | 0.004069468 | 0.01663064  |
| 220281_at   | -0.02716929 | -1.39917791 | 0.167033721 | 0.318434973 |
| 220282_at   | -0.07486279 | -1.74848691 | 0.0856197   | 0.193483117 |
| 220283_at   | 0.077069589 | 1.519957084 | 0.133902439 | 0.270977388 |
| 220284_at   | 0.007764607 | 0.120353954 | 0.904614706 | 0.949437489 |
| 220285_at   | -0.10210729 | -1.2521283  | 0.215500539 | 0.381401625 |

|             |             |             |             |             |
|-------------|-------------|-------------|-------------|-------------|
| 220286_at   | 0.077015145 | 2.160186099 | 0.034862436 | 0.09595812  |
| 220287_at   | 0.131150362 | 1.882337331 | 0.064761196 | 0.156162046 |
| 220288_at   | 0.031758701 | 0.811884434 | 0.420145609 | 0.602275271 |
| 220289_s_at | 0.04176272  | 1.233424317 | 0.222344937 | 0.389428222 |
| 220290_at   | -0.01491814 | -0.43519007 | 0.665024049 | 0.798207461 |
| 220291_at   | 0.157928129 | 3.729605681 | 0.000434828 | 0.002544627 |
| 220292_at   | 0.008101013 | 0.207736464 | 0.836155429 | 0.909586662 |
| 220293_at   | -0.04582952 | -1.38000155 | 0.172831697 | 0.32631371  |
| 220294_at   | -0.39277773 | -6.45258362 | 2.33E-08    | 8.24E-07    |
| 220295_x_at | -0.00279456 | -0.05705236 | 0.95469769  | 0.976721173 |
| 220296_at   | 0.095319768 | 2.389451725 | 0.020112673 | 0.061863427 |
| 220297_at   | -0.05926159 | -1.87560318 | 0.065697108 | 0.157899174 |
| 220298_s_at | 0.173372744 | 3.594743324 | 0.000666949 | 0.003646597 |
| 220299_at   | 0.092756525 | 1.566118839 | 0.122708545 | 0.253881315 |
| 220300_at   | 0.038257487 | 1.2589722   | 0.213035426 | 0.378357148 |
| 220301_at   | 0.029706113 | 1.54803016  | 0.127002222 | 0.260702741 |
| 220302_at   | 0.292634578 | 3.279552144 | 0.001753209 | 0.008167873 |
| 220303_at   | 0.092927649 | 2.391151467 | 0.020028257 | 0.061641958 |
| 220304_s_at | -0.00835294 | -0.19693946 | 0.844556774 | 0.914474412 |
| 220305_at   | 0.253624259 | 3.548780245 | 0.000770172 | 0.004106481 |
| 220306_at   | 0.057641926 | 1.391196795 | 0.169428339 | 0.321587163 |
| 220307_at   | 0.013944736 | 0.341295856 | 0.734102342 | 0.8451743   |
| 220308_at   | 0.269782056 | 3.078036752 | 0.003168115 | 0.013441181 |
| 220309_at   | -0.01921395 | -0.43999287 | 0.661561794 | 0.795675871 |
| 220310_at   | 0.006635812 | 0.236112353 | 0.814169283 | 0.89585281  |
| 220311_at   | 0.051615254 | 1.985252708 | 0.051805663 | 0.131126391 |
| 220312_at   | -0.02771912 | -0.6119872  | 0.542914884 | 0.707576742 |
| 220313_at   | -1.60243802 | -7.99477108 | 5.86E-11    | 1.57E-08    |
| 220314_at   | 0.006325333 | 0.17400809  | 0.86245919  | 0.925184247 |
| 220315_at   | -0.01934833 | -0.61618441 | 0.54016047  | 0.705749042 |
| 220316_at   | 0.603396997 | 8.109406745 | 3.76E-11    | 1.23E-08    |
| 220317_at   | 0.036949404 | 1.231819804 | 0.222939436 | 0.390072007 |
| 220318_at   | -0.03071582 | -0.76762691 | 0.445792745 | 0.62587156  |
| 220319_s_at | 0.175468386 | 2.601449788 | 0.011735981 | 0.039735186 |
| 220320_at   | 0.016997233 | 0.378036151 | 0.706770476 | 0.827209273 |
| 220321_s_at | 0.079875416 | 3.279687044 | 0.001752502 | 0.008165432 |
| 220322_at   | -0.0117617  | -0.386573   | 0.700473331 | 0.823007364 |
| 220323_at   | 0.062103891 | 1.330417342 | 0.188538124 | 0.346783514 |
| 220324_at   | -0.01754668 | -0.76055246 | 0.449975621 | 0.629389807 |
| 220325_at   | -0.01525985 | -0.57644923 | 0.566520517 | 0.726654176 |
| 220326_s_at | 0.311473148 | 7.169915656 | 1.45E-09    | 1.18E-07    |
| 220327_at   | -0.06387543 | -3.5710131  | 0.000718474 | 0.003878851 |
| 220328_at   | 0.030332436 | 1.490708309 | 0.141404655 | 0.282014228 |
| 220329_s_at | -0.03339305 | -1.21136168 | 0.23062201  | 0.398763694 |
| 220330_s_at | 0.120779594 | 2.116921939 | 0.038524802 | 0.103751157 |
| 220331_at   | -0.87663023 | -6.84221676 | 5.17E-09    | 2.83E-07    |
| 220332_at   | 0.033748706 | 0.777096235 | 0.440229582 | 0.620769836 |
| 220333_at   | 0.002667238 | 0.122848075 | 0.902648006 | 0.948269055 |
| 220334_at   | -0.61147806 | -7.12813398 | 1.70E-09    | 1.31E-07    |
| 220335_x_at | 0.056307688 | 1.721576505 | 0.090424856 | 0.201639939 |
| 220336_s_at | -0.02363422 | -1.2017046  | 0.234314846 | 0.403147056 |
| 220337_at   | 0.0057584   | 0.140077223 | 0.889079613 | 0.940578674 |
| 220338_at   | -0.02802646 | -1.25490733 | 0.214497027 | 0.380197554 |
| 220339_s_at | 0.003273785 | 0.097416144 | 0.922728545 | 0.959572416 |
| 220340_at   | 0.006439606 | 0.142284656 | 0.887343522 | 0.939453645 |
| 220341_s_at | 0.112745722 | 3.082315902 | 0.00312926  | 0.013308257 |
| 220342_x_at | -0.04035457 | -0.91269063 | 0.36514714  | 0.548513312 |
| 220343_at   | -0.08147494 | -1.55618915 | 0.125050912 | 0.257642235 |
| 220344_at   | 0.040812169 | 0.872355922 | 0.386576702 | 0.569273649 |
| 220345_at   | -0.15009668 | -5.16381475 | 3.04E-06    | 3.99E-05    |
| 220346_at   | 0.084623143 | 2.142850517 | 0.036291628 | 0.099092464 |
| 220347_at   | 0.060569116 | 1.104072837 | 0.274077169 | 0.450299862 |
| 220348_at   | -0.06778561 | -1.69878036 | 0.094667527 | 0.208808789 |
| 220349_s_at | 0.181122494 | 4.687642763 | 1.69E-05    | 0.000165678 |
| 220350_at   | 0.013372892 | 0.419253304 | 0.676564831 | 0.805896685 |
| 220351_at   | 0.058912334 | 1.772239614 | 0.081556113 | 0.186440196 |
| 220352_x_at | 0.109042971 | 2.198973388 | 0.031842037 | 0.08932239  |
| 220353_at   | 0.00840149  | 0.253738988 | 0.800585887 | 0.887307422 |
| 220354_at   | -0.03359924 | -1.03362136 | 0.305562585 | 0.485580794 |
| 220355_s_at | 0.241233978 | 5.052032983 | 4.57E-06    | 5.61E-05    |
| 220356_at   | -0.04413474 | -1.787943   | 0.078958731 | 0.18175276  |
| 220357_s_at | 0.095613224 | 2.616426322 | 0.011285806 | 0.038470386 |
| 220358_at   | -0.2914272  | -6.23907283 | 5.30E-08    | 1.53E-06    |
| 220359_s_at | -1.28953408 | -5.76950321 | 3.17E-07    | 6.26E-06    |
| 220360_at   | 0.012160964 | 0.609946397 | 0.544256749 | 0.708697705 |

|             |             |             |             |             |
|-------------|-------------|-------------|-------------|-------------|
| 220361_at   | 0.090423791 | 2.699100445 | 0.009071837 | 0.032254458 |
| 220362_at   | -0.00511036 | -0.15464109 | 0.877635969 | 0.934578063 |
| 220363_s_at | -0.19178932 | -3.22190255 | 0.002081087 | 0.00942234  |
| 220364_at   | -0.10204271 | -3.55243897 | 0.000761428 | 0.004069154 |
| 220365_at   | -0.07985501 | -1.74593309 | 0.086066431 | 0.1943064   |
| 220366_at   | 0.0346821   | 0.795128844 | 0.429749241 | 0.610663895 |
| 220367_s_at | 0.025593723 | 0.835315505 | 0.406934881 | 0.589292129 |
| 220368_s_at | 0.085995507 | 1.653370201 | 0.103606628 | 0.223636195 |
| 220369_at   | -0.0201909  | -0.59249303 | 0.555801274 | 0.718122883 |
| 220370_s_at | -0.03646918 | -0.89863025 | 0.372529411 | 0.555636245 |
| 220371_s_at | 0.06501289  | 1.313691895 | 0.194072891 | 0.354092902 |
| 220372_at   | -0.03399551 | -1.19918318 | 0.235286064 | 0.404252067 |
| 220373_at   | -0.00055856 | -0.01567239 | 0.987549023 | 0.994032378 |
| 220374_at   | 0.125631668 | 3.535895815 | 0.000801733 | 0.004237218 |
| 220375_s_at | -0.00028198 | -0.00725129 | 0.994239002 | 0.997322973 |
| 220376_at   | -0.02858524 | -1.43742793 | 0.155918035 | 0.302482476 |
| 220377_at   | 0.020605305 | 0.522496944 | 0.603295316 | 0.754103499 |
| 220378_at   | 0.037207966 | 1.014145413 | 0.314684853 | 0.49595851  |
| 220379_at   | -0.00799172 | -0.16748254 | 0.867567362 | 0.928285546 |
| 220380_at   | -0.01965227 | -0.71932721 | 0.474799945 | 0.650713252 |
| 220381_at   | -0.0755158  | -1.46334354 | 0.148719967 | 0.292505072 |
| 220382_s_at | -0.01353938 | -0.37455009 | 0.709347902 | 0.829053491 |
| 220383_at   | -0.01344519 | -0.39879091 | 0.6914976   | 0.816712758 |
| 220384_at   | -0.02766924 | -0.59959294 | 0.551090272 | 0.713810759 |
| 220385_at   | -0.00944616 | -0.23883615 | 0.812066416 | 0.894530027 |
| 220386_s_at | -0.06660317 | -1.37928681 | 0.173050747 | 0.326616246 |
| 220387_s_at | 0.283760724 | 4.000943664 | 0.000179579 | 0.001203437 |
| 220388_at   | -0.02842118 | -1.17994935 | 0.242790986 | 0.413474631 |
| 220389_at   | 0.230556118 | 3.044829836 | 0.003485325 | 0.014598516 |
| 220390_at   | 0.409557088 | 3.243804906 | 0.001950249 | 0.00892124  |
| 220391_at   | 0.087461763 | 2.797914965 | 0.006950434 | 0.025894363 |
| 220392_at   | -0.03907763 | -1.00210331 | 0.320416191 | 0.502175635 |
| 220393_at   | -0.01880447 | -0.87931993 | 0.382821536 | 0.565513984 |
| 220394_at   | 0.020502602 | 0.689941394 | 0.492956025 | 0.66666235  |
| 220395_at   | -0.00986156 | -0.26429283 | 0.79248213  | 0.881842684 |
| 220396_at   | 0.00988385  | 0.212765043 | 0.832249073 | 0.907280602 |
| 220397_at   | 0.097430549 | 2.722311313 | 0.008526055 | 0.03065292  |
| 220398_at   | -0.00564243 | -0.12359404 | 0.902059908 | 0.947960435 |
| 220399_at   | 0.071739001 | 2.939168464 | 0.004702774 | 0.018754027 |
| 220400_at   | -0.0419557  | -1.31357644 | 0.194111519 | 0.35412001  |
| 220401_at   | 0.015755464 | 0.421266563 | 0.675102528 | 0.80478825  |
| 220402_at   | 0.026608663 | 1.164222334 | 0.249054688 | 0.421475713 |
| 220403_s_at | 0.105087344 | 3.075870212 | 0.003187959 | 0.013515108 |
| 220404_at   | -0.02868541 | -0.58475074 | 0.560961388 | 0.722429944 |
| 220405_at   | -0.45266974 | -5.23314595 | 2.35E-06    | 3.23E-05    |
| 220406_at   | -0.00253069 | -0.07839033 | 0.937784785 | 0.96750215  |
| 220407_s_at | 0.283908085 | 3.626989624 | 0.000602554 | 0.003348589 |
| 220408_x_at | 0.150809857 | 3.87665695  | 0.000270284 | 0.001700592 |
| 220409_at   | -0.02279713 | -0.89909131 | 0.372285837 | 0.555496916 |
| 220410_s_at | -0.0993695  | -2.73475267 | 0.008246063 | 0.029826241 |
| 220411_x_at | 0.188559832 | 4.739745985 | 1.41E-05    | 0.000141972 |
| 220412_x_at | -0.0152918  | -0.49662712 | 0.621311043 | 0.76744329  |
| 220413_at   | 0.034692973 | 0.890567391 | 0.376805237 | 0.559522902 |
| 220414_at   | 0.028878848 | 0.634569383 | 0.528180462 | 0.695874099 |
| 220415_at   | -0.06558707 | -1.46430173 | 0.148458904 | 0.292145892 |
| 220416_at   | -0.03997941 | -1.20479902 | 0.2331269   | 0.40180796  |
| 220417_s_at | -0.08379423 | -2.3773594  | 0.020722476 | 0.063364045 |
| 220418_at   | -0.00834808 | -0.12949266 | 0.897411539 | 0.945020226 |
| 220419_s_at | -0.49664116 | -8.21749002 | 2.47E-11    | 9.78E-09    |
| 220420_at   | 0.023204453 | 0.568693739 | 0.571738374 | 0.730102618 |
| 220421_at   | -0.08127805 | -1.29663425 | 0.199842697 | 0.36157928  |
| 220422_at   | 0.005678697 | 0.123633695 | 0.902028643 | 0.947960435 |
| 220423_at   | -0.02943362 | -0.59103707 | 0.556769834 | 0.718896293 |
| 220424_at   | 0.025357743 | 0.4261876   | 0.6715335   | 0.802185743 |
| 220425_x_at | -0.01817649 | -0.51206121 | 0.610533784 | 0.759504979 |
| 220426_at   | 0.079757524 | 2.136971537 | 0.036787806 | 0.10009867  |
| 220427_at   | -0.04237977 | -1.38380188 | 0.171670564 | 0.324684758 |
| 220428_at   | -0.01319515 | -0.31263119 | 0.755671383 | 0.859588429 |
| 220429_at   | -0.4368218  | -5.13043609 | 3.43E-06    | 4.42E-05    |
| 220430_at   | -0.05600947 | -1.10988372 | 0.271585532 | 0.44748933  |
| 220431_at   | 0.005074638 | 0.208541157 | 0.835530037 | 0.9091561   |
| 220432_s_at | 0.125077843 | 4.913140831 | 7.56E-06    | 8.47E-05    |
| 220433_at   | 0.004857809 | 0.096927474 | 0.923114927 | 0.959773231 |
| 220434_at   | 0.040979365 | 1.394464774 | 0.168444656 | 0.320371146 |
| 220435_at   | 0.053276948 | 1.300838591 | 0.198408765 | 0.359581933 |



|             |             |             |             |             |
|-------------|-------------|-------------|-------------|-------------|
| 220436_at   | 0.002035126 | 0.078855204 | 0.937416608 | 0.967424424 |
| 220437_at   | 0.020025795 | 0.501715031 | 0.617748902 | 0.765200497 |
| 220438_at   | -0.02224783 | -0.53557253 | 0.594282096 | 0.747422412 |
| 220439_at   | 0.011179158 | 0.290220612 | 0.772672605 | 0.869852744 |
| 220440_at   | -0.08315461 | -1.92158197 | 0.059528732 | 0.146098743 |
| 220441_at   | -0.01468024 | -0.35497626 | 0.723882542 | 0.838606423 |
| 220442_at   | -0.02199513 | -0.49729246 | 0.620844704 | 0.767227748 |
| 220443_s_at | 0.011014544 | 0.280800885 | 0.779852736 | 0.874141135 |
| 220444_at   | 0.017967339 | 0.386998056 | 0.70016034  | 0.822834308 |
| 220445_s_at | 0.022725703 | 0.428805809 | 0.669637706 | 0.801044033 |
| 220446_s_at | 0.038764035 | 0.998305188 | 0.322238305 | 0.504110523 |
| 220447_at   | -0.61726609 | -5.82088225 | 2.61E-07    | 5.34E-06    |
| 220448_at   | -0.04175921 | -1.22106999 | 0.226952536 | 0.394483616 |
| 220449_at   | -0.12502105 | -2.61650534 | 0.011283473 | 0.038465367 |
| 220450_at   | -0.34409479 | -6.14209655 | 7.69E-08    | 2.05E-06    |
| 220451_s_at | 0.004500471 | 0.092278245 | 0.926791901 | 0.961627554 |
| 220452_x_at | 0.143371044 | 3.566407174 | 0.000728905 | 0.003928159 |
| 220453_at   | -0.07891035 | -1.50055695 | 0.138842345 | 0.27829493  |
| 220454_s_at | 0.129413503 | 2.358787281 | 0.021691267 | 0.065772856 |
| 220455_at   | -0.08016174 | -2.45979746 | 0.016873382 | 0.053630979 |
| 220456_at   | -0.01902194 | -0.50423577 | 0.615987489 | 0.763780736 |
| 220457_at   | -0.0856681  | -1.94649771 | 0.056396978 | 0.140198784 |
| 220458_at   | 0.009408245 | 0.223026282 | 0.824291096 | 0.902391183 |
| 220459_at   | 0.028680318 | 0.713805165 | 0.478182762 | 0.653768669 |
| 220460_at   | 0.071741317 | 0.779840577 | 0.438624966 | 0.61905599  |
| 220461_at   | 0.035917548 | 0.820749093 | 0.415117472 | 0.597347867 |
| 220462_at   | -0.50482804 | -4.74564894 | 1.38E-05    | 0.000139425 |
| 220463_at   | 0.014444897 | 0.301631526 | 0.764001425 | 0.864325149 |
| 220464_at   | 0.048192224 | 1.306603158 | 0.196455267 | 0.357218812 |
| 220465_at   | -0.02952088 | -0.67087039 | 0.504940339 | 0.676767971 |
| 220466_at   | 0.106401415 | 2.421380497 | 0.018579029 | 0.058020681 |
| 220467_at   | 0.581220503 | 5.821532466 | 2.61E-07    | 5.34E-06    |
| 220468_at   | -0.01806495 | -1.10215202 | 0.274904307 | 0.451210962 |
| 220469_at   | 0.016675765 | 0.491928212 | 0.624608948 | 0.769814768 |
| 220470_at   | -0.00590363 | -0.23633027 | 0.814000991 | 0.895755849 |
| 220471_s_at | 0.012556365 | 0.358437952 | 0.721304417 | 0.837095222 |
| 220472_at   | 0.061226929 | 2.518601056 | 0.014534624 | 0.04731933  |
| 220473_s_at | -0.01723627 | -0.69531192 | 0.489609586 | 0.663884454 |
| 220474_at   | -0.00373823 | -0.19711781 | 0.844417847 | 0.914438466 |
| 220475_at   | 0.011150145 | 0.233798876 | 0.81595645  | 0.897002156 |
| 220476_s_at | -0.03683264 | -0.80157236 | 0.426040688 | 0.607394744 |
| 220477_s_at | -0.19619359 | -1.88526171 | 0.064358294 | 0.155418985 |
| 220478_at   | 0.012112703 | 0.322509138 | 0.74821553  | 0.854852071 |
| 220479_at   | 0.019411193 | 0.944694317 | 0.348696133 | 0.531747622 |
| 220480_at   | 0.023399152 | 0.498154401 | 0.620240804 | 0.766969233 |
| 220481_at   | 0.127615221 | 3.112893852 | 0.00286431  | 0.012345619 |
| 220482_s_at | -0.08042939 | -1.84304254 | 0.070385195 | 0.166375158 |
| 220483_s_at | 0.303760132 | 3.896260518 | 0.00025351  | 0.001611603 |
| 220484_at   | 0.015778234 | 0.459650485 | 0.647468878 | 0.78614893  |
| 220485_s_at | -0.03222845 | -0.60360782 | 0.548435228 | 0.711691847 |
| 220486_x_at | 0.025596545 | 0.590591441 | 0.557066448 | 0.719196167 |
| 220487_at   | 0.031071645 | 0.955056108 | 0.343474923 | 0.526388545 |
| 220488_s_at | 0.010047189 | 0.334296619 | 0.739349931 | 0.848899322 |
| 220489_s_at | -0.03612022 | -0.94382277 | 0.349137645 | 0.532275615 |
| 220490_at   | 0.005462746 | 0.13155845  | 0.895784457 | 0.94414182  |
| 220491_at   | 0.169188342 | 1.260347151 | 0.21254271  | 0.377746173 |
| 220492_s_at | -0.23659098 | -5.99663726 | 1.34E-07    | 3.17E-06    |
| 220493_at   | -0.01224776 | -0.42330607 | 0.673622443 | 0.803800241 |
| 220494_s_at | -0.13313033 | -1.5169936  | 0.134647887 | 0.272161152 |
| 220495_s_at | -0.02099318 | -0.25899264 | 0.796549065 | 0.884478393 |
| 220496_at   | -0.04153336 | -1.06798433 | 0.289910033 | 0.468104309 |
| 220497_at   | 0.00136302  | 0.041050108 | 0.967395574 | 0.98341468  |
| 220498_at   | 0.005523157 | 0.19786857  | 0.843833086 | 0.914266489 |
| 220499_at   | -0.12474553 | -2.16112593 | 0.034786382 | 0.095824099 |
| 220500_s_at | 0.028531208 | 0.350405558 | 0.727291528 | 0.840768572 |
| 220501_at   | 0.002319216 | 0.063361997 | 0.949694012 | 0.974172572 |
| 220502_s_at | -0.02168034 | -1.4659706  | 0.148005069 | 0.291458142 |
| 220503_at   | -0.0147192  | -0.90715448 | 0.368042592 | 0.55121237  |
| 220504_at   | -0.00892995 | -0.3818517  | 0.70395339  | 0.82546923  |
| 220505_at   | 0.030525961 | 0.702206159 | 0.485332146 | 0.660167527 |
| 220506_at   | -0.05020241 | -1.47915117 | 0.144458835 | 0.286405565 |
| 220507_s_at | -0.06427025 | -1.97164037 | 0.053380404 | 0.134207754 |
| 220508_at   | 0.029981382 | 0.64520962  | 0.521311041 | 0.690166269 |
| 220509_at   | -0.0204441  | -0.49406653 | 0.623107223 | 0.768536167 |
| 220510_at   | 0.057670607 | 0.908014485 | 0.367591841 | 0.550789998 |

|             |             |             |             |             |
|-------------|-------------|-------------|-------------|-------------|
| 220511_s_at | 0.005021357 | 0.125855038 | 0.900277726 | 0.946710874 |
| 220512_at   | 0.021482877 | 0.376175629 | 0.70814563  | 0.828038107 |
| 220513_at   | -0.25957771 | -4.7028718  | 1.61E-05    | 0.000159075 |
| 220514_at   | -0.05521552 | -1.13375938 | 0.261515134 | 0.435878063 |
| 220515_at   | -0.02153761 | -0.50183426 | 0.61766554  | 0.765182068 |
| 220516_at   | 0.017261562 | 0.641290485 | 0.523835768 | 0.692436207 |
| 220517_at   | 0.021355076 | 0.544013398 | 0.588497403 | 0.743158598 |
| 220518_at   | 0.214539215 | 4.762562152 | 1.30E-05    | 0.000132461 |
| 220519_s_at | -0.04851436 | -1.21500924 | 0.229238291 | 0.396959111 |
| 220520_s_at | 0.20324543  | 2.893316092 | 0.005345287 | 0.020820253 |
| 220521_s_at | -0.08802849 | -2.28995735 | 0.025643607 | 0.075205989 |
| 220522_at   | 0.271673015 | 4.315179472 | 6.22E-05    | 0.000493889 |
| 220523_at   | 0.004871175 | 0.145544812 | 0.884780508 | 0.9383907   |
| 220524_at   | -0.05724117 | -1.08438387 | 0.282638479 | 0.459969372 |
| 220525_s_at | 0.209060602 | 4.054662445 | 0.000150204 | 0.001034827 |
| 220526_s_at | 0.054322938 | 0.740532223 | 0.461935761 | 0.640110164 |
| 220527_at   | 0.031047595 | 1.431626394 | 0.157565976 | 0.304928924 |
| 220528_at   | -0.05388232 | -1.09385381 | 0.278497738 | 0.455353073 |
| 220529_at   | 0.06869145  | 1.487965699 | 0.142124793 | 0.283046265 |
| 220530_at   | 0.01086681  | 0.497542244 | 0.620669674 | 0.767149943 |
| 220531_at   | -0.01857026 | -0.51730568 | 0.606891151 | 0.756637357 |
| 220532_s_at | 0.522413866 | 4.362418494 | 5.29E-05    | 0.000432283 |
| 220533_at   | 0.083573449 | 1.47022382  | 0.146853357 | 0.289739106 |
| 220534_at   | -0.15267006 | -3.09752434 | 0.002994741 | 0.012823086 |
| 220535_at   | 0.033783981 | 1.110307126 | 0.271404603 | 0.447323149 |
| 220536_at   | -0.01630241 | -0.28738789 | 0.774829762 | 0.871065937 |
| 220537_at   | -0.0119557  | -0.29570507 | 0.768501244 | 0.867402967 |
| 220538_at   | -0.01420646 | -0.33877149 | 0.735993498 | 0.846449341 |
| 220539_at   | 0.181328455 | 2.164529618 | 0.034512161 | 0.095222712 |
| 220540_at   | -0.02518562 | -0.9907516  | 0.325882644 | 0.508070437 |
| 220541_at   | -0.01022858 | -0.22378285 | 0.823705071 | 0.902029554 |
| 220542_s_at | -0.01588353 | -0.31851413 | 0.75122809  | 0.856870139 |
| 220543_at   | 0.139309868 | 2.6451096   | 0.010467262 | 0.03618245  |
| 220544_at   | 0.051614638 | 0.938623777 | 0.351778926 | 0.535006594 |
| 220545_s_at | -0.01693957 | -0.20545718 | 0.837927422 | 0.910477901 |
| 220546_at   | 0.007812397 | 0.349632238 | 0.727868848 | 0.841174869 |
| 220547_s_at | 0.300312088 | 4.527822681 | 2.98E-05    | 0.000266723 |
| 220548_at   | 0.017960831 | 0.641917374 | 0.523431491 | 0.69216795  |
| 220549_at   | -0.01378596 | -0.79952822 | 0.427215108 | 0.608458522 |
| 220550_at   | -0.00187462 | -0.11004442 | 0.912750365 | 0.953767579 |
| 220551_at   | 0.099256547 | 1.377698013 | 0.173538434 | 0.327261896 |
| 220552_at   | 0.01735815  | 0.785885705 | 0.435102568 | 0.615741884 |
| 220553_s_at | 0.028614763 | 0.740138336 | 0.462172883 | 0.640283076 |
| 220554_at   | -0.03546171 | -0.7505482  | 0.45592956  | 0.634877829 |
| 220555_s_at | -0.13656274 | -2.68486741 | 0.009422151 | 0.03326331  |
| 220556_at   | -0.05482026 | -2.35184419 | 0.022063703 | 0.066684995 |
| 220557_s_at | -0.07742081 | -2.27305079 | 0.026707264 | 0.077621375 |
| 220558_x_at | -0.00354046 | -0.07834046 | 0.937824281 | 0.96750215  |
| 220559_at   | 0.026449619 | 1.041729439 | 0.301818429 | 0.481444053 |
| 220560_at   | -0.02114198 | -0.45506582 | 0.650744384 | 0.788359525 |
| 220561_at   | -0.06808151 | -1.49666718 | 0.139849925 | 0.279812546 |
| 220562_at   | 0.046019323 | 0.916082551 | 0.363380371 | 0.546458345 |
| 220563_s_at | 0.001406697 | 0.052840714 | 0.958038649 | 0.978599486 |
| 220564_at   | 0.013718275 | 0.51446705  | 0.608861532 | 0.758247822 |
| 220565_at   | 0.014073126 | 0.408864871 | 0.684130121 | 0.811099346 |
| 220566_at   | 0.030784892 | 0.86385175  | 0.391193518 | 0.57400172  |
| 220567_at   | 0.042839342 | 1.106293591 | 0.273123051 | 0.449095489 |
| 220568_at   | -0.02004752 | -0.68621032 | 0.495288286 | 0.668461197 |
| 220569_at   | -0.00129922 | -0.02703504 | 0.978523698 | 0.989057832 |
| 220570_at   | 0.046959549 | 1.441849481 | 0.154671112 | 0.300820807 |
| 220571_at   | -0.01973925 | -0.37913923 | 0.705955626 | 0.82671022  |
| 220572_at   | 0.104725687 | 3.27111941  | 0.001797923 | 0.008340541 |
| 220573_at   | -0.06784205 | -1.58004625 | 0.119482523 | 0.248657178 |
| 220574_at   | -0.03335833 | -0.61372731 | 0.54177207  | 0.706800869 |
| 220575_at   | 0.095965606 | 2.147279292 | 0.035921719 | 0.098262545 |
| 220576_at   | -0.07449103 | -1.18760121 | 0.239784848 | 0.409666442 |
| 220577_at   | -0.09442067 | -2.9042148  | 0.005185592 | 0.02029907  |
| 220578_at   | 0.076471221 | 1.935578342 | 0.057751729 | 0.142760951 |
| 220579_at   | 0.014562081 | 0.321480242 | 0.748991026 | 0.855213381 |
| 220580_at   | 0.015763143 | 0.337038819 | 0.737292502 | 0.847441722 |
| 220581_at   | 0.247921541 | 2.804767354 | 0.00682177  | 0.025487254 |
| 220582_at   | 0.053765119 | 1.930061134 | 0.05844673  | 0.143980887 |
| 220583_at   | 0.035605042 | 0.953344807 | 0.344333683 | 0.527163639 |
| 220584_at   | -0.22999301 | -4.31624651 | 6.20E-05    | 0.000492432 |
| 220585_at   | 0.018556872 | 0.544670103 | 0.588048471 | 0.742816233 |

|             |             |             |             |             |
|-------------|-------------|-------------|-------------|-------------|
| 220586_at   | -0.03335436 | -1.58217258 | 0.118996048 | 0.247944957 |
| 220587_s_at | -0.03777799 | -0.85035469 | 0.39859107  | 0.580932756 |
| 220588_at   | -0.09140893 | -3.19382764 | 0.00226089  | 0.010106793 |
| 220589_s_at | -0.02444943 | -0.65407503 | 0.515623688 | 0.685800067 |
| 220590_at   | 0.012461913 | 0.378854953 | 0.70616559  | 0.826778492 |
| 220591_s_at | 0.31859838  | 3.422567353 | 0.001137562 | 0.005669037 |
| 220592_at   | 0.101547832 | 1.749034729 | 0.085524122 | 0.193325784 |
| 220593_s_at | 0.168481438 | 2.836176199 | 0.006259643 | 0.023730254 |
| 220594_at   | -0.0570403  | -1.61013718 | 0.11274523  | 0.238286665 |
| 220595_at   | 0.082390004 | 2.514319052 | 0.014694478 | 0.047751443 |
| 220596_at   | 0.006358871 | 0.24544009  | 0.806973737 | 0.891358846 |
| 220597_s_at | 0.12188729  | 2.10475708  | 0.039613198 | 0.106075078 |
| 220598_at   | -0.00737841 | -0.20940999 | 0.834854914 | 0.908942665 |
| 220599_s_at | -0.00596567 | -0.11307627 | 0.910356802 | 0.952725496 |
| 220600_at   | 0.030799688 | 0.727364308 | 0.469900573 | 0.646616061 |
| 220601_at   | 0.047646518 | 1.219834331 | 0.227417195 | 0.394895428 |
| 220602_s_at | 0.064945087 | 1.175219008 | 0.24466291  | 0.415806927 |
| 220603_s_at | -0.05068587 | -1.27244531 | 0.208243666 | 0.372317714 |
| 220604_x_at | -0.18081206 | -2.86494544 | 0.005782598 | 0.022217664 |
| 220605_s_at | 0.095301465 | 1.898311152 | 0.0625862   | 0.152049491 |
| 220606_s_at | -0.05487276 | -1.2955114  | 0.200226964 | 0.362113285 |
| 220607_x_at | 0.185287205 | 3.959356343 | 0.000206049 | 0.001349858 |
| 220608_s_at | -0.02640671 | -0.88431162 | 0.38014405  | 0.562832898 |
| 220609_at   | 0.013203007 | 0.47885327  | 0.633826037 | 0.776710727 |
| 220610_s_at | 0.151534829 | 3.455515878 | 0.001028193 | 0.005217078 |
| 220611_at   | 0.022693185 | 0.493846864 | 0.623261416 | 0.76868392  |
| 220612_at   | 0.127748989 | 2.623487626 | 0.011079056 | 0.037884099 |
| 220613_s_at | -0.06821611 | -1.49009554 | 0.141565303 | 0.282284233 |
| 220614_s_at | 0.171598779 | 2.715385535 | 0.008685671 | 0.031111646 |
| 220615_s_at | -0.58754883 | -7.27170251 | 9.74E-10    | 9.20E-08    |
| 220616_at   | -0.07389522 | -2.16967918 | 0.034100882 | 0.094320869 |
| 220617_s_at | 0.326221961 | 5.562658683 | 6.91E-07    | 1.17E-05    |
| 220618_s_at | 0.079599234 | 2.652697371 | 0.010259981 | 0.035587046 |
| 220619_at   | 0.01603637  | 0.772058106 | 0.443184349 | 0.623404096 |
| 220620_at   | -0.0364072  | -0.94324079 | 0.349432667 | 0.532489252 |
| 220621_at   | 0.009385146 | 0.31023722  | 0.757481894 | 0.86057707  |
| 220622_at   | 0.003178722 | 0.088203952 | 0.930015491 | 0.963529308 |
| 220623_s_at | 0.275839722 | 3.095767795 | 0.003009997 | 0.012886559 |
| 220624_s_at | -0.02560655 | -0.53757914 | 0.592904511 | 0.746197987 |
| 220625_s_at | 0.065286193 | 1.770793605 | 0.081798823 | 0.18675622  |
| 220626_at   | -0.0268944  | -0.54913783 | 0.584998597 | 0.740459467 |
| 220627_at   | 0.025895197 | 0.574582486 | 0.567774311 | 0.727347422 |
| 220628_s_at | 0.034924091 | 0.751792074 | 0.455186814 | 0.634179472 |
| 220629_at   | 0.006525384 | 0.129766255 | 0.897196024 | 0.944848596 |
| 220630_s_at | 0.033641216 | 0.931522821 | 0.355407393 | 0.538495447 |
| 220631_at   | 0.054212989 | 1.184182308 | 0.241124669 | 0.411310828 |
| 220632_s_at | 0.063801562 | 1.685869663 | 0.097142099 | 0.212890536 |
| 220633_s_at | 0.025428529 | 0.568850447 | 0.57163271  | 0.729988545 |
| 220634_at   | 0.026893316 | 0.541733942 | 0.590056927 | 0.744244749 |
| 220635_at   | -0.09948526 | -1.76846079 | 0.082191647 | 0.187356375 |
| 220636_at   | 0.211239926 | 2.549331717 | 0.013432788 | 0.044396913 |
| 220637_at   | -0.01983002 | -0.43792442 | 0.663051998 | 0.796632074 |
| 220638_s_at | -0.0085477  | -0.19512469 | 0.845970687 | 0.915410595 |
| 220639_at   | 0.011149322 | 0.340121255 | 0.734982103 | 0.845743201 |
| 220640_at   | -0.06756271 | -1.48453081 | 0.143030776 | 0.284322496 |
| 220641_at   | -0.08996546 | -1.61128881 | 0.112493612 | 0.237867359 |
| 220642_x_at | 0.021987408 | 0.567445515 | 0.572580358 | 0.730796727 |
| 220643_s_at | 0.265375001 | 3.529143108 | 0.000818762 | 0.004312058 |
| 220644_at   | -0.01276846 | -0.31310527 | 0.755313004 | 0.859381176 |
| 220645_at   | 0.029433457 | 0.547997003 | 0.585776659 | 0.740937097 |
| 220646_s_at | -0.00823211 | -0.36345078 | 0.717576832 | 0.834649949 |
| 220647_s_at | 0.170333602 | 3.22098577  | 0.002086739 | 0.009444106 |
| 220648_at   | 0.205091765 | 3.438963577 | 0.001081826 | 0.005437357 |
| 220649_at   | -0.01124104 | -0.73936467 | 0.462638838 | 0.640557999 |
| 220650_s_at | -0.1285853  | -3.67940127 | 0.000510373 | 0.002915707 |
| 220651_s_at | -0.00017826 | -0.0053663  | 0.995736572 | 0.997950293 |
| 220652_at   | -0.07553585 | -1.85876065 | 0.068088062 | 0.162315171 |
| 220653_at   | -0.07720207 | -1.48752714 | 0.142240214 | 0.283202723 |
| 220654_at   | 0.0762508   | 2.158023661 | 0.03503798  | 0.096334507 |
| 220655_at   | 0.012556098 | 0.521001399 | 0.604330228 | 0.754771103 |
| 220656_at   | -0.00435946 | -0.31062053 | 0.757191915 | 0.860369387 |
| 220657_at   | -0.03335949 | -0.5637443  | 0.575080541 | 0.732643009 |
| 220658_s_at | 0.00794474  | 0.239054257 | 0.811898089 | 0.894495677 |
| 220659_s_at | -0.01543608 | -0.30735578 | 0.759662881 | 0.861565586 |
| 220660_at   | -0.07081759 | -1.2515253  | 0.215718741 | 0.381727192 |

|             |             |             |             |             |
|-------------|-------------|-------------|-------------|-------------|
| 220661_s_at | 0.159253965 | 3.11367215  | 0.002857848 | 0.012330482 |
| 220662_s_at | -0.02146268 | -0.56353148 | 0.575224464 | 0.732732841 |
| 220663_at   | 0.006735723 | 0.113917546 | 0.909692782 | 0.952345213 |
| 220664_at   | 0.024284008 | 0.968155589 | 0.336947913 | 0.519719625 |
| 220665_at   | -0.02277976 | -0.54182958 | 0.589991456 | 0.744244749 |
| 220666_at   | 0.002771215 | 0.09844876  | 0.921912138 | 0.95910701  |
| 220667_at   | -0.0299754  | -1.09119801 | 0.279654695 | 0.456706771 |
| 220668_s_at | 0.056587955 | 2.189218578 | 0.032579166 | 0.090939235 |
| 220669_at   | -0.01731676 | -0.84963807 | 0.39898624  | 0.581360623 |
| 220670_at   | -0.06555988 | -1.54591888 | 0.127511096 | 0.261356478 |
| 220671_at   | -0.03213857 | -0.53852533 | 0.592255452 | 0.745797236 |
| 220672_at   | -0.0359608  | -1.79825283 | 0.07729127  | 0.178710821 |
| 220673_s_at | -0.10661709 | -3.27645497 | 0.001769508 | 0.00823057  |
| 220674_at   | 0.035663718 | 1.049929526 | 0.298063768 | 0.477185138 |
| 220675_s_at | -0.00538982 | -0.15638902 | 0.876264236 | 0.933606723 |
| 220676_at   | -0.16514783 | -4.27469569 | 7.15E-05    | 0.000555371 |
| 220677_s_at | -0.1802759  | -3.38084542 | 0.001291919 | 0.006318655 |
| 220678_at   | -0.02268128 | -0.58668454 | 0.559670319 | 0.721307665 |
| 220679_s_at | -0.37330415 | -6.33136771 | 3.72E-08    | 1.17E-06    |
| 220680_at   | -0.02415242 | -0.72656711 | 0.470385259 | 0.647043951 |
| 220681_at   | 0.10081056  | 2.347131878 | 0.022319717 | 0.067273346 |
| 220682_s_at | -0.00359188 | -0.17113053 | 0.864711013 | 0.926732323 |
| 220683_at   | -0.00273708 | -0.06550653 | 0.947993802 | 0.973379399 |
| 220684_at   | -0.00636134 | -0.13948427 | 0.889546046 | 0.940850757 |
| 220685_at   | -9.65E-05   | -0.00268597 | 0.99786604  | 0.998983671 |
| 220686_s_at | -0.00953465 | -0.18361082 | 0.854952993 | 0.92068603  |
| 220687_at   | -0.01581248 | -0.4203051  | 0.67580072  | 0.805238503 |
| 220688_s_at | -0.18169585 | -4.48225772 | 3.49E-05    | 0.000305512 |
| 220689_at   | 0.008831499 | 0.142047101 | 0.887530327 | 0.939562389 |
| 220690_s_at | 0.043248228 | 0.859637712 | 0.393493942 | 0.576307759 |
| 220691_at   | 0.003052421 | 0.067023093 | 0.946791603 | 0.972579363 |
| 220692_at   | 0.074420337 | 2.258497519 | 0.027653978 | 0.079731086 |
| 220693_at   | -0.04711397 | -1.18810522 | 0.239587788 | 0.409454989 |
| 220694_at   | 0.161913016 | 3.668301449 | 0.000528693 | 0.003003475 |
| 220695_at   | -0.07251452 | -1.37924191 | 0.173064515 | 0.326616246 |
| 220696_at   | 0.0701167   | 1.627644267 | 0.108968919 | 0.232282693 |
| 220697_at   | -0.00611978 | -0.28520705 | 0.776491719 | 0.871933867 |
| 220698_at   | 0.03767616  | 0.970765354 | 0.335657395 | 0.518480637 |
| 220699_s_at | 0.00160084  | 0.0523339   | 0.95844074  | 0.978825868 |
| 220700_at   | 0.010319504 | 0.687881999 | 0.494242587 | 0.667735481 |
| 220701_at   | -0.08198029 | -1.68369602 | 0.09756389  | 0.213594854 |
| 220702_at   | 8.57E-05    | 0.00342803  | 0.997276483 | 0.998706655 |
| 220703_at   | 0.082642395 | 1.421811718 | 0.160384643 | 0.308881775 |
| 220704_at   | 0.004446716 | 0.256321092 | 0.798601148 | 0.885892313 |
| 220705_s_at | -0.01059666 | -0.14486697 | 0.885313301 | 0.938549281 |
| 220706_at   | -0.05662585 | -1.21588897 | 0.228905469 | 0.396521055 |
| 220707_s_at | -0.05612684 | -1.37390132 | 0.174708111 | 0.328870984 |
| 220708_at   | 0.017664528 | 0.364104941 | 0.717090899 | 0.834371946 |
| 220709_at   | -0.03316157 | -1.01187735 | 0.315759    | 0.497072956 |
| 220710_at   | 0.063580325 | 2.731577331 | 0.00831671  | 0.030040154 |
| 220711_at   | 0.140455298 | 2.315375647 | 0.024115137 | 0.071649627 |
| 220712_at   | 0.09275277  | 2.491672842 | 0.015566623 | 0.050144408 |
| 220713_at   | -0.02488255 | -0.63104028 | 0.530469282 | 0.697717213 |
| 220714_at   | -0.0488051  | -0.9170017  | 0.362902552 | 0.546027653 |
| 220715_at   | 0.043503791 | 1.023978027 | 0.310056674 | 0.490664519 |
| 220716_at   | 0.026713143 | 1.073809394 | 0.287312539 | 0.465503546 |
| 220717_at   | 0.03603467  | 1.740650749 | 0.086996587 | 0.195911089 |
| 220718_at   | 0.021500388 | 0.962063362 | 0.339973215 | 0.522819352 |
| 220719_at   | 0.06861344  | 2.805891367 | 0.006800876 | 0.025421941 |
| 220720_x_at | 0.350863874 | 4.879910639 | 8.52E-06    | 9.35E-05    |
| 220721_at   | -0.01057584 | -0.27097825 | 0.787360541 | 0.878663537 |
| 220722_s_at | -0.00093064 | -0.02329127 | 0.981497108 | 0.990629376 |
| 220723_s_at | -0.05750679 | -1.33860714 | 0.1858719   | 0.343590478 |
| 220724_at   | 0.017848383 | 0.912177733 | 0.365414776 | 0.548723781 |
| 220725_x_at | 0.001282474 | 0.026062142 | 0.979296374 | 0.989634064 |
| 220726_at   | 0.026716048 | 1.511580364 | 0.13601805  | 0.274146239 |
| 220727_at   | 0.173357492 | 2.792413637 | 0.007055343 | 0.02621964  |
| 220728_at   | 0.077238046 | 2.835209922 | 0.006276279 | 0.023779202 |
| 220729_at   | -0.01446283 | -0.73244714 | 0.466816954 | 0.644218066 |
| 220730_at   | -0.00336056 | -0.07952987 | 0.936882304 | 0.967298058 |
| 220731_s_at | 0.457443297 | 6.330084945 | 3.74E-08    | 1.18E-06    |
| 220732_at   | -0.06918354 | -1.62042355 | 0.110513825 | 0.234669257 |
| 220733_at   | 0.049805333 | 1.166170455 | 0.248272566 | 0.420470557 |
| 220734_s_at | 0.047388257 | 0.840327426 | 0.404142439 | 0.586388348 |
| 220735_s_at | 0.014409368 | 0.513672246 | 0.609413753 | 0.758618447 |

|             |             |             |             |             |
|-------------|-------------|-------------|-------------|-------------|
| 220736_at   | 0.037107321 | 0.784341488 | 0.436000762 | 0.616598508 |
| 220737_at   | -0.0327571  | -0.55786465 | 0.579063116 | 0.735798043 |
| 220738_s_at | 0.010034626 | 0.265988474 | 0.791182246 | 0.881078374 |
| 220739_s_at | 0.221152996 | 4.920559879 | 7.36E-06    | 8.31E-05    |
| 220740_s_at | -0.16572301 | -3.45835801 | 0.001019242 | 0.005179303 |
| 220741_s_at | -0.02419951 | -0.53484175 | 0.594784165 | 0.747813085 |
| 220742_s_at | 0.105826867 | 2.191620537 | 0.032396283 | 0.090570165 |
| 220743_at   | -0.01082893 | -0.19511213 | 0.845980478 | 0.915410595 |
| 220744_s_at | -0.18289244 | -2.93953064 | 0.004697997 | 0.018741667 |
| 220745_at   | 0.040472879 | 0.897602146 | 0.373072903 | 0.556122061 |
| 220746_s_at | 0.210959499 | 4.611942731 | 2.22E-05    | 0.000208292 |
| 220747_at   | 0.03121067  | 0.583628431 | 0.561711362 | 0.722949024 |
| 220748_s_at | -0.00609541 | -0.19139776 | 0.848875987 | 0.916996171 |
| 220749_at   | -0.00202834 | -0.04774574 | 0.962081323 | 0.980756335 |
| 220750_s_at | 0.077855615 | 2.102476037 | 0.039820238 | 0.106510083 |
| 220751_s_at | 0.224986843 | 3.257795645 | 0.001870769 | 0.008629208 |
| 220752_at   | -0.07066312 | -1.77048279 | 0.081851071 | 0.186827787 |
| 220753_s_at | 0.228888963 | 3.724877949 | 0.000441458 | 0.002576679 |
| 220754_at   | -0.02235445 | -1.14766932 | 0.255771645 | 0.429170127 |
| 220755_s_at | -0.08489802 | -1.52205381 | 0.133377    | 0.270261375 |
| 220756_s_at | 0.04647848  | 1.646897289 | 0.104935164 | 0.225805881 |
| 220757_s_at | -0.16113553 | -3.19277    | 0.002267941 | 0.010131827 |
| 220758_s_at | -0.02699909 | -0.59497764 | 0.554150369 | 0.716569882 |
| 220759_at   | 0.024478985 | 0.603765501 | 0.548331085 | 0.71161869  |
| 220760_x_at | 0.079188282 | 1.710877629 | 0.092396115 | 0.205033127 |
| 220761_s_at | 0.11342732  | 1.894690878 | 0.06307363  | 0.152992492 |
| 220762_s_at | -0.03279451 | -1.08280469 | 0.283333118 | 0.460797806 |
| 220763_at   | -0.04920416 | -0.93225166 | 0.355033856 | 0.538167818 |
| 220764_at   | 0.099683725 | 3.78534501  | 0.00036351  | 0.002183015 |
| 220765_s_at | 0.060422867 | 1.214259919 | 0.229522053 | 0.397311936 |
| 220766_at   | 0.012211069 | 0.260431617 | 0.795444343 | 0.883844627 |
| 220767_at   | -0.01887251 | -0.57317651 | 0.568719531 | 0.727869795 |
| 220768_s_at | -0.23833489 | -3.4451741  | 0.001061399 | 0.005355164 |
| 220769_s_at | 0.205047259 | 2.417379744 | 0.018765269 | 0.058505941 |
| 220770_s_at | 0.116250846 | 2.246747028 | 0.028439902 | 0.081610556 |
| 220771_at   | -0.01381037 | -0.72459012 | 0.471588461 | 0.647921286 |
| 220772_at   | -4.12E-05   | -0.0025517  | 0.997972709 | 0.999045702 |
| 220773_s_at | -0.42619486 | -6.10987936 | 8.70E-08    | 2.26E-06    |
| 220774_at   | 0.11608102  | 4.600650719 | 2.31E-05    | 0.000215029 |
| 220775_s_at | 0.028001509 | 0.761385968 | 0.449481612 | 0.628916821 |
| 220776_at   | 0.077772048 | 2.117875782 | 0.038440574 | 0.103599235 |
| 220777_at   | 0.122811376 | 2.818106927 | 0.006577574 | 0.024727871 |
| 220778_x_at | -0.20162521 | -3.66553539 | 0.000533355 | 0.003024579 |
| 220779_at   | -5.24E-05   | -0.00139267 | 0.998893544 | 0.999490986 |
| 220780_at   | 0.057432312 | 1.196672738 | 0.236255957 | 0.405450858 |
| 220781_at   | -0.02020424 | -0.60899168 | 0.544885071 | 0.709183567 |
| 220782_x_at | 0.027371927 | 0.736842448 | 0.464159749 | 0.641898305 |
| 220783_at   | 0.038110048 | 1.019684932 | 0.31207172  | 0.493090904 |
| 220784_s_at | 0.02737163  | 1.551664633 | 0.126130017 | 0.259388124 |
| 220785_at   | -0.05156176 | -1.20946615 | 0.231343488 | 0.399623258 |
| 220786_s_at | -0.00820555 | -0.40873185 | 0.684227206 | 0.811148368 |
| 220787_at   | 0.010852477 | 0.386888862 | 0.70024074  | 0.822865777 |
| 220788_s_at | -0.04522365 | -1.6759096  | 0.099087165 | 0.216082931 |
| 220789_s_at | -0.0448917  | -1.28177312 | 0.204973459 | 0.368179487 |
| 220790_s_at | 0.01318294  | 0.231853293 | 0.817460178 | 0.898006451 |
| 220791_x_at | 0.064485175 | 2.390123344 | 0.02007928  | 0.061773469 |
| 220792_at   | 0.032737359 | 0.97778616  | 0.332201858 | 0.514726302 |
| 220793_at   | -0.06274863 | -1.72590962 | 0.089636419 | 0.200411428 |
| 220794_at   | -0.22410954 | -3.60159305 | 0.000652744 | 0.003582077 |
| 220795_s_at | -0.32383401 | -6.13434105 | 7.92E-08    | 2.10E-06    |
| 220796_x_at | 0.351080218 | 5.792947716 | 2.90E-07    | 5.82E-06    |
| 220797_at   | -0.00443052 | -0.12620283 | 0.900003634 | 0.946511729 |
| 220798_x_at | -0.25632012 | -4.28998878 | 6.78E-05    | 0.000530677 |
| 220799_at   | 0.007811488 | 0.341731983 | 0.73377578  | 0.84485644  |
| 220800_s_at | -0.04003163 | -1.90128268 | 0.062188507 | 0.151330108 |
| 220801_s_at | -0.00726519 | -0.1829727  | 0.855451382 | 0.920856171 |
| 220802_at   | -0.14167227 | -3.07225542 | 0.003221327 | 0.013641041 |
| 220803_at   | -0.01914999 | -0.68463536 | 0.496274587 | 0.669407994 |
| 220804_s_at | 0.040312831 | 0.765603445 | 0.446986824 | 0.626819426 |
| 220805_at   | -0.05718766 | -1.14939935 | 0.255063643 | 0.428335938 |
| 220806_x_at | -0.0359063  | -0.8883226  | 0.37800118  | 0.560505267 |
| 220807_at   | -0.15389426 | -3.16480483 | 0.002462041 | 0.010852504 |
| 220808_at   | -0.03593491 | -0.91993979 | 0.361377904 | 0.544491312 |
| 220809_at   | 0.010016081 | 0.367680155 | 0.714437183 | 0.83247625  |
| 220810_at   | -0.00571466 | -0.34296642 | 0.732851729 | 0.84409591  |

|             |             |             |             |             |
|-------------|-------------|-------------|-------------|-------------|
| 220811_at   | 0.01616618  | 0.446824187 | 0.65665     | 0.792241498 |
| 220812_s_at | -0.02938747 | -1.43564979 | 0.156421688 | 0.303117464 |
| 220813_at   | 0.050403624 | 1.208089425 | 0.231868526 | 0.400303872 |
| 220814_at   | -0.01746797 | -0.5283364  | 0.599262282 | 0.751044024 |
| 220815_at   | -0.01914886 | -0.36855288 | 0.713789936 | 0.831982365 |
| 220816_at   | 0.044805265 | 0.950604395 | 0.345711793 | 0.528820599 |
| 220817_at   | 0.025262753 | 1.132053946 | 0.262225564 | 0.436703864 |
| 220818_s_at | -0.02825489 | -0.59906214 | 0.551441777 | 0.714059104 |
| 220819_at   | 0.036716296 | 1.401576111 | 0.166319298 | 0.317452148 |
| 220820_at   | -0.00972483 | -0.26327296 | 0.793264244 | 0.88237728  |
| 220821_at   | 0.011664305 | 0.38026984  | 0.7051208   | 0.826215657 |
| 220822_at   | 0.00688362  | 0.287472815 | 0.774765066 | 0.871045119 |
| 220823_at   | 0.008696046 | 0.255663295 | 0.799106639 | 0.886224093 |
| 220824_at   | -0.04658034 | -1.51494166 | 0.135165967 | 0.272911431 |
| 220825_s_at | -0.05589698 | -1.66966317 | 0.100323198 | 0.218086696 |
| 220826_at   | -0.03107036 | -0.62647312 | 0.533438993 | 0.700286607 |
| 220827_at   | -0.00713921 | -0.16335438 | 0.870801816 | 0.930237659 |
| 220828_s_at | 0.083620559 | 2.010903345 | 0.048946442 | 0.125373359 |
| 220829_s_at | -0.04433213 | -0.84255003 | 0.402907867 | 0.585205018 |
| 220830_at   | 0.023600341 | 0.775670501 | 0.44106457  | 0.621382507 |
| 220831_at   | -0.0619001  | -1.33729192 | 0.186298139 | 0.344052695 |
| 220832_at   | -0.01343194 | -0.30304005 | 0.762933164 | 0.863674585 |
| 220833_at   | 0.01053975  | 0.176055956 | 0.860857334 | 0.92422014  |
| 220834_at   | -0.02230286 | -0.47920453 | 0.633577644 | 0.776521379 |
| 220835_s_at | 0.001827105 | 0.077947083 | 0.938135846 | 0.967571622 |
| 220836_at   | -0.0012015  | -0.06333225 | 0.949717596 | 0.974174404 |
| 220837_at   | -0.01336831 | -0.82971271 | 0.410070474 | 0.592240091 |
| 220838_at   | 0.010025095 | 0.234516339 | 0.815402102 | 0.896591235 |
| 220839_at   | 0.001482781 | 0.031283795 | 0.975149583 | 0.987411585 |
| 220840_s_at | 0.013284597 | 0.480144982 | 0.632912823 | 0.776050186 |
| 220841_s_at | -0.00070546 | -0.02298605 | 0.981739539 | 0.990771643 |
| 220842_at   | 0.012711926 | 0.442263812 | 0.659927289 | 0.794377405 |
| 220843_s_at | 0.027127503 | 1.173527576 | 0.245334771 | 0.416683929 |
| 220844_at   | -0.02022243 | -0.87457549 | 0.385377358 | 0.567994093 |
| 220845_at   | 0.006449631 | 0.349213648 | 0.728181411 | 0.841353852 |
| 220846_s_at | 0.067457368 | 2.256797417 | 0.027766486 | 0.079978074 |
| 220847_x_at | 0.041376282 | 1.100754557 | 0.275507175 | 0.451901739 |
| 220848_x_at | -0.0071046  | -0.22752216 | 0.820810153 | 0.90043317  |
| 220849_at   | -0.02827075 | -0.80682938 | 0.423029258 | 0.604895971 |
| 220850_at   | -0.02944966 | -1.10611092 | 0.273201444 | 0.449191338 |
| 220851_at   | -0.0538329  | -0.80699346 | 0.422935472 | 0.604800566 |
| 220852_at   | -0.07571877 | -1.3446801  | 0.183913355 | 0.341098712 |
| 220853_at   | 0.081758942 | 1.488642744 | 0.14194675  | 0.282783642 |
| 220854_at   | -0.06355208 | -1.34260231 | 0.184581675 | 0.341955075 |
| 220855_at   | 0.069669592 | 2.59687699  | 0.011876654 | 0.040126354 |
| 220856_x_at | 0.193821661 | 5.407049753 | 1.24E-06    | 1.89E-05    |
| 220857_at   | 0.017092657 | 0.435631429 | 0.664705572 | 0.797953784 |
| 220858_at   | -0.23710628 | -4.8543331  | 9.34E-06    | 0.000101035 |
| 220859_at   | -0.01388762 | -0.4036743  | 0.687922391 | 0.813974411 |
| 220860_at   | -0.03661905 | -1.17287874 | 0.245592848 | 0.416959259 |
| 220861_at   | -0.02366095 | -0.85442624 | 0.396350459 | 0.578946257 |
| 220862_s_at | 0.05857893  | 1.771687592 | 0.081648698 | 0.186553889 |
| 220863_at   | -0.03501746 | -0.94625384 | 0.347907012 | 0.530942809 |
| 220864_s_at | -0.15835671 | -2.04497993 | 0.045358893 | 0.118196002 |
| 220865_s_at | -0.00988106 | -0.23325487 | 0.816376841 | 0.897353938 |
| 220866_at   | -0.02663976 | -0.7726036  | 0.442863866 | 0.623090569 |
| 220867_s_at | -0.0647293  | -1.3633967  | 0.177975803 | 0.333365238 |
| 220868_s_at | 0.045918823 | 0.597916647 | 0.552200724 | 0.714669141 |
| 220869_at   | -0.02537524 | -0.64893177 | 0.518919175 | 0.68833954  |
| 220870_at   | 0.052387421 | 1.45284439  | 0.151604121 | 0.296494459 |
| 220871_at   | -0.0309868  | -0.46532422 | 0.643424972 | 0.78339142  |
| 220872_at   | -0.01678709 | -0.58950439 | 0.557790336 | 0.719673366 |
| 220873_at   | -0.05629335 | -1.28707688 | 0.203131189 | 0.365914514 |
| 220874_at   | 0.014421234 | 0.531323779 | 0.597203901 | 0.749599414 |
| 220875_at   | 0.04042803  | 1.189319456 | 0.239113528 | 0.408863366 |
| 220876_at   | 0.044966746 | 1.913785533 | 0.060538611 | 0.148107374 |
| 220877_at   | 0.035452553 | 1.031876938 | 0.30637224  | 0.486494516 |
| 220878_at   | -0.01910896 | -0.56890825 | 0.571593735 | 0.72995963  |
| 220879_at   | -0.00691629 | -0.12795646 | 0.898621796 | 0.945837481 |
| 220880_at   | 0.003832191 | 0.138219341 | 0.890541214 | 0.941434098 |
| 220881_at   | -0.04238078 | -0.68931683 | 0.493346016 | 0.667028291 |
| 220882_at   | 0.01251769  | 0.350599618 | 0.727146679 | 0.840666357 |
| 220883_at   | -0.01991646 | -0.54703761 | 0.58643136  | 0.741452335 |
| 220884_at   | 0.00934782  | 0.500059611 | 0.618906887 | 0.766036479 |
| 220885_s_at | -0.0180281  | -0.4059454  | 0.686262113 | 0.812612309 |

|             |             |             |             |             |
|-------------|-------------|-------------|-------------|-------------|
| 220886_at   | 0.017013061 | 0.415416365 | 0.679355204 | 0.808030413 |
| 220887_at   | -0.02426938 | -0.51359447 | 0.609467805 | 0.75864347  |
| 220888_s_at | -0.0630643  | -1.6970556  | 0.094995082 | 0.209314213 |
| 220889_s_at | -0.02921273 | -0.62818549 | 0.532324547 | 0.6993509   |
| 220890_s_at | 0.118901672 | 2.55456046  | 0.013253035 | 0.043893925 |
| 220891_at   | -0.01128145 | -0.2802135  | 0.780301115 | 0.874421578 |
| 220892_s_at | -0.01032497 | -0.08770256 | 0.930412277 | 0.963750648 |
| 220893_at   | 0.022870887 | 0.839211005 | 0.404763444 | 0.587136898 |
| 220894_x_at | 0.030759525 | 0.604701471 | 0.547713118 | 0.711115074 |
| 220895_at   | 0.030897013 | 0.691776626 | 0.491811057 | 0.665819089 |
| 220896_at   | 0.001345571 | 0.049953993 | 0.960329028 | 0.979774568 |
| 220897_at   | 0.019043309 | 0.711409418 | 0.479654595 | 0.655041495 |
| 220898_at   | -0.0321246  | -1.1369225  | 0.260201097 | 0.434303385 |
| 220899_at   | -0.02234687 | -0.52789386 | 0.599567485 | 0.751257991 |
| 220900_at   | 0.026757556 | 1.544135779 | 0.127942137 | 0.262021277 |
| 220901_at   | -0.01146192 | -0.26639184 | 0.790873112 | 0.880859132 |
| 220902_at   | -0.00622795 | -0.11804529 | 0.906435705 | 0.9503466   |
| 220903_at   | -0.00693147 | -0.24522315 | 0.807140902 | 0.891437745 |
| 220904_at   | 0.018460927 | 0.348414922 | 0.728777952 | 0.841729451 |
| 220905_at   | 0.035817831 | 0.638703702 | 0.525505703 | 0.69388427  |
| 220906_at   | -0.09564915 | -3.20804802 | 0.002168066 | 0.00975488  |
| 220907_at   | -0.03093415 | -0.96946197 | 0.336301506 | 0.519116737 |
| 220908_at   | 0.17555243  | 3.513869096 | 0.000858559 | 0.004486753 |
| 220909_at   | -0.16897515 | -4.75172442 | 1.35E-05    | 0.000136871 |
| 220910_at   | -0.16054096 | -2.75402727 | 0.007828915 | 0.028567102 |
| 220911_s_at | 0.078588614 | 2.586169936 | 0.012212053 | 0.041054691 |
| 220912_at   | 0.001855021 | 0.06284309  | 0.950105443 | 0.974419345 |
| 220913_at   | -0.03364095 | -1.60185168 | 0.114568961 | 0.241179257 |
| 220914_at   | -0.09131861 | -2.84780451 | 0.006062609 | 0.023100673 |
| 220915_s_at | -0.28788072 | -5.41700466 | 1.19E-06    | 1.84E-05    |
| 220916_at   | -0.05677591 | -1.5622403  | 0.123619255 | 0.255316407 |
| 220917_s_at | 0.277375382 | 3.394967413 | 0.001237577 | 0.006095045 |
| 220918_at   | 0.047527536 | 0.988577017 | 0.326936883 | 0.509163437 |
| 220919_s_at | 0.046555018 | 1.675122281 | 0.09924227  | 0.216336724 |
| 220920_at   | 0.008860021 | 0.300598768 | 0.76478499  | 0.864850859 |
| 220921_at   | 0.018297228 | 0.550974802 | 0.583746785 | 0.739478779 |
| 220922_s_at | -0.06911279 | -1.46496524 | 0.148278337 | 0.291847237 |
| 220923_s_at | -0.05694698 | -1.07306319 | 0.28764438  | 0.465814631 |
| 220924_s_at | 0.155969103 | 1.120177229 | 0.267210945 | 0.442501715 |
| 220925_at   | 0.094617723 | 1.628623161 | 0.108760836 | 0.231960834 |
| 220926_s_at | 0.007910044 | 0.179231536 | 0.858374535 | 0.922751593 |
| 220927_s_at | 0.184815926 | 2.503348239 | 0.015111312 | 0.048924571 |
| 220928_s_at | 0.066375567 | 1.839430467 | 0.070922202 | 0.167299432 |
| 220929_at   | 0.037733304 | 0.788242351 | 0.433733937 | 0.61454006  |
| 220930_s_at | -0.00069974 | -0.01818128 | 0.985556037 | 0.99310365  |
| 220931_at   | -0.01120333 | -0.44191418 | 0.660178829 | 0.794570189 |
| 220932_at   | 0.006418083 | 0.240253341 | 0.810972842 | 0.893942341 |
| 220933_s_at | 0.15331823  | 4.382144123 | 4.94E-05    | 0.000407497 |
| 220934_s_at | -0.03581683 | -0.93351319 | 0.354387914 | 0.537540196 |
| 220935_s_at | 0.130910886 | 4.241620248 | 8.00E-05    | 0.000610706 |
| 220936_s_at | -0.16304386 | -3.87186295 | 0.000274546 | 0.001725984 |
| 220937_s_at | 0.064320141 | 2.081778504 | 0.041742293 | 0.110583673 |
| 220938_s_at | 0.059803843 | 1.669519795 | 0.100351716 | 0.218127468 |
| 220939_s_at | -0.11778373 | -1.69531095 | 0.095327359 | 0.209883424 |
| 220940_at   | -0.18458439 | -1.60499685 | 0.113873889 | 0.240025084 |
| 220941_s_at | 0.12481212  | 1.755811898 | 0.084349015 | 0.191250547 |
| 220942_x_at | -0.37585408 | -5.93021694 | 1.73E-07    | 3.86E-06    |
| 220943_s_at | -0.03023951 | -1.36970803 | 0.176006972 | 0.330591897 |
| 220944_at   | 0.035767447 | 0.714263743 | 0.477901323 | 0.653540771 |
| 220945_x_at | -0.10642352 | -2.45435159 | 0.017106269 | 0.054255437 |
| 220946_s_at | -0.01485546 | -0.4512102  | 0.653504392 | 0.790041617 |
| 220947_s_at | 0.043540445 | 1.359016384 | 0.179352103 | 0.335142543 |
| 220948_s_at | -0.63526961 | -6.58050212 | 1.42E-08    | 5.81E-07    |
| 220949_s_at | 0.124774598 | 3.443859407 | 0.001065692 | 0.005371369 |
| 220950_s_at | 0.035491075 | 0.936620612 | 0.352800064 | 0.535986309 |
| 220951_s_at | -0.06764389 | -1.1353165  | 0.260867682 | 0.4351722   |
| 220952_s_at | 0.005389973 | 0.063742666 | 0.949392196 | 0.974041827 |
| 220953_s_at | -0.04915687 | -1.31517815 | 0.193576161 | 0.353547677 |
| 220954_s_at | 0.039046296 | 0.630273993 | 0.530966945 | 0.698121923 |
| 220955_x_at | 0.089173363 | 2.507661336 | 0.014946179 | 0.048446086 |
| 220956_s_at | -0.05600515 | -1.33769156 | 0.186168545 | 0.343925456 |
| 220957_at   | 0.025153163 | 0.740134562 | 0.462175155 | 0.640283076 |
| 220958_at   | 0.057529839 | 1.397568643 | 0.167514448 | 0.319092818 |
| 220959_s_at | 0.030718877 | 1.03053303  | 0.306996994 | 0.48717559  |
| 220960_x_at | 0.007470577 | 0.191040967 | 0.849154234 | 0.917208069 |

|             |             |             |             |             |
|-------------|-------------|-------------|-------------|-------------|
| 220961_s_at | -0.00620647 | -0.18049146 | 0.857389875 | 0.922181082 |
| 220962_s_at | -0.03432396 | -0.85428673 | 0.396427101 | 0.578985708 |
| 220963_s_at | 0.003512585 | 0.079726095 | 0.936726906 | 0.967186703 |
| 220964_s_at | 0.04838584  | 1.728205871 | 0.089220909 | 0.199682551 |
| 220965_s_at | 0.020940979 | 0.42672865  | 0.67114156  | 0.80192918  |
| 220966_x_at | -0.41686805 | -6.40788677 | 2.77E-08    | 9.36E-07    |
| 220967_s_at | 0.126512842 | 4.14743278  | 0.000110049 | 0.000798299 |
| 220968_s_at | 0.064608271 | 1.677599562 | 0.098754911 | 0.215516113 |
| 220969_s_at | 0.094317523 | 2.668444101 | 0.009841726 | 0.03445452  |
| 220970_s_at | -0.04492908 | -1.14908839 | 0.255190798 | 0.428452877 |
| 220971_at   | 0.011366468 | 0.289115185 | 0.773514191 | 0.870302912 |
| 220972_s_at | -0.02934676 | -1.1150373  | 0.269389086 | 0.445068094 |
| 220973_s_at | 0.020342411 | 0.405801103 | 0.686367552 | 0.812694095 |
| 220974_x_at | -0.00231832 | -0.0610309  | 0.951542394 | 0.975128584 |
| 220975_s_at | 0.194436853 | 4.073802088 | 0.000140905 | 0.000983189 |
| 220976_s_at | -0.05366925 | -1.11450934 | 0.269613527 | 0.445257842 |
| 220977_x_at | 2.83E-05    | 0.00056927  | 0.999547723 | 0.999775923 |
| 220978_at   | -0.02090735 | -0.63407161 | 0.528502984 | 0.696055165 |
| 220979_s_at | -0.64436167 | -5.39581525 | 1.29E-06    | 1.96E-05    |
| 220980_s_at | 0.085288394 | 2.318694644 | 0.023921656 | 0.071207317 |
| 220981_x_at | 0.036563586 | 1.00765443  | 0.31776554  | 0.499018852 |
| 220982_s_at | 0.002102394 | 0.070966162 | 0.943666466 | 0.970855038 |
| 220983_s_at | 0.056952885 | 1.856008865 | 0.068485596 | 0.163040444 |
| 220984_s_at | -0.08962365 | -1.82130768 | 0.073668795 | 0.172251009 |
| 220985_s_at | -0.04369869 | -0.78159354 | 0.437601818 | 0.618074649 |
| 220986_s_at | -0.00332567 | -0.16864701 | 0.8666554   | 0.927869789 |
| 220987_s_at | 0.162892155 | 3.388089195 | 0.001263768 | 0.006197777 |
| 220988_s_at | 0.143535637 | 4.164166008 | 0.000104009 | 0.000762117 |
| 220989_s_at | -0.02590367 | -0.57669609 | 0.566354816 | 0.726591153 |
| 220990_s_at | -0.20910153 | -1.89543943 | 0.062972582 | 0.152780557 |
| 220991_s_at | 0.024373279 | 1.009531704 | 0.316872489 | 0.498106478 |
| 220992_s_at | -0.00467375 | -0.13496752 | 0.893100348 | 0.942868229 |
| 220993_s_at | -0.24990828 | -5.52060244 | 8.09E-07    | 1.35E-05    |
| 220994_s_at | -0.12975438 | -2.33375912 | 0.023060726 | 0.069109499 |
| 220995_at   | 0.037649207 | 0.879237838 | 0.382865668 | 0.565541791 |
| 220996_s_at | -0.03048264 | -1.100911   | 0.275439639 | 0.451851384 |
| 220997_s_at | -0.05097343 | -1.17864389 | 0.243306557 | 0.414116687 |
| 220998_s_at | -0.01216019 | -0.20523183 | 0.838102664 | 0.910559246 |
| 220999_s_at | -0.61694496 | -6.08412084 | 9.60E-08    | 2.45E-06    |
| 221000_s_at | -0.01111343 | -0.37731048 | 0.707306715 | 0.827620152 |
| 221001_at   | -0.00326987 | -0.08759527 | 0.930497186 | 0.96375731  |
| 221002_s_at | 0.187629132 | 5.330159327 | 1.64E-06    | 2.42E-05    |
| 221003_s_at | 0.173899564 | 2.802435758 | 0.006865301 | 0.025630608 |
| 221004_s_at | 0.189509227 | 3.252136677 | 0.001902542 | 0.008746879 |
| 221005_s_at | 0.168917823 | 3.812969193 | 0.000332464 | 0.002029567 |
| 221006_s_at | -0.18477269 | -2.97571584 | 0.004242823 | 0.017222549 |
| 221007_s_at | 0.056909142 | 1.713309391 | 0.091944984 | 0.204265308 |
| 221008_s_at | 0.15822996  | 1.186453514 | 0.240234013 | 0.410198613 |
| 221009_s_at | 0.300235845 | 2.231188501 | 0.029510857 | 0.08400097  |
| 221010_s_at | -0.07517864 | -2.13835236 | 0.036670738 | 0.09985308  |
| 221011_s_at | 0.055322734 | 1.019272986 | 0.312265539 | 0.493232331 |
| 221012_s_at | 0.17438533  | 2.93657332  | 0.004737134 | 0.018867482 |
| 221013_s_at | 0.011792357 | 0.162203037 | 0.871704298 | 0.930774862 |
| 221014_s_at | 0.098085473 | 2.660746592 | 0.010044196 | 0.035026156 |
| 221015_s_at | 0.13694715  | 3.720060507 | 0.000448313 | 0.002611235 |
| 221016_s_at | 0.193235768 | 3.830084667 | 0.000314522 | 0.001937239 |
| 221017_s_at | -0.05402908 | -1.31461983 | 0.193762649 | 0.353757928 |
| 221018_s_at | -0.03966794 | -1.19262724 | 0.237825006 | 0.407265223 |
| 221019_s_at | 0.345690144 | 3.58133532  | 0.000695612 | 0.003776334 |
| 221020_s_at | -0.34944525 | -3.4581232  | 0.001019979 | 0.005182457 |
| 221021_s_at | 0.06026786  | 1.644300019 | 0.105472127 | 0.226677581 |
| 221022_s_at | 0.046703936 | 0.983283839 | 0.329512497 | 0.511976089 |
| 221023_s_at | 0.061977994 | 1.468244465 | 0.14738846  | 0.290563964 |
| 221024_s_at | 0.279029864 | 4.10429267  | 0.000127229 | 0.000904421 |
| 221025_x_at | 0.004621184 | 0.121535464 | 0.903682969 | 0.94895205  |
| 221026_s_at | -0.17377653 | -3.95929605 | 0.00020609  | 0.001349929 |
| 221027_s_at | -0.0362628  | -1.22221711 | 0.226521795 | 0.394036414 |
| 221028_s_at | -0.07933947 | -2.16770256 | 0.034258237 | 0.094665078 |
| 221029_s_at | -0.15758884 | -3.6033184  | 0.000649212 | 0.003566196 |
| 221030_s_at | 0.009511858 | 0.20499592  | 0.838286122 | 0.910685319 |
| 221031_s_at | 0.378794631 | 2.104802062 | 0.039609125 | 0.106070526 |
| 221032_s_at | 0.267643179 | 5.180985133 | 2.85E-06    | 3.79E-05    |
| 221033_s_at | 0.012323388 | 0.428255389 | 0.670036075 | 0.801341858 |
| 221034_s_at | 0.024907916 | 0.632004322 | 0.529843535 | 0.69718143  |
| 221035_s_at | 0.115392165 | 3.191670948 | 0.002275289 | 0.010157123 |



|             |             |             |             |             |
|-------------|-------------|-------------|-------------|-------------|
| 221036_s_at | -0.02404884 | -0.62594306 | 0.533784215 | 0.700489903 |
| 221037_s_at | -0.02255524 | -1.40417344 | 0.165548214 | 0.316318118 |
| 221038_at   | 0.000519194 | 0.017771874 | 0.985881249 | 0.993167574 |
| 221039_s_at | -0.05550952 | -1.01792893 | 0.312898477 | 0.493909467 |
| 221040_at   | 0.011692216 | 0.562888611 | 0.575659314 | 0.733076455 |
| 221041_s_at | -0.08118511 | -2.06084415 | 0.043767776 | 0.114926457 |
| 221042_s_at | 0.369288254 | 4.672557236 | 1.79E-05    | 0.000173561 |
| 221043_at   | -0.00540132 | -0.16356697 | 0.870635195 | 0.930159402 |
| 221044_s_at | 0.079537527 | 1.875288535 | 0.065741115 | 0.157967937 |
| 221045_s_at | 0.216873574 | 3.115345181 | 0.002844005 | 0.012284167 |
| 221046_s_at | 0.153199693 | 2.904934919 | 0.005175198 | 0.020273245 |
| 221047_s_at | -0.11943025 | -3.49319082 | 0.000915375 | 0.00473714  |
| 221048_x_at | -0.03178375 | -1.09115579 | 0.279673116 | 0.456706771 |
| 221049_s_at | 0.009321721 | 0.276553101 | 0.783096938 | 0.876043041 |
| 221050_s_at | 0.01654405  | 0.339331718 | 0.735573657 | 0.846240522 |
| 221051_s_at | -0.02044538 | -0.52586257 | 0.600969307 | 0.752398431 |
| 221052_at   | -0.02578865 | -0.54361887 | 0.588767189 | 0.743298133 |
| 221053_s_at | -0.04201837 | -0.92934725 | 0.356523902 | 0.539675361 |
| 221054_s_at | 0.023217292 | 1.080070259 | 0.28453873  | 0.462069752 |
| 221056_x_at | 0.020092223 | 0.553960524 | 0.58171489  | 0.737762192 |
| 221057_at   | -0.00055129 | -0.02602432 | 0.979326409 | 0.989634064 |
| 221058_s_at | 0.104627736 | 2.617445357 | 0.011255754 | 0.038385513 |
| 221059_s_at | 0.647950045 | 4.876141342 | 8.64E-06    | 9.45E-05    |
| 221060_s_at | -0.03207135 | -0.47711277 | 0.635057442 | 0.777446183 |
| 221061_at   | 0.03200615  | 1.185124273 | 0.240754987 | 0.410837032 |
| 221062_at   | 0.009602474 | 0.477190013 | 0.635002768 | 0.777446183 |
| 221063_x_at | -0.16138209 | -4.55018289 | 2.75E-05    | 0.000249678 |
| 221064_s_at | 0.069001887 | 2.119588485 | 0.038289738 | 0.103286153 |
| 221065_s_at | -0.040267   | -0.69695109 | 0.488590701 | 0.663005788 |
| 221066_at   | -0.05484413 | -1.60444821 | 0.113994891 | 0.240200832 |
| 221067_s_at | 0.063424035 | 1.219440137 | 0.227565574 | 0.395048784 |
| 221068_at   | 0.034815607 | 0.570191005 | 0.570729197 | 0.729195477 |
| 221069_s_at | -0.05775344 | -1.81669114 | 0.074382542 | 0.173539736 |
| 221070_s_at | 0.023338401 | 0.916357827 | 0.363237228 | 0.546349361 |
| 221071_at   | 0.21654613  | 3.367124117 | 0.001346876 | 0.006543599 |
| 221072_at   | -0.0305263  | -0.64304323 | 0.522705849 | 0.691515298 |
| 221073_s_at | 0.015465073 | 0.410408624 | 0.683003814 | 0.810511296 |
| 221074_at   | 0.103815915 | 2.86794978  | 0.005734769 | 0.022069947 |
| 221075_s_at | -0.01902205 | -0.4575617  | 0.648960347 | 0.787080575 |
| 221076_at   | 0.008413166 | 0.462424939 | 0.645490066 | 0.784943459 |
| 221077_at   | 0.007681576 | 0.221357457 | 0.825584095 | 0.903209331 |
| 221078_s_at | 0.098653397 | 1.264382215 | 0.211101613 | 0.376013442 |
| 221079_s_at | -0.00323542 | -0.13447005 | 0.893491952 | 0.942985632 |
| 221080_s_at | -0.07762613 | -1.26836882 | 0.209684953 | 0.374235488 |
| 221081_s_at | 0.054180236 | 0.937394581 | 0.352405296 | 0.535631121 |
| 221082_s_at | -0.52201455 | -5.52474191 | 7.97E-07    | 1.33E-05    |
| 221083_at   | -0.02160502 | -0.47648567 | 0.635501368 | 0.777770001 |
| 221084_at   | -0.00785288 | -0.13601241 | 0.89227791  | 0.942356131 |
| 221085_at   | 0.014694202 | 0.515577272 | 0.608090545 | 0.757641914 |
| 221086_s_at | 0.037266053 | 1.036550093 | 0.304206523 | 0.484087517 |
| 221087_s_at | 0.125940068 | 2.595294948 | 0.011925678 | 0.040270676 |
| 221088_s_at | -0.27447176 | -2.46705451 | 0.016567479 | 0.052793853 |
| 221089_at   | 0.025063097 | 0.844231207 | 0.401975579 | 0.58428348  |
| 221090_s_at | -0.01266701 | -0.31255508 | 0.755728921 | 0.859588429 |
| 221091_at   | -0.00829002 | -0.23604923 | 0.814218032 | 0.895884393 |
| 221092_at   | 0.036376615 | 0.859224641 | 0.393719888 | 0.576393122 |
| 221093_at   | -0.04430471 | -1.14880678 | 0.255305991 | 0.428565781 |
| 221094_s_at | -0.06340799 | -1.72626141 | 0.089572658 | 0.200299272 |
| 221095_s_at | -0.00989983 | -0.25964319 | 0.796049576 | 0.884165407 |
| 221096_s_at | 0.159468805 | 4.354745351 | 5.43E-05    | 0.000441601 |
| 221097_s_at | -0.0211793  | -0.4036947  | 0.687907468 | 0.813974411 |
| 221098_x_at | 0.000775309 | 0.046572455 | 0.963012432 | 0.98113172  |
| 221099_at   | -0.05069294 | -1.06023129 | 0.293392326 | 0.471953707 |
| 221100_at   | -0.02349758 | -0.48404291 | 0.630160551 | 0.774049201 |
| 221101_at   | -0.00277301 | -0.0917855  | 0.927181698 | 0.961875684 |
| 221102_s_at | -0.05734171 | -1.22930725 | 0.223872722 | 0.391046655 |
| 221103_s_at | 0.223700256 | 3.281055113 | 0.00174535  | 0.0081372   |
| 221104_s_at | -0.24778375 | -4.86900071 | 8.86E-06    | 9.65E-05    |
| 221105_at   | 0.066144522 | 1.952812792 | 0.055625929 | 0.138714094 |
| 221106_at   | -0.0359983  | -0.87157125 | 0.387001258 | 0.569654838 |
| 221107_at   | -0.0070333  | -0.19745436 | 0.844155695 | 0.914372314 |
| 221108_at   | 0.062479132 | 1.650916654 | 0.104108585 | 0.224491984 |
| 221109_at   | 0.027301165 | 0.682296752 | 0.497741103 | 0.670799269 |
| 221110_x_at | 0.016045838 | 0.346503843 | 0.730205954 | 0.84270245  |
| 221111_at   | -0.020569   | -1.24747273 | 0.217189438 | 0.383391095 |

|             |             |             |             |             |
|-------------|-------------|-------------|-------------|-------------|
| 221112_at   | -0.01017432 | -0.18790821 | 0.851598149 | 0.918571751 |
| 221113_s_at | 0.087801707 | 2.087232187 | 0.041228181 | 0.109498362 |
| 221114_at   | -0.34371696 | -5.7076519  | 4.01E-07    | 7.58E-06    |
| 221115_s_at | -0.00733189 | -0.18779379 | 0.851687443 | 0.918571751 |
| 221116_at   | 0.116042448 | 3.802255929 | 0.00034419  | 0.00208718  |
| 221117_at   | -0.02881029 | -0.94742988 | 0.347312707 | 0.530330431 |
| 221118_at   | -0.0109607  | -0.39173083 | 0.696678873 | 0.820495235 |
| 221119_at   | -0.0075852  | -0.14799225 | 0.882857237 | 0.937346311 |
| 221120_at   | 0.030590799 | 0.832174484 | 0.408690935 | 0.590877823 |
| 221121_at   | 0.010662871 | 0.27245684  | 0.786229087 | 0.878150451 |
| 221122_at   | 0.003313388 | 0.090125708 | 0.928494843 | 0.962658266 |
| 221123_x_at | 0.39660495  | 6.138207447 | 7.80E-08    | 2.08E-06    |
| 221124_s_at | 0.017261489 | 0.401837084 | 0.689266611 | 0.814917684 |
| 221125_s_at | 0.057884491 | 1.298432957 | 0.199228282 | 0.360730478 |
| 221126_at   | 0.00590969  | 0.191853478 | 0.848520622 | 0.916789567 |
| 221127_s_at | -0.29435452 | -4.63345243 | 2.05E-05    | 0.000195534 |
| 221128_at   | 0.023511565 | 0.690866981 | 0.492378386 | 0.666269317 |
| 221129_at   | 0.00795573  | 0.177687052 | 0.859581899 | 0.923494176 |
| 221130_s_at | -0.01908567 | -0.47511175 | 0.636474441 | 0.778432321 |
| 221131_at   | 0.084331337 | 2.722040058 | 0.008532256 | 0.030670278 |
| 221132_at   | 0.04099906  | 1.046549277 | 0.299607624 | 0.478883586 |
| 221133_s_at | 0.025432891 | 0.608493958 | 0.545212781 | 0.709373364 |
| 221134_at   | 0.041460403 | 1.048572546 | 0.298682884 | 0.477884059 |
| 221135_s_at | 0.13633166  | 2.512927227 | 0.014746778 | 0.047893539 |
| 221136_at   | -0.00069141 | -0.01360415 | 0.98919203  | 0.9949255   |
| 221137_at   | 0.07068787  | 2.137229842 | 0.036765882 | 0.100066462 |
| 221138_s_at | -0.01135875 | -0.49078192 | 0.625414641 | 0.770467807 |
| 221139_s_at | 0.094497368 | 2.060835552 | 0.043768625 | 0.114926457 |
| 221140_s_at | 0.027802832 | 0.794019862 | 0.430389449 | 0.611262869 |
| 221141_x_at | -0.09378779 | -1.77172351 | 0.081642672 | 0.186553889 |
| 221142_s_at | 0.010382765 | 0.277467419 | 0.782398309 | 0.87563409  |
| 221143_at   | -0.09534764 | -2.68822404 | 0.009338437 | 0.033023694 |
| 221144_at   | -0.03522092 | -0.95648485 | 0.342759034 | 0.52569335  |
| 221145_at   | 0.003344635 | 0.133359255 | 0.894366449 | 0.943580778 |
| 221146_at   | -0.04768222 | -1.05525202 | 0.295643902 | 0.474601913 |
| 221147_x_at | 0.066638546 | 1.334199932 | 0.187303111 | 0.345254762 |
| 221148_at   | 0.027178593 | 0.594023506 | 0.554784054 | 0.717098825 |
| 221149_at   | -0.03680764 | -1.03828059 | 0.303407196 | 0.483228481 |
| 221150_at   | 0.026303477 | 0.497701999 | 0.620557738 | 0.767135714 |
| 221151_at   | 0.050519997 | 2.231510392 | 0.029488345 | 0.08395293  |
| 221152_at   | -0.03387405 | -1.21707798 | 0.228456204 | 0.395973033 |
| 221153_s_at | -0.02469885 | -1.37736217 | 0.173641656 | 0.327387483 |
| 221154_at   | -0.03497713 | -1.30962419 | 0.195437287 | 0.355884906 |
| 221155_x_at | 0.142095447 | 2.607543505 | 0.011550876 | 0.039245229 |
| 221156_x_at | -0.04421514 | -1.4268776  | 0.158924935 | 0.306810936 |
| 221157_s_at | -0.01626914 | -0.3413726  | 0.734044876 | 0.845143457 |
| 221158_at   | 0.054380201 | 1.66094503  | 0.102069375 | 0.221117935 |
| 221159_at   | 0.094854025 | 1.424991363 | 0.159467234 | 0.307605405 |
| 221160_s_at | -0.00544333 | -0.13602435 | 0.892268509 | 0.942356131 |
| 221161_at   | 0.034105022 | 0.620217361 | 0.537520627 | 0.703531761 |
| 221162_at   | -0.0302614  | -0.62053313 | 0.537314216 | 0.703346229 |
| 221163_s_at | -0.08764578 | -1.35508637 | 0.180593815 | 0.336843152 |
| 221164_x_at | -0.02418181 | -0.68656542 | 0.495066054 | 0.668356196 |
| 221165_s_at | -0.0023133  | -0.06558158 | 0.947934311 | 0.973379399 |
| 221166_at   | 0.011279697 | 0.37881323  | 0.706196408 | 0.826778492 |
| 221167_s_at | -0.04687547 | -0.99542014 | 0.323627009 | 0.50566508  |
| 221168_at   | -0.02310612 | -0.800504   | 0.426654253 | 0.607881659 |
| 221169_s_at | -0.02698067 | -0.64582404 | 0.520915814 | 0.689821018 |
| 221170_at   | -0.02827286 | -1.24741228 | 0.217211429 | 0.383397045 |
| 221171_at   | 0.083857028 | 1.618229892 | 0.110986665 | 0.235483101 |
| 221172_at   | -0.01265101 | -0.24146283 | 0.810039842 | 0.893352366 |
| 221173_at   | 0.248796961 | 4.54298835  | 2.82E-05    | 0.00025466  |
| 221174_at   | 0.018633756 | 0.676952195 | 0.501101475 | 0.673500154 |
| 221175_at   | -0.02879086 | -0.55492079 | 0.581062117 | 0.737168231 |
| 221176_x_at | 0.078485097 | 1.451237817 | 0.152049282 | 0.297092505 |
| 221177_at   | -0.03046455 | -0.95705639 | 0.342472928 | 0.525453336 |
| 221178_at   | -0.06159714 | -1.69972935 | 0.0944877   | 0.20853552  |
| 221179_at   | -0.03147556 | -0.54324606 | 0.58902217  | 0.74354156  |
| 221180_at   | -0.01569308 | -0.29260909 | 0.770855144 | 0.86883532  |
| 221181_at   | -0.02280005 | -0.57149228 | 0.569852831 | 0.728569137 |
| 221182_at   | 0.001188989 | 0.063415761 | 0.949651384 | 0.974172572 |
| 221183_at   | 0.011529835 | 0.262011032 | 0.794232292 | 0.882914947 |
| 221184_at   | 0.089514872 | 1.747783041 | 0.085742633 | 0.193711949 |
| 221185_s_at | 0.310096286 | 1.982029383 | 0.052174906 | 0.131881731 |
| 221186_at   | -0.00195091 | -0.0469268  | 0.962731225 | 0.980994217 |

|             |             |             |             |             |
|-------------|-------------|-------------|-------------|-------------|
| 221187_s_at | 0.04848075  | 0.919215802 | 0.361753219 | 0.544998832 |
| 221188_s_at | 0.113352618 | 2.002669099 | 0.049849124 | 0.127175308 |
| 221189_s_at | 0.012987633 | 0.380574359 | 0.70489601  | 0.826123612 |
| 221190_s_at | 0.129703067 | 3.006621237 | 0.003886901 | 0.01601488  |
| 221191_at   | 0.210857407 | 3.643967522 | 0.000571079 | 0.003205561 |
| 221192_x_at | 0.166802726 | 4.071572178 | 0.000141959 | 0.000989463 |
| 221193_s_at | 0.096098366 | 1.871238487 | 0.0663098   | 0.159063795 |
| 221194_s_at | -0.0692635  | -2.05738854 | 0.044110181 | 0.115616222 |
| 221195_at   | -0.05932124 | -2.87943209 | 0.005555323 | 0.021492252 |
| 221196_x_at | -0.11867465 | -2.53709599 | 0.013862093 | 0.045536543 |
| 221197_s_at | -0.0028772  | -0.0785399  | 0.937666327 | 0.967475089 |
| 221198_at   | -0.0176074  | -0.24711303 | 0.805684961 | 0.890595639 |
| 221199_at   | -0.03998344 | -0.82519103 | 0.41261173  | 0.594948974 |
| 221200_at   | 0.002249738 | 0.077308246 | 0.93864184  | 0.96796763  |
| 221201_s_at | -0.02596909 | -0.79672013 | 0.428831596 | 0.609933859 |
| 221202_at   | 0.002910133 | 0.100070818 | 0.920629875 | 0.958253247 |
| 221203_s_at | -0.12698229 | -2.41991441 | 0.018647084 | 0.058188485 |
| 221204_s_at | 0.003628521 | 0.079261802 | 0.937094597 | 0.96732401  |
| 221205_at   | -0.06230405 | -1.49079485 | 0.141381978 | 0.281991511 |
| 221206_at   | -0.14518809 | -3.0416843  | 0.003516863 | 0.014687939 |
| 221207_s_at | -1.06736387 | -6.87062689 | 4.63E-09    | 2.62E-07    |
| 221208_s_at | 0.197631374 | 3.578390434 | 0.000702063 | 0.003804145 |
| 221209_s_at | -0.05906368 | -1.4097204  | 0.1639107   | 0.313981269 |
| 221210_s_at | 0.553990122 | 3.89809332  | 0.000251994 | 0.001604287 |
| 221211_s_at | 0.043507613 | 1.93087755  | 0.058343439 | 0.143773985 |
| 221212_x_at | 0.01735435  | 0.669706383 | 0.505676873 | 0.677327544 |
| 221213_s_at | 0.173166773 | 2.719202822 | 0.00859736  | 0.030869543 |
| 221214_s_at | 0.038624804 | 0.680339137 | 0.498970517 | 0.671848347 |
| 221215_s_at | -0.0041262  | -0.10038518 | 0.920381395 | 0.958246408 |
| 221216_s_at | -0.05973562 | -1.88350334 | 0.064600296 | 0.15584974  |
| 221217_s_at | -1.37700525 | -7.233576   | 1.13E-09    | 1.02E-07    |
| 221218_s_at | 0.043721836 | 1.286954399 | 0.203173593 | 0.365976148 |
| 221219_s_at | -0.0443261  | -1.08488267 | 0.282419313 | 0.459696396 |
| 221220_s_at | -0.09507078 | -1.81107422 | 0.075258762 | 0.175089254 |
| 221221_s_at | -0.09190116 | -1.757101   | 0.084127019 | 0.190853031 |
| 221222_s_at | 0.006993567 | 0.179260324 | 0.858352035 | 0.9227496   |
| 221223_x_at | 0.031148278 | 0.771785237 | 0.443344713 | 0.623590416 |
| 221224_s_at | 0.050010145 | 1.082158739 | 0.283617598 | 0.461088816 |
| 221225_at   | 0.070579611 | 2.607898062 | 0.011540188 | 0.039214878 |
| 221226_s_at | -0.00022089 | -0.00378956 | 0.996989254 | 0.998620403 |
| 221227_x_at | -0.21769845 | -4.96042591 | 6.37E-06    | 7.36E-05    |
| 221228_s_at | -0.01037999 | -0.32043814 | 0.749776741 | 0.855819053 |
| 221229_s_at | -0.12813007 | -2.14729561 | 0.035920362 | 0.098262545 |
| 221230_s_at | 0.282565595 | 3.869111454 | 0.000277021 | 0.001738853 |
| 221231_s_at | -0.00702709 | -0.26559454 | 0.791484187 | 0.881231141 |
| 221232_s_at | -0.10536888 | -2.04404006 | 0.045454707 | 0.118402363 |
| 221233_s_at | -0.01643224 | -0.58885754 | 0.558221309 | 0.720000771 |
| 221234_s_at | 0.002579199 | 0.043165364 | 0.965716547 | 0.982512382 |
| 221235_s_at | 0.092340714 | 2.784972896 | 0.007199558 | 0.026651423 |
| 221236_s_at | -0.07589309 | -0.53691657 | 0.593359212 | 0.746618895 |
| 221237_s_at | -0.1391424  | -3.06886943 | 0.003252879 | 0.013756401 |
| 221238_at   | 0.113954066 | 2.915379558 | 0.005026592 | 0.0198042   |
| 221239_s_at | -0.03053118 | -0.5895824  | 0.557738375 | 0.719647876 |
| 221240_s_at | -0.12753877 | -2.68582138 | 0.009398289 | 0.033201197 |
| 221241_s_at | -0.03631505 | -0.94849002 | 0.346777541 | 0.529816144 |
| 221242_at   | -0.10350557 | -2.15919128 | 0.034943099 | 0.09612686  |
| 221243_s_at | 0.004123005 | 0.171424131 | 0.864481208 | 0.92653131  |
| 221244_s_at | -0.08257271 | -2.21691335 | 0.030524609 | 0.08628753  |
| 221245_s_at | 0.377447638 | 6.802432269 | 6.03E-09    | 3.15E-07    |
| 221246_x_at | 0.365854187 | 6.469126015 | 2.19E-08    | 7.89E-07    |
| 221247_s_at | 0.13193173  | 3.98983859  | 0.000186307 | 0.0012409   |
| 221248_s_at | -0.00767293 | -0.20286534 | 0.839943424 | 0.911842421 |
| 221249_s_at | -0.27539808 | -5.17233117 | 2.94E-06    | 3.89E-05    |
| 221250_s_at | -0.03707891 | -0.79005349 | 0.432683849 | 0.613557972 |
| 221251_x_at | -0.13556788 | -3.8439094  | 0.000300712 | 0.001867104 |
| 221252_s_at | -0.01392392 | -0.42640021 | 0.671379474 | 0.802080463 |
| 221253_s_at | 0.2043337   | 3.415782899 | 0.001161412 | 0.005770882 |
| 221254_s_at | -0.06177037 | -1.60868769 | 0.113062576 | 0.238697749 |
| 221255_s_at | -0.01709674 | -0.44953252 | 0.65470687  | 0.790793747 |
| 221256_s_at | -0.08525379 | -1.78123024 | 0.080060471 | 0.183820323 |
| 221257_x_at | 0.089646978 | 1.34782946  | 0.182903872 | 0.339762245 |
| 221258_s_at | 0.02769486  | 1.664675179 | 0.10131924  | 0.219824238 |
| 221259_s_at | -0.11836051 | -2.04477656 | 0.04537961  | 0.118227825 |
| 221260_s_at | -0.25012913 | -3.73573189 | 0.000426378 | 0.002501262 |
| 221261_x_at | -0.17286036 | -2.60201801 | 0.011718607 | 0.039684625 |

|             |             |             |             |             |
|-------------|-------------|-------------|-------------|-------------|
| 221262_s_at | -0.10324442 | -2.92640282 | 0.004874053 | 0.019319838 |
| 221263_s_at | -0.02749779 | -0.46534975 | 0.643406801 | 0.783390638 |
| 221264_s_at | 0.019530429 | 0.365399945 | 0.71612927  | 0.833752295 |
| 221265_s_at | 0.070605097 | 2.30004172  | 0.025027207 | 0.073782114 |
| 221266_s_at | -0.03359415 | -0.74263613 | 0.460670383 | 0.639050215 |
| 221267_s_at | -0.21304974 | -4.27961367 | 7.03E-05    | 0.000546876 |
| 221268_s_at | -0.2335094  | -2.5274829  | 0.014208055 | 0.04642392  |
| 221269_s_at | -0.02347386 | -0.43981336 | 0.661691066 | 0.795737281 |
| 221270_s_at | 0.05555215  | 1.056692072 | 0.294991507 | 0.47389983  |
| 221271_at   | 0.042865751 | 1.356106912 | 0.18027074  | 0.336493335 |
| 221272_s_at | 0.047793538 | 0.977235168 | 0.332472193 | 0.515020181 |
| 221273_s_at | -0.45430481 | -6.92156431 | 3.80E-09    | 2.28E-07    |
| 221274_s_at | 0.156513165 | 3.23219018  | 0.002018635 | 0.009180145 |
| 221275_s_at | -0.00118797 | -0.03940232 | 0.96870364  | 0.98416238  |
| 221276_s_at | 0.492110584 | 4.694444124 | 1.65E-05    | 0.000162646 |
| 221277_s_at | -0.06428512 | -1.40267932 | 0.165991443 | 0.316950696 |
| 221278_at   | 0.017246845 | 0.380317803 | 0.705085393 | 0.826215632 |
| 221279_at   | -0.31367987 | -4.43074137 | 4.18E-05    | 0.000354417 |
| 221280_s_at | -0.02716206 | -0.72529391 | 0.471159928 | 0.647574344 |
| 221281_at   | -0.07929317 | -1.44452589 | 0.153920122 | 0.299686245 |
| 221282_x_at | -0.01454044 | -0.31183225 | 0.756275454 | 0.859779462 |
| 221283_at   | -0.01921786 | -0.380262   | 0.70512659  | 0.826215657 |
| 221284_s_at | -0.02736197 | -0.82365303 | 0.413478289 | 0.595737183 |
| 221285_at   | -0.09441695 | -1.88012553 | 0.065067339 | 0.156714244 |
| 221286_s_at | 0.005876598 | 0.120481681 | 0.904513975 | 0.949423142 |
| 221287_at   | -0.00236028 | -0.06579156 | 0.947767845 | 0.973269009 |
| 221288_at   | -0.28261089 | -5.16024295 | 3.08E-06    | 4.04E-05    |
| 221289_at   | -0.21606278 | -4.1801641  | 9.85E-05    | 0.000727646 |
| 221290_s_at | 0.145826993 | 2.396619496 | 0.01975884  | 0.060984949 |
| 221291_at   | 0.054778014 | 1.846440293 | 0.069883177 | 0.165492544 |
| 221292_at   | -0.05224006 | -1.7346291  | 0.088067061 | 0.197714024 |
| 221293_s_at | -0.00810579 | -0.18568547 | 0.853333034 | 0.919588155 |
| 221294_at   | -0.0778938  | -1.93359637 | 0.058000583 | 0.14319755  |
| 221295_at   | -0.21809506 | -5.21176873 | 2.55E-06    | 3.45E-05    |
| 221296_at   | -0.09943819 | -2.03593617 | 0.046288138 | 0.120162026 |
| 221297_at   | -0.02337315 | -0.46119631 | 0.646366039 | 0.785438627 |
| 221298_s_at | -0.03177808 | -0.50466391 | 0.615688538 | 0.763664303 |
| 221299_at   | -0.0460634  | -1.31879381 | 0.192371751 | 0.351951788 |
| 221300_at   | -0.00629112 | -0.14017027 | 0.88900642  | 0.940546626 |
| 221301_at   | -0.00949578 | -0.29856202 | 0.766331018 | 0.865832385 |
| 221302_at   | 0.052885268 | 1.663655478 | 0.101523854 | 0.220204032 |
| 221303_at   | -0.02733493 | -0.62740189 | 0.532834378 | 0.699718303 |
| 221304_at   | 0.039624085 | 1.12390426  | 0.265639335 | 0.440828531 |
| 221305_s_at | -0.03105845 | -0.66713168 | 0.507308096 | 0.678637894 |
| 221306_at   | -0.09277127 | -2.29822339 | 0.025137369 | 0.074042002 |
| 221307_at   | -0.44082213 | -8.4955094  | 8.45E-12    | 5.15E-09    |
| 221308_at   | -0.09236215 | -2.20617366 | 0.03130739  | 0.088104647 |
| 221309_at   | 0.002877816 | 0.060225065 | 0.952181425 | 0.975492671 |
| 221310_at   | -1.04233335 | -8.7441478  | 3.25E-12    | 3.45E-09    |
| 221311_x_at | -0.01997782 | -0.4251949  | 0.672252855 | 0.802744666 |
| 221312_at   | -0.0565345  | -1.40531433 | 0.165210385 | 0.315794128 |
| 221313_at   | -0.21649836 | -3.50429522 | 0.000884434 | 0.004603137 |
| 221314_at   | -0.04229708 | -0.8776123  | 0.383740206 | 0.566421735 |
| 221315_s_at | 0.054357403 | 2.368101652 | 0.021200451 | 0.064582967 |
| 221316_at   | 0.013663196 | 0.290535524 | 0.772432906 | 0.869780081 |
| 221317_x_at | -0.04139739 | -1.16612728 | 0.248289881 | 0.420483947 |
| 221318_at   | -0.03241465 | -0.59646528 | 0.553163081 | 0.715665946 |
| 221319_at   | 0.013023034 | 0.580705874 | 0.563666661 | 0.724302646 |
| 221320_at   | 0.012928438 | 0.315717773 | 0.753339089 | 0.858074132 |
| 221321_s_at | -1.07868934 | -7.92384577 | 7.72E-11    | 1.82E-08    |
| 221322_at   | -0.05248091 | -1.44327561 | 0.154270589 | 0.300198596 |
| 221323_at   | 0.010038217 | 0.238885887 | 0.81202803  | 0.894530027 |
| 221324_at   | 0.044665406 | 0.879371986 | 0.382793553 | 0.565491338 |
| 221325_at   | -0.02695568 | -0.9854947  | 0.328435076 | 0.510980312 |
| 221326_s_at | -0.00956733 | -0.40850957 | 0.684389445 | 0.81129766  |
| 221327_s_at | 0.011781623 | 0.401687705 | 0.68937595  | 0.814982276 |
| 221328_at   | -0.00121735 | -0.03663198 | 0.970903021 | 0.985267245 |
| 221329_at   | -0.08560909 | -1.594434   | 0.116221806 | 0.243755453 |
| 221330_at   | -0.06553479 | -1.06598397 | 0.290805751 | 0.46917767  |
| 221331_x_at | -0.00566368 | -0.10103465 | 0.919868051 | 0.957868146 |
| 221332_at   | -0.02818432 | -0.5897964  | 0.557595837 | 0.719597998 |
| 221333_at   | 0.010044711 | 0.150333527 | 0.881018045 | 0.936394646 |
| 221334_s_at | 0.072437357 | 1.393706266 | 0.168672579 | 0.320633992 |
| 221335_x_at | 0.022159334 | 0.784617723 | 0.435840009 | 0.616459434 |
| 221336_at   | -0.04502252 | -0.80643938 | 0.423252225 | 0.604982519 |

|             |             |             |             |             |
|-------------|-------------|-------------|-------------|-------------|
| 221337_s_at | -0.00965207 | -0.24206304 | 0.809576944 | 0.893042398 |
| 221338_at   | -0.03373426 | -1.19208611 | 0.238035454 | 0.407518886 |
| 221339_at   | -0.01489213 | -0.31348563 | 0.755025516 | 0.859184202 |
| 221340_at   | 0.003066188 | 0.100051356 | 0.920645259 | 0.958253247 |
| 221341_s_at | -0.01108646 | -0.27801596 | 0.781979255 | 0.875346697 |
| 221342_at   | 0.054423507 | 1.294203192 | 0.200675367 | 0.362708659 |
| 221343_at   | -0.01490951 | -0.5756708  | 0.567043185 | 0.726874946 |
| 221344_at   | 0.013662786 | 0.316146885 | 0.753015025 | 0.857879311 |
| 221345_at   | 0.000775654 | 0.028693844 | 0.977206321 | 0.988575873 |
| 221346_at   | 0.002061439 | 0.0582213   | 0.953770551 | 0.976247933 |
| 221347_at   | -0.00249422 | -0.03770353 | 0.970052285 | 0.984891851 |
| 221348_at   | -0.05442383 | -1.65930811 | 0.102399988 | 0.221620351 |
| 221349_at   | -0.00954711 | -0.49233535 | 0.624322893 | 0.769580354 |
| 221350_at   | -0.0794865  | -1.22801891 | 0.224352385 | 0.391464608 |
| 221351_at   | -0.04440915 | -1.09688209 | 0.277182602 | 0.45381708  |
| 221352_at   | -0.00478722 | -0.12588596 | 0.900253358 | 0.946707524 |
| 221353_at   | -0.00406092 | -0.13145141 | 0.895868753 | 0.94414182  |
| 221354_s_at | 0.016253386 | 0.533576445 | 0.595653939 | 0.748494793 |
| 221355_at   | 0.105134404 | 3.527169656 | 0.000823804 | 0.004335543 |
| 221356_x_at | -0.01142869 | -0.28673297 | 0.775328749 | 0.871312294 |
| 221357_at   | -0.19203093 | -4.20055906 | 9.20E-05    | 0.000686118 |
| 221358_at   | -0.01065717 | -0.2465685  | 0.806104392 | 0.890860966 |
| 221359_at   | 0.038370471 | 1.313719911 | 0.194063519 | 0.354090258 |
| 221360_s_at | -0.02776747 | -0.62287554 | 0.535784307 | 0.702104449 |
| 221361_at   | 0.010110045 | 0.312325472 | 0.755902513 | 0.859599674 |
| 221362_at   | -0.15900665 | -2.97665325 | 0.004231596 | 0.017187902 |
| 221363_x_at | -0.03962845 | -1.15098202 | 0.254417168 | 0.427641375 |
| 221364_at   | -0.0982838  | -2.13932665 | 0.036588331 | 0.099701584 |
| 221365_at   | -0.066288   | -1.69523859 | 0.095341161 | 0.209900845 |
| 221366_at   | -0.02103609 | -0.5480545  | 0.585737433 | 0.740929421 |
| 221367_at   | -0.02287728 | -0.71938692 | 0.474763443 | 0.650703134 |
| 221368_at   | 0.084036006 | 2.142891549 | 0.036288186 | 0.099089436 |
| 221369_at   | 0.046376392 | 1.673477542 | 0.099566927 | 0.216928051 |
| 221370_at   | -0.03557718 | -0.6932566  | 0.490888793 | 0.665054018 |
| 221371_at   | -0.01721102 | -0.39372029 | 0.695217357 | 0.819424614 |
| 221372_s_at | -0.05299508 | -1.39832496 | 0.167288385 | 0.318784485 |
| 221373_x_at | -0.04002949 | -1.33622153 | 0.186645577 | 0.344550356 |
| 221374_at   | -0.01024833 | -0.24271004 | 0.809078029 | 0.892778511 |
| 221375_at   | -0.07049403 | -1.37931111 | 0.173043295 | 0.326616246 |
| 221376_at   | -0.08806339 | -1.70109527 | 0.094229358 | 0.208129805 |
| 221377_s_at | -0.01261808 | -0.28726513 | 0.774923289 | 0.871065937 |
| 221378_at   | 0.041452425 | 0.670360929 | 0.505262632 | 0.677016177 |
| 221379_at   | 0.06435241  | 1.591278665 | 0.116930696 | 0.24489554  |
| 221380_at   | -0.05644513 | -0.9463572  | 0.347854756 | 0.530881189 |
| 221381_s_at | -0.08822709 | -0.97762094 | 0.332282905 | 0.514834029 |
| 221382_at   | -0.02453057 | -0.43041427 | 0.668474115 | 0.800203828 |
| 221383_at   | 0.02915765  | 0.670871932 | 0.504939363 | 0.676767971 |
| 221384_at   | -0.00699978 | -0.19498604 | 0.846078735 | 0.915420526 |
| 221385_s_at | -0.00363655 | -0.07705734 | 0.938840577 | 0.968083223 |
| 221386_at   | -0.04281215 | -1.07295565 | 0.287692226 | 0.465869813 |
| 221387_at   | -0.02276748 | -0.40620725 | 0.686070785 | 0.812500232 |
| 221388_at   | -0.0434347  | -0.64087486 | 0.524103892 | 0.692667705 |
| 221389_at   | 0.035764547 | 0.86247458  | 0.391944386 | 0.574745192 |
| 221390_s_at | -0.02284351 | -0.3608814  | 0.719486596 | 0.835832053 |
| 221391_at   | 0.035425402 | 1.144928627 | 0.256896123 | 0.430587421 |
| 221392_at   | -0.01651475 | -0.32512499 | 0.746245095 | 0.853167885 |
| 221393_at   | -0.01514336 | -0.26429735 | 0.792478667 | 0.881842684 |
| 221394_at   | 0.02885854  | 0.655139387 | 0.51494311  | 0.685302765 |
| 221395_at   | -0.01959428 | -0.66828162 | 0.506579192 | 0.678109362 |
| 221396_at   | -0.00662203 | -0.2253386  | 0.822500329 | 0.90138017  |
| 221397_at   | 0.029042276 | 0.869827355 | 0.387945856 | 0.570621216 |
| 221398_at   | 0.000682469 | 0.017801442 | 0.985857762 | 0.993167574 |
| 221399_at   | 0.047500876 | 1.254610522 | 0.214604038 | 0.380341979 |
| 221400_at   | -0.01013518 | -0.22458353 | 0.823084986 | 0.901778449 |
| 221401_at   | 0.026762058 | 0.72313951  | 0.472472409 | 0.648677098 |
| 221402_at   | 0.000349169 | 0.009056376 | 0.992804935 | 0.996856236 |
| 221403_s_at | -0.01580809 | -0.45991396 | 0.647280849 | 0.786051729 |
| 221404_at   | -0.06094697 | -0.90234854 | 0.370567988 | 0.553838228 |
| 221405_at   | -0.01298162 | -0.32152419 | 0.748957899 | 0.855197405 |
| 221406_s_at | 0.058328749 | 2.063665621 | 0.043489916 | 0.114359339 |
| 221407_at   | -0.02261502 | -0.42119742 | 0.675152731 | 0.80478825  |
| 221408_x_at | 0.023656792 | 0.577632341 | 0.565726591 | 0.726138018 |
| 221409_at   | -0.02083558 | -0.47710291 | 0.635064416 | 0.777446183 |
| 221410_x_at | -0.05066433 | -1.4624699  | 0.148958307 | 0.292815261 |
| 221411_at   | -0.01658726 | -0.63745415 | 0.526313371 | 0.694601854 |

|             |             |             |             |             |
|-------------|-------------|-------------|-------------|-------------|
| 221412_at   | -0.04323784 | -1.17272122 | 0.245655533 | 0.417049842 |
| 221413_at   | -0.03434704 | -0.94765363 | 0.347199709 | 0.530226762 |
| 221414_s_at | 0.021496763 | 0.730141222 | 0.468214465 | 0.645247619 |
| 221415_s_at | 0.043580363 | 0.986136248 | 0.328122869 | 0.510672352 |
| 221416_at   | 0.031342391 | 0.919982207 | 0.361355925 | 0.544476552 |
| 221417_x_at | 0.043243022 | 0.748153945 | 0.457361192 | 0.63612775  |
| 221418_s_at | -0.06730393 | -1.3076631  | 0.196097653 | 0.356767608 |
| 221419_s_at | 0.244102135 | 1.772779008 | 0.081465731 | 0.18628122  |
| 221420_at   | 0.006053737 | 0.251663128 | 0.80218246  | 0.888415981 |
| 221421_s_at | -0.03490819 | -0.7937353  | 0.430553814 | 0.61139969  |
| 221422_s_at | -0.19750948 | -4.37053398 | 5.14E-05    | 0.000421898 |
| 221423_s_at | -0.30853892 | -4.28787506 | 6.83E-05    | 0.000533874 |
| 221424_s_at | 0.005966267 | 0.171777316 | 0.864204778 | 0.926367494 |
| 221425_s_at | -0.21400792 | -4.38744388 | 4.85E-05    | 0.000401186 |
| 221426_s_at | 0.052328936 | 1.55475858  | 0.125391304 | 0.258200708 |
| 221427_s_at | 0.162012702 | 3.282822712 | 0.001736151 | 0.008101069 |
| 221428_s_at | -0.11579921 | -1.0693415  | 0.2893034   | 0.46761474  |
| 221429_x_at | -0.01134904 | -0.17823865 | 0.859150662 | 0.923275017 |
| 221430_s_at | -0.12337659 | -1.48407356 | 0.143151722 | 0.284495587 |
| 221431_s_at | -0.02185145 | -0.53326222 | 0.595870029 | 0.748657291 |
| 221432_s_at | 0.033835    | 0.887021845 | 0.378695272 | 0.561292379 |
| 221433_at   | -0.04241564 | -0.91802505 | 0.362371043 | 0.545594274 |
| 221434_s_at | -0.52428573 | -4.09469213 | 0.00013139  | 0.00092854  |
| 221435_x_at | 0.152646619 | 4.421736823 | 4.31E-05    | 0.000363584 |
| 221436_s_at | -0.02562346 | -0.54369266 | 0.588716723 | 0.743288542 |
| 221437_s_at | -0.16031897 | -4.74159179 | 1.40E-05    | 0.000141136 |
| 221438_s_at | 0.002118109 | 0.134867914 | 0.893178753 | 0.942884184 |
| 221439_at   | 0.014243506 | 0.472736126 | 0.638158487 | 0.779804755 |
| 221440_s_at | -0.0124979  | -0.63197875 | 0.529860132 | 0.697182742 |
| 221441_at   | 0.015297656 | 0.625945655 | 0.533782522 | 0.700489903 |
| 221442_at   | 0.001236969 | 0.04056809  | 0.967778206 | 0.983602292 |
| 221443_x_at | -0.00714801 | -0.10559752 | 0.916262537 | 0.955538568 |
| 221444_at   | -0.00697387 | -0.12512311 | 0.900854591 | 0.94713441  |
| 221445_at   | -0.09047731 | -1.68490841 | 0.097328443 | 0.213183826 |
| 221446_at   | 0.007984482 | 0.176019914 | 0.860885521 | 0.924221291 |
| 221447_s_at | -0.09734916 | -2.68898832 | 0.009319472 | 0.032966995 |
| 221448_s_at | -0.03566573 | -0.82568122 | 0.412335774 | 0.594592496 |
| 221449_s_at | -0.9604857  | -6.28714652 | 4.41E-08    | 1.33E-06    |
| 221450_x_at | -0.01018137 | -0.29893684 | 0.76604643  | 0.86564215  |
| 221451_s_at | -0.02005753 | -0.54608215 | 0.587083728 | 0.741960409 |
| 221452_s_at | -0.31797174 | -2.3652212  | 0.021351165 | 0.064957541 |
| 221453_at   | 0.038685307 | 0.918712512 | 0.36201427  | 0.545196358 |
| 221454_at   | -0.03326353 | -0.74815131 | 0.457362769 | 0.63612775  |
| 221455_s_at | 0.021756191 | 0.708355314 | 0.481534561 | 0.656782935 |
| 221456_at   | -0.03357618 | -0.88483946 | 0.379861614 | 0.562554685 |
| 221457_s_at | -0.05183182 | -1.15752188 | 0.251758236 | 0.424638268 |
| 221458_at   | 0.03758201  | 0.559705527 | 0.577814772 | 0.734838591 |
| 221459_at   | 0.031235894 | 0.613660997 | 0.541815599 | 0.70682378  |
| 221460_at   | 0.017788288 | 0.388648612 | 0.698945439 | 0.821860386 |
| 221461_at   | -0.03302562 | -0.86321928 | 0.391538245 | 0.574328057 |
| 221462_x_at | 0.039390986 | 1.149846215 | 0.254880992 | 0.428141821 |
| 221463_at   | 0.00490602  | 0.128442897 | 0.898238541 | 0.945478623 |
| 221464_at   | -0.05110274 | -0.93384985 | 0.354215659 | 0.537368683 |
| 221465_at   | 0.050441828 | 1.100866392 | 0.275458895 | 0.4518533   |
| 221466_at   | 0.006949005 | 0.162164352 | 0.871734625 | 0.930774862 |
| 221467_at   | -0.09499718 | -1.81364059 | 0.074857351 | 0.174391405 |
| 221468_at   | 0.022197639 | 0.721837631 | 0.473266524 | 0.649268732 |
| 221469_at   | -0.05888089 | -1.21982902 | 0.227419192 | 0.394895428 |
| 221470_s_at | 0.00015412  | 0.00499397  | 0.996032377 | 0.998042218 |
| 221471_at   | -0.20740758 | -2.7685923  | 0.007526653 | 0.027645178 |
| 221472_at   | 0.085106666 | 2.189488855 | 0.032558542 | 0.090893021 |
| 221473_x_at | -0.10118222 | -1.60005272 | 0.11496806  | 0.241761283 |
| 221474_at   | -0.04321382 | -1.31132864 | 0.194864702 | 0.355071543 |
| 221475_s_at | -0.14187368 | -2.40159716 | 0.01951641  | 0.060404768 |
| 221476_s_at | -0.24841687 | -5.83221452 | 2.50E-07    | 5.16E-06    |
| 221477_s_at | 0.101558416 | 0.669317737 | 0.505922921 | 0.677533796 |
| 221478_at   | -0.04632818 | -0.49639738 | 0.621472106 | 0.767536169 |
| 221479_s_at | 0.116205653 | 1.949402267 | 0.056041215 | 0.139477307 |
| 221480_at   | -0.13904142 | -2.76637928 | 0.007571876 | 0.027776804 |
| 221481_x_at | 0.145503167 | 3.072975731 | 0.003214652 | 0.013616645 |
| 221482_s_at | -1.02439572 | -7.33093736 | 7.74E-10    | 7.93E-08    |
| 221483_s_at | -0.14103676 | -2.58818798 | 0.012148186 | 0.040895356 |
| 221484_at   | -0.11518988 | -1.71857929 | 0.09097356  | 0.202580485 |
| 221485_at   | -0.08855448 | -1.45954422 | 0.149758653 | 0.293862562 |
| 221486_at   | 0.208866446 | 4.709161636 | 1.57E-05    | 0.000156182 |

|             |             |             |             |             |
|-------------|-------------|-------------|-------------|-------------|
| 221487_s_at | 0.05267548  | 1.016350951 | 0.313642682 | 0.494737163 |
| 221488_s_at | -0.21098319 | -3.03882721 | 0.003545739 | 0.014796094 |
| 221489_s_at | -0.012828   | -0.35609969 | 0.723045501 | 0.838099194 |
| 221490_at   | 0.063160368 | 2.096641748 | 0.040354081 | 0.107619603 |
| 221491_x_at | 0.036454315 | 0.816887098 | 0.417303542 | 0.599682633 |
| 221492_s_at | -0.00580296 | -0.07038016 | 0.944130852 | 0.971186703 |
| 221493_at   | -0.67695323 | -5.38106048 | 1.36E-06    | 2.05E-05    |
| 221494_x_at | -0.12172498 | -2.65504658 | 0.01019657  | 0.035430346 |
| 221495_s_at | -0.28515047 | -4.67208606 | 1.79E-05    | 0.000173702 |
| 221496_s_at | 0.821050394 | 7.607946336 | 2.63E-10    | 3.88E-08    |
| 221497_x_at | -0.01999113 | -0.4740596  | 0.637220055 | 0.778977508 |
| 221498_at   | -0.22751148 | -5.25374037 | 2.18E-06    | 3.04E-05    |
| 221499_s_at | 0.141738204 | 2.038962631 | 0.045975355 | 0.119551438 |
| 221500_s_at | 0.316744393 | 4.51580033  | 3.10E-05    | 0.000276021 |
| 221501_x_at | 0.116446013 | 2.296079432 | 0.025267812 | 0.07433314  |
| 221502_at   | -0.04823379 | -0.89785989 | 0.372936601 | 0.556029071 |
| 221503_s_at | -0.0118546  | -0.20346322 | 0.83947828  | 0.911470854 |
| 221504_s_at | -0.72378622 | -6.30442165 | 4.12E-08    | 1.27E-06    |
| 221505_at   | 0.164387321 | 2.427569319 | 0.018294198 | 0.057317118 |
| 221506_s_at | -0.02539474 | -0.54952705 | 0.584733251 | 0.740245827 |
| 221507_at   | -0.06577549 | -1.5393929  | 0.129094323 | 0.263776852 |
| 221508_at   | 0.030473869 | 1.381706516 | 0.172310028 | 0.325569172 |
| 221509_at   | 0.092185692 | 1.180236365 | 0.242677741 | 0.413344777 |
| 221510_s_at | -0.00831685 | -0.25405382 | 0.800343819 | 0.88710513  |
| 221511_x_at | -0.02819085 | -0.55068109 | 0.583946849 | 0.739675496 |
| 221512_at   | 0.102197957 | 2.399831782 | 0.019602084 | 0.060588998 |
| 221513_s_at | -0.06931694 | -1.95835172 | 0.054957078 | 0.137407211 |
| 221514_at   | -0.00100909 | -0.02775918 | 0.977948596 | 0.988805552 |
| 221515_s_at | -0.32249975 | -4.83807063 | 9.91E-06    | 0.000106001 |
| 221516_s_at | -0.0644732  | -1.79604989 | 0.077645069 | 0.179389652 |
| 221517_s_at | 0.039467389 | 0.786848532 | 0.434543093 | 0.615231857 |
| 221518_s_at | 0.439488427 | 6.498496849 | 1.95E-08    | 7.26E-07    |
| 221519_at   | 0.312345573 | 5.520327355 | 8.10E-07    | 1.35E-05    |
| 221520_s_at | 0.025406091 | 0.688098354 | 0.494107338 | 0.667614671 |
| 221521_s_at | 0.073397763 | 1.689676231 | 0.096407045 | 0.211746789 |
| 221522_at   | 0.18648057  | 2.601363551 | 0.01173862  | 0.039737991 |
| 221523_s_at | -0.33277035 | -3.37127463 | 0.001330023 | 0.006478625 |
| 221524_s_at | -0.00431311 | -0.06842079 | 0.945683737 | 0.972044562 |
| 221525_at   | -0.09962048 | -1.95054738 | 0.055901485 | 0.139240147 |
| 221526_x_at | 0.140637429 | 2.2251783   | 0.029933996 | 0.084994292 |
| 221527_s_at | 0.363880904 | 4.628233436 | 2.09E-05    | 0.000198537 |
| 221528_s_at | -0.15305137 | -2.71655525 | 0.008658522 | 0.031036788 |
| 221529_s_at | -0.01826983 | -0.41687649 | 0.67829281  | 0.807174945 |
| 221530_s_at | 0.402667012 | 3.236501371 | 0.001992992 | 0.009087003 |
| 221531_at   | -0.14369378 | -1.81612907 | 0.074469836 | 0.173678752 |
| 221532_s_at | -0.07478994 | -0.69674731 | 0.488717306 | 0.663125394 |
| 221533_at   | -0.12175583 | -2.73095735 | 0.008330569 | 0.030074348 |
| 221534_at   | 0.001132693 | 0.043409374 | 0.965522869 | 0.982437489 |
| 221535_at   | -0.04835456 | -0.87956073 | 0.3826921   | 0.565378841 |
| 221536_s_at | 0.097927953 | 1.339133778 | 0.185701434 | 0.343452735 |
| 221537_at   | 0.009319552 | 0.209335739 | 0.834912608 | 0.908942665 |
| 221538_s_at | 0.244561828 | 3.486879859 | 0.000933415 | 0.004812111 |
| 221539_at   | 0.080417346 | 1.641659091 | 0.106020407 | 0.227549538 |
| 221540_x_at | 0.121353785 | 1.651411442 | 0.1040072   | 0.224338309 |
| 221541_at   | 0.20187513  | 2.640709996 | 0.010589193 | 0.036506633 |
| 221542_s_at | 0.342574547 | 4.163982791 | 0.000104073 | 0.000762124 |
| 221543_s_at | 0.707225937 | 5.967578588 | 1.50E-07    | 3.44E-06    |
| 221544_s_at | -0.00635581 | -0.12544482 | 0.900601029 | 0.946961726 |
| 221545_x_at | 0.137479718 | 3.432353378 | 0.001103977 | 0.005529413 |
| 221546_at   | -0.0255127  | -0.50676138 | 0.614224937 | 0.762356724 |
| 221547_at   | -0.11110985 | -1.56701511 | 0.122498861 | 0.253553125 |
| 221548_s_at | 0.184067184 | 3.569721427 | 0.000721385 | 0.003890917 |
| 221549_at   | -0.07327204 | -1.64841727 | 0.104621954 | 0.225327184 |
| 221550_at   | -0.04975991 | -2.13897795 | 0.036617806 | 0.099741712 |
| 221551_x_at | 0.021341431 | 0.585937154 | 0.560169122 | 0.721638373 |
| 221552_at   | -0.03395362 | -0.58874554 | 0.55829595  | 0.720076264 |
| 221553_at   | 0.293959242 | 3.755253261 | 0.000400489 | 0.002373829 |
| 221554_at   | 0.090818411 | 2.836530369 | 0.006253556 | 0.023716849 |
| 221555_x_at | 0.42422565  | 8.754020219 | 3.13E-12    | 3.45E-09    |
| 221556_at   | 0.373202825 | 4.546476759 | 2.79E-05    | 0.00025238  |
| 221557_s_at | -0.04982513 | -1.15278208 | 0.253683321 | 0.426720766 |
| 221558_s_at | 0.514984342 | 6.529526195 | 1.73E-08    | 6.64E-07    |
| 221559_s_at | 0.131033254 | 2.265424697 | 0.027199713 | 0.078710798 |
| 221560_at   | -0.27620368 | -5.36357016 | 1.45E-06    | 2.17E-05    |
| 221561_at   | 0.06972545  | 2.354539263 | 0.021918464 | 0.066353721 |

|             |             |             |             |             |
|-------------|-------------|-------------|-------------|-------------|
| 221562_s_at | -0.20993995 | -4.81884628 | 1.06E-05    | 0.000112093 |
| 221563_at   | 0.234468631 | 3.279376443 | 0.00175413  | 0.008169608 |
| 221564_at   | 0.222044904 | 4.05407601  | 0.000150498 | 0.001036694 |
| 221565_s_at | 0.05288331  | 1.303203392 | 0.197605625 | 0.358591465 |
| 221566_s_at | 0.137709956 | 3.658891578 | 0.000544714 | 0.003079617 |
| 221567_at   | 0.150497038 | 3.704928448 | 0.000470515 | 0.00272105  |
| 221568_s_at | 0.136072769 | 2.243697587 | 0.028647061 | 0.082075418 |
| 221569_at   | -0.0449054  | -0.68659813 | 0.495045587 | 0.668356196 |
| 221570_s_at | -0.05649434 | -0.78746677 | 0.434184077 | 0.614924412 |
| 221571_at   | 0.271508151 | 5.171984117 | 2.95E-06    | 3.89E-05    |
| 221572_s_at | 0.086434536 | 1.645443976 | 0.105235349 | 0.226290265 |
| 221573_at   | 0.006324792 | 0.203974784 | 0.839080337 | 0.911149462 |
| 221575_at   | -0.02002255 | -0.57953226 | 0.5644528   | 0.724962627 |
| 221576_at   | 0.036900849 | 1.348465531 | 0.1827005   | 0.339563632 |
| 221577_x_at | -0.00431592 | -0.09407443 | 0.925371139 | 0.960860757 |
| 221578_at   | 0.168479796 | 2.914790775 | 0.005034863 | 0.019828877 |
| 221579_s_at | -0.01368886 | -0.2891925  | 0.773455323 | 0.870302912 |
| 221580_s_at | -0.03100096 | -0.4663075  | 0.642725244 | 0.78292457  |
| 221581_s_at | 0.211014047 | 3.063474873 | 0.003303744 | 0.013934589 |
| 221582_at   | -0.13991812 | -3.69043788 | 0.00049276  | 0.002829917 |
| 221583_s_at | -0.18985088 | -3.95442589 | 0.000209426 | 0.001369973 |
| 221584_s_at | 0.034685699 | 0.513847865 | 0.609291715 | 0.758508784 |
| 221585_at   | -0.43903705 | -5.4254122  | 1.15E-06    | 1.79E-05    |
| 221586_s_at | -0.03992011 | -1.53527904 | 0.130100382 | 0.265414995 |
| 221587_s_at | 0.068340932 | 2.007371177 | 0.049331919 | 0.126151063 |
| 221588_x_at | 0.350808514 | 5.326598378 | 1.67E-06    | 2.44E-05    |
| 221589_s_at | 0.470177596 | 4.429092866 | 4.20E-05    | 0.000356179 |
| 221590_s_at | 0.202827478 | 2.29601734  | 0.025271599 | 0.074339387 |
| 221591_s_at | -0.01963607 | -0.42040601 | 0.675727429 | 0.805175688 |
| 221592_at   | -0.05764619 | -1.48905989 | 0.141837142 | 0.282662335 |
| 221593_s_at | 0.069612545 | 1.459783415 | 0.149693092 | 0.293759712 |
| 221594_at   | -0.03585685 | -0.72638026 | 0.4704989   | 0.64706683  |
| 221595_at   | 0.161355723 | 4.060545636 | 0.000147284 | 0.001019268 |
| 221596_s_at | 0.054228115 | 0.629011906 | 0.531787132 | 0.69889521  |
| 221597_s_at | -0.08167002 | -1.609898   | 0.112797545 | 0.238329609 |
| 221598_s_at | -0.09934982 | -2.39928201 | 0.019628833 | 0.060663287 |
| 221599_at   | 0.26218802  | 5.727490437 | 3.72E-07    | 7.12E-06    |
| 221600_s_at | 0.038898119 | 0.910462159 | 0.36631089  | 0.549557026 |
| 221601_s_at | -0.00573127 | -0.14473549 | 0.885416651 | 0.938609221 |
| 221602_s_at | 0.022618083 | 0.577266021 | 0.565972351 | 0.726308974 |
| 221603_at   | 0.007848125 | 0.203234993 | 0.839655834 | 0.91160038  |
| 221604_s_at | -0.13711434 | -2.56403139 | 0.012932988 | 0.043011248 |
| 221605_s_at | 0.108878371 | 2.442322013 | 0.017630981 | 0.055598834 |
| 221606_s_at | 0.213203755 | 3.930453051 | 0.000226619 | 0.001467195 |
| 221607_x_at | -0.08954991 | -1.33719135 | 0.186330762 | 0.344068687 |
| 221608_at   | -0.00769711 | -0.22008191 | 0.826572713 | 0.903808343 |
| 221609_s_at | -0.20932173 | -4.63167697 | 2.07E-05    | 0.000196547 |
| 221610_s_at | -0.0195238  | -0.54098877 | 0.59056717  | 0.744594126 |
| 221611_s_at | 0.002312892 | 0.058492142 | 0.953555744 | 0.976117486 |
| 221612_at   | 0.006820588 | 0.159510894 | 0.873815214 | 0.932160631 |
| 221613_s_at | 0.198185678 | 2.884936255 | 0.005471159 | 0.021218435 |
| 221614_s_at | 0.093516772 | 2.678126738 | 0.009592338 | 0.033732062 |
| 221615_at   | -0.06941116 | -2.04336326 | 0.045523812 | 0.118540791 |
| 221616_s_at | 0.150299317 | 3.838210572 | 0.000306333 | 0.001896207 |
| 221617_at   | 0.044003707 | 1.592418138 | 0.116674297 | 0.244475019 |
| 221618_s_at | -0.22931886 | -2.9063491  | 0.005154841 | 0.020210559 |
| 221619_s_at | -0.17597074 | -3.14546464 | 0.002605282 | 0.011393998 |
| 221620_s_at | -0.33850603 | -6.13841327 | 7.80E-08    | 2.08E-06    |
| 221621_at   | -0.00579003 | -0.22224231 | 0.824898455 | 0.902783851 |
| 221622_s_at | -0.30244029 | -4.30283668 | 6.49E-05    | 0.000511601 |
| 221623_at   | 0.358719591 | 4.835115756 | 1.00E-05    | 0.000106998 |
| 221624_at   | -0.06106472 | -1.25012191 | 0.216227203 | 0.382254949 |
| 221625_at   | 0.010969348 | 0.352429667 | 0.72578119  | 0.839828155 |
| 221626_at   | 0.039262287 | 1.293018162 | 0.201082196 | 0.363238217 |
| 221627_at   | -0.00298989 | -0.06650948 | 0.947198739 | 0.972863422 |
| 221628_s_at | -0.19819439 | -3.73311461 | 0.000429969 | 0.002519491 |
| 221629_x_at | 0.03926568  | 0.977344896 | 0.332418345 | 0.514954616 |
| 221630_s_at | -0.01005786 | -0.38191887 | 0.703903833 | 0.825453809 |
| 221631_at   | -0.44065819 | -6.33628568 | 3.65E-08    | 1.16E-06    |
| 221632_s_at | 0.055494619 | 1.671283112 | 0.100001442 | 0.217627095 |
| 221633_at   | 0.020436893 | 0.537034503 | 0.593278267 | 0.746544487 |
| 221634_at   | 0.050779151 | 1.226411834 | 0.224951771 | 0.392195699 |
| 221636_s_at | 0.123718589 | 2.152463548 | 0.035492902 | 0.097332398 |
| 221637_s_at | 0.060901193 | 1.419547731 | 0.161040352 | 0.30978416  |
| 221638_s_at | -0.18966074 | -3.14349571 | 0.002620295 | 0.011450692 |



|             |             |             |             |             |
|-------------|-------------|-------------|-------------|-------------|
| 221639_x_at | 0.008553847 | 0.361034267 | 0.719372919 | 0.835765169 |
| 221640_s_at | 0.334258995 | 6.207376624 | 5.99E-08    | 1.70E-06    |
| 221641_s_at | 0.198864003 | 3.516357756 | 0.000851952 | 0.004456393 |
| 221642_at   | 0.023744954 | 0.910789889 | 0.366139595 | 0.549446771 |
| 221643_s_at | -0.13918277 | -1.61774556 | 0.111091283 | 0.235649134 |
| 221644_s_at | -0.02496381 | -0.6551689  | 0.514924248 | 0.68529807  |
| 221645_s_at | 0.064937971 | 0.640412268 | 0.524402401 | 0.692939273 |
| 221646_s_at | 0.360958176 | 2.302681286 | 0.024868054 | 0.073408393 |
| 221647_s_at | -0.00759436 | -0.27450942 | 0.784659166 | 0.877138256 |
| 221648_s_at | 0.023188056 | 0.806473929 | 0.423232469 | 0.604973629 |
| 221649_s_at | -0.04017175 | -0.70965353 | 0.480734935 | 0.65597062  |
| 221650_s_at | 0.103320411 | 2.334017947 | 0.023046178 | 0.069076375 |
| 221651_x_at | 0.06204881  | 1.285420478 | 0.20370521  | 0.366638203 |
| 221652_s_at | 0.057076886 | 0.718832106 | 0.475102697 | 0.651060667 |
| 221653_x_at | 0.200118304 | 2.712296823 | 0.008757735 | 0.031307046 |
| 221654_s_at | 0.224231588 | 3.825702591 | 0.000319025 | 0.001959843 |
| 221655_x_at | 0.000595826 | 0.010953107 | 0.991298086 | 0.99594751  |
| 221656_s_at | 0.253339964 | 5.311153386 | 1.76E-06    | 2.56E-05    |
| 221657_s_at | -0.13747852 | -3.52957597 | 0.00081766  | 0.00430727  |
| 221658_s_at | 0.048027744 | 1.123343473 | 0.265875389 | 0.441117402 |
| 221659_s_at | -0.0078299  | -0.21865451 | 0.827679358 | 0.904419762 |
| 221660_at   | -0.09080936 | -1.44292901 | 0.154367857 | 0.300366239 |
| 221661_at   | 0.016761122 | 0.625310435 | 0.534196381 | 0.700825006 |
| 221662_s_at | 0.012397964 | 0.258397524 | 0.797006062 | 0.884831949 |
| 221663_x_at | -0.20222925 | -4.52587326 | 3.00E-05    | 0.000268254 |
| 221664_s_at | 0.111984195 | 2.630366358 | 0.010880976 | 0.03731527  |
| 221665_s_at | 0.00718253  | 0.187724504 | 0.851741509 | 0.918586056 |
| 221666_s_at | 0.139580275 | 3.31331065  | 0.001584495 | 0.007501508 |
| 221667_s_at | 0.817643744 | 6.43767661  | 2.47E-08    | 8.57E-07    |
| 221668_s_at | 0.154899274 | 3.151649543 | 0.002558645 | 0.011216379 |
| 221669_s_at | -0.09239825 | -1.93746918 | 0.057515169 | 0.142282072 |
| 221670_s_at | 0.002005245 | 0.046699294 | 0.962911771 | 0.981101794 |
| 221671_x_at | 0.031591004 | 0.686058229 | 0.495383484 | 0.668529114 |
| 221672_s_at | -0.16993835 | -3.75671227 | 0.000398616 | 0.002365864 |
| 221673_s_at | -0.00182076 | -0.04405928 | 0.965007031 | 0.98212589  |
| 221674_s_at | 0.018637384 | 0.676975926 | 0.501086527 | 0.673500154 |
| 221675_s_at | 0.245504548 | 3.298068968 | 0.001658677 | 0.007795474 |
| 221676_s_at | 0.183566196 | 2.409390753 | 0.019142186 | 0.059488393 |
| 221677_s_at | 0.063565185 | 1.530832078 | 0.131194915 | 0.267050607 |
| 221678_at   | -0.06269017 | -1.34393787 | 0.184151881 | 0.341356942 |
| 221679_s_at | -0.16501094 | -2.19519353 | 0.032125906 | 0.090000062 |
| 221680_s_at | -0.05548772 | -0.93114782 | 0.355599683 | 0.538672712 |
| 221681_s_at | 0.06603132  | 1.385711888 | 0.171089257 | 0.323979583 |
| 221682_s_at | -0.01565655 | -0.58706713 | 0.559415058 | 0.721041062 |
| 221683_s_at | 0.021585105 | 0.873431444 | 0.385995253 | 0.568679738 |
| 221684_s_at | 0.004335539 | 0.09896993  | 0.921500122 | 0.958834365 |
| 221685_s_at | -0.00953429 | -0.32094372 | 0.749395512 | 0.855544083 |
| 221686_s_at | 0.003224417 | 0.07590853  | 0.939750582 | 0.968462955 |
| 221687_s_at | 0.06040958  | 1.084974354 | 0.282379044 | 0.459668804 |
| 221688_s_at | -0.19157362 | -3.54951979 | 0.000768397 | 0.004099462 |
| 221689_s_at | -0.05973438 | -0.88211783 | 0.381319315 | 0.564106953 |
| 221690_s_at | -0.00859127 | -0.22698463 | 0.821226149 | 0.900602141 |
| 221691_x_at | -0.03111926 | -0.50979678 | 0.612109648 | 0.76072424  |
| 221692_s_at | -0.28234517 | -5.09270904 | 3.94E-06    | 4.96E-05    |
| 221693_s_at | -0.08237537 | -2.76602457 | 0.007579148 | 0.027798711 |
| 221695_s_at | -0.07990663 | -1.77694139 | 0.08077107  | 0.185062065 |
| 221696_s_at | -0.13505722 | -4.16715614 | 0.000102964 | 0.000755733 |
| 221697_at   | 0.046655495 | 1.45402611  | 0.151277332 | 0.296088575 |
| 221698_s_at | 0.160769697 | 2.682171455 | 0.009489884 | 0.03344546  |
| 221699_s_at | 0.012597015 | 0.176121733 | 0.860805893 | 0.92420438  |
| 221700_s_at | -0.01097718 | -0.26290361 | 0.793547547 | 0.882461046 |
| 221701_s_at | -0.01956689 | -0.43758141 | 0.663299253 | 0.796822636 |
| 221702_s_at | -0.22495334 | -2.71193617 | 0.008766185 | 0.031334747 |
| 221703_at   | 0.001124667 | 0.050539622 | 0.959864351 | 0.979463377 |
| 221704_s_at | 0.231886079 | 4.328541484 | 5.94E-05    | 0.000475463 |
| 221705_s_at | 0.089236189 | 2.883827767 | 0.005488013 | 0.021270514 |
| 221706_s_at | -0.01717015 | -0.45801787 | 0.648634502 | 0.786878181 |
| 221707_s_at | -0.03115177 | -0.79046928 | 0.432442991 | 0.613276209 |
| 221708_s_at | 0.056200258 | 1.65432367  | 0.103412096 | 0.223296265 |
| 221709_s_at | -0.00045668 | -0.00900992 | 0.99284184  | 0.996856236 |
| 221710_x_at | 0.065358371 | 1.621293615 | 0.110326734 | 0.23446136  |
| 221711_s_at | -0.17694165 | -3.60426681 | 0.000647278 | 0.003558197 |
| 221712_s_at | -0.08879291 | -2.47613797 | 0.016191633 | 0.051825284 |
| 221713_s_at | -0.00110905 | -0.01350475 | 0.989270996 | 0.9949255   |
| 221714_s_at | -0.02288571 | -0.68667624 | 0.494996714 | 0.668356196 |

|             |             |             |             |             |
|-------------|-------------|-------------|-------------|-------------|
| 221715_at   | 0.04152032  | 1.863371492 | 0.067426322 | 0.161136687 |
| 221716_s_at | -0.02427803 | -0.49124832 | 0.625086771 | 0.770249183 |
| 221717_at   | 0.021816168 | 0.583178771 | 0.562011982 | 0.723149528 |
| 221718_s_at | 0.159310154 | 2.521791694 | 0.014416536 | 0.046995175 |
| 221719_s_at | -0.0484372  | -0.92938945 | 0.356502222 | 0.539675361 |
| 221720_s_at | -0.01885097 | -0.66517804 | 0.508547728 | 0.679677592 |
| 221721_s_at | -0.0266423  | -1.15445487 | 0.253002716 | 0.425979407 |
| 221722_x_at | -0.11470536 | -3.00143469 | 0.003944622 | 0.016210855 |
| 221723_s_at | -0.03656586 | -0.80989607 | 0.421278454 | 0.603214157 |
| 221724_s_at | 0.018229235 | 0.727087543 | 0.470068811 | 0.646755545 |
| 221725_at   | 0.449548011 | 7.840353759 | 1.07E-10    | 2.18E-08    |
| 221726_at   | -0.13714214 | -2.81698888 | 0.006597727 | 0.024786956 |
| 221727_at   | -0.72818774 | -6.19581918 | 6.26E-08    | 1.75E-06    |
| 221728_x_at | 0.08807094  | 0.345191753 | 0.731186935 | 0.843211846 |
| 221729_at   | 0.136618128 | 2.861445116 | 0.005838788 | 0.022389285 |
| 221730_at   | 0.058369404 | 1.616263356 | 0.111411942 | 0.236183593 |
| 221731_x_at | 1.099814543 | 8.778243355 | 2.85E-12    | 3.44E-09    |
| 221732_at   | 0.041107576 | 1.076312194 | 0.286201463 | 0.464094763 |
| 221733_s_at | -0.00736611 | -0.19239726 | 0.848096629 | 0.916464398 |
| 221734_at   | 0.170178366 | 4.282609164 | 6.95E-05    | 0.000542343 |
| 221735_at   | 0.021631575 | 0.521213623 | 0.60418332  | 0.754702123 |
| 221736_at   | -0.07768756 | -1.3566429  | 0.180101238 | 0.336274137 |
| 221737_at   | 0.303034164 | 4.567792697 | 2.59E-05    | 0.000237606 |
| 221738_at   | -0.02971553 | -1.01133369 | 0.316016846 | 0.49723366  |
| 221739_at   | 0.023702399 | 0.712688983 | 0.478868176 | 0.654362396 |
| 221740_x_at | 0.140763352 | 4.184397481 | 9.71E-05    | 0.000718486 |
| 221741_s_at | 0.163916694 | 2.64843112  | 0.01037606  | 0.03592554  |
| 221742_at   | -0.12240673 | -2.67897218 | 0.00957084  | 0.033668403 |
| 221743_at   | -0.19667613 | -3.849687   | 0.000295115 | 0.001836945 |
| 221744_at   | 0.007135739 | 0.257549189 | 0.797657637 | 0.885351044 |
| 221745_at   | 0.190917496 | 4.078562578 | 0.00013868  | 0.00097039  |
| 221746_at   | -0.08566014 | -2.0187978  | 0.048094259 | 0.123729485 |
| 221747_at   | 0.603296683 | 10.86099701 | 1.17E-15    | 2.62E-11    |
| 221748_s_at | 0.944799097 | 10.45696435 | 5.13E-15    | 7.65E-11    |
| 221749_at   | -0.04131928 | -0.65747134 | 0.513453668 | 0.684086472 |
| 221750_at   | 0.040470116 | 0.591280236 | 0.55660801  | 0.71879118  |
| 221751_at   | -0.07031718 | -1.16929178 | 0.247023109 | 0.418751206 |
| 221752_at   | 0.034084904 | 0.813437494 | 0.419262052 | 0.601549316 |
| 221753_at   | 0.085967122 | 2.774866731 | 0.00739978  | 0.027259393 |
| 221754_s_at | 0.086426904 | 1.851866545 | 0.069087702 | 0.164124147 |
| 221755_at   | 0.12650069  | 3.118627563 | 0.002817028 | 0.012185309 |
| 221756_at   | 0.188106769 | 4.217430567 | 8.68E-05    | 0.00065417  |
| 221757_at   | 0.010027914 | 0.227532567 | 0.820802097 | 0.90043317  |
| 221758_at   | -0.08555042 | -1.31782948 | 0.192692425 | 0.352278894 |
| 221759_at   | 0.066741983 | 1.518971549 | 0.134149981 | 0.271340835 |
| 221760_at   | -0.80243144 | -6.10818476 | 8.75E-08    | 2.27E-06    |
| 221761_at   | -0.00277545 | -0.02804958 | 0.97771797  | 0.988756034 |
| 221762_s_at | 0.04934526  | 1.406625008 | 0.164822937 | 0.315228804 |
| 221763_at   | 0.08042093  | 1.303295073 | 0.197574538 | 0.358575227 |
| 221764_at   | -0.18387534 | -4.53371909 | 2.92E-05    | 0.000261903 |
| 221765_at   | -0.03602866 | -1.23773027 | 0.220755268 | 0.387659675 |
| 221766_s_at | 0.241991832 | 5.281250327 | 1.97E-06    | 2.80E-05    |
| 221767_x_at | -0.03492672 | -0.84787542 | 0.399959263 | 0.582379676 |
| 221768_at   | 0.195980971 | 2.672044693 | 0.009748304 | 0.034189062 |
| 221769_at   | 0.102234697 | 2.872106322 | 0.0056692   | 0.021843943 |
| 221770_at   | -0.2376565  | -6.02274336 | 1.21E-07    | 2.94E-06    |
| 221771_s_at | 0.034309022 | 0.452889848 | 0.652301432 | 0.789241103 |
| 221772_s_at | -0.11918287 | -3.530736   | 0.000814715 | 0.004295803 |
| 221773_at   | 0.325820151 | 3.2417728   | 0.001962054 | 0.008965149 |
| 221774_x_at | 0.104224091 | 2.686780019 | 0.009374367 | 0.033129781 |
| 221775_x_at | 0.057285329 | 1.151254237 | 0.254306094 | 0.427497478 |
| 221776_s_at | 0.199584975 | 2.731818073 | 0.008311335 | 0.030023454 |
| 221777_at   | -0.15331517 | -4.16849198 | 0.0001025   | 0.000753073 |
| 221778_at   | -0.00514565 | -0.11058287 | 0.912325216 | 0.953657784 |
| 221779_at   | 0.051551778 | 1.441348704 | 0.154811944 | 0.301029212 |
| 221780_s_at | 0.047966098 | 1.013098078 | 0.315180562 | 0.496459651 |
| 221781_s_at | 0.040417782 | 0.553910118 | 0.581749165 | 0.737784724 |
| 221782_at   | 0.086470809 | 1.34493772  | 0.183830621 | 0.340987719 |
| 221783_at   | -0.11343076 | -2.19133727 | 0.032417803 | 0.090618993 |
| 221784_at   | -0.05568986 | -1.20317118 | 0.23375128  | 0.402535321 |
| 221785_at   | -0.09243307 | -1.93487626 | 0.057839777 | 0.142895263 |
| 221786_at   | -0.13131945 | -1.40541363 | 0.165181008 | 0.31575148  |
| 221787_at   | -0.15342233 | -3.10717358 | 0.00291222  | 0.012515909 |
| 221788_at   | 0.060330129 | 1.342465122 | 0.184625868 | 0.341991094 |
| 221789_x_at | -0.02469698 | -0.75412308 | 0.453796799 | 0.633076405 |

|             |             |             |             |             |
|-------------|-------------|-------------|-------------|-------------|
| 221790_s_at | 0.209342918 | 3.127895935 | 0.002742141 | 0.011909795 |
| 221791_s_at | -0.06434906 | -1.43228959 | 0.157376911 | 0.304651489 |
| 221792_at   | -0.43182507 | -5.96251059 | 1.53E-07    | 3.50E-06    |
| 221793_at   | 0.018730279 | 0.539719175 | 0.591436984 | 0.745251769 |
| 221794_at   | 0.133990241 | 3.093063957 | 0.003033622 | 0.012966587 |
| 221795_at   | 0.468490654 | 5.440147603 | 1.09E-06    | 1.72E-05    |
| 221796_at   | 0.50779466  | 5.048071544 | 4.64E-06    | 5.67E-05    |
| 221797_at   | 0.017356098 | 0.503718729 | 0.616348595 | 0.764058898 |
| 221798_x_at | -0.06259997 | -1.71089144 | 0.092393548 | 0.205033127 |
| 221799_at   | 0.09546428  | 2.470001959 | 0.01644467  | 0.052458615 |
| 221800_s_at | 0.115288798 | 2.589238025 | 0.012115075 | 0.040802332 |
| 221801_x_at | -0.51850746 | -5.92577484 | 1.75E-07    | 3.90E-06    |
| 221802_s_at | 0.509033421 | 5.236127712 | 2.33E-06    | 3.21E-05    |
| 221803_s_at | -0.04345701 | -1.15276253 | 0.253691282 | 0.426720766 |
| 221804_s_at | 0.002791171 | 0.068051443 | 0.945976486 | 0.972144246 |
| 221805_at   | -1.90952321 | -6.77756823 | 6.64E-09    | 3.37E-07    |
| 221806_s_at | 0.215272634 | 4.906191747 | 7.75E-06    | 8.65E-05    |
| 221807_s_at | 0.03319567  | 0.922387781 | 0.360110733 | 0.543278048 |
| 221808_at   | 0.027350858 | 0.400382546 | 0.690331555 | 0.815650488 |
| 221809_at   | 0.027326623 | 0.979863635 | 0.331183891 | 0.513718953 |
| 221810_at   | -0.47624374 | -8.36782782 | 1.38E-11    | 6.37E-09    |
| 221811_at   | 0.016564101 | 0.403802075 | 0.687828939 | 0.813928483 |
| 221812_at   | 0.046706409 | 1.19428688  | 0.237180402 | 0.40655339  |
| 221813_at   | 0.028822495 | 0.597676012 | 0.552360224 | 0.714813468 |
| 221814_at   | 0.060160955 | 0.888759351 | 0.377768307 | 0.560308681 |
| 221815_at   | -0.04373241 | -0.81279938 | 0.419624947 | 0.60179951  |
| 221816_s_at | 0.43994419  | 5.670484928 | 4.61E-07    | 8.48E-06    |
| 221817_at   | -0.00117148 | -0.03345173 | 0.973428109 | 0.986540185 |
| 221818_at   | -0.01109033 | -0.39550631 | 0.693906289 | 0.818506805 |
| 221819_at   | 0.080916654 | 2.758198033 | 0.00774124  | 0.028295699 |
| 221820_s_at | 0.047095161 | 1.216881902 | 0.228530246 | 0.396046753 |
| 221821_s_at | 0.146856599 | 3.380837186 | 0.001291951 | 0.006318655 |
| 221822_at   | 0.139000568 | 3.080636145 | 0.003144459 | 0.013361109 |
| 221823_at   | 0.02390324  | 0.436969407 | 0.663740495 | 0.797052159 |
| 221824_s_at | 0.523079508 | 7.831919242 | 1.10E-10    | 2.22E-08    |
| 221825_at   | -0.29225684 | -4.56437909 | 2.62E-05    | 0.000239712 |
| 221826_at   | -0.04651352 | -1.01100088 | 0.316174757 | 0.49737706  |
| 221827_at   | 0.104787122 | 2.235622116 | 0.029202106 | 0.083323791 |
| 221828_s_at | 0.200470069 | 3.056503191 | 0.00337058  | 0.014175023 |
| 221829_s_at | 0.597233053 | 6.429482243 | 2.55E-08    | 8.79E-07    |
| 221830_at   | -0.08946283 | -1.76955744 | 0.082006786 | 0.187062771 |
| 221831_at   | -0.14269343 | -3.91022812 | 0.000242173 | 0.001552605 |
| 221832_s_at | -0.14363362 | -3.08316401 | 0.003121612 | 0.013280445 |
| 221833_at   | 0.13191996  | 1.484540178 | 0.1430283   | 0.284322496 |
| 221834_at   | 0.026612399 | 0.409612932 | 0.683584253 | 0.810859342 |
| 221835_at   | -0.13652441 | -3.79955369 | 0.000347209 | 0.002102639 |
| 221836_s_at | -0.04883598 | -1.17879508 | 0.243246807 | 0.414061561 |
| 221837_at   | -0.18831314 | -4.45775723 | 3.80E-05    | 0.000328536 |
| 221838_at   | -0.08875662 | -1.79102413 | 0.078457287 | 0.180836156 |
| 221839_s_at | 0.076537567 | 2.411891931 | 0.019023458 | 0.05919351  |
| 221840_at   | -0.1196213  | -1.5448622  | 0.127766395 | 0.261764726 |
| 221841_s_at | 0.486613646 | 2.736632038 | 0.008204509 | 0.02970441  |
| 221842_s_at | 0.063673104 | 1.450675262 | 0.1522054   | 0.297293114 |
| 221843_s_at | 0.051082063 | 1.381696747 | 0.172313013 | 0.325569172 |
| 221844_x_at | -0.05755908 | -1.21158469 | 0.230537234 | 0.398683205 |
| 221845_s_at | 0.026139549 | 0.698222358 | 0.487801307 | 0.662115532 |
| 221846_s_at | 0.125972336 | 3.636545269 | 0.000584641 | 0.003268957 |
| 221847_at   | -0.35573509 | -5.45748733 | 1.02E-06    | 1.63E-05    |
| 221848_at   | -0.1178025  | -2.90358334 | 0.005194723 | 0.02032769  |
| 221849_s_at | 0.094263609 | 2.660521819 | 0.010050165 | 0.035041503 |
| 221850_x_at | 0.017401518 | 0.553475519 | 0.582044724 | 0.737975723 |
| 221851_at   | -0.02728943 | -0.73927242 | 0.46269441  | 0.640605284 |
| 221852_at   | 0.044012723 | 1.122086675 | 0.266404955 | 0.441672673 |
| 221853_s_at | -0.4836997  | -5.74602731 | 3.47E-07    | 6.74E-06    |
| 221854_at   | -0.07015692 | -1.71974738 | 0.09075939  | 0.202174084 |
| 221855_at   | -0.09181534 | -2.84083156 | 0.006180062 | 0.02348434  |
| 221856_s_at | 0.249910513 | 6.267063847 | 4.76E-08    | 1.41E-06    |
| 221857_s_at | 0.149985404 | 2.730853588 | 0.00833289  | 0.03007701  |
| 221858_at   | 0.107860539 | 1.22880995  | 0.224057782 | 0.3912049   |
| 221859_at   | -0.01075033 | -0.25167044 | 0.802176836 | 0.888415981 |
| 221860_at   | 0.25034742  | 3.80479713  | 0.000341373 | 0.00207263  |
| 221861_at   | -0.2649612  | -4.74288976 | 1.39E-05    | 0.000140636 |
| 221862_at   | 0.056541175 | 1.19882017  | 0.235426132 | 0.404430532 |
| 221863_at   | -0.08149299 | -1.41549002 | 0.162220765 | 0.311411147 |
| 221864_at   | 0.18991945  | 4.545819082 | 2.79E-05    | 0.000252809 |

|             |             |             |             |             |
|-------------|-------------|-------------|-------------|-------------|
| 221865_at   | -0.59282345 | -6.7016713  | 8.91E-09    | 4.12E-07    |
| 221866_at   | 0.169873027 | 4.202378608 | 9.14E-05    | 0.000683153 |
| 221867_at   | 0.077405106 | 1.800033339 | 0.077006301 | 0.178227117 |
| 221868_at   | 0.543170106 | 5.459035897 | 1.02E-06    | 1.62E-05    |
| 221869_at   | -0.10831219 | -3.71028926 | 0.000462532 | 0.002682751 |
| 221870_at   | 0.1411625   | 3.111639686 | 0.00287475  | 0.012381217 |
| 221871_s_at | -0.0535267  | -1.36979985 | 0.175978452 | 0.330566114 |
| 221872_at   | 0.006755307 | 0.215250781 | 0.830319637 | 0.906017022 |
| 221873_at   | 0.18751635  | 3.753235562 | 0.000403094 | 0.002387437 |
| 221874_at   | -0.38744162 | -4.90509023 | 7.78E-06    | 8.67E-05    |
| 221875_x_at | 0.142621944 | 1.796197264 | 0.077621359 | 0.179353416 |
| 221876_at   | 0.038136673 | 1.068927581 | 0.289488322 | 0.467727562 |
| 221877_at   | 0.032800268 | 0.85076005  | 0.398367647 | 0.580686461 |
| 221878_at   | 0.115156306 | 2.815594371 | 0.006622944 | 0.02486497  |
| 221879_at   | 0.237589849 | 4.595149084 | 2.35E-05    | 0.000218507 |
| 221880_s_at | -0.00850383 | -0.24581596 | 0.806684135 | 0.891227565 |
| 221881_s_at | -0.03860283 | -0.6365256  | 0.526913972 | 0.694984041 |
| 221882_s_at | -0.17195312 | -3.61545958 | 0.000624866 | 0.003455397 |
| 221883_at   | 0.020265007 | 0.547128411 | 0.586369384 | 0.741414035 |
| 221884_at   | 0.27774378  | 3.593792017 | 0.000668945 | 0.003655721 |
| 221885_at   | 0.22312958  | 4.550752331 | 2.75E-05    | 0.00024923  |
| 221886_at   | 0.125881811 | 3.424498518 | 0.001130859 | 0.005640662 |
| 221887_s_at | 0.121584445 | 2.772194573 | 0.00745357  | 0.027421382 |
| 221888_at   | 0.136283723 | 3.055717672 | 0.00337819  | 0.014200383 |
| 221889_at   | -0.27460301 | -4.40143915 | 4.62E-05    | 0.000385404 |
| 221890_at   | -0.0602263  | -1.81018843 | 0.075397728 | 0.175357787 |
| 221891_x_at | -0.10072537 | -1.04021231 | 0.302516617 | 0.482121867 |
| 221892_at   | 0.039893372 | 1.107699129 | 0.272520385 | 0.44851707  |
| 221893_s_at | -0.16120853 | -2.60399655 | 0.011658294 | 0.039532053 |
| 221894_at   | -0.01557949 | -0.44522379 | 0.657799349 | 0.792985807 |
| 221895_at   | -0.05264857 | -1.03262871 | 0.306023136 | 0.486078882 |
| 221896_s_at | -0.1891962  | -2.56827116 | 0.012792    | 0.042641765 |
| 221897_at   | 0.102385301 | 2.247212833 | 0.028408375 | 0.081532694 |
| 221898_at   | 0.257317062 | 3.030401457 | 0.00363219  | 0.01509764  |
| 221899_at   | 0.49159407  | 6.168960854 | 6.94E-08    | 1.90E-06    |
| 221900_at   | 0.114109297 | 2.199789826 | 0.031781013 | 0.089190393 |
| 221901_at   | -0.11430033 | -1.97327653 | 0.053188982 | 0.133869573 |
| 221902_at   | -0.04643355 | -1.02820755 | 0.308080105 | 0.488494858 |
| 221903_s_at | -0.20722062 | -2.43377899 | 0.018012355 | 0.056634879 |
| 221904_at   | -0.40398904 | -4.98836667 | 5.76E-06    | 6.75E-05    |
| 221905_at   | -0.11147309 | -2.05127561 | 0.044721572 | 0.116944387 |
| 221906_at   | 0.127830997 | 3.517863401 | 0.000847978 | 0.004440283 |
| 221907_at   | 0.014682187 | 0.455945489 | 0.650115366 | 0.788037861 |
| 221908_at   | -0.44234776 | -7.02623356 | 2.53E-09    | 1.71E-07    |
| 221909_at   | -0.44657091 | -6.31194899 | 4.01E-08    | 1.25E-06    |
| 221910_at   | -0.16934679 | -3.68856233 | 0.000495711 | 0.002844674 |
| 221911_at   | -0.52739292 | -4.47114163 | 3.63E-05    | 0.000315291 |
| 221912_s_at | -0.03957205 | -0.80700535 | 0.422928677 | 0.604800566 |
| 221913_at   | -0.00927211 | -0.27714025 | 0.782648275 | 0.875774135 |
| 221914_at   | -0.71109314 | -6.52120444 | 1.79E-08    | 6.81E-07    |
| 221915_s_at | -0.03606575 | -0.85907909 | 0.393799524 | 0.57644389  |
| 221916_at   | -1.13661261 | -6.31253919 | 4.00E-08    | 1.24E-06    |
| 221917_s_at | 0.001734988 | 0.035461577 | 0.971832274 | 0.985727566 |
| 221918_at   | -0.3330331  | -4.49886918 | 3.29E-05    | 0.000290015 |
| 221919_at   | 0.145881783 | 2.68097919  | 0.00951998  | 0.033522449 |
| 221920_s_at | -0.10210743 | -1.71376404 | 0.09186084  | 0.204129109 |
| 221921_s_at | -0.18643872 | -4.54612951 | 2.79E-05    | 0.000252585 |
| 221922_at   | 0.220988384 | 2.620939479 | 0.011153263 | 0.038099948 |
| 221923_s_at | -0.10601739 | -2.39196975 | 0.019987731 | 0.061546556 |
| 221924_at   | -0.0645088  | -1.57866863 | 0.119798552 | 0.249175636 |
| 221925_s_at | 0.099983754 | 2.180899004 | 0.033219643 | 0.092395668 |
| 221926_s_at | 0.086668529 | 2.134436297 | 0.0370036   | 0.100546791 |
| 221927_s_at | 0.069917286 | 1.469265002 | 0.147112376 | 0.29013487  |
| 221928_at   | 0.412195075 | 6.438124628 | 2.47E-08    | 8.57E-07    |
| 221929_at   | -0.0792764  | -1.63529843 | 0.107350456 | 0.229731209 |
| 221930_at   | -0.03025007 | -0.85882775 | 0.393937056 | 0.576614106 |
| 221931_s_at | -0.44465958 | -3.93098332 | 0.000226224 | 0.001465277 |
| 221932_s_at | -0.22723983 | -6.65324903 | 1.07E-08    | 4.72E-07    |
| 221933_at   | -0.53419308 | -5.69904961 | 4.14E-07    | 7.77E-06    |
| 221934_s_at | 0.011758059 | 0.203684873 | 0.839305853 | 0.911350062 |
| 221935_s_at | 0.145764412 | 3.336566978 | 0.001477315 | 0.007078819 |
| 221936_x_at | -0.03362593 | -0.88949801 | 0.377374667 | 0.560012102 |
| 221937_at   | 0.100140427 | 3.002614794 | 0.003931419 | 0.016164028 |
| 221938_x_at | 0.078970791 | 1.990663389 | 0.051190893 | 0.129849786 |
| 221939_at   | 0.109857394 | 3.366115679 | 0.001351001 | 0.006560075 |

|             |             |             |             |             |
|-------------|-------------|-------------|-------------|-------------|
| 221940_at   | -0.01212141 | -0.42409804 | 0.67304805  | 0.803353062 |
| 221941_at   | 0.052930408 | 1.155768635 | 0.2524691   | 0.425433566 |
| 221942_s_at | -0.78278271 | -8.38405175 | 1.30E-11    | 6.24E-09    |
| 221943_x_at | 0.02631317  | 0.518323749 | 0.606185192 | 0.756031383 |
| 221944_at   | -0.0432538  | -0.73819496 | 0.463343824 | 0.641285875 |
| 221945_at   | -0.45692086 | -6.79732421 | 6.15E-09    | 3.19E-07    |
| 221946_at   | 0.087515651 | 1.66109833  | 0.102038457 | 0.221062713 |
| 221947_at   | 0.017298461 | 0.308352052 | 0.758908571 | 0.861212753 |
| 221948_s_at | 0.00025488  | 0.005490892 | 0.995637585 | 0.997917707 |
| 221949_at   | 0.03018528  | 0.832580745 | 0.408463546 | 0.590644605 |
| 221950_at   | 0.605769018 | 4.44996327  | 3.91E-05    | 0.00033578  |
| 221951_at   | 0.051266223 | 1.134577862 | 0.261174667 | 0.435521743 |
| 221952_x_at | 0.047486342 | 0.643600954 | 0.522346574 | 0.691223709 |
| 221953_s_at | -0.05910366 | -0.95692871 | 0.342536827 | 0.525492787 |
| 221954_at   | 0.02650731  | 0.767867432 | 0.445650934 | 0.625770753 |
| 221955_at   | -0.00613629 | -0.19732795 | 0.84425416  | 0.914390436 |
| 221956_at   | -0.11570899 | -1.87023764 | 0.066450971 | 0.159299835 |
| 221957_at   | -0.1600932  | -2.85605278 | 0.005926339 | 0.022668602 |
| 221958_s_at | 0.643153568 | 5.798966634 | 2.84E-07    | 5.71E-06    |
| 221959_at   | -0.323563   | -8.8441987  | 2.21E-12    | 3.09E-09    |
| 221960_s_at | -0.13707298 | -3.09280324 | 0.003035909 | 0.012973882 |
| 221961_at   | 0.027269598 | 0.585877207 | 0.560209141 | 0.721669125 |
| 221962_s_at | -0.14786176 | -2.78483295 | 0.007202296 | 0.026659351 |
| 221963_x_at | 0.012609564 | 0.438710242 | 0.662485696 | 0.796229951 |
| 221964_at   | 0.20941245  | 4.933218574 | 7.03E-06    | 8.01E-05    |
| 221965_at   | -0.09054994 | -2.54258027 | 0.013668157 | 0.045008525 |
| 221966_at   | -0.05520925 | -1.57547119 | 0.120534648 | 0.250380408 |
| 221967_at   | -0.04935493 | -1.24798246 | 0.217004048 | 0.383149657 |
| 221968_s_at | -0.04342045 | -0.74979301 | 0.45638084  | 0.635328074 |
| 221969_at   | 0.044751627 | 1.389964506 | 0.169800412 | 0.322101868 |
| 221970_s_at | 0.185175442 | 3.719563182 | 0.000449027 | 0.00261505  |
| 221971_x_at | 0.034790637 | 1.09703911  | 0.277114527 | 0.453722247 |
| 221972_s_at | 0.150302607 | 1.620597056 | 0.110476494 | 0.234653998 |
| 221973_at   | -0.72988554 | -8.74770778 | 3.20E-12    | 3.45E-09    |
| 221974_at   | 0.599044975 | 6.485110075 | 2.06E-08    | 7.54E-07    |
| 221975_s_at | 0.027022152 | 0.74816332  | 0.457355581 | 0.63612775  |
| 221976_s_at | 0.011759734 | 0.519374326 | 0.605457084 | 0.755468788 |
| 221977_at   | -0.00573442 | -0.25281203 | 0.801298716 | 0.887811246 |
| 221978_at   | 0.034403379 | 0.811391378 | 0.42042635  | 0.602446196 |
| 221979_at   | -0.11828739 | -2.50493731 | 0.015050281 | 0.048750151 |
| 221980_at   | 0.017102976 | 0.420254776 | 0.675837269 | 0.805260584 |
| 221981_s_at | 0.000203831 | 0.005272764 | 0.995810882 | 0.997954523 |
| 221982_x_at | 0.009207379 | 0.194040178 | 0.846815891 | 0.915775411 |
| 221983_at   | -0.12535373 | -2.52895616 | 0.014154532 | 0.046279657 |
| 221984_s_at | -0.15629    | -2.14185035 | 0.036375626 | 0.099242994 |
| 221985_at   | 0.354977346 | 4.377561396 | 5.02E-05    | 0.000413004 |
| 221986_s_at | 0.155360034 | 2.434850412 | 0.017964122 | 0.056503099 |
| 221987_s_at | -0.00278925 | -0.11840145 | 0.906154745 | 0.950230364 |
| 221988_at   | -0.19214089 | -3.64854177 | 0.000562872 | 0.003165852 |
| 221989_at   | 0.272102696 | 2.965518952 | 0.004366756 | 0.017639105 |
| 221990_at   | 4.09E-05    | 0.001138631 | 0.999095373 | 0.999548259 |
| 221991_at   | 0.044226302 | 0.89065168  | 0.376760377 | 0.55950074  |
| 221992_at   | 0.033463458 | 0.65571998  | 0.514572064 | 0.685033353 |
| 221993_s_at | -0.03413194 | -0.94059428 | 0.350776312 | 0.533954187 |
| 221994_at   | 0.039433205 | 2.014254926 | 0.048583073 | 0.124678421 |
| 221995_s_at | 0.027549237 | 1.133258591 | 0.261723606 | 0.436152806 |
| 221996_s_at | -0.0201342  | -0.64606942 | 0.520758013 | 0.689687582 |
| 221997_s_at | 0.076087125 | 1.831262525 | 0.072149246 | 0.169567423 |
| 221998_s_at | 0.015621309 | 0.310752085 | 0.757092396 | 0.860353269 |
| 221999_at   | -4.12E-05   | -0.00107531 | 0.999145684 | 0.999548259 |
| 222000_at   | 0.13879088  | 2.647256084 | 0.010408241 | 0.036020219 |
| 222001_x_at | 0.301644434 | 5.727130659 | 3.72E-07    | 7.13E-06    |
| 222002_at   | -0.04634507 | -1.49546742 | 0.140161866 | 0.280273562 |
| 222003_s_at | 0.076188645 | 1.922738349 | 0.059380174 | 0.145806204 |
| 222004_s_at | -0.02232442 | -0.54390479 | 0.588571666 | 0.743189379 |
| 222005_s_at | -0.5896527  | -6.34242049 | 3.56E-08    | 1.14E-06    |
| 222006_at   | 0.058394766 | 1.05619356  | 0.295217238 | 0.474077935 |
| 222007_s_at | 0.010637934 | 0.331959792 | 0.741104728 | 0.849790961 |
| 222008_at   | -0.02785571 | -0.64278707 | 0.5228709   | 0.691651757 |
| 222009_at   | -0.01822414 | -0.36206705 | 0.7186051   | 0.835307406 |
| 222010_at   | -0.19686404 | -3.46252852 | 0.001006241 | 0.005120805 |
| 222011_s_at | -0.18380487 | -3.01087509 | 0.003840149 | 0.01584855  |
| 222012_at   | -0.00646156 | -0.11936864 | 0.905391826 | 0.949898387 |
| 222013_x_at | -0.03229798 | -0.93595079 | 0.353141944 | 0.53627658  |
| 222014_x_at | 0.037836065 | 0.871913314 | 0.386816145 | 0.569531164 |

|             |             |             |             |             |
|-------------|-------------|-------------|-------------|-------------|
| 222015_at   | 0.035085601 | 0.921319617 | 0.360663303 | 0.543799614 |
| 222016_s_at | -0.02527019 | -0.38997674 | 0.697968437 | 0.821203392 |
| 222017_x_at | 0.001924818 | 0.053934755 | 0.957170707 | 0.978070587 |
| 222018_at   | 0.171380671 | 3.2462099   | 0.001936364 | 0.008870435 |
| 222019_at   | -0.00967356 | -0.28753125 | 0.774720549 | 0.871045119 |
| 222020_s_at | 0.046201506 | 0.685405961 | 0.495791874 | 0.66887827  |
| 222021_x_at | 0.017195106 | 0.708135161 | 0.481670236 | 0.656925942 |
| 222022_at   | 0.00353943  | 0.086010218 | 0.93175167  | 0.964556788 |
| 222023_at   | 0.000108326 | 0.002814527 | 0.9977639   | 0.998903793 |
| 222024_s_at | 0.179096575 | 2.373719406 | 0.020909246 | 0.063847775 |
| 222025_s_at | 0.088363768 | 2.083342921 | 0.041594251 | 0.110269918 |
| 222026_at   | 0.185529084 | 3.015524164 | 0.003789653 | 0.015671986 |
| 222027_at   | 0.108107278 | 2.037447101 | 0.046131755 | 0.119825665 |
| 222028_at   | 0.047795745 | 1.296010742 | 0.200056009 | 0.361862682 |
| 222029_x_at | 0.040699199 | 0.754998592 | 0.453275354 | 0.632581256 |
| 222030_at   | -0.00909569 | -0.18210818 | 0.856126694 | 0.921265872 |
| 222031_at   | -0.11025431 | -3.23118253 | 0.002024673 | 0.009204222 |
| 222032_s_at | -0.01835588 | -0.61782437 | 0.539086203 | 0.705025622 |
| 222033_s_at | 0.171611341 | 2.027213576 | 0.047199912 | 0.121912875 |
| 222034_at   | 0.100042154 | 1.914221628 | 0.060481741 | 0.148006897 |
| 222035_s_at | 0.069472308 | 0.634113025 | 0.528476145 | 0.696055165 |
| 222036_s_at | -0.05574113 | -1.20683716 | 0.232346854 | 0.400835544 |
| 222037_at   | -0.09919644 | -3.24980071 | 0.001915806 | 0.008792481 |
| 222038_s_at | -0.10046848 | -2.23668755 | 0.029128337 | 0.083171712 |
| 222039_at   | -0.00661898 | -0.24390461 | 0.808157092 | 0.892224914 |
| 222040_at   | 0.099657025 | 2.873409408 | 0.005648787 | 0.021785952 |
| 222041_at   | 0.007653109 | 0.214702309 | 0.830745272 | 0.906260196 |
| 222042_x_at | -0.0672051  | -1.43398348 | 0.156894813 | 0.303876185 |
| 222043_at   | 0.621996933 | 5.579567828 | 6.49E-07    | 1.11E-05    |
| 222044_at   | 0.014132845 | 0.246101028 | 0.806464508 | 0.891049947 |
| 222045_s_at | -0.08174905 | -1.85516065 | 0.068608526 | 0.163237448 |
| 222046_at   | -0.04144158 | -1.12823833 | 0.263819976 | 0.438672608 |
| 222047_s_at | 0.057524368 | 0.908520204 | 0.367326947 | 0.550540793 |
| 222048_at   | 0.012025363 | 0.34652074  | 0.730193324 | 0.84270245  |
| 222049_s_at | -0.00111653 | -0.04197561 | 0.966660919 | 0.983103056 |
| 222050_at   | -0.02224022 | -0.34438838 | 0.731787797 | 0.843495741 |
| 222051_s_at | -0.00876306 | -0.22547304 | 0.822396241 | 0.901310302 |
| 222052_at   | 0.25400129  | 6.161269466 | 7.14E-08    | 1.94E-06    |
| 222053_at   | -0.03513585 | -1.01084116 | 0.316250559 | 0.497461626 |
| 222054_at   | 0.034439446 | 0.812299136 | 0.419909569 | 0.602111091 |
| 222055_at   | 0.043437136 | 1.254144877 | 0.214772004 | 0.380473696 |
| 222056_s_at | 0.201626715 | 3.78769547  | 0.000360764 | 0.002170013 |
| 222057_at   | 0.045339891 | 1.366561718 | 0.176986378 | 0.33195716  |
| 222058_at   | 0.235683005 | 4.187303375 | 9.62E-05    | 0.000712869 |
| 222059_at   | -0.02801644 | -0.48151465 | 0.631945125 | 0.775371078 |
| 222060_at   | 0.145870426 | 3.208678835 | 0.002164033 | 0.009739674 |
| 222061_at   | 0.071875471 | 2.473206072 | 0.016312097 | 0.052102648 |
| 222062_at   | 0.113318322 | 2.908201384 | 0.005128291 | 0.020118818 |
| 222063_s_at | -0.05507955 | -1.15615456 | 0.2523125   | 0.425265886 |
| 222064_s_at | -0.2559563  | -5.9046282  | 1.90E-07    | 4.16E-06    |
| 222065_s_at | 0.17142369  | 2.813028194 | 0.00666958  | 0.025002252 |
| 222066_at   | -0.08947386 | -2.22968375 | 0.029616299 | 0.084247447 |
| 222067_x_at | 0.131324847 | 1.568561823 | 0.122137678 | 0.252946113 |
| 222068_s_at | 0.331572345 | 3.004763921 | 0.00390748  | 0.016080397 |
| 222069_s_at | -0.00866509 | -0.31712558 | 0.752276084 | 0.857347949 |
| 222070_at   | 0.024929452 | 0.676433092 | 0.501428515 | 0.673716839 |
| 222071_s_at | -0.01404992 | -0.85807724 | 0.394347926 | 0.577011034 |
| 222072_at   | 0.00387669  | 0.090161849 | 0.928466248 | 0.962658266 |
| 222073_at   | 0.255549903 | 4.261959203 | 7.46E-05    | 0.000576843 |
| 222074_at   | 0.025003146 | 0.762460565 | 0.448845182 | 0.628317631 |
| 222075_s_at | -0.04662098 | -1.56677078 | 0.122555994 | 0.253624397 |
| 222076_at   | -0.01874989 | -0.5705371  | 0.570496051 | 0.729016113 |
| 222077_s_at | -0.21438334 | -2.83589315 | 0.006264512 | 0.023742671 |
| 222078_at   | 0.017673257 | 0.459836545 | 0.647336096 | 0.7860761   |
| 222079_at   | -0.01911332 | -0.72632413 | 0.470533041 | 0.647087903 |
| 222080_s_at | -0.06495111 | -1.39881407 | 0.167142317 | 0.31860123  |
| 222081_at   | -0.0105171  | -0.30157722 | 0.76404262  | 0.864339411 |
| 222082_at   | 0.001007215 | 0.027613633 | 0.978064188 | 0.988817009 |
| 222083_at   | 0.006343706 | 0.131604131 | 0.895748482 | 0.94414182  |
| 222084_s_at | 0.030475432 | 0.935099187 | 0.353576913 | 0.536681816 |
| 222085_at   | 0.033530566 | 1.242520888 | 0.218996511 | 0.385746995 |
| 222086_s_at | 0.047722031 | 1.42596804  | 0.159186257 | 0.307196001 |
| 222087_at   | 0.010726205 | 0.243926606 | 0.808140139 | 0.892224914 |
| 222088_s_at | -0.25506922 | -3.72178509 | 0.000445847 | 0.002598567 |
| 222089_s_at | 0.066536226 | 1.660820488 | 0.102094498 | 0.221130528 |

|             |             |             |             |             |
|-------------|-------------|-------------|-------------|-------------|
| 222090_at   | 0.013880005 | 0.243009111 | 0.808847442 | 0.892612224 |
| 222091_at   | -0.2316414  | -4.10015927 | 0.000129004 | 0.000914863 |
| 222092_at   | 0.055237225 | 1.500644443 | 0.138819747 | 0.278293196 |
| 222093_s_at | -0.16187124 | -3.78661692 | 0.000362022 | 0.002176415 |
| 222094_at   | 0.023910826 | 0.571077168 | 0.570132322 | 0.728697164 |
| 222095_s_at | -0.08992963 | -1.84871354 | 0.069548991 | 0.164965689 |
| 222096_x_at | -0.01213638 | -0.29624053 | 0.768094349 | 0.867188901 |
| 222097_at   | 0.063331566 | 2.31393783  | 0.024199385 | 0.071866498 |
| 222098_s_at | -0.04427239 | -1.1652995  | 0.248622015 | 0.420902879 |
| 222099_s_at | 0.137441662 | 3.903914588 | 0.000247236 | 0.001579524 |
| 222100_at   | -0.03427017 | -0.9521897  | 0.344914128 | 0.527799158 |
| 222101_s_at | 0.081365582 | 1.24419952  | 0.218382692 | 0.384932332 |
| 222102_at   | 0.049919562 | 1.138671482 | 0.259476543 | 0.433612237 |
| 222103_at   | 0.213467215 | 3.881740095 | 0.000265835 | 0.001677118 |
| 222104_x_at | 0.204753447 | 3.992677651 | 0.000184564 | 0.001232045 |
| 222105_s_at | 0.055741986 | 1.59489069  | 0.116119492 | 0.243563727 |
| 222106_at   | 0.00205484  | 0.0893399   | 0.929116605 | 0.963011186 |
| 222107_x_at | -0.0722828  | -1.58063824 | 0.119346922 | 0.248455964 |
| 222108_at   | 0.30892593  | 3.729028955 | 0.000435631 | 0.002548663 |
| 222109_at   | 0.093329443 | 1.875171084 | 0.065757548 | 0.15799346  |
| 222110_at   | 0.060386642 | 1.770739878 | 0.081807853 | 0.186767294 |
| 222111_at   | -0.07544304 | -1.14372859 | 0.257389594 | 0.431140352 |
| 222112_at   | 0.055658191 | 1.991400399 | 0.051107639 | 0.129675406 |
| 222113_s_at | 0.144893945 | 2.971564924 | 0.004292873 | 0.017398847 |
| 222114_x_at | 0.001263784 | 0.035080826 | 0.972134585 | 0.985862783 |
| 222115_x_at | -0.02586248 | -0.73011966 | 0.468227547 | 0.645247619 |
| 222116_s_at | -0.18630178 | -2.58317154 | 0.012307508 | 0.041310338 |
| 222117_s_at | 0.001316694 | 0.034712974 | 0.972426657 | 0.986018835 |
| 222118_at   | 0.022472335 | 0.882451262 | 0.381140542 | 0.563981495 |
| 222119_s_at | -0.01915958 | -0.25633769 | 0.798588395 | 0.885892313 |
| 222120_at   | -0.01227946 | -0.31294959 | 0.755430683 | 0.859492073 |
| 222121_at   | 0.130114675 | 2.532101328 | 0.01404088  | 0.045991545 |
| 222122_s_at | 0.190090677 | 3.671470622 | 0.000523399 | 0.002977565 |
| 222123_s_at | 0.353427694 | 3.993234907 | 0.000184224 | 0.001230325 |
| 222124_at   | 0.19191213  | 2.195443788 | 0.032107043 | 0.089958496 |
| 222125_s_at | -0.30475639 | -4.63030851 | 2.08E-05    | 0.000197381 |
| 222126_at   | 0.095489493 | 1.779233799 | 0.080390601 | 0.184455115 |
| 222127_s_at | 0.105872415 | 1.337926438 | 0.186092411 | 0.343819281 |
| 222128_at   | 0.113465686 | 3.705987752 | 0.000468927 | 0.00271292  |
| 222129_at   | -0.12783058 | -2.89179571 | 0.005367924 | 0.020892036 |
| 222130_s_at | -0.0554081  | -1.97129339 | 0.053421075 | 0.134287343 |
| 222131_x_at | -0.04942367 | -1.53411631 | 0.130385862 | 0.265801488 |
| 222132_s_at | -0.18894479 | -3.72875234 | 0.000436017 | 0.002550253 |
| 222133_s_at | 0.055331656 | 1.712657861 | 0.092065675 | 0.204492775 |
| 222134_at   | -0.43133293 | -7.18293514 | 1.38E-09    | 1.16E-07    |
| 222135_at   | 0.020376567 | 0.610459663 | 0.543919109 | 0.708449078 |
| 222136_x_at | 0.035354653 | 0.849314218 | 0.399164905 | 0.581480225 |
| 222137_at   | -0.01084367 | -0.23211099 | 0.81726097  | 0.898006451 |
| 222138_s_at | -0.05128403 | -0.92672788 | 0.357871178 | 0.540903605 |
| 222139_at   | 0.104247457 | 3.908598372 | 0.00024347  | 0.001559802 |
| 222140_s_at | 0.132036574 | 2.309603619 | 0.024454933 | 0.072451815 |
| 222141_at   | -0.01929916 | -0.72543496 | 0.471074072 | 0.647533062 |
| 222142_at   | 0.040209726 | 1.863707325 | 0.067378337 | 0.161047846 |
| 222143_s_at | 0.068569405 | 1.710822309 | 0.092406399 | 0.205044678 |
| 222144_at   | -0.0731599  | -1.85881514 | 0.06808021  | 0.162308798 |
| 222145_at   | -0.0046081  | -0.13020184 | 0.896852919 | 0.94468844  |
| 222146_s_at | 0.472317118 | 7.010461469 | 2.69E-09    | 1.78E-07    |
| 222147_s_at | -0.0323256  | -1.03574341 | 0.304579623 | 0.484571231 |
| 222148_s_at | -0.17041668 | -2.96439511 | 0.004380619 | 0.01768711  |
| 222149_x_at | -0.06684308 | -2.3416219  | 0.022622423 | 0.06802862  |
| 222150_s_at | 0.279947025 | 3.419801101 | 0.00114723  | 0.005710997 |
| 222151_s_at | 0.056987222 | 1.986092251 | 0.051709859 | 0.130947907 |
| 222152_at   | 0.115389966 | 3.160601573 | 0.002492529 | 0.010966342 |
| 222153_at   | -0.03264714 | -1.42332898 | 0.159946366 | 0.308252647 |
| 222154_s_at | 0.212737356 | 3.072395813 | 0.003220025 | 0.013636819 |
| 222155_s_at | 0.095710957 | 1.85168041  | 0.069114862 | 0.164159401 |
| 222156_x_at | -0.10068629 | -1.17936734 | 0.243020744 | 0.41377131  |
| 222157_s_at | -0.1164202  | -2.64295698 | 0.010526759 | 0.03634033  |
| 222158_s_at | -0.04158936 | -0.78202143 | 0.437352282 | 0.617865475 |
| 222159_at   | -0.08471575 | -1.60426564 | 0.11403518  | 0.240263071 |
| 222160_at   | 0.07978997  | 2.254825345 | 0.0278975   | 0.080303688 |
| 222161_at   | -0.13840301 | -3.09556168 | 0.003011792 | 0.012891773 |
| 222162_s_at | 0.394670317 | 2.77001222  | 0.007497767 | 0.02755676  |
| 222163_s_at | 0.087748154 | 1.733514007 | 0.088266483 | 0.198022471 |
| 222164_at   | 0.237436844 | 5.547473234 | 7.32E-07    | 1.24E-05    |

|             |             |             |             |             |
|-------------|-------------|-------------|-------------|-------------|
| 222165_x_at | -0.14949052 | -4.09855099 | 0.000129702 | 0.000919371 |
| 222166_at   | -0.02897886 | -0.73722008 | 0.463931854 | 0.641742004 |
| 222167_at   | 0.057562149 | 1.269061301 | 0.209439598 | 0.373917409 |
| 222168_at   | -0.00889724 | -0.41229321 | 0.681629819 | 0.809593916 |
| 222169_x_at | 0.054959878 | 1.806907035 | 0.075914399 | 0.1762476   |
| 222170_at   | -0.00028741 | -0.00708453 | 0.994371491 | 0.997361881 |
| 222171_s_at | -0.16327257 | -2.45179718 | 0.017216499 | 0.054516066 |
| 222172_at   | 0.035912962 | 1.084416926 | 0.28262395  | 0.459962478 |
| 222173_s_at | 0.125840768 | 2.45940553  | 0.016890047 | 0.053670472 |
| 222174_at   | 0.056765849 | 1.853907946 | 0.068790419 | 0.163530927 |
| 222175_s_at | -0.08641326 | -2.43533973 | 0.017942133 | 0.05644188  |
| 222176_at   | -0.03550033 | -1.10745215 | 0.272626215 | 0.448650811 |
| 222177_s_at | -0.06068128 | -1.37822075 | 0.173377862 | 0.327055689 |
| 222178_s_at | 0.034125353 | 1.298516088 | 0.19919992  | 0.360722967 |
| 222179_at   | -0.0152052  | -0.42401578 | 0.673107704 | 0.803367261 |
| 222180_at   | 0.089051077 | 4.577446393 | 2.50E-05    | 0.000230819 |
| 222181_at   | -0.01188962 | -0.45787694 | 0.648735162 | 0.786887747 |
| 222182_s_at | 0.397904896 | 5.073718438 | 4.22E-06    | 5.25E-05    |
| 222183_x_at | -0.07012954 | -1.36984579 | 0.175964186 | 0.330563163 |
| 222184_at   | -0.0441619  | -0.67067742 | 0.505062403 | 0.676869511 |
| 222185_at   | 0.057818431 | 1.228322777 | 0.224239183 | 0.391365548 |
| 222186_at   | 0.257365185 | 4.781134221 | 1.21E-05    | 0.000125361 |
| 222187_x_at | 0.065474652 | 1.836835386 | 0.071310136 | 0.168002225 |
| 222188_at   | -0.03808245 | -0.86425261 | 0.390975128 | 0.573784534 |
| 222189_at   | -0.01243459 | -0.33478305 | 0.738984832 | 0.848637921 |
| 222190_s_at | -0.16334193 | -3.54842143 | 0.000771035 | 0.00410912  |
| 222191_s_at | 0.003674992 | 0.078261971 | 0.937886447 | 0.96750215  |
| 222192_s_at | -0.18079193 | -4.19415131 | 9.40E-05    | 0.00069842  |
| 222193_at   | 0.007096309 | 0.191423556 | 0.848855871 | 0.916996171 |
| 222194_at   | -0.01702295 | -0.65377125 | 0.515818021 | 0.685936057 |
| 222195_s_at | 0.068678952 | 1.634954826 | 0.107422689 | 0.229841766 |
| 222196_at   | 0.009481683 | 0.493369742 | 0.623596394 | 0.768948516 |
| 222197_s_at | 0.060425929 | 1.059228342 | 0.293844897 | 0.472477645 |
| 222198_at   | 0.001209062 | 0.044955611 | 0.964295625 | 0.981670123 |
| 222199_s_at | 0.130230753 | 3.701576338 | 0.000475574 | 0.002746396 |
| 222200_s_at | 0.042296968 | 0.836405885 | 0.406326362 | 0.588639798 |
| 222201_s_at | 0.100031478 | 2.310191834 | 0.024420111 | 0.07239212  |
| 222202_at   | 0.01041083  | 0.542228545 | 0.589718371 | 0.744048711 |
| 222203_s_at | -0.05749248 | -0.95501085 | 0.343497618 | 0.526388545 |
| 222204_s_at | 0.006900854 | 0.108802186 | 0.913731313 | 0.954234837 |
| 222205_x_at | 0.006107377 | 0.197009981 | 0.844501839 | 0.914474412 |
| 222206_s_at | -0.00154674 | -0.05394871 | 0.95715964  | 0.978070587 |
| 222207_x_at | 0.248274003 | 5.379947996 | 1.37E-06    | 2.06E-05    |
| 222208_s_at | 0.01391711  | 0.433534227 | 0.666219421 | 0.79899848  |
| 222209_s_at | -0.07435297 | -0.83444506 | 0.407421057 | 0.589785958 |
| 222210_at   | 0.051428394 | 2.087892858 | 0.041166275 | 0.10940139  |
| 222211_x_at | -0.02036495 | -0.6415751  | 0.523652203 | 0.692291393 |
| 222212_s_at | 0.316345316 | 4.413673331 | 4.43E-05    | 0.000371642 |
| 222213_x_at | -0.00988702 | -0.34773076 | 0.729289062 | 0.842075822 |
| 222214_at   | 0.005757759 | 1.379008619 | 0.173136062 | 0.326671055 |
| 222215_at   | 0.060466291 | 2.154824655 | 0.035299091 | 0.096884477 |
| 222216_s_at | -0.25320598 | -5.02953488 | 4.96E-06    | 5.98E-05    |
| 222217_s_at | 0.289914054 | 4.995705571 | 5.61E-06    | 6.61E-05    |
| 222218_s_at | 0.112296577 | 2.382222431 | 0.020475278 | 0.062749855 |
| 222219_s_at | -0.05052229 | -1.2593873  | 0.212886585 | 0.378152912 |
| 222220_s_at | 0.067268648 | 1.346019047 | 0.183483659 | 0.340598591 |
| 222221_x_at | 0.155536157 | 3.657045196 | 0.000547912 | 0.003093532 |
| 222222_s_at | 0.221563301 | 5.04269768  | 4.73E-06    | 5.76E-05    |
| 222223_s_at | -0.01365264 | -0.3853351  | 0.701385166 | 0.823645642 |
| 222224_at   | 0.0012249   | 0.071472205 | 0.943265458 | 0.970742161 |
| 222225_at   | -0.00364555 | -0.10843656 | 0.91402006  | 0.954246988 |
| 222226_at   | -0.00636725 | -0.18973703 | 0.850171277 | 0.917783892 |
| 222227_at   | -0.02334664 | -0.99836042 | 0.322211759 | 0.504110523 |
| 222228_s_at | -0.15414632 | -2.80537845 | 0.006810403 | 0.025455426 |
| 222229_x_at | -0.11925347 | -2.83644944 | 0.006254946 | 0.023718484 |
| 222230_s_at | -0.42977456 | -4.93535942 | 6.98E-06    | 7.96E-05    |
| 222231_s_at | -0.18035896 | -3.61496404 | 0.000625843 | 0.00345994  |
| 222233_s_at | 0.08390765  | 1.826699125 | 0.072842523 | 0.170756782 |
| 222234_s_at | -0.15282091 | -3.81766851 | 0.000327442 | 0.002002468 |
| 222235_s_at | 0.006372633 | 0.12143758  | 0.903760156 | 0.948966212 |
| 222236_s_at | 0.270228092 | 4.614243892 | 2.20E-05    | 0.000206783 |
| 222237_s_at | 0.155359592 | 4.749039351 | 1.36E-05    | 0.000138    |
| 222238_s_at | 0.054041276 | 1.097449936 | 0.276936477 | 0.453497179 |
| 222239_s_at | 0.110875098 | 2.628576165 | 0.010932214 | 0.037465109 |
| 222240_s_at | 0.072535753 | 1.305329261 | 0.196885717 | 0.35777899  |



|             |             |             |             |             |
|-------------|-------------|-------------|-------------|-------------|
| 222241_at   | -0.03447173 | -0.73339729 | 0.466241806 | 0.643672452 |
| 222242_s_at | -0.02116291 | -0.51747335 | 0.606774858 | 0.756534578 |
| 222243_s_at | 0.703717041 | 7.761298945 | 1.45E-10    | 2.65E-08    |
| 222244_s_at | 0.14376695  | 3.583800819 | 0.000690255 | 0.003752903 |
| 222245_s_at | -0.07517585 | -1.68597062 | 0.097122544 | 0.212868458 |
| 222246_at   | -0.04618729 | -2.03048803 | 0.046855832 | 0.121241364 |
| 222247_at   | 0.022114237 | 0.697673747 | 0.48814188  | 0.662537563 |
| 222248_s_at | -0.01041847 | -0.25474098 | 0.799815549 | 0.886761512 |
| 222249_at   | -0.04875654 | -1.47841669 | 0.144654673 | 0.286666665 |
| 222250_s_at | -0.09433831 | -2.65942209 | 0.010079416 | 0.035121571 |
| 222251_s_at | 0.047100158 | 0.936185128 | 0.353022312 | 0.53615002  |
| 222252_x_at | 0.107935495 | 2.226362499 | 0.029850204 | 0.084788694 |
| 222253_s_at | 0.097977965 | 3.859560083 | 0.000285781 | 0.001787309 |
| 222254_at   | -0.04298895 | -1.27555884 | 0.207147816 | 0.370892599 |
| 222255_at   | -0.01567529 | -0.61294676 | 0.542284544 | 0.707159805 |
| 222256_s_at | 0.073751074 | 2.215315452 | 0.030639972 | 0.086553878 |
| 222257_s_at | -0.02966567 | -0.60324429 | 0.548675366 | 0.711920783 |
| 222258_s_at | 0.542003072 | 6.825034989 | 5.52E-09    | 2.96E-07    |
| 222259_s_at | -0.00380375 | -0.16648874 | 0.868345811 | 0.928661521 |
| 222260_at   | -0.01022706 | -0.20012872 | 0.842073215 | 0.913304837 |
| 222261_at   | 0.091610788 | 2.198413332 | 0.031883958 | 0.089417535 |
| 222262_s_at | 0.008869888 | 0.30636001  | 0.760417045 | 0.862114627 |
| 222263_at   | -0.08662412 | -2.58896847 | 0.012123567 | 0.040827855 |
| 222264_at   | -0.14460482 | -2.2704675  | 0.026873186 | 0.07796783  |
| 222265_at   | -0.04156682 | -0.77916504 | 0.439019634 | 0.619495626 |
| 222266_at   | 0.524723346 | 6.242485175 | 5.23E-08    | 1.52E-06    |
| 222267_at   | 0.000510974 | 0.012237748 | 0.990277526 | 0.995408013 |
| 222268_x_at | -0.03856021 | -0.48693495 | 0.628121913 | 0.772525305 |
| 222269_at   | -0.00231496 | -0.07806945 | 0.938038926 | 0.96750215  |
| 222270_at   | 0.04096906  | 1.153829267 | 0.2532571   | 0.426196778 |
| 222271_at   | 0.168009667 | 2.654187804 | 0.010219709 | 0.035480403 |
| 222272_x_at | 0.075575895 | 2.450590078 | 0.01726881  | 0.054666219 |
| 222273_at   | 0.024423749 | 0.48497661  | 0.629502056 | 0.773626626 |
| 222274_at   | 0.135556024 | 2.288240865 | 0.025749856 | 0.075473018 |
| 222275_at   | -0.2761249  | -4.30800265 | 6.38E-05    | 0.000503957 |
| 222276_at   | -0.05996822 | -1.42603185 | 0.159167913 | 0.30718713  |
| 222277_at   | 0.00090075  | 0.02322213  | 0.981552027 | 0.990662433 |
| 222278_at   | -0.01868797 | -0.36844836 | 0.713867437 | 0.832050999 |
| 222279_at   | 0.083252836 | 1.76147803  | 0.083376868 | 0.189420444 |
| 222280_at   | 0.052736441 | 1.844519238 | 0.070166641 | 0.165981448 |
| 222281_s_at | -0.0503403  | -1.26478279 | 0.210958946 | 0.375804257 |
| 222282_at   | 0.298087681 | 5.872426047 | 2.15E-07    | 4.56E-06    |
| 222283_at   | -0.00492664 | -0.22250281 | 0.824696626 | 0.902702464 |
| 222284_at   | 0.088849493 | 2.491816515 | 0.015560946 | 0.050129733 |
| 222285_at   | -0.01493    | -0.39469262 | 0.694503481 | 0.818877943 |
| 222286_at   | -0.0152373  | -0.41177382 | 0.68200838  | 0.809871361 |
| 222287_at   | 0.002977918 | 0.142202493 | 0.887408132 | 0.939499792 |
| 222288_at   | 0.320174469 | 4.294279802 | 6.68E-05    | 0.000524529 |
| 222289_at   | -0.06783774 | -1.73483362 | 0.088030525 | 0.197691583 |
| 222290_at   | 0.073850054 | 2.881458938 | 0.005524192 | 0.02138292  |
| 222291_at   | 0.033955017 | 0.464735096 | 0.643844363 | 0.783624517 |
| 222292_at   | 0.045184379 | 1.63259528  | 0.107919788 | 0.230648308 |
| 222293_at   | 0.042813451 | 0.718177642 | 0.475503061 | 0.651416166 |
| 222294_s_at | 0.140279273 | 4.070498142 | 0.000142469 | 0.000992401 |
| 222295_x_at | -0.005067   | -0.16852278 | 0.866752676 | 0.927869789 |
| 222296_at   | -0.00438348 | -0.12307264 | 0.902470956 | 0.948191738 |
| 222297_x_at | 0.086897316 | 2.318344432 | 0.023942006 | 0.071251077 |
| 222298_at   | -0.03728078 | -0.72832909 | 0.469314379 | 0.646083291 |
| 222299_x_at | -0.01657107 | -0.77414989 | 0.441956148 | 0.622283613 |
| 222300_at   | -0.06523099 | -2.23602456 | 0.029174223 | 0.083267506 |
| 222301_at   | 0.038416963 | 0.671010021 | 0.504852025 | 0.676752041 |
| 222302_at   | -0.00207194 | -0.04957988 | 0.960625881 | 0.980010315 |
| 222303_at   | 0.394054065 | 4.129867076 | 0.000116755 | 0.000840123 |
| 222304_x_at | 0.058980919 | 1.498725512 | 0.139316031 | 0.278969133 |
| 222305_at   | -0.0161172  | -0.48651632 | 0.628416836 | 0.772760434 |
| 222306_at   | 0.032054197 | 0.844871617 | 0.401620792 | 0.583942886 |
| 222307_at   | -0.00174206 | -0.04627908 | 0.963245257 | 0.981159564 |
| 222308_x_at | 0.000215883 | 0.012097179 | 0.990389198 | 0.995422886 |
| 222309_at   | 0.030696444 | 1.012204094 | 0.315604105 | 0.496881624 |
| 222310_at   | 0.153197966 | 3.297010323 | 0.001663949 | 0.00781065  |
| 222311_s_at | 0.166426731 | 4.091981717 | 0.000132589 | 0.000935088 |
| 222312_s_at | 0.032168432 | 1.220259662 | 0.227257174 | 0.394813513 |
| 222313_at   | 0.257266048 | 4.445122223 | 3.97E-05    | 0.00034039  |
| 222314_x_at | -0.05236786 | -1.03803869 | 0.303518847 | 0.483320186 |
| 222315_at   | 0.198038303 | 2.32760324  | 0.023409142 | 0.069994069 |

|             |             |             |             |             |
|-------------|-------------|-------------|-------------|-------------|
| 222316_at   | 0.24598858  | 4.257242085 | 7.58E-05    | 0.000584784 |
| 222317_at   | 0.003459924 | 0.183015383 | 0.855418046 | 0.920856171 |
| 222318_at   | -0.01735604 | -0.65780037 | 0.513243696 | 0.683876071 |
| 222319_at   | 0.138497069 | 2.604223346 | 0.011651398 | 0.039514667 |
| 222320_at   | 0.12847045  | 5.03456733  | 4.87E-06    | 5.89E-05    |
| 222321_at   | -0.01608106 | -0.61402179 | 0.541578793 | 0.706728823 |
| 222322_at   | 0.000618142 | 0.040282452 | 0.968004953 | 0.983765631 |
| 222323_at   | -0.05144892 | -1.20349599 | 0.233626596 | 0.402371814 |
| 222324_at   | -0.04700502 | -0.89774437 | 0.372997689 | 0.556074879 |
| 222325_at   | 0.111801302 | 2.28354125  | 0.026042762 | 0.076186628 |
| 222326_at   | 0.085796741 | 2.180008162 | 0.033288874 | 0.092504283 |
| 222327_x_at | 0.050696852 | 1.294168511 | 0.200687264 | 0.362710903 |
| 222328_x_at | -0.09519294 | -2.50751394 | 0.014951795 | 0.048460776 |
| 222329_x_at | -0.01706964 | -0.43847002 | 0.662658791 | 0.796352328 |
| 222330_at   | -0.04034791 | -1.93976375 | 0.057229206 | 0.141793147 |
| 222331_at   | -0.00566651 | -0.16474701 | 0.86971042  | 0.929638088 |
| 222332_at   | -0.02127438 | -0.70054897 | 0.48635843  | 0.660978137 |
| 222333_at   | 0.055996046 | 1.007927491 | 0.317635535 | 0.499004338 |
| 222334_at   | -0.00376194 | -0.12126841 | 0.903893554 | 0.948994801 |
| 222335_at   | -0.02641498 | -1.08330122 | 0.283114583 | 0.460506721 |
| 222336_at   | 0.023224798 | 1.210412305 | 0.230983155 | 0.399160348 |
| 222337_at   | 0.098022481 | 3.34100481  | 0.001457657 | 0.006997378 |
| 222338_x_at | 0.168220869 | 4.255480453 | 7.63E-05    | 0.0005878   |
| 222339_x_at | 0.122506434 | 3.014859772 | 0.003796831 | 0.015694411 |
| 222340_at   | -0.08683925 | -1.30053153 | 0.198513228 | 0.35972725  |
| 222341_x_at | 0.066158592 | 3.38695005  | 0.001268157 | 0.006214523 |
| 222342_at   | -0.01017876 | -0.28691244 | 0.775192001 | 0.871226888 |
| 222343_at   | -0.03052303 | -1.06964491 | 0.289167905 | 0.467497179 |
| 222344_at   | -0.00310068 | -0.15978319 | 0.873601663 | 0.932014168 |
| 222345_at   | 0.045768174 | 1.266225397 | 0.210445749 | 0.375174175 |
| 222346_at   | -0.03496858 | -0.88193046 | 0.381419803 | 0.56418904  |
| 222347_at   | 0.068625864 | 1.822965266 | 0.073413927 | 0.171780902 |
| 222348_at   | 0.195247346 | 5.244046674 | 2.26E-06    | 3.13E-05    |
| 222349_x_at | -0.02798308 | -0.7544727  | 0.453588527 | 0.632820704 |
| 222350_at   | 0.023322598 | 1.337991071 | 0.186071465 | 0.343816729 |
| 222351_at   | 0.074289558 | 1.038103887 | 0.303488751 | 0.483308608 |
| 222352_at   | -0.01384891 | -0.28748904 | 0.774752704 | 0.871045119 |
| 222353_at   | 0.004873187 | 0.201282366 | 0.84117524  | 0.912714652 |
| 222354_at   | -0.00975172 | -0.23781519 | 0.812854472 | 0.894899535 |
| 222355_at   | -0.13400344 | -2.94659714 | 0.004605692 | 0.018431015 |
| 222356_at   | 0.057586855 | 1.454077791 | 0.151263053 | 0.296073593 |
| 222357_at   | 0.516062219 | 8.890379863 | 1.85E-12    | 2.88E-09    |
| 222358_x_at | 0.176475297 | 4.20288005  | 9.12E-05    | 0.000682221 |
| 222359_x_at | -0.0076577  | -0.3182983  | 0.751390952 | 0.856968418 |
| 222360_at   | -0.16170264 | -4.62850142 | 2.09E-05    | 0.000198392 |
| 222361_at   | 0.002512675 | 0.088940581 | 0.929432579 | 0.963249329 |
| 222362_at   | -0.03729889 | -0.6457632  | 0.52095494  | 0.68983195  |
| 222363_at   | 0.048192368 | 1.08102318  | 0.284118184 | 0.461597646 |
| 222364_at   | 0.633490341 | 6.490234738 | 2.02E-08    | 7.42E-07    |
| 222365_at   | -0.01342307 | -0.33492742 | 0.73887648  | 0.848585795 |
| 222366_at   | 0.345614776 | 5.758511462 | 3.31E-07    | 6.48E-06    |
| 222367_at   | -0.0186524  | -0.77257647 | 0.442879801 | 0.623093372 |
| 222368_at   | 0.301147067 | 3.638874122 | 0.000580353 | 0.003250676 |
| 222369_at   | 0.180964691 | 3.964506799 | 0.000202577 | 0.001330822 |
| 222370_x_at | 0.073365367 | 1.913521878 | 0.060573015 | 0.148157246 |
| 222371_at   | 0.206581776 | 4.621048781 | 2.15E-05    | 0.000202658 |
| 222372_at   | 0.109851216 | 3.299049024 | 0.00165381  | 0.007780087 |
| 222373_at   | 0.01935375  | 0.580800652 | 0.563603198 | 0.724302646 |
| 222374_at   | 0.048379397 | 1.422097679 | 0.160301969 | 0.308762165 |
| 222375_at   | 0.069826891 | 1.314888834 | 0.19367278  | 0.353694994 |
| 222376_at   | 0.154059104 | 3.079368344 | 0.003155976 | 0.013402753 |
| 222377_at   | -0.03865908 | -0.91809155 | 0.362336522 | 0.545567813 |
| 222378_at   | 0.37430789  | 3.885972814 | 0.000262184 | 0.001658766 |
| 222379_at   | 0.204433169 | 3.739462782 | 0.00042131  | 0.002476544 |
| 222380_s_at | 0.27501932  | 4.470765556 | 3.63E-05    | 0.000315556 |
| 222381_at   | -0.02319895 | -0.51644315 | 0.607489549 | 0.757129952 |
| 222382_x_at | 0.009904492 | 0.49590236  | 0.621819207 | 0.767689061 |
| 222383_s_at | -0.05438398 | -1.14976166 | 0.254915544 | 0.428167675 |
| 222384_at   | 0.024516544 | 1.081209631 | 0.284035949 | 0.461527085 |
| 222385_x_at | -0.02408128 | -0.32262142 | 0.748130916 | 0.854799103 |
| 222386_s_at | -0.19136264 | -2.86440362 | 0.005791263 | 0.02224488  |
| 222387_s_at | -0.14534354 | -1.86359432 | 0.067394481 | 0.161077819 |
| 222388_s_at | -0.36216844 | -4.9178496  | 7.43E-06    | 8.38E-05    |
| 222389_s_at | 0.173637571 | 2.86539238  | 0.005775459 | 0.022194053 |
| 222390_at   | 0.244369987 | 3.88502452  | 0.000262998 | 0.001663208 |

|             |             |             |             |             |
|-------------|-------------|-------------|-------------|-------------|
| 222391_at   | -0.11283049 | -2.57410324 | 0.012600342 | 0.042119259 |
| 222392_x_at | 0.14550601  | 1.939914266 | 0.057210491 | 0.141765667 |
| 222393_s_at | -0.24626363 | -2.66884283 | 0.00983134  | 0.034423555 |
| 222394_at   | -0.11590795 | -2.34842217 | 0.022249355 | 0.067128075 |
| 222395_s_at | 0.306450998 | 5.091456782 | 3.96E-06    | 4.97E-05    |
| 222396_at   | -0.45956206 | -6.54179853 | 1.65E-08    | 6.45E-07    |
| 222397_at   | -0.00152457 | -0.05396485 | 0.957146829 | 0.978070587 |
| 222398_s_at | 0.047001955 | 0.982461149 | 0.329914019 | 0.512425013 |
| 222399_s_at | -0.11688371 | -1.27905614 | 0.205922016 | 0.369347619 |
| 222400_s_at | 0.038077049 | 0.707423343 | 0.482109058 | 0.657263682 |
| 222401_s_at | -0.05008046 | -0.66964495 | 0.505715764 | 0.677339035 |
| 222402_at   | -0.083692   | -1.09116861 | 0.27966752  | 0.456706771 |
| 222403_at   | -0.23284049 | -3.15435307 | 0.002538507 | 0.011142305 |
| 222404_x_at | 0.03873468  | 0.580173874 | 0.56402295  | 0.7245563   |
| 222405_at   | 0.000285974 | 0.005190209 | 0.99587647  | 0.997995945 |
| 222406_s_at | -0.06400267 | -1.03536788 | 0.304753417 | 0.484767929 |
| 222407_s_at | -0.09060072 | -1.37648432 | 0.17391169  | 0.327799808 |
| 222408_s_at | -0.16731829 | -2.08790653 | 0.041164995 | 0.10940139  |
| 222409_at   | 0.548324515 | 6.738129977 | 7.73E-09    | 3.72E-07    |
| 222410_s_at | 0.162168655 | 2.004003782 | 0.049701844 | 0.126886484 |
| 222411_s_at | 0.19882352  | 3.235760097 | 0.001997379 | 0.009100507 |
| 222412_s_at | 0.210262668 | 2.425813799 | 0.018374592 | 0.057522925 |
| 222413_s_at | 0.302754779 | 4.65284433  | 1.92E-05    | 0.000184308 |
| 222414_at   | 0.365538059 | 4.961948181 | 6.34E-06    | 7.33E-05    |
| 222415_at   | 0.351676681 | 5.548652381 | 7.29E-07    | 1.23E-05    |
| 222416_at   | -0.07767132 | -2.18035997 | 0.033261519 | 0.092474264 |
| 222417_s_at | -0.00748322 | -0.08684321 | 0.931092382 | 0.964097603 |
| 222418_s_at | -0.01109138 | -0.18892901 | 0.850801645 | 0.918122108 |
| 222419_x_at | 0.092382012 | 1.904061454 | 0.061818554 | 0.150544617 |
| 222420_s_at | 0.215777703 | 3.021452129 | 0.003726163 | 0.015446588 |
| 222421_at   | 0.209154613 | 4.346914956 | 5.58E-05    | 0.00045194  |
| 222422_s_at | -0.37385527 | -3.80632364 | 0.000339691 | 0.002064666 |
| 222423_at   | -0.45155746 | -4.23159515 | 8.28E-05    | 0.000628402 |
| 222424_s_at | 0.054304451 | 1.114467734 | 0.269631218 | 0.445270605 |
| 222425_s_at | -0.05010905 | -1.55186891 | 0.126081136 | 0.259370224 |
| 222426_at   | -0.12533076 | -2.55574436 | 0.013212638 | 0.043776354 |
| 222427_s_at | -0.08989812 | -1.27229673 | 0.208296069 | 0.372366716 |
| 222428_s_at | -0.0229475  | -0.35742497 | 0.722058508 | 0.837466406 |
| 222429_at   | 0.035747321 | 0.889369556 | 0.377443102 | 0.560086563 |
| 222430_s_at | -0.10245811 | -1.80828555 | 0.075696986 | 0.175916473 |
| 222431_at   | -0.16239613 | -2.53851526 | 0.013811667 | 0.045410949 |
| 222432_s_at | -0.09510192 | -1.23847129 | 0.220482544 | 0.387471763 |
| 222433_at   | 0.471101785 | 5.763103451 | 3.25E-07    | 6.39E-06    |
| 222434_at   | 0.255942748 | 4.47886985  | 3.53E-05    | 0.000308596 |
| 222435_s_at | 0.005681928 | 0.078126678 | 0.937993601 | 0.96750215  |
| 222436_s_at | -0.51980447 | -5.87408954 | 2.14E-07    | 4.54E-06    |
| 222437_s_at | -0.43484841 | -5.59914216 | 6.03E-07    | 1.05E-05    |
| 222438_at   | -0.0738495  | -1.44283545 | 0.154394119 | 0.30038666  |
| 222439_s_at | 0.002194969 | 0.0706143   | 0.943945304 | 0.971061677 |
| 222440_s_at | 0.067245442 | 1.890293897 | 0.06366996  | 0.154096061 |
| 222441_x_at | -0.19417785 | -3.16005039 | 0.002496553 | 0.010980804 |
| 222442_s_at | -0.37610934 | -3.44695488 | 0.00105561  | 0.005330769 |
| 222443_s_at | 0.015660778 | 0.290965303 | 0.77210581  | 0.869543213 |
| 222444_at   | -0.27616911 | -3.53154337 | 0.00081267  | 0.004286541 |
| 222445_at   | 0.063941688 | 1.734559974 | 0.088079413 | 0.197731822 |
| 222446_s_at | 0.102785707 | 2.587999644 | 0.012154134 | 0.040912296 |
| 222447_at   | -0.70051977 | -8.06053612 | 4.54E-11    | 1.37E-08    |
| 222448_s_at | 0.133569725 | 1.821375107 | 0.073658413 | 0.172244758 |
| 222449_at   | -0.51337796 | -7.49885342 | 4.03E-10    | 5.04E-08    |
| 222450_at   | -0.71060151 | -6.85459896 | 4.92E-09    | 2.75E-07    |
| 222451_s_at | 0.252745957 | 2.504921319 | 0.015050895 | 0.048750151 |
| 222452_s_at | -0.05989273 | -1.61473074 | 0.111744295 | 0.236674852 |
| 222453_at   | 0.607013773 | 5.306168803 | 1.80E-06    | 2.60E-05    |
| 222454_s_at | 0.034805086 | 0.969707098 | 0.336180305 | 0.518965499 |
| 222455_s_at | 0.107879223 | 2.605329654 | 0.011617815 | 0.039421359 |
| 222456_s_at | 0.014579333 | 0.487830718 | 0.627491065 | 0.772153162 |
| 222457_s_at | -0.02731707 | -0.67559788 | 0.50195495  | 0.674160675 |
| 222458_s_at | -0.21961231 | -3.55325759 | 0.000759484 | 0.004063457 |
| 222459_at   | -0.16497683 | -1.94045116 | 0.057143774 | 0.141631293 |
| 222460_s_at | -0.08884847 | -1.98062906 | 0.052336019 | 0.132214198 |
| 222461_s_at | -0.02354324 | -0.56731222 | 0.572670305 | 0.730833275 |
| 222462_s_at | 0.002843669 | 0.040221171 | 0.9680536   | 0.983792698 |
| 222463_s_at | 0.021622407 | 0.277198393 | 0.782603852 | 0.875774135 |
| 222464_s_at | 0.158858668 | 2.441916836 | 0.017648904 | 0.055648709 |
| 222465_at   | -0.04561101 | -0.57454007 | 0.567802814 | 0.727347443 |

|             |             |             |             |             |
|-------------|-------------|-------------|-------------|-------------|
| 222466_s_at | -0.02092313 | -0.60588689 | 0.546930961 | 0.710647707 |
| 222467_s_at | 0.171099555 | 2.665316239 | 0.009923545 | 0.034670346 |
| 222468_at   | -0.0349159  | -0.84760465 | 0.400108863 | 0.582540569 |
| 222469_s_at | -0.10233374 | -1.7277282  | 0.089307213 | 0.199815668 |
| 222470_s_at | -0.21773625 | -4.89227147 | 8.15E-06    | 9.00E-05    |
| 222471_s_at | -0.147848   | -2.99363995 | 0.004032872 | 0.016500697 |
| 222472_at   | 0.03393548  | 0.565134749 | 0.574140667 | 0.73199905  |
| 222473_s_at | 0.640919194 | 6.188168934 | 6.44E-08    | 1.79E-06    |
| 222474_s_at | -0.20332789 | -4.58137195 | 2.47E-05    | 0.000228221 |
| 222475_at   | 0.122530835 | 4.042101622 | 0.000156626 | 0.001072293 |
| 222476_at   | 0.041457472 | 0.800803873 | 0.426481981 | 0.607752462 |
| 222477_s_at | -0.16364646 | -2.79796887 | 0.006949413 | 0.025892719 |
| 222478_at   | -0.15907187 | -2.80800605 | 0.006761726 | 0.025300991 |
| 222479_s_at | -0.17383342 | -3.77944306 | 0.000370495 | 0.002219578 |
| 222480_at   | -0.03839238 | -0.95474963 | 0.343628613 | 0.526499022 |
| 222481_at   | 0.179979027 | 3.824321223 | 0.000320457 | 0.00196729  |
| 222482_at   | -0.25257689 | -4.40326783 | 4.59E-05    | 0.000383259 |
| 222483_at   | 0.07056662  | 2.00557046  | 0.049529441 | 0.126556549 |
| 222484_s_at | -0.39083739 | -3.22353196 | 0.002071075 | 0.009384089 |
| 222485_at   | -0.10072807 | -2.26525884 | 0.027210511 | 0.078726754 |
| 222486_s_at | 0.12247525  | 1.359517989 | 0.179194088 | 0.334917288 |
| 222487_s_at | 0.080773268 | 1.483725213 | 0.143243917 | 0.284590226 |
| 222488_s_at | 0.145278109 | 2.471179335 | 0.016395843 | 0.052325265 |
| 222489_s_at | -0.03763585 | -0.87854814 | 0.383236572 | 0.565872944 |
| 222490_at   | 0.002945452 | 0.085856505 | 0.931873335 | 0.964636173 |
| 222491_at   | -0.01684929 | -0.60640813 | 0.546587222 | 0.710463632 |
| 222492_at   | -0.04812955 | -1.07203726 | 0.288101054 | 0.466244652 |
| 222493_s_at | 0.016333973 | 0.405212805 | 0.686797502 | 0.813052394 |
| 222494_at   | 0.361515111 | 5.616601875 | 5.65E-07    | 9.97E-06    |
| 222495_at   | -0.0357699  | -0.72749431 | 0.469821559 | 0.646567056 |
| 222496_s_at | -0.0156792  | -0.45471037 | 0.650998624 | 0.788435105 |
| 222497_x_at | 0.152325555 | 2.413552285 | 0.018945008 | 0.058994586 |
| 222498_at   | -0.21824937 | -4.13474101 | 0.000114856 | 0.000828592 |
| 222499_at   | 0.095672307 | 2.825504968 | 0.006445645 | 0.024309601 |
| 222500_at   | -0.24277741 | -3.5239246  | 0.000832158 | 0.0043723   |
| 222501_s_at | -0.15094166 | -2.45264673 | 0.017179768 | 0.054430609 |
| 222502_s_at | -0.14583774 | -2.09906032 | 0.040132028 | 0.107137006 |
| 222503_s_at | -0.07861753 | -1.36629098 | 0.177070849 | 0.33208772  |
| 222504_s_at | 0.09264188  | 2.111196144 | 0.039033802 | 0.104799872 |
| 222505_at   | -0.3545075  | -4.80527078 | 1.11E-05    | 0.000116715 |
| 222506_at   | -0.33786501 | -5.20309955 | 2.63E-06    | 3.55E-05    |
| 222507_s_at | -0.06432157 | -0.72931753 | 0.468714239 | 0.645599802 |
| 222508_s_at | -0.03188041 | -0.68927312 | 0.493373314 | 0.667045019 |
| 222509_s_at | 0.025948227 | 0.42946818  | 0.669158437 | 0.800690804 |
| 222510_s_at | -0.15996876 | -2.87320522 | 0.005651981 | 0.021792628 |
| 222511_x_at | 0.039696498 | 0.721456912 | 0.473498896 | 0.64950777  |
| 222512_at   | 0.312636196 | 6.102583937 | 8.94E-08    | 2.31E-06    |
| 222513_s_at | 0.101733926 | 1.510524401 | 0.136286611 | 0.274537383 |
| 222514_at   | 0.035446663 | 0.643756384 | 0.522246473 | 0.691153076 |
| 222515_x_at | 0.002642059 | 0.065482547 | 0.948012817 | 0.973379399 |
| 222516_at   | 0.146532434 | 2.502065437 | 0.015160743 | 0.049073944 |
| 222517_at   | 0.030190443 | 1.29729866  | 0.199615578 | 0.361270729 |
| 222518_at   | 0.002930461 | 0.057556335 | 0.954297958 | 0.976497031 |
| 222519_s_at | -0.01994985 | -0.4972309  | 0.62088785  | 0.767259851 |
| 222520_s_at | -0.06433698 | -1.14841172 | 0.255467652 | 0.428788835 |
| 222521_x_at | -0.20712902 | -4.69189321 | 1.67E-05    | 0.000163801 |
| 222522_x_at | -0.13284106 | -2.81921503 | 0.006557656 | 0.024657139 |
| 222523_at   | -0.08542185 | -1.55803366 | 0.124613116 | 0.256951716 |
| 222524_s_at | -0.05378741 | -1.40760323 | 0.164534224 | 0.314851789 |
| 222525_s_at | 0.012936792 | 0.237776593 | 0.812884267 | 0.894899535 |
| 222526_at   | 0.060163085 | 1.543599618 | 0.128071974 | 0.262222497 |
| 222527_s_at | -0.05502265 | -1.24615222 | 0.217670252 | 0.383979432 |
| 222528_s_at | -0.04089593 | -0.68053326 | 0.498848533 | 0.671846029 |
| 222529_at   | 0.104352312 | 1.23889956  | 0.220325037 | 0.387302019 |
| 222530_s_at | -0.55966407 | -5.14244566 | 3.28E-06    | 4.26E-05    |
| 222531_s_at | -0.08002129 | -1.30605808 | 0.196639364 | 0.35744759  |
| 222532_at   | -0.03012442 | -0.58966718 | 0.557681902 | 0.7196362   |
| 222533_at   | -0.09708932 | -1.23420989 | 0.222054293 | 0.389033033 |
| 222534_s_at | -0.30580299 | -5.37719695 | 1.38E-06    | 2.08E-05    |
| 222535_at   | -0.15494293 | -3.83325755 | 0.000311299 | 0.001919815 |
| 222536_s_at | 0.089379359 | 2.389026706 | 0.020133831 | 0.061915722 |
| 222537_s_at | 0.167424843 | 3.627779304 | 0.000601054 | 0.003341915 |
| 222538_s_at | -0.08752285 | -1.49572182 | 0.140095674 | 0.280193534 |
| 222539_at   | -0.00884595 | -0.21798063 | 0.82820193  | 0.904589683 |
| 222540_s_at | 0.109780166 | 1.617530403 | 0.111137784 | 0.235724796 |

|             |             |             |             |             |
|-------------|-------------|-------------|-------------|-------------|
| 222541_at   | 0.038585754 | 1.065656934 | 0.290952375 | 0.469351366 |
| 222542_x_at | 0.040603622 | 0.976837002 | 0.332667637 | 0.515287215 |
| 222543_at   | -0.03085984 | -0.44083003 | 0.660959057 | 0.795186341 |
| 222544_s_at | 0.05651525  | 1.330266726 | 0.188587427 | 0.346843669 |
| 222545_s_at | 0.02490267  | 0.72276495  | 0.472700804 | 0.648871071 |
| 222546_s_at | -0.02335027 | -0.5616062  | 0.576527243 | 0.733785827 |
| 222547_at   | 0.548989512 | 5.44781935  | 1.06E-06    | 1.67E-05    |
| 222548_s_at | 0.515528541 | 6.30245114  | 4.16E-08    | 1.28E-06    |
| 222549_at   | -0.03489042 | -1.17870866 | 0.24328096  | 0.414103926 |
| 222550_at   | 0.075817979 | 1.505697841 | 0.13751949  | 0.276406915 |
| 222551_s_at | -0.03871733 | -1.36271604 | 0.178189134 | 0.333665882 |
| 222552_at   | -0.13464985 | -1.91137052 | 0.060854368 | 0.148698929 |
| 222553_x_at | -0.14547091 | -1.45702711 | 0.150449917 | 0.294907046 |
| 222554_s_at | -0.0387579  | -1.22963413 | 0.22375114  | 0.390908492 |
| 222555_s_at | -0.20941147 | -2.9957057  | 0.004009307 | 0.016422321 |
| 222556_at   | -0.0588389  | -1.33241631 | 0.187884698 | 0.346037374 |
| 222557_at   | -0.54251854 | -5.8557265  | 2.29E-07    | 4.79E-06    |
| 222558_at   | -0.15922773 | -2.57721684 | 0.012499092 | 0.041834002 |
| 222559_s_at | -0.18343447 | -2.50898923 | 0.014895668 | 0.048306885 |
| 222560_at   | -0.0452974  | -1.28642646 | 0.203356446 | 0.366172694 |
| 222561_at   | -0.22432612 | -4.6245187  | 2.12E-05    | 0.000200646 |
| 222562_s_at | -0.01082232 | -0.12666032 | 0.899643103 | 0.946244733 |
| 222563_s_at | 0.03088951  | 0.687811176 | 0.494286866 | 0.667775116 |
| 222564_at   | 0.026569593 | 1.01163575  | 0.315873569 | 0.497188739 |
| 222565_s_at | 0.194697406 | 4.194135015 | 9.40E-05    | 0.00069842  |
| 222566_at   | 0.218420568 | 4.550086544 | 2.75E-05    | 0.000249711 |
| 222567_s_at | -0.02291447 | -0.81425616 | 0.418796752 | 0.601176013 |
| 222568_at   | 0.013845448 | 0.408335223 | 0.684516714 | 0.811311085 |
| 222569_at   | 0.029764911 | 0.750983592 | 0.455669498 | 0.634634336 |
| 222570_at   | -0.54756863 | -5.90619968 | 1.89E-07    | 4.14E-06    |
| 222571_at   | -0.21931957 | -3.83029286 | 0.000314309 | 0.001936198 |
| 222572_at   | -1.02164033 | -6.6749943  | 9.88E-09    | 4.43E-07    |
| 222573_s_at | 0.054446725 | 1.312662695 | 0.194417427 | 0.354475509 |
| 222574_s_at | 0.059706205 | 0.979082187 | 0.331566559 | 0.5141259   |
| 222575_at   | 0.028125986 | 1.082093879 | 0.283646174 | 0.461088816 |
| 222576_s_at | 0.109845956 | 2.487828658 | 0.015719224 | 0.0505449   |
| 222577_at   | -0.04479505 | -1.29816864 | 0.199318482 | 0.360864557 |
| 222578_s_at | -0.05625807 | -1.36881038 | 0.176285976 | 0.330978108 |
| 222579_at   | -0.09156575 | -2.19850982 | 0.031876732 | 0.08940441  |
| 222580_at   | 0.23763001  | 3.378584126 | 0.001300827 | 0.006355112 |
| 222581_at   | 0.14134275  | 3.550743956 | 0.000765467 | 0.004087734 |
| 222582_at   | -0.46939299 | -5.31161919 | 1.76E-06    | 2.56E-05    |
| 222583_s_at | -0.16226412 | -4.32107566 | 6.10E-05    | 0.000485463 |
| 222584_at   | 0.01591818  | 0.320128435 | 0.750010301 | 0.855961705 |
| 222585_x_at | 0.182388663 | 4.055105037 | 0.000149983 | 0.001033938 |
| 222586_s_at | 0.515429584 | 4.343215452 | 5.65E-05    | 0.000456488 |
| 222587_s_at | 0.047192646 | 0.759159969 | 0.450801629 | 0.630171919 |
| 222588_s_at | -0.06917833 | -2.00414209 | 0.049686602 | 0.126862068 |
| 222589_at   | -0.13319602 | -1.64878588 | 0.104546114 | 0.225233673 |
| 222590_s_at | -0.20356135 | -3.50333583 | 0.000887068 | 0.004613348 |
| 222591_at   | -0.03364512 | -0.89100944 | 0.37657001  | 0.559355059 |
| 222592_s_at | 0.036322616 | 0.731151909 | 0.467601642 | 0.644782716 |
| 222593_s_at | -0.16492579 | -3.45569683 | 0.001027621 | 0.005215256 |
| 222594_s_at | -0.08378121 | -2.52606254 | 0.014259828 | 0.046545446 |
| 222595_s_at | 0.052585933 | 1.374566079 | 0.174502878 | 0.328607758 |
| 222596_s_at | 0.044159472 | 0.90754933  | 0.367835596 | 0.551007489 |
| 222597_at   | -0.09839276 | -2.70224052 | 0.008996175 | 0.03202111  |
| 222598_s_at | 0.145091682 | 3.200225377 | 0.002218676 | 0.009950532 |
| 222599_s_at | 0.282442711 | 5.439774788 | 1.09E-06    | 1.72E-05    |
| 222600_s_at | 0.208145742 | 3.805687455 | 0.000340391 | 0.002068075 |
| 222601_at   | 0.066458692 | 1.391271352 | 0.169405848 | 0.321571787 |
| 222602_at   | 0.126437249 | 2.017888382 | 0.048191772 | 0.123894769 |
| 222603_at   | 0.281325575 | 2.780381052 | 0.007289904 | 0.026921204 |
| 222604_at   | 0.050373751 | 1.128135023 | 0.263863238 | 0.438678945 |
| 222605_at   | 0.085957411 | 1.058195858 | 0.294311297 | 0.472955323 |
| 222606_at   | -0.23388716 | -3.66206319 | 0.000539263 | 0.00305382  |
| 222607_s_at | 0.004398379 | 0.067824366 | 0.946156473 | 0.972249797 |
| 222608_s_at | 0.567126719 | 3.800078533 | 0.000346621 | 0.002099645 |
| 222609_s_at | -0.13933155 | -2.96605979 | 0.004360099 | 0.017615398 |
| 222610_s_at | -0.06344754 | -1.39371109 | 0.16867113  | 0.320633992 |
| 222611_s_at | -0.09203619 | -1.37449863 | 0.174523693 | 0.328620012 |
| 222612_at   | -0.00997781 | -0.20881042 | 0.835320795 | 0.909040141 |
| 222613_at   | 0.005459037 | 0.09666241  | 0.923324517 | 0.959875267 |
| 222614_at   | -0.1258042  | -2.29410498 | 0.025388473 | 0.074604619 |
| 222615_s_at | -0.06342467 | -1.90906326 | 0.061157344 | 0.149267872 |

|             |             |             |             |             |
|-------------|-------------|-------------|-------------|-------------|
| 222616_s_at | 0.072591528 | 1.160295129 | 0.250636729 | 0.423287484 |
| 222617_s_at | -0.14385065 | -2.26012231 | 0.02754683  | 0.079473432 |
| 222618_at   | 0.165148177 | 4.522498406 | 3.03E-05    | 0.000270818 |
| 222619_at   | 0.141154662 | 1.732903734 | 0.088375781 | 0.198178144 |
| 222620_s_at | 0.320083708 | 6.484889234 | 2.06E-08    | 7.54E-07    |
| 222621_at   | 0.312178254 | 5.760268111 | 3.29E-07    | 6.44E-06    |
| 222622_at   | -0.30176849 | -4.68753531 | 1.70E-05    | 0.000165696 |
| 222623_s_at | -0.08874391 | -1.43366297 | 0.156985946 | 0.304026341 |
| 222624_s_at | 0.025059057 | 0.652540313 | 0.516605875 | 0.686391467 |
| 222625_s_at | 0.088977603 | 2.4303873   | 0.018165809 | 0.057005079 |
| 222626_at   | -0.02158535 | -0.57577119 | 0.566975765 | 0.726854233 |
| 222627_at   | 0.248329185 | 5.228526172 | 2.39E-06    | 3.28E-05    |
| 222628_s_at | 0.014069755 | 0.631469859 | 0.530190401 | 0.697476934 |
| 222629_at   | -0.01786792 | -0.37159081 | 0.711538538 | 0.830438833 |
| 222630_at   | 0.18843064  | 3.60538442  | 0.000645006 | 0.003547018 |
| 222631_at   | 0.090251886 | 2.612592145 | 0.011399534 | 0.038795915 |
| 222632_s_at | -0.01947732 | -0.26292951 | 0.79352768  | 0.882460911 |
| 222633_at   | 0.105429125 | 1.117837958 | 0.268200711 | 0.443585407 |
| 222634_s_at | -0.07460729 | -1.2286497  | 0.224117441 | 0.391229462 |
| 222635_s_at | 0.11826675  | 3.866672712 | 0.000279233 | 0.001751506 |
| 222636_at   | 0.007911792 | 0.250467631 | 0.803102318 | 0.889177666 |
| 222637_at   | -0.17233734 | -2.5657704  | 0.01287499  | 0.042861009 |
| 222638_s_at | -0.01448409 | -0.35649414 | 0.722751689 | 0.838013192 |
| 222639_s_at | 0.00019589  | 0.00680555  | 0.994593127 | 0.997404205 |
| 222640_at   | -0.02972105 | -0.93886818 | 0.351654471 | 0.534908328 |
| 222641_s_at | 0.010260943 | 0.315112139 | 0.753796538 | 0.858371499 |
| 222642_s_at | -0.08038656 | -1.63715267 | 0.106961331 | 0.228975226 |
| 222643_s_at | 0.002637817 | 0.05185993  | 0.958816783 | 0.978964872 |
| 222644_s_at | 0.001815395 | 0.060307979 | 0.952115672 | 0.975492392 |
| 222645_s_at | -0.02826334 | -0.65506764 | 0.514988973 | 0.685343393 |
| 222646_s_at | -0.14026183 | -2.5486808  | 0.013455319 | 0.044442032 |
| 222647_at   | 0.055382964 | 2.161962371 | 0.034718817 | 0.095674768 |
| 222648_at   | -0.05392798 | -1.59591121 | 0.115891122 | 0.243237374 |
| 222649_at   | 0.085281417 | 2.278842193 | 0.026338583 | 0.076835766 |
| 222650_s_at | 0.146318739 | 3.116826437 | 0.002831801 | 0.012238551 |
| 222651_s_at | 0.436852151 | 6.777339479 | 6.64E-09    | 3.37E-07    |
| 222652_s_at | 0.053749211 | 1.51106953  | 0.136147917 | 0.274321388 |
| 222653_at   | 0.024443861 | 0.525314715 | 0.601347653 | 0.75269401  |
| 222654_at   | -0.12840376 | -2.08371384 | 0.041559217 | 0.110201696 |
| 222655_s_at | -0.00932    | -0.19191644 | 0.848471528 | 0.916758686 |
| 222656_at   | -0.23314841 | -3.76857836 | 0.00038369  | 0.002288843 |
| 222657_s_at | -0.29809683 | -5.42653285 | 1.15E-06    | 1.79E-05    |
| 222658_s_at | -0.06530936 | -1.53938302 | 0.129096731 | 0.263776852 |
| 222659_at   | 0.047703336 | 1.514574422 | 0.135258855 | 0.273034723 |
| 222660_s_at | -0.072244   | -1.82548961 | 0.073027209 | 0.171080076 |
| 222661_at   | -0.01970692 | -0.40111085 | 0.689798248 | 0.815265862 |
| 222662_at   | 0.051014733 | 1.124742538 | 0.265286752 | 0.440390593 |
| 222663_at   | -0.05489644 | -1.52136044 | 0.133550577 | 0.270502713 |
| 222664_at   | 0.326745778 | 6.076651328 | 9.87E-08    | 2.50E-06    |
| 222665_at   | 0.279321289 | 4.27400828  | 7.16E-05    | 0.00055658  |
| 222666_s_at | 0.054063577 | 1.287082787 | 0.203129144 | 0.365914514 |
| 222667_s_at | 0.039520689 | 0.715092599 | 0.477392872 | 0.653045276 |
| 222668_at   | 0.520642431 | 6.90432829  | 4.06E-09    | 2.39E-07    |
| 222669_s_at | 0.057010783 | 0.647139034 | 0.520070467 | 0.689191677 |
| 222670_s_at | 0.215858765 | 2.795535424 | 0.006995634 | 0.02603021  |
| 222671_s_at | 0.044711126 | 1.252614645 | 0.215324667 | 0.381165684 |
| 222672_at   | -0.09420863 | -2.29195413 | 0.025520496 | 0.074933448 |
| 222673_x_at | -0.22686935 | -3.12359027 | 0.002776695 | 0.012037644 |
| 222674_at   | 0.148151577 | 3.518405685 | 0.000846551 | 0.00443437  |
| 222675_s_at | 0.039837832 | 1.462019214 | 0.149081378 | 0.29292533  |
| 222676_at   | 0.026560062 | 0.742801761 | 0.460570848 | 0.638999439 |
| 222677_x_at | -0.06871198 | -1.9563041  | 0.055203532 | 0.137891585 |
| 222678_s_at | -0.0273118  | -0.67206393 | 0.504185717 | 0.676148619 |
| 222679_s_at | 0.232722629 | 2.699973158 | 0.00905075  | 0.032197415 |
| 222680_s_at | -0.05854285 | -1.44352745 | 0.154199946 | 0.300100331 |
| 222681_at   | -0.02814081 | -0.67980577 | 0.499305767 | 0.672077022 |
| 222682_s_at | 0.071376865 | 1.400987837 | 0.166494326 | 0.317691248 |
| 222683_at   | 0.270621024 | 5.277344188 | 2.00E-06    | 2.83E-05    |
| 222684_s_at | 0.091830356 | 2.509542314 | 0.014874675 | 0.048245806 |
| 222685_at   | -0.02573659 | -0.35686838 | 0.722472967 | 0.837820438 |
| 222686_s_at | -0.01523722 | -0.29602805 | 0.768255805 | 0.867327366 |
| 222687_s_at | 0.090992299 | 1.790604253 | 0.078525464 | 0.180965299 |
| 222688_at   | 0.351756533 | 4.445034507 | 3.97E-05    | 0.000340428 |
| 222689_at   | 0.053304574 | 0.747420005 | 0.457800566 | 0.636526095 |
| 222690_s_at | 0.11561757  | 3.136166627 | 0.002676895 | 0.011670645 |

|             |             |             |             |             |
|-------------|-------------|-------------|-------------|-------------|
| 222691_at   | 0.137874184 | 2.008394505 | 0.049219972 | 0.125915225 |
| 222692_s_at | 0.014508669 | 0.430412063 | 0.668475715 | 0.800203828 |
| 222693_at   | 0.006117641 | 0.293360442 | 0.770283683 | 0.868563602 |
| 222694_at   | 0.001019827 | 0.037328141 | 0.970350314 | 0.984986202 |
| 222695_s_at | 0.01117866  | 0.371156147 | 0.711860507 | 0.830724696 |
| 222696_at   | 0.133339634 | 2.337320031 | 0.022861298 | 0.0686315   |
| 222697_s_at | -0.30372266 | -3.28005691 | 0.001750566 | 0.008158111 |
| 222698_s_at | -0.08374001 | -1.15710467 | 0.251927265 | 0.424776779 |
| 222699_s_at | 0.047200243 | 0.883156639 | 0.380762516 | 0.563571398 |
| 222700_at   | -0.27315996 | -3.83279939 | 0.000311763 | 0.0019221   |
| 222701_s_at | -0.15482821 | -2.54497166 | 0.013584364 | 0.044783588 |
| 222702_x_at | -0.10843652 | -1.28739223 | 0.203022042 | 0.365762127 |
| 222703_s_at | -0.09019288 | -1.89254685 | 0.063363814 | 0.153471471 |
| 222704_at   | 0.020811852 | 0.78981825  | 0.432820155 | 0.613692841 |
| 222705_s_at | -0.11701195 | -3.55357823 | 0.000758724 | 0.004060946 |
| 222706_at   | 0.035009791 | 0.893436307 | 0.375280271 | 0.558311435 |
| 222707_s_at | -0.01876024 | -0.7170354  | 0.476202275 | 0.652092394 |
| 222708_s_at | 0.140705988 | 3.625871449 | 0.000604684 | 0.003357087 |
| 222709_at   | 0.110864566 | 3.858297152 | 0.000286959 | 0.001793672 |
| 222710_at   | -0.01086638 | -0.3376122  | 0.736862549 | 0.847114098 |
| 222711_s_at | -0.01309333 | -0.33746399 | 0.736973674 | 0.847162413 |
| 222712_s_at | -0.08011649 | -1.87342736 | 0.066001937 | 0.158441912 |
| 222713_s_at | -0.04070605 | -1.14268027 | 0.257821223 | 0.431556033 |
| 222714_s_at | 0.119364151 | 1.418189209 | 0.161434811 | 0.310289203 |
| 222715_s_at | 0.144498011 | 3.145703121 | 0.002603469 | 0.011389413 |
| 222716_s_at | 0.21962779  | 6.410440442 | 2.74E-08    | 9.29E-07    |
| 222717_at   | 0.163662199 | 2.119206198 | 0.038323361 | 0.103351897 |
| 222718_at   | -0.03085381 | -1.275327   | 0.207229266 | 0.370978985 |
| 222719_s_at | -0.09048959 | -1.69895222 | 0.094634939 | 0.208767694 |
| 222720_x_at | 0.024136455 | 0.795363018 | 0.429614127 | 0.610561089 |
| 222721_at   | 0.593227967 | 5.872743617 | 2.15E-07    | 4.56E-06    |
| 222722_at   | 0.006549207 | 0.090753069 | 0.927998482 | 0.962371656 |
| 222723_at   | 0.092700816 | 2.625646349 | 0.011016543 | 0.03769341  |
| 222724_at   | -0.06522372 | -1.8388346  | 0.07101112  | 0.167473824 |
| 222725_s_at | 0.003085316 | 0.079254449 | 0.93710042  | 0.96732401  |
| 222726_s_at | -0.01970457 | -0.28067725 | 0.779947104 | 0.87416667  |
| 222727_s_at | 0.041666238 | 1.323116057 | 0.190939396 | 0.349918542 |
| 222728_s_at | 0.189885663 | 2.69332323  | 0.009212567 | 0.032671642 |
| 222729_at   | -0.17387831 | -3.58991277 | 0.000677143 | 0.003692066 |
| 222730_s_at | 0.094010045 | 2.050708895 | 0.044778623 | 0.117052478 |
| 222731_at   | 0.165708346 | 1.705686156 | 0.09336532  | 0.206650302 |
| 222732_at   | 0.142895643 | 4.369717152 | 5.16E-05    | 0.000422855 |
| 222733_x_at | 0.14823822  | 3.709879145 | 0.000463138 | 0.002684794 |
| 222734_at   | -0.12854618 | -2.36525668 | 0.021349303 | 0.064956297 |
| 222735_at   | 0.13189389  | 3.045035872 | 0.003483269 | 0.01459127  |
| 222736_s_at | -0.04774285 | -0.9215068  | 0.360566434 | 0.543719845 |
| 222737_s_at | 0.132206335 | 2.989297706 | 0.004082828 | 0.016682184 |
| 222738_at   | 0.086639253 | 2.157769719 | 0.035058646 | 0.096379467 |
| 222739_at   | 0.030118804 | 0.771355991 | 0.443597048 | 0.623807912 |
| 222740_at   | -0.08450562 | -2.13800217 | 0.036700396 | 0.099905121 |
| 222741_s_at | 0.035106018 | 0.867898287 | 0.388992432 | 0.571835152 |
| 222742_s_at | -0.10555962 | -2.10575218 | 0.039523172 | 0.105859379 |
| 222743_s_at | 0.014949111 | 0.31060609  | 0.757202835 | 0.860369387 |
| 222744_s_at | -0.11397461 | -2.82456508 | 0.00646227  | 0.024359966 |
| 222745_s_at | 0.152028364 | 4.000830339 | 0.000179646 | 0.001203709 |
| 222746_s_at | -0.60772053 | -7.00489081 | 2.75E-09    | 1.80E-07    |
| 222747_s_at | -0.05636327 | -1.48146196 | 0.143844053 | 0.28554137  |
| 222748_s_at | 0.019253381 | 0.483925828 | 0.630243143 | 0.774053467 |
| 222749_at   | 0.136341188 | 2.970624993 | 0.004304282 | 0.017437182 |
| 222750_s_at | -0.19038758 | -2.34862052 | 0.022238556 | 0.067104553 |
| 222751_at   | 0.144203882 | 2.578167243 | 0.012468334 | 0.0417592   |
| 222752_s_at | 0.045923962 | 0.373491597 | 0.71013118  | 0.829689888 |
| 222753_s_at | 0.004049757 | 0.086322888 | 0.931504194 | 0.964367612 |
| 222754_at   | -0.2034721  | -2.30402418 | 0.024787429 | 0.073218757 |
| 222755_s_at | 0.043530413 | 1.397146818 | 0.167640633 | 0.319257346 |
| 222756_s_at | 0.420257863 | 6.68906378  | 9.35E-09    | 4.27E-07    |
| 222757_s_at | 0.110664368 | 2.229574092 | 0.029623996 | 0.084263978 |
| 222758_s_at | -0.00866923 | -0.1532019  | 0.878765697 | 0.93501563  |
| 222759_at   | 0.120200802 | 1.721171419 | 0.090498856 | 0.201744556 |
| 222760_at   | 0.238974835 | 4.049643337 | 0.000152739 | 0.001049219 |
| 222761_at   | -0.03384113 | -0.80430445 | 0.42447404  | 0.605973097 |
| 222762_x_at | 0.245326151 | 4.41814951  | 4.36E-05    | 0.000367164 |
| 222763_s_at | 0.147849712 | 2.566612292 | 0.012846997 | 0.042782089 |
| 222764_at   | 0.177713892 | 3.355923418 | 0.001393369 | 0.006734299 |
| 222765_x_at | 0.099473894 | 2.037704745 | 0.046105134 | 0.119784365 |

|             |             |             |             |             |
|-------------|-------------|-------------|-------------|-------------|
| 222766_at   | -0.09988653 | -3.48055488 | 0.000951834 | 0.004892956 |
| 222767_s_at | -0.04917903 | -1.64859736 | 0.104584897 | 0.225258227 |
| 222768_s_at | -0.13592754 | -2.35340648 | 0.021979406 | 0.06651118  |
| 222769_at   | 0.005059406 | 0.127492503 | 0.898987355 | 0.945984334 |
| 222770_s_at | -0.0633516  | -1.07406484 | 0.287199004 | 0.465408386 |
| 222771_s_at | 0.133146881 | 1.935118372 | 0.057809401 | 0.142843907 |
| 222772_at   | -0.15081843 | -3.1761826  | 0.002381261 | 0.010551586 |
| 222773_s_at | -0.03304716 | -0.84518019 | 0.401449911 | 0.583770398 |
| 222774_s_at | -1.08749321 | -7.69116526 | 1.91E-10    | 3.17E-08    |
| 222775_s_at | -0.19932011 | -5.70958553 | 3.98E-07    | 7.54E-06    |
| 222776_at   | -0.07413021 | -1.89749519 | 0.06269578  | 0.152290873 |
| 222777_s_at | 0.031830678 | 0.845982978 | 0.401005557 | 0.583257081 |
| 222778_s_at | -0.07121674 | -2.24270911 | 0.028714497 | 0.082215921 |
| 222779_s_at | 0.103543759 | 2.595297061 | 0.011925612 | 0.040270676 |
| 222780_s_at | -0.04237038 | -0.53253065 | 0.596373271 | 0.749019622 |
| 222781_s_at | -0.06929669 | -2.11971821 | 0.038278335 | 0.103283589 |
| 222782_s_at | -0.00591167 | -0.15732747 | 0.875527918 | 0.933222679 |
| 222783_s_at | 0.123180229 | 2.814137043 | 0.006649391 | 0.024945403 |
| 222784_at   | 0.274022023 | 5.724896637 | 3.76E-07    | 7.18E-06    |
| 222785_x_at | -0.39769853 | -5.98131742 | 1.42E-07    | 3.32E-06    |
| 222786_at   | 0.040538711 | 0.852954291 | 0.397159584 | 0.579492528 |
| 222787_s_at | 0.390225623 | 4.796477665 | 1.15E-05    | 0.000119802 |
| 222788_s_at | 0.070298872 | 1.411344444 | 0.163433642 | 0.313188248 |
| 222789_at   | -0.0113466  | -0.16530255 | 0.869275125 | 0.9292617   |
| 222790_s_at | 0.138841522 | 3.016488497 | 0.003779256 | 0.015636226 |
| 222791_at   | 0.127372283 | 1.743934516 | 0.086417383 | 0.194911212 |
| 222792_s_at | 0.136471782 | 3.435024806 | 0.001094974 | 0.005491088 |
| 222793_at   | 0.100315302 | 2.672775219 | 0.009729449 | 0.034139008 |
| 222794_x_at | 0.128630244 | 1.680131457 | 0.098258835 | 0.214685106 |
| 222795_s_at | -0.06019722 | -1.14791846 | 0.2556696   | 0.429051289 |
| 222796_at   | 0.21017254  | 4.066651632 | 0.000144312 | 0.001001706 |
| 222797_at   | -0.391909   | -4.92783546 | 7.17E-06    | 8.14E-05    |
| 222798_at   | 0.163285438 | 4.3315307   | 5.88E-05    | 0.000471281 |
| 222799_at   | -0.05232506 | -0.96478143 | 0.338621265 | 0.52132907  |
| 222800_at   | 0.162701898 | 4.268923577 | 7.29E-05    | 0.000565346 |
| 222801_s_at | -0.06665161 | -1.63115995 | 0.10822309  | 0.231159342 |
| 222802_at   | 0.073752208 | 0.644842494 | 0.521547273 | 0.690391289 |
| 222803_at   | 0.274995534 | 2.366200054 | 0.021299842 | 0.06483229  |
| 222804_x_at | -0.13776054 | -2.17018873 | 0.034060421 | 0.094243952 |
| 222805_at   | 0.170032516 | 2.239055851 | 0.028964948 | 0.082821591 |
| 222806_s_at | 0.111053478 | 1.997615978 | 0.050410134 | 0.128291653 |
| 222807_at   | 0.115446469 | 3.242468997 | 0.001958002 | 0.008949937 |
| 222808_at   | -0.08079769 | -0.94358645 | 0.349257422 | 0.532346225 |
| 222809_x_at | -0.1874145  | -4.04591086 | 0.000154651 | 0.001060559 |
| 222810_s_at | -0.2161097  | -4.89687537 | 8.02E-06    | 8.88E-05    |
| 222811_at   | 0.141943168 | 2.22916421  | 0.029652781 | 0.08431366  |
| 222812_s_at | 0.016427571 | 0.505496897 | 0.6151071   | 0.763205871 |
| 222813_at   | -0.07273785 | -2.1290021  | 0.037469873 | 0.101564991 |
| 222814_s_at | -0.04682983 | -1.052301   | 0.296983907 | 0.475983674 |
| 222815_at   | 0.020681706 | 0.265965076 | 0.791200179 | 0.881078374 |
| 222816_s_at | 0.144755332 | 1.486782572 | 0.142436342 | 0.283491615 |
| 222817_at   | 0.096673445 | 2.723209811 | 0.008505546 | 0.030603805 |
| 222818_at   | 0.123727282 | 3.654885394 | 0.000551675 | 0.003111493 |
| 222819_at   | 0.062686697 | 1.542577869 | 0.128319692 | 0.26257331  |
| 222820_at   | 0.393869091 | 6.364314872 | 3.28E-08    | 1.06E-06    |
| 222821_s_at | -0.05298721 | -1.39740204 | 0.167564278 | 0.319160531 |
| 222822_s_at | 0.027831236 | 0.910358166 | 0.366365255 | 0.549557026 |
| 222823_at   | 0.045704424 | 1.571380242 | 0.121481729 | 0.251875513 |
| 222824_at   | -0.03656659 | -0.65477226 | 0.515177809 | 0.685526553 |
| 222825_at   | 0.074496202 | 1.007261986 | 0.317952445 | 0.499224659 |
| 222826_at   | -0.34757462 | -2.96098279 | 0.004422963 | 0.017830692 |
| 222827_s_at | -0.04088975 | -1.06582233 | 0.290878218 | 0.469277645 |
| 222828_at   | -0.06377378 | -1.88003944 | 0.06507928  | 0.156726111 |
| 222829_s_at | 0.113399814 | 3.075582519 | 0.003190603 | 0.013525033 |
| 222830_at   | 0.025592424 | 0.734827435 | 0.465376863 | 0.643174807 |
| 222831_at   | -0.07294527 | -0.94343576 | 0.349333811 | 0.532377092 |
| 222832_s_at | -0.07517932 | -0.80412297 | 0.424577996 | 0.606005359 |
| 222833_at   | 0.086725895 | 1.951874355 | 0.055739935 | 0.138936374 |
| 222834_s_at | 0.284140887 | 4.984503856 | 5.84E-06    | 6.83E-05    |
| 222835_at   | 0.089544535 | 2.10713634  | 0.039398243 | 0.105581715 |
| 222836_at   | 0.052551388 | 1.031050134 | 0.306756501 | 0.486948979 |
| 222837_s_at | -0.04699273 | -1.49862882 | 0.139341076 | 0.278994282 |
| 222838_at   | -0.04968061 | -1.32062803 | 0.19176292  | 0.351125386 |
| 222839_s_at | 0.023986963 | 0.548286342 | 0.585579278 | 0.740834204 |
| 222840_at   | -0.07705165 | -1.64209762 | 0.105929203 | 0.227397471 |



|             |             |             |             |             |
|-------------|-------------|-------------|-------------|-------------|
| 222841_s_at | -0.12010731 | -3.49855423 | 0.000900304 | 0.004672133 |
| 222842_at   | 0.076768963 | 2.603633351 | 0.011669344 | 0.039548639 |
| 222843_at   | -0.07497818 | -1.66992951 | 0.100270238 | 0.218013986 |
| 222844_s_at | -0.06146478 | -1.25986538 | 0.212715258 | 0.37793871  |
| 222845_x_at | 0.031335084 | 0.443231767 | 0.659231111 | 0.794066434 |
| 222846_at   | -0.19528216 | -2.15582481 | 0.035217274 | 0.096708473 |
| 222847_s_at | 0.147921315 | 3.301974518 | 0.001639362 | 0.007726074 |
| 222848_at   | -0.06981907 | -2.7133894  | 0.008732181 | 0.031243187 |
| 222849_s_at | -0.17365082 | -2.12879892 | 0.037487405 | 0.101599219 |
| 222850_s_at | -0.1965425  | -1.79891063 | 0.077185889 | 0.178550297 |
| 222851_at   | -0.06538148 | -1.6093113  | 0.112925957 | 0.238488181 |
| 222852_at   | -0.08116863 | -2.64599284 | 0.010442939 | 0.03610675  |
| 222853_at   | -0.1127348  | -2.13701296 | 0.03678429  | 0.100095195 |
| 222854_s_at | 0.184624258 | 3.455244876 | 0.001029051 | 0.005220836 |
| 222855_s_at | -0.00057858 | -0.01630794 | 0.98704415  | 0.993692185 |
| 222856_at   | 0.132591515 | 3.321575937 | 0.001545588 | 0.007345325 |
| 222857_s_at | 0.326698993 | 3.115702595 | 0.002841056 | 0.012274988 |
| 222858_s_at | 0.088669311 | 2.55607922  | 0.013201233 | 0.043741808 |
| 222859_s_at | -0.10167996 | -2.71237589 | 0.008755883 | 0.031302931 |
| 222860_s_at | -0.05455586 | -1.72141461 | 0.090454425 | 0.201685748 |
| 222861_x_at | 0.064200768 | 1.394331009 | 0.168484834 | 0.320408672 |
| 222862_s_at | -0.29241342 | -2.81140251 | 0.00669928  | 0.025100321 |
| 222863_at   | 0.046033561 | 0.974032962 | 0.334046184 | 0.5168493   |
| 222864_s_at | -0.0644332  | -2.16820404 | 0.034218255 | 0.094581128 |
| 222865_x_at | 0.057789899 | 1.679489525 | 0.098384416 | 0.214896452 |
| 222866_s_at | -0.09302367 | -2.28150091 | 0.026170844 | 0.076490409 |
| 222867_s_at | -0.24900412 | -5.02016501 | 5.13E-06    | 6.15E-05    |
| 222868_s_at | 0.052097158 | 0.749510105 | 0.456549965 | 0.635469001 |
| 222869_s_at | 0.117447148 | 2.996148191 | 0.004004276 | 0.016413748 |
| 222870_s_at | -0.76672797 | -6.61573456 | 1.24E-08    | 5.27E-07    |
| 222871_at   | -0.08692302 | -2.07171525 | 0.042705567 | 0.112630862 |
| 222872_x_at | 0.108504996 | 2.998180699 | 0.003981242 | 0.016335812 |
| 222873_s_at | -0.05358596 | -1.45425119 | 0.151215152 | 0.296015796 |
| 222874_s_at | 0.029777741 | 0.422992643 | 0.673849814 | 0.803916394 |
| 222875_at   | -0.0504323  | -1.545733   | 0.127555977 | 0.261429503 |
| 222876_s_at | 0.105408776 | 2.743704418 | 0.008049852 | 0.029246725 |
| 222877_at   | 0.144183075 | 2.48107634  | 0.015990538 | 0.051277114 |
| 222878_s_at | -0.04697974 | -0.94570953 | 0.348182302 | 0.531217814 |
| 222879_s_at | -0.04298021 | -1.34347437 | 0.184300953 | 0.341570711 |
| 222880_at   | -0.19544605 | -3.44115062 | 0.001074591 | 0.00540707  |
| 222881_at   | -0.07969697 | -2.23071114 | 0.029544271 | 0.084079249 |
| 222882_s_at | -0.01778724 | -0.62026651 | 0.537488496 | 0.703531761 |
| 222883_at   | -0.07550569 | -1.67731654 | 0.098810491 | 0.215584773 |
| 222884_at   | -0.06414865 | -1.61941123 | 0.110731824 | 0.235065154 |
| 222885_at   | 0.18666544  | 2.263777578 | 0.027307123 | 0.078944949 |
| 222886_at   | -0.03136673 | -1.44421907 | 0.15400607  | 0.299806925 |
| 222887_s_at | -0.04948986 | -1.33174661 | 0.188103418 | 0.346325058 |
| 222888_at   | 0.005773341 | 0.149992593 | 0.881285825 | 0.936545794 |
| 222889_at   | 0.052957862 | 1.237863798 | 0.220706106 | 0.387613094 |
| 222890_at   | 0.33010377  | 2.030873462 | 0.046815474 | 0.121193069 |
| 222891_s_at | -0.53841319 | -6.70295522 | 8.86E-09    | 4.11E-07    |
| 222892_s_at | -0.01338078 | -0.45572393 | 0.650273769 | 0.788101618 |
| 222893_s_at | -0.01896919 | -0.65731883 | 0.513551007 | 0.684183558 |
| 222894_x_at | -0.25383841 | -3.49942057 | 0.000897892 | 0.004661239 |
| 222895_s_at | -1.12668674 | -6.59684316 | 1.34E-08    | 5.55E-07    |
| 222896_at   | -0.17382697 | -4.23931931 | 8.06E-05    | 0.000614293 |
| 222897_s_at | -0.00283542 | -0.08305547 | 0.934090664 | 0.965731266 |
| 222898_s_at | 0.049037734 | 1.436728889 | 0.156115884 | 0.302761168 |
| 222899_at   | 0.045535528 | 1.472056301 | 0.14635932  | 0.289032332 |
| 222900_at   | -0.32594317 | -4.52674039 | 2.99E-05    | 0.000267627 |
| 222901_s_at | -0.04680485 | -1.16378322 | 0.249231223 | 0.421694626 |
| 222902_s_at | -0.13742191 | -4.17814828 | 9.92E-05    | 0.000731778 |
| 222903_s_at | -0.06023555 | -1.11780542 | 0.268214495 | 0.443586656 |
| 222904_s_at | 0.03397392  | 1.092416224 | 0.279123584 | 0.456042671 |
| 222905_s_at | 0.009430895 | 0.339078499 | 0.735763413 | 0.846368329 |
| 222906_at   | 0.040848146 | 0.907281667 | 0.367975906 | 0.551162249 |
| 222907_x_at | -0.00806881 | -0.1372532  | 0.891301428 | 0.941856849 |
| 222908_at   | 0.109699787 | 1.986706239 | 0.051639891 | 0.130788282 |
| 222909_s_at | -0.17799214 | -3.60397727 | 0.000647868 | 0.003560564 |
| 222910_s_at | 0.376833739 | 3.203560407 | 0.002196965 | 0.009869008 |
| 222911_s_at | 0.043070962 | 1.306192351 | 0.196594002 | 0.357394205 |
| 222912_at   | 0.523915477 | 6.939189128 | 3.55E-09    | 2.17E-07    |
| 222913_at   | -0.05052239 | -1.7643332  | 0.08289054  | 0.188632995 |
| 222914_s_at | -0.12011172 | -2.27259772 | 0.026736299 | 0.077691722 |
| 222915_s_at | -0.03645945 | -1.15504168 | 0.25276427  | 0.425733836 |

|             |             |             |             |             |
|-------------|-------------|-------------|-------------|-------------|
| 222916_s_at | -0.05290296 | -1.02302504 | 0.310503213 | 0.491208927 |
| 222917_s_at | -0.00672837 | -0.15836255 | 0.874715914 | 0.932601833 |
| 222918_at   | -0.55231711 | -6.88020615 | 4.46E-09    | 2.56E-07    |
| 222919_at   | 0.067583994 | 1.316083197 | 0.19327415  | 0.353154598 |
| 222920_s_at | -0.77207011 | -5.85512358 | 2.29E-07    | 4.80E-06    |
| 222921_s_at | 0.082281946 | 1.644067172 | 0.105520375 | 0.226769943 |
| 222922_at   | -0.05579003 | -1.44430506 | 0.153981978 | 0.299780561 |
| 222923_s_at | 0.01831464  | 0.512548182 | 0.61019513  | 0.759189353 |
| 222924_at   | -0.24790506 | -5.03795368 | 4.81E-06    | 5.83E-05    |
| 222925_at   | 0.221922564 | 2.328167955 | 0.023376985 | 0.069911953 |
| 222926_at   | 0.017463376 | 0.745716351 | 0.458821395 | 0.637415162 |
| 222927_s_at | -0.13109383 | -4.16808124 | 0.000102643 | 0.000753747 |
| 222928_s_at | 0.041842229 | 1.062287751 | 0.292465868 | 0.470971952 |
| 222929_at   | 0.058127158 | 2.011663481 | 0.048863826 | 0.12519762  |
| 222930_s_at | -0.00455243 | -0.12862022 | 0.898098842 | 0.945420644 |
| 222931_s_at | -0.09252863 | -2.56215001 | 0.012996001 | 0.043183439 |
| 222932_at   | -0.02797489 | -0.83764601 | 0.405634949 | 0.58792402  |
| 222933_at   | -0.10556163 | -2.74831411 | 0.007950494 | 0.028935136 |
| 222934_s_at | 0.0859879   | 1.803215219 | 0.076499231 | 0.177273858 |
| 222935_x_at | 0.03055086  | 0.722509682 | 0.472856495 | 0.64898932  |
| 222936_s_at | 0.003040403 | 0.106522334 | 0.91553198  | 0.955101774 |
| 222937_s_at | -0.02448687 | -0.78772106 | 0.43403646  | 0.614773792 |
| 222938_x_at | -0.0216648  | -0.59219467 | 0.555999683 | 0.718296174 |
| 222939_s_at | -0.22086924 | -5.62692906 | 5.43E-07    | 9.68E-06    |
| 222940_at   | 0.007283115 | 0.25353949  | 0.800739287 | 0.887367408 |
| 222941_at   | -0.09026817 | -2.13144938 | 0.037259257 | 0.101079926 |
| 222942_s_at | -0.38383877 | -5.91290948 | 1.84E-07    | 4.05E-06    |
| 222943_at   | -0.02889553 | -1.03400464 | 0.305384887 | 0.485375063 |
| 222944_s_at | -0.04503439 | -1.29895691 | 0.199049575 | 0.360567591 |
| 222945_x_at | 0.003038247 | 0.086374512 | 0.931463335 | 0.964367612 |
| 222946_s_at | 0.031212025 | 0.781529402 | 0.437639226 | 0.618074649 |
| 222947_at   | -0.12262849 | -3.77637377 | 0.000374178 | 0.002238955 |
| 222948_s_at | 0.020003173 | 0.615088653 | 0.54087887  | 0.706350505 |
| 222949_at   | -0.07235393 | -2.16181753 | 0.034730509 | 0.095701085 |
| 222950_at   | -0.0273566  | -0.96574462 | 0.338143034 | 0.520951721 |
| 222951_s_at | 0.062407869 | 1.823545729 | 0.073324851 | 0.1716174   |
| 222952_s_at | 0.029268711 | 0.785350674 | 0.435413644 | 0.61604111  |
| 222953_at   | -0.15387994 | -1.91686781 | 0.060137633 | 0.147310008 |
| 222954_at   | 0.013824482 | 0.429061335 | 0.669452799 | 0.800899015 |
| 222955_s_at | -0.09263754 | -1.95132928 | 0.055806246 | 0.139070633 |
| 222956_at   | 0.192552749 | 4.338291574 | 5.75E-05    | 0.000462945 |
| 222957_at   | 0.038899242 | 1.065484744 | 0.291029595 | 0.469437133 |
| 222958_s_at | -0.02079507 | -0.72257417 | 0.472817162 | 0.648970997 |
| 222959_at   | -0.03969753 | -0.917472   | 0.362658225 | 0.545794767 |
| 222960_at   | 0.008503406 | 0.23463458  | 0.815310753 | 0.896529568 |
| 222961_at   | -0.06790897 | -1.84415033 | 0.070221186 | 0.166075316 |
| 222962_s_at | 0.03914925  | 1.229344736 | 0.223858776 | 0.391037578 |
| 222963_s_at | -0.03408512 | -0.66634771 | 0.507805347 | 0.678957596 |
| 222964_at   | -0.05897622 | -1.7091705  | 0.092713903 | 0.205534214 |
| 222965_at   | -0.0117438  | -0.23851323 | 0.812315647 | 0.894672258 |
| 222966_at   | -0.04878337 | -1.6790649  | 0.098467557 | 0.215015003 |
| 222967_at   | -0.22439288 | -2.12444465 | 0.037864864 | 0.102406237 |
| 222968_at   | -0.0820183  | -2.01559433 | 0.04843851  | 0.124364559 |
| 222969_at   | -0.02275358 | -0.67427264 | 0.502790864 | 0.674938555 |
| 222970_at   | -0.06956596 | -2.47679816 | 0.016164618 | 0.051747132 |
| 222971_at   | 0.039787141 | 1.244262261 | 0.218359774 | 0.384922298 |
| 222972_at   | 0.071183666 | 2.022185866 | 0.047732467 | 0.122996967 |
| 222973_at   | 0.016981698 | 0.442457214 | 0.659788165 | 0.794333621 |
| 222974_at   | -0.04958559 | -1.68734953 | 0.09685579  | 0.21242965  |
| 222975_s_at | 0.054510815 | 0.627012727 | 0.533087675 | 0.699984124 |
| 222976_s_at | -0.1884085  | -2.80379352 | 0.00683992  | 0.02554866  |
| 222977_at   | -0.08006718 | -1.55161426 | 0.126142072 | 0.259388124 |
| 222978_at   | 0.149167043 | 2.82258282  | 0.006497461 | 0.02446992  |
| 222979_s_at | -0.11008301 | -2.02173571 | 0.047780401 | 0.123099192 |
| 222980_at   | 0.207572098 | 3.246679134 | 0.001933665 | 0.008858983 |
| 222981_s_at | 0.031866269 | 0.417700489 | 0.677693554 | 0.806698104 |
| 222982_x_at | 0.378243774 | 2.943450484 | 0.004646585 | 0.018570493 |
| 222983_s_at | -0.21149044 | -1.79342149 | 0.078068967 | 0.18008994  |
| 222984_at   | 0.05755555  | 0.769639421 | 0.444606983 | 0.624769265 |
| 222985_at   | -0.51101285 | -5.47071069 | 9.75E-07    | 1.56E-05    |
| 222986_s_at | 0.087966959 | 1.775041542 | 0.081087522 | 0.185606327 |
| 222987_s_at | -0.00297453 | -0.04995606 | 0.960327392 | 0.979774568 |
| 222988_s_at | 0.026247161 | 0.520794638 | 0.60447337  | 0.754802153 |
| 222989_s_at | -0.11011112 | -2.26722484 | 0.027082751 | 0.078454262 |
| 222990_at   | -0.25231948 | -2.6310759  | 0.010860729 | 0.037257269 |

|             |             |             |             |             |
|-------------|-------------|-------------|-------------|-------------|
| 222991_s_at | -0.13163544 | -1.65429204 | 0.103418545 | 0.223296265 |
| 222992_s_at | -0.23450995 | -3.46164987 | 0.001008967 | 0.005133031 |
| 222993_at   | -0.14246405 | -2.61350471 | 0.011372371 | 0.038721165 |
| 222994_at   | 0.038851704 | 0.587825801 | 0.558909064 | 0.720602714 |
| 222995_s_at | -0.46447722 | -4.32410222 | 6.03E-05    | 0.000481303 |
| 222996_s_at | 0.585985125 | 6.457283788 | 2.29E-08    | 8.15E-07    |
| 222997_s_at | -0.03211365 | -0.60175991 | 0.549656447 | 0.712690537 |
| 222998_at   | 0.191704957 | 5.715786719 | 3.89E-07    | 7.39E-06    |
| 222999_s_at | 0.288050181 | 6.757254149 | 7.18E-09    | 3.56E-07    |
| 223000_s_at | 0.418886514 | 4.167069677 | 0.000102994 | 0.000755583 |
| 223001_at   | -0.24289303 | -3.33614521 | 0.001479196 | 0.007085554 |
| 223002_s_at | 0.08829555  | 1.445329622 | 0.153695152 | 0.299397327 |
| 223003_at   | -0.03308015 | -0.8183704  | 0.416463099 | 0.598763674 |
| 223004_s_at | 0.177296266 | 3.191440794 | 0.002276831 | 0.010162403 |
| 223005_s_at | -0.25288426 | -2.76264432 | 0.007648768 | 0.028004109 |
| 223006_s_at | 0.04372778  | 0.624356016 | 0.534818518 | 0.70137355  |
| 223007_s_at | -0.039877   | -0.67577361 | 0.501844161 | 0.674062014 |
| 223008_s_at | -0.16793425 | -2.83485846 | 0.00628234  | 0.023800148 |
| 223009_at   | -0.04745475 | -1.38858099 | 0.170218894 | 0.322717634 |
| 223010_s_at | -0.61851888 | -5.28033676 | 1.98E-06    | 2.81E-05    |
| 223011_s_at | -0.42166155 | -4.73676061 | 1.42E-05    | 0.000143296 |
| 223012_at   | -0.04287004 | -0.93518533 | 0.353532899 | 0.536652919 |
| 223013_at   | 0.035329974 | 0.683944758 | 0.496707412 | 0.669749515 |
| 223014_at   | 0.017075528 | 0.446577348 | 0.656827216 | 0.792284202 |
| 223015_at   | -0.38168174 | -5.33255059 | 1.63E-06    | 2.40E-05    |
| 223016_x_at | -0.05806152 | -1.00005813 | 0.321396488 | 0.503235535 |
| 223017_at   | 0.050983221 | 1.388886917 | 0.170126289 | 0.322624183 |
| 223018_at   | -0.21670592 | -5.50893798 | 8.45E-07    | 1.39E-05    |
| 223019_at   | 0.305961206 | 5.519415047 | 8.13E-07    | 1.35E-05    |
| 223020_at   | -0.13695833 | -2.12151808 | 0.038120419 | 0.102922599 |
| 223021_x_at | -0.29746165 | -3.59467329 | 0.000667096 | 0.003646746 |
| 223022_s_at | -0.12718784 | -2.90492326 | 0.005175366 | 0.020273245 |
| 223023_at   | 0.091604181 | 2.497228706 | 0.015348436 | 0.049577358 |
| 223024_at   | 0.07243942  | 1.145256001 | 0.25676162  | 0.430394956 |
| 223025_s_at | -0.07242746 | -1.77797063 | 0.080600063 | 0.184755954 |
| 223026_s_at | -0.35484551 | -3.95252    | 0.000210745 | 0.00137659  |
| 223027_at   | 0.086536943 | 1.842945254 | 0.070399613 | 0.166391638 |
| 223028_s_at | 0.299624743 | 4.687478144 | 1.70E-05    | 0.000165696 |
| 223029_s_at | -0.06783138 | -2.87637669 | 0.005602559 | 0.021641275 |
| 223030_at   | 0.095740393 | 2.017774725 | 0.048203971 | 0.123905517 |
| 223031_s_at | 0.08371701  | 2.242592133 | 0.028722487 | 0.082233528 |
| 223032_x_at | -0.04737951 | -1.24800515 | 0.216995798 | 0.383149657 |
| 223033_s_at | -0.03579681 | -0.88234497 | 0.381197529 | 0.564009798 |
| 223034_s_at | -0.19996643 | -3.6844444  | 0.000502251 | 0.002876295 |
| 223035_s_at | -0.21413251 | -3.97481439 | 0.000195798 | 0.001293895 |
| 223036_at   | -0.04329069 | -0.84716721 | 0.400350618 | 0.582763137 |
| 223037_at   | -0.05972181 | -1.67325502 | 0.099610918 | 0.21699216  |
| 223038_s_at | -0.05410562 | -1.3168616  | 0.193014684 | 0.352767033 |
| 223039_at   | 0.161909594 | 4.672207693 | 1.79E-05    | 0.0001737   |
| 223040_at   | -0.2480728  | -3.8277942  | 0.000316868 | 0.001949003 |
| 223041_at   | -0.14150829 | -2.42438154 | 0.018440417 | 0.057684547 |
| 223042_s_at | -0.03397534 | -0.66772262 | 0.506933448 | 0.678339761 |
| 223043_at   | -0.22354185 | -2.34929317 | 0.022201969 | 0.067025832 |
| 223044_at   | 0.461449719 | 4.601750134 | 2.30E-05    | 0.000214377 |
| 223045_at   | 0.022475145 | 0.563434885 | 0.575289791 | 0.732774285 |
| 223046_at   | -0.03698009 | -0.60243478 | 0.549210292 | 0.712390608 |
| 223047_at   | 0.328309142 | 3.83585413  | 0.000308686 | 0.001907341 |
| 223048_at   | 0.086416766 | 1.973466342 | 0.053166813 | 0.133823084 |
| 223049_at   | -0.10531896 | -1.96431421 | 0.054244779 | 0.135983154 |
| 223050_s_at | -0.06680165 | -1.75075019 | 0.085225399 | 0.192847681 |
| 223051_at   | -0.11853067 | -2.30468688 | 0.024747728 | 0.073125649 |
| 223052_x_at | -0.07929423 | -2.12421901 | 0.037884514 | 0.102429338 |
| 223053_x_at | -0.21680197 | -4.76191076 | 1.30E-05    | 0.000132709 |
| 223054_at   | 0.025786659 | 0.411512337 | 0.682198999 | 0.809990108 |
| 223055_s_at | -0.15320142 | -4.01700164 | 0.000170262 | 0.001150142 |
| 223056_s_at | -0.03434362 | -1.40020508 | 0.166727439 | 0.317986716 |
| 223057_s_at | -0.07076798 | -2.56954355 | 0.012749962 | 0.042519348 |
| 223058_at   | 0.52382253  | 5.014839703 | 5.23E-06    | 6.25E-05    |
| 223059_s_at | 0.837722825 | 7.39555197  | 6.02E-10    | 6.57E-08    |
| 223060_at   | 0.00798383  | 0.175852294 | 0.861016614 | 0.924302328 |
| 223061_at   | -0.07483113 | -2.30975647 | 0.02444588  | 0.072434879 |
| 223062_s_at | 0.422068315 | 4.837246977 | 9.94E-06    | 0.000106239 |
| 223063_at   | 0.34420115  | 5.797026742 | 2.86E-07    | 5.74E-06    |
| 223064_at   | -0.00592968 | -0.10067098 | 0.920155494 | 0.958070801 |
| 223065_s_at | -0.11081865 | -1.54929411 | 0.126698353 | 0.260184845 |

|             |             |             |             |             |
|-------------|-------------|-------------|-------------|-------------|
| 223066_at   | 0.13101304  | 3.21609813  | 0.00211712  | 0.009560303 |
| 223067_at   | -0.0592432  | -1.00815044 | 0.317529417 | 0.498911008 |
| 223068_at   | -0.05658708 | -1.38059755 | 0.172649201 | 0.326094078 |
| 223069_s_at | -0.07034422 | -2.2720523  | 0.026771289 | 0.077778225 |
| 223070_at   | 0.167161923 | 2.956450945 | 0.004479787 | 0.018025627 |
| 223071_at   | -0.17559112 | -2.55743999 | 0.013154976 | 0.043617642 |
| 223072_s_at | -0.02371602 | -0.74120984 | 0.461527995 | 0.639763319 |
| 223073_at   | 0.065679888 | 1.703847173 | 0.093710644 | 0.207209386 |
| 223074_s_at | 0.059306007 | 1.589698338 | 0.117287045 | 0.245459735 |
| 223075_s_at | 0.410488088 | 3.54923632  | 0.000769077 | 0.00410162  |
| 223076_s_at | 0.253516341 | 3.833409679 | 0.000311146 | 0.001919355 |
| 223077_at   | 0.086648463 | 1.324946336 | 0.190335289 | 0.349169393 |
| 223078_s_at | 0.025417609 | 0.681605343 | 0.498175131 | 0.6712178   |
| 223079_s_at | -0.02369316 | -0.35364831 | 0.724872395 | 0.839210366 |
| 223080_at   | -0.08250088 | -2.3983715  | 0.019673205 | 0.060771004 |
| 223081_at   | -0.07386243 | -2.2455472  | 0.028521252 | 0.081798871 |
| 223082_at   | 0.056639814 | 1.192862152 | 0.237733688 | 0.407189437 |
| 223083_s_at | -0.08550429 | -2.93316944 | 0.004782556 | 0.019017884 |
| 223084_s_at | -0.32764613 | -3.75316315 | 0.000403188 | 0.00238758  |
| 223085_at   | 0.796552948 | 6.283854956 | 4.46E-08    | 1.35E-06    |
| 223086_x_at | -0.05012186 | -1.03224264 | 0.306202382 | 0.486311188 |
| 223087_at   | -0.05561818 | -0.72894727 | 0.468938995 | 0.645781979 |
| 223088_x_at | -0.10336888 | -1.99156758 | 0.05108877  | 0.129636888 |
| 223089_at   | -0.25051895 | -3.44441834 | 0.001063865 | 0.005365184 |
| 223090_x_at | -0.04475295 | -0.5672111  | 0.57273855  | 0.730878627 |
| 223091_x_at | -0.05584398 | -0.75350009 | 0.454168056 | 0.633372196 |
| 223092_at   | -0.15118179 | -2.53955232 | 0.013774926 | 0.04530348  |
| 223093_at   | -0.36326769 | -3.71002332 | 0.000462925 | 0.0026841   |
| 223094_s_at | -0.12052442 | -2.41846947 | 0.018714376 | 0.058361795 |
| 223095_at   | 0.025183686 | 0.717314207 | 0.476031552 | 0.65198131  |
| 223096_at   | -0.0291024  | -0.49439296 | 0.622878111 | 0.768402024 |
| 223097_at   | 0.173846364 | 4.543197635 | 2.82E-05    | 0.000254525 |
| 223098_s_at | -0.06545482 | -0.82809582 | 0.410978092 | 0.593225015 |
| 223099_s_at | 0.051759186 | 0.841359597 | 0.403568819 | 0.585917475 |
| 223100_s_at | 0.201600396 | 3.775370713 | 0.000375389 | 0.002245901 |
| 223101_s_at | -0.31086332 | -4.82625692 | 1.03E-05    | 0.00010976  |
| 223103_at   | -0.101342   | -1.80062142 | 0.076912373 | 0.178055828 |
| 223104_at   | -0.08001579 | -1.96101654 | 0.054637747 | 0.136807114 |
| 223105_s_at | 0.15940329  | 2.610676049 | 0.011456758 | 0.038963963 |
| 223106_at   | 0.251400236 | 3.302127291 | 0.001638611 | 0.007723348 |
| 223107_s_at | -0.01055583 | -0.24351742 | 0.808455565 | 0.892334002 |
| 223108_s_at | -0.06578365 | -1.8469553  | 0.069807349 | 0.16536786  |
| 223109_at   | 0.031078711 | 0.523182108 | 0.602821458 | 0.753757061 |
| 223110_at   | 0.17201913  | 5.880173225 | 2.09E-07    | 4.47E-06    |
| 223111_x_at | 0.037960345 | 1.392342878 | 0.169082859 | 0.321194364 |
| 223112_s_at | -0.36201931 | -5.00197496 | 5.48E-06    | 6.49E-05    |
| 223113_at   | 0.223829266 | 3.42795881  | 0.001118941 | 0.005593078 |
| 223114_at   | 0.077785971 | 1.514809154 | 0.135199477 | 0.272951933 |
| 223115_at   | -0.05473251 | -1.73406877 | 0.088167223 | 0.197869315 |
| 223116_at   | 0.085421627 | 2.45903385  | 0.016905864 | 0.053705213 |
| 223117_s_at | 0.216830503 | 4.522350238 | 3.03E-05    | 0.000270902 |
| 223118_s_at | 0.118015081 | 2.068576775 | 0.043009907 | 0.113290431 |
| 223119_s_at | 0.241927105 | 5.768332252 | 3.19E-07    | 6.29E-06    |
| 223120_at   | 0.109089255 | 2.381552    | 0.0205092   | 0.062840886 |
| 223121_s_at | 0.247253669 | 3.334632901 | 0.00148596  | 0.007107291 |
| 223122_s_at | 0.562005427 | 3.193897594 | 0.002260424 | 0.010106633 |
| 223123_s_at | -0.14859641 | -2.21491591 | 0.030668878 | 0.086613176 |
| 223124_s_at | -0.13233352 | -1.6763666  | 0.098997228 | 0.215907871 |
| 223125_s_at | 0.176563438 | 3.002719678 | 0.003930248 | 0.016160698 |
| 223126_s_at | 0.077376261 | 1.736455206 | 0.087741287 | 0.197260105 |
| 223127_s_at | -0.11426918 | -2.92566095 | 0.004884183 | 0.019351409 |
| 223128_at   | -0.0270599  | -0.8229069  | 0.413899079 | 0.596151265 |
| 223129_x_at | 0.21082369  | 3.897985186 | 0.000252083 | 0.001604398 |
| 223130_s_at | 0.26374731  | 4.063843683 | 0.000145672 | 0.001009985 |
| 223131_s_at | -0.19282657 | -2.60686478 | 0.011571361 | 0.039296904 |
| 223132_s_at | 0.126136677 | 2.285226955 | 0.025937362 | 0.075913069 |
| 223133_at   | -0.10928905 | -1.67166091 | 0.099926524 | 0.217488858 |
| 223134_at   | 0.607019793 | 6.914690701 | 3.90E-09    | 2.32E-07    |
| 223135_s_at | 0.145485712 | 4.59401052  | 2.36E-05    | 0.000219247 |
| 223136_at   | 0.104421944 | 1.702732404 | 0.093920486 | 0.20761175  |
| 223137_at   | -0.03551571 | -1.04976992 | 0.298136541 | 0.477266219 |
| 223138_s_at | -0.09094461 | -1.51994212 | 0.133906194 | 0.270977388 |
| 223139_s_at | -0.2091465  | -3.04528624 | 0.003480771 | 0.014582707 |
| 223140_s_at | -0.25559957 | -4.06785431 | 0.000143734 | 0.000998405 |
| 223141_at   | 0.141276172 | 4.363390912 | 5.27E-05    | 0.000430994 |

|             |             |             |             |             |
|-------------|-------------|-------------|-------------|-------------|
| 223142_s_at | 0.007894761 | 0.228579485 | 0.819992036 | 0.899756545 |
| 223143_s_at | -0.28983947 | -4.83265287 | 1.01E-05    | 0.000107773 |
| 223144_s_at | -0.04718432 | -0.87126774 | 0.387165551 | 0.569840369 |
| 223145_s_at | -0.43063627 | -4.78693066 | 1.19E-05    | 0.000123131 |
| 223146_at   | -0.0015295  | -0.04110349 | 0.967353202 | 0.98341468  |
| 223147_s_at | 0.035290332 | 0.806543658 | 0.4231926   | 0.604960674 |
| 223148_at   | -0.04140724 | -1.29338296 | 0.200956894 | 0.363084643 |
| 223149_s_at | -0.04880726 | -1.22387888 | 0.225898861 | 0.393425078 |
| 223150_s_at | 0.031643288 | 1.14434677  | 0.257135305 | 0.430878365 |
| 223151_at   | 0.004532128 | 0.098605603 | 0.921788142 | 0.959063104 |
| 223152_at   | -0.12145682 | -3.3116478  | 0.001592433 | 0.007535099 |
| 223153_x_at | 0.042879552 | 1.490959768 | 0.141338772 | 0.281920575 |
| 223154_at   | -0.17967032 | -2.84562974 | 0.006099018 | 0.023221785 |
| 223155_at   | 0.202058209 | 3.164856859 | 0.002461666 | 0.010851921 |
| 223156_at   | -0.26394027 | -3.11099149 | 0.00288016  | 0.012399589 |
| 223157_at   | -0.18192565 | -4.29117168 | 6.75E-05    | 0.000528997 |
| 223158_s_at | 0.166474339 | 2.100444215 | 0.04000545  | 0.106869312 |
| 223159_s_at | 0.04570311  | 0.776631937 | 0.440501398 | 0.62092957  |
| 223160_s_at | 0.197431007 | 4.079069188 | 0.000138445 | 0.000969658 |
| 223161_at   | 0.117216222 | 1.477246862 | 0.144967022 | 0.287094702 |
| 223162_s_at | -0.09259537 | -1.8492622  | 0.069468536 | 0.164818591 |
| 223163_s_at | 0.005065236 | 0.18323349  | 0.855247693 | 0.920807754 |
| 223164_at   | -0.43521278 | -5.5998883  | 6.01E-07    | 1.05E-05    |
| 223165_s_at | 0.163582598 | 2.820657032 | 0.006531819 | 0.024574465 |
| 223166_x_at | -0.16372383 | -3.89160529 | 0.0002574   | 0.001633356 |
| 223167_s_at | -0.29332122 | -5.20852723 | 2.58E-06    | 3.49E-05    |
| 223168_at   | 0.311124656 | 2.98246625  | 0.004162587 | 0.016953829 |
| 223169_s_at | -0.08531716 | -0.6311161  | 0.530420054 | 0.697672996 |
| 223170_at   | 0.128264412 | 1.19763411  | 0.235884196 | 0.405024764 |
| 223171_at   | -0.0931862  | -2.04044715 | 0.0458226   | 0.119230532 |
| 223172_s_at | 0.030455599 | 0.848544331 | 0.399589836 | 0.581928536 |
| 223173_at   | 0.099400101 | 4.069199821 | 0.000143089 | 0.000995475 |
| 223174_at   | -0.54132487 | -5.75801508 | 3.31E-07    | 6.49E-06    |
| 223175_s_at | -0.067754   | -1.93818165 | 0.057426246 | 0.14212503  |
| 223176_at   | 0.276912277 | 2.921833064 | 0.00493676  | 0.019519923 |
| 223177_at   | 0.009048588 | 0.1009934   | 0.919900655 | 0.957879778 |
| 223178_s_at | 0.063129025 | 0.741453164 | 0.461381623 | 0.639659619 |
| 223179_at   | 0.026881113 | 0.525012297 | 0.601556547 | 0.752842687 |
| 223180_s_at | -0.11000402 | -2.2164868  | 0.030555368 | 0.086358092 |
| 223181_at   | -0.08945898 | -1.81913178 | 0.074004485 | 0.172882106 |
| 223182_s_at | 0.121869201 | 1.781699696 | 0.079983006 | 0.183670769 |
| 223183_at   | -0.12736035 | -2.17332969 | 0.033811936 | 0.093684007 |
| 223184_s_at | -0.10857179 | -2.25563265 | 0.027843801 | 0.0801801   |
| 223185_s_at | 0.071859712 | 0.903176405 | 0.370132181 | 0.553371941 |
| 223186_at   | 0.097799934 | 2.175573415 | 0.033635408 | 0.093299009 |
| 223187_s_at | -0.18971383 | -3.22251138 | 0.002077341 | 0.009410146 |
| 223188_at   | 0.077675113 | 2.903049107 | 0.005202459 | 0.020350836 |
| 223189_x_at | 0.135606109 | 2.270556281 | 0.026867469 | 0.077956303 |
| 223190_s_at | 0.190465625 | 3.172914212 | 0.002404207 | 0.010630078 |
| 223191_at   | -0.07728993 | -1.25894328 | 0.213045798 | 0.378360533 |
| 223192_at   | 0.099786967 | 2.652832071 | 0.010256336 | 0.035579825 |
| 223193_x_at | -0.32014876 | -4.37837499 | 5.00E-05    | 0.00041215  |
| 223194_s_at | 0.183644428 | 2.734309352 | 0.008255893 | 0.029852133 |
| 223195_s_at | 0.131302384 | 3.680900634 | 0.000507945 | 0.002904437 |
| 223196_s_at | 0.014605423 | 0.392653135 | 0.696001177 | 0.820038084 |
| 223197_s_at | -0.03791199 | -0.94184687 | 0.350139948 | 0.53325795  |
| 223198_x_at | 0.034397459 | 0.986539525 | 0.327926717 | 0.510438173 |
| 223199_at   | 0.169452418 | 2.99458611  | 0.004022063 | 0.016462499 |
| 223200_s_at | 0.099446089 | 2.347125157 | 0.022320084 | 0.067273346 |
| 223201_s_at | -0.01669553 | -0.37256309 | 0.71081853  | 0.830164417 |
| 223202_s_at | -0.0128328  | -0.28171396 | 0.779155892 | 0.873674264 |
| 223203_at   | 0.026946007 | 0.787428077 | 0.434206541 | 0.61493674  |
| 223204_at   | 0.659389375 | 5.794609345 | 2.89E-07    | 5.79E-06    |
| 223205_s_at | -0.07103059 | -3.17070719 | 0.00241982  | 0.010689711 |
| 223206_s_at | 0.004931873 | 0.074537401 | 0.940836794 | 0.96917586  |
| 223207_x_at | -0.00588562 | -0.110159   | 0.912659897 | 0.953762244 |
| 223208_at   | 0.083241258 | 2.204452861 | 0.031434443 | 0.088378719 |
| 223209_s_at | 0.180938364 | 2.290001977 | 0.025640849 | 0.075202837 |
| 223210_at   | 0.251521586 | 2.65736304  | 0.010134393 | 0.035260665 |
| 223211_at   | 0.005626333 | 0.097761411 | 0.922455561 | 0.959400152 |
| 223212_at   | -0.1653839  | -3.6233078  | 0.000609595 | 0.00338183  |
| 223213_s_at | 0.207854553 | 2.998947279 | 0.003972587 | 0.016306286 |
| 223214_s_at | 0.220868223 | 3.20197441  | 0.002207265 | 0.009906314 |
| 223215_s_at | -0.03535261 | -0.36919482 | 0.713313983 | 0.831687891 |
| 223216_x_at | 0.312228852 | 5.281911261 | 1.97E-06    | 2.79E-05    |

|             |             |             |             |             |
|-------------|-------------|-------------|-------------|-------------|
| 223217_s_at | 0.138188138 | 2.176147884 | 0.033590341 | 0.093197138 |
| 223218_s_at | 0.262182556 | 2.234337492 | 0.029291271 | 0.083524883 |
| 223219_s_at | -0.03321298 | -1.02940827 | 0.307520538 | 0.487877684 |
| 223220_s_at | 0.289880236 | 3.871562369 | 0.000274816 | 0.001727434 |
| 223221_at   | -0.12479354 | -2.74039649 | 0.008121852 | 0.029449251 |
| 223222_at   | 0.028620155 | 0.964874317 | 0.338575128 | 0.521275996 |
| 223223_at   | -0.24400592 | -5.65442036 | 4.90E-07    | 8.89E-06    |
| 223225_s_at | -0.15230001 | -4.55215981 | 2.73E-05    | 0.000248356 |
| 223226_x_at | -0.30642059 | -6.05363187 | 1.08E-07    | 2.68E-06    |
| 223227_at   | 0.178095106 | 2.505644666 | 0.015023186 | 0.048667457 |
| 223228_at   | -0.04759615 | -1.19365832 | 0.237424387 | 0.40685509  |
| 223229_at   | -0.38221236 | -6.32695121 | 3.78E-08    | 1.19E-06    |
| 223230_at   | 0.240583803 | 5.450130523 | 1.05E-06    | 1.66E-05    |
| 223231_at   | -0.12163375 | -1.62658833 | 0.109193742 | 0.232628789 |
| 223232_s_at | 0.113387099 | 3.131939597 | 0.002710057 | 0.011799112 |
| 223233_s_at | 0.049570835 | 1.561903565 | 0.123698578 | 0.25543302  |
| 223234_at   | -0.0548     | -1.40711985 | 0.16467684  | 0.315030276 |
| 223235_s_at | -0.54387015 | -4.39058052 | 4.80E-05    | 0.000397627 |
| 223236_at   | 0.287137226 | 4.575333979 | 2.52E-05    | 0.0002323   |
| 223237_x_at | -0.12659451 | -4.2471835  | 7.85E-05    | 0.000601334 |
| 223238_s_at | 0.272381866 | 5.398528607 | 1.28E-06    | 1.94E-05    |
| 223239_at   | -0.71229347 | -6.37001106 | 3.21E-08    | 1.05E-06    |
| 223240_at   | 0.326006151 | 5.849957608 | 2.34E-07    | 4.88E-06    |
| 223241_at   | 0.004627919 | 0.105491356 | 0.91634641  | 0.955559143 |
| 223242_s_at | 0.032263822 | 0.734950076 | 0.465302733 | 0.643127046 |
| 223243_s_at | 0.114508275 | 1.804046426 | 0.076367229 | 0.177032179 |
| 223244_s_at | -0.29996922 | -4.53937575 | 2.86E-05    | 0.000257541 |
| 223245_at   | -0.21557628 | -5.44602789 | 1.07E-06    | 1.68E-05    |
| 223246_s_at | -0.21398013 | -4.04001759 | 0.000157717 | 0.00107844  |
| 223247_at   | -0.02168065 | -0.53811556 | 0.5925365   | 0.745982739 |
| 223248_at   | -0.14346533 | -2.59132896 | 0.012049386 | 0.040620891 |
| 223249_at   | -0.2231638  | -3.41717834 | 0.001156468 | 0.005751069 |
| 223250_at   | -0.33131298 | -5.2490008  | 2.22E-06    | 3.09E-05    |
| 223251_s_at | 0.394570724 | 4.669477171 | 1.81E-05    | 0.000175123 |
| 223252_at   | 0.016961283 | 0.576029366 | 0.5668024   | 0.726789833 |
| 223253_at   | -0.07386212 | -0.78225108 | 0.437218392 | 0.617753608 |
| 223254_s_at | -0.15480612 | -3.26610604 | 0.001825013 | 0.008450425 |
| 223255_at   | -0.23815431 | -3.54320047 | 0.000783692 | 0.004161688 |
| 223256_at   | -0.27347436 | -4.60656488 | 2.26E-05    | 0.000211434 |
| 223257_at   | -0.42187412 | -6.20973257 | 5.93E-08    | 1.68E-06    |
| 223258_s_at | -0.27531316 | -5.92564383 | 1.76E-07    | 3.90E-06    |
| 223259_at   | 0.027616891 | 1.038613958 | 0.303253377 | 0.483017924 |
| 223260_s_at | -0.1610106  | -3.29804473 | 0.001658797 | 0.007795474 |
| 223261_at   | 0.169910702 | 2.656262386 | 0.010163893 | 0.035336033 |
| 223262_s_at | 0.024320814 | 0.82923717  | 0.410337283 | 0.592557979 |
| 223263_s_at | -0.04316651 | -0.50799272 | 0.613366451 | 0.76163241  |
| 223264_at   | -0.66874762 | -7.25331818 | 1.05E-09    | 9.60E-08    |
| 223265_at   | 0.041753187 | 1.14149151  | 0.258311305 | 0.432198302 |
| 223266_at   | 0.164205947 | 4.158853183 | 0.000105891 | 0.000773155 |
| 223267_at   | -0.12049224 | -2.64403768 | 0.010496851 | 0.036262292 |
| 223268_at   | 0.209666258 | 3.221946748 | 0.002080814 | 0.009422062 |
| 223269_at   | 0.124559492 | 2.797325396 | 0.006961607 | 0.025927176 |
| 223270_at   | 0.028900981 | 0.968903259 | 0.33657786  | 0.519366704 |
| 223271_s_at | -0.06727825 | -0.9474738  | 0.347290528 | 0.530327955 |
| 223272_s_at | -0.20256683 | -2.8900256  | 0.00539439  | 0.020967653 |
| 223273_at   | -0.01138365 | -0.12603765 | 0.900133808 | 0.946626354 |
| 223274_at   | 0.038749055 | 1.220412534 | 0.22719968  | 0.394767922 |
| 223275_at   | -0.1891442  | -2.76686161 | 0.007561999 | 0.027754031 |
| 223276_at   | 0.178791979 | 2.665442819 | 0.009920222 | 0.034661446 |
| 223277_at   | -0.0019414  | -0.05584046 | 0.95565897  | 0.977218476 |
| 223278_at   | -0.04948542 | -0.94134353 | 0.350395576 | 0.533520002 |
| 223279_s_at | 0.3366009   | 7.053585734 | 2.27E-09    | 1.60E-07    |
| 223280_x_at | 0.160356336 | 1.848588599 | 0.069567323 | 0.164977748 |
| 223281_s_at | 0.30128602  | 5.132183162 | 3.41E-06    | 4.40E-05    |
| 223282_at   | -0.21146694 | -3.25230831 | 0.001901571 | 0.008744214 |
| 223283_s_at | -0.1682098  | -2.55470939 | 0.013247947 | 0.043883578 |
| 223284_at   | -0.1135954  | -2.49044563 | 0.015615193 | 0.050279122 |
| 223285_s_at | 0.083583098 | 2.490791114 | 0.015601506 | 0.050242291 |
| 223286_at   | -0.09708881 | -3.7979703  | 0.000348991 | 0.002111995 |
| 223287_s_at | -0.58123958 | -7.16649336 | 1.47E-09    | 1.19E-07    |
| 223288_at   | 0.110390344 | 1.272631082 | 0.20817816  | 0.372230379 |
| 223289_s_at | -0.05348148 | -0.89169409 | 0.376205874 | 0.558937299 |
| 223290_at   | -0.57769647 | -5.95578804 | 1.57E-07    | 3.57E-06    |
| 223291_at   | -0.09118778 | -2.9438201  | 0.004641764 | 0.018557517 |
| 223292_s_at | -0.08929367 | -2.49546855 | 0.015417259 | 0.049774482 |

|             |             |             |             |             |
|-------------|-------------|-------------|-------------|-------------|
| 223293_at   | -0.09412843 | -2.48735209 | 0.015738236 | 0.050598751 |
| 223294_at   | 0.013413582 | 0.237757496 | 0.812899009 | 0.894899535 |
| 223295_s_at | 0.210227634 | 4.3993049   | 4.66E-05    | 0.000387681 |
| 223296_at   | 0.039585658 | 0.374276978 | 0.709549974 | 0.829224607 |
| 223297_at   | 0.166774143 | 3.96592724  | 0.00020163  | 0.001326148 |
| 223298_s_at | -0.14491187 | -2.42238546 | 0.018532508 | 0.05789557  |
| 223299_at   | 0.07918527  | 0.96544857  | 0.338289977 | 0.521078045 |
| 223300_s_at | 0.129781191 | 1.771749209 | 0.08163836  | 0.186553889 |
| 223301_s_at | 0.154147685 | 2.620099034 | 0.011177837 | 0.038169307 |
| 223302_s_at | -0.07158399 | -1.76887039 | 0.082122561 | 0.187267771 |
| 223303_at   | 0.10422006  | 1.972012901 | 0.053336768 | 0.134143322 |
| 223304_at   | -0.19369544 | -3.99513407 | 0.000183069 | 0.001224074 |
| 223305_at   | 0.16323242  | 4.908480874 | 7.69E-06    | 8.59E-05    |
| 223306_at   | 0.170435332 | 2.420899729 | 0.018601321 | 0.058078123 |
| 223307_at   | -0.01056147 | -0.25007083 | 0.803407696 | 0.88937622  |
| 223308_s_at | -0.10837588 | -3.26048798 | 0.001855828 | 0.008576226 |
| 223309_x_at | 0.103024383 | 1.656219247 | 0.103026236 | 0.222641483 |
| 223310_x_at | 0.08146503  | 1.202422469 | 0.234038865 | 0.402914674 |
| 223311_s_at | 0.031235505 | 1.062492467 | 0.292373752 | 0.470840579 |
| 223312_at   | -0.02244089 | -0.795611   | 0.429471075 | 0.610467608 |
| 223313_s_at | -0.20352996 | -2.83316305 | 0.006311655 | 0.023892975 |
| 223314_at   | 0.023571367 | 0.679289911 | 0.499630129 | 0.672371868 |
| 223315_at   | 0.102356181 | 1.852741568 | 0.068960143 | 0.16386467  |
| 223316_at   | -0.23365945 | -5.95463346 | 1.57E-07    | 3.58E-06    |
| 223317_at   | 0.009621606 | 0.187917989 | 0.85159052  | 0.918571751 |
| 223318_s_at | -0.22371526 | -3.37278628 | 0.001323935 | 0.006452485 |
| 223319_at   | -0.27479906 | -4.16796246 | 0.000102684 | 0.000753926 |
| 223320_s_at | -0.10398465 | -1.77788505 | 0.08061427  | 0.184778591 |
| 223321_s_at | 0.255317144 | 4.365796633 | 5.23E-05    | 0.00042814  |
| 223322_at   | 0.015688934 | 0.437784655 | 0.663152741 | 0.796710277 |
| 223323_x_at | -0.04079823 | -1.27656134 | 0.206795887 | 0.370425722 |
| 223324_s_at | 0.047264598 | 1.135810196 | 0.260662641 | 0.434966489 |
| 223325_at   | 0.044641521 | 1.644813723 | 0.105365746 | 0.226514307 |
| 223326_s_at | 0.111045429 | 2.316785072 | 0.024032805 | 0.07147586  |
| 223327_x_at | -0.03375847 | -0.98443141 | 0.328952956 | 0.511412165 |
| 223328_at   | -0.21273556 | -2.99884742 | 0.003973713 | 0.016309412 |
| 223329_x_at | 0.143651595 | 2.549228163 | 0.01343637  | 0.044399132 |
| 223330_s_at | 0.025814997 | 0.39364962  | 0.695269255 | 0.819424614 |
| 223331_s_at | -0.09572974 | -1.94462362 | 0.056627546 | 0.140636435 |
| 223332_x_at | -0.0750104  | -1.91432606 | 0.060468129 | 0.147981689 |
| 223333_s_at | 0.160424961 | 1.258556836 | 0.213184439 | 0.378507554 |
| 223334_at   | -0.21621575 | -2.73138648 | 0.008320974 | 0.030046132 |
| 223335_at   | 0.036874047 | 0.662120837 | 0.510490865 | 0.681365958 |
| 223336_s_at | -0.11099833 | -1.42346677 | 0.159906609 | 0.308217937 |
| 223337_at   | 0.026518614 | 0.633184609 | 0.52907795  | 0.696584231 |
| 223338_s_at | -0.32362124 | -4.91568591 | 7.49E-06    | 8.42E-05    |
| 223339_at   | -0.01972006 | -0.32848053 | 0.743719971 | 0.85150078  |
| 223340_at   | -0.48111759 | -5.67918543 | 4.46E-07    | 8.25E-06    |
| 223341_s_at | -0.58721795 | -3.83549657 | 0.000309045 | 0.001908501 |
| 223342_at   | 0.139054235 | 2.370490844 | 0.021076164 | 0.064252109 |
| 223343_at   | 0.46131729  | 3.577176842 | 0.000704738 | 0.003815154 |
| 223344_s_at | 0.0822364   | 1.508215944 | 0.136875179 | 0.275389434 |
| 223345_at   | 0.046332204 | 1.387664385 | 0.170496582 | 0.323148143 |
| 223346_at   | 0.049102608 | 1.504535757 | 0.137817642 | 0.276776896 |
| 223347_at   | -4.02E-05   | -0.00091311 | 0.99927455  | 0.99961005  |
| 223348_x_at | 0.055263235 | 1.418417664 | 0.161368424 | 0.310249667 |
| 223349_s_at | 0.499651177 | 4.178596152 | 9.91E-05    | 0.000730911 |
| 223350_x_at | -0.08736933 | -1.95911753 | 0.054865146 | 0.137207381 |
| 223351_at   | 0.136593341 | 5.158044865 | 3.10E-06    | 4.07E-05    |
| 223352_s_at | -0.04030134 | -1.37255861 | 0.175123209 | 0.329444226 |
| 223353_at   | 0.150426593 | 3.603213349 | 0.000649426 | 0.003566937 |
| 223354_x_at | -0.07945888 | -0.94092431 | 0.350608574 | 0.533777134 |
| 223355_at   | 0.013277321 | 0.429195229 | 0.669355918 | 0.80084478  |
| 223356_s_at | 0.122562081 | 2.935185646 | 0.004755603 | 0.018924175 |
| 223357_s_at | -0.04922333 | -1.45171825 | 0.151916053 | 0.296940414 |
| 223358_s_at | 0.207286841 | 3.25820553  | 0.001868487 | 0.008621352 |
| 223359_s_at | -0.05615485 | -1.59310028 | 0.116521021 | 0.244188197 |
| 223360_at   | -0.21316439 | -2.65498223 | 0.010198302 | 0.035430855 |
| 223361_at   | -0.43534986 | -4.66281665 | 1.85E-05    | 0.000178838 |
| 223362_s_at | -0.50146404 | -6.24300482 | 5.22E-08    | 1.52E-06    |
| 223363_at   | 0.032907817 | 0.691620675 | 0.491908296 | 0.665917243 |
| 223364_s_at | 0.076780521 | 2.538370078 | 0.013816818 | 0.045423768 |
| 223365_at   | 0.068834628 | 2.007029351 | 0.049369362 | 0.126225144 |
| 223366_at   | 0.169281421 | 3.32298329  | 0.001539054 | 0.007318163 |
| 223367_at   | -0.13740848 | -3.00454419 | 0.003909922 | 0.016087481 |

|             |             |             |             |             |
|-------------|-------------|-------------|-------------|-------------|
| 223368_s_at | -0.01468451 | -0.3711433  | 0.71187002  | 0.830724696 |
| 223369_at   | -0.13010416 | -3.40999951 | 0.001182116 | 0.005859706 |
| 223370_at   | -0.11145233 | -2.19774226 | 0.031934253 | 0.089541729 |
| 223371_s_at | -0.00966435 | -0.29501758 | 0.769023762 | 0.867753094 |
| 223372_at   | -0.00723769 | -0.72059289 | 0.47402649  | 0.650051915 |
| 223373_s_at | -0.0988274  | -3.21182055 | 0.002144049 | 0.009663358 |
| 223374_s_at | -0.5715706  | -5.07133081 | 4.26E-06    | 5.28E-05    |
| 223375_at   | -0.04287062 | -1.46870431 | 0.147264009 | 0.290344235 |
| 223376_s_at | -0.02037588 | -0.3612557  | 0.719208271 | 0.835682501 |
| 223377_x_at | -0.01358827 | -0.35960933 | 0.720432754 | 0.836387694 |
| 223378_at   | 0.414045332 | 5.522389546 | 8.04E-07    | 1.34E-05    |
| 223379_s_at | -0.01323368 | -0.51163871 | 0.610827671 | 0.759807127 |
| 223380_s_at | 0.641806144 | 6.082145916 | 9.67E-08    | 2.46E-06    |
| 223381_at   | 0.028269693 | 1.094462514 | 0.278233038 | 0.455003262 |
| 223382_s_at | -0.12120246 | -3.47728643 | 0.000961487 | 0.004936331 |
| 223383_at   | -0.14875273 | -3.43816119 | 0.001084492 | 0.005445246 |
| 223384_s_at | 0.200689386 | 3.193814081 | 0.00226098  | 0.010106793 |
| 223385_at   | 0.021507536 | 0.525991832 | 0.600880059 | 0.752328831 |
| 223386_at   | -0.11802443 | -2.51818161 | 0.014550213 | 0.047361843 |
| 223387_at   | 0.084765232 | 3.124117284 | 0.002772444 | 0.012022712 |
| 223388_s_at | -0.02287673 | -0.57024804 | 0.570690772 | 0.729195477 |
| 223389_s_at | 0.016919318 | 0.491560565 | 0.624867306 | 0.770069479 |
| 223390_at   | -0.00501091 | -0.14849145 | 0.882465035 | 0.937091377 |
| 223391_at   | -0.03253879 | -0.44915744 | 0.654975834 | 0.790968979 |
| 223392_s_at | -0.03683327 | -1.35938048 | 0.179237395 | 0.334984219 |
| 223393_s_at | -0.0068342  | -0.20109329 | 0.841322395 | 0.912785679 |
| 223394_at   | 0.146653648 | 2.942096107 | 0.004664289 | 0.018626544 |
| 223395_at   | 0.656982327 | 4.968404431 | 6.19E-06    | 7.18E-05    |
| 223396_at   | -0.05375119 | -1.89367969 | 0.063210349 | 0.153224326 |
| 223397_s_at | 0.067008388 | 2.368429784 | 0.021183343 | 0.064548031 |
| 223398_at   | 0.152460096 | 3.451479216 | 0.001041035 | 0.005271465 |
| 223399_x_at | -0.02430474 | -0.80021565 | 0.426819946 | 0.608059578 |
| 223400_s_at | 0.015137062 | 0.471597709 | 0.638966174 | 0.780535622 |
| 223401_at   | -0.01199583 | -0.29189348 | 0.771399535 | 0.869158427 |
| 223402_at   | -0.04738626 | -1.48524917 | 0.142840928 | 0.284067402 |
| 223403_s_at | 0.044843084 | 0.97837161  | 0.331914777 | 0.514406325 |
| 223404_s_at | 0.060029619 | 1.299961506 | 0.198707265 | 0.360064266 |
| 223405_at   | 0.366586241 | 4.808937676 | 1.10E-05    | 0.000115463 |
| 223406_x_at | -0.05297988 | -1.37989538 | 0.172864222 | 0.326320921 |
| 223407_at   | 0.244304997 | 4.655404705 | 1.90E-05    | 0.00018292  |
| 223408_s_at | -0.00209669 | -0.05703218 | 0.954713695 | 0.976721173 |
| 223409_at   | 0.013807795 | 0.352242242 | 0.725920995 | 0.839909388 |
| 223410_s_at | -0.04994947 | -1.52069556 | 0.133717191 | 0.270742024 |
| 223411_at   | 0.322196955 | 5.926290084 | 1.75E-07    | 3.89E-06    |
| 223412_at   | 0.000441551 | 0.007645301 | 0.993925975 | 0.997225798 |
| 223413_s_at | 0.069720104 | 1.725860993 | 0.089645236 | 0.200411428 |
| 223414_s_at | 0.031736384 | 1.052799788 | 0.296757125 | 0.475806764 |
| 223415_at   | -0.02638107 | -0.46027509 | 0.647023169 | 0.785888285 |
| 223416_at   | 0.050605117 | 0.789695994 | 0.432891004 | 0.613754354 |
| 223417_at   | -0.04634196 | -2.38281816 | 0.020445178 | 0.0626748   |
| 223418_x_at | -0.1134487  | -1.33428444 | 0.187275591 | 0.345254762 |
| 223419_at   | 0.112141502 | 3.609606322 | 0.000636492 | 0.003508834 |
| 223420_at   | -0.02473539 | -0.74070444 | 0.461832109 | 0.639989512 |
| 223421_at   | 0.095210054 | 3.542244091 | 0.000786032 | 0.004170645 |
| 223422_s_at | 0.057568568 | 1.555810418 | 0.125140956 | 0.257803982 |
| 223423_at   | -0.14456699 | -3.15781867 | 0.002512909 | 0.01104622  |
| 223424_s_at | 0.168058913 | 4.625325871 | 2.11E-05    | 0.000200203 |
| 223425_at   | 0.202601969 | 6.806422582 | 5.94E-09    | 3.11E-07    |
| 223426_s_at | -0.02479841 | -0.68699682 | 0.494796146 | 0.668301532 |
| 223427_s_at | 0.00750602  | 0.266350553 | 0.790904753 | 0.880859132 |
| 223428_s_at | 0.035996786 | 0.943636412 | 0.349232097 | 0.532346225 |
| 223429_x_at | 0.074326505 | 1.92070088  | 0.059642138 | 0.146320822 |
| 223430_at   | 0.063230706 | 1.217607569 | 0.228256305 | 0.395701053 |
| 223431_at   | -0.12799361 | -2.86072505 | 0.00585041  | 0.022426152 |
| 223432_at   | -0.13239449 | -4.00710192 | 0.000175949 | 0.001182304 |
| 223433_at   | -0.0819078  | -1.52065727 | 0.13372679  | 0.270749194 |
| 223434_at   | 0.779459953 | 3.673962059 | 0.000519273 | 0.00295748  |
| 223435_s_at | -0.4452714  | -6.04631032 | 1.11E-07    | 2.73E-06    |
| 223436_s_at | 0.02003696  | 0.609159168 | 0.544774817 | 0.709103717 |
| 223437_at   | 0.440046324 | 7.365031801 | 6.78E-10    | 7.16E-08    |
| 223438_s_at | 0.142210352 | 3.223667319 | 0.002070246 | 0.009381812 |
| 223439_at   | 0.05044492  | 1.38043492  | 0.172698984 | 0.326171342 |
| 223440_at   | 0.046306134 | 1.074248213 | 0.287117517 | 0.46531008  |
| 223441_at   | -0.03065258 | -0.5573738  | 0.579396195 | 0.736032937 |
| 223442_at   | -0.14167013 | -2.62622792 | 0.010999756 | 0.037646138 |



|             |             |             |             |             |
|-------------|-------------|-------------|-------------|-------------|
| 223443_s_at | -0.16512629 | -1.99833624 | 0.050329839 | 0.128138382 |
| 223444_at   | 0.195342992 | 3.619235309 | 0.000617474 | 0.003420022 |
| 223445_at   | -0.46494623 | -5.3349947  | 1.61E-06    | 2.38E-05    |
| 223446_s_at | -0.58332317 | -5.46361273 | 1.00E-06    | 1.60E-05    |
| 223447_at   | 0.004018378 | 0.112265384 | 0.910996893 | 0.952978153 |
| 223448_x_at | -0.0919132  | -2.54255261 | 0.013669129 | 0.045008525 |
| 223449_at   | 0.214561964 | 4.433849958 | 4.13E-05    | 0.000351081 |
| 223450_s_at | 0.024160082 | 0.504559704 | 0.615761296 | 0.763681557 |
| 223451_s_at | 0.187726068 | 3.318895745 | 0.001558105 | 0.007396156 |
| 223452_s_at | 0.064811116 | 1.877607798 | 0.065417318 | 0.157421428 |
| 223453_s_at | -0.03996197 | -1.47201477 | 0.146370502 | 0.289041508 |
| 223454_at   | 0.222858909 | 2.979180697 | 0.004201462 | 0.017093467 |
| 223455_at   | 0.231115954 | 5.428966578 | 1.14E-06    | 1.78E-05    |
| 223456_s_at | -0.05848384 | -1.63286403 | 0.107863076 | 0.230563257 |
| 223457_at   | -0.1022147  | -1.55073061 | 0.126353707 | 0.259667994 |
| 223458_at   | -0.29745213 | -4.84962367 | 9.50E-06    | 0.000102305 |
| 223459_s_at | 0.084660552 | 2.347417153 | 0.022304143 | 0.067243689 |
| 223460_at   | -0.36765352 | -6.2879686  | 4.39E-08    | 1.33E-06    |
| 223461_at   | -0.20356679 | -3.52329965 | 0.000833776 | 0.004378743 |
| 223462_at   | -0.01055126 | -0.28139815 | 0.779396893 | 0.8738568   |
| 223463_at   | 0.411858492 | 4.799474842 | 1.14E-05    | 0.000118758 |
| 223464_at   | 0.08483262  | 2.570151413 | 0.012729923 | 0.042469821 |
| 223465_at   | -0.18120868 | -1.82675671 | 0.07283374  | 0.170745148 |
| 223466_x_at | -0.13487296 | -2.49141011 | 0.01557701  | 0.050174251 |
| 223467_at   | 0.065283188 | 0.514678689 | 0.608714527 | 0.758085873 |
| 223468_s_at | 0.645655321 | 6.843415097 | 5.14E-09    | 2.83E-07    |
| 223469_at   | 0.250155085 | 5.95009001  | 1.60E-07    | 3.62E-06    |
| 223470_at   | 0.160113134 | 3.700774801 | 0.000476791 | 0.002752025 |
| 223471_at   | -0.0904379  | -0.67839132 | 0.500195422 | 0.672842975 |
| 223472_at   | -0.13035486 | -3.07370301 | 0.003207925 | 0.013590729 |
| 223473_at   | 0.01296545  | 0.454275957 | 0.651309401 | 0.788651    |
| 223474_at   | 0.159934288 | 2.957431592 | 0.004467434 | 0.017985636 |
| 223475_at   | 0.612116234 | 2.95299853  | 0.004523531 | 0.018177094 |
| 223476_s_at | -0.03775547 | -1.1530225  | 0.253585421 | 0.426574813 |
| 223477_s_at | 0.068296752 | 2.071451617 | 0.04273106  | 0.112675471 |
| 223478_at   | -0.04352034 | -1.25126994 | 0.215811193 | 0.381800089 |
| 223479_s_at | 0.062415379 | 1.320087502 | 0.191942186 | 0.351381647 |
| 223480_s_at | -0.07887892 | -1.25440811 | 0.214677039 | 0.380359954 |
| 223481_s_at | -0.08690253 | -1.90268791 | 0.062001187 | 0.150931808 |
| 223482_at   | -0.08432169 | -2.0482826  | 0.045023587 | 0.117532411 |
| 223483_at   | -0.06888937 | -2.14126543 | 0.036424829 | 0.099334784 |
| 223484_at   | 0.025340291 | 0.856402429 | 0.39526576  | 0.577880118 |
| 223485_at   | -0.10443005 | -3.92936852 | 0.000227428 | 0.001471794 |
| 223486_at   | -0.07273344 | -2.73342872 | 0.008275452 | 0.029910756 |
| 223487_x_at | 0.16053027  | 4.586644396 | 2.42E-05    | 0.000224306 |
| 223488_s_at | -0.0303586  | -0.61010624 | 0.544151589 | 0.708602064 |
| 223489_x_at | 0.040776203 | 1.042554169 | 0.301439347 | 0.480985658 |
| 223490_s_at | 0.047089534 | 1.12942069  | 0.263325176 | 0.438061745 |
| 223491_at   | 0.090550831 | 1.867404489 | 0.066851973 | 0.160046517 |
| 223492_s_at | -0.308275   | -3.93159475 | 0.00022577  | 0.001462972 |
| 223493_at   | 0.031749661 | 0.626590325 | 0.533362675 | 0.700225344 |
| 223494_at   | 0.022539559 | 0.377232166 | 0.707364599 | 0.827643747 |
| 223495_at   | 0.078883426 | 1.820815529 | 0.073744611 | 0.17237417  |
| 223496_s_at | 0.278541912 | 4.89353271  | 8.12E-06    | 8.97E-05    |
| 223497_at   | 0.202822157 | 3.109500155 | 0.002892644 | 0.012445345 |
| 223498_at   | 0.092419715 | 2.076736031 | 0.042222585 | 0.111650894 |
| 223499_at   | 0.371009523 | 4.968600847 | 6.19E-06    | 7.18E-05    |
| 223500_at   | -1.2268197  | -6.74292917 | 7.59E-09    | 3.68E-07    |
| 223501_at   | 0.075350616 | 1.517778448 | 0.134450144 | 0.271868873 |
| 223502_s_at | 0.177450937 | 2.878376104 | 0.005571606 | 0.021547788 |
| 223503_at   | -0.02133832 | -0.27020814 | 0.78795004  | 0.878948289 |
| 223504_at   | -0.27711725 | -4.13747229 | 0.000113804 | 0.000821671 |
| 223505_s_at | -0.02248723 | -0.40451633 | 0.687306649 | 0.813483743 |
| 223506_at   | -0.05230757 | -1.5740256  | 0.120868631 | 0.250912186 |
| 223507_at   | -0.01248405 | -0.26809285 | 0.78956986  | 0.880162032 |
| 223508_at   | 0.057984347 | 1.988826346 | 0.051398914 | 0.130281323 |
| 223509_at   | -0.0044011  | -0.15688436 | 0.875875576 | 0.933392895 |
| 223510_at   | -0.04619339 | -1.58923269 | 0.117392212 | 0.245633819 |
| 223511_at   | -0.01529978 | -0.43495609 | 0.665192909 | 0.798322    |
| 223512_at   | 0.121967475 | 5.248657041 | 2.22E-06    | 3.09E-05    |
| 223513_at   | 0.008841343 | 0.193304319 | 0.847389478 | 0.916134537 |
| 223514_at   | 0.029407442 | 0.879138312 | 0.382919177 | 0.565602137 |
| 223515_s_at | -0.33725406 | -5.19117321 | 2.75E-06    | 3.67E-05    |
| 223516_s_at | -0.08880928 | -1.60939214 | 0.112908256 | 0.238462067 |
| 223517_at   | -0.26019781 | -5.81579367 | 2.66E-07    | 5.42E-06    |

|             |             |             |             |             |
|-------------|-------------|-------------|-------------|-------------|
| 223518_at   | -0.05768923 | -1.57603444 | 0.120404717 | 0.25014539  |
| 223519_at   | 0.552950969 | 5.721191132 | 3.81E-07    | 7.27E-06    |
| 223520_s_at | 0.01380591  | 0.347006006 | 0.729830634 | 0.842427351 |
| 223522_at   | -0.21317037 | -4.2332745  | 8.23E-05    | 0.00062546  |
| 223523_at   | 0.19576069  | 3.724563273 | 0.000441902 | 0.002578264 |
| 223524_s_at | 0.12111563  | 2.758870825 | 0.007727182 | 0.028255869 |
| 223525_at   | -0.06438518 | -2.03704496 | 0.046173333 | 0.119900139 |
| 223526_at   | -0.03535296 | -1.27731323 | 0.206532229 | 0.370042429 |
| 223527_s_at | 0.034900072 | 0.803251001 | 0.425077704 | 0.606447448 |
| 223528_s_at | 0.159695093 | 3.625968306 | 0.000604499 | 0.003356478 |
| 223529_at   | -0.97546097 | -5.77939769 | 3.06E-07    | 6.07E-06    |
| 223530_at   | -0.27904437 | -4.67803791 | 1.75E-05    | 0.000170704 |
| 223531_x_at | 0.089194791 | 2.070130496 | 0.042859008 | 0.11294621  |
| 223532_at   | -0.20487288 | -3.9012774  | 0.00024938  | 0.001590369 |
| 223533_at   | 0.00994781  | 0.309179393 | 0.758282343 | 0.860991511 |
| 223534_s_at | -0.04112922 | -1.16539365 | 0.248584222 | 0.420854839 |
| 223535_at   | 0.223745992 | 3.553107792 | 0.000759839 | 0.004064481 |
| 223536_at   | 0.343522868 | 3.737541329 | 0.000423913 | 0.002489554 |
| 223537_s_at | -0.00826616 | -0.22614067 | 0.821879393 | 0.900996637 |
| 223538_at   | -0.37546174 | -3.33532252 | 0.001482872 | 0.007097078 |
| 223539_s_at | -0.2997844  | -4.31941229 | 6.13E-05    | 0.000487795 |
| 223540_at   | 0.033905196 | 1.289254356 | 0.202378431 | 0.364882074 |
| 223541_at   | 0.037697889 | 0.793799643 | 0.430516647 | 0.611388728 |
| 223542_at   | -0.09049754 | -0.99506684 | 0.323797343 | 0.50582512  |
| 223543_at   | -0.52881846 | -8.04761313 | 4.78E-11    | 1.38E-08    |
| 223544_at   | 0.071225914 | 1.601314861 | 0.114687937 | 0.241342559 |
| 223545_at   | -0.06031721 | -1.68329643 | 0.097641592 | 0.213691691 |
| 223546_x_at | 0.085962266 | 2.343035486 | 0.022544417 | 0.067846139 |
| 223547_at   | 0.037437508 | 0.528433104 | 0.5991956   | 0.751006243 |
| 223548_at   | 0.068080095 | 2.634617287 | 0.010760186 | 0.036989019 |
| 223549_s_at | -0.00456477 | -0.1772778  | 0.859901875 | 0.923638112 |
| 223550_s_at | -0.0079575  | -0.13091846 | 0.896288488 | 0.944379267 |
| 223551_at   | -0.08184589 | -1.69850764 | 0.094719259 | 0.208868752 |
| 223552_at   | -0.18418908 | -4.69652772 | 1.64E-05    | 0.00016166  |
| 223553_s_at | 0.095136809 | 1.861055539 | 0.067758022 | 0.161721843 |
| 223554_s_at | -0.03316207 | -1.1433197  | 0.257557886 | 0.431244457 |
| 223555_at   | 0.057650895 | 1.206895634 | 0.232324503 | 0.40082793  |
| 223556_at   | -0.01667564 | -0.53520655 | 0.594533506 | 0.747612375 |
| 223557_s_at | -0.04462963 | -0.36405072 | 0.717131174 | 0.834397084 |
| 223558_at   | -0.00717116 | -0.26007557 | 0.795717646 | 0.884016432 |
| 223559_s_at | 0.009577872 | 0.1622058   | 0.871702132 | 0.930774862 |
| 223560_s_at | -0.14429714 | -2.81987505 | 0.006545819 | 0.024620916 |
| 223561_at   | 0.004783154 | 0.119311175 | 0.905437152 | 0.949911181 |
| 223562_at   | 0.049351735 | 1.238645908 | 0.220418313 | 0.387404585 |
| 223563_at   | 0.003523939 | 0.095933186 | 0.923901149 | 0.960185392 |
| 223564_s_at | -0.01999248 | -0.60246728 | 0.549188809 | 0.712390608 |
| 223565_at   | 0.026233687 | 0.8127429   | 0.419657078 | 0.601826277 |
| 223566_s_at | 0.085366823 | 1.246235405 | 0.217639939 | 0.383959791 |
| 223567_at   | -0.59872197 | -5.57796988 | 6.53E-07    | 1.12E-05    |
| 223568_s_at | 0.05634788  | 1.398487402 | 0.167239863 | 0.318705609 |
| 223569_at   | 0.094992072 | 3.133194191 | 0.002700175 | 0.011760667 |
| 223570_at   | 0.030865568 | 0.77611237  | 0.440805688 | 0.621172562 |
| 223571_at   | 0.019776145 | 0.477588795 | 0.63472055  | 0.777340041 |
| 223572_at   | 0.412726585 | 3.65569338  | 0.000550265 | 0.003105496 |
| 223573_s_at | -0.287049   | -4.88721493 | 8.30E-06    | 9.15E-05    |
| 223574_x_at | -0.3219223  | -2.37506053 | 0.020840258 | 0.063676271 |
| 223575_at   | 0.022760085 | 0.861959375 | 0.392225519 | 0.575034212 |
| 223576_at   | 0.013545242 | 0.278730256 | 0.781433671 | 0.875110485 |
| 223577_x_at | -0.02936666 | -0.33688243 | 0.737409783 | 0.847486718 |
| 223578_x_at | -0.09639468 | -1.84186632 | 0.070559686 | 0.166611745 |
| 223579_s_at | 0.020894003 | 0.611336794 | 0.543342356 | 0.707940193 |
| 223580_at   | 0.210722972 | 4.531007089 | 2.94E-05    | 0.000264136 |
| 223581_at   | 0.071361313 | 2.009068583 | 0.049146351 | 0.125777883 |
| 223582_at   | 0.106243683 | 1.314200189 | 0.193902903 | 0.353912789 |
| 223583_at   | 0.035754173 | 1.030616061 | 0.30695837  | 0.487148306 |
| 223584_s_at | -0.136782   | -2.12068396 | 0.038193531 | 0.103082632 |
| 223585_x_at | -0.17098207 | -3.19889266 | 0.002227408 | 0.009985687 |
| 223586_at   | 0.000123551 | 0.003210312 | 0.997449457 | 0.998747055 |
| 223587_s_at | 0.059345225 | 1.56552105  | 0.122848559 | 0.254053389 |
| 223588_at   | 0.227175667 | 3.224589165 | 0.002064604 | 0.009358143 |
| 223589_at   | -0.01756612 | -0.54266164 | 0.589421993 | 0.743901784 |
| 223590_at   | 0.109643464 | 2.644148765 | 0.010493781 | 0.036257292 |
| 223591_at   | 0.322147699 | 5.063387413 | 4.38E-06    | 5.42E-05    |
| 223592_s_at | 0.548298957 | 7.499664241 | 4.01E-10    | 5.04E-08    |
| 223593_at   | 0.065207746 | 2.296624677 | 0.025234581 | 0.074267937 |

|             |             |             |             |             |
|-------------|-------------|-------------|-------------|-------------|
| 223594_at   | 0.045491063 | 1.137527301 | 0.259950383 | 0.433982164 |
| 223595_at   | 0.377208395 | 4.789706799 | 1.18E-05    | 0.000122141 |
| 223596_at   | -0.19765911 | -5.4061066  | 1.24E-06    | 1.90E-05    |
| 223597_at   | 0.04105989  | 1.110467297 | 0.271336181 | 0.447259861 |
| 223598_at   | -0.11131959 | -1.16624149 | 0.248244081 | 0.420454181 |
| 223599_at   | 0.09640742  | 1.967370022 | 0.053882794 | 0.135273385 |
| 223600_s_at | 0.124090027 | 3.391130326 | 0.001252124 | 0.006151472 |
| 223601_at   | -0.21452037 | -3.36911426 | 0.00133877  | 0.006512005 |
| 223602_at   | -0.06717065 | -1.08184494 | 0.28375587  | 0.461200034 |
| 223603_at   | -0.46751581 | -6.74208951 | 7.62E-09    | 3.68E-07    |
| 223604_at   | -0.02451104 | -0.57404513 | 0.568135479 | 0.727497302 |
| 223605_at   | 0.467424426 | 4.605427586 | 2.27E-05    | 0.000212194 |
| 223606_x_at | -0.24886136 | -3.11944076 | 0.002810382 | 0.012164802 |
| 223607_x_at | -0.01928531 | -0.71966926 | 0.474590852 | 0.650566339 |
| 223608_at   | 0.235538022 | 2.069779752 | 0.042893032 | 0.113015882 |
| 223609_at   | 0.183026256 | 1.916370906 | 0.060202123 | 0.147429981 |
| 223610_at   | -0.08734707 | -1.90673069 | 0.061464945 | 0.149863139 |
| 223611_s_at | -1.07313817 | -7.56329552 | 3.13E-10    | 4.38E-08    |
| 223612_s_at | -0.42474658 | -6.0495762  | 1.09E-07    | 2.70E-06    |
| 223613_at   | 0.010032671 | 0.369374591 | 0.713180716 | 0.831597593 |
| 223614_at   | -0.03300635 | -0.49388562 | 0.623234208 | 0.768671576 |
| 223615_at   | 0.05096674  | 1.601918928 | 0.114554063 | 0.241163041 |
| 223616_at   | 0.038099511 | 0.867618236 | 0.389144515 | 0.572018374 |
| 223617_x_at | -0.01601882 | -0.58894032 | 0.558166145 | 0.719950398 |
| 223618_at   | 0.171580107 | 2.515076509 | 0.014666085 | 0.04767998  |
| 223619_x_at | 0.196860337 | 4.874820306 | 8.68E-06    | 9.49E-05    |
| 223620_at   | -0.04511812 | -0.33417581 | 0.739440613 | 0.848899322 |
| 223621_at   | -0.14596802 | -2.62235133 | 0.011112091 | 0.037975342 |
| 223622_s_at | 0.13871161  | 3.812458788 | 0.000333013 | 0.002032369 |
| 223623_at   | 0.157035283 | 1.264669103 | 0.210999429 | 0.375861393 |
| 223624_at   | 0.000103074 | 0.003248847 | 0.997418841 | 0.998747055 |
| 223625_at   | -0.02772562 | -0.78295328 | 0.436809147 | 0.617370557 |
| 223626_x_at | 0.223014319 | 5.643124344 | 5.11E-07    | 9.21E-06    |
| 223627_at   | -0.02658441 | -0.92424991 | 0.359148742 | 0.542284387 |
| 223628_at   | -0.33804613 | -5.17643605 | 2.90E-06    | 3.84E-05    |
| 223629_at   | -0.01393975 | -0.23515336 | 0.814909987 | 0.896358867 |
| 223630_at   | -0.15730049 | -4.10151483 | 0.000128419 | 0.000911727 |
| 223631_s_at | 0.176854211 | 4.078797131 | 0.000138571 | 0.000969932 |
| 223632_s_at | -0.02375409 | -0.77306714 | 0.442591639 | 0.622818161 |
| 223633_s_at | 0.028229454 | 0.653405021 | 0.516052359 | 0.686084458 |
| 223634_at   | -1.33754511 | -7.97312799 | 6.38E-11    | 1.63E-08    |
| 223635_s_at | -0.26930242 | -6.53030167 | 1.73E-08    | 6.64E-07    |
| 223636_at   | 0.328794401 | 3.634738933 | 0.000587988 | 0.003284384 |
| 223637_s_at | 0.047644662 | 1.435229765 | 0.156540843 | 0.303282615 |
| 223638_at   | 0.123716029 | 3.14089502  | 0.00264025  | 0.011526622 |
| 223639_s_at | 0.003334229 | 0.082063748 | 0.934875844 | 0.966170385 |
| 223640_at   | 0.052733359 | 1.226348545 | 0.2249754   | 0.392206295 |
| 223641_at   | 0.013803006 | 0.235950298 | 0.814294439 | 0.895924349 |
| 223642_at   | 0.433425518 | 4.114058626 | 0.000123126 | 0.000879595 |
| 223643_at   | 0.120061741 | 2.345379564 | 0.022415591 | 0.06749748  |
| 223644_s_at | 0.073134714 | 2.193448505 | 0.032257707 | 0.090290064 |
| 223645_s_at | -0.1181341  | -2.67273358 | 0.009730523 | 0.034140095 |
| 223646_s_at | -0.04990095 | -0.86043213 | 0.393059634 | 0.575841455 |
| 223647_x_at | 0.183857324 | 4.444526363 | 3.98E-05    | 0.000340817 |
| 223648_s_at | 0.025759943 | 0.519193009 | 0.605582718 | 0.755532992 |
| 223649_s_at | 0.065033036 | 1.459885455 | 0.149665132 | 0.293721642 |
| 223650_s_at | -0.12804497 | -1.72487101 | 0.089824882 | 0.200652452 |
| 223651_x_at | -0.25166957 | -4.03216409 | 0.000161894 | 0.00110295  |
| 223652_at   | 0.042094624 | 1.289640719 | 0.202245083 | 0.364729935 |
| 223653_x_at | -0.33218301 | -5.23720982 | 2.32E-06    | 3.20E-05    |
| 223654_s_at | -0.53054371 | -5.1801769  | 2.86E-06    | 3.80E-05    |
| 223655_at   | -0.06121433 | -1.862015   | 0.067620437 | 0.161496959 |
| 223656_s_at | 0.0325448   | 0.886724485 | 0.378854058 | 0.561471865 |
| 223657_at   | 0.113105471 | 2.750929996 | 0.007894613 | 0.028771592 |
| 223658_at   | 0.093156808 | 2.744173968 | 0.008039679 | 0.029214516 |
| 223659_at   | -0.0295828  | -0.99831207 | 0.322234999 | 0.504110523 |
| 223660_at   | 0.102431196 | 0.909503621 | 0.366812185 | 0.549990612 |
| 223661_at   | -0.1921272  | -3.70048677 | 0.00047723  | 0.002754176 |
| 223662_x_at | 0.250415736 | 6.046413324 | 1.11E-07    | 2.73E-06    |
| 223663_at   | 0.070218237 | 2.13705374  | 0.036780828 | 0.100093295 |
| 223664_x_at | -0.04829484 | -1.16016167 | 0.250690616 | 0.4233305   |
| 223665_at   | -0.0073383  | -0.30117016 | 0.764351435 | 0.864557459 |
| 223666_at   | 0.00829161  | 0.244224225 | 0.807910738 | 0.892063116 |
| 223667_at   | -0.0819723  | -2.48809172 | 0.015708739 | 0.050518453 |
| 223668_at   | -0.03033094 | -0.8738234  | 0.385783489 | 0.568442705 |

|             |             |             |             |             |
|-------------|-------------|-------------|-------------|-------------|
| 223669_at   | 0.019086845 | 0.792047719 | 0.431529354 | 0.612378089 |
| 223670_s_at | -0.11601563 | -2.46855956 | 0.016504667 | 0.052619957 |
| 223671_x_at | -0.03406159 | -0.92339286 | 0.359591295 | 0.542714243 |
| 223672_at   | -0.66615412 | -6.86941889 | 4.65E-09    | 2.63E-07    |
| 223673_at   | 0.915372156 | 5.889747508 | 2.01E-07    | 4.36E-06    |
| 223674_s_at | -0.03970757 | -1.2267413  | 0.224828796 | 0.392071942 |
| 223675_s_at | -0.08287162 | -1.5437295  | 0.128040512 | 0.262170091 |
| 223676_at   | 0.007138516 | 0.187874329 | 0.85162459  | 0.918571751 |
| 223677_at   | 0.053060696 | 1.451525521 | 0.151969488 | 0.297006503 |
| 223678_s_at | 0.003692098 | 0.102614269 | 0.918619666 | 0.957036461 |
| 223679_at   | 0.317052803 | 5.287734915 | 1.92E-06    | 2.74E-05    |
| 223680_at   | 0.069379465 | 2.106596607 | 0.039446916 | 0.105699476 |
| 223681_s_at | -0.09707991 | -1.70864627 | 0.092811672 | 0.205710139 |
| 223682_s_at | -0.14482733 | -4.02348092 | 0.000166636 | 0.001128379 |
| 223683_at   | 0.092499778 | 2.654385368 | 0.010214382 | 0.035467418 |
| 223684_s_at | -0.04615333 | -1.56450568 | 0.123086671 | 0.254437655 |
| 223685_s_at | 0.061341146 | 1.81320428  | 0.074925468 | 0.174522802 |
| 223686_at   | -0.00429347 | -0.16984863 | 0.86571453  | 0.927451969 |
| 223687_s_at | 0.031633295 | 1.174103343 | 0.245105919 | 0.41640148  |
| 223688_s_at | -0.01410862 | -0.37028652 | 0.712504823 | 0.831156441 |
| 223689_at   | -0.00872622 | -0.24816903 | 0.804871727 | 0.890061473 |
| 223690_at   | 0.020757192 | 0.531379996 | 0.597165197 | 0.749595348 |
| 223691_at   | 0.259763074 | 3.156672033 | 0.002521351 | 0.011081151 |
| 223692_at   | 0.038389084 | 1.242752961 | 0.218911574 | 0.385636424 |
| 223693_s_at | -0.00109641 | -0.02927642 | 0.97674367  | 0.988331554 |
| 223694_at   | -0.04329021 | -1.2225338  | 0.226402982 | 0.393957407 |
| 223695_s_at | 0.207563018 | 4.228293899 | 8.37E-05    | 0.00063384  |
| 223696_at   | 0.129090652 | 2.166027764 | 0.034392063 | 0.094949967 |
| 223697_x_at | 0.367583567 | 7.305957941 | 8.53E-10    | 8.47E-08    |
| 223698_at   | 0.083652942 | 1.402664656 | 0.165995799 | 0.316950696 |
| 223699_at   | -0.10612199 | -0.60567143 | 0.547073084 | 0.710729056 |
| 223700_at   | -0.00531518 | -0.19974924 | 0.842368641 | 0.913388633 |
| 223701_s_at | 0.277592593 | 4.027544631 | 0.0001644   | 0.001116283 |
| 223702_x_at | -0.04217923 | -1.11757007 | 0.268314221 | 0.443685912 |
| 223703_at   | 0.17409032  | 4.075478769 | 0.000140117 | 0.00097861  |
| 223704_s_at | 0.02996745  | 0.665331691 | 0.508450175 | 0.679636764 |
| 223705_s_at | 0.254967753 | 3.408356391 | 0.001188061 | 0.005885915 |
| 223706_at   | 0.066958421 | 1.342969081 | 0.184463571 | 0.341778779 |
| 223707_at   | -0.35026595 | -4.2252599  | 8.46E-05    | 0.000639477 |
| 223708_at   | -1.26620723 | -6.88759949 | 4.33E-09    | 2.50E-07    |
| 223709_s_at | -0.12069416 | -3.46268715 | 0.001005749 | 0.00511947  |
| 223710_at   | -0.01700211 | -0.62152759 | 0.536664426 | 0.702891196 |
| 223711_s_at | -0.16188788 | -2.85335301 | 0.005970627 | 0.022810675 |
| 223712_at   | 0.018224779 | 0.435005911 | 0.665156951 | 0.798308712 |
| 223713_at   | -0.02927782 | -0.62871582 | 0.531979646 | 0.69906599  |
| 223714_at   | 0.032658147 | 0.921333305 | 0.360656219 | 0.543799614 |
| 223715_at   | -0.22204772 | -5.42262737 | 1.17E-06    | 1.81E-05    |
| 223716_s_at | -0.00684114 | -0.10123868 | 0.919706795 | 0.957744859 |
| 223717_s_at | 0.04511179  | 1.45344988  | 0.151436612 | 0.296270577 |
| 223718_at   | 0.011064685 | 0.356658609 | 0.722629193 | 0.837936379 |
| 223719_s_at | -0.04776632 | -1.52951316 | 0.131520944 | 0.26748014  |
| 223720_at   | -0.02138224 | -0.46207188 | 0.645741732 | 0.785078605 |
| 223721_s_at | -0.48360841 | -6.54106635 | 1.66E-08    | 6.46E-07    |
| 223722_at   | -0.05277102 | -1.63138066 | 0.108176406 | 0.23110038  |
| 223723_at   | -0.01049382 | -0.33597142 | 0.738093124 | 0.847983916 |
| 223724_s_at | 0.040167793 | 0.931336287 | 0.355503034 | 0.538563432 |
| 223725_at   | -0.12858908 | -3.09875913 | 0.002984061 | 0.012785317 |
| 223726_at   | -0.30996976 | -7.02266673 | 2.56E-09    | 1.73E-07    |
| 223727_at   | -1.08106625 | -7.89389797 | 8.67E-11    | 1.95E-08    |
| 223728_at   | 0.004476504 | 0.154934689 | 0.877405534 | 0.934442079 |
| 223729_at   | 0.043446239 | 1.292217618 | 0.201357378 | 0.363509422 |
| 223730_at   | 0.207894666 | 5.092033332 | 3.95E-06    | 4.96E-05    |
| 223731_at   | -0.02000612 | -0.48251583 | 0.631238176 | 0.774801477 |
| 223732_at   | -0.0129564  | -0.27950312 | 0.780843476 | 0.874741498 |
| 223733_s_at | -0.01768364 | -0.50299979 | 0.616850869 | 0.764363519 |
| 223734_at   | 0.07133872  | 1.631152365 | 0.108224695 | 0.231159342 |
| 223735_at   | -0.3463897  | -6.27446511 | 4.63E-08    | 1.38E-06    |
| 223736_at   | -0.01963008 | -0.63687761 | 0.526686242 | 0.694916472 |
| 223737_x_at | 0.209984332 | 2.280402079 | 0.026240054 | 0.076623359 |
| 223738_s_at | 0.030158108 | 0.815454514 | 0.418116218 | 0.600541522 |
| 223739_at   | -0.03967981 | -1.15378785 | 0.25327395  | 0.426196778 |
| 223740_at   | 0.1140562   | 2.168689647 | 0.034179577 | 0.094503444 |
| 223741_s_at | 0.342915763 | 3.53657367  | 0.000800043 | 0.004229919 |
| 223742_at   | 0.048443248 | 1.507996114 | 0.136931332 | 0.275440412 |
| 223743_s_at | -0.37848477 | -6.76950151 | 6.85E-09    | 3.43E-07    |

|             |             |             |             |             |
|-------------|-------------|-------------|-------------|-------------|
| 223744_s_at | -0.02527166 | -0.50510896 | 0.615377859 | 0.763363696 |
| 223745_at   | -0.08184056 | -2.21627631 | 0.030570556 | 0.086384629 |
| 223746_at   | -0.02876745 | -1.02608784 | 0.309069628 | 0.489612216 |
| 223747_x_at | 0.036499323 | 0.831987957 | 0.408795362 | 0.590951581 |
| 223748_at   | 0.068232274 | 1.69660441  | 0.095080921 | 0.209472371 |
| 223749_at   | 0.060507615 | 1.739560081 | 0.087189673 | 0.196247023 |
| 223750_s_at | -0.03982963 | -1.22410655 | 0.225813615 | 0.393360699 |
| 223751_x_at | -0.03891942 | -1.08583838 | 0.281999723 | 0.4592978   |
| 223752_at   | 0.031478457 | 1.074894856 | 0.2868303   | 0.464895183 |
| 223753_s_at | -0.29957921 | -4.61347678 | 2.20E-05    | 0.000207212 |
| 223754_at   | 0.161933247 | 3.419184924 | 0.001149394 | 0.005719709 |
| 223755_at   | -0.05345657 | -1.34584465 | 0.183539584 | 0.340636075 |
| 223756_at   | 0.050136018 | 1.467769664 | 0.147517046 | 0.290804633 |
| 223757_at   | 0.052862141 | 0.962209796 | 0.33990029  | 0.522775957 |
| 223758_s_at | -0.09545663 | -1.58569895 | 0.118192779 | 0.246846661 |
| 223759_s_at | 0.009473273 | 0.234614897 | 0.815325959 | 0.896529568 |
| 223760_s_at | -0.05986131 | -1.73661103 | 0.087713535 | 0.197207631 |
| 223761_at   | -0.02507077 | -0.90153229 | 0.370998002 | 0.554258489 |
| 223762_at   | -0.0029271  | -0.07547851 | 0.940091231 | 0.96863172  |
| 223763_at   | -0.06759926 | -1.8972235  | 0.062732304 | 0.15236303  |
| 223764_x_at | -0.36761781 | -5.15825428 | 3.10E-06    | 4.07E-05    |
| 223765_s_at | -0.09295084 | -2.9414015  | 0.004673393 | 0.018655172 |
| 223766_at   | 0.012376322 | 0.27002732  | 0.788088466 | 0.879014942 |
| 223767_at   | -0.02650127 | -0.50852895 | 0.612992764 | 0.76135404  |
| 223768_at   | 0.051362964 | 1.268595028 | 0.209604781 | 0.374122644 |
| 223769_x_at | 0.160523601 | 4.983390616 | 5.86E-06    | 6.85E-05    |
| 223770_x_at | 0.007790231 | 0.2481834   | 0.804860665 | 0.890061473 |
| 223771_at   | 0.052665472 | 2.061042343 | 0.043748208 | 0.114896569 |
| 223772_s_at | 0.014340168 | 0.600563653 | 0.550447746 | 0.713365689 |
| 223773_s_at | 0.242391017 | 5.069671276 | 4.28E-06    | 5.31E-05    |
| 223774_at   | 0.067488342 | 1.849066365 | 0.069497243 | 0.164857054 |
| 223775_at   | 0.062642814 | 1.181230517 | 0.242285777 | 0.412834495 |
| 223776_x_at | 0.099313574 | 2.609960044 | 0.011478209 | 0.039023253 |
| 223777_at   | 0.075160315 | 1.745792426 | 0.086091094 | 0.194342013 |
| 223778_at   | -0.01442369 | -0.35610627 | 0.723040604 | 0.838099194 |
| 223779_at   | -0.04210276 | -1.41721314 | 0.161718682 | 0.31067449  |
| 223780_s_at | -0.02826821 | -0.86649466 | 0.389755047 | 0.572689787 |
| 223781_x_at | 0.0968826   | 2.269216909 | 0.026953838 | 0.078146022 |
| 223782_s_at | 0.012427398 | 0.42871387  | 0.66970424  | 0.801071164 |
| 223783_s_at | 0.009296428 | 0.347132163 | 0.729736353 | 0.842375313 |
| 223784_at   | -0.03734625 | -1.10606826 | 0.273219754 | 0.449204916 |
| 223785_at   | -0.06501166 | -1.60160046 | 0.114624627 | 0.241266135 |
| 223786_at   | 0.569715778 | 7.506005736 | 3.92E-10    | 4.95E-08    |
| 223787_s_at | 0.053177427 | 1.439304989 | 0.155387732 | 0.30180741  |
| 223788_at   | -0.03430966 | -0.73850619 | 0.463156181 | 0.641098739 |
| 223789_s_at | -0.01538384 | -0.33395821 | 0.739603967 | 0.848943283 |
| 223790_at   | 0.000567131 | 0.01446332  | 0.988509501 | 0.994742746 |
| 223791_at   | -0.01541243 | -0.30933091 | 0.758167679 | 0.860971049 |
| 223792_at   | -0.01283945 | -0.37851488 | 0.706416796 | 0.826925258 |
| 223793_at   | -0.10002801 | -2.92719322 | 0.004863282 | 0.019285697 |
| 223794_at   | 0.147057474 | 1.886908699 | 0.064132318 | 0.155014004 |
| 223795_at   | -0.05931321 | -1.49358724 | 0.140651819 | 0.280934266 |
| 223796_at   | -0.34184035 | -5.88994818 | 2.01E-07    | 4.36E-06    |
| 223797_at   | 0.210871962 | 3.637472451 | 0.00058293  | 0.003262658 |
| 223798_at   | -0.07909051 | -2.11834776 | 0.038398956 | 0.103505797 |
| 223799_at   | -0.06469147 | -1.27305164 | 0.208029922 | 0.372036053 |
| 223800_s_at | 0.009960241 | 0.273730574 | 0.785254761 | 0.877537623 |
| 223801_s_at | -0.01446638 | -0.36525615 | 0.716236022 | 0.833788484 |
| 223802_s_at | 0.046662267 | 0.776585678 | 0.440528485 | 0.62092957  |
| 223803_s_at | 0.087212014 | 1.862875291 | 0.067497274 | 0.161271756 |
| 223804_s_at | -0.05903183 | -1.13229306 | 0.262125875 | 0.436619195 |
| 223805_at   | -0.11988294 | -2.38801658 | 0.020184196 | 0.062055799 |
| 223806_s_at | -0.026612   | -0.79754304 | 0.428357505 | 0.609608763 |
| 223807_at   | 0.068550282 | 1.637264982 | 0.106937798 | 0.228935816 |
| 223808_s_at | 0.021181182 | 0.446452885 | 0.656916582 | 0.792347074 |
| 223809_at   | -0.02424189 | -0.59080378 | 0.556925103 | 0.719034455 |
| 223810_at   | -0.13430478 | -3.02556193 | 0.00368273  | 0.015286389 |
| 223811_s_at | -0.05116326 | -1.10670182 | 0.272947915 | 0.448956175 |
| 223812_at   | 0.00427408  | 0.136520407 | 0.891878105 | 0.942120445 |
| 223813_at   | 0.039567821 | 0.781053036 | 0.437917141 | 0.618349906 |
| 223814_at   | -0.08151194 | -1.95432167 | 0.055443038 | 0.138349073 |
| 223815_at   | 0.128731194 | 3.524222153 | 0.000831388 | 0.004369799 |
| 223816_at   | 0.049639807 | 1.938422724 | 0.057396185 | 0.142074233 |
| 223817_at   | 0.069883198 | 2.127760289 | 0.037577142 | 0.101781675 |
| 223818_s_at | -0.13685678 | -4.60907388 | 2.24E-05    | 0.00020988  |

|             |             |             |             |             |
|-------------|-------------|-------------|-------------|-------------|
| 223819_x_at | 0.06235109  | 1.579870041 | 0.119522907 | 0.248729641 |
| 223820_at   | -0.06293933 | -1.71800532 | 0.09107895  | 0.202784856 |
| 223821_s_at | -0.52645457 | -6.36702927 | 3.24E-08    | 1.05E-06    |
| 223822_at   | -0.28549191 | -6.19462919 | 6.29E-08    | 1.76E-06    |
| 223823_at   | 0.014880623 | 0.475163317 | 0.636437908 | 0.778432321 |
| 223824_at   | -0.0165815  | -0.49498131 | 0.622465263 | 0.768083534 |
| 223825_at   | -0.00628052 | -0.27306098 | 0.785766913 | 0.877827644 |
| 223826_s_at | -0.09987679 | -2.37506181 | 0.020840192 | 0.063676271 |
| 223827_at   | 0.050625577 | 1.185194832 | 0.240727312 | 0.410821179 |
| 223828_s_at | -0.01291955 | -0.39579043 | 0.693697809 | 0.818349586 |
| 223829_at   | 0.04401384  | 1.302949711 | 0.197691664 | 0.358667968 |
| 223830_s_at | -0.01628021 | -0.44739966 | 0.656236915 | 0.791999681 |
| 223831_x_at | 0.008847962 | 0.305012499 | 0.761437978 | 0.862649471 |
| 223832_s_at | -0.01032195 | -0.31284571 | 0.75550921  | 0.859537653 |
| 223833_at   | 0.030113065 | 0.922091052 | 0.360264179 | 0.543454507 |
| 223834_at   | -0.03589048 | -1.02277355 | 0.310621125 | 0.491321159 |
| 223835_x_at | 0.098810938 | 3.21643027  | 0.002115042 | 0.009553817 |
| 223836_at   | -0.03385698 | -0.56710234 | 0.57281195  | 0.730888816 |
| 223837_at   | -0.07385463 | -2.89786961 | 0.00527802  | 0.020604933 |
| 223838_at   | 0.333013615 | 3.216232259 | 0.002116281 | 0.009557479 |
| 223839_s_at | 0.148706277 | 1.40938622  | 0.164008996 | 0.314099954 |
| 223840_s_at | -0.00801588 | -0.29796998 | 0.766780592 | 0.866133866 |
| 223841_s_at | 0.037974597 | 1.5051852   | 0.137650954 | 0.27657359  |
| 223842_s_at | 0.080473296 | 0.93347076  | 0.354409626 | 0.537540196 |
| 223843_at   | 0.205945143 | 2.168859172 | 0.034166084 | 0.094471981 |
| 223844_at   | 0.064975285 | 2.227645537 | 0.029759651 | 0.084574484 |
| 223845_at   | -0.0182839  | -0.5960379  | 0.553446627 | 0.715867002 |
| 223846_at   | 0.12548863  | 2.449466917 | 0.017317613 | 0.054789661 |
| 223847_s_at | -0.062145   | -1.94397297 | 0.056707784 | 0.14075221  |
| 223848_at   | -0.02236941 | -0.77766201 | 0.43989849  | 0.620407998 |
| 223849_s_at | 0.137005138 | 3.882509107 | 0.000265168 | 0.001673619 |
| 223850_at   | 0.053486784 | 1.663772536 | 0.101500348 | 0.220185105 |
| 223851_s_at | 0.048732024 | 1.476957297 | 0.145044418 | 0.28718435  |
| 223852_s_at | 0.051282679 | 1.335027631 | 0.187033687 | 0.34499606  |
| 223853_at   | -0.08291553 | -2.60077583 | 0.011756618 | 0.039780949 |
| 223854_at   | -0.41944119 | -4.89704192 | 8.01E-06    | 8.88E-05    |
| 223855_s_at | -0.00213231 | -0.07775859 | 0.938285142 | 0.967666772 |
| 223856_at   | -0.01598591 | -0.65458793 | 0.515295669 | 0.685576603 |
| 223857_x_at | -0.18367781 | -2.97103544 | 0.004299297 | 0.017420143 |
| 223858_at   | 0.03766827  | 1.158074603 | 0.251534427 | 0.424482748 |
| 223859_at   | -0.45654301 | -5.58579036 | 6.34E-07    | 1.10E-05    |
| 223860_at   | 0.001010924 | 0.029900664 | 0.976247938 | 0.988120776 |
| 223861_at   | -0.03018156 | -0.83493947 | 0.407144867 | 0.58950071  |
| 223862_at   | -0.02561884 | -0.75888807 | 0.45096302  | 0.630318664 |
| 223863_at   | -0.03212043 | -1.33215435 | 0.18797023  | 0.346131512 |
| 223864_at   | 0.001307096 | 0.041916641 | 0.966707727 | 0.983117957 |
| 223865_at   | -0.03650802 | -0.8822493  | 0.381248822 | 0.564048343 |
| 223866_at   | -0.04865422 | -0.77502904 | 0.441440547 | 0.621773115 |
| 223867_at   | 0.095848402 | 1.812110136 | 0.075096515 | 0.174757275 |
| 223868_s_at | 0.106734509 | 1.856767775 | 0.068375765 | 0.162848373 |
| 223869_at   | -0.07612371 | -2.86674831 | 0.005753852 | 0.022130049 |
| 223870_at   | -0.02303934 | -0.53135424 | 0.597182932 | 0.749595348 |
| 223871_x_at | 0.067405465 | 2.217900093 | 0.030453561 | 0.086108476 |
| 223872_at   | -0.03529616 | -1.01534351 | 0.314118433 | 0.495222979 |
| 223873_s_at | -0.01081083 | -0.30925377 | 0.758226058 | 0.860978701 |
| 223874_at   | -0.18586318 | -5.39770924 | 1.28E-06    | 1.95E-05    |
| 223875_s_at | 0.027998061 | 0.823433816 | 0.413601892 | 0.595838434 |
| 223876_at   | -0.03200614 | -1.15210923 | 0.253957449 | 0.427088103 |
| 223877_at   | 0.019400571 | 0.395598167 | 0.693838881 | 0.818465057 |
| 223878_at   | -0.0049367  | -0.13119667 | 0.896069373 | 0.944272726 |
| 223879_s_at | -0.0411033  | -0.75042027 | 0.45600599  | 0.634964472 |
| 223880_x_at | -0.182771   | -2.84604299 | 0.006092084 | 0.023199338 |
| 223881_at   | 0.011174724 | 0.24371155  | 0.808305913 | 0.89230255  |
| 223882_at   | 0.135596011 | 3.365985153 | 0.001351536 | 0.006561246 |
| 223883_s_at | -0.15605473 | -3.31289785 | 0.001586462 | 0.007508435 |
| 223884_at   | -0.01958158 | -0.68035334 | 0.49896159  | 0.671848347 |
| 223885_at   | -0.74560515 | -7.26075849 | 1.02E-09    | 9.48E-08    |
| 223886_s_at | 0.078362116 | 1.698755426 | 0.094672256 | 0.208808789 |
| 223887_at   | 0.063264621 | 1.846535248 | 0.069869191 | 0.165470503 |
| 223888_s_at | -0.00264656 | -0.09297582 | 0.926240098 | 0.96133974  |
| 223889_at   | -0.06925493 | -1.64879482 | 0.104544275 | 0.225233673 |
| 223890_at   | 0.214405711 | 4.431575171 | 4.16E-05    | 0.000353531 |
| 223891_at   | -0.24799097 | -4.68119727 | 1.73E-05    | 0.000169093 |
| 223892_s_at | -0.00666865 | -0.09664039 | 0.923341932 | 0.959875267 |
| 223893_at   | -0.00776784 | -0.21723049 | 0.828783727 | 0.904981855 |

|             |             |             |             |             |
|-------------|-------------|-------------|-------------|-------------|
| 223894_s_at | -0.23588999 | -3.01678566 | 0.003776058 | 0.01562444  |
| 223895_s_at | -0.06266396 | -1.2192342  | 0.227643118 | 0.395120773 |
| 223896_at   | -0.03170146 | -1.25235925 | 0.215417007 | 0.381298938 |
| 223897_at   | -0.02722343 | -1.20453322 | 0.233228767 | 0.401876086 |
| 223898_at   | 0.004587073 | 0.181057984 | 0.856947193 | 0.921882437 |
| 223899_at   | -0.05610515 | -1.55604518 | 0.125085135 | 0.257700865 |
| 223900_s_at | 0.066052527 | 1.963506206 | 0.054340841 | 0.1361705   |
| 223901_at   | -0.34877337 | -5.87991817 | 2.09E-07    | 4.47E-06    |
| 223902_at   | -0.1379218  | -3.71151259 | 0.000460729 | 0.002673793 |
| 223903_at   | 0.018052497 | 0.502446269 | 0.617237702 | 0.764779245 |
| 223904_at   | -0.00172331 | -0.05346057 | 0.957546888 | 0.978276043 |
| 223905_at   | 0.043446551 | 0.865579539 | 0.390252752 | 0.57314092  |
| 223906_s_at | 0.026156457 | 0.722863805 | 0.47264052  | 0.648828176 |
| 223907_s_at | 0.027513607 | 0.752714026 | 0.454636746 | 0.633729195 |
| 223908_at   | 0.025720477 | 0.994270263 | 0.324181608 | 0.506248451 |
| 223909_s_at | -0.12172491 | -3.70399691 | 0.000471916 | 0.002727385 |
| 223910_at   | 0.03705687  | 1.187921382 | 0.239659653 | 0.409515168 |
| 223911_at   | -0.07979973 | -2.11398787 | 0.038784901 | 0.104275691 |
| 223912_s_at | 0.146625573 | 2.56664108  | 0.01284604  | 0.042782089 |
| 223913_s_at | -0.27518965 | -4.08277988 | 0.000136737 | 0.000959499 |
| 223915_at   | 0.191777291 | 4.897694585 | 7.99E-06    | 8.86E-05    |
| 223916_s_at | 0.037492674 | 0.990630428 | 0.325941331 | 0.508105396 |
| 223917_s_at | 0.06684688  | 1.927447297 | 0.058778474 | 0.144567033 |
| 223918_at   | -0.00065334 | -0.02271588 | 0.981954125 | 0.990915448 |
| 223919_at   | -0.07127424 | -1.78000298 | 0.080263275 | 0.184229177 |
| 223920_s_at | 0.028672088 | 0.8970248   | 0.37337833  | 0.556456727 |
| 223921_s_at | -0.05032707 | -1.24888625 | 0.216675626 | 0.382799031 |
| 223922_x_at | 0.08987116  | 1.668048324 | 0.100644783 | 0.218635425 |
| 223923_at   | 0.236111611 | 3.921469469 | 0.000233405 | 0.001505204 |
| 223924_at   | 0.156314706 | 2.278800744 | 0.026341205 | 0.076838401 |
| 223925_s_at | -0.17146604 | -3.67189139 | 0.0005227   | 0.002975103 |
| 223926_at   | -0.02016137 | -0.55400805 | 0.581682573 | 0.737742141 |
| 223927_at   | -0.03765977 | -1.0851482  | 0.282302694 | 0.459590266 |
| 223928_s_at | -0.06318373 | -1.49077586 | 0.141386955 | 0.281991511 |
| 223929_s_at | 0.052241013 | 1.296502149 | 0.199887876 | 0.361631743 |
| 223930_at   | 0.089058905 | 2.270360803 | 0.026880059 | 0.077982707 |
| 223931_s_at | 0.038018208 | 0.905424573 | 0.368950343 | 0.55223312  |
| 223932_at   | -0.05364203 | -1.63853903 | 0.106671144 | 0.228463447 |
| 223933_at   | -0.35163174 | -6.79313026 | 6.25E-09    | 3.22E-07    |
| 223934_at   | 0.000165364 | 0.005487636 | 0.995640172 | 0.997917707 |
| 223935_at   | 0.010838902 | 0.273193678 | 0.78566541  | 0.877750601 |
| 223936_s_at | -0.14974221 | -4.7800518  | 1.22E-05    | 0.000125758 |
| 223937_at   | 0.012630789 | 0.40432713  | 0.687444982 | 0.813603388 |
| 223938_at   | -0.02643657 | -0.92121599 | 0.360716939 | 0.543849248 |
| 223939_at   | -0.08108978 | -2.47402132 | 0.01627852  | 0.05201866  |
| 223940_x_at | 0.183224222 | 1.564641114 | 0.12305489  | 0.254385917 |
| 223941_at   | 0.018957691 | 0.498983241 | 0.619660341 | 0.76661204  |
| 223942_x_at | 0.00434273  | 0.138702212 | 0.890161301 | 0.941198401 |
| 223943_s_at | -0.03877736 | -1.06406564 | 0.291666537 | 0.470108225 |
| 223944_at   | -0.04610081 | -1.61872933 | 0.110878868 | 0.235321416 |
| 223945_x_at | 0.004733952 | 0.15841934  | 0.874671368 | 0.932576586 |
| 223946_at   | 0.003733917 | 0.137685513 | 0.890961249 | 0.941677666 |
| 223947_s_at | -0.03321208 | -0.75724934 | 0.451936426 | 0.631267169 |
| 223948_s_at | -0.00816184 | -0.2518661  | 0.802026317 | 0.888287077 |
| 223949_at   | 0.141631637 | 2.978090414 | 0.004214436 | 0.017130341 |
| 223950_s_at | -0.08923654 | -2.62668761 | 0.010986504 | 0.037622316 |
| 223951_at   | -0.10836753 | -2.34765922 | 0.022290936 | 0.067217226 |
| 223952_x_at | -0.0490904  | -0.6952135  | 0.489670799 | 0.663908562 |
| 223953_s_at | -0.00875136 | -0.23897566 | 0.811958744 | 0.89452166  |
| 223954_x_at | -0.04400412 | -1.4458864  | 0.153539457 | 0.299166648 |
| 223955_at   | -0.05466428 | -1.30872011 | 0.195741515 | 0.356289779 |
| 223956_at   | 0.025715664 | 0.618094247 | 0.538909523 | 0.704943086 |
| 223957_at   | 0.055808609 | 1.928112348 | 0.058693915 | 0.144415027 |
| 223958_s_at | 0.008322227 | 0.14324266  | 0.886590248 | 0.939234631 |
| 223959_at   | 0.155407252 | 2.354343249 | 0.021928998 | 0.06637662  |
| 223960_s_at | -0.11002689 | -1.97466616 | 0.053026865 | 0.133529222 |
| 223961_s_at | 0.034707668 | 1.124624092 | 0.265336551 | 0.440456901 |
| 223962_at   | 0.245548706 | 2.160678628 | 0.034822561 | 0.095871983 |
| 223963_s_at | -0.0163051  | -0.40956471 | 0.683619438 | 0.810879557 |
| 223964_x_at | -0.07050238 | -1.93712715 | 0.057557898 | 0.14234925  |
| 223965_at   | 0.030063704 | 1.156524405 | 0.252162493 | 0.425077177 |
| 223966_at   | 0.00784912  | 0.385033278 | 0.701607553 | 0.823776889 |
| 223967_at   | 0.007240359 | 0.220143675 | 0.826524834 | 0.903808343 |
| 223968_at   | -0.00813105 | -0.21611772 | 0.829646965 | 0.905539911 |
| 223969_s_at | 0.003287658 | 0.115672627 | 0.908307707 | 0.951487835 |

|             |             |             |             |             |
|-------------|-------------|-------------|-------------|-------------|
| 223970_at   | -0.0500039  | -1.56392048 | 0.123224074 | 0.254664986 |
| 223971_at   | 0.00826829  | 0.271981772 | 0.786592571 | 0.878298745 |
| 223973_at   | -0.05793464 | -1.34395287 | 0.184147061 | 0.341356942 |
| 223974_at   | 0.178101893 | 3.748884557 | 0.000408765 | 0.002417113 |
| 223975_at   | -0.10764122 | -2.48109866 | 0.015989634 | 0.051277114 |
| 223976_at   | -0.02907722 | -0.83095888 | 0.409371787 | 0.591537491 |
| 223977_s_at | 0.000410693 | 0.01176324  | 0.990654488 | 0.995555989 |
| 223978_s_at | 0.006334132 | 0.080617629 | 0.936020906 | 0.96673563  |
| 223979_x_at | -0.10619848 | -2.68988343 | 0.009297305 | 0.032901665 |
| 223980_s_at | 0.183593407 | 4.757446481 | 1.32E-05    | 0.000134533 |
| 223981_at   | 0.094216511 | 2.410298282 | 0.01909903  | 0.05938519  |
| 223982_s_at | 0.030363861 | 0.431626106 | 0.667597996 | 0.799793315 |
| 223983_s_at | -0.10234533 | -1.84806148 | 0.069644711 | 0.165113864 |
| 223984_s_at | 0.021398132 | 0.873056507 | 0.386197889 | 0.568847013 |
| 223985_at   | -0.00061809 | -0.02073276 | 0.983529309 | 0.991986005 |
| 223986_x_at | 0.078237216 | 1.735476554 | 0.087915753 | 0.197523166 |
| 223987_at   | 0.009597239 | 0.270817536 | 0.787483555 | 0.878710735 |
| 223988_x_at | 0.176970882 | 4.948604008 | 6.65E-06    | 7.64E-05    |
| 223989_s_at | -0.00814643 | -0.1847404  | 0.8540709   | 0.920135351 |
| 223990_at   | -0.0713647  | -1.58491659 | 0.118370615 | 0.247148775 |
| 223991_s_at | -0.01173366 | -0.25633482 | 0.798590601 | 0.885892313 |
| 223992_x_at | 0.082491546 | 2.912519836 | 0.005066882 | 0.019926983 |
| 223993_s_at | 0.042847059 | 0.668059325 | 0.506720053 | 0.678216663 |
| 223994_s_at | 0.005866522 | 0.141700362 | 0.887803001 | 0.939717494 |
| 223995_at   | -0.00986694 | -0.31328794 | 0.755174933 | 0.859320703 |
| 223996_s_at | -0.13545969 | -3.26635584 | 0.001823655 | 0.008445883 |
| 223997_at   | 0.004672996 | 0.107306211 | 0.91491281  | 0.954765438 |
| 223998_at   | -0.03538379 | -0.89184968 | 0.376123156 | 0.558907305 |
| 223999_at   | 0.007640443 | 0.23256012  | 0.816913796 | 0.897777161 |
| 224000_at   | -0.05977677 | -1.30688238 | 0.196361013 | 0.357115912 |
| 224001_at   | -0.11524969 | -2.87675158 | 0.005596743 | 0.021622548 |
| 224002_s_at | 0.031835803 | 0.734697154 | 0.465455618 | 0.643181319 |
| 224003_at   | -0.00238665 | -0.04653905 | 0.963038946 | 0.98113172  |
| 224004_at   | -0.08808126 | -2.51794036 | 0.014559185 | 0.047386504 |
| 224005_at   | 0.010906496 | 0.291648434 | 0.771585979 | 0.869264446 |
| 224006_at   | 0.044327729 | 1.370314607 | 0.175818632 | 0.330424389 |
| 224007_at   | -0.14509592 | -3.60897379 | 0.000637761 | 0.003514094 |
| 224008_s_at | -0.01129878 | -0.30406685 | 0.7621547   | 0.863127128 |
| 224009_x_at | -0.01046845 | -0.13036416 | 0.896725063 | 0.944627488 |
| 224010_at   | -0.02386933 | -0.62201192 | 0.536348107 | 0.702586738 |
| 224011_at   | -0.02107791 | -0.66251565 | 0.510239704 | 0.681091748 |
| 224012_at   | -0.01901767 | -0.41496107 | 0.679686615 | 0.808127799 |
| 224013_s_at | -0.0157556  | -0.41254062 | 0.681449521 | 0.809471484 |
| 224014_at   | -0.01302899 | -0.40121083 | 0.689725048 | 0.815235662 |
| 224015_s_at | -0.04121001 | -1.12107446 | 0.266832005 | 0.442060471 |
| 224016_at   | 0.173890477 | 3.391444241 | 0.001250928 | 0.006146946 |
| 224017_at   | 0.001807889 | 0.084260861 | 0.933136396 | 0.965310623 |
| 224018_s_at | -0.17700671 | -1.53353466 | 0.130528858 | 0.266006075 |
| 224019_at   | 0.056209916 | 2.261489725 | 0.02745694  | 0.079285751 |
| 224020_at   | 0.000143628 | 0.005164525 | 0.995896875 | 0.997995945 |
| 224021_at   | -0.06924006 | -1.87998619 | 0.065086667 | 0.156735456 |
| 224022_x_at | -0.04501984 | -1.37096444 | 0.17561703  | 0.330164745 |
| 224023_s_at | -0.02684122 | -0.80161104 | 0.426018485 | 0.607394744 |
| 224024_at   | 0.015466837 | 0.58054962  | 0.563771295 | 0.724323276 |
| 224025_s_at | 0.04156395  | 1.067230763 | 0.29024724  | 0.468521829 |
| 224026_at   | -0.09231129 | -2.26468701 | 0.02724772  | 0.078814149 |
| 224027_at   | 0.011444643 | 0.327714533 | 0.744296156 | 0.851920397 |
| 224028_at   | -0.00137337 | -0.04361816 | 0.965357152 | 0.982392737 |
| 224029_x_at | 0.103642441 | 4.344992494 | 5.61E-05    | 0.000454446 |
| 224030_s_at | -0.37928588 | -6.82572285 | 5.51E-09    | 2.95E-07    |
| 224031_at   | -0.00659507 | -0.22903369 | 0.81964065  | 0.899503485 |
| 224032_x_at | -0.03465384 | -0.87392666 | 0.385727712 | 0.568379258 |
| 224033_at   | -0.03604135 | -0.99489154 | 0.323881878 | 0.505904128 |
| 224034_at   | 0.039309381 | 1.557393085 | 0.124765018 | 0.257171764 |
| 224035_s_at | -0.04353787 | -1.05442814 | 0.29601759  | 0.474945903 |
| 224036_s_at | -0.24392784 | -4.06945255 | 0.000142968 | 0.000994944 |
| 224037_at   | -0.08811689 | -2.65501178 | 0.010197507 | 0.035430846 |
| 224038_at   | -0.101548   | -2.80345015 | 0.00684633  | 0.025570467 |
| 224039_at   | -0.06789334 | -2.24880577 | 0.028300794 | 0.081260463 |
| 224040_at   | -0.02371796 | -0.64097115 | 0.524041766 | 0.692647047 |
| 224041_at   | -0.01087453 | -0.33777074 | 0.736743677 | 0.847072326 |
| 224042_at   | 0.039391985 | 1.369038463 | 0.176215053 | 0.330899291 |
| 224043_s_at | -0.05229522 | -1.06526649 | 0.291127492 | 0.469544204 |
| 224044_at   | 0.022310322 | 0.722992358 | 0.47256213  | 0.648780349 |
| 224045_x_at | -0.02296434 | -0.74824671 | 0.457305678 | 0.63612775  |



|             |             |             |             |             |
|-------------|-------------|-------------|-------------|-------------|
| 224046_s_at | 0.07640626  | 1.425654601 | 0.159276387 | 0.307330122 |
| 224047_at   | -0.0537872  | -1.83199881 | 0.072037911 | 0.169412666 |
| 224048_at   | 0.0006473   | 0.025448321 | 0.979783882 | 0.989861457 |
| 224049_at   | -0.02796603 | -0.58707151 | 0.559412137 | 0.721041062 |
| 224050_s_at | 0.046340122 | 1.846421784 | 0.069885903 | 0.165492544 |
| 224051_at   | -0.02029003 | -0.51355289 | 0.609496702 | 0.75865831  |
| 224052_at   | -0.07516925 | -2.02879109 | 0.047033875 | 0.121589424 |
| 224053_s_at | -0.00473034 | -0.1127677  | 0.910600369 | 0.952869107 |
| 224054_at   | -0.01123545 | -0.26471682 | 0.792157043 | 0.881572812 |
| 224055_x_at | 0.021973885 | 0.718817367 | 0.475111711 | 0.651060667 |
| 224056_at   | -0.00480138 | -0.15452691 | 0.877725593 | 0.934606695 |
| 224057_s_at | -0.02553328 | -0.65576358 | 0.514544205 | 0.685033353 |
| 224058_s_at | 0.007016186 | 0.175770978 | 0.861080211 | 0.92430289  |
| 224059_s_at | -0.10195465 | -2.66075729 | 0.010043912 | 0.035026156 |
| 224060_s_at | -0.05393918 | -1.0112793  | 0.316042647 | 0.497256749 |
| 224061_at   | 0.126653713 | 3.203713899 | 0.002195971 | 0.009866525 |
| 224062_x_at | -0.10103157 | -2.51167735 | 0.014793888 | 0.048022111 |
| 224063_at   | -0.00598843 | -0.23525472 | 0.814831689 | 0.8963412   |
| 224064_s_at | -0.00864744 | -0.23788495 | 0.812800622 | 0.894899535 |
| 224065_at   | 0.003190806 | 0.114801961 | 0.908994784 | 0.951846179 |
| 224066_s_at | 0.197784843 | 3.730159852 | 0.000434057 | 0.002540449 |
| 224067_at   | 0.027591354 | 1.15502479  | 0.25277113  | 0.425733836 |
| 224068_x_at | 0.007094631 | 0.143300357 | 0.886544885 | 0.939234631 |
| 224069_x_at | -0.00792278 | -0.26636236 | 0.790895702 | 0.880859132 |
| 224070_at   | -0.01998466 | -0.60746185 | 0.545892659 | 0.709973874 |
| 224071_at   | -0.08009469 | -1.93489163 | 0.057837848 | 0.142895263 |
| 224072_s_at | -0.0618323  | -1.64543979 | 0.105236214 | 0.226290265 |
| 224073_at   | -0.07189361 | -2.36198708 | 0.021521523 | 0.065373474 |
| 224074_at   | 0.000493574 | 0.017176544 | 0.986354157 | 0.993419155 |
| 224075_s_at | -0.03483874 | -0.92901098 | 0.35669668  | 0.539785597 |
| 224076_s_at | -0.00340015 | -0.07523626 | 0.940283143 | 0.968766062 |
| 224077_at   | -0.01878914 | -0.61573701 | 0.540453735 | 0.705987733 |
| 224078_at   | -0.09350563 | -2.69473195 | 0.009178068 | 0.032575144 |
| 224079_at   | -0.07932455 | -2.47818623 | 0.016107951 | 0.051590693 |
| 224080_at   | -0.01201052 | -0.54372081 | 0.588697471 | 0.743285233 |
| 224081_at   | -0.02548888 | -0.97852564 | 0.331839272 | 0.514341436 |
| 224082_at   | 0.078844872 | 2.442778634 | 0.017610803 | 0.055559932 |
| 224083_s_at | -0.02053872 | -0.93436736 | 0.353950983 | 0.537085436 |
| 224084_at   | 0.033658833 | 0.843411475 | 0.402429991 | 0.584700948 |
| 224085_at   | 0.013257739 | 0.424589417 | 0.67269177  | 0.803075664 |
| 224086_at   | -0.05241988 | -1.5752407  | 0.120587849 | 0.250467637 |
| 224087_at   | -0.03433256 | -0.82796993 | 0.411048809 | 0.593269607 |
| 224088_at   | -0.02675538 | -0.67671887 | 0.501248458 | 0.673576165 |
| 224089_at   | -0.00174578 | -0.04612221 | 0.963369758 | 0.981243759 |
| 224090_s_at | -0.07545375 | -2.09723351 | 0.040299652 | 0.107501017 |
| 224091_at   | -0.05752479 | -1.5068785  | 0.137217096 | 0.27596555  |
| 224092_at   | -0.05272304 | -1.86237759 | 0.067568504 | 0.161416057 |
| 224093_at   | 0.013673953 | 0.643232406 | 0.522583969 | 0.691415458 |
| 224094_at   | -0.05245886 | -1.74189253 | 0.08677718  | 0.195515514 |
| 224095_at   | -0.0145606  | -0.42141236 | 0.674996681 | 0.804765998 |
| 224096_at   | -0.05277651 | -1.58446239 | 0.118473955 | 0.247289898 |
| 224097_s_at | 0.144224077 | 2.905847368 | 0.005162055 | 0.020233517 |
| 224098_at   | 0.035093643 | 1.198639153 | 0.235496001 | 0.404468851 |
| 224099_at   | -0.05704252 | -1.46967239 | 0.147002279 | 0.289959516 |
| 224100_s_at | -0.23150483 | -4.63476392 | 2.04E-05    | 0.000194797 |
| 224101_x_at | -0.02486884 | -1.38212976 | 0.172180715 | 0.325415507 |
| 224102_at   | -0.3110341  | -1.75602415 | 0.084312429 | 0.191215421 |
| 224103_at   | -0.06207974 | -1.37754696 | 0.173584854 | 0.327311066 |
| 224104_at   | -0.00118757 | -0.0445016  | 0.964655963 | 0.981925119 |
| 224105_x_at | 0.191331524 | 3.638311248 | 0.000581387 | 0.003254834 |
| 224106_at   | -0.04246504 | -1.26834577 | 0.209693124 | 0.374235488 |
| 224107_at   | -0.00916847 | -0.37292592 | 0.710549907 | 0.829937444 |
| 224108_at   | -0.01400936 | -0.33283076 | 0.740450528 | 0.849325929 |
| 224109_at   | -0.04627444 | -1.33578013 | 0.186788996 | 0.344686974 |
| 224110_at   | -0.06941348 | -2.64765795 | 0.010397225 | 0.035990455 |
| 224111_x_at | -0.15764551 | -3.47366134 | 0.000972301 | 0.004980412 |
| 224112_at   | -0.03929808 | -1.17208133 | 0.245910291 | 0.417355514 |
| 224113_at   | 0.03074101  | 0.882372795 | 0.381182608 | 0.564006394 |
| 224114_at   | 0.016644099 | 0.524570288 | 0.601861923 | 0.752971841 |
| 224115_at   | -0.08464609 | -1.68834144 | 0.096664275 | 0.212113702 |
| 224116_at   | 0.039395267 | 1.231327603 | 0.223122038 | 0.390284545 |
| 224117_at   | -0.06155689 | -1.59627787 | 0.11580916  | 0.243106763 |
| 224118_at   | -0.09811385 | -2.19401477 | 0.032214885 | 0.090204101 |
| 224119_at   | -0.02511376 | -0.53777925 | 0.592767211 | 0.7461755   |
| 224120_at   | 0.006774482 | 0.223966749 | 0.823562641 | 0.901925104 |

|             |             |             |             |             |
|-------------|-------------|-------------|-------------|-------------|
| 224121_x_at | 0.052201284 | 1.497829623 | 0.13954821  | 0.279333929 |
| 224122_at   | -0.03742987 | -1.23311561 | 0.222459228 | 0.389555333 |
| 224123_at   | -0.00505588 | -0.14663206 | 0.88392603  | 0.937990838 |
| 224124_at   | 0.013920737 | 0.483919324 | 0.630247731 | 0.774053467 |
| 224125_at   | 0.072925241 | 1.634095469 | 0.107603519 | 0.23015096  |
| 224126_at   | 0.007846754 | 0.357723647 | 0.721836137 | 0.837342659 |
| 224127_at   | -0.01216302 | -0.39246919 | 0.696136319 | 0.820110828 |
| 224128_at   | -0.00822774 | -0.249999   | 0.803462974 | 0.889393353 |
| 224129_s_at | -0.07406008 | -1.28428025 | 0.204101056 | 0.367114114 |
| 224130_s_at | 0.00147566  | 0.036829437 | 0.970746251 | 0.985214037 |
| 224131_at   | -0.00627046 | -0.14034916 | 0.888865714 | 0.940441431 |
| 224132_at   | 0.042405247 | 1.479879127 | 0.14426494  | 0.286123368 |
| 224133_at   | 0.06529193  | 1.691572197 | 0.096042638 | 0.211070888 |
| 224134_at   | 0.05961589  | 1.351512301 | 0.181728738 | 0.3383257   |
| 224135_at   | 0.009224469 | 0.252785138 | 0.801319401 | 0.887812154 |
| 224136_at   | -0.05861918 | -1.57165785 | 0.121417273 | 0.251804211 |
| 224137_at   | 0.039107186 | 1.008520319 | 0.317353412 | 0.49870063  |
| 224138_at   | 0.018368295 | 0.597287003 | 0.55261812  | 0.715064391 |
| 224139_at   | 0.032165328 | 1.061931866 | 0.292626054 | 0.471111081 |
| 224140_at   | -0.02132574 | -0.58065062 | 0.56370366  | 0.724302646 |
| 224141_at   | 0.059497925 | 1.916658824 | 0.060164749 | 0.147360277 |
| 224142_s_at | -0.05132006 | -1.11332751 | 0.270116405 | 0.445811252 |
| 224143_at   | 0.019447014 | 0.549419752 | 0.584806395 | 0.740283863 |
| 224144_at   | -0.05502865 | -2.01774253 | 0.048207427 | 0.123905517 |
| 224145_s_at | -0.06776575 | -1.53785137 | 0.12947058  | 0.264371507 |
| 224146_s_at | -0.0034465  | -0.0755684  | 0.940020023 | 0.968605305 |
| 224147_at   | 0.003498205 | 0.126381395 | 0.899862911 | 0.946408274 |
| 224148_at   | -0.05861884 | -1.72862825 | 0.089144653 | 0.199541863 |
| 224149_x_at | -0.21958679 | -3.24456447 | 0.001945853 | 0.008905692 |
| 224150_s_at | -0.07441083 | -1.5499924  | 0.126530725 | 0.259936159 |
| 224151_s_at | 0.241997303 | 2.882602902 | 0.005506693 | 0.021328116 |
| 224152_s_at | -0.00753955 | -0.20403402 | 0.839034261 | 0.911121566 |
| 224153_s_at | 0.006593304 | 0.209849213 | 0.834513669 | 0.90879847  |
| 224154_at   | -0.01871665 | -0.48849726 | 0.627021834 | 0.771743447 |
| 224156_x_at | 0.399179742 | 5.271880184 | 2.04E-06    | 2.88E-05    |
| 224157_at   | 0.055498754 | 1.648250072 | 0.104656371 | 0.225379585 |
| 224158_s_at | -0.12513608 | -3.92301768 | 0.000232222 | 0.001498695 |
| 224159_x_at | 0.058120731 | 1.118492161 | 0.267923652 | 0.443278502 |
| 224160_s_at | 0.059345019 | 1.365577978 | 0.177293456 | 0.332365736 |
| 224162_s_at | -0.11699468 | -2.1802775  | 0.033267929 | 0.092480581 |
| 224163_s_at | -0.05434042 | -0.98813294 | 0.327152449 | 0.509410399 |
| 224164_at   | -0.45379315 | -6.15332111 | 7.36E-08    | 1.99E-06    |
| 224165_s_at | 0.045842644 | 0.861842661 | 0.392289224 | 0.575105098 |
| 224166_at   | 0.018380227 | 0.526986821 | 0.600193259 | 0.751789157 |
| 224167_at   | -0.06662058 | -2.20761369 | 0.031201417 | 0.087867076 |
| 224168_at   | 0.000903978 | 0.027297755 | 0.978315052 | 0.988954042 |
| 224169_at   | -0.13506404 | -3.90427027 | 0.000246948 | 0.001578234 |
| 224170_s_at | 0.012373626 | 0.284644125 | 0.776920883 | 0.872147581 |
| 224171_at   | -0.026771   | -0.63906328 | 0.525273403 | 0.693700509 |
| 224172_at   | 0.002263868 | 0.083721439 | 0.933563425 | 0.965452861 |
| 224173_s_at | -0.19561677 | -3.98123763 | 0.000191685 | 0.001271224 |
| 224174_at   | -0.03851178 | -1.06397807 | 0.291705872 | 0.470137716 |
| 224175_s_at | 0.048517956 | 1.634340302 | 0.107551975 | 0.230067193 |
| 224176_s_at | 0.068364162 | 1.850410717 | 0.06930037  | 0.164508005 |
| 224177_s_at | -0.00851114 | -0.17576794 | 0.861082588 | 0.92430289  |
| 224178_s_at | -0.04448455 | -0.93501502 | 0.353619923 | 0.53672887  |
| 224179_s_at | -0.02089659 | -0.72619151 | 0.470613714 | 0.647159018 |
| 224180_x_at | -0.00812203 | -0.24555412 | 0.806885873 | 0.891352729 |
| 224181_at   | -0.04562447 | -1.34571517 | 0.183581113 | 0.340680442 |
| 224182_x_at | -0.04839979 | -1.63954572 | 0.106460829 | 0.228122326 |
| 224183_at   | -0.01992266 | -0.72873944 | 0.469065178 | 0.645884121 |
| 224184_s_at | 0.222476262 | 5.045975371 | 4.67E-06    | 5.70E-05    |
| 224185_at   | 0.104422139 | 2.724221001 | 0.008482519 | 0.0305357   |
| 224186_s_at | -0.25369524 | -5.21755089 | 2.49E-06    | 3.39E-05    |
| 224187_x_at | -0.14084614 | -1.40789931 | 0.164446917 | 0.314725146 |
| 224188_s_at | -0.02039981 | -0.55491793 | 0.581064056 | 0.737168231 |
| 224189_x_at | 0.045703869 | 1.392862042 | 0.168926538 | 0.320989152 |
| 224190_x_at | -0.02723766 | -0.6911043  | 0.492230339 | 0.6661244   |
| 224191_x_at | 0.00549861  | 0.154424279 | 0.877806145 | 0.934650124 |
| 224192_at   | 0.007712881 | 0.183754268 | 0.854840964 | 0.920658177 |
| 224193_s_at | 0.002605464 | 0.10975304  | 0.912980447 | 0.953874185 |
| 224194_at   | -0.00435182 | -0.14368165 | 0.886245111 | 0.939158072 |
| 224195_at   | -0.04393912 | -1.11065043 | 0.271257967 | 0.447184994 |
| 224196_x_at | 6.51E-05    | 0.002048455 | 0.998372532 | 0.999150356 |
| 224197_s_at | 0.006465842 | 0.138811498 | 0.890075321 | 0.94117201  |

|             |             |             |             |             |
|-------------|-------------|-------------|-------------|-------------|
| 224198_at   | -0.04219824 | -1.15442061 | 0.253016642 | 0.425986806 |
| 224199_at   | -0.06211085 | -2.62919544 | 0.010914464 | 0.03741002  |
| 224200_s_at | -0.01509352 | -0.56486458 | 0.574323226 | 0.732106493 |
| 224201_s_at | -0.03144682 | -1.13765164 | 0.259898862 | 0.43394478  |
| 224202_at   | -0.01882726 | -0.44895593 | 0.655120347 | 0.791036624 |
| 224203_at   | -0.06389915 | -1.63041294 | 0.108381217 | 0.231360973 |
| 224204_x_at | -0.01695528 | -0.47068205 | 0.639616136 | 0.780915564 |
| 224206_x_at | -0.02795747 | -0.54458883 | 0.588104018 | 0.742829743 |
| 224207_x_at | -0.04642945 | -1.97804033 | 0.052634988 | 0.1327878   |
| 224208_at   | -0.11753052 | -2.63726529 | 0.010685562 | 0.036780588 |
| 224209_s_at | -0.37989784 | -2.36389989 | 0.021420619 | 0.065128942 |
| 224210_s_at | -0.03895187 | -1.02408654 | 0.310005856 | 0.490643166 |
| 224211_at   | -0.07748422 | -2.38420306 | 0.020375357 | 0.062520533 |
| 224212_s_at | -0.03353009 | -0.62276355 | 0.535857397 | 0.702138466 |
| 224213_at   | -0.0029677  | -0.08976313 | 0.928781719 | 0.962865057 |
| 224214_at   | 0.048587119 | 1.071934097 | 0.288147001 | 0.466299386 |
| 224215_s_at | 0.451497446 | 5.825622622 | 2.57E-07    | 5.27E-06    |
| 224216_at   | -0.04757711 | -1.36134559 | 0.178619257 | 0.334214388 |
| 224217_s_at | 0.073781022 | 1.994281583 | 0.050783292 | 0.129057596 |
| 224218_s_at | 0.472894557 | 5.267506541 | 2.07E-06    | 2.92E-05    |
| 224219_s_at | -0.05781704 | -1.62107503 | 0.110373712 | 0.234516589 |
| 224220_x_at | -0.01422704 | -0.47628143 | 0.635645975 | 0.777883076 |
| 224221_s_at | -0.10090796 | -3.25956596 | 0.001860932 | 0.008593592 |
| 224223_s_at | -0.01530498 | -0.401073   | 0.689825957 | 0.815277051 |
| 224224_s_at | -0.00670282 | -0.24133584 | 0.810137788 | 0.893352366 |
| 224225_s_at | -0.02631637 | -1.09422523 | 0.278336204 | 0.455113076 |
| 224226_at   | -0.04236522 | -1.72220686 | 0.090309805 | 0.201433638 |
| 224227_s_at | 0.05548589  | 2.024108651 | 0.047528189 | 0.122576596 |
| 224228_s_at | -0.03786259 | -1.27922187 | 0.205864063 | 0.369259781 |
| 224229_s_at | -0.07514971 | -1.77404582 | 0.081253788 | 0.185899699 |
| 224230_at   | -0.00350095 | -0.10509524 | 0.916659353 | 0.955796271 |
| 224231_at   | 0.03736214  | 1.902437903 | 0.062034478 | 0.151004625 |
| 224232_s_at | -0.13738783 | -2.75087002 | 0.00789589  | 0.0287739   |
| 224233_s_at | -0.00585287 | -0.15557023 | 0.876906759 | 0.934024092 |
| 224234_at   | -0.0541473  | -1.6591569  | 0.102430573 | 0.221675811 |
| 224235_at   | -0.03477216 | -1.20427717 | 0.233326928 | 0.40199873  |
| 224236_s_at | 0.006032391 | 0.177476074 | 0.859746851 | 0.923523833 |
| 224237_at   | -0.0145468  | -0.44302815 | 0.659377533 | 0.794066434 |
| 224238_at   | -0.03841166 | -1.20916807 | 0.231457089 | 0.399732601 |
| 224239_at   | 0.061489238 | 2.07826387  | 0.042076556 | 0.111337207 |
| 224240_s_at | 0.019098046 | 0.641833163 | 0.523485789 | 0.692184253 |
| 224241_s_at | 0.076657412 | 2.119500054 | 0.038297513 | 0.103294657 |
| 224242_at   | -0.06956674 | -1.60963207 | 0.112855734 | 0.238407472 |
| 224243_at   | -0.02766298 | -0.85062694 | 0.398441006 | 0.58075551  |
| 224244_s_at | -0.04735829 | -1.49734248 | 0.139674586 | 0.279511781 |
| 224245_at   | 0.016121713 | 0.447051219 | 0.656487021 | 0.792151788 |
| 224246_at   | -0.02177235 | -0.67525791 | 0.502169319 | 0.674367524 |
| 224247_s_at | -0.18822602 | -2.778971   | 0.007317857 | 0.027007863 |
| 224248_x_at | -0.03387762 | -1.03173855 | 0.306436535 | 0.486579322 |
| 224249_at   | -0.04419646 | -1.02228966 | 0.310848086 | 0.49164535  |
| 224250_s_at | -0.12901401 | -2.61871939 | 0.011218284 | 0.038286946 |
| 224251_at   | -0.00039277 | -0.00919017 | 0.992698646 | 0.996780154 |
| 224252_s_at | 0.101587332 | 2.773658561 | 0.007424056 | 0.027328548 |
| 224253_at   | -0.06728008 | -2.36772677 | 0.021220012 | 0.064637731 |
| 224254_x_at | 0.166930178 | 2.452124497 | 0.017202338 | 0.05448667  |
| 224256_at   | -0.08244018 | -1.8123557  | 0.075058098 | 0.174713361 |
| 224257_s_at | -0.08586256 | -2.08879868 | 0.041081531 | 0.109254136 |
| 224258_at   | -0.06745352 | -1.80256545 | 0.076602552 | 0.177476477 |
| 224259_at   | -0.0032852  | -0.11985239 | 0.905010284 | 0.949676441 |
| 224260_at   | -0.01924184 | -0.57877285 | 0.564961771 | 0.725366184 |
| 224261_at   | 0.130176828 | 2.724756097 | 0.008470356 | 0.030504203 |
| 224262_at   | -0.02003619 | -0.57605929 | 0.566782306 | 0.726789833 |
| 224263_x_at | 0.042508346 | 1.218766932 | 0.227819141 | 0.395328792 |
| 224264_x_at | 0.102926186 | 2.949457232 | 0.004568813 | 0.018327743 |
| 224265_s_at | 0.024749862 | 0.71851025  | 0.475299566 | 0.651240183 |
| 224267_x_at | 0.028255935 | 0.786874238 | 0.434528162 | 0.615231857 |
| 224268_x_at | 0.032208003 | 0.985085935 | 0.328634103 | 0.511156397 |
| 224269_at   | -0.05227741 | -1.12845066 | 0.263731071 | 0.438589839 |
| 224270_at   | -0.02824211 | -1.20750943 | 0.232089976 | 0.400469681 |
| 224271_x_at | -0.00528149 | -0.16913    | 0.866277193 | 0.927684911 |
| 224272_at   | 0.013130742 | 0.46890687  | 0.640877025 | 0.781763908 |
| 224273_at   | -0.05687616 | -1.59859812 | 0.115291585 | 0.242282011 |
| 224274_at   | -0.01608061 | -0.51769525 | 0.606620969 | 0.756430627 |
| 224275_at   | 0.361139199 | 3.909111074 | 0.000243062 | 0.00155763  |
| 224276_at   | -0.06172935 | -2.05340794 | 0.044507478 | 0.116479956 |

|             |             |             |             |             |
|-------------|-------------|-------------|-------------|-------------|
| 224277_at   | -0.03335043 | -1.33698777 | 0.186396813 | 0.344176432 |
| 224278_at   | -0.00399891 | -0.18315913 | 0.855305772 | 0.920825919 |
| 224279_s_at | -0.00772735 | -0.1879675  | 0.851551886 | 0.918571751 |
| 224280_s_at | -0.08848129 | -2.2133192  | 0.030784635 | 0.086874212 |
| 224281_s_at | -0.35654448 | -4.85632324 | 9.28E-06    | 0.000100452 |
| 224282_s_at | -0.01029822 | -0.22407608 | 0.823477967 | 0.901901723 |
| 224283_x_at | 0.032918512 | 0.920543274 | 0.361065254 | 0.544167004 |
| 224284_x_at | -0.06059498 | -1.64041264 | 0.106279986 | 0.22788361  |
| 224285_at   | -0.09665639 | -2.32081339 | 0.023798867 | 0.07094577  |
| 224286_at   | 0.009550777 | 0.352828931 | 0.725483397 | 0.839596398 |
| 224287_at   | 0.025081834 | 0.713517643 | 0.478359269 | 0.653905006 |
| 224288_x_at | -0.07839927 | -2.40595574 | 0.019306325 | 0.059902684 |
| 224289_s_at | -0.10339386 | -3.54155842 | 0.000787714 | 0.004178079 |
| 224290_at   | 0.019945438 | 0.595844436 | 0.553575005 | 0.71597089  |
| 224291_at   | 0.006962693 | 0.248765516 | 0.804412469 | 0.88976122  |
| 224292_at   | -0.01095196 | -0.26781331 | 0.789783991 | 0.880312902 |
| 224293_at   | -0.01158846 | -0.25731782 | 0.797835364 | 0.885488678 |
| 224294_at   | -0.02312849 | -0.72643316 | 0.470466722 | 0.64706683  |
| 224295_at   | -0.07289716 | -1.92039431 | 0.059681639 | 0.146409694 |
| 224296_x_at | 0.022032978 | 1.221771859 | 0.226688914 | 0.394183735 |
| 224297_s_at | -0.03089338 | -0.67628567 | 0.501521414 | 0.673801144 |
| 224298_s_at | 0.160189332 | 4.345495009 | 5.61E-05    | 0.000453904 |
| 224299_x_at | -0.12581662 | -2.5723449  | 0.01265785  | 0.042279868 |
| 224300_x_at | -0.07769181 | -1.79734462 | 0.077436969 | 0.179010656 |
| 224301_x_at | 0.069912766 | 1.528707894 | 0.131720319 | 0.267702681 |
| 224302_s_at | -0.17411376 | -2.65030949 | 0.010324805 | 0.035777244 |
| 224303_x_at | -0.02570901 | -0.90448466 | 0.369444154 | 0.552657588 |
| 224304_x_at | -0.01258722 | -0.33432036 | 0.739332107 | 0.848899322 |
| 224305_s_at | 0.058209751 | 1.5018351   | 0.138512515 | 0.277870605 |
| 224306_at   | -0.03821807 | -1.0144399  | 0.314545568 | 0.495773956 |
| 224307_x_at | -0.01686917 | -0.46260864 | 0.645359134 | 0.78482695  |
| 224308_s_at | 0.114740907 | 3.161150006 | 0.002488531 | 0.010950908 |
| 224309_s_at | 0.12158297  | 2.310607006 | 0.02439556  | 0.072338533 |
| 224310_s_at | -0.32568942 | -5.93241196 | 1.71E-07    | 3.83E-06    |
| 224311_s_at | -0.23995176 | -2.49241667 | 0.015537251 | 0.050064837 |
| 224312_x_at | 0.191927622 | 4.691255352 | 1.67E-05    | 0.000164136 |
| 224313_at   | -0.10750619 | -2.73073135 | 0.008335626 | 0.030081381 |
| 224314_s_at | -0.07102288 | -2.01554784 | 0.048443522 | 0.124370283 |
| 224315_at   | -0.04475024 | -1.93931601 | 0.05728491  | 0.141877374 |
| 224316_at   | 0.038466181 | 1.173055893 | 0.245522366 | 0.416887109 |
| 224318_s_at | 0.173824797 | 4.905209529 | 7.78E-06    | 8.67E-05    |
| 224319_s_at | -0.03237275 | -0.96972719 | 0.336170373 | 0.518965499 |
| 224320_s_at | 0.19013185  | 3.788466349 | 0.000359868 | 0.002166671 |
| 224321_at   | -0.00843262 | -0.29056361 | 0.772411526 | 0.869777921 |
| 224322_at   | 0.033568335 | 1.023514047 | 0.310274026 | 0.490911133 |
| 224323_s_at | -0.04639151 | -0.88259386 | 0.381064101 | 0.563887055 |
| 224324_at   | -0.04656915 | -1.13425296 | 0.26130978  | 0.435633269 |
| 224325_at   | 0.071575382 | 1.649950718 | 0.104306743 | 0.224836173 |
| 224326_s_at | -0.04965128 | -1.1207502  | 0.266968909 | 0.442230336 |
| 224327_s_at | -0.34582203 | -7.25030604 | 1.06E-09    | 9.69E-08    |
| 224328_s_at | 0.005478082 | 0.183253793 | 0.855231835 | 0.920807754 |
| 224329_s_at | -0.37893035 | -7.46542325 | 4.58E-10    | 5.52E-08    |
| 224330_s_at | 0.049916094 | 0.975231075 | 0.333456695 | 0.516110034 |
| 224331_s_at | -0.09248181 | -1.77826313 | 0.080551519 | 0.184691592 |
| 224332_s_at | 0.085907268 | 1.571380843 | 0.12148159  | 0.251875513 |
| 224333_s_at | 0.176467285 | 3.777965081 | 0.000372264 | 0.002228995 |
| 224334_s_at | -0.03924605 | -1.14757153 | 0.255811709 | 0.429221238 |
| 224335_s_at | -0.06379983 | -0.91090731 | 0.366078234 | 0.549387791 |
| 224336_s_at | 0.003891798 | 0.070682221 | 0.943891478 | 0.971028657 |
| 224337_s_at | -0.05343184 | -1.56279331 | 0.123489075 | 0.255094695 |
| 224338_s_at | -0.03137387 | -0.91131615 | 0.365864641 | 0.549177891 |
| 224339_s_at | 0.052923411 | 1.403058406 | 0.165878902 | 0.316773912 |
| 224340_at   | -0.05303562 | -1.58563128 | 0.118208153 | 0.246855697 |
| 224341_x_at | 0.397323239 | 3.661177334 | 0.00054078  | 0.003060861 |
| 224342_x_at | -0.01643787 | -0.49606981 | 0.621701784 | 0.767626418 |
| 224343_x_at | 0.063781179 | 1.3782693   | 0.173362954 | 0.327041372 |
| 224344_at   | -0.0233533  | -0.68820895 | 0.494038209 | 0.667614671 |
| 224345_x_at | -0.35442118 | -4.9146896  | 7.52E-06    | 8.44E-05    |
| 224346_at   | 0.100397313 | 2.546548404 | 0.013529371 | 0.044640433 |
| 224347_x_at | 0.062414802 | 2.161056573 | 0.03479199  | 0.095824099 |
| 224348_s_at | -0.00982587 | -0.27851398 | 0.78159885  | 0.875189077 |
| 224349_at   | -0.0627643  | -2.50439178 | 0.015071209 | 0.048808873 |
| 224350_at   | -0.09514067 | -2.35827474 | 0.021718568 | 0.065837769 |
| 224351_at   | 0.01916426  | 0.712558142 | 0.478948558 | 0.654432216 |
| 224352_s_at | 0.251965406 | 2.85150165  | 0.006001174 | 0.022907797 |

|             |             |             |             |             |
|-------------|-------------|-------------|-------------|-------------|
| 224354_at   | 0.022440056 | 1.006775626 | 0.318184182 | 0.499494903 |
| 224355_s_at | -0.0706132  | -1.80499337 | 0.076217079 | 0.176731163 |
| 224356_x_at | 0.1237525   | 1.385920468 | 0.171025867 | 0.323890337 |
| 224357_s_at | -0.01145601 | -0.49324532 | 0.623683762 | 0.768993714 |
| 224358_s_at | 0.005799188 | 0.167475728 | 0.867572697 | 0.928285546 |
| 224359_s_at | 0.072588389 | 2.484542057 | 0.01585076  | 0.050912904 |
| 224360_s_at | -0.29660213 | -5.14298976 | 3.28E-06    | 4.25E-05    |
| 224361_s_at | 0.345627148 | 4.459167984 | 3.78E-05    | 0.000327054 |
| 224362_at   | 0.049288907 | 1.401446597 | 0.16635782  | 0.317512115 |
| 224363_at   | -0.01017477 | -0.33103806 | 0.741797265 | 0.850257838 |
| 224364_s_at | 0.042384661 | 0.583856676 | 0.561558799 | 0.722874119 |
| 224365_s_at | 0.000219172 | 0.00720981  | 0.994271957 | 0.997329196 |
| 224366_s_at | -0.04226047 | -0.98422302 | 0.329054516 | 0.511467688 |
| 224367_at   | -0.5183178  | -4.58812496 | 2.41E-05    | 0.000223233 |
| 224368_s_at | -0.65192642 | -4.32889481 | 5.93E-05    | 0.000475057 |
| 224369_s_at | 0.060185413 | 1.369958008 | 0.175929337 | 0.330559226 |
| 224370_s_at | 0.504129347 | 3.900448958 | 0.000250058 | 0.001594007 |
| 224371_at   | -0.00072252 | -0.02339454 | 0.981415084 | 0.990591839 |
| 224372_at   | 0.029177277 | 1.517727386 | 0.134463002 | 0.271882572 |
| 224373_s_at | 0.031540965 | 1.232276847 | 0.222769975 | 0.38991289  |
| 224374_s_at | 0.063338891 | 1.480409579 | 0.144123781 | 0.285944244 |
| 224375_at   | 0.055979751 | 1.397481368 | 0.167540549 | 0.319128936 |
| 224376_s_at | -0.17918264 | -2.93633736 | 0.00474027  | 0.018874924 |
| 224377_s_at | -0.24371722 | -3.16242312 | 0.002479273 | 0.010917087 |
| 224378_x_at | -0.06066658 | -1.20345453 | 0.233642508 | 0.402371814 |
| 224379_at   | 0.012058487 | 0.399293318 | 0.691129449 | 0.816407394 |
| 224380_s_at | -0.06067514 | -1.72872137 | 0.089127848 | 0.199534227 |
| 224383_at   | -0.01061347 | -0.40227057 | 0.688949353 | 0.81466767  |
| 224384_s_at | -0.07539556 | -1.68036833 | 0.09821253  | 0.214646896 |
| 224385_s_at | 0.014832491 | 0.425202392 | 0.672247427 | 0.802744666 |
| 224387_at   | 0.116259365 | 3.404989989 | 0.001200332 | 0.005937489 |
| 224388_s_at | 0.086303173 | 2.431667705 | 0.018107741 | 0.056862785 |
| 224389_s_at | 0.000744281 | 0.023054301 | 0.981685329 | 0.990756282 |
| 224390_s_at | -0.07859017 | -2.43262066 | 0.018064631 | 0.056751294 |
| 224391_s_at | -0.01772626 | -0.35335382 | 0.725091975 | 0.839333071 |
| 224392_s_at | -0.07197812 | -1.48708605 | 0.142356377 | 0.283377162 |
| 224393_s_at | -0.40345896 | -6.54840347 | 1.61E-08    | 6.34E-07    |
| 224394_at   | -0.0905757  | -2.9322487  | 0.004794912 | 0.019060232 |
| 224395_s_at | -0.24028453 | -4.38120141 | 4.96E-05    | 0.000408599 |
| 224396_s_at | -0.08248526 | -1.86322441 | 0.067447347 | 0.161169697 |
| 224397_s_at | -0.25429387 | -5.52417848 | 7.98E-07    | 1.33E-05    |
| 224398_at   | -0.00906287 | -0.24363725 | 0.808363186 | 0.892320189 |
| 224399_at   | -0.03141688 | -0.80101253 | 0.426362134 | 0.607678556 |
| 224400_s_at | 0.11572339  | 1.348401471 | 0.182720975 | 0.339563632 |
| 224401_s_at | -0.02508106 | -0.64735328 | 0.519932804 | 0.689097054 |
| 224402_s_at | -0.05124137 | -1.22638026 | 0.224963557 | 0.392200948 |
| 224403_at   | 0.031763837 | 0.892559658 | 0.375745836 | 0.558606643 |
| 224404_s_at | -0.04775695 | -1.24118838 | 0.219484669 | 0.386341426 |
| 224405_at   | -0.03969129 | -1.56237498 | 0.123587542 | 0.255274503 |
| 224406_s_at | -0.00167825 | -0.0464795  | 0.963086202 | 0.98113172  |
| 224407_s_at | -0.1990654  | -5.05095992 | 4.59E-06    | 5.63E-05    |
| 224408_at   | -0.00914036 | -0.28414664 | 0.777300214 | 0.872311137 |
| 224409_s_at | 0.000248243 | 0.005785756 | 0.995403324 | 0.997864832 |
| 224410_s_at | -0.52394892 | -5.64537748 | 5.07E-07    | 9.15E-06    |
| 224411_at   | -0.05197108 | -1.71917854 | 0.090863635 | 0.202365953 |
| 224412_s_at | 0.158345546 | 2.929671045 | 0.00482966  | 0.01917278  |
| 224413_s_at | -0.05109764 | -0.79156717 | 0.431807383 | 0.612645574 |
| 224414_s_at | 0.192069962 | 4.516440462 | 3.10E-05    | 0.000275624 |
| 224415_s_at | 0.059405845 | 1.312793411 | 0.194373643 | 0.354424597 |
| 224416_s_at | 0.024881693 | 0.757338194 | 0.451883615 | 0.631250465 |
| 224417_at   | 0.030628809 | 0.641565244 | 0.523658557 | 0.692291393 |
| 224418_x_at | -0.01032097 | -0.32990487 | 0.742648974 | 0.850845489 |
| 224419_x_at | 0.022824665 | 0.751593106 | 0.455305576 | 0.634247639 |
| 224421_x_at | 0.026314909 | 0.839058935 | 0.404848077 | 0.587164377 |
| 224422_x_at | 0.00077228  | 0.028385153 | 0.97745147  | 0.988644845 |
| 224423_x_at | -0.05786713 | -1.87535246 | 0.065732172 | 0.157957965 |
| 224424_x_at | -0.13731623 | -3.49137221 | 0.000920539 | 0.004756705 |
| 224425_x_at | -0.04567888 | -1.23742098 | 0.220869173 | 0.387781805 |
| 224426_s_at | -0.0461958  | -1.51749753 | 0.134520896 | 0.271987328 |
| 224427_s_at | -0.01878528 | -0.46045945 | 0.646891637 | 0.785792592 |
| 224428_s_at | 0.224839858 | 2.910135545 | 0.005100702 | 0.020033445 |
| 224429_x_at | -0.00374646 | -0.10621631 | 0.915773715 | 0.955200062 |
| 224430_s_at | -0.12159932 | -2.38385437 | 0.020392917 | 0.062551064 |
| 224431_s_at | 0.016515983 | 0.503908651 | 0.61621594  | 0.763979216 |
| 224432_at   | 0.00166605  | 0.060419958 | 0.952026871 | 0.975446134 |

|             |             |             |             |             |
|-------------|-------------|-------------|-------------|-------------|
| 224433_s_at | -0.51688464 | -8.55161804 | 6.81E-12    | 4.61E-09    |
| 224434_s_at | 0.038143916 | 1.043485947 | 0.301011452 | 0.480477352 |
| 224435_at   | -0.12763666 | -1.64016976 | 0.106330627 | 0.227919826 |
| 224436_s_at | 0.260220046 | 2.630195126 | 0.010885868 | 0.03732803  |
| 224437_s_at | -0.11330187 | -1.70619241 | 0.093270439 | 0.206491429 |
| 224438_at   | 0.012757077 | 0.298841869 | 0.766118537 | 0.865679856 |
| 224439_x_at | -0.30554368 | -5.51636131 | 8.22E-07    | 1.36E-05    |
| 224441_s_at | 0.037320232 | 0.863353154 | 0.391465262 | 0.574239849 |
| 224442_at   | -0.01673845 | -0.54902121 | 0.585078107 | 0.740493621 |
| 224443_at   | 0.115889339 | 3.108771308 | 0.002898763 | 0.012465268 |
| 224444_s_at | -0.01066499 | -0.30306744 | 0.762912395 | 0.863672951 |
| 224445_s_at | 0.348726073 | 5.311532016 | 1.76E-06    | 2.56E-05    |
| 224446_at   | 0.085662193 | 2.010255678 | 0.049016929 | 0.125525131 |
| 224447_s_at | -0.24308001 | -5.09370577 | 3.92E-06    | 4.94E-05    |
| 224448_s_at | -0.17263492 | -3.24255337 | 0.001957511 | 0.008948967 |
| 224449_at   | -0.00173551 | -0.04638545 | 0.963160843 | 0.981137201 |
| 224450_s_at | 0.024685423 | 0.620749816 | 0.537172596 | 0.703264478 |
| 224451_x_at | 0.027733557 | 0.703189934 | 0.484723472 | 0.659580484 |
| 224452_s_at | -0.19396031 | -3.91183371 | 0.000240902 | 0.00154645  |
| 224453_s_at | 0.040394021 | 1.567985114 | 0.122272249 | 0.25316615  |
| 224454_at   | -0.00399318 | -0.13881622 | 0.890071608 | 0.94117201  |
| 224455_s_at | -0.0254544  | -0.71333277 | 0.478472781 | 0.654022068 |
| 224456_s_at | -0.00240601 | -0.08301257 | 0.934124624 | 0.965731266 |
| 224457_at   | -0.06838319 | -1.55982353 | 0.124189463 | 0.25623009  |
| 224458_at   | -0.39219778 | -4.09540777 | 0.000131075 | 0.000927049 |
| 224459_at   | 0.004310472 | 0.174760486 | 0.861870592 | 0.924797016 |
| 224460_s_at | -0.16958928 | -4.79305988 | 1.16E-05    | 0.000120994 |
| 224461_s_at | -0.02410341 | -0.66358257 | 0.5095613   | 0.680491055 |
| 224462_s_at | -0.17196847 | -3.45468915 | 0.001030811 | 0.005227393 |
| 224463_s_at | 0.455164107 | 2.697116798 | 0.009119934 | 0.032397114 |
| 224464_s_at | 0.073114109 | 2.532407262 | 0.014029869 | 0.045964874 |
| 224465_s_at | -0.01368214 | -0.52800775 | 0.599488935 | 0.751201691 |
| 224466_s_at | 0.000643499 | 0.019102302 | 0.984824426 | 0.992709774 |
| 224467_s_at | -0.18920671 | -4.74583363 | 1.38E-05    | 0.000139365 |
| 224468_s_at | 0.021754259 | 0.637517646 | 0.526272312 | 0.694588688 |
| 224469_s_at | -0.01384272 | -0.37713286 | 0.707437992 | 0.827643747 |
| 224470_at   | -0.08084652 | -2.38328349 | 0.020421694 | 0.062615694 |
| 224471_s_at | -0.24713923 | -3.96918274 | 0.000199474 | 0.001314302 |
| 224472_x_at | 0.089149095 | 2.174739583 | 0.033700916 | 0.093451718 |
| 224473_x_at | 0.184776702 | 4.327500706 | 5.96E-05    | 0.000476654 |
| 224474_x_at | -0.01835621 | -0.46179463 | 0.645939391 | 0.785161905 |
| 224475_at   | 0.046873819 | 1.261352093 | 0.212183122 | 0.377293231 |
| 224476_s_at | -0.02257873 | -0.61451592 | 0.54125456  | 0.706580891 |
| 224477_s_at | 0.089864452 | 2.829789406 | 0.006370362 | 0.024070236 |
| 224478_s_at | 0.045365125 | 0.960972714 | 0.340516693 | 0.523399781 |
| 224479_s_at | -0.16276879 | -3.20296847 | 0.002200804 | 0.009880294 |
| 224480_s_at | -0.0005217  | -0.01762382 | 0.985998859 | 0.993185578 |
| 224481_s_at | -0.10301699 | -1.76261153 | 0.083183513 | 0.189106138 |
| 224482_s_at | -0.20336631 | -2.32622757 | 0.023487641 | 0.070186523 |
| 224483_s_at | 0.008219837 | 0.272173915 | 0.786445553 | 0.878212599 |
| 224484_s_at | -0.23969938 | -4.84548231 | 9.65E-06    | 0.000103689 |
| 224485_s_at | -0.00764588 | -0.18778917 | 0.851691046 | 0.918571751 |
| 224486_s_at | -0.26026811 | -7.17041644 | 1.44E-09    | 1.18E-07    |
| 224487_at   | -0.01876972 | -0.72530523 | 0.471153039 | 0.647574344 |
| 224488_s_at | -0.11075123 | -2.45291997 | 0.017167969 | 0.054400941 |
| 224489_at   | -0.00841285 | -0.14355109 | 0.886347754 | 0.939164447 |
| 224490_s_at | 0.048064667 | 1.20169594  | 0.234318176 | 0.403147056 |
| 224491_at   | -0.0337596  | -1.02048988 | 0.311693228 | 0.492615947 |
| 224492_s_at | 0.119196628 | 2.151860302 | 0.035542568 | 0.097422168 |
| 224493_x_at | 0.026707302 | 0.733810471 | 0.465991822 | 0.643535829 |
| 224494_x_at | 0.132763409 | 3.708355793 | 0.000465396 | 0.002695282 |
| 224495_at   | 0.16986888  | 2.4416928   | 0.017658821 | 0.055672122 |
| 224496_s_at | 0.312455851 | 3.531481386 | 0.000812827 | 0.004286862 |
| 224497_x_at | 0.079593764 | 1.900714288 | 0.062264411 | 0.151481821 |
| 224498_x_at | -0.06497315 | -2.22465769 | 0.029970899 | 0.085050443 |
| 224499_s_at | 0.000745115 | 0.023326728 | 0.981468948 | 0.990623325 |
| 224500_s_at | -0.05314281 | -1.96602073 | 0.054042373 | 0.135605062 |
| 224501_at   | 0.003834256 | 0.098339318 | 0.921998661 | 0.959125836 |
| 224502_s_at | -0.09049898 | -1.71644499 | 0.091365959 | 0.203292216 |
| 224503_s_at | 0.022952216 | 0.781669536 | 0.437557491 | 0.618037337 |
| 224504_s_at | 0.134218142 | 3.746125254 | 0.000412402 | 0.002434749 |
| 224505_s_at | -0.02444133 | -0.65323962 | 0.516158214 | 0.686123045 |
| 224506_s_at | -0.07608643 | -2.47983431 | 0.016040902 | 0.051415418 |
| 224507_s_at | -0.00883682 | -0.2434561  | 0.808502832 | 0.892342098 |
| 224508_at   | 0.004104401 | 0.124963638 | 0.90098029  | 0.947182234 |

|             |             |             |             |             |
|-------------|-------------|-------------|-------------|-------------|
| 224509_s_at | -0.05420218 | -0.99278539 | 0.324898721 | 0.5071078   |
| 224510_s_at | -0.0610804  | -1.93236338 | 0.058155856 | 0.143446189 |
| 224511_s_at | 0.01244783  | 0.252483665 | 0.801551271 | 0.888044967 |
| 224512_s_at | -0.27551938 | -4.05290283 | 0.000151088 | 0.001039796 |
| 224513_s_at | -0.17907598 | -3.34907338 | 0.001422547 | 0.006856825 |
| 224514_x_at | 0.146694317 | 3.99421806  | 0.000183625 | 0.001227059 |
| 224515_at   | -0.00376642 | -0.108225   | 0.914187139 | 0.954254927 |
| 224516_s_at | 0.65804535  | 6.746775339 | 7.48E-09    | 3.64E-07    |
| 224517_at   | 0.01821146  | 0.346760321 | 0.730014252 | 0.842586631 |
| 224518_s_at | 0.193121799 | 2.355697212 | 0.021856324 | 0.066210453 |
| 224519_at   | -0.19373503 | -4.53211669 | 2.93E-05    | 0.000263271 |
| 224520_s_at | 0.026388895 | 0.763619019 | 0.448159675 | 0.627656676 |
| 224521_s_at | 0.03625756  | 0.981162472 | 0.330548511 | 0.51301385  |
| 224522_s_at | 0.290340486 | 4.260883178 | 7.49E-05    | 0.000578564 |
| 224523_s_at | -0.26506786 | -3.18308791 | 0.002333454 | 0.010375758 |
| 224524_s_at | 0.11852626  | 2.121661318 | 0.038107877 | 0.102894951 |
| 224525_s_at | -0.55488012 | -5.77953428 | 3.06E-07    | 6.07E-06    |
| 224526_at   | 0.008690706 | 0.35106232  | 0.72680135  | 0.84046279  |
| 224527_at   | 0.068043696 | 1.904777259 | 0.061723558 | 0.150366563 |
| 224528_s_at | -0.08821763 | -2.20808977 | 0.03116645  | 0.087807539 |
| 224529_s_at | 0.015328353 | 0.45883645  | 0.648049956 | 0.786466225 |
| 224530_s_at | -0.47272696 | -6.07124426 | 1.01E-07    | 2.53E-06    |
| 224531_at   | -0.03297725 | -0.76812068 | 0.445501647 | 0.625666854 |
| 224532_at   | -0.00489687 | -0.11810528 | 0.90638838  | 0.950319277 |
| 224533_s_at | -0.05082807 | -1.56375759 | 0.123262342 | 0.254720515 |
| 224534_at   | -0.29021239 | -4.63439737 | 2.05E-05    | 0.000195008 |
| 224535_s_at | -0.0129004  | -0.32560266 | 0.745885471 | 0.852974935 |
| 224536_s_at | -0.31272087 | -5.74273776 | 3.51E-07    | 6.80E-06    |
| 224537_at   | 0.004586505 | 0.159222651 | 0.874041281 | 0.932239193 |
| 224538_s_at | 0.070042994 | 1.546827549 | 0.127291884 | 0.261079802 |
| 224539_s_at | -0.21893662 | -4.74248383 | 1.39E-05    | 0.000140784 |
| 224540_at   | -0.07695773 | -2.1217551  | 0.038099666 | 0.102878998 |
| 224542_s_at | 0.068906037 | 1.446615668 | 0.153335715 | 0.298926053 |
| 224543_at   | -0.00178062 | -0.05790352 | 0.954022588 | 0.976304669 |
| 224545_at   | -0.01954166 | -0.63082568 | 0.530608632 | 0.697777284 |
| 224546_at   | -0.00566019 | -0.1686067  | 0.866686964 | 0.927869789 |
| 224547_at   | -0.07004257 | -1.74406298 | 0.086394789 | 0.194870088 |
| 224548_at   | -0.03242894 | -0.90946617 | 0.36683178  | 0.55000154  |
| 224549_x_at | 0.099784253 | 1.275456057 | 0.207183923 | 0.370942388 |
| 224550_s_at | 0.579769172 | 3.456882757 | 0.001023879 | 0.005200501 |
| 224551_s_at | -0.20782997 | -4.15113331 | 0.000108685 | 0.000790197 |
| 224552_s_at | -0.21394634 | -5.2428828  | 2.27E-06    | 3.14E-05    |
| 224553_s_at | 0.025365072 | 0.645050154 | 0.521413644 | 0.69025529  |
| 224554_at   | 0.063473125 | 1.722030991 | 0.090341892 | 0.201485095 |
| 224555_x_at | -0.0423304  | -1.35494683 | 0.180638022 | 0.336897587 |
| 224556_s_at | -0.01166154 | -0.30459482 | 0.761754514 | 0.862864852 |
| 224557_x_at | -0.0100655  | -0.38350221 | 0.702736074 | 0.824512267 |
| 224558_s_at | 0.12122771  | 1.388545152 | 0.170229744 | 0.322724515 |
| 224559_at   | 0.174486213 | 1.787542347 | 0.079024131 | 0.181870667 |
| 224560_at   | 0.313360132 | 2.852814339 | 0.0059795   | 0.022840669 |
| 224561_s_at | -0.04784872 | -0.62515785 | 0.534295817 | 0.700934883 |
| 224562_at   | 0.617990306 | 11.23901572 | 2.99E-16    | 1.34E-11    |
| 224563_at   | 0.176932215 | 3.686438997 | 0.000499073 | 0.002860294 |
| 224564_s_at | -0.2009275  | -2.717185   | 0.008643938 | 0.030994455 |
| 224565_at   | 0.757692462 | 5.063022889 | 4.39E-06    | 5.42E-05    |
| 224566_at   | 0.570419746 | 3.321747441 | 0.001544791 | 0.007342315 |
| 224567_x_at | 0.423674784 | 2.893922004 | 0.005336291 | 0.020793748 |
| 224568_x_at | 0.217516902 | 1.773425832 | 0.081357457 | 0.186090766 |
| 224569_s_at | 0.674332293 | 7.080617258 | 2.05E-09    | 1.48E-07    |
| 224570_s_at | 0.220036636 | 3.354120214 | 0.001400995 | 0.006767538 |
| 224571_at   | 0.467268855 | 5.421215046 | 1.17E-06    | 1.81E-05    |
| 224572_s_at | 0.166484462 | 4.063132232 | 0.000146018 | 0.001012073 |
| 224573_at   | -0.24099666 | -3.82122063 | 0.000323694 | 0.001984026 |
| 224574_at   | 0.013347913 | 0.283683806 | 0.777653168 | 0.87253651  |
| 224575_at   | -0.12793244 | -2.73450464 | 0.008251561 | 0.029838885 |
| 224576_at   | 0.136066278 | 2.62097933  | 0.011152099 | 0.038098883 |
| 224577_at   | -0.04404722 | -1.52610068 | 0.132367483 | 0.26871531  |
| 224578_at   | 0.062052244 | 1.547268968 | 0.127185503 | 0.260957418 |
| 224579_at   | -0.15049982 | -1.76607439 | 0.082595118 | 0.188084227 |
| 224580_at   | 0.044230784 | 1.095990808 | 0.27756922  | 0.454217113 |
| 224581_s_at | 0.126758483 | 2.643216167 | 0.010519579 | 0.036326768 |
| 224582_s_at | 0.010122645 | 0.071018512 | 0.943624981 | 0.970855038 |
| 224583_at   | 0.6034778   | 4.997613448 | 5.57E-06    | 6.58E-05    |
| 224584_at   | 0.062225078 | 0.89637466  | 0.373722457 | 0.556821044 |
| 224585_x_at | -0.08090993 | -1.16386727 | 0.249197426 | 0.421669369 |

|             |             |             |             |             |
|-------------|-------------|-------------|-------------|-------------|
| 224586_x_at | -0.27046693 | -3.66512751 | 0.000534046 | 0.003027344 |
| 224587_at   | -0.64751188 | -5.6123718  | 5.74E-07    | 1.01E-05    |
| 224588_at   | 0.065223488 | 0.189024941 | 0.850726801 | 0.918122108 |
| 224589_at   | -0.23385534 | -1.20566421 | 0.232795539 | 0.401377193 |
| 224590_at   | -0.08377674 | -0.34517773 | 0.73119742  | 0.843211846 |
| 224591_at   | 0.165957974 | 3.166848796 | 0.002447342 | 0.010798363 |
| 224592_x_at | 0.172660267 | 3.264610827 | 0.001833167 | 0.008482906 |
| 224593_at   | 0.278806521 | 4.905438149 | 7.77E-06    | 8.67E-05    |
| 224594_x_at | -0.10844185 | -2.25057446 | 0.028181766 | 0.080981128 |
| 224595_at   | 0.751674875 | 5.105549637 | 3.76E-06    | 4.77E-05    |
| 224596_at   | 0.556946532 | 5.445918671 | 1.07E-06    | 1.68E-05    |
| 224597_at   | 0.023551147 | 0.648087818 | 0.519460991 | 0.688710748 |
| 224598_at   | -0.02908386 | -0.41469028 | 0.679883748 | 0.808135114 |
| 224599_at   | 0.086741513 | 1.517355525 | 0.134556671 | 0.272047354 |
| 224600_at   | -0.18201462 | -2.99515774 | 0.004015545 | 0.016446366 |
| 224601_at   | -0.08101629 | -1.45642271 | 0.150616275 | 0.29510489  |
| 224602_at   | -0.14339537 | -1.4137486  | 0.162729403 | 0.312186749 |
| 224603_at   | -0.25900046 | -4.64119103 | 2.00E-05    | 0.000190829 |
| 224604_at   | 0.043181993 | 0.731498987 | 0.467391299 | 0.644612003 |
| 224605_at   | -0.15651343 | -2.64677843 | 0.010421348 | 0.036048832 |
| 224606_at   | 0.564515958 | 4.576836427 | 2.51E-05    | 0.000231267 |
| 224607_s_at | -0.07450817 | -1.52070695 | 0.133714335 | 0.270742024 |
| 224608_s_at | -0.02483263 | -0.70709478 | 0.482311688 | 0.657419604 |
| 224609_at   | 0.27757148  | 4.975981423 | 6.02E-06    | 7.02E-05    |
| 224610_at   | 0.133623674 | 2.406390698 | 0.019285471 | 0.059862916 |
| 224611_s_at | -0.37130232 | -4.47171649 | 3.62E-05    | 0.000314836 |
| 224612_s_at | -0.37431819 | -5.06360114 | 4.38E-06    | 5.41E-05    |
| 224613_s_at | -0.27508246 | -5.20471727 | 2.61E-06    | 3.53E-05    |
| 224614_at   | 0.332671472 | 4.423284466 | 4.28E-05    | 0.000361983 |
| 224615_x_at | 0.006231237 | 0.13105345  | 0.89618217  | 0.944314933 |
| 224616_at   | 0.406134531 | 5.569858588 | 6.73E-07    | 1.15E-05    |
| 224617_at   | 2.86E-05    | 0.00056361  | 0.99955222  | 0.999775923 |
| 224618_at   | -0.09167812 | -2.57260762 | 0.012649242 | 0.042259048 |
| 224619_at   | 0.256890585 | 4.541779292 | 2.83E-05    | 0.000255638 |
| 224620_at   | -0.02902514 | -1.05283015 | 0.296743323 | 0.475806764 |
| 224621_at   | -0.49038427 | -5.86960809 | 2.17E-07    | 4.61E-06    |
| 224622_at   | 0.082872713 | 2.474082491 | 0.016276003 | 0.05201866  |
| 224623_at   | -0.38041558 | -3.86589909 | 0.000279938 | 0.001755683 |
| 224624_at   | 0.293104231 | 5.324359131 | 1.68E-06    | 2.46E-05    |
| 224625_x_at | 0.276585896 | 4.629160234 | 2.08E-05    | 0.000197998 |
| 224626_at   | 0.128787975 | 3.77406073  | 0.000376976 | 0.002254795 |
| 224627_at   | -0.01544521 | -0.46183596 | 0.645909923 | 0.785154933 |
| 224628_at   | -0.15037106 | -1.93370687 | 0.057986685 | 0.143171146 |
| 224629_at   | 0.260617596 | 5.773054978 | 3.13E-07    | 6.18E-06    |
| 224630_at   | -0.26264186 | -3.64415885 | 0.000570734 | 0.003204427 |
| 224631_at   | 0.244045518 | 4.201228068 | 9.18E-05    | 0.00068525  |
| 224632_at   | -0.28223666 | -4.95909871 | 6.40E-06    | 7.39E-05    |
| 224633_s_at | -0.02968168 | -0.8525531  | 0.397380297 | 0.57973886  |
| 224634_at   | -0.32447819 | -4.6211015  | 2.14E-05    | 0.000202658 |
| 224635_s_at | 0.072858089 | 0.996251359 | 0.323226495 | 0.505213753 |
| 224636_at   | 0.154554412 | 2.645624907 | 0.010453065 | 0.036138965 |
| 224637_at   | 0.075746701 | 1.320693556 | 0.191741197 | 0.351099994 |
| 224638_at   | 0.046696261 | 1.1098895   | 0.27158306  | 0.44748933  |
| 224639_at   | 0.213044978 | 4.06157601  | 0.000146779 | 0.001016398 |
| 224640_at   | -0.08716893 | -1.68268967 | 0.097759677 | 0.213803548 |
| 224641_at   | -0.10714318 | -1.29329104 | 0.20098846  | 0.363108427 |
| 224642_at   | -0.10127067 | -1.48629952 | 0.142563697 | 0.283654918 |
| 224643_at   | 0.134239746 | 2.024537002 | 0.047482784 | 0.122473629 |
| 224644_at   | 0.144631577 | 2.493047183 | 0.015512392 | 0.050006577 |
| 224645_at   | 0.241004035 | 4.43838762  | 4.07E-05    | 0.000346716 |
| 224646_x_at | 0.034938491 | 0.883483761 | 0.380587285 | 0.56338667  |
| 224647_at   | -0.45725732 | -5.82312362 | 2.59E-07    | 5.32E-06    |
| 224648_at   | 0.052657279 | 1.139983644 | 0.258933893 | 0.432948241 |
| 224649_x_at | -0.59111104 | -6.06167357 | 1.05E-07    | 2.61E-06    |
| 224650_at   | -1.40662183 | -7.02399007 | 2.55E-09    | 1.72E-07    |
| 224651_at   | -0.24410108 | -3.21685469 | 0.00211239  | 0.009545311 |
| 224652_at   | -0.18116643 | -3.362484   | 0.001365956 | 0.006619028 |
| 224653_at   | 0.350703862 | 6.50397744  | 1.91E-08    | 7.15E-07    |
| 224654_at   | 0.089998157 | 1.358376041 | 0.179553978 | 0.335421601 |
| 224655_at   | 0.309814411 | 3.635953312 | 0.000585736 | 0.003273441 |
| 224656_s_at | -0.37893571 | -5.03777126 | 4.81E-06    | 5.84E-05    |
| 224657_at   | 0.004702232 | 0.078247936 | 0.937897563 | 0.96750215  |
| 224658_x_at | -0.17120637 | -4.08090523 | 0.000137597 | 0.000964476 |
| 224659_at   | 0.175331063 | 4.070272651 | 0.000142577 | 0.000992995 |
| 224660_at   | -0.07130678 | -0.83949744 | 0.40460406  | 0.586981908 |



|             |             |             |             |             |
|-------------|-------------|-------------|-------------|-------------|
| 224661_at   | -0.02224626 | -0.41058996 | 0.682871557 | 0.81042955  |
| 224662_at   | 0.351299344 | 5.388424088 | 1.32E-06    | 2.01E-05    |
| 224663_s_at | 0.1430069   | 1.296509233 | 0.199885453 | 0.361631743 |
| 224664_at   | 0.231369654 | 3.291900373 | 0.001689621 | 0.007912279 |
| 224665_at   | 0.03269009  | 0.523123187 | 0.602862201 | 0.753780144 |
| 224666_at   | 0.1667185   | 4.023144678 | 0.000166822 | 0.001129469 |
| 224667_x_at | 0.213497112 | 4.844222107 | 9.69E-06    | 0.000104076 |
| 224668_at   | 0.048151053 | 1.493608869 | 0.140646176 | 0.280934266 |
| 224669_at   | 0.084670343 | 2.01805636  | 0.048173747 | 0.123868602 |
| 224670_at   | 0.064795696 | 1.9763587   | 0.052829982 | 0.133108442 |
| 224671_at   | -0.08362704 | -2.27589807 | 0.026525439 | 0.077249231 |
| 224672_x_at | -0.01205922 | -0.43982898 | 0.661679817 | 0.795737281 |
| 224673_at   | 0.170653716 | 2.798111847 | 0.006946706 | 0.025886949 |
| 224674_at   | -0.26568575 | -6.59176736 | 1.36E-08    | 5.63E-07    |
| 224675_at   | 0.208339376 | 3.120087441 | 0.002805107 | 0.012143145 |
| 224676_at   | 0.05678503  | 0.87908168  | 0.382949626 | 0.565618294 |
| 224677_x_at | -0.30048791 | -4.47552364 | 3.57E-05    | 0.000311545 |
| 224678_at   | -0.0501006  | -1.93893731 | 0.057332062 | 0.14195482  |
| 224679_at   | -0.09139286 | -2.27695277 | 0.026458365 | 0.077105369 |
| 224680_at   | 0.06684898  | 1.596679086 | 0.115719528 | 0.24297228  |
| 224681_at   | 0.233342038 | 4.032066143 | 0.000161946 | 0.001102973 |
| 224682_at   | 0.155704914 | 3.343609601 | 0.001446234 | 0.006953746 |
| 224683_at   | -0.01558422 | -0.49885233 | 0.619752002 | 0.766667001 |
| 224684_at   | 0.010398775 | 0.247540512 | 0.805355727 | 0.890429919 |
| 224685_at   | 0.367988666 | 5.217484094 | 2.49E-06    | 3.39E-05    |
| 224686_x_at | 0.332847263 | 5.424572384 | 1.16E-06    | 1.80E-05    |
| 224687_at   | 0.327884645 | 4.437452267 | 4.08E-05    | 0.000347314 |
| 224688_at   | 0.045893602 | 0.943422288 | 0.349340643 | 0.532377092 |
| 224689_at   | -0.02520391 | -0.56500614 | 0.574227571 | 0.732050674 |
| 224690_at   | -0.09009522 | -1.54761977 | 0.127101009 | 0.260846453 |
| 224691_at   | 0.078448565 | 1.094481644 | 0.278224723 | 0.455003262 |
| 224692_at   | 0.030226603 | 0.509360023 | 0.612413811 | 0.760932971 |
| 224693_at   | -0.10335504 | -2.2316624  | 0.029477719 | 0.083928024 |
| 224694_at   | 0.553834723 | 4.716256373 | 1.53E-05    | 0.000152631 |
| 224695_at   | 0.202923504 | 4.736120335 | 1.43E-05    | 0.00014359  |
| 224696_s_at | 0.142983363 | 3.856233078 | 0.000288894 | 0.001803499 |
| 224697_at   | 0.081127507 | 2.506530902 | 0.014989301 | 0.048564726 |
| 224698_at   | -0.17019226 | -2.6008327  | 0.011754876 | 0.039780887 |
| 224699_s_at | -0.08116588 | -1.24798945 | 0.217001505 | 0.383149657 |
| 224700_at   | -0.08435716 | -1.37337753 | 0.174869949 | 0.329064748 |
| 224701_at   | 0.297358636 | 4.326887548 | 5.98E-05    | 0.000477488 |
| 224702_at   | 0.075412857 | 1.447334696 | 0.15313504  | 0.298668733 |
| 224703_at   | 0.233930943 | 4.294769433 | 6.67E-05    | 0.000523878 |
| 224704_at   | 0.234869148 | 5.410815637 | 1.22E-06    | 1.87E-05    |
| 224705_s_at | 0.265969962 | 3.060386715 | 0.003333195 | 0.01404026  |
| 224706_at   | 0.094313864 | 2.199394979 | 0.031810512 | 0.089267576 |
| 224707_at   | 0.184638961 | 3.317349019 | 0.001565371 | 0.007424341 |
| 224708_at   | 0.228437486 | 6.528318906 | 1.74E-08    | 6.67E-07    |
| 224709_s_at | 0.155678432 | 1.995229942 | 0.050676919 | 0.128845879 |
| 224710_at   | 0.39401312  | 5.575662497 | 6.58E-07    | 1.13E-05    |
| 224711_at   | -0.03448191 | -0.62463177 | 0.534638732 | 0.701218088 |
| 224712_x_at | 0.060780275 | 2.046733812 | 0.04518056  | 0.117854993 |
| 224713_at   | -0.13996358 | -3.14809099 | 0.002585382 | 0.01131915  |
| 224714_at   | -0.18825953 | -2.91230148 | 0.005069971 | 0.019937274 |
| 224715_at   | 0.131720179 | 3.15183974  | 0.002557224 | 0.011213496 |
| 224716_at   | 0.148606703 | 2.910519586 | 0.00509524  | 0.020015512 |
| 224717_s_at | 0.050432077 | 0.691429173 | 0.492027715 | 0.665991357 |
| 224718_at   | 0.01584875  | 0.322157972 | 0.74848018  | 0.854930684 |
| 224719_s_at | -0.05928134 | -0.78333411 | 0.436587294 | 0.617135065 |
| 224720_at   | 0.050200263 | 0.689201045 | 0.49341833  | 0.667065521 |
| 224721_at   | 0.13218536  | 3.359597139 | 0.001377955 | 0.006667775 |
| 224722_at   | 0.100624582 | 3.194372096 | 0.002257268 | 0.010098281 |
| 224723_x_at | -0.0674343  | -1.94403365 | 0.056700296 | 0.140745269 |
| 224724_at   | 0.005257715 | 0.10491053  | 0.916805278 | 0.955822194 |
| 224725_at   | 0.04577023  | 0.701369417 | 0.485850182 | 0.660671099 |
| 224726_at   | 0.200027279 | 3.191658    | 0.002275376 | 0.010157123 |
| 224727_at   | 0.019312732 | 0.566220932 | 0.573406982 | 0.731397478 |
| 224728_at   | -0.43138301 | -4.87025685 | 8.82E-06    | 9.62E-05    |
| 224729_s_at | 0.000310215 | 0.006073281 | 0.995174893 | 0.997746342 |
| 224730_at   | 0.105608434 | 2.094587933 | 0.040543483 | 0.108016055 |
| 224731_at   | 0.006478663 | 0.091070216 | 0.92774757  | 0.962239368 |
| 224732_at   | -0.03759591 | -1.02867292 | 0.307863145 | 0.488237454 |
| 224733_at   | 0.283325878 | 5.118925872 | 3.58E-06    | 4.58E-05    |
| 224734_at   | 0.18607432  | 2.896131497 | 0.005303603 | 0.020691715 |
| 224735_at   | 0.141508166 | 3.637716313 | 0.000582481 | 0.003260552 |

|             |             |             |             |             |
|-------------|-------------|-------------|-------------|-------------|
| 224736_at   | 0.320203792 | 4.335127246 | 5.81E-05    | 0.000466798 |
| 224737_x_at | 0.114587141 | 2.734946981 | 0.008241758 | 0.029817909 |
| 224738_x_at | -0.08616799 | -1.78470137 | 0.079489178 | 0.18274333  |
| 224739_at   | 0.110529002 | 1.606273264 | 0.11359278  | 0.239545534 |
| 224740_at   | 0.015979564 | 0.204380991 | 0.838764379 | 0.910961303 |
| 224741_x_at | -0.00621656 | -0.10856355 | 0.913919771 | 0.954246988 |
| 224742_at   | -0.12188716 | -3.06355982 | 0.003302937 | 0.013932502 |
| 224743_at   | -0.12501191 | -2.23742203 | 0.029077579 | 0.083074548 |
| 224744_at   | -0.21764119 | -2.38609335 | 0.020280401 | 0.062294233 |
| 224745_x_at | -0.08821665 | -3.34157011 | 0.00145517  | 0.006987694 |
| 224746_at   | -0.06588671 | -2.320013   | 0.023845187 | 0.071036468 |
| 224747_at   | 0.329562831 | 4.172175871 | 0.000101232 | 0.000744736 |
| 224748_at   | 0.087292363 | 2.773920063 | 0.007418795 | 0.02731291  |
| 224749_at   | 0.211661257 | 4.826231228 | 1.03E-05    | 0.00010976  |
| 224750_at   | 0.083270735 | 3.439481019 | 0.00108011  | 0.005429714 |
| 224751_at   | -0.02597947 | -0.2791104  | 0.781143359 | 0.874958872 |
| 224752_at   | 0.110799652 | 1.8334175   | 0.071823792 | 0.168971358 |
| 224753_at   | -0.01591955 | -0.48645641 | 0.628459044 | 0.772769812 |
| 224754_at   | 0.321445113 | 7.851291877 | 1.02E-10    | 2.14E-08    |
| 224755_at   | 0.082740463 | 1.266446642 | 0.210367124 | 0.375123789 |
| 224756_s_at | -0.15863508 | -3.1631054  | 0.002474325 | 0.010899128 |
| 224758_at   | 0.079223257 | 1.646992818 | 0.104915457 | 0.225785216 |
| 224759_s_at | -0.12007151 | -1.8709415  | 0.066351664 | 0.159138595 |
| 224760_at   | 0.32056433  | 6.502091217 | 1.93E-08    | 7.19E-07    |
| 224761_at   | 0.612124784 | 6.740472778 | 7.66E-09    | 3.69E-07    |
| 224762_at   | -0.06208392 | -1.7886008  | 0.078851452 | 0.181548045 |
| 224763_at   | -0.21496876 | -2.79890348 | 0.006931736 | 0.025837626 |
| 224764_at   | 0.370635914 | 3.920786645 | 0.000233929 | 0.001507971 |
| 224765_at   | 0.045125663 | 0.793459013 | 0.430713438 | 0.611530375 |
| 224766_at   | 0.105850414 | 1.613130856 | 0.11209209  | 0.237186671 |
| 224767_at   | -0.04410488 | -1.08682478 | 0.281567115 | 0.458807701 |
| 224768_at   | 0.141346207 | 2.31148149  | 0.024343919 | 0.072202691 |
| 224769_at   | 0.097012735 | 1.847419838 | 0.06973901  | 0.165267291 |
| 224770_s_at | 0.177147    | 4.54568293  | 2.80E-05    | 0.000252879 |
| 224771_at   | 0.422723565 | 4.995917349 | 5.60E-06    | 6.61E-05    |
| 224772_at   | 0.281081267 | 4.375779859 | 5.05E-05    | 0.000415017 |
| 224773_at   | 0.092217828 | 2.279555856 | 0.026293464 | 0.076749233 |
| 224774_s_at | 0.159092674 | 3.842595315 | 0.000301999 | 0.001874055 |
| 224775_at   | 0.023345959 | 0.746107254 | 0.45858705  | 0.637228257 |
| 224776_at   | 0.17866831  | 4.112515206 | 0.000123766 | 0.000883318 |
| 224777_s_at | 0.101603156 | 1.76131162  | 0.083405286 | 0.189465744 |
| 224778_s_at | 0.132187378 | 2.489277268 | 0.015661561 | 0.050394056 |
| 224779_s_at | -0.10264845 | -1.81443089 | 0.074734099 | 0.174167824 |
| 224780_at   | 0.453165721 | 6.781698696 | 6.53E-09    | 3.34E-07    |
| 224781_s_at | 0.347350995 | 5.199248397 | 2.67E-06    | 3.58E-05    |
| 224782_at   | -0.45332754 | -5.177569   | 2.89E-06    | 3.82E-05    |
| 224783_at   | 0.244804087 | 5.370354897 | 1.42E-06    | 2.13E-05    |
| 224784_at   | 0.135877512 | 3.14261212  | 0.002627059 | 0.011476882 |
| 224785_at   | 0.056353745 | 1.359992312 | 0.179044765 | 0.334792211 |
| 224786_at   | -0.31149424 | -3.60201188 | 0.000651885 | 0.003578681 |
| 224787_s_at | -0.29841734 | -2.77712553 | 0.007354589 | 0.027121982 |
| 224788_at   | 0.097910521 | 1.597742386 | 0.115482255 | 0.24261425  |
| 224789_at   | 0.372639518 | 6.327829574 | 3.77E-08    | 1.18E-06    |
| 224790_at   | -0.0577166  | -1.24168347 | 0.219303201 | 0.386108176 |
| 224791_at   | 0.023048764 | 0.41656462  | 0.678519673 | 0.807358925 |
| 224792_at   | 0.071931895 | 1.876179372 | 0.065616583 | 0.157766594 |
| 224793_s_at | 0.357611514 | 3.009895958 | 0.003850864 | 0.015885435 |
| 224794_s_at | 0.211288395 | 1.552658243 | 0.125892404 | 0.259089303 |
| 224795_x_at | 0.034593083 | 0.750169173 | 0.456156025 | 0.635094238 |
| 224796_at   | 0.197726158 | 4.077453524 | 0.000139195 | 0.000973082 |
| 224797_at   | 0.613677041 | 3.803344729 | 0.00034298  | 0.00208041  |
| 224798_s_at | -0.05207756 | -0.87104456 | 0.387286391 | 0.569943146 |
| 224799_at   | -0.17050705 | -2.57794377 | 0.01247556  | 0.041774011 |
| 224800_at   | 0.126991565 | 2.713252683 | 0.008735375 | 0.03124961  |
| 224801_at   | -0.63652648 | -5.30580264 | 1.80E-06    | 2.60E-05    |
| 224802_at   | -0.46388422 | -5.43007495 | 1.13E-06    | 1.77E-05    |
| 224803_s_at | 0.027349282 | 0.924471615 | 0.359034319 | 0.54216657  |
| 224804_s_at | 0.167357609 | 5.365299937 | 1.44E-06    | 2.16E-05    |
| 224805_s_at | -0.04955241 | -1.75562095 | 0.084381941 | 0.191291083 |
| 224806_at   | 0.107134634 | 2.442487507 | 0.017623665 | 0.055580895 |
| 224807_at   | 0.054704463 | 2.167770261 | 0.034252837 | 0.094659151 |
| 224808_s_at | -0.00108575 | -0.03561474 | 0.971710668 | 0.985727566 |
| 224809_x_at | 0.104182245 | 2.958861597 | 0.004449476 | 0.017923027 |
| 224810_s_at | 0.004518658 | 0.070145809 | 0.944316577 | 0.971270943 |
| 224811_at   | 0.547530738 | 5.955516072 | 1.57E-07    | 3.57E-06    |

|             |             |             |             |             |
|-------------|-------------|-------------|-------------|-------------|
| 224812_at   | 0.051061536 | 0.810705671 | 0.420816971 | 0.602790062 |
| 224813_at   | -0.2608822  | -3.7961174  | 0.000351086 | 0.002121517 |
| 224814_at   | 0.05737153  | 1.272755796 | 0.208134193 | 0.372181545 |
| 224815_at   | -0.01547801 | -0.38169143 | 0.704071632 | 0.825536486 |
| 224816_at   | -0.01028829 | -0.32665968 | 0.745089856 | 0.852326802 |
| 224817_at   | 0.308599436 | 4.301081132 | 6.53E-05    | 0.000514052 |
| 224818_at   | 0.209411277 | 3.254006317 | 0.001891989 | 0.008704629 |
| 224819_at   | -0.17131012 | -1.96177437 | 0.054547226 | 0.136611074 |
| 224820_at   | 0.068178012 | 1.230698313 | 0.223355659 | 0.390494509 |
| 224821_at   | 0.178871327 | 3.755393613 | 0.000400309 | 0.002373074 |
| 224822_at   | -0.46426366 | -7.65828846 | 2.17E-10    | 3.40E-08    |
| 224823_at   | 0.573702146 | 5.93788186  | 1.68E-07    | 3.77E-06    |
| 224824_at   | -0.09037549 | -1.60016444 | 0.114943243 | 0.24172047  |
| 224825_at   | 0.011703747 | 0.41467443  | 0.679895289 | 0.808135114 |
| 224826_at   | -0.07994684 | -0.76522231 | 0.447211944 | 0.626929328 |
| 224827_at   | -0.18508793 | -2.7224868  | 0.008522046 | 0.030643436 |
| 224828_at   | -0.15506686 | -1.62290647 | 0.109980602 | 0.233903735 |
| 224829_at   | -0.00286703 | -0.02945684 | 0.976600394 | 0.98827608  |
| 224830_at   | -0.19563575 | -2.25712984 | 0.027744456 | 0.079919769 |
| 224831_at   | 0.121183159 | 1.896383394 | 0.062845352 | 0.152514996 |
| 224832_at   | 0.213310775 | 3.999159223 | 0.000180644 | 0.001210031 |
| 224833_at   | 0.468815902 | 5.761132498 | 3.28E-07    | 6.43E-06    |
| 224834_at   | -0.23485695 | -3.74598366 | 0.000412589 | 0.002435212 |
| 224835_at   | -0.13179087 | -1.65588862 | 0.103093453 | 0.222719809 |
| 224836_at   | 0.344335743 | 3.173332297 | 0.00240126  | 0.0106181   |
| 224837_at   | -0.33291377 | -4.9151664  | 7.51E-06    | 8.43E-05    |
| 224838_at   | -0.46382381 | -6.45009532 | 2.35E-08    | 8.30E-07    |
| 224839_s_at | 0.104779507 | 2.224757919 | 0.029963792 | 0.08504497  |
| 224840_at   | 0.73805359  | 4.028047099 | 0.000164126 | 0.001114928 |
| 224841_x_at | -0.03988471 | -0.64673325 | 0.52033125  | 0.689382818 |
| 224842_at   | -0.02599246 | -0.40569847 | 0.686442556 | 0.812761371 |
| 224843_at   | 0.063608051 | 2.071341397 | 0.042741722 | 0.112691642 |
| 224844_at   | 0.285935863 | 5.048883341 | 4.62E-06    | 5.66E-05    |
| 224845_s_at | -0.03809325 | -1.13911861 | 0.259291543 | 0.433366211 |
| 224846_at   | 0.09742511  | 3.068105563 | 0.003260036 | 0.013778848 |
| 224847_at   | -0.08650529 | -1.60651533 | 0.113539532 | 0.239444543 |
| 224848_at   | -0.05645441 | -1.26422203 | 0.211158683 | 0.376040247 |
| 224849_at   | 0.1309062   | 4.090550515 | 0.000133226 | 0.000938989 |
| 224850_at   | -0.26851995 | -4.16351558 | 0.000104238 | 0.000763077 |
| 224851_at   | -0.06013322 | -0.71383711 | 0.478163157 | 0.653768669 |
| 224852_at   | 0.074747075 | 1.908753899 | 0.061198065 | 0.149334639 |
| 224853_at   | -0.07645299 | -2.31301448 | 0.024253626 | 0.071998876 |
| 224854_s_at | -0.12647842 | -4.29530493 | 6.66E-05    | 0.000523032 |
| 224855_at   | 0.149950186 | 3.127777919 | 0.002743083 | 0.011912727 |
| 224856_at   | 0.453058575 | 3.394579151 | 0.001239042 | 0.006101285 |
| 224857_s_at | -0.08132951 | -1.97415419 | 0.053086544 | 0.133649381 |
| 224858_at   | -0.04319146 | -1.78582666 | 0.079304705 | 0.182360374 |
| 224859_at   | -0.01892145 | -0.60215127 | 0.549397698 | 0.7125684   |
| 224860_at   | -0.09808114 | -2.71416406 | 0.008714104 | 0.031188495 |
| 224861_at   | -0.10625425 | -2.0769798  | 0.042199256 | 0.111602412 |
| 224862_at   | -0.17660925 | -2.53517605 | 0.013930573 | 0.045690972 |
| 224863_at   | -0.10131395 | -1.595771   | 0.115922477 | 0.243285106 |
| 224864_at   | 0.055197901 | 2.077341875 | 0.042164626 | 0.111530627 |
| 224865_at   | 0.127775047 | 1.977596249 | 0.052686422 | 0.132859086 |
| 224866_at   | 0.275686141 | 2.257454382 | 0.027722962 | 0.079878448 |
| 224867_at   | -0.18835069 | -3.29975081 | 0.001650333 | 0.007767949 |
| 224868_at   | -0.11393897 | -2.63849999 | 0.010650929 | 0.036681151 |
| 224869_s_at | -0.10068656 | -3.33549908 | 0.001482082 | 0.007095578 |
| 224870_at   | -0.07737329 | -1.53216164 | 0.130866906 | 0.266540753 |
| 224871_at   | -0.36205741 | -4.51589985 | 3.10E-05    | 0.00027598  |
| 224872_at   | 0.399210551 | 4.369978335 | 5.15E-05    | 0.000422552 |
| 224873_s_at | -0.11021465 | -2.20681917 | 0.031259847 | 0.087987473 |
| 224874_at   | -0.24797078 | -4.50183048 | 3.26E-05    | 0.000287315 |
| 224875_at   | -0.00090798 | -0.01255392 | 0.990026354 | 0.995326806 |
| 224876_at   | -0.19795958 | -3.42544268 | 0.001127595 | 0.005628152 |
| 224877_s_at | 0.087132283 | 2.656970513 | 0.010144905 | 0.035278251 |
| 224878_at   | -0.06657653 | -1.79117381 | 0.078432995 | 0.180798814 |
| 224879_at   | -0.20796888 | -2.92471127 | 0.004897178 | 0.019390864 |
| 224880_at   | 0.119846011 | 2.599569378 | 0.011793643 | 0.039885093 |
| 224881_at   | -0.18380418 | -3.07384129 | 0.003206648 | 0.013587893 |
| 224882_at   | 0.302896554 | 6.65617508  | 1.06E-08    | 4.67E-07    |
| 224883_at   | -0.42980105 | -5.24761414 | 2.23E-06    | 3.10E-05    |
| 224884_at   | 0.050298662 | 1.189907561 | 0.238884067 | 0.408599545 |
| 224885_s_at | 0.294171481 | 6.362113537 | 3.30E-08    | 1.07E-06    |
| 224886_at   | 0.002012988 | 0.051243369 | 0.959305971 | 0.979133132 |

|             |             |             |             |             |
|-------------|-------------|-------------|-------------|-------------|
| 224887_at   | 0.105821034 | 2.771536549 | 0.007466871 | 0.027456755 |
| 224888_at   | -0.30418676 | -4.72752853 | 1.47E-05    | 0.000147288 |
| 224889_at   | 0.148255956 | 3.568652547 | 0.000723802 | 0.003902541 |
| 224890_s_at | 0.228852565 | 3.942675357 | 0.00021769  | 0.001416363 |
| 224891_at   | 0.125214899 | 2.52549851  | 0.014280435 | 0.046599096 |
| 224892_at   | -0.32528403 | -4.72874715 | 1.46E-05    | 0.000146716 |
| 224893_at   | 0.133145455 | 2.522055882 | 0.014406798 | 0.046976151 |
| 224894_at   | 0.912665396 | 6.566184932 | 1.50E-08    | 6.05E-07    |
| 224895_at   | 0.463500104 | 4.855520072 | 9.31E-06    | 0.000100718 |
| 224896_s_at | -0.1802317  | -2.2993651  | 0.025068149 | 0.073891685 |
| 224897_at   | -0.03750846 | -0.74035121 | 0.462044721 | 0.64022145  |
| 224898_at   | -0.08943854 | -1.13577745 | 0.260676238 | 0.434966489 |
| 224899_s_at | 0.335042997 | 3.572594726 | 0.000714925 | 0.003862135 |
| 224900_at   | 0.296889984 | 4.695461134 | 1.65E-05    | 0.000162131 |
| 224901_at   | 0.032778277 | 0.50457977  | 0.615747286 | 0.763681557 |
| 224902_at   | 0.042209253 | 0.656515066 | 0.514064171 | 0.684679583 |
| 224903_at   | -0.27565981 | -5.30936774 | 1.78E-06    | 2.57E-05    |
| 224904_at   | 0.074345352 | 1.283948219 | 0.204216432 | 0.367247737 |
| 224905_at   | -0.10143784 | -2.18640573 | 0.032794487 | 0.091448881 |
| 224906_at   | 0.602288439 | 5.278275422 | 1.99E-06    | 2.83E-05    |
| 224907_s_at | -0.07893126 | -2.09786841 | 0.040241326 | 0.107384791 |
| 224908_s_at | -0.16120079 | -2.48237036 | 0.015938219 | 0.051150741 |
| 224909_s_at | 0.332411746 | 4.092426122 | 0.000132391 | 0.000934139 |
| 224910_at   | -0.10338344 | -1.85451154 | 0.068702726 | 0.163391988 |
| 224911_s_at | 0.114207033 | 1.791580673 | 0.078366996 | 0.180674635 |
| 224912_at   | 0.231437113 | 6.966208572 | 3.19E-09    | 2.01E-07    |
| 224913_s_at | -0.2868181  | -5.03466222 | 4.87E-06    | 5.89E-05    |
| 224914_s_at | 0.07039748  | 1.037439424 | 0.303795557 | 0.483610057 |
| 224915_x_at | 0.039251185 | 0.572129662 | 0.569423812 | 0.728291474 |
| 224916_at   | -0.11677858 | -2.04532874 | 0.045323377 | 0.118137896 |
| 224917_at   | 0.05580079  | 0.405123806 | 0.686862555 | 0.813064794 |
| 224918_x_at | 0.237696115 | 1.873176526 | 0.066037155 | 0.158494845 |
| 224919_at   | 0.138179146 | 1.694476192 | 0.095486679 | 0.210117709 |
| 224920_x_at | 0.013148859 | 0.359705809 | 0.720360981 | 0.836326094 |
| 224921_at   | 0.122831415 | 2.701770555 | 0.009007462 | 0.032058732 |
| 224922_at   | 0.055819609 | 1.373292292 | 0.174896298 | 0.329100474 |
| 224923_at   | 0.128277109 | 4.700453233 | 1.62E-05    | 0.000160199 |
| 224924_at   | 0.077025251 | 1.730971939 | 0.088722499 | 0.198751269 |
| 224925_at   | 0.437791144 | 7.253990565 | 1.04E-09    | 9.60E-08    |
| 224926_at   | 0.030800003 | 0.963340174 | 0.339337696 | 0.522224583 |
| 224927_at   | 0.158290345 | 2.358700806 | 0.021695871 | 0.065782352 |
| 224928_at   | 0.152678484 | 3.350295349 | 0.0014173   | 0.006834483 |
| 224929_at   | -0.12481514 | -3.12758195 | 0.002744648 | 0.011917205 |
| 224930_x_at | -0.10757274 | -2.20205427 | 0.031612295 | 0.088800546 |
| 224931_at   | -0.10445108 | -3.12975912 | 0.002727314 | 0.011854613 |
| 224932_at   | -0.3420844  | -5.70147094 | 4.10E-07    | 7.72E-06    |
| 224933_s_at | 0.231075906 | 4.331555445 | 5.88E-05    | 0.000471281 |
| 224934_at   | -0.12131371 | -1.15933307 | 0.251025381 | 0.423799726 |
| 224935_at   | -0.29147353 | -3.55029432 | 0.000766542 | 0.004092007 |
| 224936_at   | -0.08917364 | -2.02142267 | 0.047813759 | 0.123135445 |
| 224937_at   | 0.004663699 | 0.117738129 | 0.90667802  | 0.950438504 |
| 224938_at   | 0.122818396 | 2.109997671 | 0.03914108  | 0.104986985 |
| 224939_at   | 0.224848693 | 3.407791463 | 0.001190112 | 0.005892809 |
| 224940_s_at | -0.04694617 | -1.39188767 | 0.169220013 | 0.321314561 |
| 224941_at   | -0.01117227 | -0.42670701 | 0.671157233 | 0.80192918  |
| 224942_at   | -0.02401442 | -0.62742593 | 0.532818735 | 0.699718303 |
| 224943_at   | 0.377316301 | 6.446738893 | 2.38E-08    | 8.37E-07    |
| 224944_at   | 0.253840872 | 3.742466223 | 0.000417271 | 0.002458303 |
| 224945_at   | 0.395782749 | 6.512945927 | 1.85E-08    | 6.98E-07    |
| 224946_s_at | -0.05161339 | -0.68966892 | 0.493126143 | 0.666831878 |
| 224947_at   | -0.0848762  | -2.51039837 | 0.014842235 | 0.048154567 |
| 224948_at   | -0.08294926 | -1.80955436 | 0.075497335 | 0.175534641 |
| 224949_at   | -0.16745018 | -2.71159146 | 0.008774269 | 0.031353611 |
| 224950_at   | 0.052568292 | 1.697621754 | 0.094887459 | 0.209149255 |
| 224951_at   | -0.00359948 | -0.10163499 | 0.91939357  | 0.957507922 |
| 224952_at   | -0.64690133 | -7.83847827 | 1.08E-10    | 2.18E-08    |
| 224953_at   | -0.09148228 | -1.01944165 | 0.312186172 | 0.49315087  |
| 224954_at   | 0.108236804 | 3.451023953 | 0.001042493 | 0.005276141 |
| 224955_at   | 0.69755766  | 7.495662758 | 4.08E-10    | 5.09E-08    |
| 224956_at   | 0.253263231 | 3.248483693 | 0.001923322 | 0.008817921 |
| 224957_at   | -0.21958811 | -2.51473196 | 0.014678994 | 0.047711535 |
| 224958_at   | -0.01198436 | -0.37677469 | 0.707702745 | 0.827764518 |
| 224959_at   | 0.373758417 | 3.452275918 | 0.001038489 | 0.005259762 |
| 224960_at   | -0.14191638 | -2.26143293 | 0.027460669 | 0.079291394 |
| 224961_at   | -0.08756377 | -2.31641185 | 0.024054582 | 0.071510843 |

|             |             |             |             |             |
|-------------|-------------|-------------|-------------|-------------|
| 224962_at   | -0.24236929 | -5.99806867 | 1.33E-07    | 3.16E-06    |
| 224963_at   | 0.105536794 | 1.965560994 | 0.054096837 | 0.135710351 |
| 224964_s_at | -0.145943   | -1.11815456 | 0.268066601 | 0.443424107 |
| 224965_at   | -0.02321776 | -0.58978638 | 0.557602509 | 0.719597998 |
| 224966_s_at | -0.07090333 | -1.65876273 | 0.102510334 | 0.221783988 |
| 224967_at   | -0.36370481 | -3.42903245 | 0.001115268 | 0.00557846  |
| 224968_at   | -0.4170886  | -5.03868928 | 4.80E-06    | 5.83E-05    |
| 224969_at   | -0.18538058 | -4.0573621  | 0.000148857 | 0.00102782  |
| 224970_at   | 0.620276637 | 8.707671487 | 3.73E-12    | 3.63E-09    |
| 224971_at   | -0.1261029  | -1.84368858 | 0.070289509 | 0.166157767 |
| 224972_at   | 0.099911912 | 2.215948618 | 0.030594214 | 0.086446015 |
| 224973_at   | 0.117574709 | 4.095210005 | 0.000131162 | 0.000927224 |
| 224974_at   | -0.10287983 | -1.67971025 | 0.098341221 | 0.214823103 |
| 224975_at   | 0.550960869 | 7.924730942 | 7.69E-11    | 1.82E-08    |
| 224976_at   | 0.392169289 | 5.929941768 | 1.73E-07    | 3.86E-06    |
| 224977_at   | -0.03357094 | -0.46396868 | 0.644390144 | 0.784032569 |
| 224978_s_at | -0.05074753 | -1.20592897 | 0.232694207 | 0.401264402 |
| 224979_s_at | -0.02184593 | -0.52168265 | 0.603858705 | 0.754469742 |
| 224980_at   | -0.02422969 | -0.64749792 | 0.519839885 | 0.689090438 |
| 224981_at   | 0.099443224 | 2.78394215  | 0.007219748 | 0.026712887 |
| 224982_at   | 0.018378572 | 0.454090004 | 0.65144245  | 0.788683895 |
| 224983_at   | 0.132813181 | 1.623968705 | 0.109753119 | 0.23353106  |
| 224984_at   | -0.00496786 | -0.10501281 | 0.916724475 | 0.955822194 |
| 224985_at   | 0.127315805 | 2.432073403 | 0.018089377 | 0.056817093 |
| 224986_s_at | -0.53976002 | -6.56576801 | 1.51E-08    | 6.05E-07    |
| 224987_at   | -0.00468922 | -0.09016238 | 0.928465827 | 0.962658266 |
| 224988_at   | 0.014785485 | 0.442906253 | 0.659465195 | 0.794066434 |
| 224989_at   | 0.088146572 | 1.460011187 | 0.149630685 | 0.293701724 |
| 224990_at   | -0.09571993 | -1.2156614  | 0.22899153  | 0.39665476  |
| 224991_at   | -0.05271966 | -1.33311369 | 0.18765714  | 0.345703747 |
| 224992_s_at | -0.00927119 | -0.26915441 | 0.788756828 | 0.879491833 |
| 224993_at   | -0.07952203 | -1.97561055 | 0.052916932 | 0.133297459 |
| 224994_at   | 0.133519354 | 1.615912987 | 0.11148785  | 0.236310884 |
| 224995_at   | 0.283934354 | 5.180094047 | 2.86E-06    | 3.80E-05    |
| 224996_at   | 0.187889109 | 1.964269319 | 0.054250112 | 0.135988896 |
| 224997_x_at | -0.02855491 | -0.52483199 | 0.601681107 | 0.752914239 |
| 224998_at   | 0.017290895 | 0.395899801 | 0.69361756  | 0.818301272 |
| 224999_at   | 0.168126248 | 2.134968971 | 0.036958168 | 0.100458245 |
| 225000_at   | 0.410019194 | 8.53815945  | 7.17E-12    | 4.78E-09    |
| 225001_at   | -0.07212594 | -1.77183057 | 0.081624709 | 0.186539758 |
| 225002_s_at | 0.064794854 | 1.503823584 | 0.138000614 | 0.277067541 |
| 225003_at   | -0.13622937 | -2.38791789 | 0.020189123 | 0.062064403 |
| 225004_at   | 0.064282724 | 1.822067232 | 0.073551916 | 0.172049734 |
| 225005_at   | 0.095743741 | 2.537373026 | 0.013852237 | 0.04551755  |
| 225006_x_at | 0.165168548 | 4.790907686 | 1.17E-05    | 0.000121731 |
| 225007_at   | 0.287060583 | 6.499443098 | 1.95E-08    | 7.24E-07    |
| 225008_at   | 0.253313746 | 3.307524442 | 0.00161228  | 0.007612086 |
| 225009_at   | 0.181364562 | 3.160919457 | 0.002490211 | 0.010957222 |
| 225010_at   | -0.36123567 | -3.69016509 | 0.000493188 | 0.002831285 |
| 225011_at   | 0.433535468 | 6.143792869 | 7.64E-08    | 2.05E-06    |
| 225012_at   | -0.01158996 | -0.32601021 | 0.745578671 | 0.852798658 |
| 225013_at   | 0.016715496 | 0.509849959 | 0.61207262  | 0.760699375 |
| 225014_at   | 0.063807184 | 1.072541266 | 0.287876642 | 0.466062484 |
| 225015_s_at | -0.01124872 | -0.42816054 | 0.67010473  | 0.801378625 |
| 225016_at   | 0.28915658  | 3.653886196 | 0.000553425 | 0.003120178 |
| 225017_at   | 0.184061246 | 4.06594143  | 0.000144655 | 0.001003713 |
| 225018_at   | 0.044947986 | 0.68185508  | 0.498018336 | 0.671071712 |
| 225019_at   | 0.184189312 | 2.448900505 | 0.017342271 | 0.054853733 |
| 225020_at   | -0.42100176 | -7.5054947  | 3.92E-10    | 4.95E-08    |
| 225021_at   | 0.09155626  | 1.43945587  | 0.155345166 | 0.301750963 |
| 225022_at   | 0.094270054 | 1.818470692 | 0.074106728 | 0.173030558 |
| 225023_at   | 0.028618929 | 0.582054524 | 0.562763946 | 0.723623307 |
| 225024_at   | 0.155126663 | 3.586083741 | 0.000685329 | 0.003729754 |
| 225025_at   | -0.18346493 | -2.24322979 | 0.028678958 | 0.082151004 |
| 225026_at   | 0.165674197 | 2.838629856 | 0.006217582 | 0.023602834 |
| 225028_at   | -0.38984455 | -7.45839487 | 4.71E-10    | 5.65E-08    |
| 225029_at   | -0.14267326 | -2.96249249 | 0.004404182 | 0.017767801 |
| 225030_at   | 0.066874706 | 1.395999732 | 0.167984144 | 0.319728604 |
| 225031_at   | 0.059257295 | 2.192015831 | 0.032366272 | 0.090514574 |
| 225032_at   | 0.181154112 | 3.14674616  | 0.002595554 | 0.011358122 |
| 225033_at   | 0.282682131 | 4.900196453 | 7.92E-06    | 8.80E-05    |
| 225034_at   | 0.072624127 | 2.522035541 | 0.014407547 | 0.046976151 |
| 225035_x_at | 0.248888014 | 4.882862927 | 8.43E-06    | 9.27E-05    |
| 225036_at   | -0.19580856 | -2.91174705 | 0.005077821 | 0.019960667 |
| 225037_at   | 0.121205529 | 2.745093462 | 0.008019793 | 0.029161221 |

|             |             |             |             |             |
|-------------|-------------|-------------|-------------|-------------|
| 225038_s_at | 0.080731502 | 2.236391751 | 0.029148801 | 0.083219512 |
| 225039_at   | -0.12683354 | -3.35588984 | 0.001393511 | 0.006734299 |
| 225040_s_at | -0.04798356 | -0.92918215 | 0.356608723 | 0.539759456 |
| 225041_at   | 0.328445946 | 4.25011429  | 7.77E-05    | 0.000596594 |
| 225042_s_at | -0.15182462 | -4.68785666 | 1.69E-05    | 0.000165655 |
| 225043_at   | 0.145043346 | 3.194807292 | 0.002254377 | 0.010090398 |
| 225044_at   | -0.42592861 | -6.00884275 | 1.28E-07    | 3.06E-06    |
| 225045_at   | 0.181282525 | 2.010918975 | 0.048944742 | 0.125373359 |
| 225046_at   | 0.098473605 | 0.620432597 | 0.537379927 | 0.703411642 |
| 225047_at   | 0.050322965 | 1.40738217  | 0.164599433 | 0.31493612  |
| 225048_at   | 0.247683533 | 4.429522284 | 4.19E-05    | 0.000355784 |
| 225049_at   | -0.14354142 | -1.84005702 | 0.070828806 | 0.167105579 |
| 225050_at   | 0.003670015 | 0.074805241 | 0.940624602 | 0.969050845 |
| 225051_at   | -0.37443802 | -6.82657804 | 5.49E-09    | 2.95E-07    |
| 225052_at   | -0.13463535 | -2.34418244 | 0.022481301 | 0.067681663 |
| 225053_at   | -0.16262115 | -2.48263302 | 0.015927618 | 0.051126703 |
| 225054_x_at | -0.01405535 | -0.4768104  | 0.635271471 | 0.777574215 |
| 225055_at   | 0.3344659   | 5.297875522 | 1.85E-06    | 2.66E-05    |
| 225056_at   | 0.346933172 | 4.095127075 | 0.000131199 | 0.000927335 |
| 225057_at   | 0.089145664 | 1.426272318 | 0.159098798 | 0.307080263 |
| 225058_at   | 0.070974742 | 1.938792507 | 0.0573501   | 0.14198375  |
| 225059_at   | 0.349670056 | 4.855045311 | 9.32E-06    | 0.000100866 |
| 225060_at   | -0.35234196 | -4.54181038 | 2.83E-05    | 0.000255638 |
| 225061_at   | -0.39510778 | -4.2046254  | 9.07E-05    | 0.000678876 |
| 225062_at   | 0.041861403 | 0.521128478 | 0.604242258 | 0.754718179 |
| 225063_at   | -0.12677702 | -3.43842269 | 0.001083623 | 0.005441491 |
| 225064_at   | -0.1038073  | -1.41437686 | 0.162545756 | 0.311914767 |
| 225065_x_at | -0.26820634 | -5.21045894 | 2.56E-06    | 3.47E-05    |
| 225066_at   | -0.21407678 | -3.77227057 | 0.000379156 | 0.00226571  |
| 225067_at   | -0.19320344 | -4.22914233 | 8.35E-05    | 0.000632483 |
| 225068_at   | -0.01236849 | -0.21698449 | 0.828974547 | 0.905101763 |
| 225069_at   | 0.332633306 | 7.423457688 | 5.40E-10    | 6.08E-08    |
| 225070_at   | -0.24953801 | -4.67858281 | 1.75E-05    | 0.000170448 |
| 225071_at   | -0.12238907 | -2.53901386 | 0.013793992 | 0.045356171 |
| 225072_at   | 0.009045811 | 0.181837989 | 0.856337776 | 0.92138209  |
| 225073_at   | 0.059670717 | 0.904891232 | 0.369230497 | 0.552455395 |
| 225074_at   | -0.13461847 | -2.51114313 | 0.014814064 | 0.048077131 |
| 225075_at   | -0.00454309 | -0.14307952 | 0.886718514 | 0.939238898 |
| 225076_s_at | 0.197822168 | 4.711803796 | 1.56E-05    | 0.000154776 |
| 225077_at   | 0.280006001 | 5.569954121 | 6.73E-07    | 1.15E-05    |
| 225078_at   | 0.349013138 | 5.992195194 | 1.36E-07    | 3.21E-06    |
| 225079_at   | 0.103818149 | 1.841511316 | 0.070612422 | 0.166709476 |
| 225080_at   | 0.116105546 | 3.253557594 | 0.001894517 | 0.008713568 |
| 225081_s_at | 0.013375754 | 0.243226472 | 0.808679862 | 0.892449327 |
| 225082_at   | 0.068328415 | 1.450577369 | 0.15223258  | 0.297318308 |
| 225083_at   | 0.15289308  | 2.953804274 | 0.004513286 | 0.018142453 |
| 225084_at   | 0.203958133 | 3.509734842 | 0.000869643 | 0.004535133 |
| 225085_at   | 0.395825737 | 7.037156555 | 2.42E-09    | 1.66E-07    |
| 225086_at   | -0.07561481 | -0.96348053 | 0.339267884 | 0.522155789 |
| 225087_at   | 0.005850942 | 0.100235578 | 0.920499642 | 0.958253247 |
| 225088_at   | -0.1171366  | -2.65066452 | 0.010315144 | 0.035756177 |
| 225089_at   | 0.324857151 | 6.261200121 | 4.87E-08    | 1.44E-06    |
| 225090_at   | 0.154572376 | 3.755449391 | 0.000400237 | 0.002372963 |
| 225091_at   | 0.034512111 | 1.112693774 | 0.270386337 | 0.446056114 |
| 225092_at   | -0.08448071 | -1.30368687 | 0.197441725 | 0.358395904 |
| 225093_at   | -0.21129989 | -3.35485842 | 0.001397868 | 0.006754626 |
| 225094_at   | 0.002424619 | 0.079026725 | 0.937280768 | 0.967374871 |
| 225095_at   | 0.148365325 | 1.806698414 | 0.075947347 | 0.176305777 |
| 225096_at   | -0.15672292 | -2.9565634  | 0.004478369 | 0.018023166 |
| 225097_at   | 0.640374158 | 7.882292045 | 9.07E-11    | 2.00E-08    |
| 225098_at   | -0.32047968 | -4.79489843 | 1.16E-05    | 0.000120368 |
| 225099_at   | 0.131467926 | 1.644774711 | 0.105373822 | 0.226514916 |
| 225100_at   | 0.093221417 | 1.123374117 | 0.265862486 | 0.441116953 |
| 225101_s_at | 0.032356697 | 0.591041158 | 0.55676711  | 0.718896293 |
| 225102_at   | 0.070092669 | 1.097566353 | 0.276886037 | 0.453464427 |
| 225103_at   | 0.013396745 | 0.30446412  | 0.761853576 | 0.862933321 |
| 225104_at   | 0.068010651 | 2.282967468 | 0.026078725 | 0.076281849 |
| 225105_at   | -0.10316537 | -1.23822896 | 0.220571704 | 0.387522235 |
| 225106_s_at | -0.22088768 | -3.75559023 | 0.000400056 | 0.002372519 |
| 225107_at   | 0.309053039 | 3.393151095 | 0.001244443 | 0.006122485 |
| 225108_at   | 0.112683162 | 2.850772395 | 0.006013247 | 0.022942122 |
| 225109_at   | -0.02091904 | -0.57930547 | 0.564604777 | 0.725053637 |
| 225110_at   | 0.023223803 | 0.428641135 | 0.669756879 | 0.801112688 |
| 225111_s_at | -0.74593769 | -5.01390883 | 5.25E-06    | 6.26E-05    |
| 225112_at   | -0.33869982 | -5.05123459 | 4.58E-06    | 5.62E-05    |

|             |             |             |             |             |
|-------------|-------------|-------------|-------------|-------------|
| 225113_at   | 0.01580152  | 0.291359231 | 0.771806037 | 0.869271324 |
| 225114_at   | -0.03269007 | -0.53312144 | 0.595966856 | 0.748701972 |
| 225115_at   | 0.597708207 | 5.544014188 | 7.41E-07    | 1.25E-05    |
| 225116_at   | 0.585834206 | 6.543771371 | 1.64E-08    | 6.42E-07    |
| 225117_at   | 0.210233411 | 4.633152422 | 2.06E-05    | 0.0001957   |
| 225118_at   | 0.096830341 | 3.454261863 | 0.001032167 | 0.005233673 |
| 225119_at   | -0.10170897 | -1.93469517 | 0.057862507 | 0.142921854 |
| 225120_at   | -0.03285442 | -0.59553595 | 0.553779738 | 0.716214957 |
| 225121_at   | -0.01301999 | -0.30621236 | 0.760528893 | 0.862132081 |
| 225122_at   | -0.01126401 | -0.31248904 | 0.755778848 | 0.859588429 |
| 225123_at   | -0.09073029 | -1.1815878  | 0.242145022 | 0.412650655 |
| 225124_at   | -0.43165814 | -6.57138077 | 1.47E-08    | 5.96E-07    |
| 225125_at   | 0.026159786 | 0.455055899 | 0.650751479 | 0.788359525 |
| 225126_at   | 0.084078968 | 2.905082802 | 0.005173066 | 0.020267787 |
| 225127_at   | -0.30272069 | -4.52253792 | 3.03E-05    | 0.000270818 |
| 225128_at   | 0.425338089 | 5.488586346 | 9.12E-07    | 1.49E-05    |
| 225129_at   | 0.332570788 | 3.695807082 | 0.000484403 | 0.002788731 |
| 225130_at   | 0.050174314 | 1.127155446 | 0.26427372  | 0.439132998 |
| 225131_at   | 0.069099251 | 1.432255126 | 0.157386732 | 0.304657303 |
| 225132_at   | 0.117315752 | 1.680644111 | 0.098158639 | 0.214560594 |
| 225133_at   | 0.326004003 | 4.220757334 | 8.59E-05    | 0.000647692 |
| 225134_at   | -0.29204175 | -5.24164518 | 2.28E-06    | 3.15E-05    |
| 225135_at   | 0.102590025 | 2.074126828 | 0.042472987 | 0.112153781 |
| 225136_at   | -0.28472428 | -5.62124715 | 5.55E-07    | 9.85E-06    |
| 225137_at   | 0.136108974 | 2.767724349 | 0.00754436  | 0.027696117 |
| 225138_at   | 0.078260434 | 1.628355768 | 0.108817643 | 0.23204877  |
| 225139_at   | 0.286961421 | 6.0753778   | 9.92E-08    | 2.51E-06    |
| 225140_at   | -0.02145431 | -0.25114752 | 0.80257915  | 0.888733851 |
| 225141_at   | 0.06744334  | 2.235350153 | 0.029220963 | 0.083372273 |
| 225142_at   | -0.02962707 | -1.02989435 | 0.307294205 | 0.48756009  |
| 225143_at   | 0.053139068 | 0.984287995 | 0.32902285  | 0.511467688 |
| 225144_at   | -0.49190611 | -4.72543041 | 1.48E-05    | 0.000148293 |
| 225145_at   | 0.038195619 | 0.742720826 | 0.460619483 | 0.638999439 |
| 225146_at   | -0.07526689 | -1.76370026 | 0.082998146 | 0.188831879 |
| 225147_at   | -0.01146481 | -0.26685679 | 0.790516822 | 0.880719087 |
| 225148_at   | 0.171290841 | 3.976931239 | 0.000194433 | 0.001286152 |
| 225149_at   | 0.04833727  | 1.260333139 | 0.212547727 | 0.377746173 |
| 225150_s_at | 0.439502147 | 4.376719508 | 5.03E-05    | 0.000413957 |
| 225151_at   | 0.03296529  | 0.714654611 | 0.477661512 | 0.653260857 |
| 225152_at   | 0.034515297 | 0.816967075 | 0.417258201 | 0.599636757 |
| 225153_at   | 0.067629899 | 1.150422573 | 0.254645552 | 0.427891078 |
| 225154_at   | -0.06238987 | -1.38564137 | 0.171110691 | 0.323982333 |
| 225155_at   | 0.222056512 | 1.674980794 | 0.099270164 | 0.216386975 |
| 225156_at   | 0.138893581 | 4.189452341 | 9.55E-05    | 0.000708289 |
| 225157_at   | 0.063352057 | 1.299245612 | 0.198951155 | 0.360433136 |
| 225158_at   | -0.02677694 | -0.31871044 | 0.751079967 | 0.856799991 |
| 225159_s_at | 0.298732006 | 7.039199115 | 2.40E-09    | 1.66E-07    |
| 225160_x_at | 0.306220532 | 4.953441092 | 6.54E-06    | 7.53E-05    |
| 225161_at   | -0.14939743 | -2.10276411 | 0.03979404  | 0.106463647 |
| 225162_at   | 0.140879456 | 2.772061731 | 0.007456253 | 0.027426739 |
| 225163_at   | -0.06379102 | -1.24251071 | 0.219000235 | 0.385746995 |
| 225164_s_at | 0.027821538 | 0.482937661 | 0.630940418 | 0.77454236  |
| 225165_at   | -0.74820658 | -7.29362629 | 8.94E-10    | 8.75E-08    |
| 225166_at   | 0.080515    | 1.931204545 | 0.058302112 | 0.143694366 |
| 225167_at   | -0.07313789 | -1.48965154 | 0.141681792 | 0.282440906 |
| 225168_at   | -0.01422434 | -0.40968713 | 0.683530116 | 0.810838166 |
| 225169_at   | 0.131092103 | 4.416037331 | 4.39E-05    | 0.000369166 |
| 225170_at   | 0.096234192 | 1.861274268 | 0.067726636 | 0.161682083 |
| 225171_at   | 0.414962537 | 3.898537366 | 0.000251628 | 0.001602413 |
| 225172_at   | 0.055855253 | 1.685869429 | 0.097142144 | 0.212890536 |
| 225173_at   | 0.107284938 | 1.821901915 | 0.073577341 | 0.172091194 |
| 225174_at   | -0.03166893 | -0.35320266 | 0.725204687 | 0.839420058 |
| 225175_s_at | 0.442367277 | 6.853849207 | 4.94E-09    | 2.76E-07    |
| 225176_at   | 0.307068523 | 5.185443364 | 2.80E-06    | 3.73E-05    |
| 225177_at   | 0.097999332 | 3.020424915 | 0.003737093 | 0.015484717 |
| 225178_at   | 0.359773969 | 4.520601114 | 3.05E-05    | 0.000272238 |
| 225179_at   | -0.34624266 | -2.95278177 | 0.004526291 | 0.018186548 |
| 225180_at   | 0.205500793 | 2.586028154 | 0.012216551 | 0.041063636 |
| 225181_at   | 0.208455543 | 3.101508808 | 0.002960404 | 0.012699787 |
| 225182_at   | 0.067059275 | 1.313348042 | 0.194187948 | 0.354172698 |
| 225183_at   | 0.105417835 | 2.199228238 | 0.031822977 | 0.089291342 |
| 225184_at   | -0.03396154 | -1.10661855 | 0.272983632 | 0.448964512 |
| 225185_at   | 0.269421689 | 3.297612742 | 0.001660947 | 0.007801682 |
| 225186_at   | -0.08951413 | -2.49983254 | 0.015247134 | 0.049303588 |
| 225187_at   | 0.007359239 | 0.144650421 | 0.885483523 | 0.938618415 |

|             |             |             |             |             |
|-------------|-------------|-------------|-------------|-------------|
| 225188_at   | 0.341272978 | 3.984996562 | 0.000189316 | 0.001257944 |
| 225189_s_at | 0.087681464 | 1.451236981 | 0.152049514 | 0.297092505 |
| 225190_x_at | -0.09319639 | -2.07685509 | 0.042211189 | 0.111627365 |
| 225191_at   | 0.161784521 | 1.26019532  | 0.212597078 | 0.377746912 |
| 225192_at   | -0.0304446  | -0.92150217 | 0.36056883  | 0.543719845 |
| 225193_at   | -0.23873358 | -3.00978899 | 0.003852036 | 0.015887338 |
| 225194_at   | -0.06625686 | -0.82989567 | 0.409967849 | 0.592168421 |
| 225195_at   | 0.021902872 | 0.411327878 | 0.682333478 | 0.810026896 |
| 225196_s_at | -0.10272907 | -2.74820021 | 0.007952935 | 0.028939308 |
| 225197_at   | -0.30282721 | -4.58954531 | 2.40E-05    | 0.000222434 |
| 225198_at   | -0.04051316 | -0.54307912 | 0.589136368 | 0.743650302 |
| 225199_at   | -0.33263678 | -3.68566173 | 0.000500309 | 0.002866276 |
| 225200_at   | 0.135969784 | 1.910282512 | 0.06099708  | 0.148958062 |
| 225201_s_at | -0.12877014 | -3.31354424 | 0.001583383 | 0.007497037 |
| 225202_at   | 0.76313038  | 7.600212448 | 2.71E-10    | 3.98E-08    |
| 225203_at   | 0.019943734 | 0.39401435  | 0.695001432 | 0.819302071 |
| 225204_at   | -0.03180503 | -0.53143664 | 0.597126202 | 0.749586097 |
| 225205_at   | -0.23623378 | -4.19195041 | 9.47E-05    | 0.000703023 |
| 225206_s_at | 0.115605941 | 2.837812143 | 0.00623157  | 0.023649909 |
| 225207_at   | 0.84876321  | 5.109979192 | 3.70E-06    | 4.71E-05    |
| 225208_s_at | -0.08655988 | -2.95409182 | 0.004509636 | 0.018134302 |
| 225209_s_at | 0.187237699 | 4.46293607  | 3.73E-05    | 0.000323116 |
| 225210_s_at | 0.068138231 | 1.024037928 | 0.310028621 | 0.49066182  |
| 225211_at   | 0.002985286 | 0.107967798 | 0.914390275 | 0.954320914 |
| 225212_at   | -0.19861284 | -4.43934861 | 4.05E-05    | 0.000345694 |
| 225213_at   | -0.30671381 | -3.74191978 | 0.000418003 | 0.002461317 |
| 225214_at   | 0.163897589 | 2.943144312 | 0.004650581 | 0.018580707 |
| 225215_s_at | 0.217629022 | 3.999898356 | 0.000180202 | 0.001207252 |
| 225216_at   | 0.118196604 | 2.111949074 | 0.038966537 | 0.104675871 |
| 225217_s_at | -0.00399378 | -0.08634256 | 0.931488623 | 0.964367612 |
| 225218_at   | -0.09896564 | -2.90124233 | 0.005228703 | 0.020435608 |
| 225219_at   | 0.546883773 | 7.475769911 | 4.40E-10    | 5.39E-08    |
| 225220_at   | -0.40563398 | -4.14197688 | 0.000112091 | 0.000810499 |
| 225221_at   | 0.138285278 | 2.219754789 | 0.030320412 | 0.085829736 |
| 225222_at   | 0.02087021  | 0.270145669 | 0.787997861 | 0.878959536 |
| 225223_at   | 0.656158913 | 7.076576572 | 2.08E-09    | 1.50E-07    |
| 225224_at   | 0.11351066  | 1.896997802 | 0.062762657 | 0.152409733 |
| 225225_at   | -0.48741598 | -5.96090933 | 1.54E-07    | 3.51E-06    |
| 225226_at   | 0.07888608  | 2.475350483 | 0.01622391  | 0.051913723 |
| 225227_at   | 0.26050255  | 3.652869923 | 0.000555209 | 0.003129056 |
| 225228_at   | 0.003983036 | 0.054634782 | 0.956615378 | 0.977772055 |
| 225229_at   | -0.00909499 | -0.13165741 | 0.895706528 | 0.94414182  |
| 225230_at   | 0.137835615 | 1.612360894 | 0.112259782 | 0.237474047 |
| 225231_at   | 0.025599897 | 0.616039325 | 0.540255565 | 0.705832019 |
| 225232_at   | -0.22564717 | -3.16220498 | 0.002480857 | 0.010922517 |
| 225233_at   | 0.024502695 | 0.576736041 | 0.566328003 | 0.726590385 |
| 225234_at   | 0.210189683 | 5.652644873 | 4.93E-07    | 8.94E-06    |
| 225235_at   | 0.081570158 | 2.671585255 | 0.00976018  | 0.034219969 |
| 225236_at   | -0.12386621 | -2.49851562 | 0.015298293 | 0.049433252 |
| 225237_s_at | 0.322292049 | 3.760793202 | 0.000393421 | 0.002338447 |
| 225238_at   | 0.104635423 | 1.012728386 | 0.315355665 | 0.496595446 |
| 225239_at   | 1.148801428 | 6.964230287 | 3.22E-09    | 2.02E-07    |
| 225240_s_at | 0.682340038 | 6.926449037 | 3.73E-09    | 2.25E-07    |
| 225241_at   | 0.018042385 | 0.476116651 | 0.63576266  | 0.777940664 |
| 225242_s_at | 0.321156501 | 4.200754535 | 9.19E-05    | 0.000685778 |
| 225243_s_at | -0.46646164 | -5.18782016 | 2.78E-06    | 3.71E-05    |
| 225244_at   | -0.37166267 | -5.09382445 | 3.92E-06    | 4.94E-05    |
| 225245_x_at | 0.086782034 | 1.783411287 | 0.079701107 | 0.183136342 |
| 225246_at   | -0.21840354 | -2.25665963 | 0.027775622 | 0.079994079 |
| 225247_at   | 0.112817332 | 2.296644734 | 0.02523336  | 0.074267937 |
| 225248_at   | 0.015841255 | 0.508142589 | 0.613262003 | 0.761587395 |
| 225249_at   | 0.035476368 | 1.016505037 | 0.31356996  | 0.494685259 |
| 225250_at   | -0.0943632  | -2.51494492 | 0.014671014 | 0.047692535 |
| 225251_at   | -0.0262985  | -0.49780815 | 0.62048337  | 0.767113959 |
| 225252_at   | -0.00058419 | -0.01435992 | 0.988591643 | 0.994757125 |
| 225253_s_at | -0.13208228 | -1.51991613 | 0.133912719 | 0.270978322 |
| 225254_at   | 0.046630813 | 1.960872968 | 0.054654911 | 0.136834759 |
| 225255_at   | -0.07581645 | -1.46872865 | 0.147257425 | 0.290344061 |
| 225256_at   | 0.13425348  | 1.911871678 | 0.060788728 | 0.14857103  |
| 225257_at   | 0.113868642 | 4.357665534 | 5.38E-05    | 0.000438059 |
| 225258_at   | 0.067578607 | 1.355984447 | 0.180309485 | 0.336537545 |
| 225259_at   | -0.43347084 | -5.30147746 | 1.83E-06    | 2.63E-05    |
| 225260_s_at | -0.29824154 | -4.77844138 | 1.23E-05    | 0.000126282 |
| 225261_x_at | 0.185038055 | 4.922217105 | 7.32E-06    | 8.27E-05    |
| 225262_at   | 0.058541512 | 0.700527443 | 0.486371767 | 0.660978137 |



|             |             |             |             |             |
|-------------|-------------|-------------|-------------|-------------|
| 225263_at   | 0.108250531 | 2.098141042 | 0.040216303 | 0.107329931 |
| 225264_at   | 0.076182692 | 1.56405124  | 0.123193362 | 0.254625062 |
| 225265_at   | -0.22606817 | -2.7974779  | 0.006958716 | 0.025920897 |
| 225266_at   | 0.534759737 | 7.471028562 | 4.49E-10    | 5.46E-08    |
| 225267_at   | -0.2025548  | -2.7495009  | 0.007925096 | 0.028866211 |
| 225268_at   | -0.07759148 | -1.18832252 | 0.239502864 | 0.409403787 |
| 225269_s_at | -0.09962379 | -1.83059668 | 0.072250055 | 0.169724019 |
| 225270_at   | 0.491105123 | 9.008424131 | 1.18E-12    | 2.64E-09    |
| 225271_at   | -0.03821507 | -1.06459581 | 0.291428464 | 0.469809217 |
| 225272_at   | 0.160267624 | 3.061200373 | 0.003325412 | 0.014016721 |
| 225273_at   | 0.421050622 | 7.742355613 | 1.56E-10    | 2.79E-08    |
| 225274_at   | 0.020813251 | 0.311962126 | 0.756177242 | 0.859741384 |
| 225275_at   | 0.164988764 | 1.747353845 | 0.085817666 | 0.193861864 |
| 225276_at   | 0.052940017 | 1.686436931 | 0.097032268 | 0.212712323 |
| 225277_at   | 0.10196867  | 3.385847216 | 0.001272418 | 0.006232675 |
| 225278_at   | -0.10804967 | -1.68216037 | 0.097862784 | 0.213987159 |
| 225279_s_at | -0.14386849 | -2.30027831 | 0.025012905 | 0.073753167 |
| 225280_x_at | 0.060105079 | 1.675745489 | 0.09911948  | 0.216140603 |
| 225281_at   | -0.08065245 | -1.53301162 | 0.130657551 | 0.26621141  |
| 225282_at   | -0.43750222 | -6.08288075 | 9.64E-08    | 2.45E-06    |
| 225283_at   | 0.8003625   | 4.955775042 | 6.48E-06    | 7.47E-05    |
| 225284_at   | 0.283548735 | 3.689623028 | 0.00049404  | 0.002835448 |
| 225285_at   | -0.24954042 | -2.39696971 | 0.019741695 | 0.06094466  |
| 225286_at   | 0.109989384 | 3.156475934 | 0.002522798 | 0.011084239 |
| 225287_s_at | 0.053597412 | 1.203664635 | 0.233561879 | 0.402294966 |
| 225288_at   | 0.420827777 | 4.387332217 | 4.85E-05    | 0.000401222 |
| 225289_at   | 0.215614999 | 5.253665642 | 2.18E-06    | 3.04E-05    |
| 225290_at   | -0.11355594 | -1.02721653 | 0.308542465 | 0.489033579 |
| 225291_at   | 0.208233598 | 2.909353682 | 0.005111838 | 0.020066601 |
| 225292_at   | 0.122051016 | 3.478974101 | 0.000956491 | 0.004914247 |
| 225293_at   | 0.438033344 | 4.267803681 | 7.32E-05    | 0.000566922 |
| 225294_s_at | -0.18264233 | -3.52796441 | 0.00082177  | 0.004326878 |
| 225295_at   | -0.41549017 | -3.83128484 | 0.000313299 | 0.001930773 |
| 225296_at   | 0.008688499 | 0.244154254 | 0.807964669 | 0.892100625 |
| 225297_at   | 0.022490429 | 0.45625526  | 0.649893922 | 0.787918989 |
| 225298_at   | 0.109991835 | 2.987294961 | 0.004106062 | 0.016754141 |
| 225299_at   | -0.0378648  | -1.10887856 | 0.272015391 | 0.447900371 |
| 225300_at   | -0.04514468 | -0.99089305 | 0.325814148 | 0.507999089 |
| 225301_s_at | -0.01080469 | -0.24931184 | 0.803991893 | 0.88967034  |
| 225302_at   | -0.12210337 | -1.82007203 | 0.07385927  | 0.172597046 |
| 225303_at   | -0.05354283 | -1.30359922 | 0.197471431 | 0.358435269 |
| 225304_s_at | -0.23971589 | -3.23059212 | 0.002028219 | 0.009215654 |
| 225305_at   | 0.151105421 | 4.505449801 | 3.22E-05    | 0.000284098 |
| 225306_s_at | 0.202136302 | 5.242691864 | 2.27E-06    | 3.14E-05    |
| 225307_at   | 0.007939935 | 0.295195446 | 0.768888564 | 0.867734321 |
| 225308_s_at | 0.269996618 | 3.01070814  | 0.003841974 | 0.015854617 |
| 225309_at   | 0.108690814 | 2.548715708 | 0.01345411  | 0.044442032 |
| 225310_at   | 0.150752882 | 1.856120401 | 0.068469445 | 0.163019361 |
| 225311_at   | 0.028014127 | 0.714782797 | 0.47758288  | 0.653259443 |
| 225312_at   | 0.091863745 | 1.177380643 | 0.243806208 | 0.414713673 |
| 225313_at   | -0.03843677 | -0.72400079 | 0.471947459 | 0.648235167 |
| 225314_at   | -0.63421709 | -7.39966515 | 5.92E-10    | 6.53E-08    |
| 225315_at   | -0.1907787  | -3.92037732 | 0.000234244 | 0.001509562 |
| 225316_at   | 0.217955358 | 3.931066411 | 0.000226162 | 0.00146509  |
| 225317_at   | -0.04362206 | -0.86123789 | 0.392619425 | 0.575404078 |
| 225318_at   | 0.114675837 | 1.802249587 | 0.07665282  | 0.177565325 |
| 225319_s_at | -0.05821357 | -1.30424297 | 0.197253334 | 0.358213978 |
| 225320_at   | 0.009139738 | 0.322897042 | 0.747923228 | 0.854649201 |
| 225321_s_at | 0.200549336 | 3.070356924 | 0.003238982 | 0.01370282  |
| 225322_s_at | 0.053536077 | 1.248770244 | 0.21671776  | 0.382828068 |
| 225323_at   | 0.19574559  | 4.992402476 | 5.68E-06    | 6.68E-05    |
| 225324_at   | 0.109471343 | 2.059996914 | 0.043851512 | 0.115113761 |
| 225325_at   | -0.09858322 | -1.07165747 | 0.288270234 | 0.466400221 |
| 225326_at   | -0.05168863 | -1.09163887 | 0.27946241  | 0.456479442 |
| 225327_at   | -0.04773127 | -0.6668495  | 0.507487048 | 0.678697935 |
| 225328_at   | 0.280085258 | 4.178670714 | 9.90E-05    | 0.000730848 |
| 225329_at   | 0.182090538 | 5.47119573  | 9.73E-07    | 1.56E-05    |
| 225330_at   | 0.301791728 | 4.107312729 | 0.000125946 | 0.000896873 |
| 225331_at   | 0.120459624 | 2.028502278 | 0.047064236 | 0.121646801 |
| 225332_at   | -0.1986301  | -2.21587537 | 0.030599505 | 0.086455498 |
| 225333_at   | -0.02580031 | -0.9914204  | 0.325558867 | 0.507730682 |
| 225334_at   | -0.11107384 | -1.06936407 | 0.28929332  | 0.46761474  |
| 225335_at   | 0.099856575 | 2.845578226 | 0.006099883 | 0.0232231   |
| 225336_at   | 0.473451989 | 7.052934103 | 2.28E-09    | 1.60E-07    |
| 225337_at   | -0.01376835 | -0.32267964 | 0.748087047 | 0.85477499  |

|             |             |             |             |             |
|-------------|-------------|-------------|-------------|-------------|
| 225338_at   | -0.10402324 | -1.24826737 | 0.216900476 | 0.383077137 |
| 225339_at   | 0.255431618 | 4.230582664 | 8.30E-05    | 0.000630034 |
| 225340_s_at | 0.019759162 | 0.291381315 | 0.771789232 | 0.869271324 |
| 225341_at   | -0.09127897 | -2.04213788 | 0.04564916  | 0.118841512 |
| 225342_at   | 0.14088231  | 2.23849448  | 0.029003604 | 0.082900299 |
| 225343_at   | -0.07657316 | -1.32187639 | 0.191349384 | 0.350497425 |
| 225344_at   | -0.29193892 | -2.70424845 | 0.008948096 | 0.031872835 |
| 225345_s_at | 0.21163357  | 4.057206371 | 0.000148935 | 0.001028143 |
| 225346_at   | -0.0585257  | -1.25011196 | 0.21623081  | 0.382254949 |
| 225347_at   | -0.01812728 | -0.36079211 | 0.719552991 | 0.835838525 |
| 225348_at   | 0.082257061 | 1.013575129 | 0.314954706 | 0.496265468 |
| 225349_at   | 0.003110462 | 0.079521756 | 0.936888728 | 0.967298058 |
| 225350_s_at | -0.16712376 | -3.21102147 | 0.002149116 | 0.00968131  |
| 225351_at   | -0.13703753 | -2.64651467 | 0.010428593 | 0.036065517 |
| 225352_at   | -0.02435578 | -0.50335127 | 0.616605294 | 0.764165154 |
| 225353_s_at | 0.521693143 | 3.201095711 | 0.002212991 | 0.009928024 |
| 225354_s_at | -0.14616309 | -2.86164247 | 0.005835607 | 0.022379006 |
| 225355_at   | 0.165195866 | 2.07502169  | 0.042386963 | 0.111992798 |
| 225356_at   | 0.467662026 | 6.458906879 | 2.28E-08    | 8.13E-07    |
| 225357_s_at | 0.070774648 | 2.199335543 | 0.031814955 | 0.089274438 |
| 225358_at   | -0.30222487 | -5.30252034 | 1.82E-06    | 2.62E-05    |
| 225359_at   | -0.17703148 | -2.78577203 | 0.00718394  | 0.026598015 |
| 225360_at   | 0.031793005 | 1.322014501 | 0.191303675 | 0.350442425 |
| 225361_x_at | -0.25802649 | -3.46771915 | 0.000990279 | 0.005055117 |
| 225362_at   | 0.06327509  | 1.417876917 | 0.161525593 | 0.310383602 |
| 225363_at   | 0.06432754  | 1.935345605 | 0.057780904 | 0.142805075 |
| 225364_at   | 0.147255333 | 3.605470446 | 0.000644832 | 0.003546931 |
| 225365_at   | 0.248146356 | 3.07111541  | 0.003231918 | 0.013678113 |
| 225366_at   | 0.135500606 | 3.563646485 | 0.000735226 | 0.003956022 |
| 225367_at   | 0.068909853 | 1.182216676 | 0.241897416 | 0.412314238 |
| 225368_at   | 0.498169454 | 7.132375098 | 1.67E-09    | 1.29E-07    |
| 225369_at   | 0.061478077 | 1.104902103 | 0.273720613 | 0.449912528 |
| 225370_at   | 0.084915063 | 2.8675941   | 0.005740412 | 0.022087086 |
| 225371_at   | 0.072685047 | 1.792420515 | 0.078230908 | 0.180388801 |
| 225372_at   | 0.227674388 | 2.859999725 | 0.005862138 | 0.022465328 |
| 225373_at   | 0.430050087 | 4.844374799 | 9.69E-06    | 0.000104052 |
| 225374_at   | -0.0189489  | -0.63671328 | 0.526792546 | 0.694967455 |
| 225375_at   | 0.015248329 | 0.300939214 | 0.764526663 | 0.864624364 |
| 225376_at   | 0.226857255 | 6.278530739 | 4.56E-08    | 1.37E-06    |
| 225377_at   | -0.39039044 | -6.70212252 | 8.89E-09    | 4.12E-07    |
| 225378_at   | -0.14249549 | -2.30892555 | 0.024495129 | 0.072542329 |
| 225379_at   | -0.0261864  | -0.49863533 | 0.619903967 | 0.766722425 |
| 225380_at   | 0.084235184 | 2.391613684 | 0.020005356 | 0.061575716 |
| 225381_at   | 0.543160255 | 4.876600629 | 8.63E-06    | 9.44E-05    |
| 225382_at   | 0.13502481  | 3.660822926 | 0.000541389 | 0.00306314  |
| 225383_at   | 0.197748983 | 3.814524344 | 0.000330794 | 0.002020201 |
| 225384_at   | 0.322635883 | 3.804937588 | 0.000341218 | 0.002072252 |
| 225385_s_at | -0.09215692 | -1.98728215 | 0.051574336 | 0.130651867 |
| 225386_s_at | -0.09767367 | -1.51898777 | 0.134145904 | 0.271340835 |
| 225387_at   | -0.03299877 | -0.545613   | 0.587404179 | 0.742239463 |
| 225388_at   | -0.04908092 | -0.87871518 | 0.38314672  | 0.56584473  |
| 225389_at   | -0.24563621 | -5.17862235 | 2.88E-06    | 3.81E-05    |
| 225390_s_at | 0.225393181 | 3.231846488 | 0.002020693 | 0.009187995 |
| 225391_at   | -0.29217068 | -4.10175176 | 0.000128317 | 0.000911147 |
| 225392_at   | -0.13494932 | -2.72029941 | 0.008572143 | 0.03079137  |
| 225393_at   | -0.05219747 | -1.53972939 | 0.129012307 | 0.263664856 |
| 225394_s_at | 0.014680641 | 0.2462607   | 0.806341499 | 0.891005006 |
| 225395_s_at | 0.073248052 | 1.327881403 | 0.189369549 | 0.347955022 |
| 225396_at   | 0.133775587 | 3.1113618   | 0.002877069 | 0.012388664 |
| 225397_at   | -0.01883271 | -0.53339555 | 0.595778336 | 0.748578589 |
| 225398_at   | 0.020361089 | 0.385488079 | 0.701272457 | 0.823574621 |
| 225399_at   | 0.098970733 | 1.448938194 | 0.152688254 | 0.29800181  |
| 225400_at   | -0.05878371 | -1.48974722 | 0.141656684 | 0.282405184 |
| 225401_at   | 0.055287975 | 1.347432705 | 0.183030814 | 0.339955662 |
| 225402_at   | -0.0447401  | -1.22103343 | 0.226966275 | 0.394492154 |
| 225403_at   | -0.01823446 | -0.67117321 | 0.504748823 | 0.676726087 |
| 225404_at   | -0.17675608 | -3.34704983 | 0.001431277 | 0.006891469 |
| 225405_at   | -0.23236605 | -3.4071279  | 0.001192525 | 0.005902795 |
| 225406_at   | 0.389653554 | 6.085007014 | 9.56E-08    | 2.44E-06    |
| 225407_at   | 0.291007888 | 3.771454149 | 0.000380154 | 0.002269854 |
| 225408_at   | 0.032785005 | 0.955097402 | 0.343454218 | 0.526376185 |
| 225409_at   | 0.186083192 | 4.084063664 | 0.000136151 | 0.000956136 |
| 225410_at   | -0.10257074 | -2.02229305 | 0.04772106  | 0.122981755 |
| 225411_at   | -0.17267171 | -3.62858295 | 0.000599531 | 0.003335165 |
| 225412_at   | 0.091525286 | 1.743173477 | 0.086551333 | 0.195095182 |

|             |             |             |             |             |
|-------------|-------------|-------------|-------------|-------------|
| 225413_at   | -0.41946063 | -5.99006129 | 1.37E-07    | 3.24E-06    |
| 225414_at   | 0.323327233 | 3.922554244 | 0.000232576 | 0.001500761 |
| 225415_at   | 0.577960922 | 5.612298245 | 5.74E-07    | 1.01E-05    |
| 225416_at   | -0.16755352 | -2.89080788 | 0.005382679 | 0.020936699 |
| 225417_at   | 0.19631112  | 4.536065167 | 2.89E-05    | 0.000260178 |
| 225418_at   | 0.027955192 | 0.900885912 | 0.371338748 | 0.554557861 |
| 225419_at   | 0.063313291 | 1.235835561 | 0.221453723 | 0.388464637 |
| 225420_at   | 0.232952438 | 2.118772193 | 0.038361563 | 0.103423345 |
| 225421_at   | -0.00704301 | -0.08303068 | 0.934110289 | 0.965731266 |
| 225422_at   | 0.235256924 | 3.121086453 | 0.002796976 | 0.012114989 |
| 225423_x_at | -0.00229868 | -0.07476653 | 0.940655269 | 0.969060101 |
| 225424_at   | 0.259376072 | 2.498874234 | 0.015284346 | 0.049398901 |
| 225425_s_at | -0.08100546 | -1.55403668 | 0.125563356 | 0.258483533 |
| 225426_at   | -0.03008457 | -0.41758429 | 0.677778043 | 0.806754478 |
| 225427_s_at | 0.00714786  | 0.146519854 | 0.884014205 | 0.937993605 |
| 225428_s_at | -0.06115956 | -1.08358402 | 0.282990164 | 0.460390827 |
| 225429_at   | -0.0618938  | -1.01895231 | 0.312416474 | 0.493357727 |
| 225430_at   | 0.12274963  | 2.628279185 | 0.010940735 | 0.037491436 |
| 225431_x_at | -0.00142611 | -0.02120297 | 0.983155818 | 0.991765976 |
| 225432_s_at | -0.02179409 | -0.56615324 | 0.573452691 | 0.731434906 |
| 225433_at   | -0.06423607 | -1.05501016 | 0.29575357  | 0.474675664 |
| 225434_at   | -0.01863804 | -0.39469995 | 0.694498097 | 0.818877943 |
| 225435_at   | -0.04487664 | -0.76746187 | 0.445890066 | 0.625898459 |
| 225436_at   | -0.20014982 | -3.46289751 | 0.001005098 | 0.005116738 |
| 225437_s_at | 0.075979853 | 1.986970875 | 0.051609759 | 0.130726783 |
| 225438_at   | -0.18453781 | -4.72235659 | 1.50E-05    | 0.000149722 |
| 225439_at   | -0.03777749 | -0.81429732 | 0.41877337  | 0.601176013 |
| 225440_at   | 0.247221309 | 5.324228996 | 1.68E-06    | 2.46E-05    |
| 225441_x_at | -0.23373781 | -3.6514371  | 0.000557735 | 0.003140913 |
| 225442_at   | 0.489858226 | 5.877733754 | 2.11E-07    | 4.50E-06    |
| 225443_at   | 0.004320223 | 0.095073665 | 0.924580867 | 0.960532258 |
| 225444_at   | 0.204431995 | 4.470732554 | 3.63E-05    | 0.000315556 |
| 225445_at   | 0.165319987 | 4.133546564 | 0.000115318 | 0.000831124 |
| 225446_at   | -0.79455422 | -5.29582939 | 1.87E-06    | 2.67E-05    |
| 225447_at   | -0.29020642 | -4.19336075 | 9.42E-05    | 0.000699905 |
| 225448_at   | -0.31324744 | -3.24673889 | 0.001933322 | 0.008858318 |
| 225449_at   | -0.07115666 | -2.13825359 | 0.0366791   | 0.099869767 |
| 225450_at   | 0.336296208 | 7.17902257  | 1.40E-09    | 1.16E-07    |
| 225451_at   | -0.09689601 | -2.15804985 | 0.03503585  | 0.096334507 |
| 225452_at   | 0.121109908 | 2.890884631 | 0.005381531 | 0.020935879 |
| 225453_x_at | -0.07768722 | -2.27679318 | 0.026468504 | 0.077119134 |
| 225454_at   | 0.022214266 | 0.583367445 | 0.561885834 | 0.723107685 |
| 225455_at   | -0.11455738 | -1.79547144 | 0.077738194 | 0.179521282 |
| 225456_at   | 0.16264505  | 3.307640269 | 0.001611719 | 0.007610243 |
| 225457_s_at | 0.236772909 | 3.362004498 | 0.001367942 | 0.006626497 |
| 225458_at   | -0.00662093 | -0.15310485 | 0.878841886 | 0.93501563  |
| 225459_at   | 0.025543651 | 0.735021536 | 0.465259542 | 0.64310084  |
| 225460_at   | 0.174770465 | 3.082306979 | 0.00312934  | 0.013308257 |
| 225461_at   | 0.13857335  | 2.63417679  | 0.010772646 | 0.037014768 |
| 225462_at   | -0.02854675 | -0.28497378 | 0.77666955  | 0.871981956 |
| 225463_x_at | 0.077770269 | 1.587239655 | 0.117843194 | 0.246358314 |
| 225464_at   | 0.547400303 | 6.307430922 | 4.08E-08    | 1.26E-06    |
| 225465_at   | 0.023521595 | 0.563259292 | 0.575408557 | 0.732853969 |
| 225466_at   | 0.131212634 | 3.225654365 | 0.002058103 | 0.00933057  |
| 225467_s_at | 0.025511734 | 0.771436024 | 0.443549993 | 0.623761369 |
| 225468_at   | -0.00948719 | -0.20481225 | 0.838428966 | 0.910729811 |
| 225469_at   | -0.01151723 | -0.16067688 | 0.872900851 | 0.931555586 |
| 225470_at   | -0.1760117  | -2.64135268 | 0.010571301 | 0.03646989  |
| 225471_s_at | 0.162793073 | 5.450705385 | 1.05E-06    | 1.66E-05    |
| 225472_at   | 0.155207047 | 3.363751338 | 0.001360719 | 0.006599378 |
| 225473_at   | 0.254505117 | 5.834039791 | 2.49E-07    | 5.14E-06    |
| 225474_at   | -0.07866474 | -1.86192293 | 0.06763363  | 0.161519834 |
| 225475_at   | 0.105999781 | 1.964652727 | 0.054204577 | 0.135889996 |
| 225476_at   | -0.00912284 | -0.26646987 | 0.790813317 | 0.880823147 |
| 225477_s_at | -0.05625984 | -0.97382572 | 0.33414822  | 0.51697138  |
| 225478_at   | 0.087953197 | 1.319227064 | 0.19222781  | 0.351725285 |
| 225479_at   | 0.230168121 | 4.363789597 | 5.26E-05    | 0.00043056  |
| 225480_at   | 0.132908692 | 1.944393913 | 0.056655863 | 0.140685843 |
| 225481_at   | 0.757646606 | 6.745570639 | 7.51E-09    | 3.65E-07    |
| 225482_at   | -0.0939353  | -1.28940343 | 0.202326972 | 0.36481873  |
| 225483_at   | -0.29136872 | -4.92200369 | 7.32E-06    | 8.28E-05    |
| 225484_at   | -0.00361601 | -0.08546456 | 0.932183568 | 0.964780418 |
| 225485_at   | -0.4210691  | -5.05233415 | 4.56E-06    | 5.61E-05    |
| 225486_at   | 0.048870658 | 1.153389217 | 0.253436145 | 0.426371849 |
| 225487_at   | 0.017147617 | 0.574719187 | 0.56768245  | 0.727253794 |

|             |             |             |             |             |
|-------------|-------------|-------------|-------------|-------------|
| 225488_at   | 0.095812627 | 3.029416161 | 0.003642427 | 0.01513456  |
| 225489_at   | -0.17275454 | -2.58061308 | 0.012389494 | 0.041532497 |
| 225490_at   | 0.235294334 | 5.225029875 | 2.42E-06    | 3.31E-05    |
| 225491_at   | -0.16609431 | -2.48933329 | 0.015659335 | 0.050394056 |
| 225492_at   | -0.11429791 | -2.25114943 | 0.028143167 | 0.080885815 |
| 225493_at   | 0.416329851 | 6.570150588 | 1.48E-08    | 5.97E-07    |
| 225494_at   | -0.07448801 | -1.79071872 | 0.078506874 | 0.180931786 |
| 225495_x_at | 0.031784744 | 0.839148923 | 0.404797994 | 0.587158763 |
| 225496_s_at | 0.216083302 | 3.404372255 | 0.001202596 | 0.005946717 |
| 225497_at   | -0.18745918 | -3.08147837 | 0.003136829 | 0.013335031 |
| 225498_at   | -0.17297161 | -2.63017762 | 0.010886368 | 0.03732803  |
| 225499_at   | 0.047271197 | 1.14020833  | 0.258841054 | 0.432825397 |
| 225500_x_at | -0.1283992  | -2.92948252 | 0.00483221  | 0.019179497 |
| 225501_at   | 0.032621752 | 0.541137279 | 0.590465466 | 0.74453292  |
| 225502_at   | 0.29371663  | 2.312796547 | 0.024266445 | 0.072027359 |
| 225503_at   | 0.0497887   | 1.34856374  | 0.182669115 | 0.339563632 |
| 225504_at   | 0.381494734 | 7.647015285 | 2.26E-10    | 3.48E-08    |
| 225505_s_at | 0.197885431 | 5.426408    | 1.15E-06    | 1.79E-05    |
| 225506_at   | -0.31272105 | -5.59195803 | 6.19E-07    | 1.08E-05    |
| 225507_at   | 0.297958647 | 4.424192724 | 4.27E-05    | 0.00036146  |
| 225508_at   | -0.45696574 | -5.74184134 | 3.52E-07    | 6.81E-06    |
| 225509_at   | 0.171031237 | 3.090321465 | 0.003057762 | 0.013052292 |
| 225510_at   | -0.11730954 | -2.05257993 | 0.044590508 | 0.116676755 |
| 225511_at   | 0.397737303 | 6.617902523 | 1.23E-08    | 5.23E-07    |
| 225512_at   | 0.130270744 | 2.031724208 | 0.046726498 | 0.12100479  |
| 225513_at   | -0.03556539 | -0.90434405 | 0.369518061 | 0.552731146 |
| 225514_at   | 0.117030211 | 4.292422401 | 6.73E-05    | 0.000527199 |
| 225515_s_at | -0.02656624 | -0.56314724 | 0.575484352 | 0.732896779 |
| 225516_at   | 0.898125857 | 5.887012256 | 2.03E-07    | 4.38E-06    |
| 225517_at   | -0.02433132 | -0.34569395 | 0.730811417 | 0.842987609 |
| 225518_x_at | 0.072191669 | 2.654084596 | 0.010222493 | 0.035487312 |
| 225519_at   | 0.227393306 | 3.100110188 | 0.002972415 | 0.012739084 |
| 225520_at   | -0.02810002 | -0.40178585 | 0.689304113 | 0.814940464 |
| 225521_at   | -0.36012804 | -4.85032557 | 9.48E-06    | 0.000102146 |
| 225522_at   | 0.182498491 | 4.155855932 | 0.000106967 | 0.000779613 |
| 225523_at   | 0.0997594   | 1.710277857 | 0.092507663 | 0.205178782 |
| 225524_at   | 0.535302198 | 6.827172735 | 5.48E-09    | 2.95E-07    |
| 225525_at   | -0.09520848 | -1.46230842 | 0.149002394 | 0.292828592 |
| 225526_at   | 0.358704755 | 4.738650193 | 1.41E-05    | 0.000142398 |
| 225527_at   | 0.140346044 | 2.18471803  | 0.032924278 | 0.091759281 |
| 225528_at   | 0.240682359 | 4.938574505 | 6.90E-06    | 7.88E-05    |
| 225529_at   | -0.43103741 | -6.04120363 | 1.13E-07    | 2.77E-06    |
| 225530_at   | 0.239270462 | 5.348668502 | 1.54E-06    | 2.27E-05    |
| 225531_at   | 0.059451077 | 0.693561081 | 0.490699173 | 0.6648979   |
| 225532_at   | -0.01796787 | -0.23079029 | 0.818282055 | 0.898630372 |
| 225533_at   | 0.275576941 | 6.301917167 | 4.16E-08    | 1.28E-06    |
| 225534_at   | -0.02348535 | -0.26717009 | 0.790276769 | 0.880554709 |
| 225535_s_at | -0.18571096 | -2.92222548 | 0.004931346 | 0.019501967 |
| 225536_at   | 0.29756411  | 5.346308161 | 1.55E-06    | 2.29E-05    |
| 225537_at   | -0.69234001 | -4.79944398 | 1.14E-05    | 0.000118758 |
| 225538_at   | 0.045293367 | 1.139711828 | 0.259046237 | 0.433119882 |
| 225539_at   | 0.009833582 | 0.165640744 | 0.869010148 | 0.929089554 |
| 225540_at   | -0.51367871 | -4.64181917 | 1.99E-05    | 0.000190447 |
| 225541_at   | 0.105963006 | 1.60058396  | 0.114850088 | 0.241581407 |
| 225542_at   | -0.28078174 | -4.96897105 | 6.18E-06    | 7.17E-05    |
| 225543_at   | -0.04297733 | -1.33365805 | 0.187479657 | 0.345447984 |
| 225544_at   | 0.132448121 | 4.027376764 | 0.000164492 | 0.001116736 |
| 225545_at   | -0.0172834  | -0.40052427 | 0.690227761 | 0.815604138 |
| 225546_at   | 0.100916566 | 2.019587281 | 0.048009744 | 0.123547618 |
| 225547_at   | 0.054342076 | 0.744500541 | 0.459550708 | 0.638051515 |
| 225548_at   | 0.163653975 | 2.556378062 | 0.013191062 | 0.04371783  |
| 225549_at   | 0.170129644 | 3.139009904 | 0.002654802 | 0.011581106 |
| 225550_at   | -0.38937215 | -5.61125608 | 5.76E-07    | 1.01E-05    |
| 225551_at   | -0.34908399 | -6.09900375 | 9.07E-08    | 2.34E-06    |
| 225552_x_at | -0.03590423 | -0.94340945 | 0.349347153 | 0.532377092 |
| 225553_at   | 0.105610823 | 2.04811542  | 0.045040508 | 0.117565143 |
| 225554_s_at | -0.06396643 | -2.12491743 | 0.037823721 | 0.102331723 |
| 225555_x_at | 0.103060141 | 3.810502172 | 0.000335129 | 0.002043608 |
| 225556_at   | 0.070538728 | 1.297855801 | 0.199425276 | 0.361023912 |
| 225557_at   | 0.321872199 | 3.839602566 | 0.00030495  | 0.001889221 |
| 225558_at   | -0.259394   | -4.65278254 | 1.92E-05    | 0.000184308 |
| 225559_at   | 0.074812596 | 3.018306275 | 0.003759731 | 0.01556553  |
| 225560_at   | 0.319643884 | 7.878072573 | 9.22E-11    | 2.01E-08    |
| 225561_at   | -0.15456343 | -2.05351152 | 0.044497101 | 0.116459902 |
| 225562_at   | 0.28788645  | 5.153480957 | 3.15E-06    | 4.13E-05    |

|             |             |             |             |             |
|-------------|-------------|-------------|-------------|-------------|
| 225563_at   | 0.267719103 | 3.810023639 | 0.000335649 | 0.002045101 |
| 225564_at   | 0.045975315 | 0.636729919 | 0.526781784 | 0.694967455 |
| 225565_at   | 0.293635828 | 6.168506672 | 6.95E-08    | 1.90E-06    |
| 225566_at   | 0.029151694 | 0.814278829 | 0.418783874 | 0.601176013 |
| 225567_at   | -0.09357976 | -1.20676774 | 0.232373394 | 0.400865855 |
| 225568_at   | 0.028068647 | 1.011483949 | 0.315945567 | 0.497224808 |
| 225569_at   | 0.112236783 | 2.793995687 | 0.007025025 | 0.026130872 |
| 225570_at   | 0.345974444 | 5.425290967 | 1.15E-06    | 1.79E-05    |
| 225571_at   | 1.169774116 | 7.541103981 | 3.42E-10    | 4.61E-08    |
| 225572_at   | 0.182541456 | 2.975914783 | 0.004240438 | 0.017217558 |
| 225573_at   | 0.315885271 | 6.188637376 | 6.43E-08    | 1.79E-06    |
| 225574_at   | 0.144765909 | 2.233299894 | 0.029363465 | 0.083682693 |
| 225575_at   | 0.652615382 | 6.131206067 | 8.01E-08    | 2.12E-06    |
| 225576_at   | 0.081677593 | 2.021048034 | 0.047853707 | 0.12320467  |
| 225577_at   | -0.14805623 | -4.29216971 | 6.73E-05    | 0.00052747  |
| 225578_at   | -0.89514427 | -6.73451235 | 7.84E-09    | 3.74E-07    |
| 225579_at   | 0.23158915  | 2.657034548 | 0.010143189 | 0.035277775 |
| 225580_at   | -0.00650307 | -0.17776141 | 0.859523763 | 0.923493548 |
| 225581_s_at | -0.02339625 | -0.5000572  | 0.618908572 | 0.766036479 |
| 225582_at   | 0.144132199 | 3.857834346 | 0.000287392 | 0.001795711 |
| 225583_at   | 0.003466483 | 0.05573746  | 0.955740672 | 0.977257301 |
| 225584_at   | -0.00485064 | -0.10834141 | 0.914095204 | 0.954246988 |
| 225585_at   | -0.23766894 | -3.72918394 | 0.000435415 | 0.002547732 |
| 225586_at   | 0.030991498 | 0.920699225 | 0.360984488 | 0.544081975 |
| 225587_at   | -0.02154177 | -0.49834332 | 0.620108478 | 0.766890478 |
| 225588_s_at | 0.09806069  | 1.84141162  | 0.070627238 | 0.166723256 |
| 225589_at   | 0.011322311 | 0.172917823 | 0.863312242 | 0.92578824  |
| 225590_at   | 0.039309332 | 0.9067831   | 0.368237348 | 0.551406002 |
| 225591_at   | -0.09281749 | -2.19515952 | 0.032128471 | 0.090001605 |
| 225592_at   | 0.067118886 | 2.211590612 | 0.030910385 | 0.087163035 |
| 225593_at   | -0.15618249 | -3.66842017 | 0.000528494 | 0.003002725 |
| 225594_at   | 0.161510298 | 2.381103202 | 0.020531936 | 0.062888992 |
| 225595_at   | 0.063458726 | 1.512914448 | 0.135679354 | 0.273661057 |
| 225596_at   | 0.030702598 | 1.143257951 | 0.257583308 | 0.431270865 |
| 225597_at   | 0.008005577 | 0.234015923 | 0.815788738 | 0.896885458 |
| 225598_at   | -0.02370253 | -0.56492575 | 0.574281895 | 0.732074687 |
| 225599_s_at | -0.15293874 | -3.20311037 | 0.002199883 | 0.009877152 |
| 225600_at   | -0.11410622 | -2.55218179 | 0.013334536 | 0.044127885 |
| 225601_at   | 0.201368973 | 4.910387791 | 7.64E-06    | 8.54E-05    |
| 225602_at   | 0.382991382 | 5.049144669 | 4.62E-06    | 5.66E-05    |
| 225603_s_at | -0.26772042 | -5.02882502 | 4.97E-06    | 5.99E-05    |
| 225604_s_at | 0.351864229 | 3.438778536 | 0.00108244  | 0.005439221 |
| 225605_at   | 0.152087348 | 4.292794348 | 6.72E-05    | 0.000526713 |
| 225606_at   | 0.38194567  | 7.76579788  | 1.43E-10    | 2.63E-08    |
| 225607_at   | -0.13036817 | -2.87546707 | 0.005616693 | 0.02168088  |
| 225608_at   | 0.079803629 | 2.541165247 | 0.013717959 | 0.04514582  |
| 225609_at   | 0.141373479 | 2.262286178 | 0.027404703 | 0.0791656   |
| 225610_at   | 0.159248005 | 2.88600225  | 0.005454996 | 0.021168245 |
| 225611_at   | 0.281991429 | 5.546415942 | 7.35E-07    | 1.24E-05    |
| 225612_s_at | 0.443370024 | 3.631935581 | 0.000593218 | 0.003306573 |
| 225613_at   | 0.419553012 | 7.275689431 | 9.59E-10    | 9.15E-08    |
| 225614_at   | -0.04879969 | -1.64631783 | 0.10505477  | 0.226019726 |
| 225615_at   | 0.049572461 | 1.280778179 | 0.205320435 | 0.368550551 |
| 225616_at   | -0.09536061 | -3.42524636 | 0.001128273 | 0.005630907 |
| 225617_at   | 0.145803995 | 2.876336474 | 0.005603183 | 0.021641815 |
| 225618_at   | -0.06768771 | -2.23839716 | 0.02901031  | 0.082914164 |
| 225619_at   | 0.369952234 | 2.900928431 | 0.005233274 | 0.0204499   |
| 225620_at   | -0.03265274 | -1.11332328 | 0.270118207 | 0.445811252 |
| 225621_at   | 0.118522403 | 2.01540783  | 0.048458617 | 0.12440189  |
| 225622_at   | 0.006508887 | 0.119630114 | 0.905185592 | 0.949815799 |
| 225623_at   | 0.137022145 | 1.611631604 | 0.112418803 | 0.237742922 |
| 225624_at   | 0.201300794 | 5.061455854 | 4.41E-06    | 5.44E-05    |
| 225625_at   | 0.104733407 | 2.954265811 | 0.004507428 | 0.018127055 |
| 225626_at   | 0.122242816 | 1.981685708 | 0.052214408 | 0.13195919  |
| 225627_s_at | -0.184413   | -2.97806481 | 0.004214741 | 0.017130341 |
| 225628_s_at | 0.075052329 | 2.140396012 | 0.036498069 | 0.099498092 |
| 225629_s_at | 0.101328274 | 2.337693575 | 0.022840467 | 0.068578177 |
| 225630_at   | -0.18435914 | -4.50873052 | 3.18E-05    | 0.000281304 |
| 225631_at   | 0.084465625 | 2.493302859 | 0.015502322 | 0.049983016 |
| 225632_s_at | -0.14026238 | -4.00178186 | 0.00017908  | 0.001200278 |
| 225633_at   | 0.098025003 | 1.458892296 | 0.149937449 | 0.29414883  |
| 225634_at   | 0.373400344 | 5.304882995 | 1.81E-06    | 2.61E-05    |
| 225635_s_at | -0.15927148 | -2.35116819 | 0.022100268 | 0.066786474 |
| 225636_at   | 0.246371271 | 5.241595826 | 2.28E-06    | 3.15E-05    |
| 225637_at   | 0.063482397 | 1.396376926 | 0.167871128 | 0.319567937 |

|             |             |             |             |             |
|-------------|-------------|-------------|-------------|-------------|
| 225638_at   | -0.39456556 | -7.15545755 | 1.53E-09    | 1.22E-07    |
| 225639_at   | 0.091239244 | 1.006131226 | 0.318491395 | 0.499814525 |
| 225640_at   | 0.011012007 | 0.170466674 | 0.865230677 | 0.9271114   |
| 225641_at   | -0.24835837 | -4.46961216 | 3.65E-05    | 0.000316667 |
| 225642_at   | -0.10659562 | -2.85501698 | 0.005943295 | 0.022727623 |
| 225643_at   | -0.00957964 | -0.15453543 | 0.877718904 | 0.934606695 |
| 225644_at   | 0.277389716 | 3.418596239 | 0.001151465 | 0.005728102 |
| 225645_at   | 0.397643481 | 3.522818415 | 0.000835024 | 0.004384267 |
| 225646_at   | 0.028717229 | 0.696263654 | 0.489017857 | 0.663404142 |
| 225647_s_at | 0.05761308  | 0.678012673 | 0.500433724 | 0.672946713 |
| 225648_at   | 0.012732671 | 0.315324452 | 0.753636163 | 0.858280647 |
| 225649_s_at | 0.151195219 | 2.311699618 | 0.024331053 | 0.072171198 |
| 225650_at   | 0.050243264 | 1.247770249 | 0.217081215 | 0.383242886 |
| 225651_at   | -0.27027272 | -4.10551874 | 0.000126706 | 0.000901164 |
| 225652_at   | 0.168489255 | 3.611366902 | 0.000632974 | 0.003492884 |
| 225653_at   | 0.031882882 | 0.977402959 | 0.332389853 | 0.514928328 |
| 225654_at   | 0.007740778 | 0.228935959 | 0.819716257 | 0.89956437  |
| 225655_at   | 0.375593313 | 5.725227797 | 3.75E-07    | 7.17E-06    |
| 225656_at   | 0.301688149 | 3.082202638 | 0.003130282 | 0.013310997 |
| 225657_at   | -0.24330526 | -3.88777911 | 0.000260641 | 0.001650871 |
| 225658_at   | 0.198628447 | 3.11702716  | 0.002830151 | 0.012233787 |
| 225659_at   | -0.00594954 | -0.13746897 | 0.891131642 | 0.941762934 |
| 225660_at   | 0.603095774 | 6.435316235 | 2.49E-08    | 8.61E-07    |
| 225661_at   | -0.01049592 | -0.19391462 | 0.846913755 | 0.915828342 |
| 225662_at   | 0.57403739  | 5.576196559 | 6.57E-07    | 1.13E-05    |
| 225663_at   | 0.286270355 | 4.625473294 | 2.11E-05    | 0.000200154 |
| 225664_at   | 0.058601421 | 1.500934582 | 0.138744831 | 0.27823674  |
| 225665_at   | 0.535315266 | 5.526839869 | 7.91E-07    | 1.32E-05    |
| 225666_at   | 0.329953732 | 2.567959581 | 0.012802314 | 0.04266356  |
| 225667_s_at | -0.9674195  | -7.6271941  | 2.44E-10    | 3.69E-08    |
| 225668_at   | 0.196787131 | 2.96323012  | 0.004395033 | 0.017737295 |
| 225669_at   | 0.108325217 | 2.578977848 | 0.012442154 | 0.04168089  |
| 225670_at   | 0.130907122 | 3.150561255 | 0.002566794 | 0.011249895 |
| 225671_at   | -0.03534128 | -0.84411049 | 0.402042476 | 0.584289879 |
| 225672_at   | -0.05310287 | -2.30984399 | 0.024440698 | 0.072432684 |
| 225673_at   | -0.09964364 | -1.41878052 | 0.161263028 | 0.310117152 |
| 225674_at   | -0.06670132 | -1.25512755 | 0.214417652 | 0.38010254  |
| 225675_at   | -0.03873914 | -0.86480064 | 0.39067668  | 0.573478361 |
| 225676_s_at | -0.13677881 | -2.12715005 | 0.037629953 | 0.101912367 |
| 225677_at   | -0.19815986 | -3.12194866 | 0.002789977 | 0.012088186 |
| 225678_at   | 0.12172223  | 3.553023024 | 0.00076004  | 0.00406507  |
| 225679_at   | -0.30048556 | -3.83749669 | 0.000307044 | 0.00189982  |
| 225680_at   | 0.028219382 | 1.032705809 | 0.305987347 | 0.486056034 |
| 225681_at   | -0.03181204 | -0.50916135 | 0.612552191 | 0.761041435 |
| 225682_s_at | -0.09489547 | -3.28729445 | 0.001713081 | 0.008007635 |
| 225683_x_at | 0.027237958 | 0.928608744 | 0.356903421 | 0.539952192 |
| 225684_at   | 0.225237753 | 4.287501131 | 6.84E-05    | 0.000534464 |
| 225685_at   | -0.25238387 | -4.61744967 | 2.17E-05    | 0.00020489  |
| 225686_at   | 0.176419405 | 3.042514664 | 0.003508512 | 0.014666767 |
| 225687_at   | -0.27751559 | -7.12760259 | 1.71E-09    | 1.31E-07    |
| 225688_s_at | 0.16856665  | 2.822873066 | 0.006492297 | 0.024452533 |
| 225689_at   | -0.24255689 | -4.5610353  | 2.65E-05    | 0.000242118 |
| 225690_at   | -0.01365745 | -0.46964834 | 0.640350241 | 0.781372058 |
| 225691_at   | 0.010327076 | 0.432510857 | 0.666958639 | 0.799498825 |
| 225692_at   | 0.401716031 | 4.4022841   | 4.61E-05    | 0.000384351 |
| 225693_s_at | 0.317154813 | 4.410342092 | 4.48E-05    | 0.00037539  |
| 225694_at   | 0.04347865  | 0.854831123 | 0.396128074 | 0.578762852 |
| 225695_at   | 0.152314998 | 4.293104949 | 6.71E-05    | 0.000526338 |
| 225696_at   | -0.03297251 | -1.20097551 | 0.234595381 | 0.403437617 |
| 225697_at   | 0.058773696 | 1.412977549 | 0.162955007 | 0.312431797 |
| 225698_at   | -0.30344685 | -3.4268372  | 0.001122791 | 0.005609185 |
| 225699_at   | -0.04909765 | -1.40028671 | 0.166703117 | 0.317953897 |
| 225700_at   | -0.19954415 | -4.37021218 | 5.15E-05    | 0.000422289 |
| 225701_at   | 0.134805997 | 3.181368984 | 0.00234527  | 0.010416895 |
| 225702_at   | 0.048845243 | 0.853810898 | 0.396688585 | 0.579135826 |
| 225703_at   | 0.11739512  | 2.310088334 | 0.024426235 | 0.072397302 |
| 225704_at   | 0.129454493 | 2.89214744  | 0.005362679 | 0.020877078 |
| 225705_at   | 0.274269939 | 5.152455821 | 3.17E-06    | 4.14E-05    |
| 225706_at   | -0.37614977 | -4.8532865  | 9.38E-06    | 0.000101351 |
| 225707_at   | 0.320799926 | 5.071596442 | 4.25E-06    | 5.28E-05    |
| 225708_at   | 0.092970446 | 1.225775259 | 0.225189517 | 0.392472406 |
| 225709_at   | 0.102999833 | 2.558970604 | 0.013103121 | 0.043484421 |
| 225710_at   | 0.444394473 | 4.033061037 | 0.000161411 | 0.001100167 |
| 225711_at   | 0.164943501 | 4.25556979  | 7.63E-05    | 0.000587723 |
| 225712_at   | -0.03904985 | -1.08421267 | 0.282713726 | 0.460075078 |

|             |             |             |             |             |
|-------------|-------------|-------------|-------------|-------------|
| 225713_at   | 0.020113496 | 0.531486697 | 0.59709174  | 0.74956389  |
| 225714_s_at | -0.02793884 | -0.60095628 | 0.55018797  | 0.713138073 |
| 225715_at   | -0.03908661 | -1.04848121 | 0.298724586 | 0.477924685 |
| 225716_at   | -0.19575843 | -2.37638469 | 0.020772342 | 0.063486118 |
| 225717_at   | -0.21041628 | -3.12489254 | 0.002766202 | 0.011999134 |
| 225718_at   | -0.07629615 | -1.84129579 | 0.070644455 | 0.16674106  |
| 225719_s_at | -0.10071066 | -2.57043466 | 0.012720595 | 0.042454547 |
| 225720_at   | 0.282291716 | 5.117346369 | 3.60E-06    | 4.60E-05    |
| 225721_at   | 0.328542413 | 5.464064596 | 9.99E-07    | 1.60E-05    |
| 225722_at   | -0.13257922 | -4.5996717  | 2.31E-05    | 0.000215592 |
| 225723_at   | 0.13755643  | 4.035421159 | 0.000160149 | 0.001092499 |
| 225724_at   | 0.012492732 | 0.178830992 | 0.858687619 | 0.923009301 |
| 225725_at   | -0.34660691 | -4.89762197 | 8.00E-06    | 8.86E-05    |
| 225726_s_at | 0.516200108 | 4.07120276  | 0.000142134 | 0.000990222 |
| 225727_at   | 0.310372347 | 2.175953841 | 0.033605557 | 0.093227782 |
| 225728_at   | -0.94651156 | -7.48562977 | 4.24E-10    | 5.22E-08    |
| 225729_at   | 0.156868064 | 4.142576541 | 0.000111865 | 0.000809499 |
| 225730_s_at | -0.03760702 | -0.70493161 | 0.483646917 | 0.658677109 |
| 225731_at   | -0.14947703 | -3.20635932 | 0.002178899 | 0.009797701 |
| 225732_at   | -0.21287699 | -3.74828015 | 0.000409559 | 0.002421487 |
| 225733_at   | -0.05195926 | -1.23836459 | 0.220521799 | 0.387471763 |
| 225734_at   | 0.056843944 | 1.58268101  | 0.118879963 | 0.247772389 |
| 225735_at   | -0.13842987 | -2.78628141 | 0.007174001 | 0.02657663  |
| 225736_at   | -0.12479375 | -2.99689565 | 0.003995791 | 0.016381972 |
| 225737_s_at | -0.11873614 | -3.11770447 | 0.00282459  | 0.012212111 |
| 225738_at   | -0.17925684 | -2.37857794 | 0.020660285 | 0.063195502 |
| 225739_at   | -0.34764003 | -6.00151061 | 1.32E-07    | 3.13E-06    |
| 225740_x_at | 0.476980788 | 7.732942997 | 1.62E-10    | 2.85E-08    |
| 225741_at   | 0.026494533 | 0.648562506 | 0.519156205 | 0.688490478 |
| 225742_at   | 0.073558471 | 1.584694554 | 0.118421124 | 0.247219584 |
| 225743_at   | -0.25113823 | -4.76364522 | 1.29E-05    | 0.00013204  |
| 225744_at   | 0.144843904 | 3.965966351 | 0.000201604 | 0.001326148 |
| 225745_at   | 0.321538998 | 4.522127611 | 3.04E-05    | 0.000271059 |
| 225746_at   | -0.09817716 | -1.53523967 | 0.130110041 | 0.265422582 |
| 225747_at   | 0.005953137 | 0.177603675 | 0.859647086 | 0.923519809 |
| 225748_at   | -0.02007888 | -0.77986495 | 0.438610728 | 0.619055444 |
| 225749_at   | -0.13792893 | -3.6218528  | 0.000612399 | 0.00339612  |
| 225750_at   | -0.27265558 | -5.39358244 | 1.30E-06    | 1.97E-05    |
| 225751_at   | 0.084592703 | 2.156887405 | 0.03513053  | 0.09654976  |
| 225752_at   | -0.15165932 | -1.99802255 | 0.050364796 | 0.128212774 |
| 225753_at   | 0.02591959  | 0.748620867 | 0.457081796 | 0.635986912 |
| 225754_at   | -0.01327695 | -0.35382281 | 0.724742296 | 0.839210366 |
| 225755_at   | 0.148789467 | 5.109233969 | 3.71E-06    | 4.72E-05    |
| 225756_at   | 0.190081124 | 4.092684694 | 0.000132277 | 0.000933392 |
| 225757_s_at | 0.335527633 | 5.092060832 | 3.95E-06    | 4.96E-05    |
| 225758_s_at | -0.04978896 | -1.00969795 | 0.316793484 | 0.49801732  |
| 225759_x_at | 0.421327265 | 5.156901195 | 3.11E-06    | 4.08E-05    |
| 225760_at   | -0.1096801  | -1.21127296 | 0.230655739 | 0.398788257 |
| 225761_at   | 0.059148892 | 0.64565936  | 0.521021728 | 0.689899949 |
| 225762_x_at | 0.088003012 | 1.611019555 | 0.112552401 | 0.23796915  |
| 225763_at   | 0.056976211 | 1.145190617 | 0.256788479 | 0.430423835 |
| 225764_at   | 0.140758581 | 2.60267989  | 0.011698399 | 0.039628958 |
| 225765_at   | 0.181734933 | 3.523588497 | 0.000833027 | 0.004375842 |
| 225766_s_at | 0.041867354 | 0.80879024  | 0.421909278 | 0.603893462 |
| 225767_at   | 0.056427376 | 0.455529369 | 0.650412886 | 0.788163355 |
| 225768_at   | 0.124256101 | 1.326517711 | 0.18981779  | 0.348549106 |
| 225769_at   | -0.22075893 | -3.04370159 | 0.003496607 | 0.014630686 |
| 225770_at   | 0.118692319 | 3.416770202 | 0.001157912 | 0.005756328 |
| 225771_at   | 0.029787729 | 0.642474535 | 0.523072319 | 0.691806334 |
| 225772_s_at | -0.23492451 | -3.89621459 | 0.000253548 | 0.001611603 |
| 225773_at   | 0.021418569 | 0.461328356 | 0.646271871 | 0.78540265  |
| 225774_at   | 0.055515484 | 0.898117771 | 0.372800262 | 0.555910357 |
| 225775_at   | 0.142662834 | 3.941935278 | 0.000218221 | 0.001419611 |
| 225776_at   | 0.279964181 | 4.81050821  | 1.09E-05    | 0.000114896 |
| 225777_at   | 0.116787186 | 2.825885324 | 0.006438929 | 0.02428837  |
| 225778_at   | 0.119532227 | 3.232398704 | 0.002017388 | 0.009175768 |
| 225779_at   | 0.014196045 | 0.379448323 | 0.705727361 | 0.826594523 |
| 225780_at   | 0.129318983 | 2.023256098 | 0.047618672 | 0.122767446 |
| 225781_at   | -0.47223105 | -5.3189584  | 1.71E-06    | 2.50E-05    |
| 225782_at   | 0.476077617 | 4.483466141 | 3.48E-05    | 0.000304346 |
| 225783_at   | -0.03280552 | -0.5030188  | 0.616837587 | 0.764363519 |
| 225784_s_at | -0.01116921 | -0.38378676 | 0.70252629  | 0.824397924 |
| 225785_at   | 0.426583024 | 4.617908312 | 2.17E-05    | 0.000204601 |
| 225786_at   | 0.300036118 | 3.165614435 | 0.002456209 | 0.010832139 |
| 225787_at   | -0.05744211 | -1.42033469 | 0.160812193 | 0.30947056  |

|             |             |             |             |             |
|-------------|-------------|-------------|-------------|-------------|
| 225788_at   | -0.05797954 | -1.64385824 | 0.105563683 | 0.226785964 |
| 225789_at   | -0.03887901 | -1.52732056 | 0.132064369 | 0.268282763 |
| 225790_at   | 0.344368084 | 3.97772658  | 0.000193923 | 0.00128321  |
| 225791_at   | 0.012067046 | 0.360925898 | 0.719453503 | 0.835832053 |
| 225792_at   | -0.89391257 | -5.89445125 | 1.98E-07    | 4.30E-06    |
| 225793_at   | 0.245814171 | 4.422186935 | 4.30E-05    | 0.000363157 |
| 225794_s_at | -0.12780165 | -3.28380816 | 0.001731042 | 0.008080605 |
| 225795_at   | -0.27892017 | -4.04160703 | 0.000156884 | 0.001073404 |
| 225796_at   | 0.14114947  | 1.103714787 | 0.274231219 | 0.450453604 |
| 225797_at   | -0.09527655 | -1.57418504 | 0.12083176  | 0.250857667 |
| 225798_at   | -0.36572892 | -4.71263728 | 1.55E-05    | 0.000154402 |
| 225799_at   | -0.15400157 | -3.25046682 | 0.001912015 | 0.008782298 |
| 225800_at   | -0.31389277 | -4.63292985 | 2.06E-05    | 0.000195812 |
| 225801_at   | 0.015287142 | 0.44614769  | 0.657135735 | 0.792549392 |
| 225802_at   | 0.024764852 | 0.690851678 | 0.492387932 | 0.666269317 |
| 225803_at   | 0.220317443 | 3.098931103 | 0.002982576 | 0.012780181 |
| 225804_at   | -0.07878624 | -1.61238149 | 0.112255295 | 0.237474047 |
| 225805_at   | -0.06734919 | -1.20930181 | 0.231406114 | 0.399660008 |
| 225806_at   | 0.182230813 | 3.553305563 | 0.00075937  | 0.004063431 |
| 225807_at   | -0.02320989 | -0.46380396 | 0.644507467 | 0.784132621 |
| 225808_at   | 0.061402671 | 1.149094414 | 0.255188333 | 0.428452877 |
| 225809_at   | -0.58475835 | -4.20015361 | 9.21E-05    | 0.000686718 |
| 225810_at   | 0.366358679 | 4.914933976 | 7.51E-06    | 8.43E-05    |
| 225811_at   | -0.29147113 | -3.55651003 | 0.000751809 | 0.004032142 |
| 225812_at   | -0.01624466 | -0.28524289 | 0.776464402 | 0.871933867 |
| 225813_at   | -0.19479292 | -2.91299732 | 0.005060134 | 0.019905599 |
| 225814_at   | 0.092358388 | 1.813860111 | 0.074823098 | 0.174320696 |
| 225815_at   | -0.85192183 | -7.56910697 | 3.06E-10    | 4.32E-08    |
| 225816_at   | 0.271696608 | 5.073511784 | 4.22E-06    | 5.25E-05    |
| 225817_at   | 0.667100833 | 7.137440409 | 1.64E-09    | 1.28E-07    |
| 225818_s_at | -0.51190455 | -6.28486588 | 4.45E-08    | 1.34E-06    |
| 225819_at   | -0.03445951 | -1.03563532 | 0.304629642 | 0.484605537 |
| 225820_at   | 0.064079791 | 1.723888946 | 0.090003384 | 0.200900249 |
| 225821_s_at | 0.031846733 | 0.674138864 | 0.502875289 | 0.675031609 |
| 225822_at   | 0.190820848 | 1.627963669 | 0.108900989 | 0.23217111  |
| 225823_at   | -0.18330365 | -3.1087349  | 0.002899069 | 0.012465384 |
| 225824_at   | 0.174411193 | 4.013561603 | 0.000172218 | 0.001161135 |
| 225825_at   | 0.217004356 | 5.4775516   | 9.50E-07    | 1.54E-05    |
| 225826_at   | 0.097233444 | 2.599690706 | 0.011789915 | 0.039875502 |
| 225827_at   | 0.156461264 | 2.297891652 | 0.025157514 | 0.07408669  |
| 225828_at   | -0.11682061 | -2.9243842  | 0.004901661 | 0.019406896 |
| 225829_at   | -0.01830442 | -0.63462963 | 0.52814143  | 0.695848671 |
| 225830_at   | 0.039918867 | 1.007767639 | 0.317711636 | 0.499004338 |
| 225831_at   | -0.08219875 | -2.68281066 | 0.009473784 | 0.033400462 |
| 225832_s_at | -0.18742298 | -3.75000171 | 0.000407302 | 0.002409096 |
| 225833_at   | -0.23249757 | -3.70037827 | 0.000477395 | 0.002754774 |
| 225834_at   | -0.04998312 | -1.27527562 | 0.20724732  | 0.370981585 |
| 225835_at   | 0.138943413 | 1.033608277 | 0.305568653 | 0.485580794 |
| 225836_s_at | -0.15039704 | -3.11049664 | 0.002884297 | 0.01241381  |
| 225837_at   | -0.18386629 | -2.91084686 | 0.00509059  | 0.019999004 |
| 225838_at   | 0.237598049 | 4.108375848 | 0.000125497 | 0.000894249 |
| 225839_at   | 0.126412498 | 2.462626553 | 0.016753529 | 0.053291724 |
| 225840_at   | -0.36201754 | -3.78610958 | 0.000362615 | 0.002179101 |
| 225841_at   | -0.42858876 | -6.03416451 | 1.16E-07    | 2.84E-06    |
| 225842_at   | -0.04874891 | -0.90269027 | 0.370388052 | 0.55364336  |
| 225843_at   | 0.030524406 | 0.988986003 | 0.326738433 | 0.508943052 |
| 225844_at   | -0.26805002 | -4.98508856 | 5.83E-06    | 6.82E-05    |
| 225845_at   | 0.08172736  | 1.024103035 | 0.309998131 | 0.490643166 |
| 225846_at   | -0.02744238 | -0.98421044 | 0.329060652 | 0.511467688 |
| 225847_at   | -1.17063897 | -6.60132173 | 1.31E-08    | 5.51E-07    |
| 225848_at   | -0.0408292  | -1.3723556  | 0.175186036 | 0.32949307  |
| 225849_s_at | 0.013321574 | 0.150792622 | 0.880657481 | 0.936096466 |
| 225850_at   | -0.14645559 | -1.42443984 | 0.159626071 | 0.30784536  |
| 225851_at   | 0.088625908 | 1.993928768 | 0.050822915 | 0.129136261 |
| 225852_at   | -0.11456164 | -2.35419666 | 0.02193688  | 0.066395979 |
| 225853_at   | -0.08808513 | -2.02491051 | 0.047443222 | 0.122421043 |
| 225854_x_at | 0.012342526 | 0.364446638 | 0.716837121 | 0.834173034 |
| 225855_at   | 0.191000323 | 4.239473067 | 8.06E-05    | 0.000614181 |
| 225856_at   | -0.04068969 | -0.90527991 | 0.369026316 | 0.552291344 |
| 225857_s_at | 0.083418824 | 1.35257992  | 0.181389155 | 0.337920418 |
| 225858_s_at | 0.02460399  | 0.636301911 | 0.527058712 | 0.695051873 |
| 225859_at   | -0.08776843 | -1.57529985 | 0.120574195 | 0.250450916 |
| 225860_at   | -0.14403499 | -3.63109023 | 0.000594804 | 0.003312933 |
| 225861_at   | 0.077694657 | 1.520570525 | 0.133748541 | 0.270768699 |
| 225862_at   | -0.1023524  | -2.01225412 | 0.048799714 | 0.125105077 |



|             |             |             |             |             |
|-------------|-------------|-------------|-------------|-------------|
| 225863_s_at | -0.19455675 | -3.6195928  | 0.000616779 | 0.003416593 |
| 225864_at   | 0.371556759 | 4.167308719 | 0.000102911 | 0.000755468 |
| 225865_x_at | 0.180062868 | 5.13065814  | 3.43E-06    | 4.42E-05    |
| 225866_at   | -0.0893306  | -1.55233987 | 0.125968501 | 0.259222038 |
| 225867_at   | 0.242495233 | 4.100966491 | 0.000128656 | 0.000913114 |
| 225868_at   | 0.612270657 | 5.81707472  | 2.65E-07    | 5.41E-06    |
| 225869_s_at | 0.022613864 | 0.344935064 | 0.7313789   | 0.843246563 |
| 225870_s_at | -0.28271095 | -4.91447845 | 7.52E-06    | 8.44E-05    |
| 225871_at   | -0.51845784 | -6.68251507 | 9.59E-09    | 4.34E-07    |
| 225872_at   | 0.307955241 | 3.836561543 | 0.000307978 | 0.001904017 |
| 225873_at   | -0.01308279 | -0.3903084  | 0.697724539 | 0.821051242 |
| 225874_at   | -0.17837093 | -4.54931875 | 2.76E-05    | 0.000250334 |
| 225875_s_at | -0.10063058 | -1.52330391 | 0.133064503 | 0.269762703 |
| 225876_at   | 0.082159488 | 1.088151424 | 0.280986012 | 0.458164357 |
| 225877_at   | 0.011484272 | 0.455735117 | 0.650265772 | 0.788101618 |
| 225878_at   | 0.418649927 | 7.073799683 | 2.10E-09    | 1.51E-07    |
| 225879_at   | 0.047607362 | 2.030635251 | 0.046840413 | 0.121222522 |
| 225880_at   | 0.154886133 | 2.77899067  | 0.007317466 | 0.027007863 |
| 225881_at   | -0.18885001 | -2.81297731 | 0.006670507 | 0.025003633 |
| 225882_at   | -0.05519184 | -1.49573902 | 0.1400912   | 0.280193534 |
| 225883_at   | 0.058671223 | 1.563611832 | 0.123296593 | 0.254767734 |
| 225884_s_at | 0.158155594 | 2.918412411 | 0.004984188 | 0.019669169 |
| 225885_at   | 0.107285552 | 1.631874563 | 0.108071998 | 0.230910443 |
| 225886_at   | -0.01968744 | -0.37017928 | 0.712584298 | 0.831159585 |
| 225887_at   | 0.060788868 | 1.13963374  | 0.259078518 | 0.433133851 |
| 225888_at   | -0.04228814 | -0.77025773 | 0.444243048 | 0.624441274 |
| 225889_at   | 0.155435552 | 1.960532136 | 0.054695676 | 0.136906141 |
| 225890_at   | 0.243907386 | 4.008112193 | 0.00017536  | 0.00117888  |
| 225891_at   | 0.234680153 | 4.768808277 | 1.27E-05    | 0.000130011 |
| 225892_at   | 0.039075918 | 0.472738151 | 0.638157051 | 0.779804755 |
| 225893_at   | 0.216830673 | 4.385812567 | 4.88E-05    | 0.000403036 |
| 225894_at   | 0.116877233 | 2.474891281 | 0.016242758 | 0.051951236 |
| 225895_at   | 0.836741129 | 6.954147425 | 3.35E-09    | 2.08E-07    |
| 225896_at   | -0.1915288  | -3.39372411 | 0.001242273 | 0.006115175 |
| 225897_at   | 0.046352931 | 0.495999209 | 0.621751291 | 0.767626418 |
| 225898_at   | -0.07926706 | -0.96932438 | 0.336369546 | 0.519185901 |
| 225899_x_at | 0.166693943 | 1.549312227 | 0.126694002 | 0.260184845 |
| 225900_at   | -0.11886427 | -2.10161396 | 0.03989873  | 0.106667109 |
| 225901_at   | 0.069201589 | 1.043725716 | 0.300901412 | 0.480378063 |
| 225902_at   | 0.055226232 | 1.281149619 | 0.205190847 | 0.368392293 |
| 225903_at   | 0.081884408 | 1.828059413 | 0.072635284 | 0.170360332 |
| 225904_at   | -0.24388985 | -3.04336746 | 0.003499954 | 0.014639022 |
| 225905_s_at | -0.12381956 | -4.06880365 | 0.000143278 | 0.000996035 |
| 225906_at   | 0.062752857 | 1.408302883 | 0.164327967 | 0.314564849 |
| 225907_at   | -0.01711389 | -0.57370531 | 0.568363937 | 0.727682014 |
| 225908_at   | -0.10491285 | -2.2990119  | 0.025089545 | 0.073930372 |
| 225909_at   | 0.03098581  | 1.138340581 | 0.259613516 | 0.433677493 |
| 225910_at   | 0.016796041 | 0.334225876 | 0.739403034 | 0.848899322 |
| 225911_at   | -0.08880756 | -1.40480162 | 0.165362138 | 0.316030133 |
| 225912_at   | 0.647496437 | 8.161565283 | 3.07E-11    | 1.12E-08    |
| 225913_at   | -0.05106546 | -1.19077151 | 0.23854727  | 0.408212423 |
| 225914_s_at | 0.271393733 | 3.145525372 | 0.00260482  | 0.011393093 |
| 225915_at   | 0.528258677 | 4.948612734 | 6.65E-06    | 7.64E-05    |
| 225916_at   | -0.04116825 | -1.01119666 | 0.316081856 | 0.497283214 |
| 225917_at   | 0.438105759 | 6.245925194 | 5.16E-08    | 1.51E-06    |
| 225918_at   | 0.212805664 | 4.344073413 | 5.63E-05    | 0.000455555 |
| 225919_s_at | 0.228188919 | 2.249360247 | 0.028263432 | 0.081163612 |
| 225920_at   | 0.081402094 | 2.681528258 | 0.009506109 | 0.033484159 |
| 225921_at   | 0.168496594 | 2.857389193 | 0.005904528 | 0.022594844 |
| 225922_at   | 0.197897279 | 2.690431837 | 0.009283747 | 0.032874513 |
| 225923_at   | -0.02696565 | -0.49475848 | 0.622621609 | 0.768169286 |
| 225924_at   | 0.222794394 | 4.47198882  | 3.62E-05    | 0.000314668 |
| 225925_s_at | -0.02863517 | -0.4475981  | 0.656094499 | 0.791849185 |
| 225926_at   | -0.14231944 | -2.48197466 | 0.015954201 | 0.05119365  |
| 225927_at   | 0.228400146 | 4.515741985 | 3.11E-05    | 0.000276023 |
| 225928_at   | -0.24335489 | -4.55238385 | 2.73E-05    | 0.000248211 |
| 225929_s_at | 0.398490111 | 7.769678839 | 1.40E-10    | 2.62E-08    |
| 225930_at   | -0.3492899  | -4.89186327 | 8.16E-06    | 9.01E-05    |
| 225931_s_at | 0.212998602 | 4.39886803  | 4.66E-05    | 0.00038805  |
| 225932_s_at | 0.391986553 | 4.603729384 | 2.28E-05    | 0.000213199 |
| 225933_at   | 0.038240651 | 1.237321551 | 0.220905798 | 0.38778907  |
| 225934_at   | -0.0098594  | -0.23256283 | 0.8169117   | 0.897777161 |
| 225935_at   | 0.247895359 | 5.186752458 | 2.79E-06    | 3.72E-05    |
| 225936_at   | -0.3782972  | -4.89761737 | 8.00E-06    | 8.86E-05    |
| 225937_at   | 0.260178527 | 4.770966742 | 1.26E-05    | 0.000129128 |

|             |             |             |             |             |
|-------------|-------------|-------------|-------------|-------------|
| 225939_at   | -0.10909327 | -2.2326435  | 0.029409217 | 0.083764044 |
| 225940_at   | -0.40033039 | -5.2960427  | 1.87E-06    | 2.67E-05    |
| 225941_at   | -0.5327566  | -6.18207037 | 6.60E-08    | 1.82E-06    |
| 225942_at   | -0.06542757 | -1.92609497 | 0.058950737 | 0.144926913 |
| 225943_at   | 0.11180294  | 1.498674943 | 0.139329129 | 0.278982859 |
| 225944_at   | 0.11701833  | 2.289434454 | 0.025675932 | 0.075276093 |
| 225945_at   | -0.12582419 | -1.97313813 | 0.053205152 | 0.133887648 |
| 225946_at   | 0.718140991 | 6.939368188 | 3.54E-09    | 2.17E-07    |
| 225947_at   | 0.007044205 | 0.285460721 | 0.776298353 | 0.871933867 |
| 225948_at   | -0.08023299 | -2.06151859 | 0.043701217 | 0.114786647 |
| 225949_at   | 0.220294915 | 2.854207792 | 0.005956572 | 0.022766708 |
| 225950_at   | 0.038633105 | 0.589785475 | 0.557603112 | 0.719597998 |
| 225951_s_at | 0.253704918 | 2.948267189 | 0.004584124 | 0.018367732 |
| 225952_at   | -0.10896581 | -2.84162267 | 0.006166632 | 0.02344726  |
| 225953_at   | 0.041557572 | 0.721476717 | 0.473486807 | 0.64950777  |
| 225954_s_at | 0.289820745 | 3.55449743  | 0.000756549 | 0.004052218 |
| 225955_at   | 0.174220614 | 3.115411463 | 0.002843458 | 0.012284167 |
| 225956_at   | 0.356481404 | 4.477926958 | 3.54E-05    | 0.00030937  |
| 225957_at   | 0.389221319 | 5.334556761 | 1.62E-06    | 2.38E-05    |
| 225958_at   | 0.105316661 | 3.28277664  | 0.00173639  | 0.00810134  |
| 225959_s_at | -0.32646707 | -6.54727597 | 1.62E-08    | 6.36E-07    |
| 225960_at   | 0.018447064 | 0.605729675 | 0.547034663 | 0.710720461 |
| 225961_at   | -0.18097384 | -2.51064934 | 0.014832736 | 0.048127244 |
| 225962_at   | -0.26310681 | -4.07732641 | 0.000139254 | 0.000973343 |
| 225963_at   | 0.023639288 | 0.620615601 | 0.537260312 | 0.703316868 |
| 225964_at   | 0.073009712 | 1.210918926 | 0.230790383 | 0.398966611 |
| 225965_at   | 0.008180958 | 0.190052518 | 0.849925181 | 0.917685934 |
| 225966_at   | -0.02973987 | -0.72841625 | 0.469261441 | 0.646083291 |
| 225967_s_at | -0.15740094 | -2.7757729  | 0.00738162  | 0.027198317 |
| 225968_at   | -0.09858276 | -1.88534223 | 0.064347231 | 0.155418985 |
| 225969_at   | -0.20747341 | -4.387412   | 4.85E-05    | 0.000401186 |
| 225970_at   | 0.005598589 | 0.125321123 | 0.900698525 | 0.94704196  |
| 225971_at   | 0.20020453  | 2.722982715 | 0.008510725 | 0.030616    |
| 225972_at   | 0.080319939 | 1.418256182 | 0.161415347 | 0.31027161  |
| 225973_at   | 0.001545521 | 0.023464814 | 0.981359271 | 0.990588176 |
| 225974_at   | 0.168637062 | 1.730942041 | 0.088727874 | 0.198751269 |
| 225975_at   | 0.264847486 | 4.878289376 | 8.57E-06    | 9.39E-05    |
| 225976_at   | -0.19141929 | -3.33523879 | 0.001483247 | 0.007098111 |
| 225977_at   | 0.026473141 | 0.658859864 | 0.512567897 | 0.683342315 |
| 225978_at   | -0.03527138 | -0.44294613 | 0.659436518 | 0.794066434 |
| 225979_at   | -0.05242653 | -1.22386678 | 0.225903391 | 0.393425078 |
| 225980_at   | 0.078019787 | 1.701124108 | 0.09422391  | 0.208128057 |
| 225981_at   | -0.0107755  | -0.30705034 | 0.759894187 | 0.861740447 |
| 225982_at   | 0.047829944 | 1.709182261 | 0.092711711 | 0.205534214 |
| 225983_s_at | 0.050279723 | 1.399560829 | 0.166919492 | 0.318244356 |
| 225984_at   | 0.076380341 | 1.209347793 | 0.23138859  | 0.399660008 |
| 225985_at   | -0.01469553 | -0.42364155 | 0.673379102 | 0.803595697 |
| 225986_x_at | 0.149787803 | 2.645485039 | 0.010456917 | 0.036149485 |
| 225987_at   | 0.005332258 | 0.126659319 | 0.899643895 | 0.946244733 |
| 225988_at   | 0.107200189 | 1.614805787 | 0.111728002 | 0.236662773 |
| 225989_at   | -0.03195929 | -0.64068306 | 0.524227649 | 0.692790292 |
| 225990_at   | 0.518744248 | 5.614735786 | 5.69E-07    | 1.00E-05    |
| 225991_at   | -0.01668972 | -0.4478941  | 0.655882092 | 0.791678346 |
| 225992_at   | 0.043586075 | 1.023089677 | 0.310472913 | 0.491191031 |
| 225993_at   | -0.05486447 | -1.45729014 | 0.150377568 | 0.294792273 |
| 225994_at   | -0.04349664 | -0.74948097 | 0.456567386 | 0.635469001 |
| 225995_x_at | 0.108769801 | 2.717735445 | 0.008631209 | 0.030976139 |
| 225996_at   | -0.95314246 | -6.19247211 | 6.34E-08    | 1.77E-06    |
| 225997_at   | 0.312796378 | 3.432390094 | 0.001103853 | 0.005529411 |
| 225998_at   | 0.278726379 | 3.455666345 | 0.001027718 | 0.005215256 |
| 225999_at   | 0.112224432 | 1.837924438 | 0.071147119 | 0.167714885 |
| 226000_at   | 0.030187792 | 0.510834294 | 0.611387392 | 0.760204535 |
| 226001_at   | 0.408522745 | 5.897522888 | 1.95E-07    | 4.26E-06    |
| 226002_at   | 0.254540286 | 2.511271723 | 0.014809205 | 0.048064917 |
| 226003_at   | -0.11290822 | -1.33588533 | 0.186754806 | 0.344675491 |
| 226004_at   | 0.032093525 | 1.044287877 | 0.300643519 | 0.480092906 |
| 226005_at   | 0.142669939 | 3.056225919 | 0.003373264 | 0.014183642 |
| 226006_at   | -0.01734167 | -0.28366308 | 0.777668974 | 0.87253651  |
| 226007_at   | -0.05367444 | -1.13839408 | 0.259591366 | 0.433662075 |
| 226008_at   | -0.1575002  | -4.02385786 | 0.000166427 | 0.001127683 |
| 226009_at   | -0.17110867 | -4.44806388 | 3.93E-05    | 0.000337446 |
| 226010_at   | -0.66629934 | -7.14523157 | 1.59E-09    | 1.26E-07    |
| 226011_at   | 0.082392161 | 2.528945404 | 0.014154922 | 0.046279657 |
| 226012_at   | -0.04969441 | -1.19915711 | 0.235296123 | 0.40425381  |
| 226013_at   | 0.091545938 | 1.954570799 | 0.055412892 | 0.138290873 |

|             |              |             |             |             |
|-------------|--------------|-------------|-------------|-------------|
| 226014_at   | 0.025510023  | 0.817593746 | 0.416903027 | 0.59921859  |
| 226015_at   | 0.036367921  | 0.696005013 | 0.489178624 | 0.663561814 |
| 226016_at   | -0.33642031  | -3.67761242 | 0.000513284 | 0.002929715 |
| 226017_at   | 0.084464346  | 2.154936617 | 0.035289924 | 0.096866311 |
| 226018_at   | 0.488810335  | 5.646021675 | 5.06E-07    | 9.14E-06    |
| 226019_at   | 0.438295551  | 5.408240438 | 1.23E-06    | 1.89E-05    |
| 226020_s_at | 0.343780673  | 4.289874887 | 6.78E-05    | 0.000530791 |
| 226021_at   | -0.17196391  | -3.69219125 | 0.000490015 | 0.002816329 |
| 226022_at   | 0.338963448  | 4.583705963 | 2.45E-05    | 0.000226402 |
| 226023_at   | 0.080658733  | 1.407003709 | 0.16471112  | 0.315068884 |
| 226024_at   | -0.07696186  | -1.95383743 | 0.055501677 | 0.138466057 |
| 226025_at   | -0.12371488  | -1.35386008 | 0.180982605 | 0.337371203 |
| 226026_at   | 0.022757094  | 0.333615598 | 0.739861188 | 0.849062146 |
| 226027_at   | 0.025398391  | 0.759857614 | 0.450387684 | 0.629845363 |
| 226028_at   | 0.229368803  | 4.19005684  | 9.53E-05    | 0.000706958 |
| 226029_at   | 0.510963376  | 7.376103861 | 6.49E-10    | 6.97E-08    |
| 226030_at   | -0.18816945  | -3.10121365 | 0.002962935 | 0.012709424 |
| 226031_at   | -0.29141454  | -3.85435919 | 0.000290662 | 0.001813015 |
| 226032_at   | 0.162676963  | 3.827609875 | 0.000317057 | 0.001949879 |
| 226033_at   | 0.035450115  | 0.478037438 | 0.634403108 | 0.777104553 |
| 226034_at   | -0.06625245  | -1.63633131 | 0.107133556 | 0.229289    |
| 226035_at   | 0.2696095    | 2.859070794 | 0.00587719  | 0.022499859 |
| 226036_x_at | -0.04561813  | -1.32401457 | 0.190642648 | 0.349503701 |
| 226037_s_at | 0.046058217  | 0.994832595 | 0.323910309 | 0.505930854 |
| 226038_at   | -0.14617214  | -2.47165338 | 0.01637622  | 0.05227384  |
| 226039_at   | -0.31902475  | -4.62615553 | 2.11E-05    | 0.000199787 |
| 226040_at   | 0.646812859  | 8.560876296 | 6.57E-12    | 4.52E-09    |
| 226041_at   | -0.02217862  | -0.30284776 | 0.763078975 | 0.863704185 |
| 226042_at   | 0.053209406  | 1.779818074 | 0.080293868 | 0.184263745 |
| 226043_at   | 0.154821478  | 3.636521911 | 0.000584684 | 0.003268957 |
| 226044_at   | 0.005178001  | 0.142875861 | 0.886878649 | 0.93925616  |
| 226045_at   | -0.06736252  | -1.15032513 | 0.254685347 | 0.427940904 |
| 226046_at   | -0.0505719   | -0.85125489 | 0.398095007 | 0.580459432 |
| 226047_at   | 0.566542284  | 5.889361674 | 2.02E-07    | 4.36E-06    |
| 226048_at   | 0.025560149  | 0.628489979 | 0.532126506 | 0.699176746 |
| 226049_at   | -0.12315089  | -2.63673294 | 0.010700527 | 0.036820752 |
| 226050_at   | 0.082427783  | 1.422678059 | 0.160134277 | 0.308505954 |
| 226051_at   | 0.003981481  | 0.063602581 | 0.949503262 | 0.974066333 |
| 226052_at   | 0.048139254  | 1.138272621 | 0.259641654 | 0.433693556 |
| 226053_at   | 0.127975175  | 2.888268375 | 0.005420783 | 0.021051932 |
| 226054_at   | 0.091868987  | 3.219265004 | 0.002097388 | 0.009484617 |
| 226055_at   | 0.405724223  | 6.073927557 | 9.98E-08    | 2.51E-06    |
| 226056_at   | 0.177355609  | 3.597376421 | 0.000661454 | 0.00362187  |
| 226057_at   | 0.023722991  | 0.911638204 | 0.365696442 | 0.549036059 |
| 226058_at   | 0.161665238  | 3.174694455 | 0.002391683 | 0.010587272 |
| 226059_at   | -0.18069079  | -3.62474569 | 0.000606836 | 0.003368196 |
| 226060_at   | 0.070855033  | 1.990486255 | 0.051210919 | 0.12987847  |
| 226061_s_at | -0.05001606  | -1.88368794 | 0.064574854 | 0.155814005 |
| 226062_x_at | 0.496289801  | 7.82338904  | 1.14E-10    | 2.24E-08    |
| 226063_at   | 0.039084641  | 0.994563229 | 0.324040247 | 0.506063064 |
| 226064_s_at | -0.51812601  | -7.6744823  | 2.03E-10    | 3.31E-08    |
| 226065_at   | -0.2130035   | -3.41394238 | 0.001167963 | 0.0057992   |
| 226066_at   | 0.077178748  | 1.474748019 | 0.145635998 | 0.28804939  |
| 226067_at   | -0.01417709  | -0.46656636 | 0.642541082 | 0.782827087 |
| 226068_at   | 0.2857348    | 3.823542507 | 0.000321267 | 0.00197118  |
| 226069_at   | -0.36014457  | -4.7038951  | 1.60E-05    | 0.000158658 |
| 226070_at   | 0.098685802  | 3.254949568 | 0.001886686 | 0.008686239 |
| 226071_at   | 0.217512299  | 3.683763736 | 0.00050334  | 0.002881792 |
| 226072_at   | 0.123050948  | 3.921515735 | 0.00023337  | 0.001505204 |
| 226073_at   | 0.221300662  | 3.83993132  | 0.000304625 | 0.001887466 |
| 226074_at   | -0.15272393  | -4.25417747 | 7.66E-05    | 0.000589909 |
| 226075_at   | 0.195038929  | 3.796629547 | 0.000350506 | 0.002118582 |
| 226076_s_at | 0.053352888  | 1.526422682 | 0.132287419 | 0.268646951 |
| 226077_at   | -0.23678153  | -3.42697586 | 0.001122314 | 0.005608058 |
| 226078_at   | -0.07430314  | -2.16972984 | 0.034096857 | 0.094315574 |
| 226079_at   | 0.013863828  | 0.460078042 | 0.647163767 | 0.786004114 |
| 226080_at   | 0.221702795  | 4.162903703 | 0.000104453 | 0.00076428  |
| 226081_at   | 0.010056062  | 0.325251564 | 0.746149796 | 0.853153594 |
| 226082_s_at | 0.019989119  | 0.679807512 | 0.499304672 | 0.672077022 |
| 226083_at   | -0.206808076 | -4.94682473 | 6.69E-06    | 7.67E-05    |
| 226084_at   | 0.01755024   | 0.476337689 | 0.635606143 | 0.77785563  |
| 226085_at   | 0.115174262  | 1.500203318 | 0.138933709 | 0.278428112 |
| 226086_at   | -0.44084586  | -3.42130086 | 0.001141979 | 0.00568851  |
| 226087_at   | 0.014780564  | 0.364438558 | 0.716843121 | 0.834173034 |
| 226088_at   | 0.001675026  | 0.061442807 | 0.951215765 | 0.975105834 |

|             |             |             |             |             |
|-------------|-------------|-------------|-------------|-------------|
| 226089_at   | -0.10727418 | -2.3565624  | 0.021809997 | 0.066079071 |
| 226090_x_at | -0.09558967 | -2.69799189 | 0.009098687 | 0.032329347 |
| 226091_s_at | 0.052614116 | 1.032330709 | 0.306161487 | 0.486280801 |
| 226092_at   | 0.052806734 | 1.087733457 | 0.281169002 | 0.458379114 |
| 226093_at   | 0.230902651 | 6.402746722 | 2.83E-08    | 9.49E-07    |
| 226094_at   | -0.20975781 | -2.20485084 | 0.031405019 | 0.088318216 |
| 226095_s_at | 0.041654848 | 1.269811925 | 0.209173883 | 0.373547477 |
| 226096_at   | -0.18399506 | -3.92921396 | 0.000227543 | 0.001472115 |
| 226097_at   | -0.08941555 | -3.18351518 | 0.002330526 | 0.010364801 |
| 226098_at   | 0.227269574 | 2.501298753 | 0.015190356 | 0.049155557 |
| 226099_at   | 0.532614816 | 3.331510497 | 0.001500018 | 0.007164564 |
| 226100_at   | 0.391110178 | 5.011265943 | 5.30E-06    | 6.32E-05    |
| 226101_at   | -0.29853259 | -4.34544414 | 5.61E-05    | 0.000453904 |
| 226102_at   | 0.188369519 | 5.452335835 | 1.04E-06    | 1.65E-05    |
| 226103_at   | -0.1059692  | -2.91311746 | 0.005058437 | 0.019903492 |
| 226104_at   | 0.080172562 | 1.709474656 | 0.092657218 | 0.20542893  |
| 226105_at   | 0.112394507 | 2.61073046  | 0.01145513  | 0.038961389 |
| 226106_at   | 0.171243056 | 2.062708489 | 0.043584003 | 0.114531628 |
| 226107_at   | 0.129617143 | 2.05243867  | 0.044604686 | 0.116707021 |
| 226108_at   | -0.09479667 | -2.02518609 | 0.047414051 | 0.122352836 |
| 226109_at   | 0.599310833 | 4.647865248 | 1.95E-05    | 0.00018726  |
| 226110_at   | 0.437158081 | 6.151105161 | 7.43E-08    | 2.00E-06    |
| 226111_s_at | 0.137831667 | 2.88612905  | 0.005453076 | 0.021162634 |
| 226112_at   | 0.098501848 | 2.582274703 | 0.012336191 | 0.041381749 |
| 226113_at   | -0.17853007 | -3.93267906 | 0.000224967 | 0.001458189 |
| 226114_at   | -0.05734456 | -1.28067208 | 0.205357463 | 0.368558177 |
| 226115_at   | -0.0913944  | -1.37428586 | 0.174589368 | 0.328688994 |
| 226116_at   | 0.250196603 | 4.901838373 | 7.88E-06    | 8.76E-05    |
| 226117_at   | 0.006305535 | 0.06855121  | 0.945580369 | 0.971983023 |
| 226118_at   | 0.026395448 | 0.772731848 | 0.44278854  | 0.623023815 |
| 226119_at   | 0.14346919  | 2.033457647 | 0.046545658 | 0.12062035  |
| 226120_at   | -0.00325829 | -0.03520074 | 0.972039376 | 0.985844263 |
| 226121_at   | 0.003521179 | 0.11208795  | 0.911136963 | 0.952978153 |
| 226122_at   | 0.299743891 | 4.634890255 | 2.04E-05    | 0.000194793 |
| 226123_at   | 0.296930932 | 5.821361093 | 2.61E-07    | 5.34E-06    |
| 226124_at   | 0.138576316 | 3.969024579 | 0.000199579 | 0.001314543 |
| 226125_at   | 0.027778445 | 0.476249736 | 0.635668421 | 0.777889244 |
| 226126_at   | 0.078882179 | 1.250871254 | 0.215955596 | 0.381919493 |
| 226127_at   | -0.03451126 | -0.62646962 | 0.53344127  | 0.700286607 |
| 226128_at   | 0.206248758 | 2.987683538 | 0.004101544 | 0.016743352 |
| 226129_at   | -0.04593542 | -1.07208495 | 0.288079812 | 0.466228863 |
| 226130_at   | 0.08647369  | 2.309328326 | 0.024471245 | 0.072486007 |
| 226131_s_at | 0.071399807 | 1.704991857 | 0.093495572 | 0.206851495 |
| 226132_s_at | -0.35308966 | -5.73173384 | 3.66E-07    | 7.03E-06    |
| 226133_s_at | -0.11024625 | -3.46824613 | 0.000988672 | 0.005048644 |
| 226134_s_at | 0.457816564 | 4.913584877 | 7.55E-06    | 8.46E-05    |
| 226135_at   | -0.04064577 | -0.90231452 | 0.370585906 | 0.553846485 |
| 226136_at   | -0.1083145  | -2.08949058 | 0.041016901 | 0.109101734 |
| 226137_at   | 0.255314308 | 4.477436489 | 3.55E-05    | 0.000309839 |
| 226138_s_at | 0.023280738 | 0.529331373 | 0.598576354 | 0.750563224 |
| 226139_at   | 0.075961169 | 2.209733532 | 0.031045988 | 0.087506766 |
| 226140_s_at | 0.041754654 | 0.825974679 | 0.412170622 | 0.594466371 |
| 226141_at   | 0.044940957 | 1.249832737 | 0.216332081 | 0.382358356 |
| 226142_at   | -0.20271786 | -4.69367482 | 1.66E-05    | 0.000162983 |
| 226143_at   | -0.16014309 | -2.81410163 | 0.006650035 | 0.024945724 |
| 226144_at   | -0.23440725 | -3.90257614 | 0.000248322 | 0.00158475  |
| 226145_s_at | -0.98942641 | -6.39396047 | 2.92E-08    | 9.78E-07    |
| 226146_at   | 0.090336094 | 2.761953252 | 0.007663074 | 0.028048985 |
| 226147_s_at | -0.07314445 | -1.78781293 | 0.078979957 | 0.181787724 |
| 226148_at   | 0.011699746 | 0.195757796 | 0.845477367 | 0.91518297  |
| 226149_at   | 0.021194824 | 0.725947443 | 0.470762201 | 0.647289691 |
| 226150_at   | 0.075941717 | 1.130800962 | 0.262748387 | 0.437395273 |
| 226151_x_at | -0.13499155 | -2.32545955 | 0.023531568 | 0.070294287 |
| 226152_at   | -0.43611206 | -5.99274495 | 1.36E-07    | 3.21E-06    |
| 226153_s_at | 0.21266961  | 4.301407996 | 6.52E-05    | 0.000513839 |
| 226154_at   | -0.40762366 | -5.12535946 | 3.50E-06    | 4.49E-05    |
| 226155_at   | -0.16046449 | -2.77156004 | 0.007466396 | 0.027456755 |
| 226156_at   | 0.238771156 | 5.645190775 | 5.07E-07    | 9.15E-06    |
| 226157_at   | 0.09516482  | 2.178750637 | 0.033386818 | 0.092718802 |
| 226158_at   | 0.495452289 | 5.269393238 | 2.06E-06    | 2.91E-05    |
| 226159_at   | 0.199118583 | 4.166159317 | 0.000103311 | 0.00075766  |
| 226160_at   | 0.099559714 | 3.044747743 | 0.003486145 | 0.014600581 |
| 226161_at   | 0.020425419 | 0.40651838  | 0.68584348  | 0.812439483 |
| 226162_at   | -0.00706725 | -0.22461579 | 0.823060008 | 0.901778449 |
| 226163_at   | -0.04158279 | -1.53487114 | 0.130200476 | 0.26552223  |

|             |             |             |             |             |
|-------------|-------------|-------------|-------------|-------------|
| 226164_x_at | 0.333370892 | 4.3412      | 5.69E-05    | 0.000459166 |
| 226165_at   | 0.155630273 | 2.549413903 | 0.013429946 | 0.044394076 |
| 226166_x_at | 0.071301479 | 1.705506165 | 0.093399073 | 0.20671477  |
| 226167_at   | -0.35963774 | -5.58381653 | 6.39E-07    | 1.10E-05    |
| 226168_at   | 0.05955599  | 1.68776108  | 0.096776291 | 0.212296962 |
| 226169_at   | 0.224158083 | 3.658786006 | 0.000544897 | 0.003079869 |
| 226170_at   | 0.138006709 | 4.066848492 | 0.000144217 | 0.001001454 |
| 226171_at   | 0.259227671 | 5.075123963 | 4.20E-06    | 5.22E-05    |
| 226172_at   | -0.04751854 | -1.25008034 | 0.216242275 | 0.382260096 |
| 226173_at   | -0.14011819 | -4.0961405  | 0.000130754 | 0.000925361 |
| 226174_at   | -0.04415794 | -1.33455777 | 0.187186595 | 0.345178383 |
| 226175_at   | -0.14602312 | -4.45521428 | 3.84E-05    | 0.000331134 |
| 226176_s_at | 0.216592331 | 4.525578514 | 3.00E-05    | 0.000268373 |
| 226177_at   | 0.267742157 | 3.363963626 | 0.001359844 | 0.006595848 |
| 226178_at   | 0.172436339 | 3.601921804 | 0.00065207  | 0.003579255 |
| 226179_at   | -0.19706757 | -4.23175746 | 8.27E-05    | 0.000628248 |
| 226180_at   | 0.209328789 | 5.357406156 | 1.49E-06    | 2.21E-05    |
| 226181_at   | 0.076511009 | 1.051187001 | 0.297490837 | 0.476556883 |
| 226182_s_at | -0.06066962 | -1.82322022 | 0.073374792 | 0.171716301 |
| 226183_at   | -0.37505393 | -5.10074394 | 3.82E-06    | 4.84E-05    |
| 226184_at   | 0.3172383   | 4.471291615 | 3.63E-05    | 0.000315188 |
| 226185_at   | -0.34845073 | -4.68148277 | 1.73E-05    | 0.000169003 |
| 226186_at   | -0.41684519 | -6.09645782 | 9.15E-08    | 2.35E-06    |
| 226187_at   | -0.07634931 | -1.64866009 | 0.104571989 | 0.225258227 |
| 226188_at   | -0.37316396 | -6.58963445 | 1.37E-08    | 5.66E-07    |
| 226189_at   | 0.739957058 | 6.348341016 | 3.48E-08    | 1.12E-06    |
| 226190_at   | 0.212860851 | 4.230356789 | 8.31E-05    | 0.000630411 |
| 226191_at   | -0.36300601 | -4.39035985 | 4.80E-05    | 0.000397783 |
| 226192_at   | 0.129925194 | 3.057775514 | 0.003358289 | 0.014128651 |
| 226193_x_at | -0.42543801 | -4.76728638 | 1.28E-05    | 0.000130574 |
| 226194_at   | 0.059455698 | 1.506246271 | 0.137378958 | 0.276204076 |
| 226195_at   | 0.005879378 | 0.165771532 | 0.868907679 | 0.929037794 |
| 226196_s_at | 0.037883663 | 0.890149945 | 0.377027455 | 0.559711378 |
| 226197_at   | -0.01632921 | -0.34694502 | 0.729876209 | 0.842449058 |
| 226198_at   | 0.067635644 | 1.830283824 | 0.072297463 | 0.16980861  |
| 226199_at   | -0.14743791 | -2.74870804 | 0.007942055 | 0.028916199 |
| 226200_at   | 0.112405868 | 1.899983085 | 0.062362173 | 0.151600033 |
| 226201_at   | 0.045702362 | 1.204185523 | 0.233362071 | 0.402043779 |
| 226202_at   | -0.07724091 | -1.80417671 | 0.076346557 | 0.17699348  |
| 226203_at   | -0.32988192 | -5.61848437 | 5.61E-07    | 9.92E-06    |
| 226204_at   | -0.09167531 | -2.51190632 | 0.014785247 | 0.048004523 |
| 226205_at   | -0.04799982 | -1.05842142 | 0.294209361 | 0.472859523 |
| 226206_at   | 0.612332433 | 6.643872268 | 1.11E-08    | 4.84E-07    |
| 226207_at   | 0.131818237 | 3.910689375 | 0.000241807 | 0.001551149 |
| 226208_at   | -0.01886757 | -0.36088872 | 0.719481147 | 0.835832053 |
| 226209_at   | -0.09369527 | -2.58020642 | 0.012402571 | 0.041570098 |
| 226210_s_at | -0.17470521 | -1.28601665 | 0.203498469 | 0.366339869 |
| 226211_at   | -0.26423786 | -3.25624822 | 0.001879407 | 0.008661902 |
| 226212_s_at | 0.018365498 | 0.588495448 | 0.558462631 | 0.720228889 |
| 226213_at   | 0.408888376 | 3.80811698  | 0.000337726 | 0.002055448 |
| 226214_at   | -0.05887367 | -0.9871063  | 0.32765117  | 0.510044796 |
| 226215_s_at | -0.14011357 | -2.82772284 | 0.006406572 | 0.024184689 |
| 226216_at   | 0.117678898 | 2.096698479 | 0.04034886  | 0.107613013 |
| 226217_at   | 0.097921487 | 2.465364153 | 0.016638282 | 0.052974148 |
| 226218_at   | 0.037638497 | 1.183332529 | 0.241458523 | 0.41175459  |
| 226219_at   | 0.088393824 | 1.977877142 | 0.052653884 | 0.132814505 |
| 226220_at   | -0.01520628 | -0.43486756 | 0.665256803 | 0.79835753  |
| 226221_at   | -0.02549838 | -0.71041359 | 0.480267128 | 0.655612525 |
| 226222_at   | -0.00331582 | -0.09418095 | 0.925286895 | 0.96085822  |
| 226223_at   | 0.507366648 | 4.548934976 | 2.76E-05    | 0.000250584 |
| 226224_at   | -0.12048861 | -3.00616488 | 0.003891949 | 0.016032719 |
| 226225_at   | 0.452238865 | 4.565807352 | 2.61E-05    | 0.000238827 |
| 226226_at   | 0.065564631 | 2.159664646 | 0.034904697 | 0.096050779 |
| 226227_x_at | 0.032937035 | 0.504317374 | 0.615930502 | 0.763752456 |
| 226228_at   | 0.478549319 | 5.89665012  | 1.96E-07    | 4.27E-06    |
| 226229_s_at | 0.050323207 | 1.210743947 | 0.23085695  | 0.399035381 |
| 226230_at   | 0.086716497 | 1.755087878 | 0.084473912 | 0.191445642 |
| 226231_at   | 0.031529153 | 1.109984473 | 0.27154247  | 0.44745137  |
| 226232_at   | -0.11790379 | -2.27743684 | 0.026427631 | 0.077043575 |
| 226233_at   | 0.005801897 | 0.121003666 | 0.904102327 | 0.9491471   |
| 226234_at   | -0.11215794 | -3.50504128 | 0.000882392 | 0.004593576 |
| 226235_at   | -0.0996919  | -2.11390506 | 0.038792264 | 0.104289213 |
| 226236_at   | -0.09505565 | -1.3935414  | 0.168722152 | 0.320709868 |
| 226237_at   | 0.507650712 | 3.151714236 | 0.002558162 | 0.011215359 |
| 226238_at   | -0.08025614 | -1.4348424  | 0.156650797 | 0.303456175 |

|             |             |             |             |             |
|-------------|-------------|-------------|-------------|-------------|
| 226239_at   | 0.053014433 | 1.311284861 | 0.194879394 | 0.355071543 |
| 226240_at   | 0.035077917 | 1.109001555 | 0.271962765 | 0.447846716 |
| 226241_s_at | -0.04365499 | -0.88206573 | 0.381347254 | 0.564119272 |
| 226242_at   | 0.011490456 | 0.279437991 | 0.780893208 | 0.874766373 |
| 226243_at   | -0.09485243 | -1.88989455 | 0.063724356 | 0.15421101  |
| 226244_at   | 0.058385553 | 1.631168515 | 0.108221278 | 0.231159342 |
| 226245_at   | -0.81305773 | -8.1542307  | 3.16E-11    | 1.14E-08    |
| 226246_at   | -0.62600201 | -7.28784151 | 9.15E-10    | 8.87E-08    |
| 226247_at   | -0.20216106 | -2.80739586 | 0.006773001 | 0.02534106  |
| 226248_s_at | -0.28088927 | -6.03298351 | 1.17E-07    | 2.85E-06    |
| 226249_at   | 0.235813378 | 2.731397132 | 0.008320736 | 0.030046132 |
| 226250_at   | 0.391557803 | 6.340170779 | 3.60E-08    | 1.15E-06    |
| 226251_at   | 0.11976865  | 2.400268434 | 0.019580862 | 0.06054015  |
| 226252_at   | 0.736256951 | 8.028735087 | 5.14E-11    | 1.42E-08    |
| 226253_at   | 0.082552565 | 1.934688595 | 0.057863332 | 0.142921854 |
| 226254_s_at | 0.289755891 | 4.534883526 | 2.90E-05    | 0.000260942 |
| 226255_at   | 0.244779553 | 4.421316706 | 4.31E-05    | 0.000363979 |
| 226256_at   | 0.029730008 | 0.895621095 | 0.37412158  | 0.557229942 |
| 226257_x_at | -0.13873605 | -3.2779651  | 0.001761543 | 0.008197302 |
| 226258_at   | -0.31366653 | -5.98386084 | 1.41E-07    | 3.30E-06    |
| 226259_at   | -0.33032256 | -6.21177803 | 5.89E-08    | 1.67E-06    |
| 226260_x_at | -0.05417469 | -1.46025041 | 0.14956516  | 0.293611795 |
| 226261_at   | 0.054489424 | 2.35699312  | 0.021786967 | 0.066022723 |
| 226262_at   | -0.06886397 | -2.11579794 | 0.038624262 | 0.103942988 |
| 226263_at   | 0.117387066 | 2.7415143   | 0.008097456 | 0.029380748 |
| 226264_at   | -0.25792133 | -4.68825126 | 1.69E-05    | 0.000165459 |
| 226265_at   | 0.468533264 | 6.942395231 | 3.50E-09    | 2.16E-07    |
| 226266_at   | 0.002335891 | 0.051779713 | 0.958880427 | 0.978964872 |
| 226267_at   | 0.226988634 | 3.548508722 | 0.000770825 | 0.004108491 |
| 226268_at   | 0.046518025 | 0.672549717 | 0.503878753 | 0.675952251 |
| 226269_at   | -0.65288049 | -6.01000184 | 1.27E-07    | 3.05E-06    |
| 226270_at   | 0.05457071  | 1.142743019 | 0.257795374 | 0.431528929 |
| 226271_at   | -0.3886558  | -4.08525873 | 0.000135607 | 0.000952919 |
| 226272_at   | 0.035145102 | 0.489834706 | 0.626080757 | 0.770927158 |
| 226273_at   | 0.079900323 | 2.190559404 | 0.032476965 | 0.090740455 |
| 226274_at   | 0.048520574 | 1.353070581 | 0.18123325  | 0.337683156 |
| 226275_at   | 0.088400128 | 1.298763774 | 0.199115434 | 0.360628472 |
| 226276_at   | -0.29622229 | -2.71836494 | 0.008616673 | 0.030926465 |
| 226277_at   | -0.31783949 | -3.87585489 | 0.000270993 | 0.001704365 |
| 226278_at   | 0.039778206 | 0.677172807 | 0.500962523 | 0.673464124 |
| 226279_at   | -0.15050853 | -2.62057702 | 0.011163855 | 0.038127388 |
| 226280_at   | 0.276524745 | 4.506189127 | 3.21E-05    | 0.000283533 |
| 226281_at   | 0.404795383 | 3.658055773 | 0.00054616  | 0.003085446 |
| 226282_at   | 0.4108241   | 6.79861145  | 6.12E-09    | 3.18E-07    |
| 226283_at   | 0.313312461 | 3.463260487 | 0.001003975 | 0.005111604 |
| 226284_at   | 0.004535935 | 0.092539547 | 0.926585199 | 0.961547024 |
| 226285_at   | -0.30023884 | -4.56014156 | 2.66E-05    | 0.00024278  |
| 226286_at   | 0.059341163 | 2.011300776 | 0.048903232 | 0.12528422  |
| 226287_at   | -0.6656746  | -7.93019922 | 7.53E-11    | 1.80E-08    |
| 226288_s_at | -0.22286407 | -5.02572113 | 5.03E-06    | 6.05E-05    |
| 226289_at   | -0.41374445 | -5.56567443 | 6.84E-07    | 1.16E-05    |
| 226290_at   | -0.28010136 | -3.67921363 | 0.000510677 | 0.002917075 |
| 226291_at   | 0.035682757 | 1.061609234 | 0.292771325 | 0.471277051 |
| 226292_at   | 0.056117313 | 1.647132798 | 0.104886585 | 0.225744823 |
| 226293_at   | -0.1373598  | -3.58226458 | 0.000693588 | 0.003768276 |
| 226294_x_at | 0.134770995 | 2.539773703 | 0.013767094 | 0.045284388 |
| 226295_at   | 0.004406894 | 0.139801288 | 0.889296668 | 0.940719142 |
| 226296_s_at | -0.158179   | -3.63465977 | 0.000588135 | 0.003284795 |
| 226297_at   | 0.356188952 | 5.630585743 | 5.36E-07    | 9.58E-06    |
| 226298_at   | -0.42721765 | -6.09119273 | 9.34E-08    | 2.39E-06    |
| 226299_at   | 0.153587142 | 4.092879402 | 0.000132191 | 0.000933606 |
| 226300_at   | -0.06642159 | -1.77857806 | 0.08049928  | 0.1846097   |
| 226301_at   | 0.529590926 | 5.219143028 | 2.48E-06    | 3.38E-05    |
| 226302_at   | 0.057490358 | 1.880515113 | 0.065013327 | 0.156609477 |
| 226303_at   | 0.138074194 | 2.410256715 | 0.019101005 | 0.05938519  |
| 226304_at   | 0.287758177 | 5.743920645 | 3.50E-07    | 6.77E-06    |
| 226305_at   | -0.19618767 | -3.80814379 | 0.000337697 | 0.002055448 |
| 226306_at   | 0.259499018 | 4.439917761 | 4.04E-05    | 0.00034534  |
| 226307_at   | 0.065569541 | 2.531356085 | 0.014067735 | 0.046061453 |
| 226308_at   | -0.01038309 | -0.28830633 | 0.774130166 | 0.870747877 |
| 226309_at   | 0.042063279 | 0.889487261 | 0.377380392 | 0.560012102 |
| 226310_at   | 0.069879058 | 1.157351394 | 0.251827297 | 0.424688335 |
| 226311_at   | -0.05713087 | -1.97888236 | 0.052537583 | 0.132595983 |
| 226312_at   | 0.30165479  | 4.752822446 | 1.34E-05    | 0.000136429 |
| 226313_at   | -0.06257321 | -1.48541849 | 0.142796209 | 0.283991108 |

|             |             |             |             |             |
|-------------|-------------|-------------|-------------|-------------|
| 226314_at   | 0.20576018  | 4.890372748 | 8.21E-06    | 9.05E-05    |
| 226315_at   | 0.004314377 | 0.096409225 | 0.923524717 | 0.959931313 |
| 226316_at   | -0.07489324 | -1.17671194 | 0.244070999 | 0.415059804 |
| 226317_at   | 0.495373634 | 5.052437268 | 4.56E-06    | 5.60E-05    |
| 226318_at   | -0.19686188 | -3.98453089 | 0.000189608 | 0.001259134 |
| 226319_s_at | -0.06083776 | -0.80816141 | 0.422268252 | 0.604213764 |
| 226320_at   | 0.072053177 | 1.150047761 | 0.254798643 | 0.428019582 |
| 226321_at   | 0.153690356 | 2.783374115 | 0.007230897 | 0.026747495 |
| 226322_at   | -0.42779179 | -4.57984392 | 2.48E-05    | 0.000229355 |
| 226323_at   | 0.026848789 | 0.712276569 | 0.479121567 | 0.654548543 |
| 226324_s_at | 0.077238784 | 2.030698435 | 0.046833797 | 0.121214914 |
| 226325_at   | 0.099483334 | 1.351875855 | 0.181613046 | 0.338180144 |
| 226326_at   | 0.363934815 | 5.998958126 | 1.33E-07    | 3.16E-06    |
| 226327_at   | 0.135896183 | 2.791767541 | 0.007067759 | 0.026254866 |
| 226328_at   | -0.30722366 | -5.19024454 | 2.76E-06    | 3.68E-05    |
| 226329_s_at | 0.269057038 | 3.118519758 | 0.00281791  | 0.012187946 |
| 226330_s_at | 0.242548675 | 4.071301574 | 0.000142088 | 0.000990049 |
| 226331_at   | 0.234099117 | 4.151266209 | 0.000108636 | 0.000789972 |
| 226332_at   | -0.07016406 | -1.29603295 | 0.200048408 | 0.361862682 |
| 226333_at   | 0.414330185 | 5.033378205 | 4.89E-06    | 5.91E-05    |
| 226334_s_at | 0.416420218 | 3.854160701 | 0.00029085  | 0.001813934 |
| 226335_at   | -0.38723448 | -4.86983908 | 8.84E-06    | 9.63E-05    |
| 226336_at   | -0.21286975 | -2.74162941 | 0.008094948 | 0.029374748 |
| 226337_at   | 0.22753956  | 3.879047002 | 0.000268184 | 0.001690025 |
| 226338_at   | -0.07345099 | -1.41140149 | 0.163416906 | 0.313169604 |
| 226339_at   | -0.25301747 | -4.3723582  | 5.11E-05    | 0.000419328 |
| 226340_x_at | 0.20836427  | 4.252814785 | 7.70E-05    | 0.000592146 |
| 226341_at   | -0.19346144 | -3.73969096 | 0.000421001 | 0.002475059 |
| 226342_at   | 0.507034049 | 4.649361462 | 1.94E-05    | 0.000186311 |
| 226343_at   | -0.09897576 | -1.91717654 | 0.060097594 | 0.147236141 |
| 226344_at   | 0.458921959 | 4.986219622 | 5.80E-06    | 6.80E-05    |
| 226345_at   | 0.108206141 | 2.843181728 | 0.006140243 | 0.023362824 |
| 226346_at   | 0.053904309 | 1.581756698 | 0.119091071 | 0.248050433 |
| 226347_at   | 0.142611296 | 2.866216004 | 0.005762326 | 0.022153107 |
| 226348_at   | 0.069559977 | 2.356664591 | 0.021804531 | 0.066066989 |
| 226349_at   | -0.1090781  | -3.07186702 | 0.003224932 | 0.013651131 |
| 226350_at   | -0.15749754 | -2.00576032 | 0.049508582 | 0.126537662 |
| 226351_at   | -0.06028873 | -1.78329302 | 0.079720559 | 0.183162205 |
| 226352_at   | 0.072775324 | 1.178877099 | 0.243214398 | 0.414022163 |
| 226353_at   | 0.226755389 | 2.849485329 | 0.006034608 | 0.023011833 |
| 226354_at   | -0.11080561 | -2.84014461 | 0.006191746 | 0.02352274  |
| 226355_at   | -0.00468426 | -0.13761167 | 0.891019355 | 0.941696735 |
| 226356_at   | -0.01716321 | -0.41038807 | 0.683018805 | 0.810511296 |
| 226357_at   | 0.108021322 | 4.417897262 | 4.37E-05    | 0.000367403 |
| 226358_at   | 0.109506361 | 2.408692789 | 0.019175436 | 0.059575153 |
| 226359_at   | 0.100921172 | 2.68383294  | 0.009448088 | 0.033334961 |
| 226360_at   | 0.180162734 | 2.17230938  | 0.033892479 | 0.093854802 |
| 226361_at   | 0.09378849  | 1.879286234 | 0.06518383  | 0.156942938 |
| 226362_at   | 0.40352577  | 5.127828392 | 3.46E-06    | 4.46E-05    |
| 226363_at   | 0.117010894 | 2.024692975 | 0.04746626  | 0.12245806  |
| 226364_at   | 0.481101143 | 5.531942534 | 7.76E-07    | 1.30E-05    |
| 226365_at   | 0.371581856 | 3.361433431 | 0.001370311 | 0.006634378 |
| 226366_at   | 0.040039169 | 0.465004969 | 0.643652228 | 0.783498407 |
| 226367_at   | 0.043082844 | 1.047385364 | 0.299225251 | 0.47849488  |
| 226368_at   | -0.05473769 | -1.21306282 | 0.229975918 | 0.397897245 |
| 226369_at   | 0.112746572 | 3.526914371 | 0.000824458 | 0.004337965 |
| 226370_at   | -0.10852268 | -2.22298723 | 0.030089581 | 0.085327635 |
| 226371_at   | 0.075511399 | 1.986038849 | 0.051715949 | 0.130951229 |
| 226372_at   | -0.18220668 | -2.95189785 | 0.00453756  | 0.018218726 |
| 226373_at   | 0.137128479 | 3.845986253 | 0.000298688 | 0.001856093 |
| 226374_at   | -0.13526065 | -1.87514558 | 0.065761118 | 0.157993542 |
| 226375_at   | -0.42464187 | -5.20601974 | 2.60E-06    | 3.52E-05    |
| 226376_at   | 0.150023446 | 3.842232481 | 0.000302355 | 0.001876006 |
| 226377_at   | 0.451776739 | 8.574866375 | 6.22E-12    | 4.50E-09    |
| 226378_s_at | 0.218993323 | 5.386394595 | 1.33E-06    | 2.02E-05    |
| 226379_s_at | 0.037295041 | 1.215966097 | 0.228876308 | 0.396510271 |
| 226380_at   | 0.312127134 | 4.40921777  | 4.50E-05    | 0.000376503 |
| 226381_at   | -0.11841499 | -1.60616262 | 0.113617124 | 0.239566242 |
| 226382_at   | -1.05990463 | -9.21243671 | 5.42E-13    | 2.04E-09    |
| 226383_at   | -0.12689967 | -2.7104069  | 0.008802099 | 0.031437978 |
| 226384_at   | 0.229311398 | 3.501283311 | 0.000892727 | 0.004639813 |
| 226385_s_at | -0.01941011 | -0.29916601 | 0.765872448 | 0.865533086 |
| 226386_at   | -0.114846   | -1.42770041 | 0.158688822 | 0.306487503 |
| 226387_at   | 0.029086224 | 0.576429126 | 0.566534013 | 0.726654176 |
| 226388_at   | 0.115189581 | 2.502184514 | 0.015156149 | 0.049062625 |

|             |             |             |             |             |
|-------------|-------------|-------------|-------------|-------------|
| 226389_s_at | -0.18424694 | -3.24316167 | 0.001953978 | 0.008935557 |
| 226390_at   | -0.47143018 | -7.74228202 | 1.56E-10    | 2.79E-08    |
| 226391_at   | -0.31497649 | -6.75140389 | 7.35E-09    | 3.60E-07    |
| 226392_at   | 0.168557111 | 2.564264526 | 0.012925198 | 0.043000983 |
| 226393_at   | 0.06934023  | 2.150280815 | 0.035672898 | 0.097695518 |
| 226394_at   | -0.10645941 | -1.97782944 | 0.052659409 | 0.132820944 |
| 226395_at   | 0.066702653 | 1.004356082 | 0.319338713 | 0.500890094 |
| 226396_at   | 0.033514518 | 0.929153668 | 0.356623359 | 0.539759456 |
| 226397_s_at | -0.85066228 | -7.06726723 | 2.16E-09    | 1.54E-07    |
| 226398_s_at | -0.15433103 | -2.19901314 | 0.031839063 | 0.089319654 |
| 226399_at   | -0.43402821 | -5.20269797 | 2.63E-06    | 3.55E-05    |
| 226400_at   | -0.10747647 | -1.14027765 | 0.258812415 | 0.432823662 |
| 226401_at   | 0.060195805 | 1.782212438 | 0.07989847  | 0.183514361 |
| 226402_at   | 0.364574773 | 3.975100307 | 0.000195613 | 0.001293055 |
| 226403_at   | 0.023388737 | 0.755333983 | 0.453075691 | 0.632361849 |
| 226404_at   | -0.03902162 | -1.20932272 | 0.231398144 | 0.399660008 |
| 226405_s_at | -0.07475697 | -2.22970234 | 0.029614994 | 0.084247447 |
| 226406_at   | 0.157423282 | 1.682543628 | 0.097788117 | 0.213848426 |
| 226407_at   | 0.011953857 | 0.363469801 | 0.717562702 | 0.834649949 |
| 226408_at   | 0.100555288 | 2.36587818  | 0.021316706 | 0.064879203 |
| 226409_at   | 0.090331163 | 1.74609941  | 0.08603728  | 0.194259781 |
| 226410_at   | 0.053867997 | 1.354035426 | 0.180926973 | 0.337309706 |
| 226411_at   | -0.12374991 | -3.0807255  | 0.003143649 | 0.013358937 |
| 226412_at   | 0.102255674 | 2.775754766 | 0.007381983 | 0.027198317 |
| 226413_at   | 0.135952138 | 2.167690265 | 0.034259218 | 0.094665078 |
| 226414_s_at | 0.041221219 | 0.813094026 | 0.41945736  | 0.601675011 |
| 226415_at   | -1.03043781 | -6.86751503 | 4.68E-09    | 2.65E-07    |
| 226416_at   | 0.123934244 | 2.840048535 | 0.006193382 | 0.023526954 |
| 226417_at   | 0.081373223 | 2.225910459 | 0.029882165 | 0.084874085 |
| 226418_at   | -0.05543704 | -2.0371978  | 0.046157527 | 0.119885639 |
| 226419_s_at | -0.06475573 | -1.32436382 | 0.1905274   | 0.349378409 |
| 226420_at   | 0.147036283 | 2.722971089 | 0.008510991 | 0.030616    |
| 226421_at   | 0.02118522  | 0.639874847 | 0.524749308 | 0.693243322 |
| 226422_at   | 0.051978736 | 0.843925521 | 0.402144996 | 0.584381862 |
| 226423_at   | 0.299091649 | 4.566949015 | 2.60E-05    | 0.000238165 |
| 226424_at   | 0.489115266 | 4.1872067   | 9.62E-05    | 0.000712958 |
| 226425_at   | 0.007764292 | 0.100925385 | 0.919954412 | 0.957913436 |
| 226426_at   | 0.134428892 | 3.398301147 | 0.001225069 | 0.006041908 |
| 226427_s_at | 0.124813193 | 2.8121633   | 0.006685366 | 0.025055124 |
| 226428_at   | -0.06828677 | -1.73761532 | 0.087534844 | 0.1968653   |
| 226429_at   | -0.15615278 | -3.65431813 | 0.000552668 | 0.003116304 |
| 226430_at   | 0.557801315 | 5.294507104 | 1.88E-06    | 2.68E-05    |
| 226431_at   | -0.22901867 | -2.90225332 | 0.005214003 | 0.02038801  |
| 226432_at   | -0.31188441 | -2.95990936 | 0.004436361 | 0.017876645 |
| 226433_at   | -0.31829471 | -4.6106944  | 2.22E-05    | 0.000209025 |
| 226434_at   | 0.040991385 | 1.231627437 | 0.22301079  | 0.390139629 |
| 226435_at   | 0.765273154 | 6.258817799 | 4.91E-08    | 1.45E-06    |
| 226436_at   | 0.574360056 | 5.670132583 | 4.62E-07    | 8.48E-06    |
| 226437_at   | -0.01967739 | -0.2859881  | 0.775896385 | 0.871688093 |
| 226438_at   | 0.258027226 | 4.058228114 | 0.000148428 | 0.001025594 |
| 226439_s_at | -0.74959306 | -6.59692066 | 1.34E-08    | 5.55E-07    |
| 226440_at   | -0.03920238 | -0.65983986 | 0.511943229 | 0.682716913 |
| 226441_at   | 0.2770804   | 4.929280234 | 7.13E-06    | 8.10E-05    |
| 226442_at   | -0.21832981 | -3.23052951 | 0.002028596 | 0.009215877 |
| 226443_at   | -0.17372848 | -3.42579506 | 0.001126379 | 0.00562334  |
| 226444_at   | 0.274935718 | 4.696792046 | 1.64E-05    | 0.000161596 |
| 226445_s_at | 0.248562439 | 5.112532288 | 3.66E-06    | 4.68E-05    |
| 226446_at   | 0.361413283 | 5.392677737 | 1.30E-06    | 1.98E-05    |
| 226447_at   | 0.022237051 | 0.437871047 | 0.66309047  | 0.79665688  |
| 226448_at   | 0.10503853  | 1.751416135 | 0.085109668 | 0.192632497 |
| 226449_at   | 0.134586844 | 2.715810938 | 0.008675789 | 0.031083721 |
| 226450_at   | 0.135750554 | 3.420412529 | 0.001145086 | 0.005702718 |
| 226451_at   | -0.14839858 | -3.62998346 | 0.000596886 | 0.003322656 |
| 226452_at   | -0.06564276 | -0.77854632 | 0.439381286 | 0.619856584 |
| 226453_at   | 0.117554841 | 3.037626655 | 0.003557939 | 0.014837304 |
| 226454_at   | -0.19013394 | -5.58488762 | 6.36E-07    | 1.10E-05    |
| 226455_at   | 0.063372557 | 1.881299496 | 0.064904694 | 0.156432109 |
| 226456_at   | -0.18328775 | -4.33802406 | 5.75E-05    | 0.000463204 |
| 226457_at   | -0.17133867 | -3.2367906  | 0.001991283 | 0.009081062 |
| 226458_at   | -0.30270964 | -3.8634461  | 0.000282185 | 0.001767791 |
| 226459_at   | 0.109836951 | 1.657306831 | 0.10280538  | 0.222282439 |
| 226460_at   | 0.124709991 | 1.820451277 | 0.073800765 | 0.172478366 |
| 226461_at   | 0.05736167  | 2.25177463  | 0.02810125  | 0.080780926 |
| 226462_at   | -0.20333493 | -2.96439538 | 0.004380616 | 0.01768711  |
| 226463_at   | -0.33579109 | -3.66873866 | 0.000527959 | 0.003000453 |



|             |             |             |             |             |
|-------------|-------------|-------------|-------------|-------------|
| 226464_at   | 0.484333456 | 5.266809359 | 2.08E-06    | 2.92E-05    |
| 226465_s_at | 0.307551157 | 5.981061793 | 1.42E-07    | 3.32E-06    |
| 226466_s_at | 0.159278246 | 2.891489004 | 0.005372501 | 0.020906209 |
| 226467_at   | -0.07659246 | -2.61779938 | 0.01124533  | 0.038361675 |
| 226468_at   | 0.020755579 | 0.646208541 | 0.52066856  | 0.689657073 |
| 226469_s_at | -0.10878153 | -2.15056051 | 0.035649788 | 0.097662152 |
| 226470_at   | -0.16244249 | -3.90840155 | 0.000243628 | 0.001560465 |
| 226471_at   | -0.2259309  | -4.77875202 | 1.23E-05    | 0.000126171 |
| 226472_at   | 0.210397162 | 2.714640599 | 0.008703002 | 0.031158739 |
| 226473_at   | 0.023672832 | 0.77350209  | 0.442336293 | 0.62266193  |
| 226474_at   | 0.135780542 | 2.536101916 | 0.013897512 | 0.045622711 |
| 226475_at   | -0.06353714 | -0.82331289 | 0.413670087 | 0.595898261 |
| 226476_s_at | 0.047460444 | 1.3289937   | 0.189004534 | 0.347441208 |
| 226477_at   | 0.031832507 | 0.955123783 | 0.343440991 | 0.526373964 |
| 226478_at   | 0.009764273 | 0.15725184  | 0.875587256 | 0.933232505 |
| 226479_at   | -0.24177529 | -2.90085547 | 0.005234338 | 0.020452266 |
| 226480_at   | 0.288418402 | 5.581403453 | 6.44E-07    | 1.11E-05    |
| 226481_at   | 0.104790725 | 3.325349694 | 0.001528126 | 0.007273165 |
| 226482_s_at | -0.43134734 | -4.9135716  | 7.55E-06    | 8.46E-05    |
| 226483_at   | -0.08200179 | -2.36044372 | 0.021603248 | 0.065563788 |
| 226484_at   | 0.182684349 | 3.289009364 | 0.00170431  | 0.007972476 |
| 226485_at   | 0.151492798 | 3.104617402 | 0.002933871 | 0.012595636 |
| 226486_at   | -0.04326117 | -1.15587955 | 0.252424086 | 0.425405831 |
| 226487_at   | 0.03947052  | 0.536283942 | 0.593793521 | 0.74699713  |
| 226488_at   | 0.129312969 | 3.79235991  | 0.000355373 | 0.002143941 |
| 226489_at   | 0.086777382 | 1.425318119 | 0.159373188 | 0.307463805 |
| 226490_at   | 0.442573105 | 4.933740602 | 7.02E-06    | 8.00E-05    |
| 226491_x_at | 0.000429994 | 0.012708455 | 0.989903586 | 0.995292937 |
| 226492_at   | -0.07027664 | -0.74488233 | 0.459321617 | 0.637872156 |
| 226493_at   | 0.21618577  | 3.47771212  | 0.000960224 | 0.004930416 |
| 226494_at   | -0.1733063  | -3.83475299 | 0.000309792 | 0.001912322 |
| 226495_at   | 0.194066157 | 4.307836158 | 6.38E-05    | 0.000504155 |
| 226496_at   | 0.047221912 | 0.924594795 | 0.358970755 | 0.5420889   |
| 226497_s_at | 0.110070424 | 1.018583426 | 0.312590157 | 0.493562243 |
| 226498_at   | 0.167434805 | 0.960161842 | 0.340921126 | 0.523823253 |
| 226499_at   | 0.043640062 | 1.335951369 | 0.186733348 | 0.344668298 |
| 226500_at   | 0.181523828 | 4.061929896 | 0.000146605 | 0.001015455 |
| 226501_at   | 0.321045401 | 5.370074168 | 1.42E-06    | 2.13E-05    |
| 226502_at   | 0.088312863 | 2.169391235 | 0.034123765 | 0.094378322 |
| 226503_at   | 0.082892634 | 1.258532619 | 0.213193129 | 0.378507554 |
| 226504_at   | 0.068878668 | 1.792893135 | 0.078154411 | 0.180258913 |
| 226505_x_at | -0.08429526 | -0.92876818 | 0.356821466 | 0.539904302 |
| 226506_at   | 0.082211652 | 1.821631585 | 0.073618934 | 0.172171457 |
| 226507_at   | -0.31451544 | -4.86083281 | 9.13E-06    | 9.90E-05    |
| 226508_at   | 0.170843176 | 2.823747921 | 0.006476756 | 0.024402222 |
| 226509_at   | 0.151894366 | 4.051835069 | 0.000151627 | 0.001042719 |
| 226510_at   | 0.317664193 | 4.176758079 | 9.97E-05    | 0.000734741 |
| 226511_at   | -0.15241199 | -4.23063519 | 8.30E-05    | 0.000630028 |
| 226512_at   | -0.04100886 | -1.16965589 | 0.246877653 | 0.418581065 |
| 226513_at   | 0.015573913 | 0.355869976 | 0.723216628 | 0.83814794  |
| 226514_at   | 0.030076867 | 1.079313086 | 0.284873196 | 0.462511457 |
| 226515_at   | -0.05287852 | -1.29463784 | 0.200526303 | 0.362551945 |
| 226516_at   | -0.04544276 | -1.92573822 | 0.058996254 | 0.145030834 |
| 226517_at   | -0.40428315 | -3.44423088 | 0.001064478 | 0.005367062 |
| 226518_at   | 0.037790078 | 0.89094146  | 0.376606179 | 0.559364685 |
| 226519_s_at | 0.183584089 | 3.005656052 | 0.003897583 | 0.016050012 |
| 226520_at   | 0.367754402 | 4.624241411 | 2.12E-05    | 0.0002008   |
| 226521_s_at | 0.018154777 | 0.484784265 | 0.629637683 | 0.773708203 |
| 226522_at   | 0.118852412 | 2.597375335 | 0.011861249 | 0.040080368 |
| 226523_at   | 0.0122379   | 0.424698598 | 0.672612616 | 0.803002619 |
| 226524_at   | -0.08322407 | -1.8664537  | 0.066987004 | 0.160292509 |
| 226525_at   | 0.171166114 | 2.685920309 | 0.009395818 | 0.033195091 |
| 226526_s_at | 0.003045851 | 0.086788724 | 0.931135501 | 0.964116894 |
| 226527_at   | -0.03378905 | -0.73737816 | 0.463836471 | 0.641629923 |
| 226528_at   | -0.28930866 | -4.44856318 | 3.92E-05    | 0.000337056 |
| 226529_at   | 0.029047503 | 0.469866895 | 0.640194999 | 0.781331957 |
| 226530_at   | -0.03873066 | -1.43860942 | 0.155584079 | 0.302041359 |
| 226531_at   | 0.05375397  | 1.766295671 | 0.082557637 | 0.188008453 |
| 226532_at   | 0.245144521 | 4.378044722 | 5.01E-05    | 0.000412392 |
| 226533_at   | 0.048738391 | 1.514936608 | 0.135167245 | 0.272911431 |
| 226534_at   | 0.116748363 | 1.677471843 | 0.098779989 | 0.215537619 |
| 226535_at   | -0.0343419  | -1.02899095 | 0.30771494  | 0.48810634  |
| 226536_at   | -0.06511227 | -1.94986155 | 0.055985136 | 0.139361017 |
| 226537_at   | 0.00936025  | 0.21512195  | 0.83041961  | 0.906070794 |
| 226538_at   | 0.467556235 | 4.089076696 | 0.000133885 | 0.000942594 |

|             |             |             |             |             |
|-------------|-------------|-------------|-------------|-------------|
| 226539_s_at | -0.04440715 | -0.61377197 | 0.541742758 | 0.706800869 |
| 226540_at   | 0.151935659 | 2.946800854 | 0.004603056 | 0.018425416 |
| 226541_at   | 0.23434218  | 3.326473345 | 0.001522963 | 0.007252521 |
| 226542_at   | 0.182892878 | 3.631279469 | 0.000594449 | 0.00331178  |
| 226543_at   | -0.01465602 | -0.38642997 | 0.700578665 | 0.823066211 |
| 226544_x_at | 0.260808506 | 5.496946234 | 8.84E-07    | 1.45E-05    |
| 226545_at   | 0.792692549 | 5.044838899 | 4.69E-06    | 5.72E-05    |
| 226546_at   | 0.105809615 | 1.561042966 | 0.123901489 | 0.255740456 |
| 226547_at   | 0.58645696  | 9.638822292 | 1.08E-13    | 9.65E-10    |
| 226548_at   | -0.06297356 | -1.86398319 | 0.067338941 | 0.160970901 |
| 226549_at   | -0.00578674 | -0.21277146 | 0.832244088 | 0.907280602 |
| 226550_at   | -0.99608242 | -6.2418091  | 5.25E-08    | 1.52E-06    |
| 226551_at   | 0.07711038  | 2.402822503 | 0.019457142 | 0.060286924 |
| 226552_at   | 0.013047395 | 0.299845796 | 0.765356434 | 0.865190585 |
| 226553_at   | 0.023008243 | 0.71325732  | 0.478519109 | 0.654045385 |
| 226554_at   | -0.12803949 | -2.44893223 | 0.017340889 | 0.054853733 |
| 226555_at   | 0.134500996 | 3.545171643 | 0.00077889  | 0.004143573 |
| 226556_at   | -0.03968616 | -0.64112262 | 0.523944052 | 0.692558859 |
| 226557_at   | -0.06782698 | -1.82957798 | 0.072404517 | 0.169979653 |
| 226558_at   | -0.04007238 | -0.29060589 | 0.772379349 | 0.869777921 |
| 226559_at   | 0.077960256 | 1.689213777 | 0.096496101 | 0.211892321 |
| 226560_at   | -0.51584297 | -6.70400861 | 8.83E-09    | 4.10E-07    |
| 226561_at   | -0.24290741 | -3.45116015 | 0.001042057 | 0.005274845 |
| 226562_at   | 0.193887991 | 4.448647421 | 3.92E-05    | 0.000337022 |
| 226563_at   | 0.312021435 | 6.251147513 | 5.06E-08    | 1.48E-06    |
| 226564_at   | 0.004168546 | 0.135569497 | 0.892626513 | 0.942525696 |
| 226565_at   | 0.004293929 | 0.107321157 | 0.914901005 | 0.954765438 |
| 226566_at   | -0.16641554 | -3.69177604 | 0.000490664 | 0.002819331 |
| 226567_at   | -0.17926236 | -2.95787915 | 0.004461806 | 0.017967835 |
| 226568_at   | -0.23370473 | -2.76028649 | 0.007697678 | 0.028158089 |
| 226569_s_at | -0.0080696  | -0.22413314 | 0.82343378  | 0.901894483 |
| 226570_at   | 0.004663165 | 0.172187578 | 0.863883694 | 0.926178815 |
| 226571_s_at | 0.118670033 | 2.558741559 | 0.013110869 | 0.043504028 |
| 226572_at   | -0.11160218 | -1.9510296  | 0.055842732 | 0.139130527 |
| 226573_at   | -0.4407393  | -4.85303799 | 9.39E-06    | 0.0001014   |
| 226574_at   | -0.03572293 | -0.50720491 | 0.613915648 | 0.762057498 |
| 226575_at   | 0.188229427 | 3.788315307 | 0.000360043 | 0.002166852 |
| 226576_at   | -0.5552766  | -5.42205283 | 1.17E-06    | 1.81E-05    |
| 226577_at   | 0.121028719 | 1.948519063 | 0.056149191 | 0.13966826  |
| 226578_s_at | -0.01229653 | -0.27519561 | 0.784134527 | 0.876766294 |
| 226579_at   | 0.257194393 | 7.033507173 | 2.46E-09    | 1.68E-07    |
| 226580_at   | -0.19827009 | -2.85108561 | 0.006008059 | 0.022930813 |
| 226581_at   | 0.031804964 | 0.516142478 | 0.607698213 | 0.757326656 |
| 226582_at   | 0.06838216  | 1.599605788 | 0.115067387 | 0.241924621 |
| 226583_at   | -0.08603653 | -1.16453462 | 0.248929194 | 0.421295245 |
| 226584_s_at | -0.0897659  | -2.95122974 | 0.004546096 | 0.018249718 |
| 226585_at   | 0.016867494 | 0.292107961 | 0.77123636  | 0.869023911 |
| 226586_at   | 0.212641902 | 6.354693565 | 3.40E-08    | 1.10E-06    |
| 226587_at   | -0.3148058  | -3.65720403 | 0.000547636 | 0.003093006 |
| 226588_at   | 0.064591702 | 1.54098129  | 0.128707538 | 0.263210273 |
| 226589_at   | 0.182532071 | 4.15670201  | 0.000106663 | 0.000777771 |
| 226590_at   | 0.028059394 | 1.104926881 | 0.273709964 | 0.449911572 |
| 226591_at   | -0.87901728 | -6.40617532 | 2.79E-08    | 9.41E-07    |
| 226592_at   | 0.09300741  | 3.126444318 | 0.002753746 | 0.011949743 |
| 226594_at   | 0.179228204 | 2.920256921 | 0.004958562 | 0.019589481 |
| 226595_at   | -0.04991487 | -1.72274412 | 0.090211841 | 0.201285451 |
| 226596_x_at | -0.1146488  | -2.28965478 | 0.025662307 | 0.075246019 |
| 226597_at   | -0.07663221 | -2.30750985 | 0.02457924  | 0.072728772 |
| 226598_s_at | -0.03414704 | -0.9948929  | 0.323881226 | 0.505904128 |
| 226599_at   | -0.22789253 | -5.08760517 | 4.01E-06    | 5.03E-05    |
| 226600_at   | -0.01349057 | -0.27604368 | 0.783486267 | 0.876243544 |
| 226601_at   | 0.038773672 | 1.135668959 | 0.260721288 | 0.435009176 |
| 226602_s_at | -0.3214006  | -3.69925575 | 0.000479107 | 0.002762512 |
| 226603_at   | 0.128554932 | 1.977160822 | 0.052736895 | 0.132926957 |
| 226604_at   | 0.151602762 | 2.279400329 | 0.026303291 | 0.076762876 |
| 226605_at   | -0.10413245 | -1.75684239 | 0.084171516 | 0.190944287 |
| 226606_s_at | 0.002998659 | 0.061580548 | 0.951106542 | 0.975039651 |
| 226607_at   | 0.06694171  | 1.378990659 | 0.173141571 | 0.326671055 |
| 226608_at   | -0.16565026 | -3.24830555 | 0.001924341 | 0.008821687 |
| 226609_at   | 0.173626445 | 4.264946489 | 7.39E-05    | 0.000571784 |
| 226610_at   | -0.16665693 | -3.12490526 | 0.002766099 | 0.011999134 |
| 226611_s_at | -0.37170329 | -4.72072625 | 1.51E-05    | 0.000150492 |
| 226612_at   | -0.54976713 | -4.5585102  | 2.67E-05    | 0.000243725 |
| 226613_at   | 0.030079903 | 0.521527958 | 0.603965758 | 0.754547777 |
| 226614_s_at | 0.461111823 | 7.061681343 | 2.20E-09    | 1.56E-07    |

|             |             |             |             |             |
|-------------|-------------|-------------|-------------|-------------|
| 226615_at   | -0.2210831  | -3.24892959 | 0.001920774 | 0.008808951 |
| 226616_s_at | -0.12598861 | -1.98978893 | 0.051289824 | 0.130049065 |
| 226617_at   | -0.37703436 | -4.34351735 | 5.64E-05    | 0.000456246 |
| 226618_at   | -0.49335205 | -3.96949223 | 0.000199271 | 0.001313347 |
| 226619_at   | 0.04055959  | 1.180804818 | 0.242453561 | 0.413057392 |
| 226620_x_at | 0.178074833 | 4.010999527 | 0.000173688 | 0.001169929 |
| 226621_at   | 0.480907245 | 3.562771072 | 0.000737241 | 0.003965911 |
| 226622_at   | -0.03211876 | -0.85727437 | 0.394787749 | 0.577426825 |
| 226623_at   | 0.190307927 | 2.539724491 | 0.013768835 | 0.04528678  |
| 226624_at   | 0.102147213 | 3.427176842 | 0.001121624 | 0.005605234 |
| 226625_at   | 0.677268451 | 6.996528102 | 2.84E-09    | 1.84E-07    |
| 226626_at   | 0.154027956 | 3.178702605 | 0.002363709 | 0.010488371 |
| 226627_at   | -0.0736578  | -1.32433387 | 0.190537282 | 0.349382193 |
| 226628_at   | 0.230923462 | 4.781998943 | 1.21E-05    | 0.000125119 |
| 226629_at   | 0.080985686 | 2.355400684 | 0.021872222 | 0.066246578 |
| 226630_at   | -0.09210259 | -1.95043888 | 0.055914712 | 0.139255521 |
| 226631_at   | -0.20593751 | -2.87984743 | 0.00554893  | 0.021471238 |
| 226632_at   | -0.09407841 | -1.47439548 | 0.145730571 | 0.288185429 |
| 226633_at   | 0.0528156   | 0.946558479 | 0.347753002 | 0.530762146 |
| 226634_at   | -0.20469129 | -3.86782271 | 0.000278188 | 0.001745931 |
| 226635_at   | -0.13903058 | -1.77668445 | 0.080813807 | 0.185093562 |
| 226636_at   | 0.187843014 | 2.918436196 | 0.004983857 | 0.019669169 |
| 226637_at   | 0.051401113 | 1.868947261 | 0.066633358 | 0.159640821 |
| 226638_at   | 0.224493643 | 4.074031299 | 0.000140797 | 0.000982743 |
| 226639_at   | 0.084282631 | 2.349864659 | 0.022170927 | 0.066945685 |
| 226640_at   | -0.06135629 | -1.49452222 | 0.140408005 | 0.280627635 |
| 226641_at   | 0.534577748 | 5.585433709 | 6.35E-07    | 1.10E-05    |
| 226642_s_at | 0.079813203 | 0.894234534 | 0.374856672 | 0.558045847 |
| 226643_s_at | 0.05009255  | 1.319771162 | 0.192047158 | 0.351501827 |
| 226644_at   | -0.48421121 | -6.8975305  | 4.17E-09    | 2.43E-07    |
| 226645_at   | -0.01362119 | -0.33364325 | 0.739840424 | 0.849062146 |
| 226646_at   | -0.06302986 | -1.84474171 | 0.070133764 | 0.165930025 |
| 226647_at   | -0.39333413 | -5.92938134 | 1.73E-07    | 3.86E-06    |
| 226648_at   | -0.09611869 | -2.26400813 | 0.027292067 | 0.078906524 |
| 226649_at   | 0.017190509 | 0.434666199 | 0.665402142 | 0.798421243 |
| 226650_at   | -0.1795721  | -2.39629126 | 0.01977492  | 0.061030366 |
| 226651_at   | -0.71886234 | -6.5439583  | 1.64E-08    | 6.42E-07    |
| 226652_at   | 0.101086576 | 2.774728238 | 0.007402559 | 0.027260643 |
| 226653_at   | -0.26163034 | -4.51504598 | 3.11E-05    | 0.000276585 |
| 226654_at   | -0.01233601 | -0.27845667 | 0.781642621 | 0.875189077 |
| 226655_at   | -0.02259363 | -0.51759179 | 0.606692719 | 0.75645327  |
| 226656_at   | 0.506882428 | 8.921510888 | 1.64E-12    | 2.83E-09    |
| 226657_at   | 0.000399949 | 0.00949237  | 0.992458559 | 0.996651041 |
| 226658_at   | 0.016359072 | 0.251935083 | 0.801973247 | 0.888271568 |
| 226659_at   | 0.058094477 | 1.328842278 | 0.189054194 | 0.347518202 |
| 226660_at   | 0.060066508 | 0.963466056 | 0.339275082 | 0.522155789 |
| 226661_at   | -0.05585662 | -1.94726757 | 0.056302495 | 0.140001031 |
| 226662_at   | -0.03528903 | -0.95233891 | 0.344839114 | 0.527738578 |
| 226663_at   | 0.241080188 | 2.712615769 | 0.008750268 | 0.031287862 |
| 226664_at   | -0.03630348 | -0.95261958 | 0.344698036 | 0.527609102 |
| 226665_at   | 0.15827603  | 1.698488917 | 0.094722811 | 0.208868752 |
| 226666_at   | 0.584542647 | 6.463271875 | 2.24E-08    | 8.02E-07    |
| 226667_x_at | -0.11155888 | -2.86209307 | 0.005828349 | 0.022356927 |
| 226668_at   | -0.0860158  | -1.2521343  | 0.215498365 | 0.381401625 |
| 226669_at   | 0.013792965 | 0.371568323 | 0.711555193 | 0.830438833 |
| 226670_s_at | 0.029579001 | 0.822725822 | 0.414001242 | 0.596224782 |
| 226671_at   | 0.254093582 | 2.586286879 | 0.012208343 | 0.041051698 |
| 226672_s_at | -0.04065863 | -1.58370398 | 0.118646675 | 0.247489473 |
| 226673_at   | 0.156803135 | 3.363586928 | 0.001361398 | 0.006601951 |
| 226674_at   | 0.03204262  | 0.631641966 | 0.530078691 | 0.697388191 |
| 226675_s_at | 0.406000988 | 2.854864929 | 0.005945788 | 0.022733265 |
| 226676_at   | 0.368902686 | 5.41235865  | 1.21E-06    | 1.86E-05    |
| 226677_at   | 0.324134358 | 4.839963865 | 9.84E-06    | 0.000105359 |
| 226678_at   | 0.051772862 | 1.716360307 | 0.091381558 | 0.20329656  |
| 226679_at   | 0.053082165 | 1.066198017 | 0.290709816 | 0.469073691 |
| 226680_at   | 0.280240899 | 4.584224328 | 2.44E-05    | 0.000226036 |
| 226681_at   | 0.02000367  | 0.596314741 | 0.55326295  | 0.715745827 |
| 226682_at   | -0.04550241 | -0.5697569  | 0.571021702 | 0.729458393 |
| 226683_at   | 0.37968531  | 3.961030197 | 0.000204914 | 0.001343411 |
| 226684_at   | -0.19729754 | -3.17356919 | 0.002399592 | 0.010611773 |
| 226685_at   | -0.00095706 | -0.01247931 | 0.990085626 | 0.995332094 |
| 226686_at   | -0.00995604 | -0.23958042 | 0.811492057 | 0.894338208 |
| 226687_at   | -0.02897751 | -0.84931853 | 0.399162523 | 0.581480225 |
| 226688_at   | -0.27402779 | -4.79775057 | 1.14E-05    | 0.00011934  |
| 226689_at   | -0.0554655  | -1.32442049 | 0.190508703 | 0.349358458 |

|             |             |             |             |             |
|-------------|-------------|-------------|-------------|-------------|
| 226690_at   | 0.656024849 | 7.959471948 | 6.72E-11    | 1.70E-08    |
| 226691_at   | 0.00319633  | 0.086765152 | 0.931154157 | 0.964116894 |
| 226692_at   | 0.21522556  | 4.724278737 | 1.49E-05    | 0.000148835 |
| 226693_at   | 0.140434463 | 2.674422803 | 0.009687047 | 0.034011587 |
| 226694_at   | 0.484653104 | 5.455612944 | 1.03E-06    | 1.64E-05    |
| 226695_at   | 0.471078359 | 4.809558285 | 1.10E-05    | 0.00011526  |
| 226696_at   | -0.00935444 | -0.30231317 | 0.763484391 | 0.863948459 |
| 226697_at   | 0.175982236 | 4.516054569 | 3.10E-05    | 0.000275886 |
| 226698_at   | 0.132764387 | 3.488522869 | 0.000928686 | 0.004793222 |
| 226699_at   | 0.030975399 | 1.150974102 | 0.2544204   | 0.427641375 |
| 226700_at   | -0.02492389 | -0.74183487 | 0.461152056 | 0.639422906 |
| 226701_at   | -0.05788312 | -1.60730761 | 0.113365394 | 0.239167589 |
| 226702_at   | -0.5756943  | -7.79050774 | 1.30E-10    | 2.48E-08    |
| 226703_at   | -0.07020965 | -1.92690937 | 0.058846945 | 0.144695625 |
| 226704_at   | -0.01197378 | -0.27710826 | 0.782672721 | 0.875774135 |
| 226705_at   | 0.183839762 | 3.699888443 | 0.000478141 | 0.002758368 |
| 226706_at   | -0.16144067 | -3.07928611 | 0.003156724 | 0.013404306 |
| 226707_at   | 0.053159719 | 1.131037545 | 0.262649613 | 0.437263419 |
| 226708_at   | 0.04927383  | 1.268566122 | 0.209615024 | 0.374125985 |
| 226709_at   | -0.32646128 | -5.19722734 | 2.69E-06    | 3.61E-05    |
| 226710_at   | 0.005628079 | 0.138068903 | 0.890659581 | 0.941492419 |
| 226711_at   | 0.32798975  | 3.561239594 | 0.00074078  | 0.003980154 |
| 226712_at   | 0.024182112 | 0.630930453 | 0.530540595 | 0.697734209 |
| 226713_at   | 0.242654448 | 3.510819189 | 0.000866723 | 0.004523598 |
| 226714_at   | 0.062488431 | 2.096478874 | 0.040369073 | 0.107647649 |
| 226715_at   | 0.067694893 | 1.301904999 | 0.198046286 | 0.359143219 |
| 226716_at   | -0.06541216 | -1.13723091 | 0.260073227 | 0.434138596 |
| 226717_at   | 0.114732637 | 2.786295157 | 0.007173733 | 0.02657663  |
| 226718_at   | -0.2444618  | -4.81162675 | 1.09E-05    | 0.000114571 |
| 226719_at   | 0.035201327 | 1.150637449 | 0.254557816 | 0.427803515 |
| 226720_at   | 0.181079738 | 4.216679138 | 8.71E-05    | 0.000655619 |
| 226721_at   | 0.273852119 | 4.556878994 | 2.69E-05    | 0.000244925 |
| 226722_at   | 0.156769741 | 2.008599639 | 0.049197557 | 0.125865089 |
| 226723_at   | 0.157177542 | 3.970071599 | 0.00019889  | 0.001311223 |
| 226724_s_at | -0.05902766 | -1.88092434 | 0.064956632 | 0.156515085 |
| 226725_at   | 0.077492755 | 2.02939141  | 0.046970823 | 0.121466717 |
| 226726_at   | 0.028136556 | 0.529725525 | 0.59830473  | 0.750412117 |
| 226727_at   | -0.07043277 | -2.44057952 | 0.017708174 | 0.055800164 |
| 226728_at   | 0.263604821 | 5.468571176 | 9.83E-07    | 1.57E-05    |
| 226729_at   | 0.142300385 | 4.068940081 | 0.000143213 | 0.000996029 |
| 226730_s_at | 0.014777958 | 0.30878501  | 0.758580837 | 0.86112413  |
| 226731_at   | 0.214201764 | 3.682580962 | 0.000505238 | 0.002890805 |
| 226732_at   | 0.046648699 | 0.745862043 | 0.458734045 | 0.637353249 |
| 226733_at   | 0.295965476 | 2.316290781 | 0.024061651 | 0.07151924  |
| 226734_at   | -0.17785336 | -2.3807705  | 0.020548805 | 0.0629191   |
| 226735_at   | 0.012404394 | 0.289272567 | 0.773394356 | 0.870292591 |
| 226736_at   | -0.0015461  | -0.01394643 | 0.988920121 | 0.994841265 |
| 226737_at   | 0.013208947 | 0.449365266 | 0.654826797 | 0.790845198 |
| 226738_at   | 0.077073959 | 3.113649203 | 0.002858039 | 0.012330482 |
| 226739_at   | 0.293815371 | 7.145373944 | 1.59E-09    | 1.26E-07    |
| 226740_x_at | 0.236041751 | 4.613982555 | 2.20E-05    | 0.00020693  |
| 226741_at   | -0.09209902 | -2.04508958 | 0.045347726 | 0.118180685 |
| 226742_at   | 0.183506793 | 2.908378628 | 0.005125757 | 0.020112408 |
| 226743_at   | 0.081062603 | 1.583178156 | 0.118766543 | 0.247636454 |
| 226744_at   | 0.296505863 | 8.49659853  | 8.41E-12    | 5.15E-09    |
| 226745_at   | 0.048737605 | 0.992718377 | 0.324931109 | 0.5071078   |
| 226746_s_at | -0.02939981 | -0.92299675 | 0.359795951 | 0.542932727 |
| 226747_at   | -0.3151052  | -3.38780723 | 0.001264853 | 0.006201736 |
| 226748_at   | -0.43835139 | -5.45172174 | 1.05E-06    | 1.66E-05    |
| 226749_at   | -0.05265371 | -0.85187826 | 0.397751719 | 0.580053508 |
| 226750_at   | 0.007864647 | 0.202279976 | 0.840398889 | 0.912182323 |
| 226751_at   | -0.05640608 | -0.89364128 | 0.375171468 | 0.558309912 |
| 226752_at   | -0.20525088 | -2.3669259  | 0.021261855 | 0.064743123 |
| 226753_at   | 0.243705663 | 4.176683108 | 9.97E-05    | 0.000734806 |
| 226754_at   | 0.10006034  | 2.104711691 | 0.039617309 | 0.106076773 |
| 226755_at   | -0.01599823 | -0.52387081 | 0.602345326 | 0.753386805 |
| 226756_at   | 0.243035525 | 2.916724454 | 0.005007747 | 0.019741223 |
| 226757_at   | 0.337154013 | 3.064725529 | 0.003291885 | 0.013893753 |
| 226758_at   | 0.051764772 | 1.049600987 | 0.298213582 | 0.477321159 |
| 226759_at   | 0.155215553 | 3.83861882  | 0.000305927 | 0.001894008 |
| 226760_at   | 0.072283994 | 0.875173831 | 0.385054446 | 0.567701956 |
| 226761_at   | 0.139083042 | 4.424835958 | 4.26E-05    | 0.000360894 |
| 226762_at   | -0.02367199 | -0.34177572 | 0.733743031 | 0.84485644  |
| 226763_at   | 0.349012917 | 4.573780354 | 2.53E-05    | 0.00023323  |
| 226764_at   | -0.05580676 | -1.34827583 | 0.182761136 | 0.339595904 |

|             |             |             |             |             |
|-------------|-------------|-------------|-------------|-------------|
| 226765_at   | 0.202841702 | 2.931874503 | 0.004799942 | 0.019075137 |
| 226766_at   | -0.7459773  | -6.68879603 | 9.36E-09    | 4.27E-07    |
| 226767_s_at | -0.01046021 | -0.25338097 | 0.800861181 | 0.887480483 |
| 226768_at   | -0.00397219 | -0.12285073 | 0.902645916 | 0.948269055 |
| 226769_at   | 0.382515927 | 4.291592778 | 6.74E-05    | 0.00052842  |
| 226770_at   | -0.00974496 | -0.22692961 | 0.821268729 | 0.900617233 |
| 226771_at   | 0.035570216 | 0.737847266 | 0.463553496 | 0.64143702  |
| 226772_s_at | 0.018875875 | 0.546354001 | 0.586898079 | 0.741822863 |
| 226773_at   | 0.088179058 | 1.266654895 | 0.210293137 | 0.375021782 |
| 226774_at   | 0.092265055 | 2.530531557 | 0.014097501 | 0.046133522 |
| 226775_at   | -0.20632067 | -3.00576281 | 0.0038964   | 0.01604662  |
| 226776_at   | -0.17250884 | -3.04001932 | 0.003533664 | 0.014751042 |
| 226777_at   | -0.34394681 | -4.92777318 | 7.17E-06    | 8.14E-05    |
| 226778_at   | -0.10737032 | -2.12309412 | 0.03798261  | 0.102631124 |
| 226779_at   | -0.37918884 | -4.85823712 | 9.21E-06    | 9.99E-05    |
| 226780_s_at | 0.164509803 | 3.329122029 | 0.001510857 | 0.007204014 |
| 226781_at   | 0.023814783 | 0.46218344  | 0.645662207 | 0.785049494 |
| 226782_at   | -0.00899435 | -0.16257533 | 0.871412459 | 0.930589382 |
| 226783_at   | 0.423218858 | 8.223366919 | 2.42E-11    | 9.73E-09    |
| 226784_at   | -0.05499092 | -1.62090942 | 0.110409315 | 0.234563481 |
| 226785_at   | -0.17603843 | -3.38227458 | 0.001286318 | 0.006297309 |
| 226786_at   | 0.080450555 | 2.479426104 | 0.016057485 | 0.051454874 |
| 226787_at   | 0.057477612 | 1.939451927 | 0.057267996 | 0.141851204 |
| 226788_at   | -0.02332816 | -0.75267163 | 0.454662034 | 0.633744679 |
| 226789_at   | -0.06993198 | -1.97234071 | 0.053298396 | 0.134083696 |
| 226790_at   | -0.14274466 | -2.01837677 | 0.048139383 | 0.123809939 |
| 226791_at   | -0.90943147 | -8.68064327 | 4.14E-12    | 3.86E-09    |
| 226792_s_at | -0.3380685  | -6.46366161 | 2.23E-08    | 8.01E-07    |
| 226793_at   | -0.18242946 | -4.10868781 | 0.000125366 | 0.000893456 |
| 226794_at   | -0.12443621 | -2.85204779 | 0.005992148 | 0.022879568 |
| 226795_at   | 0.100193726 | 2.083695135 | 0.041560984 | 0.110201696 |
| 226796_at   | 0.068261428 | 1.725109816 | 0.08978152  | 0.200595694 |
| 226797_at   | 0.060489603 | 1.077857047 | 0.285517138 | 0.463317798 |
| 226798_at   | 0.078488235 | 2.882133821 | 0.005513862 | 0.021350332 |
| 226799_at   | 0.14823634  | 3.373771574 | 0.00131998  | 0.006438831 |
| 226800_at   | -0.14185635 | -1.65943015 | 0.10237531  | 0.221588404 |
| 226801_s_at | 0.429762714 | 6.570550455 | 1.48E-08    | 5.97E-07    |
| 226802_s_at | -0.07049439 | -1.2126595  | 0.230128976 | 0.398069598 |
| 226803_at   | -0.05007905 | -1.44056657 | 0.155032102 | 0.301299995 |
| 226804_at   | 0.071105074 | 1.826415329 | 0.072885822 | 0.170840361 |
| 226805_at   | -0.07110495 | -1.33726566 | 0.186306656 | 0.344052695 |
| 226806_s_at | 0.575411043 | 8.046234744 | 4.80E-11    | 1.38E-08    |
| 226807_at   | -0.15885655 | -3.09467971 | 0.003019483 | 0.012913565 |
| 226808_at   | 0.295308279 | 5.325301756 | 1.67E-06    | 2.45E-05    |
| 226809_at   | 0.251201867 | 4.060954235 | 0.000147084 | 0.001018158 |
| 226810_at   | 0.590138737 | 5.360362174 | 1.47E-06    | 2.19E-05    |
| 226811_at   | 0.104883198 | 3.742163487 | 0.000417677 | 0.002459718 |
| 226812_at   | -0.01556071 | -0.54589336 | 0.587212671 | 0.742081399 |
| 226813_at   | -0.17156113 | -3.57236342 | 0.000715443 | 0.003864466 |
| 226814_at   | 0.282815154 | 3.329288071 | 0.001510101 | 0.007201178 |
| 226815_at   | -0.09203274 | -2.94758495 | 0.004592923 | 0.018393094 |
| 226816_s_at | 0.242868356 | 4.947504677 | 6.68E-06    | 7.66E-05    |
| 226817_at   | 0.047383293 | 1.002469023 | 0.320241108 | 0.501989253 |
| 226818_at   | -0.07068895 | -1.36613115 | 0.177120731 | 0.332139459 |
| 226819_at   | -0.01056696 | -0.42048626 | 0.675669139 | 0.805175688 |
| 226820_at   | 0.007672128 | 0.245358069 | 0.807036938 | 0.891384594 |
| 226821_at   | -0.05801549 | -0.98473953 | 0.328802829 | 0.511275638 |
| 226822_at   | -0.10011476 | -1.58664815 | 0.117977308 | 0.24656607  |
| 226823_at   | 0.332641726 | 6.197471663 | 6.22E-08    | 1.75E-06    |
| 226824_at   | 0.073809862 | 1.737538439 | 0.087548513 | 0.196876226 |
| 226825_s_at | 0.172812778 | 1.255265133 | 0.214368074 | 0.38008958  |
| 226826_at   | -0.02939267 | -0.49794901 | 0.620384682 | 0.767083475 |
| 226827_at   | 0.007198224 | 0.163607938 | 0.870603083 | 0.930159402 |
| 226828_s_at | 0.163359824 | 3.452142305 | 0.001038916 | 0.005261327 |
| 226829_at   | -0.09688354 | -2.76263632 | 0.007648934 | 0.028004109 |
| 226830_x_at | -0.03294006 | -0.87725787 | 0.383931053 | 0.566627932 |
| 226831_at   | -0.25161008 | -3.42473888 | 0.001130027 | 0.005637143 |
| 226832_at   | 0.099308823 | 1.689185666 | 0.096501517 | 0.211892321 |
| 226833_at   | -0.01016807 | -0.20938598 | 0.834873571 | 0.908942665 |
| 226834_at   | -0.05840503 | -1.72336932 | 0.090097952 | 0.201051411 |
| 226835_s_at | 0.010574177 | 0.136243075 | 0.892096367 | 0.942231196 |
| 226836_at   | -0.0331875  | -1.2238936  | 0.225893347 | 0.393425078 |
| 226837_at   | -0.15113252 | -1.80175355 | 0.076731818 | 0.177702269 |
| 226838_at   | 0.106734432 | 1.354946663 | 0.180638075 | 0.336897587 |
| 226839_at   | 0.012371584 | 0.470280635 | 0.639901165 | 0.781079993 |

|             |             |             |             |             |
|-------------|-------------|-------------|-------------|-------------|
| 226840_at   | 0.032515778 | 1.051815103 | 0.297204944 | 0.476201318 |
| 226841_at   | 0.003807744 | 0.072907571 | 0.942128098 | 0.969988442 |
| 226842_at   | -0.06059131 | -1.95689041 | 0.055132867 | 0.137738167 |
| 226843_s_at | 0.01174848  | 0.238153938 | 0.812592977 | 0.894823342 |
| 226844_at   | -0.29037511 | -5.83052479 | 2.52E-07    | 5.19E-06    |
| 226845_s_at | 0.078625642 | 1.286133546 | 0.20345795  | 0.366296435 |
| 226846_at   | 0.585798964 | 5.987747023 | 1.39E-07    | 3.26E-06    |
| 226847_at   | -0.03965171 | -1.33132841 | 0.188240099 | 0.346433697 |
| 226848_at   | -0.03660783 | -0.87306098 | 0.386195472 | 0.568847013 |
| 226849_at   | -0.13331606 | -2.49328308 | 0.0155031   | 0.049983016 |
| 226850_at   | 0.212933019 | 3.38091717  | 0.001291637 | 0.006318502 |
| 226851_at   | 0.086780261 | 0.825833911 | 0.412249838 | 0.594523064 |
| 226852_at   | -0.35652587 | -5.5871204  | 6.31E-07    | 1.09E-05    |
| 226853_at   | 0.583293919 | 6.291189566 | 4.34E-08    | 1.32E-06    |
| 226854_at   | -0.06708416 | -2.34148198 | 0.022630158 | 0.068042723 |
| 226855_at   | 0.27494702  | 6.458821754 | 2.28E-08    | 8.13E-07    |
| 226856_at   | 0.226813441 | 2.595896906 | 0.011907003 | 0.04021977  |
| 226857_at   | -0.02162075 | -0.43775169 | 0.663176504 | 0.796717409 |
| 226858_at   | 0.053443436 | 1.619175805 | 0.110782574 | 0.235128213 |
| 226859_at   | 0.048274586 | 1.070630269 | 0.288728159 | 0.466921367 |
| 226860_at   | -0.15643003 | -2.46856871 | 0.016504285 | 0.052619957 |
| 226861_at   | 0.060333061 | 1.028357835 | 0.308010028 | 0.4884184   |
| 226862_at   | -0.04940327 | -1.17982074 | 0.242841744 | 0.413499242 |
| 226863_at   | 0.159829908 | 1.794687685 | 0.07786452  | 0.179757277 |
| 226864_at   | -0.81582253 | -5.81620805 | 2.66E-07    | 5.41E-06    |
| 226865_at   | 0.357512591 | 3.887050562 | 0.000261262 | 0.001653636 |
| 226866_at   | 0.232315206 | 5.006012016 | 5.40E-06    | 6.42E-05    |
| 226867_at   | -0.04188771 | -0.87409045 | 0.385639252 | 0.568267646 |
| 226868_at   | 0.235315063 | 4.860238185 | 9.15E-06    | 9.92E-05    |
| 226869_at   | 0.147519241 | 2.917891403 | 0.004991449 | 0.019690868 |
| 226870_at   | -0.02633532 | -0.69348298 | 0.490747809 | 0.664923482 |
| 226871_s_at | 0.077597448 | 2.283018282 | 0.026075538 | 0.07627752  |
| 226872_at   | 0.344863387 | 4.022348298 | 0.000167264 | 0.001132119 |
| 226873_at   | 0.066079036 | 1.092858869 | 0.278930777 | 0.45583812  |
| 226874_at   | 0.148859984 | 3.181266994 | 0.002345973 | 0.010418981 |
| 226875_at   | -0.35936712 | -6.0240144  | 1.21E-07    | 2.93E-06    |
| 226876_at   | -0.11871246 | -2.05468409 | 0.044379771 | 0.116213789 |
| 226877_at   | 0.108733484 | 2.73396679  | 0.008263496 | 0.029877208 |
| 226878_at   | 0.043249721 | 1.13716775  | 0.260099411 | 0.434166089 |
| 226879_at   | 0.273043965 | 5.372358014 | 1.41E-06    | 2.11E-05    |
| 226880_at   | -0.08897919 | -0.89843795 | 0.372631026 | 0.555750711 |
| 226881_at   | -0.04932165 | -1.14708604 | 0.256010666 | 0.429458324 |
| 226882_x_at | -0.05142366 | -1.43716517 | 0.155992381 | 0.302574171 |
| 226883_at   | -0.0197026  | -0.47881176 | 0.633855396 | 0.776710727 |
| 226884_at   | -0.70463825 | -5.26483982 | 2.09E-06    | 2.94E-05    |
| 226885_at   | 0.165882996 | 2.316831871 | 0.024030076 | 0.071472923 |
| 226886_at   | -0.14044444 | -2.85257839 | 0.005983391 | 0.022853577 |
| 226887_at   | 0.041827972 | 1.332256364 | 0.187936917 | 0.346115137 |
| 226888_at   | -0.04373172 | -1.23889962 | 0.220325013 | 0.387302019 |
| 226889_at   | 0.077971182 | 1.597203449 | 0.115602469 | 0.242786914 |
| 226890_at   | 0.076109782 | 1.792708609 | 0.078184271 | 0.180309171 |
| 226891_at   | -0.0247977  | -0.65633849 | 0.514176943 | 0.684752106 |
| 226892_at   | 0.103068005 | 2.521608276 | 0.014423301 | 0.047013797 |
| 226893_at   | -0.11321462 | -2.47226845 | 0.016350792 | 0.0521964   |
| 226894_at   | -0.00583762 | -0.09922719 | 0.921296753 | 0.958708077 |
| 226895_at   | 0.503518325 | 8.484271322 | 8.82E-12    | 5.24E-09    |
| 226896_at   | -0.11589013 | -2.01979547 | 0.047987478 | 0.123504542 |
| 226897_s_at | 0.047955749 | 1.021321656 | 0.311302451 | 0.492207214 |
| 226898_s_at | -0.0287664  | -0.83005851 | 0.409876518 | 0.592093909 |
| 226899_at   | 0.33176349  | 3.827159082 | 0.000317521 | 0.001951948 |
| 226900_at   | -0.05542474 | -1.28096421 | 0.205255524 | 0.368464005 |
| 226901_at   | -0.1026251  | -1.72368792 | 0.090039959 | 0.200952101 |
| 226902_at   | -0.01652326 | -0.46743451 | 0.641923628 | 0.78241609  |
| 226903_s_at | -0.05661245 | -1.2518423  | 0.21560401  | 0.381554383 |
| 226904_at   | 0.025240503 | 0.546338743 | 0.586908498 | 0.741822863 |
| 226905_at   | -0.30630304 | -3.23440706 | 0.002005411 | 0.009128866 |
| 226906_s_at | 0.105466406 | 2.236274214 | 0.029156937 | 0.083233671 |
| 226907_at   | -0.12028144 | -2.46326726 | 0.016726493 | 0.053217086 |
| 226908_at   | 0.150865429 | 4.536695122 | 2.89E-05    | 0.000259761 |
| 226909_at   | 0.047142071 | 1.068167576 | 0.289828072 | 0.468039609 |
| 226910_at   | 0.092533054 | 1.544119977 | 0.127945962 | 0.262021277 |
| 226911_at   | 0.059723607 | 1.576615885 | 0.120270707 | 0.249936688 |
| 226912_at   | -0.58496612 | -5.92306292 | 1.77E-07    | 3.93E-06    |
| 226913_s_at | 0.328171098 | 4.103098025 | 0.000127739 | 0.000907619 |
| 226914_at   | -0.803681   | -7.0992436  | 1.90E-09    | 1.41E-07    |

|             |             |             |             |             |
|-------------|-------------|-------------|-------------|-------------|
| 226915_s_at | -0.32398695 | -4.26751955 | 7.32E-05    | 0.000567374 |
| 226916_x_at | 0.001124983 | 0.025888422 | 0.979434345 | 0.989709681 |
| 226917_s_at | 0.331794696 | 7.210680112 | 1.23E-09    | 1.08E-07    |
| 226918_at   | -0.82611663 | -7.60933923 | 2.62E-10    | 3.88E-08    |
| 226919_at   | 0.042241976 | 0.890529547 | 0.376825379 | 0.559522902 |
| 226920_at   | -0.06795558 | -1.6326137  | 0.1079159   | 0.230648308 |
| 226921_at   | -0.00960784 | -0.15091637 | 0.880560297 | 0.936040128 |
| 226922_at   | -0.2879126  | -4.39943167 | 4.65E-05    | 0.000387655 |
| 226923_at   | -0.05741109 | -1.48888481 | 0.141883136 | 0.282703572 |
| 226924_at   | -0.0180075  | -0.26444887 | 0.792362483 | 0.881757529 |
| 226925_at   | 0.057716044 | 0.937706347 | 0.352246359 | 0.535518825 |
| 226926_at   | -0.13584372 | -2.73567388 | 0.00822567  | 0.029771191 |
| 226927_at   | -0.06274475 | -2.34990095 | 0.022168957 | 0.06694426  |
| 226928_x_at | -0.0756689  | -2.26120283 | 0.027475778 | 0.079323309 |
| 226929_at   | -0.0170037  | -0.45888972 | 0.648011926 | 0.786448039 |
| 226930_at   | 0.134006394 | 1.557274572 | 0.124793137 | 0.257212529 |
| 226931_at   | -0.27001684 | -2.55012411 | 0.013405406 | 0.044319752 |
| 226932_at   | 0.542734807 | 4.92125934  | 7.34E-06    | 8.29E-05    |
| 226933_s_at | 0.234444854 | 2.658061983 | 0.010115701 | 0.035212314 |
| 226934_at   | -0.12088609 | -1.19500748 | 0.236900917 | 0.406245714 |
| 226935_s_at | -0.05532556 | -1.47727289 | 0.144960065 | 0.287093646 |
| 226936_at   | -0.10394339 | -3.73893073 | 0.000422029 | 0.00248012  |
| 226937_at   | -0.01399576 | -0.44459678 | 0.658249876 | 0.793313857 |
| 226938_at   | -0.02709609 | -0.83207327 | 0.4087476   | 0.590921516 |
| 226939_at   | 0.155546192 | 2.376968715 | 0.02074245  | 0.063416445 |
| 226940_at   | 0.053423961 | 1.672738128 | 0.099713164 | 0.217140804 |
| 226941_at   | 0.002511549 | 0.048969455 | 0.961110258 | 0.980188777 |
| 226942_at   | -0.03686643 | -0.80389022 | 0.424711346 | 0.606132877 |
| 226943_at   | -0.23416205 | -3.1327359  | 0.002703781 | 0.011774079 |
| 226944_at   | 0.045144933 | 1.258263571 | 0.213289695 | 0.378583067 |
| 226945_at   | 0.203272769 | 5.402009584 | 1.26E-06    | 1.92E-05    |
| 226946_at   | 0.368536048 | 3.155321909 | 0.002531326 | 0.011116245 |
| 226947_at   | -0.08038509 | -1.68888381 | 0.096559685 | 0.211946392 |
| 226948_at   | 0.070354787 | 2.073331798 | 0.042549541 | 0.112302845 |
| 226949_at   | 0.117093102 | 3.124776844 | 0.002767132 | 0.012002007 |
| 226950_at   | 0.204605027 | 3.61262758  | 0.000630466 | 0.003481328 |
| 226951_at   | 0.3673551   | 5.129115566 | 3.45E-06    | 4.44E-05    |
| 226952_at   | -0.31048512 | -4.56514164 | 2.61E-05    | 0.000239288 |
| 226953_at   | -0.11627495 | -4.27798397 | 7.07E-05    | 0.000549739 |
| 226954_at   | -0.11233374 | -2.92328177 | 0.0049168   | 0.019451327 |
| 226955_at   | -0.01724555 | -0.41497101 | 0.679679376 | 0.808127799 |
| 226956_at   | 0.321044207 | 6.73575926  | 7.81E-09    | 3.73E-07    |
| 226957_x_at | 0.094845014 | 2.321969875 | 0.023732082 | 0.070784451 |
| 226958_s_at | 0.150847205 | 4.117463265 | 0.000121726 | 0.000870986 |
| 226959_at   | -0.65185758 | -7.09974725 | 1.90E-09    | 1.41E-07    |
| 226960_at   | -0.08156719 | -2.07189221 | 0.042688464 | 0.112609495 |
| 226961_at   | -0.07864968 | -1.67927017 | 0.098427358 | 0.214969236 |
| 226962_at   | 0.408223767 | 4.990531687 | 5.71E-06    | 6.72E-05    |
| 226963_at   | -0.09264948 | -1.08938078 | 0.280448269 | 0.457654874 |
| 226964_at   | -0.01084705 | -0.20486896 | 0.838384862 | 0.910715049 |
| 226965_at   | 0.311055676 | 4.310560673 | 6.32E-05    | 0.000500264 |
| 226966_at   | 0.089172698 | 2.566645902 | 0.01284588  | 0.042782089 |
| 226967_at   | -0.13218002 | -3.69980131 | 0.000478274 | 0.002758778 |
| 226968_at   | 0.487957556 | 7.988446558 | 6.01E-11    | 1.59E-08    |
| 226969_at   | -0.13757015 | -3.94573078 | 0.000215511 | 0.001404028 |
| 226970_at   | -0.20735211 | -4.02053864 | 0.000168273 | 0.001138085 |
| 226971_at   | 0.208079323 | 5.625789033 | 5.45E-07    | 9.71E-06    |
| 226972_s_at | -0.01964359 | -0.30718726 | 0.759790494 | 0.861688451 |
| 226973_at   | -0.32030209 | -4.49369044 | 3.35E-05    | 0.000294782 |
| 226974_at   | -0.97897478 | -8.52734901 | 7.47E-12    | 4.85E-09    |
| 226975_at   | 0.187341095 | 2.296898883 | 0.025217884 | 0.074230237 |
| 226976_at   | -0.09706437 | -1.85407053 | 0.068766789 | 0.16350954  |
| 226977_at   | 0.101425562 | 1.790397629 | 0.078559033 | 0.180989606 |
| 226978_at   | 0.411847568 | 7.36106766  | 6.88E-10    | 7.24E-08    |
| 226979_at   | 0.263213624 | 4.702976341 | 1.61E-05    | 0.000159051 |
| 226980_at   | 0.00732154  | 0.292796546 | 0.770712556 | 0.868774245 |
| 226981_at   | 0.146588983 | 3.015073974 | 0.003794515 | 0.01568774  |
| 226982_at   | 0.229751876 | 2.247168328 | 0.028411386 | 0.081536099 |
| 226983_at   | -0.0827565  | -2.30787369 | 0.024557598 | 0.072674359 |
| 226984_at   | -0.00202488 | -0.05946912 | 0.952780922 | 0.975755703 |
| 226985_at   | 0.118299389 | 3.372532803 | 0.001324954 | 0.006456747 |
| 226986_at   | 0.09787192  | 2.275010821 | 0.02658198  | 0.077348906 |
| 226987_at   | 0.106060759 | 3.206543377 | 0.002177716 | 0.009793366 |
| 226988_s_at | 0.020490285 | 0.681146182 | 0.498463479 | 0.671434943 |
| 226989_at   | -0.15648357 | -2.3850317  | 0.020333683 | 0.062422925 |

|             |             |             |             |             |
|-------------|-------------|-------------|-------------|-------------|
| 226990_at   | -0.13501717 | -2.82087593 | 0.006527906 | 0.024565945 |
| 226991_at   | -0.00928646 | -0.17879048 | 0.858719282 | 0.923009301 |
| 226992_at   | 0.123072621 | 2.352098673 | 0.022049952 | 0.066659856 |
| 226993_at   | -0.02858014 | -0.48769912 | 0.627583723 | 0.772160878 |
| 226994_at   | -0.44619042 | -7.07401406 | 2.10E-09    | 1.51E-07    |
| 226995_at   | -0.08284851 | -1.38375313 | 0.17168542  | 0.324699116 |
| 226996_at   | -0.01830576 | -0.37231757 | 0.711000321 | 0.830270062 |
| 226997_at   | 0.040623039 | 1.282536836 | 0.204707414 | 0.367834664 |
| 226998_at   | -0.06357349 | -1.83051043 | 0.072263123 | 0.169736873 |
| 226999_at   | 0.215920924 | 3.243197239 | 0.001953772 | 0.008935527 |
| 227000_at   | 0.412510408 | 4.260775427 | 7.49E-05    | 0.000578677 |
| 227001_at   | -0.23431784 | -3.80309712 | 0.000343255 | 0.002081794 |
| 227002_at   | -0.01844474 | -0.52564871 | 0.601116984 | 0.752482221 |
| 227003_at   | 0.372859006 | 6.081434401 | 9.69E-08    | 2.46E-06    |
| 227004_at   | -0.98185318 | -7.12630691 | 1.71E-09    | 1.31E-07    |
| 227005_at   | -0.12959777 | -2.81930894 | 0.00655597  | 0.024652876 |
| 227006_at   | 0.337512406 | 2.078639684 | 0.042040703 | 0.11126869  |
| 227007_at   | 0.115979853 | 3.130556963 | 0.002720988 | 0.011832737 |
| 227008_at   | 0.009351857 | 0.285819363 | 0.776024989 | 0.871782139 |
| 227009_at   | -0.04016605 | -0.99312112 | 0.324736488 | 0.506973246 |
| 227010_at   | 0.010411884 | 0.312918674 | 0.755454054 | 0.859496782 |
| 227011_at   | -0.01453415 | -0.50384253 | 0.616262125 | 0.764005581 |
| 227012_at   | -0.50281166 | -4.81121893 | 1.09E-05    | 0.000114658 |
| 227013_at   | 0.759252848 | 7.027528418 | 2.52E-09    | 1.71E-07    |
| 227014_at   | -0.7772377  | -6.45713138 | 2.29E-08    | 8.15E-07    |
| 227015_at   | -0.74747955 | -7.39607562 | 6.00E-10    | 6.57E-08    |
| 227016_at   | 0.088711086 | 2.951929316 | 0.004537159 | 0.018218726 |
| 227017_at   | 0.032601375 | 0.582645338 | 0.562368712 | 0.72332525  |
| 227018_at   | -0.0675008  | -1.59401542 | 0.116315646 | 0.243883595 |
| 227019_at   | 0.05897945  | 1.553333831 | 0.125731047 | 0.25879298  |
| 227020_at   | 0.077409787 | 1.031516892 | 0.306539533 | 0.486690995 |
| 227021_at   | 0.153810839 | 2.081693243 | 0.041750375 | 0.110591972 |
| 227022_at   | -0.07020179 | -1.39238293 | 0.169070796 | 0.321194364 |
| 227023_at   | -0.00228121 | -0.07013965 | 0.944321455 | 0.971270943 |
| 227024_s_at | 0.067208177 | 2.15889396  | 0.034967238 | 0.096168904 |
| 227025_at   | -0.13306388 | -2.56086645 | 0.01303915  | 0.043302691 |
| 227026_at   | 0.108446306 | 2.231024831 | 0.02952231  | 0.084028218 |
| 227027_at   | 0.018922385 | 0.331512912 | 0.741440461 | 0.850001465 |
| 227028_s_at | -0.00581162 | -0.18540369 | 0.853553022 | 0.919780866 |
| 227029_at   | 0.184452256 | 1.916952882 | 0.060126598 | 0.147291051 |
| 227030_at   | 0.048437823 | 1.651960473 | 0.103894794 | 0.22416594  |
| 227031_at   | -0.0772912  | -1.27777998 | 0.206368682 | 0.369823535 |
| 227032_at   | -0.28874766 | -7.26743834 | 9.90E-10    | 9.29E-08    |
| 227033_at   | -0.15645899 | -3.3875213  | 0.001265954 | 0.006205092 |
| 227034_at   | 0.43739984  | 5.976875219 | 1.44E-07    | 3.35E-06    |
| 227035_x_at | -0.03635157 | -1.19198044 | 0.238076562 | 0.407558039 |
| 227036_at   | -0.24702968 | -4.11564199 | 0.000122473 | 0.00087563  |
| 227037_at   | -0.12548143 | -2.34268584 | 0.022563689 | 0.067883972 |
| 227038_at   | 0.330570788 | 1.666368014 | 0.100980299 | 0.219227219 |
| 227039_at   | 0.129852217 | 3.311429303 | 0.001593479 | 0.007537654 |
| 227040_at   | 0.025145283 | 0.380362397 | 0.705052474 | 0.826215632 |
| 227041_at   | 0.117298036 | 2.197708886 | 0.031936755 | 0.089543128 |
| 227042_at   | -0.08812374 | -3.22872481 | 0.002039472 | 0.009255492 |
| 227043_at   | 0.163474047 | 4.80387909  | 1.12E-05    | 0.000117188 |
| 227044_at   | 0.242732286 | 2.831846014 | 0.006334514 | 0.023969358 |
| 227045_at   | 0.104730067 | 2.548116803 | 0.013474869 | 0.044496739 |
| 227046_at   | 0.419713625 | 6.289617476 | 4.37E-08    | 1.33E-06    |
| 227047_x_at | 0.076304046 | 1.96243044  | 0.054468962 | 0.136460948 |
| 227048_at   | 0.260912074 | 4.388274936 | 4.84E-05    | 0.000400214 |
| 227049_at   | -0.42173559 | -5.77709766 | 3.08E-07    | 6.11E-06    |
| 227050_at   | -0.01644804 | -0.4423916  | 0.659835365 | 0.794358668 |
| 227051_at   | 0.123307126 | 2.633125109 | 0.010802446 | 0.037094348 |
| 227052_at   | 0.061568693 | 0.910419779 | 0.366333045 | 0.549557026 |
| 227053_at   | -0.78839159 | -5.49503267 | 8.90E-07    | 1.45E-05    |
| 227054_at   | 0.072852646 | 2.57017007  | 0.012729308 | 0.042469821 |
| 227055_at   | 0.042322449 | 1.220063212 | 0.227331074 | 0.394880498 |
| 227056_at   | -0.09239414 | -2.46080283 | 0.016830702 | 0.053510546 |
| 227057_at   | -0.1508665  | -3.56549751 | 0.000730982 | 0.003936979 |
| 227058_at   | -0.06893915 | -2.1519324  | 0.035536629 | 0.097411864 |
| 227059_at   | 0.234391686 | 3.819874522 | 0.00032511  | 0.001990657 |
| 227060_at   | -0.02786229 | -1.22240691 | 0.22645058  | 0.393978875 |
| 227061_at   | 0.272761518 | 3.31298911  | 0.001586027 | 0.007507171 |
| 227062_at   | 1.225938596 | 6.142335561 | 7.68E-08    | 2.05E-06    |
| 227063_at   | 0.111967779 | 2.669490861 | 0.009814482 | 0.034377995 |
| 227064_at   | 0.603656004 | 7.931256643 | 7.50E-11    | 1.80E-08    |



|             |             |             |             |             |
|-------------|-------------|-------------|-------------|-------------|
| 227065_at   | -0.06880782 | -1.81802859 | 0.07417517  | 0.173136089 |
| 227066_at   | 0.122744691 | 2.406733691 | 0.019269041 | 0.059820226 |
| 227067_x_at | 0.32144119  | 4.269424985 | 7.28E-05    | 0.000564575 |
| 227068_at   | -0.2637668  | -3.81188112 | 0.000333637 | 0.002035339 |
| 227069_at   | 0.100617795 | 2.541138356 | 0.013718907 | 0.04514582  |
| 227070_at   | -0.19098849 | -4.04551223 | 0.000154857 | 0.001061806 |
| 227071_at   | -0.05147237 | -1.21687148 | 0.228534183 | 0.396046753 |
| 227072_at   | -0.19454372 | -3.7083693  | 0.000465376 | 0.002695282 |
| 227073_at   | 0.072671833 | 1.658863912 | 0.102489855 | 0.221770627 |
| 227074_at   | 0.167003183 | 2.557660463 | 0.013147495 | 0.043605778 |
| 227075_at   | -0.00860286 | -0.17935944 | 0.858274566 | 0.922688514 |
| 227076_at   | -0.02370835 | -0.76745193 | 0.445895933 | 0.625898459 |
| 227077_at   | 0.216051357 | 4.996919023 | 5.58E-06    | 6.59E-05    |
| 227078_at   | 0.032333611 | 1.001698193 | 0.320610212 | 0.502409242 |
| 227079_at   | -0.00802615 | -0.28534073 | 0.776389815 | 0.871933867 |
| 227080_at   | -0.08429134 | -1.97121954 | 0.053429735 | 0.13429532  |
| 227081_at   | 0.737664875 | 5.633900722 | 5.29E-07    | 9.50E-06    |
| 227082_at   | 0.61808535  | 6.250974566 | 5.06E-08    | 1.48E-06    |
| 227083_at   | -0.59338318 | -5.08088474 | 4.11E-06    | 5.13E-05    |
| 227084_at   | 0.88634351  | 7.945504896 | 7.10E-11    | 1.74E-08    |
| 227085_at   | 0.146988045 | 3.169697996 | 0.00242699  | 0.01071597  |
| 227086_at   | -0.01219368 | -0.37113728 | 0.711874484 | 0.830724696 |
| 227087_at   | -0.76024189 | -6.41770651 | 2.67E-08    | 9.08E-07    |
| 227088_at   | 0.075575059 | 2.407966064 | 0.019210111 | 0.059670439 |
| 227089_at   | -0.03822782 | -1.37619646 | 0.17400031  | 0.327897699 |
| 227090_at   | 0.024232874 | 0.876468723 | 0.384356198 | 0.566975185 |
| 227091_at   | 0.193132592 | 2.221222941 | 0.030215377 | 0.085581193 |
| 227092_at   | 0.075772148 | 1.390144905 | 0.169745904 | 0.322053147 |
| 227093_at   | 0.162552669 | 4.545470571 | 2.80E-05    | 0.000253016 |
| 227094_at   | 0.156220991 | 3.341138232 | 0.001457069 | 0.006995323 |
| 227095_at   | 0.367841823 | 4.178867703 | 9.90E-05    | 0.000730482 |
| 227096_at   | 0.099097721 | 3.023424287 | 0.003705261 | 0.015368496 |
| 227097_at   | -0.03042317 | -0.65698719 | 0.513762709 | 0.684383993 |
| 227098_at   | 0.112597735 | 2.859075071 | 0.00587712  | 0.022499859 |
| 227099_s_at | 0.307985153 | 1.486227848 | 0.142582601 | 0.283667271 |
| 227100_at   | -0.23606028 | -3.75644001 | 0.000398965 | 0.002367321 |
| 227101_at   | -0.01070686 | -0.28510661 | 0.776568287 | 0.871976029 |
| 227102_at   | -0.06976963 | -2.17212447 | 0.033907093 | 0.093879543 |
| 227103_s_at | -0.02316383 | -0.7295424  | 0.468577775 | 0.645437381 |
| 227104_x_at | 0.047907487 | 0.984907876 | 0.328720825 | 0.511211327 |
| 227105_at   | 0.384150305 | 2.821304486 | 0.006520249 | 0.024543332 |
| 227106_at   | 0.117308593 | 4.263386978 | 7.43E-05    | 0.000574437 |
| 227107_at   | -0.39780245 | -4.41299386 | 4.44E-05    | 0.000372378 |
| 227108_at   | 0.289943268 | 4.819663121 | 1.06E-05    | 0.000111845 |
| 227109_at   | 0.072054787 | 1.874131299 | 0.065903185 | 0.1582668   |
| 227110_at   | -0.18781403 | -3.81033804 | 0.000335307 | 0.002044136 |
| 227111_at   | 0.277736284 | 4.586040974 | 2.43E-05    | 0.000224736 |
| 227112_at   | -0.00683566 | -0.11199511 | 0.91121025  | 0.952991467 |
| 227113_at   | 0.164413705 | 3.279457586 | 0.001753704 | 0.008168798 |
| 227114_at   | -0.06532954 | -2.49433164 | 0.015461861 | 0.049878844 |
| 227115_at   | -0.04751541 | -1.23621758 | 0.221312768 | 0.388305207 |
| 227116_at   | 0.268131465 | 4.895221511 | 8.07E-06    | 8.93E-05    |
| 227117_at   | 0.095492623 | 2.247865698 | 0.02836424  | 0.081424235 |
| 227118_s_at | 0.024002531 | 0.606248414 | 0.546692537 | 0.710472479 |
| 227119_at   | 0.15873228  | 3.575614696 | 0.000708195 | 0.003829018 |
| 227120_at   | 0.027557043 | 0.75544433  | 0.45301001  | 0.632309672 |
| 227121_at   | 0.430449508 | 6.901308945 | 4.11E-09    | 2.40E-07    |
| 227122_at   | 0.120884014 | 3.380776677 | 0.001292189 | 0.006319126 |
| 227123_at   | -0.20167155 | -2.16841067 | 0.034201793 | 0.094559018 |
| 227124_at   | -0.31461695 | -3.72137633 | 0.000446431 | 0.002601288 |
| 227125_at   | 0.096409798 | 2.191206983 | 0.032427706 | 0.090641005 |
| 227126_at   | -0.03524713 | -0.51500457 | 0.608488202 | 0.75790961  |
| 227127_at   | -0.00739379 | -0.27245211 | 0.786232707 | 0.878150451 |
| 227128_s_at | 0.041826683 | 1.038873967 | 0.303133443 | 0.482861312 |
| 227129_x_at | 0.130265688 | 1.406730849 | 0.16479168  | 0.315182513 |
| 227130_s_at | 0.00393055  | 0.144603556 | 0.885520363 | 0.938635203 |
| 227131_at   | 0.169506226 | 3.955932715 | 0.000208388 | 0.001363584 |
| 227132_at   | -0.33258974 | -4.61637563 | 2.18E-05    | 0.00020558  |
| 227133_at   | 0.108652326 | 1.364531548 | 0.17762055  | 0.33286529  |
| 227134_at   | 0.039930457 | 1.25095207  | 0.215926319 | 0.381882828 |
| 227135_at   | -0.06581826 | -1.43917842 | 0.155423445 | 0.301863656 |
| 227136_s_at | -0.0462809  | -1.24632613 | 0.217606884 | 0.383928264 |
| 227137_at   | -0.05665576 | -1.26371412 | 0.211339715 | 0.37627259  |
| 227138_at   | 0.157334369 | 3.43108491  | 0.001108277 | 0.005548461 |
| 227139_s_at | 0.425385092 | 5.975326003 | 1.45E-07    | 3.36E-06    |

|             |             |             |             |             |
|-------------|-------------|-------------|-------------|-------------|
| 227140_at   | -0.48928737 | -4.05969217 | 0.000147705 | 0.001021543 |
| 227141_at   | 0.03736747  | 0.752851929 | 0.454554502 | 0.633663606 |
| 227142_at   | -0.10637655 | -2.95489422 | 0.004499463 | 0.018098279 |
| 227143_s_at | -0.01994521 | -0.41258984 | 0.681413656 | 0.809466246 |
| 227144_at   | 0.139210923 | 2.476518891 | 0.01617604  | 0.051779086 |
| 227145_at   | 0.033547529 | 0.998253954 | 0.322262932 | 0.504115329 |
| 227146_at   | -0.00146389 | -0.04277987 | 0.966022532 | 0.982693116 |
| 227147_s_at | 0.023757376 | 0.574353325 | 0.56792832  | 0.727419611 |
| 227148_at   | 0.150771406 | 2.694094677 | 0.00919366  | 0.032619115 |
| 227149_at   | 0.004456355 | 0.065989737 | 0.947610746 | 0.973171378 |
| 227150_at   | 0.263300442 | 5.731640637 | 3.66E-07    | 7.03E-06    |
| 227151_at   | 0.082810594 | 2.74928894  | 0.007929627 | 0.028878006 |
| 227152_at   | 0.037763893 | 0.947396605 | 0.347329514 | 0.530330431 |
| 227153_at   | -0.01675758 | -0.52173093 | 0.603825294 | 0.754469742 |
| 227154_at   | -0.05008718 | -1.06155756 | 0.292794597 | 0.471297538 |
| 227155_at   | -0.15135275 | -2.57303094 | 0.012635384 | 0.042223762 |
| 227156_at   | -0.29814808 | -3.47584723 | 0.000965766 | 0.004953992 |
| 227157_at   | 0.137647884 | 2.97792603  | 0.004216396 | 0.017135506 |
| 227158_at   | -0.03060006 | -0.43299147 | 0.66661143  | 0.799275582 |
| 227159_at   | 0.091141078 | 3.366467051 | 0.001349562 | 0.006554513 |
| 227160_s_at | -0.28440421 | -4.52574175 | 3.00E-05    | 0.000268296 |
| 227161_at   | -0.03947855 | -0.89348399 | 0.375254959 | 0.558311435 |
| 227162_at   | 0.119731674 | 3.281257467 | 0.001744295 | 0.008133976 |
| 227163_at   | -0.06901402 | -1.53511937 | 0.130139556 | 0.265436644 |
| 227164_at   | 0.27836632  | 4.621375535 | 2.14E-05    | 0.000202584 |
| 227165_at   | -0.04361297 | -1.13757733 | 0.259929652 | 0.433963764 |
| 227166_at   | -0.18668643 | -4.51876868 | 3.07E-05    | 0.000273607 |
| 227167_s_at | 0.341032518 | 4.441592539 | 4.02E-05    | 0.000343798 |
| 227168_at   | -0.25500666 | -3.4848248  | 0.000939362 | 0.004838305 |
| 227169_at   | -0.22319024 | -3.09105746 | 0.003051266 | 0.013033277 |
| 227170_at   | 0.082704673 | 2.170963483 | 0.03399898  | 0.094114737 |
| 227171_at   | -0.05223175 | -1.49613129 | 0.139989189 | 0.280041039 |
| 227172_at   | 0.065962904 | 1.345889871 | 0.183525081 | 0.340636075 |
| 227173_s_at | 0.049564736 | 1.261108439 | 0.212270265 | 0.377358102 |
| 227174_at   | -0.0307146  | -1.0189548  | 0.312415302 | 0.493357727 |
| 227175_at   | -0.03174631 | -0.73875582 | 0.463005715 | 0.640937012 |
| 227176_at   | -0.96048555 | -5.85120438 | 2.33E-07    | 4.86E-06    |
| 227177_at   | -0.13091037 | -3.64090819 | 0.000576633 | 0.003232672 |
| 227178_at   | -0.45626068 | -5.68181545 | 4.42E-07    | 8.20E-06    |
| 227179_at   | -0.15248942 | -4.04458794 | 0.000155334 | 0.001064591 |
| 227180_at   | 0.426611928 | 4.06798571  | 0.00014367  | 0.000998122 |
| 227181_at   | -0.37607588 | -6.60318656 | 1.30E-08    | 5.48E-07    |
| 227182_at   | 0.034887411 | 0.900464249 | 0.37156114  | 0.554771984 |
| 227183_at   | -0.00245485 | -0.05972747 | 0.952576039 | 0.975747583 |
| 227184_at   | 0.141689231 | 4.215058267 | 8.75E-05    | 0.000658239 |
| 227185_at   | -0.20395841 | -4.89029978 | 8.21E-06    | 9.05E-05    |
| 227186_s_at | -0.1762034  | -3.70150456 | 0.000475683 | 0.00274667  |
| 227187_at   | -0.00122347 | -0.02387482 | 0.981033618 | 0.990456718 |
| 227188_at   | 0.305119039 | 4.512745023 | 3.14E-05    | 0.000278266 |
| 227189_at   | -0.99539559 | -6.29204382 | 4.33E-08    | 1.32E-06    |
| 227190_at   | -0.01567176 | -0.44690056 | 0.656595175 | 0.792217383 |
| 227191_at   | -0.99398799 | -6.66636121 | 1.02E-08    | 4.55E-07    |
| 227192_at   | -0.34642819 | -6.20105874 | 6.13E-08    | 1.73E-06    |
| 227193_at   | -0.63816088 | -7.98177123 | 6.17E-11    | 1.62E-08    |
| 227194_at   | -0.08857692 | -2.17924883 | 0.033347986 | 0.092633985 |
| 227195_at   | -0.38174507 | -5.58376474 | 6.39E-07    | 1.10E-05    |
| 227196_at   | 0.21950468  | 2.342861869 | 0.022553985 | 0.067859344 |
| 227197_at   | 0.66072108  | 6.558172042 | 1.55E-08    | 6.17E-07    |
| 227198_at   | -0.9129826  | -7.3714658  | 6.61E-10    | 7.05E-08    |
| 227199_at   | 0.16171136  | 2.787603356 | 0.007148267 | 0.026507394 |
| 227200_at   | 0.096195906 | 2.121192975 | 0.038148901 | 0.102987054 |
| 227201_at   | -0.11032159 | -3.46086475 | 0.001011408 | 0.005143004 |
| 227202_at   | -0.15818613 | -1.58886858 | 0.117474498 | 0.245771476 |
| 227203_at   | -0.13961396 | -2.17211661 | 0.033907715 | 0.093879543 |
| 227204_at   | 0.08596992  | 2.668037054 | 0.009852338 | 0.03448087  |
| 227205_at   | 0.262466986 | 5.674727822 | 4.54E-07    | 8.37E-06    |
| 227206_at   | -0.42321116 | -4.95609822 | 6.47E-06    | 7.47E-05    |
| 227207_x_at | 0.023574258 | 0.828960529 | 0.410492547 | 0.592715589 |
| 227208_at   | 0.06274144  | 1.393178089 | 0.168831431 | 0.320863    |
| 227209_at   | -0.204119   | -1.98947945 | 0.051324876 | 0.130130558 |
| 227210_at   | 0.344687429 | 4.634800565 | 2.04E-05    | 0.000194797 |
| 227211_at   | 0.02396159  | 0.603864211 | 0.548265896 | 0.711575415 |
| 227212_s_at | 0.001270989 | 0.034325598 | 0.972734235 | 0.986239529 |
| 227213_at   | 0.037790888 | 1.283260484 | 0.204455567 | 0.36755946  |
| 227214_at   | -0.0595064  | -1.27418456 | 0.207630981 | 0.371460062 |

|             |             |             |             |             |
|-------------|-------------|-------------|-------------|-------------|
| 227215_at   | 0.035964239 | 1.126840482 | 0.264405799 | 0.439336133 |
| 227216_at   | -0.39856518 | -6.92345468 | 3.77E-09    | 2.27E-07    |
| 227217_at   | -0.18950697 | -4.58037339 | 2.48E-05    | 0.000228976 |
| 227218_at   | -0.02707437 | -0.79255113 | 0.431238208 | 0.61209064  |
| 227219_x_at | -0.02993617 | -0.59384739 | 0.554901063 | 0.717187839 |
| 227220_at   | -0.03385395 | -0.75123484 | 0.455519466 | 0.634464923 |
| 227221_at   | -0.05412871 | -1.24197533 | 0.219196278 | 0.386025588 |
| 227222_at   | -0.0324149  | -1.23162147 | 0.223013002 | 0.390139629 |
| 227223_at   | 0.1510061   | 2.228963309 | 0.029666899 | 0.08434307  |
| 227224_at   | -0.19482131 | -4.43954932 | 4.05E-05    | 0.00034565  |
| 227225_at   | -0.0199689  | -0.58307839 | 0.5620791   | 0.723152832 |
| 227226_at   | -0.29757367 | -4.37432476 | 5.08E-05    | 0.000416952 |
| 227227_at   | 0.457863894 | 5.791119604 | 2.92E-07    | 5.85E-06    |
| 227228_s_at | -0.64184709 | -6.75018846 | 7.38E-09    | 3.61E-07    |
| 227229_at   | -0.09999829 | -2.46590789 | 0.016615478 | 0.052920391 |
| 227230_s_at | 0.023339368 | 0.354858718 | 0.723970136 | 0.838642682 |
| 227231_at   | 0.204924996 | 3.299757167 | 0.001650301 | 0.007767949 |
| 227232_at   | -0.06259793 | -1.49960078 | 0.139089492 | 0.278652841 |
| 227233_at   | -0.09178569 | -3.10096419 | 0.002965076 | 0.012713618 |
| 227234_at   | -0.23964707 | -4.41694809 | 4.38E-05    | 0.000368279 |
| 227235_at   | -0.98004779 | -7.06718528 | 2.16E-09    | 1.54E-07    |
| 227236_at   | -0.09171871 | -1.83126656 | 0.072148636 | 0.169567423 |
| 227237_x_at | -0.04555702 | -1.6248144  | 0.109572282 | 0.233246222 |
| 227238_at   | -0.02536305 | -1.07508492 | 0.286745916 | 0.464775269 |
| 227239_at   | 0.323176718 | 3.765740746 | 0.00038721  | 0.002307359 |
| 227240_at   | -1.27812884 | -7.26028018 | 1.02E-09    | 9.48E-08    |
| 227241_at   | -0.00743777 | -0.2491594  | 0.804109238 | 0.889671684 |
| 227242_s_at | 0.011188302 | 0.331849116 | 0.741187872 | 0.849839054 |
| 227243_s_at | -0.05350937 | -1.39975507 | 0.16686157  | 0.31816107  |
| 227244_s_at | -0.07202346 | -2.13379302 | 0.03705853  | 0.100657584 |
| 227245_at   | -0.18030614 | -4.17919813 | 9.89E-05    | 0.000729786 |
| 227246_at   | -0.06731838 | -1.06845754 | 0.289698414 | 0.467948587 |
| 227247_at   | 0.219304633 | 2.579816037 | 0.012415136 | 0.041602854 |
| 227248_at   | 0.041607116 | 1.613652295 | 0.111978639 | 0.237021046 |
| 227249_at   | 0.230379487 | 3.911096541 | 0.000241485 | 0.001549525 |
| 227250_at   | -0.23018993 | -4.31419795 | 6.24E-05    | 0.000495203 |
| 227251_at   | 0.008582379 | 0.223765426 | 0.823718567 | 0.902029554 |
| 227252_at   | 0.376222564 | 7.389734095 | 6.15E-10    | 6.66E-08    |
| 227253_at   | 0.885663403 | 4.51478509  | 3.12E-05    | 0.000276783 |
| 227254_at   | 0.325257118 | 6.187937689 | 6.45E-08    | 1.79E-06    |
| 227255_at   | 0.021460942 | 0.495534461 | 0.622077229 | 0.767774309 |
| 227256_at   | 0.232751038 | 2.02523801  | 0.047408557 | 0.122345724 |
| 227257_s_at | -0.09667096 | -2.2962873  | 0.025255139 | 0.074310531 |
| 227258_at   | -0.03235437 | -0.71874598 | 0.475155371 | 0.651100532 |
| 227259_at   | -0.09076628 | -0.63893622 | 0.525355486 | 0.693747508 |
| 227260_at   | -0.02110184 | -0.18571345 | 0.853311193 | 0.919588155 |
| 227261_at   | 0.271975537 | 4.3088235   | 6.36E-05    | 0.000502718 |
| 227262_at   | 0.021992547 | 0.820532465 | 0.41523991  | 0.597485578 |
| 227263_at   | 0.137418647 | 3.453749515 | 0.001033794 | 0.005240142 |
| 227264_at   | 0.129777042 | 3.655172109 | 0.000551174 | 0.003109452 |
| 227265_at   | 0.229026686 | 1.655387539 | 0.103195392 | 0.222871895 |
| 227266_s_at | 0.148574111 | 1.201229324 | 0.234497693 | 0.4033317   |
| 227267_at   | 0.012542125 | 0.431013503 | 0.668040832 | 0.799953795 |
| 227268_at   | -0.12022261 | -3.05917887 | 0.003344781 | 0.014078948 |
| 227269_s_at | 0.002986585 | 0.07647789  | 0.939299566 | 0.968323538 |
| 227270_at   | -0.17126618 | -2.6722122  | 0.009743978 | 0.03417657  |
| 227271_at   | 0.076405393 | 1.832240794 | 0.07200135  | 0.169335597 |
| 227272_at   | 0.218584588 | 5.188643515 | 2.77E-06    | 3.70E-05    |
| 227273_at   | 0.306932683 | 4.644335594 | 1.98E-05    | 0.000189205 |
| 227274_at   | 0.142537415 | 3.629964973 | 0.000596921 | 0.003322656 |
| 227275_at   | 0.008919509 | 0.274795141 | 0.784440699 | 0.876981782 |
| 227276_at   | 0.349259104 | 4.649531119 | 1.94E-05    | 0.00018624  |
| 227277_at   | -0.035089   | -0.72838884 | 0.469278089 | 0.646083291 |
| 227278_at   | 0.27511094  | 3.495760903 | 0.000908124 | 0.004705062 |
| 227279_at   | -0.00707319 | -0.16459012 | 0.869833363 | 0.929703843 |
| 227280_s_at | 0.012483681 | 0.383765073 | 0.702542275 | 0.824397924 |
| 227281_at   | 0.009673485 | 0.216530893 | 0.829326419 | 0.905309013 |
| 227282_at   | 0.050247136 | 0.814004701 | 0.418939641 | 0.601299069 |
| 227283_at   | -0.54470185 | -6.34203531 | 3.57E-08    | 1.14E-06    |
| 227284_at   | 0.243818056 | 5.339991954 | 1.59E-06    | 2.34E-05    |
| 227285_at   | -0.19118894 | -2.62642714 | 0.010994011 | 0.03763703  |
| 227286_at   | 0.122168752 | 3.209173346 | 0.002160876 | 0.009728404 |
| 227287_at   | 0.002839985 | 0.076286063 | 0.939451518 | 0.968333385 |
| 227288_at   | -0.10948527 | -2.08262465 | 0.041662165 | 0.110423762 |
| 227289_at   | -0.11475093 | -1.46728033 | 0.147649659 | 0.290976212 |

|             |             |             |             |             |
|-------------|-------------|-------------|-------------|-------------|
| 227290_at   | -0.39769712 | -5.14966679 | 3.20E-06    | 4.18E-05    |
| 227291_s_at | -0.5260902  | -5.70097006 | 4.11E-07    | 7.73E-06    |
| 227292_at   | 0.065363355 | 1.848244758 | 0.069617795 | 0.165067563 |
| 227293_at   | -0.0162469  | -0.42409541 | 0.673049958 | 0.803353062 |
| 227294_at   | -0.07916135 | -2.68504621 | 0.009417674 | 0.033253907 |
| 227295_at   | -0.3042589  | -6.77048008 | 6.82E-09    | 3.42E-07    |
| 227296_at   | -0.10883764 | -2.14834516 | 0.035833187 | 0.09805638  |
| 227297_at   | 0.029851928 | 0.807599305 | 0.422589288 | 0.604518291 |
| 227298_at   | 0.17414017  | 3.914872626 | 0.000238513 | 0.001532215 |
| 227299_at   | -0.07133386 | -1.62685328 | 0.109137296 | 0.232552876 |
| 227300_at   | 0.120855335 | 1.979460696 | 0.052470772 | 0.132472248 |
| 227301_at   | 0.053879079 | 1.582019137 | 0.119031101 | 0.248006431 |
| 227302_s_at | 0.02696669  | 0.977455373 | 0.332364135 | 0.514906335 |
| 227303_at   | 0.05967429  | 1.747561165 | 0.085781415 | 0.19378977  |
| 227304_at   | -0.01361229 | -0.37382457 | 0.709884748 | 0.829507454 |
| 227305_s_at | 0.084197487 | 1.931415282 | 0.058275492 | 0.143657334 |
| 227306_at   | 0.025386595 | 0.488962163 | 0.626694638 | 0.771470507 |
| 227307_at   | 0.006063035 | 0.152442146 | 0.879362185 | 0.935279742 |
| 227308_x_at | 0.220326669 | 5.974246947 | 1.46E-07    | 3.37E-06    |
| 227309_at   | 0.246666766 | 3.440537124 | 0.001076616 | 0.005415832 |
| 227310_at   | -0.05494148 | -1.48997948 | 0.141595744 | 0.282319742 |
| 227311_at   | -0.03300116 | -1.02069312 | 0.311597713 | 0.492546157 |
| 227312_at   | -0.0355082  | -0.50466885 | 0.615685091 | 0.763664303 |
| 227313_at   | 0.168035727 | 3.669000093 | 0.000527521 | 0.002998345 |
| 227314_at   | 0.258357464 | 2.932363942 | 0.004793364 | 0.019057469 |
| 227315_x_at | -0.01999454 | -0.63505629 | 0.527865079 | 0.695705654 |
| 227316_at   | -0.04906943 | -1.62238339 | 0.110092764 | 0.234097716 |
| 227317_at   | -0.07771748 | -1.60774087 | 0.113270257 | 0.239012007 |
| 227318_at   | -0.70029263 | -5.87597927 | 2.12E-07    | 4.52E-06    |
| 227319_at   | -0.01174336 | -0.31483792 | 0.754003695 | 0.858533951 |
| 227320_at   | -0.03605868 | -1.04347933 | 0.30101449  | 0.480477352 |
| 227321_at   | -0.10132788 | -1.60984879 | 0.112808313 | 0.238341092 |
| 227322_s_at | -0.18323475 | -3.54934964 | 0.000768805 | 0.00410066  |
| 227323_at   | -0.04396877 | -1.47819616 | 0.144713515 | 0.286745131 |
| 227324_at   | -0.00439148 | -0.11740346 | 0.906942049 | 0.950565279 |
| 227325_at   | 0.252582762 | 6.990346854 | 2.91E-09    | 1.87E-07    |
| 227326_at   | -0.46394085 | -7.0372324  | 2.42E-09    | 1.66E-07    |
| 227327_at   | -0.08629974 | -1.91800396 | 0.0599904   | 0.147054134 |
| 227328_at   | -0.02110177 | -0.73003964 | 0.468276085 | 0.64527888  |
| 227329_at   | -0.05113893 | -1.09913306 | 0.276207854 | 0.452622714 |
| 227330_x_at | 0.231229167 | 2.27873832  | 0.026345155 | 0.076844908 |
| 227331_at   | 0.012825287 | 0.546219489 | 0.586989935 | 0.741862852 |
| 227332_at   | 0.093359867 | 2.316732684 | 0.024035861 | 0.07147586  |
| 227333_at   | -0.00763146 | -0.27491467 | 0.784349314 | 0.876901552 |
| 227334_at   | 0.458251439 | 6.224333562 | 5.61E-08    | 1.61E-06    |
| 227335_at   | 0.027256012 | 0.561650499 | 0.576497251 | 0.733768551 |
| 227336_at   | 0.066329042 | 1.934775904 | 0.057852372 | 0.14291848  |
| 227337_at   | 0.060282522 | 0.505792026 | 0.614901154 | 0.763047685 |
| 227338_at   | 0.003942583 | 0.11031932  | 0.912533306 | 0.953749891 |
| 227339_at   | 0.103208973 | 2.59164798  | 0.012039392 | 0.040602513 |
| 227340_s_at | -0.26680739 | -3.57647344 | 0.000706293 | 0.003821967 |
| 227341_at   | 0.143374227 | 2.243889401 | 0.028633991 | 0.082048493 |
| 227342_s_at | 0.125192596 | 3.631097627 | 0.00059479  | 0.003312933 |
| 227343_at   | 0.047624873 | 0.982572726 | 0.329859544 | 0.512358208 |
| 227344_at   | -0.02380864 | -0.54016384 | 0.591132268 | 0.745075394 |
| 227345_at   | 0.181798516 | 3.689804291 | 0.000493755 | 0.002834175 |
| 227346_at   | 0.095438967 | 1.711690228 | 0.092245162 | 0.204779495 |
| 227347_x_at | -0.57190453 | -8.02937466 | 5.13E-11    | 1.42E-08    |
| 227348_at   | 0.005161604 | 0.154205385 | 0.87797796  | 0.934675653 |
| 227349_at   | -0.02962106 | -1.09450099 | 0.278216312 | 0.455003262 |
| 227350_at   | -0.01138412 | -0.43873662 | 0.662466693 | 0.796228524 |
| 227351_at   | -0.33743633 | -5.32558568 | 1.67E-06    | 2.45E-05    |
| 227352_at   | 0.079337184 | 2.626567757 | 0.010989958 | 0.03763126  |
| 227353_at   | 0.071670639 | 1.851804119 | 0.06909681  | 0.164137059 |
| 227354_at   | 0.054349241 | 1.211245375 | 0.230666229 | 0.398788257 |
| 227355_at   | -0.02722962 | -0.61622424 | 0.54013437  | 0.705735572 |
| 227356_at   | 0.104496724 | 1.640582509 | 0.106244579 | 0.227852758 |
| 227357_at   | -0.05057853 | -1.04142804 | 0.301957049 | 0.481588196 |
| 227358_at   | -0.01976091 | -0.59635439 | 0.55323665  | 0.715740407 |
| 227359_at   | -0.11722662 | -1.59682501 | 0.115686944 | 0.242918666 |
| 227360_at   | 0.017164536 | 0.4702959   | 0.639890325 | 0.781079993 |
| 227361_at   | 0.047446402 | 1.878255394 | 0.065327146 | 0.157238304 |
| 227362_at   | -0.00200034 | -0.07096197 | 0.943669788 | 0.970855038 |
| 227363_s_at | 0.120365183 | 2.801302599 | 0.006886549 | 0.025697056 |
| 227364_at   | -0.04552863 | -0.41262188 | 0.681390307 | 0.809460025 |

|             |             |             |             |             |
|-------------|-------------|-------------|-------------|-------------|
| 227365_at   | -0.34914081 | -5.68772486 | 4.32E-07    | 8.06E-06    |
| 227366_at   | -0.07295886 | -2.6755526  | 0.009658068 | 0.033933834 |
| 227367_at   | 0.36112321  | 5.153441097 | 3.15E-06    | 4.13E-05    |
| 227368_at   | -0.10965301 | -2.43884408 | 0.017785357 | 0.055988107 |
| 227369_at   | 0.198963402 | 4.321144087 | 6.09E-05    | 0.000485435 |
| 227370_at   | -0.01318831 | -0.15595089 | 0.876608035 | 0.933861706 |
| 227371_at   | -0.05098791 | -1.32597649 | 0.189995911 | 0.348775867 |
| 227372_s_at | -0.01987287 | -0.45232834 | 0.652703483 | 0.789440721 |
| 227373_at   | 0.082997727 | 1.576248245 | 0.120355425 | 0.250077859 |
| 227374_at   | -0.21891934 | -3.72787215 | 0.000437248 | 0.002555777 |
| 227375_at   | -0.07975802 | -1.59939536 | 0.115114176 | 0.242000225 |
| 227376_at   | 0.431786283 | 6.120901903 | 8.34E-08    | 2.19E-06    |
| 227377_at   | -0.05176811 | -1.5121881  | 0.135863677 | 0.27387215  |
| 227378_x_at | -0.27898398 | -5.73547759 | 3.61E-07    | 6.95E-06    |
| 227379_at   | 0.072848552 | 2.086607159 | 0.041286821 | 0.109604432 |
| 227380_x_at | 0.01691156  | 0.753134776 | 0.45438584  | 0.63353753  |
| 227381_at   | 0.013385932 | 0.478417698 | 0.634134106 | 0.776905109 |
| 227382_at   | -0.30359379 | -5.73717374 | 3.59E-07    | 6.92E-06    |
| 227383_at   | 0.410737936 | 6.684884723 | 9.50E-09    | 4.31E-07    |
| 227384_s_at | 0.672600731 | 8.269968288 | 2.02E-11    | 8.58E-09    |
| 227385_at   | -0.15754155 | -2.56114133 | 0.013029899 | 0.043276771 |
| 227386_s_at | -0.63547426 | -9.22425985 | 5.18E-13    | 2.04E-09    |
| 227387_at   | -0.02455853 | -0.82327068 | 0.413693887 | 0.595913338 |
| 227388_at   | -0.01035225 | -0.15764664 | 0.875277517 | 0.933023364 |
| 227389_x_at | -0.02922434 | -0.96157645 | 0.340215778 | 0.523063179 |
| 227390_at   | -0.1383754  | -2.53660105 | 0.013879718 | 0.045581037 |
| 227391_x_at | 0.241272608 | 4.811229104 | 1.09E-05    | 0.000114658 |
| 227392_at   | 0.013664711 | 0.442029575 | 0.660095804 | 0.794534051 |
| 227393_at   | 0.030474902 | 1.093650969 | 0.278585985 | 0.455447342 |
| 227394_at   | 0.017854206 | 0.37044344  | 0.712388546 | 0.831085878 |
| 227395_at   | 0.220751578 | 3.426471108 | 0.00112405  | 0.005614223 |
| 227396_at   | 0.080905415 | 1.213338156 | 0.229871469 | 0.397778128 |
| 227397_at   | 0.073301827 | 2.536513912 | 0.013882823 | 0.045587205 |
| 227398_s_at | -0.03649999 | -0.90698134 | 0.368133379 | 0.55128726  |
| 227399_at   | -0.14432881 | -3.07899743 | 0.003159353 | 0.013410371 |
| 227400_at   | 0.534381677 | 8.036842454 | 4.98E-11    | 1.42E-08    |
| 227401_at   | 0.306652937 | 4.362030701 | 5.30E-05    | 0.000432782 |
| 227402_s_at | 0.030163044 | 0.822081256 | 0.414365019 | 0.596595021 |
| 227403_at   | -0.0888335  | -2.01171307 | 0.04885844  | 0.125191    |
| 227404_s_at | -0.9929079  | -5.11059124 | 3.69E-06    | 4.70E-05    |
| 227405_s_at | 0.113438062 | 2.194678265 | 0.032164775 | 0.09009201  |
| 227406_at   | 0.090399979 | 2.273991626 | 0.026647062 | 0.077492873 |
| 227407_at   | 0.349813865 | 5.627245198 | 5.42E-07    | 9.67E-06    |
| 227408_s_at | -0.33835532 | -5.14195048 | 3.29E-06    | 4.26E-05    |
| 227409_at   | 0.080083569 | 1.685063494 | 0.097298359 | 0.213143611 |
| 227410_at   | 0.114909216 | 2.465077988 | 0.016650296 | 0.053004845 |
| 227411_at   | 0.034115688 | 1.22167863  | 0.226723917 | 0.394224227 |
| 227412_at   | 0.027768404 | 0.699992877 | 0.486703081 | 0.66120471  |
| 227413_at   | -0.16652542 | -1.80799183 | 0.075743266 | 0.175969124 |
| 227414_at   | 0.07458236  | 1.823030466 | 0.073403917 | 0.171773015 |
| 227415_at   | -1.08190256 | -6.57891626 | 1.43E-08    | 5.83E-07    |
| 227416_s_at | -0.03277654 | -0.61206493 | 0.542863811 | 0.707564217 |
| 227417_at   | 0.269426506 | 3.563342688 | 0.000735925 | 0.003959306 |
| 227418_at   | 0.163856146 | 2.948154157 | 0.004585581 | 0.018370275 |
| 227419_x_at | 0.132111797 | 3.137994225 | 0.002662675 | 0.011610914 |
| 227420_at   | 0.059467886 | 1.446939702 | 0.153245254 | 0.298801837 |
| 227421_at   | 0.031989581 | 0.663552245 | 0.509580577 | 0.680496464 |
| 227422_at   | -0.31191853 | -3.37025476 | 0.001334145 | 0.006492337 |
| 227423_at   | 0.022151584 | 0.738047375 | 0.463432816 | 0.641329599 |
| 227424_x_at | -0.00739489 | -0.2183774  | 0.827894234 | 0.904431298 |
| 227425_at   | -0.80821468 | -6.70719571 | 8.72E-09    | 4.06E-07    |
| 227426_at   | 0.286244523 | 4.858126837 | 9.22E-06    | 9.99E-05    |
| 227427_at   | -0.04465582 | -1.10743921 | 0.272631762 | 0.448650811 |
| 227428_at   | -0.0277827  | -0.44777822 | 0.655965243 | 0.79175733  |
| 227429_at   | 0.00043041  | 0.013986403 | 0.988888366 | 0.994831713 |
| 227430_at   | 0.120518292 | 3.491197022 | 0.000921038 | 0.004758733 |
| 227431_at   | 0.025539387 | 0.566640845 | 0.573123465 | 0.73116105  |
| 227432_s_at | 0.240416016 | 2.657306645 | 0.010135903 | 0.035260665 |
| 227433_at   | 0.042311958 | 1.016172501 | 0.313726917 | 0.494832658 |
| 227434_at   | -0.56152982 | -6.15468028 | 7.33E-08    | 1.98E-06    |
| 227435_at   | 0.090936996 | 1.865095184 | 0.067180339 | 0.160669113 |
| 227436_at   | 0.320342243 | 6.333151592 | 3.69E-08    | 1.17E-06    |
| 227437_at   | 0.053950066 | 1.547102737 | 0.127225556 | 0.260990677 |
| 227438_at   | 0.072727211 | 1.81666287  | 0.074386931 | 0.173539736 |
| 227439_at   | -0.24980782 | -3.95256045 | 0.000210717 | 0.00137659  |

|             |             |             |             |             |
|-------------|-------------|-------------|-------------|-------------|
| 227440_at   | -0.33889979 | -4.17080626 | 0.000101702 | 0.000747822 |
| 227441_s_at | -0.61779116 | -4.97989899 | 5.94E-06    | 6.93E-05    |
| 227442_at   | -0.16441503 | -3.66179313 | 0.000539725 | 0.003055663 |
| 227443_at   | 0.142293878 | 1.540855306 | 0.128738183 | 0.263236806 |
| 227444_at   | -0.44611282 | -4.68849127 | 1.69E-05    | 0.000165355 |
| 227445_at   | -0.07900815 | -2.27535806 | 0.026559839 | 0.077299579 |
| 227446_s_at | 0.144632527 | 3.139473606 | 0.002651216 | 0.011568847 |
| 227447_at   | -0.02145827 | -0.32748158 | 0.744471413 | 0.852011891 |
| 227448_at   | -0.54860046 | -6.1133798  | 8.58E-08    | 2.24E-06    |
| 227449_at   | -0.60232782 | -4.93994116 | 6.86E-06    | 7.84E-05    |
| 227450_at   | -0.02372854 | -0.56795348 | 0.572237642 | 0.730531441 |
| 227451_s_at | 0.018781256 | 0.279180204 | 0.781090054 | 0.874943022 |
| 227452_at   | 0.102999541 | 1.892035446 | 0.063433198 | 0.153599102 |
| 227453_at   | -0.72085573 | -7.76784925 | 1.41E-10    | 2.62E-08    |
| 227454_at   | 0.247414832 | 3.745371921 | 0.0004134   | 0.002439031 |
| 227455_at   | -0.29561406 | -3.89029909 | 0.000258502 | 0.001639184 |
| 227456_s_at | -0.15544682 | -3.49249074 | 0.00091736  | 0.004743481 |
| 227457_at   | -0.00516614 | -0.13753043 | 0.891083281 | 0.941739831 |
| 227458_at   | -0.0621355  | -1.42294291 | 0.160057797 | 0.30841179  |
| 227459_at   | -0.02085481 | -0.65114608 | 0.517499015 | 0.687128383 |
| 227460_at   | -0.05796474 | -1.44357483 | 0.154186659 | 0.300087539 |
| 227461_at   | 0.685907011 | 7.27749756  | 9.52E-10    | 9.15E-08    |
| 227462_at   | 0.021813571 | 0.42154091  | 0.674903357 | 0.804684154 |
| 227463_at   | -0.23876325 | -5.81610031 | 2.66E-07    | 5.41E-06    |
| 227464_at   | 0.053716301 | 1.838271541 | 0.071095228 | 0.167618536 |
| 227465_at   | 0.105587882 | 2.454516406 | 0.017099178 | 0.054236798 |
| 227466_at   | 0.023277997 | 0.406864488 | 0.685590655 | 0.812264865 |
| 227467_at   | -0.026395   | -0.76674259 | 0.446314369 | 0.626269444 |
| 227468_at   | -0.36280897 | -4.85430803 | 9.35E-06    | 0.000101035 |
| 227469_at   | 0.017899684 | 0.592979861 | 0.555477604 | 0.717766937 |
| 227470_at   | -0.02639815 | -1.01609112 | 0.313765339 | 0.494843061 |
| 227471_at   | -0.53287563 | -6.16528045 | 7.03E-08    | 1.92E-06    |
| 227472_at   | -0.01820674 | -0.60002675 | 0.550803084 | 0.713645604 |
| 227473_at   | -0.03762066 | -0.45099614 | 0.653657769 | 0.790079508 |
| 227474_at   | 0.082743497 | 1.508808484 | 0.136723912 | 0.275122246 |
| 227475_at   | 0.252984616 | 2.605880032 | 0.011601141 | 0.039380084 |
| 227476_at   | -0.38717104 | -4.19692027 | 9.31E-05    | 0.000693359 |
| 227477_at   | -0.16472483 | -3.87919964 | 0.00026805  | 0.001689421 |
| 227478_at   | -0.00585967 | -0.13155066 | 0.895790593 | 0.94414182  |
| 227479_at   | -0.20769426 | -5.26177355 | 2.12E-06    | 2.97E-05    |
| 227480_at   | 0.085465992 | 1.999634324 | 0.050185405 | 0.127814344 |
| 227481_at   | 0.078956214 | 0.876331443 | 0.384430186 | 0.567055784 |
| 227482_at   | 0.041883256 | 1.324598461 | 0.190449998 | 0.349328381 |
| 227483_s_at | -0.01886791 | -0.34550247 | 0.730954586 | 0.843086097 |
| 227484_at   | 0.109676381 | 2.058482068 | 0.044001577 | 0.115396553 |
| 227485_at   | 0.132007367 | 2.736309516 | 0.008211626 | 0.029725742 |
| 227486_at   | 0.055920664 | 1.59723797  | 0.115594766 | 0.242786914 |
| 227487_s_at | 0.064204109 | 1.610531737 | 0.112658973 | 0.238127177 |
| 227488_at   | -0.04047177 | -0.98101128 | 0.330622431 | 0.513061725 |
| 227489_at   | 0.12871292  | 3.395627807 | 0.00123509  | 0.006084505 |
| 227490_at   | 0.105698782 | 3.518749264 | 0.000845648 | 0.004431198 |
| 227491_at   | -0.19332017 | -4.09257925 | 0.000132324 | 0.000934103 |
| 227492_at   | 0.180731614 | 2.205749651 | 0.031338655 | 0.088175973 |
| 227493_s_at | -0.04603838 | -1.52339807 | 0.13304099  | 0.269727269 |
| 227494_at   | 0.009238859 | 0.270984099 | 0.787356068 | 0.878663537 |
| 227496_at   | -0.06184707 | -1.92194822 | 0.059481647 | 0.146015257 |
| 227497_at   | 0.324538989 | 5.450183643 | 1.05E-06    | 1.66E-05    |
| 227498_at   | 0.441627063 | 6.188113818 | 6.45E-08    | 1.79E-06    |
| 227499_at   | -0.21203439 | -2.20685499 | 0.031257211 | 0.087987473 |
| 227500_at   | -0.28901086 | -4.67703336 | 1.76E-05    | 0.000171165 |
| 227501_at   | 0.298860502 | 3.639178865 | 0.000579794 | 0.003247953 |
| 227502_at   | -0.05843779 | -1.03961017 | 0.302794032 | 0.48245823  |
| 227503_at   | 0.280615203 | 4.535931369 | 2.89E-05    | 0.000260247 |
| 227504_s_at | 0.238052676 | 5.238479362 | 2.31E-06    | 3.19E-05    |
| 227505_at   | 0.128598802 | 3.58078397  | 0.000696815 | 0.003779836 |
| 227506_at   | 0.978753138 | 7.950199427 | 6.97E-11    | 1.73E-08    |
| 227507_at   | 0.082675024 | 2.924817993 | 0.004895716 | 0.019387739 |
| 227508_at   | -0.02837314 | -0.61427119 | 0.541415131 | 0.706584984 |
| 227509_x_at | 0.066796186 | 2.232752802 | 0.029401594 | 0.083764044 |
| 227510_x_at | -0.07701872 | -0.81992552 | 0.415583072 | 0.59780613  |
| 227511_at   | -0.00885619 | -0.22137836 | 0.825567894 | 0.903209331 |
| 227512_at   | 0.006559998 | 0.148611207 | 0.882370949 | 0.93705262  |
| 227513_s_at | -0.01515642 | -0.47934004 | 0.633481835 | 0.77644654  |
| 227514_at   | 0.327911501 | 4.901447232 | 7.89E-06    | 8.76E-05    |
| 227515_at   | 0.152993499 | 4.21487434  | 8.76E-05    | 0.00065854  |

|             |             |             |             |             |
|-------------|-------------|-------------|-------------|-------------|
| 227516_at   | -0.25081823 | -5.01929429 | 5.15E-06    | 6.16E-05    |
| 227517_s_at | -0.0169485  | -0.21848806 | 0.827808429 | 0.904419762 |
| 227518_at   | -0.08500449 | -1.96553844 | 0.054099511 | 0.135710351 |
| 227519_at   | -0.00445357 | -0.13344599 | 0.894298162 | 0.943575557 |
| 227520_at   | 0.042618592 | 0.978542045 | 0.331831233 | 0.514341436 |
| 227521_at   | -0.13887934 | -2.72912095 | 0.008371742 | 0.030187987 |
| 227522_at   | 0.081789525 | 1.169103016 | 0.247098544 | 0.418863194 |
| 227523_s_at | 0.005088954 | 0.141058465 | 0.888307823 | 0.940051459 |
| 227524_at   | -0.19005977 | -3.54500038 | 0.000779306 | 0.004145294 |
| 227525_at   | -0.4534908  | -5.41651409 | 1.19E-06    | 1.84E-05    |
| 227526_at   | 0.041999514 | 1.34070413  | 0.185193836 | 0.342733981 |
| 227527_at   | 0.098181607 | 1.601011469 | 0.114755222 | 0.241438678 |
| 227528_s_at | 0.050986672 | 1.030295757 | 0.307107387 | 0.48729828  |
| 227529_s_at | -0.33698385 | -3.81803167 | 0.000327057 | 0.00200066  |
| 227530_at   | -0.23878221 | -3.96409412 | 0.000202853 | 0.001332244 |
| 227531_at   | -0.10881445 | -1.55834773 | 0.124538694 | 0.256871114 |
| 227532_at   | -0.13938959 | -4.32127492 | 6.09E-05    | 0.000485304 |
| 227533_at   | -0.4195164  | -5.82671855 | 2.56E-07    | 5.26E-06    |
| 227534_at   | 0.024830073 | 0.510112574 | 0.611889771 | 0.760566669 |
| 227535_at   | -0.07911793 | -2.33478714 | 0.023002993 | 0.068978111 |
| 227536_at   | 0.000161136 | 0.003208483 | 0.997450909 | 0.998747055 |
| 227537_s_at | 0.002521618 | 0.065554349 | 0.947955895 | 0.973379399 |
| 227538_at   | 0.100699958 | 3.30380081  | 0.001630403 | 0.007688717 |
| 227539_at   | 0.692223302 | 5.745692179 | 3.47E-07    | 6.74E-06    |
| 227540_at   | -0.05517099 | -1.62571877 | 0.109379165 | 0.232946087 |
| 227541_at   | -0.03322344 | -0.7991531  | 0.427430839 | 0.608658246 |
| 227542_at   | 0.112614547 | 1.777796251 | 0.080629015 | 0.184802909 |
| 227543_at   | 0.162937483 | 3.589902451 | 0.000677165 | 0.003692066 |
| 227544_at   | -0.15466724 | -3.89874739 | 0.000251455 | 0.001601658 |
| 227545_at   | 0.172254869 | 2.935206967 | 0.004755319 | 0.018924175 |
| 227546_x_at | 0.058192179 | 1.409635501 | 0.163935667 | 0.314006595 |
| 227547_at   | 0.193992771 | 3.501965127 | 0.000890843 | 0.004631639 |
| 227548_at   | -0.08242687 | -0.79446659 | 0.43013149  | 0.611004913 |
| 227549_x_at | -0.05020467 | -1.80923549 | 0.075547469 | 0.175623796 |
| 227550_at   | -0.14145701 | -2.00861375 | 0.049196016 | 0.125865089 |
| 227551_at   | 0.294845022 | 3.43103969  | 0.00110843  | 0.005548608 |
| 227552_at   | -0.07090129 | -2.11098743 | 0.039052466 | 0.104799984 |
| 227553_at   | -0.02339639 | -0.62152246 | 0.536667777 | 0.702891196 |
| 227554_at   | 0.201601763 | 3.020865571 | 0.0037324   | 0.015468142 |
| 227555_s_at | -0.04309102 | -1.1646352  | 0.248888785 | 0.421254316 |
| 227556_at   | -0.32762301 | -2.27286812 | 0.026718968 | 0.077646408 |
| 227557_at   | -0.06347103 | -1.36821675 | 0.176470672 | 0.331198018 |
| 227558_at   | -0.11573107 | -1.45522789 | 0.150945559 | 0.29565933  |
| 227559_at   | -0.42201021 | -5.31423566 | 1.74E-06    | 2.53E-05    |
| 227560_at   | 0.059625054 | 1.529180162 | 0.131603362 | 0.267558446 |
| 227561_at   | 0.586805653 | 6.107278824 | 8.78E-08    | 2.28E-06    |
| 227562_at   | -0.23152801 | -3.19058582 | 0.002282567 | 0.010183638 |
| 227563_at   | -0.05081477 | -1.1393772  | 0.259184591 | 0.433226795 |
| 227564_at   | -0.05836974 | -1.34977575 | 0.182282126 | 0.339100599 |
| 227565_at   | 0.499504285 | 5.304422252 | 1.81E-06    | 2.61E-05    |
| 227566_at   | 0.07765865  | 1.343192435 | 0.184391676 | 0.341659734 |
| 227567_at   | 0.363338724 | 5.453232278 | 1.04E-06    | 1.65E-05    |
| 227568_at   | -0.23552604 | -3.80531482 | 0.000340802 | 0.002070288 |
| 227569_at   | 0.012681401 | 0.500300409 | 0.618738385 | 0.765959113 |
| 227570_at   | -0.02378129 | -0.72188904 | 0.473235149 | 0.649268732 |
| 227571_at   | 0.01884182  | 0.480953294 | 0.632341655 | 0.775687241 |
| 227572_at   | 0.117092924 | 2.306980539 | 0.024610754 | 0.072797922 |
| 227573_s_at | 0.064523088 | 1.427185052 | 0.158836676 | 0.306693542 |
| 227574_at   | 0.107297258 | 2.084948133 | 0.041442823 | 0.109933679 |
| 227575_s_at | 0.133329609 | 2.74136548  | 0.0081007   | 0.029388465 |
| 227576_at   | 0.112468619 | 2.139924505 | 0.036537844 | 0.099588298 |
| 227577_at   | -0.25789195 | -2.81479958 | 0.006637356 | 0.024912799 |
| 227578_at   | -0.0025387  | -0.04892892 | 0.961142422 | 0.980188777 |
| 227579_at   | 0.117333834 | 2.89391779  | 0.005336354 | 0.020793748 |
| 227580_s_at | -0.13143169 | -2.97654721 | 0.004232864 | 0.017191492 |
| 227581_at   | -0.05619121 | -1.78584534 | 0.079301645 | 0.182360374 |
| 227582_at   | -0.12841042 | -3.15592982 | 0.00252683  | 0.011099774 |
| 227583_at   | 0.026559319 | 0.900456643 | 0.371565152 | 0.554771984 |
| 227584_at   | 0.131482545 | 2.702420016 | 0.008991867 | 0.032008326 |
| 227585_at   | -0.38326275 | -4.59686411 | 2.34E-05    | 0.000217462 |
| 227586_at   | 0.417371979 | 6.104108007 | 8.89E-08    | 2.30E-06    |
| 227587_at   | 0.116172436 | 3.059749086 | 0.003339307 | 0.014062027 |
| 227588_s_at | 0.003972524 | 0.114011358 | 0.909618741 | 0.952321045 |
| 227589_at   | -0.04533833 | -1.22881795 | 0.224054804 | 0.3912049   |
| 227590_at   | 0.084464594 | 2.763857772 | 0.007623709 | 0.027934638 |

|             |             |             |             |             |
|-------------|-------------|-------------|-------------|-------------|
| 227591_at   | 0.031086082 | 1.043935801 | 0.300805017 | 0.480281088 |
| 227592_at   | 0.089114823 | 2.372574171 | 0.02096832  | 0.063997551 |
| 227593_at   | 0.25306807  | 4.745249567 | 1.38E-05    | 0.000139592 |
| 227594_at   | -0.2345726  | -4.15912074 | 0.000105796 | 0.00077271  |
| 227595_at   | -0.07071131 | -1.96948468 | 0.053633509 | 0.134707699 |
| 227596_at   | 0.012037525 | 0.316914634 | 0.752435333 | 0.857455749 |
| 227597_at   | 0.028321141 | 0.833493044 | 0.407953203 | 0.590173973 |
| 227598_at   | 0.004135827 | 0.13545234  | 0.892718728 | 0.942576672 |
| 227599_at   | -0.00858345 | -0.28486222 | 0.776754601 | 0.872040003 |
| 227600_at   | -0.07830552 | -1.8472349  | 0.06976621  | 0.165305454 |
| 227601_at   | 0.211122358 | 3.885234286 | 0.000262817 | 0.001662304 |
| 227602_at   | -0.0901412  | -2.78589766 | 0.007181488 | 0.026593342 |
| 227603_at   | 0.080565119 | 1.834029215 | 0.071731633 | 0.168816752 |
| 227604_at   | 0.002803016 | 0.089378121 | 0.929086362 | 0.963011186 |
| 227605_at   | 0.057185697 | 0.948279515 | 0.346883761 | 0.529887858 |
| 227606_s_at | -0.04569297 | -0.72532402 | 0.471141603 | 0.647574344 |
| 227607_at   | 0.071425142 | 0.784965482 | 0.435637684 | 0.616221534 |
| 227608_at   | -0.05294249 | -1.40951725 | 0.163970449 | 0.31405534  |
| 227609_at   | -0.02773479 | -0.58745004 | 0.559159647 | 0.720795008 |
| 227610_at   | 0.076301632 | 2.072548418 | 0.04262509  | 0.112449118 |
| 227611_at   | 0.048656045 | 0.648110105 | 0.519446679 | 0.688710748 |
| 227612_at   | -0.06291378 | -0.95792946 | 0.342036187 | 0.524971361 |
| 227613_at   | -0.18560896 | -3.10948896 | 0.002892738 | 0.012445345 |
| 227614_at   | 0.052053301 | 1.083252539 | 0.283136002 | 0.460510654 |
| 227615_at   | -0.04302486 | -1.3348701  | 0.187084943 | 0.345065871 |
| 227616_at   | 0.072049507 | 2.714493018 | 0.008706439 | 0.031168548 |
| 227617_at   | 0.011571822 | 0.372199886 | 0.711087463 | 0.830304922 |
| 227618_at   | -0.62055081 | -7.14810723 | 1.57E-09    | 1.25E-07    |
| 227619_at   | -0.03994008 | -1.36863725 | 0.176339827 | 0.331028814 |
| 227620_at   | 0.565457614 | 5.07950484  | 4.13E-06    | 5.15E-05    |
| 227621_at   | 0.138191937 | 1.504531662 | 0.137818694 | 0.276776896 |
| 227622_at   | 0.065116942 | 1.365899299 | 0.17719311  | 0.332219427 |
| 227623_at   | -0.68966555 | -5.44800025 | 1.06E-06    | 1.67E-05    |
| 227624_at   | 0.214501486 | 3.746068777 | 0.000412476 | 0.002434868 |
| 227625_s_at | -0.03409912 | -0.90481509 | 0.369270504 | 0.552471792 |
| 227626_at   | 0.303620093 | 3.85560951  | 0.000289481 | 0.001806659 |
| 227627_at   | 0.009517157 | 0.178775276 | 0.85873117  | 0.923009301 |
| 227628_at   | 0.030406856 | 0.639625988 | 0.524909988 | 0.693384482 |
| 227629_at   | -0.32450087 | -3.07971519 | 0.003152821 | 0.013391549 |
| 227630_at   | -0.13229527 | -2.30578589 | 0.024682012 | 0.072950763 |
| 227631_at   | -0.00369923 | -0.10460346 | 0.917047885 | 0.955974545 |
| 227632_at   | 0.006745115 | 0.104940795 | 0.916781368 | 0.955822194 |
| 227633_at   | 0.045572861 | 1.495023546 | 0.140277412 | 0.280441875 |
| 227634_at   | -0.29703187 | -6.28934165 | 4.37E-08    | 1.33E-06    |
| 227635_at   | 0.019777598 | 0.614282028 | 0.541408019 | 0.706584984 |
| 227636_at   | 0.165315523 | 2.059300437 | 0.043920452 | 0.115236672 |
| 227637_at   | -0.04748849 | -1.29535224 | 0.200281479 | 0.362182563 |
| 227638_at   | 0.037188899 | 0.78805686  | 0.433841569 | 0.614595138 |
| 227639_at   | -0.13936741 | -2.26868997 | 0.026987885 | 0.078224435 |
| 227640_s_at | 0.049677873 | 1.250676355 | 0.216026215 | 0.382029265 |
| 227641_at   | -0.93473968 | -7.02130798 | 2.58E-09    | 1.73E-07    |
| 227642_at   | 0.21725236  | 4.023587091 | 0.000166577 | 0.001128151 |
| 227643_at   | 0.052428585 | 1.734282933 | 0.088128929 | 0.197813667 |
| 227644_at   | -0.32940324 | -4.53709704 | 2.88E-05    | 0.0002595   |
| 227645_at   | 0.109771537 | 2.662095458 | 0.010008444 | 0.03492746  |
| 227646_at   | 0.023550785 | 0.351261072 | 0.726653032 | 0.840406445 |
| 227647_at   | 0.094355508 | 2.403145564 | 0.019441543 | 0.060255301 |
| 227648_at   | -0.03963009 | -1.09021824 | 0.280082359 | 0.457241408 |
| 227649_s_at | -0.02025716 | -0.63660145 | 0.526864896 | 0.694976954 |
| 227650_at   | -0.11991698 | -2.42615361 | 0.018359006 | 0.057478157 |
| 227651_at   | -0.09641544 | -1.93299828 | 0.058075857 | 0.143296317 |
| 227652_at   | -0.13494558 | -3.56138104 | 0.000740452 | 0.003978873 |
| 227653_at   | 0.001996056 | 0.043950043 | 0.965093732 | 0.982191763 |
| 227654_at   | 0.165754054 | 2.987886624 | 0.004099185 | 0.016736778 |
| 227655_at   | 0.070373547 | 1.923169773 | 0.05932483  | 0.145710337 |
| 227656_at   | 0.189868404 | 3.616250595 | 0.000623311 | 0.003448075 |
| 227657_at   | -0.6031414  | -6.17593837 | 6.75E-08    | 1.86E-06    |
| 227658_s_at | -0.14711769 | -3.15404064 | 0.002540826 | 0.011150296 |
| 227659_at   | 0.01136784  | 0.351339755 | 0.726594319 | 0.840375593 |
| 227660_at   | 0.014852417 | 0.373855801 | 0.709861637 | 0.829507454 |
| 227661_at   | -0.00939346 | -0.21973459 | 0.826841953 | 0.903931055 |
| 227662_at   | 0.875791332 | 5.945377952 | 1.63E-07    | 3.68E-06    |
| 227663_at   | 0.606345676 | 4.553210763 | 2.72E-05    | 0.000247643 |
| 227664_at   | 0.079272959 | 2.179140179 | 0.033356451 | 0.092651742 |
| 227665_at   | -0.03627752 | -0.70785737 | 0.481841464 | 0.657019121 |



|             |             |             |             |              |
|-------------|-------------|-------------|-------------|--------------|
| 227666_at   | 0.019616577 | 0.406429685 | 0.685908276 | 0.812451968  |
| 227667_at   | 0.149405326 | 2.895457001 | 0.005313562 | 0.020720158  |
| 227668_at   | 0.068605117 | 2.362247652 | 0.021507753 | 0.065340527  |
| 227669_at   | -0.69831116 | -6.8830541  | 4.41E-09    | 2.54E-07     |
| 227670_at   | -0.09212613 | -1.51551782 | 0.135020337 | 0.272676407  |
| 227671_at   | 0.015336848 | 0.066587058 | 0.947137242 | 0.972822615  |
| 227672_at   | 0.065209403 | 2.174069709 | 0.033753624 | 0.093562557  |
| 227673_at   | 0.018746613 | 0.521153788 | 0.604224738 | 0.754718179  |
| 227674_at   | 0.023840813 | 0.557607056 | 0.5792379   | 0.735902211  |
| 227675_at   | 0.006122016 | 0.192814175 | 0.847771582 | 0.916324921  |
| 227676_at   | -0.03735014 | -1.23757847 | 0.220811168 | 0.387703233  |
| 227677_at   | 0.088493486 | 1.698094885 | 0.094797596 | 0.208992412  |
| 227678_at   | -0.17383831 | -3.54251392 | 0.000785371 | 0.004168623  |
| 227679_at   | 0.236475472 | 4.064906285 | 0.000145156 | 0.001006661  |
| 227680_at   | 0.407738237 | 4.840505915 | 9.82E-06    | 0.000105278  |
| 227681_at   | 0.044528949 | 1.098602849 | 0.276437236 | 0.452862173  |
| 227682_at   | 0.425432196 | 4.778197924 | 1.23E-05    | 0.000126363  |
| 227683_x_at | -0.04816997 | -1.52923165 | 0.131590617 | 0.267551424  |
| 227684_at   | -0.05363101 | -1.21617003 | 0.228799214 | 0.396429188  |
| 227685_at   | 0.124314093 | 2.207634381 | 0.031199896 | 0.087867076  |
| 227686_at   | -0.1333198  | -4.614493   | 2.20E-05    | 0.000206645  |
| 227687_at   | -0.27944963 | -6.56136183 | 1.53E-08    | 6.12E-07     |
| 227688_at   | -0.10486031 | -2.07918389 | 0.041988832 | 0.111144568  |
| 227689_at   | 0.169189643 | 2.854984728 | 0.005943823 | 0.0227277    |
| 227690_at   | -1.1021034  | -6.54052368 | 1.66E-08    | 6.47E-07     |
| 227691_at   | -0.00844605 | -0.22848056 | 0.820068574 | 0.899818436  |
| 227692_at   | 0.275645874 | 2.565014234 | 0.01290018  | 0.042935271  |
| 227693_at   | 0.229972186 | 2.972944448 | 0.004276179 | 0.017343769  |
| 227694_at   | 0.042097056 | 1.135158316 | 0.260933404 | 0.435249344  |
| 227695_at   | 0.01746943  | 0.632161224 | 0.529741729 | 0.697159955  |
| 227696_at   | -0.43628475 | -5.0455261  | 4.68E-06    | 5.71E-05     |
| 227697_at   | 0.401620785 | 1.658215012 | 0.102621251 | 0.221980473  |
| 227698_s_at | -0.47176568 | -6.69631309 | 9.09E-09    | 4.18E-07     |
| 227699_at   | 0.131440041 | 2.582955972 | 0.012314397 | 0.041327572  |
| 227700_x_at | 0.029022509 | 1.188569963 | 0.239406188 | 0.409285493  |
| 227701_at   | 0.090615051 | 1.826306105 | 0.072902492 | 0.170870473  |
| 227702_at   | -0.42900502 | -4.53539493 | 2.90E-05    | 0.000260632  |
| 227703_s_at | 0.898691401 | 5.316873163 | 1.73E-06    | 2.52E-05     |
| 227704_at   | -0.25432704 | -5.85776736 | 2.27E-07    | 4.76E-06     |
| 227705_at   | -0.3084675  | -2.29752447 | 0.025179827 | 0.074145138  |
| 227706_at   | -0.00616318 | -0.17201615 | 0.864017857 | 0.926255993  |
| 227707_at   | -0.02374991 | -0.63201953 | 0.529833668 | 0.69718143   |
| 227708_at   | -0.08558492 | -1.1396567  | 0.259069026 | 0.433133851  |
| 227709_at   | -0.00523627 | -0.08081366 | 0.935865676 | 0.966652402  |
| 227710_s_at | -0.00566013 | -0.11438137 | 0.909326715 | 0.95208222   |
| 227711_at   | -0.06036159 | -1.64634658 | 0.105048831 | 0.22601783   |
| 227712_at   | 0.116819568 | 3.280523515 | 0.001748126 | 0.008149291  |
| 227713_at   | 0.251110621 | 4.51406181  | 3.12E-05    | 0.000277263  |
| 227714_s_at | 0.028972506 | 0.732123192 | 0.467013142 | 0.644335232  |
| 227715_at   | 0.049469412 | 1.347931056 | 0.182871377 | 0.339729172  |
| 227716_at   | -0.10836154 | -2.4458233  | 0.017476787 | 0.055212521  |
| 227717_at   | 0.324739832 | 4.097274066 | 0.000130258 | 0.000922291  |
| 227718_at   | 0.004979548 | 0.122649684 | 0.902804421 | 0.948319157  |
| 227719_at   | 0.73024695  | 4.823713418 | 1.04E-05    | 0.000110529  |
| 227720_at   | -0.1008054  | -1.96195102 | 0.054526143 | 0.1366565926 |
| 227721_at   | 0.187357956 | 2.694680476 | 0.009179326 | 0.032577024  |
| 227722_at   | -0.25399806 | -3.10776868 | 0.002907201 | 0.012497945  |
| 227723_at   | -0.07170658 | -2.04540915 | 0.045315194 | 0.118130345  |
| 227724_at   | 0.220192254 | 4.424808316 | 4.26E-05    | 0.000360894  |
| 227725_at   | 0.071468431 | 1.62553006  | 0.109419439 | 0.233020754  |
| 227726_at   | -0.01126889 | -0.18680575 | 0.852458549 | 0.919044663  |
| 227727_at   | 0.155755899 | 4.051981489 | 0.000151553 | 0.001042674  |
| 227728_at   | -0.07040359 | -1.26994522 | 0.209126725 | 0.373478186  |
| 227729_at   | 0.08755998  | 3.377697006 | 0.001304338 | 0.006369844  |
| 227730_at   | 0.075101665 | 2.294301388 | 0.025376448 | 0.074574185  |
| 227731_at   | 0.081030968 | 1.474069728 | 0.145818004 | 0.288281794  |
| 227732_at   | -0.03616224 | -0.93766656 | 0.352266639 | 0.535529649  |
| 227733_at   | -0.40176595 | -5.5892687  | 6.26E-07    | 1.08E-05     |
| 227734_s_at | 0.021505924 | 0.752526811 | 0.454748414 | 0.633766251  |
| 227735_s_at | -0.0573425  | -1.14342434 | 0.257514809 | 0.431244457  |
| 227736_at   | -0.0294245  | -0.79820862 | 0.427974286 | 0.609218587  |
| 227737_at   | 0.044393873 | 1.463735214 | 0.14861321  | 0.292359432  |
| 227738_s_at | 0.09298885  | 1.759261932 | 0.083755973 | 0.190107769  |
| 227739_at   | -0.01156297 | -0.42279833 | 0.673990791 | 0.804008478  |
| 227740_at   | 0.29994493  | 3.740044574 | 0.000420524 | 0.002472627  |

|             |             |             |             |             |
|-------------|-------------|-------------|-------------|-------------|
| 227741_at   | -0.31963002 | -3.97629839 | 0.00019484  | 0.001288518 |
| 227742_at   | 0.413832004 | 2.939363448 | 0.004700202 | 0.018745442 |
| 227743_at   | 0.178262447 | 3.291518556 | 0.001691554 | 0.007920266 |
| 227744_s_at | -0.02835515 | -0.66121146 | 0.511069627 | 0.681853358 |
| 227745_at   | 0.015144076 | 0.394146954 | 0.69490407  | 0.819242203 |
| 227746_at   | -0.34489956 | -4.85043227 | 9.48E-06    | 0.000102131 |
| 227747_at   | -0.05360739 | -1.59979015 | 0.115026407 | 0.241861217 |
| 227748_at   | 0.26105999  | 3.319565517 | 0.001554968 | 0.007384404 |
| 227749_at   | -0.01065243 | -0.31820006 | 0.751465092 | 0.857007046 |
| 227750_at   | 0.103038812 | 1.734068992 | 0.088167183 | 0.197869315 |
| 227751_at   | 0.02052662  | 0.37927311  | 0.705856753 | 0.826637755 |
| 227752_at   | 0.002282484 | 0.060682412 | 0.951818744 | 0.975277605 |
| 227753_at   | -0.08196805 | -2.09153017 | 0.0408269   | 0.108706333 |
| 227754_at   | 0.068103798 | 1.334027556 | 0.187359258 | 0.345297318 |
| 227755_at   | 0.215169183 | 5.22982865  | 2.38E-06    | 3.27E-05    |
| 227756_at   | -0.08982384 | -2.49707518 | 0.015354428 | 0.049593127 |
| 227757_at   | 0.103370854 | 2.97320183  | 0.004273071 | 0.017338045 |
| 227758_at   | -0.85689405 | -8.44599456 | 1.02E-11    | 5.51E-09    |
| 227759_at   | 0.032289735 | 1.030619869 | 0.306956598 | 0.487148306 |
| 227760_at   | -0.61486595 | -7.72715621 | 1.66E-10    | 2.87E-08    |
| 227761_at   | -0.84512234 | -6.48108606 | 2.09E-08    | 7.59E-07    |
| 227762_at   | 0.661703037 | 6.291262729 | 4.34E-08    | 1.32E-06    |
| 227763_at   | -0.02149284 | -0.49823632 | 0.62018342  | 0.766961936 |
| 227764_at   | 0.170182659 | 3.151804645 | 0.002557486 | 0.011213496 |
| 227765_at   | 0.062279637 | 1.285656564 | 0.203623321 | 0.366508827 |
| 227766_at   | -0.11274761 | -2.0224376  | 0.047705679 | 0.122949207 |
| 227767_at   | -0.13080311 | -2.20777496 | 0.031189568 | 0.087850517 |
| 227768_at   | 0.017670134 | 0.469355956 | 0.640557944 | 0.781540149 |
| 227769_at   | -0.65194883 | -6.28049062 | 4.52E-08    | 1.36E-06    |
| 227770_at   | 0.222425913 | 6.629128436 | 1.18E-08    | 5.07E-07    |
| 227771_at   | 0.371997301 | 3.697650238 | 0.000481565 | 0.002774183 |
| 227772_at   | 0.211367093 | 3.949648658 | 0.000212748 | 0.001388457 |
| 227773_at   | -0.1247017  | -3.97868585 | 0.000193309 | 0.001279337 |
| 227774_s_at | -0.09918634 | -2.52806753 | 0.014186793 | 0.046374793 |
| 227775_at   | 0.135597251 | 2.074096552 | 0.0424759   | 0.112154846 |
| 227776_at   | -0.03699334 | -0.39488917 | 0.694359204 | 0.818815841 |
| 227777_at   | 0.027598189 | 0.513868271 | 0.609277536 | 0.758508784 |
| 227778_at   | 0.008564409 | 0.25357975  | 0.80070833  | 0.887367408 |
| 227779_at   | 0.106897847 | 2.172880927 | 0.03384734  | 0.093758853 |
| 227780_s_at | -0.01829703 | -0.39612476 | 0.693452518 | 0.818178409 |
| 227781_x_at | -0.08839759 | -1.62695205 | 0.10911626  | 0.232519138 |
| 227782_at   | 0.068350214 | 1.75019353  | 0.085322239 | 0.193000724 |
| 227783_at   | 0.020436844 | 0.693846885 | 0.490521219 | 0.664697078 |
| 227784_s_at | -0.32565498 | -4.49624873 | 3.32E-05    | 0.000292392 |
| 227785_at   | 0.207128606 | 5.316385765 | 1.73E-06    | 2.52E-05    |
| 227786_at   | 0.075971588 | 2.057531785 | 0.044095941 | 0.115599238 |
| 227787_s_at | -0.03744046 | -0.48044463 | 0.632701056 | 0.775893854 |
| 227788_at   | -0.01956918 | -0.51972819 | 0.605211929 | 0.755365603 |
| 227789_at   | 0.052033994 | 1.44793108  | 0.152968749 | 0.298436696 |
| 227790_at   | -0.03101949 | -0.46050598 | 0.646858442 | 0.785773626 |
| 227791_at   | 0.266978116 | 4.917087881 | 7.45E-06    | 8.39E-05    |
| 227792_at   | 0.671531241 | 7.393272673 | 6.07E-10    | 6.58E-08    |
| 227793_at   | 0.041491585 | 1.139097606 | 0.259300229 | 0.433366211 |
| 227794_at   | -0.06800066 | -2.12250819 | 0.038033793 | 0.102744577 |
| 227795_at   | -0.03906496 | -1.15935044 | 0.251018359 | 0.423799726 |
| 227796_at   | 0.230698774 | 3.792079993 | 0.000355694 | 0.00214559  |
| 227797_x_at | -0.0295053  | -0.82862448 | 0.410681203 | 0.592911368 |
| 227798_at   | 0.452491946 | 5.20215814  | 2.64E-06    | 3.55E-05    |
| 227799_at   | -0.03478825 | -1.03609462 | 0.304417147 | 0.484353701 |
| 227800_at   | -0.03606732 | -0.91630036 | 0.363267107 | 0.546349361 |
| 227801_at   | 0.387852741 | 2.782072457 | 0.007256504 | 0.026831116 |
| 227802_at   | 0.353918473 | 4.622023301 | 2.14E-05    | 0.000202207 |
| 227803_at   | -0.09883919 | -0.7839269  | 0.436242096 | 0.616744646 |
| 227804_at   | -0.00344002 | -0.08604136 | 0.931727024 | 0.964553616 |
| 227805_at   | 0.096833308 | 2.312075038 | 0.024308924 | 0.072124705 |
| 227806_at   | 0.029993522 | 0.740040882 | 0.462231561 | 0.640332867 |
| 227807_at   | 0.060808875 | 1.477144675 | 0.144994331 | 0.287110618 |
| 227808_at   | 0.077324137 | 0.744272769 | 0.459687413 | 0.638201666 |
| 227809_at   | 0.083271596 | 1.92280209  | 0.059371994 | 0.14579413  |
| 227810_at   | 0.206178528 | 5.199737241 | 2.66E-06    | 3.58E-05    |
| 227811_at   | 0.060801138 | 1.669836316 | 0.100288767 | 0.218043664 |
| 227812_at   | 0.200449483 | 2.660262332 | 0.01005706  | 0.035060073 |
| 227813_at   | 0.030995792 | 1.114735717 | 0.269517275 | 0.445181138 |
| 227814_at   | -0.05379793 | -1.80175919 | 0.07673092  | 0.177702269 |
| 227815_at   | 0.019529265 | 0.59843015  | 0.551860437 | 0.714456321 |

|             |             |             |             |             |
|-------------|-------------|-------------|-------------|-------------|
| 227816_at   | 0.180124104 | 4.003914345 | 0.000177819 | 0.001193075 |
| 227817_at   | -1.33707658 | -7.53075129 | 3.56E-10    | 4.70E-08    |
| 227818_at   | 0.000154136 | 0.003103967 | 0.997533946 | 0.998785444 |
| 227819_at   | 0.188381463 | 3.180892791 | 0.002348553 | 0.010428368 |
| 227820_at   | -0.04401371 | -1.25852368 | 0.213196336 | 0.378507554 |
| 227821_at   | 0.285862265 | 4.701110601 | 1.62E-05    | 0.000159931 |
| 227822_at   | 0.181194975 | 3.058220625 | 0.003353999 | 0.014111931 |
| 227823_at   | -0.2011775  | -4.36340523 | 5.27E-05    | 0.000430994 |
| 227824_at   | -1.19017752 | -7.11328469 | 1.80E-09    | 1.35E-07    |
| 227825_at   | 0.051352327 | 2.22268693  | 0.03011096  | 0.085372978 |
| 227826_s_at | 0.065465578 | 1.080656284 | 0.284280052 | 0.461732959 |
| 227827_at   | 0.041623268 | 0.59224623  | 0.555965394 | 0.718285003 |
| 227828_s_at | -0.06344502 | -1.73796438 | 0.087472806 | 0.196775288 |
| 227829_at   | 0.004708965 | 0.163922718 | 0.870356382 | 0.930039389 |
| 227830_at   | -1.05155694 | -7.18100109 | 1.39E-09    | 1.16E-07    |
| 227831_at   | 0.04208448  | 1.28346463  | 0.20438456  | 0.36744659  |
| 227832_at   | 0.017197904 | 0.486357194 | 0.62852895  | 0.772834507 |
| 227833_s_at | 0.304425702 | 6.505357399 | 1.90E-08    | 7.13E-07    |
| 227834_at   | -0.01393857 | -0.64079648 | 0.524154462 | 0.692714055 |
| 227835_at   | -0.08577338 | -1.30380247 | 0.197402553 | 0.358368467 |
| 227836_at   | 0.006058835 | 0.075571216 | 0.940017792 | 0.968605305 |
| 227837_at   | 0.113323542 | 2.879923814 | 0.005547756 | 0.021468551 |
| 227838_at   | 0.049646914 | 0.729850362 | 0.468390911 | 0.645334236 |
| 227839_at   | -0.06146724 | -1.31397809 | 0.193977165 | 0.354019417 |
| 227840_at   | 0.140228344 | 2.808055483 | 0.006760813 | 0.025299694 |
| 227841_at   | 0.053044358 | 2.15308321  | 0.035441947 | 0.097217915 |
| 227842_at   | 0.032231841 | 0.945878603 | 0.348096777 | 0.531123593 |
| 227843_at   | -0.00535149 | -0.13919303 | 0.889775165 | 0.941008189 |
| 227844_at   | 0.091308702 | 2.051070268 | 0.044742237 | 0.116971047 |
| 227845_s_at | 0.030677459 | 0.99744314  | 0.322652829 | 0.504583954 |
| 227846_at   | -0.21275382 | -3.47575459 | 0.000966043 | 0.00495403  |
| 227847_at   | -0.16214659 | -2.79250383 | 0.007053611 | 0.026216063 |
| 227848_at   | 0.055724274 | 1.041621031 | 0.301868282 | 0.481480988 |
| 227849_at   | -0.00650046 | -0.16042801 | 0.873095993 | 0.931630363 |
| 227850_x_at | 0.099188361 | 2.996076222 | 0.004005094 | 0.016415595 |
| 227851_s_at | 0.086152982 | 2.394884129 | 0.01984399  | 0.061213942 |
| 227852_at   | 0.091543972 | 2.245355751 | 0.028534252 | 0.081825651 |
| 227853_at   | -0.14853767 | -3.60045176 | 0.000655091 | 0.003591867 |
| 227854_at   | 0.205860592 | 5.087085247 | 4.02E-06    | 5.03E-05    |
| 227855_at   | 0.123301134 | 3.422492731 | 0.001137822 | 0.005669699 |
| 227856_at   | 0.127197121 | 2.213704953 | 0.030756633 | 0.086811637 |
| 227857_at   | -0.05712725 | -1.68946398 | 0.09644791  | 0.211812991 |
| 227858_at   | 0.027665007 | 0.844973295 | 0.40156448  | 0.583893693 |
| 227859_at   | -0.14315199 | -1.72262615 | 0.090233342 | 0.201313326 |
| 227860_at   | 0.03557181  | 1.063638351 | 0.291858506 | 0.470302166 |
| 227861_at   | -0.10149589 | -1.92995982 | 0.058459559 | 0.144004552 |
| 227862_at   | -0.57851406 | -8.52674987 | 7.49E-12    | 4.85E-09    |
| 227863_at   | 0.070306049 | 2.016451906 | 0.048346146 | 0.124155947 |
| 227864_s_at | 0.206361371 | 4.372582401 | 5.11E-05    | 0.000419081 |
| 227865_at   | -0.35556775 | -4.84095938 | 9.80E-06    | 0.000105134 |
| 227866_at   | -0.09402268 | -2.05583005 | 0.044265363 | 0.115975356 |
| 227867_at   | 0.006492876 | 0.175364775 | 0.861397915 | 0.924489593 |
| 227868_at   | -0.04783961 | -1.03862912 | 0.303246383 | 0.483017924 |
| 227869_at   | 0.026190545 | 0.861823641 | 0.392299607 | 0.575105098 |
| 227870_at   | 0.870786406 | 8.689594368 | 4.00E-12    | 3.81E-09    |
| 227871_at   | -0.32011986 | -5.6996086  | 4.13E-07    | 7.76E-06    |
| 227872_at   | -0.04069629 | -1.07802216 | 0.285444065 | 0.463253183 |
| 227873_at   | -0.12998955 | -2.31209339 | 0.024307843 | 0.072124705 |
| 227874_at   | 0.179082436 | 2.917959012 | 0.004990506 | 0.019689474 |
| 227875_at   | -0.92948635 | -7.12115589 | 1.75E-09    | 1.33E-07    |
| 227876_at   | 0.155455505 | 3.811705368 | 0.000333827 | 0.00203622  |
| 227877_at   | 0.165686083 | 4.258227482 | 7.56E-05    | 0.000583178 |
| 227878_s_at | -0.14421777 | -3.6282637  | 0.000600136 | 0.00333764  |
| 227879_at   | -0.07744303 | -2.18864873 | 0.032622687 | 0.091043657 |
| 227880_s_at | -0.05083953 | -1.00073542 | 0.321071625 | 0.502938315 |
| 227881_s_at | 0.015325224 | 0.443698261 | 0.658895704 | 0.793874247 |
| 227882_at   | -0.16421291 | -4.9758746  | 6.03E-06    | 7.02E-05    |
| 227883_at   | 0.030545979 | 0.862462051 | 0.391951221 | 0.574745192 |
| 227884_at   | 0.12758834  | 2.089783863 | 0.040989532 | 0.109048406 |
| 227885_at   | -0.00645021 | -0.18501265 | 0.853858331 | 0.919976773 |
| 227886_at   | -0.0016564  | -0.06262527 | 0.950278151 | 0.974525726 |
| 227887_at   | -0.04312934 | -1.45659176 | 0.15056973  | 0.295026629 |
| 227888_at   | 0.038870279 | 1.19809314  | 0.235706839 | 0.404772721 |
| 227889_at   | 0.307288812 | 3.543325308 | 0.000783387 | 0.004161057 |
| 227890_at   | -0.12461355 | -4.12137677 | 0.000120136 | 0.000860987 |

|             |             |             |             |             |
|-------------|-------------|-------------|-------------|-------------|
| 227891_s_at | 0.222987598 | 4.320924399 | 6.10E-05    | 0.000485628 |
| 227892_at   | -0.30243119 | -4.77292279 | 1.25E-05    | 0.000128331 |
| 227893_at   | -0.0232598  | -0.62539831 | 0.534139121 | 0.70078534  |
| 227894_at   | 0.163291492 | 2.821044979 | 0.006524885 | 0.024558711 |
| 227895_at   | 0.005086439 | 0.161801708 | 0.872018922 | 0.930970084 |
| 227896_at   | 0.166516948 | 2.390611425 | 0.020055043 | 0.061715899 |
| 227897_at   | -0.24284173 | -3.41072753 | 0.00117949  | 0.005849288 |
| 227898_s_at | 0.18202223  | 4.832355288 | 1.01E-05    | 0.000107862 |
| 227899_at   | 0.020786727 | 0.559826618 | 0.577732702 | 0.734776037 |
| 227900_at   | -0.00261306 | -0.08497473 | 0.932571301 | 0.965056973 |
| 227901_at   | 0.011694955 | 0.334178399 | 0.739438673 | 0.848899322 |
| 227902_at   | 0.222492234 | 6.052226978 | 1.08E-07    | 2.68E-06    |
| 227903_x_at | -0.05927013 | -1.39911082 | 0.167053743 | 0.318459559 |
| 227904_at   | -0.13590496 | -3.9450311  | 0.000216008 | 0.001406856 |
| 227905_s_at | -0.15236167 | -3.37933443 | 0.001297865 | 0.006342422 |
| 227906_s_at | 0.033914779 | 0.891451776 | 0.376334726 | 0.559091566 |
| 227907_at   | -0.12316791 | -4.25180811 | 7.73E-05    | 0.000593772 |
| 227908_at   | -0.13787928 | -2.14243867 | 0.036326196 | 0.099162615 |
| 227909_at   | -0.45151348 | -4.15419363 | 0.000107569 | 0.000783358 |
| 227910_at   | -0.06706687 | -2.05884188 | 0.043965892 | 0.115319189 |
| 227911_at   | -0.05058511 | -1.87602704 | 0.065637864 | 0.157782242 |
| 227912_s_at | -0.08514578 | -2.20548851 | 0.031357923 | 0.088207975 |
| 227913_at   | -0.01096384 | -0.29646272 | 0.76792553  | 0.867079483 |
| 227914_s_at | 0.012545212 | 0.318683635 | 0.751100189 | 0.856799991 |
| 227915_at   | -0.0376026  | -1.06109155 | 0.293004526 | 0.471520777 |
| 227916_x_at | -0.03646407 | -0.88551078 | 0.379502598 | 0.562121694 |
| 227917_at   | 0.256684057 | 2.980864649 | 0.004181495 | 0.017025591 |
| 227918_s_at | 0.095225522 | 1.333521938 | 0.187524024 | 0.345515487 |
| 227919_at   | -0.03227316 | -0.74837441 | 0.457229259 | 0.636093075 |
| 227920_at   | -0.02890526 | -0.78033489 | 0.438336311 | 0.618820769 |
| 227921_at   | 0.081793281 | 0.840399922 | 0.404102134 | 0.586388348 |
| 227922_x_at | 0.037663539 | 0.818983776 | 0.416115861 | 0.598456961 |
| 227923_at   | -0.43648989 | -5.37022906 | 1.42E-06    | 2.13E-05    |
| 227924_at   | -0.14516078 | -5.32658469 | 1.67E-06    | 2.44E-05    |
| 227925_at   | -0.00916552 | -0.30564088 | 0.760961838 | 0.86240412  |
| 227926_s_at | 0.00730573  | 0.160612154 | 0.872951601 | 0.93157385  |
| 227927_at   | -0.04838882 | -1.12964654 | 0.263230738 | 0.437970378 |
| 227928_at   | -0.03725538 | -1.2513417  | 0.215785209 | 0.381769231 |
| 227929_at   | -0.15924093 | -2.11541418 | 0.038658272 | 0.104020883 |
| 227930_at   | 0.151394874 | 2.401200947 | 0.019535609 | 0.060446237 |
| 227931_at   | 0.452046968 | 4.850141712 | 9.49E-06    | 0.000102164 |
| 227932_at   | 0.048000796 | 0.887454887 | 0.378464109 | 0.561024178 |
| 227933_at   | -0.28142899 | -4.08885026 | 0.000133987 | 0.000942864 |
| 227934_at   | 0.147772035 | 2.492525138 | 0.015532971 | 0.050061265 |
| 227935_s_at | 0.046960121 | 0.93789382  | 0.352150808 | 0.535444627 |
| 227936_at   | 0.025730897 | 0.481109278 | 0.632231459 | 0.775587639 |
| 227937_at   | -0.25500823 | -6.03207647 | 1.17E-07    | 2.85E-06    |
| 227938_s_at | 0.006961674 | 0.242206396 | 0.809466391 | 0.892992639 |
| 227939_s_at | 0.034418439 | 1.213771356 | 0.229707206 | 0.397594888 |
| 227940_at   | 0.145223724 | 2.907879282 | 0.005132899 | 0.02013336  |
| 227941_at   | 0.068081252 | 2.03419317  | 0.046469108 | 0.120466237 |
| 227942_s_at | -0.020987   | -0.26893424 | 0.788925435 | 0.879597245 |
| 227943_at   | 0.041034829 | 0.430280703 | 0.668570712 | 0.800272532 |
| 227944_at   | 0.107149507 | 2.325602231 | 0.023523401 | 0.070274589 |
| 227945_at   | 0.06012071  | 1.570055315 | 0.121789735 | 0.252307368 |
| 227946_at   | 0.163906741 | 4.860915897 | 9.13E-06    | 9.90E-05    |
| 227947_at   | 0.460518965 | 6.088394011 | 9.44E-08    | 2.42E-06    |
| 227948_at   | 0.355336245 | 5.363120529 | 1.45E-06    | 2.18E-05    |
| 227949_at   | 0.425470103 | 6.14398375  | 7.63E-08    | 2.04E-06    |
| 227950_at   | -0.08667327 | -2.42824469 | 0.018263354 | 0.057246866 |
| 227951_s_at | -0.17483743 | -3.63973118 | 0.000578783 | 0.003243099 |
| 227952_at   | -0.10633981 | -0.74391045 | 0.459904918 | 0.638404479 |
| 227953_at   | -0.04904425 | -1.45996537 | 0.149643238 | 0.293704253 |
| 227954_at   | 0.045353071 | 1.609987328 | 0.112778005 | 0.238310856 |
| 227955_s_at | -0.02692568 | -0.54454332 | 0.588135132 | 0.742848047 |
| 227956_at   | -9.77E-05   | -0.0023932  | 0.998098641 | 0.999059878 |
| 227957_at   | 0.060404047 | 1.491434052 | 0.141214576 | 0.281723189 |
| 227958_s_at | -0.02541515 | -0.74472093 | 0.459418458 | 0.637969149 |
| 227959_at   | 0.3614062   | 4.83148081  | 1.01E-05    | 0.000108072 |
| 227960_s_at | -0.04761497 | -0.61568884 | 0.540485313 | 0.70600464  |
| 227961_at   | -0.09241604 | -0.89896631 | 0.372351866 | 0.555501205 |
| 227962_at   | 0.122603763 | 2.271377479 | 0.026814636 | 0.077863667 |
| 227963_at   | -0.00203608 | -0.07628925 | 0.939448995 | 0.968333385 |
| 227964_at   | 0.212326738 | 4.125547643 | 0.000118463 | 0.000851121 |
| 227965_at   | 0.06903693  | 1.978537501 | 0.052577458 | 0.132659163 |

|             |             |             |             |             |
|-------------|-------------|-------------|-------------|-------------|
| 227966_s_at | 0.161576614 | 1.911988807 | 0.060773396 | 0.148541679 |
| 227967_at   | -0.0352363  | -1.23547272 | 0.221587663 | 0.388530944 |
| 227968_at   | 0.271875467 | 6.801971996 | 6.04E-09    | 3.15E-07    |
| 227969_at   | 0.209879258 | 6.216568252 | 5.78E-08    | 1.65E-06    |
| 227970_at   | 0.017110924 | 0.553159089 | 0.582259963 | 0.738134106 |
| 227971_at   | 0.027961951 | 0.784586336 | 0.435858272 | 0.616459434 |
| 227972_at   | 0.023431324 | 0.708037282 | 0.481730564 | 0.656968123 |
| 227973_at   | -0.10873791 | -2.25414489 | 0.027942832 | 0.080418639 |
| 227974_at   | -0.20548864 | -4.00628615 | 0.000176426 | 0.001184973 |
| 227975_at   | -0.04115789 | -0.95792741 | 0.34203721  | 0.524971361 |
| 227976_at   | 0.161172486 | 3.530587129 | 0.000815092 | 0.004296273 |
| 227977_at   | -0.22678317 | -4.88658933 | 8.32E-06    | 9.16E-05    |
| 227978_s_at | -0.36637421 | -4.58853989 | 2.41E-05    | 0.000223046 |
| 227979_at   | -0.10303664 | -1.73313096 | 0.088335073 | 0.198126622 |
| 227980_at   | 0.181833923 | 4.239734207 | 8.05E-05    | 0.000613807 |
| 227981_at   | -0.02736916 | -1.00414641 | 0.319438896 | 0.500995338 |
| 227982_at   | 0.185426792 | 4.107463942 | 0.000125882 | 0.000896561 |
| 227983_at   | 0.200332545 | 4.496112624 | 3.33E-05    | 0.000292473 |
| 227984_at   | -0.31695979 | -3.85101018 | 0.000293847 | 0.001829564 |
| 227985_at   | 0.027848493 | 0.680828159 | 0.498663248 | 0.671677453 |
| 227986_at   | -0.00015822 | -0.00462209 | 0.996327824 | 0.998248736 |
| 227987_at   | -0.41491652 | -4.81924571 | 1.06E-05    | 0.000111986 |
| 227988_s_at | -0.46342522 | -7.00546264 | 2.74E-09    | 1.80E-07    |
| 227989_at   | -0.02219208 | -0.52182752 | 0.603758457 | 0.754415326 |
| 227990_at   | -0.27455942 | -3.46646576 | 0.000994111 | 0.005069494 |
| 227991_x_at | 0.063070462 | 1.425979118 | 0.159183072 | 0.307196001 |
| 227992_s_at | 0.265921053 | 4.917235264 | 7.45E-06    | 8.39E-05    |
| 227993_at   | 0.025363183 | 0.536728702 | 0.593488172 | 0.746718093 |
| 227994_x_at | 0.051268368 | 0.696498643 | 0.488871817 | 0.663286559 |
| 227995_at   | 0.08188469  | 1.680257541 | 0.098234185 | 0.214666274 |
| 227996_at   | 0.086794941 | 1.427721181 | 0.158682865 | 0.306487503 |
| 227997_at   | 0.528791918 | 6.727608986 | 8.06E-09    | 3.83E-07    |
| 227998_at   | 0.223974369 | 3.277775804 | 0.00176254  | 0.008200232 |
| 227999_at   | -0.42424044 | -6.99477426 | 2.86E-09    | 1.84E-07    |
| 228000_at   | 0.03114201  | 0.707315793 | 0.48217538  | 0.657313997 |
| 228001_at   | 0.118997909 | 2.899866587 | 0.005248768 | 0.020501479 |
| 228002_at   | -0.10283451 | -2.76832408 | 0.007532121 | 0.027662157 |
| 228003_at   | 0.16568881  | 3.249276122 | 0.001918796 | 0.008804398 |
| 228004_at   | -0.06514337 | -1.82400337 | 0.073254687 | 0.171507072 |
| 228005_at   | -0.20404009 | -3.71542704 | 0.000455003 | 0.002644685 |
| 228006_at   | 0.058740807 | 1.578755335 | 0.119778643 | 0.249169015 |
| 228007_at   | 0.268913553 | 5.111481929 | 3.68E-06    | 4.69E-05    |
| 228008_at   | 0.096266746 | 2.380962313 | 0.020539078 | 0.062906196 |
| 228009_x_at | 0.020078909 | 0.559541161 | 0.577926179 | 0.734896626 |
| 228010_at   | -0.52350558 | -5.54392112 | 7.42E-07    | 1.25E-05    |
| 228011_at   | -0.03109523 | -0.55100204 | 0.583728232 | 0.739478779 |
| 228012_at   | -0.35227358 | -7.26701829 | 9.92E-10    | 9.29E-08    |
| 228013_at   | -0.22642455 | -4.87401513 | 8.71E-06    | 9.51E-05    |
| 228014_at   | 0.036851907 | 1.175030852 | 0.244737583 | 0.415917871 |
| 228015_s_at | 0.034100756 | 1.013436313 | 0.315020416 | 0.496277361 |
| 228016_s_at | 0.027856957 | 0.635743921 | 0.527419854 | 0.695384492 |
| 228017_s_at | 0.089755476 | 1.240427342 | 0.219763831 | 0.386638765 |
| 228018_at   | 0.014339796 | 0.215683289 | 0.829984029 | 0.905695044 |
| 228019_s_at | -0.20133344 | -2.87699132 | 0.005593027 | 0.021611928 |
| 228020_at   | -0.01936929 | -0.46146685 | 0.64617311  | 0.785328567 |
| 228021_at   | 0.000537617 | 0.014415855 | 0.988547207 | 0.994757125 |
| 228022_at   | 0.011555859 | 0.28521417  | 0.776486295 | 0.871933867 |
| 228023_x_at | 0.037190803 | 0.682529126 | 0.497595278 | 0.670683642 |
| 228024_at   | -0.00590139 | -0.11345378 | 0.910058823 | 0.95252713  |
| 228025_s_at | 0.053680089 | 1.461780042 | 0.149146722 | 0.292996277 |
| 228026_at   | 0.041496959 | 0.898789011 | 0.372445528 | 0.5555561   |
| 228027_at   | -0.56595149 | -5.47719012 | 9.52E-07    | 1.54E-05    |
| 228028_at   | 0.238973888 | 3.837123963 | 0.000307416 | 0.001901594 |
| 228029_at   | 0.038327742 | 0.858072742 | 0.394350389 | 0.577011034 |
| 228030_at   | 0.245407541 | 2.559828083 | 0.013074153 | 0.043407624 |
| 228031_at   | 0.148671342 | 3.706593918 | 0.000468021 | 0.002708378 |
| 228032_s_at | -0.37101735 | -6.45188792 | 2.34E-08    | 8.25E-07    |
| 228033_at   | 0.03865335  | 0.670468534 | 0.505194551 | 0.676945248 |
| 228034_x_at | -0.04521248 | -1.52165685 | 0.133476351 | 0.270402933 |
| 228035_at   | 0.154341213 | 3.067557061 | 0.003265185 | 0.013795391 |
| 228036_s_at | -0.01021829 | -0.37065628 | 0.712230839 | 0.830988661 |
| 228037_at   | 0.104841721 | 2.886696996 | 0.005444486 | 0.02113113  |
| 228038_at   | 0.534046177 | 5.185971794 | 2.80E-06    | 3.73E-05    |
| 228039_at   | 0.036984576 | 0.925467824 | 0.358520457 | 0.541612191 |
| 228040_at   | 0.203494878 | 4.619638033 | 2.16E-05    | 0.000203615 |

|             |             |             |             |             |
|-------------|-------------|-------------|-------------|-------------|
| 228041_at   | 0.227779271 | 4.24580447  | 7.89E-05    | 0.000603759 |
| 228042_at   | 0.128700478 | 4.20100438  | 9.18E-05    | 0.000685312 |
| 228043_at   | -0.1010215  | -2.92067873 | 0.004952718 | 0.019572877 |
| 228044_at   | -0.36111747 | -5.62125913 | 5.55E-07    | 9.85E-06    |
| 228045_at   | -0.23744228 | -3.37461636 | 0.001316599 | 0.006423739 |
| 228046_at   | -0.12275937 | -1.98607605 | 0.051711707 | 0.130947907 |
| 228047_at   | 0.054896594 | 1.765008014 | 0.082775942 | 0.188438387 |
| 228048_at   | -0.14156821 | -3.13782756 | 0.002663968 | 0.011615422 |
| 228049_x_at | 0.197066982 | 2.364378891 | 0.021395418 | 0.065070024 |
| 228050_at   | 0.011010953 | 0.308751394 | 0.758606282 | 0.86112413  |
| 228051_at   | -0.17529258 | -1.91080399 | 0.060928644 | 0.148831599 |
| 228052_x_at | 0.072333898 | 2.18091959  | 0.033218044 | 0.092395668 |
| 228053_s_at | -0.50327079 | -5.96098323 | 1.53E-07    | 3.51E-06    |
| 228054_at   | -0.18838089 | -4.0811202  | 0.000137498 | 0.000963934 |
| 228055_at   | 0.150985806 | 1.335184709 | 0.186982589 | 0.34493028  |
| 228056_s_at | 0.052488436 | 0.883356853 | 0.38065526  | 0.563449968 |
| 228057_at   | -0.22623522 | -2.77688357 | 0.007359418 | 0.027135166 |
| 228058_at   | 0.00366059  | 0.093683471 | 0.925680365 | 0.961003967 |
| 228059_x_at | -0.1384202  | -4.20509167 | 9.06E-05    | 0.000678372 |
| 228060_at   | -0.38167236 | -7.17523232 | 1.42E-09    | 1.17E-07    |
| 228061_at   | -0.0614758  | -1.55568779 | 0.125170123 | 0.257840299 |
| 228062_at   | -0.69726289 | -4.21572256 | 8.73E-05    | 0.000657088 |
| 228063_s_at | -0.45808369 | -3.46121592 | 0.001010316 | 0.005139202 |
| 228064_at   | 0.020518678 | 0.633468254 | 0.528894051 | 0.696417421 |
| 228065_at   | 0.036411544 | 1.112364374 | 0.270526716 | 0.446221812 |
| 228066_at   | -0.04552427 | -0.9483781  | 0.346834013 | 0.529829974 |
| 228067_at   | -1.10892772 | -7.24231781 | 1.09E-09    | 9.88E-08    |
| 228068_at   | 0.116755788 | 3.946949468 | 0.000214648 | 0.001399327 |
| 228069_at   | -0.01752979 | -0.62699192 | 0.533101218 | 0.699984124 |
| 228070_at   | 0.021035573 | 0.598522044 | 0.551799553 | 0.714418888 |
| 228071_at   | 0.156632358 | 2.039611773 | 0.045908505 | 0.119426246 |
| 228072_at   | -0.28573907 | -5.15886058 | 3.09E-06    | 4.06E-05    |
| 228073_at   | -0.00837335 | -0.22266133 | 0.824573818 | 0.902618538 |
| 228074_at   | 0.016549492 | 0.397292302 | 0.692596173 | 0.817560668 |
| 228075_x_at | 0.061188994 | 1.879584084 | 0.065142469 | 0.15685293  |
| 228076_s_at | -0.01838119 | -0.66791398 | 0.506812167 | 0.678299326 |
| 228077_at   | 0.059862221 | 1.307005922 | 0.196319321 | 0.357069147 |
| 228078_at   | 0.029965027 | 0.849500315 | 0.399062232 | 0.581433438 |
| 228079_at   | 0.121315579 | 2.684685065 | 0.009426718 | 0.03326772  |
| 228080_at   | 0.1799573   | 2.385788106 | 0.020295708 | 0.062323468 |
| 228081_at   | 0.040101495 | 0.803829122 | 0.424746356 | 0.60614337  |
| 228082_at   | -0.02466436 | -0.61861354 | 0.538569645 | 0.704698729 |
| 228083_at   | -0.10117566 | -1.70419612 | 0.093645039 | 0.207115558 |
| 228084_at   | 0.138945203 | 2.561954254 | 0.013002573 | 0.043195643 |
| 228085_at   | -0.0162415  | -0.43698676 | 0.663727983 | 0.797052159 |
| 228086_at   | 0.326027406 | 4.548038168 | 2.77E-05    | 0.000251206 |
| 228087_at   | -0.18308529 | -3.48997492 | 0.000924526 | 0.004774545 |
| 228088_at   | 0.206353521 | 3.33590609  | 0.001480263 | 0.007089149 |
| 228089_x_at | 0.116668712 | 3.928607735 | 0.000227997 | 0.001474624 |
| 228090_at   | 0.035388385 | 1.144417477 | 0.257106231 | 0.430859488 |
| 228091_at   | 0.142040891 | 4.417065107 | 4.38E-05    | 0.000368199 |
| 228092_at   | -0.22716055 | -3.25795612 | 0.001869875 | 0.008626867 |
| 228093_at   | 0.204117026 | 5.434697792 | 1.12E-06    | 1.74E-05    |
| 228094_at   | 0.072259696 | 1.931903512 | 0.058213858 | 0.143549644 |
| 228095_at   | -0.03043805 | -0.40668473 | 0.685721963 | 0.812381666 |
| 228096_at   | -0.08353661 | -2.10196282 | 0.03986695  | 0.106607655 |
| 228097_at   | 0.07532915  | 1.346068881 | 0.183467681 | 0.340583078 |
| 228098_s_at | 0.367151994 | 4.831869936 | 1.01E-05    | 0.000107973 |
| 228099_at   | -0.05489895 | -1.47672816 | 0.145105687 | 0.287292932 |
| 228100_at   | 0.35076955  | 3.036608211 | 0.003568318 | 0.014873651 |
| 228101_at   | -0.64173575 | -5.71702869 | 3.87E-07    | 7.36E-06    |
| 228102_at   | 0.018164812 | 0.481656959 | 0.631844615 | 0.775290325 |
| 228103_s_at | -0.05605344 | -1.54433963 | 0.127892801 | 0.261972115 |
| 228104_at   | -0.41288333 | -5.41026262 | 1.22E-06    | 1.87E-05    |
| 228105_at   | 0.480923105 | 6.719138704 | 8.32E-09    | 3.90E-07    |
| 228106_at   | 0.021430319 | 0.199566671 | 0.842510782 | 0.913498432 |
| 228107_at   | -0.11165399 | -2.5711539  | 0.012696937 | 0.042385085 |
| 228108_at   | 0.279446783 | 3.328241835 | 0.00151487  | 0.007221607 |
| 228109_at   | -0.38018283 | -3.0129808  | 0.0038172   | 0.015762573 |
| 228110_x_at | 0.108077265 | 2.170828163 | 0.034009705 | 0.094132763 |
| 228111_s_at | 0.082982608 | 1.198690632 | 0.235476129 | 0.404468851 |
| 228112_at   | -0.0950069  | -2.62642165 | 0.01099417  | 0.03763703  |
| 228113_at   | -0.00097343 | -0.02902393 | 0.976944181 | 0.988425906 |
| 228114_x_at | -0.2074953  | -5.58666666 | 6.32E-07    | 1.09E-05    |
| 228115_at   | 0.454680437 | 5.302182115 | 1.82E-06    | 2.63E-05    |

|             |             |             |             |             |
|-------------|-------------|-------------|-------------|-------------|
| 228116_at   | 0.054781641 | 1.632437155 | 0.107953168 | 0.230689633 |
| 228117_at   | -0.000916   | -0.0317338  | 0.974792237 | 0.987265038 |
| 228118_x_at | 0.072142601 | 2.159472787 | 0.034920257 | 0.096081765 |
| 228119_at   | -0.05273756 | -1.22232439 | 0.22648154  | 0.393990546 |
| 228120_at   | 0.005138854 | 0.144181166 | 0.885852408 | 0.938831297 |
| 228121_at   | 0.764596103 | 6.670046594 | 1.01E-08    | 4.50E-07    |
| 228122_at   | 0.097486979 | 2.63148542  | 0.010849059 | 0.037228665 |
| 228123_s_at | -0.31298832 | -4.04197779 | 0.000156691 | 0.001072407 |
| 228124_at   | 0.198458615 | 2.257659421 | 0.02770939  | 0.079854789 |
| 228125_at   | 0.060823638 | 1.704552202 | 0.09357813  | 0.206997419 |
| 228126_x_at | -0.88459088 | -8.8662709  | 2.03E-12    | 2.93E-09    |
| 228127_at   | 0.006069109 | 0.194003709 | 0.846844316 | 0.915775411 |
| 228128_x_at | -0.03883167 | -1.21692968 | 0.228512204 | 0.396046753 |
| 228129_at   | 0.036078402 | 0.932039363 | 0.355142634 | 0.53823577  |
| 228130_at   | -0.01325323 | -0.45623064 | 0.649911519 | 0.787918989 |
| 228131_at   | 0.144855495 | 3.647267077 | 0.000565147 | 0.003177645 |
| 228132_at   | -0.79594145 | -6.5357685  | 1.69E-08    | 6.54E-07    |
| 228133_s_at | 0.032242524 | 0.85395618  | 0.396608738 | 0.579135826 |
| 228134_at   | 0.047410133 | 1.435970512 | 0.15633075  | 0.303020076 |
| 228135_at   | -0.15739771 | -1.83459925 | 0.071645842 | 0.168650372 |
| 228136_s_at | 0.133298316 | 3.59236182  | 0.000671956 | 0.003669935 |
| 228137_s_at | 0.004267936 | 0.109367163 | 0.913285155 | 0.953997126 |
| 228138_at   | 0.104461451 | 3.477084251 | 0.000962087 | 0.004938845 |
| 228139_at   | -0.05429851 | -1.29325338 | 0.201001395 | 0.363117116 |
| 228140_s_at | -0.18832805 | -3.67066053 | 0.000524747 | 0.002984856 |
| 228141_at   | 0.143598208 | 2.937862978 | 0.00472003  | 0.018816125 |
| 228142_at   | -0.34646239 | -6.49336273 | 1.99E-08    | 7.38E-07    |
| 228143_at   | 0.687151936 | 4.336877267 | 5.77E-05    | 0.000464198 |
| 228144_at   | 0.034956645 | 1.112614644 | 0.270420055 | 0.446095271 |
| 228145_s_at | -0.02286627 | -0.58559428 | 0.560398028 | 0.721870837 |
| 228146_at   | -0.11616967 | -3.23090988 | 0.00202631  | 0.009210725 |
| 228147_at   | 0.011942999 | 0.373266805 | 0.710297565 | 0.829751132 |
| 228148_at   | -0.00542953 | -0.18963533 | 0.850250613 | 0.917790082 |
| 228149_at   | -0.07447117 | -1.13792829 | 0.259784253 | 0.433850672 |
| 228150_at   | 0.042721291 | 1.055320727 | 0.295612751 | 0.474586001 |
| 228151_at   | -0.04858375 | -0.77394274 | 0.442077688 | 0.622395919 |
| 228152_s_at | 0.066394608 | 2.146816867 | 0.035960188 | 0.098343698 |
| 228153_at   | 0.356778915 | 4.124333404 | 0.000118948 | 0.000853987 |
| 228154_at   | 0.06689512  | 2.336404638 | 0.022912417 | 0.068752635 |
| 228155_at   | -0.20028143 | -2.81318477 | 0.006666725 | 0.024995746 |
| 228156_at   | 0.099256462 | 1.870758067 | 0.066377533 | 0.159183553 |
| 228157_at   | 0.111887614 | 1.143384876 | 0.257531055 | 0.431244457 |
| 228158_at   | -0.09101178 | -2.23180297 | 0.029467895 | 0.083905401 |
| 228159_at   | 0.308487175 | 7.682355858 | 1.97E-10    | 3.23E-08    |
| 228160_at   | 0.086660279 | 1.601148727 | 0.114724778 | 0.241408718 |
| 228161_at   | -0.00794635 | -0.18687044 | 0.852408057 | 0.919044663 |
| 228162_at   | -0.07823771 | -1.82301226 | 0.073406713 | 0.171773015 |
| 228163_at   | 0.013051331 | 0.396045514 | 0.693510654 | 0.818207301 |
| 228164_at   | 0.136243227 | 3.030175635 | 0.003634534 | 0.015104572 |
| 228165_at   | -0.92223926 | -6.44948684 | 2.36E-08    | 8.30E-07    |
| 228166_at   | 0.005947464 | 0.16803557  | 0.867134229 | 0.928083027 |
| 228167_at   | 0.041630907 | 1.3008382   | 0.198408898 | 0.359581933 |
| 228168_at   | -0.2048482  | -5.25345101 | 2.18E-06    | 3.04E-05    |
| 228169_s_at | 0.026588434 | 0.818546577 | 0.416363347 | 0.598658775 |
| 228170_at   | 0.196615845 | 2.443708329 | 0.017569783 | 0.055454007 |
| 228171_s_at | 0.077550445 | 2.318314615 | 0.02394374  | 0.071251077 |
| 228172_at   | -0.25177817 | -4.93572119 | 6.97E-06    | 7.95E-05    |
| 228173_at   | 0.32240418  | 6.444937262 | 2.40E-08    | 8.41E-07    |
| 228174_at   | -0.66911124 | -5.194903   | 2.71E-06    | 3.63E-05    |
| 228175_at   | -0.02101179 | -0.63684513 | 0.526707253 | 0.694916472 |
| 228176_at   | 0.445049544 | 4.475798937 | 3.57E-05    | 0.000311429 |
| 228177_at   | 0.097825622 | 2.323707013 | 0.023632078 | 0.07056152  |
| 228178_s_at | 0.006066655 | 0.211863619 | 0.832949017 | 0.907622623 |
| 228179_at   | -0.02701627 | -0.76423752 | 0.44779393  | 0.627388558 |
| 228180_at   | 0.106998968 | 2.438139715 | 0.017816769 | 0.056079093 |
| 228181_at   | -0.06117492 | -0.96702546 | 0.337507772 | 0.520294694 |
| 228182_at   | -0.84700619 | -7.69954292 | 1.84E-10    | 3.11E-08    |
| 228183_s_at | -0.11631437 | -2.19740125 | 0.031959836 | 0.089596601 |
| 228184_at   | 0.223616442 | 5.033003479 | 4.90E-06    | 5.92E-05    |
| 228185_at   | -0.21321521 | -2.49609732 | 0.015392642 | 0.049702975 |
| 228186_s_at | 0.004134436 | 0.137827709 | 0.890849361 | 0.941603946 |
| 228187_at   | -0.09706841 | -2.48357375 | 0.015889702 | 0.051019654 |
| 228188_at   | -0.02346657 | -0.2618225  | 0.794376942 | 0.883009857 |
| 228189_at   | -0.53505422 | -5.40383286 | 1.25E-06    | 1.91E-05    |
| 228190_at   | 0.225898322 | 2.681211865 | 0.009514099 | 0.033504383 |

|             |             |             |             |             |
|-------------|-------------|-------------|-------------|-------------|
| 228191_at   | -0.0086465  | -0.15685147 | 0.875901376 | 0.933398133 |
| 228192_at   | 0.0003236   | 0.007152097 | 0.994317808 | 0.997352802 |
| 228193_s_at | 0.096216931 | 3.092165006 | 0.003041515 | 0.012995353 |
| 228194_s_at | -0.77830701 | -5.52441473 | 7.98E-07    | 1.33E-05    |
| 228195_at   | 0.467377844 | 5.360664956 | 1.47E-06    | 2.19E-05    |
| 228196_s_at | -0.10017589 | -2.90225002 | 0.005214051 | 0.02038801  |
| 228197_at   | 0.002371787 | 0.059565337 | 0.952704615 | 0.975755703 |
| 228198_s_at | 0.565286298 | 6.632307807 | 1.16E-08    | 5.03E-07    |
| 228199_at   | 0.366227267 | 5.214051663 | 2.52E-06    | 3.43E-05    |
| 228200_at   | 0.050250728 | 1.109088249 | 0.271925676 | 0.447814201 |
| 228201_at   | 0.168488209 | 2.415849477 | 0.018836947 | 0.058704649 |
| 228202_at   | 0.008799484 | 0.311874296 | 0.756243657 | 0.859779462 |
| 228203_at   | 0.084749304 | 2.332529052 | 0.023129975 | 0.069284506 |
| 228204_at   | -0.0792528  | -1.58663103 | 0.117981192 | 0.24656607  |
| 228205_at   | 0.086068166 | 2.403348623 | 0.019431744 | 0.060229107 |
| 228206_at   | -0.52146038 | -6.26401128 | 4.82E-08    | 1.42E-06    |
| 228207_at   | -0.1469254  | -4.22229528 | 8.54E-05    | 0.000645188 |
| 228208_x_at | 0.021488928 | 0.77971643  | 0.43869748  | 0.61911923  |
| 228209_at   | 0.052231896 | 1.636420593 | 0.107114825 | 0.229259889 |
| 228210_at   | 0.039860844 | 1.29438505  | 0.200612988 | 0.362669005 |
| 228211_at   | -0.02128603 | -0.54416984 | 0.588390439 | 0.743060988 |
| 228212_at   | -0.03754599 | -1.43898992 | 0.155476645 | 0.301940738 |
| 228213_at   | -0.13048721 | -3.98853442 | 0.000187113 | 0.00124534  |
| 228214_at   | 0.246028161 | 5.157833305 | 3.10E-06    | 4.07E-05    |
| 228215_at   | -0.04821609 | -1.30652068 | 0.196483114 | 0.357250747 |
| 228216_at   | 0.34142911  | 5.958712622 | 1.55E-07    | 3.54E-06    |
| 228217_s_at | -0.39769585 | -5.03100352 | 4.93E-06    | 5.95E-05    |
| 228218_at   | -0.09856412 | -1.17957256 | 0.242939713 | 0.413649103 |
| 228219_s_at | -0.06761124 | -1.79457212 | 0.077883161 | 0.179781738 |
| 228220_at   | 0.253251498 | 5.294596219 | 1.88E-06    | 2.68E-05    |
| 228221_at   | 0.334928215 | 3.245639978 | 0.001939646 | 0.008881828 |
| 228222_at   | -0.24275989 | -2.16298863 | 0.034636076 | 0.095493862 |
| 228223_at   | -0.06978569 | -2.74168731 | 0.008093686 | 0.029372556 |
| 228224_at   | 0.258485446 | 3.710262046 | 0.000462572 | 0.002682751 |
| 228225_at   | 0.069587717 | 1.869076578 | 0.066615061 | 0.159622729 |
| 228226_s_at | 0.07641483  | 2.039672857 | 0.045902219 | 0.119416844 |
| 228227_at   | -0.08231039 | -1.91435035 | 0.060464963 | 0.147981689 |
| 228228_at   | -0.06104432 | -1.11467076 | 0.269544891 | 0.445210299 |
| 228229_at   | -0.02578078 | -0.90985065 | 0.366630644 | 0.549778081 |
| 228230_at   | -0.04243123 | -1.46882606 | 0.147231072 | 0.290330528 |
| 228231_at   | 0.209158908 | 4.901644609 | 7.88E-06    | 8.76E-05    |
| 228232_s_at | 0.003161687 | 0.08513986  | 0.932440587 | 0.964969616 |
| 228233_at   | 0.091379404 | 2.83038413  | 0.006359976 | 0.02404128  |
| 228234_at   | 0.048410429 | 0.999103795 | 0.321854606 | 0.503798128 |
| 228235_at   | 0.015382411 | 0.414769505 | 0.679826071 | 0.808135114 |
| 228236_at   | 0.135504223 | 2.387871162 | 0.020191456 | 0.062067306 |
| 228237_at   | -0.06695821 | -1.87108312 | 0.066331697 | 0.159099244 |
| 228238_at   | 0.053804114 | 1.630033848 | 0.108461533 | 0.231477142 |
| 228239_at   | -0.09172045 | -1.03778021 | 0.303638179 | 0.483424085 |
| 228240_at   | 0.169230064 | 2.933956852 | 0.004772013 | 0.018977647 |
| 228241_at   | 0.036570107 | 0.766625126 | 0.446383681 | 0.626292607 |
| 228242_at   | 0.041298442 | 1.113526843 | 0.270031541 | 0.445773614 |
| 228243_at   | 0.208354331 | 3.607953808 | 0.000639812 | 0.003524525 |
| 228244_at   | 0.004374542 | 0.151882261 | 0.879801801 | 0.935524675 |
| 228245_s_at | -0.04161596 | -0.47727308 | 0.634943979 | 0.777428463 |
| 228246_s_at | -0.00271599 | -0.09295037 | 0.926260232 | 0.96133974  |
| 228247_at   | -0.05022785 | -1.07786382 | 0.285514142 | 0.463317798 |
| 228248_at   | 0.28230599  | 4.089871879 | 0.000133529 | 0.000940365 |
| 228249_at   | 0.028787576 | 0.616435536 | 0.539995899 | 0.705699068 |
| 228250_at   | 0.265680735 | 3.249146793 | 0.001919534 | 0.008805072 |
| 228251_at   | -0.17312526 | -2.97041703 | 0.004306811 | 0.01744493  |
| 228252_at   | 0.007968938 | 0.250458999 | 0.803108961 | 0.889177666 |
| 228253_at   | 0.07372492  | 2.909501912 | 0.005109725 | 0.020063594 |
| 228254_at   | 0.112511036 | 3.315649282 | 0.001573393 | 0.007456851 |
| 228255_at   | 0.085795546 | 1.635210959 | 0.10736884  | 0.229759549 |
| 228256_s_at | -0.10269432 | -1.99664382 | 0.050518686 | 0.128502056 |
| 228257_at   | 0.031706984 | 0.94864461  | 0.346699546 | 0.5297332   |
| 228258_at   | -0.04525164 | -1.36106347 | 0.1787079   | 0.334310908 |
| 228259_s_at | -0.00476211 | -0.07862786 | 0.93759666  | 0.967447878 |
| 228260_at   | 0.09360475  | 0.751156046 | 0.455566514 | 0.634510678 |
| 228261_at   | -0.06231308 | -1.44625204 | 0.153437279 | 0.299043216 |
| 228262_at   | -0.60371147 | -6.38279346 | 3.05E-08    | 1.01E-06    |
| 228263_at   | -0.14067048 | -4.32543459 | 6.01E-05    | 0.000479534 |
| 228264_at   | 0.174416164 | 3.874392509 | 0.000272289 | 0.001712278 |
| 228265_at   | 0.00780053  | 0.188513107 | 0.851126146 | 0.918250567 |



|             |             |             |             |             |
|-------------|-------------|-------------|-------------|-------------|
| 228266_s_at | -0.3178033  | -4.99278278 | 5.67E-06    | 6.67E-05    |
| 228267_at   | -0.04953072 | -1.54432257 | 0.12789693  | 0.261972115 |
| 228268_at   | 0.064244301 | 1.462203374 | 0.14903108  | 0.292846333 |
| 228269_x_at | 0.126092336 | 3.584489682 | 0.000688765 | 0.003746626 |
| 228270_at   | 0.068812905 | 2.270976808 | 0.026840402 | 0.077907028 |
| 228271_at   | 0.071361896 | 2.290842794 | 0.02558895  | 0.075092935 |
| 228272_at   | -0.01203609 | -0.23939092 | 0.811638285 | 0.894455251 |
| 228273_at   | 0.220116318 | 3.438477196 | 0.001083442 | 0.005441491 |
| 228274_at   | 0.224863183 | 5.970282938 | 1.48E-07    | 3.42E-06    |
| 228275_at   | -0.23398766 | -3.58361135 | 0.000690665 | 0.003754677 |
| 228276_at   | 0.037262913 | 1.119929964 | 0.267315443 | 0.44261688  |
| 228277_at   | -0.20778771 | -3.55394974 | 0.000757844 | 0.004057696 |
| 228278_at   | 0.532972164 | 8.954246605 | 1.45E-12    | 2.67E-09    |
| 228279_s_at | 0.050215028 | 1.13497259  | 0.261010583 | 0.435313094 |
| 228280_at   | -0.22828836 | -3.21337744 | 0.002134211 | 0.00962581  |
| 228281_at   | -0.00598796 | -0.21848343 | 0.827812019 | 0.904419762 |
| 228282_at   | -0.09028302 | -1.39397985 | 0.168590344 | 0.32055476  |
| 228283_at   | -0.18304639 | -2.48711306 | 0.015747779 | 0.050618509 |
| 228284_at   | -0.32239124 | -3.99180304 | 0.000185099 | 0.00123488  |
| 228285_at   | -0.55052852 | -4.50406541 | 3.23E-05    | 0.000285306 |
| 228286_at   | -0.01163492 | -0.52477043 | 0.601723641 | 0.752928092 |
| 228287_at   | 0.075452551 | 1.531883606 | 0.130935443 | 0.266656041 |
| 228288_at   | -0.02022185 | -0.5878188  | 0.558913731 | 0.720602714 |
| 228289_at   | -0.00965772 | -0.24973176 | 0.803668664 | 0.889510883 |
| 228290_at   | 0.27865748  | 5.039530516 | 4.78E-06    | 5.81E-05    |
| 228291_s_at | 0.121524834 | 2.363963954 | 0.021417247 | 0.06512312  |
| 228292_at   | -0.01252911 | -0.43532098 | 0.664929582 | 0.798179112 |
| 228293_at   | 0.081599062 | 1.181634765 | 0.242126525 | 0.412641804 |
| 228294_s_at | -0.0295826  | -0.93903617 | 0.351568942 | 0.534796431 |
| 228295_at   | 0.017311586 | 0.366214826 | 0.715524403 | 0.833243436 |
| 228296_at   | -0.70339854 | -8.13644405 | 3.38E-11    | 1.17E-08    |
| 228297_at   | 0.295001411 | 2.182222561 | 0.033117016 | 0.092189624 |
| 228298_at   | 0.045464492 | 1.325110779 | 0.190281084 | 0.349104353 |
| 228299_at   | 0.310796671 | 7.333551215 | 7.66E-10    | 7.87E-08    |
| 228300_at   | 0.03903474  | 1.057471183 | 0.294638956 | 0.473413778 |
| 228301_x_at | -0.07334558 | -1.94855258 | 0.05614509  | 0.139665833 |
| 228302_x_at | -0.53191408 | -4.14629582 | 0.000110472 | 0.000800974 |
| 228303_at   | 0.165654697 | 2.98693127  | 0.004110294 | 0.016768349 |
| 228304_at   | 0.214048573 | 3.030288576 | 0.003633361 | 0.015101104 |
| 228305_at   | 0.198290921 | 3.408305947 | 0.001188244 | 0.005886169 |
| 228306_at   | -0.14287911 | -3.97049959 | 0.000198609 | 0.001309565 |
| 228307_at   | 0.029806463 | 1.000157869 | 0.321348634 | 0.503178233 |
| 228308_at   | -0.3963188  | -6.85438127 | 4.93E-09    | 2.75E-07    |
| 228309_at   | -0.0846755  | -2.78460039 | 0.007206848 | 0.026673992 |
| 228310_at   | 0.553350616 | 7.955921605 | 6.82E-11    | 1.71E-08    |
| 228311_at   | 0.027125162 | 1.05088095  | 0.29763021  | 0.47672012  |
| 228312_at   | 0.032303289 | 1.06686565  | 0.290410719 | 0.468743394 |
| 228313_at   | 0.033434421 | 0.732584604 | 0.46673372  | 0.644180318 |
| 228314_at   | -0.06593595 | -1.40128227 | 0.166406706 | 0.317564735 |
| 228315_at   | 0.086235948 | 0.997247222 | 0.322747088 | 0.504696041 |
| 228316_at   | 0.206868923 | 2.745575935 | 0.008009376 | 0.029125714 |
| 228317_at   | -0.0206951  | -0.65626201 | 0.51422579  | 0.684788006 |
| 228318_s_at | 0.170481532 | 2.31241678  | 0.024288795 | 0.072084125 |
| 228319_at   | 0.009232368 | 0.169155986 | 0.866256845 | 0.927684911 |
| 228320_x_at | -0.07978037 | -1.87478849 | 0.065811104 | 0.158088097 |
| 228321_s_at | -0.03085741 | -0.92736225 | 0.357544589 | 0.540609007 |
| 228322_at   | -0.00088307 | -0.0254536  | 0.979779686 | 0.989861457 |
| 228323_at   | -0.00999452 | -0.3483592  | 0.728819578 | 0.841729451 |
| 228324_at   | -0.56625    | -6.88170809 | 4.43E-09    | 2.55E-07    |
| 228325_at   | 0.187363997 | 2.073866336 | 0.042498057 | 0.112200092 |
| 228326_at   | 0.169667752 | 4.059862066 | 0.000147621 | 0.00102128  |
| 228327_x_at | 0.045525906 | 1.577310157 | 0.12011085  | 0.249697372 |
| 228328_at   | 0.104957775 | 2.026265966 | 0.047299893 | 0.122107602 |
| 228329_at   | -0.05152404 | -0.97696083 | 0.332606846 | 0.51521091  |
| 228330_at   | -0.09159024 | -1.88529264 | 0.064354044 | 0.155418985 |
| 228331_at   | -0.03652105 | -1.34008715 | 0.185393143 | 0.343030244 |
| 228332_s_at | -0.32410985 | -4.50958976 | 3.17E-05    | 0.000280572 |
| 228333_at   | 0.454463144 | 3.638699926 | 0.000580673 | 0.003251652 |
| 228334_x_at | 0.318557052 | 3.816617063 | 0.000328559 | 0.002008475 |
| 228335_at   | 0.392598204 | 2.631700018 | 0.010842948 | 0.037216268 |
| 228336_at   | 0.095159883 | 2.170297955 | 0.034051752 | 0.094225802 |
| 228337_at   | 0.194948046 | 3.818242222 | 0.000326834 | 0.00199957  |
| 228338_at   | 0.356805677 | 4.597433792 | 2.33E-05    | 0.000217117 |
| 228339_at   | 0.071116791 | 1.619728517 | 0.110663461 | 0.23495351  |
| 228340_at   | 0.26426873  | 5.137307912 | 3.35E-06    | 4.33E-05    |

|             |              |             |             |             |
|-------------|--------------|-------------|-------------|-------------|
| 228341_at   | 0.401669383  | 5.21064897  | 2.56E-06    | 3.47E-05    |
| 228342_s_at | 0.034413145  | 0.926526749 | 0.357974765 | 0.540968695 |
| 228343_at   | 0.052400252  | 1.478458802 | 0.144643438 | 0.286666665 |
| 228344_s_at | -0.06723883  | -1.76895986 | 0.082107478 | 0.187260022 |
| 228345_at   | -0.35178083  | -4.60436373 | 2.28E-05    | 0.000212812 |
| 228346_at   | 0.074116821  | 1.809954932 | 0.075434395 | 0.17542481  |
| 228347_at   | 0.022496439  | 0.870314234 | 0.387681988 | 0.570318743 |
| 228348_at   | -0.03924681  | -1.30954801 | 0.19546291  | 0.355916052 |
| 228349_at   | 0.361874151  | 7.603863697 | 2.68E-10    | 3.93E-08    |
| 228350_at   | 0.029055838  | 0.87675342  | 0.384202786 | 0.566836314 |
| 228351_at   | -0.06261047  | -2.40622744 | 0.019293296 | 0.05987613  |
| 228352_at   | 0.10021436   | 2.227463484 | 0.029772485 | 0.084600197 |
| 228353_x_at | -0.065411    | -2.38965363 | 0.020102629 | 0.061836789 |
| 228354_at   | -0.19200611  | -4.35461461 | 5.43E-05    | 0.00044172  |
| 228355_s_at | -0.2953901   | -5.5520913  | 7.19E-07    | 1.22E-05    |
| 228356_at   | 0.027022605  | 0.886755327 | 0.378837587 | 0.561466073 |
| 228357_at   | 0.078006809  | 1.246565129 | 0.217519822 | 0.383789809 |
| 228358_at   | 0.030392797  | 1.034989961 | 0.304928385 | 0.484942687 |
| 228359_at   | -0.10963374  | -2.46638421 | 0.016595523 | 0.052868594 |
| 228360_at   | -0.04542111  | -1.35408544 | 0.180911108 | 0.337294199 |
| 228361_at   | 0.086854526  | 3.469238139 | 0.000985654 | 0.005036683 |
| 228362_s_at | 0.015705646  | 0.43711532  | 0.663635283 | 0.797011477 |
| 228363_at   | 0.086667623  | 1.415556728 | 0.162201304 | 0.311400863 |
| 228364_at   | 0.036280416  | 1.043880787 | 0.300830258 | 0.480288139 |
| 228365_at   | 0.039432108  | 0.530453191 | 0.597803418 | 0.750014888 |
| 228366_at   | 0.001937559  | 0.054582581 | 0.956656789 | 0.977791365 |
| 228367_at   | -0.00881515  | -0.22558274 | 0.822311313 | 0.901251124 |
| 228368_at   | -0.71242242  | -7.00698156 | 2.73E-09    | 1.79E-07    |
| 228369_at   | 0.022399193  | 0.546349744 | 0.586900986 | 0.741822863 |
| 228370_at   | 0.528237788  | 7.089247945 | 1.98E-09    | 1.45E-07    |
| 228371_s_at | 0.005609441  | 0.166173178 | 0.868593015 | 0.928821339 |
| 228372_at   | 0.220319     | 3.394951194 | 0.001237638 | 0.006095045 |
| 228373_at   | -0.01775142  | -0.35108708 | 0.726782869 | 0.84046279  |
| 228374_at   | 0.087770158  | 2.636692669 | 0.010701659 | 0.036821815 |
| 228375_at   | 0.141566165  | 1.881134892 | 0.064927478 | 0.15646171  |
| 228376_at   | -0.00984316  | -0.14678841 | 0.883803158 | 0.937927261 |
| 228377_at   | -0.01667966  | -0.46709086 | 0.642168011 | 0.782543225 |
| 228378_at   | -0.38894801  | -5.78264903 | 3.02E-07    | 6.01E-06    |
| 228379_at   | 0.007615599  | 0.30267716  | 0.763208342 | 0.863756995 |
| 228380_at   | -0.16704388  | -2.65294628 | 0.010253246 | 0.035571965 |
| 228381_at   | -0.13000461  | -3.33860583 | 0.001468252 | 0.007039924 |
| 228382_at   | 0.048850627  | 1.325866929 | 0.190031982 | 0.348813428 |
| 228383_at   | 0.028622351  | 0.649037315 | 0.518851436 | 0.688310973 |
| 228384_s_at | 0.118253287  | 3.504302884 | 0.000884413 | 0.004603137 |
| 228385_at   | 0.086421027  | 2.751868957 | 0.007874643 | 0.028708176 |
| 228386_s_at | 0.085069112  | 2.091489971 | 0.040830637 | 0.108706968 |
| 228387_at   | 0.074907637  | 2.242850486 | 0.028704844 | 0.08220408  |
| 228388_at   | 0.14759294   | 4.057708033 | 0.000148686 | 0.001027217 |
| 228389_at   | 0.025089442  | 0.938171623 | 0.352009249 | 0.535284021 |
| 228390_at   | 0.644969093  | 6.936873166 | 3.58E-09    | 2.18E-07    |
| 228391_at   | 0.091319862  | 1.267942671 | 0.209836049 | 0.374430756 |
| 228392_at   | 0.16915087   | 4.186739292 | 9.64E-05    | 0.000713877 |
| 228393_s_at | 0.476287748  | 6.519759988 | 1.80E-08    | 6.84E-07    |
| 228394_at   | 0.048187455  | 1.33141595  | 0.188211482 | 0.346401605 |
| 228395_at   | -0.03401511  | -1.53830647 | 0.12935941  | 0.264204861 |
| 228396_at   | 0.351790751  | 5.258370913 | 2.14E-06    | 3.00E-05    |
| 228397_at   | 0.10236789   | 1.588064702 | 0.117656334 | 0.246036725 |
| 228398_at   | -0.06341586  | -1.4157399  | 0.162147879 | 0.311311669 |
| 228399_at   | -0.02551967  | -0.95358661 | 0.344212256 | 0.527001392 |
| 228400_at   | 0.076095813  | 1.737823586 | 0.087497825 | 0.196803856 |
| 228401_at   | -0.09274533  | -1.75560719 | 0.084384312 | 0.191291083 |
| 228402_at   | 0.222684996  | 4.666823773 | 1.82E-05    | 0.000176547 |
| 228403_at   | 0.110134899  | 1.348363363 | 0.182733155 | 0.339572149 |
| 228404_at   | -0.0069964   | -0.24545205 | 0.806964519 | 0.891358846 |
| 228405_at   | 0.0750171364 | 1.87606203  | 0.065632975 | 0.157778975 |
| 228406_at   | -0.02572224  | -0.74558652 | 0.458899245 | 0.637455238 |
| 228407_at   | -0.10087808  | -2.771681   | 0.007463949 | 0.027450528 |
| 228408_s_at | -0.17735549  | -2.86434693 | 0.00579217  | 0.02224488  |
| 228409_at   | 0.079893003  | 2.196525225 | 0.032025642 | 0.089752932 |
| 228410_at   | 0.050044255  | 1.318532785 | 0.192458512 | 0.352060682 |
| 228411_at   | 0.280619642  | 4.160899718 | 0.000105162 | 0.000768587 |
| 228412_at   | -0.08788903  | -2.3771501  | 0.020733175 | 0.063392422 |
| 228413_s_at | 0.056207675  | 1.358831997 | 0.179410216 | 0.335195074 |
| 228414_at   | -0.79372472  | -5.69015278 | 4.28E-07    | 8.01E-06    |
| 228415_at   | 0.64766603   | 6.062089049 | 1.04E-07    | 2.61E-06    |

|             |             |             |             |             |
|-------------|-------------|-------------|-------------|-------------|
| 228416_at   | -0.12643431 | -1.97189582 | 0.053350479 | 0.134162707 |
| 228417_at   | 0.049357036 | 0.932902724 | 0.354700396 | 0.537802623 |
| 228418_at   | 0.094198748 | 1.667477369 | 0.100758686 | 0.218799242 |
| 228419_at   | 0.081186934 | 2.256445833 | 0.027789803 | 0.080029763 |
| 228420_at   | 0.098326049 | 2.712899877 | 0.008743622 | 0.031272092 |
| 228421_s_at | 0.118615655 | 2.741493203 | 0.008097916 | 0.029380748 |
| 228422_at   | -0.32401483 | -5.98071787 | 1.42E-07    | 3.32E-06    |
| 228423_at   | -0.13299311 | -1.80041464 | 0.076945389 | 0.178123036 |
| 228424_at   | 0.043932822 | 1.385428748 | 0.171175334 | 0.324063542 |
| 228425_at   | -0.02256257 | -0.23319218 | 0.816425289 | 0.897385121 |
| 228426_at   | -0.02833879 | -0.80513561 | 0.42399812  | 0.605545137 |
| 228427_at   | -0.45729994 | -8.56040441 | 6.58E-12    | 4.52E-09    |
| 228428_at   | -0.02819728 | -0.63526413 | 0.527730485 | 0.695574793 |
| 228429_x_at | 0.144908923 | 3.209341261 | 0.002159805 | 0.009724562 |
| 228430_at   | -0.18261989 | -4.54431903 | 2.81E-05    | 0.000253783 |
| 228431_at   | -0.01489074 | -0.53118752 | 0.597297715 | 0.749654006 |
| 228432_at   | -0.01752459 | -0.36320535 | 0.71775918  | 0.834751201 |
| 228433_at   | 0.024807964 | 0.539517891 | 0.591574941 | 0.745347436 |
| 228434_at   | 0.320975983 | 4.562224634 | 2.64E-05    | 0.000241198 |
| 228435_at   | -0.0453187  | -1.32239813 | 0.191176752 | 0.35023863  |
| 228436_at   | 0.040779058 | 1.374467115 | 0.174533419 | 0.328620012 |
| 228437_at   | -0.05279249 | -1.34855134 | 0.182673077 | 0.339563632 |
| 228438_at   | 0.021404638 | 0.753667278 | 0.454068409 | 0.633308352 |
| 228439_at   | 0.004579089 | 0.093813956 | 0.925577159 | 0.960924883 |
| 228440_at   | 0.000859574 | 0.041377341 | 0.967135816 | 0.983329554 |
| 228441_s_at | 0.01895491  | 0.692504026 | 0.491357651 | 0.665426991 |
| 228442_at   | 0.113341824 | 2.011782687 | 0.04885088  | 0.125191    |
| 228443_s_at | 0.05123729  | 1.655951761 | 0.103080613 | 0.222715562 |
| 228444_at   | 0.12613578  | 2.603706894 | 0.011667106 | 0.039548639 |
| 228445_at   | -0.00503799 | -0.15431508 | 0.877891858 | 0.934650124 |
| 228446_at   | 0.217515746 | 3.968667464 | 0.000199814 | 0.001315764 |
| 228447_at   | 0.022562458 | 0.646559129 | 0.52044317  | 0.689460699 |
| 228448_at   | 0.065188947 | 1.473518995 | 0.145965914 | 0.288484881 |
| 228449_at   | -0.04855318 | -1.32712265 | 0.189618849 | 0.348283971 |
| 228450_at   | 0.317296358 | 4.216349322 | 8.72E-05    | 0.000656086 |
| 228451_at   | 0.054380006 | 1.596835277 | 0.11568465  | 0.242918666 |
| 228452_at   | 0.084683368 | 1.629239214 | 0.108630047 | 0.231759311 |
| 228453_at   | -0.24057288 | -4.97005284 | 6.15E-06    | 7.15E-05    |
| 228454_at   | 0.330141663 | 3.862052732 | 0.000283469 | 0.001774841 |
| 228455_at   | 0.180226637 | 2.564509928 | 0.012917004 | 0.042978466 |
| 228456_s_at | -0.13809521 | -1.90418045 | 0.061802753 | 0.150514339 |
| 228457_at   | 0.118569661 | 3.106129916 | 0.002921042 | 0.012546584 |
| 228458_at   | 0.049428462 | 1.509213323 | 0.136620639 | 0.274976339 |
| 228459_at   | -0.06369489 | -1.55084094 | 0.126327267 | 0.259640775 |
| 228460_at   | 0.152281565 | 4.251464543 | 7.73E-05    | 0.000594263 |
| 228461_at   | 0.132766992 | 3.384773888 | 0.001276579 | 0.006251686 |
| 228462_at   | 0.053004742 | 1.099559285 | 0.276023553 | 0.45244983  |
| 228463_at   | 0.009897591 | 0.322147633 | 0.748487973 | 0.854930684 |
| 228464_at   | -0.01322383 | -0.30845337 | 0.758831873 | 0.861205587 |
| 228465_at   | 0.02649544  | 0.43450072  | 0.665521592 | 0.798504416 |
| 228466_at   | 0.247740577 | 4.45888442  | 3.79E-05    | 0.000327314 |
| 228467_at   | -0.02524562 | -0.86969354 | 0.388018395 | 0.570700919 |
| 228468_at   | -0.064738   | -2.00771983 | 0.049293754 | 0.126075109 |
| 228469_at   | 0.133146309 | 2.011725266 | 0.048857116 | 0.125191    |
| 228470_at   | -0.03689353 | -0.93369583 | 0.35429446  | 0.537460643 |
| 228471_at   | 0.470537152 | 6.598530468 | 1.33E-08    | 5.54E-07    |
| 228472_at   | 0.085155322 | 2.953841789 | 0.00451281  | 0.018142271 |
| 228473_at   | -0.01009064 | -0.23781565 | 0.812854115 | 0.894899535 |
| 228474_s_at | -0.03027837 | -0.86304193 | 0.391634946 | 0.574432196 |
| 228475_at   | 0.038346628 | 1.26941659  | 0.209313797 | 0.373737603 |
| 228476_at   | 0.123210587 | 1.739862702 | 0.087136064 | 0.196155994 |
| 228477_at   | -0.08490359 | -1.52971854 | 0.131470133 | 0.267428119 |
| 228478_at   | 0.503231061 | 5.304908037 | 1.81E-06    | 2.61E-05    |
| 228479_at   | 0.033105723 | 0.732711296 | 0.466657015 | 0.644149262 |
| 228480_at   | -0.29679145 | -4.96756261 | 6.21E-06    | 7.20E-05    |
| 228481_at   | -0.02990926 | -1.03207126 | 0.306281975 | 0.486385746 |
| 228482_at   | 0.038424309 | 0.849271407 | 0.399188527 | 0.581484751 |
| 228483_s_at | 0.282523099 | 3.906232179 | 0.000245366 | 0.00156902  |
| 228484_s_at | -0.03993076 | -1.38951202 | 0.169937191 | 0.322323938 |
| 228485_s_at | 0.369990988 | 2.938168814 | 0.004715982 | 0.018801666 |
| 228486_at   | 0.427389441 | 3.705123934 | 0.000470222 | 0.002719705 |
| 228487_s_at | 0.40747857  | 3.985795078 | 0.000188817 | 0.001255185 |
| 228488_at   | -0.26510477 | -4.7730777  | 1.25E-05    | 0.000128312 |
| 228489_at   | 0.027065883 | 0.570996657 | 0.570186537 | 0.728720126 |
| 228490_at   | -0.05509314 | -1.37577415 | 0.174130382 | 0.328087479 |

|             |             |             |             |             |
|-------------|-------------|-------------|-------------|-------------|
| 228491_at   | 0.020730566 | 0.599934773 | 0.550863966 | 0.71365366  |
| 228492_at   | -0.10643617 | -1.07310823 | 0.287624343 | 0.465810521 |
| 228493_at   | -0.01286418 | -0.3716883  | 0.711466332 | 0.830421867 |
| 228494_at   | -0.66459482 | -6.72507259 | 8.13E-09    | 3.86E-07    |
| 228495_at   | -0.11110301 | -2.11165528 | 0.038992771 | 0.104721167 |
| 228496_s_at | -0.28797666 | -3.40365766 | 0.001205221 | 0.005956758 |
| 228497_at   | 0.131971784 | 1.769691798 | 0.081984162 | 0.187036047 |
| 228498_at   | 0.156362649 | 2.143116428 | 0.036269325 | 0.099055773 |
| 228499_at   | 0.159679233 | 4.545322807 | 2.80E-05    | 0.000253045 |
| 228500_at   | 0.046768083 | 1.669713718 | 0.100313145 | 0.218083666 |
| 228501_at   | 0.683811042 | 5.097902771 | 3.86E-06    | 4.88E-05    |
| 228502_at   | -0.36887831 | -6.46766666 | 2.20E-08    | 7.92E-07    |
| 228503_at   | -0.34086095 | -6.03824373 | 1.14E-07    | 2.80E-06    |
| 228504_at   | 0.011290811 | 0.204561638 | 0.838623875 | 0.910897249 |
| 228505_s_at | 0.196480387 | 3.827570773 | 0.000317098 | 0.001949879 |
| 228506_at   | -0.02770069 | -0.64883217 | 0.518983102 | 0.688403906 |
| 228507_at   | 0.033649252 | 1.05004024  | 0.298013295 | 0.477137285 |
| 228508_at   | 0.036257151 | 0.998182517 | 0.322297271 | 0.504151399 |
| 228509_at   | -0.44655687 | -5.14372034 | 3.27E-06    | 4.24E-05    |
| 228510_at   | 0.040716583 | 1.376211279 | 0.173995746 | 0.327897699 |
| 228511_s_at | 0.075656422 | 1.98500298  | 0.05183419  | 0.131154029 |
| 228512_at   | 0.152261136 | 3.562003405 | 0.000739013 | 0.003971893 |
| 228513_at   | 0.051669333 | 1.5522581   | 0.125988051 | 0.259238397 |
| 228514_at   | 0.025627366 | 0.655938225 | 0.514432625 | 0.684970144 |
| 228515_at   | -0.18204046 | -4.24192193 | 7.99E-05    | 0.000610436 |
| 228516_at   | 0.0136358   | 0.384337139 | 0.70212058  | 0.824058934 |
| 228517_at   | -0.22696784 | -4.24898591 | 7.80E-05    | 0.000598481 |
| 228518_at   | 0.065527266 | 1.711099286 | 0.092354919 | 0.204963768 |
| 228519_x_at | 0.173506253 | 4.090148867 | 0.000133405 | 0.000939956 |
| 228520_s_at | -0.00378386 | -0.08887121 | 0.929487471 | 0.963261543 |
| 228521_s_at | 0.028664461 | 0.743793203 | 0.459975316 | 0.638482368 |
| 228522_at   | 0.068320998 | 1.924520237 | 0.059151874 | 0.145341445 |
| 228523_at   | 0.072487865 | 1.137824866 | 0.259827093 | 0.433905419 |
| 228524_at   | -0.04279202 | -1.44791868 | 0.152972205 | 0.298436696 |
| 228525_at   | -0.27922329 | -4.12224531 | 0.000119786 | 0.00085889  |
| 228526_at   | -0.07346561 | -1.61201838 | 0.112334445 | 0.237598249 |
| 228527_s_at | -0.02347259 | -0.63466818 | 0.528116462 | 0.695848671 |
| 228528_at   | -0.01618122 | -0.15432481 | 0.877884217 | 0.934650124 |
| 228529_at   | 0.089223671 | 1.524041965 | 0.13288028  | 0.269487022 |
| 228530_at   | -0.18844365 | -4.0933256  | 0.000131993 | 0.000932359 |
| 228531_at   | 0.080617035 | 2.619118399 | 0.011206573 | 0.038261585 |
| 228532_at   | 0.310957199 | 2.993292901 | 0.004036844 | 0.016512412 |
| 228533_at   | -0.03469003 | -0.78458158 | 0.435861041 | 0.616459434 |
| 228534_s_at | 0.059746664 | 1.550250973 | 0.126468698 | 0.259832624 |
| 228535_at   | -0.13451634 | -3.37700731 | 0.001307074 | 0.006380746 |
| 228536_at   | -0.0552227  | -1.57153902 | 0.12144486  | 0.251849736 |
| 228537_at   | 0.087303849 | 2.761069691 | 0.0076814   | 0.028106856 |
| 228538_at   | 0.15027582  | 4.273086481 | 7.18E-05    | 0.000558238 |
| 228539_at   | -0.03299072 | -0.5551214  | 0.580925789 | 0.737096084 |
| 228540_at   | 0.214737645 | 3.027103162 | 0.003666563 | 0.015226357 |
| 228541_x_at | -0.05187605 | -1.16212113 | 0.249900246 | 0.422321646 |
| 228542_at   | -0.12718201 | -2.72547129 | 0.008454125 | 0.030458023 |
| 228543_at   | -0.24422701 | -4.33515783 | 5.81E-05    | 0.000466798 |
| 228544_s_at | -0.13108611 | -2.42384907 | 0.018464943 | 0.0577451   |
| 228545_at   | 0.186080325 | 2.897305771 | 0.005286307 | 0.020633311 |
| 228546_at   | -0.79181565 | -6.77812265 | 6.62E-09    | 3.37E-07    |
| 228547_at   | -0.29616455 | -2.88561182 | 0.005460911 | 0.021185679 |
| 228548_at   | 0.156178806 | 3.369633446 | 0.001336663 | 0.006503879 |
| 228549_at   | 0.232507816 | 3.626176074 | 0.000604103 | 0.003355111 |
| 228550_at   | -0.08944531 | -2.18995043 | 0.032523347 | 0.090826399 |
| 228551_at   | -0.37018789 | -5.14840119 | 3.21E-06    | 4.19E-05    |
| 228552_s_at | -0.01448559 | -0.46438538 | 0.644093381 | 0.783820869 |
| 228553_at   | -0.0597374  | -1.64665153 | 0.104985877 | 0.225904131 |
| 228554_at   | 0.149271622 | 2.890205314 | 0.005391697 | 0.02095901  |
| 228555_at   | 0.163264394 | 3.708806827 | 0.000464727 | 0.002693081 |
| 228556_at   | 0.039009579 | 1.157448134 | 0.251788107 | 0.424638268 |
| 228557_at   | 0.137580998 | 3.615740375 | 0.000624314 | 0.003452768 |
| 228558_at   | -0.00641489 | -0.1378654  | 0.890819707 | 0.941603946 |
| 228559_at   | 0.005939256 | 0.166953801 | 0.867981507 | 0.928444781 |
| 228560_at   | 0.287937864 | 4.7940512   | 1.16E-05    | 0.000120706 |
| 228561_at   | -0.05908138 | -0.85906696 | 0.393806159 | 0.57644389  |
| 228562_at   | 0.262959017 | 4.40987462  | 4.49E-05    | 0.000375858 |
| 228563_at   | 0.014436705 | 0.35625032  | 0.722933297 | 0.838099194 |
| 228564_at   | -0.10207863 | -3.01774819 | 0.003765716 | 0.015587419 |
| 228565_at   | -0.23266419 | -5.56775884 | 6.78E-07    | 1.16E-05    |

|             |             |             |             |             |
|-------------|-------------|-------------|-------------|-------------|
| 228566_at   | 0.081930969 | 2.04567622  | 0.045288022 | 0.118073287 |
| 228567_at   | 0.339651731 | 5.703563994 | 4.07E-07    | 7.68E-06    |
| 228568_at   | 0.145078427 | 3.530784996 | 0.00081459  | 0.004295655 |
| 228569_at   | -0.06393053 | -0.89110338 | 0.376520037 | 0.559329682 |
| 228570_at   | -0.19064906 | -3.38099366 | 0.001291337 | 0.006317725 |
| 228571_at   | 0.086898379 | 1.893717851 | 0.063205185 | 0.153220119 |
| 228572_at   | -0.05450039 | -1.5690646  | 0.122020457 | 0.252738484 |
| 228573_at   | 0.143255089 | 2.201786252 | 0.031632223 | 0.088839774 |
| 228574_at   | 0.4241626   | 4.667437199 | 1.82E-05    | 0.000176202 |
| 228575_at   | -0.00780952 | -0.20956922 | 0.8347312   | 0.90887801  |
| 228576_s_at | 0.025452125 | 0.446696153 | 0.656741919 | 0.792246502 |
| 228577_x_at | 0.03500027  | 0.98307116  | 0.329616266 | 0.51205152  |
| 228578_at   | -0.01664784 | -0.58939481 | 0.557863335 | 0.719705218 |
| 228579_at   | -0.77294634 | -7.5122304  | 3.82E-10    | 4.87E-08    |
| 228580_at   | 0.004309138 | 0.139729303 | 0.889353294 | 0.940719142 |
| 228581_at   | 0.34156256  | 3.768877067 | 0.000383321 | 0.002287237 |
| 228582_x_at | 0.002597173 | 0.029935543 | 0.97622024  | 0.988115119 |
| 228583_at   | 0.105393382 | 2.662603008 | 0.009995021 | 0.034892789 |
| 228584_at   | -0.10524687 | -1.22368373 | 0.22597195  | 0.393452314 |
| 228585_at   | 0.108687024 | 2.277446012 | 0.026427049 | 0.077043575 |
| 228586_at   | 0.014146254 | 0.39325584  | 0.695558453 | 0.819710951 |
| 228587_at   | 0.008104112 | 0.197245097 | 0.844318696 | 0.914393854 |
| 228588_s_at | -0.3381146  | -3.49278178 | 0.000916534 | 0.004740943 |
| 228589_at   | 0.011764181 | 0.312099673 | 0.756073238 | 0.85969788  |
| 228590_at   | 0.137488021 | 2.494011512 | 0.015474441 | 0.049905017 |
| 228591_at   | -0.04226424 | -1.47496954 | 0.145576595 | 0.287957387 |
| 228592_at   | -0.03763211 | -0.93162102 | 0.35535705  | 0.53845117  |
| 228593_at   | 0.108609131 | 3.616857591 | 0.000622119 | 0.003441912 |
| 228594_at   | 0.48533309  | 5.959232889 | 1.54E-07    | 3.53E-06    |
| 228595_at   | -0.01022768 | -0.3003964  | 0.764938559 | 0.864915096 |
| 228596_at   | 0.017557529 | 0.416330981 | 0.678689648 | 0.807475182 |
| 228597_at   | -0.10783776 | -2.09093132 | 0.040882607 | 0.108809283 |
| 228598_at   | 0.301560134 | 3.280087813 | 0.001750404 | 0.008158111 |
| 228599_at   | -0.06906797 | -1.83981913 | 0.070864254 | 0.167180387 |
| 228600_x_at | 0.059213543 | 0.610405324 | 0.543954849 | 0.708449078 |
| 228601_at   | 0.124557832 | 1.281117216 | 0.20520215  | 0.368397785 |
| 228602_at   | 0.137207368 | 3.552968474 | 0.00076017  | 0.00406519  |
| 228603_at   | 0.149376337 | 2.018649933 | 0.048110102 | 0.123741753 |
| 228604_at   | 0.069174879 | 1.304296733 | 0.197235128 | 0.358195471 |
| 228605_at   | 0.340397236 | 7.369431298 | 6.66E-10    | 7.09E-08    |
| 228606_at   | -0.11546737 | -1.43154072 | 0.157590413 | 0.304932708 |
| 228607_at   | 0.007036148 | 0.185950948 | 0.853125789 | 0.919475673 |
| 228608_at   | -0.15879665 | -1.91166054 | 0.060816375 | 0.148622345 |
| 228609_at   | -0.01993347 | -0.45962926 | 0.647484023 | 0.78614893  |
| 228610_at   | -0.06394656 | -1.64135469 | 0.106083752 | 0.227619906 |
| 228611_s_at | -0.12918737 | -3.44268942 | 0.001069527 | 0.005387051 |
| 228612_at   | -0.02682546 | -0.65911898 | 0.512402692 | 0.68320359  |
| 228613_at   | 0.197691359 | 2.801462064 | 0.006883555 | 0.025688029 |
| 228614_at   | -0.04697023 | -0.73061597 | 0.467926549 | 0.645008165 |
| 228615_at   | 0.013537514 | 0.31509171  | 0.75381197  | 0.858371499 |
| 228616_at   | 0.03846374  | 1.016088171 | 0.313766729 | 0.494843061 |
| 228617_at   | 0.189358166 | 2.545240108 | 0.013574987 | 0.0447579   |
| 228618_at   | 0.13066915  | 3.24983326  | 0.00191562  | 0.008792481 |
| 228619_x_at | -0.22878362 | -3.46710409 | 0.000992158 | 0.005061494 |
| 228620_at   | -0.03451658 | -0.93340531 | 0.354443123 | 0.537540196 |
| 228621_at   | 0.002410723 | 0.063833443 | 0.949320224 | 0.974035067 |
| 228622_s_at | 0.024802421 | 0.641826192 | 0.523490283 | 0.692184253 |
| 228623_at   | 0.025377403 | 0.442528398 | 0.659736962 | 0.794293373 |
| 228624_at   | 0.095724477 | 0.6366451   | 0.526836658 | 0.694976954 |
| 228625_at   | 0.030800968 | 0.798472736 | 0.427822275 | 0.609079801 |
| 228626_at   | 0.077691921 | 1.981318351 | 0.05225666  | 0.132051038 |
| 228627_at   | 0.049125348 | 1.794806003 | 0.077845438 | 0.179728165 |
| 228628_at   | 0.190593321 | 3.120638981 | 0.002800615 | 0.012127226 |
| 228629_s_at | 0.048634748 | 1.466924257 | 0.147746218 | 0.291106345 |
| 228630_at   | 0.009515175 | 0.207032878 | 0.83670233  | 0.909937961 |
| 228631_s_at | 0.083467065 | 2.16092423  | 0.034802692 | 0.095840897 |
| 228632_at   | -0.09070691 | -2.44710865 | 0.017420486 | 0.055072246 |
| 228633_s_at | 0.023835713 | 0.813797825 | 0.419057216 | 0.601390568 |
| 228634_s_at | 0.003025605 | 0.073113521 | 0.941964916 | 0.969917428 |
| 228635_at   | -0.4421007  | -4.36771414 | 5.19E-05    | 0.00042563  |
| 228636_at   | -0.02353277 | -0.56116261 | 0.576827607 | 0.734021793 |
| 228637_at   | 0.051432774 | 1.314720983 | 0.193728852 | 0.353748253 |
| 228638_at   | -0.10992807 | -1.35964068 | 0.179155454 | 0.334896376 |
| 228639_at   | 0.098883711 | 3.745144713 | 0.000413701 | 0.002440487 |
| 228640_at   | -0.57736909 | -4.71176731 | 1.56E-05    | 0.000154776 |

|             |             |             |             |             |
|-------------|-------------|-------------|-------------|-------------|
| 228641_at   | 0.039909994 | 1.539327254 | 0.129110328 | 0.26378868  |
| 228642_at   | 0.060602108 | 1.428858299 | 0.158357017 | 0.305992123 |
| 228643_at   | 0.091642032 | 2.685775726 | 0.00939943  | 0.033202602 |
| 228644_s_at | -0.07265844 | -2.10583207 | 0.039515952 | 0.105859073 |
| 228645_at   | -0.05614275 | -0.99707567 | 0.32282964  | 0.504789807 |
| 228646_at   | 0.029952118 | 0.692581347 | 0.491309468 | 0.66542223  |
| 228647_at   | 0.010708186 | 0.200327224 | 0.84191869  | 0.913210934 |
| 228648_at   | -0.04463943 | -1.19293129 | 0.237706819 | 0.40715902  |
| 228649_at   | 0.03260237  | 1.363448113 | 0.177959696 | 0.333352543 |
| 228650_at   | 0.020819258 | 0.437414864 | 0.663419316 | 0.796874219 |
| 228651_at   | -0.01372222 | -0.27039775 | 0.787804883 | 0.878830238 |
| 228652_at   | 0.111515623 | 2.027901141 | 0.047127482 | 0.121774419 |
| 228653_at   | -0.44469018 | -7.00863967 | 2.71E-09    | 1.79E-07    |
| 228654_at   | 0.02442522  | 0.449729017 | 0.654565981 | 0.79066631  |
| 228655_at   | 0.220838178 | 1.858232479 | 0.068164212 | 0.162439743 |
| 228656_at   | 0.201583032 | 2.330848483 | 0.023224885 | 0.069522207 |
| 228657_at   | -0.0148242  | -0.38131125 | 0.704352162 | 0.825654588 |
| 228658_at   | -0.24525419 | -2.6673641  | 0.009869907 | 0.034528835 |
| 228659_at   | -0.06026605 | -1.71283522 | 0.092032807 | 0.204429932 |
| 228660_x_at | -0.0785276  | -2.72924275 | 0.008369006 | 0.030185426 |
| 228661_s_at | -0.02520652 | -0.49626168 | 0.621567246 | 0.767598854 |
| 228662_at   | -0.13463303 | -2.07549145 | 0.042341865 | 0.111900104 |
| 228663_x_at | -0.05585602 | -1.60603947 | 0.113644228 | 0.239608805 |
| 228664_at   | 0.048522043 | 1.227064826 | 0.224708085 | 0.391923733 |
| 228665_at   | 0.153573136 | 2.661957055 | 0.010012107 | 0.034936062 |
| 228666_at   | 0.011681362 | 0.409442275 | 0.683708769 | 0.810914077 |
| 228667_at   | 0.105784734 | 1.235944944 | 0.221413357 | 0.388435946 |
| 228668_x_at | 0.038349969 | 1.129127222 | 0.263447926 | 0.438217014 |
| 228669_x_at | 0.077274687 | 2.19604559  | 0.032061723 | 0.089848414 |
| 228670_at   | 0.265838716 | 5.083267228 | 4.08E-06    | 5.09E-05    |
| 228671_at   | -0.00818249 | -0.26135485 | 0.794735791 | 0.883320865 |
| 228672_at   | -0.02443036 | -0.69556446 | 0.489452531 | 0.663768309 |
| 228673_s_at | -0.04872405 | -1.19348031 | 0.237493516 | 0.406918425 |
| 228674_s_at | 0.053573056 | 1.485532172 | 0.14276619  | 0.283969316 |
| 228675_at   | 0.023699407 | 0.90931461  | 0.366911085 | 0.550083536 |
| 228676_at   | 0.057292456 | 1.656469712 | 0.102975339 | 0.222563781 |
| 228677_s_at | 0.067129716 | 1.482478391 | 0.143574287 | 0.285069174 |
| 228678_at   | -0.05963994 | -1.43660216 | 0.156151774 | 0.302804491 |
| 228679_at   | 0.459467296 | 5.774727915 | 3.11E-07    | 6.16E-06    |
| 228680_at   | -0.25278555 | -3.49203167 | 0.000918663 | 0.00474811  |
| 228681_x_at | 0.017148621 | 0.443679447 | 0.65890923  | 0.793874247 |
| 228682_at   | -0.05222857 | -1.66616523 | 0.101020852 | 0.219283302 |
| 228683_s_at | 0.019744394 | 0.559791064 | 0.577756798 | 0.734785772 |
| 228684_at   | -0.08898547 | -2.1257356  | 0.037752611 | 0.10217645  |
| 228685_at   | -0.05399309 | -1.52716889 | 0.132102026 | 0.268347064 |
| 228686_at   | 0.2016031   | 3.909990294 | 0.000242362 | 0.001553593 |
| 228687_at   | 0.012178041 | 0.370454912 | 0.712380046 | 0.831085878 |
| 228688_at   | 0.054435892 | 1.672936475 | 0.099673919 | 0.217087075 |
| 228689_at   | 0.044414144 | 1.220946768 | 0.226998841 | 0.39450273  |
| 228690_s_at | -0.03520678 | -0.66479157 | 0.508793148 | 0.679871535 |
| 228691_at   | -0.07798925 | -2.15029223 | 0.035671955 | 0.097695518 |
| 228692_at   | 0.231002382 | 2.445732796 | 0.017480757 | 0.055219819 |
| 228693_at   | 0.359123962 | 6.002484537 | 1.31E-07    | 3.12E-06    |
| 228694_at   | -0.129851   | -2.56487878 | 0.012904697 | 0.042943909 |
| 228695_at   | -0.2775681  | -2.05937785 | 0.043912784 | 0.115232426 |
| 228696_at   | 0.165290136 | 2.633960178 | 0.010778778 | 0.037030143 |
| 228697_at   | 0.061168755 | 0.670028806 | 0.505472799 | 0.677151929 |
| 228698_at   | 0.138469423 | 1.583255647 | 0.118748871 | 0.247636454 |
| 228699_at   | -0.04047804 | -1.11516437 | 0.269335089 | 0.445028238 |
| 228700_at   | 0.222648909 | 4.229291205 | 8.34E-05    | 0.00063227  |
| 228701_at   | -0.18794402 | -3.72840116 | 0.000436508 | 0.002552454 |
| 228702_at   | 0.1807591   | 3.494740055 | 0.000910997 | 0.00471667  |
| 228703_at   | -0.06959966 | -1.84749104 | 0.06972854  | 0.165251242 |
| 228704_s_at | -0.03226023 | -0.93931904 | 0.351424955 | 0.534631995 |
| 228705_at   | 0.000323411 | 0.01050847  | 0.991651323 | 0.996131373 |
| 228706_s_at | 0.01345114  | 0.763642796 | 0.448145611 | 0.627656676 |
| 228707_at   | 0.04196468  | 1.306343259 | 0.19654303  | 0.357330612 |
| 228708_at   | -0.41634216 | -3.69512115 | 0.000485463 | 0.002794114 |
| 228709_at   | 0.006416039 | 0.105294822 | 0.916501675 | 0.955676454 |
| 228710_at   | -0.02604596 | -0.51219296 | 0.610442153 | 0.759433268 |
| 228711_at   | 0.065262388 | 1.278393258 | 0.206153941 | 0.369557255 |
| 228712_at   | -0.00201917 | -0.05960847 | 0.952670406 | 0.975747583 |
| 228713_s_at | -0.0063887  | -0.16636374 | 0.868443727 | 0.928706141 |
| 228714_at   | 0.017641984 | 0.421831943 | 0.674692098 | 0.804513843 |
| 228715_at   | -0.50662362 | -4.74621422 | 1.38E-05    | 0.000139239 |

|             |             |             |             |             |
|-------------|-------------|-------------|-------------|-------------|
| 228716_at   | -0.34990382 | -4.87039877 | 8.82E-06    | 9.62E-05    |
| 228717_at   | 0.024452485 | 0.700479346 | 0.486401572 | 0.660978443 |
| 228718_at   | 0.052803831 | 1.689159837 | 0.096506493 | 0.211892321 |
| 228719_at   | 0.032991185 | 0.463637417 | 0.644626101 | 0.784181493 |
| 228720_at   | 0.154092803 | 2.833823458 | 0.006300221 | 0.023855754 |
| 228721_at   | 0.075133088 | 1.698964957 | 0.094632526 | 0.208767694 |
| 228722_at   | 0.23944095  | 3.681145548 | 0.00050755  | 0.002902919 |
| 228723_at   | -0.25140954 | -3.88253242 | 0.000265148 | 0.001673619 |
| 228724_at   | -0.02021507 | -0.17142313 | 0.86448199  | 0.92653131  |
| 228725_x_at | 0.048437455 | 0.670516763 | 0.505164038 | 0.676933652 |
| 228726_at   | 0.369985983 | 5.406229995 | 1.24E-06    | 1.90E-05    |
| 228727_at   | 0.003121448 | 0.093127803 | 0.926119881 | 0.961287519 |
| 228728_at   | 0.009169586 | 0.230453754 | 0.8185423   | 0.898805741 |
| 228729_at   | -0.16030494 | -5.20929193 | 2.57E-06    | 3.48E-05    |
| 228730_s_at | 0.098922396 | 2.890564212 | 0.005386324 | 0.02094541  |
| 228731_at   | -0.99237512 | -6.41113963 | 2.74E-08    | 9.27E-07    |
| 228732_at   | -0.86030209 | -7.85121611 | 1.02E-10    | 2.14E-08    |
| 228733_at   | 0.06234161  | 1.593065171 | 0.116528906 | 0.24419327  |
| 228734_at   | -0.38065684 | -5.49165499 | 9.02E-07    | 1.47E-05    |
| 228735_s_at | 0.005632603 | 0.197000615 | 0.844509135 | 0.914474412 |
| 228736_at   | -0.00923441 | -0.2862183  | 0.775720944 | 0.871670359 |
| 228737_at   | -0.00259558 | -0.03389945 | 0.973072606 | 0.986381204 |
| 228738_at   | 0.186607199 | 4.417435043 | 4.37E-05    | 0.000367797 |
| 228739_at   | 0.219221226 | 4.031032353 | 0.000162504 | 0.001106099 |
| 228740_at   | -0.1003446  | -1.66304173 | 0.101647171 | 0.220439409 |
| 228741_s_at | -0.09803972 | -2.58931461 | 0.012112664 | 0.040797284 |
| 228742_at   | 0.00297514  | 0.056537058 | 0.95510642  | 0.976897527 |
| 228743_at   | -0.10113044 | -2.37859272 | 0.020659533 | 0.063195502 |
| 228744_at   | 0.050960646 | 2.46808605  | 0.016524405 | 0.052671615 |
| 228745_at   | -0.60829894 | -6.36278807 | 3.30E-08    | 1.07E-06    |
| 228746_s_at | -0.07580361 | -1.72119401 | 0.090494728 | 0.201744556 |
| 228747_at   | -0.18055049 | -3.83064589 | 0.000313949 | 0.001934514 |
| 228748_at   | 0.013643472 | 0.239233717 | 0.811759595 | 0.894495677 |
| 228749_at   | -0.06649051 | -0.81261045 | 0.419732429 | 0.60189571  |
| 228750_at   | 0.038507446 | 1.341484858 | 0.184941866 | 0.342346338 |
| 228751_at   | 0.104940591 | 1.519615323 | 0.13398824  | 0.271118867 |
| 228752_at   | -0.04576577 | -1.31632278 | 0.193194262 | 0.353037493 |
| 228753_at   | 0.010061609 | 0.276071903 | 0.783464694 | 0.876241344 |
| 228754_at   | -0.23985725 | -2.45962644 | 0.016880652 | 0.05365027  |
| 228755_at   | 0.077890328 | 1.4020411   | 0.16618105  | 0.317242472 |
| 228756_at   | 0.06462949  | 2.001206869 | 0.05001091  | 0.127464362 |
| 228757_at   | -0.19149754 | -4.82904956 | 1.02E-05    | 0.000108812 |
| 228758_at   | 0.468707828 | 3.953620918 | 0.000209982 | 0.001372407 |
| 228759_at   | 0.047402334 | 1.784516993 | 0.079519437 | 0.182784688 |
| 228760_at   | -0.02041339 | -0.30517202 | 0.761317096 | 0.862586203 |
| 228761_at   | -0.35593037 | -7.1171095  | 1.78E-09    | 1.34E-07    |
| 228762_at   | 0.229238986 | 5.093738156 | 3.92E-06    | 4.94E-05    |
| 228763_at   | -0.02933791 | -0.48382103 | 0.630317075 | 0.774117359 |
| 228764_s_at | -0.01968838 | -0.42181209 | 0.67470651  | 0.804513843 |
| 228765_at   | 0.167656197 | 3.310473053 | 0.001598064 | 0.007555344 |
| 228766_at   | 0.494252867 | 2.571285728 | 0.012692606 | 0.04237379  |
| 228767_at   | -0.02015153 | -0.55815515 | 0.578866037 | 0.735659544 |
| 228768_at   | 0.224274571 | 3.821244608 | 0.000323669 | 0.001984026 |
| 228769_at   | -0.01060811 | -0.30469898 | 0.761675578 | 0.862797306 |
| 228770_at   | 0.338841819 | 4.926772881 | 7.20E-06    | 8.17E-05    |
| 228771_at   | 0.053703952 | 0.615399161 | 0.540675245 | 0.706186422 |
| 228772_at   | 0.318306781 | 3.923760982 | 0.000231656 | 0.001496122 |
| 228773_at   | -0.16546345 | -4.52317428 | 3.03E-05    | 0.000270392 |
| 228774_at   | 0.078021963 | 1.985162136 | 0.051816008 | 0.131130295 |
| 228775_at   | -0.25478364 | -4.00956952 | 0.000174514 | 0.001174077 |
| 228776_at   | 0.386348841 | 4.439454551 | 4.05E-05    | 0.000345694 |
| 228777_at   | 0.062813639 | 1.402651041 | 0.165999842 | 0.316950696 |
| 228778_at   | 0.058139529 | 1.44639818  | 0.153396454 | 0.298979256 |
| 228779_at   | 0.001919682 | 0.062675429 | 0.950238381 | 0.974507302 |
| 228780_at   | 0.359706899 | 5.39876349  | 1.27E-06    | 1.94E-05    |
| 228781_at   | -0.01146745 | -0.32167257 | 0.748846045 | 0.855128135 |
| 228782_at   | -0.05568219 | -1.7885711  | 0.078856294 | 0.181549839 |
| 228783_at   | 0.137573652 | 2.86862294  | 0.005724103 | 0.022030795 |
| 228784_at   | 0.017462407 | 0.336977228 | 0.737338691 | 0.847473017 |
| 228785_at   | 0.25436001  | 3.152622093 | 0.002551384 | 0.011193329 |
| 228786_at   | 0.115636663 | 2.605085415 | 0.011625222 | 0.039440857 |
| 228787_s_at | -0.07575869 | -2.09932072 | 0.040108184 | 0.107086144 |
| 228788_at   | -1.18051982 | -6.74904284 | 7.41E-09    | 3.63E-07    |
| 228789_at   | -0.12251613 | -4.10997308 | 0.000124826 | 0.000889894 |
| 228790_at   | -0.26579928 | -5.34165272 | 1.58E-06    | 2.33E-05    |

|             |             |             |             |             |
|-------------|-------------|-------------|-------------|-------------|
| 228791_at   | 0.076611402 | 2.382869465 | 0.020442588 | 0.062673287 |
| 228792_at   | -0.11777017 | -2.95109695 | 0.004547794 | 0.018254896 |
| 228793_at   | -0.01283962 | -0.23364493 | 0.816075412 | 0.897110867 |
| 228794_at   | -0.00791786 | -0.2229794  | 0.824327412 | 0.902408835 |
| 228795_at   | -1.10966763 | -7.91682547 | 7.93E-11    | 1.85E-08    |
| 228796_at   | -0.50764304 | -4.8973376  | 8.00E-06    | 8.87E-05    |
| 228797_at   | -0.00969305 | -0.34077919 | 0.734489274 | 0.845437315 |
| 228798_x_at | 0.023063248 | 0.531790178 | 0.596882837 | 0.749405753 |
| 228799_at   | 0.007703934 | 0.229161914 | 0.819541463 | 0.899438806 |
| 228800_x_at | 0.042784098 | 0.95776248  | 0.342119687 | 0.525051098 |
| 228801_at   | -0.12081461 | -3.55573139 | 0.00075364  | 0.004040022 |
| 228802_at   | 0.054058704 | 1.412493666 | 0.163096712 | 0.312663246 |
| 228803_at   | -0.12055032 | -2.71733952 | 0.008640363 | 0.030989094 |
| 228804_at   | -0.29574386 | -5.17261264 | 2.94E-06    | 3.89E-05    |
| 228805_at   | -0.20992189 | -5.01731212 | 5.18E-06    | 6.20E-05    |
| 228806_at   | 0.089977826 | 2.020781478 | 0.047882148 | 0.123268948 |
| 228807_at   | 0.370238117 | 3.988758596 | 0.000186974 | 0.001244602 |
| 228808_s_at | -0.00985731 | -0.28118463 | 0.779559849 | 0.873907963 |
| 228809_at   | -0.00707698 | -0.2184422  | 0.827843991 | 0.904419762 |
| 228810_at   | -0.01182327 | -0.35042122 | 0.727279836 | 0.840768572 |
| 228811_at   | 0.090789352 | 2.265778839 | 0.027176668 | 0.078649202 |
| 228812_at   | 0.001780099 | 0.048825785 | 0.961224263 | 0.980218016 |
| 228813_at   | 0.333030669 | 6.491096866 | 2.01E-08    | 7.42E-07    |
| 228814_at   | 0.02417692  | 0.708311837 | 0.481561353 | 0.656797485 |
| 228815_s_at | 0.075990768 | 1.924936546 | 0.059098643 | 0.145234607 |
| 228816_at   | 0.1236983   | 2.202866418 | 0.031551977 | 0.088664546 |
| 228817_at   | -0.19449796 | -2.88888138 | 0.005411562 | 0.02102343  |
| 228818_at   | 0.24753582  | 5.28262209  | 1.96E-06    | 2.79E-05    |
| 228819_at   | 0.014288073 | 0.500356861 | 0.618698885 | 0.765952648 |
| 228820_at   | -0.05249629 | -1.98489223 | 0.051846846 | 0.131171199 |
| 228821_at   | 0.017332237 | 0.341092826 | 0.734254384 | 0.845232251 |
| 228822_s_at | 0.047831828 | 0.646386499 | 0.520554146 | 0.68952596  |
| 228823_at   | -0.00252281 | -0.05114812 | 0.959381544 | 0.979165543 |
| 228824_s_at | -0.13803703 | -1.60754749 | 0.113312712 | 0.239079016 |
| 228825_at   | -0.00679616 | -0.16716416 | 0.867816734 | 0.928444781 |
| 228826_at   | -0.05618407 | -1.48794004 | 0.142131543 | 0.283047095 |
| 228827_at   | -0.25895427 | -3.60953214 | 0.000636641 | 0.003509221 |
| 228828_at   | -0.06587206 | -1.69839503 | 0.094740626 | 0.208887422 |
| 228829_at   | 0.181425025 | 2.403805048 | 0.019409734 | 0.060173408 |
| 228830_s_at | 0.001362943 | 0.027996009 | 0.977760515 | 0.988756034 |
| 228831_s_at | -0.69423617 | -6.91411251 | 3.91E-09    | 2.32E-07    |
| 228832_at   | -0.02987728 | -0.7182956  | 0.475430887 | 0.651358242 |
| 228833_s_at | -0.04986439 | -1.51725047 | 0.134583144 | 0.27207626  |
| 228834_at   | 0.126043015 | 0.780003361 | 0.438529894 | 0.618980451 |
| 228835_at   | -0.23296377 | -4.87608719 | 8.64E-06    | 9.45E-05    |
| 228836_at   | -0.02142191 | -0.6452403  | 0.521291301 | 0.690166269 |
| 228837_at   | 0.433202716 | 7.622186713 | 2.49E-10    | 3.75E-08    |
| 228838_at   | 0.001031788 | 0.034205731 | 0.972829412 | 0.986268903 |
| 228839_s_at | 0.230748757 | 3.971960732 | 0.000197653 | 0.001304222 |
| 228840_at   | -0.00025506 | -0.00830439 | 0.993402355 | 0.997061131 |
| 228841_at   | -0.04210792 | -0.720423   | 0.474130268 | 0.650154331 |
| 228842_at   | -0.06080629 | -1.82948363 | 0.072418836 | 0.169997567 |
| 228843_at   | -0.02324607 | -0.38503107 | 0.701609181 | 0.823776889 |
| 228844_at   | -0.18915746 | -5.48350759 | 9.29E-07    | 1.51E-05    |
| 228845_at   | -0.02096884 | -0.52373793 | 0.602437182 | 0.753438437 |
| 228846_at   | 0.023982902 | 0.642454919 | 0.523084963 | 0.691806334 |
| 228847_at   | 0.067411632 | 1.532119243 | 0.130877354 | 0.266549886 |
| 228848_at   | -0.08060244 | -2.53977687 | 0.013766982 | 0.045284388 |
| 228849_at   | -0.07743937 | -2.23960283 | 0.028927328 | 0.082735193 |
| 228850_s_at | -0.4134715  | -6.63757253 | 1.14E-08    | 4.94E-07    |
| 228851_s_at | -0.36670639 | -4.81148378 | 1.09E-05    | 0.000114603 |
| 228852_at   | -0.06860926 | -1.73093468 | 0.088729198 | 0.198751269 |
| 228853_at   | 0.259128877 | 4.830562934 | 1.02E-05    | 0.000108318 |
| 228854_at   | 1.069316631 | 7.036872045 | 2.43E-09    | 1.66E-07    |
| 228855_at   | -0.21313904 | -3.42986204 | 0.001112437 | 0.005566275 |
| 228856_at   | -0.01573938 | -0.43432748 | 0.665646653 | 0.798547275 |
| 228857_at   | -0.20886964 | -3.58999304 | 0.000676973 | 0.003691917 |
| 228858_at   | 0.066114163 | 2.165746065 | 0.034414617 | 0.095000498 |
| 228859_at   | 0.092650606 | 2.550632257 | 0.013387873 | 0.044269686 |
| 228860_at   | 0.028146279 | 0.899423761 | 0.372110275 | 0.555363246 |
| 228861_at   | 0.155722316 | 5.56512965  | 6.85E-07    | 1.17E-05    |
| 228862_at   | 0.042513961 | 1.212581767 | 0.230158487 | 0.398105236 |
| 228863_at   | -0.04335674 | -0.70374689 | 0.484379064 | 0.659252341 |
| 228864_at   | -0.06811411 | -1.54924437 | 0.126710301 | 0.260197426 |
| 228865_at   | -0.05765679 | -1.33464128 | 0.187159412 | 0.34515674  |



|             |             |             |             |             |
|-------------|-------------|-------------|-------------|-------------|
| 228866_at   | 0.197357882 | 4.294729882 | 6.67E-05    | 0.000523878 |
| 228867_at   | -0.09698193 | -1.32396608 | 0.190658656 | 0.349515981 |
| 228868_x_at | -0.08349037 | -1.79550223 | 0.077733235 | 0.179519106 |
| 228869_at   | 0.167241114 | 3.67692271  | 0.00051441  | 0.002933523 |
| 228870_at   | -0.05405941 | -1.45369899 | 0.151367737 | 0.296213631 |
| 228871_at   | -0.06742671 | -1.86602963 | 0.067047304 | 0.160402448 |
| 228872_at   | -0.03053206 | -0.99926133 | 0.321778955 | 0.503728504 |
| 228873_at   | 0.025553282 | 0.603832541 | 0.54828681  | 0.711581895 |
| 228874_at   | -0.0779844  | -1.73596203 | 0.08782917  | 0.197367956 |
| 228875_at   | 0.08776477  | 2.072953471 | 0.042586012 | 0.112379195 |
| 228876_at   | -0.02172011 | -0.43121795 | 0.667893031 | 0.79988947  |
| 228877_at   | 0.145932564 | 3.879526093 | 0.000267764 | 0.001687859 |
| 228878_s_at | -0.0487939  | -1.47330659 | 0.146022991 | 0.288533889 |
| 228879_at   | 0.351602988 | 7.66970007  | 2.07E-10    | 3.35E-08    |
| 228880_at   | 0.064282299 | 1.228048497 | 0.22434136  | 0.391464608 |
| 228881_at   | -0.0692448  | -1.83448288 | 0.07166335  | 0.168673816 |
| 228882_at   | 0.021219159 | 0.34297751  | 0.732843429 | 0.84409591  |
| 228883_at   | 0.010468062 | 0.280923575 | 0.77975909  | 0.874065545 |
| 228884_at   | -0.0089815  | -0.3059061  | 0.760760901 | 0.862278199 |
| 228885_at   | 0.007116883 | 0.301750981 | 0.763910809 | 0.864277805 |
| 228886_at   | 0.126367008 | 2.80704054  | 0.006779575 | 0.025359286 |
| 228887_x_at | 0.014614964 | 0.391616071 | 0.696763213 | 0.820503307 |
| 228888_at   | -0.07231738 | -2.02728166 | 0.047192735 | 0.121908428 |
| 228889_at   | 0.088592319 | 2.222785729 | 0.030103924 | 0.085362895 |
| 228890_at   | 0.216387787 | 4.390683514 | 4.80E-05    | 0.000397559 |
| 228891_at   | 0.29023243  | 2.496866232 | 0.015362587 | 0.049615893 |
| 228892_at   | -0.10999491 | -3.24418185 | 0.001948066 | 0.008914907 |
| 228893_at   | -0.03597758 | -0.92170434 | 0.360464221 | 0.543682865 |
| 228894_at   | -0.00117615 | -0.03361628 | 0.973297448 | 0.986519618 |
| 228895_s_at | -0.04912899 | -1.67849634 | 0.09857897  | 0.2151952   |
| 228896_at   | 0.067314446 | 2.140777579 | 0.03646591  | 0.099434682 |
| 228897_at   | 0.114460043 | 3.269967905 | 0.001804112 | 0.008364796 |
| 228898_s_at | 0.030541473 | 0.834274285 | 0.407516485 | 0.589830536 |
| 228899_at   | 0.024143857 | 0.418892603 | 0.676826954 | 0.806095943 |
| 228900_at   | 0.165345215 | 3.910612482 | 0.000241868 | 0.001551317 |
| 228901_at   | -0.07635151 | -2.34544393 | 0.022412063 | 0.067495952 |
| 228902_at   | 0.026204161 | 0.84274102  | 0.402801888 | 0.585146171 |
| 228903_at   | 0.063925825 | 1.725630127 | 0.089687103 | 0.200454891 |
| 228904_at   | -0.04878139 | -1.23795109 | 0.220673972 | 0.387610484 |
| 228905_at   | -0.18478298 | -2.2593     | 0.027601012 | 0.079612245 |
| 228906_at   | 0.051185258 | 1.069720888 | 0.28913398  | 0.467459242 |
| 228907_at   | 0.079929215 | 1.670240378 | 0.100208455 | 0.21792206  |
| 228908_s_at | -0.0357645  | -0.56563209 | 0.573804668 | 0.731745435 |
| 228909_at   | -0.11344612 | -1.58086964 | 0.119293953 | 0.248380403 |
| 228910_at   | 0.225462642 | 4.027163143 | 0.000164609 | 0.00111719  |
| 228911_at   | 0.008606174 | 0.261141529 | 0.79489949  | 0.883398714 |
| 228912_at   | -0.05729497 | -1.45076208 | 0.152181297 | 0.297265381 |
| 228913_at   | 0.113334738 | 2.058290627 | 0.044020573 | 0.115428741 |
| 228914_at   | -0.0452682  | -1.12577078 | 0.264854723 | 0.43978519  |
| 228915_at   | -1.08682757 | -7.8486636  | 1.03E-10    | 2.14E-08    |
| 228916_at   | 0.20211941  | 3.710387381 | 0.000462387 | 0.002682374 |
| 228917_at   | -0.11086548 | -3.13876759 | 0.002656679 | 0.011588159 |
| 228918_at   | 0.042880851 | 0.651097394 | 0.517530218 | 0.687129333 |
| 228919_at   | -0.04624321 | -1.00767966 | 0.317753525 | 0.499017518 |
| 228920_at   | 0.154413631 | 4.03495195  | 0.000160399 | 0.001093756 |
| 228921_at   | -0.05320483 | -1.11898482 | 0.267715139 | 0.4429903   |
| 228922_at   | -0.03521366 | -1.1071744  | 0.272745271 | 0.448804552 |
| 228923_at   | 0.074373018 | 2.309577847 | 0.024456459 | 0.072451815 |
| 228924_s_at | -0.01252351 | -0.35172635 | 0.726305864 | 0.840194173 |
| 228925_at   | -0.10988332 | -1.93301206 | 0.058074122 | 0.143296317 |
| 228926_s_at | -0.07203992 | -1.65559502 | 0.103153173 | 0.222818831 |
| 228927_at   | 0.338685739 | 5.251760958 | 2.20E-06    | 3.06E-05    |
| 228928_x_at | 0.358762384 | 5.877210398 | 2.11E-07    | 4.51E-06    |
| 228929_at   | 0.086579062 | 2.233969    | 0.029316892 | 0.083576612 |
| 228930_at   | -0.04957169 | -0.98184142 | 0.330216696 | 0.51278705  |
| 228931_at   | -0.238219   | -5.13718923 | 3.35E-06    | 4.33E-05    |
| 228932_at   | 0.104171986 | 2.73379019  | 0.008267418 | 0.029886554 |
| 228933_at   | 0.153755185 | 2.168931846 | 0.034160301 | 0.094466656 |
| 228934_x_at | -0.05386181 | -1.37127739 | 0.175520005 | 0.330037869 |
| 228935_at   | -0.26675061 | -5.30934351 | 1.78E-06    | 2.57E-05    |
| 228936_at   | -0.02135046 | -0.67023579 | 0.505341816 | 0.67706138  |
| 228937_at   | 0.198798134 | 1.472326084 | 0.146286696 | 0.288952755 |
| 228938_at   | -0.01754294 | -0.53851885 | 0.592259892 | 0.745797236 |
| 228939_at   | 0.018783953 | 0.540775351 | 0.590713345 | 0.744652379 |
| 228940_at   | 0.015544642 | 0.474369755 | 0.637000225 | 0.778772679 |

|             |             |             |             |             |
|-------------|-------------|-------------|-------------|-------------|
| 228941_at   | 0.141678307 | 2.863750425 | 0.005801725 | 0.022272006 |
| 228942_s_at | -0.19978868 | -3.55048606 | 0.000766083 | 0.004090048 |
| 228943_at   | -0.19848268 | -5.34929416 | 1.53E-06    | 2.27E-05    |
| 228944_at   | 0.191696768 | 4.893365191 | 8.12E-06    | 8.98E-05    |
| 228945_s_at | -0.07922291 | -2.36532082 | 0.021345937 | 0.064950477 |
| 228946_at   | 0.24086015  | 1.614772943 | 0.111735132 | 0.23666666  |
| 228947_x_at | 0.034899543 | 0.925816041 | 0.358340952 | 0.541412232 |
| 228948_at   | -0.36871665 | -4.33743825 | 5.76E-05    | 0.000463849 |
| 228949_at   | 0.480573898 | 4.333927541 | 5.83E-05    | 0.000468254 |
| 228950_s_at | 0.312071982 | 2.44014771  | 0.01772735  | 0.05584484  |
| 228951_at   | 0.011073285 | 0.305148643 | 0.76133481  | 0.862586203 |
| 228952_at   | 0.002303236 | 0.072889516 | 0.942142403 | 0.969988442 |
| 228953_at   | -0.00906967 | -0.21196088 | 0.83287349  | 0.907585977 |
| 228954_at   | 0.004722547 | 0.115349552 | 0.90856265  | 0.951623751 |
| 228955_at   | 0.096445466 | 1.334030586 | 0.187358271 | 0.345297318 |
| 228956_at   | 0.185674149 | 1.050653243 | 0.297733936 | 0.476792499 |
| 228957_at   | 0.074435914 | 2.121917123 | 0.038085486 | 0.102853135 |
| 228958_at   | 0.015812141 | 0.331703449 | 0.741297308 | 0.849859151 |
| 228959_at   | -0.31476831 | -5.12589742 | 3.49E-06    | 4.49E-05    |
| 228960_at   | 0.08123385  | 1.726761398 | 0.089482103 | 0.200126814 |
| 228961_at   | 0.192201174 | 3.59682303  | 0.000662605 | 0.003627285 |
| 228962_at   | -0.11446684 | -3.32311364 | 0.00153845  | 0.00731607  |
| 228963_at   | 0.004458991 | 0.119528352 | 0.905265856 | 0.949828589 |
| 228964_at   | 0.012954148 | 0.274535749 | 0.784639031 | 0.877138256 |
| 228965_s_at | -0.07153779 | -2.50971144 | 0.014868261 | 0.048232003 |
| 228966_at   | -0.06876808 | -2.09880854 | 0.040155095 | 0.10718578  |
| 228967_at   | -0.00354078 | -0.05519988 | 0.956167104 | 0.977484008 |
| 228968_at   | 0.025567899 | 0.554767385 | 0.581166374 | 0.737254828 |
| 228969_at   | -0.03000939 | -0.72554533 | 0.471006899 | 0.647500472 |
| 228970_at   | -0.32212599 | -4.99244298 | 5.67E-06    | 6.68E-05    |
| 228971_at   | -0.11696445 | -2.3426052  | 0.022568137 | 0.067892781 |
| 228972_at   | 0.087957385 | 1.978909617 | 0.052534433 | 0.132595521 |
| 228973_at   | -0.45418929 | -4.8206155  | 1.05E-05    | 0.000111543 |
| 228974_at   | 0.261582921 | 5.218823826 | 2.48E-06    | 3.38E-05    |
| 228975_at   | -0.06147653 | -1.92710823 | 0.058821624 | 0.144649281 |
| 228976_at   | 0.10963752  | 2.302473453 | 0.024880553 | 0.073435587 |
| 228977_at   | 0.139021768 | 1.549620502 | 0.126619979 | 0.260095606 |
| 228978_at   | 0.088211381 | 2.387309202 | 0.020219533 | 0.062140791 |
| 228979_at   | 0.04470587  | 0.776060436 | 0.44083611  | 0.621195846 |
| 228980_at   | 0.448862465 | 4.209924747 | 8.91E-05    | 0.000668123 |
| 228981_at   | -0.06976192 | -2.03750654 | 0.046125612 | 0.119816673 |
| 228982_s_at | 0.006339062 | 0.206805747 | 0.836878897 | 0.910019262 |
| 228983_at   | -0.19141336 | -4.75946178 | 1.31E-05    | 0.000133782 |
| 228984_at   | 0.166020192 | 1.262858929 | 0.211644791 | 0.376635701 |
| 228985_at   | -0.07477247 | -2.23856808 | 0.028998533 | 0.082891106 |
| 228986_at   | -0.64095586 | -7.5802055  | 2.93E-10    | 4.16E-08    |
| 228987_at   | -1.09268451 | -7.18133317 | 1.38E-09    | 1.16E-07    |
| 228988_at   | -0.08718779 | -1.49934821 | 0.139154833 | 0.27874626  |
| 228989_at   | -0.02799567 | -0.63598037 | 0.527266806 | 0.695246373 |
| 228990_at   | 0.249497068 | 4.931733747 | 7.07E-06    | 8.05E-05    |
| 228991_at   | 0.076291741 | 1.510117892 | 0.13639011  | 0.274660784 |
| 228992_at   | 0.387483653 | 6.001088479 | 1.32E-07    | 3.14E-06    |
| 228993_s_at | 0.126356107 | 2.691063953 | 0.009268143 | 0.032832264 |
| 228994_at   | 0.14900208  | 4.543858022 | 2.81E-05    | 0.000254039 |
| 228995_at   | 0.02003794  | 0.605451565 | 0.54721813  | 0.710772863 |
| 228996_at   | 0.080944741 | 0.914829708 | 0.364032307 | 0.547266879 |
| 228997_at   | -0.08315542 | -2.54711159 | 0.013509628 | 0.044581871 |
| 228998_at   | 0.18878595  | 4.538857706 | 2.86E-05    | 0.000257957 |
| 228999_at   | 0.189267611 | 2.724469267 | 0.008476874 | 0.030520296 |
| 229000_at   | -0.04696469 | -1.30078459 | 0.198427134 | 0.359600401 |
| 229001_at   | 0.132628008 | 3.073852882 | 0.003206541 | 0.013587893 |
| 229002_at   | -0.12150356 | -2.57074531 | 0.012710372 | 0.042426765 |
| 229003_x_at | -0.01622067 | -0.54330375 | 0.588982708 | 0.743519339 |
| 229004_at   | -0.02434743 | -0.65831229 | 0.512917109 | 0.683618614 |
| 229005_at   | -0.09643419 | -3.03703729 | 0.003563942 | 0.014859566 |
| 229006_at   | 0.140495485 | 3.162874931 | 0.002475996 | 0.01090541  |
| 229007_at   | -0.28054875 | -2.07275656 | 0.042605006 | 0.112416042 |
| 229008_at   | 0.017591598 | 0.352787979 | 0.72551394  | 0.839604055 |
| 229009_at   | 0.180453316 | 3.560790737 | 0.00074182  | 0.003984753 |
| 229010_at   | 0.049076149 | 1.117178482 | 0.268480207 | 0.443927537 |
| 229011_at   | 0.181047822 | 2.383840459 | 0.020393617 | 0.062551064 |
| 229012_at   | 0.339421261 | 2.653743037 | 0.010231712 | 0.035513798 |
| 229013_at   | -0.0149635  | -0.48509811 | 0.629416387 | 0.773566523 |
| 229014_at   | 0.195066987 | 3.996900896 | 0.000182    | 0.001217842 |
| 229015_at   | -0.14969999 | -3.0767279  | 0.003180089 | 0.013488142 |

|             |             |             |             |             |
|-------------|-------------|-------------|-------------|-------------|
| 229016_s_at | -0.11091204 | -3.14138185 | 0.002636503 | 0.011513642 |
| 229017_s_at | -0.09032547 | -1.59605944 | 0.115857983 | 0.243192314 |
| 229018_at   | 0.026412792 | 0.711977069 | 0.479305629 | 0.654752174 |
| 229019_at   | -0.80117159 | -7.43871967 | 5.09E-10    | 5.86E-08    |
| 229020_x_at | -0.0692846  | -2.2944659  | 0.025366379 | 0.0745544   |
| 229021_at   | -0.09005941 | -3.30580995 | 0.001620601 | 0.007645003 |
| 229022_at   | 0.123585859 | 2.424189031 | 0.018449281 | 0.057708236 |
| 229023_at   | -0.05961617 | -1.46264818 | 0.148909646 | 0.292736425 |
| 229024_at   | -0.31077876 | -5.14112162 | 3.30E-06    | 4.28E-05    |
| 229025_s_at | -0.31225887 | -4.96248947 | 6.33E-06    | 7.32E-05    |
| 229026_at   | -0.05989699 | -0.38886932 | 0.698783045 | 0.82177754  |
| 229027_at   | 0.079130016 | 1.987830639 | 0.051511968 | 0.130530867 |
| 229028_s_at | -0.00305684 | -0.05920456 | 0.952990731 | 0.975874387 |
| 229029_at   | -1.33771773 | -7.30718903 | 8.48E-10    | 8.45E-08    |
| 229030_at   | -0.02416996 | -0.63535285 | 0.527673039 | 0.695574793 |
| 229031_at   | 0.019120356 | 0.628095498 | 0.532383085 | 0.699371168 |
| 229032_at   | -0.45833052 | -7.22607123 | 1.16E-09    | 1.04E-07    |
| 229033_s_at | 0.312320003 | 5.830569575 | 2.52E-07    | 5.19E-06    |
| 229034_at   | -0.06029599 | -1.63047674 | 0.108367704 | 0.231347481 |
| 229035_s_at | 0.081407759 | 2.223669505 | 0.030041057 | 0.085222478 |
| 229036_at   | 0.202021805 | 4.228864219 | 8.35E-05    | 0.000632974 |
| 229037_at   | -0.0566156  | -1.79440631 | 0.077909913 | 0.179824916 |
| 229038_at   | -0.03629842 | -1.27940628 | 0.205799592 | 0.36918859  |
| 229039_at   | -1.02703866 | -5.73742535 | 3.58E-07    | 6.92E-06    |
| 229040_at   | -0.04324978 | -0.99198186 | 0.325287224 | 0.507443074 |
| 229041_s_at | 0.136030927 | 2.765805753 | 0.007583637 | 0.027810243 |
| 229042_s_at | -0.07265423 | -1.54267583 | 0.128295926 | 0.262560972 |
| 229043_at   | 0.087727149 | 1.238442147 | 0.220493265 | 0.387471763 |
| 229044_at   | -0.03824537 | -1.24175364 | 0.219277493 | 0.386108176 |
| 229045_at   | 0.011754208 | 0.307650494 | 0.759439719 | 0.861487383 |
| 229046_s_at | 0.023562847 | 0.6346822   | 0.528107379 | 0.695848671 |
| 229047_at   | -0.00912911 | -0.25992938 | 0.79582987  | 0.884075179 |
| 229048_at   | -0.0068558  | -0.17419078 | 0.862316268 | 0.925106996 |
| 229049_at   | -0.05266905 | -1.36451104 | 0.177626964 | 0.33286529  |
| 229050_s_at | 0.150113798 | 2.375875882 | 0.020798415 | 0.063561459 |
| 229051_at   | 0.001713347 | 0.059702479 | 0.952595854 | 0.975747583 |
| 229052_at   | -0.03051559 | -0.85004391 | 0.398762418 | 0.581091329 |
| 229053_at   | 0.33543264  | 5.184819396 | 2.81E-06    | 3.74E-05    |
| 229054_at   | 0.031016251 | 0.914790497 | 0.364052723 | 0.547266879 |
| 229055_at   | 0.075078431 | 2.31512355  | 0.024129889 | 0.071681808 |
| 229056_at   | -0.01794228 | -0.43665933 | 0.6639641   | 0.79727783  |
| 229057_at   | -1.36884603 | -6.4221567  | 2.62E-08    | 8.96E-07    |
| 229058_at   | -0.12020879 | -2.36624399 | 0.02129754  | 0.064829701 |
| 229059_at   | 0.009175914 | 0.247254874 | 0.805575712 | 0.890595639 |
| 229060_at   | 0.175799294 | 2.819709868 | 0.006548779 | 0.024629979 |
| 229061_s_at | 0.316166833 | 3.739283119 | 0.000421552 | 0.002477645 |
| 229062_at   | 0.026294958 | 0.766673877 | 0.446354913 | 0.626292607 |
| 229063_s_at | 0.046287113 | 1.06579112  | 0.290892209 | 0.469283276 |
| 229064_s_at | 0.002591616 | 0.046346188 | 0.963192001 | 0.981137201 |
| 229065_at   | -0.85449583 | -6.06292416 | 1.04E-07    | 2.60E-06    |
| 229066_at   | 0.189352426 | 5.028728484 | 4.97E-06    | 5.99E-05    |
| 229067_at   | -0.22618264 | -1.81265382 | 0.07501148  | 0.174663778 |
| 229068_at   | -0.03901079 | -0.94143763 | 0.350347774 | 0.533465391 |
| 229069_at   | 0.028952653 | 1.218742427 | 0.227828375 | 0.395329466 |
| 229070_at   | 0.015067897 | 0.366504386 | 0.715309513 | 0.833135189 |
| 229071_at   | -0.13844239 | -3.44324789 | 0.001067695 | 0.005379036 |
| 229072_at   | 0.649335087 | 7.255023133 | 1.04E-09    | 9.60E-08    |
| 229073_at   | 0.111643867 | 2.729680339 | 0.008359181 | 0.030152422 |
| 229074_at   | 0.091653681 | 2.271759983 | 0.026790058 | 0.077817579 |
| 229075_at   | 0.070207989 | 3.042850093 | 0.003505144 | 0.014654058 |
| 229076_s_at | 0.002422646 | 0.053615383 | 0.957424071 | 0.978260883 |
| 229077_at   | 0.063647489 | 1.735164655 | 0.087971416 | 0.197618422 |
| 229078_s_at | -0.07750142 | -1.90001292 | 0.062358181 | 0.151600033 |
| 229079_at   | -0.07224003 | -1.85908544 | 0.068041269 | 0.162250582 |
| 229080_at   | -0.09305021 | -1.98575799 | 0.051747985 | 0.131024925 |
| 229081_at   | 0.055185878 | 1.580273333 | 0.119430492 | 0.248595201 |
| 229082_at   | 0.116911076 | 3.772032797 | 0.000379447 | 0.002267143 |
| 229083_at   | -0.07246759 | -1.1934999  | 0.237485906 | 0.406918425 |
| 229084_at   | -0.28760955 | -4.77516238 | 1.24E-05    | 0.000127536 |
| 229085_at   | -0.23719323 | -2.26469391 | 0.027247322 | 0.078814149 |
| 229086_at   | 0.197825011 | 5.081850857 | 4.10E-06    | 5.12E-05    |
| 229087_s_at | -0.02746934 | -0.91245095 | 0.365272193 | 0.548579489 |
| 229088_at   | 0.004684052 | 0.124629427 | 0.901243721 | 0.947370035 |
| 229089_at   | -0.04351306 | -1.44964796 | 0.152490816 | 0.297655465 |
| 229090_at   | 0.080730694 | 1.884691384 | 0.064436703 | 0.155530629 |

|             |             |             |             |             |
|-------------|-------------|-------------|-------------|-------------|
| 229091_s_at | 0.020612564 | 0.574921064 | 0.567546805 | 0.727160192 |
| 229092_at   | 0.161994513 | 3.703639957 | 0.000472454 | 0.00273014  |
| 229093_at   | 0.022552367 | 0.691534692 | 0.491961912 | 0.665942627 |
| 229094_at   | -0.01743261 | -0.53435024 | 0.595121959 | 0.748057674 |
| 229095_s_at | 0.06744168  | 2.227974785 | 0.029736453 | 0.084513931 |
| 229096_at   | 0.015427298 | 0.467896359 | 0.641595253 | 0.78227186  |
| 229097_at   | 0.257019601 | 2.730191404 | 0.008347719 | 0.030120803 |
| 229098_s_at | -0.04061693 | -1.36594209 | 0.17717975  | 0.332214935 |
| 229099_at   | 0.128404589 | 2.5519276   | 0.013343272 | 0.044150258 |
| 229100_s_at | -0.03330656 | -1.11777164 | 0.268228806 | 0.443593909 |
| 229101_at   | -0.46779402 | -6.44241995 | 2.43E-08    | 8.47E-07    |
| 229102_at   | -0.07187131 | -2.3887742  | 0.020146411 | 0.061950143 |
| 229103_at   | -0.15610348 | -4.4282256  | 4.21E-05    | 0.000356981 |
| 229104_s_at | 0.119800983 | 2.637509207 | 0.010678712 | 0.036762672 |
| 229105_at   | 0.007667745 | 0.167571752 | 0.867497487 | 0.928285546 |
| 229106_at   | -0.21782085 | -3.64264976 | 0.000573465 | 0.003217336 |
| 229107_at   | 0.137504125 | 3.08390789  | 0.003114918 | 0.013258279 |
| 229108_at   | -0.32502146 | -4.81820511 | 1.06E-05    | 0.000112325 |
| 229109_s_at | -0.06656801 | -1.86956767 | 0.066545615 | 0.159492499 |
| 229110_at   | -0.51546172 | -4.82206898 | 1.05E-05    | 0.000111094 |
| 229111_at   | -0.02650492 | -0.49089938 | 0.625332064 | 0.770429789 |
| 229112_at   | -0.05737957 | -0.98205849 | 0.330110657 | 0.512659167 |
| 229113_s_at | 0.157324301 | 3.665474339 | 0.000533458 | 0.003024781 |
| 229114_at   | 0.64491415  | 5.448395702 | 1.06E-06    | 1.67E-05    |
| 229115_at   | -0.02219507 | -0.33637064 | 0.737793647 | 0.847843297 |
| 229116_at   | -0.80596351 | -7.12706304 | 1.71E-09    | 1.31E-07    |
| 229117_s_at | 0.096857212 | 2.141490154 | 0.036405918 | 0.099295331 |
| 229118_at   | -0.52729161 | -5.02208007 | 5.10E-06    | 6.11E-05    |
| 229119_s_at | -0.04872001 | -0.44132702 | 0.660601345 | 0.794905773 |
| 229120_s_at | 0.291419725 | 4.746801408 | 1.37E-05    | 0.000139011 |
| 229121_at   | 0.063661108 | 2.062858827 | 0.043569213 | 0.11450722  |
| 229122_x_at | -0.01295888 | -0.31785357 | 0.751726581 | 0.85717621  |
| 229123_at   | 0.057074638 | 1.624166577 | 0.109710786 | 0.233474331 |
| 229124_at   | -0.0099743  | -0.33878766 | 0.735981379 | 0.846449341 |
| 229125_at   | 0.041452374 | 0.742388982 | 0.460818923 | 0.63917453  |
| 229126_at   | -0.18810003 | -3.29808655 | 0.001658589 | 0.007795474 |
| 229127_at   | 0.302505611 | 3.666744521 | 0.000531312 | 0.003015575 |
| 229128_s_at | -0.33292581 | -2.57032965 | 0.012724053 | 0.042461115 |
| 229129_at   | -0.14215193 | -2.6788946  | 0.00957281  | 0.03367134  |
| 229130_at   | 0.217672386 | 4.022789924 | 0.000167019 | 0.00113063  |
| 229131_at   | -0.00058931 | -0.01822348 | 0.985522511 | 0.99310365  |
| 229132_at   | -0.06510835 | -2.23727013 | 0.02908807  | 0.083088586 |
| 229133_s_at | 0.30455052  | 4.050955152 | 0.000152073 | 0.001045444 |
| 229134_at   | 0.037779056 | 1.088067979 | 0.281022538 | 0.458207197 |
| 229135_at   | -0.17643384 | -3.58831523 | 0.000680547 | 0.003708696 |
| 229136_s_at | -0.00819379 | -0.22027539 | 0.826422734 | 0.903808343 |
| 229137_at   | -0.00062207 | -0.01898281 | 0.98491934  | 0.992738275 |
| 229138_at   | 0.023804297 | 0.608410593 | 0.545267681 | 0.709373364 |
| 229139_at   | -0.66684684 | -6.05269135 | 1.08E-07    | 2.68E-06    |
| 229140_at   | 0.027455572 | 1.19873892  | 0.235457491 | 0.404468851 |
| 229141_at   | 0.032602096 | 0.713496078 | 0.478372509 | 0.653905006 |
| 229142_s_at | -0.00625756 | -0.18469231 | 0.854108454 | 0.920135351 |
| 229143_at   | 0.139225583 | 2.54211841  | 0.013684394 | 0.045045514 |
| 229144_at   | -0.19882741 | -3.28403601 | 0.001729862 | 0.008076547 |
| 229145_at   | 0.223613935 | 3.095345336 | 0.003013677 | 0.012898607 |
| 229146_at   | -0.04414933 | -1.74025866 | 0.08706596  | 0.196057434 |
| 229147_at   | -0.01379055 | -0.58960576 | 0.557722816 | 0.719647876 |
| 229148_at   | -0.04582826 | -1.28682848 | 0.203217193 | 0.36602518  |
| 229149_at   | 0.006127851 | 0.197252596 | 0.844312855 | 0.914393854 |
| 229150_at   | 0.034756746 | 0.737062981 | 0.464026653 | 0.641773818 |
| 229151_at   | 1.441714532 | 6.539438558 | 1.67E-08    | 6.48E-07    |
| 229152_at   | -0.0443878  | -1.32928393 | 0.18890938  | 0.347309145 |
| 229153_at   | 0.19784261  | 5.344922988 | 1.56E-06    | 2.30E-05    |
| 229154_at   | 0.030511042 | 1.050263725 | 0.297911427 | 0.477020125 |
| 229155_at   | -0.21640908 | -4.05738091 | 0.000148848 | 0.00102782  |
| 229156_s_at | -0.4380394  | -6.76564303 | 6.95E-09    | 3.46E-07    |
| 229157_at   | -0.28137556 | -5.85661292 | 2.28E-07    | 4.78E-06    |
| 229158_at   | 0.029040068 | 0.961080392 | 0.340463011 | 0.523336899 |
| 229159_at   | -0.20726534 | -2.97826391 | 0.004212369 | 0.017126929 |
| 229160_at   | 0.110693036 | 2.287863963 | 0.025773239 | 0.075531645 |
| 229161_at   | -0.00421272 | -0.09465911 | 0.924908724 | 0.960651653 |
| 229162_s_at | -0.05290777 | -1.33223954 | 0.187942409 | 0.346115137 |
| 229163_at   | -0.12037453 | -1.92699723 | 0.058835758 | 0.144676076 |
| 229164_s_at | -0.19591923 | -3.80829474 | 0.000337532 | 0.002055174 |
| 229165_at   | -0.02963325 | -0.91765556 | 0.362562893 | 0.545747406 |

|             |               |             |             |             |
|-------------|---------------|-------------|-------------|-------------|
| 229166_s_at | -0.01250808   | -0.3850083  | 0.701625957 | 0.823776889 |
| 229167_at   | 0.135777569   | 3.918972761 | 0.000235326 | 0.00151479  |
| 229168_at   | -0.03445582   | -0.84665858 | 0.400631833 | 0.582944959 |
| 229169_at   | 0.532264153   | 3.574579954 | 0.000710494 | 0.003840055 |
| 229170_s_at | 0.715719597   | 3.77344067  | 0.00037773  | 0.002258094 |
| 229171_at   | 0.049798281   | 1.323054995 | 0.190959575 | 0.349926824 |
| 229172_at   | 0.207363905   | 4.642619662 | 1.99E-05    | 0.000190112 |
| 229173_at   | -0.09476842   | -1.75074491 | 0.085226317 | 0.192847681 |
| 229174_at   | 0.016502535   | 0.328116927 | 0.743993457 | 0.851726622 |
| 229175_at   | 0.00438585    | 0.163340724 | 0.870812515 | 0.930237659 |
| 229176_at   | -0.13962228   | -3.61253078 | 0.000630658 | 0.003481824 |
| 229177_at   | 0.213804295   | 4.569160224 | 2.58E-05    | 0.000236516 |
| 229178_at   | 0.257176538   | 5.054392718 | 4.53E-06    | 5.57E-05    |
| 229179_at   | -0.06840252   | -1.71171778 | 0.092240048 | 0.204778312 |
| 229180_at   | 0.012164332   | 0.345011744 | 0.731321553 | 0.843246563 |
| 229181_s_at | 0.002539401   | 0.087536408 | 0.930543767 | 0.96375731  |
| 229182_at   | -0.04026222   | -1.14690017 | 0.256086865 | 0.429553902 |
| 229183_at   | -0.0105241    | -0.37879278 | 0.706211512 | 0.826778492 |
| 229184_at   | -0.09791095   | -2.62921438 | 0.010913922 | 0.03741002  |
| 229185_at   | 0.026753306   | 0.670095452 | 0.505430622 | 0.677136396 |
| 229186_s_at | -0.02139572   | -0.57098589 | 0.570193787 | 0.728720126 |
| 229187_at   | 0.076120598   | 0.834192872 | 0.407561982 | 0.589830536 |
| 229188_s_at | -0.05823802   | -1.80555311 | 0.076128442 | 0.176561097 |
| 229189_s_at | -0.03886302   | -0.99065234 | 0.325930718 | 0.508105396 |
| 229190_at   | -0.06549851   | -1.31432471 | 0.193861278 | 0.353909082 |
| 229191_at   | 0.064105605   | 1.768298134 | 0.082219096 | 0.187409386 |
| 229192_s_at | -0.35736517   | -4.08589637 | 0.000135318 | 0.000951485 |
| 229193_at   | 0.027676841   | 0.292640367 | 0.770831352 | 0.868830415 |
| 229194_at   | 0.386068247   | 3.492459172 | 0.000917449 | 0.004743481 |
| 229195_at   | -0.00438007   | -0.12942515 | 0.897464724 | 0.945020226 |
| 229196_at   | 0.013418534   | 0.409226348 | 0.683866326 | 0.811000209 |
| 229197_at   | 0.015278309   | 0.344751561 | 0.731516144 | 0.843361783 |
| 229198_at   | -0.02659372   | -0.89365651 | 0.375163384 | 0.558309912 |
| 229199_at   | 0.03301266    | 1.108045642 | 0.272371951 | 0.448351802 |
| 229200_at   | 0.022222164   | 0.975863877 | 0.333145625 | 0.515848813 |
| 229201_at   | -1.14521412   | -5.78053444 | 3.04E-07    | 6.06E-06    |
| 229202_at   | -0.51590383   | -6.164142   | 7.07E-08    | 1.93E-06    |
| 229203_at   | -0.02892859   | -1.0851489  | 0.282302387 | 0.459590266 |
| 229204_at   | 0.036814776   | 0.795943824 | 0.429279121 | 0.610308349 |
| 229205_at   | 0.053667123   | 1.359215201 | 0.17928946  | 0.335053503 |
| 229206_at   | 0.339283258   | 5.68873167  | 4.30E-07    | 8.04E-06    |
| 229207_x_at | -0.05466619   | -1.4714213  | 0.146530368 | 0.289242312 |
| 229208_at   | 0.041510999   | 1.345047972 | 0.183795222 | 0.340987719 |
| 229209_at   | -0.00133958   | -0.03974603 | 0.968430789 | 0.983974646 |
| 229210_at   | 0.061886578   | 1.719877949 | 0.090735476 | 0.202140965 |
| 229211_at   | -0.13685362   | -2.95192126 | 0.004537261 | 0.018218726 |
| 229212_at   | -0.09532436   | -2.05928945 | 0.04392154  | 0.115236672 |
| 229213_at   | -0.0357618    | -0.72558937 | 0.470980095 | 0.64749773  |
| 229214_at   | 0.058483661   | 1.957968931 | 0.055003079 | 0.137483088 |
| 229215_at   | 0.005390637   | 0.191572198 | 0.848739958 | 0.916935403 |
| 229216_s_at | -0.02472205   | -0.75476549 | 0.453414154 | 0.632695935 |
| 229217_at   | -0.03482691   | -1.08322925 | 0.283146251 | 0.460510654 |
| 229218_at   | 0.093019643   | 2.303704223 | 0.024806618 | 0.073265752 |
| 229219_s_at | -0.05321951   | -1.85529391 | 0.068589201 | 0.163208848 |
| 229220_x_at | 0.057248535   | 1.414557304 | 0.162493041 | 0.311849793 |
| 229221_at   | 0.070526496   | 1.70660531  | 0.093193115 | 0.20636113  |
| 229222_at   | 0.531166752   | 5.426314016 | 1.15E-06    | 1.79E-05    |
| 229223_at   | -0.08990184   | -1.85116965 | 0.069189436 | 0.164280139 |
| 229224_x_at | -0.03042205   | -1.52701717 | 0.132139704 | 0.268399202 |
| 229225_at   | 0.038948441   | 0.909014054 | 0.367068387 | 0.550245534 |
| 229226_at   | 0.010572335   | 0.290585041 | 0.772395218 | 0.869777921 |
| 229227_at   | 0.320267905   | 6.357883853 | 3.36E-08    | 1.08E-06    |
| 229228_at   | 0.440823431   | 3.21445274  | 0.002127441 | 0.009601088 |
| 229229_at   | -0.0050223    | -0.14545082 | 0.884854386 | 0.9383907   |
| 229230_at   | 0.000951268   | 0.03275004  | 0.973985279 | 0.986835428 |
| 229231_at   | -0.0071101497 | -1.64922746 | 0.104455317 | 0.225098463 |
| 229232_at   | -0.03982214   | -1.1632939  | 0.249428052 | 0.421836014 |
| 229233_at   | -0.03362186   | -0.64731367 | 0.519958259 | 0.689104279 |
| 229234_at   | -0.26809984   | -6.30232118 | 4.16E-08    | 1.28E-06    |
| 229235_at   | -0.00578295   | -0.12669916 | 0.899612501 | 0.946244733 |
| 229236_s_at | -0.092014     | -2.25840386 | 0.027660166 | 0.079742261 |
| 229237_s_at | 0.074488169   | 2.395224128 | 0.019827281 | 0.061166622 |
| 229238_at   | -0.06175217   | -1.26377353 | 0.211318534 | 0.376264857 |
| 229239_x_at | -0.01478901   | -0.37930081 | 0.705836296 | 0.826635459 |
| 229240_at   | 0.031761769   | 0.776388162 | 0.440644152 | 0.621003672 |

|             |             |             |             |             |
|-------------|-------------|-------------|-------------|-------------|
| 229241_at   | 0.084274162 | 2.302157053 | 0.024899591 | 0.073482073 |
| 229242_at   | -0.1017824  | -3.01747119 | 0.003768689 | 0.015596838 |
| 229243_at   | -0.27542695 | -5.52338276 | 8.01E-07    | 1.34E-05    |
| 229244_at   | 0.004531708 | 0.104722553 | 0.916953792 | 0.955947161 |
| 229245_at   | -0.3182185  | -4.04499862 | 0.000155122 | 0.001063298 |
| 229246_at   | -0.15126772 | -3.3942972  | 0.001240107 | 0.006105855 |
| 229247_at   | 0.009046675 | 0.259736007 | 0.795978319 | 0.884152975 |
| 229248_at   | -0.03714075 | -1.23398116 | 0.222138891 | 0.389158846 |
| 229249_at   | 0.020912335 | 0.63632555  | 0.527043415 | 0.695051873 |
| 229250_at   | 0.050000818 | 1.292270978 | 0.201339027 | 0.363491973 |
| 229251_s_at | 0.029997042 | 0.911963829 | 0.36552643  | 0.548854563 |
| 229252_at   | 0.045066029 | 1.11153913  | 0.270878631 | 0.446670397 |
| 229253_at   | 0.019793508 | 0.480556128 | 0.632622271 | 0.775839815 |
| 229254_at   | -0.28137653 | -3.1402977  | 0.002644853 | 0.011544463 |
| 229255_x_at | -0.02563533 | -0.75605505 | 0.452646598 | 0.631952728 |
| 229256_at   | -0.52503815 | -3.33798257 | 0.001471017 | 0.007051667 |
| 229257_at   | 0.073601688 | 2.060822905 | 0.043769874 | 0.114926457 |
| 229258_at   | -0.01596866 | -0.453168   | 0.652102312 | 0.789183475 |
| 229259_at   | 0.882371221 | 5.027909175 | 4.99E-06    | 6.01E-05    |
| 229260_at   | -0.03183982 | -0.83518989 | 0.40700502  | 0.589336412 |
| 229261_at   | 0.089907984 | 1.282542209 | 0.204705544 | 0.367834664 |
| 229262_at   | -0.15653917 | -2.90435154 | 0.005183617 | 0.020294893 |
| 229263_at   | 0.043199265 | 1.408386013 | 0.164303474 | 0.314558122 |
| 229264_at   | 0.141825939 | 2.03588442  | 0.046293502 | 0.12016405  |
| 229265_at   | 0.076094747 | 1.385067081 | 0.171285333 | 0.324175664 |
| 229266_at   | 0.183303263 | 2.220884505 | 0.030239561 | 0.085644263 |
| 229267_at   | -0.32419866 | -6.30078837 | 4.18E-08    | 1.28E-06    |
| 229268_at   | 0.181567342 | 5.68998058  | 4.28E-07    | 8.01E-06    |
| 229269_x_at | -0.35880615 | -6.22862015 | 5.52E-08    | 1.59E-06    |
| 229270_x_at | -0.10068915 | -3.76414011 | 0.000389209 | 0.002317417 |
| 229271_x_at | -0.06080527 | -2.75589832 | 0.007789471 | 0.028453375 |
| 229272_at   | 0.156829449 | 2.017939985 | 0.048186234 | 0.123887659 |
| 229273_at   | 0.552910063 | 5.288528336 | 1.92E-06    | 2.74E-05    |
| 229274_at   | 0.200907488 | 3.363451888 | 0.001361955 | 0.006603633 |
| 229275_at   | -0.00012572 | -0.00290588 | 0.997691318 | 0.998862879 |
| 229276_at   | -0.0369894  | -1.16952534 | 0.246929798 | 0.418608904 |
| 229277_at   | -0.02148062 | -0.65452805 | 0.515333957 | 0.685577937 |
| 229278_at   | -0.00869541 | -0.21222807 | 0.832666012 | 0.907469503 |
| 229279_at   | 0.092718566 | 2.218537236 | 0.030407763 | 0.0859953   |
| 229280_s_at | -0.02240907 | -0.64585161 | 0.520898083 | 0.689817978 |
| 229281_at   | 0.661231691 | 8.319312733 | 1.67E-11    | 7.31E-09    |
| 229282_at   | 0.042332067 | 0.981613746 | 0.330327941 | 0.51287642  |
| 229283_at   | -0.02679521 | -0.73969302 | 0.462441047 | 0.640532303 |
| 229284_at   | -0.03010454 | -0.63325966 | 0.529029288 | 0.696540683 |
| 229285_at   | 0.005814181 | 0.1095551   | 0.913136749 | 0.953977118 |
| 229286_at   | -0.43455059 | -6.3289789  | 3.75E-08    | 1.18E-06    |
| 229287_at   | -0.19867339 | -2.3574156  | 0.021764398 | 0.065963277 |
| 229288_at   | -0.50968241 | -5.62229989 | 5.53E-07    | 9.82E-06    |
| 229289_at   | -0.22252088 | -5.70280612 | 4.08E-07    | 7.69E-06    |
| 229290_at   | -0.0570019  | -1.18157469 | 0.242150185 | 0.412650655 |
| 229291_at   | 0.002904847 | 0.072466399 | 0.942477662 | 0.970221856 |
| 229292_at   | -0.04085035 | -1.6456611  | 0.105190457 | 0.226226505 |
| 229293_at   | 0.064794705 | 1.86072221  | 0.067805875 | 0.161801494 |
| 229294_at   | -0.98936252 | -6.68669417 | 9.44E-09    | 4.30E-07    |
| 229295_at   | -0.29298307 | -5.38037718 | 1.36E-06    | 2.06E-05    |
| 229296_at   | 0.103576224 | 2.16654944  | 0.034350329 | 0.094864048 |
| 229297_at   | 0.016273593 | 0.524169747 | 0.602138712 | 0.753212699 |
| 229298_at   | -0.13035596 | -2.83157463 | 0.006339233 | 0.023981125 |
| 229299_at   | 0.432995429 | 3.879638851 | 0.000267666 | 0.001687476 |
| 229300_at   | -1.04663057 | -5.80515066 | 2.77E-07    | 5.60E-06    |
| 229301_at   | -0.05244243 | -1.12529296 | 0.265055423 | 0.44005561  |
| 229302_at   | -0.43227279 | -4.43419061 | 4.13E-05    | 0.000350733 |
| 229303_at   | 0.015076439 | 0.358191737 | 0.72148768  | 0.837199206 |
| 229304_s_at | 0.027587071 | 0.742171446 | 0.46094969  | 0.639278931 |
| 229305_at   | 0.006216787 | 0.176917677 | 0.860183465 | 0.923745086 |
| 229306_at   | 0.027374413 | 0.94773192  | 0.34716018  | 0.530201372 |
| 229307_at   | 0.197962005 | 2.986489073 | 0.004115446 | 0.016784769 |
| 229308_at   | 0.025389086 | 0.649161797 | 0.51877155  | 0.688253355 |
| 229309_at   | -0.60581657 | -5.01075764 | 5.31E-06    | 6.32E-05    |
| 229310_at   | -0.41827931 | -5.34713022 | 1.54E-06    | 2.28E-05    |
| 229311_at   | 0.084765724 | 1.814306485 | 0.07475349  | 0.17420393  |
| 229312_s_at | 0.371388698 | 5.712478924 | 3.94E-07    | 7.48E-06    |
| 229313_at   | -0.05664607 | -1.34554987 | 0.18363414  | 0.340764697 |
| 229314_at   | 0.049083684 | 1.161708189 | 0.250066663 | 0.422500351 |
| 229315_at   | 0.137448246 | 1.739254486 | 0.087243838 | 0.196351965 |

|             |             |             |             |             |
|-------------|-------------|-------------|-------------|-------------|
| 229316_at   | 0.039135758 | 1.171996913 | 0.245943915 | 0.417396729 |
| 229317_at   | 0.20552776  | 3.194049439 | 0.002259414 | 0.010105856 |
| 229318_at   | -0.10862306 | -2.33501424 | 0.022990257 | 0.068944546 |
| 229319_at   | -0.252198   | -5.15650981 | 3.12E-06    | 4.09E-05    |
| 229320_at   | -0.09991717 | -2.67143419 | 0.009764087 | 0.034228299 |
| 229321_s_at | -0.03192343 | -0.54081341 | 0.590687273 | 0.744640517 |
| 229322_at   | 0.02357633  | 0.323806843 | 0.747237801 | 0.854106184 |
| 229323_at   | 0.035879969 | 0.955228226 | 0.343388629 | 0.52632981  |
| 229324_x_at | 0.087936161 | 1.297758022 | 0.199458665 | 0.361039126 |
| 229325_at   | 0.161457217 | 3.741113359 | 0.000419086 | 0.002465417 |
| 229326_at   | -0.01406616 | -0.27807841 | 0.781931548 | 0.875346697 |
| 229327_s_at | -0.0335638  | -0.52493096 | 0.601612732 | 0.752870838 |
| 229328_at   | -0.40620926 | -7.71339579 | 1.75E-10    | 2.98E-08    |
| 229329_s_at | -0.04733268 | -1.58651899 | 0.118006609 | 0.246596127 |
| 229330_at   | -0.06634124 | -1.77105803 | 0.081754395 | 0.186684668 |
| 229331_at   | 0.604064111 | 2.867762666 | 0.005737737 | 0.022079469 |
| 229332_at   | 0.022201323 | 0.582482465 | 0.562477654 | 0.723382099 |
| 229333_at   | -0.15656239 | -3.30580593 | 0.00162062  | 0.007645003 |
| 229334_at   | 0.096553649 | 1.479367526 | 0.144401185 | 0.286338487 |
| 229335_at   | 0.081822076 | 1.862394408 | 0.067566096 | 0.161416057 |
| 229336_at   | -0.14995236 | -3.81490188 | 0.000330389 | 0.002018284 |
| 229337_at   | -0.22493378 | -6.33383669 | 3.68E-08    | 1.17E-06    |
| 229338_at   | 0.069695398 | 2.049347932 | 0.044915886 | 0.117315223 |
| 229339_at   | 0.002596209 | 0.072817926 | 0.942199127 | 0.970024496 |
| 229340_at   | -0.00624467 | -0.11950688 | 0.905282793 | 0.949828589 |
| 229341_at   | 0.075194396 | 1.750579602 | 0.085255066 | 0.192902968 |
| 229342_at   | 0.250728952 | 4.785692586 | 1.20E-05    | 0.000123563 |
| 229343_at   | -0.07329532 | -1.43155936 | 0.157585095 | 0.304932708 |
| 229344_x_at | 0.210533475 | 4.446387198 | 3.95E-05    | 0.000339092 |
| 229345_at   | -0.01967913 | -0.47265528 | 0.638215831 | 0.779853504 |
| 229346_at   | 0.041604973 | 1.146121174 | 0.256406401 | 0.42997692  |
| 229347_at   | -0.20447638 | -4.62347022 | 2.13E-05    | 0.000201305 |
| 229348_at   | 0.070565232 | 2.649967412 | 0.010334122 | 0.035802527 |
| 229349_at   | -0.11996823 | -2.70783068 | 0.008862905 | 0.031614731 |
| 229350_x_at | 0.182301634 | 4.713657169 | 1.55E-05    | 0.000153911 |
| 229351_at   | 0.100717985 | 3.1760312   | 0.002382319 | 0.01055523  |
| 229352_at   | 0.051276586 | 1.516123881 | 0.134867284 | 0.27244118  |
| 229353_s_at | 0.395061803 | 6.061117011 | 1.05E-07    | 2.61E-06    |
| 229354_at   | -0.03566065 | -0.94937852 | 0.346329433 | 0.529374487 |
| 229355_at   | -0.02777009 | -0.47587556 | 0.635933395 | 0.778085671 |
| 229356_x_at | 0.073031702 | 2.451924559 | 0.017210987 | 0.054502474 |
| 229357_at   | -0.03271099 | -0.95369798 | 0.34415634  | 0.526946285 |
| 229358_at   | 0.033886158 | 1.064968212 | 0.29126132  | 0.469641409 |
| 229359_at   | 0.125568836 | 2.241902024 | 0.028769662 | 0.082352766 |
| 229360_at   | -0.23843894 | -5.11552012 | 3.62E-06    | 4.63E-05    |
| 229361_at   | 0.023119323 | 0.765260762 | 0.447189231 | 0.626929328 |
| 229362_at   | -0.01503062 | -0.41688125 | 0.678289345 | 0.807174945 |
| 229363_at   | -0.03858128 | -1.009569   | 0.316854763 | 0.498096133 |
| 229364_at   | 0.137209918 | 3.593890549 | 0.000668738 | 0.003655037 |
| 229365_at   | -0.06794014 | -1.69316241 | 0.09573787  | 0.210525333 |
| 229366_at   | -0.1029722  | -2.41426025 | 0.018911646 | 0.05891122  |
| 229367_s_at | 0.067402545 | 0.949997204 | 0.346017627 | 0.529116531 |
| 229368_s_at | -0.04210332 | -1.23811745 | 0.22061274  | 0.387548625 |
| 229369_at   | 0.13689525  | 4.870195952 | 8.83E-06    | 9.62E-05    |
| 229370_at   | 0.056387145 | 1.614692331 | 0.111752634 | 0.236681297 |
| 229371_at   | 0.11914104  | 1.775335623 | 0.08103847  | 0.185507561 |
| 229372_at   | -0.44641006 | -5.61806923 | 5.62E-07    | 9.93E-06    |
| 229373_at   | -0.57173848 | -6.36128    | 3.31E-08    | 1.07E-06    |
| 229374_at   | -0.26249283 | -4.83191585 | 1.01E-05    | 0.000107973 |
| 229375_at   | 0.083553791 | 2.27485678  | 0.026591807 | 0.077367428 |
| 229376_at   | 0.242496481 | 3.797165882 | 0.000349899 | 0.002115773 |
| 229377_at   | 0.213555529 | 4.451265842 | 3.89E-05    | 0.000334676 |
| 229378_at   | 0.189874623 | 2.672529184 | 0.009735796 | 0.034155913 |
| 229379_at   | 0.019552424 | 0.562321233 | 0.576043235 | 0.733336872 |
| 229380_at   | 0.16857967  | 3.777196844 | 0.000373187 | 0.002233323 |
| 229381_at   | 0.137292588 | 3.105909451 | 0.002922909 | 0.012550983 |
| 229382_at   | -0.12911043 | -3.55538717 | 0.00075445  | 0.004043162 |
| 229383_at   | -0.06731284 | -1.41727758 | 0.161699931 | 0.310651821 |
| 229384_at   | 0.01163439  | 0.311414341 | 0.756591488 | 0.859958972 |
| 229385_s_at | -0.03149718 | -0.75450693 | 0.453568142 | 0.632812019 |
| 229386_at   | 0.109560748 | 1.70720799  | 0.093080343 | 0.206193145 |
| 229387_at   | 0.035730537 | 1.006531103 | 0.318300733 | 0.499631089 |
| 229388_at   | 0.090004497 | 1.719679348 | 0.090771852 | 0.202191768 |
| 229389_at   | 0.090776734 | 2.402774616 | 0.019459455 | 0.060289912 |
| 229390_at   | -0.10235224 | -1.24308041 | 0.21879177  | 0.385531751 |

|             |             |             |             |             |
|-------------|-------------|-------------|-------------|-------------|
| 229391_s_at | -0.10263694 | -1.60530204 | 0.113806624 | 0.239905931 |
| 229392_s_at | -0.00316133 | -0.10806973 | 0.914309771 | 0.954267438 |
| 229393_at   | 0.048965769 | 1.452953803 | 0.151573841 | 0.296448213 |
| 229394_s_at | 0.193177163 | 2.763110693 | 0.007639128 | 0.027978404 |
| 229395_at   | -0.03758184 | -1.20834497 | 0.231771004 | 0.400151036 |
| 229396_at   | 0.020221909 | 0.641869098 | 0.523462618 | 0.692184253 |
| 229397_s_at | 0.037124041 | 0.935441984 | 0.353401782 | 0.536573213 |
| 229398_at   | 0.075960172 | 1.660898359 | 0.102078789 | 0.221117935 |
| 229399_at   | -0.01003066 | -0.32767981 | 0.744322281 | 0.851928481 |
| 229400_at   | 0.185785704 | 6.14793281  | 7.52E-08    | 2.02E-06    |
| 229401_at   | -0.0099255  | -0.30534664 | 0.761184782 | 0.862500581 |
| 229402_at   | 0.042074993 | 1.100270812 | 0.27571608  | 0.452178013 |
| 229403_at   | -0.0504514  | -1.51050327 | 0.136291989 | 0.274537383 |
| 229404_at   | -0.01313035 | -0.37834193 | 0.706544562 | 0.827009836 |
| 229405_at   | 0.063535571 | 1.928267999 | 0.058674139 | 0.144381932 |
| 229406_at   | -0.9014788  | -7.03914829 | 2.41E-09    | 1.66E-07    |
| 229407_at   | 0.056545314 | 1.423118945 | 0.160006981 | 0.308353757 |
| 229408_at   | 0.095425777 | 2.705719979 | 0.008913011 | 0.031773173 |
| 229409_s_at | 0.140160854 | 3.318254376 | 0.001561114 | 0.007407294 |
| 229410_at   | -0.18193724 | -4.7481121  | 1.37E-05    | 0.000138394 |
| 229411_at   | -0.4135919  | -5.28499355 | 1.94E-06    | 2.77E-05    |
| 229412_at   | 0.094423584 | 2.662371473 | 0.010001142 | 0.034911431 |
| 229413_s_at | -0.00707119 | -0.08091758 | 0.935783385 | 0.966625781 |
| 229414_at   | -0.18833911 | -2.64384161 | 0.010502272 | 0.036275409 |
| 229415_at   | -0.35787014 | -5.83597075 | 2.47E-07    | 5.10E-06    |
| 229416_at   | 0.002221032 | 0.05697769  | 0.954756916 | 0.976743032 |
| 229417_at   | -0.1850066  | -3.7469214  | 0.000411349 | 0.00242982  |
| 229418_at   | -0.04404569 | -1.50565467 | 0.137530556 | 0.27640939  |
| 229419_at   | -0.35497522 | -3.58323707 | 0.000691476 | 0.003758173 |
| 229420_at   | -0.02089233 | -0.41876471 | 0.676919907 | 0.806163682 |
| 229421_s_at | -0.02041418 | -0.73232662 | 0.466889935 | 0.644258521 |
| 229422_at   | 0.089744148 | 1.352008057 | 0.18157099  | 0.338129534 |
| 229423_at   | 0.145033109 | 3.617221265 | 0.000621407 | 0.003438394 |
| 229424_s_at | 0.041802463 | 1.068318446 | 0.289760606 | 0.467981389 |
| 229425_at   | 0.075885758 | 2.546085429 | 0.013545498 | 0.044683746 |
| 229426_at   | -0.03390047 | -0.82508814 | 0.412669666 | 0.594994119 |
| 229427_at   | -0.04219654 | -1.08676442 | 0.281593574 | 0.458820226 |
| 229428_at   | -0.03853817 | -0.47708058 | 0.635080221 | 0.777446183 |
| 229429_x_at | 0.225412641 | 4.097623447 | 0.000130106 | 0.000921503 |
| 229430_at   | 0.010560154 | 0.152396728 | 0.879397846 | 0.93528059  |
| 229431_at   | -0.03897425 | -0.47448766 | 0.636916666 | 0.778734431 |
| 229432_at   | 0.053839276 | 1.478661413 | 0.144589397 | 0.286626274 |
| 229433_at   | -0.05304052 | -1.13324619 | 0.261728768 | 0.436152806 |
| 229434_at   | 0.368397014 | 5.774547396 | 3.11E-07    | 6.16E-06    |
| 229435_at   | 0.900832579 | 6.006374169 | 1.29E-07    | 3.09E-06    |
| 229436_x_at | -0.1419948  | -3.16261881 | 0.002477853 | 0.010912516 |
| 229437_at   | -0.00636641 | -0.19402732 | 0.846825914 | 0.915775411 |
| 229438_at   | -0.02639184 | -0.88051928 | 0.382177136 | 0.564946384 |
| 229439_s_at | -0.08520812 | -2.47458209 | 0.01625546  | 0.051977464 |
| 229440_at   | -0.02420645 | -0.73716253 | 0.463966581 | 0.641749109 |
| 229441_at   | -0.12042313 | -2.85467516 | 0.0059489   | 0.022741275 |
| 229442_at   | 0.362868874 | 5.09699645  | 3.88E-06    | 4.89E-05    |
| 229443_at   | 0.008088637 | 0.273494245 | 0.785435512 | 0.877610978 |
| 229444_at   | 0.180479237 | 3.845779779 | 0.000298889 | 0.00185682  |
| 229445_at   | 0.044131214 | 1.303820211 | 0.197396541 | 0.358368467 |
| 229446_at   | 0.006551132 | 0.215082775 | 0.83045001  | 0.906070794 |
| 229447_x_at | 0.236140742 | 4.419250383 | 4.34E-05    | 0.000366111 |
| 229448_at   | 0.379688224 | 5.736742433 | 3.59E-07    | 6.92E-06    |
| 229449_at   | 0.091735745 | 1.889213332 | 0.063817238 | 0.154393981 |
| 229450_at   | 0.042431016 | 0.303251772 | 0.762772624 | 0.863580345 |
| 229451_at   | 0.147645587 | 3.623800775 | 0.000608648 | 0.003376994 |
| 229452_at   | -0.04345573 | -1.09984001 | 0.275902215 | 0.452367077 |
| 229453_at   | -0.07669265 | -2.82574334 | 0.006441435 | 0.024295774 |
| 229454_at   | -0.26760705 | -6.38525432 | 3.02E-08    | 1.00E-06    |
| 229455_at   | -0.01065936 | -0.28347005 | 0.777816196 | 0.872566115 |
| 229456_s_at | -0.05803799 | -0.92857379 | 0.356921392 | 0.539961102 |
| 229457_at   | 0.028947261 | 1.195204457 | 0.23682456  | 0.406177114 |
| 229458_s_at | -0.04947823 | -1.17171868 | 0.246054759 | 0.417553131 |
| 229459_at   | 0.099443757 | 1.47382961  | 0.145882478 | 0.288383744 |
| 229460_at   | -0.58844736 | -5.52222271 | 8.04E-07    | 1.34E-05    |
| 229461_x_at | -0.65103434 | -4.92527063 | 7.24E-06    | 8.20E-05    |
| 229462_at   | -0.01325006 | -0.47439061 | 0.636985442 | 0.778772679 |
| 229463_at   | -0.32443339 | -3.51280688 | 0.000861394 | 0.004498938 |
| 229464_at   | -0.11762003 | -3.28660581 | 0.001716614 | 0.008021637 |
| 229465_s_at | 0.010298184 | 0.191548828 | 0.848758183 | 0.916935403 |



|             |             |             |             |             |
|-------------|-------------|-------------|-------------|-------------|
| 229466_at   | -0.03687301 | -1.01136301 | 0.316002934 | 0.49723366  |
| 229467_at   | 0.235220154 | 4.788563899 | 1.18E-05    | 0.000122556 |
| 229468_at   | 0.318830679 | 7.69882647  | 1.85E-10    | 3.11E-08    |
| 229469_at   | -0.00106588 | -0.02888778 | 0.977052309 | 0.988509571 |
| 229470_at   | 0.218728016 | 4.771477242 | 1.26E-05    | 0.000128959 |
| 229471_s_at | 0.041688815 | 0.821546474 | 0.414666983 | 0.596884024 |
| 229472_at   | -0.00518761 | -0.12758871 | 0.898911545 | 0.945982552 |
| 229473_at   | 0.168760091 | 4.427393722 | 4.22E-05    | 0.000357944 |
| 229474_at   | 0.160352885 | 3.626296358 | 0.000603874 | 0.003354522 |
| 229475_at   | -0.04760445 | -1.00433376 | 0.319349377 | 0.500890094 |
| 229476_s_at | -0.02875796 | -0.72998705 | 0.468307985 | 0.64527888  |
| 229477_at   | 0.009354546 | 0.285621321 | 0.776175937 | 0.87186405  |
| 229478_x_at | 0.010613936 | 0.408777778 | 0.684193685 | 0.811148368 |
| 229479_at   | 0.035523752 | 0.985627292 | 0.328370534 | 0.510915469 |
| 229480_at   | 0.395519105 | 4.878351953 | 8.57E-06    | 9.39E-05    |
| 229481_at   | 0.06713426  | 2.260520917 | 0.0275206   | 0.079423392 |
| 229482_at   | 0.044686367 | 1.301187914 | 0.198289973 | 0.359453861 |
| 229483_at   | 0.138252098 | 1.896745676 | 0.06279658  | 0.152430913 |
| 229484_at   | 0.073967929 | 1.676830201 | 0.098906058 | 0.215735908 |
| 229485_x_at | -0.05390827 | -2.01733195 | 0.04825152  | 0.12399499  |
| 229486_s_at | -0.03588978 | -0.99507317 | 0.323794287 | 0.50582512  |
| 229487_at   | -0.08293628 | -1.89041304 | 0.06365374  | 0.154073491 |
| 229488_at   | 0.185020683 | 5.470826496 | 9.75E-07    | 1.56E-05    |
| 229489_at   | 0.022285411 | 0.501439684 | 0.617941443 | 0.765354145 |
| 229490_s_at | -0.01716593 | -0.55759823 | 0.579243891 | 0.735902211 |
| 229491_at   | -0.0113685  | -0.29139483 | 0.77177895  | 0.869271324 |
| 229492_at   | 0.065724776 | 2.299261447 | 0.025074427 | 0.07390044  |
| 229493_at   | -0.06424879 | -1.53101136 | 0.131150646 | 0.266996979 |
| 229494_s_at | -0.00894388 | -0.35353829 | 0.724954424 | 0.839282538 |
| 229495_at   | -0.05955008 | -1.91722753 | 0.060090984 | 0.147228017 |
| 229496_at   | -0.05363517 | -1.55204686 | 0.126038567 | 0.259302948 |
| 229497_at   | 0.292222882 | 4.19781041  | 9.28E-05    | 0.000691501 |
| 229498_at   | 0.116060683 | 2.330609083 | 0.023238433 | 0.069553446 |
| 229499_at   | -0.03244936 | -0.97312011 | 0.334495783 | 0.517313943 |
| 229500_at   | -0.15953586 | -2.82518395 | 0.006451319 | 0.024326893 |
| 229501_s_at | 0.080261141 | 1.851664153 | 0.069117235 | 0.164159401 |
| 229502_at   | -0.00912674 | -0.2624016  | 0.793932649 | 0.882757506 |
| 229503_at   | 0.1841368   | 0.379351559 | 0.705798819 | 0.826635459 |
| 229504_at   | 0.42842453  | 4.865087638 | 8.99E-06    | 9.78E-05    |
| 229505_at   | 0.025341876 | 0.665241704 | 0.508507308 | 0.679677592 |
| 229506_at   | 0.076295887 | 2.092174201 | 0.040767063 | 0.108553479 |
| 229507_at   | 0.040162455 | 1.705115867 | 0.093472297 | 0.206825621 |
| 229508_at   | 0.017190028 | 0.384606716 | 0.701921896 | 0.824014243 |
| 229509_at   | 0.038703586 | 1.311203597 | 0.194906666 | 0.35509228  |
| 229510_at   | 0.059880571 | 1.192336808 | 0.237937938 | 0.407384047 |
| 229511_at   | 0.019050742 | 0.472577248 | 0.638271182 | 0.779899816 |
| 229512_at   | 0.174916518 | 3.890844245 | 0.000258041 | 0.001636961 |
| 229513_at   | -0.181083   | -2.28815027 | 0.025755475 | 0.075484535 |
| 229514_at   | 0.053085401 | 1.244983576 | 0.218096424 | 0.384594593 |
| 229515_at   | 0.193746336 | 3.326864469 | 0.001521169 | 0.007246228 |
| 229516_at   | -0.01109075 | -0.32795397 | 0.744116035 | 0.851798142 |
| 229517_at   | -0.32971916 | -5.16497898 | 3.02E-06    | 3.98E-05    |
| 229518_at   | 0.048741073 | 1.380416235 | 0.172704704 | 0.326171342 |
| 229519_at   | 0.025802538 | 0.576807277 | 0.566280192 | 0.726578846 |
| 229520_s_at | 0.213096496 | 3.43576858  | 0.00109248  | 0.005479194 |
| 229521_at   | 0.023941333 | 0.690180636 | 0.492806684 | 0.666501658 |
| 229522_at   | -0.02314228 | -0.62683368 | 0.533204231 | 0.700058682 |
| 229523_at   | 0.094408542 | 2.440915405 | 0.017693271 | 0.055765101 |
| 229524_at   | -0.02461323 | -0.59023679 | 0.557302564 | 0.71935554  |
| 229525_at   | -0.11933104 | -3.46601362 | 0.000995497 | 0.005074798 |
| 229526_at   | -0.10497528 | -2.81333617 | 0.006663967 | 0.024987498 |
| 229527_s_at | 0.021112031 | 0.456044373 | 0.650044675 | 0.788037861 |
| 229528_at   | 0.037651906 | 0.888249042 | 0.37804041  | 0.560526242 |
| 229529_at   | -0.04461379 | -1.50543871 | 0.13758593  | 0.276495814 |
| 229530_at   | -0.94293535 | -6.57511696 | 1.45E-08    | 5.91E-07    |
| 229531_at   | 0.32953521  | 4.912212773 | 7.59E-06    | 8.49E-05    |
| 229532_at   | 0.023738332 | 0.601921754 | 0.549549435 | 0.712661315 |
| 229533_x_at | 0.163929832 | 2.95522843  | 0.004495232 | 0.018082889 |
| 229534_at   | -0.11803095 | -2.53443861 | 0.013956958 | 0.045767434 |
| 229535_at   | 0.087855416 | 3.151532227 | 0.002559523 | 0.011219124 |
| 229536_at   | 0.064594122 | 1.721665679 | 0.090408573 | 0.201613689 |
| 229537_at   | -0.21861163 | -2.85199109 | 0.005993085 | 0.022880825 |
| 229538_s_at | -0.03049121 | -0.93829413 | 0.351946838 | 0.535225537 |
| 229539_at   | -0.05792765 | -1.79905137 | 0.077163357 | 0.178507414 |
| 229540_at   | 0.121729796 | 2.616342619 | 0.011288277 | 0.038475877 |

|             |             |             |             |             |
|-------------|-------------|-------------|-------------|-------------|
| 229541_at   | 0.054945457 | 0.972174288 | 0.334962041 | 0.517710733 |
| 229542_at   | 0.084790371 | 1.382716944 | 0.172001438 | 0.325172938 |
| 229543_at   | -0.03578692 | -1.29569672 | 0.200163506 | 0.362013169 |
| 229544_at   | 0.077722782 | 1.61098227  | 0.112560544 | 0.237975109 |
| 229545_at   | -0.05432877 | -1.65713771 | 0.102839697 | 0.222312464 |
| 229546_at   | -0.5494065  | -8.07480154 | 4.30E-11    | 1.34E-08    |
| 229547_s_at | -0.0557441  | -1.24597866 | 0.217733504 | 0.384075851 |
| 229548_at   | 0.052162192 | 1.656253038 | 0.103019368 | 0.222637407 |
| 229549_at   | -0.26128894 | -4.09740263 | 0.000130202 | 0.000922039 |
| 229550_at   | -0.32472805 | -6.7738595  | 6.73E-09    | 3.39E-07    |
| 229551_x_at | 0.032857479 | 0.672162538 | 0.504123401 | 0.676148619 |
| 229552_at   | 0.01542704  | 0.48366143  | 0.630429676 | 0.774234373 |
| 229553_at   | -0.39713546 | -2.79232658 | 0.007057015 | 0.026223673 |
| 229554_at   | -0.04730834 | -1.94306899 | 0.056819423 | 0.140982325 |
| 229555_at   | -0.0388668  | -1.17096091 | 0.246356819 | 0.417907043 |
| 229556_at   | -0.05294663 | -1.45363833 | 0.151384508 | 0.296218962 |
| 229557_at   | -0.73687746 | -5.81394959 | 2.68E-07    | 5.45E-06    |
| 229558_at   | 0.082062844 | 2.335469111 | 0.022964766 | 0.06888659  |
| 229559_at   | -8.51E-05   | -0.00245213 | 0.998051816 | 0.999059878 |
| 229560_at   | 0.183200185 | 3.967419059 | 0.000200639 | 0.00132042  |
| 229561_at   | 0.014634639 | 0.328984496 | 0.743340969 | 0.851197689 |
| 229562_at   | 0.051473615 | 1.836439807 | 0.071369427 | 0.168097099 |
| 229563_s_at | 0.040029126 | 0.583811303 | 0.561589126 | 0.722874119 |
| 229564_at   | -0.14450291 | -2.33994338 | 0.022715363 | 0.068257581 |
| 229565_x_at | -0.04018374 | -1.12650155 | 0.264547979 | 0.439452883 |
| 229566_at   | 0.053691927 | 1.5685329   | 0.122144424 | 0.252948362 |
| 229567_at   | 0.039911498 | 1.382013188 | 0.172216324 | 0.325455693 |
| 229568_at   | -0.38840471 | -4.54880244 | 2.77E-05    | 0.000250584 |
| 229569_at   | 0.015493725 | 0.433382532 | 0.666328975 | 0.79906554  |
| 229570_at   | -0.03387944 | -0.92414886 | 0.359200905 | 0.542336468 |
| 229571_at   | 0.234104447 | 4.812001599 | 1.09E-05    | 0.000114471 |
| 229572_at   | -0.03360924 | -0.94066764 | 0.350739022 | 0.533915609 |
| 229573_at   | -0.15172382 | -3.94692637 | 0.000214665 | 0.001399327 |
| 229574_at   | 0.438391919 | 5.062231455 | 4.40E-06    | 5.43E-05    |
| 229575_at   | 0.052638161 | 1.493041265 | 0.140794348 | 0.281123218 |
| 229576_s_at | 0.078707067 | 1.900472955 | 0.062296663 | 0.151519045 |
| 229577_at   | -0.10039786 | -2.88346256 | 0.005493577 | 0.021288384 |
| 229578_at   | 0.068414018 | 1.673656576 | 0.099531545 | 0.216861536 |
| 229579_s_at | -0.03799515 | -0.85792362 | 0.394432055 | 0.577038771 |
| 229580_at   | 0.017980127 | 0.289577284 | 0.773162351 | 0.870153227 |
| 229581_at   | 0.014938508 | 0.338022818 | 0.736554693 | 0.846963987 |
| 229582_at   | -0.18888865 | -3.61791722 | 0.000620045 | 0.003432238 |
| 229583_at   | -0.06010443 | -1.4290993  | 0.158288023 | 0.305911711 |
| 229584_at   | -0.3360926  | -6.72223845 | 8.22E-09    | 3.88E-07    |
| 229585_at   | 0.091707725 | 2.626226793 | 0.010999789 | 0.037646138 |
| 229586_at   | 0.182212321 | 2.827148391 | 0.006416672 | 0.024218722 |
| 229587_at   | 0.017809344 | 0.58972834  | 0.557641166 | 0.719626328 |
| 229588_at   | 0.18103256  | 3.230625025 | 0.002028021 | 0.009215654 |
| 229589_x_at | -0.03888717 | -1.16755006 | 0.247719755 | 0.419725189 |
| 229590_at   | 0.040054216 | 0.95531513  | 0.343345063 | 0.526299135 |
| 229591_at   | -0.01284941 | -0.39756126 | 0.692398959 | 0.817431696 |
| 229592_at   | -0.02930438 | -0.90100564 | 0.371275615 | 0.55448788  |
| 229593_at   | 0.088529597 | 3.603465388 | 0.000648912 | 0.003565425 |
| 229594_at   | 0.008807228 | 0.264806507 | 0.792088281 | 0.881540191 |
| 229595_at   | -0.29027068 | -6.29713035 | 4.24E-08    | 1.29E-06    |
| 229596_at   | -0.14055705 | -3.93678257 | 0.000221952 | 0.001441783 |
| 229597_s_at | 0.031136785 | 0.823916839 | 0.413329572 | 0.595580515 |
| 229598_at   | -0.03101238 | -1.235571   | 0.22155138  | 0.388530944 |
| 229599_at   | 0.053467227 | 1.631177982 | 0.108219276 | 0.231159342 |
| 229600_s_at | -0.01940014 | -0.5533654  | 0.582119626 | 0.738024179 |
| 229601_at   | -0.03963833 | -0.8449563  | 0.401573893 | 0.583893693 |
| 229602_at   | -0.06017127 | -1.52128945 | 0.133568357 | 0.270514207 |
| 229603_at   | -0.24386032 | -4.11763516 | 0.000121656 | 0.000870623 |
| 229604_at   | 0.079551392 | 2.031747499 | 0.046724064 | 0.12100479  |
| 229605_at   | 0.0451285   | 0.947353114 | 0.347351481 | 0.530330431 |
| 229606_at   | -1.12204391 | -7.61853386 | 2.53E-10    | 3.79E-08    |
| 229607_at   | 0.014683412 | 0.310075275 | 0.757604418 | 0.86062876  |
| 229608_at   | -0.06180714 | -2.02967979 | 0.04694056  | 0.121418423 |
| 229609_at   | -0.02966066 | -0.77785506 | 0.439785553 | 0.620282637 |
| 229610_at   | 0.063271765 | 1.876987835 | 0.065503739 | 0.157570005 |
| 229611_at   | -0.03650576 | -1.05983605 | 0.293570619 | 0.472121559 |
| 229612_at   | -0.11475495 | -2.12869467 | 0.037496404 | 0.101612254 |
| 229613_at   | 0.185785342 | 4.292573883 | 6.72E-05    | 0.000527018 |
| 229614_at   | 0.018141077 | 0.350193126 | 0.727450103 | 0.840886636 |
| 229615_at   | 0.002341632 | 0.07895575  | 0.937336979 | 0.96740328  |

|             |              |             |             |             |
|-------------|--------------|-------------|-------------|-------------|
| 229616_s_at | -0.01257289  | -0.14671098 | 0.883864008 | 0.937969564 |
| 229617_x_at | -0.08352444  | -2.42316209 | 0.018496629 | 0.05781339  |
| 229618_at   | 0.13485665   | 2.326779465 | 0.02345612  | 0.070111083 |
| 229619_at   | 0.044533476  | 1.145462643 | 0.256676746 | 0.430268825 |
| 229620_at   | 0.187891431  | 3.72392675  | 0.000442803 | 0.002582172 |
| 229621_x_at | 0.029176681  | 0.797177487 | 0.428568068 | 0.60979136  |
| 229622_at   | -0.04768932  | -1.16670727 | 0.248057358 | 0.420217551 |
| 229623_at   | 0.356434089  | 3.851311514 | 0.000293559 | 0.001828026 |
| 229624_at   | 0.049781232  | 1.596445766 | 0.115771646 | 0.243049601 |
| 229625_at   | 0.028426039  | 0.746905778 | 0.458108552 | 0.636721736 |
| 229626_at   | -0.12086653  | -3.1846958  | 0.002322453 | 0.010333449 |
| 229627_at   | 0.084353583  | 1.481394586 | 0.143861949 | 0.285555564 |
| 229628_s_at | 0.176503728  | 2.572847142 | 0.012641399 | 0.042237547 |
| 229629_at   | 0.009644422  | 0.272499202 | 0.786196677 | 0.878150451 |
| 229630_s_at | 0.244142575  | 3.009851754 | 0.003851348 | 0.015885967 |
| 229631_at   | 0.063375226  | 1.994303918 | 0.050780785 | 0.129057596 |
| 229632_s_at | 0.124126666  | 2.392823464 | 0.019945528 | 0.061446581 |
| 229633_at   | 0.161233364  | 2.99743219  | 0.00398971  | 0.016362761 |
| 229634_at   | -0.05307779  | -1.31359337 | 0.194105854 | 0.35412001  |
| 229635_at   | 0.742715939  | 4.800013388 | 1.14E-05    | 0.000118599 |
| 229636_at   | 0.01786964   | 0.466921852 | 0.642288216 | 0.78260435  |
| 229637_at   | -0.54103302  | -8.9118111  | 1.71E-12    | 2.83E-09    |
| 229638_at   | 0.223233489  | 3.735027911 | 0.000427341 | 0.002505408 |
| 229639_s_at | 0.028450006  | 0.692684209 | 0.491245374 | 0.66542223  |
| 229640_x_at | -0.15337036  | -2.50115438 | 0.015195938 | 0.049162942 |
| 229641_at   | -0.13346003  | -3.90610035 | 0.000245472 | 0.001569474 |
| 229642_at   | -0.31569949  | -4.67448229 | 1.78E-05    | 0.000172531 |
| 229643_at   | -0.02877555  | -1.14061602 | 0.258672659 | 0.432657128 |
| 229644_at   | -0.00537049  | -0.25550545 | 0.799227946 | 0.886267099 |
| 229645_at   | 0.261940903  | 3.344781856 | 0.001441121 | 0.006932891 |
| 229646_at   | 0.0444446133 | 1.230182075 | 0.223547444 | 0.390676979 |
| 229647_at   | -0.12849886  | -2.27544998 | 0.026553981 | 0.077292595 |
| 229648_at   | -0.53440815  | -6.73528426 | 7.82E-09    | 3.74E-07    |
| 229649_at   | -0.6644735   | -5.37207724 | 1.41E-06    | 2.11E-05    |
| 229650_s_at | -0.07323936  | -1.58917929 | 0.117404277 | 0.245647564 |
| 229651_at   | -0.69163025  | -6.66509847 | 1.03E-08    | 4.57E-07    |
| 229652_s_at | -0.08044507  | -2.14957073 | 0.035731626 | 0.097814396 |
| 229653_at   | -0.33528576  | -5.17155747 | 2.95E-06    | 3.89E-05    |
| 229654_at   | -0.19976184  | -3.78656941 | 0.000362077 | 0.002176456 |
| 229655_at   | 0.05009632   | 1.11725934  | 0.268445927 | 0.443887278 |
| 229656_s_at | -0.12556778  | -2.27915491 | 0.026318804 | 0.076786525 |
| 229657_at   | -0.37299799  | -4.06927888 | 0.000143051 | 0.000995367 |
| 229658_at   | -0.00609077  | -0.16694094 | 0.867991584 | 0.928444781 |
| 229659_s_at | -0.0159407   | -0.46322661 | 0.644918773 | 0.78446219  |
| 229660_at   | 0.12636132   | 2.714134154 | 0.008714802 | 0.031188495 |
| 229661_at   | 0.014636289  | 0.384359148 | 0.702104358 | 0.824058934 |
| 229662_at   | 0.037007584  | 1.08209641  | 0.283645059 | 0.461088816 |
| 229663_at   | -0.0581088   | -1.63990641 | 0.106385557 | 0.228026632 |
| 229664_at   | 0.037253407  | 0.700813097 | 0.486194776 | 0.660878519 |
| 229665_at   | 0.106455595  | 1.982656251 | 0.05210292  | 0.131714672 |
| 229666_s_at | 0.037333151  | 0.611929835 | 0.542952582 | 0.707576742 |
| 229667_s_at | -0.07124226  | -2.0224609  | 0.0477032   | 0.122949207 |
| 229668_at   | -0.02618668  | -0.73176186 | 0.467232024 | 0.644451998 |
| 229669_at   | -0.03328937  | -1.20316028 | 0.233755464 | 0.402535321 |
| 229670_at   | -0.08533234  | -1.58194415 | 0.119048234 | 0.248030147 |
| 229671_s_at | -0.06306116  | -1.74880035 | 0.085565003 | 0.193398631 |
| 229672_at   | 0.06941836   | 1.731021811 | 0.088713534 | 0.198746066 |
| 229673_at   | -0.07925279  | -2.43345821 | 0.018026818 | 0.056660424 |
| 229674_at   | -0.15463688  | -4.06889161 | 0.000143236 | 0.000996035 |
| 229675_at   | 0.006680089  | 0.144257241 | 0.885792602 | 0.938831297 |
| 229676_at   | -0.08237452  | -1.44014572 | 0.155150665 | 0.30147798  |
| 229677_at   | -0.0169514   | -0.6149615  | 0.540962267 | 0.706383615 |
| 229678_at   | 0.052914664  | 1.661708002 | 0.101915573 | 0.220860728 |
| 229679_at   | 0.081468045  | 1.342520009 | 0.184608187 | 0.341990014 |
| 229680_at   | -0.03184531  | -0.91192468 | 0.365546866 | 0.548866807 |
| 229681_at   | -0.01434096  | -0.42946942 | 0.669157543 | 0.800690804 |
| 229682_at   | 0.080028519  | 2.012110625 | 0.048815283 | 0.125137813 |
| 229683_s_at | -0.06224986  | -1.58276186 | 0.118861511 | 0.247756171 |
| 229684_s_at | -0.03211841  | -0.91559203 | 0.36363553  | 0.546768466 |
| 229685_at   | -0.01736767  | -0.27752844 | 0.782351686 | 0.875610075 |
| 229686_at   | 0.098233622  | 2.612017583 | 0.011416666 | 0.038848304 |
| 229687_s_at | -0.02997935  | -0.73776786 | 0.463601391 | 0.641483432 |
| 229688_at   | -0.10905894  | -2.46531873 | 0.016640189 | 0.052976444 |
| 229689_s_at | 0.105534858  | 2.815858578 | 0.006618159 | 0.024851183 |
| 229690_at   | -0.02163423  | -0.6019412  | 0.54953658  | 0.712661315 |

|             |             |             |             |             |
|-------------|-------------|-------------|-------------|-------------|
| 229691_at   | 0.130327889 | 3.100616887 | 0.002968058 | 0.012722853 |
| 229692_at   | 0.004995893 | 0.07880694  | 0.937454832 | 0.967424424 |
| 229693_at   | 0.13160756  | 3.190170088 | 0.002285361 | 0.010193349 |
| 229694_at   | 0.481784095 | 5.750963198 | 3.40E-07    | 6.64E-06    |
| 229695_at   | 0.266038113 | 2.427880813 | 0.018279966 | 0.057290826 |
| 229696_at   | -0.14436393 | -3.97286326 | 0.000197064 | 0.001301108 |
| 229697_at   | 0.050857627 | 1.326882819 | 0.189697702 | 0.348400168 |
| 229698_at   | -0.00246741 | -0.09164265 | 0.927294707 | 0.961970295 |
| 229699_at   | 0.051144022 | 1.138472328 | 0.259558975 | 0.4336575   |
| 229700_at   | 0.362944449 | 4.236718395 | 8.13E-05    | 0.000618911 |
| 229701_at   | -0.02070076 | -0.62783773 | 0.532550779 | 0.69952855  |
| 229702_at   | -0.01180943 | -0.39497753 | 0.694294349 | 0.818767426 |
| 229703_at   | -0.09611025 | -2.62288713 | 0.011096503 | 0.037937952 |
| 229704_at   | -0.26596437 | -2.18057603 | 0.033244728 | 0.092448334 |
| 229705_at   | -0.25860903 | -4.03211745 | 0.000161919 | 0.001102953 |
| 229706_at   | -0.04256167 | -0.8128542  | 0.419593767 | 0.601774105 |
| 229707_at   | 0.029744438 | 0.747464278 | 0.457774054 | 0.636526095 |
| 229708_at   | 0.010588505 | 0.285636717 | 0.776164202 | 0.87186405  |
| 229709_at   | -0.03693364 | -1.02120663 | 0.311356472 | 0.492275213 |
| 229710_at   | -0.10050134 | -1.81447385 | 0.074727404 | 0.174161303 |
| 229711_s_at | 0.240003821 | 3.284011045 | 0.001729992 | 0.008076547 |
| 229712_at   | -0.08804308 | -1.99644843 | 0.050540528 | 0.128542981 |
| 229713_at   | -0.08159138 | -0.53089094 | 0.597501932 | 0.749826085 |
| 229714_at   | -0.55939843 | -6.55653689 | 1.56E-08    | 6.20E-07    |
| 229715_at   | -0.41552302 | -7.4873325  | 4.21E-10    | 5.21E-08    |
| 229716_at   | 0.104850723 | 2.276949006 | 0.026458604 | 0.077105369 |
| 229717_at   | 0.018336361 | 0.690425463 | 0.492653881 | 0.666440737 |
| 229718_at   | -0.00739704 | -0.17518293 | 0.861540152 | 0.924597841 |
| 229719_s_at | -0.0446125  | -1.03074052 | 0.306900482 | 0.487091031 |
| 229720_at   | -0.06994871 | -2.10186522 | 0.03987584  | 0.106624987 |
| 229721_x_at | 0.014439087 | 0.497450637 | 0.620733864 | 0.767175627 |
| 229722_at   | 0.086177715 | 2.157297847 | 0.035097074 | 0.096473242 |
| 229723_at   | -0.09596391 | -1.7685275  | 0.082180392 | 0.187349831 |
| 229724_at   | -0.89617734 | -6.08186045 | 9.68E-08    | 2.46E-06    |
| 229725_at   | -0.50791041 | -5.37855625 | 1.37E-06    | 2.07E-05    |
| 229726_at   | 0.017721619 | 0.571516077 | 0.569836808 | 0.728569137 |
| 229727_x_at | 0.054559268 | 1.257998772 | 0.213384767 | 0.378706695 |
| 229728_at   | -0.07422064 | -2.68558066 | 0.009404305 | 0.033214573 |
| 229729_at   | -0.00927976 | -0.22603835 | 0.821958598 | 0.901016794 |
| 229730_at   | -0.03072276 | -1.11953996 | 0.267480324 | 0.442749282 |
| 229731_at   | 0.080244562 | 2.273438809 | 0.026682421 | 0.07756542  |
| 229732_at   | 0.005171101 | 0.162831956 | 0.871211296 | 0.930480237 |
| 229733_s_at | -0.60494078 | -5.15570502 | 3.13E-06    | 4.10E-05    |
| 229734_at   | -0.25510281 | -5.43178434 | 1.13E-06    | 1.76E-05    |
| 229735_s_at | -0.09222698 | -2.1885224  | 0.032632342 | 0.091053544 |
| 229736_at   | -0.11479332 | -3.43204878 | 0.001105008 | 0.005533337 |
| 229737_at   | -0.02178922 | -0.65029304 | 0.518045872 | 0.687609697 |
| 229738_at   | 0.066517317 | 1.037861525 | 0.303600634 | 0.483389164 |
| 229739_s_at | -0.17395897 | -3.29705029 | 0.00166375  | 0.007810535 |
| 229740_at   | 0.17842834  | 3.632011213 | 0.000593076 | 0.003306573 |
| 229741_at   | 0.247713493 | 5.535462479 | 7.65E-07    | 1.29E-05    |
| 229742_at   | -0.71264086 | -6.77612326 | 6.68E-09    | 3.37E-07    |
| 229743_at   | 0.191096507 | 6.170790187 | 6.89E-08    | 1.89E-06    |
| 229744_at   | 0.163682869 | 2.966485997 | 0.00435486  | 0.017604615 |
| 229745_x_at | -0.05599016 | -1.09644427 | 0.277372469 | 0.453994887 |
| 229746_x_at | -0.10716479 | -2.31802156 | 0.023960782 | 0.071290544 |
| 229747_x_at | -0.00116897 | -0.01988273 | 0.984204503 | 0.992308698 |
| 229748_x_at | 0.270282274 | 2.592254269 | 0.01202042  | 0.040541589 |
| 229749_at   | 0.021078246 | 0.431442429 | 0.667730759 | 0.799824856 |
| 229750_at   | 0.093661372 | 2.234071724 | 0.029309748 | 0.083566906 |
| 229751_s_at | 0.001398064 | 0.045584562 | 0.963796452 | 0.981363824 |
| 229752_at   | 0.059307063 | 2.05552464  | 0.04429583  | 0.11603477  |
| 229753_at   | 0.051995998 | 1.628580278 | 0.108769945 | 0.231969191 |
| 229754_at   | 0.02132885  | 0.565475886 | 0.57391019  | 0.731799579 |
| 229755_x_at | -0.01812248 | -0.86464079 | 0.390763719 | 0.573568449 |
| 229756_at   | 0.087269682 | 2.009471519 | 0.049102388 | 0.125693915 |
| 229757_at   | -0.1526558  | -2.3528537  | 0.0220092   | 0.066574291 |
| 229758_at   | -0.01835013 | -0.44001834 | 0.661543454 | 0.795675226 |
| 229759_s_at | 0.02039619  | 0.769293207 | 0.444810839 | 0.625023141 |
| 229760_at   | -0.05892596 | -1.7835469  | 0.079678807 | 0.18310393  |
| 229761_at   | 0.013884183 | 0.429577477 | 0.669079367 | 0.800690804 |
| 229762_at   | 0.121400947 | 3.250075272 | 0.001914242 | 0.008788916 |
| 229763_at   | 0.017550465 | 0.693863224 | 0.490511047 | 0.664697078 |
| 229764_at   | 0.024003403 | 0.705543582 | 0.483268965 | 0.658315794 |
| 229765_at   | 0.145519172 | 2.998051827 | 0.003982699 | 0.016340289 |

|             |             |             |             |             |
|-------------|-------------|-------------|-------------|-------------|
| 229766_at   | 0.06146378  | 1.516152816 | 0.134859981 | 0.27243874  |
| 229767_at   | -0.00013542 | -0.00435266 | 0.996541885 | 0.998418444 |
| 229768_at   | -0.0080938  | -0.22187439 | 0.825183529 | 0.902963479 |
| 229769_at   | 0.00745958  | 0.239117079 | 0.811849607 | 0.894495677 |
| 229770_at   | -0.50305361 | -6.42254426 | 2.62E-08    | 8.96E-07    |
| 229771_at   | -0.21327373 | -5.43552894 | 1.11E-06    | 1.74E-05    |
| 229772_at   | 0.024251302 | 0.73458479  | 0.465523548 | 0.643192063 |
| 229773_at   | 0.339501788 | 4.16151243  | 0.000104945 | 0.000767124 |
| 229774_at   | 0.092476016 | 2.070890625 | 0.042785351 | 0.1127654   |
| 229775_s_at | 0.010428494 | 0.226662172 | 0.821475721 | 0.900743221 |
| 229776_at   | 0.100874338 | 2.912042826 | 0.005073631 | 0.019946405 |
| 229777_at   | 0.002738343 | 0.067276972 | 0.946590362 | 0.972417342 |
| 229778_at   | 0.882549913 | 5.669027339 | 4.64E-07    | 8.51E-06    |
| 229779_at   | 0.133545475 | 2.533922123 | 0.013975463 | 0.045821393 |
| 229780_at   | -0.08704774 | -2.37233069 | 0.020980898 | 0.064031569 |
| 229781_at   | 0.01712811  | 0.125704268 | 0.900396551 | 0.946791272 |
| 229782_at   | 0.129117941 | 2.113711522 | 0.038809478 | 0.104322939 |
| 229783_at   | -0.05158816 | -1.27856155 | 0.206095043 | 0.369481314 |
| 229784_at   | 0.024658212 | 0.751868256 | 0.455141347 | 0.634135894 |
| 229785_at   | -0.14787911 | -4.16557084 | 0.000103517 | 0.000759043 |
| 229786_at   | -0.16192491 | -6.03710462 | 1.15E-07    | 2.81E-06    |
| 229787_s_at | -0.23660557 | -3.17800888 | 0.002368528 | 0.010504543 |
| 229788_s_at | -0.00180967 | -0.06131856 | 0.951314286 | 0.975105834 |
| 229789_at   | -0.06206517 | -1.77258478 | 0.081498266 | 0.186336549 |
| 229790_at   | -0.04273337 | -1.48182925 | 0.143746528 | 0.285373126 |
| 229791_at   | -0.04636932 | -1.44898061 | 0.152676448 | 0.297991782 |
| 229792_at   | 0.024823753 | 0.611250374 | 0.543399166 | 0.707962301 |
| 229793_at   | -0.38928494 | -6.30647106 | 4.09E-08    | 1.27E-06    |
| 229794_at   | 0.015328239 | 0.276470499 | 0.783160064 | 0.876054103 |
| 229795_at   | 0.149193193 | 3.464562153 | 0.000999958 | 0.005094054 |
| 229796_at   | 0.101502265 | 2.193735659 | 0.032235986 | 0.090251876 |
| 229797_at   | -0.06199077 | -1.75898059 | 0.083804204 | 0.190188264 |
| 229798_s_at | 0.03799602  | 1.024994432 | 0.309580898 | 0.490144165 |
| 229799_s_at | 0.210626955 | 2.644715207 | 0.01047814  | 0.036214449 |
| 229800_at   | 0.664544832 | 3.980174898 | 0.00019236  | 0.001274559 |
| 229801_at   | 0.020974495 | 0.62256235  | 0.535988731 | 0.702248786 |
| 229802_at   | 0.048965123 | 1.375640918 | 0.174171432 | 0.328137156 |
| 229803_s_at | -0.17595962 | -2.37385712 | 0.020902153 | 0.063830477 |
| 229804_x_at | -0.3236583  | -3.03666561 | 0.003567733 | 0.014872597 |
| 229805_at   | 0.041552393 | 1.28008552  | 0.205562253 | 0.368866467 |
| 229806_at   | -0.02839317 | -0.9822947  | 0.329995295 | 0.512498059 |
| 229807_s_at | 0.006809726 | 0.174879554 | 0.861777453 | 0.924753635 |
| 229808_at   | -0.02617643 | -0.80438826 | 0.424426032 | 0.605923918 |
| 229809_at   | -0.27116498 | -3.1344596  | 0.002690241 | 0.01172197  |
| 229810_at   | 0.103869975 | 1.282066314 | 0.204871292 | 0.368040348 |
| 229811_at   | 0.115370019 | 3.38781206  | 0.001264835 | 0.006201736 |
| 229812_at   | -0.01033306 | -0.2569144  | 0.798145289 | 0.885678691 |
| 229813_x_at | 0.264410733 | 5.682558026 | 4.41E-07    | 8.19E-06    |
| 229814_at   | 0.007922933 | 0.23067995  | 0.818367381 | 0.898687994 |
| 229815_at   | -0.18606245 | -3.05398377 | 0.003395043 | 0.014265818 |
| 229816_at   | 0.449675937 | 3.229159663 | 0.002036846 | 0.009247332 |
| 229817_at   | 0.344950376 | 5.81487893  | 2.67E-07    | 5.43E-06    |
| 229818_at   | -0.63722066 | -5.60161407 | 5.97E-07    | 1.05E-05    |
| 229819_at   | -0.13249109 | -3.48571982 | 0.000936768 | 0.004826054 |
| 229820_at   | 0.091468644 | 2.561997338 | 0.013001126 | 0.043195643 |
| 229821_at   | 0.007177735 | 0.232916202 | 0.816638577 | 0.897575409 |
| 229822_at   | -0.31808824 | -4.75804155 | 1.32E-05    | 0.000134339 |
| 229823_at   | -1.10909151 | -7.19512578 | 1.31E-09    | 1.12E-07    |
| 229824_at   | -0.85193075 | -5.62618793 | 5.45E-07    | 9.70E-06    |
| 229825_at   | -0.03395144 | -1.01236897 | 0.315525964 | 0.496811105 |
| 229826_at   | 0.014410991 | 0.329950103 | 0.742614972 | 0.850845489 |
| 229827_at   | -0.03805256 | -1.21363632 | 0.229758401 | 0.397638334 |
| 229828_at   | 0.213121391 | 3.059013169 | 0.003346373 | 0.014082496 |
| 229829_at   | -0.0244737  | -0.61275163 | 0.542412696 | 0.707205957 |
| 229830_at   | 0.277019915 | 3.626113894 | 0.000604222 | 0.003355353 |
| 229831_at   | 0.151450743 | 0.99205904  | 0.325249893 | 0.507402548 |
| 229832_x_at | -0.00522405 | -0.17733569 | 0.859856618 | 0.923611699 |
| 229833_at   | 0.085968938 | 2.427825214 | 0.018282506 | 0.057290826 |
| 229834_at   | 0.023413785 | 0.493035706 | 0.623830961 | 0.76908922  |
| 229835_s_at | -0.02172304 | -0.47369732 | 0.637476876 | 0.77914474  |
| 229836_s_at | 0.049547984 | 1.438613015 | 0.155583063 | 0.302041359 |
| 229837_s_at | 0.02203228  | 0.658271067 | 0.512943403 | 0.683618614 |
| 229838_at   | -0.15425042 | -4.19618891 | 9.33E-05    | 0.000694826 |
| 229839_at   | 0.032559282 | 0.979303075 | 0.331458363 | 0.514045785 |
| 229840_at   | 0.020041248 | 0.625769801 | 0.533897078 | 0.7005763   |

|             |             |             |             |             |
|-------------|-------------|-------------|-------------|-------------|
| 229841_at   | 0.034532736 | 0.730686258 | 0.46788393  | 0.645004128 |
| 229842_at   | -0.07811896 | -2.16898438 | 0.034156121 | 0.094461966 |
| 229843_at   | 0.070182049 | 1.561287778 | 0.123843741 | 0.255661899 |
| 229844_at   | -0.82798639 | -8.40942911 | 1.18E-11    | 6.05E-09    |
| 229845_at   | 0.023537864 | 0.647978193 | 0.519531392 | 0.688783654 |
| 229846_s_at | -0.32563735 | -4.26428058 | 7.40E-05    | 0.000572886 |
| 229847_at   | -0.01889927 | -0.60217891 | 0.549379425 | 0.71256538  |
| 229848_at   | -0.08160507 | -2.23465285 | 0.02926936  | 0.083481479 |
| 229849_at   | -0.81001475 | -6.25169982 | 5.05E-08    | 1.48E-06    |
| 229850_at   | 0.224999128 | 3.066535003 | 0.003274799 | 0.01383034  |
| 229851_s_at | 0.23112837  | 3.261902123 | 0.001848026 | 0.008543703 |
| 229852_at   | -0.00358139 | -0.10229704 | 0.918870357 | 0.957141452 |
| 229853_at   | -0.0203516  | -0.4863218  | 0.628553891 | 0.772843192 |
| 229854_at   | -0.20133528 | -4.91778012 | 7.44E-06    | 8.38E-05    |
| 229855_at   | -0.1348371  | -3.24169144 | 0.001962528 | 0.008965481 |
| 229856_s_at | -0.04493612 | -1.88123128 | 0.064914136 | 0.156446428 |
| 229857_s_at | -0.01019107 | -0.34766873 | 0.729335411 | 0.84209049  |
| 229858_at   | 0.205383733 | 4.559203012 | 2.67E-05    | 0.000243337 |
| 229859_at   | -0.01295787 | -0.39530713 | 0.694052449 | 0.818626615 |
| 229860_x_at | 0.117319977 | 2.180883525 | 0.033220845 | 0.092395668 |
| 229861_at   | 0.056036534 | 1.449979212 | 0.152398738 | 0.297527713 |
| 229862_x_at | -0.06151727 | -1.88570541 | 0.06429735  | 0.155320099 |
| 229863_s_at | -0.0431099  | -1.04442194 | 0.300582042 | 0.480011885 |
| 229864_at   | -0.07839358 | -3.19865374 | 0.002228977 | 0.009989714 |
| 229865_at   | 0.011739173 | 0.34979656  | 0.72774616  | 0.841120084 |
| 229866_at   | 0.244871257 | 4.050548527 | 0.000152279 | 0.00104654  |
| 229867_at   | -0.20793157 | -3.37048644 | 0.001333208 | 0.006489188 |
| 229868_s_at | 0.054627591 | 1.086805376 | 0.281575621 | 0.458807701 |
| 229869_at   | 0.104214562 | 2.322814336 | 0.023683421 | 0.070679087 |
| 229870_at   | 0.086797709 | 2.749523181 | 0.00792462  | 0.028866211 |
| 229871_at   | 0.16971982  | 3.938751897 | 0.000220519 | 0.001433099 |
| 229872_s_at | 0.271164095 | 3.053299112 | 0.003401719 | 0.014288498 |
| 229873_at   | 0.026396731 | 0.756093997 | 0.452623431 | 0.631952728 |
| 229874_x_at | 0.109174841 | 2.447484326 | 0.017404061 | 0.055028108 |
| 229875_at   | -0.01360303 | -0.35588337 | 0.723206652 | 0.83814794  |
| 229876_at   | 0.239146204 | 3.341921406 | 0.001453627 | 0.006981785 |
| 229877_at   | -0.00507992 | -0.11859654 | 0.906000848 | 0.950184941 |
| 229878_at   | 0.014985389 | 0.455607354 | 0.650357124 | 0.788159894 |
| 229879_at   | 0.145376225 | 3.940263051 | 0.000219425 | 0.001427029 |
| 229880_at   | 0.0379156   | 1.275739353 | 0.207084413 | 0.370808791 |
| 229881_at   | 0.124360233 | 2.40268668  | 0.019463704 | 0.060297972 |
| 229882_at   | 0.011136297 | 0.325267771 | 0.746137594 | 0.853153594 |
| 229883_at   | 0.037419572 | 0.851160404 | 0.398147058 | 0.580516388 |
| 229884_s_at | -0.11509194 | -2.09019196 | 0.040951476 | 0.108960134 |
| 229885_at   | -0.11442161 | -1.8149778  | 0.074648906 | 0.1739965   |
| 229886_at   | -0.17413345 | -5.86016724 | 2.25E-07    | 4.73E-06    |
| 229887_at   | 0.009935828 | 0.354504266 | 0.72423431  | 0.838818249 |
| 229888_at   | -0.02317509 | -0.4981545  | 0.620240735 | 0.766969233 |
| 229889_at   | -0.09114558 | -2.07969653 | 0.041940021 | 0.111028517 |
| 229890_at   | -0.4972251  | -5.21644841 | 2.50E-06    | 3.40E-05    |
| 229891_x_at | -0.2739952  | -3.67228871 | 0.000522041 | 0.002972108 |
| 229892_at   | 0.13750618  | 3.085911431 | 0.003096957 | 0.013197174 |
| 229893_at   | 0.222646498 | 3.773934931 | 0.000377129 | 0.002255407 |
| 229894_s_at | 0.060886452 | 1.675726174 | 0.099123284 | 0.216140603 |
| 229895_s_at | -0.08310155 | -1.94081684 | 0.057098372 | 0.141564431 |
| 229896_at   | -0.04875882 | -1.4502946  | 0.15231111  | 0.297395611 |
| 229897_at   | 0.137588244 | 3.292780456 | 0.001685173 | 0.007898663 |
| 229898_at   | 0.175294838 | 3.388196228 | 0.001263357 | 0.006196439 |
| 229899_s_at | 0.166760461 | 4.211697106 | 8.85E-05    | 0.000664898 |
| 229900_at   | 0.198218577 | 4.598364772 | 2.32E-05    | 0.000216497 |
| 229901_at   | 0.253650491 | 3.147867709 | 0.002587068 | 0.011325423 |
| 229902_at   | -0.62754004 | -6.65003252 | 1.09E-08    | 4.76E-07    |
| 229903_x_at | 0.043812298 | 0.843234525 | 0.402528124 | 0.584805504 |
| 229904_at   | -0.04614429 | -1.11475222 | 0.269510259 | 0.445181138 |
| 229905_at   | -0.48845611 | -3.97375397 | 0.000196485 | 0.001297669 |
| 229906_at   | 0.048985653 | 1.314914112 | 0.193664337 | 0.353694027 |
| 229907_at   | -0.05631402 | -1.78127554 | 0.080052993 | 0.183812595 |
| 229908_s_at | 0.037914417 | 0.726381994 | 0.470497846 | 0.647066683 |
| 229909_at   | -0.10868417 | -2.54389925 | 0.013621883 | 0.044877897 |
| 229910_at   | 0.069339196 | 1.285651357 | 0.203625127 | 0.366508827 |
| 229911_at   | 0.007728862 | 0.146421081 | 0.884091827 | 0.938012663 |
| 229912_at   | 0.137480528 | 3.082867144 | 0.003124287 | 0.013290561 |
| 229913_at   | 0.305957331 | 4.071848482 | 0.000141828 | 0.000988704 |
| 229914_at   | 0.208069031 | 6.148361962 | 7.51E-08    | 2.02E-06    |
| 229915_at   | -0.03884116 | -1.03615045 | 0.304391326 | 0.484340997 |

|             |             |             |             |             |
|-------------|-------------|-------------|-------------|-------------|
| 229916_at   | -0.07081524 | -1.34407013 | 0.184109362 | 0.341334755 |
| 229917_at   | -0.67242542 | -7.95275503 | 6.90E-11    | 1.72E-08    |
| 229918_at   | 0.067770872 | 1.355193504 | 0.180559878 | 0.336817239 |
| 229919_at   | -0.06539377 | -2.35269375 | 0.022017827 | 0.06659588  |
| 229920_at   | 0.019804235 | 0.662909251 | 0.509989374 | 0.680879615 |
| 229921_at   | -0.80670112 | -8.26779692 | 2.04E-11    | 8.58E-09    |
| 229922_at   | -0.06605774 | -1.84387861 | 0.070261384 | 0.166144009 |
| 229923_at   | -0.04044444 | -0.87358656 | 0.385911441 | 0.568593747 |
| 229924_s_at | 0.016537557 | 0.544150769 | 0.588403481 | 0.743060988 |
| 229925_at   | -0.16884115 | -3.64627207 | 0.00056693  | 0.003185071 |
| 229926_at   | 0.295969861 | 3.583406011 | 0.00069111  | 0.003756639 |
| 229927_at   | -0.02523549 | -0.81576494 | 0.417940039 | 0.600390303 |
| 229928_at   | -0.11527736 | -3.53472652 | 0.000804658 | 0.004249292 |
| 229929_at   | -0.02652769 | -0.83501131 | 0.407104745 | 0.589461714 |
| 229930_at   | 0.082706349 | 2.290956569 | 0.025581934 | 0.075084246 |
| 229931_at   | -0.03049081 | -0.90064063 | 0.371468103 | 0.554664143 |
| 229932_at   | 0.000723944 | 0.024507482 | 0.980531129 | 0.990272663 |
| 229933_at   | -0.08392514 | -2.26532985 | 0.027205888 | 0.078718472 |
| 229934_at   | 0.022387842 | 0.55755427  | 0.57927372  | 0.735919187 |
| 229935_s_at | -0.0374867  | -0.9834649  | 0.329424173 | 0.511895454 |
| 229936_at   | 0.010706047 | 0.29795542  | 0.766791653 | 0.866133866 |
| 229937_x_at | 0.118236886 | 1.675625035 | 0.099143203 | 0.216173491 |
| 229938_at   | -0.02930012 | -0.59629979 | 0.553272869 | 0.715745827 |
| 229939_at   | -0.0857627  | -2.78974705 | 0.007106718 | 0.026377662 |
| 229940_at   | -0.12283668 | -2.40718297 | 0.019247538 | 0.059770079 |
| 229941_at   | 0.096502337 | 1.959712231 | 0.054793846 | 0.137090443 |
| 229942_at   | -0.00130678 | -0.02848069 | 0.9773756   | 0.988635229 |
| 229943_at   | 0.365278464 | 4.951387053 | 6.58E-06    | 7.57E-05    |
| 229944_at   | -0.7379974  | -5.16936081 | 2.97E-06    | 3.92E-05    |
| 229945_at   | 0.037997159 | 0.865729473 | 0.390171181 | 0.573107246 |
| 229946_at   | -0.41105536 | -6.77335573 | 6.75E-09    | 3.39E-07    |
| 229947_at   | 0.005975443 | 0.05816622  | 0.953814237 | 0.976252469 |
| 229948_at   | 0.031958015 | 0.816539183 | 0.417500819 | 0.599869687 |
| 229949_at   | 0.183112753 | 4.208808583 | 8.94E-05    | 0.000670546 |
| 229950_s_at | 0.039502696 | 1.302151516 | 0.197962564 | 0.359035099 |
| 229951_x_at | 0.121594547 | 1.248136138 | 0.216948178 | 0.383113954 |
| 229952_at   | 0.186370954 | 2.912518019 | 0.005066908 | 0.019926983 |
| 229953_x_at | 0.282237146 | 3.614599931 | 0.000626561 | 0.00346272  |
| 229954_at   | 0.300348104 | 4.654518063 | 1.91E-05    | 0.00018331  |
| 229955_at   | -0.04303015 | -0.94359133 | 0.349254949 | 0.532346225 |
| 229956_at   | 0.03330408  | 1.026100334 | 0.309063791 | 0.489612216 |
| 229957_at   | -0.15784478 | -2.92067424 | 0.004952781 | 0.019572877 |
| 229958_at   | 0.063583438 | 0.930431184 | 0.355967341 | 0.539046942 |
| 229959_at   | -0.01113359 | -0.32336247 | 0.747572558 | 0.854423261 |
| 229960_at   | -0.10487015 | -2.4756819  | 0.016210319 | 0.051881378 |
| 229961_x_at | -0.78029979 | -6.64172274 | 1.12E-08    | 4.87E-07    |
| 229962_at   | 0.08084726  | 2.075052337 | 0.04238402  | 0.111992798 |
| 229963_at   | -0.91971004 | -6.24856966 | 5.11E-08    | 1.50E-06    |
| 229964_at   | -0.09424253 | -3.72224763 | 0.000445188 | 0.002595402 |
| 229965_at   | -0.02037936 | -0.42481314 | 0.672529578 | 0.802967833 |
| 229966_at   | 0.191493379 | 4.154195552 | 0.000107568 | 0.000783358 |
| 229967_at   | -0.03493424 | -0.87681958 | 0.384167143 | 0.566836314 |
| 229968_at   | 0.125839346 | 2.704591299 | 0.00893991  | 0.03185382  |
| 229969_at   | -0.21359305 | -3.51006966 | 0.00086874  | 0.004530954 |
| 229970_at   | -0.01930852 | -0.40245487 | 0.688814485 | 0.814641259 |
| 229971_at   | -0.00628296 | -0.20053739 | 0.841755092 | 0.913094377 |
| 229972_at   | -0.01458476 | -0.38590677 | 0.700964019 | 0.823367429 |
| 229973_at   | -1.07387468 | -7.36756404 | 6.71E-10    | 7.12E-08    |
| 229974_at   | 0.146589811 | 3.20098269  | 0.002213728 | 0.009929339 |
| 229975_at   | 0.692864315 | 6.408670416 | 2.76E-08    | 9.34E-07    |
| 229976_at   | 0.298353637 | 3.175601818 | 0.002385323 | 0.010565398 |
| 229977_at   | -0.04768161 | -1.71054239 | 0.09245845  | 0.205120528 |
| 229978_at   | -0.41978401 | -5.9213702  | 1.78E-07    | 3.95E-06    |
| 229979_x_at | 0.06804594  | 2.099776489 | 0.040066481 | 0.106993974 |
| 229980_s_at | 0.040196223 | 0.761253701 | 0.449559983 | 0.628987095 |
| 229981_at   | 0.026886908 | 0.730230338 | 0.468160412 | 0.645214788 |
| 229982_at   | 0.092050994 | 1.645345996 | 0.105255612 | 0.226321088 |
| 229983_at   | -0.00993675 | -0.19841537 | 0.843407242 | 0.91393828  |
| 229984_at   | -0.08770177 | -3.58099679 | 0.000696351 | 0.003778691 |
| 229985_at   | 0.172786249 | 3.212316769 | 0.002140909 | 0.00965115  |
| 229986_at   | 0.061133008 | 1.737985659 | 0.087469026 | 0.196775288 |
| 229987_at   | 0.047922858 | 1.315552765 | 0.193451111 | 0.353362367 |
| 229988_at   | 0.066097528 | 2.564018109 | 0.012933431 | 0.043011248 |
| 229989_at   | 0.017361838 | 0.579777812 | 0.564288272 | 0.724800023 |
| 229990_at   | -0.00288459 | -0.08245328 | 0.934567427 | 0.965950219 |

|             |             |             |             |              |
|-------------|-------------|-------------|-------------|--------------|
| 229991_s_at | 0.053342717 | 1.772707323 | 0.081477738 | 0.186299144  |
| 229992_at   | -0.01902964 | -0.46424161 | 0.64419576  | 0.783891459  |
| 229993_at   | -0.10149951 | -3.04065204 | 0.00352727  | 0.014728652  |
| 229994_at   | -0.04115164 | -0.53702706 | 0.593283374 | 0.746544487  |
| 229995_at   | -0.01976799 | -0.47453344 | 0.636884219 | 0.778716062  |
| 229996_s_at | 0.033223034 | 1.168567234 | 0.247312741 | 0.419083227  |
| 229997_at   | 0.136147707 | 2.695874452 | 0.009150176 | 0.03249163   |
| 229998_x_at | 0.004252209 | 0.120022387 | 0.904876204 | 0.949580335  |
| 229999_at   | 0.015756615 | 0.600531772 | 0.550468842 | 0.713365689  |
| 230000_at   | 0.331184025 | 4.566503148 | 2.60E-05    | 0.000238342  |
| 230001_at   | -0.16233007 | -5.0320896  | 4.91E-06    | 5.94E-05     |
| 230002_at   | 0.394685163 | 4.771260593 | 1.26E-05    | 0.000129029  |
| 230003_at   | -0.17689666 | -3.96097952 | 0.000204949 | 0.001343439  |
| 230004_at   | 0.072457469 | 1.993615814 | 0.050858083 | 0.12919624   |
| 230005_at   | -0.40452884 | -6.15716144 | 7.26E-08    | 1.96E-06     |
| 230006_s_at | -0.6966158  | -8.08893556 | 4.07E-11    | 1.29E-08     |
| 230007_at   | 0.051780482 | 1.565565997 | 0.122838027 | 0.254043364  |
| 230008_at   | -0.09552853 | -2.03368794 | 0.046521678 | 0.120565198  |
| 230009_at   | -0.05138761 | -1.3368572  | 0.186439185 | 0.344226226  |
| 230010_at   | -0.08181638 | -2.36219808 | 0.021510372 | 0.065344041  |
| 230011_at   | 0.026701326 | 1.12667631  | 0.264474662 | 0.43936888   |
| 230012_at   | -0.02718695 | -0.81337992 | 0.41929479  | 0.601576974  |
| 230013_s_at | 0.05042866  | 1.364569793 | 0.177608587 | 0.33286529   |
| 230014_at   | -0.00951615 | -0.22843177 | 0.820106321 | 0.899837761  |
| 230015_at   | 0.035998762 | 0.671930007 | 0.504270362 | 0.676219434  |
| 230016_at   | -0.15129268 | -3.10608591 | 0.002921414 | 0.012546978  |
| 230017_at   | 0.006110521 | 0.195440848 | 0.845724327 | 0.915272947  |
| 230018_at   | 0.081189768 | 2.513434978 | 0.014727679 | 0.047838463  |
| 230019_s_at | -0.04176223 | -1.21023919 | 0.231049051 | 0.399213028  |
| 230020_at   | -0.02901429 | -0.80714958 | 0.422846245 | 0.60473102   |
| 230021_at   | 0.013284277 | 0.388890868 | 0.698767191 | 0.82177754   |
| 230022_at   | 0.036967843 | 1.073768682 | 0.287330637 | 0.465503546  |
| 230023_at   | -0.12114304 | -4.32489981 | 6.02E-05    | 0.000480243  |
| 230024_at   | 0.028337932 | 0.991070595 | 0.325728189 | 0.507900503  |
| 230025_at   | -0.15513731 | -3.89292809 | 0.000256289 | 0.001627459  |
| 230026_at   | 0.08353678  | 1.313632586 | 0.194092733 | 0.354114648  |
| 230027_s_at | -0.01435778 | -0.24964741 | 0.80373359  | 0.889538685  |
| 230028_at   | -0.07747383 | -2.04692409 | 0.04516125  | 0.117835978  |
| 230029_x_at | -0.32608537 | -4.02959859 | 0.000163281 | 0.0011110371 |
| 230030_at   | -1.24764178 | -6.25496283 | 4.99E-08    | 1.47E-06     |
| 230031_at   | 0.126090798 | 2.252649988 | 0.028042653 | 0.080653982  |
| 230032_at   | 0.151203626 | 3.154461327 | 0.002537703 | 0.011139873  |
| 230033_at   | 0.208248236 | 2.830570129 | 0.006356731 | 0.024031047  |
| 230034_x_at | -0.05994731 | -1.56008419 | 0.124127862 | 0.256141953  |
| 230035_at   | 0.062055607 | 1.606972393 | 0.113439046 | 0.239266498  |
| 230036_at   | 0.055895446 | 1.224028529 | 0.225842825 | 0.393396248  |
| 230037_at   | -0.02133247 | -0.66008029 | 0.511790036 | 0.682588674  |
| 230038_at   | -0.05189176 | -1.76743455 | 0.082364953 | 0.187674848  |
| 230039_at   | 0.07623503  | 2.667034661 | 0.009878518 | 0.03454086   |
| 230040_at   | 0.239904655 | 2.046819388 | 0.045171875 | 0.117839214  |
| 230041_at   | -0.00316158 | -0.08846949 | 0.929805357 | 0.963456934  |
| 230042_at   | -0.46621656 | -5.39574244 | 1.29E-06    | 1.96E-05     |
| 230043_at   | -0.24207441 | -3.16638261 | 0.002450688 | 0.010809922  |
| 230044_at   | -0.04595834 | -0.97860056 | 0.331802553 | 0.514341436  |
| 230045_at   | 0.418237326 | 3.456119412 | 0.001026286 | 0.005209767  |
| 230046_at   | -0.07965478 | -1.54545738 | 0.127622547 | 0.261553945  |
| 230047_at   | 0.162667248 | 3.973306629 | 0.000196776 | 0.001299396  |
| 230048_at   | 0.004805378 | 0.127485567 | 0.898992819 | 0.945984334  |
| 230049_at   | -0.00305719 | -0.11048067 | 0.912405908 | 0.95369752   |
| 230050_at   | 0.065547746 | 1.660461861 | 0.102166871 | 0.221255114  |
| 230051_at   | -0.08289765 | -2.5943956  | 0.011953629 | 0.04034677   |
| 230052_s_at | -0.03408597 | -0.97309422 | 0.334508539 | 0.517313943  |
| 230053_at   | 0.205613601 | 3.755519018 | 0.000400148 | 0.002372747  |
| 230054_at   | 0.113912117 | 2.778465612 | 0.007327899 | 0.027034709  |
| 230055_at   | -0.12611826 | -2.73565083 | 0.00822618  | 0.029771191  |
| 230056_at   | 0.081220041 | 2.073700239 | 0.042514049 | 0.112229052  |
| 230057_at   | -0.11378011 | -3.15896773 | 0.002504475 | 0.011012396  |
| 230058_at   | 0.1141336   | 2.956097024 | 0.004484253 | 0.018041974  |
| 230059_at   | 0.00608155  | 0.189948667 | 0.850006188 | 0.917729057  |
| 230060_at   | -0.03772414 | -1.60538549 | 0.113788238 | 0.239889804  |
| 230061_at   | 0.175063037 | 2.166467086 | 0.034356914 | 0.094871574  |
| 230062_at   | -0.09615645 | -3.27878014 | 0.001757258 | 0.008181622  |
| 230063_at   | 0.024131635 | 0.603470229 | 0.548526109 | 0.711768447  |
| 230064_at   | -0.17339001 | -2.26474293 | 0.027244126 | 0.078813806  |
| 230065_at   | -0.04538417 | -1.92929094 | 0.058544316 | 0.144141834  |



|             |             |             |             |             |
|-------------|-------------|-------------|-------------|-------------|
| 230066_at   | 0.014488856 | 0.368605343 | 0.713751034 | 0.831970099 |
| 230067_at   | 0.345588327 | 4.314225286 | 6.24E-05    | 0.000495203 |
| 230068_s_at | -0.34119503 | -3.98437345 | 0.000189707 | 0.001259603 |
| 230069_at   | -0.34964903 | -4.55092274 | 2.75E-05    | 0.000249132 |
| 230070_at   | -0.30833783 | -5.41183884 | 1.21E-06    | 1.87E-05    |
| 230071_at   | 0.331255973 | 3.468882599 | 0.000986734 | 0.00504163  |
| 230072_at   | 0.083243164 | 2.099555555 | 0.040086692 | 0.10704155  |
| 230073_at   | -0.03506886 | -0.699972   | 0.486716024 | 0.66120471  |
| 230074_s_at | -0.04788498 | -1.34134049 | 0.184988438 | 0.342410573 |
| 230075_at   | -0.30769177 | -4.88763464 | 8.29E-06    | 9.13E-05    |
| 230076_at   | -0.94614457 | -6.59250996 | 1.36E-08    | 5.62E-07    |
| 230077_at   | -0.14332502 | -1.57462029 | 0.120731146 | 0.250718663 |
| 230078_at   | -0.02827491 | -0.31770635 | 0.751837697 | 0.857266523 |
| 230079_at   | 0.090949746 | 2.691572968 | 0.009255595 | 0.032800812 |
| 230080_at   | -0.04137472 | -0.98924027 | 0.326615096 | 0.508839202 |
| 230081_at   | 0.143612944 | 1.897542931 | 0.062689364 | 0.152283567 |
| 230082_at   | 0.183214528 | 4.057346899 | 0.000148865 | 0.00102782  |
| 230083_at   | 0.466468597 | 4.029195436 | 0.0001635   | 0.001111185 |
| 230084_at   | -0.02505488 | -0.81117211 | 0.420551236 | 0.602547874 |
| 230085_at   | -0.35920319 | -4.86294925 | 9.06E-06    | 9.84E-05    |
| 230086_at   | 0.239344483 | 2.837476321 | 0.006237323 | 0.023663706 |
| 230087_at   | 0.227493743 | 3.273347034 | 0.001786008 | 0.0082956   |
| 230088_at   | -0.04309602 | -1.36799074 | 0.176541026 | 0.331302605 |
| 230089_s_at | -0.04334484 | -1.1121581  | 0.270614648 | 0.446333906 |
| 230090_at   | -0.04916521 | -1.58456365 | 0.118450911 | 0.247270218 |
| 230091_at   | -0.05668    | -0.776786   | 0.440411191 | 0.620871142 |
| 230092_at   | 0.081657384 | 2.100813505 | 0.039971732 | 0.106785625 |
| 230093_at   | 0.112467661 | 0.857971956 | 0.394405584 | 0.577018933 |
| 230094_at   | -0.01622281 | -0.48694375 | 0.628115713 | 0.772525305 |
| 230095_at   | -0.00772293 | -0.22486086 | 0.822870239 | 0.901631635 |
| 230096_at   | -0.11597649 | -2.79207523 | 0.007061844 | 0.026235073 |
| 230097_at   | 0.164179889 | 3.466903333 | 0.000992772 | 0.005063793 |
| 230098_at   | -0.09076689 | -2.1977582  | 0.031933057 | 0.089541729 |
| 230099_at   | 0.151608582 | 2.780181559 | 0.007293853 | 0.026931335 |
| 230100_x_at | -0.36268472 | -5.77488548 | 3.11E-07    | 6.15E-06    |
| 230101_at   | -0.0106917  | -0.33023794 | 0.742398607 | 0.850740033 |
| 230102_at   | -0.18223071 | -3.0886132  | 0.003072889 | 0.01310935  |
| 230103_at   | -0.00416884 | -0.11116027 | 0.911869337 | 0.953404244 |
| 230104_s_at | 0.176725452 | 1.960951945 | 0.054645469 | 0.136818784 |
| 230105_at   | -0.03476877 | -0.78554405 | 0.435301197 | 0.615999021 |
| 230106_at   | 0.042774957 | 1.077369312 | 0.285733068 | 0.463553879 |
| 230107_at   | -0.06146321 | -1.86584111 | 0.067074125 | 0.160458024 |
| 230108_at   | 0.037576196 | 1.31940014  | 0.192170331 | 0.351669661 |
| 230109_at   | -0.60365242 | -6.90726402 | 4.01E-09    | 2.37E-07    |
| 230110_at   | -0.05489261 | -1.23886953 | 0.220336079 | 0.387306197 |
| 230111_at   | -0.01536401 | -0.43808595 | 0.662935575 | 0.796576239 |
| 230112_at   | -0.48633959 | -6.58506414 | 1.40E-08    | 5.73E-07    |
| 230113_at   | 0.032579922 | 1.049547295 | 0.29823807  | 0.477343259 |
| 230114_at   | -0.01459661 | -0.36181838 | 0.718789952 | 0.835478817 |
| 230115_at   | -0.03052842 | -0.95049251 | 0.345768133 | 0.528888678 |
| 230116_at   | -0.02138437 | -0.61442582 | 0.541313673 | 0.706584984 |
| 230117_at   | -0.66316892 | -5.35649932 | 1.49E-06    | 2.22E-05    |
| 230118_at   | 0.046921944 | 1.347008756 | 0.183166531 | 0.340126019 |
| 230119_at   | -0.0445928  | -1.36206468 | 0.17839347  | 0.333936542 |
| 230120_s_at | -0.01419066 | -0.23654369 | 0.813836183 | 0.895640647 |
| 230121_at   | -0.07129216 | -1.57008549 | 0.121782713 | 0.252304515 |
| 230122_at   | 0.03973345  | 1.251365511 | 0.215776587 | 0.381769091 |
| 230123_at   | 0.024186164 | 0.546442344 | 0.586837755 | 0.741796384 |
| 230124_at   | 0.03560099  | 0.893563632 | 0.375212683 | 0.558311435 |
| 230125_at   | 0.075826362 | 1.795710823 | 0.077699645 | 0.179460079 |
| 230126_s_at | 0.075608074 | 2.320264251 | 0.023830638 | 0.07101206  |
| 230127_at   | -0.17616337 | -6.38768753 | 2.99E-08    | 9.93E-07    |
| 230128_at   | 0.035466428 | 1.122840692 | 0.266087152 | 0.44129312  |
| 230129_at   | -0.19451162 | -3.7831087  | 0.000366142 | 0.002197047 |
| 230130_at   | -0.58766636 | -5.11045011 | 3.69E-06    | 4.70E-05    |
| 230131_x_at | 0.13125982  | 3.329823577 | 0.001507666 | 0.007191867 |
| 230132_at   | 0.124945741 | 2.277395134 | 0.026430278 | 0.077043575 |
| 230133_at   | -0.02035926 | -0.66794846 | 0.506790313 | 0.678290389 |
| 230134_s_at | -0.10226476 | -2.40901133 | 0.019160255 | 0.059540405 |
| 230135_at   | 0.246247716 | 1.847734159 | 0.069692802 | 0.165192825 |
| 230136_at   | 0.050042605 | 1.343980139 | 0.184138293 | 0.341356942 |
| 230137_at   | -0.07247886 | -1.67780206 | 0.098715159 | 0.215439881 |
| 230138_at   | -0.03719865 | -1.12132768 | 0.266725126 | 0.442023113 |
| 230139_at   | -8.70E-05   | -0.00218847 | 0.99826129  | 0.999112838 |
| 230140_at   | -0.02777849 | -0.62846099 | 0.532145359 | 0.699180961 |

|             |             |             |             |             |
|-------------|-------------|-------------|-------------|-------------|
| 230141_at   | -0.10197886 | -1.92136585 | 0.059556532 | 0.146150918 |
| 230142_s_at | 0.029177046 | 0.220967022 | 0.825886673 | 0.903451895 |
| 230143_at   | -0.20879388 | -5.14588233 | 3.24E-06    | 4.22E-05    |
| 230144_at   | -0.97839702 | -6.61904729 | 1.23E-08    | 5.22E-07    |
| 230145_at   | 0.009114796 | 0.306675848 | 0.760177814 | 0.861887129 |
| 230146_s_at | -0.6128167  | -6.28478136 | 4.45E-08    | 1.34E-06    |
| 230147_at   | -0.0394093  | -0.78070885 | 0.438118003 | 0.61859444  |
| 230148_at   | 0.272061189 | 4.509969599 | 3.17E-05    | 0.000280311 |
| 230149_at   | -0.11911365 | -2.75506607 | 0.007806993 | 0.028503402 |
| 230150_at   | -0.04546128 | -0.90764983 | 0.36778292  | 0.550958889 |
| 230151_at   | -0.25557447 | -4.45507966 | 3.84E-05    | 0.000331161 |
| 230152_at   | 0.191426089 | 2.400491589 | 0.019570024 | 0.060528271 |
| 230153_at   | -0.03852025 | -0.92521822 | 0.358649162 | 0.541713945 |
| 230154_at   | -0.27154261 | -4.6834168  | 1.72E-05    | 0.000167954 |
| 230155_x_at | -0.05032769 | -1.33080003 | 0.188412896 | 0.346638775 |
| 230156_x_at | -0.05536817 | -1.68564529 | 0.097185568 | 0.212964815 |
| 230157_at   | -0.04657988 | -1.58567022 | 0.118199305 | 0.246848754 |
| 230158_at   | -0.32057664 | -4.55897352 | 2.67E-05    | 0.000243379 |
| 230159_at   | -0.00325151 | -0.08687852 | 0.93106443  | 0.964097603 |
| 230160_x_at | 0.068627156 | 1.797705082 | 0.077379115 | 0.178904677 |
| 230161_at   | 0.007449691 | 0.252149449 | 0.801808348 | 0.88822176  |
| 230162_s_at | 0.020564957 | 0.578807927 | 0.564938257 | 0.725366184 |
| 230163_at   | -0.08042142 | -3.23363822 | 0.002009988 | 0.009144936 |
| 230164_at   | 0.308292876 | 6.157549114 | 7.25E-08    | 1.96E-06    |
| 230165_at   | -0.00835191 | -0.23344207 | 0.816232172 | 0.897261123 |
| 230166_at   | 0.231984957 | 4.887002194 | 8.31E-06    | 9.15E-05    |
| 230167_at   | 0.027326398 | 0.822851859 | 0.413930133 | 0.596164454 |
| 230168_at   | 0.030737915 | 0.763006451 | 0.448522081 | 0.628046146 |
| 230169_at   | 0.088679579 | 2.665767782 | 0.009911695 | 0.034634361 |
| 230170_at   | -0.03139176 | -0.67888435 | 0.499885218 | 0.672563896 |
| 230171_at   | 0.05022737  | 1.6950688   | 0.095373552 | 0.209941131 |
| 230172_at   | 0.088675417 | 2.721806643 | 0.008537594 | 0.030684533 |
| 230173_at   | 0.006333296 | 0.172872744 | 0.863347516 | 0.925803853 |
| 230174_at   | 0.176363754 | 2.724481142 | 0.008476604 | 0.030520296 |
| 230175_s_at | 0.080939345 | 1.203042648 | 0.23380063  | 0.402582076 |
| 230176_at   | 0.074654191 | 2.20758791  | 0.031203311 | 0.087867076 |
| 230177_at   | 0.057906514 | 0.735423279 | 0.46501677  | 0.642864683 |
| 230178_s_at | -0.04089666 | -0.82669503 | 0.411765397 | 0.594035285 |
| 230179_at   | -0.5157617  | -4.93206347 | 7.06E-06    | 8.04E-05    |
| 230180_at   | 0.337394523 | 2.995104659 | 0.00401615  | 0.016447336 |
| 230181_at   | -0.00840097 | -0.23269124 | 0.816812448 | 0.897722357 |
| 230182_at   | 0.124527589 | 3.467460698 | 0.000991068 | 0.005057412 |
| 230183_at   | -0.01076473 | -0.2929051  | 0.770629988 | 0.868746406 |
| 230184_at   | 0.051876973 | 1.338134086 | 0.186025123 | 0.343774181 |
| 230185_at   | 0.259793222 | 5.691547613 | 4.26E-07    | 7.97E-06    |
| 230186_at   | -0.03200771 | -1.1167762  | 0.268650801 | 0.444127454 |
| 230187_s_at | -0.10224643 | -1.76954767 | 0.082008433 | 0.187062771 |
| 230188_at   | 0.004254004 | 0.131865253 | 0.895542847 | 0.944099563 |
| 230189_x_at | -0.04902202 | -1.78307434 | 0.079756536 | 0.183235445 |
| 230190_at   | 0.063312531 | 1.735026701 | 0.087996045 | 0.197653879 |
| 230191_at   | -0.19949425 | -4.65721346 | 1.89E-05    | 0.000181949 |
| 230192_at   | 0.268288983 | 4.442950279 | 4.00E-05    | 0.000342377 |
| 230193_at   | 0.154697041 | 1.519396048 | 0.134043313 | 0.271193469 |
| 230194_at   | -0.23550796 | -4.61164211 | 2.22E-05    | 0.000208414 |
| 230195_at   | -0.07612482 | -2.45530523 | 0.01706528  | 0.05413696  |
| 230196_x_at | -0.03575935 | -0.94036816 | 0.350891273 | 0.534098135 |
| 230197_s_at | -0.01506813 | -0.35656395 | 0.722699697 | 0.837974649 |
| 230198_at   | 0.109540836 | 2.629648336 | 0.010901501 | 0.037374184 |
| 230199_at   | 0.106962052 | 2.947990789 | 0.004587687 | 0.018375418 |
| 230200_at   | 0.33970424  | 6.973393075 | 3.11E-09    | 1.97E-07    |
| 230201_at   | 0.305665845 | 4.703916495 | 1.60E-05    | 0.000158658 |
| 230202_at   | -0.03353386 | -0.83857704 | 0.405116342 | 0.587496254 |
| 230203_at   | 0.111159091 | 2.803271948 | 0.00684966  | 0.025577672 |
| 230204_at   | -0.11958236 | -2.72152528 | 0.008544034 | 0.030702999 |
| 230205_at   | -0.02968096 | -0.98829645 | 0.327073066 | 0.509322281 |
| 230206_at   | 0.325755105 | 2.987139513 | 0.00410787  | 0.016759991 |
| 230207_s_at | 0.37729541  | 3.675561355 | 0.000516641 | 0.002944365 |
| 230208_at   | 0.007140591 | 0.202839773 | 0.839963319 | 0.911842421 |
| 230209_at   | 0.176676625 | 2.584762272 | 0.012256782 | 0.041171069 |
| 230210_at   | 0.03661466  | 1.299085021 | 0.199005896 | 0.36050772  |
| 230211_at   | 0.110262889 | 2.402664916 | 0.019464755 | 0.060297972 |
| 230212_at   | -0.02373127 | -0.59104807 | 0.556762514 | 0.718896293 |
| 230213_at   | 0.055077299 | 2.142714928 | 0.036303006 | 0.099109633 |
| 230214_at   | 0.7485294   | 4.194650074 | 9.38E-05    | 0.000697666 |
| 230215_at   | -0.00204704 | -0.06104346 | 0.951532436 | 0.975128584 |

|             |             |             |             |             |
|-------------|-------------|-------------|-------------|-------------|
| 230216_at   | -0.04712923 | -1.58100262 | 0.119263521 | 0.248349292 |
| 230217_at   | -0.30148024 | -5.4620528  | 1.01E-06    | 1.61E-05    |
| 230218_at   | 0.07105995  | 1.313808267 | 0.194033963 | 0.354079698 |
| 230219_at   | 0.133589686 | 3.01298158  | 0.003817192 | 0.015762573 |
| 230220_at   | -0.91187491 | -6.55421226 | 1.58E-08    | 6.24E-07    |
| 230221_at   | 0.007327264 | 0.124798883 | 0.901110152 | 0.94727419  |
| 230222_at   | -0.0808143  | -1.96370391 | 0.054317322 | 0.136119198 |
| 230223_at   | -0.06585705 | -2.13889595 | 0.03662474  | 0.099752142 |
| 230224_at   | -0.08163747 | -1.86911175 | 0.066610085 | 0.159622729 |
| 230225_x_at | -0.05329852 | -2.13528812 | 0.036930972 | 0.100414856 |
| 230226_s_at | 0.131892523 | 2.717275811 | 0.008641837 | 0.030991893 |
| 230227_at   | -0.07367752 | -1.8736578  | 0.065969596 | 0.158409262 |
| 230228_at   | 0.080269755 | 1.810523632 | 0.075345115 | 0.175255748 |
| 230229_at   | 0.3766844   | 4.499945883 | 3.28E-05    | 0.000289097 |
| 230230_at   | -0.08042136 | -2.99946173 | 0.003966788 | 0.016288467 |
| 230231_at   | -0.84006513 | -7.82499255 | 1.13E-10    | 2.24E-08    |
| 230232_at   | -0.04369352 | -1.21914946 | 0.227675034 | 0.395155442 |
| 230233_at   | -0.82476132 | -6.92798286 | 3.70E-09    | 2.24E-07    |
| 230234_at   | 0.00997628  | 0.383432725 | 0.702787307 | 0.824512267 |
| 230235_at   | -0.08595531 | -2.8602355  | 0.005858323 | 0.022452634 |
| 230236_at   | -0.0267517  | -0.80846404 | 0.422095467 | 0.604067249 |
| 230237_at   | -0.06276975 | -1.68313217 | 0.097673549 | 0.213736187 |
| 230238_at   | -1.03770653 | -7.50089725 | 3.99E-10    | 5.03E-08    |
| 230239_at   | 0.0451797   | 1.10709051  | 0.272781233 | 0.448847203 |
| 230240_at   | 0.136056772 | 3.250374731 | 0.001912538 | 0.0087838   |
| 230241_at   | 0.050849245 | 1.516484767 | 0.134776212 | 0.272318752 |
| 230242_at   | 0.137761257 | 3.819043606 | 0.000325986 | 0.001995328 |
| 230243_at   | 0.073333586 | 1.540348493 | 0.128861518 | 0.263416684 |
| 230244_at   | 0.436170089 | 2.850859205 | 0.006011808 | 0.022940552 |
| 230245_s_at | 0.120300637 | 2.308960662 | 0.024493045 | 0.072541958 |
| 230246_at   | -0.01778159 | -0.47887559 | 0.633810252 | 0.776710727 |
| 230247_at   | 0.018329118 | 0.449100747 | 0.655016489 | 0.790974415 |
| 230248_x_at | 0.030447617 | 1.243585847 | 0.218606944 | 0.385270522 |
| 230249_at   | 0.113421693 | 2.124139269 | 0.037891461 | 0.102429338 |
| 230250_at   | 0.143961035 | 1.615512549 | 0.111574657 | 0.236483665 |
| 230251_at   | -0.03099344 | -0.93469253 | 0.353784742 | 0.536887868 |
| 230252_at   | 0.147686535 | 2.141318873 | 0.03642033  | 0.099328578 |
| 230253_at   | 0.014551969 | 0.499919803 | 0.619004728 | 0.766075244 |
| 230254_at   | -0.03447742 | -0.93646494 | 0.352879502 | 0.536023747 |
| 230255_at   | -0.76078272 | -7.21723223 | 1.20E-09    | 1.07E-07    |
| 230256_at   | 0.080683963 | 2.413808873 | 0.01893291  | 0.058965119 |
| 230257_s_at | -0.02471864 | -0.80583178 | 0.423599738 | 0.605169564 |
| 230258_at   | 0.50063363  | 4.7359251   | 1.43E-05    | 0.000143593 |
| 230259_at   | 0.050962986 | 1.378836636 | 0.173188822 | 0.326740463 |
| 230260_s_at | 0.018729739 | 0.531623769 | 0.596997382 | 0.749466488 |
| 230261_at   | -0.00807551 | -0.30848531 | 0.758807698 | 0.861205587 |
| 230262_at   | -1.09810882 | -6.5150523  | 1.83E-08    | 6.95E-07    |
| 230263_s_at | 0.579991519 | 5.283105909 | 1.96E-06    | 2.79E-05    |
| 230264_s_at | -0.22117304 | -2.88562306 | 0.00546074  | 0.021185679 |
| 230265_at   | -0.20091279 | -2.67702243 | 0.009620486 | 0.033815081 |
| 230266_at   | 0.049217266 | 1.119690214 | 0.267416793 | 0.442709709 |
| 230267_at   | 0.031935989 | 0.912677553 | 0.365153965 | 0.548513312 |
| 230268_at   | -0.06062016 | -1.48310298 | 0.143408714 | 0.28480369  |
| 230269_at   | -0.20230387 | -4.71971501 | 1.51E-05    | 0.000150983 |
| 230270_at   | 0.284207696 | 4.488287734 | 3.42E-05    | 0.000299625 |
| 230271_at   | -0.72410024 | -7.55942224 | 3.18E-10    | 4.42E-08    |
| 230272_at   | -0.03309291 | -0.35783435 | 0.721753722 | 0.837342659 |
| 230273_at   | 0.101271497 | 1.762943968 | 0.083126876 | 0.18901584  |
| 230274_s_at | -0.066975   | -2.14570772 | 0.036052604 | 0.098542166 |
| 230275_at   | -0.0036176  | -0.12347452 | 0.902154124 | 0.948016657 |
| 230276_at   | -0.34809427 | -6.24496087 | 5.18E-08    | 1.51E-06    |
| 230277_at   | 0.063084816 | 1.716986865 | 0.091266202 | 0.2031107   |
| 230278_at   | -0.08286357 | -1.72670149 | 0.089492949 | 0.200141056 |
| 230279_at   | -0.05228617 | -1.78299278 | 0.079769959 | 0.183256863 |
| 230280_at   | -0.45169552 | -5.11240882 | 3.67E-06    | 4.68E-05    |
| 230281_at   | 0.146124437 | 2.254158371 | 0.027941934 | 0.080418639 |
| 230282_at   | 0.063961175 | 1.908596209 | 0.06121883  | 0.149377154 |
| 230283_at   | 0.052197674 | 1.685084095 | 0.097294364 | 0.213143611 |
| 230284_at   | -0.02587669 | -0.76488336 | 0.447412207 | 0.627101121 |
| 230285_at   | -0.51633622 | -5.73682831 | 3.59E-07    | 6.92E-06    |
| 230286_at   | 0.234481268 | 3.352041862 | 0.001409833 | 0.006805816 |
| 230287_at   | -0.38168319 | -4.1401885  | 0.000112768 | 0.000814849 |
| 230288_at   | -0.60670877 | -7.0055901  | 2.74E-09    | 1.80E-07    |
| 230289_at   | -0.01061627 | -0.44188752 | 0.660198008 | 0.794570189 |
| 230290_at   | -0.0580685  | -2.26827182 | 0.02701493  | 0.078287591 |

|             |             |             |             |             |
|-------------|-------------|-------------|-------------|-------------|
| 230291_s_at | 0.501936446 | 4.523077949 | 3.03E-05    | 0.000270429 |
| 230292_at   | 0.190300291 | 3.903367783 | 0.000247679 | 0.001581776 |
| 230293_at   | -0.17275674 | -3.76245438 | 0.000391325 | 0.002327846 |
| 230294_at   | -0.04988674 | -1.0322739  | 0.306187868 | 0.48630542  |
| 230295_at   | -0.04480044 | -1.3129701  | 0.194314472 | 0.35434674  |
| 230296_at   | -0.1442606  | -2.57581233 | 0.012544673 | 0.041973985 |
| 230297_x_at | -0.2103124  | -4.280512   | 7.00E-05    | 0.000545389 |
| 230298_at   | -0.30676662 | -4.8350636  | 1.00E-05    | 0.000106998 |
| 230299_s_at | -0.02187877 | -0.55047498 | 0.584087264 | 0.739804873 |
| 230300_at   | -0.67696523 | -5.4818517  | 9.35E-07    | 1.51E-05    |
| 230301_at   | -0.08074949 | -1.99724204 | 0.050451865 | 0.128375925 |
| 230302_at   | -0.0129041  | -0.33787672 | 0.736664225 | 0.84704635  |
| 230303_at   | -1.31293992 | -6.12998292 | 8.05E-08    | 2.13E-06    |
| 230304_at   | 0.368392972 | 5.73547613  | 3.61E-07    | 6.95E-06    |
| 230305_at   | 0.050958564 | 1.144057311 | 0.257254351 | 0.43096227  |
| 230306_at   | -0.18984679 | -4.49215272 | 3.37E-05    | 0.000296193 |
| 230307_at   | 0.048716797 | 2.247852677 | 0.02836512  | 0.081424235 |
| 230308_at   | -0.12232476 | -3.17491288 | 0.002390151 | 0.010582698 |
| 230309_at   | 0.091207395 | 2.699203512 | 0.009069344 | 0.032248161 |
| 230310_at   | 0.003863844 | 0.095053022 | 0.924597192 | 0.960532258 |
| 230311_s_at | 0.04479565  | 1.9132482   | 0.060608745 | 0.148192377 |
| 230312_at   | -0.06832818 | -1.47398231 | 0.145841474 | 0.288315441 |
| 230313_at   | -0.04031581 | -0.90901854 | 0.367066039 | 0.550245534 |
| 230314_at   | 0.028881394 | 0.804162147 | 0.424555554 | 0.606005359 |
| 230315_at   | -0.07721861 | -1.9491462  | 0.056072502 | 0.139524095 |
| 230316_at   | 0.100412112 | 1.61990577  | 0.110625283 | 0.234883613 |
| 230317_x_at | 0.002040677 | 0.064414612 | 0.948859458 | 0.973763505 |
| 230318_at   | 0.016972803 | 0.467932897 | 0.641569277 | 0.782261531 |
| 230319_at   | 0.106775816 | 3.243805183 | 0.001950247 | 0.00892124  |
| 230320_at   | -0.39640701 | -6.27754364 | 4.57E-08    | 1.37E-06    |
| 230321_at   | -0.00519898 | -0.1919395  | 0.848453548 | 0.916758686 |
| 230322_at   | 0.046794385 | 1.683372488 | 0.097626799 | 0.213680243 |
| 230323_s_at | -0.02827264 | -1.05968661 | 0.293638049 | 0.472196017 |
| 230324_at   | 0.097837728 | 3.579222456 | 0.000700234 | 0.003796079 |
| 230325_at   | -0.02365732 | -0.78314849 | 0.43669542  | 0.61724886  |
| 230326_s_at | -0.21512267 | -3.57410997 | 0.000711541 | 0.003845246 |
| 230327_at   | -0.16157495 | -3.97612441 | 0.000194952 | 0.001289068 |
| 230328_at   | 0.040545912 | 1.109071131 | 0.271932999 | 0.447814201 |
| 230329_s_at | -0.03752929 | -0.76244136 | 0.448856552 | 0.628317631 |
| 230330_at   | -0.02766741 | -0.67490853 | 0.502389675 | 0.674582123 |
| 230331_at   | -0.02347688 | -0.75284047 | 0.454561335 | 0.633663606 |
| 230332_at   | 0.205275273 | 3.997689899 | 0.000181525 | 0.001215026 |
| 230333_at   | -0.06907514 | -0.58412426 | 0.561379967 | 0.722760738 |
| 230334_at   | -0.01951287 | -0.60082558 | 0.550274434 | 0.713208776 |
| 230335_at   | 0.044753485 | 1.219430016 | 0.227569385 | 0.395048784 |
| 230336_at   | -0.03469294 | -1.48694802 | 0.142392743 | 0.283428338 |
| 230337_at   | 0.260291868 | 3.821100629 | 0.00032382  | 0.001984393 |
| 230338_x_at | -0.06680576 | -2.07594105 | 0.042298742 | 0.11179936  |
| 230339_at   | -0.02353217 | -0.73200399 | 0.467085343 | 0.64438188  |
| 230340_s_at | 0.037008417 | 0.992866647 | 0.32485945  | 0.507085597 |
| 230341_x_at | -0.00364153 | -0.06226075 | 0.950567186 | 0.974686323 |
| 230342_at   | -0.05458672 | -1.29198308 | 0.201438051 | 0.36359731  |
| 230343_at   | -0.01595783 | -0.33747118 | 0.736968281 | 0.847162413 |
| 230344_x_at | 0.00221982  | 0.074461023 | 0.940897305 | 0.96917586  |
| 230345_at   | 0.028235356 | 0.84032798  | 0.404142131 | 0.586388348 |
| 230346_x_at | 0.001643239 | 0.04600894  | 0.963459649 | 0.981243759 |
| 230347_at   | -0.0105241  | -0.27086373 | 0.787448196 | 0.878695532 |
| 230348_at   | 0.056880491 | 2.016636815 | 0.04832625  | 0.124119827 |
| 230349_at   | -0.03068036 | -1.1139427  | 0.269854554 | 0.445507729 |
| 230350_at   | 0.031367425 | 1.047917433 | 0.29898209  | 0.478208703 |
| 230351_at   | 0.481454666 | 6.392063874 | 2.94E-08    | 9.82E-07    |
| 230352_at   | -0.33689284 | -5.33127123 | 1.64E-06    | 2.41E-05    |
| 230353_at   | 0.04483841  | 1.163416662 | 0.249378661 | 0.421804593 |
| 230354_at   | 0.004833542 | 0.146495203 | 0.884033577 | 0.937993605 |
| 230355_at   | -0.01446222 | -0.43205343 | 0.667289164 | 0.799637681 |
| 230356_at   | -0.08129623 | -2.57139031 | 0.01268917  | 0.042368651 |
| 230357_at   | -0.03311632 | -1.11315022 | 0.270191899 | 0.445841756 |
| 230358_at   | 0.013783061 | 0.369833651 | 0.712840448 | 0.831318177 |
| 230359_at   | 0.034167854 | 0.706286078 | 0.482810622 | 0.65793843  |
| 230360_at   | 0.111123508 | 0.585049334 | 0.560761942 | 0.722235525 |
| 230361_at   | -0.00855769 | -0.24815429 | 0.804883076 | 0.890061473 |
| 230362_at   | -0.03516403 | -0.97310602 | 0.334502727 | 0.517313943 |
| 230363_s_at | -0.01013594 | -0.45638744 | 0.649799438 | 0.787857368 |
| 230364_at   | 0.272456254 | 2.930269946 | 0.004821565 | 0.019144048 |
| 230365_at   | -0.01154043 | -0.37775186 | 0.70698054  | 0.827368464 |

|             |             |             |             |             |
|-------------|-------------|-------------|-------------|-------------|
| 230366_at   | 0.018684672 | 0.566239713 | 0.5733943   | 0.731397478 |
| 230367_at   | 0.063114392 | 1.868651141 | 0.066675272 | 0.159709039 |
| 230368_at   | 0.070033726 | 2.458411101 | 0.016932396 | 0.053776481 |
| 230369_at   | 0.157574532 | 3.388994418 | 0.001260292 | 0.006184799 |
| 230370_x_at | 0.070828365 | 1.49185086  | 0.1411055   | 0.2815832   |
| 230371_at   | 0.067538638 | 1.446533577 | 0.153358639 | 0.298931625 |
| 230372_at   | 0.006223857 | 0.169207762 | 0.866216304 | 0.927678203 |
| 230373_at   | 0.053276733 | 1.384963207 | 0.171316936 | 0.324221745 |
| 230374_at   | -0.0170933  | -0.39672297 | 0.693013706 | 0.817876589 |
| 230375_at   | 0.207886876 | 4.892232958 | 8.15E-06    | 9.00E-05    |
| 230376_at   | -0.03406454 | -1.01542659 | 0.314079183 | 0.495178568 |
| 230377_s_at | 0.045160292 | 1.046612368 | 0.299578759 | 0.478878066 |
| 230378_at   | -0.0322064  | -1.0026013  | 0.320177798 | 0.501942828 |
| 230379_x_at | 0.028966076 | 0.984998226 | 0.328676819 | 0.511178466 |
| 230380_at   | -0.06560485 | -2.04116672 | 0.045748715 | 0.119072946 |
| 230381_at   | -0.03022799 | -1.19616175 | 0.236453727 | 0.40574352  |
| 230382_at   | -0.04020134 | -1.05969083 | 0.293636144 | 0.472196017 |
| 230383_x_at | 0.014117798 | 0.364388839 | 0.716880046 | 0.834191762 |
| 230384_at   | 0.007779171 | 0.211665386 | 0.833102961 | 0.907657968 |
| 230385_at   | 0.172476478 | 4.559244937 | 2.67E-05    | 0.000243337 |
| 230386_at   | 0.113442331 | 3.114404457 | 0.002851781 | 0.012311805 |
| 230387_at   | 0.275385694 | 3.923683227 | 0.000231715 | 0.001496288 |
| 230388_s_at | 0.132006541 | 1.506219635 | 0.137385781 | 0.276205368 |
| 230389_at   | 0.409064156 | 5.953382746 | 1.58E-07    | 3.59E-06    |
| 230390_at   | -0.01943785 | -0.53485134 | 0.594777571 | 0.747813085 |
| 230391_at   | 0.030616644 | 0.603099357 | 0.548771115 | 0.711981972 |
| 230392_at   | 0.213836018 | 4.144708794 | 0.000111064 | 0.000804486 |
| 230393_at   | 0.032518116 | 0.537574302 | 0.59290783  | 0.746197987 |
| 230394_at   | -0.03396634 | -1.0893255  | 0.280472434 | 0.457674531 |
| 230395_at   | 0.134248281 | 3.247390805 | 0.00192958  | 0.008842078 |
| 230396_at   | -0.02296765 | -0.71476584 | 0.477593284 | 0.653259443 |
| 230397_at   | -0.05862309 | -1.47844453 | 0.144647245 | 0.286666665 |
| 230398_at   | -0.05659165 | -2.07923738 | 0.041983737 | 0.111137664 |
| 230399_at   | -0.06462921 | -1.84574058 | 0.069986311 | 0.16568642  |
| 230400_s_at | 0.029665965 | 0.730312356 | 0.468110667 | 0.645174077 |
| 230401_at   | -0.03952358 | -1.20651    | 0.232471939 | 0.400985101 |
| 230402_at   | 0.078122994 | 1.968149874 | 0.053790747 | 0.13509503  |
| 230403_at   | 0.270119522 | 3.603411759 | 0.000649021 | 0.003565588 |
| 230404_at   | 0.059897105 | 1.680252834 | 0.098235105 | 0.214666274 |
| 230405_at   | 0.19737856  | 5.393501587 | 1.30E-06    | 1.97E-05    |
| 230406_at   | 0.024156872 | 0.690395051 | 0.492672861 | 0.666440737 |
| 230407_at   | -0.09268702 | -1.52224528 | 0.133329097 | 0.27018881  |
| 230408_at   | 0.092302459 | 1.480885684 | 0.143997178 | 0.2857438   |
| 230409_at   | -0.07998268 | -1.73359509 | 0.088251969 | 0.198000468 |
| 230410_at   | 0.021114458 | 0.558975366 | 0.578309756 | 0.735217034 |
| 230411_at   | -0.55679707 | -6.98729467 | 2.94E-09    | 1.88E-07    |
| 230412_at   | 0.467097819 | 7.254166846 | 1.04E-09    | 9.60E-08    |
| 230413_s_at | -0.19520908 | -2.67895711 | 0.009571222 | 0.033668403 |
| 230414_s_at | 0.012242325 | 0.359288843 | 0.720671205 | 0.836599327 |
| 230415_at   | -0.04643666 | -1.12108256 | 0.266828586 | 0.442060471 |
| 230416_at   | -0.11751685 | -1.46236508 | 0.148986924 | 0.292828592 |
| 230417_at   | -0.04010119 | -0.64484947 | 0.521542784 | 0.690391289 |
| 230418_s_at | -0.04760026 | -0.74191985 | 0.461100961 | 0.639422906 |
| 230419_at   | 0.128925407 | 3.423435283 | 0.001134545 | 0.00565463  |
| 230420_at   | 0.026346015 | 0.78186259  | 0.437444904 | 0.617975966 |
| 230421_at   | 0.140748658 | 3.889119076 | 0.000259501 | 0.001644354 |
| 230422_at   | -0.01501893 | -0.39178525 | 0.696638879 | 0.820495235 |
| 230423_at   | 0.068597133 | 1.610046331 | 0.1127651   | 0.238310699 |
| 230424_at   | 0.156078337 | 3.555367391 | 0.000754497 | 0.004043162 |
| 230425_at   | -0.41384    | -4.34347489 | 5.64E-05    | 0.000456246 |
| 230426_at   | -0.3192022  | -5.01088314 | 5.31E-06    | 6.32E-05    |
| 230427_s_at | -0.06891932 | -1.50362791 | 0.138050921 | 0.277139092 |
| 230428_at   | 0.061701517 | 1.828891957 | 0.072508691 | 0.170115892 |
| 230429_at   | -0.03198568 | -1.07833843 | 0.285304134 | 0.463086833 |
| 230430_at   | 0.411739987 | 6.386930888 | 3.00E-08    | 9.95E-07    |
| 230431_at   | 0.030283404 | 0.901017831 | 0.371269189 | 0.55448788  |
| 230432_at   | 0.035523161 | 1.119345194 | 0.267562691 | 0.442803621 |
| 230433_at   | 0.111511315 | 2.322774993 | 0.023685686 | 0.070679087 |
| 230434_at   | 0.034299146 | 0.543608592 | 0.588774215 | 0.743298133 |
| 230435_at   | 0.140066422 | 2.631746923 | 0.010841613 | 0.037214543 |
| 230436_s_at | -0.04872613 | -1.3792592  | 0.173059212 | 0.326616246 |
| 230437_s_at | -0.21584734 | -5.38894484 | 1.32E-06    | 2.00E-05    |
| 230438_at   | -0.02884836 | -0.77063922 | 0.44401859  | 0.624241226 |
| 230439_at   | -0.05153896 | -1.34177656 | 0.184847791 | 0.342244751 |
| 230440_at   | 0.074115504 | 2.30606837  | 0.024665146 | 0.072905735 |

|             |              |             |             |             |
|-------------|--------------|-------------|-------------|-------------|
| 230441_at   | 0.130198251  | 2.727406561 | 0.008410349 | 0.030317415 |
| 230442_at   | -0.05337112  | -1.57313986 | 0.121073637 | 0.251243116 |
| 230443_at   | 0.028612348  | 0.668097145 | 0.506696086 | 0.678216663 |
| 230444_at   | 0.10214198   | 2.522213831 | 0.014400978 | 0.046961584 |
| 230445_at   | -0.02202365  | -0.67250314 | 0.50390818  | 0.675971437 |
| 230446_at   | 0.024573233  | 0.66157747  | 0.510836641 | 0.681624686 |
| 230447_at   | -0.58284026  | -5.80957409 | 2.73E-07    | 5.51E-06    |
| 230448_at   | 0.054594763  | 2.271562643 | 0.026802736 | 0.077839227 |
| 230449_x_at | -0.07820836  | -1.75658487 | 0.084215844 | 0.191035148 |
| 230450_at   | 0.129640872  | 3.878574431 | 0.000268598 | 0.001692158 |
| 230451_at   | -0.03230631  | -1.10637645 | 0.273087495 | 0.449053547 |
| 230452_at   | -0.03786433  | -1.08397538 | 0.282818049 | 0.460177822 |
| 230453_s_at | -0.1000606   | -3.06469012 | 0.003292221 | 0.013893855 |
| 230454_at   | -0.00300697  | -0.04580017 | 0.96362534  | 0.981323057 |
| 230455_at   | -0.0982361   | -2.82877234 | 0.006388159 | 0.024123331 |
| 230456_at   | 0.100857477  | 2.285573307 | 0.025915752 | 0.075856859 |
| 230457_at   | -0.04845448  | -1.39163374 | 0.169296562 | 0.321405291 |
| 230458_at   | -0.20627069  | -5.09976133 | 3.84E-06    | 4.85E-05    |
| 230459_s_at | -0.01553389  | -0.51259722 | 0.610161033 | 0.759189353 |
| 230460_at   | 0.064486206  | 1.898802078 | 0.062520348 | 0.151922543 |
| 230461_s_at | 0.128235264  | 2.507818891 | 0.014940178 | 0.048430146 |
| 230462_at   | -0.01970812  | -0.49868164 | 0.619871536 | 0.766703531 |
| 230463_at   | 0.009199214  | 0.327053628 | 0.744793407 | 0.852130241 |
| 230464_at   | 0.209240389  | 1.957973117 | 0.055002576 | 0.137483088 |
| 230465_at   | -0.05589091  | -2.09045511 | 0.040926953 | 0.108907852 |
| 230466_s_at | 0.217288457  | 3.008365866 | 0.003867663 | 0.015945904 |
| 230467_at   | -0.0045667   | -0.14737627 | 0.883341224 | 0.937615152 |
| 230468_s_at | -0.0018673   | -0.05907775 | 0.953091302 | 0.975875063 |
| 230469_at   | -0.01271054  | -0.61252206 | 0.542563489 | 0.707317176 |
| 230470_at   | 0.014065968  | 0.429800386 | 0.668918116 | 0.800559367 |
| 230471_at   | -0.02008554  | -0.49412915 | 0.623063268 | 0.768503162 |
| 230472_at   | 0.067294151  | 2.607124404 | 0.011563521 | 0.039273264 |
| 230473_s_at | 0.026217199  | 0.841258358 | 0.403625059 | 0.585961057 |
| 230474_at   | 0.041543364  | 0.988863998 | 0.326797624 | 0.5089667   |
| 230475_at   | -0.20475032  | -4.11031427 | 0.000124684 | 0.000889137 |
| 230476_at   | -0.03397957  | -0.97787276 | 0.33215938  | 0.514696173 |
| 230477_at   | 0.066972038  | 1.745886283 | 0.086074638 | 0.19431468  |
| 230478_at   | -0.071159574 | -1.80653167 | 0.07597369  | 0.176330295 |
| 230479_at   | 0.012929892  | 0.237394782 | 0.81317903  | 0.895093769 |
| 230480_at   | -0.03529048  | -1.1351002  | 0.260957553 | 0.435257135 |
| 230481_at   | -0.01973833  | -0.50052896 | 0.618578471 | 0.765838652 |
| 230482_at   | -0.27506814  | -5.04103186 | 4.76E-06    | 5.79E-05    |
| 230483_at   | -0.09716682  | -2.73086905 | 0.008332544 | 0.03007701  |
| 230484_at   | 0.004982134  | 0.151175239 | 0.880357    | 0.935914628 |
| 230485_at   | 0.007546423  | 0.231294942 | 0.817891852 | 0.898298624 |
| 230486_at   | -0.05904327  | -1.57038584 | 0.121712839 | 0.252206518 |
| 230487_at   | 0.03122654   | 0.758760527 | 0.451038736 | 0.630385064 |
| 230488_s_at | 0.003097816  | 0.089891722 | 0.928679977 | 0.962781914 |
| 230489_at   | -0.02172388  | -0.75839447 | 0.451256092 | 0.630590247 |
| 230490_x_at | 0.149323229  | 5.02928464  | 4.96E-06    | 5.99E-05    |
| 230491_at   | 0.051430164  | 1.369729139 | 0.176000417 | 0.330591897 |
| 230492_s_at | -0.12889826  | -2.7309467  | 0.008330807 | 0.030074348 |
| 230493_at   | -0.2750649   | -2.86260543 | 0.005820106 | 0.02233106  |
| 230494_at   | 0.11906387   | 1.601621966 | 0.11461986  | 0.241266135 |
| 230495_at   | -0.15930717  | -2.67718255 | 0.0096164   | 0.033803378 |
| 230496_at   | 0.473655695  | 5.632806378 | 5.31E-07    | 9.52E-06    |
| 230497_at   | -0.97040688  | -5.93751339 | 1.68E-07    | 3.78E-06    |
| 230498_at   | -0.02548425  | -0.53460826 | 0.594944617 | 0.747876827 |
| 230499_at   | 0.010604185  | 0.273631425 | 0.785330591 | 0.877537623 |
| 230500_at   | -0.00731864  | -0.16737037 | 0.867655218 | 0.928351616 |
| 230501_at   | 0.002137364  | 0.052127457 | 0.958604529 | 0.978902041 |
| 230502_s_at | -0.0388797   | -0.48296576 | 0.630920586 | 0.77454236  |
| 230503_at   | 0.187675109  | 2.961473752 | 0.004416847 | 0.017810857 |
| 230504_at   | -0.03854533  | -1.22688636 | 0.224774666 | 0.391993966 |
| 230505_at   | -0.1039207   | -2.52672947 | 0.014235497 | 0.046494544 |
| 230506_at   | 0.018923881  | 0.652807811 | 0.516434611 | 0.686245521 |
| 230507_at   | -0.01577225  | -0.37443791 | 0.709430903 | 0.829128816 |
| 230508_at   | -0.30795424  | -6.14819479 | 7.51E-08    | 2.02E-06    |
| 230509_at   | 0.138612436  | 3.569989278 | 0.00072078  | 0.003888595 |
| 230510_at   | -0.00769506  | -0.20201318 | 0.840606497 | 0.912319036 |
| 230511_at   | -0.08557807  | -2.2797893  | 0.026278721 | 0.076711208 |
| 230512_x_at | 0.012980764  | 0.396990615 | 0.692817409 | 0.817731299 |
| 230513_at   | -0.01753832  | -0.56788127 | 0.572286355 | 0.730551893 |
| 230514_s_at | 0.021507437  | 0.582272074 | 0.562618397 | 0.723500644 |
| 230515_at   | 0.030907934  | 0.714852471 | 0.477540144 | 0.653226742 |

|             |              |             |             |             |
|-------------|--------------|-------------|-------------|-------------|
| 230516_at   | 0.14709427   | 3.492940398 | 0.000916085 | 0.004739733 |
| 230517_at   | -0.03531789  | -1.17291335 | 0.24557908  | 0.416951724 |
| 230518_at   | 0.016544816  | 0.58135629  | 0.563231218 | 0.724020798 |
| 230519_at   | 0.239712151  | 3.677429978 | 0.000513581 | 0.002930666 |
| 230520_at   | 0.0567440645 | 1.991117718 | 0.051139557 | 0.129741661 |
| 230521_at   | 0.018306529  | 0.632665638 | 0.529414506 | 0.696965744 |
| 230522_s_at | -0.06409834  | -1.66802716 | 0.100649003 | 0.218635425 |
| 230523_at   | -0.08066364  | -2.133793   | 0.037058531 | 0.100657584 |
| 230524_at   | -0.08137304  | -2.49887598 | 0.015284278 | 0.049398901 |
| 230525_at   | -0.04795029  | -1.05514858 | 0.295690801 | 0.474643103 |
| 230526_at   | 0.266371061  | 5.445609842 | 1.07E-06    | 1.69E-05    |
| 230527_at   | 0.011112838  | 0.360658374 | 0.719652447 | 0.835838525 |
| 230528_s_at | 0.144172623  | 2.343566095 | 0.022515198 | 0.067765455 |
| 230529_at   | 0.1066866336 | 3.129110793 | 0.002732465 | 0.011874692 |
| 230530_at   | 0.013637236  | 0.378787257 | 0.706215593 | 0.826778492 |
| 230531_at   | -0.21763454  | -3.49261584 | 0.000917005 | 0.004742828 |
| 230532_at   | 0.022412664  | 0.515403174 | 0.608211417 | 0.757670439 |
| 230533_at   | 0.033837297  | 1.071221305 | 0.288464615 | 0.466647141 |
| 230534_at   | 0.151855816  | 4.26224839  | 7.46E-05    | 0.000576374 |
| 230535_s_at | 0.20789616   | 2.66688476  | 0.009882438 | 0.034548018 |
| 230536_at   | 0.103504073  | 3.221410112 | 0.002084121 | 0.009434167 |
| 230537_at   | -0.05779473  | -1.41430725 | 0.162566096 | 0.311940404 |
| 230538_at   | 0.396138406  | 4.573456033 | 2.54E-05    | 0.000233357 |
| 230539_at   | 0.041664461  | 0.815707526 | 0.41797262  | 0.600412456 |
| 230540_at   | -0.0188232   | -0.59313319 | 0.555375684 | 0.717697492 |
| 230541_at   | -0.02991426  | -0.92381916 | 0.359371126 | 0.542491872 |
| 230542_at   | -0.02624324  | -0.71063422 | 0.480131383 | 0.655480052 |
| 230543_at   | -0.07023864  | -1.697858   | 0.094842579 | 0.209070954 |
| 230544_at   | 0.013222953  | 0.369243308 | 0.713278037 | 0.831667676 |
| 230545_at   | -0.01067703  | -0.36137094 | 0.719122592 | 0.835648124 |
| 230546_at   | -0.0381267   | -1.54715574 | 0.127212783 | 0.260990677 |
| 230547_at   | -0.36316221  | -4.33167474 | 5.88E-05    | 0.000471281 |
| 230548_at   | -0.00310504  | -0.08472774 | 0.932766814 | 0.965100847 |
| 230549_at   | 0.017815824  | 0.436470425 | 0.664100342 | 0.797398578 |
| 230550_at   | 0.093829964  | 1.960566642 | 0.054691548 | 0.136903476 |
| 230551_at   | -0.51769748  | -5.09723011 | 3.87E-06    | 4.89E-05    |
| 230552_at   | -0.12178862  | -1.9322341  | 0.058172156 | 0.143462643 |
| 230553_at   | 0.033630625  | 0.949368504 | 0.346334481 | 0.529374487 |
| 230554_at   | -0.03711571  | -1.07252427 | 0.287884206 | 0.466062484 |
| 230555_s_at | -0.01858031  | -0.52870085 | 0.599010989 | 0.75087648  |
| 230556_at   | -0.0421736   | -1.29143106 | 0.201628027 | 0.363869872 |
| 230557_at   | -0.07008747  | -2.05234574 | 0.044614016 | 0.116724598 |
| 230558_at   | 0.034143906  | 1.189608207 | 0.239000846 | 0.408709652 |
| 230559_x_at | 0.21305038   | 3.792780613 | 0.00035489  | 0.00214132  |
| 230560_at   | -0.46838094  | -4.06618739 | 0.000144536 | 0.001003044 |
| 230561_s_at | 0.166660503  | 2.71397458  | 0.008718523 | 0.031199313 |
| 230562_at   | -0.06150257  | -2.09453616 | 0.040548267 | 0.108022363 |
| 230563_at   | -0.27053662  | -2.95901305 | 0.004447578 | 0.017916997 |
| 230564_at   | -0.05985894  | -1.64371547 | 0.105593284 | 0.226796187 |
| 230565_at   | -0.03008709  | -0.84434252 | 0.401913898 | 0.584255007 |
| 230566_at   | -0.08227013  | -2.56240821 | 0.012987336 | 0.043164276 |
| 230567_at   | -0.02281799  | -0.79206056 | 0.431521929 | 0.612378089 |
| 230568_x_at | -0.03934785  | -1.18587719 | 0.240459793 | 0.410474355 |
| 230569_at   | 0.028570644  | 1.025173751 | 0.309497011 | 0.490042331 |
| 230570_at   | -0.09018482  | -1.07357012 | 0.287418918 | 0.465562186 |
| 230571_at   | -0.04506178  | -1.05352171 | 0.2964291   | 0.475435469 |
| 230572_at   | -0.03887161  | -0.99773277 | 0.322513519 | 0.504454351 |
| 230573_at   | 0.052781691  | 1.133354686 | 0.261683594 | 0.436110049 |
| 230574_at   | -0.0659297   | -1.65537627 | 0.103197686 | 0.222871895 |
| 230575_at   | -0.0656286   | -2.66223893 | 0.010004648 | 0.034920941 |
| 230576_at   | 0.006515431  | 0.151217296 | 0.880323973 | 0.935901779 |
| 230577_at   | 0.672230278  | 5.956957462 | 1.56E-07    | 3.55E-06    |
| 230578_at   | 0.244009643  | 4.656260268 | 1.89E-05    | 0.000182446 |
| 230579_at   | 0.018717339  | 0.547748977 | 0.585945882 | 0.741053529 |
| 230580_at   | -0.04289344  | -1.21025608 | 0.231042624 | 0.399213028 |
| 230581_at   | -0.22103678  | -3.96110446 | 0.000204864 | 0.001343279 |
| 230582_at   | 0.019987779  | 0.762637738 | 0.448740301 | 0.628272972 |
| 230583_s_at | 0.028815332  | 0.719520014 | 0.474682078 | 0.650651478 |
| 230584_at   | 0.033447349  | 1.235773195 | 0.221476741 | 0.388486145 |
| 230585_at   | -0.00939894  | -0.27806516 | 0.78194167  | 0.875346697 |
| 230586_s_at | -0.07367499  | -1.67957575 | 0.098367541 | 0.214870094 |
| 230587_at   | 0.073032824  | 2.011512803 | 0.048880193 | 0.125232376 |
| 230588_s_at | 0.093272652  | 1.764500779 | 0.082862069 | 0.188586423 |
| 230589_at   | 0.158700937  | 3.236522215 | 0.001992869 | 0.009087003 |
| 230590_at   | 0.159935579  | 4.423783704 | 4.28E-05    | 0.000361699 |

|             |             |             |             |             |
|-------------|-------------|-------------|-------------|-------------|
| 230591_at   | -0.07913386 | -1.58394982 | 0.118590665 | 0.247446201 |
| 230592_at   | 0.077108751 | 1.853971965 | 0.068781114 | 0.163520552 |
| 230593_at   | -0.11438488 | -3.57819294 | 0.000702497 | 0.003806039 |
| 230594_at   | -0.11166956 | -2.54869104 | 0.013454965 | 0.044442032 |
| 230595_at   | 0.011505291 | 0.275330423 | 0.784031467 | 0.876699718 |
| 230596_at   | -0.51220478 | -6.08618891 | 9.52E-08    | 2.43E-06    |
| 230597_at   | 0.004489104 | 0.109520147 | 0.91316435  | 0.953977118 |
| 230598_at   | -0.07203105 | -1.49555749 | 0.140138427 | 0.280251771 |
| 230599_at   | 0.834203978 | 6.138560104 | 7.79E-08    | 2.08E-06    |
| 230600_at   | 0.192244507 | 2.969606287 | 0.00431668  | 0.017479483 |
| 230601_s_at | 0.299589483 | 2.443548196 | 0.017576842 | 0.05547237  |
| 230602_at   | -0.00594703 | -0.13695761 | 0.891534043 | 0.941904388 |
| 230603_at   | -0.03206827 | -0.67225988 | 0.504061889 | 0.676096457 |
| 230604_at   | 0.011500126 | 0.371957936 | 0.711266635 | 0.830362271 |
| 230605_at   | 0.158399946 | 4.028587882 | 0.000163831 | 0.001113263 |
| 230606_at   | -0.06613672 | -1.92536805 | 0.059043513 | 0.145123064 |
| 230607_at   | 0.096320334 | 2.06301413  | 0.043553939 | 0.114480541 |
| 230608_at   | -0.03462791 | -0.88111432 | 0.381857685 | 0.564594027 |
| 230609_at   | -0.00224893 | -0.0656613  | 0.947871111 | 0.973352688 |
| 230610_at   | 0.039270186 | 1.387545992 | 0.170532474 | 0.323161353 |
| 230611_at   | -0.02400946 | -0.63718246 | 0.526489065 | 0.694772176 |
| 230612_at   | 0.096825333 | 2.481659114 | 0.015966957 | 0.051216193 |
| 230613_at   | 0.07317569  | 2.045767356 | 0.045278753 | 0.118060929 |
| 230614_at   | -0.01794634 | -0.533625   | 0.595620549 | 0.748473881 |
| 230615_at   | -0.01146272 | -0.22602731 | 0.821967146 | 0.901016794 |
| 230616_at   | -0.05372948 | -1.59209869 | 0.116746133 | 0.244579674 |
| 230617_at   | -0.04630451 | -1.39656998 | 0.167813308 | 0.319496658 |
| 230618_s_at | -0.05701268 | -1.02001204 | 0.311917875 | 0.492901268 |
| 230619_at   | 0.24401907  | 5.192336102 | 2.73E-06    | 3.66E-05    |
| 230620_at   | -0.04169118 | -1.01104412 | 0.316154237 | 0.497362285 |
| 230621_at   | 0.065820405 | 0.926658481 | 0.357906917 | 0.540932182 |
| 230622_at   | 0.103856232 | 3.032562656 | 0.00360983  | 0.015022861 |
| 230623_x_at | -0.00471287 | -0.15752044 | 0.875376531 | 0.93308357  |
| 230624_at   | -0.49211209 | -4.64202498 | 1.99E-05    | 0.000190368 |
| 230625_s_at | 0.019727603 | 0.637829442 | 0.526070726 | 0.694445678 |
| 230626_at   | -0.02490785 | -0.57543006 | 0.567204873 | 0.726930494 |
| 230627_at   | -0.01325598 | -0.35579176 | 0.723274898 | 0.838176639 |
| 230628_at   | 0.005658182 | 0.190885072 | 0.849275816 | 0.917295055 |
| 230629_s_at | 0.170087189 | 3.897215472 | 0.000252719 | 0.00160703  |
| 230630_at   | 0.198227223 | 3.216834161 | 0.002112518 | 0.009545311 |
| 230631_s_at | -0.03160192 | -1.08993292 | 0.280206986 | 0.457411448 |
| 230632_at   | -0.06902983 | -1.38786888 | 0.170434599 | 0.323044365 |
| 230633_at   | 0.020344635 | 0.551564767 | 0.583345023 | 0.739095531 |
| 230634_x_at | 0.051540529 | 1.430897698 | 0.157773918 | 0.305089648 |
| 230635_at   | -0.03099262 | -0.72824802 | 0.469363623 | 0.646115907 |
| 230636_s_at | 0.04709624  | 1.081000913 | 0.284128005 | 0.461597646 |
| 230637_at   | 0.037362692 | 1.144782922 | 0.256956002 | 0.430656179 |
| 230638_at   | -0.0061122  | -0.17990314 | 0.857849627 | 0.922475772 |
| 230639_at   | -0.0251266  | -0.82425068 | 0.413141423 | 0.595424588 |
| 230640_at   | 0.206348472 | 4.21152599  | 8.86E-05    | 0.000665169 |
| 230641_at   | -0.20264742 | -3.55168999 | 0.00076321  | 0.00407763  |
| 230642_at   | -0.02837164 | -0.87992351 | 0.382497153 | 0.565184248 |
| 230643_at   | 0.023289551 | 0.72435175  | 0.471733648 | 0.648041073 |
| 230644_at   | -0.25454784 | -3.8370691  | 0.00030747  | 0.00190167  |
| 230645_at   | 0.263629278 | 3.537586617 | 0.000797522 | 0.004219713 |
| 230646_at   | 0.000476319 | 0.01022018  | 0.991880353 | 0.996241285 |
| 230647_at   | 0.00928264  | 0.274530498 | 0.784643046 | 0.877138256 |
| 230648_at   | 0.051593351 | 2.067852874 | 0.04308037  | 0.113462661 |
| 230649_at   | -0.10889045 | -2.68141887 | 0.009508871 | 0.033491249 |
| 230650_at   | -0.13356022 | -4.35827924 | 5.36E-05    | 0.000437293 |
| 230651_at   | 0.3356115   | 5.514335365 | 8.28E-07    | 1.37E-05    |
| 230652_at   | -0.08502578 | -1.73506015 | 0.087990073 | 0.1976504   |
| 230653_at   | 0.567607979 | 5.27418872  | 2.02E-06    | 2.86E-05    |
| 230654_at   | -0.15882613 | -3.82028321 | 0.000324679 | 0.001988902 |
| 230655_at   | -0.01022696 | -0.34933874 | 0.728087998 | 0.841297606 |
| 230656_s_at | -0.36955541 | -5.76351903 | 3.25E-07    | 6.38E-06    |
| 230657_at   | 0.096023274 | 1.596424077 | 0.115776491 | 0.243049601 |
| 230658_at   | -0.00172796 | -0.05228187 | 0.958482019 | 0.978828654 |
| 230659_at   | -0.0788331  | -2.4459905  | 0.017469454 | 0.055195817 |
| 230660_at   | -0.39772833 | -5.97446841 | 1.46E-07    | 3.37E-06    |
| 230661_at   | 0.022865262 | 0.804464462 | 0.424382391 | 0.605900323 |
| 230662_at   | 0.011895559 | 0.333486439 | 0.739958163 | 0.849129827 |
| 230663_at   | 0.352778775 | 5.788596483 | 2.95E-07    | 5.90E-06    |
| 230664_at   | -0.03129778 | -0.96524179 | 0.338392637 | 0.521120696 |
| 230665_at   | -0.32101153 | -5.9761219  | 1.45E-07    | 3.36E-06    |



|             |             |             |             |             |
|-------------|-------------|-------------|-------------|-------------|
| 230666_at   | 0.052297375 | 1.18841919  | 0.239465093 | 0.409354878 |
| 230667_at   | -0.06180338 | -1.23031613 | 0.22349763  | 0.390620472 |
| 230668_at   | -0.04623906 | -1.01564069 | 0.313978045 | 0.495054041 |
| 230669_at   | 0.219965346 | 4.343135113 | 5.65E-05    | 0.000456532 |
| 230670_at   | 0.027098695 | 0.814396151 | 0.41871722  | 0.601134394 |
| 230671_at   | -0.09305476 | -2.62769572 | 0.010957493 | 0.037534475 |
| 230672_at   | -0.02106136 | -0.60722771 | 0.546046953 | 0.710097781 |
| 230673_at   | -0.07786801 | -2.07181285 | 0.042696133 | 0.112616596 |
| 230674_at   | 0.029104187 | 0.765764505 | 0.446891711 | 0.626758114 |
| 230675_at   | 0.040545955 | 0.932566819 | 0.354872414 | 0.538008682 |
| 230676_s_at | 0.043531725 | 1.328106952 | 0.189295489 | 0.347847293 |
| 230677_at   | 0.032399063 | 0.835201928 | 0.406998298 | 0.589336412 |
| 230678_at   | 0.063799013 | 1.604847801 | 0.113906752 | 0.240071707 |
| 230679_at   | -0.04853917 | -1.76860008 | 0.082168148 | 0.187341031 |
| 230680_at   | -0.74373794 | -5.89309886 | 1.99E-07    | 4.32E-06    |
| 230681_at   | -0.13015958 | -1.86834116 | 0.066719172 | 0.15977994  |
| 230682_x_at | 0.042937784 | 1.155176261 | 0.252709606 | 0.425710431 |
| 230683_at   | 0.102648319 | 3.080799128 | 0.003142981 | 0.01335737  |
| 230684_at   | -0.10675052 | -2.3839677  | 0.020387208 | 0.062544283 |
| 230685_at   | -0.07825495 | -2.49004688 | 0.015631004 | 0.050319156 |
| 230686_s_at | 0.00421069  | 0.094554636 | 0.924991347 | 0.960696086 |
| 230687_at   | 0.014601885 | 0.431819141 | 0.66745848  | 0.799734016 |
| 230688_at   | 0.030117855 | 0.479499649 | 0.633368988 | 0.776365903 |
| 230689_at   | -0.02084143 | -0.60589595 | 0.54692499  | 0.710647707 |
| 230690_at   | -0.02180757 | -0.63760269 | 0.526217325 | 0.694536625 |
| 230691_at   | -0.41717378 | -5.96690829 | 1.50E-07    | 3.45E-06    |
| 230692_at   | -0.28606427 | -4.57225579 | 2.55E-05    | 0.000234247 |
| 230693_at   | -0.02245266 | -0.47617584 | 0.635720748 | 0.777931978 |
| 230694_at   | -0.02421327 | -0.47614774 | 0.635740648 | 0.777935029 |
| 230695_s_at | 0.20671955  | 2.717395934 | 0.008639058 | 0.030987    |
| 230696_at   | -0.03841931 | -0.80999491 | 0.421222098 | 0.603214157 |
| 230697_at   | -0.09766895 | -1.51358701 | 0.13550886  | 0.27342723  |
| 230698_at   | -1.02200818 | -7.52468886 | 3.64E-10    | 4.76E-08    |
| 230699_at   | -0.03647917 | -0.90032947 | 0.371632241 | 0.554853614 |
| 230700_at   | -0.13459249 | -3.11027598 | 0.002886143 | 0.012420561 |
| 230701_x_at | 0.032043348 | 0.869621135 | 0.388057652 | 0.570739876 |
| 230702_at   | -0.05281515 | -1.72617996 | 0.089587418 | 0.200322253 |
| 230703_at   | 0.091887571 | 1.72775037  | 0.089303206 | 0.199815668 |
| 230704_s_at | 0.014745261 | 0.387719085 | 0.699629526 | 0.822405123 |
| 230705_at   | 0.05354992  | 1.749540922 | 0.085435886 | 0.193165408 |
| 230706_s_at | -0.0850799  | -1.37486393 | 0.17441098  | 0.328494699 |
| 230707_at   | 0.262365532 | 5.282125435 | 1.96E-06    | 2.79E-05    |
| 230708_at   | -0.07978724 | -1.98818501 | 0.051471708 | 0.130451036 |
| 230709_x_at | -0.02741214 | -0.97562564 | 0.333262712 | 0.515976482 |
| 230710_at   | -0.00711171 | -0.16429467 | 0.870064891 | 0.929869122 |
| 230711_at   | 0.062452648 | 1.886364124 | 0.064206962 | 0.155152071 |
| 230712_at   | 0.227286481 | 2.694076446 | 0.009194106 | 0.032619115 |
| 230713_at   | 0.186624039 | 3.837585696 | 0.000306955 | 0.001899533 |
| 230714_s_at | 0.041272584 | 0.888828142 | 0.377731637 | 0.560291344 |
| 230715_at   | -0.08072175 | -1.91549466 | 0.060315989 | 0.147690234 |
| 230716_at   | 0.007254544 | 0.238726715 | 0.812150877 | 0.894578966 |
| 230717_at   | 0.246171456 | 4.989133357 | 5.74E-06    | 6.73E-05    |
| 230718_at   | -0.06955392 | -1.58386024 | 0.118611072 | 0.247450532 |
| 230719_at   | -0.01047611 | -0.3622487  | 0.718470085 | 0.835241466 |
| 230720_at   | 0.508471416 | 4.798814906 | 1.14E-05    | 0.00011897  |
| 230721_at   | -0.04548626 | -1.48401947 | 0.143166035 | 0.28449873  |
| 230722_at   | 0.086503712 | 2.131924927 | 0.037218451 | 0.100993746 |
| 230723_at   | -0.00937474 | -0.18958937 | 0.85028647  | 0.917790082 |
| 230724_s_at | 0.027179974 | 0.738661094 | 0.463062809 | 0.640996192 |
| 230725_at   | -0.03170073 | -0.89807761 | 0.372821491 | 0.555923465 |
| 230726_at   | 0.017943641 | 0.476809936 | 0.635271801 | 0.777574215 |
| 230727_at   | -0.07430627 | -1.65797082 | 0.102670732 | 0.222053295 |
| 230728_at   | 0.126494409 | 3.732944019 | 0.000430204 | 0.002520537 |
| 230729_at   | -0.11445735 | -2.01172065 | 0.048857617 | 0.125191    |
| 230730_at   | -0.0200434  | -0.55960084 | 0.577885726 | 0.734886257 |
| 230731_x_at | -0.13671676 | -3.41110811 | 0.00117812  | 0.005844438 |
| 230732_s_at | -0.06140718 | -1.85467403 | 0.068679135 | 0.163367919 |
| 230733_at   | 0.134681693 | 2.732533661 | 0.008295375 | 0.029973069 |
| 230734_x_at | -0.41059673 | -3.67238773 | 0.000521877 | 0.002971552 |
| 230735_at   | 0.118140075 | 2.203689456 | 0.031490953 | 0.088526459 |
| 230736_at   | -0.05287042 | -1.49184656 | 0.141106626 | 0.2815832   |
| 230737_s_at | 0.039267972 | 1.076388813 | 0.286167495 | 0.464094763 |
| 230738_at   | 0.038368315 | 1.034149593 | 0.3053177   | 0.485302793 |
| 230739_at   | -0.00775343 | -0.31227889 | 0.755937732 | 0.859609413 |
| 230740_at   | -0.03662326 | -1.56104495 | 0.123901022 | 0.255740456 |

|             |             |             |             |             |
|-------------|-------------|-------------|-------------|-------------|
| 230741_at   | 0.567773309 | 4.37304892  | 5.10E-05    | 0.000418484 |
| 230742_at   | 0.150654062 | 2.5275952   | 0.014203968 | 0.046413961 |
| 230743_at   | -0.03281831 | -0.8146641  | 0.418565011 | 0.601050911 |
| 230744_at   | 0.055604373 | 1.673939173 | 0.099475717 | 0.216790074 |
| 230745_s_at | -0.0086483  | -0.27150226 | 0.786959505 | 0.87841427  |
| 230746_s_at | -0.04998642 | -0.79651046 | 0.428952438 | 0.610029508 |
| 230747_s_at | -0.00626694 | -0.27654368 | 0.783104135 | 0.876043041 |
| 230748_at   | 0.016285589 | 0.155697737 | 0.876806694 | 0.933984287 |
| 230749_s_at | 0.069702131 | 1.451241518 | 0.152048255 | 0.297092505 |
| 230750_at   | 0.030596969 | 0.775668229 | 0.441065901 | 0.621382507 |
| 230751_at   | -0.03777119 | -1.42357029 | 0.159876747 | 0.308200056 |
| 230752_at   | 0.01918217  | 0.608331703 | 0.545319635 | 0.709420304 |
| 230753_at   | 0.038599215 | 1.154664346 | 0.252917578 | 0.42590024  |
| 230754_at   | -0.01621284 | -0.52378406 | 0.602405292 | 0.753419637 |
| 230755_at   | -0.11685124 | -3.54957882 | 0.000768255 | 0.004099462 |
| 230756_at   | 0.028153699 | 0.747012358 | 0.458044708 | 0.63669083  |
| 230757_at   | 0.032907958 | 0.825929073 | 0.412196285 | 0.59447318  |
| 230758_at   | 0.207618063 | 3.253625126 | 0.001894136 | 0.008712714 |
| 230759_at   | 0.035558097 | 0.686908013 | 0.494851705 | 0.66831598  |
| 230760_at   | 0.052510005 | 1.083281574 | 0.283123225 | 0.460506721 |
| 230761_at   | 0.03221375  | 1.012815031 | 0.31531462  | 0.496583466 |
| 230762_at   | -0.006816   | -0.24060285 | 0.810703204 | 0.893755337 |
| 230763_at   | 0.324266984 | 2.520905151 | 0.01444926  | 0.047091544 |
| 230764_at   | -0.00215379 | -0.06380423 | 0.949343385 | 0.974036469 |
| 230765_at   | -0.05257545 | -1.31349607 | 0.194138412 | 0.354140159 |
| 230766_at   | 0.039844141 | 1.094214726 | 0.27834077  | 0.455113076 |
| 230767_at   | -0.20843961 | -4.85115063 | 9.45E-06    | 0.000101966 |
| 230768_at   | -0.00249089 | -0.07928176 | 0.937078788 | 0.96732401  |
| 230769_at   | 0.043925366 | 1.285249523 | 0.203764522 | 0.366703882 |
| 230770_at   | 0.029506004 | 0.989711498 | 0.326386604 | 0.508572279 |
| 230771_at   | 0.081289628 | 1.804021581 | 0.076371172 | 0.177032179 |
| 230772_at   | -0.01527059 | -0.4547228  | 0.650989733 | 0.788435105 |
| 230773_at   | -0.3054302  | -6.70117619 | 8.92E-09    | 4.12E-07    |
| 230774_at   | 0.207983074 | 2.704311589 | 0.008946588 | 0.031872532 |
| 230775_s_at | 0.054493886 | 1.791745434 | 0.078340283 | 0.180622365 |
| 230776_at   | 0.134969413 | 2.13896762  | 0.036618679 | 0.099741712 |
| 230777_s_at | 0.087393802 | 2.987705606 | 0.004101288 | 0.016743352 |
| 230778_at   | -0.02979507 | -1.19509638 | 0.236866453 | 0.406217786 |
| 230779_at   | 0.265526217 | 3.3916644   | 0.00125009  | 0.006144178 |
| 230780_at   | -0.01931684 | -0.68445638 | 0.496386745 | 0.669498926 |
| 230781_at   | 0.773987421 | 3.947245563 | 0.000214439 | 0.001398469 |
| 230782_at   | 0.018433131 | 0.507426639 | 0.613761056 | 0.76197142  |
| 230783_at   | -0.02840411 | -0.41501441 | 0.679647783 | 0.808127799 |
| 230784_at   | 0.072622122 | 2.135555654 | 0.036908187 | 0.10035901  |
| 230785_at   | 0.223358066 | 3.552197819 | 0.000762001 | 0.004071658 |
| 230786_at   | -0.0188258  | -0.67243037 | 0.50395416  | 0.675992536 |
| 230787_at   | -0.01173205 | -0.29180751 | 0.771464946 | 0.869171911 |
| 230788_at   | 0.088357243 | 2.704695578 | 0.008937422 | 0.031847493 |
| 230789_at   | -0.16639384 | -3.1087873  | 0.002898629 | 0.012465268 |
| 230790_x_at | -0.02249505 | -0.6926588  | 0.491261204 | 0.66542223  |
| 230791_at   | 0.626651408 | 6.324843264 | 3.81E-08    | 1.20E-06    |
| 230792_at   | -0.01961099 | -0.68594836 | 0.49545226  | 0.668597288 |
| 230793_at   | -0.19174362 | -1.83156375 | 0.072103679 | 0.169495641 |
| 230794_at   | -0.05865196 | -1.04561766 | 0.300034079 | 0.479342355 |
| 230795_at   | 0.055313055 | 0.961726307 | 0.340141111 | 0.522984809 |
| 230796_at   | -0.02992368 | -0.78246039 | 0.437096382 | 0.617639797 |
| 230797_s_at | -0.03342556 | -0.99552078 | 0.323578497 | 0.505652086 |
| 230798_at   | -0.0437601  | -1.0701109  | 0.288959886 | 0.467211578 |
| 230799_at   | -0.14098162 | -3.57320112 | 0.000713569 | 0.00385574  |
| 230800_at   | -0.00865345 | -0.24803621 | 0.804974005 | 0.890095953 |
| 230801_at   | -0.00104587 | -0.03017237 | 0.976032169 | 0.987986585 |
| 230802_at   | 0.008366598 | 0.27893653  | 0.781276138 | 0.874997949 |
| 230803_s_at | 0.006871479 | 0.185620379 | 0.853383853 | 0.919620745 |
| 230804_at   | -0.00811371 | -0.3049353  | 0.761496481 | 0.862660027 |
| 230805_at   | 0.055683821 | 1.312416908 | 0.194499776 | 0.354582255 |
| 230806_s_at | -0.25516267 | -5.60647818 | 5.87E-07    | 1.03E-05    |
| 230807_at   | 0.217315964 | 3.503317284 | 0.000887119 | 0.004613348 |
| 230808_at   | 0.058135558 | 1.831543211 | 0.072106786 | 0.169495641 |
| 230809_at   | 0.066583472 | 2.418106463 | 0.018731316 | 0.058410546 |
| 230810_at   | -0.05052756 | -1.24084677 | 0.219609947 | 0.386516274 |
| 230811_at   | 0.038748986 | 0.667833045 | 0.506863461 | 0.678314792 |
| 230812_at   | -0.01741587 | -0.47314367 | 0.637869449 | 0.779536817 |
| 230813_at   | 0.001453779 | 0.030123288 | 0.976071147 | 0.987986585 |
| 230814_at   | 0.049525302 | 1.344889306 | 0.183846167 | 0.341002403 |
| 230815_at   | 0.454042464 | 5.819146547 | 2.63E-07    | 5.37E-06    |

|             |             |             |             |             |
|-------------|-------------|-------------|-------------|-------------|
| 230816_at   | -0.14879714 | -3.27845066 | 0.001758989 | 0.008187961 |
| 230817_at   | 0.021556148 | 0.774853758 | 0.441543318 | 0.621878671 |
| 230818_at   | 0.165537493 | 3.033234424 | 0.003602906 | 0.014996839 |
| 230819_at   | -0.00996201 | -0.41291059 | 0.681179941 | 0.809296167 |
| 230820_at   | 0.111942581 | 1.80528468  | 0.076170938 | 0.176641323 |
| 230821_at   | -0.09068708 | -1.90833368 | 0.061253414 | 0.149437705 |
| 230822_at   | -0.05429751 | -1.53162828 | 0.13099841  | 0.266735657 |
| 230823_at   | -0.08174259 | -1.745932   | 0.086066623 | 0.1943064   |
| 230824_at   | -0.01072774 | -0.2950388  | 0.769007629 | 0.867753094 |
| 230825_at   | 0.000340919 | 0.015394748 | 0.987769578 | 0.994153766 |
| 230826_at   | -0.21579763 | -4.43753227 | 4.08E-05    | 0.000347293 |
| 230827_at   | 0.031308492 | 0.955426938 | 0.343289019 | 0.526267377 |
| 230828_at   | 0.121159686 | 2.257333505 | 0.027730965 | 0.079891208 |
| 230829_at   | -0.05865967 | -1.7964451  | 0.077581499 | 0.179289122 |
| 230830_at   | -0.014603   | -0.40305348 | 0.688376506 | 0.814339258 |
| 230831_at   | 0.143122744 | 1.740830134 | 0.086964864 | 0.195859388 |
| 230832_at   | -0.01954673 | -0.73433644 | 0.465673711 | 0.643275414 |
| 230833_at   | 0.021862113 | 0.669967277 | 0.50551174  | 0.677167242 |
| 230834_at   | -0.11419105 | -2.59390693 | 0.011968841 | 0.040388965 |
| 230835_at   | -0.11681926 | -3.71761207 | 0.000451836 | 0.002629357 |
| 230836_at   | 0.004457469 | 0.110306361 | 0.912543539 | 0.953749891 |
| 230837_at   | 0.045819102 | 1.359924083 | 0.179066238 | 0.334807312 |
| 230838_s_at | 0.081741306 | 2.253464539 | 0.027988223 | 0.080531005 |
| 230839_at   | -0.63687061 | -6.66024115 | 1.05E-08    | 4.61E-07    |
| 230840_at   | 0.054546135 | 1.33956466  | 0.185562052 | 0.343273282 |
| 230841_at   | 0.075661821 | 2.21382899  | 0.030747635 | 0.086797132 |
| 230842_at   | -0.01456993 | -0.44257608 | 0.659702664 | 0.794273476 |
| 230843_at   | 0.090543367 | 2.446842308 | 0.017432139 | 0.055097393 |
| 230844_at   | 0.007452524 | 0.201511911 | 0.840996591 | 0.912587279 |
| 230845_at   | -0.03362327 | -0.96539125 | 0.338318431 | 0.521078045 |
| 230846_at   | -0.98392589 | -6.87147665 | 4.61E-09    | 2.62E-07    |
| 230847_at   | 0.073574818 | 1.86948296  | 0.066557589 | 0.159512644 |
| 230848_s_at | -0.01251727 | -0.29976037 | 0.765421274 | 0.865220113 |
| 230849_at   | -1.12308705 | -8.05942952 | 4.56E-11    | 1.37E-08    |
| 230850_at   | 0.177839049 | 4.081759963 | 0.000137204 | 0.000962024 |
| 230851_x_at | 0.049043315 | 1.545063329 | 0.12771777  | 0.261697716 |
| 230852_at   | -0.0165412  | -0.42120889 | 0.675144398 | 0.80478825  |
| 230853_at   | -0.0453651  | -1.20554283 | 0.232842006 | 0.401426336 |
| 230854_at   | 0.007331544 | 0.185768575 | 0.853268159 | 0.919584763 |
| 230855_at   | 0.080585352 | 2.394534338 | 0.019861193 | 0.061245873 |
| 230856_at   | 0.025829041 | 0.682954379 | 0.497328474 | 0.670485797 |
| 230857_s_at | -0.03650288 | -0.95730365 | 0.342349204 | 0.525327492 |
| 230858_at   | 0.00512553  | 0.169509909 | 0.865979728 | 0.927595963 |
| 230859_at   | -0.1837092  | -3.20554424 | 0.002184146 | 0.009818449 |
| 230860_at   | -0.11801285 | -2.13442876 | 0.037004243 | 0.100546791 |
| 230861_at   | 0.010497267 | 0.314315091 | 0.754398702 | 0.858777045 |
| 230862_at   | 0.002376083 | 0.082549599 | 0.934491169 | 0.965916077 |
| 230863_at   | 0.398120047 | 3.618167454 | 0.000619556 | 0.003430638 |
| 230864_at   | -0.00898707 | -0.2072026  | 0.836570398 | 0.909883046 |
| 230865_at   | 0.923429022 | 6.473180329 | 2.15E-08    | 7.78E-07    |
| 230866_at   | -0.01174709 | -0.36488918 | 0.716508491 | 0.833944445 |
| 230867_at   | 0.009509325 | 0.235722138 | 0.814470656 | 0.896052053 |
| 230868_at   | 0.207720032 | 5.097445442 | 3.87E-06    | 4.89E-05    |
| 230869_at   | -0.08998285 | -1.52108893 | 0.133618595 | 0.270579169 |
| 230870_at   | 0.031927389 | 0.974675314 | 0.333730052 | 0.516449566 |
| 230871_at   | 0.018276309 | 0.431278459 | 0.667849287 | 0.799870569 |
| 230872_s_at | 0.085558362 | 1.334169595 | 0.187312992 | 0.345254762 |
| 230873_at   | 0.23005756  | 5.752046853 | 3.39E-07    | 6.62E-06    |
| 230874_at   | -0.16135558 | -3.06828474 | 0.003258356 | 0.013775654 |
| 230875_s_at | 0.273521075 | 2.725337051 | 0.00845717  | 0.030461624 |
| 230876_at   | -0.25985184 | -3.39785609 | 0.001226732 | 0.006048664 |
| 230877_at   | -0.0585941  | -1.53252586 | 0.130777164 | 0.266394394 |
| 230878_s_at | 0.045987183 | 1.283003459 | 0.204544991 | 0.367631495 |
| 230879_at   | 0.059850735 | 1.499732403 | 0.139055449 | 0.278609618 |
| 230880_at   | 0.008551578 | 0.287749724 | 0.774554123 | 0.870961702 |
| 230881_at   | 0.027851664 | 0.850253028 | 0.398647116 | 0.580961193 |
| 230882_at   | -0.3546679  | -6.33917872 | 3.61E-08    | 1.15E-06    |
| 230883_at   | -0.04897212 | -1.37548902 | 0.174218244 | 0.328211514 |
| 230884_s_at | -0.14942341 | -3.07602016 | 0.003186582 | 0.013510551 |
| 230885_at   | 0.183024379 | 3.81208802  | 0.000333413 | 0.002034254 |
| 230886_at   | 0.275433478 | 5.008723463 | 5.35E-06    | 6.36E-05    |
| 230887_at   | 0.10712343  | 2.63625061  | 0.010714101 | 0.03685044  |
| 230888_at   | -0.01390741 | -0.50761721 | 0.6136282   | 0.761862527 |
| 230889_at   | 0.138066648 | 3.006758025 | 0.00388539  | 0.016011604 |
| 230890_at   | 0.016970682 | 0.601027879 | 0.550140602 | 0.71311804  |

|             |             |             |             |             |
|-------------|-------------|-------------|-------------|-------------|
| 230891_at   | -0.02712991 | -0.71569582 | 0.477023021 | 0.652707164 |
| 230892_at   | 0.25739132  | 4.940183695 | 6.86E-06    | 7.84E-05    |
| 230893_at   | 0.116385301 | 2.559455931 | 0.013086718 | 0.043444939 |
| 230894_s_at | 0.048537898 | 1.26369051  | 0.211348135 | 0.376272591 |
| 230895_at   | -0.00279548 | -0.11387411 | 0.909727061 | 0.952345213 |
| 230896_at   | -0.05309995 | -1.30781204 | 0.19604744  | 0.356714546 |
| 230897_at   | 0.025299722 | 0.53893312  | 0.591975822 | 0.745654954 |
| 230898_at   | 0.027097601 | 0.726598881 | 0.470365936 | 0.647037287 |
| 230899_at   | -0.02239387 | -0.63041378 | 0.530876142 | 0.698046914 |
| 230900_at   | -0.22410827 | -3.97910139 | 0.000193043 | 0.001277959 |
| 230901_x_at | 0.002527422 | 0.078281018 | 0.937871361 | 0.96750215  |
| 230902_at   | 0.016621238 | 0.296933363 | 0.767567965 | 0.86685739  |
| 230903_s_at | -0.22655093 | -4.91368493 | 7.55E-06    | 8.46E-05    |
| 230904_at   | 0.006340481 | 0.094027964 | 0.925407893 | 0.960860757 |
| 230905_at   | -0.00834678 | -0.21496273 | 0.830543166 | 0.906146965 |
| 230906_at   | 0.099382895 | 2.878865429 | 0.005564055 | 0.021520447 |
| 230907_at   | -0.08018443 | -2.66084845 | 0.010041492 | 0.035026156 |
| 230908_at   | -0.12477667 | -2.28137373 | 0.026178846 | 0.076494652 |
| 230909_at   | -0.06170569 | -1.92258144 | 0.059400313 | 0.145847643 |
| 230910_s_at | -0.00690008 | -0.18228049 | 0.85599209  | 0.921165386 |
| 230911_at   | 0.062854678 | 1.550334779 | 0.1264486   | 0.259803275 |
| 230912_at   | -0.10151363 | -2.64415159 | 0.010493703 | 0.036257292 |
| 230913_at   | -0.17857485 | -2.19106986 | 0.032438131 | 0.090658806 |
| 230914_at   | -0.02457612 | -0.63440265 | 0.528288483 | 0.695975383 |
| 230915_at   | -0.03324264 | -1.02476651 | 0.309687544 | 0.490282661 |
| 230916_at   | 0.057713548 | 1.800666749 | 0.076905137 | 0.178048299 |
| 230917_at   | 0.052097272 | 1.215016526 | 0.229235532 | 0.396959111 |
| 230918_at   | 0.029162113 | 0.615807514 | 0.540407517 | 0.705968629 |
| 230919_at   | -0.12871796 | -4.22076657 | 8.59E-05    | 0.000647692 |
| 230920_at   | -0.00465633 | -0.15491035 | 0.877424636 | 0.934442079 |
| 230921_s_at | -0.01732068 | -0.75615635 | 0.452586336 | 0.631935407 |
| 230922_x_at | -0.07081454 | -2.59144258 | 0.012045826 | 0.040616    |
| 230923_at   | -0.06918432 | -0.94294853 | 0.349580883 | 0.532660626 |
| 230924_at   | -0.01753186 | -0.50363749 | 0.61640534  | 0.764071221 |
| 230925_at   | 0.266628291 | 2.515879972 | 0.014636023 | 0.047599558 |
| 230926_s_at | 0.005259343 | 0.140694272 | 0.888594264 | 0.940287791 |
| 230927_at   | -0.1505904  | -3.12714719 | 0.002748121 | 0.011928811 |
| 230928_at   | -0.14955935 | -2.41286309 | 0.018977537 | 0.059079414 |
| 230929_s_at | 0.018654198 | 0.421916135 | 0.674630988 | 0.804513843 |
| 230930_at   | -0.00330448 | -0.1271295  | 0.899273387 | 0.94612223  |
| 230931_at   | 0.022658485 | 0.555277581 | 0.580819663 | 0.737086836 |
| 230932_at   | -0.49109954 | -4.91615596 | 7.48E-06    | 8.41E-05    |
| 230933_at   | -0.05268385 | -1.52625254 | 0.132329719 | 0.26865085  |
| 230934_at   | 0.047989845 | 1.141170794 | 0.258443637 | 0.432322605 |
| 230935_at   | 0.027693032 | 0.801451853 | 0.42610987  | 0.607435243 |
| 230936_at   | 0.093249306 | 1.749462727 | 0.085449512 | 0.193186441 |
| 230937_at   | -0.00211167 | -0.07297695 | 0.942073126 | 0.969988442 |
| 230938_x_at | 0.024452147 | 0.717578596 | 0.47586969  | 0.651816471 |
| 230939_at   | 0.083744047 | 2.015197293 | 0.048481324 | 0.124445886 |
| 230940_at   | 0.010331695 | 0.367854035 | 0.711430821 | 0.832388185 |
| 230941_at   | 0.10923894  | 3.252089297 | 0.00190281  | 0.008747212 |
| 230942_at   | 0.111158429 | 0.833660607 | 0.40785951  | 0.590076632 |
| 230943_at   | 0.018728854 | 0.431707693 | 0.667539028 | 0.799765548 |
| 230944_at   | -0.01340917 | -0.49002801 | 0.625944793 | 0.770892526 |
| 230945_at   | 0.099903677 | 2.824808869 | 0.006457954 | 0.024349858 |
| 230946_at   | 0.007367306 | 0.147845352 | 0.882972651 | 0.937402041 |
| 230947_at   | -0.08011221 | -2.0880661  | 0.041150056 | 0.109384304 |
| 230948_at   | 0.016773314 | 0.417096136 | 0.678133051 | 0.807060679 |
| 230949_at   | 0.018941371 | 0.514179626 | 0.609061205 | 0.758390822 |
| 230950_at   | 0.0563192   | 1.528484182 | 0.13177575  | 0.2677573   |
| 230951_at   | 0.001884454 | 0.053397332 | 0.957597058 | 0.978304936 |
| 230952_at   | -0.02069426 | -0.57411387 | 0.568089267 | 0.727458971 |
| 230953_at   | -0.02575932 | -0.75478741 | 0.453401098 | 0.632695935 |
| 230954_at   | 0.090251639 | 1.994536989 | 0.050754626 | 0.12901409  |
| 230955_s_at | -0.01195789 | -0.24555927 | 0.806881906 | 0.891352729 |
| 230956_at   | 0.048023179 | 1.092606344 | 0.279040761 | 0.455924018 |
| 230957_at   | 0.049777158 | 1.192990137 | 0.237683947 | 0.407135448 |
| 230958_s_at | 0.289906414 | 4.008942916 | 0.000174878 | 0.001176334 |
| 230959_at   | 0.024875095 | 0.634912808 | 0.527958008 | 0.695724584 |
| 230960_at   | 0.018543696 | 0.686061781 | 0.495381261 | 0.668529114 |
| 230961_at   | 0.03734644  | 0.949720352 | 0.346157132 | 0.529266321 |
| 230962_at   | -0.59396897 | -6.29098255 | 4.34E-08    | 1.32E-06    |
| 230963_at   | -0.00572255 | -0.15155843 | 0.880056084 | 0.935683752 |
| 230964_at   | 0.11734087  | 1.680249247 | 0.098235806 | 0.214666274 |
| 230965_at   | -0.00790122 | -0.224758   | 0.822949884 | 0.901695953 |

|             |             |             |             |             |
|-------------|-------------|-------------|-------------|-------------|
| 230966_at   | 0.016789024 | 0.443193715 | 0.659258473 | 0.794066434 |
| 230967_s_at | 0.00680358  | 0.132208041 | 0.89527291  | 0.943908355 |
| 230968_at   | -0.00990614 | -0.20982588 | 0.834531799 | 0.90879847  |
| 230969_at   | -0.05803495 | -1.13443066 | 0.261235877 | 0.435558806 |
| 230970_at   | 0.476537127 | 3.877578542 | 0.000269472 | 0.001696473 |
| 230971_x_at | 0.03211717  | 0.786418294 | 0.434793041 | 0.615493394 |
| 230972_at   | 0.295318357 | 4.505343658 | 3.22E-05    | 0.000284147 |
| 230973_at   | -0.66241774 | -7.24623194 | 1.08E-09    | 9.77E-08    |
| 230974_at   | -0.02374914 | -0.78031567 | 0.438347532 | 0.618820769 |
| 230975_at   | -0.01507586 | -0.50877783 | 0.612819357 | 0.761207058 |
| 230976_at   | 0.036280198 | 1.041958788 | 0.301712977 | 0.481319164 |
| 230977_at   | -0.16174578 | -5.65905237 | 4.81E-07    | 8.78E-06    |
| 230978_at   | -0.10358017 | -2.00427847 | 0.049671578 | 0.126830954 |
| 230979_at   | 0.138970152 | 3.134425749 | 0.002690506 | 0.011721983 |
| 230980_x_at | 0.04685026  | 1.000963031 | 0.320962502 | 0.502820251 |
| 230981_at   | -0.00758037 | -0.21989954 | 0.826714078 | 0.903866865 |
| 230982_at   | -0.09175969 | -2.7277416  | 0.008402791 | 0.030292615 |
| 230983_at   | -0.00703766 | -0.16928699 | 0.866154269 | 0.927657885 |
| 230984_s_at | 0.04239768  | 1.01352951  | 0.3149763   | 0.496265468 |
| 230985_at   | -0.05758955 | -1.85770526 | 0.068240297 | 0.162569048 |
| 230986_at   | -0.20831462 | -3.78445263 | 0.000364558 | 0.002188426 |
| 230987_at   | 0.101304815 | 1.608179606 | 0.113173983 | 0.238862555 |
| 230988_at   | -0.30861905 | -5.12305109 | 3.53E-06    | 4.52E-05    |
| 230989_s_at | -0.0511357  | -1.85851079 | 0.068124076 | 0.162378731 |
| 230990_at   | 0.002761945 | 0.073315061 | 0.941805231 | 0.969842382 |
| 230991_at   | -0.20412278 | -4.80003865 | 1.14E-05    | 0.000118599 |
| 230992_at   | 0.074665891 | 2.049518852 | 0.044898628 | 0.117276999 |
| 230993_s_at | 0.087447839 | 2.299109978 | 0.025083602 | 0.073922608 |
| 230994_at   | -0.01296687 | -0.29877106 | 0.766172302 | 0.865709139 |
| 230995_at   | 0.043199101 | 1.236558957 | 0.221186863 | 0.388145252 |
| 230996_at   | -0.00663159 | -0.19167642 | 0.848658688 | 0.916894408 |
| 230997_at   | 0.169235375 | 2.971887775 | 0.004288961 | 0.017386144 |
| 230998_at   | 0.053979784 | 1.938898291 | 0.057336922 | 0.141958989 |
| 230999_at   | 0.012000373 | 0.420508638 | 0.675652889 | 0.805175688 |
| 231000_at   | 0.026480025 | 0.858021458 | 0.394378474 | 0.577017048 |
| 231001_at   | 0.19699104  | 2.780860003 | 0.007280432 | 0.026897336 |
| 231002_s_at | 0.100339634 | 2.789471089 | 0.007112054 | 0.026393084 |
| 231003_at   | -0.11799231 | -2.9490679  | 0.004573817 | 0.018342877 |
| 231004_s_at | -0.0643265  | -1.43121482 | 0.157683399 | 0.305020189 |
| 231005_at   | 0.165394835 | 4.027862184 | 0.000164227 | 0.001115444 |
| 231006_at   | 0.030396564 | 1.068953254 | 0.289476851 | 0.467725937 |
| 231007_at   | -0.06589286 | -2.08344976 | 0.041584157 | 0.110249698 |
| 231008_at   | 0.02806353  | 0.724883428 | 0.471409841 | 0.647769691 |
| 231009_at   | -0.08895904 | -2.65881595 | 0.010095572 | 0.035164157 |
| 231010_at   | -0.0533808  | -1.37341598 | 0.174858066 | 0.329064748 |
| 231011_at   | -0.13437247 | -3.12361637 | 0.002776485 | 0.012037644 |
| 231012_at   | -0.00982122 | -0.34880431 | 0.728487108 | 0.841541197 |
| 231013_at   | -0.02661723 | -0.48710783 | 0.628000138 | 0.772503087 |
| 231014_at   | -0.01140519 | -0.30368643 | 0.76244308  | 0.863382221 |
| 231015_at   | 0.308724445 | 4.408260921 | 4.51E-05    | 0.00037761  |
| 231016_s_at | 0.011093449 | 0.28485272  | 0.776761847 | 0.872040003 |
| 231017_at   | 0.111796408 | 2.359116068 | 0.021673771 | 0.065728721 |
| 231018_at   | 0.091366775 | 2.440100412 | 0.017729452 | 0.055847468 |
| 231019_x_at | -0.13720925 | -3.28600289 | 0.001719714 | 0.008034441 |
| 231020_at   | 0.060583032 | 1.407922451 | 0.164440093 | 0.314725146 |
| 231021_at   | 0.050696854 | 1.324533878 | 0.1904713   | 0.349332868 |
| 231022_at   | 0.190692325 | 3.754409017 | 0.000401577 | 0.00237933  |
| 231023_at   | -0.00935548 | -0.30045173 | 0.76489657  | 0.864889501 |
| 231024_at   | -0.16266267 | -2.69115682 | 0.009265852 | 0.032829354 |
| 231025_at   | -0.10591282 | -2.39219531 | 0.019976573 | 0.061521017 |
| 231026_at   | 0.016828952 | 0.362241298 | 0.718475588 | 0.835241466 |
| 231027_at   | -0.04719435 | -1.51303639 | 0.13564843  | 0.273611033 |
| 231028_at   | 0.010161703 | 0.293208777 | 0.770399026 | 0.86860014  |
| 231029_at   | 0.16978784  | 2.31952594  | 0.023873413 | 0.071096859 |
| 231030_at   | 0.070834155 | 1.928019458 | 0.058705719 | 0.144419883 |
| 231031_at   | -0.45235568 | -4.13225173 | 0.000115822 | 0.000834484 |
| 231032_at   | 0.003961728 | 0.113024098 | 0.910397982 | 0.952735134 |
| 231033_at   | -0.05934453 | -2.19700091 | 0.031989895 | 0.089673558 |
| 231034_s_at | 0.059254788 | 0.989336032 | 0.326568655 | 0.508792547 |
| 231035_s_at | -0.04707591 | -1.30138244 | 0.198223844 | 0.359392294 |
| 231036_at   | 0.060000946 | 2.205421763 | 0.03136285  | 0.088216281 |
| 231037_at   | 0.048143561 | 1.509367547 | 0.136581314 | 0.274923496 |
| 231038_s_at | -0.06260736 | -1.83191739 | 0.072050215 | 0.169413492 |
| 231039_at   | 0.062848145 | 2.160232967 | 0.03485864  | 0.095953581 |
| 231040_at   | 0.148882105 | 1.818701026 | 0.074071092 | 0.172974461 |

|             |             |             |             |             |
|-------------|-------------|-------------|-------------|-------------|
| 231041_at   | 0.024609125 | 0.69794211  | 0.487975266 | 0.662331539 |
| 231042_s_at | -0.00269792 | -0.09203264 | 0.926986189 | 0.961739832 |
| 231043_at   | 0.109564316 | 1.969575835 | 0.053622786 | 0.134695905 |
| 231044_at   | 0.048144138 | 0.641351308 | 0.523796536 | 0.692404827 |
| 231045_x_at | -0.32807585 | -4.56593049 | 2.60E-05    | 0.000238773 |
| 231046_at   | 0.020880446 | 0.40908218  | 0.683971531 | 0.811101737 |
| 231047_at   | 0.022366242 | 0.519038593 | 0.605689722 | 0.755624304 |
| 231048_at   | 9.25E-05    | 0.003137454 | 0.997507341 | 0.998781182 |
| 231049_at   | 0.148197278 | 1.40129666  | 0.166402425 | 0.317564735 |
| 231050_at   | 0.157138535 | 3.264948528 | 0.001831323 | 0.008476126 |
| 231051_at   | -0.01134161 | -0.29980219 | 0.765389534 | 0.865206118 |
| 231052_at   | -0.09778998 | -1.88945574 | 0.063784174 | 0.154339054 |
| 231053_at   | -0.19578029 | -5.87643163 | 2.12E-07    | 4.52E-06    |
| 231054_at   | -0.011052   | -0.36532285 | 0.716186506 | 0.83377549  |
| 231055_at   | 0.005720903 | 0.138344158 | 0.890443008 | 0.941352547 |
| 231056_at   | 0.054958802 | 1.817518642 | 0.074254181 | 0.173302409 |
| 231057_at   | 0.158996993 | 3.77106991  | 0.000380625 | 0.00227236  |
| 231058_at   | 0.057497433 | 1.599736189 | 0.1150384   | 0.241875054 |
| 231059_x_at | -0.00277809 | -0.0713583  | 0.943355718 | 0.970790342 |
| 231060_at   | -0.00429651 | -0.12220471 | 0.90315526  | 0.948553918 |
| 231061_at   | 0.045613523 | 1.330989098 | 0.188351052 | 0.346582065 |
| 231062_at   | -0.14501426 | -3.68394586 | 0.000503048 | 0.002880492 |
| 231063_at   | 0.04599987  | 2.104625324 | 0.039625132 | 0.106087964 |
| 231064_s_at | -0.00537418 | -0.1489822  | 0.882079497 | 0.936921211 |
| 231065_at   | -0.04568467 | -1.33306412 | 0.187673309 | 0.345719283 |
| 231066_s_at | -0.04008819 | -1.08134178 | 0.283977673 | 0.461493406 |
| 231067_s_at | -0.44510966 | -5.17886655 | 2.87E-06    | 3.81E-05    |
| 231068_at   | 0.45435854  | 3.22003894  | 0.002092592 | 0.009464845 |
| 231069_at   | -0.08345987 | -3.04379503 | 0.003495671 | 0.014628141 |
| 231070_at   | -0.00925521 | -0.54105974 | 0.590518564 | 0.744574853 |
| 231071_at   | 0.115568315 | 2.352445626 | 0.022031217 | 0.066618346 |
| 231072_at   | 0.012024458 | 0.323261437 | 0.747648675 | 0.854488405 |
| 231073_at   | 0.037563168 | 0.985197861 | 0.328579599 | 0.511098407 |
| 231074_at   | -0.12625831 | -2.80382334 | 0.006839364 | 0.02554866  |
| 231075_x_at | 0.02249302  | 0.468985822 | 0.640820924 | 0.78173296  |
| 231076_at   | -0.01772166 | -0.56669315 | 0.573088154 | 0.731157038 |
| 231077_at   | 0.601702883 | 4.019816574 | 0.000168677 | 0.001140301 |
| 231078_at   | -0.02388064 | -0.75979298 | 0.450426023 | 0.629863573 |
| 231079_at   | 0.086530165 | 3.031690952 | 0.003618833 | 0.01505192  |
| 231080_at   | 0.007733976 | 0.174179516 | 0.862325077 | 0.925106996 |
| 231081_at   | 0.150352306 | 2.855257857 | 0.005939348 | 0.022714472 |
| 231082_at   | -0.01407619 | -0.32090817 | 0.74942232  | 0.855552833 |
| 231083_at   | -0.04960004 | -1.28519842 | 0.203782256 | 0.366717801 |
| 231084_at   | 0.483707184 | 2.687362331 | 0.009359863 | 0.033081138 |
| 231085_s_at | 0.000526642 | 0.02339391  | 0.981415588 | 0.990591839 |
| 231086_at   | 0.012513568 | 0.405534389 | 0.686562463 | 0.81283874  |
| 231087_at   | -0.64737993 | -7.83658796 | 1.08E-10    | 2.19E-08    |
| 231088_at   | 0.118099595 | 3.787836021 | 0.0003606   | 0.002169622 |
| 231089_at   | -0.01364213 | -0.35215378 | 0.725986988 | 0.839955743 |
| 231090_s_at | 0.136306474 | 3.72800594  | 0.00043706  | 0.002555017 |
| 231091_x_at | -0.0003592  | -0.01361282 | 0.989185142 | 0.9949255   |
| 231092_s_at | -0.03994206 | -1.18567879 | 0.240537553 | 0.410562385 |
| 231093_at   | 0.073877348 | 1.988108968 | 0.051480345 | 0.130465528 |
| 231094_s_at | -0.01048337 | -0.31843777 | 0.751285706 | 0.856913988 |
| 231095_at   | 0.072149781 | 2.24422158  | 0.02861137  | 0.081994187 |
| 231096_at   | -0.04591898 | -1.28051372 | 0.205412738 | 0.368612973 |
| 231097_at   | 0.006911584 | 0.246320676 | 0.806295295 | 0.891005006 |
| 231098_at   | 0.245621155 | 4.098218403 | 0.000129847 | 0.000920251 |
| 231099_at   | 0.147768939 | 4.117085307 | 0.000121881 | 0.000871953 |
| 231100_at   | -0.02706533 | -0.69591736 | 0.489233115 | 0.663615588 |
| 231101_at   | -0.17898865 | -3.34572766 | 0.001437008 | 0.006914593 |
| 231102_at   | -0.13784805 | -3.37966138 | 0.001296576 | 0.006337115 |
| 231103_at   | 0.179926276 | 2.723497829 | 0.008498981 | 0.030585109 |
| 231104_at   | -0.1279228  | -3.40239862 | 0.001209858 | 0.005976016 |
| 231105_at   | 0.009350727 | 0.224322041 | 0.823287485 | 0.901778449 |
| 231106_at   | -0.03372377 | -0.71977121 | 0.474528538 | 0.650520826 |
| 231107_at   | 0.109338511 | 2.172719787 | 0.033860061 | 0.093776653 |
| 231108_at   | 0.116579832 | 3.336239589 | 0.001478775 | 0.007084296 |
| 231109_at   | 0.165844554 | 1.466759447 | 0.147790926 | 0.29116918  |
| 231110_at   | 0.080639146 | 2.055555357 | 0.044292765 | 0.116033543 |
| 231111_at   | 0.118905882 | 3.375843457 | 0.001311702 | 0.006401943 |
| 231112_at   | 0.051390263 | 1.568414942 | 0.122171941 | 0.25297018  |
| 231113_at   | -0.04677144 | -1.25862434 | 0.213160215 | 0.378488531 |
| 231114_at   | 0.015343066 | 0.517662628 | 0.60664359  | 0.756434221 |
| 231115_at   | 0.021491422 | 0.756623786 | 0.452308326 | 0.631645898 |

|             |             |             |             |             |
|-------------|-------------|-------------|-------------|-------------|
| 231116_at   | -0.05056704 | -1.31886382 | 0.192348487 | 0.351923633 |
| 231117_at   | 0.305453825 | 5.145344401 | 3.25E-06    | 4.22E-05    |
| 231118_at   | 0.329805894 | 5.245927451 | 2.24E-06    | 3.11E-05    |
| 231119_at   | 0.05005287  | 1.360793908 | 0.178792627 | 0.334390697 |
| 231120_x_at | -0.05509194 | -1.63973698 | 0.106420909 | 0.228069592 |
| 231121_at   | 0.015789777 | 0.632360172 | 0.529612655 | 0.697061758 |
| 231122_x_at | 0.00329033  | 0.120762488 | 0.904292522 | 0.949279875 |
| 231123_at   | -0.01980357 | -0.50166446 | 0.617784265 | 0.765223092 |
| 231124_x_at | 0.017252968 | 0.530116704 | 0.59803521  | 0.750221456 |
| 231125_at   | 0.07165864  | 2.411132005 | 0.019059461 | 0.059289025 |
| 231126_at   | 0.027489699 | 0.742895598 | 0.460514464 | 0.638992593 |
| 231127_at   | -0.04361965 | -0.95526629 | 0.343369545 | 0.526318609 |
| 231128_at   | 0.208225447 | 2.371543196 | 0.021021627 | 0.06412084  |
| 231129_at   | -0.02615488 | -0.83028771 | 0.409747996 | 0.591927383 |
| 231130_at   | -0.0828848  | -2.27723024 | 0.026440744 | 0.077063371 |
| 231131_at   | -0.20859628 | -3.5872652  | 0.000682793 | 0.00371867  |
| 231132_at   | -0.02482675 | -0.67463269 | 0.502563681 | 0.674734921 |
| 231133_at   | 0.171537478 | 2.457248025 | 0.016982048 | 0.053914787 |
| 231134_at   | -0.02535356 | -0.71121099 | 0.479776616 | 0.655183076 |
| 231135_at   | 0.030417738 | 0.96595784  | 0.338037227 | 0.520861691 |
| 231136_at   | 0.148526913 | 2.744199723 | 0.008039121 | 0.029214516 |
| 231137_at   | -0.03703366 | -1.1241123  | 0.265551802 | 0.440715998 |
| 231138_at   | 0.005058497 | 0.189651809 | 0.850237758 | 0.917790082 |
| 231139_at   | 7.31E-05    | 0.002422664 | 0.998075229 | 0.999059878 |
| 231140_at   | 0.051413061 | 1.452791691 | 0.151618707 | 0.296506757 |
| 231141_at   | 0.071851807 | 2.489262105 | 0.015662164 | 0.050394056 |
| 231142_at   | 0.075251332 | 2.993777099 | 0.004031304 | 0.01649579  |
| 231143_at   | -0.02851989 | -0.90624685 | 0.368518682 | 0.551716365 |
| 231144_at   | -0.00760117 | -0.21264295 | 0.832343869 | 0.907332202 |
| 231145_at   | -0.07072157 | -1.89942201 | 0.062437277 | 0.151753686 |
| 231146_at   | 0.066951579 | 2.053832175 | 0.044464988 | 0.11639787  |
| 231147_at   | 0.045593302 | 1.220949121 | 0.226997957 | 0.39450273  |
| 231148_at   | -0.0298983  | -0.99543352 | 0.323260557 | 0.50566508  |
| 231149_s_at | 0.113512789 | 1.347706238 | 0.18294329  | 0.339821343 |
| 231150_at   | 0.011870708 | 0.338173496 | 0.736441736 | 0.846877677 |
| 231151_at   | -0.47047892 | -7.14129789 | 1.62E-09    | 1.27E-07    |
| 231152_at   | -0.05014485 | -0.89693642 | 0.373425099 | 0.556507871 |
| 231153_at   | -0.01272554 | -0.43802698 | 0.662978076 | 0.796576239 |
| 231154_x_at | 0.007315535 | 0.238844322 | 0.812060109 | 0.894530027 |
| 231155_at   | -0.03917324 | -0.93383782 | 0.354221816 | 0.537368683 |
| 231156_at   | 0.015334906 | 0.511958046 | 0.610605537 | 0.759573097 |
| 231157_at   | -0.05986689 | -1.0710191  | 0.288554761 | 0.466742287 |
| 231158_x_at | -0.02090762 | -0.55876497 | 0.578452427 | 0.735273702 |
| 231159_at   | -0.01137672 | -0.24097088 | 0.810419299 | 0.893563593 |
| 231160_at   | -0.07102871 | -1.88473739 | 0.064430375 | 0.155523754 |
| 231161_x_at | -0.02618421 | -0.46315546 | 0.644969464 | 0.784481148 |
| 231162_at   | 0.110308304 | 3.271414488 | 0.00179634  | 0.008334065 |
| 231163_at   | 0.016782956 | 0.49815502  | 0.620240371 | 0.766969233 |
| 231164_at   | -0.06987199 | -1.54387774 | 0.12800461  | 0.262120598 |
| 231165_at   | 0.000203429 | 0.007672655 | 0.993904244 | 0.997225798 |
| 231166_at   | -0.8927155  | -6.48508811 | 2.06E-08    | 7.54E-07    |
| 231167_at   | 0.131941036 | 1.539704721 | 0.129018319 | 0.263664856 |
| 231168_at   | -0.0180952  | -0.43147782 | 0.667705181 | 0.799824856 |
| 231169_at   | -0.10370016 | -2.28833257 | 0.02574417  | 0.075466249 |
| 231170_at   | -0.78032667 | -8.10344441 | 3.85E-11    | 1.25E-08    |
| 231171_at   | 0.118537799 | 3.727239545 | 0.000438134 | 0.002559618 |
| 231172_at   | 0.313203631 | 2.752770449 | 0.007855513 | 0.028657138 |
| 231173_at   | 0.058129389 | 2.217782107 | 0.030462049 | 0.086127026 |
| 231174_s_at | 0.005493695 | 0.203205004 | 0.839679165 | 0.91160038  |
| 231175_at   | -0.58555321 | -5.37568285 | 1.39E-06    | 2.09E-05    |
| 231176_at   | -0.11739759 | -2.68178314 | 0.009499676 | 0.033466776 |
| 231177_at   | 0.029925641 | 0.810291627 | 0.421052942 | 0.602996062 |
| 231178_at   | 0.019952875 | 0.458052885 | 0.64860949  | 0.786878181 |
| 231179_at   | 0.264495251 | 3.708776295 | 0.000464772 | 0.002693081 |
| 231180_at   | -0.00181021 | -0.0511519  | 0.959378546 | 0.979165543 |
| 231181_at   | -0.00803237 | -0.24039534 | 0.81086329  | 0.893865674 |
| 231182_at   | 0.021154964 | 0.503618416 | 0.616418665 | 0.764071221 |
| 231183_s_at | 0.053440361 | 1.373792205 | 0.174741815 | 0.328906721 |
| 231184_at   | -0.07944975 | -2.0541447  | 0.04443371  | 0.116341401 |
| 231185_at   | -0.0112323  | -0.3086658  | 0.758671074 | 0.86112413  |
| 231186_at   | -0.25129098 | -6.3704768  | 3.20E-08    | 1.05E-06    |
| 231187_at   | -0.00723554 | -0.22632143 | 0.821739468 | 0.900899799 |
| 231188_at   | 0.000554517 | 0.020654495 | 0.983591477 | 0.99200796  |
| 231189_at   | 0.013354872 | 0.412303748 | 0.681622138 | 0.809593916 |
| 231190_at   | -0.0135231  | -0.43956917 | 0.661866933 | 0.795773338 |

|             |             |             |             |             |
|-------------|-------------|-------------|-------------|-------------|
| 231191_at   | -0.00087718 | -0.02396597 | 0.980961222 | 0.990424012 |
| 231192_at   | 0.28975648  | 2.003365964 | 0.049772179 | 0.127022512 |
| 231193_s_at | -0.05057662 | -1.82932258 | 0.072443284 | 0.17001708  |
| 231194_at   | -0.12494527 | -2.67995726 | 0.009545845 | 0.033592356 |
| 231195_at   | -0.00509069 | -0.15019881 | 0.881123855 | 0.936440296 |
| 231196_x_at | -0.03850301 | -0.89207282 | 0.37600454  | 0.558786782 |
| 231197_at   | 0.05177867  | 1.736873298 | 0.087666841 | 0.197122483 |
| 231198_at   | 0.017194785 | 0.408036354 | 0.684734898 | 0.811485136 |
| 231199_at   | 0.102343388 | 2.586685689 | 0.012195701 | 0.041024408 |
| 231200_at   | 0.001302175 | 0.031739159 | 0.974787985 | 0.987265038 |
| 231201_at   | 0.022852348 | 0.479603666 | 0.633295452 | 0.776324548 |
| 231202_at   | 0.015992994 | 0.571581936 | 0.569792472 | 0.728554492 |
| 231203_at   | -0.0747624  | -1.44720247 | 0.153171929 | 0.29869796  |
| 231204_at   | 0.018109588 | 0.948378396 | 0.346833863 | 0.529829974 |
| 231205_at   | 0.224930652 | 5.455071691 | 1.03E-06    | 1.64E-05    |
| 231206_at   | 0.028164044 | 0.774456651 | 0.4417762   | 0.622108641 |
| 231207_at   | -0.03061257 | -0.52810267 | 0.599423467 | 0.751156277 |
| 231208_at   | 0.073606593 | 2.035498486 | 0.046333524 | 0.120237942 |
| 231209_at   | -0.0380317  | -1.16467581 | 0.248872469 | 0.421254316 |
| 231210_at   | -0.09066076 | -2.61829539 | 0.011230741 | 0.038323608 |
| 231211_s_at | -0.09725856 | -2.72143152 | 0.008546181 | 0.030707985 |
| 231212_x_at | 0.049380686 | 1.338878173 | 0.185784156 | 0.343480037 |
| 231213_at   | -0.08854322 | -0.52941264 | 0.598520349 | 0.750550078 |
| 231214_at   | 0.002729618 | 0.083671964 | 0.933602592 | 0.965452861 |
| 231215_at   | 0.024859364 | 0.770543524 | 0.44407489  | 0.624283445 |
| 231216_at   | -0.04875714 | -1.57295126 | 0.121117325 | 0.251287102 |
| 231217_at   | 0.115235695 | 2.848400488 | 0.006052667 | 0.023070856 |
| 231218_at   | -0.03025991 | -0.6342666  | 0.528376632 | 0.696009445 |
| 231219_at   | -0.11286942 | -2.26054042 | 0.027519317 | 0.079423392 |
| 231220_at   | -0.57214445 | -4.98956476 | 5.73E-06    | 6.73E-05    |
| 231221_at   | -0.00080374 | -0.02248214 | 0.98213978  | 0.991054212 |
| 231222_at   | 0.011598324 | 0.343120454 | 0.732736453 | 0.844028391 |
| 231223_at   | -0.52120805 | -5.62313551 | 5.51E-07    | 9.79E-06    |
| 231224_x_at | 0.014856344 | 0.445929627 | 0.657292339 | 0.792610686 |
| 231225_at   | 0.003924922 | 0.084063715 | 0.933292463 | 0.965346932 |
| 231226_at   | -0.10837294 | -2.38379356 | 0.02039598  | 0.062554018 |
| 231227_at   | 0.03695967  | 1.315177758 | 0.193576292 | 0.353547677 |
| 231228_at   | -0.01618675 | -0.38555181 | 0.701225504 | 0.823544705 |
| 231229_at   | -0.1031344  | -2.06861265 | 0.043006417 | 0.113290431 |
| 231230_at   | -0.07559845 | -1.30244979 | 0.197861299 | 0.358885668 |
| 231231_at   | -0.01441237 | -0.39059449 | 0.69751418  | 0.820998255 |
| 231232_at   | -0.02110814 | -0.642936   | 0.522774934 | 0.691586223 |
| 231233_at   | 0.003101651 | 0.075667769 | 0.939941305 | 0.968592501 |
| 231234_at   | -0.03365025 | -0.99058793 | 0.325961913 | 0.508105396 |
| 231235_at   | 0.120820976 | 1.617102384 | 0.111230335 | 0.235854541 |
| 231236_at   | -0.00410727 | -0.12759403 | 0.89890736  | 0.945982552 |
| 231237_x_at | -0.02105877 | -0.61260141 | 0.542511366 | 0.707269858 |
| 231238_at   | 0.22514844  | 3.638531378 | 0.000580982 | 0.003252977 |
| 231239_at   | -0.04819509 | -1.60976193 | 0.112827318 | 0.238358709 |
| 231240_at   | -0.57135938 | -5.73406218 | 3.63E-07    | 6.98E-06    |
| 231241_at   | 0.078845938 | 2.056205824 | 0.044227904 | 0.115897595 |
| 231242_at   | -0.02728576 | -0.52222153 | 0.603485843 | 0.754243009 |
| 231243_s_at | -0.11363798 | -1.72233523 | 0.09028639  | 0.201421622 |
| 231244_at   | -0.0060726  | -0.17162432 | 0.864324521 | 0.92644968  |
| 231245_s_at | 0.007794004 | 0.185994441 | 0.853091836 | 0.919475673 |
| 231246_at   | -0.03082813 | -0.92546527 | 0.358521772 | 0.541612191 |
| 231247_s_at | 0.085678304 | 2.373127085 | 0.020939781 | 0.063927911 |
| 231248_at   | 0.011964944 | 0.327108292 | 0.744752275 | 0.852130241 |
| 231249_at   | -0.03778753 | -1.06927896 | 0.289331339 | 0.467633756 |
| 231250_at   | 0.010104091 | 0.280016578 | 0.780451449 | 0.874517076 |
| 231251_at   | 0.010279071 | 0.215899752 | 0.829816076 | 0.905600216 |
| 231252_at   | -0.14480259 | -2.42694102 | 0.018322935 | 0.057385326 |
| 231253_at   | -0.00791277 | -0.24246408 | 0.809267687 | 0.892896202 |
| 231254_at   | -0.12375571 | -3.61512592 | 0.000625523 | 0.003458603 |
| 231255_at   | 0.013267157 | 0.332644898 | 0.740590117 | 0.849407069 |
| 231256_at   | -0.0025931  | -0.08882495 | 0.929524081 | 0.963277146 |
| 231257_at   | -0.06934352 | -1.72482227 | 0.089833733 | 0.200661783 |
| 231258_at   | -0.02686424 | -0.60691688 | 0.54625182  | 0.710240198 |
| 231259_s_at | 0.010339362 | 0.273809593 | 0.785194328 | 0.877537623 |
| 231260_at   | 0.014247533 | 0.308385849 | 0.758882986 | 0.861205587 |
| 231261_at   | -0.00841046 | -0.29514873 | 0.768924075 | 0.867734321 |
| 231262_at   | 0.250330508 | 3.366533841 | 0.001349289 | 0.006553898 |
| 231263_at   | 0.118691315 | 2.423759271 | 0.018469082 | 0.057748879 |
| 231264_at   | -0.0373686  | -1.12304011 | 0.266003146 | 0.441219292 |
| 231265_at   | -0.05079787 | -1.37700417 | 0.173751741 | 0.327567401 |



|             |             |             |             |             |
|-------------|-------------|-------------|-------------|-------------|
| 231266_at   | -0.06037773 | -1.35232991 | 0.181468634 | 0.337995258 |
| 231267_at   | -0.06419349 | -1.20805242 | 0.231882651 | 0.400303872 |
| 231268_at   | -0.01538942 | -0.28722882 | 0.774950954 | 0.871065937 |
| 231269_at   | -0.04460721 | -1.41154882 | 0.163373684 | 0.313100202 |
| 231270_at   | 0.19952662  | 2.152443243 | 0.035494572 | 0.097332398 |
| 231271_x_at | 0.054467175 | 1.482026484 | 0.143694177 | 0.285281868 |
| 231272_at   | 0.006119633 | 0.198947021 | 0.842993249 | 0.913713562 |
| 231273_x_at | -0.0015703  | -0.05267304 | 0.958171673 | 0.97865248  |
| 231274_s_at | -0.17557139 | -2.3765886  | 0.020761901 | 0.063458548 |
| 231275_at   | -0.0086609  | -0.17746674 | 0.859754153 | 0.923523833 |
| 231276_at   | 0.010247435 | 0.219266531 | 0.827204822 | 0.904141404 |
| 231277_x_at | 0.002564388 | 0.10339035  | 0.918006397 | 0.956615864 |
| 231278_at   | -0.00236427 | -0.06310598 | 0.949897004 | 0.974313708 |
| 231279_at   | 0.018232128 | 0.727055886 | 0.470088056 | 0.646755545 |
| 231280_at   | 0.07787046  | 2.124134369 | 0.037891888 | 0.102429338 |
| 231281_at   | 0.253539196 | 6.030151729 | 1.18E-07    | 2.87E-06    |
| 231282_at   | 0.031112871 | 0.925372227 | 0.358569747 | 0.541666356 |
| 231283_at   | -0.18612452 | -4.74010035 | 1.41E-05    | 0.000141824 |
| 231284_at   | -0.0493778  | -1.56575716 | 0.122793242 | 0.254009516 |
| 231285_at   | -0.01992046 | -0.76746547 | 0.445887945 | 0.625898459 |
| 231286_at   | 0.093829752 | 2.355658015 | 0.021858425 | 0.06621233  |
| 231287_s_at | -0.01286643 | -0.32588573 | 0.745672375 | 0.852864097 |
| 231288_at   | -0.11720121 | -2.44323603 | 0.017590611 | 0.055507985 |
| 231289_at   | 0.041444376 | 0.942085561 | 0.35001877  | 0.533146071 |
| 231290_at   | -0.05644775 | -1.95166533 | 0.055765356 | 0.138984234 |
| 231291_at   | 0.066244293 | 2.394005476 | 0.019887228 | 0.061308349 |
| 231292_at   | -0.11683751 | -2.89387987 | 0.005336916 | 0.020793748 |
| 231293_at   | -0.0269623  | -0.75579167 | 0.452803306 | 0.63210012  |
| 231294_at   | -0.04392319 | -1.51227245 | 0.13584226  | 0.27384133  |
| 231295_at   | -0.06476134 | -1.76333889 | 0.083059634 | 0.188920615 |
| 231296_at   | 0.407219809 | 9.391279392 | 2.75E-13    | 1.54E-09    |
| 231297_at   | -0.09368753 | -2.65752711 | 0.010130002 | 0.03525386  |
| 231298_at   | -0.01159022 | -0.33081469 | 0.741965129 | 0.850411662 |
| 231299_at   | -0.60359868 | -6.17745503 | 6.71E-08    | 1.85E-06    |
| 231300_at   | -0.03029143 | -0.93656228 | 0.352829827 | 0.536000799 |
| 231301_at   | 0.009494416 | 0.368765017 | 0.713632638 | 0.831885805 |
| 231302_at   | 0.050166003 | 1.585899234 | 0.118147287 | 0.246774714 |
| 231303_at   | -0.07834499 | -2.15938395 | 0.034927464 | 0.096091582 |
| 231304_at   | -0.04235467 | -1.35257522 | 0.181390647 | 0.337920418 |
| 231305_at   | 0.061276493 | 1.334220998 | 0.18729625  | 0.345254762 |
| 231306_at   | 0.041539265 | 1.41333008  | 0.162851829 | 0.312287563 |
| 231307_at   | -0.00673981 | -0.28610161 | 0.775809877 | 0.871671946 |
| 231308_at   | 0.038370488 | 1.373765335 | 0.174750115 | 0.328908493 |
| 231309_at   | 0.047680474 | 1.376490774 | 0.173909704 | 0.327799808 |
| 231310_at   | -0.18880218 | -4.41343633 | 4.43E-05    | 0.000371877 |
| 231311_at   | -0.13849824 | -3.5918656  | 0.000673004 | 0.003673413 |
| 231312_at   | -0.04325267 | -1.51027705 | 0.136349581 | 0.274628666 |
| 231313_at   | 0.072523246 | 1.818112839 | 0.074162123 | 0.173114678 |
| 231314_at   | -0.04991919 | -1.12742559 | 0.264160472 | 0.439024423 |
| 231315_at   | 0.072385891 | 1.943791346 | 0.056730199 | 0.140796164 |
| 231316_at   | 0.261989999 | 5.846794173 | 2.37E-07    | 4.92E-06    |
| 231317_at   | -0.00655719 | -0.23465166 | 0.815297555 | 0.896529568 |
| 231318_at   | 0.076001931 | 2.063562673 | 0.043500027 | 0.114379198 |
| 231319_x_at | 0.241448244 | 3.21906917  | 0.002098603 | 0.009489152 |
| 231320_at   | 0.01588713  | 0.512264063 | 0.610392703 | 0.759394581 |
| 231321_s_at | -0.0301409  | -0.89234276 | 0.375861083 | 0.558666474 |
| 231322_at   | 0.026607409 | 0.770413269 | 0.444151527 | 0.62434554  |
| 231323_at   | 0.041441752 | 0.753150096 | 0.454376706 | 0.63353753  |
| 231324_at   | 0.119892779 | 3.497119911 | 0.000904311 | 0.004688572 |
| 231325_at   | -0.20172691 | -3.23595568 | 0.001996221 | 0.009098012 |
| 231326_s_at | -0.00036716 | -0.0103358  | 0.991788503 | 0.996181437 |
| 231327_at   | 0.021318595 | 0.656815374 | 0.513872407 | 0.684489319 |
| 231328_s_at | 0.007124149 | 0.183786511 | 0.854815783 | 0.920658177 |
| 231329_at   | -0.09710252 | -2.59551348 | 0.011918895 | 0.040256898 |
| 231330_at   | -0.00905864 | -0.24370299 | 0.808312508 | 0.89230255  |
| 231331_at   | -0.06260808 | -1.7662984  | 0.082557174 | 0.188008453 |
| 231332_at   | 0.055843231 | 1.318507885 | 0.192466789 | 0.352060682 |
| 231333_at   | -0.04305596 | -1.14901332 | 0.255221501 | 0.428472233 |
| 231334_at   | -0.02718062 | -0.65408182 | 0.51561935  | 0.685800067 |
| 231335_at   | -0.03899739 | -0.998678   | 0.322059147 | 0.503991984 |
| 231336_at   | -0.295807   | -5.45341076 | 1.04E-06    | 1.65E-05    |
| 231337_at   | -0.12221968 | -3.46110416 | 0.001010663 | 0.005140385 |
| 231338_at   | -0.0320525  | -0.92362811 | 0.359469785 | 0.542585823 |
| 231339_at   | -0.0256661  | -0.95973867 | 0.341132316 | 0.52405766  |
| 231340_at   | 0.034020305 | 1.132473853 | 0.262050517 | 0.436545057 |

|             |             |             |             |             |
|-------------|-------------|-------------|-------------|-------------|
| 231341_at   | -1.324573   | -7.13911022 | 1.63E-09    | 1.27E-07    |
| 231342_at   | -0.0052795  | -0.13592277 | 0.892348456 | 0.942363828 |
| 231343_at   | -0.00925143 | -0.3092952  | 0.758194701 | 0.860971049 |
| 231344_at   | -0.01094775 | -0.43028029 | 0.668571009 | 0.800272532 |
| 231345_s_at | 0.012013214 | 0.357927767 | 0.721684178 | 0.837296781 |
| 231346_s_at | 0.000332875 | 0.009379974 | 0.992547852 | 0.99669592  |
| 231347_at   | 0.006243167 | 0.196426265 | 0.844956558 | 0.914796475 |
| 231348_s_at | -0.43827594 | -5.50116304 | 8.70E-07    | 1.43E-05    |
| 231349_at   | 0.041973269 | 1.119471376 | 0.267509326 | 0.442764491 |
| 231350_at   | -0.05770661 | -1.66415449 | 0.101423681 | 0.220029471 |
| 231351_at   | 0.001895555 | 0.057833196 | 0.954078367 | 0.976339395 |
| 231352_at   | -0.04291185 | -1.32521392 | 0.19024709  | 0.349104353 |
| 231353_at   | -0.04644565 | -1.44810617 | 0.152919956 | 0.298362817 |
| 231354_at   | -0.02802766 | -0.74721366 | 0.45792414  | 0.636632863 |
| 231355_at   | -0.2567088  | -4.90929367 | 7.67E-06    | 8.57E-05    |
| 231356_at   | -0.00015322 | -0.005491   | 0.995637502 | 0.997917707 |
| 231357_at   | -0.00609221 | -0.19917889 | 0.842812704 | 0.913604147 |
| 231358_at   | 0.473204138 | 4.28029955  | 7.01E-05    | 0.000545691 |
| 231359_at   | -0.01727094 | -0.42719681 | 0.670802494 | 0.801759378 |
| 231360_at   | -0.03320512 | -0.69469514 | 0.489993268 | 0.664303932 |
| 231361_at   | -0.21382991 | -3.2510987  | 0.001908425 | 0.008769415 |
| 231362_at   | -0.09319983 | -2.00103632 | 0.050029809 | 0.127497988 |
| 231363_at   | -0.05034945 | -1.46303847 | 0.14880316  | 0.29259315  |
| 231364_at   | 0.152149927 | 3.298297391 | 0.001657541 | 0.007792029 |
| 231365_at   | 0.002489868 | 0.063676486 | 0.949444667 | 0.974059672 |
| 231366_at   | -0.0092335  | -0.2690319  | 0.788850644 | 0.879535799 |
| 231367_s_at | -0.07752501 | -2.20288737 | 0.031550422 | 0.088664546 |
| 231368_at   | -0.01437685 | -0.43896079 | 0.662305177 | 0.796129925 |
| 231369_at   | 0.044421312 | 1.683601372 | 0.09758229  | 0.213620955 |
| 231370_at   | 0.110742469 | 1.453617211 | 0.151390345 | 0.296218962 |
| 231371_at   | 0.012991776 | 0.372088814 | 0.711169714 | 0.830357573 |
| 231372_at   | 0.228712289 | 3.730252702 | 0.000433928 | 0.002540026 |
| 231373_at   | -0.05797153 | -1.7708082  | 0.08179637  | 0.18675622  |
| 231374_at   | -0.10128462 | -2.35258803 | 0.022023531 | 0.066599611 |
| 231375_at   | -0.01191089 | -0.343659   | 0.732333464 | 0.843803423 |
| 231376_at   | -0.08138849 | -2.27736844 | 0.026431972 | 0.077043575 |
| 231377_at   | 0.005851937 | 0.145443095 | 0.884860455 | 0.9383907   |
| 231378_at   | -0.03456523 | -1.01683185 | 0.313415756 | 0.494505305 |
| 231379_at   | -0.14879076 | -4.0238032  | 0.000166458 | 0.001127683 |
| 231380_at   | 0.151366659 | 1.319361916 | 0.192183025 | 0.351678489 |
| 231381_at   | 0.029794001 | 0.867408582 | 0.389258392 | 0.572129314 |
| 231382_at   | -0.09009581 | -1.97150344 | 0.053396451 | 0.134240545 |
| 231383_at   | -0.09805515 | -2.75738427 | 0.007758276 | 0.028353328 |
| 231384_at   | -0.46186463 | -3.63177936 | 0.000593511 | 0.003307792 |
| 231385_at   | -0.01936333 | -0.72002531 | 0.47437325  | 0.650387744 |
| 231386_at   | -0.07474736 | -2.17584736 | 0.03361391  | 0.093245165 |
| 231387_at   | -0.01971525 | -0.43070731 | 0.668262217 | 0.800102202 |
| 231388_at   | -0.00707495 | -0.19287899 | 0.847721048 | 0.916302249 |
| 231389_at   | 0.070084836 | 1.458585066 | 0.150021768 | 0.294249665 |
| 231390_at   | -0.07662856 | -2.11136637 | 0.039018586 | 0.104771607 |
| 231391_at   | -0.1234811  | -1.93319192 | 0.058051477 | 0.143267801 |
| 231392_at   | -0.03133487 | -1.27306731 | 0.2080244   | 0.372036053 |
| 231393_x_at | 0.033088525 | 0.60811848  | 0.54546007  | 0.709582345 |
| 231394_at   | -0.13506391 | -3.29424266 | 0.001677807 | 0.007869917 |
| 231395_at   | -0.31566456 | -4.79493638 | 1.16E-05    | 0.000120368 |
| 231396_s_at | -0.02644405 | -1.13936961 | 0.259187731 | 0.433226795 |
| 231397_at   | -0.63738475 | -5.50937175 | 8.44E-07    | 1.39E-05    |
| 231398_at   | -0.00214809 | -0.05703348 | 0.954712669 | 0.976721173 |
| 231399_at   | -0.11895568 | -2.19028501 | 0.032497857 | 0.090780312 |
| 231400_s_at | -0.02752011 | -0.80492569 | 0.424118284 | 0.605662671 |
| 231401_s_at | -0.07088962 | -1.94044649 | 0.057144354 | 0.141631293 |
| 231402_at   | -0.01782665 | -0.37499432 | 0.709019273 | 0.828821127 |
| 231403_at   | 0.089554824 | 2.093644142 | 0.040630777 | 0.10822282  |
| 231404_at   | -0.05014411 | -1.27151919 | 0.208570455 | 0.372678346 |
| 231405_at   | -0.04377608 | -1.60476815 | 0.113924317 | 0.240089646 |
| 231406_at   | -0.29044075 | -4.8847799  | 8.38E-06    | 9.21E-05    |
| 231407_s_at | -0.05360662 | -1.46375561 | 0.148607653 | 0.292359432 |
| 231408_at   | -0.00043856 | -0.01329426 | 0.989438209 | 0.995026494 |
| 231409_at   | -0.05557853 | -1.53375491 | 0.130474697 | 0.265947968 |
| 231410_at   | 0.041436472 | 1.060464438 | 0.293287189 | 0.471819422 |
| 231411_at   | 0.101798897 | 2.392757178 | 0.019948802 | 0.061448646 |
| 231412_at   | 0.055490398 | 1.768113286 | 0.082250298 | 0.187451827 |
| 231413_at   | 0.024750523 | 0.572847563 | 0.568940787 | 0.7279881   |
| 231414_at   | 0.042859806 | 1.495948841 | 0.140036629 | 0.280110863 |
| 231415_at   | -0.04329531 | -1.01282339 | 0.315310658 | 0.496583466 |

|             |             |             |             |             |
|-------------|-------------|-------------|-------------|-------------|
| 231416_at   | -0.05777183 | -2.08101423 | 0.041814783 | 0.110742892 |
| 231417_at   | 0.000200954 | 0.006835252 | 0.994569531 | 0.997403825 |
| 231418_at   | -0.00853981 | -0.23525205 | 0.814833757 | 0.8963412   |
| 231419_at   | -0.03164048 | -0.93078462 | 0.355785984 | 0.538845342 |
| 231420_at   | -0.07810777 | -2.02752414 | 0.047167185 | 0.12184947  |
| 231421_at   | -0.06832755 | -1.9457621  | 0.056487384 | 0.140361069 |
| 231422_x_at | 0.013233686 | 0.451955721 | 0.652970338 | 0.789596004 |
| 231423_s_at | -0.03180601 | -1.02852928 | 0.307930099 | 0.48831716  |
| 231424_at   | 0.00376292  | 0.203230039 | 0.839659688 | 0.91160038  |
| 231425_at   | -0.0162225  | -0.66280869 | 0.510053324 | 0.680924311 |
| 231426_at   | -0.00296002 | -0.08476863 | 0.932734447 | 0.965100847 |
| 231427_at   | 0.003460952 | 0.09416697  | 0.925297952 | 0.96085822  |
| 231428_at   | -0.01884517 | -0.58025347 | 0.563969637 | 0.724508638 |
| 231429_at   | -0.01840934 | -0.56112968 | 0.57684991  | 0.734022807 |
| 231430_at   | 0.410446698 | 5.972978272 | 1.47E-07    | 3.38E-06    |
| 231431_s_at | 0.00367486  | 0.138499982 | 0.890320409 | 0.941267469 |
| 231432_at   | -0.05578067 | -1.56471866 | 0.123036697 | 0.254379965 |
| 231433_at   | -0.07655861 | -2.25343161 | 0.027990421 | 0.080531005 |
| 231434_at   | -0.03604308 | -1.02388661 | 0.310099492 | 0.490704475 |
| 231435_at   | -0.02871532 | -0.72327866 | 0.472387576 | 0.648660262 |
| 231436_at   | 0.083233855 | 2.341319005 | 0.02263917  | 0.068065239 |
| 231437_at   | 0.306709295 | 5.25743251  | 2.15E-06    | 3.01E-05    |
| 231438_x_at | -0.40664676 | -4.99752115 | 5.57E-06    | 6.58E-05    |
| 231439_at   | -0.10261356 | -3.69338359 | 0.000488158 | 0.002807818 |
| 231440_at   | -0.00895431 | -0.22146964 | 0.82549716  | 0.903158439 |
| 231441_at   | -0.0173905  | -0.40933535 | 0.68378679  | 0.810948923 |
| 231442_at   | 0.042417506 | 1.239926967 | 0.21994752  | 0.386866644 |
| 231443_at   | -0.05466956 | -1.82444106 | 0.073187634 | 0.171380082 |
| 231444_at   | -0.07146521 | -2.24181279 | 0.028775767 | 0.082364967 |
| 231445_at   | -0.09110371 | -2.62275788 | 0.011100262 | 0.037947899 |
| 231446_at   | 0.013374699 | 0.395882995 | 0.693629891 | 0.818301272 |
| 231447_at   | 0.028798426 | 0.771633801 | 0.443433725 | 0.623656735 |
| 231448_at   | -0.04185687 | -1.20455042 | 0.233222172 | 0.401876086 |
| 231449_at   | -0.02074787 | -0.57471546 | 0.567684952 | 0.727253794 |
| 231450_at   | 0.010921623 | 0.315136347 | 0.753778252 | 0.858371499 |
| 231451_s_at | -0.0486681  | -1.39290081 | 0.168914871 | 0.320980628 |
| 231452_at   | 0.038294887 | 1.289843025 | 0.202175285 | 0.364618775 |
| 231453_at   | -0.05362775 | -1.91441143 | 0.060457004 | 0.147970668 |
| 231454_at   | -0.02947991 | -0.76297065 | 0.448543266 | 0.628056133 |
| 231455_at   | -0.01813046 | -0.54685075 | 0.586558918 | 0.741527811 |
| 231456_at   | -0.05768413 | -1.44037377 | 0.155086411 | 0.301379332 |
| 231457_at   | -0.02225537 | -0.43707132 | 0.663667007 | 0.797028158 |
| 231458_at   | -0.02047977 | -0.5712122  | 0.570041398 | 0.728624414 |
| 231459_at   | 0.040257311 | 0.992364732 | 0.325102067 | 0.507270458 |
| 231460_at   | -0.01363452 | -0.4298041  | 0.668915431 | 0.800559367 |
| 231461_at   | -0.04284398 | -1.2582679  | 0.213288141 | 0.378583067 |
| 231462_at   | 0.009981229 | 0.293960279 | 0.769827555 | 0.868180703 |
| 231463_at   | -0.09039205 | -2.85965803 | 0.00586767  | 0.02247882  |
| 231464_at   | -0.01967763 | -0.68257802 | 0.497564599 | 0.670662517 |
| 231465_at   | -0.47155212 | -4.95322301 | 6.54E-06    | 7.53E-05    |
| 231466_at   | 0.028570038 | 0.935467705 | 0.353388644 | 0.536573213 |
| 231467_at   | -0.09953652 | -2.0054702  | 0.049540458 | 0.126575699 |
| 231468_at   | 0.119255709 | 2.610594701 | 0.011459194 | 0.03896928  |
| 231469_at   | 0.013721873 | 0.358009909 | 0.72162303  | 0.837285441 |
| 231470_at   | -0.01613963 | -0.4511688  | 0.653534056 | 0.790041617 |
| 231471_at   | -0.04204054 | -0.84609529 | 0.400943412 | 0.583223635 |
| 231472_at   | 0.191851454 | 2.224283111 | 0.029997476 | 0.085120458 |
| 231473_at   | 0.019799289 | 0.541821754 | 0.589996813 | 0.744244749 |
| 231474_at   | -0.0480166  | -1.2616131  | 0.212089802 | 0.377157306 |
| 231475_at   | -0.02091537 | -0.54548252 | 0.587493317 | 0.742310122 |
| 231476_at   | -0.07934907 | -2.27465529 | 0.026604667 | 0.077399802 |
| 231477_at   | 0.010502436 | 0.28919437  | 0.773453897 | 0.870302912 |
| 231478_at   | -0.1198099  | -2.42821562 | 0.018264681 | 0.05724701  |
| 231479_at   | -0.07428955 | -1.97524488 | 0.052959475 | 0.133389588 |
| 231480_at   | -0.01028995 | -0.22719526 | 0.821063134 | 0.900555118 |
| 231481_at   | -0.01056792 | -0.31553142 | 0.753479838 | 0.858124482 |
| 231482_at   | 0.010925649 | 0.340964111 | 0.734350779 | 0.845311397 |
| 231483_at   | -0.01218275 | -0.36983202 | 0.712841656 | 0.831318177 |
| 231484_at   | 0.46113855  | 2.096912843 | 0.040329138 | 0.107566832 |
| 231485_at   | -0.03567455 | -0.8462105  | 0.400879674 | 0.583168882 |
| 231486_x_at | 0.035909495 | 1.524209921 | 0.132838386 | 0.26942651  |
| 231487_at   | -0.03778547 | -1.16201888 | 0.249941447 | 0.422343664 |
| 231488_at   | -0.04725839 | -1.55509946 | 0.125310127 | 0.25805635  |
| 231489_x_at | -0.00841983 | -0.09212798 | 0.926910766 | 0.961706233 |
| 231490_at   | -0.06991568 | -2.29404454 | 0.025392175 | 0.074610591 |

|             |             |             |             |             |
|-------------|-------------|-------------|-------------|-------------|
| 231491_at   | -0.03480414 | -0.91237177 | 0.36531351  | 0.548590149 |
| 231492_at   | -0.04168217 | -1.25058903 | 0.216057861 | 0.382054995 |
| 231493_at   | 0.023247    | 0.870046844 | 0.387826888 | 0.570494348 |
| 231494_at   | 0.035786235 | 1.100663706 | 0.275546401 | 0.451947468 |
| 231495_at   | -0.02489812 | -0.97649336 | 0.332836377 | 0.515494988 |
| 231496_at   | -0.04487287 | -1.30491295 | 0.197026544 | 0.357947573 |
| 231497_at   | 0.09956665  | 2.633697297 | 0.010786223 | 0.037050027 |
| 231498_at   | 0.102399235 | 2.948340352 | 0.004583182 | 0.018365601 |
| 231499_s_at | -0.01919539 | -0.60589845 | 0.546923337 | 0.710647707 |
| 231500_s_at | -0.04691557 | -1.7301837  | 0.088864295 | 0.199004624 |
| 231501_at   | -0.01870439 | -0.43207491 | 0.667273643 | 0.799637681 |
| 231502_at   | 0.006457433 | 0.200883531 | 0.841485662 | 0.91291849  |
| 231503_at   | -0.07279001 | -1.84022543 | 0.07080372  | 0.167055212 |
| 231504_at   | -0.19051219 | -5.03716101 | 4.82E-06    | 5.85E-05    |
| 231505_s_at | -0.10061762 | -1.9680039  | 0.053807966 | 0.135125564 |
| 231506_at   | -0.07595863 | -2.51606853 | 0.014628976 | 0.047580102 |
| 231507_at   | 0.021348188 | 0.646744729 | 0.52032387  | 0.689382818 |
| 231508_s_at | -0.0765707  | -2.67647589 | 0.009634445 | 0.033856157 |
| 231509_at   | -0.00477144 | -0.13247154 | 0.89506542  | 0.943856597 |
| 231510_at   | 0.008777453 | 0.273311228 | 0.785575496 | 0.877701572 |
| 231511_at   | 0.08898799  | -2.26156388 | 0.027452073 | 0.079281942 |
| 231512_at   | 0.046183145 | 1.330819042 | 0.188406677 | 0.346638775 |
| 231513_at   | -0.10671938 | -0.95656451 | 0.342719148 | 0.525682265 |
| 231514_at   | -0.03312746 | -1.1274908  | 0.264133141 | 0.438997334 |
| 231515_at   | -0.0078074  | -0.28767064 | 0.774614369 | 0.871007532 |
| 231516_at   | 0.067709514 | 1.386104526 | 0.170969946 | 0.323825598 |
| 231517_at   | 0.11204223  | 3.5769419   | 0.000705257 | 0.003816824 |
| 231518_at   | 0.03978068  | 1.085548447 | 0.282126969 | 0.459439166 |
| 231519_at   | 0.033438123 | 0.892624886 | 0.375711183 | 0.558573706 |
| 231520_at   | 0.086705553 | 2.001251774 | 0.050005935 | 0.12745895  |
| 231521_at   | 0.009919657 | 0.352837711 | 0.725476849 | 0.839596398 |
| 231522_at   | -0.03514076 | -0.78336108 | 0.436571586 | 0.61713238  |
| 231523_at   | -0.13734825 | -4.38570166 | 4.88E-05    | 0.000403116 |
| 231524_at   | -0.11946326 | -2.90456106 | 0.005180592 | 0.020289961 |
| 231525_at   | -0.03430144 | -0.84627619 | 0.400843332 | 0.583154029 |
| 231526_at   | 0.019318021 | 0.470080533 | 0.640043268 | 0.781180357 |
| 231527_at   | 0.017351127 | 0.536740282 | 0.593480223 | 0.746718093 |
| 231528_at   | 0.055934134 | 1.359895245 | 0.179075315 | 0.334807312 |
| 231529_at   | -0.10342516 | -2.33646429 | 0.022909083 | 0.068747246 |
| 231530_s_at | -0.35530935 | -5.32333962 | 1.69E-06    | 2.47E-05    |
| 231531_at   | -0.03839439 | -1.19954664 | 0.235145885 | 0.404104434 |
| 231532_at   | -0.08286005 | -1.95924036 | 0.054850413 | 0.13718589  |
| 231533_at   | -0.03801336 | -1.18423312 | 0.241104717 | 0.411292493 |
| 231534_at   | -0.02175235 | -0.58107995 | 0.563416202 | 0.724193181 |
| 231535_x_at | -0.02624466 | -0.71565453 | 0.477048334 | 0.652707164 |
| 231536_at   | -0.03571636 | -1.44070421 | 0.154993342 | 0.301250867 |
| 231537_at   | -0.06603656 | -1.65130514 | 0.104028975 | 0.224374449 |
| 231538_at   | -0.10681446 | -2.77730614 | 0.007350987 | 0.027110934 |
| 231539_at   | 0.011731457 | 0.362197152 | 0.718508399 | 0.835241466 |
| 231540_at   | -0.01108728 | -0.37703806 | 0.707508067 | 0.827684026 |
| 231541_s_at | 0.020587495 | 0.527713878 | 0.599691632 | 0.751350353 |
| 231542_at   | -0.0470569  | -1.07229588 | 0.287985884 | 0.466159549 |
| 231543_at   | -0.0083105  | -0.23858572 | 0.812259697 | 0.894654731 |
| 231544_s_at | -0.01689352 | -0.76808794 | 0.445520943 | 0.625666854 |
| 231545_at   | -0.01451025 | -0.39613149 | 0.693447581 | 0.818178409 |
| 231546_at   | -0.00145685 | -0.03896855 | 0.969047997 | 0.984367523 |
| 231547_at   | 0.026745323 | 0.865072199 | 0.390528847 | 0.573393188 |
| 231548_at   | 0.032096083 | 1.052128192 | 0.297062506 | 0.476074284 |
| 231549_at   | 0.054586678 | 1.000295706 | 0.321282509 | 0.50315859  |
| 231550_at   | -0.01591099 | -0.31413824 | 0.754532329 | 0.858878238 |
| 231551_at   | -0.02160022 | -0.64026238 | 0.524499141 | 0.693026123 |
| 231552_at   | 0.042125547 | 1.626706077 | 0.109168653 | 0.232586426 |
| 231553_s_at | 0.001516401 | 0.05000052  | 0.960292111 | 0.979774568 |
| 231554_at   | 0.033680266 | 0.804587256 | 0.424312068 | 0.605819276 |
| 231555_at   | 0.063140323 | 1.949617501 | 0.056014929 | 0.139427414 |
| 231556_at   | -0.0486699  | -1.26635475 | 0.210399779 | 0.375137115 |
| 231557_at   | 0.084492808 | 2.139593356 | 0.036565801 | 0.099652343 |
| 231558_at   | -0.07478681 | -1.9855728  | 0.051769118 | 0.131056158 |
| 231559_at   | 0.088491286 | 2.273896476 | 0.026653145 | 0.07750552  |
| 231560_at   | 0.025917899 | 1.110620495 | 0.27127075  | 0.447184994 |
| 231561_s_at | 0.035038794 | 0.987326461 | 0.327544179 | 0.509913768 |
| 231562_at   | -0.02532022 | -0.64808904 | 0.519460209 | 0.688710748 |
| 231563_at   | -0.02050679 | -0.64824621 | 0.519359283 | 0.688678052 |
| 231564_at   | -0.00360827 | -0.09331721 | 0.925970062 | 0.961221146 |
| 231565_at   | 0.301141603 | 2.447134335 | 0.017419362 | 0.055072246 |

|             |             |             |             |             |
|-------------|-------------|-------------|-------------|-------------|
| 231566_at   | -0.01563574 | -0.42251506 | 0.674196331 | 0.804171093 |
| 231567_s_at | 0.016540328 | 0.563732723 | 0.575088369 | 0.732643009 |
| 231568_at   | -0.01443907 | -0.32172516 | 0.748806402 | 0.855111808 |
| 231569_at   | -0.01746746 | -0.41836127 | 0.677213148 | 0.806362498 |
| 231570_at   | -0.04753714 | -1.36035984 | 0.178929127 | 0.334617982 |
| 231571_at   | -0.01005571 | -0.28014224 | 0.780355517 | 0.874448982 |
| 231572_at   | -0.05786    | -1.34936206 | 0.182414145 | 0.339268261 |
| 231573_at   | 0.013452074 | 0.429173518 | 0.669371627 | 0.80084478  |
| 231574_at   | -0.04396112 | -1.16502749 | 0.248731224 | 0.421071813 |
| 231575_at   | -0.0118515  | -0.38032565 | 0.705079598 | 0.826215632 |
| 231576_at   | -0.44170304 | -3.70077235 | 0.000476795 | 0.002752025 |
| 231577_s_at | 0.960764659 | 3.647108094 | 0.000565432 | 0.003178252 |
| 231578_at   | 0.181307531 | 2.667618999 | 0.009863249 | 0.034508245 |
| 231579_s_at | 0.421079686 | 3.961322341 | 0.000204717 | 0.001342511 |
| 231580_at   | 0.002629389 | 0.071960835 | 0.942878262 | 0.970522473 |
| 231581_at   | -0.0138869  | -0.4623452  | 0.645546902 | 0.784991215 |
| 231582_at   | -0.02602329 | -0.74624671 | 0.458503465 | 0.637151733 |
| 231583_at   | 0.061888141 | 1.842599964 | 0.070450807 | 0.166473908 |
| 231584_s_at | 0.021445558 | 0.544875654 | 0.587907987 | 0.742708081 |
| 231585_at   | -0.07011148 | -2.10898416 | 0.039232002 | 0.105199294 |
| 231586_at   | 0.012998939 | 0.446687311 | 0.656748267 | 0.792246502 |
| 231587_at   | -0.03247331 | -0.99863423 | 0.322080178 | 0.504005858 |
| 231588_at   | -0.00404343 | -0.13520322 | 0.892914819 | 0.94273917  |
| 231589_at   | -0.06352346 | -1.87714776 | 0.065481437 | 0.157531686 |
| 231590_at   | -0.01367438 | -0.37713388 | 0.707437242 | 0.827643747 |
| 231591_at   | 0.016570911 | 0.514412282 | 0.608899577 | 0.758274072 |
| 231592_at   | 0.020595031 | 0.598128475 | 0.552060338 | 0.714578224 |
| 231593_at   | -0.0539504  | -1.26050377 | 0.21248664  | 0.377667645 |
| 231594_at   | -0.01035514 | -0.22212453 | 0.824989707 | 0.902813601 |
| 231595_at   | -0.05604534 | -2.03830251 | 0.046043422 | 0.119693615 |
| 231596_at   | -0.0344341  | -0.85110326 | 0.398178541 | 0.580524414 |
| 231597_x_at | 0.079380132 | 1.38265597  | 0.172020047 | 0.325194364 |
| 231598_x_at | 0.007140857 | 0.199755984 | 0.842363393 | 0.913388633 |
| 231599_x_at | -0.21545822 | -5.51320119 | 8.32E-07    | 1.38E-05    |
| 231600_at   | -0.02531752 | -0.89553976 | 0.374164675 | 0.557267777 |
| 231601_at   | -0.05849248 | -1.578937   | 0.119736936 | 0.249093849 |
| 231602_at   | 0.084133997 | 2.349233077 | 0.022205236 | 0.067031165 |
| 231603_at   | -0.0486477  | -1.30784405 | 0.196036651 | 0.356714546 |
| 231604_at   | -0.03074854 | -1.0098998  | 0.316697579 | 0.49790158  |
| 231605_at   | 0.083895232 | 2.034932353 | 0.046392286 | 0.120355492 |
| 231606_at   | -0.01553593 | -0.39073539 | 0.697410582 | 0.820977561 |
| 231607_at   | -0.00501448 | -0.12865063 | 0.89807488  | 0.945420644 |
| 231608_at   | 0.011835297 | 0.411393623 | 0.682285545 | 0.810026896 |
| 231609_at   | -0.00118864 | -0.03198753 | 0.97459076  | 0.987265038 |
| 231610_at   | -0.10946675 | -3.31588101 | 0.001572298 | 0.007453225 |
| 231611_at   | -0.08470262 | -1.61318767 | 0.112079724 | 0.237171733 |
| 231612_at   | -0.07058621 | -2.28438885 | 0.025989717 | 0.076041404 |
| 231613_at   | -0.09633187 | -3.17064289 | 0.002420276 | 0.010690141 |
| 231614_at   | -0.05421043 | -2.33332516 | 0.023085136 | 0.069168737 |
| 231615_at   | -0.00539153 | -0.19456751 | 0.846404896 | 0.915588593 |
| 231616_at   | 0.006497489 | 0.169244534 | 0.866187512 | 0.927669597 |
| 231617_at   | -0.01934766 | -0.73635245 | 0.464455549 | 0.642188144 |
| 231618_s_at | -0.00963299 | -0.28280301 | 0.778324988 | 0.872933228 |
| 231619_at   | -0.08965887 | -2.03752653 | 0.046123547 | 0.119816673 |
| 231620_at   | -0.04604731 | -1.45124846 | 0.15204633  | 0.297092505 |
| 231621_at   | -0.05204562 | -1.49736919 | 0.139667654 | 0.279510425 |
| 231622_at   | -0.13431721 | -3.46841052 | 0.000988171 | 0.005047817 |
| 231623_at   | -0.04413217 | -1.32513534 | 0.19027299  | 0.349104353 |
| 231624_s_at | -0.02597818 | -0.81143339 | 0.420402422 | 0.602431225 |
| 231625_at   | -0.00693376 | -0.1605753  | 0.872980498 | 0.93157385  |
| 231626_at   | -0.01387805 | -0.4997957  | 0.619091588 | 0.766120483 |
| 231627_at   | -0.00809349 | -0.22254538 | 0.824663647 | 0.902688474 |
| 231628_s_at | -0.00721265 | -0.15947517 | 0.873843233 | 0.932160631 |
| 231629_x_at | 0.03594304  | 0.926367758 | 0.358056663 | 0.541055869 |
| 231630_at   | -0.01301724 | -0.51043149 | 0.611667754 | 0.760365355 |
| 231631_at   | 0.083662354 | 2.207139467 | 0.03123628  | 0.087943293 |
| 231632_at   | -0.02892829 | -0.96889963 | 0.336579653 | 0.519366704 |
| 231633_at   | -0.04687066 | -1.20790309 | 0.231939656 | 0.400347385 |
| 231634_at   | 0.009078362 | 0.27427604  | 0.78483762  | 0.877271913 |
| 231635_x_at | 0.025884186 | 0.538701576 | 0.592134588 | 0.745769369 |
| 231636_s_at | -0.00190166 | -0.04843611 | 0.961533483 | 0.980399124 |
| 231637_at   | 0.088860794 | 2.5849087   | 0.012252123 | 0.041164626 |
| 231638_at   | 0.015725216 | 0.48612071  | 0.628695589 | 0.772954341 |
| 231639_at   | -0.02543307 | -0.686683   | 0.494992484 | 0.668356196 |
| 231640_at   | -0.21219865 | -4.29696346 | 6.62E-05    | 0.000520345 |

|             |             |             |             |             |
|-------------|-------------|-------------|-------------|-------------|
| 231641_at   | -0.02638853 | -0.68830335 | 0.493979205 | 0.667581453 |
| 231642_at   | -0.0691485  | -2.0966193  | 0.040356147 | 0.107619603 |
| 231643_s_at | -0.09131459 | -2.63162825 | 0.010844991 | 0.037220423 |
| 231644_at   | 0.413884817 | 4.821239848 | 1.05E-05    | 0.000111372 |
| 231645_s_at | 0.023309346 | 0.936482793 | 0.35287039  | 0.536023747 |
| 231646_at   | -0.01199448 | -0.43107685 | 0.667995036 | 0.799932644 |
| 231647_s_at | -0.0451106  | -1.80785928 | 0.075764159 | 0.176008513 |
| 231648_at   | 0.020807746 | 0.868536532 | 0.388645971 | 0.571435904 |
| 231649_at   | -0.06278545 | -2.14813559 | 0.035850579 | 0.098097965 |
| 231650_s_at | -0.19030072 | -3.12450863 | 0.002769291 | 0.012010205 |
| 231651_at   | 0.038146824 | 0.86340243  | 0.3914384   | 0.574219293 |
| 231652_at   | 0.000257822 | 0.00739134  | 0.994127738 | 0.997274065 |
| 231653_at   | -0.04690333 | -1.34409736 | 0.184100607 | 0.341332684 |
| 231654_s_at | -0.03095039 | -0.86239698 | 0.391986722 | 0.574759533 |
| 231655_x_at | 0.047068106 | 2.124090058 | 0.037895748 | 0.102433579 |
| 231656_x_at | -0.00215719 | -0.05431479 | 0.956869227 | 0.977919037 |
| 231657_s_at | 0.01794861  | 0.526389208 | 0.600605723 | 0.752108022 |
| 231658_x_at | 0.027173954 | 0.734942549 | 0.465307282 | 0.643127046 |
| 231659_at   | -0.01977552 | -0.57218646 | 0.569385592 | 0.728264942 |
| 231660_at   | -0.02667602 | -1.17009947 | 0.246700531 | 0.418363062 |
| 231661_at   | -0.00898779 | -0.25604282 | 0.798814978 | 0.886019533 |
| 231662_at   | -0.0214312  | -0.59056388 | 0.557084794 | 0.719199075 |
| 231663_s_at | -0.02117068 | -0.66336052 | 0.509702451 | 0.68061854  |
| 231664_at   | -0.03380559 | -1.23208252 | 0.222842016 | 0.38996844  |
| 231665_at   | 0.0347729   | 1.49569352  | 0.140103037 | 0.280193534 |
| 231666_at   | 0.007652863 | 0.233403239 | 0.816262179 | 0.897272039 |
| 231667_at   | -0.02698778 | -0.68889552 | 0.493609185 | 0.667233045 |
| 231668_x_at | -0.08331391 | -1.64804659 | 0.104698266 | 0.225458944 |
| 231669_at   | -0.02407093 | -0.52940048 | 0.598528725 | 0.750550078 |
| 231670_at   | -0.05348188 | -1.67002316 | 0.100251623 | 0.217991048 |
| 231671_at   | -0.03577836 | -0.96534324 | 0.338342267 | 0.521079038 |
| 231672_at   | -0.00974886 | -0.31766011 | 0.751872599 | 0.857266523 |
| 231673_at   | -0.0668112  | -1.68459187 | 0.09738987  | 0.213276842 |
| 231674_at   | -0.02706899 | -0.83555812 | 0.406799433 | 0.589153254 |
| 231675_s_at | 0.003722962 | 0.126701623 | 0.899610558 | 0.946244733 |
| 231676_s_at | 0.035252015 | 1.500724901 | 0.138798969 | 0.278290965 |
| 231677_at   | -0.09173293 | -2.37442647 | 0.020872849 | 0.063754057 |
| 231678_s_at | 0.035080548 | 1.15113344  | 0.25435538  | 0.427564247 |
| 231679_at   | -0.06528291 | -2.92347054 | 0.004914205 | 0.019447229 |
| 231680_at   | -0.02616712 | -1.19383897 | 0.237354245 | 0.406804568 |
| 231681_x_at | 0.039481979 | 1.250298652 | 0.216163117 | 0.382172013 |
| 231682_at   | 0.052373112 | 1.892207216 | 0.063409886 | 0.153566416 |
| 231683_at   | -0.0573096  | -1.79131165 | 0.078410631 | 0.180765908 |
| 231684_at   | 0.016692381 | 0.60744462  | 0.545904014 | 0.709973874 |
| 231685_at   | 0.035716135 | 0.877701481 | 0.383692192 | 0.56636957  |
| 231686_at   | 0.045582583 | 1.21290674  | 0.230035141 | 0.397980209 |
| 231687_at   | 0.00436438  | 0.134785897 | 0.893243314 | 0.942930066 |
| 231688_at   | 0.053983406 | 1.268843283 | 0.209516821 | 0.374025396 |
| 231689_at   | -0.01241164 | -0.41043831 | 0.682982159 | 0.810511296 |
| 231690_at   | 0.015403007 | 0.613291282 | 0.542058316 | 0.707009201 |
| 231691_at   | 0.0085321   | 0.240969559 | 0.810420317 | 0.893563593 |
| 231692_at   | 0.079051739 | 2.383740848 | 0.020398636 | 0.062557871 |
| 231693_at   | -0.05138371 | -1.29262823 | 0.201216198 | 0.363372972 |
| 231694_at   | 0.034937002 | 0.995021719 | 0.323819099 | 0.505841426 |
| 231695_at   | 0.064401666 | 1.425392676 | 0.159351735 | 0.307435689 |
| 231696_x_at | 0.079036813 | 2.37133804  | 0.021032249 | 0.064144484 |
| 231697_s_at | -0.00287744 | -0.10821342 | 0.914196286 | 0.954254927 |
| 231698_at   | -0.06669474 | -2.00536829 | 0.049551659 | 0.12659597  |
| 231699_at   | 0.003110716 | 0.087623541 | 0.93047481  | 0.96375731  |
| 231700_at   | -0.00800353 | -0.27551944 | 0.783886975 | 0.876582012 |
| 231701_s_at | -0.07074593 | -2.27612667 | 0.026510888 | 0.07722051  |
| 231702_at   | 0.001883088 | 0.061035638 | 0.951538639 | 0.975128584 |
| 231703_s_at | -0.0481593  | -1.38568784 | 0.171096566 | 0.323979583 |
| 231704_at   | 0.019890104 | 0.496632061 | 0.621307581 | 0.76744329  |
| 231705_at   | -0.02102678 | -0.57651191 | 0.566478444 | 0.726654176 |
| 231706_s_at | 0.022388265 | 0.593044106 | 0.555434897 | 0.717732505 |
| 231707_at   | -0.04513374 | -1.20462734 | 0.233192691 | 0.401860405 |
| 231708_at   | -0.05953056 | -1.88925503 | 0.06381155  | 0.154392031 |
| 231709_x_at | -0.01534776 | -0.70096894 | 0.486098233 | 0.660807721 |
| 231710_at   | 0.141082096 | 2.627579369 | 0.010960838 | 0.037543055 |
| 231711_at   | -0.02717554 | -0.8339618  | 0.40769113  | 0.589926565 |
| 231712_at   | -0.03066794 | -0.86543655 | 0.390330557 | 0.573168227 |
| 231713_s_at | 0.097292854 | 2.322745379 | 0.023687391 | 0.070679456 |
| 231714_s_at | -0.07533438 | -1.9064495  | 0.061502115 | 0.14992105  |
| 231715_s_at | -0.06094486 | -1.27292359 | 0.208075048 | 0.372090671 |

|             |             |             |             |             |
|-------------|-------------|-------------|-------------|-------------|
| 231716_at   | -0.03728089 | -0.790519   | 0.432414191 | 0.61327288  |
| 231717_s_at | 0.02531664  | 1.046905358 | 0.299444734 | 0.478760207 |
| 231718_at   | 0.005658716 | 0.098389354 | 0.921959104 | 0.95910701  |
| 231719_at   | -0.03198704 | -1.03273246 | 0.305974975 | 0.486053658 |
| 231720_s_at | -0.10409133 | -0.98932603 | 0.326573503 | 0.508792547 |
| 231721_at   | -0.30702518 | -2.10834099 | 0.039289796 | 0.105328988 |
| 231722_at   | -0.05101515 | -1.22008466 | 0.227323004 | 0.394880498 |
| 231723_at   | 0.02462749  | 0.653371231 | 0.516073983 | 0.686084458 |
| 231724_at   | 0.041984441 | 0.984447575 | 0.32894508  | 0.511412165 |
| 231725_at   | -0.03727161 | -1.15062053 | 0.254564725 | 0.427803515 |
| 231726_at   | -0.11841574 | -1.51996546 | 0.133900336 | 0.270977388 |
| 231727_s_at | 0.020339514 | 0.483217742 | 0.630742752 | 0.774443992 |
| 231728_at   | 0.55417841  | 3.272108206 | 0.001792625 | 0.008321146 |
| 231729_s_at | 0.811940808 | 3.773150184 | 0.000378084 | 0.002259906 |
| 231730_at   | 0.000315738 | 0.008265003 | 0.993433646 | 0.997070145 |
| 231731_at   | 0.016827284 | 0.532975219 | 0.596067432 | 0.748740709 |
| 231732_at   | -0.12102246 | -2.55266564 | 0.013317921 | 0.044076165 |
| 231733_at   | -0.0336273  | -1.13192671 | 0.26227862  | 0.436759672 |
| 231734_at   | -0.01345074 | -0.48260567 | 0.631174758 | 0.774744913 |
| 231735_s_at | 0.104126656 | 0.813477507 | 0.419239303 | 0.601549316 |
| 231736_x_at | 0.169632915 | 1.310327209 | 0.195200966 | 0.355527002 |
| 231737_at   | -0.32765928 | -6.56065507 | 1.54E-08    | 6.12E-07    |
| 231738_at   | 0.117214628 | 2.232620456 | 0.029410825 | 0.083764044 |
| 231739_at   | -0.62774378 | -5.73632117 | 3.60E-07    | 6.93E-06    |
| 231740_at   | -0.13635895 | -2.8021041  | 0.006871513 | 0.025647375 |
| 231741_at   | -0.03641315 | -0.91759252 | 0.362595632 | 0.545747406 |
| 231742_at   | -0.01032083 | -0.27089176 | 0.787426746 | 0.878693536 |
| 231743_at   | -0.02335658 | -0.6708479  | 0.504954564 | 0.676767971 |
| 231744_at   | -0.43288642 | -8.0623249  | 4.51E-11    | 1.37E-08    |
| 231745_at   | -0.01475043 | -0.41882985 | 0.676872562 | 0.806128778 |
| 231746_at   | 0.011426839 | 0.314319068 | 0.754395697 | 0.858777045 |
| 231747_at   | -0.03438512 | -0.7797175  | 0.438696856 | 0.61911923  |
| 231748_at   | -0.01688198 | -0.49516988 | 0.622332972 | 0.768005113 |
| 231749_at   | -0.03382559 | -1.04842326 | 0.29875105  | 0.477924685 |
| 231750_at   | 0.023021623 | 0.575728081 | 0.567004714 | 0.726861563 |
| 231751_at   | 0.000163818 | 0.005527805 | 0.995608258 | 0.997917707 |
| 231752_at   | -0.01433532 | -0.32240106 | 0.748296977 | 0.854879563 |
| 231753_s_at | -0.02818791 | -0.82044561 | 0.415289007 | 0.597517748 |
| 231754_at   | 0.025138513 | 0.793959879 | 0.430424092 | 0.611284551 |
| 231755_at   | -0.04169971 | -1.13285816 | 0.261890382 | 0.436373312 |
| 231756_at   | -0.00366195 | -0.10336895 | 0.91802331  | 0.956615864 |
| 231757_at   | 0.092501967 | 1.737378732 | 0.087576912 | 0.196930182 |
| 231758_at   | -0.04579654 | -1.25099801 | 0.215909679 | 0.381882828 |
| 231759_at   | 0.028994272 | 0.900858499 | 0.371353203 | 0.554557861 |
| 231760_at   | -0.01033794 | -0.34368117 | 0.732316876 | 0.843803423 |
| 231761_at   | 0.072957693 | 2.203481001 | 0.031506399 | 0.08855874  |
| 231762_at   | -0.04914588 | -1.4708131  | 0.146694344 | 0.289489275 |
| 231763_at   | -0.04333864 | -1.26913319 | 0.209414138 | 0.373886891 |
| 231764_at   | 0.133709669 | 3.428849985 | 0.001115891 | 0.005580329 |
| 231765_at   | -0.03130752 | -0.86064287 | 0.392944469 | 0.575710536 |
| 231766_s_at | 0.027340332 | 0.801546484 | 0.426055543 | 0.607396546 |
| 231767_at   | -0.0667754  | -2.60590341 | 0.011600433 | 0.039380084 |
| 231768_at   | -0.0064404  | -0.17987162 | 0.857874262 | 0.922480066 |
| 231769_at   | -0.13237857 | -2.36583852 | 0.021318785 | 0.064881112 |
| 231770_x_at | 0.17086478  | 3.835625447 | 0.000308915 | 0.001907966 |
| 231771_at   | -0.33964248 | -1.87342687 | 0.066002005 | 0.158441912 |
| 231772_x_at | -0.05014872 | -1.56401024 | 0.123202991 | 0.254633188 |
| 231773_at   | 0.027919023 | 0.545659428 | 0.587372463 | 0.742220372 |
| 231774_at   | -0.03735119 | -1.15322115 | 0.253504549 | 0.426454823 |
| 231775_at   | 0.137924966 | 3.112192455 | 0.002870144 | 0.012367189 |
| 231776_at   | 0.051716956 | 1.854835484 | 0.068655702 | 0.163323608 |
| 231777_at   | 0.029828274 | 0.790938828 | 0.432171085 | 0.613025363 |
| 231778_at   | 0.017200928 | 0.569115126 | 0.571454266 | 0.729843975 |
| 231779_at   | 0.116772761 | 3.433873595 | 0.001098845 | 0.005507412 |
| 231780_at   | 0.019451305 | 0.576863644 | 0.566242363 | 0.726551167 |
| 231781_s_at | 0.027328442 | 1.063837817 | 0.291768881 | 0.470205352 |
| 231782_s_at | -0.02507406 | -0.84762863 | 0.400095613 | 0.582540256 |
| 231783_at   | -0.9239952  | -6.57278517 | 1.47E-08    | 5.94E-07    |
| 231784_s_at | 0.017040624 | 0.271805551 | 0.786727414 | 0.878329835 |
| 231785_at   | 0.002925896 | 0.078105708 | 0.93801021  | 0.96750215  |
| 231786_at   | 0.061776269 | 1.885055041 | 0.064386698 | 0.155468707 |
| 231787_at   | -0.27222799 | -4.18847786 | 9.58E-05    | 0.000710276 |
| 231788_at   | -0.00268998 | -0.07418572 | 0.941115417 | 0.969355386 |
| 231789_at   | 0.023129834 | 0.572701902 | 0.569038776 | 0.728028197 |
| 231790_at   | -0.0358406  | -1.38529762 | 0.171215209 | 0.324111572 |

|             |             |             |             |             |
|-------------|-------------|-------------|-------------|-------------|
| 231791_at   | -0.19323055 | -4.99222016 | 5.68E-06    | 6.68E-05    |
| 231792_at   | 0.033022469 | 1.025514187 | 0.309337794 | 0.489915471 |
| 231793_s_at | 0.103751372 | 1.420203045 | 0.160850343 | 0.309511906 |
| 231794_at   | -0.0042498  | -0.11051118 | 0.912381815 | 0.953694641 |
| 231795_at   | -0.00704705 | -0.16985423 | 0.865710144 | 0.927451969 |
| 231796_at   | -0.08961655 | -2.70889455 | 0.008837748 | 0.031550176 |
| 231797_at   | -0.04313573 | -1.98897402 | 0.051382166 | 0.130246256 |
| 231798_at   | -0.26580247 | -4.6252626  | 2.11E-05    | 0.000200205 |
| 231799_at   | -0.10536448 | -3.47800475 | 0.000959357 | 0.004926531 |
| 231800_s_at | 0.070368437 | 3.004353179 | 0.003912045 | 0.016094736 |
| 231801_at   | -0.01352776 | -0.38034989 | 0.705061708 | 0.826215632 |
| 231802_at   | -0.08480737 | -2.07618531 | 0.04227533  | 0.11176392  |
| 231803_at   | -0.03475627 | -0.76445788 | 0.447663666 | 0.627276518 |
| 231804_at   | -0.18987593 | -4.55691872 | 2.69E-05    | 0.000244925 |
| 231805_at   | 0.032521299 | 0.882930787 | 0.380883529 | 0.563694505 |
| 231806_s_at | 0.107966226 | 1.950757695 | 0.055875854 | 0.13918977  |
| 231807_at   | -0.26793699 | -4.46467397 | 3.71E-05    | 0.000321408 |
| 231808_at   | -0.11874017 | -2.276803   | 0.02646788  | 0.077119134 |
| 231809_x_at | 0.250711227 | 4.417798767 | 4.37E-05    | 0.000367403 |
| 231810_at   | -0.13978466 | -2.27935915 | 0.026305893 | 0.076765458 |
| 231811_at   | -0.00796009 | -0.2167983  | 0.829118975 | 0.905188868 |
| 231812_x_at | -0.03896901 | -1.26867582 | 0.209576153 | 0.374101427 |
| 231813_s_at | -0.14748361 | -4.96902887 | 6.18E-06    | 7.17E-05    |
| 231814_at   | -0.05583923 | -1.35793503 | 0.179693113 | 0.335653456 |
| 231815_at   | 0.177624087 | 3.495478515 | 0.000908918 | 0.004707539 |
| 231816_s_at | -0.01423735 | -0.38915858 | 0.698570237 | 0.821614289 |
| 231817_at   | 0.238217723 | 2.470825008 | 0.016410523 | 0.052360899 |
| 231818_x_at | 0.126027002 | 2.828625947 | 0.006390725 | 0.024130979 |
| 231819_at   | -0.14557754 | -2.34775569 | 0.022285674 | 0.067214965 |
| 231820_x_at | 0.005195939 | 0.148672162 | 0.882323062 | 0.937050569 |
| 231821_x_at | 0.187462709 | 3.268511463 | 0.001811968 | 0.008396979 |
| 231822_at   | -0.15918707 | -3.32113016 | 0.001547664 | 0.007354405 |
| 231823_s_at | 0.222662729 | 4.480430953 | 3.51E-05    | 0.000307282 |
| 231824_at   | -0.11653104 | -3.39704515 | 0.001229767 | 0.006062294 |
| 231825_x_at | 0.199104485 | 5.032143575 | 4.91E-06    | 5.94E-05    |
| 231826_at   | -0.00189337 | -0.05731796 | 0.954487029 | 0.976618516 |
| 231827_at   | 0.072834049 | 2.003867812 | 0.049716831 | 0.126910246 |
| 231828_at   | -0.01304208 | -0.10644551 | 0.915592664 | 0.955107423 |
| 231829_at   | 0.232914009 | 3.697144382 | 0.000482342 | 0.002778302 |
| 231830_x_at | 0.066584994 | 1.858605044 | 0.068110489 | 0.162355003 |
| 231831_at   | 0.080315656 | 2.665970477 | 0.00990638  | 0.034618495 |
| 231832_at   | 0.347436509 | 4.86380062  | 9.03E-06    | 9.82E-05    |
| 231833_at   | 0.03705451  | 0.805694629 | 0.423678203 | 0.605242967 |
| 231834_at   | -0.00039684 | -0.01476986 | 0.988265987 | 0.994563794 |
| 231835_at   | -0.16557646 | -3.54095798 | 0.000789189 | 0.004184458 |
| 231836_at   | 0.092464912 | 2.425396859 | 0.018393733 | 0.057574779 |
| 231837_at   | -0.0058454  | -0.21372901 | 0.831500716 | 0.90684013  |
| 231838_at   | 0.117930796 | 2.554070275 | 0.013269793 | 0.043941889 |
| 231839_at   | -0.06653284 | -2.04155092 | 0.045709307 | 0.118984236 |
| 231840_x_at | 0.022240964 | 0.380209294 | 0.705165497 | 0.826239583 |
| 231841_s_at | -0.40584942 | -5.06253098 | 4.40E-06    | 5.43E-05    |
| 231842_at   | -0.25211447 | -4.01743475 | 0.000170017 | 0.001148662 |
| 231843_at   | -0.06730259 | -1.34147181 | 0.184946075 | 0.342346338 |
| 231844_at   | 0.19425342  | 6.836966962 | 5.27E-09    | 2.87E-07    |
| 231845_at   | 0.038881679 | 1.222318538 | 0.226483736 | 0.393990546 |
| 231846_at   | 0.027519651 | 0.844142027 | 0.402025    | 0.58428348  |
| 231847_at   | 0.101444362 | 2.286690031 | 0.025846188 | 0.075695796 |
| 231848_x_at | 0.257342222 | 4.255978957 | 7.62E-05    | 0.000587106 |
| 231849_at   | 0.064303274 | 2.440388616 | 0.01771665  | 0.055819    |
| 231850_x_at | 0.168474039 | 3.09041233  | 0.003056959 | 0.013050112 |
| 231851_at   | 0.143129954 | 2.031313243 | 0.046769461 | 0.121094997 |
| 231852_at   | -0.02701178 | -0.904883   | 0.369234822 | 0.552455395 |
| 231853_at   | 0.140354857 | 2.428641659 | 0.018245246 | 0.057210169 |
| 231854_at   | -0.03214556 | -0.88299517 | 0.380849027 | 0.563662109 |
| 231855_at   | -0.15254058 | -3.41536864 | 0.001162883 | 0.005776807 |
| 231856_at   | -0.17343597 | -1.76340244 | 0.083048819 | 0.188905631 |
| 231857_s_at | -0.12175398 | -2.80007043 | 0.006909723 | 0.025764168 |
| 231858_x_at | 0.066988357 | 2.10852149  | 0.039273569 | 0.105298118 |
| 231859_at   | -0.01406365 | -0.25972031 | 0.795990368 | 0.884152975 |
| 231860_at   | 0.07594417  | 1.118088263 | 0.268094681 | 0.443446926 |
| 231861_at   | 0.294016056 | 6.369342362 | 3.21E-08    | 1.05E-06    |
| 231862_at   | 0.022237653 | 0.315244338 | 0.753696678 | 0.858324927 |
| 231863_at   | 0.142381223 | 2.979384348 | 0.004199042 | 0.017086734 |
| 231864_at   | 0.14309642  | 2.600081128 | 0.011777925 | 0.039843996 |
| 231865_at   | 0.022820823 | 0.655727229 | 0.514567432 | 0.685033353 |



|             |             |             |             |             |
|-------------|-------------|-------------|-------------|-------------|
| 231866_at   | 0.240292921 | 3.299931187 | 0.00164944  | 0.007766202 |
| 231867_at   | -0.6882207  | -5.73351853 | 3.64E-07    | 6.99E-06    |
| 231868_at   | -0.0240577  | -0.67563504 | 0.501931524 | 0.674149471 |
| 231869_at   | -0.05553267 | -1.51129112 | 0.13609157  | 0.274254084 |
| 231870_s_at | 0.29533619  | 3.936613488 | 0.000222075 | 0.001442375 |
| 231871_at   | 0.015587922 | 0.372839616 | 0.710613798 | 0.829968688 |
| 231872_at   | 0.099100715 | 2.183518479 | 0.033016802 | 0.091971262 |
| 231873_at   | -0.39085004 | -4.53183115 | 2.94E-05    | 0.000263481 |
| 231874_at   | -0.33402882 | -3.13556023 | 0.002681629 | 0.011689003 |
| 231875_at   | 0.057284709 | 1.134666751 | 0.261137711 | 0.435476364 |
| 231876_at   | 0.473155503 | 7.542358034 | 3.40E-10    | 4.61E-08    |
| 231877_at   | -0.00684913 | -0.28421496 | 0.777248111 | 0.872311137 |
| 231878_at   | 0.194718532 | 3.851616735 | 0.000293268 | 0.001826465 |
| 231879_at   | 0.005081327 | 0.183562885 | 0.85499043  | 0.920686603 |
| 231880_at   | -1.08028287 | -7.44705543 | 4.92E-10    | 5.76E-08    |
| 231881_at   | -0.03728513 | -0.89799782 | 0.372863676 | 0.555967818 |
| 231882_at   | 0.036674138 | 1.212857528 | 0.230053817 | 0.397985801 |
| 231883_at   | -0.02031088 | -0.81325735 | 0.419364482 | 0.601599712 |
| 231884_at   | -0.04368216 | -0.90485282 | 0.369250678 | 0.552460624 |
| 231885_at   | -0.02733088 | -1.2235456  | 0.226023695 | 0.393511919 |
| 231886_at   | 0.10785089  | 1.766759344 | 0.082479144 | 0.187877569 |
| 231887_s_at | 0.236801168 | 4.196571149 | 9.32E-05    | 0.000694064 |
| 231888_at   | -0.03748296 | -1.05528077 | 0.295630866 | 0.474598034 |
| 231889_at   | 0.026832657 | 0.912580231 | 0.365204739 | 0.54851896  |
| 231890_at   | 0.194511114 | 3.889629343 | 0.000259069 | 0.001642079 |
| 231891_at   | -0.0092282  | -0.27165855 | 0.786839903 | 0.878367652 |
| 231892_at   | -0.06882942 | -1.99407382 | 0.050806621 | 0.129109542 |
| 231893_at   | 0.018313423 | 0.573514351 | 0.568492333 | 0.727745901 |
| 231894_at   | -0.08572062 | -1.60486835 | 0.113902219 | 0.240071707 |
| 231895_at   | 0.08736476  | 3.227698481 | 0.002045682 | 0.009280847 |
| 231896_s_at | -0.18444265 | -2.3096287  | 0.024453447 | 0.072451815 |
| 231897_at   | -0.23747653 | -2.27940903 | 0.026302741 | 0.076762876 |
| 231898_x_at | 0.324033649 | 2.600305892 | 0.011771028 | 0.039823677 |
| 231899_at   | 0.38071774  | 5.315710596 | 1.73E-06    | 2.52E-05    |
| 231900_at   | -0.02696931 | -0.66060503 | 0.511455776 | 0.682205621 |
| 231901_at   | -0.00678306 | -0.20797212 | 0.835972268 | 0.909491133 |
| 231902_at   | -0.06931044 | -2.16636325 | 0.034365219 | 0.094887579 |
| 231903_x_at | -0.00638943 | -0.12039811 | 0.90457988  | 0.949437489 |
| 231904_at   | 0.129200757 | 3.204086056 | 0.002193561 | 0.009856691 |
| 231905_at   | 0.066637843 | 1.563274059 | 0.123375993 | 0.254896445 |
| 231906_at   | 0.042442203 | 0.980984054 | 0.330635744 | 0.51306457  |
| 231907_at   | -0.19378126 | -3.29785586 | 0.001659737 | 0.007798249 |
| 231908_at   | -0.18996223 | -3.99276459 | 0.000184511 | 0.001231874 |
| 231909_x_at | 0.006076344 | 0.154803603 | 0.877508419 | 0.934486769 |
| 231910_at   | -0.01373476 | -0.3341588  | 0.739453384 | 0.848899322 |
| 231911_at   | 0.329614209 | 2.530128272 | 0.01411208  | 0.04617447  |
| 231912_s_at | -0.16198076 | -3.4896267  | 0.000925522 | 0.004779137 |
| 231913_s_at | -0.15158255 | -3.54095659 | 0.000789192 | 0.004184458 |
| 231914_at   | -0.11342724 | -2.13876638 | 0.036635699 | 0.099775908 |
| 231915_at   | -0.05766034 | -1.15635836 | 0.252229833 | 0.425168114 |
| 231916_at   | -0.57235617 | -5.65059442 | 4.97E-07    | 9.00E-06    |
| 231917_at   | -0.19906133 | -5.13916457 | 3.32E-06    | 4.30E-05    |
| 231918_s_at | -0.26659361 | -3.72467945 | 0.000441738 | 0.002577979 |
| 231919_at   | -0.06080299 | -1.06564242 | 0.290958885 | 0.469351366 |
| 231920_s_at | -0.05607215 | -1.84245163 | 0.070472809 | 0.166473908 |
| 231921_at   | -0.11445488 | -2.19271869 | 0.032312971 | 0.090393797 |
| 231922_at   | 0.064156377 | 2.035185337 | 0.04636602  | 0.120308299 |
| 231923_at   | 0.135838967 | 3.801315784 | 0.000345237 | 0.002092115 |
| 231924_at   | 0.054886269 | 2.055476777 | 0.044300606 | 0.11604048  |
| 231925_at   | 0.187837543 | 1.477809895 | 0.144816623 | 0.286873123 |
| 231926_at   | -0.01869474 | -0.53482348 | 0.594796719 | 0.747813085 |
| 231927_at   | 0.06386687  | 1.336606141 | 0.18652068  | 0.344348241 |
| 231928_at   | -0.00769217 | -0.31327605 | 0.755183924 | 0.859320703 |
| 231929_at   | 0.434590008 | 5.319347347 | 1.71E-06    | 2.50E-05    |
| 231930_at   | -1.22290259 | -6.74199689 | 7.62E-09    | 3.68E-07    |
| 231931_at   | 0.004954706 | 0.114840108 | 0.908964679 | 0.951836956 |
| 231932_at   | -0.03373613 | -1.29931453 | 0.198927665 | 0.360419157 |
| 231933_at   | 0.027114691 | 0.651907679 | 0.517011036 | 0.686623595 |
| 231934_at   | -0.01008913 | -0.31456722 | 0.754208204 | 0.858693432 |
| 231935_at   | -0.67141106 | -6.18776532 | 6.45E-08    | 1.79E-06    |
| 231936_at   | -0.00265088 | -0.08757246 | 0.930515232 | 0.96375731  |
| 231937_at   | -0.00811236 | -0.21396881 | 0.831314574 | 0.906682064 |
| 231938_at   | 0.012948488 | 0.429298397 | 0.669281273 | 0.800779553 |
| 231939_s_at | -0.00372723 | -0.10838566 | 0.914060261 | 0.954246988 |
| 231940_at   | -0.17233732 | -3.0237647  | 0.003701665 | 0.015357853 |

|             |             |             |             |             |
|-------------|-------------|-------------|-------------|-------------|
| 231941_s_at | -0.30511672 | -3.30294344 | 0.001634603 | 0.007706084 |
| 231942_at   | -0.05921939 | -1.86794169 | 0.066775781 | 0.159898371 |
| 231943_at   | -0.03311155 | -0.968222   | 0.336915035 | 0.519704785 |
| 231944_at   | -0.06633018 | -1.44762226 | 0.153054841 | 0.298534759 |
| 231945_at   | -0.0712841  | -1.79038977 | 0.07856031  | 0.180989606 |
| 231946_at   | 0.047354138 | 1.350752409 | 0.181970735 | 0.338662285 |
| 231947_at   | -0.03102274 | -0.70058938 | 0.486333389 | 0.660978137 |
| 231948_s_at | 0.078852169 | 1.47239103  | 0.146269218 | 0.288931    |
| 231949_at   | 0.061932939 | 1.551647103 | 0.126134212 | 0.259388124 |
| 231950_at   | -0.0816624  | -1.64251936 | 0.105841554 | 0.227242061 |
| 231951_at   | 0.204362521 | 5.303422297 | 1.82E-06    | 2.62E-05    |
| 231952_at   | 0.170704539 | 4.380566545 | 4.97E-05    | 0.000409345 |
| 231953_at   | 0.216898339 | 3.426871452 | 0.001122673 | 0.005609185 |
| 231954_at   | 0.075679461 | 1.852910066 | 0.068935602 | 0.163824488 |
| 231955_s_at | -0.06187601 | -1.10344202 | 0.274348619 | 0.450613322 |
| 231956_at   | 0.301920922 | 3.824998623 | 0.000319754 | 0.001963512 |
| 231957_s_at | -0.03528389 | -1.03212955 | 0.306254903 | 0.486360036 |
| 231958_at   | -0.00721874 | -0.19414576 | 0.846733596 | 0.915775411 |
| 231959_at   | -0.05124019 | -1.48937362 | 0.141754749 | 0.282523333 |
| 231960_at   | 0.203005522 | 4.824838039 | 1.04E-05    | 0.000110179 |
| 231961_at   | 0.055893048 | 1.463378586 | 0.148710412 | 0.292499153 |
| 231962_at   | -0.08060426 | -3.03869395 | 0.003547091 | 0.014800355 |
| 231963_at   | -0.38626542 | -6.55864913 | 1.55E-08    | 6.16E-07    |
| 231964_at   | -0.05261075 | -0.74850464 | 0.457151333 | 0.636041786 |
| 231965_at   | 0.089998552 | 2.120946739 | 0.038170486 | 0.103026654 |
| 231966_at   | -0.13662607 | -3.55918128 | 0.00074556  | 0.004002473 |
| 231967_at   | -0.51160477 | -6.67762809 | 9.78E-09    | 4.39E-07    |
| 231968_at   | -0.01237513 | -0.33983646 | 0.735195463 | 0.845945152 |
| 231969_at   | 0.013572819 | 0.174067994 | 0.862412324 | 0.92515618  |
| 231970_at   | 0.187262575 | 4.718797371 | 1.52E-05    | 0.000151393 |
| 231971_at   | -0.02995135 | -1.01161725 | 0.315882344 | 0.497188739 |
| 231972_at   | -0.87221633 | -6.14330905 | 7.65E-08    | 2.05E-06    |
| 231973_s_at | -0.0153358  | -0.26270416 | 0.79370054  | 0.882549964 |
| 231974_at   | -0.02664277 | -0.7236496  | 0.472161471 | 0.648429476 |
| 231975_s_at | 0.164996386 | 2.613257329 | 0.011379729 | 0.038743264 |
| 231976_at   | -0.0663093  | -1.53577556 | 0.129978626 | 0.26520292  |
| 231977_at   | -0.19924145 | -4.18100619 | 9.83E-05    | 0.000726176 |
| 231978_at   | -0.18588275 | -4.42885667 | 4.20E-05    | 0.000356335 |
| 231979_at   | 0.194341891 | 1.876165022 | 0.065618588 | 0.157766594 |
| 231980_at   | -1.13978067 | -7.01827361 | 2.61E-09    | 1.75E-07    |
| 231981_at   | -0.07013164 | -1.90427068 | 0.061790774 | 0.150500929 |
| 231982_at   | -0.02925175 | -0.77525227 | 0.441309683 | 0.621608382 |
| 231983_at   | 0.00455095  | 0.120621394 | 0.904403792 | 0.949334321 |
| 231984_at   | 0.047074865 | 0.997553541 | 0.322599722 | 0.504553867 |
| 231985_at   | -0.08731296 | -1.83686769 | 0.071305296 | 0.168002225 |
| 231986_at   | -0.63900046 | -6.72269521 | 8.21E-09    | 3.88E-07    |
| 231987_at   | 0.006301385 | 0.174976682 | 0.861701477 | 0.924708845 |
| 231988_x_at | -0.03400372 | -1.00041538 | 0.321225103 | 0.503090563 |
| 231989_s_at | 0.032099149 | 0.365657401 | 0.715938147 | 0.833594926 |
| 231990_at   | -0.0325364  | -0.81555655 | 0.418058306 | 0.600477642 |
| 231991_at   | 0.092271568 | 1.964653589 | 0.054204475 | 0.135889996 |
| 231992_x_at | 0.144134851 | 4.239701935 | 8.05E-05    | 0.000613807 |
| 231993_at   | -0.04264279 | -1.68597401 | 0.097121889 | 0.212868458 |
| 231994_at   | 0.106994401 | 2.515402951 | 0.014653864 | 0.047647181 |
| 231995_at   | 0.010135035 | 0.235596296 | 0.814567853 | 0.896136926 |
| 231996_at   | 0.043813517 | 1.232163403 | 0.222812029 | 0.389955952 |
| 231997_at   | -0.00473849 | -0.11416476 | 0.909497672 | 0.952216599 |
| 231998_at   | 0.062747465 | 1.60852665  | 0.113097877 | 0.238754345 |
| 231999_at   | -0.00060188 | -0.01366622 | 0.989142725 | 0.9949255   |
| 232000_at   | -0.11799304 | -2.92412379 | 0.004905233 | 0.019417599 |
| 232001_at   | 0.112143937 | 2.709983943 | 0.008812056 | 0.031471025 |
| 232002_at   | 0.136034748 | 2.659330235 | 0.010081863 | 0.035127359 |
| 232003_at   | -0.24599655 | -3.89618129 | 0.000253575 | 0.001611603 |
| 232004_at   | 0.060580891 | 1.467738965 | 0.147525363 | 0.290808201 |
| 232005_at   | 0.022798268 | 0.379235442 | 0.705884571 | 0.826648671 |
| 232006_at   | -0.00093295 | -0.0269785  | 0.978568601 | 0.989059649 |
| 232007_at   | 0.162777398 | 2.978080882 | 0.00421455  | 0.017130341 |
| 232008_s_at | 0.279043845 | 5.372092211 | 1.41E-06    | 2.11E-05    |
| 232009_at   | 0.047823815 | 1.505167188 | 0.137655575 | 0.27657359  |
| 232010_at   | -0.09957154 | -1.28893416 | 0.202488992 | 0.365037233 |
| 232011_s_at | -0.09200302 | -1.50681682 | 0.13723288  | 0.275984875 |
| 232012_at   | 0.090968333 | 3.53498109  | 0.00080402  | 0.004246929 |
| 232013_at   | 0.043268199 | 1.405855669 | 0.165050275 | 0.315569065 |
| 232014_at   | -0.06941216 | -1.50957105 | 0.136529435 | 0.274842283 |
| 232015_at   | 0.176091923 | 2.646376414 | 0.010432392 | 0.036073073 |

|             |             |             |             |             |
|-------------|-------------|-------------|-------------|-------------|
| 232016_at   | 0.061791242 | 2.089402639 | 0.04102511  | 0.109117076 |
| 232017_at   | 0.408813303 | 4.967877279 | 6.20E-06    | 7.19E-05    |
| 232018_at   | 0.049420292 | 1.023980482 | 0.310055524 | 0.490664519 |
| 232019_at   | -0.01044435 | -0.45247912 | 0.652595507 | 0.789352848 |
| 232020_at   | -0.01939975 | -0.40631731 | 0.685990373 | 0.812462747 |
| 232021_at   | 0.121254716 | 2.76027477  | 0.007697922 | 0.028158089 |
| 232022_at   | -0.00264661 | -0.07643468 | 0.939333795 | 0.968323706 |
| 232023_at   | 0.080999092 | 0.607082728 | 0.546142508 | 0.710160051 |
| 232024_at   | 0.096949205 | 1.154193613 | 0.253108926 | 0.42604155  |
| 232025_at   | -0.11446309 | -3.31416739 | 0.001580419 | 0.007483799 |
| 232026_at   | 0.046638288 | 1.752157842 | 0.084980924 | 0.192399122 |
| 232027_at   | -0.65245919 | -6.23229984 | 5.44E-08    | 1.57E-06    |
| 232028_at   | 0.185823569 | 1.627270218 | 0.109048516 | 0.232402429 |
| 232029_at   | 0.015988397 | 0.484016264 | 0.630179346 | 0.774049201 |
| 232030_at   | -0.00336105 | -0.11245849 | 0.910844452 | 0.952907881 |
| 232031_s_at | 0.022906996 | 0.837963769 | 0.405457906 | 0.587819922 |
| 232032_x_at | 0.133775326 | 2.743414    | 0.008056149 | 0.02926247  |
| 232033_at   | -0.01994658 | -0.61063221 | 0.543805624 | 0.708378587 |
| 232034_at   | -0.28858958 | -3.89298963 | 0.000256237 | 0.001627427 |
| 232035_at   | 0.025614758 | 0.795158884 | 0.429731908 | 0.610663895 |
| 232036_at   | 0.069249837 | 2.065303812 | 0.043329288 | 0.114007653 |
| 232037_at   | 0.03693892  | 1.16429561  | 0.249025237 | 0.421441832 |
| 232038_at   | -0.05572375 | -0.89622178 | 0.373803409 | 0.556885962 |
| 232039_at   | -0.0679938  | -1.46119821 | 0.149305776 | 0.293244288 |
| 232040_at   | 0.004731591 | 0.086985464 | 0.930979793 | 0.964096179 |
| 232041_at   | -0.03424112 | -0.88885654 | 0.377716498 | 0.560291344 |
| 232042_at   | -0.04983363 | -0.84466378 | 0.401735912 | 0.584072263 |
| 232043_at   | 0.00577304  | 0.130102161 | 0.896931432 | 0.94468844  |
| 232044_at   | 0.071332391 | 1.308224122 | 0.195908567 | 0.356534051 |
| 232045_at   | -0.32642651 | -6.52538892 | 1.76E-08    | 6.73E-07    |
| 232046_at   | 0.05354323  | 1.6142552   | 0.11184758  | 0.236848711 |
| 232047_at   | 0.016046988 | 0.460227505 | 0.647057122 | 0.785908166 |
| 232048_at   | 0.073576445 | 1.726324424 | 0.089561242 | 0.200283764 |
| 232049_at   | -0.1191345  | -3.50541503 | 0.00088137  | 0.004589326 |
| 232050_at   | 0.073184656 | 1.916363345 | 0.060203105 | 0.147429981 |
| 232051_at   | 0.052991867 | 1.626120425 | 0.109293485 | 0.232819087 |
| 232052_at   | -0.00058556 | -0.01182473 | 0.990605641 | 0.995550873 |
| 232053_x_at | -0.5504071  | -4.55403118 | 2.72E-05    | 0.000247032 |
| 232054_at   | -0.70713361 | -5.83520166 | 2.47E-07    | 5.12E-06    |
| 232055_at   | -0.06539306 | -1.58738344 | 0.117810612 | 0.246309635 |
| 232056_at   | -0.00284719 | -0.13449958 | 0.893468699 | 0.942985632 |
| 232057_at   | 0.045814837 | 1.398688472 | 0.167179816 | 0.318645528 |
| 232058_at   | 0.250253762 | 4.414031184 | 4.42E-05    | 0.000371321 |
| 232059_at   | -0.12603974 | -3.71606079 | 0.000454082 | 0.002640021 |
| 232060_at   | 0.093805565 | 2.680407903 | 0.009534431 | 0.033564585 |
| 232061_at   | -0.01348832 | -0.47943715 | 0.633413178 | 0.77638368  |
| 232062_at   | -0.08826319 | -2.715967   | 0.008672166 | 0.031073232 |
| 232063_x_at | -0.03256369 | -0.56286595 | 0.575674646 | 0.733076455 |
| 232064_at   | 0.060177389 | 1.399918277 | 0.166812915 | 0.318095438 |
| 232065_x_at | 0.054568377 | 2.136878891 | 0.036795673 | 0.100113979 |
| 232066_x_at | -0.13309674 | -3.6185728  | 0.000618765 | 0.003426748 |
| 232067_at   | -0.60006876 | -6.62842648 | 1.18E-08    | 5.08E-07    |
| 232068_s_at | 0.254942991 | 3.35471993  | 0.001398454 | 0.006755996 |
| 232069_at   | 0.068661335 | 1.890433897 | 0.0636509   | 0.154073491 |
| 232070_at   | 0.009553422 | 0.417082988 | 0.678142614 | 0.807060679 |
| 232071_at   | 0.145338692 | 2.192739815 | 0.03231137  | 0.090393797 |
| 232072_at   | 0.018961729 | 0.601743527 | 0.549667281 | 0.712690537 |
| 232073_at   | -0.11194989 | -2.24986073 | 0.028229745 | 0.081087715 |
| 232074_at   | -0.01660889 | -0.3781634  | 0.706676458 | 0.827120895 |
| 232075_at   | -0.0443109  | -0.83420501 | 0.407555201 | 0.589830536 |
| 232076_at   | 0.050034192 | 1.555401527 | 0.125238228 | 0.257944924 |
| 232077_s_at | 0.18618537  | 4.96086024  | 6.36E-06    | 7.35E-05    |
| 232078_at   | -0.04607917 | -1.28919205 | 0.20239994  | 0.364891413 |
| 232079_s_at | 0.061962088 | 1.336743855 | 0.186475974 | 0.344279929 |
| 232080_at   | -0.09580514 | -1.58444929 | 0.118476938 | 0.247289898 |
| 232081_at   | -0.01986636 | -0.38113368 | 0.704483201 | 0.825721563 |
| 232082_x_at | 0.001551565 | 0.052006846 | 0.95870022  | 0.978917275 |
| 232083_at   | -0.00409125 | -0.13329871 | 0.894414115 | 0.943608792 |
| 232084_at   | -0.05721747 | -2.15436556 | 0.035336703 | 0.096970891 |
| 232085_at   | -0.00059359 | -0.01690518 | 0.986569721 | 0.993439507 |
| 232086_at   | -0.28785848 | -5.14954049 | 3.20E-06    | 4.18E-05    |
| 232087_at   | 0.220565002 | 3.954174175 | 0.0002096   | 0.001370709 |
| 232088_x_at | 0.083000383 | 2.428369103 | 0.018257677 | 0.0572371   |
| 232089_at   | 0.004780883 | 0.143628586 | 0.886286826 | 0.939158072 |
| 232090_at   | -0.04496955 | -1.46530136 | 0.148186933 | 0.291726297 |

|             |             |             |             |             |
|-------------|-------------|-------------|-------------|-------------|
| 232091_s_at | 0.034983064 | 1.166047484 | 0.248321884 | 0.42052221  |
| 232092_at   | 0.00952979  | 0.375752579 | 0.708458453 | 0.828236997 |
| 232093_at   | -0.06810604 | -1.72474682 | 0.089847438 | 0.200661859 |
| 232094_at   | 0.188161015 | 1.753474434 | 0.08475279  | 0.191970589 |
| 232095_at   | 0.116371059 | 1.677950117 | 0.098686104 | 0.215386989 |
| 232096_x_at | 0.101312632 | 1.950274314 | 0.055934778 | 0.13928221  |
| 232097_at   | 0.031829488 | 0.655367678 | 0.514797197 | 0.685193034 |
| 232098_at   | 0.367340016 | 3.808018864 | 0.000337833 | 0.002055448 |
| 232099_at   | 0.069834241 | 1.541310634 | 0.128627457 | 0.263118743 |
| 232100_at   | 0.01877047  | 0.652873617 | 0.516392484 | 0.686236699 |
| 232101_s_at | -0.01277362 | -0.36433043 | 0.716923423 | 0.834220517 |
| 232102_at   | -0.103332   | -3.18908997 | 0.002292635 | 0.010221714 |
| 232103_at   | -0.16214869 | -4.33269722 | 5.86E-05    | 0.000469901 |
| 232104_at   | 0.010907192 | 0.270117896 | 0.788019124 | 0.878959536 |
| 232105_at   | -0.12878328 | -2.7435807  | 0.008052534 | 0.029254093 |
| 232106_s_at | -0.02376624 | -0.76126934 | 0.449550714 | 0.628987095 |
| 232107_at   | -0.07432285 | -1.72209988 | 0.090329321 | 0.201467114 |
| 232108_at   | -0.09043673 | -2.22882553 | 0.029676585 | 0.084355652 |
| 232109_at   | 0.122305179 | 2.406202002 | 0.019294515 | 0.05987613  |
| 232110_at   | -0.04894522 | -1.2190067  | 0.227728807 | 0.395233423 |
| 232111_at   | -1.18932683 | -8.12657206 | 3.52E-11    | 1.20E-08    |
| 232112_at   | -0.00841324 | -0.25434345 | 0.800121151 | 0.886938697 |
| 232113_at   | 0.769912827 | 4.704438154 | 1.60E-05    | 0.000158508 |
| 232114_at   | -0.05290571 | -1.60139726 | 0.114669668 | 0.241326842 |
| 232115_at   | -0.03132095 | -0.80387235 | 0.424721588 | 0.606132877 |
| 232116_at   | -0.00658956 | -0.15906212 | 0.874167191 | 0.932239193 |
| 232117_at   | 0.108016125 | 3.00588932  | 0.003894999 | 0.016042327 |
| 232118_at   | -0.06292756 | -2.25409096 | 0.027946428 | 0.080423808 |
| 232119_at   | 0.057294657 | 1.630635605 | 0.108334063 | 0.23132661  |
| 232120_at   | 0.136148636 | 2.87572037  | 0.005612754 | 0.021670413 |
| 232121_at   | -0.03671373 | -0.85567272 | 0.395666607 | 0.578332941 |
| 232122_s_at | -0.01540097 | -0.36780716 | 0.71434298  | 0.832388185 |
| 232123_at   | -0.20798711 | -4.82387382 | 1.04E-05    | 0.000110509 |
| 232124_at   | 0.138568585 | 2.482452122 | 0.015934918 | 0.051146464 |
| 232125_at   | 0.595457151 | 4.73454573  | 1.43E-05    | 0.000144203 |
| 232126_at   | -0.09933133 | -2.75740767 | 0.007757785 | 0.028353328 |
| 232127_at   | 0.025605424 | 0.666857201 | 0.507482162 | 0.678697935 |
| 232128_s_at | 0.071999647 | 2.189401602 | 0.032565199 | 0.090905926 |
| 232129_s_at | 0.063175519 | 1.227479021 | 0.224553614 | 0.391700173 |
| 232130_at   | -0.10925463 | -2.46586403 | 0.016617316 | 0.052920685 |
| 232131_at   | 0.019793803 | 0.591843041 | 0.556233565 | 0.718515246 |
| 232132_at   | -0.00577826 | -0.14948737 | 0.88168267  | 0.936722339 |
| 232133_at   | -0.00227948 | -0.07906919 | 0.93724714  | 0.967374871 |
| 232134_at   | 0.040277903 | 1.081692659 | 0.283822985 | 0.461275568 |
| 232135_at   | 0.093728737 | 2.866851475 | 0.005752211 | 0.022125642 |
| 232136_s_at | -0.30081373 | -3.64002267 | 0.000578249 | 0.003240517 |
| 232137_at   | -0.03084756 | -1.23546852 | 0.221589216 | 0.388530944 |
| 232138_at   | -0.02304609 | -0.33391441 | 0.73963685  | 0.848943283 |
| 232139_s_at | -0.03804695 | -1.1206866  | 0.266995767 | 0.442258435 |
| 232140_at   | 0.093276747 | 1.763519357 | 0.083028923 | 0.1888796   |
| 232141_at   | 0.166661434 | 2.403472998 | 0.019425744 | 0.060214687 |
| 232142_at   | -0.00520403 | -0.17386317 | 0.862572567 | 0.925217039 |
| 232143_at   | -0.04203806 | -1.1603263  | 0.250624145 | 0.423282228 |
| 232144_at   | 0.175321573 | 3.204786899 | 0.002189031 | 0.009837323 |
| 232145_at   | 0.239832642 | 4.652208751 | 1.92E-05    | 0.000184642 |
| 232146_at   | -0.12139896 | -3.0708602  | 0.003234293 | 0.013684278 |
| 232147_at   | 0.033710079 | 1.089720041 | 0.280299997 | 0.457535814 |
| 232148_at   | -0.02983377 | -0.84684016 | 0.400531427 | 0.582889956 |
| 232149_s_at | -0.09444126 | -1.37738453 | 0.173634784 | 0.327387483 |
| 232150_at   | 0.251851424 | 5.603564307 | 5.93E-07    | 1.04E-05    |
| 232151_at   | 0.019270807 | 0.574247641 | 0.567999353 | 0.727445574 |
| 232152_at   | -0.01432073 | -0.45932542 | 0.647700888 | 0.786262714 |
| 232153_at   | -0.09608541 | -2.04826529 | 0.045025338 | 0.117532411 |
| 232154_at   | 0.107936677 | 2.639318903 | 0.010628014 | 0.036624815 |
| 232155_at   | 0.055102788 | 1.324571787 | 0.190458796 | 0.349328381 |
| 232156_at   | -0.0165408  | -0.27807614 | 0.781933281 | 0.875346697 |
| 232157_at   | -0.06405524 | -1.70763268 | 0.093000945 | 0.206058114 |
| 232158_x_at | 0.055579674 | 1.744071216 | 0.08639334  | 0.194870088 |
| 232159_at   | -0.07104574 | -2.19047019 | 0.032483757 | 0.090746597 |
| 232160_s_at | 0.141490937 | 4.202505906 | 9.14E-05    | 0.000682972 |
| 232161_x_at | 0.009562446 | 0.270735557 | 0.787546304 | 0.878733119 |
| 232162_at   | 0.01652449  | 0.489877285 | 0.626050808 | 0.770927158 |
| 232163_at   | 0.1388335   | 2.532497057 | 0.014026639 | 0.045958838 |
| 232164_s_at | 0.258569984 | 2.420021602 | 0.0186421   | 0.058176996 |
| 232165_at   | 0.142429087 | 1.405262309 | 0.165225777 | 0.315796537 |

|             |             |             |             |             |
|-------------|-------------|-------------|-------------|-------------|
| 232166_at   | -0.28446576 | -3.92127147 | 0.000233557 | 0.00150579  |
| 232167_at   | -0.07729582 | -1.57643809 | 0.120311671 | 0.249998568 |
| 232168_x_at | 0.307139966 | 6.011547582 | 1.27E-07    | 3.04E-06    |
| 232169_x_at | 0.30350351  | 5.895459822 | 1.97E-07    | 4.29E-06    |
| 232170_at   | -0.01938554 | -0.70414997 | 0.484129898 | 0.659053714 |
| 232171_x_at | 0.05085613  | 1.179976148 | 0.242780412 | 0.413474631 |
| 232172_at   | 0.033006485 | 0.942025689 | 0.350049163 | 0.533174194 |
| 232173_at   | -0.14493766 | -2.52181273 | 0.014415761 | 0.046995175 |
| 232174_at   | 0.059319862 | 1.547588968 | 0.127108427 | 0.260847177 |
| 232175_at   | 0.003698442 | 0.111539987 | 0.911569553 | 0.953154238 |
| 232176_at   | -0.24365219 | -4.12512984 | 0.00011863  | 0.000852106 |
| 232177_at   | -0.01296859 | -0.3392733  | 0.735617435 | 0.846256388 |
| 232178_at   | -0.1644579  | -3.80575895 | 0.000340312 | 0.002067878 |
| 232179_at   | -0.08199226 | -1.83366332 | 0.071786746 | 0.168919773 |
| 232180_at   | 0.1357854   | 2.87514505  | 0.005621704 | 0.021698351 |
| 232181_at   | -0.4207052  | -6.65206335 | 1.08E-08    | 4.73E-07    |
| 232182_at   | -0.37252584 | -5.8427728  | 2.40E-07    | 4.98E-06    |
| 232183_at   | -0.06867245 | -1.88876691 | 0.063878169 | 0.154516299 |
| 232184_at   | -0.01947008 | -0.54247716 | 0.589548226 | 0.743939049 |
| 232185_at   | -0.04573198 | -1.03047104 | 0.307025835 | 0.487186175 |
| 232186_at   | -0.02999062 | -0.91160735 | 0.365712556 | 0.549041808 |
| 232187_at   | 0.059674208 | 1.687111135 | 0.096901865 | 0.212499419 |
| 232188_at   | -0.01070628 | -0.39378576 | 0.695169282 | 0.819403565 |
| 232189_at   | -0.01102438 | -0.32121111 | 0.749193922 | 0.855371334 |
| 232190_x_at | 0.088608881 | 2.283808005 | 0.026026058 | 0.076142745 |
| 232191_at   | 0.014449388 | 0.474694449 | 0.636770121 | 0.778597856 |
| 232192_at   | -0.09894527 | -2.39939484 | 0.01962334  | 0.060650507 |
| 232193_at   | 0.008983002 | 0.130361673 | 0.896727024 | 0.944627488 |
| 232194_at   | -0.02987036 | -0.60693397 | 0.546240554 | 0.710240198 |
| 232195_at   | -1.1919574  | -7.60894602 | 2.62E-10    | 3.88E-08    |
| 232196_at   | 0.083183733 | 1.855456362 | 0.068565648 | 0.16316149  |
| 232197_x_at | -0.07455497 | -2.52623626 | 0.014253487 | 0.046534943 |
| 232198_at   | 0.027205645 | 0.872624685 | 0.386431352 | 0.569078357 |
| 232199_at   | 0.095231408 | 2.529192049 | 0.014145979 | 0.046261679 |
| 232200_at   | -0.03474415 | -1.23996605 | 0.219933168 | 0.386856625 |
| 232201_at   | 0.035683036 | 1.441807196 | 0.154682999 | 0.300830836 |
| 232202_at   | -0.01681632 | -0.53865463 | 0.592166777 | 0.745769369 |
| 232203_at   | 0.042858883 | 1.132138314 | 0.262190386 | 0.436677825 |
| 232204_at   | -0.09455093 | -2.00272201 | 0.049843278 | 0.127168375 |
| 232205_at   | 0.328360886 | 3.713018271 | 0.000458518 | 0.002662693 |
| 232206_at   | 0.061641416 | 1.826480551 | 0.072875869 | 0.170825991 |
| 232207_at   | 0.292564502 | 6.357412718 | 3.36E-08    | 1.09E-06    |
| 232208_at   | -0.28392669 | -3.18260057 | 0.002336799 | 0.010388561 |
| 232209_x_at | 0.00445593  | 0.134450996 | 0.893506948 | 0.942985632 |
| 232210_at   | 0.43841262  | 5.781131396 | 3.04E-07    | 6.05E-06    |
| 232211_at   | -0.02697773 | -0.79834842 | 0.427893819 | 0.609162251 |
| 232212_at   | -0.0479598  | -1.51288403 | 0.135687069 | 0.273664266 |
| 232213_at   | -0.11237545 | -2.81523452 | 0.006629465 | 0.024887363 |
| 232214_x_at | -0.06258856 | -1.74179771 | 0.086793918 | 0.195543367 |
| 232215_x_at | 0.318703926 | 5.997594745 | 1.33E-07    | 3.17E-06    |
| 232216_at   | 0.159373937 | 2.900275554 | 0.005242795 | 0.020481732 |
| 232217_at   | 0.039360553 | 1.178560828 | 0.243339388 | 0.414140287 |
| 232218_at   | -0.04567523 | -1.42722195 | 0.158826088 | 0.306693542 |
| 232219_x_at | 0.17324768  | 3.878135917 | 0.000268983 | 0.001694007 |
| 232220_at   | 0.121392035 | 2.653764867 | 0.010231122 | 0.035513798 |
| 232221_x_at | 0.090385359 | 2.61875017  | 0.01121738  | 0.038286785 |
| 232222_at   | 0.010327643 | 0.205772464 | 0.837682257 | 0.91038568  |
| 232223_at   | -0.01148122 | -0.38964862 | 0.69820976  | 0.821319469 |
| 232224_at   | 0.335985283 | 3.782805163 | 0.0003665   | 0.002198313 |
| 232225_at   | 0.013858048 | 0.390359276 | 0.697687129 | 0.821045069 |
| 232226_at   | -0.29891949 | -5.50753197 | 8.50E-07    | 1.40E-05    |
| 232227_at   | 0.014273    | 0.403484491 | 0.68806122  | 0.81403092  |
| 232228_at   | 0.030032944 | 0.753717072 | 0.454038732 | 0.633308352 |
| 232229_at   | 0.005970884 | 0.180071791 | 0.857717829 | 0.922383359 |
| 232230_at   | 0.333071674 | 4.327942847 | 5.95E-05    | 0.000476016 |
| 232231_at   | 0.230320143 | 2.764235608 | 0.007615921 | 0.027915258 |
| 232232_s_at | -0.03848113 | -1.0330517  | 0.305826829 | 0.485887403 |
| 232233_at   | 0.00972772  | 0.361747719 | 0.718842476 | 0.83549641  |
| 232234_at   | 0.006314402 | 0.206546562 | 0.837080393 | 0.910083365 |
| 232235_at   | -0.02545056 | -0.31751991 | 0.751978419 | 0.857266523 |
| 232236_at   | 0.093793576 | 2.226468427 | 0.029842719 | 0.08477282  |
| 232237_at   | 0.082658719 | 2.883622825 | 0.005491135 | 0.021280766 |
| 232238_at   | -0.06495206 | -2.81194772 | 0.006689306 | 0.025067789 |
| 232239_at   | -0.05004565 | -1.16130504 | 0.250229209 | 0.422711061 |
| 232240_at   | -0.01118507 | -0.35190643 | 0.72617151  | 0.840125735 |

|             |             |             |             |             |
|-------------|-------------|-------------|-------------|-------------|
| 232241_at   | -0.01389704 | -0.57550457 | 0.567154825 | 0.726930494 |
| 232242_at   | -0.02625834 | -0.72726481 | 0.469961052 | 0.646659463 |
| 232243_at   | -0.01510052 | -0.48062259 | 0.63257531  | 0.775837761 |
| 232244_at   | 0.035032681 | 0.582828554 | 0.562246175 | 0.723250901 |
| 232245_at   | -0.0005569  | -0.01176224 | 0.990655284 | 0.995555989 |
| 232246_at   | 0.013424455 | 0.393916223 | 0.695073483 | 0.819333864 |
| 232247_at   | 1.83E-05    | 0.000509676 | 0.99959507  | 0.999776037 |
| 232248_at   | 0.023879818 | 0.823380757 | 0.413631812 | 0.595862331 |
| 232249_at   | 0.033703955 | 0.92934077  | 0.356527232 | 0.539675361 |
| 232250_at   | -0.02953297 | -0.85699184 | 0.394942599 | 0.577596604 |
| 232251_at   | -0.00261273 | -0.09317593 | 0.926081812 | 0.961287519 |
| 232252_at   | -0.01883661 | -0.42812328 | 0.670131705 | 0.80138944  |
| 232253_at   | 0.139404226 | 2.872885651 | 0.005656984 | 0.021808153 |
| 232254_at   | -0.00436616 | -0.08362538 | 0.933639471 | 0.965459989 |
| 232255_at   | 0.001739433 | 0.062959493 | 0.950013148 | 0.974365751 |
| 232256_s_at | 0.012159715 | 0.374827754 | 0.709142486 | 0.828926285 |
| 232257_s_at | -0.11793725 | -2.48978006 | 0.015641592 | 0.050349613 |
| 232258_at   | -0.05332413 | -1.66756679 | 0.10074084  | 0.218781749 |
| 232259_s_at | 0.010308802 | 0.235854779 | 0.814368211 | 0.895965793 |
| 232260_at   | 0.027206035 | 1.075663276 | 0.286489253 | 0.464461211 |
| 232261_at   | 0.004161029 | 0.162135638 | 0.871757135 | 0.930774862 |
| 232262_at   | -0.05925582 | -1.73995606 | 0.087119531 | 0.196128655 |
| 232263_at   | 0.028060456 | 0.405639891 | 0.686485362 | 0.81278044  |
| 232264_at   | 0.212869515 | 3.081264799 | 0.003138762 | 0.013341979 |
| 232265_at   | -0.02662577 | -0.69418862 | 0.490308484 | 0.664617961 |
| 232266_x_at | 0.500136005 | 7.046483708 | 2.34E-09    | 1.62E-07    |
| 232267_at   | 0.030980489 | 0.62585367  | 0.533842441 | 0.700525174 |
| 232268_at   | -0.05411877 | -1.52851496 | 0.131768124 | 0.267753978 |
| 232269_x_at | 0.126244149 | 2.133307048 | 0.037100074 | 0.100727569 |
| 232270_at   | 0.186339927 | 2.394665371 | 0.019854747 | 0.061234446 |
| 232271_at   | 0.065627981 | 2.77634873  | 0.007370101 | 0.027165738 |
| 232272_at   | -0.00642472 | -0.23403832 | 0.81577143  | 0.896885458 |
| 232273_at   | 0.037022512 | 0.947291424 | 0.347382641 | 0.53034177  |
| 232274_at   | 0.055868239 | 1.252687994 | 0.215298152 | 0.381148942 |
| 232275_s_at | -0.2975549  | -4.25820035 | 7.56E-05    | 0.000583178 |
| 232276_at   | -0.25167833 | -4.31997498 | 6.12E-05    | 0.000486953 |
| 232277_at   | 0.069520075 | 1.713413251 | 0.091925756 | 0.204242899 |
| 232278_s_at | -0.01843077 | -0.65523635 | 0.514881133 | 0.685261096 |
| 232279_at   | 0.244242924 | 5.01398307  | 5.25E-06    | 6.26E-05    |
| 232280_at   | 0.215213349 | 4.575795205 | 2.52E-05    | 0.000231972 |
| 232281_at   | 0.098629396 | 3.184690519 | 0.002322489 | 0.010333449 |
| 232282_at   | -0.14166883 | -3.29219295 | 0.001688141 | 0.007907599 |
| 232283_at   | -0.1702787  | -3.89653651 | 0.000253281 | 0.001610418 |
| 232284_at   | -0.05071961 | -1.31426094 | 0.193882594 | 0.353912789 |
| 232285_at   | 0.044962483 | 1.204082873 | 0.233401437 | 0.402065102 |
| 232286_at   | -0.05546974 | -0.9362489  | 0.352989759 | 0.53615002  |
| 232287_at   | -0.04355398 | -1.52037397 | 0.133797838 | 0.27084396  |
| 232288_at   | 0.013420863 | 0.550673932 | 0.583951726 | 0.739675496 |
| 232289_at   | -0.12008708 | -3.00665281 | 0.003886553 | 0.01601488  |
| 232290_at   | -0.00910241 | -0.22742244 | 0.82088732  | 0.900451515 |
| 232291_at   | -0.0265509  | -0.91630681 | 0.363263756 | 0.546349361 |
| 232292_at   | 0.021109413 | 0.834420644 | 0.407434701 | 0.589786605 |
| 232293_at   | 0.029069852 | 0.580038861 | 0.564113388 | 0.72465165  |
| 232294_at   | 0.017350025 | 0.563171812 | 0.57546773  | 0.732896495 |
| 232295_at   | -0.05396823 | -1.35868174 | 0.179457582 | 0.335255539 |
| 232296_s_at | -0.05630197 | -1.24881511 | 0.216701464 | 0.382828068 |
| 232297_at   | 0.411204867 | 5.720979446 | 3.81E-07    | 7.27E-06    |
| 232298_at   | -0.14157969 | -3.54004112 | 0.000791447 | 0.004193403 |
| 232299_at   | 0.280364658 | 4.083706457 | 0.000136314 | 0.000956829 |
| 232300_at   | -0.04910513 | -1.37578241 | 0.174127834 | 0.328087479 |
| 232301_at   | 0.111704291 | 3.090558439 | 0.003055669 | 0.013047096 |
| 232302_at   | -0.05487041 | -1.52133144 | 0.133557839 | 0.270505164 |
| 232303_at   | 0.134067553 | 4.697017163 | 1.64E-05    | 0.000161558 |
| 232304_at   | 0.014158897 | 0.197857363 | 0.843841815 | 0.914266489 |
| 232305_at   | -0.35853438 | -3.65896065 | 0.000544595 | 0.003079332 |
| 232306_at   | -0.00585319 | -0.15544517 | 0.877004904 | 0.934106367 |
| 232307_at   | 0.219703968 | 4.862460363 | 9.08E-06    | 9.85E-05    |
| 232308_at   | 0.045967176 | 1.227001071 | 0.224731869 | 0.391949919 |
| 232309_at   | -0.08570517 | -2.13925502 | 0.036594384 | 0.099711999 |
| 232310_at   | -0.08313422 | -2.37953064 | 0.020611779 | 0.063068714 |
| 232311_at   | 0.034104429 | 1.175624803 | 0.24450192  | 0.415612345 |
| 232312_at   | 0.110049592 | 2.136793148 | 0.036802954 | 0.100123212 |
| 232313_at   | 0.049021685 | 0.959242184 | 0.341380199 | 0.524294291 |
| 232314_at   | -0.05499033 | -1.52895658 | 0.131658721 | 0.267604673 |
| 232315_at   | -0.00260656 | -0.02126424 | 0.983107153 | 0.991739271 |

|             |             |             |             |             |
|-------------|-------------|-------------|-------------|-------------|
| 232316_at   | -0.04236582 | -1.25643957 | 0.213945214 | 0.379490375 |
| 232317_at   | -0.03389612 | -0.76984677 | 0.444484916 | 0.624663371 |
| 232318_s_at | -0.03793443 | -1.0209042  | 0.311498536 | 0.492447561 |
| 232319_at   | -0.00011207 | -0.00477018 | 0.996210176 | 0.998153238 |
| 232320_at   | -0.04527474 | -1.58376555 | 0.118632645 | 0.247476203 |
| 232321_at   | 0.075593314 | 2.387445494 | 0.020212721 | 0.062128398 |
| 232322_x_at | 0.03627442  | 0.568240736 | 0.572043875 | 0.730348292 |
| 232323_s_at | 0.201447944 | 4.202241924 | 9.14E-05    | 0.000683355 |
| 232324_x_at | 0.066750044 | 2.046366658 | 0.045217842 | 0.117911916 |
| 232325_at   | -0.02674566 | -1.15203677 | 0.253986986 | 0.427121703 |
| 232326_at   | -0.04751154 | -1.29726693 | 0.199626418 | 0.361275719 |
| 232327_at   | 0.006578391 | 0.200517761 | 0.841770371 | 0.913094377 |
| 232328_at   | -0.03644813 | -0.92177137 | 0.360429542 | 0.543662219 |
| 232329_at   | -0.03152178 | -0.8317609  | 0.408922501 | 0.591078767 |
| 232330_at   | 0.04609732  | 1.475418021 | 0.145456391 | 0.287757826 |
| 232331_at   | -0.05926441 | -1.43768362 | 0.155845715 | 0.302394681 |
| 232332_at   | -0.05781491 | -1.5805655  | 0.119363578 | 0.248479065 |
| 232333_at   | 0.326648597 | 6.230641787 | 5.48E-08    | 1.58E-06    |
| 232334_at   | -0.08694305 | -2.43897765 | 0.017779405 | 0.055973316 |
| 232335_at   | 0.034577542 | 0.88913484  | 0.377568172 | 0.560197753 |
| 232336_at   | -0.03515976 | -1.07082507 | 0.288641277 | 0.46683154  |
| 232337_at   | 0.014491397 | 0.525816247 | 0.601001296 | 0.752400625 |
| 232338_at   | 0.123914047 | 1.787930932 | 0.0789607   | 0.18175276  |
| 232339_at   | -0.04271389 | -1.645318   | 0.105261403 | 0.226322652 |
| 232340_at   | 0.045901492 | 1.27340158  | 0.207906636 | 0.371878786 |
| 232341_x_at | -0.39298563 | -6.6071274  | 1.28E-08    | 5.42E-07    |
| 232342_at   | 0.155505444 | 4.247562379 | 7.84E-05    | 0.000600978 |
| 232343_at   | -0.0820945  | -2.24480362 | 0.028571771 | 0.081906965 |
| 232344_at   | 0.185507737 | 3.697008698 | 0.000482551 | 0.002779145 |
| 232345_at   | 0.039182232 | 1.347301371 | 0.183072849 | 0.340005476 |
| 232346_at   | 0.011819563 | 0.305803763 | 0.76083843  | 0.862307994 |
| 232347_x_at | 0.388165174 | 8.757598388 | 3.08E-12    | 3.45E-09    |
| 232348_at   | -0.04479026 | -1.35535646 | 0.180508268 | 0.336753861 |
| 232349_x_at | -0.22659725 | -4.99965126 | 5.53E-06    | 6.54E-05    |
| 232350_x_at | 0.115723659 | 3.292653123 | 0.001685816 | 0.007899773 |
| 232351_at   | 0.035536167 | 1.092369301 | 0.279144029 | 0.456059402 |
| 232352_at   | -0.0231693  | -0.44109819 | 0.660766032 | 0.795057163 |
| 232353_s_at | 0.040384553 | 0.878645427 | 0.383184239 | 0.565862741 |
| 232354_at   | -0.03265959 | -1.25518719 | 0.214396161 | 0.38010254  |
| 232355_at   | -0.40614018 | -6.82648599 | 5.49E-09    | 2.95E-07    |
| 232356_at   | 0.349309835 | 4.343357608 | 5.65E-05    | 0.000456348 |
| 232357_at   | 0.252111867 | 3.780348389 | 0.000369415 | 0.002214402 |
| 232358_at   | 0.000942566 | 0.029296411 | 0.976727795 | 0.988331554 |
| 232359_at   | 0.021295168 | 0.594480158 | 0.554480725 | 0.716810406 |
| 232360_at   | 0.011883627 | 0.394808175 | 0.694418658 | 0.818842739 |
| 232361_s_at | -0.00766012 | -0.17716399 | 0.859990865 | 0.923668024 |
| 232362_at   | -0.06489354 | -2.20867222 | 0.031123718 | 0.087703733 |
| 232363_at   | 0.144018633 | 3.320655712 | 0.001549875 | 0.007362565 |
| 232364_at   | 0.005020691 | 0.137041856 | 0.891467743 | 0.941901141 |
| 232365_at   | 0.046047843 | 1.622183002 | 0.110135755 | 0.23415571  |
| 232366_at   | -0.23365399 | -4.06899483 | 0.000143187 | 0.000996002 |
| 232367_x_at | -0.0401056  | -1.10690434 | 0.272861057 | 0.448899377 |
| 232368_at   | 0.023451761 | 0.773200257 | 0.442513482 | 0.622795024 |
| 232369_at   | -0.11032745 | -1.632566   | 0.107925968 | 0.230648308 |
| 232370_at   | 0.095053067 | 2.658608099 | 0.010101117 | 0.035175248 |
| 232371_at   | -0.01042773 | -0.40965941 | 0.683550343 | 0.81084064  |
| 232372_at   | 0.037212446 | 0.728944154 | 0.468940889 | 0.645781979 |
| 232373_at   | -0.03350626 | -0.94177683 | 0.350175512 | 0.533293941 |
| 232374_s_at | 0.019641468 | 0.538068463 | 0.592568807 | 0.746002397 |
| 232375_at   | 0.057316372 | 1.339266178 | 0.185658597 | 0.343409238 |
| 232376_at   | 0.082821774 | 2.390518991 | 0.020059631 | 0.061725767 |
| 232377_at   | -0.26279626 | -2.563601   | 0.012947378 | 0.043044277 |
| 232378_at   | -0.01104346 | -0.26001425 | 0.79576472  | 0.88402478  |
| 232379_at   | 0.004035225 | 0.115212893 | 0.908670492 | 0.951662682 |
| 232380_at   | -0.01783567 | -0.62003199 | 0.537641818 | 0.703651404 |
| 232381_s_at | 0.412133673 | 3.378637399 | 0.001300617 | 0.006354778 |
| 232382_s_at | -0.03711101 | -0.54461761 | 0.588084352 | 0.742825896 |
| 232383_at   | -0.03357519 | -0.76429354 | 0.44776081  | 0.6273733   |
| 232384_s_at | 0.045757503 | 1.140215877 | 0.258837936 | 0.432825397 |
| 232385_x_at | 0.019663654 | 0.900744656 | 0.371413239 | 0.554605999 |
| 232386_at   | 0.102588671 | 1.711908618 | 0.092204628 | 0.204730188 |
| 232387_at   | 0.02496157  | 0.786038382 | 0.435013822 | 0.61568983  |
| 232388_at   | 0.304015051 | 2.806641959 | 0.006786956 | 0.025378399 |
| 232389_at   | -0.21132415 | -4.41375346 | 4.43E-05    | 0.000371609 |
| 232390_at   | -0.13162441 | -4.0154264  | 0.000171155 | 0.00115565  |

|             |             |             |             |             |
|-------------|-------------|-------------|-------------|-------------|
| 232391_at   | -0.06262093 | -2.17903708 | 0.033364486 | 0.09266683  |
| 232392_at   | 0.19953841  | 2.022461301 | 0.047703158 | 0.122949207 |
| 232393_at   | 0.012839518 | 0.4339348   | 0.665930162 | 0.798801621 |
| 232394_at   | 0.017724524 | 0.446710392 | 0.656731696 | 0.792246502 |
| 232395_x_at | 0.074427739 | 2.813403925 | 0.006662732 | 0.024984967 |
| 232396_at   | 0.07229918  | 1.979305284 | 0.052488718 | 0.132495452 |
| 232397_at   | -0.02778785 | -1.45733271 | 0.15036586  | 0.294792273 |
| 232398_at   | 0.041309715 | 1.044199312 | 0.300684139 | 0.480140088 |
| 232399_at   | -0.37139577 | -6.28606785 | 4.43E-08    | 1.34E-06    |
| 232400_at   | 0.032653725 | 0.889690888 | 0.377271921 | 0.559932659 |
| 232401_at   | -0.27009636 | -5.585828   | 6.34E-07    | 1.10E-05    |
| 232402_at   | 0.032044421 | 0.895280113 | 0.374302268 | 0.557387611 |
| 232403_at   | -0.01486817 | -0.41280746 | 0.681255083 | 0.809363926 |
| 232404_at   | 0.046129217 | 1.457005331 | 0.15045591  | 0.294907046 |
| 232405_at   | -0.00954578 | -0.25940116 | 0.796235396 | 0.88428389  |
| 232406_at   | 0.086053984 | 2.080753629 | 0.041839526 | 0.110788725 |
| 232407_at   | 0.051968096 | 1.396689175 | 0.167777616 | 0.319457958 |
| 232408_at   | -0.23297527 | -4.65698008 | 1.89E-05    | 0.00018206  |
| 232409_x_at | -1.41770739 | -7.64883106 | 2.25E-10    | 3.47E-08    |
| 232410_at   | 0.013452163 | 0.402666408 | 0.688659701 | 0.814566466 |
| 232411_at   | -0.02343247 | -0.54030182 | 0.591037732 | 0.744977249 |
| 232412_at   | -0.07321713 | -0.97300176 | 0.3345541   | 0.517345023 |
| 232413_at   | 0.003898793 | 0.114614631 | 0.909142623 | 0.951932059 |
| 232414_at   | 0.083849407 | 2.102519938 | 0.039816245 | 0.106510083 |
| 232415_at   | -0.01058525 | -0.44842338 | 0.655502348 | 0.791390971 |
| 232416_at   | -0.40518573 | -4.7708524  | 1.26E-05    | 0.000129128 |
| 232417_x_at | 0.160730157 | 3.044631031 | 0.003487311 | 0.014602726 |
| 232418_at   | 0.048482364 | 1.443841589 | 0.154111862 | 0.299968091 |
| 232419_at   | -0.08051363 | -2.27406183 | 0.026642574 | 0.077484865 |
| 232420_x_at | 0.154596161 | 4.045451075 | 0.000154888 | 0.001061859 |
| 232421_at   | 0.061095268 | 1.37263706  | 0.175098937 | 0.32941243  |
| 232422_at   | 0.015806963 | 0.420923543 | 0.675351588 | 0.80496088  |
| 232423_at   | 0.032208226 | 0.94170462  | 0.350212179 | 0.533331609 |
| 232424_at   | 0.571720811 | 7.168378534 | 1.46E-09    | 1.18E-07    |
| 232425_at   | -0.06135285 | -2.3355554  | 0.022959933 | 0.068876716 |
| 232426_at   | -0.41921742 | -5.7540279  | 3.36E-07    | 6.58E-06    |
| 232427_at   | 0.048367968 | 1.536213911 | 0.129871211 | 0.265032153 |
| 232428_at   | -0.04950711 | -1.64159776 | 0.106033168 | 0.227565998 |
| 232429_at   | -0.3387279  | -6.39181622 | 2.95E-08    | 9.82E-07    |
| 232430_at   | -0.04624965 | -1.23100055 | 0.223243432 | 0.390389932 |
| 232431_at   | 0.285603778 | 3.693057929 | 0.000488664 | 0.002810009 |
| 232432_s_at | -0.22653732 | -3.14004613 | 0.002646794 | 0.011551607 |
| 232433_at   | 0.083122726 | 2.774388618 | 0.007409378 | 0.027283506 |
| 232434_at   | 0.051003025 | 1.645441049 | 0.105235954 | 0.226290265 |
| 232435_at   | -0.01616971 | -0.39088511 | 0.697300513 | 0.820898099 |
| 232436_at   | 0.160365627 | 4.672082358 | 1.79E-05    | 0.000173702 |
| 232437_at   | 0.066495846 | 1.795862241 | 0.077675269 | 0.179431598 |
| 232438_at   | 0.026544809 | 0.766479506 | 0.446469617 | 0.626349629 |
| 232439_at   | -0.03753233 | -1.01190058 | 0.31574799  | 0.497072956 |
| 232440_at   | -0.03426178 | -0.7973092  | 0.428492194 | 0.609731176 |
| 232441_at   | 0.016937564 | 0.392903166 | 0.695817501 | 0.819908136 |
| 232442_at   | 0.088857446 | 2.268404041 | 0.027006376 | 0.078267877 |
| 232443_at   | -0.15989208 | -3.50223849 | 0.000890089 | 0.004628256 |
| 232444_at   | -0.01787517 | -0.59827179 | 0.551965366 | 0.71453007  |
| 232445_at   | 0.086489383 | 2.474222649 | 0.016270237 | 0.052009831 |
| 232446_at   | -0.03232831 | -1.37249018 | 0.175144385 | 0.329448931 |
| 232447_at   | 0.141721045 | 3.664847169 | 0.000534521 | 0.003029654 |
| 232448_at   | -0.08970512 | -1.82112566 | 0.073696828 | 0.172307541 |
| 232449_at   | 0.020317505 | 0.395080875 | 0.694218502 | 0.818736331 |
| 232450_at   | 0.00724504  | 0.324811829 | 0.746480901 | 0.853415645 |
| 232451_at   | 0.153357825 | 2.474700953 | 0.016250576 | 0.051965564 |
| 232452_at   | -0.01633838 | -0.48324506 | 0.630723476 | 0.774443992 |
| 232453_at   | -0.01322102 | -0.27374163 | 0.785246304 | 0.877537623 |
| 232454_at   | 0.010374576 | 0.4631835   | 0.644949487 | 0.7844782   |
| 232455_x_at | 0.144327914 | 4.158134225 | 0.000106148 | 0.000774401 |
| 232456_at   | -0.00141807 | -0.04369128 | 0.965299114 | 0.982356044 |
| 232457_at   | 0.1099499   | 2.390882663 | 0.020041586 | 0.061678733 |
| 232458_at   | -0.07935487 | -2.24547121 | 0.028526411 | 0.081808416 |
| 232459_at   | 0.194337348 | 5.051437644 | 4.58E-06    | 5.62E-05    |
| 232460_at   | 0.066747106 | 2.03551475  | 0.046331836 | 0.120237942 |
| 232461_at   | 0.036957682 | 1.065016412 | 0.291239691 | 0.469637523 |
| 232462_s_at | 0.082022446 | 2.550628906 | 0.013387988 | 0.044269686 |
| 232463_at   | 0.073648602 | 1.489464512 | 0.141730886 | 0.282500971 |
| 232464_at   | -0.05317204 | -1.05406837 | 0.296180877 | 0.475114594 |
| 232465_at   | 0.12690665  | 3.677180891 | 0.000513988 | 0.002931975 |



|             |             |             |             |             |
|-------------|-------------|-------------|-------------|-------------|
| 232466_at   | 0.214699937 | 3.353207691 | 0.001404869 | 0.006784051 |
| 232467_at   | -0.08117302 | -1.91358702 | 0.060564514 | 0.148144559 |
| 232468_at   | -0.0442855  | -1.78961958 | 0.078685543 | 0.181250092 |
| 232469_x_at | 0.181056015 | 6.287435278 | 4.40E-08    | 1.33E-06    |
| 232470_at   | 0.004201862 | 0.132160243 | 0.895310549 | 0.943908355 |
| 232471_at   | 0.164733261 | 3.601620929 | 0.000652687 | 0.003582077 |
| 232472_at   | 0.085026417 | 2.021580352 | 0.047796953 | 0.12311087  |
| 232473_at   | 0.141661588 | 2.471201349 | 0.016394931 | 0.052325265 |
| 232474_at   | -0.05643519 | -1.49973784 | 0.139054044 | 0.278609618 |
| 232475_at   | -0.01824621 | -0.50355765 | 0.616461113 | 0.764071221 |
| 232476_at   | 0.011032627 | 0.273675789 | 0.785296661 | 0.877537623 |
| 232477_at   | 0.042513669 | 1.304509985 | 0.197162925 | 0.358122553 |
| 232478_at   | 0.175157923 | 4.967396651 | 6.21E-06    | 7.20E-05    |
| 232479_at   | -0.01897279 | -0.59306375 | 0.555421842 | 0.717732505 |
| 232480_at   | 0.055818202 | 1.765372002 | 0.082714184 | 0.18831698  |
| 232481_s_at | -0.30344792 | -3.67050514 | 0.000525006 | 0.002985569 |
| 232482_at   | -0.06225446 | -1.99945146 | 0.05020573  | 0.127851538 |
| 232483_at   | -0.02696155 | -0.74596983 | 0.458669429 | 0.637303097 |
| 232484_at   | -0.01466688 | -0.69490125 | 0.489865032 | 0.664150224 |
| 232485_at   | 0.133424038 | 2.577644547 | 0.012485241 | 0.041793904 |
| 232486_at   | -0.04671572 | -1.38754691 | 0.170532195 | 0.323161353 |
| 232487_at   | 0.038912203 | 1.542264109 | 0.128395838 | 0.262709118 |
| 232488_at   | 0.093350412 | 2.732467546 | 0.008296848 | 0.029973546 |
| 232489_at   | 0.43356423  | 5.630662574 | 5.36E-07    | 9.58E-06    |
| 232490_s_at | -0.04729299 | -1.06978666 | 0.289104614 | 0.467428674 |
| 232491_at   | -0.01730683 | -0.53271537 | 0.596246182 | 0.748881049 |
| 232492_at   | -0.00390385 | -0.08580775 | 0.931911928 | 0.964636173 |
| 232493_at   | -0.02118035 | -0.46056526 | 0.646816157 | 0.785773626 |
| 232494_at   | -0.04116403 | -0.99331358 | 0.324643512 | 0.506863505 |
| 232495_x_at | 0.017636409 | 0.483051807 | 0.630859857 | 0.774507286 |
| 232496_at   | -0.00677744 | -0.14811791 | 0.882758504 | 0.937308286 |
| 232497_at   | 0.051495761 | 1.731562127 | 0.088616453 | 0.198608221 |
| 232498_at   | 0.041772472 | 1.106899435 | 0.272863163 | 0.448899377 |
| 232499_at   | 0.126801004 | 3.424230526 | 0.001131787 | 0.005644031 |
| 232500_at   | 0.350784222 | 6.2140359   | 5.84E-08    | 1.66E-06    |
| 232501_at   | -0.13830879 | -4.24971073 | 7.78E-05    | 0.000597312 |
| 232502_at   | 0.105437413 | 4.02833459  | 0.000163969 | 0.001114032 |
| 232503_at   | -0.05092484 | -1.5301595  | 0.131361093 | 0.267325685 |
| 232504_at   | -0.01937977 | -0.88001319 | 0.382448971 | 0.565131738 |
| 232505_at   | 0.075229582 | 2.050583821 | 0.044791222 | 0.117078565 |
| 232506_s_at | -0.17346198 | -5.14957266 | 3.20E-06    | 4.18E-05    |
| 232507_at   | -0.08260693 | -2.51861162 | 0.014534231 | 0.04731933  |
| 232508_at   | 0.042773907 | 1.02196834  | 0.310998859 | 0.491814196 |
| 232509_at   | 0.034652307 | 1.059123148 | 0.293892393 | 0.472501117 |
| 232510_s_at | 0.095673726 | 2.846777026 | 0.006079786 | 0.023157914 |
| 232511_at   | 0.094496337 | 2.24273455  | 0.02871276  | 0.082215921 |
| 232512_at   | 0.049054274 | 1.531823693 | 0.130950216 | 0.266673975 |
| 232513_x_at | 0.033530359 | 0.978548015 | 0.331828307 | 0.514341436 |
| 232514_at   | 0.022461563 | 0.811074444 | 0.420606868 | 0.602592399 |
| 232515_at   | 0.16197955  | 2.962109312 | 0.004408942 | 0.017783793 |
| 232516_x_at | 0.264603201 | 6.709964221 | 8.62E-09    | 4.02E-07    |
| 232517_s_at | 0.022924557 | 0.73196155  | 0.467111052 | 0.644384576 |
| 232518_at   | 0.024216721 | 0.613355595 | 0.542016091 | 0.706974759 |
| 232519_at   | -0.0198132  | -0.52625033 | 0.600701591 | 0.752193984 |
| 232520_s_at | -0.00409188 | -0.10372534 | 0.917741703 | 0.956462968 |
| 232521_at   | 0.04980467  | 1.584018208 | 0.118575088 | 0.247436981 |
| 232522_at   | 0.268695714 | 4.843689202 | 9.71E-06    | 0.000104183 |
| 232523_at   | 0.467944856 | 5.868858815 | 2.18E-07    | 4.61E-06    |
| 232524_x_at | 0.208733049 | 4.696773877 | 1.64E-05    | 0.000161596 |
| 232525_at   | 0.129561175 | 3.519638843 | 0.000843314 | 0.004420525 |
| 232526_at   | -0.08360021 | -2.14020468 | 0.036514205 | 0.099533815 |
| 232527_at   | 0.134032414 | 3.545439386 | 0.00077824  | 0.004141594 |
| 232528_at   | 0.331690596 | 6.541768352 | 1.65E-08    | 6.45E-07    |
| 232529_at   | 0.023979729 | 0.573459312 | 0.568529343 | 0.727772274 |
| 232530_at   | 0.409281315 | 3.925423513 | 0.000230395 | 0.001489052 |
| 232531_at   | 0.380114374 | 4.385208284 | 4.89E-05    | 0.000403654 |
| 232532_at   | 0.065781385 | 1.738518014 | 0.087374487 | 0.196593695 |
| 232533_at   | -0.08773248 | -2.34300433 | 0.022546134 | 0.067846139 |
| 232534_at   | 0.053269578 | 1.611162403 | 0.112521209 | 0.237914456 |
| 232535_at   | 0.0625361   | 1.274996074 | 0.20734557  | 0.371098003 |
| 232536_at   | 0.015265752 | 0.427933313 | 0.670269224 | 0.801469643 |
| 232537_x_at | 0.156290122 | 3.789645832 | 0.0003585   | 0.002160476 |
| 232538_at   | 0.048600305 | 1.055743844 | 0.295420976 | 0.474363319 |
| 232539_at   | -0.01704761 | -0.56561684 | 0.573814973 | 0.731745435 |
| 232540_x_at | -0.06815678 | -1.910923   | 0.060913034 | 0.148809736 |

|             |             |             |             |             |
|-------------|-------------|-------------|-------------|-------------|
| 232541_at   | 0.335620254 | 3.078801164 | 0.003161141 | 0.013416687 |
| 232542_at   | 0.023856843 | 0.623423199 | 0.535426936 | 0.701820477 |
| 232543_x_at | -0.0266091  | -0.5704682  | 0.570542459 | 0.72903866  |
| 232544_at   | 0.312235346 | 4.143325282 | 0.000111583 | 0.000807852 |
| 232545_at   | 0.046698549 | 1.545904785 | 0.1275145   | 0.261356478 |
| 232546_at   | 0.008948756 | 0.286180238 | 0.775749952 | 0.871670359 |
| 232547_at   | 0.097978853 | 1.743638912 | 0.086469391 | 0.194972856 |
| 232548_at   | -0.01598229 | -0.58507384 | 0.560745574 | 0.722235257 |
| 232549_at   | -0.1091731  | -2.8500113  | 0.00602587  | 0.022984397 |
| 232550_at   | -0.08203841 | -1.87114975 | 0.066322306 | 0.159085257 |
| 232551_at   | 0.065366873 | 2.04475618  | 0.045381687 | 0.118227825 |
| 232552_at   | 0.233433677 | 4.164092493 | 0.000104035 | 0.000762117 |
| 232553_at   | -0.00264344 | -0.05080996 | 0.959649848 | 0.97934992  |
| 232554_at   | -0.10789528 | -2.75131394 | 0.007886441 | 0.028748845 |
| 232555_at   | 0.204124518 | 3.687818231 | 0.000496887 | 0.002850323 |
| 232556_at   | -0.08173241 | -1.71988767 | 0.090733696 | 0.202140965 |
| 232557_at   | 0.022722539 | 0.703497813 | 0.484533071 | 0.659381627 |
| 232558_at   | -0.03798778 | -1.10642992 | 0.273064554 | 0.449048866 |
| 232559_at   | -0.01856329 | -0.72151341 | 0.47346441  | 0.64950777  |
| 232560_at   | 0.034460526 | 1.14012519  | 0.258875404 | 0.43286664  |
| 232561_at   | -0.00644788 | -0.26030514 | 0.795541423 | 0.883908544 |
| 232562_at   | -0.00103936 | -0.03144865 | 0.975018676 | 0.98731299  |
| 232563_at   | -0.05240747 | -1.70385508 | 0.093709157 | 0.207209386 |
| 232564_at   | -0.04590434 | -1.32749459 | 0.189496613 | 0.348159615 |
| 232565_at   | -0.17435901 | -3.37287698 | 0.00132357  | 0.006451412 |
| 232566_at   | -0.02173078 | -0.62658941 | 0.533363268 | 0.700225344 |
| 232567_at   | -0.00730458 | -0.21211634 | 0.832752766 | 0.907519791 |
| 232568_at   | 0.094126855 | 2.187269598 | 0.032728226 | 0.091303988 |
| 232569_at   | -0.15415548 | -3.37362618 | 0.001320563 | 0.006440268 |
| 232570_s_at | 0.149992336 | 3.527333367 | 0.000823384 | 0.004333847 |
| 232571_at   | -0.04561382 | -1.57663893 | 0.120265399 | 0.249936688 |
| 232572_at   | 0.033634807 | 0.797346823 | 0.428470522 | 0.60973077  |
| 232573_at   | -0.06073361 | -1.31996336 | 0.191983375 | 0.351442656 |
| 232574_at   | 0.013406696 | 0.330808838 | 0.741969524 | 0.850411662 |
| 232575_at   | 0.029261874 | 0.981063444 | 0.330596926 | 0.513039961 |
| 232576_at   | 0.08697839  | 2.21120263  | 0.030938672 | 0.087230884 |
| 232577_at   | 0.001238051 | 0.033681898 | 0.973245346 | 0.986490868 |
| 232578_at   | -0.04121167 | -1.52141944 | 0.1335358   | 0.270497302 |
| 232579_at   | 0.011332594 | 0.365851895 | 0.715793776 | 0.833470258 |
| 232580_x_at | 0.188156497 | 2.970145714 | 0.004310111 | 0.017456047 |
| 232581_x_at | 0.02852905  | 0.931404901 | 0.355467852 | 0.538563432 |
| 232582_at   | -0.10983579 | -2.90384147 | 0.005190988 | 0.02031543  |
| 232583_at   | 0.158030734 | 4.230650968 | 8.30E-05    | 0.000630028 |
| 232584_at   | 0.166698564 | 3.371115436 | 0.001330666 | 0.006480343 |
| 232585_at   | 0.015374498 | 0.565463266 | 0.573918715 | 0.731799579 |
| 232586_x_at | 0.069730111 | 1.724701236 | 0.089855719 | 0.200661859 |
| 232587_at   | -0.0753565  | -2.19055241 | 0.032477497 | 0.090740455 |
| 232588_at   | 0.014305695 | 0.385424103 | 0.701319591 | 0.823590277 |
| 232589_at   | -0.04540643 | -1.4378191  | 0.155807405 | 0.302343299 |
| 232590_at   | 0.036654879 | 0.938687938 | 0.351746251 | 0.534975104 |
| 232591_s_at | -0.55211992 | -4.13146997 | 0.000116127 | 0.000836278 |
| 232592_at   | -0.03410239 | -0.94079324 | 0.350675182 | 0.533848698 |
| 232593_at   | 0.002137646 | 0.066893611 | 0.94689424  | 0.972640083 |
| 232594_at   | 0.122736524 | 3.151923061 | 0.002556601 | 0.011212917 |
| 232595_at   | 0.070757434 | 1.854925681 | 0.068642613 | 0.163301164 |
| 232596_at   | 0.00427234  | 0.141081567 | 0.888289653 | 0.940051459 |
| 232597_x_at | 0.411192854 | 7.209069215 | 1.24E-09    | 1.08E-07    |
| 232598_at   | -0.09291895 | -1.66698615 | 0.100856766 | 0.219001584 |
| 232599_at   | -0.11456624 | -3.05451881 | 0.003389834 | 0.014245271 |
| 232600_at   | -0.00156086 | -0.0208849  | 0.983408462 | 0.991915734 |
| 232601_at   | 0.172855842 | 3.815337949 | 0.000329923 | 0.002015987 |
| 232602_at   | 0.07350023  | 2.001936401 | 0.049930136 | 0.127309312 |
| 232603_at   | 0.225724493 | 2.261183526 | 0.027477046 | 0.079323309 |
| 232604_at   | -0.06469603 | -1.80761074 | 0.075803348 | 0.176087485 |
| 232605_s_at | -0.01105676 | -0.42531222 | 0.672167825 | 0.802703756 |
| 232606_at   | 0.124526804 | 2.836015749 | 0.006262403 | 0.023738702 |
| 232607_at   | 0.027280816 | 0.754547965 | 0.453543699 | 0.632797671 |
| 232608_x_at | -0.02091702 | -0.88463271 | 0.379972226 | 0.562632809 |
| 232609_at   | 0.018949079 | 0.63566253  | 0.527472543 | 0.695428195 |
| 232610_at   | -0.01832899 | -0.46905561 | 0.640771337 | 0.781693806 |
| 232611_at   | 0.049264948 | 1.189465514 | 0.239056526 | 0.408781537 |
| 232612_s_at | -0.14239538 | -3.15663143 | 0.002521651 | 0.011081378 |
| 232613_at   | 0.153960321 | 4.589891018 | 2.39E-05    | 0.000222219 |
| 232614_at   | 0.30342568  | 4.544574226 | 2.81E-05    | 0.000253607 |
| 232615_at   | 0.665781516 | 7.455741391 | 4.76E-10    | 5.67E-08    |

|             |             |             |             |             |
|-------------|-------------|-------------|-------------|-------------|
| 232616_at   | -0.02322255 | -0.58665697 | 0.55968871  | 0.721310566 |
| 232617_at   | 0.179717752 | 2.780822918 | 0.007281165 | 0.026897821 |
| 232618_at   | 0.010115707 | 0.205451014 | 0.837932215 | 0.910477901 |
| 232619_at   | 0.107998811 | 3.27238271  | 0.001791157 | 0.008315194 |
| 232620_at   | 0.039534771 | 0.89180596  | 0.376146398 | 0.558911228 |
| 232621_at   | -0.05168797 | -1.33726551 | 0.186306705 | 0.344052695 |
| 232622_at   | 0.026903586 | 0.927183681 | 0.3576365   | 0.540658609 |
| 232623_at   | -0.05409171 | -1.58959716 | 0.117309891 | 0.24549605  |
| 232624_at   | 0.044185998 | 1.185033308 | 0.240790669 | 0.410882234 |
| 232625_at   | -0.03083479 | -0.99654719 | 0.323084033 | 0.505063892 |
| 232626_at   | 0.153642569 | 4.123176736 | 0.000119411 | 0.00085648  |
| 232627_at   | 0.07375033  | 1.924337074 | 0.059175307 | 0.14538668  |
| 232628_at   | 0.304509252 | 3.215753142 | 0.00211928  | 0.00956909  |
| 232629_at   | 0.046813756 | 1.33044294  | 0.188529745 | 0.346782376 |
| 232630_at   | -0.01262496 | -0.54770296 | 0.585977281 | 0.741053529 |
| 232631_at   | -0.04976919 | -1.38538153 | 0.171189691 | 0.324076995 |
| 232632_at   | -0.03852888 | -0.85947406 | 0.393583447 | 0.57634441  |
| 232633_at   | 0.081598044 | 2.258909565 | 0.02762677  | 0.079668061 |
| 232634_at   | -0.05162821 | -1.46542619 | 0.148152996 | 0.291672336 |
| 232635_at   | 0.010617896 | 0.335517617 | 0.738433598 | 0.848229737 |
| 232636_at   | -0.71893538 | -6.05517991 | 1.07E-07    | 2.66E-06    |
| 232637_at   | 0.047091136 | 1.342832502 | 0.184507545 | 0.341846082 |
| 232638_at   | -0.01069518 | -0.4605081  | 0.646856934 | 0.785773626 |
| 232639_at   | 0.217846875 | 2.755817439 | 0.007791172 | 0.028457263 |
| 232640_at   | 0.112183257 | 2.626212549 | 0.0110002   | 0.037646138 |
| 232641_at   | -0.05182996 | -1.12807019 | 0.263890392 | 0.438691765 |
| 232642_at   | -0.20321687 | -4.67703093 | 1.76E-05    | 0.000171165 |
| 232643_at   | 0.05018593  | 1.126485474 | 0.264554726 | 0.439452883 |
| 232644_x_at | 0.062855989 | 1.774833753 | 0.081122195 | 0.185657166 |
| 232645_at   | 0.215858819 | 3.805133795 | 0.000341001 | 0.002071219 |
| 232646_at   | -0.0161931  | -0.4455589  | 0.657558615 | 0.792738519 |
| 232647_at   | 0.156651398 | 3.984733917 | 0.000189481 | 0.001258663 |
| 232648_at   | 0.009818647 | 0.27226043  | 0.786379358 | 0.878198853 |
| 232649_at   | 0.049314855 | 1.50368935  | 0.138035124 | 0.277124376 |
| 232650_at   | -0.01535696 | -0.40658665 | 0.685793605 | 0.812401934 |
| 232651_at   | 1.77E-06    | 4.72E-05    | 0.999962467 | 0.999962467 |
| 232652_x_at | -0.00063887 | -0.01361477 | 0.989183598 | 0.9949255   |
| 232653_at   | 0.245564415 | 4.035392219 | 0.000160164 | 0.001092499 |
| 232654_s_at | -0.04638897 | -1.06345916 | 0.291939036 | 0.470394758 |
| 232655_at   | -0.06654535 | -1.5579605  | 0.124630457 | 0.256965509 |
| 232656_at   | 0.063736032 | 2.204601943 | 0.031423418 | 0.08835328  |
| 232657_at   | 0.073136304 | 1.970017768 | 0.053570822 | 0.134588071 |
| 232658_at   | -0.01860044 | -0.49307995 | 0.623799891 | 0.76908922  |
| 232659_at   | 0.043292301 | 0.97270802  | 0.334698876 | 0.517482951 |
| 232660_at   | 0.013478007 | 0.307127917 | 0.759835436 | 0.861717552 |
| 232661_s_at | -0.10631195 | -2.41062278 | 0.01908362  | 0.059351786 |
| 232662_x_at | -0.00778915 | -0.18251889 | 0.855805862 | 0.921009333 |
| 232663_s_at | 0.032912983 | 0.980215837 | 0.331011517 | 0.513559094 |
| 232664_at   | -0.05458373 | -1.31375023 | 0.194053375 | 0.354086206 |
| 232665_x_at | 0.124544958 | 4.111748491 | 0.000124085 | 0.000885453 |
| 232666_at   | -0.04838748 | -1.29133099 | 0.20166248  | 0.36391422  |
| 232667_at   | 0.001348935 | 0.046682484 | 0.962925112 | 0.981101794 |
| 232668_at   | 0.003629249 | 0.051758986 | 0.958896872 | 0.978964872 |
| 232669_at   | 0.110831175 | 2.296606686 | 0.025235677 | 0.074267937 |
| 232670_at   | 0.051516012 | 1.080985573 | 0.284134772 | 0.461597646 |
| 232671_at   | -0.07272481 | -1.84206966 | 0.070529495 | 0.166584092 |
| 232672_x_at | -0.09801468 | -1.88516346 | 0.064371796 | 0.155441124 |
| 232673_at   | -0.0782688  | -1.90043183 | 0.06230216  | 0.151524169 |
| 232674_at   | 0.017852814 | 0.51485849  | 0.608589648 | 0.757993717 |
| 232675_s_at | -0.10020594 | -2.48188846 | 0.015957685 | 0.051201153 |
| 232676_x_at | 0.064086729 | 1.928846841 | 0.058600647 | 0.144256685 |
| 232677_at   | 0.033171205 | 0.815758374 | 0.417943764 | 0.600390303 |
| 232678_at   | 0.001800008 | 0.042498918 | 0.966245536 | 0.982826835 |
| 232679_at   | 0.035661475 | 1.040316126 | 0.302468807 | 0.482094718 |
| 232680_at   | -0.0032573  | -0.09259413 | 0.926542022 | 0.961527074 |
| 232681_at   | -0.06125051 | -1.45681447 | 0.15050843  | 0.294947134 |
| 232682_at   | 0.027584912 | 0.764023431 | 0.44792051  | 0.627502033 |
| 232683_s_at | -0.13995977 | -3.43688666 | 0.00108874  | 0.005462892 |
| 232684_at   | -0.13286809 | -3.04077682 | 0.003526011 | 0.014724768 |
| 232685_at   | 0.092066139 | 2.79647458  | 0.006977762 | 0.025978851 |
| 232686_at   | -0.03168389 | -0.85628752 | 0.395328784 | 0.577953353 |
| 232687_at   | -0.45076153 | -6.46704174 | 2.21E-08    | 7.93E-07    |
| 232688_at   | -0.00501549 | -0.1570824  | 0.875720197 | 0.933249566 |
| 232689_at   | -0.02295925 | -0.70365646 | 0.484434978 | 0.659302839 |
| 232690_at   | 0.014223299 | 0.391089594 | 0.69715019  | 0.820764371 |

|             |             |             |             |             |
|-------------|-------------|-------------|-------------|-------------|
| 232691_at   | 0.074986149 | 1.833513125 | 0.071809379 | 0.168946344 |
| 232692_at   | 0.110042974 | 1.574561183 | 0.120744806 | 0.25072676  |
| 232693_s_at | 0.27653029  | 5.303942444 | 1.81E-06    | 2.61E-05    |
| 232694_at   | 0.026248337 | 0.709505893 | 0.480825835 | 0.656074624 |
| 232695_at   | 0.24403343  | 4.003211392 | 0.000178234 | 0.0011955   |
| 232696_at   | 0.327632632 | 6.050913724 | 1.09E-07    | 2.69E-06    |
| 232697_at   | -0.03356199 | -0.9541919  | 0.343908421 | 0.5267291   |
| 232698_at   | -0.03727878 | -1.03090845 | 0.306822381 | 0.487036259 |
| 232699_at   | -0.03512439 | -1.17498219 | 0.244756898 | 0.415919213 |
| 232700_at   | 0.160658895 | 4.039926836 | 0.000157765 | 0.001078601 |
| 232701_at   | 0.069711076 | 1.818752391 | 0.074063147 | 0.172973984 |
| 232702_at   | -0.08467661 | -2.59365068 | 0.011976825 | 0.040409805 |
| 232703_at   | 0.012731097 | 0.357404185 | 0.722073984 | 0.837466406 |
| 232704_s_at | 0.13915893  | 2.330699445 | 0.023233318 | 0.069542795 |
| 232705_at   | 0.13092721  | 3.065941117 | 0.003280398 | 0.013847884 |
| 232706_s_at | 0.03471512  | 0.629840702 | 0.531248451 | 0.698372085 |
| 232707_at   | -0.08136754 | -1.89620384 | 0.062869536 | 0.152555397 |
| 232708_at   | -0.06779584 | -1.54834281 | 0.126927004 | 0.260582557 |
| 232709_at   | -0.01394307 | -0.44295598 | 0.659429434 | 0.794066434 |
| 232710_at   | 0.151856967 | 2.27217266  | 0.026763564 | 0.077765893 |
| 232711_at   | -0.02924553 | -0.60670267 | 0.546393032 | 0.71034114  |
| 232712_at   | -0.01174803 | -0.61646816 | 0.539974521 | 0.705691765 |
| 232713_at   | -0.06917091 | -1.7021679  | 0.094026895 | 0.207771465 |
| 232714_at   | 0.005412513 | 0.141223954 | 0.88817767  | 0.939980497 |
| 232715_at   | 0.014647071 | 0.367518831 | 0.714556851 | 0.83255057  |
| 232716_at   | 0.20836884  | 3.292988058 | 0.001684125 | 0.007895409 |
| 232717_at   | -0.11526621 | -2.78702725 | 0.007159472 | 0.026533802 |
| 232718_at   | -0.02446734 | -0.72184884 | 0.473259683 | 0.649268732 |
| 232719_at   | 0.016046635 | 0.4311349   | 0.667953068 | 0.799932644 |
| 232720_at   | -0.08569269 | -1.52688008 | 0.132173755 | 0.268456165 |
| 232721_at   | 0.021761166 | 0.540520105 | 0.590888188 | 0.744815197 |
| 232722_at   | 0.150646263 | 3.694152911 | 0.000486963 | 0.002802026 |
| 232723_at   | -0.01066213 | -0.26980253 | 0.78826057  | 0.879166034 |
| 232724_at   | 0.175072131 | 3.527086504 | 0.000824017 | 0.004336154 |
| 232725_s_at | -0.02821577 | -0.63246796 | 0.529542729 | 0.697031887 |
| 232726_at   | 0.09374819  | 1.750238421 | 0.085314426 | 0.192998195 |
| 232727_at   | -0.00899098 | -0.25143333 | 0.802359254 | 0.888552872 |
| 232729_at   | -0.04270572 | -1.37039201 | 0.175794609 | 0.330416643 |
| 232730_at   | 0.023967121 | 0.806724955 | 0.42308895  | 0.604942616 |
| 232731_x_at | 0.211981884 | 3.443108952 | 0.001068151 | 0.005380724 |
| 232732_at   | -0.00616503 | -0.20898114 | 0.835188135 | 0.909017719 |
| 232733_s_at | 0.040803717 | 1.11333454  | 0.270113412 | 0.445811252 |
| 232734_at   | 0.114232871 | 2.872981528 | 0.005655483 | 0.021804247 |
| 232735_at   | -0.45624598 | -6.38326041 | 3.05E-08    | 1.01E-06    |
| 232736_s_at | 0.04662381  | 1.390197371 | 0.169730054 | 0.322050418 |
| 232737_s_at | -0.06798704 | -2.97344306 | 0.00427016  | 0.017328792 |
| 232738_at   | -0.07152014 | -2.08806731 | 0.041149943 | 0.109384304 |
| 232739_at   | 0.022072026 | 0.73253908  | 0.466761284 | 0.644180444 |
| 232740_at   | 0.018729475 | 0.695527326 | 0.489475623 | 0.663768309 |
| 232741_at   | 0.006394331 | 0.202849539 | 0.839955721 | 0.911842421 |
| 232742_at   | -0.05057772 | -1.52910903 | 0.131620974 | 0.267560157 |
| 232743_at   | -0.04139684 | -1.03108614 | 0.306739762 | 0.486939702 |
| 232744_x_at | 0.009714942 | 0.136832337 | 0.891632623 | 0.941941737 |
| 232745_x_at | 0.161784533 | 1.982239917 | 0.05215072  | 0.131828052 |
| 232746_at   | 0.120744871 | 3.330605879 | 0.001504115 | 0.007180292 |
| 232747_at   | -0.04444304 | -1.16053605 | 0.250539468 | 0.423187192 |
| 232748_at   | -0.02633725 | -0.76482112 | 0.447448983 | 0.627113332 |
| 232749_at   | 0.019201663 | 0.490097797 | 0.625895711 | 0.770890457 |
| 232750_at   | 0.098580103 | 2.772300667 | 0.007451427 | 0.027415757 |
| 232751_at   | -0.01429101 | -0.48604747 | 0.628747201 | 0.772975268 |
| 232752_at   | -0.39232041 | -5.35364756 | 1.51E-06    | 2.24E-05    |
| 232753_at   | 0.029905111 | 0.716689017 | 0.476414425 | 0.652264431 |
| 232754_at   | 0.056440051 | 1.82910009  | 0.072477072 | 0.170078514 |
| 232755_at   | -0.08483175 | -2.04957957 | 0.044892498 | 0.117274697 |
| 232756_at   | -0.04160783 | -1.27737764 | 0.206509652 | 0.370016814 |
| 232757_at   | -0.07180076 | -1.94868774 | 0.056128555 | 0.139640246 |
| 232758_s_at | 0.17267709  | 3.648364944 | 0.000563187 | 0.003167226 |
| 232759_at   | -0.06928655 | -1.80252102 | 0.076609621 | 0.177482356 |
| 232760_at   | -0.12242639 | -3.0661124  | 0.003278782 | 0.013842371 |
| 232761_at   | -0.00100818 | -0.03110396 | 0.975292389 | 0.987514779 |
| 232762_at   | 0.0462731   | 1.233946444 | 0.222151732 | 0.389166087 |
| 232763_at   | 0.03117029  | 0.858403007 | 0.394169551 | 0.576881343 |
| 232764_at   | 0.079600171 | 2.475155498 | 0.01623191  | 0.051924453 |
| 232765_x_at | 0.046836423 | 1.678985673 | 0.098483076 | 0.215031348 |
| 232766_at   | 0.006041151 | 0.163617375 | 0.870595687 | 0.930159402 |

|             |             |             |             |             |
|-------------|-------------|-------------|-------------|-------------|
| 232767_at   | 0.117521688 | 2.379737525 | 0.020601259 | 0.063048864 |
| 232768_at   | 0.104850427 | 2.917228638 | 0.0050007   | 0.019723878 |
| 232769_at   | -0.00788561 | -0.25863808 | 0.796821328 | 0.884694572 |
| 232770_at   | -0.1447941  | -3.43843467 | 0.001083583 | 0.005441491 |
| 232771_at   | 0.033688135 | 0.942124916 | 0.349998793 | 0.533133812 |
| 232772_at   | -0.06517286 | -1.66366338 | 0.101522267 | 0.220204032 |
| 232773_at   | 0.225535561 | 3.399973548 | 0.001218839 | 0.006014391 |
| 232774_x_at | 0.015413539 | 0.472296545 | 0.63847031  | 0.780057821 |
| 232775_at   | 0.003424061 | 0.121925623 | 0.90337532  | 0.948695862 |
| 232776_at   | 0.152952301 | 4.014903242 | 0.000171452 | 0.001157309 |
| 232777_s_at | 0.208689203 | 2.640798451 | 0.010586729 | 0.036502244 |
| 232778_at   | 0.041095189 | 1.138388453 | 0.259593697 | 0.433662075 |
| 232779_at   | -0.02792018 | -0.77795858 | 0.439724997 | 0.620233757 |
| 232780_s_at | 0.094017615 | 2.824137105 | 0.006469853 | 0.024382381 |
| 232781_at   | 0.028567332 | 0.721895172 | 0.473231409 | 0.649268732 |
| 232782_at   | 0.02192013  | 0.672787375 | 0.503728615 | 0.675847291 |
| 232783_at   | 0.05760058  | 1.695461708 | 0.095298608 | 0.209844712 |
| 232784_at   | 0.009497125 | 0.359356389 | 0.720620948 | 0.836562715 |
| 232785_at   | -0.06367619 | -1.57922854 | 0.119670026 | 0.248989423 |
| 232786_at   | -0.06892753 | -2.91304555 | 0.005059453 | 0.019904671 |
| 232787_at   | 0.011199491 | 0.34571549  | 0.73079531  | 0.842987609 |
| 232788_at   | 0.061138757 | 1.390027527 | 0.169781368 | 0.322086673 |
| 232789_at   | -0.03437768 | -0.97350848 | 0.334304453 | 0.517107158 |
| 232790_at   | 0.14282149  | 2.356916153 | 0.02179108  | 0.066030712 |
| 232791_at   | 0.081709012 | 2.290025313 | 0.025639408 | 0.075202837 |
| 232792_at   | -0.04563623 | -1.39211614 | 0.169151166 | 0.321252078 |
| 232793_at   | 0.24069844  | 4.430415197 | 4.18E-05    | 0.000354751 |
| 232794_at   | -0.05451921 | -1.28927306 | 0.202371975 | 0.364882074 |
| 232795_at   | 0.468747323 | 7.486103765 | 4.23E-10    | 5.22E-08    |
| 232796_at   | 0.155789147 | 4.535313481 | 2.90E-05    | 0.000260654 |
| 232797_at   | -0.01671578 | -0.23792454 | 0.812770059 | 0.894899535 |
| 232798_at   | -0.0314041  | -1.01580743 | 0.313899294 | 0.494964797 |
| 232799_at   | -0.01994858 | -0.53885217 | 0.592031324 | 0.745703847 |
| 232800_at   | -0.02426632 | -0.56202698 | 0.576242391 | 0.733527726 |
| 232801_at   | -0.04805324 | -2.0123257  | 0.048791949 | 0.125099524 |
| 232802_at   | 0.026462811 | 0.746410976 | 0.458405017 | 0.637054543 |
| 232803_at   | -0.03251891 | -0.83843541 | 0.405195208 | 0.587572493 |
| 232804_at   | -0.05257373 | -1.12111108 | 0.266816548 | 0.442060471 |
| 232805_at   | -0.08788695 | -3.3907757  | 0.001253477 | 0.006156086 |
| 232806_s_at | -0.34987614 | -5.90276888 | 1.92E-07    | 4.18E-06    |
| 232807_at   | 0.10026119  | 3.145298422 | 0.002606546 | 0.011396182 |
| 232808_at   | 0.033492142 | 1.154176492 | 0.253115887 | 0.42604155  |
| 232809_s_at | 0.152757496 | 4.07860465  | 0.00013866  | 0.00097039  |
| 232810_at   | 0.002194229 | 0.041994718 | 0.966645752 | 0.983103056 |
| 232811_x_at | -0.10677725 | -3.16047014 | 0.002493488 | 0.010969481 |
| 232812_at   | -0.06047233 | -1.72189418 | 0.090366858 | 0.201530721 |
| 232813_s_at | 0.004067759 | 0.154182415 | 0.877995991 | 0.934675653 |
| 232814_x_at | 0.306390144 | 6.369798918 | 3.21E-08    | 1.05E-06    |
| 232815_at   | -0.11328141 | -4.0292217  | 0.000163486 | 0.001111185 |
| 232816_s_at | 0.124104393 | 2.442582012 | 0.017619489 | 0.055571645 |
| 232817_at   | -0.03999042 | -1.23692741 | 0.221051033 | 0.387967828 |
| 232818_at   | -0.0367341  | -1.16270372 | 0.249665597 | 0.422109966 |
| 232819_s_at | -0.05028373 | -1.86068307 | 0.067811496 | 0.161806267 |
| 232820_s_at | -0.00090245 | -0.02022977 | 0.983928845 | 0.992153782 |
| 232821_x_at | -0.09273636 | -2.30283591 | 0.024858759 | 0.073339065 |
| 232822_x_at | -0.04777788 | -1.59114966 | 0.116959752 | 0.244923871 |
| 232823_at   | 0.038374846 | 0.982294383 | 0.32999545  | 0.512498059 |
| 232824_at   | 0.046700661 | 2.116036741 | 0.038603112 | 0.103918221 |
| 232825_s_at | -0.0805241  | -2.97906415 | 0.004202847 | 0.017097546 |
| 232826_at   | 0.058989054 | 1.584116191 | 0.118552773 | 0.24741352  |
| 232827_at   | 0.011296002 | 0.382683807 | 0.703339581 | 0.824986944 |
| 232828_at   | -0.08522493 | -2.10097135 | 0.039957327 | 0.106770002 |
| 232829_at   | 0.015200035 | 0.473239385 | 0.637801574 | 0.779475182 |
| 232830_at   | -0.07620224 | -2.31632047 | 0.024059917 | 0.071518844 |
| 232831_at   | -0.01755756 | -0.53774746 | 0.592789024 | 0.7461755   |
| 232832_at   | 0.002022704 | 0.055182232 | 0.956181103 | 0.977484008 |
| 232833_at   | -0.04129608 | -0.52897044 | 0.598825139 | 0.750748796 |
| 232834_at   | 0.015222606 | 0.420750614 | 0.675477161 | 0.805046142 |
| 232835_at   | 0.046998543 | 1.500250033 | 0.138921637 | 0.278416404 |
| 232836_at   | -0.01379008 | -0.39169    | 0.696708881 | 0.820495235 |
| 232837_at   | 0.070407529 | 2.028995947 | 0.047012351 | 0.12154081  |
| 232838_at   | 0.00199072  | 0.051049713 | 0.959459623 | 0.97922287  |
| 232839_at   | -0.00396756 | -0.14848468 | 0.882470347 | 0.937091377 |
| 232840_at   | 0.024833425 | 0.790300656 | 0.432540661 | 0.613393851 |
| 232841_at   | -0.0114395  | -0.40944958 | 0.683703439 | 0.810914077 |

|             |             |             |             |             |
|-------------|-------------|-------------|-------------|-------------|
| 232842_at   | -0.04998392 | -1.75260562 | 0.084903277 | 0.192252989 |
| 232843_s_at | 0.211364865 | 2.212710008 | 0.0308289   | 0.086956313 |
| 232844_at   | -0.01750615 | -0.58493713 | 0.560836883 | 0.722290415 |
| 232845_at   | 0.047282086 | 1.64609513  | 0.105100765 | 0.226086032 |
| 232846_s_at | 0.176471103 | 3.817493724 | 0.000327627 | 0.002003328 |
| 232847_at   | 0.065825792 | 1.773384847 | 0.081364314 | 0.186096926 |
| 232848_at   | -0.01160561 | -0.33589174 | 0.7381529   | 0.848016282 |
| 232849_at   | -0.04479557 | -1.13845563 | 0.259565888 | 0.4336575   |
| 232850_at   | 0.091472384 | 1.730753571 | 0.088761763 | 0.198813844 |
| 232851_at   | 0.007477443 | 0.373205523 | 0.710342927 | 0.829782432 |
| 232852_at   | -0.25599229 | -4.47166805 | 3.62E-05    | 0.000314836 |
| 232853_at   | -0.11947288 | -4.05021077 | 0.000152451 | 0.001047558 |
| 232854_at   | -0.14362248 | -3.50894038 | 0.000871789 | 0.004544826 |
| 232855_at   | -0.00991972 | -0.28808238 | 0.774300735 | 0.870830149 |
| 232856_at   | -0.01898761 | -0.42996398 | 0.66879978  | 0.800482051 |
| 232857_at   | -0.02999278 | -1.18604696 | 0.24039327  | 0.410376471 |
| 232858_at   | 0.077649183 | 2.410744984 | 0.01907782  | 0.059341213 |
| 232859_s_at | -0.03270256 | -0.9562144  | 0.34289447  | 0.525788775 |
| 232860_x_at | 0.050347828 | 2.049705374 | 0.0448798   | 0.117255234 |
| 232861_at   | 0.099955345 | 2.593929447 | 0.01196814  | 0.040388965 |
| 232862_at   | 0.099756248 | 3.214682233 | 0.002125998 | 0.009596517 |
| 232863_at   | -0.07034172 | -1.83858149 | 0.071048918 | 0.167545284 |
| 232864_s_at | -0.01688065 | -0.45260879 | 0.652502659 | 0.789325994 |
| 232865_at   | 0.026556715 | 0.613185895 | 0.542127513 | 0.707058184 |
| 232866_at   | -0.01331762 | -0.37690025 | 0.707609933 | 0.827734454 |
| 232867_at   | 0.100391918 | 1.906494661 | 0.061496144 | 0.149914671 |
| 232868_at   | 0.016152098 | 0.387455821 | 0.699823321 | 0.82261129  |
| 232869_at   | 0.10067163  | 3.303036769 | 0.001634145 | 0.007704739 |
| 232870_at   | 0.077798897 | 2.263045633 | 0.027354975 | 0.079042865 |
| 232871_at   | -0.00374366 | -0.11272554 | 0.91063365  | 0.952869107 |
| 232872_at   | 0.026309563 | 1.278283789 | 0.206192259 | 0.369596296 |
| 232873_at   | -0.05062037 | -1.54664506 | 0.127335885 | 0.261158064 |
| 232874_at   | 0.545877237 | 5.42144666  | 1.17E-06    | 1.81E-05    |
| 232875_at   | -0.00707162 | -0.37015741 | 0.712600506 | 0.831159585 |
| 232876_at   | -0.09348527 | -1.84249788 | 0.070465949 | 0.166473908 |
| 232877_at   | -0.00660031 | -0.17713646 | 0.860012392 | 0.923668024 |
| 232878_at   | 0.133177997 | 4.23190576  | 8.27E-05    | 0.000628058 |
| 232879_at   | -0.01300729 | -0.25636965 | 0.798563839 | 0.885892313 |
| 232880_at   | 0.014155916 | 0.43979835  | 0.661701878 | 0.795737281 |
| 232881_at   | 0.006463387 | 0.215981736 | 0.829752466 | 0.905575024 |
| 232882_at   | 0.040421879 | 0.766605507 | 0.446395258 | 0.626292607 |
| 232883_at   | 0.061381765 | 1.06061639  | 0.293218681 | 0.471800485 |
| 232884_s_at | 0.152163577 | 3.939057764 | 0.000220297 | 0.001431865 |
| 232885_at   | 0.088752913 | 2.829652156 | 0.006372761 | 0.024075354 |
| 232886_at   | 0.019393342 | 0.462954391 | 0.645112739 | 0.784591355 |
| 232887_at   | 0.347886394 | 3.956260317 | 0.000208163 | 0.001362511 |
| 232888_at   | -0.03147003 | -0.81063867 | 0.420855149 | 0.602790062 |
| 232889_at   | 0.64567013  | 5.264341885 | 2.10E-06    | 2.94E-05    |
| 232890_at   | 0.056286031 | 1.24904874  | 0.216616618 | 0.382725041 |
| 232891_at   | -0.00680773 | -0.18686579 | 0.852411687 | 0.919044663 |
| 232892_at   | -0.02753118 | -0.80656524 | 0.42318026  | 0.604960674 |
| 232893_at   | -0.09864219 | -2.72426276 | 0.008481569 | 0.030534741 |
| 232894_at   | 0.049130413 | 1.598835552 | 0.115238727 | 0.242182318 |
| 232895_s_at | -0.00706366 | -0.19745408 | 0.844155914 | 0.914372314 |
| 232896_at   | 0.434792143 | 5.040928442 | 4.76E-06    | 5.79E-05    |
| 232897_at   | -0.11837294 | -2.57061553 | 0.012714642 | 0.042437849 |
| 232898_at   | -0.07202296 | -1.91376123 | 0.060541782 | 0.148107374 |
| 232899_at   | 0.119676093 | 2.604347513 | 0.011647625 | 0.039504867 |
| 232900_at   | 0.022796357 | 0.606294544 | 0.546662118 | 0.710463632 |
| 232901_at   | 0.055198324 | 1.80825224  | 0.075702232 | 0.175919518 |
| 232902_s_at | 0.019776737 | 0.39791054  | 0.692142884 | 0.81719414  |
| 232903_at   | 0.031140633 | 1.316605478 | 0.193100028 | 0.352894151 |
| 232904_at   | -0.17467187 | -4.25382376 | 7.67E-05    | 0.000590481 |
| 232905_at   | -0.14263855 | -3.66374819 | 0.000536388 | 0.003039466 |
| 232906_at   | 0.014815647 | 0.505331766 | 0.615222345 | 0.763276713 |
| 232907_at   | -0.04337692 | -1.26735207 | 0.210045589 | 0.374684978 |
| 232908_at   | -0.04868675 | -1.23279847 | 0.222576684 | 0.389655191 |
| 232909_s_at | 0.227598442 | 4.356867535 | 5.39E-05    | 0.000439184 |
| 232910_at   | 0.007026024 | 0.216014862 | 0.829726765 | 0.905569088 |
| 232911_at   | 0.019784751 | 0.664943577 | 0.508696612 | 0.679803515 |
| 232912_at   | 0.014720336 | 0.452684907 | 0.65244816  | 0.789281431 |
| 232913_at   | 0.008018813 | 0.19626399  | 0.845082982 | 0.914911185 |
| 232914_s_at | 0.241769331 | 3.452591873 | 0.001037481 | 0.005255847 |
| 232915_at   | 0.042451809 | 1.100846382 | 0.275467533 | 0.4518533   |
| 232916_at   | 0.123742215 | 2.17897872  | 0.033369035 | 0.092675175 |

|             |             |             |             |             |
|-------------|-------------|-------------|-------------|-------------|
| 232917_at   | 0.016907376 | 0.568270124 | 0.572024054 | 0.730348292 |
| 232918_at   | -0.05198646 | -1.72915713 | 0.089049243 | 0.199378227 |
| 232919_at   | 0.033743932 | 0.91534124  | 0.363766033 | 0.546946291 |
| 232920_at   | -0.0345034  | -1.09064604 | 0.279895571 | 0.457003246 |
| 232921_at   | -0.12216533 | -3.06378493 | 0.0033008   | 0.013928747 |
| 232922_s_at | 0.061217456 | 1.373459127 | 0.174844731 | 0.329058859 |
| 232923_at   | 0.088001904 | 1.938990459 | 0.057325442 | 0.141946294 |
| 232924_at   | -0.07929098 | -1.4281848  | 0.15854995  | 0.306285471 |
| 232925_at   | 0.101691713 | 1.857091521 | 0.068328958 | 0.162754239 |
| 232926_x_at | -0.0935616  | -2.56751532 | 0.012817032 | 0.04269669  |
| 232927_at   | 0.336875862 | 5.008445108 | 5.35E-06    | 6.37E-05    |
| 232928_at   | 0.13397643  | 4.720730755 | 1.51E-05    | 0.000150492 |
| 232929_at   | 0.259569782 | 5.42506906  | 1.16E-06    | 1.80E-05    |
| 232930_at   | 0.204303433 | 3.32333251  | 0.001537437 | 0.007312028 |
| 232931_at   | 0.010888507 | 0.246657226 | 0.806036042 | 0.890807458 |
| 232932_at   | 0.023220649 | 0.567817159 | 0.572329604 | 0.730586235 |
| 232933_at   | -0.04188242 | -1.50986626 | 0.136454208 | 0.274740346 |
| 232934_at   | -0.00903559 | -0.27248098 | 0.786210617 | 0.878150451 |
| 232935_at   | 0.522037468 | 6.637263297 | 1.14E-08    | 4.94E-07    |
| 232936_at   | 0.015526195 | 0.567427356 | 0.572592612 | 0.730796727 |
| 232937_at   | -0.03911225 | -1.12092322 | 0.266895852 | 0.442125705 |
| 232938_at   | -0.01955719 | -0.47138632 | 0.6391162   | 0.78062306  |
| 232939_at   | 0.011315551 | 0.33452914  | 0.7391754   | 0.848820036 |
| 232940_s_at | 0.112486653 | 3.184681296 | 0.002322552 | 0.010333449 |
| 232941_at   | -0.02123946 | -0.56393193 | 0.574953667 | 0.732534047 |
| 232942_at   | 0.130848353 | 3.009261954 | 0.003857816 | 0.015908242 |
| 232943_at   | -0.03153329 | -0.79924789 | 0.427376319 | 0.608619395 |
| 232944_at   | -0.02760269 | -0.62119425 | 0.536882186 | 0.703068995 |
| 232945_at   | 0.07268103  | 3.106709695 | 0.002916138 | 0.012528944 |
| 232946_s_at | 0.110646734 | 2.603225973 | 0.01168175  | 0.03958156  |
| 232947_at   | -0.17683956 | -2.76968233 | 0.007504469 | 0.027574191 |
| 232948_at   | 0.06855399  | 2.103067177 | 0.039766493 | 0.106402689 |
| 232949_at   | 0.094208164 | 3.618134231 | 0.000619621 | 0.003430638 |
| 232950_s_at | -0.19840933 | -4.49006306 | 3.40E-05    | 0.000298067 |
| 232951_at   | 0.008981272 | 0.473745808 | 0.637442503 | 0.779142882 |
| 232952_at   | -0.04000396 | -1.03262796 | 0.306023483 | 0.486078882 |
| 232953_at   | 0.05448144  | 1.395662434 | 0.168085255 | 0.319825708 |
| 232954_at   | 0.063268708 | 2.302759237 | 0.024863367 | 0.073399407 |
| 232955_at   | -0.04639151 | -1.66826278 | 0.100602028 | 0.218575879 |
| 232956_at   | -0.05063785 | -1.46357476 | 0.148656937 | 0.292406841 |
| 232957_x_at | 0.188418811 | 4.563183684 | 2.63E-05    | 0.000240495 |
| 232958_at   | 0.001600059 | 0.05599173  | 0.955538978 | 0.977177865 |
| 232959_at   | -0.15696391 | -4.33278296 | 5.86E-05    | 0.000469847 |
| 232960_at   | 0.043454364 | 1.648736136 | 0.104556346 | 0.225240152 |
| 232961_at   | 0.151007591 | 4.948933579 | 6.64E-06    | 7.63E-05    |
| 232962_x_at | 0.06944288  | 2.346588085 | 0.02234943  | 0.06734363  |
| 232963_at   | 0.032692257 | 0.975523897 | 0.333312727 | 0.516018165 |
| 232964_at   | 0.026159506 | 0.79219032  | 0.43144687  | 0.61232847  |
| 232965_at   | 0.029399557 | 0.72557241  | 0.470990417 | 0.64749773  |
| 232966_at   | -0.0696658  | -1.88350556 | 0.06459999  | 0.15584974  |
| 232967_at   | -0.02215561 | -0.76248697 | 0.448829551 | 0.628317631 |
| 232968_at   | 0.256244455 | 2.705858356 | 0.008909718 | 0.031766502 |
| 232969_at   | 0.018640732 | 0.517181471 | 0.606977308 | 0.756702554 |
| 232970_at   | -0.04867698 | -1.21595236 | 0.2288815   | 0.396510271 |
| 232971_at   | 0.00452302  | 0.205803181 | 0.837658372 | 0.91038568  |
| 232972_at   | 0.127706417 | 2.795783608 | 0.006990907 | 0.026014787 |
| 232973_at   | 0.012021786 | 0.389880851 | 0.698038957 | 0.821205009 |
| 232974_at   | 0.013157837 | 0.345249517 | 0.731143738 | 0.843211846 |
| 232975_at   | 0.010134816 | 0.164427294 | 0.869960959 | 0.929816936 |
| 232976_at   | 0.045055503 | 0.989217337 | 0.32662622  | 0.508839202 |
| 232977_x_at | 0.071008901 | 2.142785599 | 0.036297075 | 0.099101282 |
| 232978_at   | 0.137184104 | 1.816047715 | 0.074482479 | 0.173699173 |
| 232979_at   | -0.01243892 | -0.35870065 | 0.7211089   | 0.836955252 |
| 232980_at   | 0.070706762 | 2.138061215 | 0.036695394 | 0.099905121 |
| 232981_s_at | -0.00094582 | -0.0398471  | 0.96835055  | 0.983937859 |
| 232982_at   | -0.03244497 | -1.17500762 | 0.244746802 | 0.415917871 |
| 232983_s_at | -0.0524668  | -1.2282846  | 0.224253404 | 0.391375083 |
| 232984_at   | 0.185349216 | 1.761928406 | 0.083299997 | 0.189303543 |
| 232985_s_at | -0.03419925 | -1.12213398 | 0.266385009 | 0.441655989 |
| 232986_at   | -0.1214489  | -4.14369402 | 0.000111444 | 0.000806979 |
| 232987_at   | -0.01229652 | -0.40407037 | 0.687632732 | 0.813717851 |
| 232988_at   | 0.043476708 | 0.944304043 | 0.348893794 | 0.532012742 |
| 232989_s_at | 0.026772048 | 0.908215991 | 0.367486278 | 0.550668793 |
| 232990_at   | -0.00364975 | -0.09549469 | 0.924247912 | 0.960347988 |
| 232991_at   | 0.096918624 | 0.946383915 | 0.347841248 | 0.530878703 |

|             |             |             |             |             |
|-------------|-------------|-------------|-------------|-------------|
| 232992_at   | 0.029007837 | 0.992423462 | 0.325073672 | 0.507251581 |
| 232993_at   | -0.03692898 | -1.68944584 | 0.096451405 | 0.211812991 |
| 232994_s_at | -0.03810972 | -1.3844803  | 0.171463916 | 0.324403748 |
| 232995_at   | -0.11621965 | -2.60359208 | 0.0116706   | 0.039549778 |
| 232996_at   | -0.00325284 | -0.10425169 | 0.917325811 | 0.956134268 |
| 232997_at   | 0.160660387 | 3.388583653 | 0.001261868 | 0.006191176 |
| 232998_at   | -0.06350471 | -1.68447726 | 0.097412118 | 0.213314832 |
| 232999_at   | -0.17336597 | -4.44078991 | 4.03E-05    | 0.000344625 |
| 233000_x_at | 0.003023109 | 0.098881269 | 0.921570212 | 0.958881008 |
| 233001_at   | -0.06213269 | -1.70875866 | 0.092790703 | 0.205673863 |
| 233002_at   | -1.04821125 | -6.97926459 | 3.04E-09    | 1.93E-07    |
| 233003_at   | -0.01846983 | -0.64774009 | 0.519684319 | 0.688965963 |
| 233004_x_at | 0.423013623 | 7.257197586 | 1.03E-09    | 9.56E-08    |
| 233005_at   | 0.071863801 | 1.845588548 | 0.070008738 | 0.165730734 |
| 233006_at   | 0.277325341 | 5.48573449  | 9.22E-07    | 1.50E-05    |
| 233007_at   | 0.154277666 | 3.582093096 | 0.000693961 | 0.003768929 |
| 233008_at   | -0.04844628 | -1.55118645 | 0.126244499 | 0.259539037 |
| 233009_at   | -0.08119762 | -2.44074556 | 0.017700805 | 0.055780877 |
| 233010_at   | 0.027013425 | 0.869344964 | 0.388207402 | 0.570922545 |
| 233011_at   | 0.035583256 | 0.761819251 | 0.449224937 | 0.628656089 |
| 233012_at   | -0.02583268 | -0.78549429 | 0.435330133 | 0.616020463 |
| 233013_x_at | -0.00394893 | -0.06201673 | 0.950760675 | 0.974752158 |
| 233014_at   | 0.191009417 | 3.619900357 | 0.000616181 | 0.003413705 |
| 233015_at   | 0.046947359 | 1.372771366 | 0.175057386 | 0.32936199  |
| 233016_at   | 0.043073113 | 1.263730902 | 0.211333733 | 0.37627259  |
| 233017_x_at | 0.246697122 | 5.360364178 | 1.47E-06    | 2.19E-05    |
| 233018_at   | 0.110220051 | 2.734832542 | 0.008244293 | 0.029822253 |
| 233019_at   | 0.046934278 | 1.076360151 | 0.286180202 | 0.464094763 |
| 233020_at   | -0.00363666 | -0.10010744 | 0.920600927 | 0.958253247 |
| 233021_at   | -0.11488448 | -3.20736067 | 0.002172469 | 0.009772723 |
| 233022_at   | 0.08062089  | 2.689418824 | 0.009308804 | 0.032934538 |
| 233023_at   | -0.03316011 | -1.05997447 | 0.293508166 | 0.472068868 |
| 233024_at   | 0.069271405 | 2.230286177 | 0.029574046 | 0.084148675 |
| 233025_at   | -0.12240952 | -1.58304332 | 0.118797296 | 0.247667207 |
| 233026_s_at | -0.20225933 | -2.98885055 | 0.004088004 | 0.01670181  |
| 233027_at   | 0.194191491 | 3.416830679 | 0.001157698 | 0.005755904 |
| 233028_at   | -0.00213355 | -0.07159874 | 0.943165187 | 0.970700235 |
| 233029_at   | -0.33238444 | -6.50903096 | 1.88E-08    | 7.04E-07    |
| 233030_at   | -0.09516876 | -2.87091265 | 0.005687959 | 0.021912443 |
| 233031_at   | 0.107540308 | 2.368264633 | 0.021191952 | 0.064569862 |
| 233032_x_at | -0.03329274 | -1.02735734 | 0.308476741 | 0.488984979 |
| 233033_at   | -0.05008617 | -1.59514673 | 0.116062161 | 0.243478987 |
| 233034_at   | -0.07308933 | -2.16486364 | 0.034485352 | 0.095166371 |
| 233035_at   | -0.16295843 | -4.48108658 | 3.50E-05    | 0.000306701 |
| 233036_at   | -0.02192537 | -0.57071838 | 0.570373949 | 0.728880924 |
| 233037_at   | 0.273823572 | 5.79154654  | 2.92E-07    | 5.85E-06    |
| 233038_at   | 0.139255662 | 3.148190877 | 0.002584628 | 0.011316957 |
| 233039_at   | 0.056246063 | 1.609584437 | 0.112866161 | 0.238407647 |
| 233040_at   | -0.03723384 | -1.36203843 | 0.178401706 | 0.333936542 |
| 233041_x_at | 0.244940856 | 5.821105324 | 2.61E-07    | 5.34E-06    |
| 233042_at   | 0.016584439 | 0.327040048 | 0.744803625 | 0.852130241 |
| 233043_at   | -0.04428126 | -1.04897988 | 0.298496949 | 0.477706283 |
| 233044_at   | 0.041016944 | 0.95450391  | 0.343751872 | 0.526583698 |
| 233045_at   | 0.01052168  | 0.411635697 | 0.682109069 | 0.809963831 |
| 233046_at   | 0.012559117 | 0.608619084 | 0.545130387 | 0.709339289 |
| 233047_at   | 0.032254191 | 1.10832277  | 0.272253279 | 0.448193    |
| 233048_at   | -0.06753894 | -1.94162318 | 0.056998364 | 0.14132747  |
| 233049_x_at | -0.05497178 | -1.60911507 | 0.112968932 | 0.238567666 |
| 233050_at   | -0.17407484 | -4.22092273 | 8.58E-05    | 0.000647656 |
| 233051_at   | -0.35149518 | -5.3610844  | 1.47E-06    | 2.19E-05    |
| 233052_at   | -0.01273667 | -0.36482301 | 0.716557629 | 0.833954377 |
| 233053_at   | -0.01520063 | -0.56631246 | 0.573345181 | 0.73136535  |
| 233054_at   | -0.01505146 | -0.443162   | 0.659281278 | 0.794066434 |
| 233055_at   | 0.143358913 | 3.542704753 | 0.000784904 | 0.004167629 |
| 233056_x_at | 0.319464046 | 6.33678504  | 3.64E-08    | 1.16E-06    |
| 233057_at   | 0.432840317 | 3.645653155 | 0.000568042 | 0.003190513 |
| 233058_at   | 0.147334439 | 3.097925231 | 0.00299127  | 0.012810064 |
| 233059_at   | 0.337855926 | 4.45338388  | 3.86E-05    | 0.000332734 |
| 233060_at   | -0.01473354 | -0.45093406 | 0.653702251 | 0.790079508 |
| 233061_at   | 0.023855831 | 0.622178788 | 0.536239144 | 0.702535685 |
| 233062_at   | 0.044689572 | 1.13941623  | 0.259168451 | 0.433226795 |
| 233063_s_at | 0.052074592 | 1.885255476 | 0.064359151 | 0.155418985 |
| 233064_at   | -0.18678443 | -3.84175014 | 0.00030283  | 0.001878427 |
| 233065_at   | -0.04288325 | -1.20764166 | 0.232039475 | 0.40041439  |
| 233066_at   | -0.03156506 | -1.05259034 | 0.296852342 | 0.475864876 |



|             |             |             |             |             |
|-------------|-------------|-------------|-------------|-------------|
| 233067_at   | 0.031679321 | 0.991212092 | 0.325659691 | 0.507829132 |
| 233068_at   | -0.11401376 | -1.98180393 | 0.052200816 | 0.131932301 |
| 233069_at   | -0.07008071 | -1.87244374 | 0.066140133 | 0.158716431 |
| 233070_at   | -0.0532347  | -2.00534648 | 0.049554057 | 0.12659597  |
| 233071_at   | 0.073117572 | 1.512599732 | 0.135759194 | 0.273747965 |
| 233072_at   | 0.185501559 | 2.759329592 | 0.00771761  | 0.028225484 |
| 233073_at   | -0.00643623 | -0.1716316  | 0.864318825 | 0.92644968  |
| 233074_at   | -0.00468175 | -0.14280319 | 0.886935787 | 0.939266722 |
| 233075_at   | 0.011868694 | 0.365464656 | 0.716081231 | 0.833739803 |
| 233076_at   | -0.00993005 | -0.13556984 | 0.892626246 | 0.942525696 |
| 233077_at   | -0.00814207 | -0.25629587 | 0.798620531 | 0.885892313 |
| 233078_at   | -0.0660874  | -2.20151181 | 0.031652641 | 0.088888461 |
| 233079_at   | -0.0108896  | -0.25692958 | 0.79813363  | 0.885678691 |
| 233080_s_at | 0.136127755 | 1.900642785 | 0.062273965 | 0.151496818 |
| 233081_at   | 0.024221826 | 0.530689494 | 0.597640664 | 0.749915954 |
| 233082_at   | -0.04610347 | -1.27447509 | 0.207528769 | 0.371292064 |
| 233083_at   | -0.00657947 | -0.26411105 | 0.792621521 | 0.881914034 |
| 233084_s_at | -0.2071811  | -4.13067479 | 0.000116438 | 0.000838113 |
| 233085_s_at | 0.13890763  | 3.168581091 | 0.002434949 | 0.010747927 |
| 233086_at   | 0.018412712 | 0.700708868 | 0.486259352 | 0.660925853 |
| 233087_at   | -0.03014129 | -0.94213676 | 0.349992783 | 0.533133812 |
| 233088_at   | -0.00394589 | -0.10432136 | 0.917270767 | 0.956099193 |
| 233089_at   | 0.049902698 | 1.496623642 | 0.139861235 | 0.279822649 |
| 233090_at   | 0.071454601 | 1.514330493 | 0.135320582 | 0.273134651 |
| 233091_at   | 0.00988742  | 0.2523576   | 0.801648237 | 0.888088419 |
| 233092_s_at | 0.014696659 | 0.464638803 | 0.643912924 | 0.78366528  |
| 233093_s_at | 0.090301135 | 1.815515358 | 0.074565249 | 0.173842132 |
| 233094_at   | 0.012573726 | 0.298219736 | 0.766590929 | 0.866038468 |
| 233095_at   | -0.56758993 | -7.04632773 | 2.34E-09    | 1.62E-07    |
| 233096_at   | -0.02584768 | -0.55600175 | 0.580327713 | 0.736797425 |
| 233097_x_at | 0.008414345 | 0.303110572 | 0.762879687 | 0.863660377 |
| 233098_s_at | -0.24491502 | -4.73887108 | 1.41E-05    | 0.000142318 |
| 233099_at   | 0.020414873 | 0.64648106  | 0.520493355 | 0.689473139 |
| 233100_at   | 0.037188217 | 1.102938359 | 0.274565484 | 0.450870099 |
| 233101_at   | 0.185153439 | 5.028627025 | 4.98E-06    | 5.99E-05    |
| 233102_at   | -0.03730518 | -1.74693719 | 0.085890558 | 0.193977505 |
| 233103_at   | -0.03133753 | -1.06872341 | 0.289579567 | 0.467824249 |
| 233104_at   | -0.00310749 | -0.09181026 | 0.927162111 | 0.961875684 |
| 233105_at   | 0.070904289 | 1.670017273 | 0.100252793 | 0.217991048 |
| 233106_at   | 0.260923405 | 6.485331825 | 2.06E-08    | 7.54E-07    |
| 233107_at   | -0.0021745  | -0.06018083 | 0.952216506 | 0.975500605 |
| 233108_at   | 0.056593483 | 1.896979097 | 0.062765174 | 0.152409733 |
| 233109_at   | -0.08960942 | -1.97197449 | 0.053341266 | 0.134147085 |
| 233110_s_at | 0.012521931 | 0.370222993 | 0.712551903 | 0.831159585 |
| 233111_at   | 0.055006848 | 1.83091412  | 0.07220198  | 0.169655673 |
| 233112_at   | 0.140180396 | 2.896763721 | 0.005294284 | 0.020661209 |
| 233113_at   | 0.05751365  | 1.776700981 | 0.080811057 | 0.185093562 |
| 233114_at   | 0.02234864  | 0.577884465 | 0.565557474 | 0.725975092 |
| 233115_at   | -0.06025386 | -1.58506231 | 0.118337474 | 0.247102667 |
| 233116_at   | -0.07402285 | -2.26330899 | 0.027337749 | 0.079007935 |
| 233117_at   | 0.044321693 | 1.227526335 | 0.224535974 | 0.39168469  |
| 233118_at   | -0.03947869 | -1.46603912 | 0.147986456 | 0.291434331 |
| 233119_at   | -0.08060861 | -2.16527831 | 0.034452096 | 0.095086339 |
| 233120_at   | -0.00980648 | -0.30758192 | 0.759491643 | 0.861502551 |
| 233121_at   | 0.157073439 | 4.741674685 | 1.40E-05    | 0.000141127 |
| 233122_at   | 0.122923785 | 3.570116561 | 0.000720493 | 0.003887515 |
| 233123_at   | 0.09080657  | 2.85952503  | 0.005869825 | 0.022485147 |
| 233124_s_at | -0.18206245 | -2.96662296 | 0.004353177 | 0.017600162 |
| 233125_at   | 0.018367978 | 0.648631482 | 0.519111925 | 0.688472614 |
| 233126_s_at | 0.042627551 | 1.320577077 | 0.191779813 | 0.351141932 |
| 233127_at   | 0.033534617 | 0.829532633 | 0.410171495 | 0.592366848 |
| 233128_at   | 0.035188594 | 0.936541547 | 0.352840408 | 0.536000799 |
| 233129_at   | -0.17453309 | -5.04834856 | 4.63E-06    | 5.67E-05    |
| 233130_at   | -0.02234122 | -0.43395925 | 0.665912506 | 0.798801621 |
| 233131_at   | -0.0056447  | -0.16176048 | 0.872051241 | 0.930982349 |
| 233132_at   | -0.03994509 | -1.00268531 | 0.320137593 | 0.501897404 |
| 233133_at   | -0.12230032 | -2.82151585 | 0.006516476 | 0.024531197 |
| 233134_at   | 0.053501949 | 1.976067151 | 0.052863851 | 0.13318627  |
| 233135_at   | -0.05393637 | -1.58647498 | 0.118016594 | 0.246605461 |
| 233136_at   | -0.00319396 | -0.12885794 | 0.897911556 | 0.945357094 |
| 233137_at   | 0.062882796 | 1.71031703  | 0.092500374 | 0.205172798 |
| 233138_at   | 0.065835559 | 1.234965585 | 0.22177497  | 0.38874988  |
| 233139_at   | -0.83359337 | -5.66237926 | 4.75E-07    | 8.69E-06    |
| 233140_s_at | -0.11585036 | -3.47485971 | 0.000968714 | 0.004965449 |
| 233141_s_at | 0.012374428 | 0.374752583 | 0.709198096 | 0.828965119 |

|             |             |             |             |             |
|-------------|-------------|-------------|-------------|-------------|
| 233142_at   | -0.00045458 | -0.01353071 | 0.989250373 | 0.9949255   |
| 233143_at   | -0.01872637 | -0.4651217  | 0.643569131 | 0.783481561 |
| 233144_s_at | -0.12173158 | -3.34317842 | 0.001448119 | 0.006959815 |
| 233145_at   | -0.05529119 | -1.25569712 | 0.214212465 | 0.379858884 |
| 233146_at   | -0.05570652 | -1.34094898 | 0.185114785 | 0.342616059 |
| 233147_at   | 0.032205568 | 0.965156683 | 0.338434897 | 0.521167817 |
| 233148_at   | 0.007766294 | 0.181921524 | 0.856272515 | 0.921378419 |
| 233149_at   | 0.007356269 | 0.219660574 | 0.826899332 | 0.903931055 |
| 233150_at   | -0.22651837 | -5.1485954  | 3.21E-06    | 4.19E-05    |
| 233151_s_at | 0.005130191 | 0.131718926 | 0.895658079 | 0.944141116 |
| 233152_x_at | 0.144844219 | 3.332323709 | 0.001496345 | 0.007148622 |
| 233153_at   | -0.01307629 | -0.39276516 | 0.695918877 | 0.81996637  |
| 233154_at   | -0.05922217 | -1.52198418 | 0.133394422 | 0.270284423 |
| 233155_at   | -0.01373756 | -0.36178601 | 0.718814009 | 0.83548505  |
| 233156_at   | -0.04266179 | -1.29386861 | 0.200790168 | 0.362823522 |
| 233157_x_at | 0.206845147 | 3.174081854 | 0.002395986 | 0.010603168 |
| 233158_at   | 0.00919134  | 0.254338095 | 0.800125264 | 0.886938697 |
| 233159_at   | -0.02448899 | -0.72208041 | 0.473118376 | 0.649240948 |
| 233160_at   | -0.05875849 | -1.28797549 | 0.202820284 | 0.36547844  |
| 233161_at   | 0.224621598 | 4.527693934 | 2.98E-05    | 0.000266789 |
| 233162_at   | -0.00653117 | -0.18359581 | 0.854964714 | 0.92068603  |
| 233163_at   | 0.022984733 | 0.47801552  | 0.634418615 | 0.777104553 |
| 233164_x_at | 0.015234527 | 0.355751014 | 0.723305254 | 0.838176639 |
| 233165_at   | -0.01025287 | -0.23495123 | 0.815066129 | 0.896418685 |
| 233166_at   | -0.00057072 | -0.02399311 | 0.98093967  | 0.990424012 |
| 233167_at   | 0.041583394 | 0.787118897 | 0.434386068 | 0.615113024 |
| 233168_s_at | 0.053321553 | 1.930276246 | 0.0584195   | 0.143945544 |
| 233169_at   | 0.102335799 | 2.161188439 | 0.034781329 | 0.095817491 |
| 233170_at   | -0.06976513 | -2.13235065 | 0.037181953 | 0.100919219 |
| 233171_at   | 0.024777915 | 0.822018485 | 0.414400455 | 0.59662345  |
| 233172_at   | -0.00308727 | -0.08575169 | 0.9319563   | 0.9646569   |
| 233173_x_at | 0.164834272 | 5.833511014 | 2.49E-07    | 5.14E-06    |
| 233174_at   | -0.03089997 | -1.29298726 | 0.201092812 | 0.363238217 |
| 233175_at   | -0.07195859 | -2.80222192 | 0.006869306 | 0.025641277 |
| 233176_at   | -0.05860387 | -1.9420586  | 0.056944424 | 0.14122192  |
| 233177_s_at | -0.66877072 | -8.08917293 | 4.07E-11    | 1.29E-08    |
| 233178_at   | -0.06426321 | -1.86477831 | 0.067225503 | 0.160768523 |
| 233179_x_at | 0.04709789  | 1.720278043 | 0.090662231 | 0.202028142 |
| 233180_at   | 0.19465027  | 3.575729333 | 0.000707941 | 0.003828106 |
| 233181_at   | 0.021331117 | 0.720907567 | 0.473834302 | 0.64990801  |
| 233182_x_at | -0.01396465 | -0.63239105 | 0.529592624 | 0.697061758 |
| 233183_at   | 0.030257615 | 0.978339036 | 0.331930746 | 0.514413235 |
| 233184_at   | -0.07854493 | -2.44616979 | 0.017461593 | 0.055174882 |
| 233185_at   | -0.19203015 | -4.59507582 | 2.35E-05    | 0.000218517 |
| 233186_s_at | 0.200114718 | 3.967887354 | 0.000200329 | 0.001318769 |
| 233187_s_at | 0.007212945 | 0.287800065 | 0.774515776 | 0.870961702 |
| 233188_at   | -0.04760743 | -1.26768527 | 0.209927353 | 0.374519843 |
| 233189_at   | -0.06526297 | -1.84059412 | 0.070748827 | 0.166952139 |
| 233190_at   | -0.04620295 | -1.54657976 | 0.127351632 | 0.261178375 |
| 233191_at   | 0.012951465 | 0.353985041 | 0.72462135  | 0.839103605 |
| 233192_s_at | 0.026828495 | 0.872993267 | 0.386232074 | 0.568874068 |
| 233193_x_at | 0.119421602 | 4.328943781 | 5.93E-05    | 0.000475057 |
| 233194_at   | -0.02671424 | -0.74072548 | 0.461819444 | 0.639989512 |
| 233195_at   | 0.014853853 | 0.347800565 | 0.729236909 | 0.842037358 |
| 233196_at   | -0.00863629 | -0.26541492 | 0.791621863 | 0.881328359 |
| 233197_at   | 0.008338906 | 0.207172364 | 0.8365939   | 0.909886464 |
| 233198_at   | 0.40020991  | 4.437524615 | 4.08E-05    | 0.000347293 |
| 233200_at   | 0.009056093 | 0.225818426 | 0.82212885  | 0.901149843 |
| 233201_at   | -0.00322824 | -0.10006095 | 0.920637679 | 0.958253247 |
| 233202_at   | -0.12225622 | -3.07829821 | 0.003165728 | 0.013433604 |
| 233203_at   | -0.09973276 | -2.89730708 | 0.005286287 | 0.020633311 |
| 233204_at   | -0.02257108 | -0.52838876 | 0.599226178 | 0.751019836 |
| 233205_at   | -0.02187005 | -0.87596828 | 0.384625961 | 0.567223344 |
| 233206_at   | 0.016680162 | 0.586035921 | 0.560103193 | 0.721577563 |
| 233207_at   | -0.03290993 | -1.01511817 | 0.314224915 | 0.495320962 |
| 233208_x_at | 0.023488131 | 0.815891035 | 0.417868487 | 0.600320757 |
| 233209_at   | -0.00579392 | -0.20770757 | 0.836177884 | 0.909588949 |
| 233210_at   | 0.001980129 | 0.056774544 | 0.954918048 | 0.976767183 |
| 233211_at   | -0.05939349 | -1.8940971  | 0.063153882 | 0.153144457 |
| 233212_at   | -0.01778844 | -0.39718322 | 0.692676166 | 0.817607775 |
| 233213_at   | -0.15836335 | -3.11323491 | 0.002861477 | 0.012339358 |
| 233214_at   | 0.123201228 | 3.988918527 | 0.000186875 | 0.001244128 |
| 233215_s_at | 0.001217806 | 0.030142471 | 0.976055914 | 0.987986585 |
| 233216_at   | -0.10757735 | -2.58628487 | 0.012208407 | 0.041051698 |
| 233217_at   | -0.04539088 | -1.38581368 | 0.171058319 | 0.323938067 |

|             |             |             |             |             |
|-------------|-------------|-------------|-------------|-------------|
| 233218_at   | -0.03120199 | -0.61582942 | 0.540393156 | 0.705968629 |
| 233219_at   | 0.374421918 | 5.165267626 | 3.02E-06    | 3.98E-05    |
| 233220_at   | 0.047891916 | 1.122581415 | 0.266196402 | 0.441408786 |
| 233221_at   | -0.0276362  | -0.7173431  | 0.476013861 | 0.651977061 |
| 233222_at   | -0.00247665 | -0.07037416 | 0.944135612 | 0.971186703 |
| 233223_at   | 0.145431293 | 1.893784902 | 0.063196112 | 0.153206436 |
| 233224_at   | 0.06577318  | 1.575841348 | 0.120449246 | 0.250226269 |
| 233225_at   | 0.093123165 | 2.633962294 | 0.010778718 | 0.037030143 |
| 233226_at   | 0.080050695 | 1.700273852 | 0.094384646 | 0.208349234 |
| 233227_at   | -0.01787533 | -0.52190798 | 0.603702781 | 0.754387941 |
| 233228_at   | 0.128069461 | 3.701336006 | 0.000475939 | 0.002747792 |
| 233229_at   | 0.032287072 | 0.985983704 | 0.328197086 | 0.510734502 |
| 233230_s_at | -0.03962099 | -1.24848518 | 0.216821323 | 0.382965599 |
| 233231_at   | 0.0195312   | 0.574385505 | 0.567906692 | 0.727412756 |
| 233232_at   | -0.05564766 | -1.61189003 | 0.112362433 | 0.2376462   |
| 233233_at   | 0.027561789 | 0.98526029  | 0.3285492   | 0.511086699 |
| 233234_at   | -0.3609043  | -6.59895287 | 1.33E-08    | 5.54E-07    |
| 233235_x_at | -0.02040935 | -0.70835434 | 0.481535161 | 0.656782935 |
| 233236_at   | 0.035459867 | 1.029193024 | 0.307620795 | 0.488000094 |
| 233237_at   | -0.05210084 | -1.8845639  | 0.064454241 | 0.155564558 |
| 233238_s_at | 0.049876061 | 1.454716528 | 0.151086661 | 0.295819024 |
| 233239_at   | -0.04804399 | -1.33458478 | 0.187177804 | 0.345176415 |
| 233240_at   | -0.11951064 | -3.09835309 | 0.002987569 | 0.012797894 |
| 233241_at   | 0.209770107 | 3.222417992 | 0.002077915 | 0.009411793 |
| 233242_at   | 0.031825634 | 0.770877783 | 0.443878264 | 0.624085549 |
| 233243_at   | 0.011621815 | 0.383458156 | 0.702768556 | 0.824512267 |
| 233244_at   | -0.01464567 | -0.38808036 | 0.699363618 | 0.822222308 |
| 233245_at   | -0.04863879 | -1.859367   | 0.068000727 | 0.162173302 |
| 233246_at   | -0.13618425 | -3.04388775 | 0.003494743 | 0.014625626 |
| 233247_x_at | 0.00606265  | 0.205601416 | 0.837815261 | 0.910466823 |
| 233248_at   | 0.068028084 | 2.160058753 | 0.034872753 | 0.095974694 |
| 233249_at   | 0.018373438 | 0.636187019 | 0.527133062 | 0.695129409 |
| 233250_x_at | -0.01242209 | -0.27166293 | 0.786836554 | 0.878367652 |
| 233251_at   | -0.09639727 | -2.42665947 | 0.018335826 | 0.057417651 |
| 233252_s_at | -0.28336821 | -4.15896403 | 0.000105851 | 0.000772992 |
| 233253_at   | -0.00353536 | -0.13218887 | 0.89528801  | 0.943908355 |
| 233254_x_at | 0.097583797 | 2.784011436 | 0.007218389 | 0.026710071 |
| 233255_s_at | -0.11364086 | -2.06415409 | 0.043441966 | 0.114260144 |
| 233256_at   | 0.000686884 | 0.02581068  | 0.979496089 | 0.989727317 |
| 233257_at   | 0.087855399 | 1.770254099 | 0.081889532 | 0.186858315 |
| 233258_at   | 0.040027292 | 1.236090997 | 0.221359466 | 0.388356648 |
| 233259_at   | -0.04369396 | -1.04650508 | 0.299627845 | 0.478898778 |
| 233260_at   | -0.01975544 | -0.54822062 | 0.585624111 | 0.740869951 |
| 233261_at   | 0.039091634 | 1.344725617 | 0.183898736 | 0.341085753 |
| 233262_at   | -0.00348134 | -0.09248846 | 0.926625614 | 0.961566637 |
| 233263_at   | 0.032509334 | 1.19971928  | 0.235079322 | 0.404036652 |
| 233264_at   | 0.063505483 | 1.408696011 | 0.164212162 | 0.314397033 |
| 233265_at   | 0.276386728 | 4.727825917 | 1.47E-05    | 0.000147165 |
| 233266_at   | 0.025338607 | 0.913322882 | 0.3648174   | 0.548176689 |
| 233267_at   | 0.091745432 | 1.904764487 | 0.061725252 | 0.150366563 |
| 233268_s_at | 0.075730906 | 1.214638949 | 0.229378485 | 0.397114106 |
| 233269_at   | 0.023289714 | 0.627488225 | 0.532778195 | 0.699703882 |
| 233270_x_at | 0.265535487 | 5.4667067   | 9.90E-07    | 1.58E-05    |
| 233271_at   | 0.028913159 | 0.519364862 | 0.605463641 | 0.755468788 |
| 233272_at   | -0.00302496 | -0.09561843 | 0.924150054 | 0.960290961 |
| 233273_at   | 0.035915954 | 1.119769982 | 0.26738307  | 0.442686677 |
| 233274_at   | 0.124162587 | 3.803537363 | 0.000342766 | 0.002079679 |
| 233275_at   | -0.03803599 | -1.04565164 | 0.300018519 | 0.479334631 |
| 233276_at   | 0.262111172 | 3.461056083 | 0.001010813 | 0.005140561 |
| 233277_at   | -0.0853404  | -2.01316157 | 0.048701355 | 0.124910243 |
| 233278_at   | -0.0282673  | -0.71244061 | 0.479020771 | 0.654450853 |
| 233279_at   | 0.220119786 | 3.794664671 | 0.000352737 | 0.00212948  |
| 233280_at   | 0.249582155 | 3.236037154 | 0.001995738 | 0.009096741 |
| 233281_at   | -0.00578588 | -0.15949696 | 0.87382614  | 0.932160631 |
| 233282_at   | 0.036920395 | 0.978488486 | 0.331857485 | 0.514341436 |
| 233283_at   | -0.02684684 | -0.7434357  | 0.460190009 | 0.638681196 |
| 233284_at   | -0.05511847 | -1.95003511 | 0.055963957 | 0.139323817 |
| 233285_at   | -0.04628716 | -1.18517018 | 0.240736982 | 0.410821994 |
| 233286_at   | 0.012677856 | 0.355900774 | 0.723193684 | 0.83814794  |
| 233287_at   | -0.03691366 | -1.17858719 | 0.243328968 | 0.414138324 |
| 233288_at   | -0.03962486 | -0.98482581 | 0.3287608   | 0.511237916 |
| 233289_at   | -0.04197504 | -1.01245942 | 0.315483098 | 0.496761112 |
| 233290_at   | -0.01931862 | -0.37188561 | 0.711320201 | 0.830401447 |
| 233291_at   | -0.06608958 | -1.58944616 | 0.117343991 | 0.245555913 |
| 233292_s_at | -0.07159936 | -1.41181154 | 0.163296635 | 0.313006227 |

|             |             |             |             |             |
|-------------|-------------|-------------|-------------|-------------|
| 233293_at   | 0.04764807  | 1.472159888 | 0.146331431 | 0.288996405 |
| 233294_at   | 0.014171012 | 0.491486329 | 0.624919481 | 0.770091307 |
| 233295_at   | -0.03681796 | -1.58242561 | 0.118938266 | 0.247859226 |
| 233296_x_at | 0.363387538 | 5.681982136 | 4.42E-07    | 8.20E-06    |
| 233297_s_at | -0.01817274 | -0.82284338 | 0.413934914 | 0.596164454 |
| 233298_at   | 0.041538563 | 1.413344465 | 0.16284762  | 0.312287563 |
| 233299_at   | -0.05506246 | -1.7541745  | 0.084631693 | 0.191735165 |
| 233300_at   | 0.412104143 | 5.651816892 | 4.95E-07    | 8.96E-06    |
| 233301_at   | 0.077118694 | 2.026472626 | 0.047278073 | 0.122072427 |
| 233302_at   | -0.63517838 | -5.98296499 | 1.41E-07    | 3.30E-06    |
| 233303_at   | 0.145533365 | 3.04665053  | 0.003467192 | 0.014534822 |
| 233304_at   | 0.044978264 | 2.017155163 | 0.048270516 | 0.124032995 |
| 233305_at   | -0.60897561 | -5.41436857 | 1.20E-06    | 1.85E-05    |
| 233306_at   | -0.03670737 | -0.97874545 | 0.331731544 | 0.514282856 |
| 233307_x_at | -0.09929954 | -2.89195111 | 0.005365606 | 0.020884834 |
| 233308_at   | -0.0364035  | -1.35398492 | 0.180942996 | 0.337325507 |
| 233309_at   | 0.025576965 | 0.653172393 | 0.516201238 | 0.68613942  |
| 233310_at   | -0.21311542 | -4.44421286 | 3.98E-05    | 0.000341074 |
| 233311_at   | -0.03136394 | -1.09362759 | 0.278596157 | 0.455447342 |
| 233312_at   | 0.061066432 | 1.007769909 | 0.317710556 | 0.499004338 |
| 233313_at   | 0.216199694 | 5.99708125  | 1.34E-07    | 3.17E-06    |
| 233314_at   | 0.080712199 | 1.403418783 | 0.165771968 | 0.316637354 |
| 233315_at   | 0.224261573 | 5.563985616 | 6.88E-07    | 1.17E-05    |
| 233316_at   | 0.027840171 | 0.646472525 | 0.520498842 | 0.689473139 |
| 233317_at   | 0.205910062 | 3.917140963 | 0.000236745 | 0.001522826 |
| 233318_at   | 0.026846524 | 1.341760697 | 0.184852905 | 0.342244751 |
| 233319_x_at | 0.347506324 | 6.337203354 | 3.64E-08    | 1.16E-06    |
| 233320_at   | -0.02355613 | -0.77411629 | 0.44197586  | 0.622291762 |
| 233321_x_at | 0.123591264 | 4.410981523 | 4.47E-05    | 0.000374701 |
| 233322_at   | -0.03240213 | -1.00627067 | 0.318424901 | 0.499769696 |
| 233323_at   | 0.129595819 | 4.288788357 | 6.81E-05    | 0.000532451 |
| 233324_at   | -0.0691837  | -2.10139993 | 0.039918239 | 0.106697758 |
| 233325_at   | 0.047000454 | 1.3181595   | 0.192582636 | 0.352179024 |
| 233326_at   | 0.064506228 | 0.615782599 | 0.54042385  | 0.705969329 |
| 233327_at   | -0.02302149 | -0.90592493 | 0.368687637 | 0.551932333 |
| 233328_x_at | 0.02794574  | 0.836217575 | 0.406431414 | 0.588772901 |
| 233329_s_at | 0.36406039  | 4.773381569 | 1.25E-05    | 0.000128232 |
| 233330_s_at | -0.05104315 | -1.47932623 | 0.144412188 | 0.286338487 |
| 233331_at   | 0.104932066 | 2.398988821 | 0.019643111 | 0.060696032 |
| 233332_at   | -0.03033106 | -0.97289861 | 0.334604937 | 0.517355608 |
| 233333_x_at | 0.070636397 | 2.75102413  | 0.007892609 | 0.028766634 |
| 233334_x_at | 0.008790273 | 0.27060533  | 0.787645986 | 0.878762655 |
| 233335_at   | -0.01739114 | -0.37676769 | 0.707707917 | 0.827764518 |
| 233336_at   | 0.062698109 | 1.718113799 | 0.091059023 | 0.202750591 |
| 233337_s_at | -0.55129489 | -5.10759923 | 3.73E-06    | 4.74E-05    |
| 233338_at   | -0.03127571 | -0.87630976 | 0.384441874 | 0.567055784 |
| 233339_s_at | -0.01600583 | -0.46755784 | 0.641835938 | 0.782394559 |
| 233340_at   | -0.03870549 | -1.3978069  | 0.167443207 | 0.319011501 |
| 233341_s_at | 0.040032935 | 1.300739307 | 0.198442537 | 0.359613733 |
| 233342_at   | 0.057688259 | 1.163914852 | 0.249178295 | 0.421652962 |
| 233343_at   | -0.02667769 | -0.70501804 | 0.483593526 | 0.658644538 |
| 233344_x_at | -0.08713422 | -2.09351452 | 0.040642779 | 0.108248336 |
| 233345_at   | 0.015139444 | 0.431069047 | 0.668000676 | 0.799932644 |
| 233346_at   | -0.02903305 | -1.06014664 | 0.293430504 | 0.4719981   |
| 233348_at   | -0.02762635 | -0.99141295 | 0.325562475 | 0.507730682 |
| 233349_at   | -0.01434103 | -0.41913512 | 0.676650714 | 0.805971955 |
| 233350_s_at | -0.00067296 | -0.02291943 | 0.981792453 | 0.990793215 |
| 233351_at   | -0.0836138  | -3.3783069  | 0.001301923 | 0.006359772 |
| 233352_at   | 0.016810368 | 0.455012685 | 0.650782387 | 0.788359525 |
| 233353_at   | -0.04111296 | -0.96556873 | 0.338230333 | 0.521014374 |
| 233354_at   | 0.033002961 | 1.290746125 | 0.201863929 | 0.364189516 |
| 233355_at   | 0.017763974 | 0.433038328 | 0.666577586 | 0.799275582 |
| 233356_at   | -0.09121959 | -2.23081692 | 0.029536864 | 0.08406429  |
| 233357_at   | 0.043379271 | 1.180324145 | 0.242643113 | 0.413317301 |
| 233358_at   | 0.008861924 | 0.310133357 | 0.757560474 | 0.860617737 |
| 233359_at   | 0.064863045 | 2.341826193 | 0.022611135 | 0.068004142 |
| 233360_at   | 0.092272105 | 3.015403958 | 0.00379095  | 0.015675903 |
| 233361_at   | 0.036785115 | 1.292041422 | 0.201417982 | 0.363575768 |
| 233362_at   | 0.015999861 | 0.398620528 | 0.691622465 | 0.816767243 |
| 233363_at   | 0.140717173 | 3.605056408 | 0.000645672 | 0.003550243 |
| 233364_s_at | 0.618535019 | 4.495312331 | 3.34E-05    | 0.000293176 |
| 233365_at   | 0.147505646 | 2.94200776  | 0.004665446 | 0.01862844  |
| 233366_at   | -0.01275507 | -0.53221678 | 0.596589242 | 0.74911415  |
| 233367_at   | 0.441631183 | 5.228351749 | 2.39E-06    | 3.28E-05    |
| 233368_s_at | -0.10926628 | -3.37065597 | 0.001332522 | 0.006487264 |

|             |             |             |             |             |
|-------------|-------------|-------------|-------------|-------------|
| 233369_at   | 0.099317646 | 1.767214954 | 0.082402077 | 0.187740295 |
| 233370_at   | 0.061370226 | 1.667519565 | 0.100750265 | 0.218791585 |
| 233371_at   | -0.09286794 | -2.46635255 | 0.016596849 | 0.052868594 |
| 233372_at   | -0.01472967 | -0.52703408 | 0.600160645 | 0.751783911 |
| 233373_at   | -0.02702681 | -0.74070068 | 0.461834372 | 0.639989512 |
| 233374_at   | -0.06871    | -1.57611049 | 0.120387181 | 0.250129317 |
| 233375_at   | 0.166794369 | 1.997202395 | 0.050456291 | 0.128379877 |
| 233376_at   | 0.078011515 | 1.725172768 | 0.089770092 | 0.200580189 |
| 233377_at   | -0.00131556 | -0.04872829 | 0.961301625 | 0.980252173 |
| 233378_at   | 0.032508017 | 0.820290618 | 0.415376627 | 0.597583893 |
| 233379_at   | -0.04245821 | -1.10270586 | 0.274665636 | 0.450935148 |
| 233380_s_at | 0.156031378 | 3.980692921 | 0.00019203  | 0.001272949 |
| 233381_at   | 0.028720077 | 0.822608004 | 0.414067721 | 0.596267497 |
| 233382_at   | -0.02181531 | -0.67350966 | 0.503272468 | 0.675402473 |
| 233383_at   | 0.021496246 | 0.549109391 | 0.585017985 | 0.740459467 |
| 233384_at   | 0.002631263 | 0.08640887  | 0.931436141 | 0.964364176 |
| 233385_x_at | 0.022759042 | 0.583061497 | 0.562090399 | 0.723152832 |
| 233386_at   | -0.08557842 | -1.44498687 | 0.153791059 | 0.299513248 |
| 233387_s_at | -0.00321604 | -0.0887527  | 0.929581248 | 0.963314053 |
| 233388_at   | -0.31032022 | -6.00690472 | 1.29E-07    | 3.08E-06    |
| 233389_at   | -0.01523306 | -0.53034132 | 0.59788048  | 0.750090514 |
| 233390_at   | -0.02224396 | -0.91821542 | 0.362272227 | 0.545526143 |
| 233391_at   | 0.021379843 | 0.717155957 | 0.47612845  | 0.652054075 |
| 233392_at   | -0.5185254  | -6.5676918  | 1.50E-08    | 6.02E-07    |
| 233393_at   | 0.02669921  | 0.974339383 | 0.333895355 | 0.516651705 |
| 233394_at   | 0.00325253  | 0.081803443 | 0.935081947 | 0.966191533 |
| 233395_at   | 0.021207725 | 0.582740087 | 0.562305341 | 0.723285373 |
| 233396_s_at | 0.043112063 | 1.271668681 | 0.208517682 | 0.37261777  |
| 233397_at   | -0.01736893 | -0.47335378 | 0.637720456 | 0.779397359 |
| 233398_at   | -0.01992573 | -0.67031325 | 0.505292801 | 0.677036302 |
| 233399_x_at | 0.122278106 | 3.254950848 | 0.001886678 | 0.008686239 |
| 233400_at   | 0.084825931 | 2.067739303 | 0.043091434 | 0.113477264 |
| 233401_at   | 0.202592009 | 2.609948424 | 0.011478557 | 0.039023253 |
| 233402_at   | -0.01180929 | -0.24358348 | 0.808404637 | 0.892334002 |
| 233403_x_at | 0.015094383 | 0.427239744 | 0.670771405 | 0.801759378 |
| 233404_at   | 0.027451515 | 0.987007461 | 0.327699212 | 0.510101815 |
| 233405_at   | 0.107444571 | 2.220779875 | 0.030247041 | 0.085654635 |
| 233406_at   | -0.11727817 | -2.58584153 | 0.012222475 | 0.041080457 |
| 233407_at   | -0.02369832 | -0.94721113 | 0.347423203 | 0.530385578 |
| 233408_at   | -0.02768967 | -0.82383816 | 0.413373923 | 0.595606015 |
| 233409_at   | 0.009028351 | 0.275601647 | 0.783824135 | 0.876533673 |
| 233410_at   | -0.02081115 | -0.72527632 | 0.471170636 | 0.647574344 |
| 233411_at   | -0.01896082 | -0.63505517 | 0.527865809 | 0.695705654 |
| 233412_x_at | 0.148473483 | 3.571200742 | 0.000718052 | 0.003877153 |
| 233413_at   | -0.00459934 | -0.22451282 | 0.823139742 | 0.901778449 |
| 233414_at   | -0.03948296 | -1.10467949 | 0.273816295 | 0.450036697 |
| 233415_at   | -0.0039258  | -0.13277634 | 0.894825416 | 0.943783829 |
| 233416_at   | 0.127328291 | 2.66713654  | 0.009875854 | 0.034538826 |
| 233417_at   | 0.03043102  | 0.703639161 | 0.484445671 | 0.659302839 |
| 233418_at   | 0.019561361 | 0.688581461 | 0.493805408 | 0.667386938 |
| 233419_at   | -0.1615783  | -3.66138356 | 0.000540427 | 0.003059247 |
| 233420_at   | 0.031416838 | 0.990316729 | 0.32609329  | 0.508239278 |
| 233421_s_at | -0.05079147 | -1.29331781 | 0.200979267 | 0.363106496 |
| 233422_at   | -0.01352342 | -0.38693943 | 0.700203506 | 0.8228634   |
| 233423_at   | -0.04389877 | -1.25547419 | 0.214292757 | 0.379986188 |
| 233424_at   | 0.170134345 | 3.347916524 | 0.001427532 | 0.00687566  |
| 233425_at   | 0.153348799 | 2.346079272 | 0.022377264 | 0.067418409 |
| 233426_at   | -0.01694339 | -0.52309003 | 0.602885129 | 0.753787724 |
| 233427_x_at | 0.227344521 | 5.849188214 | 2.35E-07    | 4.89E-06    |
| 233428_at   | 0.108638931 | 2.425279233 | 0.018399136 | 0.057587658 |
| 233429_at   | 0.016250072 | 0.389990726 | 0.69795815  | 0.821203392 |
| 233430_at   | 0.019880895 | 0.553571833 | 0.581979217 | 0.737948503 |
| 233431_x_at | 0.193282255 | 6.185208669 | 6.52E-08    | 1.80E-06    |
| 233432_at   | 0.024693032 | 0.699919071 | 0.486748834 | 0.661229183 |
| 233433_at   | -0.11645186 | -3.29770726 | 0.001660476 | 0.007800904 |
| 233434_at   | -0.01739934 | -0.45299242 | 0.652227998 | 0.789223026 |
| 233435_at   | -0.05773274 | -1.42092245 | 0.160641952 | 0.309257382 |
| 233436_at   | 0.036015638 | 1.202451984 | 0.234027523 | 0.402910668 |
| 233437_at   | -1.13481361 | -6.38146001 | 3.07E-08    | 1.01E-06    |
| 233438_at   | 0.014631355 | 0.534787644 | 0.594821344 | 0.747813085 |
| 233439_at   | 0.026934531 | 0.712445511 | 0.479017758 | 0.654450853 |
| 233440_at   | 0.11029991  | 2.63926479  | 0.010629527 | 0.036627204 |
| 233441_at   | -0.05088979 | -1.51893706 | 0.134158651 | 0.271340835 |
| 233442_at   | 0.255366043 | 4.915869044 | 7.49E-06    | 8.42E-05    |
| 233443_at   | 0.049934723 | 1.513675287 | 0.135486493 | 0.273416135 |

|             |             |             |             |             |
|-------------|-------------|-------------|-------------|-------------|
| 233444_at   | -0.07719577 | -2.49472091 | 0.015446577 | 0.049846536 |
| 233445_at   | -0.06291533 | -1.64769736 | 0.104770205 | 0.225548652 |
| 233446_at   | -0.97288473 | -7.42773116 | 5.31E-10    | 6.02E-08    |
| 233447_at   | 0.016307987 | 0.349638011 | 0.727864537 | 0.841174869 |
| 233448_s_at | 0.011248252 | 0.358306533 | 0.721402233 | 0.837165263 |
| 233449_at   | 0.169595886 | 2.674283825 | 0.009690617 | 0.03402145  |
| 233450_at   | 0.179712478 | 3.038606116 | 0.003547983 | 0.014802693 |
| 233451_at   | 0.014935564 | 0.496484331 | 0.621411146 | 0.767482091 |
| 233452_at   | 0.037086984 | 1.407442813 | 0.164581542 | 0.314928853 |
| 233453_at   | -0.04975483 | -1.43893853 | 0.155491152 | 0.301950664 |
| 233454_at   | 0.055833316 | 1.437435682 | 0.155915841 | 0.302482476 |
| 233455_at   | -0.06527176 | -2.14719513 | 0.035928717 | 0.098263646 |
| 233456_at   | -0.09087255 | -3.03494244 | 0.003585357 | 0.014932136 |
| 233457_at   | -0.00712811 | -0.22338487 | 0.824013327 | 0.902263907 |
| 233458_at   | 0.160565471 | 5.10356703  | 3.79E-06    | 4.80E-05    |
| 233459_at   | -0.00724755 | -0.16421237 | 0.870129386 | 0.929907996 |
| 233460_at   | -0.02135499 | -0.79046757 | 0.432443982 | 0.613276209 |
| 233461_x_at | 0.253123084 | 3.898743605 | 0.000251458 | 0.001601658 |
| 233462_at   | -0.03430673 | -1.19930925 | 0.235237435 | 0.404215135 |
| 233463_at   | 0.044980204 | 1.867262808 | 0.06687208  | 0.160086078 |
| 233464_at   | -0.03543558 | -0.8884901  | 0.377911858 | 0.560423139 |
| 233465_at   | -0.00289012 | -0.10639214 | 0.915634821 | 0.95512734  |
| 233466_at   | -0.04330019 | -0.96740168 | 0.337321326 | 0.520098141 |
| 233467_s_at | -0.0399048  | -1.21786146 | 0.228160517 | 0.395656661 |
| 233468_at   | -0.01731624 | -0.65565764 | 0.514611895 | 0.685065973 |
| 233469_at   | -0.01151398 | -0.32577017 | 0.745759366 | 0.852880113 |
| 233470_at   | -0.03430611 | -0.88965832 | 0.377289271 | 0.559932659 |
| 233471_at   | -1.52223907 | -7.04867031 | 2.32E-09    | 1.61E-07    |
| 233472_at   | -0.01331156 | -0.55228887 | 0.582852094 | 0.738638512 |
| 233473_x_at | 0.236250297 | 5.222905467 | 2.44E-06    | 3.34E-05    |
| 233474_at   | -0.01145162 | -0.28459341 | 0.776959551 | 0.872152415 |
| 233475_at   | 0.003610679 | 0.108139611 | 0.91425458  | 0.954267438 |
| 233476_at   | -0.01852716 | -0.71016493 | 0.480420146 | 0.655663169 |
| 233477_at   | -0.02976697 | -0.8353255  | 0.406929301 | 0.589292129 |
| 233478_at   | -0.06151912 | -1.89348267 | 0.063237017 | 0.153255721 |
| 233479_at   | -0.0117973  | -0.22232878 | 0.824831461 | 0.902761612 |
| 233480_at   | 0.099069411 | 2.583871179 | 0.012285174 | 0.041253965 |
| 233481_at   | -0.05039914 | -1.67554681 | 0.099158612 | 0.216179137 |
| 233482_at   | -0.4089284  | -5.21764812 | 2.49E-06    | 3.39E-05    |
| 233483_at   | -0.01681904 | -0.44460885 | 0.658241197 | 0.793313857 |
| 233484_at   | -0.07157893 | -1.9283169  | 0.058667928 | 0.144374597 |
| 233485_at   | -0.02099972 | -0.43134654 | 0.667800072 | 0.799863876 |
| 233486_at   | 0.01267213  | -0.31084016 | 0.757025775 | 0.860321313 |
| 233487_s_at | 0.358334122 | 5.70033214  | 4.12E-07    | 7.75E-06    |
| 233488_at   | 0.005130778 | 0.223529946 | 0.823900956 | 0.902207177 |
| 233489_at   | -0.04305008 | -1.46367903 | 0.14862852  | 0.292376682 |
| 233490_at   | -0.01026056 | -0.4528548  | 0.652326526 | 0.789241103 |
| 233491_at   | 0.011756621 | 0.290397043 | 0.77253831  | 0.869852744 |
| 233492_s_at | 0.02023865  | 0.50559636  | 0.615037689 | 0.763174735 |
| 233493_at   | -0.04657794 | -1.57764577 | 0.120033636 | 0.24957168  |
| 233494_at   | -0.00572008 | -0.14969415 | 0.881520243 | 0.93663495  |
| 233495_at   | 0.020527572 | 0.697238684 | 0.488412057 | 0.662843874 |
| 233496_s_at | -0.04856238 | -0.29939884 | 0.7656957   | 0.865420874 |
| 233497_at   | 0.019192531 | 0.559859478 | 0.577710433 | 0.734768623 |
| 233498_at   | 0.199244801 | 4.057004237 | 0.000149035 | 0.001028633 |
| 233499_at   | -1.24574986 | -7.74785127 | 1.53E-10    | 2.77E-08    |
| 233500_x_at | 0.100998817 | 3.069468627 | 0.003247274 | 0.013734    |
| 233501_at   | -0.01902794 | -0.46444381 | 0.644051767 | 0.783791569 |
| 233502_at   | -0.02494045 | -0.71154574 | 0.479570778 | 0.654994773 |
| 233503_at   | 9.75E-05    | 0.003567545 | 0.997165642 | 0.998640408 |
| 233504_at   | -0.03001827 | -0.78904105 | 0.433270668 | 0.61410595  |
| 233505_at   | -0.01438209 | -0.47167889 | 0.63890856  | 0.780486576 |
| 233506_at   | -0.08172256 | -1.39139752 | 0.169367793 | 0.321526863 |
| 233507_at   | -0.04792268 | -1.17817549 | 0.243491737 | 0.414320681 |
| 233508_at   | -0.09948454 | -2.68608088 | 0.009391808 | 0.033186171 |
| 233509_at   | -0.07565595 | -2.42248814 | 0.018527761 | 0.05788949  |
| 233510_s_at | 0.097276921 | 2.378997766 | 0.020638898 | 0.063143046 |
| 233511_at   | -0.01474462 | -0.58998363 | 0.557471142 | 0.719510795 |
| 233512_at   | -0.05290288 | -2.00979093 | 0.049067562 | 0.125626002 |
| 233513_at   | 0.010231303 | 0.26677059  | 0.790582875 | 0.880725019 |
| 233514_x_at | 0.04824272  | 1.145531331 | 0.256648538 | 0.430237677 |
| 233515_at   | 0.089496393 | 3.10375302  | 0.002941227 | 0.012625276 |
| 233516_s_at | 0.212591631 | 1.645656652 | 0.105191377 | 0.226226505 |
| 233517_s_at | 0.022802452 | 0.553244805 | 0.582201654 | 0.7380863   |
| 233518_at   | -0.1625591  | -3.11536166 | 0.002843869 | 0.012284167 |

|             |             |             |             |             |
|-------------|-------------|-------------|-------------|-------------|
| 233519_at   | 0.071899833 | 1.461087937 | 0.149335937 | 0.293264861 |
| 233520_s_at | 0.059458935 | 1.824971124 | 0.073106499 | 0.171231888 |
| 233521_at   | -0.04694594 | -1.15569057 | 0.252500784 | 0.425470913 |
| 233522_at   | 0.007656648 | 0.216289669 | 0.829513559 | 0.905424838 |
| 233523_at   | -0.01606384 | -0.36415552 | 0.71705333  | 0.834349956 |
| 233524_at   | 0.047774138 | 1.214846419 | 0.229299928 | 0.397021891 |
| 233525_s_at | -0.05091087 | -0.7854204  | 0.435373099 | 0.61604111  |
| 233526_at   | -0.07009421 | -2.49334624 | 0.015500614 | 0.049982568 |
| 233527_at   | -0.04175321 | -1.09553518 | 0.277767009 | 0.45441512  |
| 233528_s_at | -0.04872807 | -0.82468974 | 0.412894051 | 0.595183232 |
| 233529_at   | 0.021737092 | 0.520939767 | 0.604372895 | 0.754782133 |
| 233530_at   | -0.0057741  | -0.13760903 | 0.891021432 | 0.941696735 |
| 233531_at   | 0.004307725 | 0.122466764 | 0.902948643 | 0.948403778 |
| 233532_x_at | -0.04466555 | -1.0115866  | 0.315896878 | 0.497188739 |
| 233533_at   | -0.0044066  | -0.1213539  | 0.903826138 | 0.948994801 |
| 233534_at   | -0.07715814 | -2.97948844 | 0.004197806 | 0.017084816 |
| 233535_at   | -0.02059285 | -0.5001463  | 0.618846221 | 0.766028952 |
| 233536_at   | 0.127700562 | 3.012406451 | 0.003823447 | 0.015785451 |
| 233537_at   | 0.01782512  | 0.414899828 | 0.679731195 | 0.808127799 |
| 233538_s_at | 0.033018435 | 0.878617431 | 0.383199298 | 0.565866282 |
| 233539_at   | 0.127589359 | 2.487178676 | 0.015745159 | 0.050613727 |
| 233540_s_at | 0.492917946 | 6.881311282 | 4.44E-09    | 2.55E-07    |
| 233541_at   | -0.05218535 | -1.82494043 | 0.073111195 | 0.171233913 |
| 233542_at   | -0.00758791 | -0.19904178 | 0.842919466 | 0.913675555 |
| 233543_s_at | 0.020254275 | 0.846759683 | 0.400575927 | 0.582897774 |
| 233544_at   | -0.09181289 | -2.14532567 | 0.036084485 | 0.098611215 |
| 233545_at   | 0.053471027 | 1.464035379 | 0.148531436 | 0.292237153 |
| 233546_at   | 0.108560448 | 2.5774487   | 0.012491582 | 0.041811997 |
| 233547_x_at | -0.01198851 | -0.18426127 | 0.854445034 | 0.920409204 |
| 233548_at   | -0.00552974 | -0.25644817 | 0.798503504 | 0.885892313 |
| 233549_at   | 0.021938038 | 0.666759251 | 0.507544286 | 0.67871078  |
| 233550_s_at | 0.063366855 | 1.343655933 | 0.184242549 | 0.34148252  |
| 233551_at   | -0.03736903 | -1.19738787 | 0.235979374 | 0.405114026 |
| 233552_at   | -0.00407862 | -0.14773585 | 0.883058686 | 0.937448209 |
| 233553_at   | -0.06360326 | -2.17943585 | 0.033333418 | 0.092616545 |
| 233554_at   | 0.041069762 | 1.121574506 | 0.266620976 | 0.441932451 |
| 233555_s_at | -0.12405773 | -2.10119225 | 0.039937175 | 0.106725199 |
| 233556_at   | 0.008535847 | 0.321655428 | 0.748858967 | 0.855128135 |
| 233557_s_at | 0.089550284 | 3.079155967 | 0.003157909 | 0.013406789 |
| 233558_s_at | -0.43844969 | -4.2317171  | 8.27E-05    | 0.000628248 |
| 233559_s_at | 0.05132749  | 1.319604915 | 0.192102342 | 0.351574033 |
| 233560_x_at | 0.002919077 | 0.089726142 | 0.928810989 | 0.962873066 |
| 233561_at   | -0.02407278 | -0.87673848 | 0.384210838 | 0.566836314 |
| 233562_at   | -0.25183906 | -6.29258638 | 4.32E-08    | 1.32E-06    |
| 233563_s_at | 0.119686929 | 3.632631684 | 0.000591915 | 0.003302194 |
| 233564_s_at | 0.022322902 | 0.663755479 | 0.509451404 | 0.680440294 |
| 233565_s_at | -0.14014075 | -4.5170076  | 3.09E-05    | 0.000275132 |
| 233566_at   | -0.06408944 | -1.6594923  | 0.102362744 | 0.2215746   |
| 233567_at   | 0.069284943 | 2.046890919 | 0.045164616 | 0.117835978 |
| 233568_x_at | -0.03438896 | -0.79447487 | 0.430126705 | 0.611004913 |
| 233569_at   | -0.0480005  | -1.45910649 | 0.149878687 | 0.294046982 |
| 233570_at   | -0.00338865 | -0.09733934 | 0.92278927  | 0.959594475 |
| 233571_x_at | 0.049826828 | 0.661021315 | 0.511190686 | 0.681934759 |
| 233572_s_at | 0.062028883 | 2.078482867 | 0.04205566  | 0.111288505 |
| 233573_s_at | 0.057023825 | 1.236724212 | 0.221125933 | 0.388084045 |
| 233574_at   | -0.04466582 | -1.38024785 | 0.172756262 | 0.326213574 |
| 233575_s_at | -0.24971612 | -3.37560734 | 0.001312643 | 0.006405836 |
| 233576_at   | -0.02561838 | -1.13450383 | 0.261205452 | 0.435539293 |
| 233577_at   | -0.01390557 | -0.40625078 | 0.686038982 | 0.812498785 |
| 233578_at   | -0.09442452 | -3.09750784 | 0.002994884 | 0.012823086 |
| 233579_at   | -0.12976761 | -3.00680404 | 0.003884882 | 0.016010986 |
| 233580_at   | -0.05189729 | -1.35350556 | 0.181095123 | 0.337496487 |
| 233581_at   | -0.06517727 | -2.29430998 | 0.025375921 | 0.074574185 |
| 233582_at   | 0.00710892  | 0.177555623 | 0.859684656 | 0.923523833 |
| 233583_at   | 0.027497101 | 0.796841354 | 0.428761737 | 0.609873315 |
| 233584_at   | -0.01275979 | -0.33372727 | 0.739777345 | 0.849031332 |
| 233585_at   | 0.00530144  | 0.186233143 | 0.852905501 | 0.919304762 |
| 233586_s_at | -0.00054401 | -0.0156087  | 0.987599615 | 0.994047751 |
| 233587_s_at | 0.120831674 | 1.931202942 | 0.058302315 | 0.143694366 |
| 233588_x_at | -0.02328929 | -0.56258935 | 0.575861795 | 0.733238124 |
| 233589_x_at | -0.04142166 | -1.21784311 | 0.228167438 | 0.395656661 |
| 233590_at   | -0.06738743 | -1.85372633 | 0.068816824 | 0.163567596 |
| 233591_at   | -0.0189967  | -0.88606056 | 0.379208735 | 0.561832287 |
| 233592_at   | -0.02317165 | -0.51608882 | 0.607735452 | 0.757351946 |
| 233593_at   | 0.088393796 | 2.134007304 | 0.037040224 | 0.100626204 |

|             |             |             |             |             |
|-------------|-------------|-------------|-------------|-------------|
| 233594_at   | 0.030561348 | 1.193381275 | 0.237531981 | 0.406941576 |
| 233595_at   | 0.343855296 | 4.553390616 | 2.72E-05    | 0.000247537 |
| 233596_at   | 0.043554979 | 0.948750062 | 0.34664635  | 0.529688138 |
| 233597_at   | 0.003231402 | 0.116881655 | 0.907353733 | 0.950840673 |
| 233598_at   | -0.04087163 | -1.11831504 | 0.267998645 | 0.443360926 |
| 233599_at   | 0.443914977 | 5.04922032  | 4.62E-06    | 5.66E-05    |
| 233600_at   | 0.045007542 | 1.308848838 | 0.195698175 | 0.356272876 |
| 233601_at   | -0.02476098 | -0.82493164 | 0.412757802 | 0.595063603 |
| 233602_at   | -0.04385027 | -1.31159691 | 0.194774697 | 0.354967613 |
| 233603_at   | -0.02076201 | -0.65236723 | 0.51671671  | 0.686418871 |
| 233604_at   | -0.01158244 | -0.41487664 | 0.679748073 | 0.808127799 |
| 233605_x_at | 0.085387361 | 2.890821991 | 0.005382468 | 0.020936699 |
| 233606_at   | -0.03647401 | -1.06924856 | 0.289344918 | 0.467633756 |
| 233607_at   | 0.161398833 | 4.337252679 | 5.77E-05    | 0.000463914 |
| 233608_at   | 0.024637301 | 0.729595314 | 0.468545662 | 0.645437381 |
| 233609_at   | 0.148981023 | 3.839249586 | 0.0003053   | 0.001890865 |
| 233610_at   | -0.02325475 | -0.90116893 | 0.371189526 | 0.554451948 |
| 233611_at   | 0.263464528 | 4.77504472  | 1.24E-05    | 0.00012756  |
| 233612_at   | -0.06936449 | -2.55301552 | 0.013305918 | 0.044039701 |
| 233613_x_at | 0.015438486 | 0.485424758 | 0.629186106 | 0.773365936 |
| 233614_at   | 0.026219174 | 0.78712514  | 0.434382443 | 0.615113024 |
| 233615_at   | 0.023847779 | 1.012338522 | 0.315540392 | 0.496816319 |
| 233616_at   | -0.00097709 | -0.04534047 | 0.963990173 | 0.98147095  |
| 233617_at   | 0.039722324 | 1.09680834  | 0.277214577 | 0.453845127 |
| 233618_at   | -0.02342803 | -0.70835755 | 0.481533183 | 0.656782935 |
| 233619_at   | -0.01252941 | -0.2801999  | 0.780311496 | 0.874421578 |
| 233620_at   | -0.05471919 | -1.75240073 | 0.084938799 | 0.19232368  |
| 233621_s_at | -0.0583953  | -1.23722617 | 0.220940936 | 0.387820287 |
| 233622_x_at | -0.04082367 | -1.67853066 | 0.098572243 | 0.215191026 |
| 233623_at   | -0.02018766 | -0.51155054 | 0.610889011 | 0.759862279 |
| 233624_at   | 0.025917364 | 0.583830154 | 0.561576526 | 0.722874119 |
| 233625_x_at | 0.192498846 | 4.663173951 | 1.85E-05    | 0.000178651 |
| 233626_at   | 0.080455499 | 1.628953477 | 0.108690693 | 0.231866993 |
| 233627_at   | 0.015784991 | 0.648455418 | 0.519224956 | 0.68854079  |
| 233628_at   | -0.04729734 | -1.45531155 | 0.150922486 | 0.295640051 |
| 233629_at   | -0.00214329 | -0.06185351 | 0.9508901   | 0.974862486 |
| 233630_at   | 0.190760213 | 4.214689377 | 8.77E-05    | 0.000658777 |
| 233631_x_at | -9.19E-05   | -0.0024071  | 0.998087595 | 0.999059878 |
| 233632_s_at | 0.127583683 | 1.965707952 | 0.054079422 | 0.13568279  |
| 233633_at   | -0.05813933 | -2.29199567 | 0.02551794  | 0.074930866 |
| 233634_at   | 0.03784235  | 1.186676376 | 0.240146746 | 0.410112279 |
| 233635_at   | 0.063260809 | 1.937124335 | 0.05755825  | 0.14234925  |
| 233636_at   | -0.00803966 | -0.40280236 | 0.688560229 | 0.814491921 |
| 233637_at   | 0.207669078 | 4.857741999 | 9.23E-06    | 1.00E-04    |
| 233638_s_at | -0.19976921 | -3.78864777 | 0.000359657 | 0.002165987 |
| 233639_at   | -0.02532005 | -0.95819745 | 0.3419022   | 0.524897569 |
| 233640_x_at | -0.01226217 | -0.29868625 | 0.766236689 | 0.865747696 |
| 233641_s_at | 0.048712173 | 1.186203239 | 0.240332042 | 0.41028762  |
| 233642_s_at | -0.26250958 | -4.53478873 | 2.91E-05    | 0.000260976 |
| 233643_at   | -0.03031488 | -0.83095811 | 0.409372216 | 0.591537491 |
| 233644_at   | 0.146433237 | 3.990952595 | 0.000185621 | 0.001237439 |
| 233645_s_at | 0.09759993  | 2.507213037 | 0.014963266 | 0.048487406 |
| 233646_at   | -0.07838996 | -2.83987887 | 0.006196271 | 0.02353593  |
| 233647_s_at | 0.067860065 | 0.887071866 | 0.378668565 | 0.561285827 |
| 233648_at   | 0.023863287 | 0.53179976  | 0.596876242 | 0.749405753 |
| 233649_at   | -0.00864938 | -0.26322237 | 0.793303054 | 0.88237728  |
| 233650_at   | -0.00893144 | -0.26073974 | 0.795207846 | 0.883625785 |
| 233651_s_at | -0.15521009 | -3.66579955 | 0.000532908 | 0.003022428 |
| 233652_at   | -0.04603848 | -1.403524   | 0.165740757 | 0.316612541 |
| 233653_at   | 0.001545043 | 0.047901663 | 0.961957592 | 0.980739488 |
| 233654_at   | 0.048353468 | 1.613701114 | 0.111968023 | 0.237013919 |
| 233655_s_at | -0.01338092 | -0.40898815 | 0.684040151 | 0.811055698 |
| 233656_s_at | 0.228690387 | 3.905333102 | 0.00024609  | 0.001573199 |
| 233657_at   | -0.02016263 | -0.81331974 | 0.419329003 | 0.601599712 |
| 233658_at   | 0.064042179 | 1.532660792 | 0.13074393  | 0.266350976 |
| 233659_at   | -0.0118795  | -0.41106914 | 0.682522126 | 0.81018005  |
| 233660_at   | -0.00115631 | -0.03181076 | 0.974731125 | 0.987265038 |
| 233661_at   | -0.03355926 | -0.91286957 | 0.365053799 | 0.548421272 |
| 233662_at   | -0.02952869 | -1.3999452  | 0.166804888 | 0.318095438 |
| 233663_s_at | -0.05108558 | -1.32198105 | 0.191314744 | 0.350448338 |
| 233664_at   | 0.00026829  | 0.007451276 | 0.994080121 | 0.997248681 |
| 233665_x_at | -0.04711215 | -1.06730801 | 0.290212659 | 0.468508314 |
| 233666_at   | -0.05582415 | -1.95107787 | 0.055836853 | 0.139128363 |
| 233667_at   | -0.02728003 | -0.74767488 | 0.457647958 | 0.636378424 |
| 233668_at   | 0.272436886 | 5.066172516 | 4.34E-06    | 5.37E-05    |



|             |             |             |             |             |
|-------------|-------------|-------------|-------------|-------------|
| 233669_s_at | -0.04687005 | -1.47553631 | 0.145424699 | 0.287720601 |
| 233670_at   | -0.03410356 | -0.87894929 | 0.383020815 | 0.565696176 |
| 233671_at   | -0.0539075  | -1.4929262  | 0.140824401 | 0.28116053  |
| 233672_s_at | -0.10959178 | -3.4728489  | 0.000974741 | 0.004988905 |
| 233673_at   | -0.03234935 | -0.96031984 | 0.3408423   | 0.523793969 |
| 233674_at   | 0.112658414 | 2.984641371 | 0.004137036 | 0.016863592 |
| 233675_s_at | -0.04325237 | -1.45115029 | 0.152073563 | 0.297113516 |
| 233676_at   | 0.009367587 | 0.348443358 | 0.728756711 | 0.841729451 |
| 233677_at   | -0.00379219 | -0.09501637 | 0.924626182 | 0.960540046 |
| 233678_at   | 0.116327646 | 3.531807463 | 0.000812003 | 0.004283973 |
| 233679_at   | -0.04649189 | -0.80992934 | 0.421259481 | 0.603214157 |
| 233680_at   | 0.010488629 | 0.312109115 | 0.756066098 | 0.85969788  |
| 233681_at   | -0.01949704 | -0.68879796 | 0.493670134 | 0.667244469 |
| 233682_at   | -0.02855758 | -1.00364737 | 0.319677422 | 0.501246302 |
| 233683_at   | 0.004721352 | 0.237899354 | 0.812789499 | 0.894899535 |
| 233684_at   | -0.09636088 | -2.06022759 | 0.0438287   | 0.115060635 |
| 233685_at   | -0.03049872 | -1.25279189 | 0.215260599 | 0.381112653 |
| 233686_at   | 0.001767313 | 0.046590183 | 0.962998363 | 0.98113172  |
| 233687_s_at | -0.03796056 | -0.81395881 | 0.418965721 | 0.60131719  |
| 233688_at   | -0.07607895 | -1.78642088 | 0.079207435 | 0.182189331 |
| 233689_at   | 0.146153045 | 3.118191345 | 0.002820599 | 0.012196036 |
| 233690_at   | 0.082863871 | 2.054249817 | 0.044423194 | 0.116320681 |
| 233691_at   | -0.02502043 | -0.70481044 | 0.48372177  | 0.658738904 |
| 233692_at   | -0.01991109 | -0.53119469 | 0.597292777 | 0.749654006 |
| 233693_at   | 0.135788927 | 4.217430103 | 8.68E-05    | 0.00065417  |
| 233694_at   | -0.0119832  | -0.24487885 | 0.807406221 | 0.891654634 |
| 233695_s_at | -0.01248351 | -0.37202875 | 0.711214194 | 0.830362271 |
| 233696_at   | -0.04857197 | -1.37685254 | 0.173798383 | 0.327641513 |
| 233697_at   | -0.02624124 | -0.91923491 | 0.361743308 | 0.544998832 |
| 233698_at   | 0.015330748 | 0.340588139 | 0.734632371 | 0.845493148 |
| 233699_at   | -0.02772496 | -0.68174474 | 0.498087608 | 0.671124585 |
| 233700_at   | 0.070437158 | 1.472434962 | 0.146257395 | 0.288920417 |
| 233701_at   | 0.019482916 | 0.806739663 | 0.423080542 | 0.604942616 |
| 233702_x_at | 0.23303365  | 6.393114086 | 2.93E-08    | 9.79E-07    |
| 233703_x_at | -0.03977012 | -1.81817153 | 0.074153036 | 0.173102506 |
| 233704_at   | -0.0519593  | -1.02036269 | 0.311753014 | 0.492677936 |
| 233705_at   | -0.012651   | -0.48913872 | 0.626570397 | 0.771360058 |
| 233706_at   | -0.04632382 | -2.11769945 | 0.038456133 | 0.103634918 |
| 233707_at   | -0.05174976 | -1.49239363 | 0.140963563 | 0.281381924 |
| 233708_at   | 0.012300087 | 0.310113552 | 0.757575458 | 0.860617737 |
| 233709_at   | 0.038997647 | 1.24009027  | 0.219887558 | 0.386806847 |
| 233710_at   | 0.017407002 | 0.565791595 | 0.573696932 | 0.731683788 |
| 233711_at   | 0.025285847 | 0.769234693 | 0.444845298 | 0.625051909 |
| 233712_at   | -0.02961248 | -0.61805501 | 0.538935212 | 0.704943086 |
| 233713_at   | 0.134908556 | 1.912584112 | 0.060695519 | 0.148375678 |
| 233714_at   | -0.04333891 | -1.62045472 | 0.110507117 | 0.234667893 |
| 233715_at   | -0.03813564 | -1.26127508 | 0.212210664 | 0.377303464 |
| 233716_at   | -0.04897783 | -1.02553641 | 0.309327401 | 0.489915471 |
| 233717_x_at | 0.068350051 | 2.051516102 | 0.044697382 | 0.116901649 |
| 233718_at   | -0.0525836  | -1.09606353 | 0.277537659 | 0.454182097 |
| 233719_s_at | 0.007390759 | 0.282784952 | 0.778338767 | 0.872933228 |
| 233720_at   | -0.15098771 | -3.12687887 | 0.002750267 | 0.011935807 |
| 233721_x_at | 0.083403048 | 3.437139389 | 0.001087897 | 0.005459272 |
| 233722_at   | -0.02638298 | -1.02065262 | 0.311616747 | 0.492547326 |
| 233723_at   | -0.03052249 | -0.95626568 | 0.342868788 | 0.525767434 |
| 233724_at   | 0.093446634 | 2.464777645 | 0.016662913 | 0.053034828 |
| 233725_at   | 0.004370589 | 0.101636076 | 0.919392715 | 0.957507922 |
| 233726_at   | -0.05786998 | -2.06295961 | 0.0435593   | 0.114487899 |
| 233727_at   | -0.10534382 | -2.26151908 | 0.027455013 | 0.07928531  |
| 233728_at   | -0.14105999 | -3.54325441 | 0.00078356  | 0.004161482 |
| 233729_at   | 0.071098144 | 1.969656969 | 0.053613242 | 0.134679503 |
| 233730_at   | 0.059842586 | 2.577647972 | 0.012485131 | 0.041793904 |
| 233731_at   | -0.04957969 | -1.1947026  | 0.237019135 | 0.406370475 |
| 233732_at   | 0.017725128 | 0.423196709 | 0.673701773 | 0.803830516 |
| 233733_at   | -0.00987786 | -0.27441793 | 0.784729124 | 0.877194518 |
| 233734_s_at | 0.139216132 | 2.341536794 | 0.022627128 | 0.068038189 |
| 233735_at   | -0.05295315 | -1.36882765 | 0.176280605 | 0.330978108 |
| 233736_at   | -0.03858396 | -1.14203847 | 0.258085732 | 0.431885556 |
| 233737_s_at | -0.00621977 | -0.19497671 | 0.846086003 | 0.915420526 |
| 233738_at   | -0.03345186 | -0.93710672 | 0.35255209  | 0.535725364 |
| 233739_at   | -0.05700883 | -1.6044087  | 0.114003609 | 0.240207877 |
| 233740_at   | -0.02292757 | -0.78535667 | 0.435410157 | 0.61604111  |
| 233741_at   | 0.020608398 | 0.623862469 | 0.535140383 | 0.701569199 |
| 233742_at   | -0.00305685 | -0.1021552  | 0.918982447 | 0.95721359  |
| 233743_x_at | 0.031925963 | 0.777655673 | 0.439902199 | 0.620407998 |

|             |             |             |             |             |
|-------------|-------------|-------------|-------------|-------------|
| 233744_at   | -0.01682285 | -0.7347264  | 0.46543794  | 0.643181319 |
| 233745_at   | 0.022955478 | 0.74939074  | 0.456621334 | 0.635479812 |
| 233746_x_at | 0.163831579 | 3.621131473 | 0.000613794 | 0.003402166 |
| 233747_at   | 0.011989464 | 0.360572122 | 0.719716592 | 0.835838525 |
| 233748_x_at | -0.54129289 | -6.33652702 | 3.65E-08    | 1.16E-06    |
| 233749_at   | 0.013300502 | 0.42701437  | 0.67093462  | 0.801803396 |
| 233750_s_at | -0.0011424  | -0.0275028  | 0.978152213 | 0.988861263 |
| 233751_at   | 0.016100291 | 0.531880161 | 0.596820903 | 0.749371237 |
| 233752_s_at | -0.00746454 | -0.19986532 | 0.842278272 | 0.913379287 |
| 233753_at   | -0.02336999 | -0.80780168 | 0.422473689 | 0.604372271 |
| 233754_x_at | -0.05739502 | -1.38249782 | 0.172068323 | 0.325244353 |
| 233755_at   | -0.0347205  | -1.46304824 | 0.148800494 | 0.29259315  |
| 233756_at   | -0.03002522 | -0.75244912 | 0.454794761 | 0.633811078 |
| 233757_x_at | -0.06479511 | -1.59053451 | 0.117098388 | 0.24515675  |
| 233759_s_at | 0.073505614 | 1.542662707 | 0.128299109 | 0.262560972 |
| 233760_at   | -0.04307254 | -0.79697918 | 0.428682321 | 0.60981659  |
| 233761_at   | -0.1023559  | -2.79749521 | 0.006958387 | 0.025920897 |
| 233762_at   | 0.02361964  | 0.867077644 | 0.389438189 | 0.572337111 |
| 233763_at   | -0.01989956 | -0.70049867 | 0.486389599 | 0.660978443 |
| 233764_s_at | -0.1022183  | -3.0333241  | 0.003601982 | 0.014995788 |
| 233765_at   | -0.05659052 | -1.54179342 | 0.128510136 | 0.262902821 |
| 233766_at   | 0.011567939 | 0.31938623  | 0.750570122 | 0.856447517 |
| 233767_at   | -0.04640087 | -1.24669504 | 0.217472509 | 0.38373663  |
| 233768_at   | 0.03916609  | 1.141359993 | 0.258365565 | 0.432240542 |
| 233769_at   | -0.00191908 | -0.04984921 | 0.960412171 | 0.979837026 |
| 233770_at   | 0.262174758 | 3.989860112 | 0.000186294 | 0.0012409   |
| 233771_at   | 0.108287963 | 2.764133142 | 0.007618032 | 0.027918417 |
| 233772_at   | -0.03492664 | -1.47782347 | 0.144812998 | 0.286873123 |
| 233773_at   | -0.02510251 | -0.67152974 | 0.504523389 | 0.676451543 |
| 233774_at   | -0.10670968 | -2.58792947 | 0.012156351 | 0.040915594 |
| 233775_x_at | 0.203469745 | 4.989634309 | 5.73E-06    | 6.73E-05    |
| 233776_at   | 0.00248019  | 0.058561586 | 0.953500667 | 0.976083463 |
| 233777_at   | 0.023865473 | 0.799657633 | 0.427140701 | 0.608438955 |
| 233778_at   | -0.0374075  | -1.08092892 | 0.284159765 | 0.461608617 |
| 233779_x_at | 0.011473029 | 0.429595772 | 0.669066132 | 0.800690804 |
| 233780_at   | 0.058658293 | 1.657269418 | 0.102812971 | 0.222288098 |
| 233781_s_at | -0.03492245 | -1.14777496 | 0.255728373 | 0.429113631 |
| 233782_at   | 0.048978346 | 1.316151378 | 0.193251413 | 0.353127489 |
| 233783_at   | 0.035480335 | 1.163524417 | 0.249335313 | 0.421790901 |
| 233784_at   | -0.03214613 | -0.7103298  | 0.480318689 | 0.655642859 |
| 233785_at   | 0.008210626 | 0.237251142 | 0.81328993  | 0.895171745 |
| 233786_at   | 0.512819463 | 4.780228496 | 1.22E-05    | 0.00012571  |
| 233787_at   | -0.05706943 | -1.70797707 | 0.092936599 | 0.205935965 |
| 233788_at   | 0.018785728 | 0.539437472 | 0.591630063 | 0.745366488 |
| 233789_at   | -0.12885628 | -3.3099459  | 0.001600596 | 0.007564117 |
| 233790_at   | -0.11973214 | -2.30775135 | 0.024564873 | 0.072691076 |
| 233791_at   | -0.04505687 | -1.51716747 | 0.134604061 | 0.272106237 |
| 233792_at   | -0.08298067 | -1.36099998 | 0.178727853 | 0.334311522 |
| 233793_at   | -0.00535831 | -0.17048975 | 0.865212609 | 0.9271114   |
| 233794_at   | 0.005247926 | 0.175998129 | 0.860902559 | 0.924221291 |
| 233795_at   | 0.02717587  | 0.797594607 | 0.428327809 | 0.60960519  |
| 233796_at   | -0.0676059  | -1.57402293 | 0.120869249 | 0.250912186 |
| 233797_s_at | 0.04604658  | 1.157175506 | 0.251898561 | 0.424756092 |
| 233798_at   | -0.0149761  | -0.54912371 | 0.585008221 | 0.740459467 |
| 233799_at   | 0.03777201  | 0.626960336 | 0.533121779 | 0.699990556 |
| 233800_at   | 0.045382862 | 1.217592518 | 0.228261985 | 0.395701053 |
| 233801_s_at | -0.08698497 | -1.81820874 | 0.074147274 | 0.173098097 |
| 233802_at   | 0.012800037 | 0.432481864 | 0.666979587 | 0.799498825 |
| 233803_s_at | -0.11506295 | -2.8732771  | 0.005650857 | 0.021790172 |
| 233804_at   | -0.01309327 | -0.57934095 | 0.564580994 | 0.72504393  |
| 233805_at   | -0.06001315 | -2.30666023 | 0.024629841 | 0.072835099 |
| 233806_at   | -0.02817601 | -0.76657213 | 0.446414958 | 0.626292607 |
| 233807_at   | 0.0834929   | 2.706293316 | 0.008899375 | 0.031732157 |
| 233808_at   | 0.002506722 | 0.089504509 | 0.928986356 | 0.962965516 |
| 233809_at   | -0.03683179 | -1.02676129 | 0.308755015 | 0.489263436 |
| 233810_x_at | -0.13970034 | -4.0308412  | 0.000162608 | 0.001106465 |
| 233811_at   | 0.155092143 | 3.825255504 | 0.000319488 | 0.001962147 |
| 233812_at   | -0.03291703 | -1.01766637 | 0.313022224 | 0.494035005 |
| 233813_at   | -0.12785606 | -1.80698533 | 0.075902037 | 0.17623721  |
| 233814_at   | -0.33005655 | -4.46415352 | 3.72E-05    | 0.000321928 |
| 233815_at   | -0.08319817 | -2.40503414 | 0.019350576 | 0.060023318 |
| 233816_at   | 0.063755349 | 1.479348273 | 0.144406315 | 0.286338487 |
| 233817_at   | 0.061733946 | 1.498322679 | 0.139420392 | 0.279128081 |
| 233818_at   | 0.008839939 | 0.285008548 | 0.776643047 | 0.871981956 |
| 233819_s_at | 0.319969992 | 3.831699293 | 0.000312878 | 0.00192871  |

|             |             |             |             |             |
|-------------|-------------|-------------|-------------|-------------|
| 233820_at   | 0.032599138 | 0.885740946 | 0.379379554 | 0.562027016 |
| 233821_at   | -0.04476201 | -1.75632865 | 0.084259967 | 0.191125535 |
| 233822_x_at | -0.02496472 | -1.60104979 | 0.114746722 | 0.241432159 |
| 233823_at   | -0.05617126 | -1.45566298 | 0.150825586 | 0.295476136 |
| 233824_at   | 0.255071977 | 5.303170459 | 1.82E-06    | 2.62E-05    |
| 233825_s_at | -0.18875361 | -2.96542707 | 0.004367888 | 0.017642082 |
| 233826_at   | -0.00708012 | -0.22152311 | 0.825455728 | 0.903135218 |
| 233827_s_at | -0.16998776 | -2.54805713 | 0.013476939 | 0.044500286 |
| 233828_at   | 0.019875458 | 0.632039987 | 0.529820393 | 0.69718143  |
| 233829_at   | -0.07794421 | -2.12576071 | 0.037750431 | 0.10217645  |
| 233830_at   | -0.09940333 | -2.48167773 | 0.015966204 | 0.051216193 |
| 233831_at   | 0.051738108 | 2.071304845 | 0.042745259 | 0.112692962 |
| 233832_at   | 0.033111949 | 0.897804482 | 0.372965901 | 0.556046037 |
| 233833_at   | -0.05078118 | -1.47771461 | 0.144842068 | 0.286905189 |
| 233834_at   | 0.050868168 | 1.45168538  | 0.151925166 | 0.296940414 |
| 233835_at   | 0.020882052 | 0.587777937 | 0.55894098  | 0.720617057 |
| 233836_at   | 0.083896143 | 2.885796034 | 0.005458119 | 0.021178526 |
| 233837_at   | 0.032186117 | 1.095779247 | 0.277661046 | 0.454350742 |
| 233838_at   | -0.01781228 | -0.52111132 | 0.604254137 | 0.754718179 |
| 233839_at   | 0.025548033 | 0.555726512 | 0.580514668 | 0.736951046 |
| 233840_at   | 0.106203088 | 2.951423007 | 0.004543625 | 0.018241439 |
| 233841_s_at | -0.08690405 | -1.51636964 | 0.134805261 | 0.272365132 |
| 233842_x_at | 0.153013142 | 2.514488548 | 0.01468812  | 0.047734662 |
| 233843_at   | 0.029142365 | 0.755259161 | 0.453120229 | 0.632404262 |
| 233844_at   | 0.02010597  | 0.439706989 | 0.661767675 | 0.795773338 |
| 233845_at   | -0.02587427 | -1.13741279 | 0.259997841 | 0.43404518  |
| 233846_at   | -0.02562384 | -0.86487275 | 0.390637419 | 0.573447571 |
| 233847_x_at | -0.02265745 | -1.43571644 | 0.156402787 | 0.303107123 |
| 233848_x_at | 0.015595308 | 0.537546357 | 0.592927005 | 0.746201107 |
| 233849_s_at | 0.436167719 | 5.260993409 | 2.12E-06    | 2.97E-05    |
| 233850_s_at | 0.143861957 | 2.890514308 | 0.005387071 | 0.020946491 |
| 233851_s_at | 0.083516944 | 2.203071655 | 0.03153675  | 0.088632902 |
| 233852_at   | -0.04330459 | -1.19444485 | 0.237119113 | 0.406495106 |
| 233853_at   | -0.02786997 | -0.92624636 | 0.358119203 | 0.541132076 |
| 233854_x_at | -0.04294481 | -1.47413096 | 0.145801567 | 0.288262049 |
| 233855_at   | 0.012466044 | 0.383530005 | 0.702715581 | 0.824512267 |
| 233856_at   | -0.02031983 | -0.70811014 | 0.481685656 | 0.656926925 |
| 233857_s_at | -0.05696514 | -1.33897319 | 0.185753404 | 0.343460124 |
| 233858_at   | 0.000956695 | 0.037691074 | 0.970062175 | 0.984891851 |
| 233859_at   | -0.00140192 | -0.04438569 | 0.964747963 | 0.981974036 |
| 233860_s_at | 0.069491223 | 2.081712644 | 0.041748536 | 0.110591972 |
| 233861_at   | 0.009198403 | 0.290244214 | 0.77265464  | 0.869852744 |
| 233862_at   | -0.02542354 | -0.64606728 | 0.520759391 | 0.689687582 |
| 233863_at   | -0.03505463 | -0.94940748 | 0.346314831 | 0.529374487 |
| 233864_s_at | -0.15797784 | -2.63457714 | 0.010761321 | 0.036990076 |
| 233865_at   | 0.254684239 | 4.869662124 | 8.84E-06    | 9.63E-05    |
| 233866_at   | 0.039767455 | 1.28078162  | 0.205319235 | 0.368550551 |
| 233867_at   | 0.212137583 | 3.980131348 | 0.000192387 | 0.001274559 |
| 233868_x_at | 0.24312628  | 5.03547792  | 4.85E-06    | 5.88E-05    |
| 233869_x_at | 0.206350703 | 3.602465875 | 0.000650955 | 0.003574014 |
| 233870_at   | 0.045715992 | 1.099166289 | 0.276193481 | 0.452622714 |
| 233871_at   | -0.02832995 | -0.81866635 | 0.416295538 | 0.598594144 |
| 233872_x_at | 0.050172381 | 1.720236232 | 0.090669883 | 0.202031251 |
| 233873_x_at | 0.096426754 | 2.185443339 | 0.032868444 | 0.091626527 |
| 233874_at   | 0.13557651  | 3.326392769 | 0.001523333 | 0.007252666 |
| 233875_at   | 0.029597037 | 1.222457125 | 0.226431743 | 0.393975596 |
| 233876_at   | 0.009450945 | 0.307969824 | 0.759197941 | 0.861347428 |
| 233877_at   | 0.255275813 | 5.12028779  | 3.56E-06    | 4.56E-05    |
| 233878_s_at | -0.04180004 | -0.8092178  | 0.421665305 | 0.603640918 |
| 233879_at   | 0.011194942 | 0.406446048 | 0.685896322 | 0.812451968 |
| 233880_at   | 0.058347348 | 1.903121118 | 0.061943536 | 0.150812742 |
| 233881_s_at | -0.1811611  | -3.14923909 | 0.002576727 | 0.011286788 |
| 233882_s_at | -0.23795266 | -3.12808502 | 0.002740633 | 0.011904401 |
| 233883_at   | -0.05601465 | -1.53260232 | 0.130758331 | 0.266368171 |
| 233884_at   | 0.028549657 | 0.671134059 | 0.50477358  | 0.676726087 |
| 233885_at   | 0.001352477 | 0.037483316 | 0.970227117 | 0.984948899 |
| 233886_at   | -0.00333931 | -0.11815953 | 0.906345584 | 0.950319277 |
| 233887_at   | 0.021400637 | 0.674903294 | 0.502392976 | 0.674582123 |
| 233888_s_at | 0.059655443 | 1.464955386 | 0.148281017 | 0.291847237 |
| 233889_at   | -0.05634283 | -1.56543083 | 0.1228697   | 0.254061842 |
| 233890_at   | 0.148132887 | 3.993555484 | 0.000184028 | 0.001229387 |
| 233891_at   | 0.109734462 | 2.337098167 | 0.022873678 | 0.068656585 |
| 233892_at   | 0.037272276 | 1.115570341 | 0.269162621 | 0.4447926   |
| 233893_s_at | 0.197701683 | 3.50061629  | 0.000894573 | 0.004648869 |
| 233894_x_at | -0.01713052 | -0.41416424 | 0.680266776 | 0.80845986  |

|             |             |             |             |             |
|-------------|-------------|-------------|-------------|-------------|
| 233895_at   | -0.02596347 | -0.89179767 | 0.376150808 | 0.558911228 |
| 233896_s_at | 0.067777552 | 1.677291285 | 0.098815452 | 0.21558507  |
| 233897_at   | 0.036255364 | 1.214858019 | 0.229295536 | 0.397021891 |
| 233898_s_at | -0.01845847 | -0.27182303 | 0.786714039 | 0.878329835 |
| 233899_x_at | 0.023974408 | 0.36973267  | 0.712915293 | 0.831353171 |
| 233900_at   | 0.027963464 | 0.811732655 | 0.420232018 | 0.602275271 |
| 233901_at   | -0.07334993 | -2.26589921 | 0.027168838 | 0.078634948 |
| 233902_at   | -0.04348187 | -1.24051367 | 0.21973215  | 0.386618563 |
| 233903_s_at | 0.102711264 | 2.496699727 | 0.015369091 | 0.049633312 |
| 233904_at   | 0.002296512 | 0.078821729 | 0.93744312  | 0.967424424 |
| 233905_at   | 0.010493532 | 0.34859112  | 0.728646341 | 0.841681631 |
| 233906_at   | -0.02452911 | -0.90397871 | 0.369710144 | 0.55294444  |
| 233907_s_at | -0.04732313 | -1.68187286 | 0.097918827 | 0.214078281 |
| 233908_x_at | 0.025840315 | 0.64000572  | 0.524664817 | 0.693183552 |
| 233909_at   | 0.054443864 | 1.942256995 | 0.056919861 | 0.141192342 |
| 233910_at   | -0.14030211 | -4.14679902 | 0.000110285 | 0.000799876 |
| 233911_s_at | -0.01033522 | -0.31352673 | 0.754994457 | 0.859178359 |
| 233912_x_at | 0.020364774 | 0.306743746 | 0.760126388 | 0.861854209 |
| 233913_at   | -7.92E-05   | -0.00205297 | 0.998368947 | 0.999150356 |
| 233914_s_at | -0.05700838 | -1.106994   | 0.272822614 | 0.448865715 |
| 233915_at   | 0.054563861 | 1.939656966 | 0.057242487 | 0.141811599 |
| 233916_at   | -0.0947747  | -2.38334418 | 0.020418633 | 0.062611785 |
| 233917_s_at | 0.066136728 | 1.95189764  | 0.055737104 | 0.138936374 |
| 233918_at   | 0.021107173 | 0.612897434 | 0.542316937 | 0.707181413 |
| 233919_s_at | -0.44147286 | -6.11149605 | 8.64E-08    | 2.25E-06    |
| 233920_at   | -0.07898521 | -1.86278374 | 0.067510372 | 0.161294426 |
| 233921_s_at | 0.173020649 | 3.647208219 | 0.000565253 | 0.003177645 |
| 233922_at   | 0.108005309 | 3.185113486 | 0.002319603 | 0.010325388 |
| 233923_at   | 0.011903305 | 0.242186762 | 0.809481531 | 0.892992639 |
| 233924_s_at | -0.25768301 | -4.67065308 | 1.80E-05    | 0.000174531 |
| 233925_at   | -0.03613981 | -1.06922542 | 0.289355251 | 0.467633756 |
| 233926_at   | -0.02457067 | -0.9012074  | 0.371169247 | 0.554440188 |
| 233927_at   | -0.00113631 | -0.03403847 | 0.97296222  | 0.986358797 |
| 233928_at   | -0.03803622 | -1.02150955 | 0.311214222 | 0.492102534 |
| 233929_x_at | 0.156405075 | 3.402051921 | 0.001211138 | 0.005981016 |
| 233930_at   | -0.07532267 | -1.86715752 | 0.066887025 | 0.16011328  |
| 233931_at   | 0.348558222 | 5.692105752 | 4.25E-07    | 7.96E-06    |
| 233932_at   | 0.015868167 | 0.352318146 | 0.725864375 | 0.839900856 |
| 233933_s_at | -0.17502886 | -3.95170171 | 0.000211314 | 0.0013795   |
| 233934_at   | -0.0849943  | -2.13919168 | 0.036599737 | 0.099714427 |
| 233935_at   | -0.02656734 | -0.61736303 | 0.539388299 | 0.705178135 |
| 233936_s_at | 0.105381413 | 1.80643296  | 0.075989288 | 0.176357339 |
| 233937_at   | 0.107131567 | 3.131093886 | 0.002716738 | 0.011818989 |
| 233938_at   | -0.02838125 | -0.74904274 | 0.456829441 | 0.635714952 |
| 233939_at   | 0.04950398  | 1.003962557 | 0.319526756 | 0.501080381 |
| 233940_at   | -0.0773253  | -1.96378153 | 0.054308092 | 0.136103698 |
| 233941_at   | -0.02709776 | -0.86052546 | 0.393008627 | 0.57578566  |
| 233942_at   | -0.00468225 | -0.11862793 | 0.905976087 | 0.950184941 |
| 233943_x_at | -0.05833613 | -1.74311289 | 0.086562004 | 0.195109394 |
| 233944_at   | -0.13283298 | -2.40734141 | 0.01923996  | 0.059754852 |
| 233945_at   | 0.047461462 | 2.028564195 | 0.047057726 | 0.121637008 |
| 233946_at   | 0.096521019 | 2.494293674 | 0.015463353 | 0.049880055 |
| 233947_s_at | -0.00577475 | -0.14300882 | 0.886774107 | 0.939251295 |
| 233948_at   | 0.020533292 | 0.647388614 | 0.519910106 | 0.689097054 |
| 233949_s_at | 0.103879746 | 2.58642798  | 0.012203869 | 0.041045705 |
| 233950_at   | -0.27487855 | -4.00623476 | 0.000176456 | 0.001184997 |
| 233951_at   | -0.01487728 | -0.45121236 | 0.653502843 | 0.790041617 |
| 233952_s_at | 0.074510397 | 1.170168437 | 0.246673002 | 0.418332251 |
| 233953_at   | -0.04534102 | -1.42247141 | 0.16019397  | 0.308581048 |
| 233954_at   | 0.001987709 | 0.069476588 | 0.944846948 | 0.971541961 |
| 233955_x_at | 0.581359565 | 6.096486124 | 9.15E-08    | 2.35E-06    |
| 233956_at   | 0.012004483 | 0.249907491 | 0.803533407 | 0.889413419 |
| 233957_at   | 0.014602382 | 0.480865614 | 0.6324036   | 0.775733275 |
| 233958_at   | 0.012019247 | 0.261212121 | 0.794845317 | 0.883376692 |
| 233959_at   | 0.204356252 | 3.669542812 | 0.000526613 | 0.002993564 |
| 233960_s_at | 0.064067243 | 2.008300656 | 0.049230229 | 0.12592705  |
| 233961_at   | -0.01965534 | -0.6534916  | 0.515996954 | 0.686084458 |
| 233962_at   | 0.045430245 | 1.278041169 | 0.206277205 | 0.369733732 |
| 233963_at   | -0.08038608 | -1.92870418 | 0.058618753 | 0.14427121  |
| 233964_at   | -0.01851974 | -0.57288647 | 0.568914613 | 0.7279881   |
| 233965_at   | -0.04466237 | -0.87285067 | 0.386309163 | 0.568935909 |
| 233966_at   | 0.043819789 | 1.626806489 | 0.109147262 | 0.232563025 |
| 233967_at   | 0.047247522 | 1.597501244 | 0.115536031 | 0.242693689 |
| 233968_at   | -0.02905418 | -0.80119683 | 0.426256294 | 0.607566459 |
| 233969_at   | 0.038300886 | 1.107584128 | 0.27256966  | 0.448581648 |

|             |             |             |             |             |
|-------------|-------------|-------------|-------------|-------------|
| 233970_s_at | -0.22240977 | -4.1647956  | 0.000103788 | 0.000760811 |
| 233971_at   | 0.034475781 | 0.85384151  | 0.39667176  | 0.579135826 |
| 233972_s_at | -0.0270492  | -0.47050626 | 0.639740951 | 0.780991084 |
| 233973_at   | -0.01937133 | -0.64172758 | 0.523553869 | 0.692217161 |
| 233974_s_at | 0.057432515 | 1.218050532 | 0.228089204 | 0.395580961 |
| 233975_at   | 0.042553701 | 1.159542601 | 0.250940698 | 0.423720783 |
| 233976_at   | -0.14918931 | -3.97958194 | 0.000192737 | 0.001276497 |
| 233977_at   | -0.00792285 | -0.24346752 | 0.808494033 | 0.892342098 |
| 233978_at   | -0.05040151 | -1.47743502 | 0.144916748 | 0.287033296 |
| 233979_s_at | -0.00238221 | -0.05728519 | 0.954513016 | 0.976618516 |
| 233980_s_at | -0.06107461 | -2.46844414 | 0.016509476 | 0.052627781 |
| 233981_at   | -0.02786931 | -0.81146432 | 0.420384809 | 0.602425302 |
| 233982_x_at | 0.052546297 | 1.457733069 | 0.150255792 | 0.29460524  |
| 233983_at   | 0.025373227 | 0.77714051  | 0.440203667 | 0.620754813 |
| 233984_at   | -0.13063267 | -2.82836314 | 0.006395333 | 0.024144299 |
| 233985_x_at | -0.19293333 | -3.22881833 | 0.002038907 | 0.009253899 |
| 233986_s_at | 0.082453779 | 2.130493796 | 0.037341372 | 0.101248339 |
| 233987_at   | -0.03867457 | -1.05173287 | 0.297242362 | 0.476210053 |
| 233988_x_at | 0.033351307 | 0.723801257 | 0.472069047 | 0.648342394 |
| 233989_at   | 0.015110063 | 0.556955046 | 0.57968042  | 0.736352139 |
| 233990_at   | -0.01720206 | -0.49967031 | 0.619179347 | 0.766186653 |
| 233991_at   | -0.04031283 | -1.31837182 | 0.192512028 | 0.352093124 |
| 233992_x_at | -0.0447025  | -1.69164385 | 0.096028888 | 0.211051047 |
| 233993_at   | -0.0868049  | -1.79959059 | 0.077077081 | 0.178363221 |
| 233994_at   | -0.0230785  | -0.67480621 | 0.502454216 | 0.674628488 |
| 233995_at   | -0.01862412 | -0.42653955 | 0.671278535 | 0.801990425 |
| 233996_x_at | -0.03744738 | -1.766719   | 0.082485972 | 0.187883545 |
| 233997_at   | -0.07185417 | -1.63314767 | 0.107803246 | 0.230479462 |
| 233998_x_at | 0.051595746 | 1.296750264 | 0.199803024 | 0.361551412 |
| 233999_s_at | -0.02165264 | -0.38435872 | 0.702104675 | 0.824058934 |
| 234000_s_at | 0.090802021 | 1.384074568 | 0.17158748  | 0.324568826 |
| 234001_s_at | 0.101603289 | 2.725436027 | 0.008454925 | 0.030458449 |
| 234002_at   | 0.057146393 | 1.263664868 | 0.211357278 | 0.376273879 |
| 234003_at   | 0.010727742 | 0.20680829  | 0.83687692  | 0.910019262 |
| 234004_at   | -0.02858438 | -1.01955706 | 0.312131873 | 0.493104202 |
| 234005_x_at | 0.070781061 | 1.79246903  | 0.078223053 | 0.180379994 |
| 234006_s_at | 0.031083918 | 0.889508392 | 0.377369134 | 0.560012102 |
| 234007_at   | 0.017249543 | 0.40894354  | 0.684072708 | 0.811072782 |
| 234008_s_at | -0.03945413 | -1.0752049  | 0.28669266  | 0.464705802 |
| 234009_at   | -0.00933501 | -0.26608431 | 0.791108796 | 0.881020515 |
| 234010_at   | 0.04122638  | 0.903104979 | 0.370169769 | 0.553409624 |
| 234011_at   | -0.03016074 | -1.09534032 | 0.277851625 | 0.454479553 |
| 234012_at   | 0.058134673 | 1.471327557 | 0.146555633 | 0.289279407 |
| 234013_at   | 0.027887127 | 0.707338179 | 0.482161575 | 0.657313997 |
| 234014_at   | -0.02597766 | -0.70586839 | 0.483068434 | 0.65815     |
| 234015_at   | -0.00694414 | -0.18859121 | 0.851065202 | 0.918250567 |
| 234016_at   | -0.14112747 | -3.90275123 | 0.00024818  | 0.001584294 |
| 234017_at   | 0.022558589 | 0.727016481 | 0.470112012 | 0.646767618 |
| 234018_s_at | -0.05386022 | -1.31584618 | 0.193353206 | 0.353270164 |
| 234019_at   | -0.10329782 | -1.93232366 | 0.058160863 | 0.143448435 |
| 234020_x_at | 0.081564037 | 2.45460554  | 0.017095345 | 0.054228487 |
| 234021_at   | 0.032755605 | 0.629466075 | 0.531491907 | 0.698568842 |
| 234022_at   | 0.014216008 | 0.571745302 | 0.569682502 | 0.728476406 |
| 234023_s_at | -0.02087363 | -0.91801067 | 0.362378511 | 0.545594274 |
| 234024_at   | -0.14239674 | -2.57712621 | 0.012502029 | 0.041840698 |
| 234025_at   | -0.01691517 | -0.51351953 | 0.609519888 | 0.75866604  |
| 234026_at   | -0.03177708 | -0.8002392  | 0.426806409 | 0.608059578 |
| 234027_at   | 0.00033478  | 0.008148667 | 0.99352607  | 0.997070502 |
| 234028_at   | 0.056729702 | 2.112656115 | 0.038903463 | 0.104550425 |
| 234029_at   | 0.020375905 | 0.578773781 | 0.564961147 | 0.725366184 |
| 234030_at   | -0.12863838 | -2.572564   | 0.012650671 | 0.042259048 |
| 234031_at   | -0.05106473 | -1.52162964 | 0.133483163 | 0.270402933 |
| 234032_at   | 0.076326379 | 1.427856821 | 0.158643969 | 0.306435238 |
| 234033_at   | 0.08980707  | 1.980541647 | 0.052346091 | 0.132232167 |
| 234034_at   | 0.538945665 | 5.162967966 | 3.05E-06    | 4.00E-05    |
| 234035_at   | -0.0188813  | -0.54769197 | 0.585984778 | 0.741053529 |
| 234036_x_at | 0.025176214 | 0.580638091 | 0.56371205  | 0.724302646 |
| 234037_s_at | -0.01033641 | -0.24945954 | 0.803878198 | 0.889588581 |
| 234038_at   | -0.02297468 | -0.74592236 | 0.458697887 | 0.637322825 |
| 234039_at   | 0.160321083 | 3.560754747 | 0.000741903 | 0.003984753 |
| 234040_at   | -0.02208271 | -1.15169813 | 0.254125043 | 0.427288336 |
| 234041_at   | -0.13836136 | -4.07727211 | 0.00013928  | 0.000973368 |
| 234042_at   | -0.05523415 | -1.39976231 | 0.166859413 | 0.31816107  |
| 234043_at   | 0.046730493 | 1.793341833 | 0.078081844 | 0.180110131 |
| 234044_at   | 0.032200009 | 0.961974525 | 0.340017462 | 0.522866201 |

|             |             |             |             |             |
|-------------|-------------|-------------|-------------|-------------|
| 234045_x_at | -0.0321672  | -0.66899404 | 0.506127899 | 0.677619425 |
| 234046_at   | -0.05580619 | -1.91380962 | 0.060535469 | 0.148107374 |
| 234047_at   | 0.007030446 | 0.217850111 | 0.828303151 | 0.904656022 |
| 234048_s_at | 0.018072118 | 0.689816649 | 0.493033905 | 0.666747497 |
| 234049_at   | -0.010132   | -0.29248446 | 0.770949949 | 0.868878385 |
| 234050_at   | -0.05505705 | -1.72469606 | 0.089856659 | 0.200661859 |
| 234051_at   | -0.14215152 | -2.67793815 | 0.00959714  | 0.033743637 |
| 234052_at   | 0.03471491  | 1.207636039 | 0.232041623 | 0.40041439  |
| 234053_at   | -0.02343708 | -0.70293795 | 0.48487934  | 0.659712234 |
| 234054_at   | -0.02422072 | -0.66924314 | 0.505970157 | 0.677557926 |
| 234055_s_at | 0.013780401 | 0.410412884 | 0.683000707 | 0.810511296 |
| 234056_at   | 0.058028572 | 1.909689986 | 0.06107492  | 0.149115559 |
| 234057_at   | -0.05124199 | -1.71165389 | 0.092251908 | 0.204784298 |
| 234058_at   | -0.02692887 | -0.92107998 | 0.360787346 | 0.543870962 |
| 234059_at   | 0.172892603 | 2.90697528  | 0.005145851 | 0.020178853 |
| 234060_at   | 0.016814587 | 0.755394166 | 0.453039868 | 0.632331598 |
| 234061_at   | -0.00454063 | -0.1323517  | 0.89515979  | 0.943885127 |
| 234062_at   | 0.023593804 | 0.892249625 | 0.375910574 | 0.558721454 |
| 234063_at   | 0.014948301 | 0.515418723 | 0.608200621 | 0.757670439 |
| 234064_at   | 0.021544004 | 0.550084081 | 0.584353609 | 0.739911931 |
| 234065_at   | 0.068120076 | 2.1561038   | 0.035194481 | 0.096669641 |
| 234066_at   | 0.075129987 | 0.860648746 | 0.392941259 | 0.575710536 |
| 234067_at   | -0.06175608 | -1.54275544 | 0.128276613 | 0.262545264 |
| 234068_s_at | -0.36144199 | -5.67572598 | 4.52E-07    | 8.34E-06    |
| 234069_at   | 0.038695774 | 1.244833053 | 0.21815136  | 0.384661113 |
| 234070_at   | 0.014932293 | 0.396305249 | 0.693320108 | 0.818108575 |
| 234071_at   | -0.02087245 | -0.61739026 | 0.539370466 | 0.705178135 |
| 234072_at   | 0.010777937 | 0.248088027 | 0.804934102 | 0.890073853 |
| 234073_at   | -0.02161728 | -0.62611712 | 0.533670836 | 0.700464523 |
| 234074_at   | 0.395785484 | 6.076104335 | 9.89E-08    | 2.50E-06    |
| 234075_at   | -0.02204256 | -0.79650816 | 0.428953766 | 0.610029508 |
| 234076_at   | -0.03204839 | -0.96506431 | 0.338480766 | 0.521184579 |
| 234077_at   | -0.02659077 | -0.9721971  | 0.334950791 | 0.517710733 |
| 234078_at   | 0.01971043  | 0.529852102 | 0.598217513 | 0.750398476 |
| 234079_at   | 0.00172448  | 0.047612889 | 0.962186753 | 0.980774327 |
| 234080_at   | -0.04149174 | -1.73468905 | 0.08805635  | 0.197707331 |
| 234081_at   | 0.008679573 | 0.274364118 | 0.784770268 | 0.877218569 |
| 234082_at   | -0.13194994 | -1.22912183 | 0.223941709 | 0.391121296 |
| 234083_at   | -0.02457718 | -0.68945166 | 0.493261808 | 0.666954792 |
| 234084_x_at | 0.353580679 | 7.858608421 | 9.94E-11    | 2.10E-08    |
| 234085_at   | 0.020337401 | 0.60278839  | 0.54897659  | 0.712166897 |
| 234086_at   | 0.005220283 | 0.190806247 | 0.849337292 | 0.917306379 |
| 234087_at   | -0.00570695 | -0.2391932  | 0.811790867 | 0.894495677 |
| 234088_at   | 0.038793436 | 1.088659197 | 0.280763816 | 0.457913939 |
| 234089_at   | -0.03583757 | -0.95381258 | 0.344098805 | 0.526930402 |
| 234090_at   | -0.0542167  | -1.52440143 | 0.13279063  | 0.269354097 |
| 234091_at   | 0.017774024 | 0.497553417 | 0.620661845 | 0.767149943 |
| 234092_s_at | 0.011873907 | 0.293983396 | 0.769809977 | 0.868180703 |
| 234093_at   | -0.03895355 | -1.35558329 | 0.18043645  | 0.336690151 |
| 234094_x_at | -0.00897152 | -0.45486423 | 0.650888565 | 0.788435105 |
| 234095_at   | 0.080181634 | 2.295605551 | 0.025296725 | 0.074394448 |
| 234096_at   | 0.055007826 | 1.778730471 | 0.08047401  | 0.184570689 |
| 234097_s_at | -0.01574169 | -0.76347585 | 0.44824436  | 0.627735937 |
| 234098_at   | 0.137691353 | 3.638703985 | 0.000580665 | 0.003251652 |
| 234099_at   | 0.027934553 | 0.884701347 | 0.379935502 | 0.56262682  |
| 234100_at   | -0.03675202 | -1.08968937 | 0.280313399 | 0.457535814 |
| 234101_at   | -0.04941676 | -1.26263024 | 0.211726428 | 0.37671877  |
| 234102_at   | -0.03399166 | -1.14652794 | 0.256239516 | 0.429767935 |
| 234103_at   | -0.0619118  | -1.16359445 | 0.249307144 | 0.421759213 |
| 234104_at   | 0.02822422  | 0.989158119 | 0.326654943 | 0.50886621  |
| 234105_at   | 0.080526115 | 2.430853756 | 0.018144635 | 0.056958632 |
| 234106_s_at | -0.22400079 | -3.14001858 | 0.002647006 | 0.011551607 |
| 234107_s_at | -0.1366426  | -1.63837482 | 0.106705483 | 0.228515091 |
| 234108_at   | 0.021801092 | 0.830802013 | 0.409459695 | 0.591606514 |
| 234109_x_at | 0.004029579 | 0.11254613  | 0.910775273 | 0.952907881 |
| 234110_at   | -0.08237157 | -3.1326111  | 0.002704764 | 0.011777211 |
| 234111_at   | 0.171161014 | 4.142449242 | 0.000111913 | 0.000809715 |
| 234112_at   | -0.02013203 | -0.57658397 | 0.566430072 | 0.726645984 |
| 234113_at   | -0.0212949  | -0.84430811 | 0.401932964 | 0.584263718 |
| 234114_at   | -0.07919678 | -2.17393079 | 0.033764564 | 0.09358176  |
| 234115_s_at | 0.01499331  | 0.36028948  | 0.719926807 | 0.835957991 |
| 234116_at   | 0.048279596 | 1.303984976 | 0.197340719 | 0.358309351 |
| 234117_at   | -0.02493494 | -0.80487541 | 0.424147071 | 0.605680446 |
| 234118_at   | -0.3405786  | -5.48204337 | 9.35E-07    | 1.51E-05    |
| 234119_at   | 0.038915644 | 1.147465695 | 0.25585507  | 0.429261761 |

|             |             |             |             |             |
|-------------|-------------|-------------|-------------|-------------|
| 234120_at   | 0.045116966 | 1.518200858 | 0.134343812 | 0.271678445 |
| 234121_at   | -0.03702282 | -0.90573756 | 0.368785997 | 0.552042598 |
| 234122_at   | 0.276257133 | 6.130724146 | 8.03E-08    | 2.12E-06    |
| 234123_at   | -0.00055916 | -0.01402972 | 0.988853954 | 0.994831713 |
| 234124_at   | -0.02951041 | -0.79553933 | 0.429512414 | 0.610467608 |
| 234125_at   | 0.076139481 | 2.14614637  | 0.03601603  | 0.098460265 |
| 234126_at   | -0.1030944  | -1.81293562 | 0.074967437 | 0.174584164 |
| 234127_at   | 0.012860364 | 0.316468383 | 0.752772259 | 0.857708385 |
| 234128_at   | -0.01553487 | -0.57306121 | 0.568797079 | 0.72790675  |
| 234129_at   | -0.0560258  | -1.73304703 | 0.088350107 | 0.198144187 |
| 234130_at   | 0.003482139 | 0.057768713 | 0.954129511 | 0.976362422 |
| 234131_at   | 0.030335683 | 0.958576715 | 0.34171264  | 0.524696671 |
| 234132_at   | 0.011208314 | 0.265849528 | 0.79128874  | 0.881133085 |
| 234133_s_at | -0.02937903 | -0.91760179 | 0.362590818 | 0.545747406 |
| 234134_at   | -0.09475431 | -2.65452987 | 0.010210487 | 0.035458627 |
| 234135_x_at | 0.156330679 | 4.525394908 | 3.00E-05    | 0.00026846  |
| 234136_at   | -0.07360338 | -2.47435977 | 0.016264599 | 0.051996023 |
| 234137_s_at | -0.02078809 | -1.04391384 | 0.300815095 | 0.480281088 |
| 234138_at   | -0.01072577 | -0.36737013 | 0.714667159 | 0.832635679 |
| 234139_s_at | -0.04293067 | -1.11464538 | 0.269555684 | 0.445211671 |
| 234140_s_at | -0.15308643 | -2.70815818 | 0.008855154 | 0.031594647 |
| 234141_s_at | -0.00702289 | -0.25110915 | 0.802608676 | 0.888733851 |
| 234142_at   | -0.02033294 | -0.6770842  | 0.501018332 | 0.673472595 |
| 234143_at   | -0.06390417 | -1.96638567 | 0.053999172 | 0.135519485 |
| 234144_at   | 0.025465185 | 0.828908968 | 0.410521489 | 0.592738229 |
| 234145_at   | -0.06442358 | -2.0633129  | 0.043524568 | 0.11443026  |
| 234146_at   | -0.01505384 | -0.40485353 | 0.687060125 | 0.813255584 |
| 234147_at   | -0.07377675 | -2.07712202 | 0.042185651 | 0.111579636 |
| 234148_at   | 0.097316885 | 1.92749554  | 0.058772337 | 0.144559894 |
| 234149_at   | -0.05847534 | -1.42955499 | 0.158157634 | 0.305686155 |
| 234150_at   | 0.027936187 | 0.564103393 | 0.57483774  | 0.732480422 |
| 234151_at   | -0.04677039 | -0.44317013 | 0.659275434 | 0.794066434 |
| 234152_at   | -0.05926179 | -1.63798071 | 0.106787932 | 0.228647836 |
| 234153_at   | -0.00930678 | -0.20842162 | 0.835622932 | 0.909228711 |
| 234154_at   | 0.005667639 | 0.195210653 | 0.845903701 | 0.915410595 |
| 234155_at   | -0.00043259 | -0.0136627  | 0.989145521 | 0.9949255   |
| 234156_at   | -0.00794812 | -0.25533245 | 0.799360912 | 0.886367396 |
| 234157_at   | -0.00492896 | -0.14812344 | 0.88275416  | 0.937308286 |
| 234158_at   | 0.002221433 | 0.063837135 | 0.949317297 | 0.974035067 |
| 234159_at   | 0.115962921 | 3.474065959 | 0.000971089 | 0.00497477  |
| 234160_at   | -0.13958098 | -3.32410876 | 0.001533848 | 0.007298065 |
| 234161_at   | 0.024629988 | 0.755595212 | 0.452920212 | 0.632204076 |
| 234162_at   | 0.027342446 | 1.034471887 | 0.305168352 | 0.485168936 |
| 234163_at   | -0.0722954  | -2.30030509 | 0.025011286 | 0.073753167 |
| 234164_at   | -0.00937904 | -0.32303432 | 0.747819795 | 0.854552858 |
| 234165_at   | -0.06186139 | -1.78453725 | 0.079516113 | 0.182784688 |
| 234166_at   | -0.05148395 | -1.69903722 | 0.094618826 | 0.208752756 |
| 234167_at   | -0.02193938 | -0.7958572  | 0.429329075 | 0.610330651 |
| 234168_at   | -0.01236524 | -0.39127011 | 0.697017497 | 0.820673006 |
| 234169_at   | -0.02043373 | -0.52425862 | 0.602077295 | 0.753156953 |
| 234170_at   | -0.15592026 | -3.64662915 | 0.00056629  | 0.003182273 |
| 234171_at   | 0.027911268 | 0.957284957 | 0.342358555 | 0.525327492 |
| 234172_at   | -0.04824799 | -1.07779671 | 0.285543846 | 0.463330994 |
| 234173_s_at | 0.008388577 | 0.264767744 | 0.792118    | 0.881551313 |
| 234174_at   | 0.020775819 | 0.614318288 | 0.541384227 | 0.706584984 |
| 234175_at   | -0.02575882 | -0.74394256 | 0.459885638 | 0.638404479 |
| 234176_at   | 0.006012994 | 0.163569335 | 0.870633338 | 0.930159402 |
| 234177_at   | -0.07160451 | -1.87553538 | 0.065706587 | 0.157913465 |
| 234178_at   | -0.03039146 | -0.87079566 | 0.387421186 | 0.569991364 |
| 234179_at   | -0.02340659 | -0.76658914 | 0.446404918 | 0.626292607 |
| 234180_at   | -0.05447621 | -1.83025688 | 0.072301548 | 0.169809279 |
| 234181_at   | 0.008435236 | 0.277005617 | 0.782751149 | 0.875815896 |
| 234182_at   | 0.089877318 | 2.322870122 | 0.023680209 | 0.070676901 |
| 234183_at   | -0.04327919 | -1.92016792 | 0.059710823 | 0.146465209 |
| 234184_at   | 0.032550861 | 1.059632567 | 0.293662436 | 0.472201252 |
| 234185_at   | -0.07949101 | -2.71468189 | 0.00870204  | 0.031158737 |
| 234186_at   | -0.06939396 | -1.70672635 | 0.093170457 | 0.206341629 |
| 234187_at   | -0.0287537  | -0.80347383 | 0.424949969 | 0.606342635 |
| 234188_at   | 0.067039268 | 2.068599927 | 0.043007655 | 0.113290431 |
| 234189_at   | -0.06737489 | -2.25670419 | 0.027772667 | 0.079990723 |
| 234190_at   | 0.009523658 | 0.26003005  | 0.795752589 | 0.88402478  |
| 234191_at   | -0.07060642 | -1.73363407 | 0.088244993 | 0.198000468 |
| 234192_s_at | 0.552891302 | 6.732277322 | 7.91E-09    | 3.77E-07    |
| 234193_at   | 0.03861092  | 0.619103734 | 0.538248908 | 0.704342816 |
| 234194_at   | -0.03038796 | -0.87970363 | 0.382615303 | 0.565302758 |

|             |              |             |             |             |
|-------------|--------------|-------------|-------------|-------------|
| 234195_at   | 0.02096127   | 0.673885834 | 0.503034992 | 0.675185147 |
| 234196_at   | 0.259587586  | 4.322708124 | 6.06E-05    | 0.00048318  |
| 234197_at   | 0.001082284  | 0.033954894 | 0.97302858  | 0.986372039 |
| 234198_at   | -0.03105563  | -1.07318387 | 0.287590696 | 0.465784165 |
| 234199_at   | -0.043102989 | -0.86826169 | 0.388795141 | 0.571598817 |
| 234200_at   | 0.043190866  | 1.200837906 | 0.234648356 | 0.403497666 |
| 234201_x_at | 0.051662969  | 1.87926432  | 0.065186874 | 0.156942938 |
| 234202_at   | -0.02372689  | -0.6803649  | 0.498954325 | 0.671848347 |
| 234203_at   | -0.02746402  | -0.84626242 | 0.400850952 | 0.583154029 |
| 234204_at   | -0.08179344  | -1.90029289 | 0.062320735 | 0.151534511 |
| 234205_at   | -0.00038013  | -0.0140698  | 0.988822116 | 0.994831713 |
| 234206_at   | -0.01025945  | -0.23518744 | 0.814883659 | 0.896358867 |
| 234207_at   | 0.078698101  | 2.287113474 | 0.025819854 | 0.075641212 |
| 234208_at   | -0.11267383  | -2.95712128 | 0.004471339 | 0.017999738 |
| 234209_at   | 0.019178723  | 0.767967036 | 0.445592215 | 0.625725886 |
| 234210_x_at | 0.020655157  | 0.721408169 | 0.473528651 | 0.649528649 |
| 234211_at   | 0.057739448  | 1.239755329 | 0.220010554 | 0.386916605 |
| 234212_at   | -0.03690323  | -1.18884846 | 0.239297411 | 0.409115178 |
| 234213_at   | -0.01138763  | -0.35453788 | 0.724209255 | 0.838818249 |
| 234214_at   | -0.02470518  | -0.71948603 | 0.47470285  | 0.650659994 |
| 234215_at   | -0.01850598  | -0.51882052 | 0.605840854 | 0.755728465 |
| 234216_at   | -0.02433509  | -0.70763656 | 0.481977594 | 0.657144593 |
| 234217_at   | 0.003950726  | 0.12714648  | 0.899260008 | 0.94612223  |
| 234218_at   | -0.09727404  | -2.32727826 | 0.023427665 | 0.070030713 |
| 234219_at   | -0.08230398  | -2.1426963  | 0.036304569 | 0.099109633 |
| 234220_at   | -0.09316404  | -2.93761687 | 0.00472329  | 0.01882744  |
| 234221_at   | 0.014377419  | 0.663849124 | 0.50939189  | 0.680420642 |
| 234222_at   | 0.037681525  | 1.252725833 | 0.215284475 | 0.381139826 |
| 234223_at   | 0.09565509   | 1.896378127 | 0.062846061 | 0.152514996 |
| 234224_at   | 0.018062933  | 0.427000981 | 0.670944317 | 0.801803396 |
| 234225_at   | 0.028562447  | 0.954364413 | 0.343821858 | 0.526632616 |
| 234226_at   | -0.12952739  | -3.43758049 | 0.001086426 | 0.005453728 |
| 234227_at   | 0.001392907  | 0.05125236  | 0.959298836 | 0.979133132 |
| 234228_at   | 0.003260279  | 0.118126518 | 0.906371626 | 0.950319277 |
| 234229_at   | -0.03324207  | -1.1581727  | 0.251494721 | 0.424445558 |
| 234230_at   | -0.04867411  | -1.57305076 | 0.121094274 | 0.251263551 |
| 234231_at   | 0.043753095  | 1.143961001 | 0.257293969 | 0.430996329 |
| 234232_at   | -0.02783931  | -0.96908076 | 0.336490047 | 0.519318087 |
| 234233_s_at | -0.02576398  | -1.01419513 | 0.314661336 | 0.495938935 |
| 234234_at   | -0.05293673  | -1.96796344 | 0.053812739 | 0.135127484 |
| 234235_at   | 0.170825118  | 5.701407466 | 4.10E-07    | 7.72E-06    |
| 234236_at   | -0.02968416  | -1.01393099 | 0.314786296 | 0.496088682 |
| 234237_s_at | -0.04338413  | -1.18071044 | 0.242490769 | 0.413105034 |
| 234238_at   | -0.00253691  | -0.06009294 | 0.952286205 | 0.975510568 |
| 234239_at   | 0.059589302  | 1.713515955 | 0.091906746 | 0.204210814 |
| 234240_at   | -0.03568884  | -0.85750047 | 0.394663861 | 0.577285024 |
| 234241_at   | -0.08796708  | -2.82320928 | 0.00648632  | 0.02443208  |
| 234242_at   | -0.08577579  | -2.46338838 | 0.016721386 | 0.053204627 |
| 234243_at   | 0.058296807  | 1.944334639 | 0.056663171 | 0.140696175 |
| 234244_at   | -0.06935733  | -1.6966325  | 0.095075576 | 0.209470921 |
| 234245_at   | 0.041674188  | 1.013475717 | 0.315001763 | 0.496265468 |
| 234246_at   | 0.005872244  | 0.177486295 | 0.85973886  | 0.923523833 |
| 234247_at   | 0.155318941  | 2.659911487 | 0.01006639  | 0.035084386 |
| 234248_at   | -0.08837112  | -2.63675644 | 0.010699865 | 0.036820752 |
| 234249_at   | -0.00673213  | -0.16816642 | 0.867031754 | 0.928040023 |
| 234250_at   | -0.02516954  | -0.65317242 | 0.516201219 | 0.68613942  |
| 234251_at   | 0.063970216  | 1.57421419  | 0.120825018 | 0.250855325 |
| 234252_at   | 0.033593345  | 1.09264748  | 0.279022842 | 0.455911409 |
| 234253_at   | -0.02962892  | -0.91870797 | 0.362016627 | 0.545196358 |
| 234254_at   | -0.03032837  | -0.85343379 | 0.396895891 | 0.579277985 |
| 234255_at   | 0.043742565  | 1.12153755  | 0.266636568 | 0.441941905 |
| 234256_at   | -0.03857451  | -1.19594084 | 0.236539266 | 0.405825741 |
| 234257_at   | -0.11082613  | -2.86315979 | 0.0058112   | 0.022300717 |
| 234258_at   | 0.106615238  | 2.8183056   | 0.006573999 | 0.02471651  |
| 234259_at   | 0.02893389   | -0.71615974 | 0.476738693 | 0.652469933 |
| 234260_at   | 0.090461455  | 1.740174287 | 0.087080894 | 0.196071304 |
| 234261_at   | -0.20864423  | -3.31923559 | 0.001556512 | 0.007390061 |
| 234262_at   | 0.077729096  | 2.026903794 | 0.047232577 | 0.121983144 |
| 234263_at   | 0.030820201  | 0.990593287 | 0.32595932  | 0.508105396 |
| 234264_at   | 0.018580787  | 0.51281814  | 0.610007431 | 0.759103751 |
| 234265_at   | -0.01001787  | -0.30152472 | 0.764082445 | 0.864340707 |
| 234266_at   | -0.09910911  | -2.73249083 | 0.008296329 | 0.029973546 |
| 234267_at   | -0.08328349  | -2.48619361 | 0.015784538 | 0.050725719 |
| 234268_at   | -0.22077574  | -4.11385368 | 0.000123211 | 0.00088006  |
| 234269_at   | -0.11043817  | -3.62838345 | 0.000599909 | 0.003336794 |



|             |             |             |             |             |
|-------------|-------------|-------------|-------------|-------------|
| 234270_at   | -0.03122572 | -0.86289121 | 0.391717134 | 0.57453389  |
| 234271_at   | 0.101416374 | 1.97976594  | 0.052435538 | 0.132413214 |
| 234272_at   | 0.009851302 | 0.367097393 | 0.7148695   | 0.832746136 |
| 234273_at   | -0.04052437 | -1.23704132 | 0.22100905  | 0.387921813 |
| 234274_at   | 0.001846602 | 0.049115644 | 0.960994255 | 0.980162381 |
| 234275_at   | 0.004560099 | 0.151342659 | 0.880225526 | 0.935819378 |
| 234276_at   | 0.082402716 | 1.82092699  | 0.073727434 | 0.172343035 |
| 234277_at   | -0.02078806 | -0.80092583 | 0.42641193  | 0.607710768 |
| 234278_at   | 0.199755907 | 4.992419133 | 5.67E-06    | 6.68E-05    |
| 234279_at   | 0.060324105 | 1.470306276 | 0.146831099 | 0.28970798  |
| 234280_at   | 0.017121509 | 0.412698582 | 0.681334415 | 0.809436659 |
| 234281_at   | 0.033551075 | 0.847139302 | 0.400366047 | 0.582763137 |
| 234282_at   | 0.184597744 | 4.268798628 | 7.29E-05    | 0.00056549  |
| 234283_at   | 0.071377181 | 1.88693832  | 0.06412826  | 0.155014004 |
| 234284_at   | 0.136719015 | 3.256777324 | 0.001876449 | 0.008650946 |
| 234285_at   | -0.09062648 | -2.04906491 | 0.044944477 | 0.117362463 |
| 234286_at   | 0.006200473 | 0.195532739 | 0.845652726 | 0.915240087 |
| 234287_at   | -0.06037277 | -1.60832284 | 0.113142567 | 0.238821499 |
| 234288_at   | -0.0199338  | -0.66967823 | 0.505694694 | 0.677331114 |
| 234289_x_at | -0.07797851 | -2.78382702 | 0.007222006 | 0.026719032 |
| 234290_x_at | 0.079588347 | 2.21977676  | 0.030318838 | 0.085829736 |
| 234291_s_at | -0.102009   | -2.3015829  | 0.024934171 | 0.073569551 |
| 234292_s_at | 0.013548051 | 0.400884535 | 0.689963951 | 0.815397015 |
| 234293_x_at | 0.063309749 | 1.696391972 | 0.09512136  | 0.209551132 |
| 234294_x_at | 0.125019307 | 3.154659928 | 0.00253623  | 0.011135594 |
| 234295_at   | 0.064610818 | 1.423613345 | 0.159864327 | 0.308198451 |
| 234296_s_at | 0.00535455  | 0.263475718 | 0.79310874  | 0.882302379 |
| 234297_at   | -0.02963084 | -0.70751915 | 0.482049982 | 0.657203191 |
| 234298_at   | -0.1007349  | -2.3340383  | 0.023045035 | 0.069076375 |
| 234299_s_at | -0.05161889 | -0.99958491 | 0.321623596 | 0.503520572 |
| 234300_s_at | -0.02793453 | -1.04213271 | 0.301633029 | 0.481225979 |
| 234301_s_at | 0.028993113 | 0.681138696 | 0.498468181 | 0.671434943 |
| 234302_s_at | -0.08739784 | -1.91252013 | 0.060703885 | 0.148388012 |
| 234303_s_at | -0.64556474 | -6.28697251 | 4.41E-08    | 1.33E-06    |
| 234304_s_at | 0.031601519 | 0.427129113 | 0.670851521 | 0.801759378 |
| 234305_s_at | -0.00690732 | -0.21094476 | 0.833662643 | 0.90809064  |
| 234306_s_at | 0.017822348 | 0.496251498 | 0.621574387 | 0.767598854 |
| 234307_s_at | 0.207432376 | 4.467849316 | 3.67E-05    | 0.000318369 |
| 234308_at   | 0.011086758 | 0.36997673  | 0.712734406 | 0.83125068  |
| 234309_at   | -0.05083578 | -1.53096738 | 0.131161505 | 0.267006923 |
| 234310_s_at | 0.080666966 | 2.082004704 | 0.041720859 | 0.11054655  |
| 234311_s_at | -0.04422342 | -0.86593195 | 0.390061043 | 0.572988697 |
| 234312_s_at | 0.140949933 | 3.981091579 | 0.000191777 | 0.001271461 |
| 234313_at   | -0.05545567 | -1.2335138  | 0.222311818 | 0.389385475 |
| 234314_at   | -0.56077396 | -5.15568359 | 3.13E-06    | 4.10E-05    |
| 234315_at   | 0.001438001 | 0.045583718 | 0.963797122 | 0.981363824 |
| 234316_x_at | 0.032672227 | 1.275028034 | 0.207334336 | 0.371092757 |
| 234317_s_at | -0.16525033 | -3.46826111 | 0.000988626 | 0.005048644 |
| 234318_x_at | 0.034913197 | 1.201889594 | 0.234243703 | 0.403112035 |
| 234319_at   | 0.033873802 | 0.738066487 | 0.463421291 | 0.641329599 |
| 234320_at   | -0.04988052 | -1.26353873 | 0.211402257 | 0.376323973 |
| 234321_x_at | 0.104261837 | 3.1964836   | 0.002243274 | 0.010045732 |
| 234322_at   | 0.051029385 | 1.649153002 | 0.104470623 | 0.225120592 |
| 234323_at   | 0.067326104 | 1.862214318 | 0.067591885 | 0.161454652 |
| 234324_at   | -0.04939692 | -1.22009725 | 0.227318268 | 0.394880498 |
| 234325_at   | -0.03826515 | -1.18434794 | 0.241059634 | 0.411246982 |
| 234326_at   | 0.117756355 | 2.706883539 | 0.008885357 | 0.031687232 |
| 234327_at   | -0.06858001 | -1.94806167 | 0.056205178 | 0.139799746 |
| 234328_at   | -0.03992408 | -0.99067392 | 0.325920265 | 0.508105396 |
| 234329_at   | -0.10794496 | -2.79534382 | 0.006999285 | 0.026041628 |
| 234330_at   | 0.007542796 | 0.325250749 | 0.746150409 | 0.853153594 |
| 234331_s_at | -0.33035735 | -4.7148745  | 1.54E-05    | 0.000153349 |
| 234332_at   | -0.05325465 | -2.20788595 | 0.031181415 | 0.087838627 |
| 234333_at   | 0.025816905 | 0.767363295 | 0.445948203 | 0.625912854 |
| 234334_s_at | -0.0452941  | -1.56935759 | 0.121952186 | 0.252608783 |
| 234335_s_at | -0.23082146 | -5.10784191 | 3.73E-06    | 4.73E-05    |
| 234336_s_at | 0.019344582 | 0.414831905 | 0.679780643 | 0.808127799 |
| 234337_at   | 0.047719166 | 1.374834652 | 0.174420013 | 0.328494699 |
| 234338_s_at | 0.09399202  | 3.17108705  | 0.002417126 | 0.010680856 |
| 234339_s_at | 0.127351947 | 2.610787992 | 0.011453408 | 0.038961389 |
| 234340_at   | 0.055762984 | 2.126884637 | 0.037652943 | 0.101968449 |
| 234341_x_at | 0.055783271 | 1.624022398 | 0.10974163  | 0.233517733 |
| 234342_at   | -0.02149207 | -0.5617915  | 0.576401795 | 0.733709742 |
| 234343_s_at | -0.07713839 | -2.15561168 | 0.035234695 | 0.096744424 |
| 234344_at   | -0.02772155 | -0.8484386  | 0.399648214 | 0.58196293  |

|             |              |             |             |             |
|-------------|--------------|-------------|-------------|-------------|
| 234345_at   | -0.02500978  | -0.55505516 | 0.580970798 | 0.737132266 |
| 234346_x_at | 0.062450417  | 1.889180388 | 0.063821733 | 0.154396498 |
| 234347_s_at | -0.07868931  | -2.22211656 | 0.030151603 | 0.085460137 |
| 234348_at   | -0.05045535  | -1.34430679 | 0.184033295 | 0.341260572 |
| 234349_at   | -0.0019719   | -0.0690039  | 0.945221574 | 0.971770666 |
| 234350_at   | -0.011105387 | -0.30748157 | 0.759567628 | 0.861513662 |
| 234351_x_at | 0.193548933  | 3.53177385  | 0.000812088 | 0.004283973 |
| 234352_x_at | -0.05210994  | -1.3148294  | 0.193692634 | 0.353702345 |
| 234353_at   | -0.00222453  | -0.07807508 | 0.938034465 | 0.96750215  |
| 234354_x_at | -0.02750761  | -0.87226721 | 0.386624689 | 0.569325555 |
| 234355_s_at | -9.35E-05    | -0.0028941  | 0.997700683 | 0.998862879 |
| 234356_at   | -0.02454027  | -0.73966856 | 0.462455779 | 0.640532856 |
| 234357_at   | -0.03131158  | -0.73607714 | 0.464621799 | 0.642367182 |
| 234358_at   | -0.13628588  | -3.8804645  | 0.000266945 | 0.001683407 |
| 234359_at   | -0.00934605  | -0.30329745 | 0.762737991 | 0.863563011 |
| 234360_at   | -0.00779527  | -0.26667169 | 0.790658657 | 0.880725019 |
| 234361_at   | 0.02228337   | 0.669513758 | 0.505798814 | 0.677429968 |
| 234362_s_at | 0.010278859  | 0.238316599 | 0.81246742  | 0.894770014 |
| 234363_at   | -0.01550113  | -0.38378413 | 0.702528224 | 0.824397924 |
| 234364_at   | -0.00763999  | -0.21832419 | 0.827935498 | 0.904431298 |
| 234365_at   | -0.00806969  | -0.25964448 | 0.796048587 | 0.884165407 |
| 234366_x_at | 0.008630439  | 0.229474221 | 0.819299884 | 0.89930618  |
| 234367_x_at | 0.033863989  | 1.176002275 | 0.244352234 | 0.41543691  |
| 234368_at   | 0.004052985  | 0.10841182  | 0.9140396   | 0.954246988 |
| 234369_at   | 0.026499403  | 0.744521148 | 0.459538341 | 0.638051515 |
| 234370_at   | -0.07250023  | -1.77198144 | 0.081599404 | 0.186510539 |
| 234371_at   | -0.0289818   | -0.79800801 | 0.428089772 | 0.609324758 |
| 234372_at   | -0.02898196  | -0.71081891 | 0.480017766 | 0.655407994 |
| 234373_x_at | 0.105875199  | 2.5179209   | 0.014559909 | 0.047386504 |
| 234374_at   | -0.0505146   | -1.23893164 | 0.220313243 | 0.387302019 |
| 234375_x_at | 0.01817422   | 0.628165896 | 0.532337292 | 0.6993509   |
| 234376_at   | 0.031887098  | 1.034910236 | 0.304965304 | 0.484950295 |
| 234377_at   | -0.00072935  | -0.02397813 | 0.980951563 | 0.990424012 |
| 234378_at   | -0.00205606  | -0.07693224 | 0.938939667 | 0.968140725 |
| 234379_at   | -0.01683772  | -0.42199556 | 0.674573343 | 0.804483839 |
| 234380_x_at | 0.024125452  | 0.463089391 | 0.645016543 | 0.784495709 |
| 234381_at   | 0.005998485  | 0.139482657 | 0.889547318 | 0.940850757 |
| 234382_x_at | 0.13897389   | 3.907281799 | 0.000244523 | 0.001564646 |
| 234383_x_at | -0.02172621  | -0.83125121 | 0.409207993 | 0.591429474 |
| 234384_at   | -0.0434183   | -1.21758752 | 0.228263869 | 0.395701053 |
| 234385_at   | -0.01290268  | -0.35774807 | 0.721817953 | 0.837342659 |
| 234386_s_at | 0.026881401  | 0.97234623  | 0.334877247 | 0.517651285 |
| 234387_at   | -0.02452541  | -0.62207156 | 0.536309162 | 0.70256563  |
| 234388_at   | -0.03187224  | -1.2110687  | 0.230733417 | 0.398883562 |
| 234389_x_at | -0.12374915  | -2.90745206 | 0.005139016 | 0.020153818 |
| 234390_x_at | -0.05738597  | -2.0293465  | 0.046975538 | 0.121466717 |
| 234392_at   | 0.00161715   | 0.057917395 | 0.954011586 | 0.976304669 |
| 234393_at   | 0.056379147  | 1.547850226 | 0.127045528 | 0.260754018 |
| 234394_at   | 0.015748695  | 0.363062914 | 0.717865009 | 0.834816241 |
| 234395_at   | 0.029045755  | 0.710375489 | 0.480290574 | 0.655624507 |
| 234396_at   | 0.015797057  | 0.421300736 | 0.675077718 | 0.804784693 |
| 234397_at   | -0.01639131  | -0.39914569 | 0.691237618 | 0.816492008 |
| 234398_at   | -0.03793566  | -1.25379367 | 0.214898754 | 0.38064803  |
| 234399_at   | 0.001618091  | 0.050607131 | 0.959810787 | 0.979448278 |
| 234400_at   | -0.00177628  | -0.04558595 | 0.963795347 | 0.981363824 |
| 234401_at   | -0.05484137  | -1.66243368 | 0.101769465 | 0.220640387 |
| 234402_at   | -0.03210503  | -1.08250254 | 0.283466162 | 0.460928781 |
| 234403_at   | 0.001781626  | 0.055409422 | 0.956000885 | 0.977385549 |
| 234404_at   | 0.013469479  | 0.32397592  | 0.747110443 | 0.854026139 |
| 234405_s_at | -0.02305472  | -0.31480635 | 0.754027544 | 0.858533951 |
| 234406_at   | 0.046462304  | 1.407199373 | 0.164653371 | 0.315025834 |
| 234407_s_at | -0.04512546  | -1.29277046 | 0.201167312 | 0.363314052 |
| 234408_at   | -0.08567322  | -2.23859925 | 0.028996386 | 0.08289027  |
| 234409_at   | -0.03809792  | -1.26295414 | 0.211610809 | 0.376605219 |
| 234410_at   | -0.01533235  | -0.65443509 | 0.515393406 | 0.685636615 |
| 234411_x_at | 0.10160771   | 2.237236924 | 0.029090364 | 0.083089828 |
| 234412_at   | -0.0001682   | -0.00412106 | 0.996725887 | 0.998529588 |
| 234413_at   | -0.08731112  | -1.61920191 | 0.110776946 | 0.235127435 |
| 234414_at   | 0.003346947  | 0.096581343 | 0.923388618 | 0.95990135  |
| 234415_x_at | 0.070415919  | 2.322377887 | 0.02370856  | 0.070728453 |
| 234416_at   | -0.01070347  | -0.46289059 | 0.645158203 | 0.784625296 |
| 234417_at   | -0.02386528  | -0.63659378 | 0.526869859 | 0.694976954 |
| 234418_x_at | -0.01500607  | -0.36646568 | 0.71533824  | 0.833135189 |
| 234419_x_at | -0.01320088  | -0.30888547 | 0.7585048   | 0.86112413  |
| 234420_at   | -0.05380021  | -1.95248792 | 0.055665373 | 0.138789224 |

|             |             |             |             |             |
|-------------|-------------|-------------|-------------|-------------|
| 234421_s_at | -0.00465311 | -0.13116325 | 0.896095698 | 0.944272726 |
| 234422_at   | 0.024692309 | 0.636422083 | 0.526980951 | 0.695051872 |
| 234423_x_at | 0.104110249 | 2.334107404 | 0.023041152 | 0.069073999 |
| 234424_at   | 0.004156192 | 0.134648632 | 0.893351368 | 0.942985632 |
| 234425_at   | 0.014124406 | 0.368637324 | 0.71372732  | 0.831970099 |
| 234426_x_at | -0.030389   | -1.14651868 | 0.256243314 | 0.429767935 |
| 234427_at   | -0.02611865 | -0.89420804 | 0.374870725 | 0.558048179 |
| 234428_at   | 0.005527858 | 0.289988595 | 0.772849222 | 0.869941615 |
| 234429_at   | 0.03580357  | 0.880525487 | 0.382173805 | 0.564946384 |
| 234430_at   | 0.098340503 | 3.590132696 | 0.000676676 | 0.003691173 |
| 234431_at   | 0.104256861 | 1.869627755 | 0.066537122 | 0.159480697 |
| 234432_at   | 0.006069544 | 0.326783196 | 0.744996906 | 0.852291353 |
| 234433_at   | -0.03691424 | -1.33618505 | 0.186657427 | 0.344557999 |
| 234434_at   | -0.03727835 | -0.88031683 | 0.382285867 | 0.565017227 |
| 234435_at   | 0.011687354 | 0.322469603 | 0.748245324 | 0.854852568 |
| 234436_x_at | -0.0186528  | -0.60538418 | 0.547262589 | 0.710789295 |
| 234437_at   | -0.05111151 | -1.62509507 | 0.109512319 | 0.233151895 |
| 234438_at   | 0.059665621 | 1.938455153 | 0.057392142 | 0.142072095 |
| 234439_at   | -0.00721677 | -0.14850145 | 0.882457179 | 0.937091377 |
| 234440_at   | 0.019660301 | 0.576898175 | 0.566219189 | 0.72654229  |
| 234441_at   | -0.0483021  | -1.32844147 | 0.189185691 | 0.347731314 |
| 234442_at   | -0.06143723 | -1.61994463 | 0.110616916 | 0.234877005 |
| 234443_at   | 0.001032543 | 0.02852102  | 0.977343571 | 0.988635229 |
| 234444_at   | -0.03859743 | -0.88723062 | 0.378583816 | 0.561183016 |
| 234445_at   | 0.021941726 | 0.579037808 | 0.564784165 | 0.725242325 |
| 234446_at   | 0.035368937 | 1.236497681 | 0.221209458 | 0.388167123 |
| 234447_at   | 0.000726643 | 0.021267197 | 0.983104803 | 0.991739271 |
| 234448_at   | -0.01858042 | -0.53977264 | 0.591400345 | 0.745251769 |
| 234449_at   | -0.01693099 | -0.43739749 | 0.663431843 | 0.796874219 |
| 234450_at   | -0.00383366 | -0.09363609 | 0.925717841 | 0.961003967 |
| 234451_at   | -0.03876564 | -0.93133549 | 0.355503442 | 0.538563432 |
| 234452_at   | -0.01189191 | -0.42482132 | 0.672523649 | 0.802967833 |
| 234453_s_at | -0.03743275 | -1.17169026 | 0.24606608  | 0.417556489 |
| 234454_at   | 0.021842719 | 0.644615854 | 0.521693135 | 0.690543466 |
| 234455_at   | 0.003301714 | 0.135244554 | 0.89288228  | 0.942727086 |
| 234456_at   | 0.005785099 | 0.162879093 | 0.871174347 | 0.9304685   |
| 234457_at   | 0.019440255 | 0.724358102 | 0.471729779 | 0.648041073 |
| 234458_at   | 0.027023283 | 0.740147336 | 0.462167464 | 0.640283076 |
| 234459_at   | -0.03876598 | -1.10966583 | 0.271678671 | 0.447611061 |
| 234460_at   | -0.01421024 | -0.36360588 | 0.717461608 | 0.83463311  |
| 234461_at   | 0.043067798 | 1.280026259 | 0.205582952 | 0.368888798 |
| 234462_at   | 0.036933339 | 0.898560369 | 0.372566335 | 0.555672773 |
| 234463_at   | -0.0784379  | -1.90378471 | 0.061855314 | 0.150617724 |
| 234464_s_at | -0.04257202 | -1.06200525 | 0.292593016 | 0.471108595 |
| 234465_at   | -0.01395465 | -0.43952645 | 0.661897703 | 0.795773338 |
| 234466_at   | 0.03472391  | 0.891533528 | 0.376291252 | 0.559045563 |
| 234467_at   | 0.05473358  | 1.714290013 | 0.091763577 | 0.203953539 |
| 234468_at   | -0.01098733 | -0.3330641  | 0.740275295 | 0.849294701 |
| 234469_at   | -0.0669826  | -1.7409165  | 0.086949593 | 0.195834865 |
| 234470_at   | 0.051050439 | 1.403918305 | 0.165623835 | 0.316435552 |
| 234471_s_at | -0.05258453 | -1.58688234 | 0.117924194 | 0.24648153  |
| 234472_at   | -0.27728265 | -3.86418209 | 0.000281509 | 0.001764051 |
| 234473_at   | 0.027401604 | 0.875214441 | 0.385032536 | 0.567691808 |
| 234474_x_at | 0.01086837  | 0.357778674 | 0.721795171 | 0.837342659 |
| 234475_x_at | -0.07111805 | -2.45147454 | 0.017230467 | 0.05455643  |
| 234476_at   | 0.177967514 | 2.875814875 | 0.005611284 | 0.021669362 |
| 234477_at   | -0.05764318 | -1.56896429 | 0.122043837 | 0.252775195 |
| 234478_at   | 0.011685076 | 0.41133287  | 0.682329838 | 0.810026896 |
| 234479_at   | -0.09442635 | -2.29751046 | 0.025180679 | 0.074145138 |
| 234480_at   | -0.22702172 | -3.2204318  | 0.002090162 | 0.009456723 |
| 234481_at   | 0.044664166 | 1.092207933 | 0.279214344 | 0.456123711 |
| 234482_at   | -0.07990871 | -1.88239677 | 0.064752986 | 0.156150675 |
| 234483_at   | 0.016895948 | 0.553574004 | 0.58197774  | 0.737948503 |
| 234484_s_at | 0.061845796 | 1.794640392 | 0.077872148 | 0.179765601 |
| 234485_at   | -0.17140943 | -4.83482104 | 1.00E-05    | 0.000107014 |
| 234486_at   | -0.01973104 | -0.44059893 | 0.66112542  | 0.795365078 |
| 234487_at   | -0.05333406 | -1.64063033 | 0.106234614 | 0.227845157 |
| 234488_s_at | 0.07660367  | 2.413019823 | 0.018970135 | 0.059060485 |
| 234489_at   | 0.204486965 | 3.118338843 | 0.002819391 | 0.012193172 |
| 234490_at   | 0.023564962 | 0.791700993 | 0.431729948 | 0.612574603 |
| 234491_s_at | 0.334746717 | 4.328719582 | 5.94E-05    | 0.000475258 |
| 234492_at   | 0.037204318 | 0.796467885 | 0.428976979 | 0.610029508 |
| 234493_at   | -0.02986209 | -0.86413659 | 0.391038331 | 0.573858445 |
| 234494_x_at | -0.03653574 | -1.0348859  | 0.304976573 | 0.484950295 |
| 234495_at   | -0.04550039 | -0.75020645 | 0.45613375  | 0.635083011 |

|             |             |             |             |             |
|-------------|-------------|-------------|-------------|-------------|
| 234496_x_at | 0.032994627 | 0.714659142 | 0.477658733 | 0.653260857 |
| 234497_s_at | 0.113036491 | 2.699327993 | 0.009066335 | 0.032240024 |
| 234498_at   | -0.10218555 | -2.28158908 | 0.026165298 | 0.076485021 |
| 234499_at   | 0.003713029 | 0.084178534 | 0.933201569 | 0.965319859 |
| 234500_at   | -0.04510511 | -1.44623281 | 0.153442653 | 0.299043216 |
| 234501_x_at | 0.027518555 | 1.500806775 | 0.138777828 | 0.278277938 |
| 234502_at   | -0.04154546 | -1.37299147 | 0.174989308 | 0.329247764 |
| 234503_at   | -0.00451762 | -0.11107541 | 0.911936332 | 0.953429681 |
| 234504_at   | 0.039362093 | 1.387183997 | 0.170642256 | 0.323321013 |
| 234505_at   | 0.163272157 | 3.979176591 | 0.000192996 | 0.00127783  |
| 234506_at   | 0.04143268  | 1.253876426 | 0.214868882 | 0.380615144 |
| 234507_at   | -0.01231924 | -0.36288149 | 0.717999813 | 0.834929557 |
| 234508_at   | 0.00670872  | 0.198944232 | 0.84299542  | 0.913713562 |
| 234509_at   | -0.00572328 | -0.13868416 | 0.890175504 | 0.941198401 |
| 234510_at   | -0.04740526 | -1.08475906 | 0.282473614 | 0.459768037 |
| 234511_at   | -0.0220047  | -0.67007548 | 0.50544326  | 0.677136396 |
| 234512_x_at | -0.05884645 | -1.75399742 | 0.08466231  | 0.191787494 |
| 234513_at   | -0.02563959 | -0.623577   | 0.535326597 | 0.70175157  |
| 234514_at   | 0.044624767 | 0.846283724 | 0.400839167 | 0.583154029 |
| 234515_at   | -0.02752103 | -0.65419527 | 0.515546781 | 0.685766593 |
| 234516_at   | 0.006286608 | 0.179945703 | 0.857816367 | 0.922462201 |
| 234517_at   | 0.009923501 | 0.344401261 | 0.731778162 | 0.843495741 |
| 234518_at   | -0.0479953  | -1.16238341 | 0.249794587 | 0.422203387 |
| 234519_at   | 0.01687361  | 0.461134346 | 0.646410231 | 0.785442649 |
| 234520_at   | 0.023341008 | 0.766592292 | 0.446403057 | 0.626292607 |
| 234521_at   | 0.010644439 | 0.268005382 | 0.789636858 | 0.880192808 |
| 234522_at   | -0.1109451  | -2.9479474  | 0.004588247 | 0.018376012 |
| 234523_at   | -0.12364074 | -2.84156715 | 0.006167573 | 0.023448846 |
| 234524_at   | 0.007612445 | 0.200771206 | 0.841573092 | 0.912969017 |
| 234525_at   | 0.002691819 | 0.067440179 | 0.946460995 | 0.972391833 |
| 234526_at   | -0.02238382 | -0.51600985 | 0.607790266 | 0.757399134 |
| 234527_at   | -0.03689681 | -1.13654941 | 0.260355846 | 0.43452922  |
| 234528_at   | -0.0302469  | -0.96988376 | 0.336092973 | 0.518902378 |
| 234529_at   | -0.03111973 | -1.15025359 | 0.254714566 | 0.427942687 |
| 234530_s_at | -0.02393003 | -0.50876987 | 0.612824904 | 0.761207058 |
| 234531_at   | 0.062533688 | 1.77828021  | 0.080548686 | 0.184691592 |
| 234532_at   | 0.028228607 | 0.962343425 | 0.33983375  | 0.522709594 |
| 234533_at   | -0.04638805 | -1.16676105 | 0.248035806 | 0.42019697  |
| 234534_at   | -0.06629071 | -1.75265986 | 0.084893875 | 0.192241441 |
| 234535_at   | 0.019393398 | 0.611301344 | 0.543365659 | 0.707949917 |
| 234536_at   | 0.030896722 | 0.619769057 | 0.537813744 | 0.703835193 |
| 234537_at   | 0.003572904 | 0.097037244 | 0.923028133 | 0.959727644 |
| 234538_at   | -0.12420167 | -2.9887189  | 0.00408953  | 0.016706514 |
| 234539_at   | -0.00205543 | -0.05807502 | 0.953886568 | 0.976277246 |
| 234540_at   | -0.05237498 | -1.21976587 | 0.227442961 | 0.394921357 |
| 234541_s_at | 0.005991753 | 0.188929296 | 0.850801423 | 0.918122108 |
| 234542_at   | -0.04551925 | -1.47286879 | 0.146140691 | 0.288740926 |
| 234543_at   | 0.005263044 | 0.142767192 | 0.886964094 | 0.939274442 |
| 234544_at   | 0.018286438 | 0.775672092 | 0.441063638 | 0.621382507 |
| 234545_at   | -0.02880685 | -0.75149248 | 0.455365645 | 0.634306912 |
| 234546_at   | 0.089247714 | 2.798699214 | 0.006935596 | 0.025849858 |
| 234547_at   | -0.01456258 | -0.555312   | 0.580796277 | 0.737086836 |
| 234548_at   | -0.01602464 | -0.79811086 | 0.428030563 | 0.609271128 |
| 234549_at   | 0.032314184 | 1.308987095 | 0.195651636 | 0.356217171 |
| 234550_at   | 0.051479963 | 1.666238239 | 0.10100625  | 0.219262256 |
| 234551_at   | 0.00112605  | 0.032505885 | 0.974179151 | 0.98692088  |
| 234552_at   | -0.013754   | -0.38640166 | 0.700599513 | 0.823069066 |
| 234553_at   | 0.004625034 | 0.127620527 | 0.898886479 | 0.945982552 |
| 234554_at   | 0.021281948 | 0.707278671 | 0.482198273 | 0.657318994 |
| 234555_at   | -0.04255279 | -1.2619036  | 0.211985973 | 0.377032677 |
| 234556_at   | -0.05981869 | -1.55208536 | 0.12602936  | 0.259302948 |
| 234557_at   | -0.08154332 | -2.4114696  | 0.019043459 | 0.059247495 |
| 234558_at   | -0.05155842 | -1.31465938 | 0.193749435 | 0.353748253 |
| 234559_at   | 0.009932796 | 0.329016919 | 0.743316588 | 0.851197689 |
| 234560_at   | 0.157165365 | 3.332381565 | 0.001496084 | 0.007148622 |
| 234561_at   | -0.02096778 | -0.72966727 | 0.468502    | 0.645426817 |
| 234562_x_at | 0.206539655 | 2.926912622 | 0.004867103 | 0.019294002 |
| 234563_at   | 0.079807256 | 2.598581332 | 0.011824045 | 0.039969761 |
| 234564_at   | -0.04723037 | -1.18804207 | 0.239612472 | 0.409481516 |
| 234565_x_at | 0.213995109 | 5.706570502 | 4.02E-07    | 7.60E-06    |
| 234566_at   | -0.07460408 | -1.94555165 | 0.056513271 | 0.140417585 |
| 234567_at   | -0.00834657 | -0.24938004 | 0.803939392 | 0.889634271 |
| 234568_at   | -0.03308767 | -0.793029   | 0.430961949 | 0.611815108 |
| 234569_at   | -0.02366682 | -0.80113689 | 0.426290717 | 0.607596145 |
| 234570_at   | 0.036787425 | 1.084498388 | 0.282588151 | 0.459920963 |

|             |             |             |             |             |
|-------------|-------------|-------------|-------------|-------------|
| 234571_at   | -0.05088712 | -1.40076429 | 0.166560875 | 0.317777529 |
| 234572_at   | -0.03515105 | -1.09552271 | 0.27777242  | 0.45441512  |
| 234573_at   | -0.03503101 | -1.19833273 | 0.235614306 | 0.404629363 |
| 234574_at   | 0.029659827 | 0.907058118 | 0.368093117 | 0.551249569 |
| 234575_at   | 0.04357741  | 1.171552785 | 0.246120864 | 0.417601885 |
| 234576_at   | 0.020006559 | 0.534277768 | 0.595171773 | 0.748078209 |
| 234577_at   | 0.001544255 | 0.046052552 | 0.963425037 | 0.981243759 |
| 234578_at   | 0.123762969 | 3.081591508 | 0.003135806 | 0.013331948 |
| 234579_at   | -0.04988232 | -1.59102223 | 0.116988461 | 0.24497251  |
| 234580_at   | -0.02485669 | -0.8009678  | 0.426387823 | 0.60769579  |
| 234581_at   | 0.028152087 | 0.823053457 | 0.413816407 | 0.596051401 |
| 234582_at   | -0.00923662 | -0.39820213 | 0.691929134 | 0.817049696 |
| 234583_at   | 0.01751906  | 0.581914433 | 0.562857682 | 0.723704235 |
| 234584_s_at | -0.02449017 | -0.63712001 | 0.526529454 | 0.69480496  |
| 234585_at   | 0.001553085 | 0.037503646 | 0.970210978 | 0.984948899 |
| 234586_at   | -0.04086564 | -1.27397003 | 0.207706482 | 0.371580261 |
| 234587_at   | -0.00486127 | -0.09229767 | 0.926776535 | 0.961627554 |
| 234588_at   | 0.179360783 | 3.240399393 | 0.001970071 | 0.008993504 |
| 234589_at   | 0.006383603 | 0.203527026 | 0.839428646 | 0.911439106 |
| 234590_x_at | 0.008833667 | 0.279819153 | 0.780602177 | 0.874637664 |
| 234591_at   | -0.03475914 | -0.95375471 | 0.344127859 | 0.526938783 |
| 234592_at   | -0.00507687 | -0.14524292 | 0.885017792 | 0.938458613 |
| 234593_at   | -0.06362709 | -1.82597347 | 0.072953279 | 0.170954414 |
| 234594_at   | 0.270906997 | 7.064780969 | 2.18E-09    | 1.55E-07    |
| 234595_at   | -0.01695112 | -0.46813209 | 0.641427674 | 0.782152891 |
| 234596_at   | 0.03990674  | 1.621574465 | 0.110266398 | 0.234377716 |
| 234597_at   | -0.03659371 | -0.96624441 | 0.337895055 | 0.520731235 |
| 234598_at   | -0.07511575 | -2.12362966 | 0.037935881 | 0.102523456 |
| 234599_at   | -0.02536459 | -0.66893809 | 0.506163336 | 0.677633388 |
| 234600_at   | -0.02941402 | -0.92662066 | 0.357926396 | 0.540932182 |
| 234601_x_at | -0.01087073 | -0.5412327  | 0.590400123 | 0.744501976 |
| 234602_x_at | -0.01712579 | -0.68769461 | 0.494359747 | 0.667853389 |
| 234603_at   | -0.0561449  | -1.56102943 | 0.123904683 | 0.255740456 |
| 234604_at   | 0.181603082 | 3.147173032 | 0.002592321 | 0.011347308 |
| 234605_at   | 0.319443252 | 3.699933344 | 0.000478072 | 0.002758329 |
| 234606_at   | 0.010771637 | 0.344043536 | 0.732045766 | 0.843665429 |
| 234607_at   | 0.049731852 | 1.577261568 | 0.120122032 | 0.249709003 |
| 234608_at   | 0.000139357 | 0.004433405 | 0.996477733 | 0.998376552 |
| 234609_at   | 0.017398824 | 0.450924724 | 0.653708942 | 0.790079508 |
| 234610_at   | -0.00985176 | -0.26391107 | 0.79277487  | 0.88204074  |
| 234611_at   | -0.02457788 | -0.73802199 | 0.463448123 | 0.641330924 |
| 234612_at   | -0.04421103 | -1.04126485 | 0.302032118 | 0.481673544 |
| 234613_at   | -0.00826585 | -0.26321512 | 0.793308612 | 0.88237728  |
| 234614_at   | 0.020853739 | 0.60456402  | 0.547803847 | 0.711174422 |
| 234615_at   | -0.03923197 | -1.819318   | 0.073975706 | 0.172832989 |
| 234616_at   | 0.007411599 | 0.229255672 | 0.819468936 | 0.899403382 |
| 234617_at   | 0.008065926 | 0.171026847 | 0.864792175 | 0.926774857 |
| 234618_at   | -0.11397236 | -3.01387557 | 0.003807488 | 0.015731187 |
| 234619_at   | -0.09726383 | -1.82680183 | 0.07282686  | 0.170737975 |
| 234620_at   | -0.01711425 | -0.75997636 | 0.450317248 | 0.62977058  |
| 234621_at   | -0.04361226 | -1.67258498 | 0.099743475 | 0.217182652 |
| 234622_at   | -0.09205799 | -2.85089893 | 0.00601115  | 0.02294     |
| 234623_x_at | -0.00818465 | -0.40684458 | 0.685605198 | 0.812264865 |
| 234624_at   | 0.015015639 | 0.414150145 | 0.68027704  | 0.80845986  |
| 234625_at   | -0.0286867  | -0.742981   | 0.460463149 | 0.638961065 |
| 234626_at   | -0.01580275 | -0.39206508 | 0.69643324  | 0.82033145  |
| 234627_at   | -0.01982107 | -0.69158866 | 0.49192826  | 0.665917243 |
| 234628_at   | 0.00399091  | 0.138158916 | 0.890588757 | 0.941457145 |
| 234629_at   | -0.10178665 | -3.01533122 | 0.003791736 | 0.0156777   |
| 234630_at   | 0.01437866  | 0.493751364 | 0.623328458 | 0.768745391 |
| 234631_at   | -0.10406952 | -2.34404929 | 0.022488619 | 0.067699136 |
| 234632_x_at | 0.030640556 | 1.213151103 | 0.229942424 | 0.397854696 |
| 234633_at   | -0.00718061 | -0.26835558 | 0.789368613 | 0.879981592 |
| 234634_at   | -0.09402095 | -2.08745042 | 0.041207723 | 0.109472482 |
| 234635_at   | -0.07471524 | -1.99311825 | 0.05091404  | 0.129301641 |
| 234636_at   | -0.08140173 | -1.67971377 | 0.098340531 | 0.214823103 |
| 234637_at   | 0.028268593 | 0.965434217 | 0.338297103 | 0.521078045 |
| 234638_at   | -0.05703298 | -1.3479591  | 0.182862407 | 0.339729172 |
| 234639_x_at | -0.03928312 | -1.07565762 | 0.28649176  | 0.464461211 |
| 234640_x_at | 0.090474762 | 1.452599587 | 0.151671887 | 0.296588054 |
| 234641_at   | -0.01224999 | -0.5044482  | 0.61583915  | 0.763681557 |
| 234642_at   | -0.0230645  | -0.62618164 | 0.533628812 | 0.700464523 |
| 234643_x_at | 0.094781222 | 4.110274075 | 0.0001247   | 0.000889137 |
| 234644_x_at | 0.012725918 | 0.354819417 | 0.723999426 | 0.838654874 |
| 234645_at   | 0.193352565 | 3.904094248 | 0.00024709  | 0.001578919 |

|             |             |             |             |             |
|-------------|-------------|-------------|-------------|-------------|
| 234646_at   | -0.04770186 | -1.1568605  | 0.252026227 | 0.424879522 |
| 234647_at   | 0.008488565 | 0.316394885 | 0.752827755 | 0.857731557 |
| 234648_s_at | 0.007818973 | 0.20617749  | 0.837367336 | 0.910318149 |
| 234649_at   | 0.203163529 | 4.039294935 | 0.000158097 | 0.001080707 |
| 234650_at   | 0.194588813 | 4.174811876 | 0.000100334 | 0.000738617 |
| 234651_at   | -0.0067796  | -0.2222294  | 0.82490846  | 0.902783851 |
| 234652_at   | 0.050276752 | 1.484520287 | 0.143033559 | 0.284322496 |
| 234653_at   | -0.00580181 | -0.2090273  | 0.835152269 | 0.909017719 |
| 234654_at   | -0.04585977 | -1.26296537 | 0.211606803 | 0.376605219 |
| 234655_at   | -0.01594701 | -0.58752256 | 0.559111282 | 0.720774241 |
| 234656_x_at | 0.002580548 | 0.082695289 | 0.934375821 | 0.965819187 |
| 234657_at   | 0.073995504 | 2.17282393  | 0.033851839 | 0.093763178 |
| 234658_at   | -0.01085731 | -0.30931448 | 0.758180108 | 0.860971049 |
| 234659_at   | 0.030743091 | 0.946760309 | 0.34765099  | 0.530678942 |
| 234660_s_at | -0.15717045 | -3.51261913 | 0.000861896 | 0.004501034 |
| 234661_at   | 0.030775063 | 0.929346207 | 0.356524438 | 0.539675361 |
| 234662_at   | -0.00894762 | -0.45472635 | 0.650987197 | 0.788435105 |
| 234663_at   | 0.01335554  | 0.446047853 | 0.657207432 | 0.792571698 |
| 234664_at   | -0.0333495  | -0.74956265 | 0.456518551 | 0.635469001 |
| 234665_x_at | 0.116892891 | 3.396762914 | 0.001230825 | 0.006066841 |
| 234666_at   | -0.00764166 | -0.20142054 | 0.841067706 | 0.91262013  |
| 234667_at   | -0.06780807 | -1.90028099 | 0.062322327 | 0.151534511 |
| 234668_at   | -0.07636661 | -1.96774554 | 0.053838454 | 0.135176865 |
| 234669_x_at | 0.014189853 | 0.2920732   | 0.771262805 | 0.869031799 |
| 234670_at   | -0.03330386 | -0.88609216 | 0.379191852 | 0.561832287 |
| 234671_at   | -0.13198841 | -3.47860784 | 0.000957573 | 0.004918498 |
| 234672_s_at | 0.041423905 | 1.286442739 | 0.203350805 | 0.366172694 |
| 234673_at   | -0.06007926 | -1.80750635 | 0.075819813 | 0.176110341 |
| 234674_at   | -0.09367012 | -2.43506871 | 0.017954309 | 0.056476208 |
| 234675_x_at | 0.00648045  | 0.10729329  | 0.914923015 | 0.954765438 |
| 234676_s_at | 0.039789222 | 1.708403414 | 0.092856992 | 0.205790176 |
| 234677_at   | 0.033895432 | 0.973516019 | 0.33430074  | 0.517107158 |
| 234678_at   | 0.032314289 | 0.82408157  | 0.413236725 | 0.595465927 |
| 234679_at   | -0.04235355 | -1.27234024 | 0.208280721 | 0.372354174 |
| 234680_at   | -0.00599811 | -0.15647896 | 0.876193666 | 0.933553792 |
| 234681_s_at | -0.02170063 | -0.61630247 | 0.5400831   | 0.705720987 |
| 234682_at   | -0.089625   | -2.45773373 | 0.016961297 | 0.053859957 |
| 234683_at   | -0.06393645 | -2.05769216 | 0.044080004 | 0.115571015 |
| 234684_s_at | -0.09844944 | -2.90409917 | 0.005187263 | 0.020303832 |
| 234685_x_at | -0.00650116 | -0.15203175 | 0.879684417 | 0.935469021 |
| 234686_at   | -0.01724917 | -0.7677503  | 0.445719992 | 0.625848059 |
| 234687_x_at | 0.02807307  | 1.240030789 | 0.219909397 | 0.386830038 |
| 234688_x_at | 0.051010562 | 1.223382409 | 0.226084837 | 0.393587704 |
| 234689_at   | 0.008902313 | 0.219877488 | 0.826731176 | 0.903866865 |
| 234690_at   | -0.07777923 | -1.64402824 | 0.105528443 | 0.226769943 |
| 234691_at   | -0.04025851 | -1.24859643 | 0.216780902 | 0.382924472 |
| 234692_at   | -0.03352928 | -1.26213662 | 0.211902717 | 0.376944603 |
| 234693_at   | -0.04459314 | -1.23796712 | 0.22066807  | 0.387610484 |
| 234694_at   | 0.066641275 | 1.446038321 | 0.153496997 | 0.299123039 |
| 234695_x_at | -0.05353244 | -1.57970457 | 0.119560842 | 0.248785416 |
| 234696_at   | -0.07580032 | -1.36908809 | 0.176199624 | 0.330899291 |
| 234697_x_at | 0.189031131 | 4.643340899 | 1.98E-05    | 0.00018975  |
| 234698_at   | -0.03064916 | -1.04084871 | 0.302223609 | 0.481858568 |
| 234699_at   | -0.02255665 | -0.72893272 | 0.468947828 | 0.645781979 |
| 234700_s_at | 0.038228946 | 1.438912151 | 0.155498599 | 0.301950664 |
| 234701_at   | -0.11012821 | -2.51690911 | 0.014597598 | 0.047484958 |
| 234702_x_at | -0.04342836 | -1.54946254 | 0.126657904 | 0.260149595 |
| 234703_at   | 0.014475949 | 0.475339298 | 0.636313236 | 0.778432321 |
| 234704_at   | -0.06143854 | -1.85649334 | 0.068415465 | 0.162916877 |
| 234705_at   | 0.028760109 | 0.991294624 | 0.325619743 | 0.50780193  |
| 234706_x_at | -0.01820391 | -0.85674728 | 0.395076664 | 0.57769815  |
| 234707_x_at | -0.01614197 | -0.56477084 | 0.574386579 | 0.732135288 |
| 234708_at   | 0.011007021 | 0.291507678 | 0.771693079 | 0.869271324 |
| 234709_at   | 0.012168024 | 0.470282334 | 0.639899958 | 0.781079993 |
| 234710_s_at | -0.24006696 | -4.0788375  | 0.000138552 | 0.000969932 |
| 234711_s_at | 0.064872763 | 1.989223763 | 0.051353851 | 0.130181865 |
| 234712_at   | -0.0098996  | -0.26804311 | 0.789607958 | 0.880182547 |
| 234713_x_at | 0.087710373 | 1.728316891 | 0.08920086  | 0.199647678 |
| 234714_x_at | -0.00046411 | -0.01215659 | 0.990342004 | 0.995408013 |
| 234715_at   | -0.00463679 | -0.10555457 | 0.916296472 | 0.95555166  |
| 234716_at   | 0.048737639 | 1.219456342 | 0.227559473 | 0.395048784 |
| 234717_at   | -0.03835516 | -1.06613493 | 0.29073809  | 0.469102377 |
| 234718_at   | 0.070837318 | 1.749940407 | 0.085366304 | 0.193066689 |
| 234719_at   | -0.03100392 | -0.88301889 | 0.38083632  | 0.563661968 |
| 234720_s_at | 0.049448153 | 1.418160301 | 0.161443212 | 0.310292008 |

|             |             |             |             |             |
|-------------|-------------|-------------|-------------|-------------|
| 234721_s_at | -0.03912371 | -0.98432191 | 0.329006321 | 0.511467688 |
| 234722_x_at | -0.04297762 | -1.21844237 | 0.227941464 | 0.395464282 |
| 234723_x_at | 0.26906081  | 3.066149614 | 0.003278431 | 0.013842197 |
| 234724_x_at | 0.020578762 | 0.654290813 | 0.515485674 | 0.685718538 |
| 234725_s_at | 0.22936008  | 4.989797114 | 5.73E-06    | 6.73E-05    |
| 234726_s_at | -0.09744231 | -1.55801298 | 0.124618018 | 0.256951716 |
| 234727_at   | -0.03572144 | -0.89396898 | 0.37499756  | 0.558162624 |
| 234728_s_at | -0.06372217 | -1.56467764 | 0.123046319 | 0.254379965 |
| 234729_at   | 0.05097873  | 1.723865028 | 0.090007735 | 0.200900249 |
| 234730_s_at | -0.0316291  | -0.96901392 | 0.336523112 | 0.519327988 |
| 234731_at   | 0.074118565 | 2.708402594 | 0.008849373 | 0.031576958 |
| 234732_s_at | 0.113713763 | 2.069868312 | 0.042884439 | 0.113006565 |
| 234733_s_at | -0.13515496 | -3.52122389 | 0.000839172 | 0.004402941 |
| 234734_s_at | 0.201482903 | 5.60546233  | 5.89E-07    | 1.03E-05    |
| 234735_s_at | 0.113496886 | 2.875703792 | 0.005613011 | 0.021670413 |
| 234736_at   | -0.01062999 | -0.30028172 | 0.76502559  | 0.864969734 |
| 234737_at   | 0.033714116 | 0.646807326 | 0.520283637 | 0.689382818 |
| 234738_s_at | 0.005225416 | 0.12284474  | 0.902650634 | 0.948269055 |
| 234739_at   | -0.02733281 | -0.82207711 | 0.41436736  | 0.596595021 |
| 234740_at   | 0.063895793 | 1.845420332 | 0.070033558 | 0.165771929 |
| 234741_at   | -0.03218227 | -1.14256272 | 0.257869656 | 0.431620938 |
| 234742_at   | -0.04401595 | -1.20215056 | 0.23414337  | 0.403005395 |
| 234743_at   | -0.0250981  | -0.86369428 | 0.391279328 | 0.574080159 |
| 234744_x_at | -0.04678112 | -1.89900692 | 0.06249289  | 0.151864076 |
| 234745_at   | -0.04341649 | -1.15786724 | 0.251618377 | 0.424550688 |
| 234746_at   | -0.02730246 | -0.65202097 | 0.516938467 | 0.686547621 |
| 234747_at   | -0.02321126 | -0.91643903 | 0.363195007 | 0.546345044 |
| 234748_x_at | -0.03970104 | -0.86397118 | 0.391128443 | 0.573971839 |
| 234749_s_at | -0.02719416 | -0.83524994 | 0.406971492 | 0.589326051 |
| 234750_at   | -0.01027947 | -0.2992257  | 0.765827139 | 0.865503768 |
| 234751_s_at | -0.10247707 | -3.78865025 | 0.000359654 | 0.002165987 |
| 234752_x_at | -0.02835213 | -1.49967204 | 0.13907106  | 0.278628404 |
| 234753_x_at | 0.08370257  | 2.081851788 | 0.041735348 | 0.110571829 |
| 234754_at   | -0.11458429 | -2.32763567 | 0.023407294 | 0.069993227 |
| 234755_x_at | 0.010979815 | 0.55765466  | 0.579205598 | 0.735902211 |
| 234756_at   | -0.09527027 | -1.45840101 | 0.150072301 | 0.29431003  |
| 234757_at   | -0.10642003 | -2.32412726 | 0.023607941 | 0.070503583 |
| 234758_at   | -0.03507225 | -0.95693327 | 0.342534547 | 0.525492787 |
| 234759_at   | -0.40135042 | -5.02648776 | 5.01E-06    | 6.03E-05    |
| 234760_at   | 0.007619281 | 0.183619298 | 0.854946372 | 0.92068603  |
| 234761_at   | -0.06344303 | -2.0493039  | 0.044920333 | 0.117319983 |
| 234762_x_at | 0.478961972 | 7.863662781 | 9.75E-11    | 2.10E-08    |
| 234763_at   | 0.020229325 | 0.77470161  | 0.441632537 | 0.621965127 |
| 234764_x_at | 0.036772623 | 1.143111966 | 0.257643417 | 0.431355345 |
| 234765_at   | 0.066343874 | 1.434408143 | 0.156774131 | 0.303681929 |
| 234766_at   | -0.06472089 | -2.13374157 | 0.037062926 | 0.100657901 |
| 234767_at   | -0.0724739  | -2.52481649 | 0.014305389 | 0.046673708 |
| 234768_at   | -0.09717607 | -2.85933147 | 0.005872962 | 0.022489455 |
| 234769_at   | 0.039676188 | 0.881192982 | 0.381815465 | 0.564573602 |
| 234770_at   | 0.078308882 | 1.959316235 | 0.054841314 | 0.137178487 |
| 234771_at   | -0.06364931 | -1.71496052 | 0.091639708 | 0.203742381 |
| 234772_s_at | -0.1412106  | -3.14266666 | 0.002626641 | 0.011476178 |
| 234773_x_at | -0.04537543 | -1.39079067 | 0.169550895 | 0.321765063 |
| 234774_at   | 0.003396309 | 0.07791485  | 0.938161376 | 0.967571622 |
| 234775_at   | 0.024717448 | 0.583625901 | 0.561713053 | 0.722949024 |
| 234776_at   | -0.04434822 | -0.94905554 | 0.346492278 | 0.529507023 |
| 234777_at   | -0.03885941 | -1.05590801 | 0.295346593 | 0.474260921 |
| 234778_at   | -0.09575466 | -2.00744163 | 0.049324204 | 0.126138552 |
| 234779_at   | -0.0201359  | -0.81497656 | 0.418387563 | 0.600873324 |
| 234780_at   | 0.144578486 | 3.525974811 | 0.00082687  | 0.004349122 |
| 234781_at   | -0.08210841 | -2.77106501 | 0.007476416 | 0.02748733  |
| 234782_at   | -0.04843395 | -1.03492609 | 0.304957961 | 0.484950295 |
| 234783_at   | 0.006294908 | 0.22084987  | 0.825977469 | 0.903506988 |
| 234784_at   | -0.00475232 | -0.11306277 | 0.910367455 | 0.952725496 |
| 234785_at   | 0.026870473 | 0.56941735  | 0.571250542 | 0.729688157 |
| 234786_at   | -0.09242919 | -3.349153   | 0.001422205 | 0.006856825 |
| 234787_at   | -0.03995874 | -1.37527322 | 0.174284763 | 0.328309153 |
| 234788_x_at | 0.232693817 | 4.830824002 | 1.02E-05    | 0.00010825  |
| 234789_at   | 0.006248175 | 0.262230495 | 0.794063915 | 0.882847862 |
| 234790_at   | -0.01957018 | -0.49952341 | 0.619282176 | 0.766250249 |
| 234791_at   | -0.08457323 | -2.25508816 | 0.027880008 | 0.080263678 |
| 234792_x_at | 0.058187565 | 1.584773441 | 0.118403176 | 0.247205211 |
| 234793_at   | 0.004293887 | 0.156771129 | 0.875964416 | 0.933443054 |
| 234794_at   | -0.01915002 | -0.57591639 | 0.566878263 | 0.726824549 |
| 234795_at   | 0.021629887 | 0.707262151 | 0.482208461 | 0.657318994 |

|             |              |             |             |             |
|-------------|--------------|-------------|-------------|-------------|
| 234796_at   | 0.017934842  | 0.544226069 | 0.588352001 | 0.743060988 |
| 234797_at   | 0.026714784  | 0.76769444  | 0.445752927 | 0.62587156  |
| 234798_x_at | -0.06511855  | -1.7247968  | 0.08983836  | 0.200661783 |
| 234799_at   | 0.068784944  | 1.716901133 | 0.091281979 | 0.203125583 |
| 234800_at   | -0.0605444   | -1.91112706 | 0.060886278 | 0.148760635 |
| 234801_s_at | 0.167686776  | 4.02382847  | 0.000166444 | 0.001127683 |
| 234802_at   | -0.04662318  | -1.41666389 | 0.161878592 | 0.310954957 |
| 234803_at   | -0.05862165  | -1.4318797  | 0.157493744 | 0.30482484  |
| 234804_at   | -0.0936      | -2.9605951  | 0.004427798 | 0.017845354 |
| 234805_at   | 0.001938868  | 0.050915691 | 0.959565961 | 0.979286672 |
| 234806_at   | 0.014509495  | 0.328192029 | 0.743936966 | 0.851726622 |
| 234807_x_at | 0.109565059  | 4.555972403 | 2.70E-05    | 0.000245605 |
| 234808_x_at | 0.001441928  | 0.061196407 | 0.951411152 | 0.975105834 |
| 234809_at   | -0.033711107 | -1.12116671 | 0.266793064 | 0.442060471 |
| 234810_at   | -0.03243532  | -0.73165103 | 0.467299172 | 0.644524723 |
| 234811_at   | 0.026364672  | 0.621145414 | 0.536914094 | 0.70307399  |
| 234812_at   | -0.03552912  | -0.93487084 | 0.353693606 | 0.536797872 |
| 234813_at   | 0.02770305   | 0.910573198 | 0.366252847 | 0.549553473 |
| 234814_at   | -0.00094113  | -0.02911508 | 0.9768718   | 0.988407917 |
| 234815_at   | 0.011605227  | 0.340637013 | 0.734595764 | 0.845493148 |
| 234816_at   | 0.06575322   | 1.889244562 | 0.063812978 | 0.154392031 |
| 234817_at   | -0.07759719  | -2.12115922 | 0.038151859 | 0.102988819 |
| 234818_at   | -0.02590046  | -0.96765671 | 0.33719498  | 0.519957149 |
| 234819_at   | -0.09373465  | -2.28100501 | 0.026202058 | 0.076542414 |
| 234820_at   | -0.03767939  | -0.97848714 | 0.331858147 | 0.514341436 |
| 234821_at   | -0.08434204  | -2.75545973 | 0.007798701 | 0.028480105 |
| 234822_at   | -0.02451005  | -0.79510054 | 0.429765573 | 0.610663895 |
| 234823_at   | -0.02071858  | -0.63660711 | 0.526861233 | 0.694976954 |
| 234824_at   | -0.06164161  | -1.76090634 | 0.08347453  | 0.189594129 |
| 234825_at   | 0.015128713  | 0.617862373 | 0.539061322 | 0.705025622 |
| 234826_at   | -0.04335878  | -1.48513582 | 0.14287087  | 0.284114306 |
| 234827_at   | -0.00107528  | -0.02360696 | 0.981246369 | 0.990577641 |
| 234828_at   | -0.01209658  | -0.3175851  | 0.751929212 | 0.857266523 |
| 234829_at   | -0.03153953  | -0.8234352  | 0.413601111 | 0.595838434 |
| 234830_at   | -0.02831389  | -1.01665282 | 0.313500222 | 0.494597286 |
| 234831_at   | 0.019038689  | 0.572808888 | 0.568966803 | 0.727998636 |
| 234832_at   | 0.007152236  | 0.224525256 | 0.823130114 | 0.901778449 |
| 234833_at   | 0.006101838  | 0.325808547 | 0.745730476 | 0.852880113 |
| 234834_at   | -0.10966932  | -3.14957548 | 0.002574197 | 0.011276809 |
| 234835_at   | -0.04432361  | -1.28314162 | 0.20449692  | 0.367589444 |
| 234836_at   | 0.045516685  | 1.501872657 | 0.138502833 | 0.277870605 |
| 234837_at   | -0.05371332  | -1.33791633 | 0.186095686 | 0.343819281 |
| 234838_at   | 0.071331803  | 1.765093546 | 0.082761427 | 0.18841494  |
| 234839_at   | -0.18224983  | -4.28227778 | 6.96E-05    | 0.000542674 |
| 234840_s_at | -0.0419135   | -0.89238815 | 0.375836963 | 0.558649202 |
| 234841_x_at | 0.016716283  | 0.583861685 | 0.561555452 | 0.722874119 |
| 234842_at   | 0.025863515  | 0.730605082 | 0.46793315  | 0.645008165 |
| 234843_s_at | -0.04173839  | -0.90625309 | 0.368515409 | 0.551716365 |
| 234844_at   | 0.026894709  | 1.091528531 | 0.279510526 | 0.456524666 |
| 234845_at   | -0.02039298  | -0.73410229 | 0.465815309 | 0.64341726  |
| 234846_at   | 0.053117374  | 1.260274679 | 0.212568659 | 0.377746912 |
| 234847_at   | -0.0408796   | -0.91141743 | 0.365811737 | 0.549153813 |
| 234848_at   | -0.05306032  | -1.41662979 | 0.161888524 | 0.31096067  |
| 234849_at   | -0.01407191  | -0.52485397 | 0.601665922 | 0.752914239 |
| 234850_at   | -0.01029142  | -0.33333536 | 0.740071599 | 0.84922232  |
| 234851_at   | -0.07917327  | -1.81645277 | 0.074419553 | 0.173579598 |
| 234852_at   | -0.03055218  | -0.96326754 | 0.339373829 | 0.522235829 |
| 234853_s_at | 0.041882896  | 1.033061041 | 0.305822493 | 0.485887403 |
| 234854_at   | 0.029847473  | 0.973026188 | 0.334542063 | 0.517345023 |
| 234855_at   | -0.0439692   | -1.03080938 | 0.306868453 | 0.487074792 |
| 234856_at   | -0.03582715  | -0.9549806  | 0.343512785 | 0.526390761 |
| 234857_at   | -0.03544699  | -1.18208557 | 0.241949022 | 0.412386472 |
| 234858_at   | -0.08287962  | -2.30951793 | 0.024460009 | 0.072457528 |
| 234859_at   | -0.06290451  | -1.82479403 | 0.073133597 | 0.171277405 |
| 234860_at   | 0.037544962  | 1.40052733  | 0.166631439 | 0.317871448 |
| 234861_at   | -0.01301532  | -0.45467008 | 0.651027442 | 0.788435105 |
| 234862_at   | -0.06437305  | -1.43611219 | 0.156290593 | 0.302974518 |
| 234863_x_at | -0.07677221  | -2.88923219 | 0.005406292 | 0.021006608 |
| 234864_s_at | -0.04032676  | -1.16310293 | 0.249504899 | 0.421950012 |
| 234865_at   | -0.06224789  | -1.68499659 | 0.097311336 | 0.213156803 |
| 234866_s_at | -0.00859028  | -0.35109729 | 0.726775253 | 0.84046279  |
| 234867_at   | 0.010358942  | 0.319013659 | 0.750851191 | 0.856702615 |
| 234868_s_at | 0.066855388  | 1.964005768 | 0.054281432 | 0.136044513 |
| 234869_at   | -0.00857839  | -0.23187994 | 0.817439577 | 0.898006451 |
| 234870_at   | 0.000699407  | 0.017013113 | 0.986483981 | 0.993419155 |



|             |             |             |             |             |
|-------------|-------------|-------------|-------------|-------------|
| 234871_at   | 0.025448358 | 0.51386605  | 0.609279079 | 0.758508784 |
| 234872_at   | -0.0109227  | -0.39501272 | 0.694268527 | 0.818767426 |
| 234873_x_at | -0.08974565 | -2.17933432 | 0.033341326 | 0.092627    |
| 234874_at   | -0.08544594 | -1.99158804 | 0.051086462 | 0.129636888 |
| 234875_at   | -0.02688228 | -0.84548336 | 0.401282066 | 0.583592103 |
| 234876_at   | -0.11231157 | -2.55990102 | 0.013071691 | 0.043402676 |
| 234877_x_at | 0.018203328 | 0.63131918  | 0.530288213 | 0.697561172 |
| 234878_at   | -0.07544087 | -1.86024782 | 0.06787403  | 0.1619209   |
| 234879_at   | 0.095149923 | 2.569640085 | 0.012746778 | 0.04251653  |
| 234880_x_at | 0.023353363 | 0.870897703 | 0.387365921 | 0.569966147 |
| 234881_at   | -0.06013241 | -1.01966305 | 0.312082012 | 0.493090904 |
| 234882_at   | 0.025372829 | 0.609294618 | 0.544685661 | 0.70904962  |
| 234883_x_at | 0.048301884 | 1.497499544 | 0.139633831 | 0.27948028  |
| 234884_x_at | -0.01943043 | -0.6460852  | 0.520747867 | 0.689687582 |
| 234885_at   | 0.035865514 | 0.985918727 | 0.328228703 | 0.510765918 |
| 234886_at   | -0.07074482 | -1.91323408 | 0.06061059  | 0.148192377 |
| 234887_at   | -0.05457191 | -1.31469723 | 0.193736789 | 0.353748253 |
| 234888_at   | 0.029396197 | 0.930278981 | 0.356045458 | 0.539128701 |
| 234889_at   | -0.05155261 | -1.10425822 | 0.273997432 | 0.45021851  |
| 234890_at   | -0.01932539 | -0.67260217 | 0.503845616 | 0.675928086 |
| 234891_at   | 0.077982666 | 2.321640382 | 0.023751093 | 0.070831699 |
| 234892_at   | 0.003921264 | 0.131960797 | 0.895467607 | 0.944051668 |
| 234893_s_at | -0.0359403  | -0.49571049 | 0.621953768 | 0.767711163 |
| 234894_at   | 0.020572578 | 0.529626114 | 0.598373232 | 0.750440513 |
| 234895_at   | 0.006823101 | 0.184115426 | 0.854558921 | 0.920482273 |
| 234896_at   | -0.06789865 | -1.5208581  | 0.133676443 | 0.270684046 |
| 234897_s_at | 0.045846236 | 1.532969168 | 0.130668002 | 0.266220566 |
| 234898_at   | -0.02449288 | -0.65211971 | 0.516875228 | 0.686504433 |
| 234899_at   | -0.01613372 | -0.50149507 | 0.617902712 | 0.765327385 |
| 234900_at   | 0.083014803 | 3.044360976 | 0.003490009 | 0.014612657 |
| 234901_at   | -0.08120654 | -1.76301757 | 0.08311434  | 0.189006568 |
| 234902_s_at | -0.0567253  | -1.24058206 | 0.219707058 | 0.386595843 |
| 234903_at   | -0.0062719  | -0.17388835 | 0.86255287  | 0.925217039 |
| 234904_x_at | -0.03898056 | -1.12829597 | 0.263795837 | 0.438663124 |
| 234905_at   | -0.00111066 | -0.02923405 | 0.976777315 | 0.988343222 |
| 234906_at   | 0.028525782 | 0.627589115 | 0.532712543 | 0.69965878  |
| 234907_x_at | -0.02924816 | -1.24073846 | 0.219649675 | 0.386559498 |
| 234908_s_at | 0.002603749 | 0.079244042 | 0.937108662 | 0.96732401  |
| 234909_at   | -0.02640268 | -0.73893775 | 0.462896072 | 0.640824931 |
| 234910_at   | 0.04396778  | 1.481262333 | 0.143897082 | 0.28560858  |
| 234911_at   | -0.05068635 | -1.54112797 | 0.128671869 | 0.263173454 |
| 234912_at   | -0.0359682  | -0.78182935 | 0.437464288 | 0.617977753 |
| 234913_at   | -0.01253945 | -0.32156373 | 0.748928092 | 0.855185219 |
| 234914_at   | -0.00553672 | -0.16211466 | 0.871773582 | 0.930774862 |
| 234915_s_at | -0.12406194 | -3.36417206 | 0.001358985 | 0.006592398 |
| 234916_at   | -0.03374978 | -0.89252322 | 0.375765194 | 0.55861684  |
| 234917_at   | -0.08245828 | -2.49433757 | 0.015461629 | 0.049878844 |
| 234918_at   | 0.059889627 | 1.054834457 | 0.295833256 | 0.474711603 |
| 234919_s_at | -0.26156291 | -5.44224665 | 1.08E-06    | 1.70E-05    |
| 234920_at   | -0.03635491 | -1.68516128 | 0.097279394 | 0.213139066 |
| 234921_at   | 0.020626908 | 0.745396271 | 0.459013332 | 0.637544961 |
| 234922_s_at | 0.020518015 | 0.702279787 | 0.485286577 | 0.660145726 |
| 234923_at   | 0.153610843 | 3.094737728 | 0.003018977 | 0.012913565 |
| 234924_s_at | 0.021558392 | 0.911438146 | 0.36580092  | 0.549153813 |
| 234925_at   | -0.04102491 | -1.43780119 | 0.155812469 | 0.302343299 |
| 234926_s_at | 0.127421686 | 1.818528827 | 0.074097733 | 0.173018593 |
| 234927_s_at | -0.00931125 | -0.26448299 | 0.792336322 | 0.881750371 |
| 234928_x_at | 0.005517968 | 0.117009374 | 0.907252965 | 0.950801958 |
| 234929_s_at | 0.043983852 | 1.43861879  | 0.155581432 | 0.302041359 |
| 234930_at   | -0.03269303 | -1.01060988 | 0.316360348 | 0.497546423 |
| 234931_at   | -0.02076915 | -0.4675611  | 0.641833615 | 0.782394559 |
| 234932_s_at | -0.0181333  | -0.44353501 | 0.659013076 | 0.793977959 |
| 234933_at   | 0.029402219 | 0.789406982 | 0.433058517 | 0.613908237 |
| 234934_at   | 0.091065797 | 2.150458127 | 0.035658246 | 0.097679335 |
| 234935_at   | -0.02294811 | -0.47516124 | 0.63643938  | 0.778432321 |
| 234936_s_at | 0.214840618 | 3.62857748  | 0.000599542 | 0.003335165 |
| 234937_x_at | -0.03273967 | -1.02053348 | 0.311672738 | 0.492600983 |
| 234938_at   | -0.0460389  | -1.12735902 | 0.26418838  | 0.439024423 |
| 234939_s_at | -0.03044971 | -0.83760672 | 0.405656847 | 0.587936691 |
| 234940_s_at | 0.023635698 | 0.630253819 | 0.53098005  | 0.698121923 |
| 234941_s_at | -0.08808199 | -2.10225675 | 0.039840191 | 0.10654885  |
| 234942_s_at | -0.07874034 | -1.20495023 | 0.233068962 | 0.401740129 |
| 234943_at   | 0.048218433 | 1.217890325 | 0.228149629 | 0.395656483 |
| 234944_s_at | 0.013846204 | 0.527288759 | 0.599984916 | 0.751591386 |
| 234945_at   | -0.0103052  | -0.47064261 | 0.639644143 | 0.780915564 |

|             |             |             |             |             |
|-------------|-------------|-------------|-------------|-------------|
| 234946_at   | -0.01127273 | -0.28529474 | 0.776424873 | 0.871933867 |
| 234947_s_at | -0.19745794 | -2.78798741 | 0.007140807 | 0.026484395 |
| 234948_at   | -0.00919523 | -0.27155463 | 0.786919426 | 0.87841427  |
| 234949_at   | 0.048402669 | 0.823130843 | 0.413772758 | 0.596007738 |
| 234950_s_at | -0.02226063 | -0.6941138  | 0.490355058 | 0.664617961 |
| 234951_s_at | -0.03773747 | -1.14874569 | 0.255330984 | 0.428591637 |
| 234952_s_at | -0.01122399 | -0.29010675 | 0.772759276 | 0.86990649  |
| 234953_x_at | 0.017557543 | 0.436368079 | 0.664174159 | 0.797447097 |
| 234954_at   | -0.0701461  | -2.17845037 | 0.033410242 | 0.092778088 |
| 234955_at   | -0.01470719 | -0.41757884 | 0.677782011 | 0.806754478 |
| 234956_at   | -0.05566714 | -1.69372405 | 0.09563042  | 0.210351152 |
| 234957_at   | -0.07517901 | -2.63208142 | 0.010832095 | 0.037187585 |
| 234958_at   | 0.000875763 | 0.027275785 | 0.9783325   | 0.988954042 |
| 234959_at   | -0.03578768 | -1.05668551 | 0.294994479 | 0.47389983  |
| 234960_at   | 0.026625138 | 0.791647182 | 0.431761085 | 0.612599334 |
| 234961_at   | 0.001835053 | 0.070308222 | 0.944187865 | 0.971199431 |
| 234962_at   | -0.05663273 | -2.22169493 | 0.030181679 | 0.085507014 |
| 234963_s_at | 0.022497417 | 0.21964521  | 0.826911243 | 0.903931055 |
| 234964_at   | 0.050080797 | 1.307107565 | 0.196285024 | 0.357039499 |
| 234965_at   | -0.05847469 | -1.87311485 | 0.066045816 | 0.158507122 |
| 234966_at   | 0.047882517 | 1.324799289 | 0.190383771 | 0.349229662 |
| 234967_at   | 0.018263101 | 0.509857087 | 0.612067656 | 0.760699375 |
| 234968_at   | 0.071458323 | 2.132156255 | 0.037198615 | 0.10095831  |
| 234969_s_at | 0.311778468 | 5.869982678 | 2.17E-07    | 4.60E-06    |
| 234970_at   | 0.045096009 | 0.935285183 | 0.353481883 | 0.53664693  |
| 234971_x_at | 0.026185524 | 0.655364339 | 0.514799331 | 0.685193034 |
| 234972_at   | -0.04543183 | -0.89933512 | 0.372157078 | 0.55541455  |
| 234973_at   | 0.141641953 | 2.122526201 | 0.038032219 | 0.102744577 |
| 234974_at   | 0.178448615 | 4.332172704 | 5.87E-05    | 0.00047058  |
| 234975_at   | -0.33896891 | -3.83398325 | 0.000310567 | 0.001916049 |
| 234976_x_at | 0.077402164 | 1.77801765  | 0.080592258 | 0.184755954 |
| 234977_at   | -0.34157707 | -5.38835632 | 1.32E-06    | 2.01E-05    |
| 234978_at   | -0.14899745 | -3.08394864 | 0.003114552 | 0.013257983 |
| 234979_at   | 0.051664505 | 1.773200418 | 0.081395176 | 0.186157987 |
| 234980_at   | -0.03585255 | -0.72998976 | 0.468306345 | 0.64527888  |
| 234981_x_at | 0.285207808 | 6.387336968 | 3.00E-08    | 9.94E-07    |
| 234982_at   | -0.43373763 | -4.61063896 | 2.23E-05    | 0.000209025 |
| 234983_at   | -0.01270589 | -0.24142721 | 0.810067313 | 0.893352366 |
| 234984_at   | 0.250517629 | 4.507495872 | 3.20E-05    | 0.000282409 |
| 234985_at   | 0.388305285 | 5.074163914 | 4.21E-06    | 5.24E-05    |
| 234986_at   | -0.11143706 | -1.45207083 | 0.151818338 | 0.29683547  |
| 234987_at   | 0.695151372 | 3.742895981 | 0.000416696 | 0.00245524  |
| 234988_at   | -0.04114345 | -1.36535287 | 0.177363783 | 0.332455739 |
| 234989_at   | 0.800909669 | 6.274704568 | 4.62E-08    | 1.38E-06    |
| 234990_at   | -0.01746596 | -0.45297433 | 0.652240949 | 0.789223026 |
| 234991_at   | 0.213857138 | 4.010773598 | 0.000173819 | 0.00117063  |
| 234992_x_at | -0.03447693 | -0.92161557 | 0.360510151 | 0.543706509 |
| 234993_at   | -0.09783732 | -3.2828896  | 0.001735803 | 0.008100295 |
| 234994_at   | 0.196338516 | 3.456742285 | 0.001024322 | 0.005201567 |
| 234995_at   | 0.200414333 | 3.451198122 | 0.001041935 | 0.005274845 |
| 234996_at   | -0.00894286 | -0.37019982 | 0.712569073 | 0.831159585 |
| 234997_x_at | 0.120335201 | 1.937213389 | 0.057547121 | 0.142345359 |
| 234998_at   | -0.37775952 | -3.83861034 | 0.000305935 | 0.001894008 |
| 234999_at   | 0.064378287 | 2.111839022 | 0.038976362 | 0.10468968  |
| 235000_at   | 0.1113085   | 2.52562386  | 0.014275853 | 0.046590948 |
| 235001_at   | 0.018602811 | 0.553445864 | 0.582064894 | 0.737975723 |
| 235002_at   | 0.177726556 | 3.527871418 | 0.000822008 | 0.004327619 |
| 235003_at   | 0.04616672  | 0.646722581 | 0.520338105 | 0.689382818 |
| 235004_at   | -0.34382541 | -5.48540208 | 9.23E-07    | 1.50E-05    |
| 235005_at   | -0.05771052 | -1.03726808 | 0.303874707 | 0.483680048 |
| 235006_at   | -0.18906224 | -4.24118882 | 8.01E-05    | 0.000611334 |
| 235007_at   | -0.4449033  | -4.97293307 | 6.09E-06    | 7.08E-05    |
| 235008_at   | 0.219883877 | 2.43444959  | 0.017982152 | 0.056551851 |
| 235009_at   | 0.099368382 | 2.238175917 | 0.02902556  | 0.082947141 |
| 235010_at   | 0.144128065 | 2.196745571 | 0.032009079 | 0.089712139 |
| 235011_at   | 0.034272247 | 1.273794306 | 0.20776834  | 0.371661169 |
| 235012_at   | 0.018079165 | 0.555488835 | 0.580676132 | 0.737042871 |
| 235013_at   | 0.062719581 | 1.679210889 | 0.098438966 | 0.214984082 |
| 235014_at   | -0.05887026 | -1.07230372 | 0.287982394 | 0.466159549 |
| 235015_at   | 0.148261685 | 1.759482806 | 0.083718125 | 0.190041164 |
| 235016_at   | -0.22552929 | -2.85990497 | 0.005863671 | 0.022467353 |
| 235017_s_at | -0.41363272 | -3.77435511 | 0.000376619 | 0.00225296  |
| 235018_at   | -0.49581742 | -6.70588846 | 8.76E-09    | 4.07E-07    |
| 235019_at   | 0.329244986 | 4.593577999 | 2.36E-05    | 0.000219502 |
| 235020_at   | -0.47166444 | -6.29786579 | 4.23E-08    | 1.29E-06    |

|             |             |             |             |             |
|-------------|-------------|-------------|-------------|-------------|
| 235021_at   | 0.047071302 | 1.313537345 | 0.194124599 | 0.354129416 |
| 235022_at   | -0.04925858 | -0.90197617 | 0.370764118 | 0.554020193 |
| 235023_at   | 0.246688266 | 4.034909172 | 0.000160422 | 0.001093756 |
| 235024_at   | -0.14569612 | -3.70575425 | 0.000469277 | 0.002714591 |
| 235025_at   | -0.04011121 | -1.32587326 | 0.190029896 | 0.348813428 |
| 235026_at   | -0.01578464 | -0.25284047 | 0.801276843 | 0.887809021 |
| 235027_at   | -0.00090003 | -0.01803896 | 0.985669088 | 0.993135604 |
| 235028_at   | 0.122042193 | 1.551031882 | 0.12628152  | 0.259591265 |
| 235029_at   | -0.01303388 | -0.28896638 | 0.773627499 | 0.870340089 |
| 235030_at   | 0.08451575  | 0.835661632 | 0.406741654 | 0.589088665 |
| 235031_at   | 0.102681306 | 2.685321107 | 0.009410796 | 0.033232244 |
| 235032_at   | 0.133782347 | 2.341824295 | 0.02261124  | 0.068004142 |
| 235033_at   | -0.26784125 | -5.4580546  | 1.02E-06    | 1.63E-05    |
| 235034_at   | -0.02862658 | -0.97378116 | 0.334170161 | 0.516987428 |
| 235035_at   | 0.097270721 | 1.743566598 | 0.086482118 | 0.194978501 |
| 235036_at   | -0.03233655 | -0.85660849 | 0.395152763 | 0.577771618 |
| 235037_at   | -0.09180417 | -2.30738023 | 0.024586954 | 0.072741966 |
| 235038_at   | 0.053249477 | 1.621425848 | 0.110298323 | 0.234423275 |
| 235039_x_at | 0.015038248 | 0.718350027 | 0.475397587 | 0.651332586 |
| 235040_at   | -0.21573406 | -5.17109161 | 2.96E-06    | 3.90E-05    |
| 235041_at   | 0.148370092 | 3.820273526 | 0.00032469  | 0.001988902 |
| 235042_at   | -0.0022106  | -0.05799489 | 0.953950122 | 0.976297576 |
| 235043_at   | -0.04914659 | -1.46550864 | 0.148130586 | 0.291641064 |
| 235044_at   | 0.08592894  | 1.441666618 | 0.154722526 | 0.300894615 |
| 235045_at   | 0.104922637 | 3.016892918 | 0.003774904 | 0.015621112 |
| 235046_at   | 0.06408403  | 1.453642178 | 0.151383443 | 0.296218962 |
| 235047_x_at | 0.022821018 | 0.606236006 | 0.546700719 | 0.710472479 |
| 235048_at   | -0.02103432 | -0.40831998 | 0.684527844 | 0.811311085 |
| 235049_at   | -0.56632142 | -4.71418669 | 1.54E-05    | 0.000153656 |
| 235050_at   | -0.08745827 | -3.43846783 | 0.001083473 | 0.005441491 |
| 235051_at   | 0.09711858  | 2.045459942 | 0.045310025 | 0.118123761 |
| 235052_at   | 0.016484889 | 0.755845944 | 0.452771011 | 0.632074728 |
| 235053_at   | -0.12114883 | -2.48905723 | 0.015670308 | 0.050416629 |
| 235054_at   | 0.426313807 | 7.773276475 | 1.39E-10    | 2.61E-08    |
| 235055_x_at | 0.113394506 | 3.82791495  | 0.000316744 | 0.001948776 |
| 235056_at   | -0.07693547 | -1.50130121 | 0.138650211 | 0.278096904 |
| 235057_at   | -0.03766433 | -1.39654968 | 0.167819387 | 0.319496658 |
| 235058_at   | 0.09036097  | 2.085377935 | 0.041402358 | 0.109852422 |
| 235059_at   | 0.170433281 | 2.019345784 | 0.048035583 | 0.123606994 |
| 235060_at   | 0.04456755  | 0.567261625 | 0.572704451 | 0.730855982 |
| 235061_at   | 0.275022941 | 2.62372516  | 0.011072162 | 0.037869216 |
| 235062_at   | 0.043743742 | 0.981587462 | 0.330340785 | 0.51287642  |
| 235063_at   | 0.005948362 | 0.214767449 | 0.830694718 | 0.906227167 |
| 235064_s_at | 0.076651542 | 2.00594692  | 0.04948809  | 0.126492521 |
| 235065_at   | 0.153810416 | 2.667197868 | 0.009874251 | 0.034535922 |
| 235066_at   | -1.03655516 | -5.6038985  | 5.92E-07    | 1.04E-05    |
| 235067_at   | 0.356577859 | 3.290919195 | 0.001694593 | 0.007931171 |
| 235068_at   | -0.10568841 | -2.55030662 | 0.013399106 | 0.044302201 |
| 235069_at   | -0.13085009 | -3.17471985 | 0.002391505 | 0.010587272 |
| 235070_at   | -1.1329352  | -7.80384893 | 1.23E-10    | 2.37E-08    |
| 235071_at   | 0.018242456 | 0.341813756 | 0.733714555 | 0.84485644  |
| 235072_s_at | 0.501216701 | 7.160790993 | 1.50E-09    | 1.20E-07    |
| 235073_at   | -0.07872772 | -1.81312841 | 0.074937318 | 0.174526597 |
| 235074_at   | -0.38055101 | -4.82368904 | 1.04E-05    | 0.000110529 |
| 235075_at   | -0.06477089 | -2.10309369 | 0.039764084 | 0.106402614 |
| 235076_at   | 0.313912558 | 6.957310516 | 3.31E-09    | 2.07E-07    |
| 235077_at   | -0.75811166 | -4.99061713 | 5.71E-06    | 6.72E-05    |
| 235078_at   | -0.05344864 | -1.0082769  | 0.317469232 | 0.49883398  |
| 235079_at   | 0.162341139 | 2.857025292 | 0.00591046  | 0.02261367  |
| 235080_at   | 0.005858473 | 0.140169244 | 0.88900723  | 0.940546626 |
| 235081_x_at | 0.072328717 | 2.146630698 | 0.035975685 | 0.098374041 |
| 235082_at   | -0.19531607 | -3.15577748 | 0.002527956 | 0.011103628 |
| 235083_at   | -0.31102357 | -5.98751548 | 1.39E-07    | 3.26E-06    |
| 235084_x_at | 0.220813106 | 5.335250632 | 1.61E-06    | 2.38E-05    |
| 235085_at   | -0.49970713 | -6.89770517 | 4.17E-09    | 2.43E-07    |
| 235086_at   | -0.02745818 | -0.88190718 | 0.381432289 | 0.56418904  |
| 235087_at   | 0.019577867 | 0.554548703 | 0.581315013 | 0.737401526 |
| 235088_at   | -0.0530419  | -1.5058798  | 0.137472852 | 0.276330697 |
| 235089_at   | 0.020791402 | 0.55551659  | 0.580657276 | 0.737042871 |
| 235090_at   | 0.031590338 | 0.894032684 | 0.37496376  | 0.558130903 |
| 235091_at   | -0.03953292 | -0.86674927 | 0.389616642 | 0.572542892 |
| 235092_at   | 0.011113488 | 0.497294574 | 0.620843226 | 0.767227748 |
| 235093_at   | 0.111406846 | 2.115396158 | 0.038659869 | 0.104020883 |
| 235094_at   | 0.169152706 | 2.458900086 | 0.01691156  | 0.053717941 |
| 235095_at   | -0.04716497 | -1.13417113 | 0.261343818 | 0.435659689 |

|             |             |             |             |             |
|-------------|-------------|-------------|-------------|-------------|
| 235096_at   | -0.16733455 | -3.63650583 | 0.000584714 | 0.003268957 |
| 235097_at   | -0.00761362 | -0.30403455 | 0.762179184 | 0.863127128 |
| 235098_at   | 0.023157764 | 0.551931759 | 0.583095171 | 0.738841807 |
| 235099_at   | 0.08795968  | 2.110562922 | 0.039090451 | 0.104883594 |
| 235100_at   | -0.02738901 | -0.82045582 | 0.415283237 | 0.597517748 |
| 235101_at   | 0.038213118 | 0.756762161 | 0.452226044 | 0.631570462 |
| 235102_x_at | 0.107948922 | 1.397374645 | 0.167572472 | 0.319162536 |
| 235103_at   | 0.368070428 | 2.602947887 | 0.011690226 | 0.039607275 |
| 235104_at   | -0.02026819 | -0.60711608 | 0.546120525 | 0.710152129 |
| 235105_at   | 0.003010157 | 0.096640703 | 0.923341681 | 0.959875267 |
| 235106_at   | 0.024840685 | 0.726614665 | 0.470356337 | 0.647037287 |
| 235107_at   | -0.06713284 | -1.65293864 | 0.103694775 | 0.223794036 |
| 235108_at   | -0.05428921 | -1.51628508 | 0.134826599 | 0.272395929 |
| 235109_at   | 0.224487955 | 3.141571233 | 0.002635047 | 0.011509533 |
| 235110_at   | 0.237612519 | 5.974853251 | 1.46E-07    | 3.37E-06    |
| 235111_at   | -0.22230197 | -3.02121568 | 0.003728676 | 0.01545414  |
| 235112_at   | 0.393108781 | 5.203748963 | 2.62E-06    | 3.54E-05    |
| 235113_at   | 0.087868163 | 2.171633622 | 0.033945915 | 0.093973665 |
| 235114_x_at | 0.045126491 | 1.089189493 | 0.280531895 | 0.457707778 |
| 235115_at   | -0.27671524 | -3.96899336 | 0.000199599 | 0.001314543 |
| 235116_at   | 0.222405907 | 5.325822306 | 1.67E-06    | 2.45E-05    |
| 235117_at   | -0.00773294 | -0.17455763 | 0.862029279 | 0.924888823 |
| 235118_at   | -0.24581399 | -3.14143554 | 0.002636091 | 0.011512964 |
| 235119_at   | 0.166174902 | 4.463009868 | 3.73E-05    | 0.000323116 |
| 235120_at   | -0.00778964 | -0.26336353 | 0.793194781 | 0.882339559 |
| 235121_at   | -0.21296185 | -4.18716868 | 9.62E-05    | 0.000712958 |
| 235122_at   | 0.067883729 | 1.044720006 | 0.300445382 | 0.479839762 |
| 235123_at   | 0.454473829 | 4.103130773 | 0.000127725 | 0.000907619 |
| 235124_at   | -0.07510773 | -1.66285665 | 0.101684382 | 0.220503117 |
| 235125_x_at | -0.14245739 | -2.08391749 | 0.041539994 | 0.110165286 |
| 235126_at   | 0.022163566 | 0.501142722 | 0.618149128 | 0.765505302 |
| 235127_at   | 0.582136898 | 5.505217777 | 8.57E-07    | 1.41E-05    |
| 235128_at   | -0.48213127 | -6.76660064 | 6.93E-09    | 3.46E-07    |
| 235129_at   | -0.7596856  | -8.34709969 | 1.50E-11    | 6.76E-09    |
| 235130_at   | -0.0449519  | -1.15183913 | 0.254067555 | 0.427208969 |
| 235131_at   | -0.02283082 | -0.562766   | 0.575742269 | 0.73312079  |
| 235132_at   | 0.516414717 | 5.918380445 | 1.80E-07    | 3.98E-06    |
| 235133_at   | 0.153927008 | 2.586845775 | 0.01219063  | 0.041010436 |
| 235134_at   | -0.17997051 | -2.71628344 | 0.008664824 | 0.031051905 |
| 235135_at   | -0.0635572  | -2.30675631 | 0.024624114 | 0.072826796 |
| 235136_at   | 0.021446642 | 0.35799123  | 0.721636935 | 0.837285441 |
| 235137_at   | -0.07929724 | -1.70572731 | 0.093357604 | 0.206643457 |
| 235138_at   | 0.463937178 | 6.532451781 | 1.71E-08    | 6.60E-07    |
| 235139_at   | 0.021912431 | 0.603645458 | 0.548410368 | 0.711687247 |
| 235140_at   | -0.00047328 | -0.01387804 | 0.988974453 | 0.994873529 |
| 235141_at   | 0.150977971 | 4.378587266 | 5.00E-05    | 0.000411924 |
| 235142_at   | -0.16175439 | -2.89484309 | 0.005322642 | 0.020753752 |
| 235143_at   | 0.01892968  | 0.704161196 | 0.484122957 | 0.659053714 |
| 235144_at   | -0.00413636 | -0.11813285 | 0.906366629 | 0.950319277 |
| 235145_at   | -0.00573599 | -0.15363489 | 0.878425786 | 0.934828889 |
| 235146_at   | 0.482526879 | 3.703503672 | 0.000472659 | 0.002730974 |
| 235147_at   | 0.178927746 | 2.787030356 | 0.007159411 | 0.026533802 |
| 235148_at   | -0.00476608 | -0.15759096 | 0.875321205 | 0.93304685  |
| 235149_at   | -0.06991904 | -1.62455967 | 0.109626726 | 0.233351002 |
| 235150_at   | -0.52135276 | -6.16404403 | 7.07E-08    | 1.93E-06    |
| 235151_at   | 0.16650711  | 3.031093696 | 0.003625014 | 0.015074822 |
| 235152_at   | 0.257400861 | 6.119175723 | 8.39E-08    | 2.20E-06    |
| 235153_at   | 0.105473041 | 2.769349743 | 0.007511231 | 0.027592631 |
| 235154_at   | 0.057856087 | 1.40962766  | 0.163937973 | 0.314006595 |
| 235155_at   | 0.445272525 | 4.4498754   | 3.91E-05    | 0.00033578  |
| 235156_at   | 0.035705174 | 1.331306794 | 0.188247166 | 0.346433697 |
| 235157_at   | 0.045165439 | 1.149531632 | 0.255009563 | 0.428261213 |
| 235158_at   | 0.112519479 | 1.676792077 | 0.098913553 | 0.215735908 |
| 235159_at   | 0.102108567 | 2.638962633 | 0.010637978 | 0.036645021 |
| 235160_at   | -0.0177676  | -0.49002183 | 0.625949138 | 0.770892526 |
| 235161_at   | 0.031914511 | 0.817636024 | 0.416879072 | 0.599207522 |
| 235162_at   | -0.02953822 | -0.83669975 | 0.406162459 | 0.588478656 |
| 235163_at   | -0.06798045 | -2.24441008 | 0.02859854  | 0.081962675 |
| 235164_at   | -0.13600064 | -2.29520627 | 0.025321109 | 0.074445827 |
| 235165_at   | 0.157504511 | 2.401321879 | 0.019529747 | 0.060432284 |
| 235166_at   | -0.12655076 | -3.27781384 | 0.001762339 | 0.008200153 |
| 235167_at   | -0.08250762 | -0.80199089 | 0.425800467 | 0.607266371 |
| 235168_at   | 0.12505564  | 2.474378221 | 0.01626384  | 0.051996023 |
| 235169_at   | -0.08251899 | -2.17367373 | 0.033784815 | 0.093620472 |
| 235170_at   | 0.084411639 | 1.900562984 | 0.06228463  | 0.151498023 |

|             |             |             |             |             |
|-------------|-------------|-------------|-------------|-------------|
| 235171_at   | 0.027565855 | 0.496601316 | 0.621329134 | 0.767444426 |
| 235172_at   | 0.083721157 | 1.475888493 | 0.145330377 | 0.287572177 |
| 235173_at   | -0.03627157 | -1.10377993 | 0.274203188 | 0.45044067  |
| 235174_s_at | -0.25776982 | -2.4319815  | 0.018093535 | 0.056826162 |
| 235175_at   | 0.030419861 | 0.910338666 | 0.366375449 | 0.549557026 |
| 235176_at   | 0.001865345 | 0.06221831  | 0.950600836 | 0.974686323 |
| 235177_at   | -0.02944261 | -0.75374374 | 0.454022841 | 0.633308015 |
| 235178_x_at | -0.02129998 | -1.01895794 | 0.312413821 | 0.493357727 |
| 235179_at   | 0.071288773 | 2.001353411 | 0.049994676 | 0.12743752  |
| 235180_at   | 0.004504519 | 0.218596544 | 0.827724305 | 0.904419762 |
| 235181_at   | -0.0605852  | -2.26317233 | 0.027346687 | 0.079028654 |
| 235182_at   | -0.02615827 | -0.86493305 | 0.390604596 | 0.573429051 |
| 235183_at   | -0.20049818 | -4.22341646 | 8.51E-05    | 0.000642952 |
| 235184_at   | 0.036650365 | 1.232805381 | 0.222574125 | 0.389655191 |
| 235185_s_at | -0.04943664 | -1.51365897 | 0.135490628 | 0.273416135 |
| 235186_at   | -0.01629282 | -0.25750505 | 0.797691544 | 0.885351044 |
| 235187_s_at | 0.035867641 | 0.791261464 | 0.431984313 | 0.612838234 |
| 235188_at   | 0.019802633 | 0.499896912 | 0.619020748 | 0.766075244 |
| 235189_at   | 0.035766936 | 1.007433425 | 0.317870786 | 0.499131515 |
| 235190_at   | 0.489876094 | 4.24296837  | 7.96E-05    | 0.000608681 |
| 235191_at   | -0.11874441 | -2.81370296 | 0.006657288 | 0.024968739 |
| 235192_at   | 0.023592671 | 0.671051063 | 0.504826068 | 0.676752041 |
| 235193_at   | 0.082051914 | 1.135799257 | 0.260667183 | 0.434966489 |
| 235194_at   | -0.03450766 | -0.98813968 | 0.327149176 | 0.509410399 |
| 235195_at   | -0.09698778 | -1.86651555 | 0.066978213 | 0.160281191 |
| 235196_at   | 0.109635506 | 1.882305179 | 0.064765637 | 0.156164331 |
| 235197_s_at | -0.08335258 | -2.30461779 | 0.024751864 | 0.073128202 |
| 235198_at   | -0.05005006 | -0.99673362 | 0.322994275 | 0.504976567 |
| 235199_at   | 0.113433984 | 1.843796962 | 0.070273467 | 0.166154999 |
| 235200_at   | 0.264192649 | 6.216828554 | 5.77E-08    | 1.65E-06    |
| 235201_at   | -0.39900839 | -6.40027693 | 2.85E-08    | 9.57E-07    |
| 235202_x_at | 0.032419389 | 1.238779998 | 0.220369    | 0.387333596 |
| 235203_at   | -0.00466462 | -0.18161923 | 0.856508683 | 0.921543793 |
| 235204_at   | -0.03513499 | -1.41368144 | 0.162749044 | 0.312211026 |
| 235205_at   | -0.03137843 | -0.73469309 | 0.465458077 | 0.643181319 |
| 235206_at   | 0.002344191 | 0.060834001 | 0.951698534 | 0.975199149 |
| 235207_at   | -0.04812899 | -1.10702959 | 0.272807355 | 0.448865715 |
| 235208_at   | -0.0430718  | -1.42886062 | 0.158356352 | 0.305992123 |
| 235209_at   | -0.04026046 | -1.1124329  | 0.270497507 | 0.4461901   |
| 235210_s_at | 0.017068815 | 0.542924706 | 0.589242005 | 0.743741631 |
| 235211_at   | -0.0207155  | -0.55379339 | 0.581828541 | 0.737843515 |
| 235212_at   | -0.00204595 | -0.04916481 | 0.960955239 | 0.980144956 |
| 235213_at   | 0.960840277 | 7.315499359 | 8.21E-10    | 8.31E-08    |
| 235214_at   | -0.01029023 | -0.29745628 | 0.767170749 | 0.866496376 |
| 235215_at   | 0.113095733 | 2.357908002 | 0.02173812  | 0.065892572 |
| 235216_at   | -0.00264972 | -0.09151035 | 0.927399369 | 0.962034506 |
| 235217_at   | 0.200837904 | 4.036736907 | 0.000159449 | 0.001088451 |
| 235218_x_at | -0.0567191  | -1.81311884 | 0.074938812 | 0.174526597 |
| 235219_at   | 0.009903788 | 0.252227557 | 0.801748266 | 0.888177218 |
| 235220_at   | -0.00550336 | -0.17392614 | 0.862523301 | 0.925208606 |
| 235221_at   | 0.071165674 | 2.07416381  | 0.042469429 | 0.112153781 |
| 235222_x_at | 0.106943397 | 1.555098643 | 0.125310322 | 0.25805635  |
| 235223_at   | 0.040765898 | 1.055043245 | 0.295738565 | 0.474668627 |
| 235224_s_at | -0.12135328 | -2.32055314 | 0.02381392  | 0.07098008  |
| 235225_at   | -1.05228773 | -6.81120301 | 5.83E-09    | 3.07E-07    |
| 235226_at   | 0.331432771 | 3.858180883 | 0.000287067 | 0.001794101 |
| 235227_at   | -0.40875864 | -5.27237464 | 2.04E-06    | 2.88E-05    |
| 235228_at   | -0.03712792 | -0.4784292  | 0.634125969 | 0.776905109 |
| 235229_at   | -0.00219809 | -0.06283859 | 0.950109009 | 0.974419345 |
| 235230_at   | -0.49236422 | -6.01709196 | 1.24E-07    | 2.99E-06    |
| 235231_at   | 0.031476565 | 0.696956804 | 0.48858715  | 0.663005788 |
| 235232_at   | 0.083073588 | 3.237011853 | 0.001989976 | 0.009076956 |
| 235233_s_at | 0.013654394 | 0.399644127 | 0.690872432 | 0.816146932 |
| 235234_at   | -0.05347745 | -1.36994713 | 0.175932716 | 0.330559226 |
| 235235_s_at | -0.00044467 | -0.0194679  | 0.984534014 | 0.992528044 |
| 235236_at   | 0.12760583  | 1.608720482 | 0.113055388 | 0.238693848 |
| 235237_at   | -0.00417694 | -0.13584839 | 0.892407004 | 0.942370531 |
| 235238_at   | 0.376114959 | 5.057145826 | 4.48E-06    | 5.52E-05    |
| 235239_at   | -0.0375877  | -1.19257584 | 0.237844987 | 0.407270811 |
| 235240_at   | -0.05292395 | -1.41382138 | 0.16270812  | 0.312172718 |
| 235241_at   | -0.06767692 | -1.40799422 | 0.164418935 | 0.314698546 |
| 235242_at   | 0.141892592 | 2.51377363  | 0.014714953 | 0.047804793 |
| 235243_at   | -0.45343946 | -5.48990194 | 9.08E-07    | 1.48E-05    |
| 235244_at   | 0.092317975 | 2.155700793 | 0.03522741  | 0.096730364 |
| 235245_at   | 0.018848303 | 0.67192327  | 0.50427462  | 0.676219434 |

|             |             |             |             |             |
|-------------|-------------|-------------|-------------|-------------|
| 235246_at   | 0.059370597 | 1.504466863 | 0.137835334 | 0.276797877 |
| 235247_at   | 0.063137944 | 1.714091261 | 0.09180032  | 0.204025059 |
| 235248_at   | -0.23323983 | -5.75343241 | 3.37E-07    | 6.59E-06    |
| 235249_at   | 0.004800688 | 0.17206259  | 0.863981511 | 0.926255993 |
| 235250_at   | -0.10110421 | -2.32885156 | 0.023338111 | 0.069814382 |
| 235251_at   | -0.46592023 | -5.88526735 | 2.05E-07    | 4.40E-06    |
| 235252_at   | 0.315888437 | 5.626291623 | 5.44E-07    | 9.70E-06    |
| 235253_at   | -0.28980135 | -4.40281841 | 4.60E-05    | 0.000383784 |
| 235254_at   | -0.00585816 | -0.13712191 | 0.891404748 | 0.941856849 |
| 235255_at   | -0.0212466  | -0.67315906 | 0.503493859 | 0.675642959 |
| 235256_s_at | 0.071391883 | 2.380496479 | 0.020562708 | 0.062956706 |
| 235257_at   | 0.006065263 | 0.189248696 | 0.850552235 | 0.918008126 |
| 235258_at   | -0.0507698  | -1.59396361 | 0.116327265 | 0.243896515 |
| 235259_at   | 0.27407079  | 4.87815675  | 8.58E-06    | 9.39E-05    |
| 235260_s_at | -0.05323243 | -0.79080051 | 0.43225117  | 0.613119503 |
| 235261_at   | -0.0460261  | -1.35118599 | 0.181832626 | 0.338449848 |
| 235262_at   | -0.08012042 | -2.06325975 | 0.043529792 | 0.11443053  |
| 235263_at   | 0.027133043 | 0.744602752 | 0.45948937  | 0.638025816 |
| 235264_at   | -0.04453627 | -1.28377117 | 0.204277974 | 0.367314069 |
| 235265_at   | -0.03656332 | -1.29755412 | 0.199528303 | 0.361127402 |
| 235266_at   | 0.025879352 | 0.780275617 | 0.438370915 | 0.618834231 |
| 235267_at   | 0.076310139 | 1.841464207 | 0.070619423 | 0.166717196 |
| 235268_at   | -0.080746   | -2.53134143 | 0.014068264 | 0.046061453 |
| 235269_at   | 0.009616466 | 0.284624652 | 0.77693573  | 0.872147581 |
| 235270_at   | -0.0288811  | -0.81171096 | 0.42024437  | 0.602275271 |
| 235271_s_at | 0.029312493 | 0.726482095 | 0.470436962 | 0.647066683 |
| 235272_at   | -0.1221787  | -3.30440404 | 0.001627454 | 0.00767562  |
| 235273_at   | 0.100733143 | 0.962768779 | 0.339622005 | 0.52247381  |
| 235274_at   | 0.077285067 | 0.694162141 | 0.490324968 | 0.664617961 |
| 235275_at   | 0.068518833 | 1.65238207  | 0.103808546 | 0.22401794  |
| 235276_at   | 0.010881531 | 0.271501077 | 0.78696041  | 0.87841427  |
| 235277_at   | 0.073482225 | 1.993562493 | 0.050864077 | 0.129204123 |
| 235278_at   | -1.02114168 | -6.8435702  | 5.14E-09    | 2.83E-07    |
| 235279_at   | 0.098737216 | 2.672280139 | 0.009742224 | 0.0341731   |
| 235280_at   | -0.00600492 | -0.12763344 | 0.898876305 | 0.945982552 |
| 235281_x_at | 0.064952746 | 1.232863561 | 0.222552574 | 0.389655191 |
| 235282_at   | 0.025647498 | 0.504550379 | 0.615767806 | 0.763681557 |
| 235283_at   | -0.10299826 | -2.95194035 | 0.004537018 | 0.018218726 |
| 235284_s_at | -0.01965426 | -0.53473058 | 0.594860561 | 0.747813085 |
| 235285_at   | -0.07366065 | -2.53585541 | 0.013906307 | 0.045634824 |
| 235286_at   | 0.034388427 | 0.961262423 | 0.340372273 | 0.52326778  |
| 235287_at   | -0.04958745 | -1.19843632 | 0.235574305 | 0.404576215 |
| 235288_at   | 0.019559197 | 0.469415147 | 0.640515894 | 0.781531515 |
| 235289_at   | -0.07313935 | -1.96529748 | 0.054128077 | 0.135766753 |
| 235290_at   | -0.04858374 | -1.87847493 | 0.065296603 | 0.15719008  |
| 235291_s_at | 0.070827198 | 1.807062906 | 0.075889789 | 0.176228011 |
| 235292_at   | 0.085653714 | 2.019875998 | 0.047978869 | 0.123492593 |
| 235293_at   | 0.321563373 | 5.567610033 | 6.79E-07    | 1.16E-05    |
| 235294_at   | -0.02223381 | -0.85948878 | 0.393575397 | 0.57634441  |
| 235295_at   | -0.31222227 | -5.357772   | 1.48E-06    | 2.21E-05    |
| 235296_at   | -0.47040437 | -6.77867676 | 6.61E-09    | 3.37E-07    |
| 235297_at   | -0.06345337 | -2.27913623 | 0.026319985 | 0.076786525 |
| 235298_at   | 0.105772446 | 3.562323738 | 0.000738273 | 0.003969909 |
| 235299_at   | -0.16543328 | -4.95423988 | 6.52E-06    | 7.51E-05    |
| 235300_x_at | -0.15462363 | -3.72404031 | 0.000442642 | 0.002581571 |
| 235301_at   | -0.03807244 | -0.7622492  | 0.448970323 | 0.628417841 |
| 235302_at   | -0.23949867 | -4.59642641 | 2.34E-05    | 0.000217752 |
| 235303_at   | 0.016760937 | 0.554311087 | 0.581476542 | 0.737564557 |
| 235304_at   | -0.01493323 | -0.46477309 | 0.643817312 | 0.783624517 |
| 235305_s_at | 0.31228242  | 4.604680592 | 2.27E-05    | 0.000212664 |
| 235306_at   | 0.185346784 | 2.972371871 | 0.004283101 | 0.017363963 |
| 235307_at   | -0.05256734 | -1.27930858 | 0.205833747 | 0.369234351 |
| 235308_at   | 0.608991799 | 8.494549    | 8.48E-12    | 5.15E-09    |
| 235309_at   | -0.09641703 | -2.08288235 | 0.041637788 | 0.110372243 |
| 235310_at   | -0.04994969 | -1.29337669 | 0.200959047 | 0.363084643 |
| 235311_at   | 0.016857141 | 0.685485159 | 0.495742278 | 0.668831549 |
| 235312_s_at | -0.04872463 | -1.69749226 | 0.094912065 | 0.209181549 |
| 235313_at   | -0.05916673 | -1.71455346 | 0.091714891 | 0.203865609 |
| 235314_at   | 0.048314104 | 1.187018401 | 0.240012862 | 0.409930631 |
| 235315_at   | -0.06479752 | -1.35971721 | 0.17913136  | 0.33487007  |
| 235316_at   | -0.21693197 | -3.896983   | 0.000252911 | 0.001608295 |
| 235317_at   | 0.027618955 | 0.874967836 | 0.385165599 | 0.567775609 |
| 235318_at   | 0.010696901 | 0.342722753 | 0.733034097 | 0.844284201 |
| 235319_at   | 1.07E-05    | 0.000327599 | 0.999739727 | 0.999822772 |
| 235320_at   | -0.70599114 | -7.22092472 | 1.19E-09    | 1.06E-07    |

|             |             |             |             |              |
|-------------|-------------|-------------|-------------|--------------|
| 235321_at   | -0.08283307 | -2.30977117 | 0.024445009 | 0.072434879  |
| 235322_at   | -0.1237959  | -3.4397924  | 0.001079079 | 0.005425988  |
| 235323_at   | -0.08057174 | -2.0434004  | 0.045520017 | 0.118539831  |
| 235324_at   | 0.042012499 | 1.096772318 | 0.277230197 | 0.453845127  |
| 235325_at   | 0.00146898  | 0.040844324 | 0.967558927 | 0.983468294  |
| 235326_at   | -0.02431409 | -0.74565038 | 0.458860951 | 0.6374449891 |
| 235327_x_at | 0.286721835 | 5.809865693 | 2.72E-07    | 5.51E-06     |
| 235328_at   | 0.095121123 | 2.838591555 | 0.006218236 | 0.023603314  |
| 235329_at   | 0.039199863 | 0.958061632 | 0.3419701   | 0.524965744  |
| 235330_at   | -0.00846653 | -0.23511311 | 0.814941078 | 0.896371005  |
| 235331_x_at | 0.112879335 | 1.436101266 | 0.156293688 | 0.302974518  |
| 235332_at   | 0.039895986 | 1.370389539 | 0.175795376 | 0.330416643  |
| 235333_at   | -0.74446046 | -7.21651209 | 1.21E-09    | 1.07E-07     |
| 235334_at   | 0.196197706 | 3.58210413  | 0.000693937 | 0.003768929  |
| 235335_at   | -0.01800663 | -0.49493511 | 0.622497679 | 0.768102326  |
| 235336_at   | -0.04510899 | -1.08113266 | 0.284069894 | 0.461545725  |
| 235337_at   | -0.18195962 | -4.90332429 | 7.83E-06    | 8.72E-05     |
| 235338_s_at | 0.106253037 | 3.764649051 | 0.000388572 | 0.002313935  |
| 235339_at   | 0.086808725 | 2.418982137 | 0.018690476 | 0.058303534  |
| 235340_at   | -0.02223277 | -0.62893331 | 0.531838227 | 0.698921255  |
| 235341_at   | 0.006133621 | 0.126835291 | 0.899505224 | 0.946244733  |
| 235342_at   | -0.52149848 | -3.82898798 | 0.000315643 | 0.001942539  |
| 235343_at   | -0.0852482  | -2.89027881 | 0.005390597 | 0.020956554  |
| 235344_at   | -0.17343979 | -3.52832458 | 0.00082085  | 0.004322542  |
| 235345_at   | -0.06676572 | -1.53331708 | 0.130582382 | 0.266094466  |
| 235346_at   | -0.38221694 | -4.12213842 | 0.000119829 | 0.000859061  |
| 235347_at   | 0.176830326 | 3.18874823  | 0.002294941 | 0.010227913  |
| 235348_at   | -0.06546314 | -1.53178097 | 0.130960751 | 0.266683278  |
| 235349_at   | -0.15045961 | -4.0778495  | 0.000139011 | 0.00097225   |
| 235350_at   | 0.012299126 | 0.222373522 | 0.824796794 | 0.902758253  |
| 235351_at   | -0.01751384 | -0.56126762 | 0.576756496 | 0.733973101  |
| 235352_at   | 0.02523793  | 0.414007137 | 0.680381184 | 0.808540627  |
| 235353_at   | -0.07774371 | -1.86661113 | 0.066964629 | 0.160264711  |
| 235354_s_at | -0.08363309 | -3.0022806  | 0.003935154 | 0.016177895  |
| 235355_at   | -0.71868454 | -5.7942736  | 2.89E-07    | 5.79E-06     |
| 235356_at   | 0.007771888 | 0.280705827 | 0.779925293 | 0.874164147  |
| 235357_at   | -0.05540414 | -1.2677149  | 0.209916842 | 0.374519843  |
| 235358_at   | -0.03206851 | -0.91318407 | 0.364889778 | 0.548248578  |
| 235359_at   | 0.054723591 | 1.338787692 | 0.185813445 | 0.343496628  |
| 235360_at   | -0.10664019 | -1.63511152 | 0.107389742 | 0.229793276  |
| 235361_at   | 0.038806682 | 1.042691758 | 0.301376137 | 0.480919138  |
| 235362_at   | 0.060871674 | 1.358931816 | 0.179378755 | 0.335164317  |
| 235363_at   | 0.068560626 | 2.021221283 | 0.047835229 | 0.123176542  |
| 235364_at   | -0.02357494 | -0.64997162 | 0.518252002 | 0.687781164  |
| 235365_at   | 0.127066592 | 2.529618646 | 0.014130524 | 0.046224665  |
| 235366_at   | -0.07417043 | -2.20111339 | 0.031682302 | 0.088952471  |
| 235367_at   | -0.00879049 | -0.36797881 | 0.714215663 | 0.832304931  |
| 235368_at   | -0.01793926 | -0.65958929 | 0.512102908 | 0.682885369  |
| 235369_at   | 0.122506946 | 3.425054171 | 0.001128937 | 0.005632334  |
| 235370_at   | -0.11252974 | -2.79473225 | 0.007010951 | 0.026080691  |
| 235371_at   | 0.169408338 | 2.144656797 | 0.03614036  | 0.098739759  |
| 235372_at   | 9.71E-05    | 0.002655719 | 0.99789007  | 0.998985351  |
| 235373_at   | -0.0588053  | -1.75864256 | 0.083862184 | 0.19030052   |
| 235374_at   | -0.26953686 | -5.46911104 | 9.81E-07    | 1.57E-05     |
| 235375_x_at | -0.24257514 | -3.56540767 | 0.000731188 | 0.003937343  |
| 235376_at   | -0.00319814 | -0.09704794 | 0.923019673 | 0.959727644  |
| 235377_at   | 0.071035091 | 1.095755268 | 0.277671455 | 0.454351139  |
| 235378_at   | -0.06263064 | -1.68980988 | 0.09638132  | 0.211711096  |
| 235379_at   | 0.11905176  | 3.298642534 | 0.001655827 | 0.007786942  |
| 235380_at   | 0.006858561 | 0.243710792 | 0.808306497 | 0.89230255   |
| 235381_at   | 0.077377899 | 1.319213826 | 0.192232207 | 0.351725285  |
| 235382_at   | -0.05238747 | -1.49743789 | 0.139649827 | 0.279487264  |
| 235383_at   | 0.002560181 | 0.049474017 | 0.960709884 | 0.98005127   |
| 235384_at   | -0.02815227 | -0.66485811 | 0.508750887 | 0.679836086  |
| 235385_at   | 0.029029662 | 0.325243009 | 0.746156237 | 0.853153594  |
| 235386_at   | -0.05544089 | -1.36201892 | 0.178407832 | 0.333936542  |
| 235387_at   | -0.00258981 | -0.06511134 | 0.948307097 | 0.97353197   |
| 235388_at   | -0.06573202 | -1.01027997 | 0.316516996 | 0.497705213  |
| 235389_at   | -0.10605929 | -3.53743149 | 0.000797908 | 0.00422013   |
| 235390_at   | -0.24663351 | -4.00646036 | 0.000176324 | 0.001184467  |
| 235391_at   | -0.33118498 | -4.15521805 | 0.000107198 | 0.000781165  |
| 235392_at   | 0.017548642 | 0.596146294 | 0.553374707 | 0.715794693  |
| 235393_at   | 0.106896677 | 2.583896973 | 0.012284352 | 0.041253965  |
| 235394_at   | -0.17635175 | -3.88240946 | 0.000265254 | 0.001673927  |
| 235395_at   | -0.01913226 | -0.51981131 | 0.60515435  | 0.755314833  |

|             |             |             |             |             |
|-------------|-------------|-------------|-------------|-------------|
| 235396_at   | 0.067757078 | 1.476367037 | 0.145202288 | 0.287407796 |
| 235397_at   | 0.020573951 | 0.55215145  | 0.582945627 | 0.738694207 |
| 235398_at   | 0.046005131 | 1.52984056  | 0.131439953 | 0.267415413 |
| 235399_at   | -0.10589539 | -3.24804413 | 0.001925837 | 0.008826734 |
| 235400_at   | -0.07519474 | -1.94412152 | 0.056689456 | 0.140730165 |
| 235401_s_at | -0.04181535 | -2.11751572 | 0.03847235  | 0.10365987  |
| 235402_at   | 0.080757646 | 1.755946105 | 0.084325881 | 0.191231078 |
| 235403_at   | -0.05430926 | -1.39727062 | 0.167603593 | 0.319208206 |
| 235404_at   | 0.00146406  | 0.051475449 | 0.959121833 | 0.979056986 |
| 235405_at   | 0.009430649 | 0.147628502 | 0.883143034 | 0.93747158  |
| 235406_x_at | 0.037587315 | 1.187060815 | 0.239996263 | 0.409917946 |
| 235407_at   | -0.00174595 | -0.04486825 | 0.964364964 | 0.981714013 |
| 235408_x_at | 0.193707913 | 3.363339566 | 0.001362419 | 0.006604036 |
| 235409_at   | 0.178616215 | 2.717394748 | 0.008639086 | 0.030987    |
| 235410_at   | 0.173417152 | 2.427728368 | 0.01828693  | 0.057300672 |
| 235411_at   | 0.005443253 | 0.139694358 | 0.889380782 | 0.940719142 |
| 235412_at   | -0.08538581 | -0.8909791  | 0.376586152 | 0.559355059 |
| 235413_at   | 0.002927517 | 0.100456201 | 0.920325255 | 0.958210281 |
| 235414_at   | 0.050248803 | 1.622033217 | 0.1101679   | 0.23421291  |
| 235415_at   | -0.04845079 | -1.42346621 | 0.159906772 | 0.308217937 |
| 235416_at   | 3.51E-05    | 0.000971076 | 0.999228494 | 0.999586351 |
| 235417_at   | 0.004615541 | 0.092928032 | 0.9262779   | 0.96133974  |
| 235418_at   | -0.06642767 | -1.98268802 | 0.052099274 | 0.131712905 |
| 235419_at   | -0.01474051 | -0.36827218 | 0.713998089 | 0.832159876 |
| 235420_at   | -0.0651645  | -1.35124092 | 0.181815136 | 0.33844317  |
| 235421_at   | 0.403435732 | 4.025703947 | 0.000165409 | 0.001121772 |
| 235422_at   | 0.331374747 | 4.530911404 | 2.94E-05    | 0.000264172 |
| 235423_at   | -0.05564117 | -1.16681662 | 0.248013539 | 0.420175174 |
| 235424_at   | 0.003777426 | 0.100281546 | 0.920463308 | 0.958253247 |
| 235425_at   | 0.097140098 | 3.369437886 | 0.001337456 | 0.006506323 |
| 235426_at   | -0.07381579 | -2.08354969 | 0.041574718 | 0.110231212 |
| 235427_at   | 0.140619626 | 2.773538893 | 0.007426464 | 0.027335162 |
| 235428_at   | 0.222132271 | 4.570893621 | 2.56E-05    | 0.000235225 |
| 235429_at   | 0.237267732 | 5.510724704 | 8.40E-07    | 1.39E-05    |
| 235430_at   | 0.105225919 | 2.379823771 | 0.020596875 | 0.063043697 |
| 235431_s_at | -0.25259897 | -4.46241904 | 3.74E-05    | 0.000323564 |
| 235432_at   | 0.374027241 | 3.598526616 | 0.000659067 | 0.003610212 |
| 235433_at   | -0.13304162 | -3.23245277 | 0.002017064 | 0.009175231 |
| 235434_at   | -0.0029764  | -0.09842537 | 0.921930627 | 0.95910701  |
| 235435_at   | 0.199910352 | 3.516592672 | 0.00085133  | 0.004454707 |
| 235436_at   | -0.00827606 | -0.26756136 | 0.789977002 | 0.880491498 |
| 235437_at   | -0.15098727 | -3.55761697 | 0.000749214 | 0.004020635 |
| 235438_at   | -0.09868966 | -1.50123285 | 0.138667851 | 0.278114096 |
| 235439_at   | -0.00259673 | -0.07210634 | 0.942762964 | 0.970448497 |
| 235440_at   | -0.01021576 | -0.37168857 | 0.711466133 | 0.830421867 |
| 235441_at   | 0.061930924 | 1.573251323 | 0.121047823 | 0.251212877 |
| 235442_at   | 0.030913916 | 0.700968488 | 0.486098511 | 0.660807721 |
| 235443_at   | 0.185566904 | 2.793902391 | 0.00702681  | 0.026135335 |
| 235444_at   | -0.11748172 | -3.55705981 | 0.000750519 | 0.004026673 |
| 235445_at   | -0.04388246 | -1.42650879 | 0.159030857 | 0.306962384 |
| 235446_at   | -0.08562439 | -1.56539127 | 0.122878972 | 0.254069259 |
| 235447_at   | -0.01855399 | -0.63462321 | 0.528145591 | 0.695848671 |
| 235448_at   | 0.131111844 | 3.919797265 | 0.00023469  | 0.001511638 |
| 235449_at   | -0.02719071 | -0.56632433 | 0.573337163 | 0.73136535  |
| 235450_at   | 0.10575626  | 3.314644104 | 0.001578156 | 0.007474665 |
| 235451_at   | 0.40878586  | 5.245676005 | 2.25E-06    | 3.12E-05    |
| 235452_at   | -0.0639025  | -1.50249157 | 0.138343354 | 0.277617463 |
| 235453_at   | 0.020086308 | 0.939893812 | 0.351132505 | 0.534350788 |
| 235454_at   | -0.08680558 | -2.13859091 | 0.036650545 | 0.099810259 |
| 235455_at   | 0.070520546 | 1.506087108 | 0.137419731 | 0.276261195 |
| 235456_at   | 0.111858692 | 1.205471747 | 0.23286922  | 0.401457768 |
| 235457_at   | 0.835355679 | 7.877538598 | 9.24E-11    | 2.01E-08    |
| 235458_at   | 0.156123084 | 2.575191855 | 0.012564858 | 0.042032082 |
| 235459_at   | 0.087240082 | 2.347930219 | 0.022276158 | 0.067195334 |
| 235460_at   | 0.061720364 | 1.753480616 | 0.08475172  | 0.191970589 |
| 235461_at   | -0.02895094 | -0.8956392  | 0.374111988 | 0.557229942 |
| 235462_at   | 0.014039738 | 0.390537227 | 0.697556283 | 0.821006338 |
| 235463_s_at | -0.10550366 | -2.03090214 | 0.046812471 | 0.121192317 |
| 235464_at   | 0.005878045 | 0.183202952 | 0.855271544 | 0.920811251 |
| 235465_at   | 0.388642138 | 4.704491794 | 1.60E-05    | 0.000158508 |
| 235466_s_at | 0.13677483  | 3.289730009 | 0.001700637 | 0.007956961 |
| 235467_s_at | 0.021132036 | 0.433223424 | 0.666443891 | 0.79916046  |
| 235468_at   | -0.93364934 | -7.31776683 | 8.14E-10    | 8.27E-08    |
| 235469_at   | 0.103743538 | 3.556173675 | 0.000752599 | 0.004035412 |
| 235470_at   | -0.06678814 | -1.43930563 | 0.15538755  | 0.30180741  |



|             |             |             |             |             |
|-------------|-------------|-------------|-------------|-------------|
| 235471_at   | -0.01069266 | -0.37577192 | 0.708444153 | 0.828236997 |
| 235472_at   | 0.018068384 | 0.467219837 | 0.642076288 | 0.782495459 |
| 235473_at   | 0.11667327  | 3.171040194 | 0.002417458 | 0.010681268 |
| 235474_at   | -0.13073458 | -3.71609988 | 0.000454025 | 0.002640021 |
| 235475_at   | -0.06237682 | -1.25303846 | 0.215171497 | 0.381000179 |
| 235476_at   | 0.484756847 | 3.346794827 | 0.00143238  | 0.006895297 |
| 235477_at   | 0.016323037 | 0.610237174 | 0.544065455 | 0.708531188 |
| 235478_at   | 0.165709144 | 3.998033662 | 0.000181319 | 0.001214007 |
| 235479_at   | -0.01609651 | -0.36982335 | 0.712848082 | 0.831318177 |
| 235480_at   | 0.017173165 | 0.560454577 | 0.577307195 | 0.734422964 |
| 235481_at   | -0.06259228 | -2.02116251 | 0.047841497 | 0.123185584 |
| 235482_at   | 0.205486695 | 4.134561338 | 0.000114925 | 0.000828959 |
| 235483_at   | 0.055470279 | 1.673914522 | 0.099480586 | 0.216790074 |
| 235484_at   | 0.24617878  | 2.862403835 | 0.005823348 | 0.022339662 |
| 235485_at   | 0.009512117 | 0.313793348 | 0.754792958 | 0.859072679 |
| 235486_at   | -0.96110831 | -7.43470669 | 5.17E-10    | 5.89E-08    |
| 235487_at   | 0.172007726 | 4.367332403 | 5.20E-05    | 0.000426113 |
| 235488_at   | -0.33116574 | -6.47786807 | 2.12E-08    | 7.65E-07    |
| 235489_at   | 0.224045211 | 2.840952847 | 0.006178001 | 0.023480502 |
| 235490_at   | 0.000844946 | 0.030507107 | 0.975766351 | 0.987834679 |
| 235491_at   | -0.03493202 | -0.91352381 | 0.364712649 | 0.548056141 |
| 235492_at   | -0.07301135 | -2.21911087 | 0.030366581 | 0.085927772 |
| 235493_at   | 0.363459961 | 5.105296152 | 3.76E-06    | 4.77E-05    |
| 235494_at   | 0.169253555 | 2.276492242 | 0.026487634 | 0.077169839 |
| 235495_at   | 0.060993388 | 1.752664523 | 0.084893068 | 0.192241441 |
| 235496_at   | 0.175164201 | 4.522495993 | 3.03E-05    | 0.000270818 |
| 235497_at   | -0.60080302 | -5.96271979 | 1.52E-07    | 3.50E-06    |
| 235498_at   | -0.05571053 | -1.79737756 | 0.07743168  | 0.179007688 |
| 235499_at   | -0.02522194 | -0.61768471 | 0.539177645 | 0.705085214 |
| 235500_at   | 0.056896388 | 1.531489032 | 0.131032759 | 0.266793442 |
| 235501_at   | 0.246215132 | 4.851459963 | 9.44E-06    | 0.000101878 |
| 235502_at   | -0.26046216 | -3.76669318 | 0.000386025 | 0.002301101 |
| 235503_at   | -0.03933956 | -1.42373762 | 0.159828485 | 0.308155938 |
| 235504_at   | -0.19180535 | -5.39980915 | 1.27E-06    | 1.94E-05    |
| 235505_s_at | -0.11614608 | -1.95460234 | 0.055409075 | 0.138290873 |
| 235506_at   | 0.027429649 | 0.868439686 | 0.388698529 | 0.57147558  |
| 235507_at   | 0.040203418 | 0.742776031 | 0.460586309 | 0.638999439 |
| 235508_at   | 0.246331327 | 4.746099467 | 1.38E-05    | 0.000139264 |
| 235509_at   | -0.2899829  | -4.4290203  | 4.20E-05    | 0.000356201 |
| 235510_at   | 0.059220856 | 1.487907694 | 0.142140054 | 0.283051433 |
| 235511_at   | 0.192578886 | 5.509184594 | 8.44E-07    | 1.39E-05    |
| 235512_at   | 0.000139367 | 0.003865344 | 0.996929046 | 0.998582476 |
| 235513_at   | 0.018316258 | 0.296398111 | 0.767974615 | 0.867079483 |
| 235514_at   | 0.066295096 | 2.641176899 | 0.010576192 | 0.036477412 |
| 235515_at   | 0.017396671 | 0.505217849 | 0.615301853 | 0.763311787 |
| 235516_at   | 0.068022023 | 2.378816345 | 0.020648138 | 0.063166991 |
| 235517_at   | -0.07786781 | -2.58686381 | 0.012190059 | 0.041010436 |
| 235518_at   | -0.34354251 | -4.34173637 | 5.68E-05    | 0.000458651 |
| 235519_at   | -0.01573754 | -0.56671241 | 0.573075152 | 0.731157038 |
| 235520_at   | 0.059623898 | 2.14968124  | 0.035722481 | 0.097795352 |
| 235521_at   | 0.020249163 | 0.765827244 | 0.446854665 | 0.626732424 |
| 235522_at   | -0.01165724 | -0.4754893  | 0.636206981 | 0.778356485 |
| 235523_at   | 0.008526408 | 0.27053484  | 0.787699944 | 0.878800917 |
| 235524_at   | -0.04050542 | -1.04304492 | 0.30121393  | 0.480728955 |
| 235525_at   | -0.04624878 | -1.13058045 | 0.262840473 | 0.437467095 |
| 235526_at   | 0.058906841 | 1.363225797 | 0.178029348 | 0.333437584 |
| 235527_at   | -0.56308776 | -4.68945547 | 1.68E-05    | 0.000164862 |
| 235528_at   | 0.035562859 | 1.17822951  | 0.243470375 | 0.414300107 |
| 235529_x_at | 0.625160472 | 5.435992271 | 1.11E-06    | 1.74E-05    |
| 235530_at   | 0.005398537 | 0.168632371 | 0.86666686  | 0.927869789 |
| 235531_at   | -0.00074812 | -0.01868674 | 0.98515452  | 0.992908143 |
| 235532_at   | 0.063262473 | 1.416017522 | 0.162066933 | 0.311213351 |
| 235533_at   | 0.025143696 | 0.438484106 | 0.662648641 | 0.796352328 |
| 235534_at   | 0.137795751 | 4.126670218 | 0.000118017 | 0.000848385 |
| 235535_x_at | 0.149326122 | 1.597790894 | 0.11547144  | 0.242602933 |
| 235536_at   | 0.146231789 | 3.372385134 | 0.001325548 | 0.006458938 |
| 235537_at   | 0.0363196   | 1.153256594 | 0.253490123 | 0.426446608 |
| 235538_at   | 0.246462865 | 3.565817012 | 0.000730252 | 0.003933995 |
| 235539_at   | -0.01204864 | -0.25581916 | 0.798986852 | 0.886172488 |
| 235540_at   | 0.107377017 | 2.647895587 | 0.010390715 | 0.035972326 |
| 235541_at   | -0.04415145 | -1.38567    | 0.171101989 | 0.323979583 |
| 235542_at   | 0.20160133  | 2.429432744 | 0.018209208 | 0.057109189 |
| 235543_at   | 0.000257769 | 0.007765779 | 0.993830259 | 0.997199478 |
| 235544_x_at | -0.04135279 | -1.21379942 | 0.229696567 | 0.397594888 |
| 235545_at   | -0.07409335 | -2.16987739 | 0.034085137 | 0.094293213 |

|             |             |             |             |             |
|-------------|-------------|-------------|-------------|-------------|
| 235546_at   | -0.02477983 | -0.89990556 | 0.371855932 | 0.555057791 |
| 235547_at   | 0.045220253 | 1.115833872 | 0.269050708 | 0.444624103 |
| 235548_at   | -0.04554797 | -1.65649576 | 0.102970047 | 0.222563107 |
| 235549_at   | 0.02375639  | 0.73244645  | 0.466817374 | 0.644218066 |
| 235550_at   | -0.04913906 | -1.82594371 | 0.072957825 | 0.170955335 |
| 235551_at   | 0.033146211 | 1.099364741 | 0.276107663 | 0.452554504 |
| 235552_at   | 0.08144131  | 1.591958912 | 0.116777575 | 0.244611146 |
| 235553_at   | -0.07919092 | -2.26981523 | 0.026915225 | 0.078059394 |
| 235554_x_at | 0.001044838 | 0.019441098 | 0.984555307 | 0.992528044 |
| 235555_at   | 0.091452431 | 2.297142963 | 0.02520303  | 0.074201173 |
| 235556_at   | 0.275640645 | 4.501971316 | 3.26E-05    | 0.00028723  |
| 235557_at   | -0.2936258  | -4.70454724 | 1.60E-05    | 0.000158508 |
| 235558_at   | 0.0247626   | 0.797571089 | 0.428341354 | 0.60960519  |
| 235559_at   | 0.085381828 | 2.366478426 | 0.021285266 | 0.06480558  |
| 235560_at   | -0.10664143 | -1.59721672 | 0.115599507 | 0.242786914 |
| 235561_at   | -0.01998669 | -0.27467989 | 0.784528819 | 0.877058358 |
| 235562_at   | -0.08844293 | -1.60958295 | 0.112866486 | 0.238407647 |
| 235563_at   | 0.016028045 | 0.487745431 | 0.627551117 | 0.772160878 |
| 235564_at   | 0.01764868  | 0.512665372 | 0.610113646 | 0.759189353 |
| 235565_at   | 0.012753903 | 0.293289893 | 0.770337336 | 0.868580271 |
| 235566_at   | 0.026534689 | 0.635907201 | 0.527314163 | 0.695286165 |
| 235567_at   | 0.081064207 | 1.047405327 | 0.299216125 | 0.47849488  |
| 235568_at   | 0.125053424 | 3.215411992 | 0.002121418 | 0.009577777 |
| 235569_at   | -0.02923215 | -1.064997   | 0.291248402 | 0.469637523 |
| 235570_at   | 0.095502119 | 1.928085845 | 0.058697283 | 0.144415027 |
| 235571_at   | 0.041137549 | 1.050773319 | 0.297679236 | 0.476739067 |
| 235572_at   | -0.03890409 | -1.10672472 | 0.272938091 | 0.448956175 |
| 235573_at   | -0.55142479 | -4.90524971 | 7.78E-06    | 8.67E-05    |
| 235574_at   | -0.02889937 | -1.04471669 | 0.300446903 | 0.479839762 |
| 235575_at   | 0.027792539 | 0.400108649 | 0.69053216  | 0.815809651 |
| 235576_at   | 0.022960399 | 0.851492592 | 0.397964086 | 0.580325336 |
| 235577_at   | 0.48961642  | 6.650299967 | 1.09E-08    | 4.76E-07    |
| 235578_at   | -0.02136208 | -0.63926794 | 0.525141215 | 0.693587421 |
| 235579_at   | -0.11899239 | -2.58127582 | 0.012368209 | 0.041467366 |
| 235580_at   | -0.00760772 | -0.17222013 | 0.863858221 | 0.926173722 |
| 235581_at   | 0.171984446 | 2.354484065 | 0.02192143  | 0.066358205 |
| 235582_at   | -0.01883967 | -0.48113326 | 0.632214516 | 0.775587639 |
| 235583_at   | -0.04597394 | -1.42544741 | 0.159335987 | 0.307418578 |
| 235584_at   | -0.01666242 | -0.41973167 | 0.676217265 | 0.805605961 |
| 235585_at   | -0.01879568 | -0.59460048 | 0.554400818 | 0.716748571 |
| 235586_at   | -0.02789927 | -0.85522398 | 0.395912369 | 0.578636175 |
| 235587_at   | 0.088902951 | 1.345813471 | 0.183549583 | 0.340636075 |
| 235588_at   | -0.05446477 | -1.44420883 | 0.154008937 | 0.299806925 |
| 235589_s_at | 0.303366579 | 4.420803872 | 4.32E-05    | 0.00036442  |
| 235590_at   | 0.1392528   | 3.139367019 | 0.00265204  | 0.011571313 |
| 235591_at   | -0.1206618  | -3.11935587 | 0.002811075 | 0.01216651  |
| 235592_at   | 0.704341109 | 5.746342014 | 3.46E-07    | 6.73E-06    |
| 235593_at   | 0.37334248  | 3.944919356 | 0.000216088 | 0.001407169 |
| 235594_at   | 0.054521822 | 1.724773851 | 0.089842528 | 0.200661783 |
| 235595_at   | 0.033986453 | 1.036737342 | 0.304119962 | 0.483984291 |
| 235596_at   | 0.024590699 | 0.51899504  | 0.605719904 | 0.755640864 |
| 235597_s_at | 0.006128842 | 0.209808412 | 0.834545368 | 0.90879847  |
| 235598_at   | -0.01918805 | -0.47752284 | 0.634767219 | 0.777340041 |
| 235599_at   | -0.01912035 | -0.90073799 | 0.371416754 | 0.554605999 |
| 235600_at   | -0.02750795 | -0.57120689 | 0.570044974 | 0.728624414 |
| 235601_at   | 0.005228037 | 0.0916158   | 0.927315946 | 0.961970295 |
| 235602_at   | -0.03491494 | -0.87114571 | 0.387231625 | 0.569897115 |
| 235603_at   | -0.17803271 | -4.4686074  | 3.66E-05    | 0.000317591 |
| 235604_x_at | -0.09537106 | -1.6603612  | 0.102187193 | 0.221288402 |
| 235605_at   | 0.02115535  | 0.538329443 | 0.592389796 | 0.74585626  |
| 235606_at   | 0.256354798 | 3.093167315 | 0.003032716 | 0.012963953 |
| 235607_at   | 0.077043183 | 2.269284358 | 0.026949483 | 0.078141788 |
| 235608_at   | -0.00746344 | -0.20439092 | 0.838756654 | 0.910961303 |
| 235609_at   | -0.12484178 | -3.20012153 | 0.002219355 | 0.009951894 |
| 235610_at   | -0.05035089 | -1.81674583 | 0.074374053 | 0.173539736 |
| 235611_at   | -0.15766057 | -2.77942301 | 0.007308885 | 0.026982381 |
| 235612_at   | 0.30945848  | 6.223003306 | 5.64E-08    | 1.62E-06    |
| 235613_at   | 0.16561554  | 3.594855289 | 0.000666714 | 0.003646207 |
| 235614_at   | -0.13772268 | -2.28691638 | 0.025832108 | 0.075669027 |
| 235615_at   | 0.222027176 | 3.393292239 | 0.001243908 | 0.006120527 |
| 235616_at   | 0.210042836 | 4.078816265 | 0.000138562 | 0.000969932 |
| 235617_x_at | -0.23333324 | -3.84707073 | 0.000297637 | 0.001850582 |
| 235618_at   | -0.04337815 | -1.53801735 | 0.129430026 | 0.264300774 |
| 235619_at   | 0.098774814 | 3.135113668 | 0.00268512  | 0.011702008 |
| 235620_x_at | 0.076975959 | 2.259283944 | 0.027602071 | 0.079612245 |

|             |             |             |             |             |
|-------------|-------------|-------------|-------------|-------------|
| 235621_at   | -0.03937541 | -1.06879279 | 0.289548561 | 0.467791067 |
| 235622_at   | -0.00894178 | -0.2853411  | 0.776389538 | 0.871933867 |
| 235623_at   | 0.082151286 | 2.161486414 | 0.034757249 | 0.095762961 |
| 235624_at   | 0.000893267 | 0.031815519 | 0.974727349 | 0.987265038 |
| 235625_at   | -0.17768913 | -2.34599918 | 0.022381648 | 0.067427073 |
| 235626_at   | -0.60682343 | -7.17803474 | 1.40E-09    | 1.16E-07    |
| 235627_at   | 0.053614642 | 2.087062639 | 0.041244081 | 0.109530005 |
| 235628_x_at | 0.005852293 | 0.166310374 | 0.868485535 | 0.928728628 |
| 235629_at   | -0.03405194 | -0.97997841 | 0.331127711 | 0.513649637 |
| 235630_at   | -0.0432557  | -1.1995557  | 0.235142391 | 0.404104434 |
| 235631_at   | -0.02078987 | -0.55032547 | 0.584189127 | 0.739883616 |
| 235632_at   | 0.055999077 | 1.380659375 | 0.172630279 | 0.326072119 |
| 235633_at   | -0.0297463  | -0.76170254 | 0.449294069 | 0.628713462 |
| 235634_at   | 0.040418085 | 0.729127298 | 0.468829709 | 0.645719047 |
| 235635_at   | 0.647997224 | 6.937944125 | 3.56E-09    | 2.18E-07    |
| 235636_at   | 0.036327902 | 1.130659583 | 0.262807425 | 0.437460965 |
| 235637_s_at | 0.002046231 | 0.061686965 | 0.951022159 | 0.974975508 |
| 235638_at   | -0.04451505 | -1.36782801 | 0.176591699 | 0.331383784 |
| 235639_at   | 0.151897739 | 2.034528025 | 0.046434294 | 0.120408556 |
| 235640_at   | -0.12821975 | -3.60058866 | 0.000654809 | 0.003590871 |
| 235641_at   | -0.04882262 | -0.94614852 | 0.347960269 | 0.53096506  |
| 235642_at   | 0.126177892 | 1.851273597 | 0.069174254 | 0.164259909 |
| 235643_at   | 0.205844837 | 3.40753138  | 0.001191057 | 0.005896183 |
| 235644_at   | 0.007384152 | 0.307467153 | 0.759578545 | 0.861513662 |
| 235645_at   | -0.0383985  | -0.87723957 | 0.383940907 | 0.566627932 |
| 235646_at   | 0.174622332 | 3.197046092 | 0.00223956  | 0.01003111  |
| 235647_at   | -0.24645258 | -5.67662827 | 4.51E-07    | 8.32E-06    |
| 235648_at   | -0.02255216 | -0.53543956 | 0.594373435 | 0.747495218 |
| 235649_at   | -0.14389252 | -2.03911353 | 0.045959808 | 0.119523847 |
| 235650_at   | 0.075610588 | 1.099315825 | 0.276128814 | 0.452555978 |
| 235651_at   | -0.23011074 | -4.15867035 | 0.000105956 | 0.000773506 |
| 235652_at   | 0.114807022 | 1.739748956 | 0.087156211 | 0.196181585 |
| 235653_s_at | -0.05455008 | -1.72499265 | 0.089802793 | 0.200613136 |
| 235654_at   | 0.066258072 | 1.614274454 | 0.111843397 | 0.236848711 |
| 235655_at   | -0.13943485 | -4.86442039 | 9.01E-06    | 9.80E-05    |
| 235656_s_at | -0.06161151 | -1.89519311 | 0.063005819 | 0.152852896 |
| 235657_at   | -0.02216913 | -0.56419435 | 0.574776245 | 0.732480422 |
| 235658_at   | -0.09054658 | -1.72054426 | 0.090613521 | 0.201943222 |
| 235659_at   | -0.07038283 | -2.11767221 | 0.038458537 | 0.103635148 |
| 235660_at   | 0.107394062 | 2.943652886 | 0.004643944 | 0.018562485 |
| 235661_at   | -0.00533469 | -0.13451413 | 0.893457251 | 0.942985632 |
| 235662_at   | -0.09981484 | -2.02309318 | 0.047635979 | 0.122804982 |
| 235663_at   | -0.02680114 | -0.66386832 | 0.50937969  | 0.680420642 |
| 235664_at   | 0.182209784 | 4.049704253 | 0.000152708 | 0.001049167 |
| 235665_at   | -0.05847837 | -1.21689432 | 0.228525555 | 0.396046753 |
| 235666_at   | 0.044469063 | 0.984144971 | 0.329092562 | 0.511486864 |
| 235667_at   | -0.001143   | -0.04202178 | 0.966624269 | 0.983103056 |
| 235668_at   | -0.03907038 | -1.1310409  | 0.262648213 | 0.437263419 |
| 235669_at   | 0.004561198 | 0.153726026 | 0.878354242 | 0.934828889 |
| 235670_at   | 0.047413222 | 1.238839675 | 0.220347056 | 0.387310258 |
| 235671_at   | -0.04269248 | -0.99040145 | 0.326052246 | 0.508193031 |
| 235672_at   | 0.044461037 | 1.072082585 | 0.288080866 | 0.466228863 |
| 235673_at   | -0.02447958 | -0.73088106 | 0.467765823 | 0.644889723 |
| 235674_at   | -0.12109861 | -3.44125612 | 0.001074243 | 0.00540603  |
| 235675_at   | 0.125748618 | 2.697852323 | 0.009102073 | 0.032338806 |
| 235676_at   | 0.182132429 | 3.078355967 | 0.003165201 | 0.013432643 |
| 235677_at   | -0.03062261 | -0.92265518 | 0.359972489 | 0.543106153 |
| 235678_at   | 0.018660793 | 0.512874449 | 0.609968283 | 0.759078308 |
| 235679_at   | -0.0955673  | -2.64473187 | 0.01047768  | 0.036214449 |
| 235680_at   | 0.306770614 | 4.39311533  | 4.76E-05    | 0.000394744 |
| 235681_at   | 0.087823451 | 1.947356933 | 0.056291536 | 0.139983382 |
| 235682_s_at | 0.01913492  | 0.453511212 | 0.651856647 | 0.788989179 |
| 235683_at   | -0.17515003 | -3.02025026 | 0.003738954 | 0.015490994 |
| 235684_s_at | -0.15876349 | -3.07630494 | 0.003183968 | 0.01350203  |
| 235685_at   | -0.18648373 | -4.24539057 | 7.90E-05    | 0.000604507 |
| 235686_at   | 0.014433545 | 0.443988992 | 0.658686706 | 0.793713129 |
| 235687_at   | -0.04163682 | -1.67256738 | 0.099746959 | 0.217182652 |
| 235688_s_at | 0.07655399  | 2.163929952 | 0.034560336 | 0.095314441 |
| 235689_at   | -0.13819206 | -3.94657088 | 0.000214916 | 0.001400558 |
| 235690_at   | -0.02992237 | -0.7791024  | 0.43905624  | 0.61950816  |
| 235691_at   | 0.051284271 | 1.659507527 | 0.102359665 | 0.2215746   |
| 235692_at   | -0.14849646 | -3.12306362 | 0.00278095  | 0.01205258  |
| 235693_at   | 0.502051571 | 4.194374836 | 9.39E-05    | 0.000698085 |
| 235694_at   | 0.366576512 | 4.723502161 | 1.49E-05    | 0.000149147 |
| 235695_at   | -0.06102401 | -1.5071529  | 0.137146889 | 0.27584918  |

|             |             |             |             |             |
|-------------|-------------|-------------|-------------|-------------|
| 235696_at   | 0.077408176 | 1.597910369 | 0.115444806 | 0.242569782 |
| 235697_at   | 0.188193817 | 4.312282621 | 6.28E-05    | 0.000497936 |
| 235698_at   | 0.126756612 | 1.761785096 | 0.083324451 | 0.18933986  |
| 235699_at   | -0.33481654 | -6.8569327  | 4.88E-09    | 2.74E-07    |
| 235700_at   | -0.28626865 | -2.9832161  | 0.004153762 | 0.016920969 |
| 235701_at   | 0.021209579 | 0.520459869 | 0.604705166 | 0.754880682 |
| 235702_at   | -0.0134678  | -0.39453591 | 0.694618519 | 0.818991976 |
| 235703_at   | -0.00582566 | -0.18242214 | 0.855881434 | 0.921068484 |
| 235704_at   | -0.03601213 | -1.04807465 | 0.298910267 | 0.478128048 |
| 235705_at   | 0.243065604 | 4.449669842 | 3.91E-05    | 0.000335891 |
| 235706_at   | 0.173184996 | 3.519735799 | 0.00084306  | 0.004420081 |
| 235707_at   | -0.11116035 | -3.19362435 | 0.002262243 | 0.010111429 |
| 235708_at   | -0.05108582 | -1.23964683 | 0.220050409 | 0.386967933 |
| 235709_at   | -0.02499752 | -0.68432302 | 0.496470321 | 0.66955103  |
| 235710_at   | -0.04780197 | -1.80653395 | 0.075973329 | 0.176330295 |
| 235711_at   | -0.0627713  | -2.19850254 | 0.031877277 | 0.08940441  |
| 235712_at   | -0.05014519 | -1.13814893 | 0.259692871 | 0.433730475 |
| 235713_at   | -0.02310518 | -0.76705604 | 0.446129437 | 0.626108236 |
| 235714_at   | 0.041685751 | 1.162817132 | 0.249619937 | 0.422064702 |
| 235715_at   | 0.013288565 | 0.495083791 | 0.622393366 | 0.768040826 |
| 235716_at   | -0.23938079 | 2.921769961 | 0.004937631 | 0.019521641 |
| 235717_at   | -0.00139407 | -0.04115155 | 0.967315045 | 0.983408625 |
| 235718_at   | -0.03962749 | -0.92175431 | 0.360438368 | 0.543662219 |
| 235719_at   | -0.13474813 | -2.68184499 | 0.009498116 | 0.033466555 |
| 235720_at   | 0.02840616  | 1.046760985 | 0.299510771 | 0.478848657 |
| 235721_at   | -0.07415311 | -1.73781857 | 0.087498716 | 0.196803856 |
| 235722_at   | 0.074763009 | 2.319560553 | 0.023871406 | 0.07109562  |
| 235723_at   | 0.027033996 | 0.805669053 | 0.423692836 | 0.605244526 |
| 235724_at   | 0.008814729 | 0.317351277 | 0.752105709 | 0.85732416  |
| 235725_at   | 0.231639612 | 5.118001437 | 3.59E-06    | 4.59E-05    |
| 235726_at   | -0.07469314 | -1.53396537 | 0.130422959 | 0.265854635 |
| 235727_at   | 0.126500262 | 2.930985284 | 0.004811914 | 0.019117616 |
| 235728_at   | 0.049921465 | 1.301348792 | 0.198235282 | 0.359398452 |
| 235729_at   | 0.2568949   | 3.823862026 | 0.000320935 | 0.00196995  |
| 235730_at   | 0.092785094 | 2.291550645 | 0.02554533  | 0.07498666  |
| 235731_at   | -0.04393808 | -1.26019035 | 0.212598856 | 0.377746912 |
| 235732_at   | -0.07731908 | -2.01064721 | 0.048974307 | 0.125430358 |
| 235733_at   | 0.099491483 | 2.602629608 | 0.011699933 | 0.039631151 |
| 235734_at   | 0.014537526 | 0.43840173  | 0.662708002 | 0.796368638 |
| 235735_at   | -0.08405474 | -2.42830365 | 0.018260663 | 0.057242447 |
| 235736_at   | -0.47526455 | -7.66186519 | 2.14E-10    | 3.39E-08    |
| 235737_at   | -0.0007478  | -0.02963923 | 0.976455546 | 0.988219005 |
| 235738_at   | -0.0301045  | -0.71705408 | 0.476190837 | 0.652092394 |
| 235739_at   | 0.120558862 | 1.58657709  | 0.117993427 | 0.246580111 |
| 235740_at   | -1.54274625 | -7.37235638 | 6.58E-10    | 7.05E-08    |
| 235741_at   | -0.10560364 | -2.55759399 | 0.013149751 | 0.043610021 |
| 235742_at   | 0.072794437 | 2.104238262 | 0.039660207 | 0.10616915  |
| 235743_at   | 0.206613198 | 2.574368317 | 0.012591693 | 0.042109246 |
| 235744_at   | -0.12107673 | -2.82205663 | 0.006506832 | 0.024496955 |
| 235745_at   | -0.001601   | -0.04752558 | 0.962256037 | 0.980822579 |
| 235746_s_at | -0.01766401 | -0.55228938 | 0.582851748 | 0.738638512 |
| 235747_at   | -0.28093142 | -3.43246489 | 0.0011036   | 0.005528763 |
| 235748_s_at | -0.03652026 | -0.99211398 | 0.32522332  | 0.507396517 |
| 235749_at   | 0.007716537 | 0.265075901 | 0.791881752 | 0.881442037 |
| 235750_at   | 0.058484279 | 2.254340109 | 0.02792982  | 0.080391545 |
| 235751_s_at | 0.018493228 | 0.632379202 | 0.529600309 | 0.697061758 |
| 235752_at   | 0.027700175 | 0.907991017 | 0.367604136 | 0.550789998 |
| 235753_at   | 0.054516409 | 2.014617734 | 0.048543878 | 0.12458499  |
| 235754_at   | 0.023020756 | 0.735162136 | 0.465174569 | 0.643003274 |
| 235755_at   | 0.031842691 | 0.92723075  | 0.357612271 | 0.540640269 |
| 235756_at   | 0.114673687 | 2.128823114 | 0.037485318 | 0.101599219 |
| 235757_at   | 0.020491611 | 0.348001533 | 0.729086764 | 0.84192996  |
| 235758_at   | -0.23254329 | -4.05319803 | 0.00015094  | 0.001039093 |
| 235759_at   | -0.11837542 | -1.70316476 | 0.093839055 | 0.207462529 |
| 235760_at   | -0.113899   | -3.0012405  | 0.003946799 | 0.016218309 |
| 235761_at   | 0.013584959 | 0.333201382 | 0.740172206 | 0.849294701 |
| 235762_at   | -0.0732171  | -1.08083506 | 0.28420117  | 0.461621613 |
| 235763_at   | 0.031506194 | 1.171263833 | 0.246236037 | 0.417755951 |
| 235764_at   | 0.064473271 | 1.935474855 | 0.0577647   | 0.142780819 |
| 235765_at   | -0.02136452 | -0.53844813 | 0.592308398 | 0.745813845 |
| 235766_x_at | 0.159703598 | 2.53921504  | 0.013786866 | 0.045336075 |
| 235767_x_at | 0.220962588 | 2.884562415 | 0.005476838 | 0.021234565 |
| 235768_at   | -0.25017962 | -5.50801701 | 8.48E-07    | 1.40E-05    |
| 235769_at   | 0.040029322 | 1.075791567 | 0.28643234  | 0.464418595 |
| 235770_at   | 0.056991033 | 1.369089302 | 0.176199247 | 0.330899291 |

|             |             |             |             |             |
|-------------|-------------|-------------|-------------|-------------|
| 235771_at   | -0.05700553 | -1.43520171 | 0.156548806 | 0.303284894 |
| 235772_at   | -0.01803876 | -0.57274526 | 0.569009608 | 0.728016286 |
| 235773_at   | -0.02251558 | -0.74141621 | 0.461403849 | 0.639670591 |
| 235774_at   | -0.02075926 | -0.65879781 | 0.512607463 | 0.683374679 |
| 235775_at   | 0.463355127 | 4.085308816 | 0.000135585 | 0.000952909 |
| 235776_x_at | 0.032158374 | 1.039714106 | 0.302746134 | 0.482416309 |
| 235777_at   | 0.054364961 | 1.475190283 | 0.145517421 | 0.287865819 |
| 235778_s_at | 0.044232734 | 1.228884329 | 0.224030096 | 0.3912049   |
| 235779_at   | -0.04839684 | -1.27747911 | 0.206474093 | 0.369977434 |
| 235780_at   | -0.08369016 | -0.95280751 | 0.344603596 | 0.527504586 |
| 235781_at   | -0.66967371 | -5.96915206 | 1.49E-07    | 3.43E-06    |
| 235782_at   | -0.05863345 | -1.69993248 | 0.094449244 | 0.208471238 |
| 235783_at   | -0.08042154 | -2.11959966 | 0.038288756 | 0.103286153 |
| 235784_at   | 0.112922769 | 3.017906255 | 0.00376402  | 0.015581842 |
| 235785_at   | 0.024409168 | 0.658311302 | 0.512917739 | 0.683618614 |
| 235786_at   | -0.02732224 | -0.70354963 | 0.484501027 | 0.659358097 |
| 235787_at   | -0.10690688 | -2.67296147 | 0.009724647 | 0.034124838 |
| 235788_at   | 0.010554352 | 0.238010875 | 0.812703411 | 0.894899535 |
| 235789_at   | 0.120195135 | 2.30834168  | 0.024529787 | 0.072625719 |
| 235790_at   | 0.005061477 | 0.134213137 | 0.893694198 | 0.943160978 |
| 235791_x_at | 0.213059698 | 4.009745519 | 0.000174412 | 0.001173669 |
| 235792_x_at | 0.056883172 | 1.083663667 | 0.28295513  | 0.460350589 |
| 235793_at   | -0.11997075 | -2.60905545 | 0.011505362 | 0.039106041 |
| 235794_at   | 0.414544328 | 2.915268784 | 0.005028147 | 0.019807105 |
| 235795_at   | 0.653559645 | 5.984363085 | 1.40E-07    | 3.29E-06    |
| 235796_at   | 0.098029844 | 2.247318787 | 0.028401209 | 0.08151736  |
| 235797_x_at | -0.01045098 | -0.2332743  | 0.816361819 | 0.897353938 |
| 235798_at   | -0.119194   | -1.57283416 | 0.121144455 | 0.251331723 |
| 235799_at   | 0.013910981 | 0.397287533 | 0.69259967  | 0.817560668 |
| 235800_at   | 0.058030827 | 1.785119312 | 0.079420621 | 0.182595112 |
| 235801_at   | -0.56502632 | -6.66272189 | 1.04E-08    | 4.59E-07    |
| 235802_at   | -0.00717046 | -0.14051715 | 0.888733575 | 0.940368411 |
| 235803_at   | -0.10601212 | -1.14675667 | 0.256145708 | 0.429636478 |
| 235804_at   | 0.185313073 | 3.897987851 | 0.000252081 | 0.001604398 |
| 235805_at   | 0.194653986 | 4.588413492 | 2.41E-05    | 0.000223097 |
| 235806_at   | -0.03160854 | -0.94796023 | 0.347044913 | 0.530044897 |
| 235807_at   | -0.00161928 | -0.04353695 | 0.965421612 | 0.982402396 |
| 235808_at   | 0.047513284 | 1.339921121 | 0.185446803 | 0.343088485 |
| 235809_at   | -0.03995166 | -1.14799305 | 0.255639053 | 0.429039095 |
| 235810_at   | 0.138850075 | 3.726279091 | 0.000439483 | 0.002566492 |
| 235811_at   | 0.110655582 | 2.603647577 | 0.011668911 | 0.039548639 |
| 235812_at   | -0.0330388  | -0.76751169 | 0.445860688 | 0.625898459 |
| 235813_at   | -0.00682359 | -0.21610155 | 0.829659508 | 0.905539911 |
| 235814_at   | 0.05844167  | 1.430250116 | 0.157958892 | 0.305381269 |
| 235815_at   | 0.03967747  | 1.325139887 | 0.19027149  | 0.349104353 |
| 235816_s_at | 0.05895908  | 1.53688132  | 0.1297078   | 0.264783309 |
| 235817_at   | 0.114174272 | 3.350451259 | 0.001416632 | 0.00683262  |
| 235818_at   | -0.03916007 | -1.32103134 | 0.191629245 | 0.350966897 |
| 235819_at   | -0.03673276 | -1.23776037 | 0.220744185 | 0.387657633 |
| 235820_at   | -0.12436988 | -4.06259895 | 0.000146278 | 0.001013562 |
| 235821_at   | 0.007570182 | 0.174980642 | 0.86169838  | 0.924708845 |
| 235822_at   | 0.069843954 | 2.057572257 | 0.044091919 | 0.115595474 |
| 235823_at   | 0.036191824 | 1.25600842  | 0.214100378 | 0.379675188 |
| 235824_at   | 0.033953471 | 1.09002527  | 0.280166645 | 0.457362301 |
| 235825_at   | 0.164247113 | 3.534244707 | 0.000805866 | 0.004254666 |
| 235826_at   | 0.039695199 | 1.01737425  | 0.313159939 | 0.49418255  |
| 235827_at   | 0.052876291 | 1.689171097 | 0.096504324 | 0.211892321 |
| 235828_at   | 0.054630289 | 1.698774337 | 0.09466867  | 0.208808789 |
| 235829_at   | 0.293345467 | 5.081355671 | 4.11E-06    | 5.12E-05    |
| 235830_at   | -0.12111846 | -3.06862878 | 0.003255132 | 0.013764628 |
| 235831_at   | -0.37660603 | -5.236475   | 2.32E-06    | 3.20E-05    |
| 235832_at   | 0.041421817 | 1.14238362  | 0.25794346  | 0.431712134 |
| 235833_at   | -0.02903693 | -0.77571317 | 0.441039565 | 0.621382507 |
| 235834_at   | 0.327614635 | 5.855128186 | 2.29E-07    | 4.80E-06    |
| 235835_at   | -0.08902288 | -2.71467058 | 0.008702304 | 0.031158737 |
| 235836_at   | -0.47366141 | -6.93923261 | 3.55E-09    | 2.17E-07    |
| 235837_at   | -0.0323538  | -0.90999034 | 0.366557589 | 0.549737978 |
| 235838_at   | -0.02693389 | -0.94012919 | 0.351012787 | 0.534223173 |
| 235839_at   | 0.071160771 | 1.397647472 | 0.167490875 | 0.319061515 |
| 235840_at   | -0.00245821 | -0.06240036 | 0.950456487 | 0.974619156 |
| 235841_at   | -0.00024333 | -0.007795   | 0.993807041 | 0.99719857  |
| 235842_at   | 0.059920656 | 1.405820713 | 0.16506061  | 0.315575325 |
| 235843_at   | 0.010436075 | 0.238866759 | 0.812042792 | 0.894530027 |
| 235844_at   | 0.005746721 | 0.193861321 | 0.846955299 | 0.915851106 |
| 235845_at   | 0.019886828 | 0.552497171 | 0.582710332 | 0.73858452  |

|             |             |             |             |             |
|-------------|-------------|-------------|-------------|-------------|
| 235846_at   | 0.068442487 | 1.494201738 | 0.14049154  | 0.280744372 |
| 235847_at   | 0.273414837 | 5.2673186   | 2.07E-06    | 2.92E-05    |
| 235848_x_at | -0.37393206 | -7.09788997 | 1.91E-09    | 1.41E-07    |
| 235849_at   | -0.0148272  | -0.40427207 | 0.687485245 | 0.813629494 |
| 235850_at   | -0.51374675 | -6.24075862 | 5.27E-08    | 1.53E-06    |
| 235851_s_at | -0.00602779 | -0.15005667 | 0.881235494 | 0.936536673 |
| 235852_at   | 0.599683722 | 4.796850033 | 1.15E-05    | 0.00011967  |
| 235853_at   | -0.05595408 | -1.53006346 | 0.131384835 | 0.267327615 |
| 235854_x_at | 0.02114989  | 0.590459353 | 0.557154383 | 0.719268139 |
| 235855_at   | 0.033685489 | 1.036141999 | 0.304395233 | 0.484340997 |
| 235856_at   | 0.342723071 | 3.87138787  | 0.000274972 | 0.001728174 |
| 235857_at   | 0.156703576 | 4.316196056 | 6.20E-05    | 0.000492432 |
| 235858_at   | -0.00540775 | -0.1330009  | 0.894648601 | 0.943774889 |
| 235859_at   | -0.03080438 | -0.63655794 | 0.526893049 | 0.694976954 |
| 235860_at   | -0.07987901 | -2.76276599 | 0.007646252 | 0.028001172 |
| 235861_at   | -0.01724605 | -0.50693095 | 0.614106682 | 0.762231117 |
| 235862_at   | 0.031889107 | 0.978560441 | 0.331822217 | 0.514341436 |
| 235863_at   | 0.032445301 | 0.483195921 | 0.630758151 | 0.774443992 |
| 235864_at   | -0.1302767  | -4.12389296 | 0.000119124 | 0.000855107 |
| 235865_at   | -0.09487635 | -2.87765476 | 0.005582755 | 0.021581566 |
| 235866_at   | 0.043107894 | 1.218660841 | 0.227859119 | 0.395357369 |
| 235867_at   | 0.069118875 | 1.019166074 | 0.312315854 | 0.49326855  |
| 235868_at   | -0.09051812 | -2.06524298 | 0.043335243 | 0.114012992 |
| 235869_at   | -0.03607678 | -0.81174344 | 0.420225881 | 0.602275271 |
| 235870_at   | 0.010217126 | 0.263354918 | 0.793201388 | 0.882339559 |
| 235871_at   | -0.03199443 | -0.99789492 | 0.322435541 | 0.504350036 |
| 235872_at   | -0.03032931 | -0.97103685 | 0.335523329 | 0.518309378 |
| 235873_at   | -0.09315402 | -2.04034538 | 0.045833058 | 0.11924386  |
| 235874_at   | -0.07835684 | -0.82250375 | 0.414126554 | 0.596305946 |
| 235875_at   | 0.085509272 | 1.910986754 | 0.060904674 | 0.148797446 |
| 235876_at   | 0.046602705 | 1.83922875  | 0.070952292 | 0.167361579 |
| 235877_at   | 0.060949321 | 1.710197706 | 0.092522578 | 0.205201679 |
| 235878_at   | -0.01573338 | -0.36800858 | 0.714193588 | 0.832300908 |
| 235879_at   | 0.324758033 | 3.405215282 | 0.001199507 | 0.005934066 |
| 235880_at   | -0.30253823 | -6.80444147 | 5.98E-09    | 3.13E-07    |
| 235881_at   | -0.03811412 | -1.05061057 | 0.297753376 | 0.476806546 |
| 235882_at   | -0.30322733 | -6.62459923 | 1.20E-08    | 5.14E-07    |
| 235883_at   | 0.046524095 | 1.178937916 | 0.243190368 | 0.413997026 |
| 235884_at   | 0.028345384 | 0.809247273 | 0.421648492 | 0.603636185 |
| 235885_at   | -0.36413179 | -1.63076743 | 0.108306156 | 0.231296803 |
| 235886_at   | -0.00402974 | -0.10368883 | 0.917770548 | 0.95646398  |
| 235887_at   | 0.055319803 | 1.803668126 | 0.076427282 | 0.17714387  |
| 235888_at   | -0.11905803 | -0.89756688 | 0.373091555 | 0.556122061 |
| 235889_at   | -0.01661063 | -0.31759276 | 0.751923428 | 0.857266523 |
| 235890_at   | -0.3739954  | -4.65946979 | 1.87E-05    | 0.000180696 |
| 235891_at   | -0.08366256 | -2.05107617 | 0.044741643 | 0.116971047 |
| 235892_at   | 0.13983827  | 1.945004701 | 0.056580597 | 0.140553613 |
| 235893_at   | 0.049962032 | 1.688009608 | 0.096728309 | 0.212222954 |
| 235894_at   | 0.082481386 | 2.226833038 | 0.029816967 | 0.084713975 |
| 235895_at   | 0.226308975 | 4.665404119 | 1.83E-05    | 0.00017736  |
| 235896_s_at | 0.04554566  | 0.822574707 | 0.41408651  | 0.596267497 |
| 235897_at   | -0.01679346 | -0.53741865 | 0.593014636 | 0.746290376 |
| 235898_at   | 0.009759973 | 0.220076981 | 0.826576533 | 0.903808343 |
| 235899_at   | 0.042195618 | 1.34876853  | 0.182603683 | 0.339524583 |
| 235900_at   | 0.031375512 | 0.900249773 | 0.371674291 | 0.554879323 |
| 235901_at   | 0.119364845 | 2.012341128 | 0.048790276 | 0.125099524 |
| 235902_at   | 0.116614258 | 2.17928101  | 0.033345479 | 0.092632778 |
| 235903_at   | 0.071276164 | 2.395922882 | 0.019792981 | 0.061077672 |
| 235904_at   | -0.00099792 | -0.02446158 | 0.980567583 | 0.990272663 |
| 235905_at   | 0.015703881 | 0.556892586 | 0.57972282  | 0.736373316 |
| 235906_at   | -0.00973286 | -0.34400393 | 0.732075399 | 0.843665429 |
| 235907_at   | 0.026002809 | 0.764754548 | 0.447488326 | 0.627133532 |
| 235908_at   | -0.00978502 | -0.34589224 | 0.730663162 | 0.842956944 |
| 235909_at   | -0.12561235 | -3.15007709 | 0.002570428 | 0.011262505 |
| 235910_x_at | -0.05684515 | -1.59905635 | 0.11518959  | 0.242120781 |
| 235911_at   | 0.077295269 | 1.486354322 | 0.142549244 | 0.283651416 |
| 235912_at   | 0.080721742 | 2.622699113 | 0.011101971 | 0.03795084  |
| 235913_at   | -0.04624704 | -1.21460855 | 0.229389997 | 0.397114106 |
| 235914_at   | 0.045441029 | 1.386279837 | 0.170916694 | 0.323738458 |
| 235915_at   | -0.04290396 | -1.7342817  | 0.088129149 | 0.197813667 |
| 235916_at   | 0.082438096 | 0.931000885 | 0.355675046 | 0.538732093 |
| 235917_at   | 0.013497145 | 0.362664494 | 0.718161069 | 0.834986719 |
| 235918_x_at | 0.142281157 | 2.154249402 | 0.035346225 | 0.096991066 |
| 235919_at   | 0.215308396 | 2.964211744 | 0.004382885 | 0.01769466  |
| 235920_at   | -0.06530246 | -1.74688387 | 0.085899889 | 0.193988775 |

|             |             |             |             |             |
|-------------|-------------|-------------|-------------|-------------|
| 235921_at   | 0.013233267 | 0.390458947 | 0.69761384  | 0.821007445 |
| 235922_at   | 0.017697603 | 0.642861486 | 0.522822949 | 0.691608798 |
| 235923_at   | -0.05063795 | -1.53626684 | 0.129858244 | 0.265017793 |
| 235924_at   | -0.14787024 | -3.42379744 | 0.001133288 | 0.00565008  |
| 235925_at   | 0.415135198 | 5.51444941  | 8.28E-07    | 1.37E-05    |
| 235926_at   | 0.337836044 | 4.626419798 | 2.10E-05    | 0.000199728 |
| 235927_at   | 0.478367236 | 5.51818089  | 8.17E-07    | 1.36E-05    |
| 235928_at   | -0.10560379 | -3.18066073 | 0.002350154 | 0.010433406 |
| 235929_s_at | -0.04307923 | -0.98770957 | 0.327358054 | 0.509677274 |
| 235930_at   | 0.319345851 | 4.030449261 | 0.00016282  | 0.001107604 |
| 235931_at   | -0.11626424 | -2.08973836 | 0.040993778 | 0.109053209 |
| 235932_x_at | -0.00644928 | -0.1293869  | 0.897494852 | 0.945029684 |
| 235933_at   | -0.01301615 | -0.38455884 | 0.70195718  | 0.824014243 |
| 235934_at   | 0.076427233 | 2.00403287  | 0.049698638 | 0.126885549 |
| 235935_at   | -0.42223177 | -6.15549471 | 7.30E-08    | 1.97E-06    |
| 235936_at   | -0.02216095 | -0.76363756 | 0.44814871  | 0.627656676 |
| 235937_at   | 0.055868083 | 1.462659525 | 0.14890655  | 0.292736425 |
| 235938_at   | -0.05282076 | -1.60213719 | 0.114505722 | 0.241083985 |
| 235939_at   | -0.29615406 | -6.34699572 | 3.50E-08    | 1.12E-06    |
| 235940_at   | 0.129261157 | 1.985205646 | 0.051811038 | 0.131126785 |
| 235941_s_at | 0.060596519 | 1.765985492 | 0.08261018  | 0.188108939 |
| 235942_at   | -0.02011116 | -0.99235149 | 0.32510847  | 0.507270458 |
| 235943_at   | -0.07372052 | -1.69609867 | 0.095177214 | 0.209622513 |
| 235944_at   | -0.01712337 | -0.82915819 | 0.410381609 | 0.592593695 |
| 235945_at   | 0.011096532 | 0.353700465 | 0.72483351  | 0.839210366 |
| 235946_at   | 0.178406116 | 3.227927119 | 0.002044297 | 0.009275505 |
| 235947_at   | -0.02998218 | -0.99644619 | 0.323132669 | 0.505122254 |
| 235948_at   | -0.13677308 | -4.63020804 | 2.08E-05    | 0.000197409 |
| 235949_at   | 0.176889482 | 1.905254041 | 0.061660352 | 0.150257604 |
| 235950_at   | -0.04428572 | -1.04588663 | 0.299910916 | 0.479231243 |
| 235951_s_at | -0.05346212 | -0.79709137 | 0.428617678 | 0.609804262 |
| 235952_at   | -0.67839808 | -5.7119872  | 3.94E-07    | 7.48E-06    |
| 235953_at   | -0.01215685 | -0.32813833 | 0.743977354 | 0.851726622 |
| 235954_at   | 0.183732371 | 3.504036813 | 0.000885143 | 0.004605753 |
| 235955_at   | 0.055329101 | 1.931406042 | 0.058276659 | 0.143657334 |
| 235956_at   | -0.15895425 | -2.00388085 | 0.049715394 | 0.126910246 |
| 235957_at   | -0.16553789 | -3.25402055 | 0.001891909 | 0.008704629 |
| 235958_at   | -0.00804809 | -0.18820568 | 0.851366029 | 0.918442854 |
| 235959_at   | 0.333251628 | 3.110666624 | 0.002882876 | 0.012408887 |
| 235960_at   | -0.01649878 | -0.41492637 | 0.679711872 | 0.808127799 |
| 235961_at   | 0.129151223 | 3.348673353 | 0.001424269 | 0.006862164 |
| 235962_at   | -0.11473691 | -2.43001588 | 0.018182685 | 0.05704602  |
| 235963_at   | -0.07220389 | -2.0090152  | 0.049152177 | 0.125784992 |
| 235964_x_at | 0.510696842 | 4.816096162 | 1.07E-05    | 0.00011296  |
| 235965_at   | -0.10748641 | -3.14358381 | 0.002619622 | 0.011448868 |
| 235966_at   | 0.011141512 | 0.300251938 | 0.76504819  | 0.864973404 |
| 235967_at   | -0.01731086 | -0.63983852 | 0.52477276  | 0.693243322 |
| 235968_at   | 0.020470776 | 0.603951511 | 0.548208245 | 0.711541919 |
| 235969_at   | -0.21342643 | -5.72071798 | 3.82E-07    | 7.28E-06    |
| 235970_at   | 0.120598506 | 3.168628758 | 0.002434609 | 0.010747486 |
| 235971_at   | -0.01599495 | -0.51411102 | 0.609108869 | 0.758429041 |
| 235972_at   | 0.044422722 | 1.094439445 | 0.278243067 | 0.455003262 |
| 235973_at   | -0.02666771 | -0.8968235  | 0.373484861 | 0.556578373 |
| 235974_at   | 0.07849298  | 1.854210777 | 0.068746411 | 0.163478482 |
| 235975_at   | -0.06310002 | -1.51012376 | 0.136388615 | 0.274660784 |
| 235976_at   | -0.25110196 | -4.69018581 | 1.68E-05    | 0.00016458  |
| 235977_at   | -0.5281396  | -4.19934214 | 9.23E-05    | 0.000688255 |
| 235978_at   | -0.05825428 | -2.02788639 | 0.047129036 | 0.121774419 |
| 235979_at   | 0.024881608 | 1.033123226 | 0.305793641 | 0.485886493 |
| 235980_at   | -0.08925013 | -2.63430861 | 0.010768916 | 0.037010167 |
| 235981_at   | 0.023281676 | 0.7057208   | 0.483159546 | 0.658213938 |
| 235982_at   | -0.02798456 | -0.72450146 | 0.47164246  | 0.647975555 |
| 235983_at   | -0.06018063 | -1.29669224 | 0.199822865 | 0.361558036 |
| 235984_at   | -0.0367155  | -0.70403721 | 0.484199594 | 0.659088364 |
| 235985_at   | 0.264355485 | 5.658729117 | 4.82E-07    | 8.78E-06    |
| 235986_at   | -0.05005957 | -1.49226975 | 0.140995948 | 0.281412598 |
| 235987_at   | 0.042269983 | 0.85916535  | 0.393752326 | 0.576421728 |
| 235988_at   | -0.05136268 | -2.15706632 | 0.035115943 | 0.096519172 |
| 235989_at   | 0.000913714 | 0.035516357 | 0.971788781 | 0.985727566 |
| 235990_at   | 0.026170904 | 0.536122649 | 0.593904275 | 0.747094401 |
| 235991_at   | -0.00938568 | -0.23011601 | 0.818803499 | 0.898994998 |
| 235992_s_at | -0.042177   | -1.24353296 | 0.21862628  | 0.385270522 |
| 235993_at   | -0.00717921 | -0.23467756 | 0.815277549 | 0.896529568 |
| 235994_s_at | -0.0326651  | -0.9018366  | 0.370837647 | 0.554055966 |
| 235995_at   | -0.07548169 | -1.6333926  | 0.107751605 | 0.23040212  |

|             |             |             |             |             |
|-------------|-------------|-------------|-------------|-------------|
| 235996_at   | 0.154648673 | 3.404201333 | 0.001203223 | 0.00594916  |
| 235997_at   | 0.001799344 | 0.065280649 | 0.948172874 | 0.973461259 |
| 235998_at   | 0.113233506 | 3.830427875 | 0.000314172 | 0.001935616 |
| 235999_at   | 0.304262287 | 4.893146785 | 8.13E-06    | 8.98E-05    |
| 236000_s_at | 0.362769533 | 5.670704151 | 4.61E-07    | 8.48E-06    |
| 236001_at   | 0.026795316 | 0.805857264 | 0.423585158 | 0.605168079 |
| 236002_at   | 0.11465662  | 2.841718585 | 0.006165005 | 0.023445065 |
| 236003_x_at | -0.09858317 | -2.36252014 | 0.021493361 | 0.065301243 |
| 236004_at   | -0.0572937  | -1.6962259  | 0.095152981 | 0.209582784 |
| 236005_at   | -0.01694047 | -0.42336536 | 0.673579435 | 0.803775711 |
| 236006_s_at | 0.117655328 | 3.299588763 | 0.001651135 | 0.007770113 |
| 236007_at   | 0.37476811  | 5.399472877 | 1.27E-06    | 1.94E-05    |
| 236008_at   | -0.06319228 | -2.08600533 | 0.041343353 | 0.109721921 |
| 236009_at   | -0.01943274 | -0.75845364 | 0.451220954 | 0.630560861 |
| 236010_at   | 0.093470632 | 2.424474071 | 0.018436158 | 0.057675262 |
| 236011_at   | 0.04152668  | 1.501799838 | 0.138521606 | 0.277876369 |
| 236012_at   | 0.025273442 | 0.735231713 | 0.465132524 | 0.642984929 |
| 236013_at   | -0.56695108 | -6.99715362 | 2.83E-09    | 1.84E-07    |
| 236014_at   | 0.016549491 | 0.434465452 | 0.665547051 | 0.798505301 |
| 236015_at   | -0.01468668 | -0.40607379 | 0.6861683   | 0.81254428  |
| 236016_at   | 0.38435581  | -4.69627684 | 1.64E-05    | 0.000161707 |
| 236017_at   | 0.054537277 | 1.624042632 | 0.109737301 | 0.233517733 |
| 236018_at   | -0.05167161 | -1.27992917 | 0.205616866 | 0.368920028 |
| 236019_at   | 0.09801907  | 2.318304489 | 0.023944328 | 0.071251077 |
| 236020_s_at | 0.008907254 | 0.279575606 | 0.78078813  | 0.874741498 |
| 236021_at   | 0.003032453 | 0.084264409 | 0.933133588 | 0.965310623 |
| 236022_at   | 0.057010627 | 1.463279242 | 0.148737498 | 0.292513807 |
| 236023_at   | -0.00449576 | -0.10305767 | 0.918269281 | 0.956782941 |
| 236024_at   | -0.26579002 | -3.81011484 | 0.00033555  | 0.002044937 |
| 236025_at   | -0.00164991 | -0.03927119 | 0.968807743 | 0.984201024 |
| 236026_at   | 0.096779957 | 2.03474263  | 0.046411993 | 0.120378667 |
| 236027_at   | 0.204121527 | 2.921641924 | 0.004939399 | 0.019526903 |
| 236028_at   | -0.08855448 | -3.04203174 | 0.003513366 | 0.014676079 |
| 236029_at   | -0.62371524 | -6.01155662 | 1.27E-07    | 3.04E-06    |
| 236030_at   | -0.05593881 | -1.50560696 | 0.137542788 | 0.276421543 |
| 236031_x_at | -0.00533363 | -0.20897005 | 0.835196752 | 0.909017719 |
| 236032_at   | -0.24743957 | -5.07388775 | 4.22E-06    | 5.24E-05    |
| 236033_at   | -0.03979901 | -1.09231725 | 0.27916671  | 0.456079784 |
| 236034_at   | 0.066953579 | 0.905222904 | 0.369056259 | 0.552317662 |
| 236035_at   | -0.05627392 | -2.14209328 | 0.036355208 | 0.099201415 |
| 236036_at   | 0.018063647 | 0.521483797 | 0.603996321 | 0.754564867 |
| 236037_at   | 0.082891999 | 1.117687149 | 0.268264607 | 0.443636701 |
| 236038_at   | -0.78858396 | -6.02725398 | 1.19E-07    | 2.90E-06    |
| 236039_at   | -0.10083611 | -3.1469494  | 0.002594014 | 0.011353608 |
| 236040_at   | 0.045704103 | 1.118760505 | 0.267810065 | 0.443130968 |
| 236041_at   | -0.0607417  | -1.3532325  | 0.181181823 | 0.337601753 |
| 236042_at   | -0.08768985 | -2.59840081 | 0.011829607 | 0.039982515 |
| 236043_at   | 0.089410405 | 2.186913917 | 0.032755494 | 0.091362948 |
| 236044_at   | 0.336737911 | 4.948746426 | 6.65E-06    | 7.64E-05    |
| 236045_x_at | -0.68458585 | -7.0468538  | 2.33E-09    | 1.62E-07    |
| 236046_at   | -0.05711646 | -1.11086209 | 0.271167588 | 0.447066727 |
| 236047_at   | -0.17705646 | -5.08382695 | 4.07E-06    | 5.08E-05    |
| 236048_at   | -0.03267046 | -0.6501067  | 0.51816537  | 0.687727459 |
| 236049_at   | 0.027480952 | 0.930529776 | 0.355916745 | 0.539010239 |
| 236050_at   | -0.03339841 | -0.94517756 | 0.348451488 | 0.531556549 |
| 236051_at   | 0.055628711 | 1.252465425 | 0.215378617 | 0.381246084 |
| 236052_at   | 0.109400643 | 2.463050547 | 0.016735633 | 0.053242377 |
| 236053_at   | 0.020101284 | 0.497625357 | 0.620611438 | 0.767149943 |
| 236054_at   | 0.062509743 | 1.639347638 | 0.106502185 | 0.228178124 |
| 236055_at   | -0.0682059  | -1.97500952 | 0.052986873 | 0.133451076 |
| 236056_s_at | -0.0113238  | -0.35942713 | 0.720568312 | 0.83652334  |
| 236057_at   | -0.1313022  | -3.19117577 | 0.002278608 | 0.010168301 |
| 236058_at   | -0.02429673 | -0.70579116 | 0.483116107 | 0.658194886 |
| 236059_at   | -0.09689219 | -3.11829234 | 0.002819772 | 0.012193638 |
| 236060_at   | 0.189402591 | 4.438506817 | 4.06E-05    | 0.000346639 |
| 236061_at   | 0.026631341 | 0.712441868 | 0.479019996 | 0.654450853 |
| 236062_at   | 0.123966209 | 3.536621592 | 0.000799923 | 0.004229788 |
| 236063_at   | -0.03626384 | -1.26797481 | 0.20982465  | 0.374425364 |
| 236064_at   | 0.051517649 | 1.502983525 | 0.13821669  | 0.27738921  |
| 236065_at   | -0.21683745 | -6.03485742 | 1.16E-07    | 2.83E-06    |
| 236066_at   | 0.01357942  | 0.438761047 | 0.66244909  | 0.796228524 |
| 236067_at   | 0.203540841 | 3.336077664 | 0.001479497 | 0.007086239 |
| 236068_s_at | -0.13936624 | -5.05965145 | 4.44E-06    | 5.48E-05    |
| 236069_at   | 0.060101954 | 1.864326501 | 0.067289942 | 0.160872061 |
| 236070_at   | 0.031725703 | 0.950117579 | 0.345956981 | 0.529066749 |



|             |             |             |             |             |
|-------------|-------------|-------------|-------------|-------------|
| 236071_at   | -0.02314942 | -0.57442169 | 0.567882373 | 0.727406543 |
| 236072_at   | 0.059925478 | 1.876381697 | 0.065588328 | 0.157722547 |
| 236073_at   | -0.139509   | -3.71291914 | 0.000458663 | 0.002663191 |
| 236074_at   | -0.01165509 | -0.38260667 | 0.703396471 | 0.825032021 |
| 236075_s_at | -0.31086665 | -5.00051081 | 5.51E-06    | 6.52E-05    |
| 236076_at   | 0.006808595 | 0.18872059  | 0.850964258 | 0.918201529 |
| 236077_at   | 0.093409774 | 1.970259715 | 0.053542392 | 0.13453177  |
| 236078_at   | 0.000935266 | 0.036500114 | 0.971007715 | 0.985267245 |
| 236079_at   | 0.134459419 | 3.467375222 | 0.000991329 | 0.005058167 |
| 236080_at   | -0.03977868 | -1.26426145 | 0.211144636 | 0.376040247 |
| 236081_at   | -0.57867846 | -5.28315312 | 1.96E-06    | 2.79E-05    |
| 236082_at   | 0.019213085 | 0.520878355 | 0.604415411 | 0.754798621 |
| 236083_at   | -0.10683682 | -2.50823367 | 0.014924389 | 0.048388214 |
| 236084_at   | -0.00059557 | -0.01864716 | 0.985185966 | 0.992917445 |
| 236085_at   | 0.353561194 | 2.647619662 | 0.010398274 | 0.035991299 |
| 236086_at   | -0.03052554 | -0.86494362 | 0.39059884  | 0.573429051 |
| 236087_at   | -0.43385719 | -5.24761591 | 2.23E-06    | 3.10E-05    |
| 236088_at   | -0.21680325 | -5.77809905 | 3.07E-07    | 6.09E-06    |
| 236089_at   | -0.23166962 | -3.05158358 | 0.003418501 | 0.014352247 |
| 236090_at   | -0.00329309 | -0.07121357 | 0.943470407 | 0.970852223 |
| 236091_at   | 0.005530581 | 0.093657136 | 0.925701195 | 0.961003967 |
| 236092_at   | 0.001575633 | 0.034612357 | 0.972506547 | 0.986031049 |
| 236093_at   | -0.02111306 | -0.63441161 | 0.528282673 | 0.695975383 |
| 236094_at   | 0.352145881 | 6.66433547  | 1.03E-08    | 4.58E-07    |
| 236095_at   | -0.06304828 | -1.10195202 | 0.27499053  | 0.451319333 |
| 236096_at   | 0.018085157 | 0.451595424 | 0.653228415 | 0.789840493 |
| 236097_at   | -0.11527502 | -2.39813742 | 0.019684627 | 0.060797883 |
| 236098_at   | 0.022955724 | 0.783163286 | 0.4366868   | 0.61724886  |
| 236099_at   | 0.107696393 | 2.093871637 | 0.04060972  | 0.108173181 |
| 236100_at   | -0.08563785 | -2.20751049 | 0.031209    | 0.08787756  |
| 236101_at   | -0.01407736 | -0.4069462  | 0.685530969 | 0.812219986 |
| 236102_at   | -0.03843812 | -1.06740099 | 0.290171041 | 0.468474971 |
| 236103_at   | -0.21203432 | -5.92841229 | 1.74E-07    | 3.87E-06    |
| 236104_at   | -0.08955867 | -2.11955993 | 0.038292249 | 0.103286691 |
| 236105_at   | 0.042137937 | 1.054332025 | 0.296061208 | 0.474998833 |
| 236106_at   | 0.055736541 | 1.565961541 | 0.122745375 | 0.253937086 |
| 236107_at   | 0.190563233 | 3.609850192 | 0.000636004 | 0.003507006 |
| 236108_at   | -0.05344402 | -1.62534324 | 0.10945932  | 0.233083474 |
| 236109_at   | 0.00820937  | 0.20061775  | 0.841692539 | 0.913054272 |
| 236110_at   | -0.0416437  | -1.13769148 | 0.259882355 | 0.433933431 |
| 236111_at   | -0.07037071 | -1.87614944 | 0.065620765 | 0.157766594 |
| 236112_at   | 0.070457287 | 1.649576202 | 0.104383656 | 0.22496573  |
| 236113_at   | -0.03244538 | -1.041265   | 0.30203205  | 0.481673544 |
| 236114_at   | 0.006892849 | 0.170690767 | 0.865055252 | 0.926967879 |
| 236115_at   | -0.20718958 | -5.83222992 | 2.50E-07    | 5.16E-06    |
| 236116_at   | 0.050880749 | 1.644019165 | 0.105530325 | 0.226769943 |
| 236117_at   | -0.02413945 | -0.65673418 | 0.51392425  | 0.684537972 |
| 236118_at   | -0.06467737 | -1.74506277 | 0.086219115 | 0.194552393 |
| 236119_s_at | -0.03088991 | -1.00158485 | 0.320664507 | 0.502454264 |
| 236120_at   | 0.222954745 | 2.299289725 | 0.025072714 | 0.073900266 |
| 236121_at   | 0.030209305 | 0.773151131 | 0.442542325 | 0.622795024 |
| 236122_at   | -0.06198246 | -1.61232698 | 0.112267173 | 0.237478441 |
| 236123_at   | -0.37653414 | -7.78817852 | 1.31E-10    | 2.50E-08    |
| 236124_at   | 0.134893484 | 3.255956955 | 0.001881037 | 0.008668521 |
| 236125_at   | 0.010149494 | 0.212417136 | 0.832519202 | 0.907375885 |
| 236126_at   | 0.137648782 | 3.808001087 | 0.000337853 | 0.002055448 |
| 236127_at   | -0.0772082  | -2.34715209 | 0.022318613 | 0.067273346 |
| 236128_at   | 0.026387425 | 0.558704355 | 0.57849353  | 0.735286663 |
| 236129_at   | -0.00638546 | -0.20424669 | 0.838868839 | 0.911045878 |
| 236130_at   | 0.036185743 | 1.342720767 | 0.184543526 | 0.341898572 |
| 236131_at   | -0.10284474 | -1.36624964 | 0.17708375  | 0.332094919 |
| 236132_at   | -0.32080984 | -6.89818443 | 4.16E-09    | 2.43E-07    |
| 236133_x_at | 0.066014665 | 2.202461632 | 0.031582028 | 0.088737833 |
| 236134_at   | 0.053776582 | 1.835141117 | 0.071564371 | 0.168485218 |
| 236135_at   | 0.020156343 | 0.556459932 | 0.580016563 | 0.736527922 |
| 236136_at   | 0.036600221 | 1.346981517 | 0.183175253 | 0.340126019 |
| 236137_at   | 0.002925353 | 0.103114917 | 0.918224042 | 0.956758111 |
| 236138_at   | -0.07322938 | -2.74570583 | 0.008006574 | 0.029122633 |
| 236139_at   | 0.189565236 | 6.180557156 | 6.63E-08    | 1.83E-06    |
| 236140_at   | -0.00081382 | -0.00898249 | 0.992863636 | 0.996856236 |
| 236141_at   | 0.019749233 | 0.947365005 | 0.347345474 | 0.530330431 |
| 236142_at   | -0.1035313  | -2.70124838 | 0.009020019 | 0.03209831  |
| 236143_at   | -0.12816463 | -2.66783077 | 0.009857721 | 0.034497005 |
| 236144_at   | 0.062373512 | 1.965107032 | 0.054150664 | 0.135803295 |
| 236145_at   | -0.08156751 | -1.93315875 | 0.058055653 | 0.143270195 |

|             |             |             |             |             |
|-------------|-------------|-------------|-------------|-------------|
| 236146_at   | -0.06014352 | -2.05917265 | 0.043933111 | 0.115260264 |
| 236147_at   | 0.005511568 | 0.169491391 | 0.865994227 | 0.927595963 |
| 236148_at   | -0.05109754 | -1.40404535 | 0.165586175 | 0.316377125 |
| 236149_at   | -0.07403671 | -1.45170106 | 0.151920819 | 0.296940414 |
| 236150_at   | -0.05427865 | -1.34614178 | 0.183444308 | 0.340553835 |
| 236151_at   | -0.08424146 | -2.05492473 | 0.044355726 | 0.116157629 |
| 236152_at   | 0.057349663 | 1.528552183 | 0.131758899 | 0.267747406 |
| 236153_at   | 0.652066017 | 6.509537437 | 1.87E-08    | 7.04E-07    |
| 236154_at   | 0.567831771 | 5.094162136 | 3.92E-06    | 4.94E-05    |
| 236155_at   | -0.00928892 | -0.20918519 | 0.835029583 | 0.908960441 |
| 236156_at   | 0.024533746 | 0.424294858 | 0.672905336 | 0.803231394 |
| 236157_at   | 0.006818316 | 0.208075579 | 0.835891862 | 0.909432765 |
| 236158_at   | 0.019169187 | 0.560273885 | 0.577429617 | 0.734536886 |
| 236159_x_at | 0.019495264 | 0.486856329 | 0.628177297 | 0.772533964 |
| 236160_at   | 0.017515852 | 0.467575002 | 0.641823732 | 0.782394559 |
| 236161_at   | -0.06242313 | -2.48886541 | 0.015677936 | 0.050437542 |
| 236162_at   | -0.01252619 | -0.40619934 | 0.686076563 | 0.812500232 |
| 236163_at   | 0.402773294 | 5.83947466  | 2.43E-07    | 5.04E-06    |
| 236164_at   | -0.14303512 | -3.10517124 | 0.002929167 | 0.01257665  |
| 236165_at   | 0.029905625 | 1.108450004 | 0.272198808 | 0.448119833 |
| 236166_at   | -0.56118753 | -6.30548585 | 4.11E-08    | 1.27E-06    |
| 236167_at   | 0.091714465 | 2.429658511 | 0.018198935 | 0.057084982 |
| 236168_at   | 0.182414799 | 4.084735464 | 0.000135845 | 0.000954289 |
| 236169_at   | 0.007709379 | 0.20708207  | 0.83666409  | 0.909918516 |
| 236170_x_at | 0.035228665 | 1.043277477 | 0.30110715  | 0.480592863 |
| 236171_at   | -0.01803642 | -0.45416561 | 0.651388354 | 0.788682497 |
| 236172_at   | -0.08602    | -2.49877623 | 0.015288157 | 0.049407643 |
| 236173_s_at | 0.064959983 | 1.441143318 | 0.154869734 | 0.301076086 |
| 236174_at   | 0.026121111 | 0.618135238 | 0.53888269  | 0.704943086 |
| 236175_at   | 0.003353321 | 0.102312251 | 0.918858337 | 0.957141452 |
| 236176_at   | 0.078534232 | 2.258960282 | 0.027623423 | 0.079663549 |
| 236177_s_at | 0.037090006 | 1.040728816 | 0.302278796 | 0.481912174 |
| 236178_at   | -0.01073422 | -0.30237537 | 0.763437215 | 0.863938825 |
| 236179_at   | -0.18795863 | -2.1377911  | 0.036718283 | 0.099946008 |
| 236180_at   | -0.18380754 | -4.91309382 | 7.56E-06    | 8.47E-05    |
| 236181_at   | 0.03479182  | 0.449401642 | 0.654800713 | 0.790842975 |
| 236182_at   | -0.01177051 | -0.27763819 | 0.782267842 | 0.875560089 |
| 236183_at   | -0.07241362 | -1.77570809 | 0.08097638  | 0.185405405 |
| 236184_at   | 0.131334721 | 3.035309394 | 0.003581597 | 0.014920649 |
| 236185_at   | 0.026910864 | 0.75004065  | 0.456232831 | 0.635181386 |
| 236186_x_at | 0.037742889 | 0.677080445 | 0.501020694 | 0.673472595 |
| 236187_s_at | -0.01066892 | -0.24708028 | 0.80571018  | 0.890596579 |
| 236188_s_at | 0.013107846 | 0.390484182 | 0.697595285 | 0.821007228 |
| 236189_at   | -0.0475866  | -1.16883367 | 0.247206208 | 0.418982132 |
| 236190_at   | 0.055104948 | 1.479942284 | 0.144248128 | 0.28611474  |
| 236191_at   | 0.07130953  | 2.538079487 | 0.013827132 | 0.04544508  |
| 236192_at   | 0.048016052 | 1.215616879 | 0.229008369 | 0.396668555 |
| 236193_at   | 0.134998776 | 3.317428592 | 0.001564997 | 0.007423352 |
| 236194_at   | -0.06249273 | -1.11914966 | 0.267645402 | 0.442907701 |
| 236195_x_at | -0.55340767 | -6.69257901 | 9.23E-09    | 4.23E-07    |
| 236196_at   | -0.02467624 | -0.60317786 | 0.548719249 | 0.711936383 |
| 236197_at   | 0.114414425 | 2.917948335 | 0.004990655 | 0.019689474 |
| 236198_at   | -0.01620121 | -0.62625216 | 0.533582888 | 0.70043137  |
| 236199_at   | 0.004222989 | 0.116891911 | 0.90734564  | 0.950840673 |
| 236200_at   | -0.05835809 | -1.48422544 | 0.143111541 | 0.284441029 |
| 236201_at   | 0.093932667 | 2.63180908  | 0.010839843 | 0.037211328 |
| 236202_at   | -0.02756583 | -0.86232761 | 0.392024571 | 0.574777315 |
| 236203_at   | 0.030542098 | 0.731398655 | 0.467452099 | 0.644675962 |
| 236204_at   | -0.13999483 | -3.72073655 | 0.000447345 | 0.002606276 |
| 236205_at   | -0.0600615  | -1.33346838 | 0.187541484 | 0.345533413 |
| 236206_at   | -0.03513133 | -0.78157229 | 0.43761421  | 0.618074649 |
| 236207_at   | 0.304740307 | 3.984771676 | 0.000189457 | 0.001258663 |
| 236208_at   | 0.128308535 | 1.683093603 | 0.097681053 | 0.213736187 |
| 236209_at   | -0.07018577 | -2.26614383 | 0.027152934 | 0.078605968 |
| 236210_at   | 0.065751569 | 1.983168172 | 0.052044197 | 0.131595996 |
| 236211_at   | -0.32311015 | -3.61101243 | 0.000633681 | 0.00349549  |
| 236212_at   | 0.000885771 | 0.033549048 | 0.973350832 | 0.986528981 |
| 236213_at   | -0.0150995  | -0.56992897 | 0.57090575  | 0.729351965 |
| 236214_at   | -0.09111017 | -2.90427776 | 0.005184683 | 0.020297287 |
| 236215_at   | 0.01287038  | 0.265129695 | 0.791840513 | 0.881418088 |
| 236216_at   | 0.160643718 | 4.214669051 | 8.77E-05    | 0.000658777 |
| 236217_at   | 0.001640878 | 0.072007519 | 0.94284127  | 0.970506749 |
| 236218_at   | 0.050898265 | 1.540895383 | 0.128728434 | 0.263235656 |
| 236219_at   | -0.02316826 | -0.82806031 | 0.410998039 | 0.593234647 |
| 236220_at   | -0.34667568 | -7.56427771 | 3.12E-10    | 4.37E-08    |

|             |             |             |             |             |
|-------------|-------------|-------------|-------------|-------------|
| 236221_at   | -0.09863188 | -2.50730256 | 0.014959853 | 0.048483375 |
| 236222_at   | 0.185715535 | 2.607626037 | 0.011548387 | 0.039239757 |
| 236223_s_at | -0.07880761 | -0.97804772 | 0.332073577 | 0.514598901 |
| 236224_at   | 0.020514826 | 0.387315764 | 0.699926428 | 0.822710849 |
| 236225_at   | -0.04909901 | -1.83301643 | 0.07188427  | 0.169095837 |
| 236226_at   | 0.023271464 | 0.730135982 | 0.468217644 | 0.645247619 |
| 236227_at   | -0.04278133 | -0.96163723 | 0.340185492 | 0.523034608 |
| 236228_at   | -0.01593433 | -0.45813225 | 0.648552804 | 0.78686573  |
| 236229_at   | 0.132223113 | 1.958349455 | 0.05495735  | 0.137407211 |
| 236230_at   | -0.00194132 | -0.06348072 | 0.949599883 | 0.974143093 |
| 236231_at   | -0.06402189 | -1.76208336 | 0.083273562 | 0.189253092 |
| 236232_at   | 0.045028128 | 1.241960831 | 0.219201588 | 0.386025588 |
| 236233_at   | -0.12649301 | -3.20338632 | 0.002198093 | 0.009872093 |
| 236234_at   | -0.00432414 | -0.03784684 | 0.96993851  | 0.984879627 |
| 236235_at   | -0.11494738 | -2.06268628 | 0.043586188 | 0.114531628 |
| 236236_at   | -0.16015898 | -4.48587037 | 3.45E-05    | 0.000301924 |
| 236237_at   | 0.285835507 | 3.914875052 | 0.000238511 | 0.001532215 |
| 236238_at   | -0.02122116 | -0.61390771 | 0.541653661 | 0.706728912 |
| 236239_at   | 0.018646606 | 0.470797527 | 0.639534154 | 0.780845274 |
| 236240_at   | 0.007745577 | 0.186274923 | 0.852872888 | 0.919291781 |
| 236241_at   | -0.02608369 | -0.51763242 | 0.606664541 | 0.756439239 |
| 236242_at   | -0.08127549 | -1.81259084 | 0.075021327 | 0.174665347 |
| 236243_at   | 0.145563995 | 3.470188046 | 0.000982772 | 0.005024254 |
| 236244_at   | -0.12017339 | -2.22489011 | 0.029954419 | 0.085030672 |
| 236245_at   | 0.014159394 | 0.402290998 | 0.688934405 | 0.81466767  |
| 236246_x_at | 0.046694534 | 1.116860497 | 0.268615047 | 0.444101201 |
| 236247_at   | 0.019974859 | 0.552388212 | 0.582784484 | 0.738638512 |
| 236248_x_at | -0.0724144  | -1.78221412 | 0.079898193 | 0.183514361 |
| 236249_at   | 0.03224728  | 1.157467941 | 0.251780084 | 0.424638268 |
| 236250_at   | 0.183921556 | 4.454512742 | 3.84E-05    | 0.000331668 |
| 236251_at   | 0.112138237 | 1.747001705 | 0.085879268 | 0.193961808 |
| 236252_at   | -0.08447696 | -2.21531321 | 0.030640135 | 0.086553878 |
| 236253_at   | -0.19505589 | -6.01917186 | 1.23E-07    | 2.97E-06    |
| 236254_at   | 0.161625202 | 2.825968514 | 0.006437461 | 0.024284882 |
| 236255_at   | -0.00202843 | -0.05318202 | 0.957767874 | 0.978389984 |
| 236256_at   | 0.02558695  | 1.064813242 | 0.291330868 | 0.469711955 |
| 236257_at   | 0.009749103 | 0.237665336 | 0.812970156 | 0.894952022 |
| 236258_at   | 0.022247528 | 0.554362043 | 0.581441901 | 0.73754155  |
| 236259_at   | 0.061331335 | 1.680216962 | 0.098242118 | 0.21466957  |
| 236260_at   | -0.06967604 | -2.18347357 | 0.033020271 | 0.091975191 |
| 236261_at   | -0.10848355 | -3.00608803 | 0.003892799 | 0.016034744 |
| 236262_at   | 0.103425289 | 2.295926945 | 0.025277113 | 0.074350712 |
| 236263_at   | 0.056852118 | 1.896736831 | 0.062797771 | 0.152430913 |
| 236264_at   | -0.35908261 | -4.35184801 | 5.48E-05    | 0.000445219 |
| 236265_at   | 0.157284867 | 3.822184391 | 0.000322685 | 0.001978791 |
| 236266_at   | 0.051996521 | 1.533573317 | 0.13051935  | 0.266002591 |
| 236267_at   | 0.051421739 | 1.315812731 | 0.193364366 | 0.353276113 |
| 236268_at   | 0.155008644 | 2.574224864 | 0.012596373 | 0.042113271 |
| 236269_at   | -0.02545113 | -0.75636988 | 0.452459329 | 0.631799534 |
| 236270_at   | 0.148531685 | 2.780140342 | 0.007294669 | 0.026932123 |
| 236271_at   | -0.04537476 | -1.08205086 | 0.283665128 | 0.461094678 |
| 236272_at   | 0.014637867 | 0.497529288 | 0.620678752 | 0.767149943 |
| 236273_at   | 0.178503634 | 2.291751461 | 0.025532967 | 0.074965141 |
| 236274_at   | 0.165598089 | 4.300542158 | 6.54E-05    | 0.00051488  |
| 236275_at   | -0.01968054 | -0.80139544 | 0.426142261 | 0.607442666 |
| 236276_at   | -0.0195964  | -0.74311754 | 0.460381121 | 0.638886914 |
| 236277_at   | -0.56411122 | -5.24714844 | 2.23E-06    | 3.10E-05    |
| 236278_at   | -0.0081446  | -0.14967212 | 0.881537543 | 0.93663495  |
| 236279_at   | -0.02943195 | -1.01141202 | 0.315979684 | 0.49723366  |
| 236280_at   | -0.01057732 | -0.31016308 | 0.757537987 | 0.860617737 |
| 236281_x_at | -0.00888694 | -0.30222696 | 0.763549778 | 0.863978699 |
| 236282_at   | -0.00277103 | -0.08016628 | 0.936378321 | 0.966948115 |
| 236283_x_at | 0.240781133 | 4.419344212 | 4.34E-05    | 0.000366061 |
| 236284_at   | -0.02633605 | -0.90391368 | 0.369744339 | 0.552972677 |
| 236285_at   | 0.018407328 | 0.523038154 | 0.602921002 | 0.753811487 |
| 236286_at   | 0.039316209 | 1.079487405 | 0.28479617  | 0.462413747 |
| 236287_at   | 0.037036515 | 1.071493446 | 0.288343323 | 0.466484698 |
| 236288_at   | -0.10423525 | -2.53610945 | 0.013897243 | 0.045622711 |
| 236289_at   | -0.38030306 | -4.76375896 | 1.29E-05    | 0.000132017 |
| 236290_at   | -0.5572741  | -6.49043292 | 2.02E-08    | 7.42E-07    |
| 236291_at   | 0.101477454 | 3.238655141 | 0.001980296 | 0.009034648 |
| 236292_at   | 0.18515929  | 5.218188703 | 2.49E-06    | 3.39E-05    |
| 236293_at   | 0.023541271 | 0.689463024 | 0.493254713 | 0.666954792 |
| 236294_at   | -0.37063075 | -3.84217955 | 0.000302407 | 0.001876068 |
| 236295_s_at | 0.019303634 | 0.546603711 | 0.586727576 | 0.741720047 |

|             |             |             |             |             |
|-------------|-------------|-------------|-------------|-------------|
| 236296_x_at | -0.00493892 | -0.14663498 | 0.883923733 | 0.937990838 |
| 236297_at   | 0.261783465 | 3.32348085  | 0.00153675  | 0.007309541 |
| 236298_at   | 0.006924526 | 0.218861237 | 0.827519062 | 0.904330055 |
| 236299_at   | -0.04242033 | -0.93573223 | 0.353253545 | 0.536427828 |
| 236300_at   | 0.063667959 | 1.204966803 | 0.233062612 | 0.401740129 |
| 236301_at   | -0.00176734 | -0.05665156 | 0.955015596 | 0.976828787 |
| 236302_at   | 0.064399928 | 0.893397473 | 0.375300887 | 0.558316599 |
| 236303_at   | -0.14478637 | -3.87677798 | 0.000270178 | 0.001700194 |
| 236304_at   | 0.002631096 | 0.083086254 | 0.934066288 | 0.965731266 |
| 236305_at   | -0.07049748 | -2.16429669 | 0.034530866 | 0.095256679 |
| 236306_at   | -0.04758392 | -1.45133274 | 0.152022951 | 0.297092505 |
| 236307_at   | 0.078315012 | 1.815999213 | 0.074490017 | 0.173707687 |
| 236308_at   | -0.92769408 | -5.00904191 | 5.34E-06    | 6.36E-05    |
| 236309_x_at | 0.001652331 | 0.055010951 | 0.956316974 | 0.977559683 |
| 236310_at   | -0.21106625 | -4.05314255 | 0.000150967 | 0.001039125 |
| 236311_at   | 0.236407246 | 4.075273206 | 0.000140214 | 0.00097913  |
| 236312_at   | -0.13279968 | -4.37698425 | 5.03E-05    | 0.000413675 |
| 236313_at   | 0.206514102 | 2.948474007 | 0.00458146  | 0.018361939 |
| 236314_at   | 0.200777325 | 3.890616644 | 0.000258234 | 0.001637947 |
| 236315_at   | -0.07024111 | -1.65278624 | 0.103725918 | 0.223850438 |
| 236316_at   | 0.01209166  | 0.613358237 | 0.542014356 | 0.706974759 |
| 236317_at   | 0.070954224 | 2.051759032 | 0.044672957 | 0.116844607 |
| 236318_x_at | -0.0046033  | -0.12024885 | 0.904697594 | 0.949437489 |
| 236319_at   | 0.060335214 | 1.325647557 | 0.190104226 | 0.348888717 |
| 236320_at   | -0.03858905 | -0.97540237 | 0.333372474 | 0.516085326 |
| 236321_at   | -0.34442468 | -4.18506653 | 9.69E-05    | 0.000717217 |
| 236322_at   | -0.02489805 | -0.48060763 | 0.632585877 | 0.775837761 |
| 236323_at   | -0.01085185 | -0.32939397 | 0.743033075 | 0.851106805 |
| 236324_at   | -0.03741517 | -0.38530938 | 0.701404118 | 0.823646255 |
| 236325_at   | -0.08351835 | -1.41177437 | 0.163307533 | 0.313013692 |
| 236326_at   | -0.00014241 | -0.00388147 | 0.996916235 | 0.998582476 |
| 236327_at   | 0.187499019 | 3.820538261 | 0.000324411 | 0.001987741 |
| 236328_at   | 0.046161689 | 1.476385044 | 0.145197469 | 0.287407796 |
| 236329_at   | -0.31208036 | -6.27034959 | 4.70E-08    | 1.40E-06    |
| 236330_at   | 0.006645809 | 0.127590839 | 0.898909871 | 0.945982552 |
| 236331_at   | -0.30447689 | -4.84585139 | 9.63E-06    | 0.000103576 |
| 236332_at   | -0.08410277 | -2.79599166 | 0.006986946 | 0.026004381 |
| 236333_at   | -0.59330937 | -5.86596154 | 2.20E-07    | 4.64E-06    |
| 236334_at   | 0.044855704 | 1.284629849 | 0.203979626 | 0.366984318 |
| 236335_at   | -1.25670574 | -7.5726784  | 3.02E-10    | 4.27E-08    |
| 236336_at   | -0.21633808 | -3.56407351 | 0.000734245 | 0.003951219 |
| 236337_at   | -0.06466047 | -2.14720761 | 0.03592768  | 0.098263646 |
| 236338_at   | 0.200197571 | 3.373325529 | 0.001321769 | 0.006444742 |
| 236339_at   | 0.0557981   | 1.714825075 | 0.091664719 | 0.203784491 |
| 236340_at   | -0.04621304 | -0.82810473 | 0.41097309  | 0.593225015 |
| 236341_at   | 0.008732661 | 0.285043389 | 0.776616486 | 0.871981956 |
| 236342_at   | 0.005152747 | 0.10862179  | 0.913873777 | 0.954246988 |
| 236343_at   | -0.00809961 | -0.24078592 | 0.810561977 | 0.893665776 |
| 236344_at   | 0.235841516 | 3.577120217 | 0.000704863 | 0.003815154 |
| 236345_at   | -0.03903928 | -0.96067358 | 0.340665855 | 0.523557029 |
| 236346_at   | 0.011392669 | 0.248248479 | 0.804810555 | 0.890061473 |
| 236347_at   | -0.1147466  | -3.39665338 | 0.001231236 | 0.006068197 |
| 236348_at   | 0.044057945 | 1.471045935 | 0.146631553 | 0.289403699 |
| 236349_at   | 0.02149528  | 0.595899191 | 0.55353867  | 0.715944615 |
| 236350_at   | -0.01075296 | -0.26271535 | 0.793691957 | 0.882549964 |
| 236351_at   | -0.14019209 | -3.21105181 | 0.002148923 | 0.00968131  |
| 236352_at   | 0.004513202 | 0.12148172  | 0.903725349 | 0.948966212 |
| 236353_at   | -0.03930389 | -0.68342    | 0.497036434 | 0.670138059 |
| 236354_at   | -0.00560221 | -0.14935626 | 0.881785656 | 0.936764947 |
| 236355_s_at | 0.271500561 | 3.429067225 | 0.001115149 | 0.00557846  |
| 236356_at   | -0.21661111 | -3.14515878 | 0.002607609 | 0.011399712 |
| 236357_at   | -0.0015716  | -0.04693489 | 0.962724799 | 0.980994217 |
| 236358_at   | 0.032040278 | 0.637183336 | 0.5264885   | 0.694772176 |
| 236359_at   | -1.49146645 | -7.98055656 | 6.19E-11    | 1.62E-08    |
| 236360_at   | 0.129289553 | 1.586228304 | 0.118072575 | 0.246675913 |
| 236361_at   | 0.393674657 | 3.419792567 | 0.00114726  | 0.005710997 |
| 236362_at   | -0.01203811 | -0.18647167 | 0.852719312 | 0.919170582 |
| 236363_at   | -0.03671704 | -1.09357784 | 0.278617807 | 0.455466075 |
| 236364_at   | -0.05082489 | -1.51409498 | 0.135380199 | 0.273230304 |
| 236365_at   | -0.04961345 | -1.77148022 | 0.081683502 | 0.186595036 |
| 236366_at   | 0.035947162 | 0.902763642 | 0.370349428 | 0.553622659 |
| 236367_at   | 0.087765229 | 2.526447223 | 0.014245789 | 0.046516608 |
| 236368_at   | 0.088379652 | 1.725312718 | 0.089744691 | 0.200543486 |
| 236369_at   | -0.0388042  | -1.34171532 | 0.184867539 | 0.342245928 |
| 236370_at   | 0.163572424 | 3.521795591 | 0.000837682 | 0.004397308 |

|             |             |             |             |             |
|-------------|-------------|-------------|-------------|-------------|
| 236371_s_at | -0.101295   | -2.70664111 | 0.008891112 | 0.031705225 |
| 236372_at   | -0.12324316 | -2.74561287 | 0.008008579 | 0.029125186 |
| 236373_at   | 0.108021284 | 2.140397582 | 0.036497937 | 0.099498092 |
| 236374_at   | -0.03707075 | -0.89384893 | 0.375061264 | 0.558209773 |
| 236375_at   | 0.023802143 | 0.670506153 | 0.50517075  | 0.676933652 |
| 236376_at   | -0.17891892 | -4.84044457 | 9.82E-06    | 0.000105278 |
| 236377_at   | -0.32528172 | -5.171115   | 2.96E-06    | 3.90E-05    |
| 236378_at   | -0.09306984 | -2.04185992 | 0.045677635 | 0.118908717 |
| 236379_at   | -0.34647517 | -6.34523503 | 3.53E-08    | 1.13E-06    |
| 236380_at   | -0.07854841 | -2.15370186 | 0.035391139 | 0.097108349 |
| 236381_s_at | 0.117783754 | 2.583574699 | 0.012294634 | 0.041282629 |
| 236382_at   | 0.118490739 | 2.975759002 | 0.004242306 | 0.017222012 |
| 236383_at   | -0.02599777 | -0.6175527  | 0.539264087 | 0.705134456 |
| 236384_at   | 0.049159942 | 1.563074906 | 0.123422828 | 0.254981419 |
| 236385_at   | -0.06299975 | -2.14720141 | 0.035928195 | 0.098263646 |
| 236386_at   | -0.03121931 | -0.47249343 | 0.638330641 | 0.779951144 |
| 236387_at   | 0.003127964 | 0.083128909 | 0.934032519 | 0.965731266 |
| 236388_at   | -0.37582004 | -4.99022772 | 5.72E-06    | 6.72E-05    |
| 236389_x_at | -0.07375292 | -2.44230254 | 0.017631842 | 0.055598834 |
| 236390_at   | 0.050185572 | 1.362694031 | 0.178196037 | 0.333665882 |
| 236391_at   | -0.11367409 | -3.03396281 | 0.003595412 | 0.014971224 |
| 236392_at   | 0.015795796 | 0.535877087 | 0.594072911 | 0.747201378 |
| 236393_at   | -0.09457075 | -2.91401186 | 0.005045824 | 0.019865043 |
| 236394_at   | -0.01643532 | -0.38201552 | 0.703832532 | 0.825391852 |
| 236395_at   | 0.09726448  | 2.603687601 | 0.011667693 | 0.039548639 |
| 236396_at   | 0.088875601 | 1.924644082 | 0.059136034 | 0.145310515 |
| 236397_at   | -0.00841734 | -0.22559635 | 0.822300774 | 0.901251124 |
| 236398_s_at | 0.068160573 | 2.019717025 | 0.047995867 | 0.12351902  |
| 236399_at   | 0.032194018 | 1.062980633 | 0.292154172 | 0.470605668 |
| 236400_at   | 0.012183957 | 0.281051068 | 0.779661783 | 0.874000311 |
| 236401_at   | 0.014809799 | 0.44667026  | 0.656760509 | 0.792246502 |
| 236402_at   | -0.05717268 | -1.38553417 | 0.171143282 | 0.324030315 |
| 236403_at   | -0.00557359 | -0.16774397 | 0.867362605 | 0.928239531 |
| 236404_at   | 0.09231396  | 1.348323165 | 0.182746004 | 0.339581906 |
| 236405_at   | -0.08458733 | -3.04349124 | 0.003498714 | 0.014636762 |
| 236406_at   | 0.086004304 | 3.238866812 | 0.001979053 | 0.009029896 |
| 236407_at   | 0.066093296 | 1.342266171 | 0.184689969 | 0.342071067 |
| 236408_at   | 0.016192224 | 0.507036559 | 0.614033039 | 0.762160879 |
| 236409_at   | 0.073103055 | 2.263673784 | 0.027313905 | 0.078959445 |
| 236410_x_at | 0.002790745 | 0.08289455  | 0.934218063 | 0.965790142 |
| 236411_at   | 0.17062692  | 2.277517685 | 0.026422501 | 0.077043575 |
| 236412_at   | -0.03504933 | -1.10435642 | 0.273955201 | 0.45018222  |
| 236413_at   | -0.02868093 | -0.95514032 | 0.343432699 | 0.526373964 |
| 236414_at   | 0.08120619  | 2.104829423 | 0.039606647 | 0.106070247 |
| 236415_at   | -0.08110627 | -1.94724797 | 0.056304899 | 0.140001031 |
| 236416_at   | 0.003437529 | 0.149034692 | 0.882038263 | 0.93689968  |
| 236417_at   | 0.299522997 | 4.404891121 | 4.57E-05    | 0.000381611 |
| 236418_at   | -0.0164186  | -0.47121617 | 0.639236971 | 0.780649741 |
| 236419_at   | 0.002463543 | 0.075958345 | 0.93971112  | 0.968462955 |
| 236420_s_at | 0.158143784 | 1.431135711 | 0.157705975 | 0.305050657 |
| 236421_at   | 0.036169436 | 0.666385393 | 0.507781442 | 0.678945945 |
| 236422_at   | -0.02914303 | -0.80526775 | 0.423922484 | 0.605495164 |
| 236423_at   | 0.098337379 | 2.997566889 | 0.003988185 | 0.016358293 |
| 236424_at   | -0.03874701 | -1.23522929 | 0.221677558 | 0.388640099 |
| 236425_at   | -0.04611965 | -1.32683712 | 0.18971273  | 0.348404262 |
| 236426_at   | -0.01545739 | -0.46001326 | 0.647209993 | 0.786008397 |
| 236427_at   | 0.116969578 | 2.858943424 | 0.005879256 | 0.022505843 |
| 236428_at   | 0.308896889 | 6.623977781 | 1.20E-08    | 5.15E-07    |
| 236429_at   | 0.09769132  | 1.363109142 | 0.178065905 | 0.333492077 |
| 236430_at   | 0.007012771 | 0.245502151 | 0.806925918 | 0.891358846 |
| 236431_at   | 0.009778876 | 0.331206743 | 0.741670511 | 0.850156158 |
| 236432_at   | -0.04226165 | -1.41310379 | 0.162918053 | 0.312374347 |
| 236433_at   | 0.06434109  | 1.673268332 | 0.099608286 | 0.21699216  |
| 236434_at   | 0.030815926 | 0.818832052 | 0.416201738 | 0.598538972 |
| 236435_at   | 0.159990888 | 4.798538568 | 1.14E-05    | 0.000119032 |
| 236436_at   | 0.016970368 | 0.549599531 | 0.584683847 | 0.740245827 |
| 236437_at   | -0.05167468 | -1.05859982 | 0.294128756 | 0.47278098  |
| 236438_at   | 0.056670563 | 1.859360911 | 0.068001604 | 0.162173302 |
| 236439_at   | 0.438984055 | 2.892042738 | 0.00536424  | 0.020881335 |
| 236440_at   | -0.48500371 | -8.1254831  | 3.53E-11    | 1.20E-08    |
| 236441_at   | -0.01327536 | -0.40609934 | 0.686149627 | 0.81254428  |
| 236442_at   | 0.182034864 | 6.202889967 | 6.09E-08    | 1.72E-06    |
| 236443_at   | -0.00971957 | -0.37072641 | 0.712178876 | 0.830949727 |
| 236444_x_at | -0.02392593 | -0.56541146 | 0.573953716 | 0.731822967 |
| 236445_at   | -0.0471287  | -1.41480432 | 0.162420897 | 0.311728709 |

|             |             |             |             |             |
|-------------|-------------|-------------|-------------|-------------|
| 236446_at   | 0.177770256 | 3.822591905 | 0.000322259 | 0.001976993 |
| 236447_at   | -0.0218896  | -0.53606867 | 0.59394134  | 0.747113113 |
| 236448_at   | -0.58313221 | -6.41165788 | 2.73E-08    | 9.26E-07    |
| 236449_at   | 0.067221748 | 2.013288888 | 0.048687569 | 0.12488205  |
| 236450_at   | 0.111134227 | 2.113816834 | 0.038800111 | 0.104304033 |
| 236451_at   | 0.021487793 | 1.204777132 | 0.233135286 | 0.40180796  |
| 236452_at   | -0.04873895 | -1.38423393 | 0.171538939 | 0.324531949 |
| 236453_at   | -0.36789222 | -6.37798415 | 3.11E-08    | 1.02E-06    |
| 236454_at   | -0.09813205 | -2.96627877 | 0.004357406 | 0.01760992  |
| 236455_at   | -0.01665013 | -0.52087191 | 0.604419875 | 0.754798621 |
| 236456_at   | -1.16800748 | -6.28325727 | 4.47E-08    | 1.35E-06    |
| 236457_at   | 0.056666326 | 1.031533229 | 0.306531941 | 0.486690995 |
| 236458_at   | -0.00407887 | -0.10458946 | 0.917058948 | 0.955974545 |
| 236459_at   | -0.01797666 | -0.46215475 | 0.645682657 | 0.785049494 |
| 236460_at   | 0.055878406 | 1.572387953 | 0.121247885 | 0.251511277 |
| 236461_at   | -0.03618612 | -0.84960312 | 0.39900552  | 0.581369762 |
| 236462_at   | -0.17638274 | -4.17201821 | 0.000101286 | 0.000745011 |
| 236463_at   | 0.031275646 | 0.964960705 | 0.338532221 | 0.521245849 |
| 236464_at   | -0.04446786 | -1.38335373 | 0.171807178 | 0.324884092 |
| 236465_at   | -0.63381192 | -6.21235147 | 5.87E-08    | 1.67E-06    |
| 236466_at   | -0.02260412 | -0.62020098 | 0.537531333 | 0.703531761 |
| 236467_at   | -0.0076908  | -0.19509363 | 0.845994894 | 0.915410595 |
| 236468_at   | -0.39934654 | -4.93063816 | 7.10E-06    | 8.07E-05    |
| 236469_at   | 0.001313346 | 0.047146353 | 0.962556986 | 0.980972723 |
| 236470_at   | -0.00031546 | -0.00749732 | 0.994043538 | 0.997248681 |
| 236471_at   | -0.04923032 | -2.00490258 | 0.049602874 | 0.126690819 |
| 236472_at   | 0.419476877 | 6.1701162   | 6.91E-08    | 1.89E-06    |
| 236473_at   | 0.007730798 | 0.209939766 | 0.834443319 | 0.908763819 |
| 236474_at   | 0.175151818 | 3.735182513 | 0.000427129 | 0.002504496 |
| 236475_at   | -0.08074314 | -1.73018218 | 0.088864568 | 0.199004624 |
| 236476_at   | -0.07793519 | -2.03469001 | 0.04641746  | 0.120378874 |
| 236477_at   | 0.009446329 | 0.339860792 | 0.735177235 | 0.845945152 |
| 236478_at   | 0.046797142 | 1.38607986  | 0.170977439 | 0.323826067 |
| 236479_at   | 0.04729365  | 0.874697907 | 0.38531128  | 0.567934162 |
| 236480_at   | -0.02391309 | -0.68263855 | 0.497526617 | 0.670662517 |
| 236481_at   | 0.016937093 | 0.418035766 | 0.677449782 | 0.806536819 |
| 236482_at   | -0.04030186 | -1.06388646 | 0.291747026 | 0.470187086 |
| 236483_at   | 0.017265022 | 0.478041083 | 0.63440053  | 0.777104553 |
| 236484_at   | 0.207057678 | 4.718378409 | 1.52E-05    | 0.000151551 |
| 236485_at   | -0.01464752 | -0.42313513 | 0.673746445 | 0.803862356 |
| 236486_at   | -0.00062616 | -0.02021591 | 0.983939853 | 0.992153782 |
| 236487_at   | -0.13233136 | -2.17420038 | 0.033743337 | 0.09354033  |
| 236488_s_at | 0.183529873 | 1.574887824 | 0.120669337 | 0.250625244 |
| 236489_at   | -0.01515918 | -0.49730078 | 0.620838874 | 0.767227748 |
| 236490_at   | -0.00461698 | -0.14196601 | 0.887594099 | 0.939585388 |
| 236491_at   | -0.13965541 | -4.09070375 | 0.000133157 | 0.000938655 |
| 236492_at   | 0.056845284 | 1.016095754 | 0.313763149 | 0.494843061 |
| 236493_at   | 0.070390828 | 1.617507311 | 0.111142775 | 0.235724796 |
| 236494_x_at | 0.270062874 | 4.918254302 | 7.42E-06    | 8.37E-05    |
| 236495_at   | 0.180569525 | 2.817921027 | 0.006580921 | 0.024738373 |
| 236496_at   | -0.02222892 | -0.52131698 | 0.60411178  | 0.754677295 |
| 236497_at   | -0.04865688 | -1.38250248 | 0.1720669   | 0.325244353 |
| 236498_s_at | -0.0445557  | -1.21183743 | 0.230441184 | 0.398532521 |
| 236499_at   | 0.02867971  | 0.887473888 | 0.378453967 | 0.561024178 |
| 236500_at   | 0.171989813 | 3.597432309 | 0.000661338 | 0.003621681 |
| 236501_at   | -0.03483404 | -0.9291442  | 0.356628223 | 0.539759456 |
| 236502_at   | -0.00430413 | -0.2132527  | 0.831870473 | 0.907144808 |
| 236503_at   | -0.1033953  | -3.31460626 | 0.001578335 | 0.007474724 |
| 236504_x_at | 0.01324181  | 0.356135197 | 0.723019052 | 0.838099194 |
| 236505_at   | -0.00116973 | -0.03895376 | 0.96905974  | 0.984367523 |
| 236506_at   | -0.03143472 | -1.1979702  | 0.235754329 | 0.404838718 |
| 236507_at   | -0.01330568 | -0.37359681 | 0.710053306 | 0.829660968 |
| 236508_at   | 0.015335139 | 0.496495043 | 0.621403636 | 0.767482091 |
| 236509_at   | 0.016778695 | 0.516323341 | 0.607572693 | 0.757212459 |
| 236510_at   | -0.06330696 | -1.64481387 | 0.105365716 | 0.226514307 |
| 236511_at   | 0.174181997 | 2.889395835 | 0.005403835 | 0.021000713 |
| 236512_at   | -0.03959566 | -1.08962213 | 0.280342784 | 0.457562953 |
| 236513_at   | -0.00197163 | -0.06744368 | 0.946458217 | 0.972391833 |
| 236514_at   | -0.05825198 | -1.74713719 | 0.085855562 | 0.193927867 |
| 236515_at   | -0.04957467 | -1.38520136 | 0.171244488 | 0.324130235 |
| 236516_at   | -0.03337916 | -1.14963039 | 0.254969196 | 0.428225604 |
| 236517_at   | 0.189382456 | 2.43930685  | 0.017764746 | 0.055931104 |
| 236518_at   | 0.025320757 | 1.142889442 | 0.257735059 | 0.431492612 |
| 236519_at   | 0.158678508 | 2.714925652 | 0.008696366 | 0.031144964 |
| 236520_at   | 0.050354925 | 1.181133356 | 0.242324064 | 0.412883991 |

|             |             |             |             |             |
|-------------|-------------|-------------|-------------|-------------|
| 236521_at   | 0.058176383 | 1.957273319 | 0.055086758 | 0.137638362 |
| 236522_at   | 0.262343306 | 4.942098785 | 6.81E-06    | 7.79E-05    |
| 236523_at   | -0.40712627 | -4.91706618 | 7.45E-06    | 8.39E-05    |
| 236524_at   | 0.486461048 | 5.399415506 | 1.27E-06    | 1.94E-05    |
| 236525_at   | 0.029281448 | 0.67995603  | 0.499211308 | 0.672030838 |
| 236526_x_at | -0.06788919 | -2.12039999 | 0.03821845  | 0.10313743  |
| 236527_at   | 0.095976071 | 2.40604711  | 0.019301942 | 0.059893245 |
| 236528_at   | 0.071538598 | 2.228695124 | 0.029685755 | 0.084375207 |
| 236529_at   | -0.03902802 | -0.82097528 | 0.414989654 | 0.597221627 |
| 236530_at   | -0.01638052 | -0.71013715 | 0.480437244 | 0.655664509 |
| 236531_at   | -0.04048679 | -1.33693807 | 0.18641294  | 0.344191991 |
| 236532_at   | -0.67502158 | -5.41617321 | 1.19E-06    | 1.84E-05    |
| 236533_at   | 0.037906299 | 0.937232576 | 0.352487904 | 0.535697179 |
| 236534_at   | 0.063670361 | 2.027743118 | 0.04714412  | 0.121796926 |
| 236535_at   | 0.029692041 | 0.848507136 | 0.399610373 | 0.581928536 |
| 236536_at   | -0.13595648 | -3.76826887 | 0.000384073 | 0.002290496 |
| 236537_at   | -0.08925305 | -2.54927629 | 0.013434705 | 0.044396913 |
| 236538_at   | -0.99470741 | -5.95571776 | 1.57E-07    | 3.57E-06    |
| 236539_at   | -0.04613297 | -2.19885166 | 0.031851145 | 0.089342331 |
| 236540_at   | -0.15827388 | -4.23632986 | 8.14E-05    | 0.000619624 |
| 236541_at   | 0.093997519 | 2.641674702 | 0.010562347 | 0.036446294 |
| 236542_at   | 0.077052184 | 1.485633754 | 0.142739371 | 0.283928608 |
| 236543_at   | -0.0023477  | -0.08121117 | 0.935550911 | 0.966542022 |
| 236544_at   | 0.016837724 | 0.586486176 | 0.559802683 | 0.721382538 |
| 236545_at   | -0.51981913 | -6.11204337 | 8.62E-08    | 2.25E-06    |
| 236546_at   | -0.00852217 | -0.2697733  | 0.788282943 | 0.879166034 |
| 236547_at   | -0.06783494 | -1.41348791 | 0.162805651 | 0.312252603 |
| 236548_at   | 0.019975928 | 0.716302304 | 0.476651338 | 0.652390335 |
| 236549_x_at | 0.039159217 | 1.066336114 | 0.290647932 | 0.46899077  |
| 236550_s_at | 0.041296309 | 1.777571317 | 0.080666373 | 0.184870481 |
| 236551_at   | 0.014801621 | 0.500223489 | 0.618792209 | 0.766000525 |
| 236552_at   | 0.066848767 | 1.306618002 | 0.196450256 | 0.357218812 |
| 236553_at   | 0.14449015  | 2.086846982 | 0.041264312 | 0.109570711 |
| 236554_x_at | -0.03774263 | -0.84059339 | 0.403994583 | 0.586326099 |
| 236555_at   | 0.075323439 | 2.145514328 | 0.036068739 | 0.098574211 |
| 236556_s_at | -0.0023861  | -0.06501498 | 0.948383487 | 0.973543303 |
| 236557_at   | -0.00830463 | -0.26228489 | 0.794022181 | 0.882835091 |
| 236558_at   | 0.209823772 | 2.750793856 | 0.007897512 | 0.028777465 |
| 236559_at   | -0.03938517 | -1.34226542 | 0.184690209 | 0.342071067 |
| 236560_at   | -0.01736938 | -0.52347456 | 0.602619249 | 0.753581787 |
| 236561_at   | 0.388657174 | 4.791912542 | 1.17E-05    | 0.000121407 |
| 236562_at   | 0.00405462  | 0.110995212 | 0.911999653 | 0.953473577 |
| 236563_at   | 0.042844661 | 1.096633658 | 0.277290327 | 0.453877062 |
| 236564_at   | -0.07970752 | -2.04953889 | 0.044896605 | 0.117276999 |
| 236565_s_at | 0.024192965 | 0.146418933 | 0.884093515 | 0.938012663 |
| 236566_at   | 0.018487699 | 0.624554846 | 0.53468888  | 0.701244694 |
| 236567_at   | -0.06194111 | -1.79039815 | 0.078558949 | 0.180989606 |
| 236568_at   | -0.10299555 | -2.68338352 | 0.009459377 | 0.03335959  |
| 236569_at   | -0.03830208 | -1.50483104 | 0.137741834 | 0.276710323 |
| 236570_at   | 0.03665124  | 1.086295132 | 0.281799348 | 0.459021629 |
| 236571_at   | 0.227586124 | 3.140777659 | 0.002641153 | 0.011529442 |
| 236572_at   | -0.07301381 | -2.2404354  | 0.028870147 | 0.082595701 |
| 236573_at   | -0.03904167 | -1.32838982 | 0.18920264  | 0.347748166 |
| 236574_at   | -0.02542709 | -0.7859927  | 0.435040375 | 0.615707911 |
| 236575_at   | 0.23387096  | 2.936386291 | 0.00473962  | 0.018874016 |
| 236576_at   | 0.478227804 | 3.835896892 | 0.000308643 | 0.00190734  |
| 236577_at   | -0.03753821 | -1.34540427 | 0.18368086  | 0.340823145 |
| 236578_at   | 0.091445325 | 2.950280545 | 0.004558248 | 0.018290287 |
| 236579_at   | 0.037978004 | 0.856642    | 0.395134388 | 0.577763654 |
| 236580_at   | -0.06938258 | -2.35239435 | 0.022033985 | 0.066622207 |
| 236581_at   | 0.025664286 | 0.737037408 | 0.464042086 | 0.641775302 |
| 236582_at   | -0.07352188 | -2.32169866 | 0.023747729 | 0.070826394 |
| 236583_at   | 0.049536337 | 1.262770116 | 0.211676492 | 0.376662119 |
| 236584_at   | 0.011683449 | 0.309519287 | 0.758025119 | 0.860909725 |
| 236585_at   | -0.05204877 | -1.72443904 | 0.089903362 | 0.200727434 |
| 236586_at   | -0.01378779 | -0.48317397 | 0.630773645 | 0.774443992 |
| 236587_at   | -0.09062736 | -1.77343214 | 0.081356403 | 0.186090766 |
| 236588_at   | -0.01890333 | -0.58571708 | 0.560316041 | 0.721786029 |
| 236589_at   | -0.02527666 | -0.74450927 | 0.459545469 | 0.638051515 |
| 236590_at   | 0.081309763 | 3.299019475 | 0.001653956 | 0.007780087 |
| 236591_at   | -0.18933016 | -3.58876628 | 0.000679584 | 0.003704353 |
| 236592_at   | 0.057118821 | 1.59012854  | 0.117189952 | 0.245279509 |
| 236593_at   | -0.08080926 | -2.46210161 | 0.01677571  | 0.053358482 |
| 236594_at   | 0.44220337  | 6.739475533 | 7.69E-09    | 3.70E-07    |
| 236595_at   | -0.05372653 | -1.70602752 | 0.093301335 | 0.206539366 |

|             |             |             |             |             |
|-------------|-------------|-------------|-------------|-------------|
| 236596_at   | 0.047173061 | 1.854631602 | 0.068685295 | 0.163367919 |
| 236597_at   | 0.020954705 | 0.691211662 | 0.492163372 | 0.666053943 |
| 236598_at   | 0.014528843 | 0.376382841 | 0.707992427 | 0.827967924 |
| 236599_at   | 0.152982406 | 3.668596464 | 0.000528198 | 0.003001427 |
| 236600_at   | 0.345253557 | 4.935767418 | 6.97E-06    | 7.95E-05    |
| 236601_at   | -0.11399533 | -2.67719357 | 0.009616119 | 0.033803378 |
| 236602_at   | 0.061736034 | 1.75318458  | 0.084802971 | 0.192064784 |
| 236603_at   | -0.12254249 | -3.27413316 | 0.001781821 | 0.008280455 |
| 236604_at   | 0.045227238 | 1.29432344  | 0.200634119 | 0.362669005 |
| 236605_at   | 0.049610993 | 1.526298707 | 0.13231824  | 0.268646951 |
| 236606_at   | 0.024367971 | 0.772769592 | 0.442766372 | 0.623012238 |
| 236607_at   | 0.250221289 | 4.078338646 | 0.000138784 | 0.000970965 |
| 236608_at   | -0.01369684 | -0.53220203 | 0.59659939  | 0.74911415  |
| 236609_at   | 0.047638862 | 1.318519327 | 0.192462985 | 0.352060682 |
| 236610_at   | 0.102841937 | 2.178011598 | 0.033444497 | 0.092844411 |
| 236611_at   | -0.00247739 | -0.07646224 | 0.939311965 | 0.968323538 |
| 236612_at   | 0.055697837 | 1.432850849 | 0.157217044 | 0.304413806 |
| 236613_at   | -0.01361781 | -0.3420246  | 0.733556706 | 0.844755503 |
| 236614_at   | -0.00315752 | -0.09992255 | 0.920747078 | 0.958276449 |
| 236615_at   | -0.28129758 | -6.24001551 | 5.28E-08    | 1.53E-06    |
| 236616_at   | -0.04064621 | -1.3443502  | 0.184019344 | 0.341260572 |
| 236617_at   | 0.667681539 | 7.658804284 | 2.16E-10    | 3.40E-08    |
| 236618_at   | 0.037566519 | 1.584991205 | 0.118353644 | 0.247124887 |
| 236619_at   | -0.05627789 | -1.7495727  | 0.08543035  | 0.193162663 |
| 236620_at   | 0.036953517 | 0.55957745  | 0.577901582 | 0.734886257 |
| 236621_at   | 0.20518155  | 2.604378986 | 0.011646668 | 0.039504622 |
| 236622_at   | 0.0305791   | 0.909152698 | 0.36699582  | 0.550192116 |
| 236623_at   | 0.06200022  | 1.812025828 | 0.075109709 | 0.174771714 |
| 236624_at   | -0.04899086 | -1.97432286 | 0.053066876 | 0.133607393 |
| 236625_at   | 0.0771738   | 2.585335244 | 0.012238558 | 0.04113142  |
| 236626_at   | 0.015399154 | 0.566385433 | 0.573295906 | 0.731360164 |
| 236627_at   | 0.019607332 | 0.519474467 | 0.605387702 | 0.755468788 |
| 236628_at   | -0.00248659 | -0.07811754 | 0.938000839 | 0.96750215  |
| 236629_at   | 0.016032262 | 0.514382374 | 0.608920353 | 0.758278816 |
| 236630_at   | 0.029503674 | 0.805137573 | 0.423996993 | 0.605545137 |
| 236631_at   | -0.01541949 | -0.36219366 | 0.718510995 | 0.835241466 |
| 236632_at   | 0.030455884 | 0.790101388 | 0.432656099 | 0.613538088 |
| 236633_at   | -0.0383145  | -1.25709103 | 0.213710916 | 0.379165075 |
| 236634_at   | -0.20315686 | -5.18961553 | 2.76E-06    | 3.69E-05    |
| 236635_at   | -0.34906427 | -5.17468791 | 2.92E-06    | 3.86E-05    |
| 236636_at   | -0.05801221 | -1.11439039 | 0.269664111 | 0.445292018 |
| 236637_at   | -0.05304922 | -2.31968512 | 0.023864185 | 0.071078849 |
| 236638_at   | -0.17774622 | -4.02685695 | 0.000164777 | 0.001117725 |
| 236639_at   | -0.04250276 | -1.17596974 | 0.244365134 | 0.415440027 |
| 236640_at   | -0.43601377 | -5.94004179 | 1.66E-07    | 3.75E-06    |
| 236641_at   | 0.011012625 | 0.384136593 | 0.702268401 | 0.824163105 |
| 236642_at   | -0.00868192 | -0.34314841 | 0.732715532 | 0.844028391 |
| 236643_s_at | 0.030294821 | 0.607135633 | 0.546107639 | 0.710152129 |
| 236644_at   | -0.11520572 | -2.43275987 | 0.018058341 | 0.056742631 |
| 236645_at   | 0.141064003 | 2.946814322 | 0.004602882 | 0.018425416 |
| 236646_at   | -0.09023023 | -3.08447947 | 0.003109784 | 0.013243995 |
| 236647_at   | -0.03763455 | -1.0536738  | 0.296360026 | 0.475358802 |
| 236648_at   | -0.06216042 | -1.83102369 | 0.072185392 | 0.169625613 |
| 236649_at   | 0.08748778  | 1.830017631 | 0.07233782  | 0.169872905 |
| 236650_at   | 0.1017069   | 2.652550934 | 0.010263946 | 0.035598034 |
| 236651_at   | -0.01263561 | -0.49985245 | 0.619051864 | 0.766092537 |
| 236652_at   | -0.04290945 | -1.1881859  | 0.239556258 | 0.409445015 |
| 236653_at   | 0.094020667 | 2.430912641 | 0.018141964 | 0.056954246 |
| 236654_s_at | 0.069572562 | 2.423784583 | 0.018467915 | 0.057748879 |
| 236655_at   | -0.07020801 | -1.29253011 | 0.201249926 | 0.363391245 |
| 236656_s_at | -0.66645008 | -6.86710131 | 4.69E-09    | 2.65E-07    |
| 236657_at   | -0.36389352 | -7.19954033 | 1.29E-09    | 1.11E-07    |
| 236658_at   | 0.064316799 | 1.727885217 | 0.089278836 | 0.199782182 |
| 236659_x_at | 0.052378543 | 1.511948576 | 0.135924502 | 0.273982403 |
| 236660_at   | -0.36382168 | -5.07741112 | 4.17E-06    | 5.18E-05    |
| 236661_at   | 0.039767304 | 1.229813314 | 0.223684514 | 0.390853099 |
| 236662_at   | 0.06628138  | 1.997488011 | 0.050424412 | 0.128320681 |
| 236663_at   | -0.12894439 | -3.09457926 | 0.003020361 | 0.012916081 |
| 236664_at   | 0.126587254 | 4.232219111 | 8.26E-05    | 0.00062757  |
| 236665_at   | 0.009008633 | 0.352271594 | 0.7258991   | 0.839909388 |
| 236666_s_at | -0.62167818 | -7.09756705 | 1.92E-09    | 1.41E-07    |
| 236667_at   | -0.09714902 | -3.55798529 | 0.000748352 | 0.004016494 |
| 236668_at   | 0.048204898 | 1.243546392 | 0.218621368 | 0.385270522 |
| 236669_at   | 0.038632511 | 0.977904472 | 0.332143829 | 0.514689921 |
| 236670_s_at | -0.04420269 | -1.61818634 | 0.110996068 | 0.235491872 |



|             |             |             |             |             |
|-------------|-------------|-------------|-------------|-------------|
| 236671_at   | 0.065663028 | 2.393381006 | 0.01991801  | 0.061387194 |
| 236672_at   | 0.009569298 | 0.240397864 | 0.810861342 | 0.893865674 |
| 236673_at   | 0.012093016 | 0.302827162 | 0.763094591 | 0.863704185 |
| 236674_at   | 0.125262042 | 2.578497514 | 0.012457661 | 0.041726582 |
| 236675_at   | -0.10730301 | -3.05175414 | 0.003416829 | 0.014346575 |
| 236676_at   | -0.03850102 | -1.11085879 | 0.271168997 | 0.447066727 |
| 236677_at   | 0.101938245 | 2.526179912 | 0.014255544 | 0.046537164 |
| 236678_at   | 0.004530325 | 0.158126355 | 0.874901195 | 0.932710371 |
| 236679_x_at | -0.0135495  | -0.28235683 | 0.778665381 | 0.873255708 |
| 236680_at   | 0.000600628 | 0.016875836 | 0.98659303  | 0.993439507 |
| 236681_at   | 0.056417867 | 1.672160378 | 0.09982755  | 0.217326362 |
| 236682_at   | 0.054122096 | 1.25096265  | 0.215922486 | 0.381882828 |
| 236683_at   | -0.08719522 | -2.30392085 | 0.024793625 | 0.073232218 |
| 236684_at   | -0.05927309 | -1.43890002 | 0.155502024 | 0.301950664 |
| 236685_at   | 0.043443149 | 0.881855307 | 0.381460109 | 0.564192846 |
| 236686_at   | -0.06008587 | -1.68331088 | 0.097638782 | 0.213691691 |
| 236687_at   | 0.03487487  | 1.203703634 | 0.233546915 | 0.402284696 |
| 236688_at   | 0.108892348 | 2.329649027 | 0.023292836 | 0.069697604 |
| 236689_at   | -0.03971432 | -0.89609653 | 0.373869738 | 0.556947647 |
| 236690_at   | 0.058427183 | 1.500579628 | 0.138836487 | 0.27829493  |
| 236691_at   | -0.05260396 | -1.22815765 | 0.224300692 | 0.391411758 |
| 236692_at   | 0.013308972 | 0.402872339 | 0.68850903  | 0.814452915 |
| 236693_at   | -0.11652518 | -3.20125539 | 0.002211949 | 0.009925344 |
| 236694_at   | -0.10466224 | -1.77436301 | 0.081200792 | 0.1858085   |
| 236695_at   | 0.023570558 | 1.010342574 | 0.316487268 | 0.497687727 |
| 236696_at   | 0.237108    | 4.288914018 | 6.81E-05    | 0.000532353 |
| 236697_at   | -0.21480335 | -3.49806663 | 0.000901665 | 0.004678105 |
| 236698_at   | 0.055968922 | 1.085619248 | 0.282095893 | 0.459420948 |
| 236699_at   | 0.164819104 | 2.810420197 | 0.006717285 | 0.025155767 |
| 236700_at   | 0.070317976 | 1.748255425 | 0.085660114 | 0.193554871 |
| 236701_at   | -0.0975475  | -2.96938373 | 0.004319393 | 0.017488883 |
| 236702_at   | 0.043159961 | 0.858185139 | 0.394288839 | 0.577011034 |
| 236703_at   | 0.008460789 | 0.192928813 | 0.84768221  | 0.916282429 |
| 236704_at   | 0.580930202 | 4.786520371 | 1.19E-05    | 0.000123284 |
| 236705_at   | -0.42541385 | -5.68870841 | 4.30E-07    | 8.04E-06    |
| 236706_at   | 0.129959059 | 4.036924566 | 0.000159349 | 0.001087938 |
| 236707_at   | 0.014017751 | 0.357201055 | 0.722225235 | 0.837620091 |
| 236708_at   | 0.017467366 | 0.581018196 | 0.563457545 | 0.724204665 |
| 236709_at   | -0.022752   | -0.62809407 | 0.532384017 | 0.699371168 |
| 236710_at   | 0.738464029 | 5.467573155 | 9.86E-07    | 1.58E-05    |
| 236711_at   | -0.03252543 | -1.2772477  | 0.206555197 | 0.370054732 |
| 236712_at   | -0.04049309 | -1.35233815 | 0.181466014 | 0.337995258 |
| 236713_at   | -0.04116324 | -1.3586986  | 0.179452267 | 0.335255539 |
| 236714_at   | -0.14780778 | -3.75959929 | 0.000394934 | 0.002345683 |
| 236715_x_at | 0.233435759 | 5.381185179 | 1.36E-06    | 2.05E-05    |
| 236716_at   | -0.07219052 | -1.46616015 | 0.14795359  | 0.291408129 |
| 236717_at   | 0.440909786 | 3.748158293 | 0.000409719 | 0.002422113 |
| 236718_at   | 0.043612604 | 0.953879702 | 0.344065112 | 0.526914916 |
| 236719_at   | 0.256112696 | 5.09858745  | 3.86E-06    | 4.87E-05    |
| 236720_at   | -0.01219145 | -0.39180047 | 0.696627695 | 0.820495235 |
| 236721_at   | -0.04890155 | -1.70056311 | 0.094329938 | 0.208279907 |
| 236722_at   | -0.05126672 | -1.72976788 | 0.088939172 | 0.199151735 |
| 236723_at   | -0.01497201 | -0.37007656 | 0.712660417 | 0.831207771 |
| 236724_at   | -0.10950546 | -2.7503625  | 0.007906705 | 0.028808614 |
| 236725_at   | 0.088829539 | 1.830002983 | 0.072340041 | 0.169872905 |
| 236726_at   | -0.06937206 | -1.64274469 | 0.105794746 | 0.227174304 |
| 236727_at   | -0.04576903 | -1.24038412 | 0.219779694 | 0.386638765 |
| 236728_at   | -0.00512606 | -0.13258753 | 0.894974088 | 0.943802522 |
| 236729_at   | -0.09753929 | -2.9399477  | 0.004692502 | 0.018723087 |
| 236730_at   | 0.034497027 | 1.1197351   | 0.267397816 | 0.442694692 |
| 236731_at   | -0.08014173 | -1.87039192 | 0.066429194 | 0.159281804 |
| 236732_at   | 0.116021748 | 2.909526332 | 0.005109377 | 0.020063594 |
| 236733_at   | 0.036389332 | 1.634243027 | 0.107572451 | 0.230096104 |
| 236734_at   | 0.063981627 | 1.054206991 | 0.296117954 | 0.475055769 |
| 236735_at   | 0.01770713  | 0.743010355 | 0.460445514 | 0.638956434 |
| 236736_at   | -0.02185339 | -0.45056538 | 0.653966454 | 0.790206196 |
| 236737_at   | 0.0180062   | 0.556488915 | 0.579996883 | 0.736527922 |
| 236738_at   | -0.0555184  | -1.83601614 | 0.071432974 | 0.168233066 |
| 236739_at   | 0.29823624  | 2.619019846 | 0.011209464 | 0.038262689 |
| 236740_at   | 0.013265448 | 0.383681046 | 0.702604223 | 0.824405679 |
| 236741_at   | 0.023426263 | 0.662984543 | 0.509941497 | 0.680836034 |
| 236742_at   | 0.141539363 | 3.985209193 | 0.000189183 | 0.001257272 |
| 236743_at   | -0.04685491 | -1.27886097 | 0.205990282 | 0.369360577 |
| 236744_at   | -0.0514444  | -0.87474765 | 0.385284429 | 0.567913315 |
| 236745_at   | -0.04040687 | -0.46595716 | 0.642974512 | 0.783120317 |

|             |             |             |             |             |
|-------------|-------------|-------------|-------------|-------------|
| 236746_at   | 0.007246251 | 0.198149928 | 0.843613962 | 0.914117959 |
| 236747_at   | 0.008361541 | 0.178598157 | 0.858869623 | 0.923054823 |
| 236748_at   | 0.054534758 | 1.144753914 | 0.256967925 | 0.43066001  |
| 236749_at   | 0.074687635 | 1.52977477  | 0.131456225 | 0.26742417  |
| 236750_at   | -0.20735294 | -3.46836483 | 0.00098831  | 0.005047951 |
| 236751_at   | -0.0144822  | -0.42168442 | 0.674799183 | 0.804602878 |
| 236752_at   | 0.120629676 | 1.429272319 | 0.158238506 | 0.305829239 |
| 236753_at   | 0.078002696 | 2.118985416 | 0.038342791 | 0.103379344 |
| 236754_at   | 0.021529201 | 0.386740734 | 0.700349815 | 0.822905508 |
| 236755_at   | 0.115638435 | 3.300643152 | 0.001645922 | 0.007750453 |
| 236756_at   | -0.48297266 | -5.73854184 | 3.57E-07    | 6.89E-06    |
| 236757_at   | 0.041710175 | 1.082691975 | 0.283382745 | 0.460861746 |
| 236758_at   | -0.03850601 | -1.02301866 | 0.310506207 | 0.491208927 |
| 236759_at   | -0.07240021 | -1.99061125 | 0.051196787 | 0.129851671 |
| 236760_at   | -0.11264325 | -3.98987161 | 0.000186287 | 0.0012409   |
| 236761_at   | -0.57472628 | -6.34538617 | 3.52E-08    | 1.13E-06    |
| 236762_at   | 0.035584242 | 0.998849182 | 0.321976904 | 0.503932474 |
| 236763_at   | -0.01560524 | -0.40143951 | 0.68955763  | 0.815110813 |
| 236764_at   | 0.105448307 | 2.341650554 | 0.02262084  | 0.068028436 |
| 236765_at   | -0.05672394 | -1.33411945 | 0.187329325 | 0.345270629 |
| 236766_at   | 0.253984016 | 6.27676791  | 4.59E-08    | 1.37E-06    |
| 236767_at   | 0.10560461  | 2.942436489 | 0.004659834 | 0.018613661 |
| 236768_at   | -0.03561674 | -1.42401862 | 0.159747461 | 0.308053472 |
| 236769_at   | -0.13283873 | -2.4029669  | 0.019450168 | 0.060277853 |
| 236770_at   | -0.08843318 | -2.6395243  | 0.010622274 | 0.03661068  |
| 236771_at   | -0.27220742 | -5.10840315 | 3.72E-06    | 4.73E-05    |
| 236772_s_at | 0.110877519 | 3.181752596 | 0.002342628 | 0.01040723  |
| 236773_at   | 0.006645358 | 0.363373859 | 0.71763398  | 0.8346548   |
| 236774_at   | -0.07698448 | -2.30673468 | 0.024625404 | 0.072826796 |
| 236775_s_at | -0.04083756 | -1.05678663 | 0.294948703 | 0.473860358 |
| 236776_at   | -0.03446408 | -0.74557309 | 0.458907295 | 0.637455238 |
| 236777_at   | -0.18115632 | -3.98999395 | 0.000186211 | 0.001240817 |
| 236778_at   | -0.11609301 | -2.20243019 | 0.031584363 | 0.088738816 |
| 236779_at   | 0.103038031 | 2.901242332 | 0.005228703 | 0.020435608 |
| 236780_at   | 0.103693891 | 3.067800346 | 0.0032629   | 0.013788346 |
| 236781_at   | 0.018524558 | 0.489320899 | 0.626442216 | 0.7712235   |
| 236782_at   | -0.03714838 | -1.11622485 | 0.268884735 | 0.444376189 |
| 236783_at   | -0.6159646  | -5.61514166 | 5.68E-07    | 1.00E-05    |
| 236784_s_at | 0.022502495 | 0.745375814 | 0.459025602 | 0.637544961 |
| 236785_at   | -0.06595859 | -1.8311956  | 0.072159374 | 0.169575247 |
| 236786_at   | -0.06170411 | -1.64450082 | 0.105430533 | 0.226609984 |
| 236787_at   | 0.022520248 | 0.612252248 | 0.542740737 | 0.707426814 |
| 236788_at   | -0.04777721 | -1.23833059 | 0.220534307 | 0.387471763 |
| 236789_at   | 0.005694445 | 0.191644813 | 0.848683334 | 0.91689887  |
| 236790_s_at | -0.09567906 | -2.37289482 | 0.020951765 | 0.063952011 |
| 236791_at   | -0.07467502 | -3.67966808 | 0.00050994  | 0.002913607 |
| 236792_at   | 0.057944264 | 1.592117634 | 0.116741871 | 0.244579674 |
| 236793_at   | -0.0250404  | -0.96078798 | 0.340608806 | 0.523505356 |
| 236794_at   | 0.16510049  | 4.127136609 | 0.000117832 | 0.000847192 |
| 236795_at   | 0.304542375 | 4.084170121 | 0.000136102 | 0.000955946 |
| 236796_at   | 0.170708661 | 3.107060122 | 0.002913178 | 0.012518822 |
| 236797_at   | -0.01315298 | -0.42673135 | 0.671139601 | 0.80192918  |
| 236798_at   | -0.36664888 | -5.38042681 | 1.36E-06    | 2.06E-05    |
| 236799_at   | -0.05578382 | -1.43246765 | 0.157326178 | 0.304579665 |
| 236800_at   | -0.05079274 | -1.54504593 | 0.127721977 | 0.261697716 |
| 236801_at   | 0.010372433 | 0.215197406 | 0.830361055 | 0.906040096 |
| 236802_at   | 0.0521243   | 1.311899881 | 0.194673085 | 0.354811367 |
| 236803_at   | 0.019850291 | 0.578987341 | 0.564817992 | 0.725264924 |
| 236804_at   | 0.070931068 | 2.540832335 | 0.013729699 | 0.04517801  |
| 236805_at   | -0.0586517  | -1.8027841  | 0.076567771 | 0.177405091 |
| 236806_at   | 0.030610299 | 0.981190348 | 0.330534884 | 0.51301385  |
| 236807_at   | 0.019416631 | 0.486893056 | 0.628151425 | 0.772533964 |
| 236808_at   | 0.301379547 | 3.982641436 | 0.000190797 | 0.001266275 |
| 236809_at   | 0.161916512 | 1.807214721 | 0.075865826 | 0.176189748 |
| 236810_at   | 0.018760162 | 0.687094732 | 0.494734902 | 0.668259203 |
| 236811_at   | -0.01257201 | -0.44494033 | 0.65800301  | 0.793140257 |
| 236812_at   | 0.066907404 | 1.855742361 | 0.0685242   | 0.163080225 |
| 236813_at   | -0.08360722 | -2.2868914  | 0.025833662 | 0.075669027 |
| 236814_at   | 0.281179629 | 4.767923877 | 1.27E-05    | 0.000130307 |
| 236815_at   | 0.00209732  | 0.055080336 | 0.956261934 | 0.977544279 |
| 236816_at   | 0.109311881 | 2.018171144 | 0.048161434 | 0.123845271 |
| 236817_at   | -0.01490503 | -0.56045476 | 0.57730707  | 0.734422964 |
| 236818_at   | -0.04331644 | -1.35743504 | 0.179850953 | 0.335864065 |
| 236819_at   | -0.02639125 | -0.4839806  | 0.630204502 | 0.774049201 |
| 236820_at   | 0.01547436  | 0.535232611 | 0.594515604 | 0.7476109   |

|             |             |             |             |             |
|-------------|-------------|-------------|-------------|-------------|
| 236821_at   | -0.0338809  | -0.75629498 | 0.452503876 | 0.631840011 |
| 236822_at   | -0.0098768  | -0.22556883 | 0.822322079 | 0.901251124 |
| 236823_at   | -0.26846563 | -5.59184375 | 6.20E-07    | 1.08E-05    |
| 236824_at   | -0.35723942 | -4.57828337 | 2.49E-05    | 0.000230236 |
| 236825_at   | 0.002083019 | 0.06016025  | 0.952232825 | 0.975500605 |
| 236826_at   | -0.03089485 | -1.01585189 | 0.313878297 | 0.494964797 |
| 236827_at   | -0.0716016  | -2.58197504 | 0.012345788 | 0.041407727 |
| 236828_at   | -0.02441125 | -0.62588099 | 0.533824645 | 0.700522389 |
| 236829_at   | 0.090711958 | 2.931492484 | 0.004805082 | 0.019093866 |
| 236830_at   | 0.067836118 | 1.952559794 | 0.055656644 | 0.138775204 |
| 236831_at   | 0.056924078 | 1.379906657 | 0.172860767 | 0.326320921 |
| 236832_at   | 0.291450117 | 4.536173169 | 2.89E-05    | 0.000260132 |
| 236833_at   | 0.033816893 | 0.997491778 | 0.322629431 | 0.50457578  |
| 236834_at   | -0.02559776 | -0.75411748 | 0.453800137 | 0.633076405 |
| 236835_at   | 0.024527815 | 0.68341343  | 0.497040553 | 0.670138059 |
| 236836_at   | 0.042751634 | 0.91788517  | 0.362443667 | 0.545655607 |
| 236837_x_at | 0.161117442 | 2.813096183 | 0.00666834  | 0.024999702 |
| 236838_at   | 0.119506074 | 1.1263336   | 0.264618456 | 0.439519617 |
| 236839_at   | 0.068946919 | 2.260169948 | 0.027543694 | 0.079469514 |
| 236840_at   | -0.03126938 | -1.16336353 | 0.249400035 | 0.421804593 |
| 236841_at   | 0.351601558 | 4.09009965  | 0.000133427 | 0.000939963 |
| 236842_at   | -0.04543897 | -1.7756345  | 0.080988644 | 0.185417984 |
| 236843_at   | -0.00401669 | -0.15274053 | 0.879127916 | 0.93514185  |
| 236844_at   | -0.08825789 | -2.26122794 | 0.027474129 | 0.079323309 |
| 236845_at   | 0.067288172 | 1.550865935 | 0.126321278 | 0.259640775 |
| 236846_at   | -0.00862802 | -0.13089544 | 0.896306618 | 0.944379267 |
| 236847_at   | 0.209662247 | 3.721589779 | 0.000446126 | 0.002599851 |
| 236848_s_at | 0.05027067  | 1.28740156  | 0.203018814 | 0.365762127 |
| 236849_at   | 0.073704728 | 2.131059433 | 0.037292747 | 0.101146222 |
| 236850_at   | -0.02780016 | -0.69833708 | 0.487730103 | 0.662059099 |
| 236851_x_at | -0.03677228 | -1.51597267 | 0.134905458 | 0.272481345 |
| 236852_at   | -0.01654195 | -0.50100443 | 0.618245859 | 0.765561452 |
| 236853_at   | -0.01906599 | -0.59488844 | 0.554209593 | 0.716587379 |
| 236854_at   | -0.01626052 | -0.45337162 | 0.651956562 | 0.789049819 |
| 236855_at   | 0.234823859 | 5.659525773 | 4.80E-07    | 8.76E-06    |
| 236856_x_at | -0.06034814 | -0.7827091  | 0.436951431 | 0.617513071 |
| 236857_at   | -0.0634391  | -1.11962577 | 0.26744404  | 0.442722018 |
| 236858_s_at | -0.01465039 | -0.5846508  | 0.561028153 | 0.722495107 |
| 236859_at   | -0.04912513 | -1.63048454 | 0.108366052 | 0.231347481 |
| 236860_at   | -0.03173134 | -1.15239203 | 0.253842209 | 0.426942496 |
| 236861_at   | -0.02728758 | -0.74293016 | 0.460493699 | 0.638983618 |
| 236862_at   | 0.352469421 | 6.05601813  | 1.07E-07    | 2.66E-06    |
| 236863_at   | -0.03620758 | -0.94036126 | 0.350894779 | 0.534098135 |
| 236864_at   | 0.003450254 | 0.097937661 | 0.922316213 | 0.95936223  |
| 236865_at   | 0.051064276 | 1.649624235 | 0.104373789 | 0.224955313 |
| 236866_at   | -0.05145357 | -1.19597979 | 0.236524182 | 0.405825741 |
| 236867_at   | 0.179153994 | 5.348658835 | 1.54E-06    | 2.27E-05    |
| 236868_at   | 0.068401983 | 2.380472919 | 0.020563904 | 0.062956706 |
| 236869_at   | -0.01338414 | -0.47127536 | 0.639194954 | 0.78062306  |
| 236870_at   | -0.04583598 | -1.44452712 | 0.153919777 | 0.299686245 |
| 236871_s_at | 0.015261626 | 0.47023716  | 0.639932038 | 0.781096344 |
| 236872_at   | 0.037691527 | 1.209408793 | 0.231365343 | 0.399635924 |
| 236873_at   | -0.01787272 | -0.55995266 | 0.57764728  | 0.734709211 |
| 236874_at   | 0.154054423 | 4.105339753 | 0.000126782 | 0.000901537 |
| 236875_at   | -0.20374416 | -4.73464031 | 1.43E-05    | 0.000144187 |
| 236876_at   | -0.06322064 | -1.3817354  | 0.172301202 | 0.325569172 |
| 236877_at   | 0.052237234 | 1.722234589 | 0.090304746 | 0.201433638 |
| 236878_at   | -0.01134774 | -0.35925774 | 0.720694349 | 0.836604463 |
| 236879_at   | 0.076864888 | 1.751440496 | 0.085105437 | 0.192632497 |
| 236880_at   | 0.113498336 | 3.687882946 | 0.000496785 | 0.002850102 |
| 236881_at   | -0.02060552 | -0.87451896 | 0.385407874 | 0.568020338 |
| 236882_at   | 0.228921243 | 3.214373046 | 0.002127942 | 0.009602108 |
| 236883_at   | 0.120671761 | 3.545341719 | 0.000778477 | 0.004142234 |
| 236884_at   | -0.23669514 | -5.85072488 | 2.33E-07    | 4.87E-06    |
| 236885_at   | -0.02766209 | -0.58255157 | 0.562431427 | 0.723364279 |
| 236886_at   | -0.04644977 | -1.80430292 | 0.076326534 | 0.176965421 |
| 236887_at   | -0.1662509  | -3.53339998 | 0.000807988 | 0.004264358 |
| 236888_at   | -0.03021603 | -0.88523851 | 0.37964818  | 0.562313132 |
| 236889_at   | 0.073723383 | 1.777568928 | 0.080666769 | 0.184870481 |
| 236890_at   | 0.011423816 | 0.433821687 | 0.666011837 | 0.79885671  |
| 236891_at   | 0.032093563 | 1.066487075 | 0.290580293 | 0.468949354 |
| 236892_s_at | 0.004272124 | 0.168964473 | 0.866406805 | 0.92774883  |
| 236893_at   | -0.02887615 | -0.69289359 | 0.491114922 | 0.66532004  |
| 236894_at   | 0.004066289 | 0.135834339 | 0.892418061 | 0.942370531 |
| 236895_at   | -0.03124217 | -0.77668981 | 0.440467511 | 0.62092957  |

|             |             |             |             |             |
|-------------|-------------|-------------|-------------|-------------|
| 236896_at   | 0.070071849 | 1.41454053  | 0.162497941 | 0.311849793 |
| 236897_at   | -0.07636293 | -1.89677532 | 0.062792591 | 0.152430913 |
| 236898_at   | -0.06427013 | -1.65835356 | 0.102593185 | 0.221941751 |
| 236899_at   | 0.02309131  | 0.75853819  | 0.451170746 | 0.630510412 |
| 236900_x_at | 0.02078265  | 0.451056521 | 0.653614504 | 0.790079508 |
| 236901_at   | 0.127372915 | 2.717659021 | 0.008632975 | 0.030976738 |
| 236902_at   | -0.41067574 | -5.81640595 | 2.66E-07    | 5.41E-06    |
| 236903_at   | 0.013821256 | 0.452103618 | 0.652864413 | 0.789549894 |
| 236904_x_at | -0.14188536 | -3.3399336  | 0.001462379 | 0.007017032 |
| 236905_at   | 0.009991507 | 0.294115941 | 0.769709199 | 0.868156761 |
| 236906_x_at | -0.09128455 | -2.78121065 | 0.007273505 | 0.026878409 |
| 236907_at   | 0.143829312 | 3.178190156 | 0.002367268 | 0.010501037 |
| 236908_at   | -0.02934282 | -0.57558548 | 0.567100483 | 0.726900932 |
| 236909_at   | 0.3474053   | 3.553771812 | 0.000758266 | 0.004059464 |
| 236910_at   | 0.143720681 | 3.239707221 | 0.001974123 | 0.00900832  |
| 236911_at   | 0.100193847 | 1.984463191 | 0.051895897 | 0.131278303 |
| 236912_at   | 0.052187508 | 2.01116392  | 0.048918107 | 0.125315147 |
| 236913_at   | -0.05033939 | -1.43251879 | 0.157311611 | 0.304564656 |
| 236914_at   | -0.00755651 | -0.2075466  | 0.836303005 | 0.909702913 |
| 236915_at   | -0.00356689 | -0.04081734 | 0.967580347 | 0.983468294 |
| 236916_at   | -0.28124127 | -4.3134184  | 6.26E-05    | 0.000496088 |
| 236917_at   | 0.157418561 | 1.501219759 | 0.138671228 | 0.278114096 |
| 236918_s_at | 0.231563991 | 2.067754568 | 0.043089946 | 0.113477264 |
| 236919_at   | -0.02379367 | -0.66543392 | 0.508385278 | 0.679590669 |
| 236920_at   | 0.023912475 | 0.778925905 | 0.439159391 | 0.619614582 |
| 236921_at   | -0.02023665 | -0.78202043 | 0.437352866 | 0.617865475 |
| 236922_at   | -0.02744256 | -0.80653713 | 0.423196333 | 0.604960674 |
| 236923_x_at | 0.137316059 | 4.228387619 | 8.37E-05    | 0.000633786 |
| 236924_at   | 0.055546971 | 1.283022004 | 0.204538538 | 0.367631495 |
| 236925_at   | -0.05666093 | -1.44436141 | 0.15396619  | 0.299762882 |
| 236926_at   | -0.06191794 | -1.64751061 | 0.104808691 | 0.225600583 |
| 236927_at   | -0.04206074 | -1.03490414 | 0.304968129 | 0.484950295 |
| 236928_at   | -0.05684847 | -1.54615326 | 0.127454525 | 0.261257515 |
| 236929_at   | 0.023755775 | 0.617357127 | 0.539392163 | 0.705178135 |
| 236930_at   | 0.172583085 | 3.933852467 | 0.000224101 | 0.001453629 |
| 236931_at   | 0.039706247 | 0.960056995 | 0.340973443 | 0.52388523  |
| 236932_s_at | -0.00754419 | -0.18952116 | 0.850339675 | 0.917823039 |
| 236933_at   | 0.00926303  | 0.301818258 | 0.763859775 | 0.864241945 |
| 236934_at   | 0.26697935  | 4.677323787 | 1.76E-05    | 0.000171099 |
| 236935_at   | -0.12868227 | -4.12298335 | 0.000119489 | 0.000856899 |
| 236936_at   | 0.238307813 | 3.139321166 | 0.002652394 | 0.011571731 |
| 236937_at   | -0.01946934 | -0.42945045 | 0.669171266 | 0.800690804 |
| 236938_at   | -0.11171731 | -2.79225213 | 0.007058445 | 0.026226388 |
| 236939_at   | -0.09594981 | -2.59517219 | 0.01192949  | 0.040280504 |
| 236940_at   | -0.01635031 | -0.43126454 | 0.667859352 | 0.799870569 |
| 236941_at   | 0.029345317 | 0.963699677 | 0.339158899 | 0.52203091  |
| 236942_at   | 0.004723979 | 0.159188739 | 0.874067879 | 0.932239193 |
| 236943_at   | -0.01282454 | -0.32920667 | 0.74317391  | 0.85115282  |
| 236944_at   | -0.00786252 | -0.14308914 | 0.886710956 | 0.939238898 |
| 236945_at   | -0.04674088 | -1.43011977 | 0.157996144 | 0.305440076 |
| 236946_at   | 0.289265211 | 3.723377803 | 0.000443582 | 0.002586373 |
| 236947_at   | -0.02683837 | -1.14057897 | 0.258687958 | 0.432666525 |
| 236948_x_at | -0.258091   | -4.08891459 | 0.000133958 | 0.000942809 |
| 236949_at   | 0.034774813 | 0.727971207 | 0.469531778 | 0.646247859 |
| 236950_s_at | 0.028593866 | 1.090256454 | 0.280065672 | 0.457241408 |
| 236951_at   | 0.057603368 | 1.529591374 | 0.131501593 | 0.267461039 |
| 236952_at   | 0.023787656 | 0.572184702 | 0.569386771 | 0.728264942 |
| 236953_s_at | 0.032609391 | 0.776411946 | 0.440630223 | 0.621003625 |
| 236954_at   | 0.011117348 | 0.287751243 | 0.774552965 | 0.870961702 |
| 236955_at   | 0.094314515 | 1.937724223 | 0.057483323 | 0.142228249 |
| 236956_at   | 0.041531497 | 1.237349187 | 0.220895618 | 0.387786431 |
| 236957_at   | -0.06961145 | -1.8132916  | 0.074911832 | 0.174500134 |
| 236958_at   | 0.011839741 | 0.318177189 | 0.751482349 | 0.857007046 |
| 236959_s_at | -0.01951815 | -0.5385007  | 0.592272341 | 0.745797236 |
| 236960_at   | 0.025736949 | 0.960034022 | 0.340984907 | 0.52388523  |
| 236961_at   | 0.222740084 | 4.983277501 | 5.87E-06    | 6.85E-05    |
| 236962_at   | 0.201739466 | 3.54468959  | 0.000780062 | 0.004147832 |
| 236963_at   | 0.042993663 | 1.275367954 | 0.207214877 | 0.370968085 |
| 236964_at   | 0.074472803 | 1.719878539 | 0.090735368 | 0.202140965 |
| 236965_at   | 0.062063905 | 1.75903232  | 0.083795335 | 0.190187451 |
| 236966_at   | 0.308281218 | 4.112867931 | 0.000123619 | 0.000882414 |
| 236967_at   | -0.04561348 | -1.28320344 | 0.204475412 | 0.367580351 |
| 236968_at   | 0.019677593 | 0.67600229  | 0.501700012 | 0.67398031  |
| 236969_at   | -0.00777877 | -0.1950632  | 0.846018603 | 0.915414086 |
| 236970_s_at | -0.05300884 | -1.55884238 | 0.124421552 | 0.256641345 |

|             |             |             |             |             |
|-------------|-------------|-------------|-------------|-------------|
| 236971_at   | 0.039959518 | 1.843997657 | 0.07024377  | 0.166111147 |
| 236972_at   | 0.045780234 | 1.73197107  | 0.088543035 | 0.198503403 |
| 236973_at   | 0.029051949 | 0.669027325 | 0.506106821 | 0.677619114 |
| 236974_at   | -0.15913821 | -3.17283563 | 0.002404762 | 0.010631477 |
| 236975_at   | -0.07815427 | -1.75761059 | 0.084039396 | 0.190673606 |
| 236976_at   | -0.0607728  | -1.45019325 | 0.152339264 | 0.297437589 |
| 236977_at   | 0.037055605 | 1.233872954 | 0.222178919 | 0.38919829  |
| 236978_at   | 0.149489113 | 3.031929998 | 0.003616362 | 0.015044442 |
| 236979_at   | 0.059522093 | 2.024562294 | 0.047480104 | 0.122473629 |
| 236980_at   | -0.04095936 | -1.32623362 | 0.189911269 | 0.348663453 |
| 236981_at   | 0.055296487 | 1.628255055 | 0.108839046 | 0.232072264 |
| 236982_at   | -0.02764707 | -0.53572948 | 0.594174287 | 0.747307852 |
| 236983_at   | -0.0775475  | -1.6874746  | 0.096831625 | 0.212387071 |
| 236984_at   | -0.03239117 | -0.6854958  | 0.495735612 | 0.668831549 |
| 236985_at   | -0.06682618 | -2.04663512 | 0.045190579 | 0.117868641 |
| 236986_at   | -0.02293574 | -0.64716537 | 0.520053545 | 0.689189688 |
| 236987_at   | -0.00702638 | -0.26729163 | 0.790183647 | 0.880523835 |
| 236988_x_at | 0.000208018 | 0.005798216 | 0.995393424 | 0.997864832 |
| 236989_at   | 0.073133465 | 1.971711852 | 0.053372029 | 0.134194245 |
| 236990_at   | 0.050048085 | 2.175428867 | 0.033646756 | 0.093324695 |
| 236991_at   | -0.01119473 | -0.30590033 | 0.760765274 | 0.862278199 |
| 236992_at   | 0.032977284 | 0.885510601 | 0.379502692 | 0.562121694 |
| 236993_at   | 0.040261515 | 1.282400296 | 0.20475496  | 0.367875725 |
| 236994_at   | 0.110065386 | 2.279185924 | 0.026316843 | 0.076786525 |
| 236995_x_at | -0.00523678 | -0.28525203 | 0.776457431 | 0.871933867 |
| 236996_at   | -0.06688984 | -1.74852587 | 0.085612901 | 0.193477536 |
| 236997_at   | 0.038865492 | 1.431241104 | 0.157675897 | 0.305018879 |
| 236998_at   | -0.00104193 | -0.03769554 | 0.97005863  | 0.984891851 |
| 236999_at   | 0.124026845 | 2.322776838 | 0.02368558  | 0.070679087 |
| 237000_at   | -0.04666729 | -1.7630488  | 0.083109023 | 0.189004094 |
| 237001_at   | 0.015812379 | 0.602884091 | 0.54891335  | 0.712105529 |
| 237002_at   | -0.30161668 | -5.82104506 | 2.61E-07    | 5.34E-06    |
| 237003_at   | 0.122403438 | 3.471355713 | 0.00097924  | 0.005009063 |
| 237004_at   | -0.02907621 | -0.93543155 | 0.353407114 | 0.536573213 |
| 237005_at   | -0.05181778 | -0.85645489 | 0.395236991 | 0.577856962 |
| 237006_at   | 0.594122426 | 6.053247845 | 1.08E-07    | 2.68E-06    |
| 237007_at   | -0.04477534 | -1.70386322 | 0.093707626 | 0.207209386 |
| 237008_at   | 0.076864058 | 2.615697307 | 0.01130735  | 0.03852913  |
| 237009_at   | -0.02241383 | -0.80840986 | 0.422126396 | 0.604081144 |
| 237010_at   | -0.03126378 | -1.06807722 | 0.289868485 | 0.468087958 |
| 237011_at   | -0.0438231  | -1.26582113 | 0.210589471 | 0.375340563 |
| 237012_at   | 0.074647896 | 1.887613002 | 0.064035889 | 0.154847526 |
| 237013_at   | 0.017402776 | 0.548387905 | 0.585510002 | 0.740804956 |
| 237014_at   | 0.018616709 | 0.438599388 | 0.662565571 | 0.796304537 |
| 237015_at   | -0.17119861 | -2.77826495 | 0.00733189  | 0.0270472   |
| 237016_at   | -0.0382485  | -1.30244151 | 0.197864111 | 0.358885668 |
| 237017_s_at | 0.013522309 | 0.388681083 | 0.698921546 | 0.821853915 |
| 237018_at   | 0.037903004 | 0.813903807 | 0.41899698  | 0.601342744 |
| 237019_at   | -0.11234986 | -2.19596634 | 0.032067688 | 0.089859496 |
| 237020_at   | 0.13126488  | 1.861872946 | 0.067640793 | 0.161528309 |
| 237021_at   | -0.04313952 | -1.37811089 | 0.1734116   | 0.327105525 |
| 237022_at   | 0.025055469 | 0.734852082 | 0.465361964 | 0.643174807 |
| 237023_at   | -0.02792006 | -0.70389639 | 0.48428664  | 0.659186774 |
| 237024_at   | 0.000433549 | 0.011311464 | 0.991013394 | 0.995803912 |
| 237025_at   | 0.110340312 | 2.786356066 | 0.007172546 | 0.026575643 |
| 237026_at   | 0.494597748 | 5.123285248 | 3.52E-06    | 4.52E-05    |
| 237027_at   | 0.064925546 | 1.82357503  | 0.073320357 | 0.171617055 |
| 237028_at   | -0.08417832 | -1.96021485 | 0.054733648 | 0.136985844 |
| 237029_at   | -0.01934062 | -0.5472182  | 0.586308101 | 0.741371462 |
| 237030_at   | 0.037774555 | 0.915711993 | 0.363573119 | 0.546729805 |
| 237031_at   | -0.00876719 | -0.24912994 | 0.804131918 | 0.889671684 |
| 237032_x_at | -0.02819005 | -1.49548206 | 0.140158054 | 0.280273562 |
| 237033_at   | 0.001245709 | 0.036976027 | 0.970629868 | 0.985156361 |
| 237034_at   | 0.032763109 | 0.684238192 | 0.496523483 | 0.669590661 |
| 237035_at   | 0.451864774 | 4.968151371 | 6.20E-06    | 7.19E-05    |
| 237036_at   | -0.06712096 | -1.83658099 | 0.071348262 | 0.16807382  |
| 237037_at   | -0.02853273 | -1.09811799 | 0.276647117 | 0.453135904 |
| 237038_at   | -0.02237569 | -0.73099356 | 0.467697626 | 0.644815595 |
| 237039_at   | -0.0446917  | -1.11621068 | 0.268890747 | 0.444376189 |
| 237040_at   | 0.174641965 | 3.708519784 | 0.000465153 | 0.002694919 |
| 237041_x_at | 0.019700562 | 0.565555984 | 0.573856081 | 0.731761469 |
| 237042_at   | 0.022819112 | 0.846767832 | 0.400571421 | 0.582897774 |
| 237043_at   | -0.05577906 | -1.53438685 | 0.130319394 | 0.265692    |
| 237044_s_at | -0.11477615 | -2.43871274 | 0.01779121  | 0.056002589 |
| 237045_at   | 0.064201992 | 1.959780714 | 0.054785641 | 0.137077587 |

|             |             |             |             |             |
|-------------|-------------|-------------|-------------|-------------|
| 237046_x_at | 0.00673056  | 0.136884706 | 0.891591411 | 0.941941737 |
| 237047_at   | 0.052909057 | 1.743271808 | 0.086534016 | 0.195075826 |
| 237048_at   | -0.00362665 | -0.09787833 | 0.922363118 | 0.959370985 |
| 237049_at   | 0.011771489 | 0.336286263 | 0.737856941 | 0.84789423  |
| 237050_at   | 0.03889443  | 1.192807095 | 0.237755088 | 0.407210484 |
| 237051_at   | 0.024756235 | 0.890840818 | 0.376659728 | 0.55939889  |
| 237052_x_at | 0.044612631 | 1.20483949  | 0.233111391 | 0.401797767 |
| 237053_at   | -1.1421691  | -7.07575948 | 2.09E-09    | 1.50E-07    |
| 237054_at   | 0.087344106 | 1.719481354 | 0.090808129 | 0.202262493 |
| 237055_at   | -0.03054974 | -1.11323193 | 0.270157103 | 0.445841756 |
| 237056_at   | -0.01231556 | -0.31970753 | 0.750327756 | 0.856228996 |
| 237057_at   | -0.01782085 | -0.6522076  | 0.516818937 | 0.686489153 |
| 237058_x_at | 0.019544103 | 0.190798054 | 0.849343682 | 0.917306379 |
| 237059_at   | -0.04375843 | -1.21995474 | 0.227371885 | 0.394889286 |
| 237060_at   | -0.01830503 | -0.55519273 | 0.580877318 | 0.737086836 |
| 237061_at   | 0.004816755 | 0.170803564 | 0.864966955 | 0.926907301 |
| 237062_at   | 0.026287802 | 0.522451529 | 0.603326731 | 0.754107793 |
| 237063_at   | 0.000483077 | 0.013715423 | 0.989103634 | 0.9949255   |
| 237064_x_at | -0.01722076 | -0.6318676  | 0.529932256 | 0.697257114 |
| 237065_s_at | -0.00426068 | -0.1057445  | 0.916146432 | 0.955462076 |
| 237066_at   | 0.02945787  | -1.04240242 | 0.301509072 | 0.481062562 |
| 237067_at   | 0.009094504 | 0.341261063 | 0.734128397 | 0.8451743   |
| 237068_at   | -0.00020975 | -0.00606814 | 0.995178974 | 0.997746342 |
| 237069_s_at | 0.052047285 | 1.562289073 | 0.12360777  | 0.255304485 |
| 237070_at   | -0.03141553 | -1.31861655 | 0.192430666 | 0.352045164 |
| 237071_at   | -0.05962085 | -2.18011736 | 0.033280381 | 0.092496659 |
| 237072_at   | 0.02095824  | 0.618423634 | 0.538693924 | 0.704801337 |
| 237073_at   | -0.0700757  | -1.4472976  | 0.153145387 | 0.298672265 |
| 237074_at   | -0.10027693 | -2.58837759 | 0.012142202 | 0.040878288 |
| 237075_at   | -0.16338588 | -4.1338241  | 0.000115211 | 0.00083075  |
| 237076_at   | 0.011409399 | 0.370970345 | 0.711998152 | 0.830825625 |
| 237077_at   | 0.078040495 | 2.035977878 | 0.046283815 | 0.120157783 |
| 237078_at   | 0.026938401 | 0.853053627 | 0.397104947 | 0.579450643 |
| 237079_at   | -0.05195538 | -1.36850799 | 0.176380041 | 0.331070004 |
| 237080_at   | -0.02794491 | -0.75801722 | 0.451480151 | 0.630846873 |
| 237081_at   | 0.049266327 | 1.641704057 | 0.106011052 | 0.227540387 |
| 237082_at   | -0.04480257 | -1.25439362 | 0.214682266 | 0.380359954 |
| 237083_at   | 0.009946166 | 0.286305866 | 0.775654213 | 0.871628526 |
| 237084_at   | -0.14805886 | -4.67013831 | 1.80E-05    | 0.000174789 |
| 237085_x_at | -0.00703937 | -0.20007246 | 0.842117014 | 0.913304837 |
| 237086_at   | -0.07197123 | -2.5573796  | 0.013157026 | 0.043621201 |
| 237087_at   | -0.04927639 | -1.31213265 | 0.194595047 | 0.354698064 |
| 237088_at   | -0.00646166 | -0.17414171 | 0.862354652 | 0.925116517 |
| 237089_at   | -0.05447472 | -1.86078009 | 0.067797564 | 0.161796961 |
| 237090_at   | -0.01743127 | -0.45221548 | 0.652784304 | 0.789474377 |
| 237091_at   | -0.01875227 | -0.41184443 | 0.681956912 | 0.809849774 |
| 237092_at   | -0.04030571 | -1.08876446 | 0.280717769 | 0.45789403  |
| 237093_at   | -0.05723508 | -1.32086905 | 0.191683025 | 0.351007857 |
| 237094_at   | 0.060772839 | 0.985362894 | 0.328499244 | 0.511026774 |
| 237095_at   | 0.01778668  | 0.474781162 | 0.636708675 | 0.778597856 |
| 237096_at   | -0.09545364 | -2.73748455 | 0.008185723 | 0.029648782 |
| 237097_at   | 0.037639883 | 1.329039469 | 0.188989526 | 0.347427909 |
| 237098_at   | -0.07343911 | -1.94673379 | 0.05636799  | 0.140134518 |
| 237099_at   | 0.00999912  | 0.227118136 | 0.82112282  | 0.900555118 |
| 237100_at   | 0.017865761 | 0.564307683 | 0.574699633 | 0.732460959 |
| 237101_at   | -0.01418074 | -0.38995003 | 0.69798808  | 0.821203392 |
| 237102_at   | -0.01778641 | -0.60652369 | 0.546511025 | 0.710453205 |
| 237103_at   | -0.1206554  | -3.30167982 | 0.001640812 | 0.007731277 |
| 237104_at   | 0.135670917 | 3.094680471 | 0.003019477 | 0.012913565 |
| 237105_at   | -0.05939451 | -2.80188963 | 0.006875534 | 0.025660238 |
| 237106_at   | 0.063916055 | 2.398922192 | 0.019646357 | 0.060700656 |
| 237107_at   | 0.20377643  | 2.941866141 | 0.004667302 | 0.018634183 |
| 237108_x_at | 0.010699496 | 0.308224641 | 0.759005025 | 0.861277937 |
| 237109_at   | -0.02758777 | -0.83463284 | 0.407316143 | 0.589672284 |
| 237110_at   | 0.056903109 | 1.493372312 | 0.140707913 | 0.28098663  |
| 237111_at   | -0.09680981 | -2.16098915 | 0.034797442 | 0.095832344 |
| 237112_at   | 0.064332534 | 2.394633922 | 0.019856294 | 0.061234991 |
| 237113_at   | 0.051185873 | 1.766857921 | 0.082462465 | 0.18784915  |
| 237114_at   | 0.033562482 | 0.965956325 | 0.338037979 | 0.520861691 |
| 237115_at   | -0.03969559 | -1.34951526 | 0.182365247 | 0.339212869 |
| 237116_at   | 0.110458051 | 1.861221473 | 0.06773421  | 0.161682759 |
| 237117_at   | -0.01239219 | -0.35629473 | 0.722900217 | 0.838099194 |
| 237118_at   | 0.178291467 | 3.22236019  | 0.00207827  | 0.00941245  |
| 237119_at   | -0.00209582 | -0.05129089 | 0.95926827  | 0.979133132 |
| 237120_at   | 0.024775847 | 0.774326898 | 0.441852309 | 0.622176609 |

|             |             |             |             |             |
|-------------|-------------|-------------|-------------|-------------|
| 237121_at   | -0.069165   | -1.99691536 | 0.050488345 | 0.128451365 |
| 237122_at   | -0.0629562  | -1.63407231 | 0.107608396 | 0.23015096  |
| 237123_x_at | -0.03367665 | -1.56634547 | 0.122655496 | 0.25380114  |
| 237124_at   | -0.0083349  | -0.25142494 | 0.802365709 | 0.888552872 |
| 237125_at   | 0.005391591 | 0.128017699 | 0.898573542 | 0.945808967 |
| 237126_at   | -0.00587646 | -0.19115702 | 0.849063731 | 0.917154644 |
| 237127_at   | -0.00532954 | -0.20341216 | 0.839518002 | 0.911491838 |
| 237128_at   | -0.04603853 | -1.22366049 | 0.225980655 | 0.393452314 |
| 237129_at   | -0.0468469  | -1.36276374 | 0.17817418  | 0.333652914 |
| 237130_at   | -0.07872925 | -2.33667101 | 0.022897531 | 0.068717195 |
| 237131_at   | -0.26508369 | -4.3049005  | 6.44E-05    | 0.000508534 |
| 237132_at   | 0.018286498 | 0.57244487  | 0.569211705 | 0.728103539 |
| 237133_at   | 0.007682464 | 0.237122829 | 0.813388998 | 0.89525874  |
| 237134_at   | -0.35449897 | -6.75494643 | 7.25E-09    | 3.57E-07    |
| 237135_at   | -0.00673424 | -0.21595392 | 0.829774049 | 0.905576465 |
| 237136_at   | -0.02382721 | -0.73336216 | 0.466263062 | 0.643672452 |
| 237137_at   | 0.021924048 | 0.617720315 | 0.539154333 | 0.705085214 |
| 237138_at   | -0.01918895 | -0.75928408 | 0.45072797  | 0.630128079 |
| 237139_at   | -0.06531561 | -2.09472043 | 0.04053124  | 0.108002753 |
| 237140_x_at | -0.0642501  | -1.76783055 | 0.082298044 | 0.187541514 |
| 237141_x_at | -0.04795094 | -1.85658869 | 0.068401669 | 0.162892705 |
| 237142_at   | -0.00570466 | -0.27172623 | 0.786788112 | 0.878353716 |
| 237143_at   | -0.03977167 | -1.15050623 | 0.254611389 | 0.427865847 |
| 237144_at   | -0.00790889 | -0.19997804 | 0.84219052  | 0.913350612 |
| 237145_at   | 0.027892073 | 0.932453805 | 0.354930301 | 0.538059937 |
| 237146_at   | 0.157088059 | 3.988133979 | 0.000187361 | 0.001246435 |
| 237147_at   | 0.039570169 | 1.288568491 | 0.202615311 | 0.365176572 |
| 237148_at   | -0.05883504 | -1.8677578  | 0.066801855 | 0.159952236 |
| 237149_at   | 0.009956392 | 0.458770136 | 0.648097302 | 0.786466225 |
| 237150_at   | -0.02375817 | -0.79372479 | 0.430559886 | 0.61139969  |
| 237151_s_at | 0.129503768 | 2.424692071 | 0.018426128 | 0.057651954 |
| 237152_at   | -0.00408737 | -0.11825437 | 0.906270765 | 0.950310329 |
| 237153_at   | -0.05782519 | -1.41880876 | 0.161254827 | 0.310116645 |
| 237154_at   | 0.033508518 | 1.019530349 | 0.312144441 | 0.493104202 |
| 237155_at   | -0.0007855  | -0.02610719 | 0.979260599 | 0.989623614 |
| 237156_at   | -0.00237517 | -0.05983668 | 0.952489429 | 0.975696385 |
| 237157_at   | 0.22104975  | 3.763423454 | 0.000390107 | 0.002322147 |
| 237158_s_at | -0.07226274 | -1.72085121 | 0.090557385 | 0.201854896 |
| 237159_x_at | -0.07864231 | -2.56977242 | 0.012742414 | 0.042505146 |
| 237160_at   | -0.02447509 | -1.19534714 | 0.236769262 | 0.406097856 |
| 237161_at   | -0.01235525 | -0.35746037 | 0.722032149 | 0.837466406 |
| 237162_at   | 0.038668634 | 1.066518384 | 0.290566266 | 0.468949354 |
| 237163_x_at | 0.102815284 | 2.967228128 | 0.004345751 | 0.017578087 |
| 237164_at   | -0.03774891 | -1.1873188  | 0.239895318 | 0.409792514 |
| 237165_at   | -0.03242306 | -1.04876421 | 0.298595383 | 0.477761165 |
| 237166_at   | 0.067350058 | 1.860426036 | 0.067848419 | 0.161868443 |
| 237167_at   | 0.006685479 | 0.187635138 | 0.851811249 | 0.918634887 |
| 237168_at   | 0.530206068 | 3.371146847 | 0.001330539 | 0.006480343 |
| 237169_at   | 0.200945871 | 3.308020787 | 0.001609878 | 0.007603158 |
| 237170_at   | -0.07553331 | -2.84425442 | 0.006122147 | 0.023297939 |
| 237171_at   | 0.053396237 | 1.472245022 | 0.146308514 | 0.288983079 |
| 237172_at   | -0.00033466 | -0.01033351 | 0.991790321 | 0.996181437 |
| 237173_at   | 0.116548802 | 2.806669376 | 0.006786448 | 0.025378399 |
| 237174_at   | 0.035844612 | 1.112304295 | 0.270552325 | 0.446247583 |
| 237175_at   | 0.01854152  | 0.607260764 | 0.546025172 | 0.710090118 |
| 237176_at   | 0.012692885 | 0.369008663 | 0.713451993 | 0.831740309 |
| 237177_at   | -0.24602644 | -5.82650062 | 2.56E-07    | 5.26E-06    |
| 237178_at   | -0.06818094 | -1.81898646 | 0.07402695  | 0.172907517 |
| 237179_at   | 0.085954293 | 2.097037424 | 0.04031768  | 0.10754269  |
| 237180_at   | 0.218804699 | 4.072648778 | 0.000141449 | 0.00098637  |
| 237181_at   | 0.09602171  | 3.26473397  | 0.001832494 | 0.008480671 |
| 237182_at   | 0.018629021 | 0.809034021 | 0.421770163 | 0.603759839 |
| 237183_at   | 0.021165415 | 0.671573985 | 0.504495414 | 0.676434329 |
| 237184_at   | -0.01091944 | -0.27127527 | 0.787133217 | 0.878541475 |
| 237185_at   | 0.234639718 | 3.283534891 | 0.001732457 | 0.008086207 |
| 237186_at   | -0.05727066 | -1.72320851 | 0.090127233 | 0.201106711 |
| 237187_at   | 0.026282247 | 0.794385717 | 0.43017818  | 0.61104388  |
| 237188_x_at | -0.01454525 | -0.4258944  | 0.671745938 | 0.80235713  |
| 237189_at   | -0.06740118 | -2.29624617 | 0.025257646 | 0.074313016 |
| 237190_at   | 0.111632702 | 3.088974112 | 0.003069687 | 0.013096941 |
| 237191_x_at | 0.00171852  | 0.051537303 | 0.959072757 | 0.979051614 |
| 237192_at   | -0.06326048 | -1.38394743 | 0.171626214 | 0.324614615 |
| 237193_s_at | 0.021487917 | 0.684228317 | 0.496529672 | 0.669590661 |
| 237194_at   | 0.123995766 | 2.684695859 | 0.009426447 | 0.03326772  |
| 237195_at   | -0.02112156 | -0.41938976 | 0.676465677 | 0.805837461 |

|             |             |             |             |             |
|-------------|-------------|-------------|-------------|-------------|
| 237196_at   | -0.04141576 | -1.10275763 | 0.27464333  | 0.45092922  |
| 237197_at   | -0.01975981 | -0.4186372  | 0.677012584 | 0.806209603 |
| 237198_at   | -0.10327336 | -2.75412931 | 0.007826759 | 0.028561568 |
| 237199_at   | 0.053769121 | 1.508931525 | 0.136692518 | 0.275096232 |
| 237200_at   | -0.05942022 | -1.60051537 | 0.114865314 | 0.241595983 |
| 237201_at   | 0.011320326 | 0.271868721 | 0.786679076 | 0.87831975  |
| 237202_at   | 0.067709398 | 1.85407477  | 0.068766173 | 0.16350954  |
| 237203_at   | 0.018394872 | 0.557917576 | 0.579027207 | 0.735798043 |
| 237204_at   | -0.00855315 | -0.23010083 | 0.818815233 | 0.898994998 |
| 237205_at   | -0.01144475 | -0.53135285 | 0.597183889 | 0.749595348 |
| 237206_at   | 0.073203597 | 2.763987502 | 0.007621034 | 0.027927127 |
| 237207_at   | 0.010750281 | 0.288210499 | 0.774203151 | 0.870786139 |
| 237208_at   | 0.062427429 | 1.034112266 | 0.305335    | 0.485313032 |
| 237209_s_at | -0.09497261 | -3.14540692 | 0.002605721 | 0.011394685 |
| 237210_at   | 0.023539661 | 0.73123108  | 0.467553657 | 0.64473644  |
| 237211_x_at | 0.144253978 | 2.646639763 | 0.010425157 | 0.036056423 |
| 237212_at   | -0.04372812 | -1.15871956 | 0.251273453 | 0.424154448 |
| 237213_at   | -0.20681518 | -6.39375539 | 2.93E-08    | 9.78E-07    |
| 237214_at   | 0.015937509 | 0.48085104  | 0.632413897 | 0.775733275 |
| 237215_s_at | 0.090878616 | 2.16450304  | 0.034514295 | 0.095222721 |
| 237216_at   | 0.316620956 | 4.401216564 | 4.62E-05    | 0.000385629 |
| 237217_at   | -0.05733328 | -1.88525721 | 0.064358912 | 0.155418985 |
| 237218_at   | 0.214946275 | 4.687632961 | 1.69E-05    | 0.000165678 |
| 237219_at   | -0.11034827 | -3.25757291 | 0.00187201  | 0.008633151 |
| 237220_at   | -0.06941097 | -1.48890295 | 0.141878372 | 0.282703572 |
| 237221_at   | -0.07364264 | -2.5638028  | 0.012940629 | 0.043031442 |
| 237222_at   | -0.03735369 | -1.17422468 | 0.245057712 | 0.416335409 |
| 237223_at   | 0.103241967 | 3.380450334 | 0.001293471 | 0.006324013 |
| 237224_at   | 0.011856219 | 0.267480274 | 0.790039122 | 0.880509438 |
| 237225_at   | 0.041572427 | 1.562901073 | 0.12346372  | 0.255054107 |
| 237226_at   | -0.10407872 | -2.87012215 | 0.005700413 | 0.021950962 |
| 237227_at   | -0.00487778 | -0.13685209 | 0.891617075 | 0.941941737 |
| 237228_at   | -0.07048088 | -1.9421373  | 0.056934679 | 0.141221261 |
| 237229_at   | -0.0274064  | -0.86435762 | 0.39091793  | 0.573719432 |
| 237230_at   | 0.055902432 | 1.892874082 | 0.063319452 | 0.153405592 |
| 237231_at   | -0.00813794 | -0.27290279 | 0.785887928 | 0.87790348  |
| 237232_at   | 0.053968693 | 1.652008219 | 0.103885024 | 0.22416133  |
| 237233_at   | -0.10775067 | -4.04677484 | 0.000154206 | 0.00105805  |
| 237234_at   | 0.0508684   | 1.456802382 | 0.150511756 | 0.294947134 |
| 237235_at   | -0.09675453 | -2.31986918 | 0.023853518 | 0.071051815 |
| 237236_x_at | -0.03795113 | -0.94918993 | 0.346424514 | 0.52945778  |
| 237237_at   | 0.043631204 | 1.157852531 | 0.251624331 | 0.424550688 |
| 237238_at   | 0.098603826 | 2.133448775 | 0.037087954 | 0.10070078  |
| 237239_at   | 0.162038132 | 4.236882732 | 8.13E-05    | 0.00061867  |
| 237240_at   | -0.06468345 | -2.48877186 | 0.015681658 | 0.050445883 |
| 237241_at   | -0.02438791 | -0.61374019 | 0.541763617 | 0.706800869 |
| 237242_at   | 0.009870427 | 0.34514272  | 0.731223602 | 0.843215089 |
| 237243_at   | -0.03220249 | -1.22575077 | 0.225198666 | 0.392473046 |
| 237244_at   | 0.003864006 | 0.133566072 | 0.894203618 | 0.943542916 |
| 237245_at   | -0.03067298 | -1.02592001 | 0.309148068 | 0.489719117 |
| 237246_at   | 0.056747902 | 2.393177579 | 0.019928047 | 0.061409657 |
| 237247_at   | -0.0315518  | -0.74808599 | 0.457401861 | 0.636129995 |
| 237248_at   | 0.082858586 | 1.643063053 | 0.105728644 | 0.227054181 |
| 237249_at   | 0.110687828 | 3.037072426 | 0.003563584 | 0.014859459 |
| 237250_at   | -0.33997251 | -3.32291048 | 0.001539392 | 0.007318989 |
| 237251_at   | 0.033294397 | 0.673700977 | 0.503151684 | 0.675280932 |
| 237252_at   | 0.026919714 | 1.21078048  | 0.23084305  | 0.399026788 |
| 237253_at   | 0.006555546 | 0.21874872  | 0.827606306 | 0.904403282 |
| 237254_at   | 0.229538937 | 2.723793317 | 0.008492251 | 0.030565812 |
| 237255_at   | -0.00037729 | -0.01147851 | 0.990880687 | 0.995715338 |
| 237256_at   | -0.04000543 | -1.15457365 | 0.252954437 | 0.425930212 |
| 237257_at   | -0.13450978 | -2.70866999 | 0.008843053 | 0.03156155  |
| 237258_at   | -0.01575328 | -0.48318867 | 0.630763269 | 0.774443992 |
| 237259_at   | -0.02676635 | -0.82792335 | 0.41107498  | 0.593288219 |
| 237260_at   | -0.07447577 | -1.51557904 | 0.135004871 | 0.272657495 |
| 237261_at   | 0.068819919 | 1.524814688 | 0.132687621 | 0.269185598 |
| 237262_at   | 0.139913885 | 2.708079425 | 0.008857018 | 0.031598773 |
| 237263_at   | -0.04650281 | -1.23120934 | 0.223165929 | 0.390315489 |
| 237264_at   | 0.101517315 | 2.110137829 | 0.039128521 | 0.104965897 |
| 237265_at   | 0.011911894 | 0.521967047 | 0.603661909 | 0.754387941 |
| 237266_at   | -0.03728073 | -0.92049987 | 0.361087734 | 0.544182533 |
| 237267_at   | 0.027826591 | 0.784174473 | 0.436097972 | 0.616633275 |
| 237268_at   | -0.09397177 | -2.16385443 | 0.034566406 | 0.095322853 |
| 237269_at   | 0.04170942  | 1.761020795 | 0.08345497  | 0.189568971 |
| 237270_at   | 0.050168059 | 1.987553318 | 0.051543494 | 0.13059523  |



|             |             |             |             |             |
|-------------|-------------|-------------|-------------|-------------|
| 237271_at   | -0.04064956 | -1.33158307 | 0.18815686  | 0.346367345 |
| 237272_at   | -0.02755976 | -1.12272211 | 0.266137114 | 0.441343224 |
| 237273_at   | -0.04687153 | -1.22069962 | 0.227091737 | 0.394602796 |
| 237274_at   | -0.02687657 | -0.72678    | 0.470255799 | 0.64694552  |
| 237275_at   | -0.02385041 | -0.83880899 | 0.404987209 | 0.587328045 |
| 237276_at   | -0.0578028  | -1.72758466 | 0.089333161 | 0.199853714 |
| 237277_at   | -0.04850403 | -1.27484359 | 0.207399179 | 0.371151151 |
| 237278_x_at | 0.047973956 | 1.762958791 | 0.083124351 | 0.18901584  |
| 237279_at   | -0.04125818 | -1.22817049 | 0.224295911 | 0.391411758 |
| 237280_at   | -0.06650696 | -2.02454053 | 0.04748241  | 0.122473629 |
| 237281_at   | 0.237533944 | 2.988572082 | 0.004091231 | 0.016710411 |
| 237282_s_at | 0.113985473 | 2.164444222 | 0.034519017 | 0.095229872 |
| 237283_at   | 0.013141182 | 0.413906027 | 0.680454821 | 0.808606633 |
| 237284_at   | -0.0158005  | -0.392252   | 0.696295891 | 0.820212335 |
| 237285_at   | -0.01258661 | -0.38294023 | 0.70315047  | 0.824808421 |
| 237286_at   | 0.048692849 | 1.286754348 | 0.203242866 | 0.366056669 |
| 237287_at   | -0.06981786 | -2.10780097 | 0.039338378 | 0.105446578 |
| 237288_at   | 0.010759769 | 0.388206569 | 0.69927073  | 0.822134729 |
| 237289_at   | 0.032602977 | 1.104310362 | 0.273975008 | 0.450198216 |
| 237290_at   | 0.09581612  | 2.492561941 | 0.01553152  | 0.050060197 |
| 237291_at   | 0.003642883 | 0.116180311 | 0.907907106 | 0.951197533 |
| 237292_at   | 0.216976771 | 3.448298205 | 0.001051262 | 0.00531422  |
| 237293_at   | -0.0635121  | -1.62392184 | 0.109763148 | 0.233541281 |
| 237294_at   | -0.04884463 | -1.32422101 | 0.190574521 | 0.349427669 |
| 237295_at   | -0.01334116 | -0.51569118 | 0.60801147  | 0.757590293 |
| 237296_at   | 0.04110401  | 1.452437334 | 0.151716815 | 0.296653081 |
| 237297_at   | -0.07832926 | -1.68880748 | 0.096574398 | 0.211958111 |
| 237298_at   | 0.01878726  | 0.534125667 | 0.595276328 | 0.748146503 |
| 237299_at   | 0.095454578 | 2.99475362  | 0.004020152 | 0.016457938 |
| 237300_at   | 0.180970905 | 5.540980792 | 7.50E-07    | 1.26E-05    |
| 237301_at   | -0.22837305 | -3.26009516 | 0.001858001 | 0.008583604 |
| 237302_at   | -0.03576827 | -1.45301844 | 0.151555955 | 0.296435982 |
| 237303_at   | -0.05299649 | -1.69735649 | 0.094937872 | 0.209208785 |
| 237304_at   | 0.004221242 | 0.139700704 | 0.889375791 | 0.940719142 |
| 237305_at   | 0.219746203 | 4.284753413 | 6.90E-05    | 0.000539228 |
| 237306_at   | 0.00180601  | 0.064719492 | 0.948617748 | 0.973627237 |
| 237307_at   | -0.03121018 | -0.81104654 | 0.420622762 | 0.602592399 |
| 237308_at   | -0.04670825 | -1.63168576 | 0.1081119   | 0.230973615 |
| 237309_at   | -0.07934814 | -1.90310615 | 0.061945527 | 0.150812742 |
| 237310_at   | 0.097752332 | 2.312846031 | 0.024263534 | 0.072023502 |
| 237311_at   | -0.03618802 | -0.98485351 | 0.328747308 | 0.511234722 |
| 237312_at   | -0.02564216 | -0.65704222 | 0.513727576 | 0.684357592 |
| 237313_at   | -0.00785911 | -0.24516286 | 0.807187355 | 0.891462606 |
| 237314_at   | 0.169418041 | 2.644314299 | 0.010489208 | 0.036249898 |
| 237315_at   | 0.091230794 | 2.452019007 | 0.017206901 | 0.054495756 |
| 237316_at   | 0.058737229 | 1.481386934 | 0.143863982 | 0.285555564 |
| 237317_at   | -0.16584585 | -3.64947777 | 0.000561206 | 0.003158074 |
| 237318_at   | 0.059596244 | 1.70522831  | 0.093451196 | 0.20678917  |
| 237319_at   | -0.02035583 | -0.54239997 | 0.589601054 | 0.743984706 |
| 237320_at   | 0.017732514 | 0.54856524  | 0.58538905  | 0.740761295 |
| 237321_at   | -0.033075   | -0.82646573 | 0.411894362 | 0.594182978 |
| 237322_at   | -0.11158401 | -1.91787826 | 0.060006676 | 0.14706983  |
| 237323_at   | -0.02274219 | -0.74562708 | 0.45887492  | 0.637449891 |
| 237324_s_at | -0.03764519 | -0.79281731 | 0.431084315 | 0.611949948 |
| 237325_at   | 0.021185102 | 0.85674829  | 0.395076111 | 0.57769815  |
| 237326_at   | 0.025699783 | 0.628339583 | 0.53222432  | 0.699264149 |
| 237327_at   | -0.04470711 | -1.26953747 | 0.209271009 | 0.373676132 |
| 237328_at   | 0.061013088 | 1.85659627  | 0.068400573 | 0.162892705 |
| 237329_at   | -0.07678114 | -2.42034769 | 0.018626948 | 0.058141889 |
| 237330_at   | 0.285565416 | 4.814608932 | 1.08E-05    | 0.00011346  |
| 237331_s_at | 0.090072464 | 2.428492689 | 0.018252039 | 0.057223441 |
| 237332_at   | 0.021281146 | 0.644409707 | 0.521825827 | 0.690678193 |
| 237333_at   | 0.155598858 | 1.960492067 | 0.05470047  | 0.136910473 |
| 237334_at   | -0.05657056 | -1.74482792 | 0.086260354 | 0.194625795 |
| 237335_at   | 0.06169466  | 1.561876526 | 0.123704949 | 0.255434374 |
| 237336_at   | 0.068846234 | 2.064591543 | 0.043399064 | 0.11416074  |
| 237337_at   | 0.049938418 | 1.666087865 | 0.101036327 | 0.219306242 |
| 237338_at   | 0.027013094 | 0.679987177 | 0.499191729 | 0.672030838 |
| 237339_at   | 0.039687388 | 1.230600648 | 0.223391933 | 0.390542648 |
| 237340_at   | -0.21066125 | -4.69437971 | 1.65E-05    | 0.000162647 |
| 237341_at   | 0.014723633 | 0.375853933 | 0.708383502 | 0.828236997 |
| 237342_at   | -0.00820832 | -0.26737659 | 0.790118554 | 0.880523835 |
| 237343_at   | 0.031322052 | 0.880469387 | 0.382203931 | 0.564956445 |
| 237344_at   | -0.01302809 | -0.33133415 | 0.741574773 | 0.850111829 |
| 237345_at   | -0.0291725  | -0.76053049 | 0.449988645 | 0.629389807 |

|             |             |             |             |             |
|-------------|-------------|-------------|-------------|-------------|
| 237346_at   | 0.027201475 | 0.770620014 | 0.444029891 | 0.624241226 |
| 237347_at   | -0.06273157 | -1.59123405 | 0.116940744 | 0.24489554  |
| 237348_at   | -0.04764757 | -1.41516063 | 0.162316879 | 0.311569211 |
| 237349_at   | -6.42E-05   | -0.00150906 | 0.998801073 | 0.999427224 |
| 237350_at   | -0.04603741 | -1.24436232 | 0.218323229 | 0.384873058 |
| 237351_at   | 0.006641793 | 0.216777204 | 0.829135342 | 0.905188868 |
| 237352_at   | 0.015372755 | 0.470645715 | 0.639641935 | 0.780915564 |
| 237353_at   | 0.017000494 | 0.724597924 | 0.471583705 | 0.647921286 |
| 237354_at   | -0.06292659 | -1.88078607 | 0.064975784 | 0.156535914 |
| 237355_at   | -0.05294246 | -1.62422064 | 0.109699222 | 0.23346084  |
| 237356_at   | 0.001746613 | 0.034119639 | 0.97289777  | 0.986315832 |
| 237357_at   | 0.012388833 | 0.368408134 | 0.71389727  | 0.832064071 |
| 237358_at   | -0.04036328 | -1.31399248 | 0.193972352 | 0.354019417 |
| 237359_at   | -0.01420706 | -0.50003964 | 0.618920863 | 0.766036479 |
| 237360_at   | -0.00648347 | -0.19261234 | 0.847928941 | 0.91639398  |
| 237361_at   | -0.07185041 | -1.79865917 | 0.077226159 | 0.178615717 |
| 237362_at   | -0.03359385 | -0.81065228 | 0.420847396 | 0.602790062 |
| 237363_at   | -0.06545394 | -2.0912372  | 0.040854144 | 0.108759437 |
| 237364_at   | -0.06077672 | -1.90223464 | 0.062061556 | 0.151062309 |
| 237365_at   | -0.01926322 | -0.55467411 | 0.581229769 | 0.737314321 |
| 237366_at   | 0.006109141 | 0.202299004 | 0.840384083 | 0.912182323 |
| 237367_x_at | 0.024129965 | 0.650595207 | 0.517852127 | 0.687453521 |
| 237368_at   | -0.04151223 | -1.56565333 | 0.122817566 | 0.254032213 |
| 237369_at   | 0.046193905 | 1.179248632 | 0.243067626 | 0.413835366 |
| 237370_at   | 0.008622664 | 0.206391137 | 0.837201228 | 0.910192597 |
| 237371_at   | 0.052706357 | 1.400945235 | 0.166507007 | 0.317701881 |
| 237372_at   | 0.006937689 | 0.23431028  | 0.815561304 | 0.896738134 |
| 237373_at   | 0.100007521 | 2.836505422 | 0.006253984 | 0.023716849 |
| 237374_at   | -0.03853656 | -1.07534979 | 0.286628355 | 0.464635272 |
| 237375_at   | -0.04137743 | -1.10851506 | 0.272170958 | 0.44809049  |
| 237376_at   | 0.043658438 | 0.969124485 | 0.336468417 | 0.519302638 |
| 237377_at   | 0.138163928 | 2.319240528 | 0.023889967 | 0.071131938 |
| 237378_at   | -0.01566471 | -0.4884558  | 0.62705101  | 0.771743447 |
| 237379_at   | -0.02185922 | -0.64734615 | 0.519937388 | 0.689097054 |
| 237380_at   | -0.08680358 | -1.58878194 | 0.117494084 | 0.245800946 |
| 237381_at   | 0.007376108 | 0.197980704 | 0.843745754 | 0.91423342  |
| 237382_at   | 0.197027417 | 4.323115412 | 6.05E-05    | 0.000482677 |
| 237383_at   | 0.211201231 | 4.490466756 | 3.39E-05    | 0.000297706 |
| 237384_x_at | -0.4723162  | -5.93333104 | 1.70E-07    | 3.82E-06    |
| 237385_at   | -0.08534931 | -2.13186928 | 0.037223224 | 0.101000567 |
| 237386_at   | -0.09913074 | -2.99157877 | 0.004056514 | 0.016582247 |
| 237387_at   | -0.00657755 | -0.15095264 | 0.880531813 | 0.936033675 |
| 237388_at   | 0.096203787 | 2.120982876 | 0.038167317 | 0.103024324 |
| 237389_at   | -0.05374993 | -1.55099714 | 0.126289843 | 0.259596433 |
| 237390_at   | 0.212358668 | 3.275132338 | 0.001776512 | 0.008258361 |
| 237391_at   | -0.0493662  | -1.8670176  | 0.066906891 | 0.160152257 |
| 237392_at   | 0.009808378 | 0.266848956 | 0.790522827 | 0.880719087 |
| 237393_at   | -0.21571338 | -5.57397078 | 6.63E-07    | 1.13E-05    |
| 237394_at   | -0.00577467 | -0.17613612 | 0.860794645 | 0.92420438  |
| 237395_at   | -0.11504028 | -3.76090108 | 0.000393285 | 0.002337947 |
| 237396_at   | 0.053867865 | 1.58180444  | 0.119080159 | 0.248039266 |
| 237397_at   | -0.04338096 | -1.44160018 | 0.154741208 | 0.300917853 |
| 237398_at   | 0.045738285 | 1.292995028 | 0.201090144 | 0.363238217 |
| 237399_at   | -0.03420777 | -0.6904694  | 0.492626462 | 0.666440737 |
| 237400_at   | 0.084624029 | 1.420757289 | 0.160689775 | 0.309296155 |
| 237401_at   | -0.02892485 | -0.98539506 | 0.328483582 | 0.511026291 |
| 237402_at   | -0.00938911 | -0.3322618  | 0.740877865 | 0.849618022 |
| 237403_at   | 0.015745984 | 0.623731098 | 0.535226073 | 0.701640375 |
| 237404_at   | -0.01586294 | -0.43844056 | 0.66268002  | 0.796356426 |
| 237405_at   | -0.02141657 | -0.86141979 | 0.392520093 | 0.575296231 |
| 237406_at   | -0.01987037 | -0.60319756 | 0.548706234 | 0.711936383 |
| 237407_at   | 0.00971539  | 0.315691703 | 0.753358778 | 0.858074132 |
| 237408_at   | -0.00683455 | -0.2805275  | 0.780061416 | 0.874272867 |
| 237409_at   | 0.00455804  | 0.112574649 | 0.91075276  | 0.952907881 |
| 237410_x_at | 0.078839754 | 2.981981834 | 0.004168298 | 0.01697554  |
| 237411_at   | 0.004257703 | 0.147747536 | 0.883049505 | 0.937448209 |
| 237412_at   | 0.046765217 | 1.273431857 | 0.207895971 | 0.371874595 |
| 237413_at   | 0.076096257 | 1.776787993 | 0.080796583 | 0.185092054 |
| 237414_at   | 0.012429061 | 0.343166563 | 0.732701947 | 0.844028391 |
| 237415_at   | -0.05028532 | -1.32258263 | 0.191115733 | 0.350155551 |
| 237416_at   | 0.010165822 | 0.414864287 | 0.679757069 | 0.808127799 |
| 237417_at   | -0.06205431 | -1.55637084 | 0.125007733 | 0.257565147 |
| 237418_at   | 0.166129535 | 4.048839518 | 0.000153149 | 0.001051549 |
| 237419_at   | 0.13572783  | 3.449417884 | 0.001047652 | 0.005298965 |
| 237420_at   | -0.02245049 | -0.82626531 | 0.412007101 | 0.594288063 |

|             |             |             |             |             |
|-------------|-------------|-------------|-------------|-------------|
| 237421_at   | 0.033593906 | 0.960277674 | 0.340863334 | 0.52379873  |
| 237422_at   | -0.02759105 | -0.84764181 | 0.400088327 | 0.582540256 |
| 237423_at   | -0.18792003 | -3.91167538 | 0.000241027 | 0.001547031 |
| 237424_at   | -0.01061732 | -0.34611463 | 0.730496902 | 0.842817212 |
| 237425_at   | -0.0072085  | -0.23611942 | 0.814163824 | 0.89585281  |
| 237426_at   | 0.004345515 | 0.127686372 | 0.898834598 | 0.945982552 |
| 237427_at   | -0.0257559  | -1.06196674 | 0.292610356 | 0.471108595 |
| 237428_at   | -0.04251842 | -1.21966825 | 0.227479701 | 0.394969806 |
| 237429_at   | 0.03688686  | 1.289470895 | 0.202303687 | 0.36479496  |
| 237430_at   | -0.02355991 | -0.98411411 | 0.329107608 | 0.511492461 |
| 237431_at   | -0.01686982 | -0.647688   | 0.519717781 | 0.688989887 |
| 237432_at   | 0.027399048 | 0.759838694 | 0.450398907 | 0.629845363 |
| 237433_at   | -0.01083485 | -0.4293459  | 0.669246904 | 0.800759869 |
| 237434_x_at | -0.2107048  | -4.36042674 | 5.32E-05    | 0.000434863 |
| 237435_at   | -0.01115145 | -0.66412451 | 0.509216896 | 0.680315722 |
| 237436_at   | 0.010800829 | 0.289477545 | 0.773238288 | 0.870160789 |
| 237437_s_at | 0.201665365 | 3.496772034 | 0.000905286 | 0.004691985 |
| 237438_at   | 0.0273378   | 0.914811049 | 0.364042023 | 0.547266879 |
| 237439_at   | 0.049785271 | 1.145865592 | 0.256511301 | 0.430088278 |
| 237440_at   | 0.054222748 | 1.725424177 | 0.089724465 | 0.200518342 |
| 237441_at   | 0.031243821 | 0.59941564  | 0.551207672 | 0.713900753 |
| 237442_at   | -0.02973983 | -0.61459105 | 0.541205265 | 0.706580891 |
| 237443_at   | 0.034089617 | 0.790562357 | 0.432389083 | 0.613256732 |
| 237444_at   | 0.134573184 | 2.641311417 | 0.010572449 | 0.03646989  |
| 237445_at   | 0.067795066 | 1.747313754 | 0.085824678 | 0.193867904 |
| 237446_at   | 0.017433788 | 0.510565173 | 0.611574701 | 0.760313125 |
| 237447_at   | 0.022440013 | 0.503262355 | 0.616667411 | 0.764199754 |
| 237448_at   | 0.081054651 | 2.156310369 | 0.035177612 | 0.096637766 |
| 237449_at   | -0.00127553 | -0.05213154 | 0.958601285 | 0.978902041 |
| 237450_at   | -0.16410996 | -3.73396069 | 0.000428805 | 0.00251333  |
| 237451_x_at | -0.03124642 | -1.13009568 | 0.263042999 | 0.43770637  |
| 237452_at   | 0.171963625 | 4.103897974 | 0.000127397 | 0.000905475 |
| 237453_at   | 0.123351354 | 3.886946015 | 0.000261351 | 0.001653967 |
| 237454_at   | 0.037345653 | 0.744718341 | 0.45942001  | 0.637969149 |
| 237455_at   | -0.01645553 | -0.49111617 | 0.625179659 | 0.770284491 |
| 237456_at   | 0.344163366 | 4.337409675 | 5.76E-05    | 0.000463849 |
| 237457_at   | -0.03480716 | -0.95150049 | 0.345260763 | 0.528239157 |
| 237458_at   | -0.039921   | -1.36762877 | 0.176653752 | 0.331472395 |
| 237459_at   | 0.191024833 | 2.756026521 | 0.007786775 | 0.028445852 |
| 237460_x_at | -0.05080132 | -1.70036382 | 0.094367627 | 0.208321956 |
| 237461_at   | -0.0140785  | -0.50785409 | 0.613463077 | 0.761728442 |
| 237462_at   | -0.07448033 | -2.04898495 | 0.044952556 | 0.117376703 |
| 237463_at   | -0.0968492  | -1.70704186 | 0.093111418 | 0.206241538 |
| 237464_at   | 0.002919116 | 0.094184574 | 0.925284028 | 0.96085822  |
| 237465_at   | 0.190990964 | 2.829827507 | 0.006369696 | 0.024069879 |
| 237466_s_at | 0.254698502 | 2.852283608 | 0.005988255 | 0.0228702   |
| 237467_at   | -0.00124855 | -0.04150146 | 0.967037289 | 0.983296488 |
| 237468_at   | 0.092942766 | 2.159781026 | 0.034895261 | 0.096030726 |
| 237469_at   | -0.07047768 | -2.41569669 | 0.018844117 | 0.058721326 |
| 237470_at   | -0.12700571 | -1.66762094 | 0.100730034 | 0.21877278  |
| 237471_at   | 0.010423912 | 0.42636624  | 0.671404082 | 0.802080463 |
| 237472_at   | -0.13200135 | -2.51233726 | 0.014768998 | 0.047958733 |
| 237473_at   | 0.047900174 | 1.817325928 | 0.074284058 | 0.173354034 |
| 237474_at   | 0.065850839 | 2.520395005 | 0.014468121 | 0.047135827 |
| 237475_x_at | 0.357081935 | 6.750896111 | 7.36E-09    | 3.61E-07    |
| 237476_at   | -0.13472667 | -3.36739605 | 0.001345765 | 0.006538916 |
| 237477_at   | -0.01869557 | -0.74713533 | 0.45797105  | 0.636649418 |
| 237478_at   | -0.10481729 | -2.65561262 | 0.010181345 | 0.035391199 |
| 237479_at   | 0.027478704 | 0.890285963 | 0.37695504  | 0.559659645 |
| 237480_at   | -0.05894504 | -1.33197954 | 0.188027321 | 0.346200183 |
| 237481_at   | 0.014639823 | 0.614495838 | 0.541267734 | 0.706580891 |
| 237482_s_at | -0.0103427  | -0.29287252 | 0.770654769 | 0.868746406 |
| 237483_at   | 0.104319499 | 1.35517781  | 0.180564849 | 0.336817239 |
| 237484_at   | 0.018660208 | 0.575352202 | 0.567257168 | 0.726976669 |
| 237485_at   | -0.00977212 | -0.25926218 | 0.7963421   | 0.884306332 |
| 237486_at   | -0.02168385 | -0.6958574  | 0.489270388 | 0.663646004 |
| 237487_at   | -0.01068296 | -0.35542285 | 0.723549758 | 0.838351286 |
| 237488_at   | -0.05748591 | -1.61484579 | 0.111719318 | 0.236662773 |
| 237489_at   | 0.01034702  | 0.471736056 | 0.638867997 | 0.780458356 |
| 237490_at   | -0.08736623 | -3.0010353  | 0.0039491   | 0.016226273 |
| 237491_at   | -0.15665333 | -2.44581362 | 0.017477211 | 0.055212521 |
| 237492_at   | -0.97806329 | -6.38104471 | 3.07E-08    | 1.01E-06    |
| 237493_at   | 0.003009141 | 0.111951695 | 0.911244527 | 0.952996219 |
| 237494_at   | -0.03117505 | -1.10452397 | 0.273883159 | 0.450092879 |
| 237495_at   | -0.02152757 | -0.73903213 | 0.462839195 | 0.64078589  |

|             |             |             |             |             |
|-------------|-------------|-------------|-------------|-------------|
| 237496_at   | -0.02653776 | -0.67265252 | 0.503813804 | 0.675905698 |
| 237497_at   | 0.01799963  | 0.487471425 | 0.627744065 | 0.772294375 |
| 237498_at   | -0.31868339 | -4.6546832  | 1.90E-05    | 0.000183269 |
| 237499_at   | -0.04523834 | -1.40808169 | 0.164393153 | 0.314676152 |
| 237500_at   | -0.0842455  | -2.61359685 | 0.011369632 | 0.038714788 |
| 237501_at   | 0.000312235 | 0.00504719  | 0.995990095 | 0.99802776  |
| 237502_at   | 0.179205914 | 3.795535043 | 0.000351747 | 0.002124937 |
| 237503_at   | -0.00526322 | -0.19030521 | 0.849728075 | 0.917539615 |
| 237504_at   | -0.01793534 | -0.40445854 | 0.687348902 | 0.813511219 |
| 237505_at   | -0.00043056 | -0.01081732 | 0.991405963 | 0.995967054 |
| 237506_at   | 0.003013975 | 0.10818371  | 0.914219752 | 0.954254927 |
| 237507_at   | 0.048400908 | 1.376227489 | 0.173990755 | 0.327897699 |
| 237508_at   | -0.05947859 | -1.5056836  | 0.13752314  | 0.276406915 |
| 237509_at   | -1.16395377 | -6.57792131 | 1.44E-08    | 5.85E-07    |
| 237510_at   | -0.03019001 | -0.92073423 | 0.36096636  | 0.544073002 |
| 237511_at   | 0.014026329 | 0.533466771 | 0.595729357 | 0.74854747  |
| 237512_at   | -0.08842408 | -2.00241349 | 0.049877373 | 0.127218328 |
| 237513_at   | 0.047412848 | 1.055342508 | 0.295602877 | 0.474586001 |
| 237514_at   | -0.07092226 | -2.16890994 | 0.034162044 | 0.094466656 |
| 237515_at   | -0.06937783 | -1.0115815  | 0.315899298 | 0.497188739 |
| 237516_at   | 0.014132259 | 0.424437455 | 0.672801944 | 0.803164285 |
| 237517_at   | 0.020362362 | 0.460519424 | 0.646848853 | 0.785773626 |
| 237518_at   | 0.035780919 | 1.327454889 | 0.189509657 | 0.348169267 |
| 237519_at   | 0.017247925 | 0.49709883  | 0.620980407 | 0.767274584 |
| 237520_x_at | -0.00283181 | -0.13456959 | 0.893413588 | 0.942985632 |
| 237521_x_at | 0.002549082 | 0.091368493 | 0.927511593 | 0.962062457 |
| 237522_at   | 0.041656222 | 1.320921284 | 0.191665715 | 0.351004923 |
| 237523_at   | -0.01088537 | -0.26723914 | 0.790223867 | 0.880523835 |
| 237524_at   | 0.018115704 | 0.455578951 | 0.650377433 | 0.788163134 |
| 237525_at   | 0.094352133 | 2.811753682 | 0.006692854 | 0.025078983 |
| 237526_at   | -0.04440668 | -1.23664037 | 0.221156844 | 0.388110564 |
| 237527_at   | -0.05652936 | -1.44999208 | 0.152395161 | 0.297527713 |
| 237528_at   | -0.02449242 | -1.31009498 | 0.195279006 | 0.35564238  |
| 237529_at   | -0.00931787 | -0.29331301 | 0.770319753 | 0.868580271 |
| 237530_at   | -0.00056594 | -0.00869686 | 0.993090554 | 0.996975071 |
| 237531_at   | -0.01361648 | -0.3449717  | 0.731351502 | 0.843246563 |
| 237532_at   | -0.00193163 | -0.073726   | 0.941479644 | 0.969641107 |
| 237533_at   | 0.063393393 | 1.882693628 | 0.064711994 | 0.156077087 |
| 237534_at   | 0.011209866 | 0.194479184 | 0.846473734 | 0.915618369 |
| 237535_x_at | 0.090228387 | 2.41383556  | 0.018931653 | 0.058965119 |
| 237536_at   | 0.01767212  | 0.520474381 | 0.604695117 | 0.754880682 |
| 237537_at   | 0.015156842 | 0.634042437 | 0.528521888 | 0.696057175 |
| 237538_at   | 0.027915739 | 1.005279351 | 0.318897827 | 0.500323491 |
| 237539_at   | -0.00474145 | -0.10703147 | 0.915129814 | 0.954807244 |
| 237540_at   | -0.02494791 | -0.6678172  | 0.506873501 | 0.678314792 |
| 237541_at   | -0.05298422 | -1.50997325 | 0.136426952 | 0.27471022  |
| 237542_at   | 0.021896728 | 0.58428222  | 0.561274414 | 0.722687297 |
| 237543_at   | -0.01941983 | -0.60678322 | 0.546339929 | 0.710313428 |
| 237544_at   | -0.00924485 | -0.22744979 | 0.820866152 | 0.900450397 |
| 237545_at   | 0.009155851 | 0.30097458  | 0.764499829 | 0.864615895 |
| 237546_at   | -0.00430031 | -0.11031403 | 0.912537482 | 0.953749891 |
| 237547_at   | -0.01292178 | -0.30603352 | 0.76066437  | 0.862255207 |
| 237548_at   | -0.00713821 | -0.22012061 | 0.826542716 | 0.903808343 |
| 237549_at   | 0.166138567 | 3.23981543  | 0.001973489 | 0.009006347 |
| 237550_at   | -0.20707011 | -3.96588483 | 0.000201658 | 0.001326148 |
| 237551_at   | 0.028373348 | 0.814230722 | 0.418811207 | 0.601176013 |
| 237552_at   | -0.08415149 | -2.8238916  | 0.006474206 | 0.024394674 |
| 237553_at   | -0.11772026 | -2.9321655  | 0.00479603  | 0.019062981 |
| 237554_at   | 0.037450932 | 1.335574194 | 0.186855936 | 0.34475356  |
| 237555_at   | 0.054839108 | 1.69170655  | 0.096016858 | 0.211034987 |
| 237556_at   | 0.003517521 | 0.132303101 | 0.895198055 | 0.943901087 |
| 237557_at   | 0.005689017 | 0.108548949 | 0.913931302 | 0.954246988 |
| 237558_at   | -0.03757035 | -0.95319277 | 0.344410047 | 0.527244428 |
| 237559_at   | -0.0316853  | -0.80669423 | 0.423106517 | 0.604948379 |
| 237560_at   | 0.154325739 | 2.224977053 | 0.029948257 | 0.08502398  |
| 237561_x_at | 0.156459132 | 4.674932587 | 1.77E-05    | 0.00017233  |
| 237562_at   | 0.032977982 | 1.087806856 | 0.281136861 | 0.458360156 |
| 237563_s_at | 0.034280809 | 0.975197898 | 0.333473009 | 0.516110034 |
| 237564_at   | 0.045276406 | 1.228667339 | 0.224110873 | 0.391229462 |
| 237565_at   | -0.04488608 | -1.43002405 | 0.158023503 | 0.305479752 |
| 237566_at   | -0.02288632 | -0.8134522  | 0.41925369  | 0.601549316 |
| 237567_at   | 0.043971817 | 1.213403609 | 0.229846645 | 0.397750571 |
| 237568_at   | 0.060748429 | 1.71718525  | 0.091229702 | 0.203059806 |
| 237569_at   | -0.00349859 | -0.10590242 | 0.916021672 | 0.955354256 |
| 237570_x_at | 0.02138885  | 0.508506757 | 0.613008229 | 0.76135404  |

|             |             |             |             |             |
|-------------|-------------|-------------|-------------|-------------|
| 237571_at   | 0.022120691 | 0.624961008 | 0.534424111 | 0.701041455 |
| 237572_at   | 0.017012741 | 0.498006263 | 0.620344576 | 0.767058041 |
| 237573_at   | 0.005378347 | 0.186756274 | 0.852497165 | 0.919064125 |
| 237574_at   | 0.011368322 | 0.343405168 | 0.732523394 | 0.843956988 |
| 237575_at   | 0.017190525 | 0.642195659 | 0.523252079 | 0.691992127 |
| 237576_x_at | 0.023930229 | 0.733376765 | 0.466254225 | 0.643672452 |
| 237577_at   | 0.00216132  | 0.065213298 | 0.948226267 | 0.973493714 |
| 237578_at   | -0.00768085 | -0.1873702  | 0.852018008 | 0.918813523 |
| 237579_at   | -0.05451529 | -1.29158625 | 0.201574607 | 0.363814406 |
| 237580_at   | -0.03573939 | -1.2582684  | 0.213287962 | 0.378583067 |
| 237581_at   | 0.000589809 | 0.016928064 | 0.986551542 | 0.993439507 |
| 237582_at   | 0.033208906 | 0.98991071  | 0.32629004  | 0.508457269 |
| 237583_at   | 0.068924972 | 1.850670992 | 0.069262309 | 0.164436801 |
| 237584_at   | -0.12982367 | -3.2542898  | 0.001890394 | 0.008699977 |
| 237585_at   | 0.055111515 | 0.788129562 | 0.433799381 | 0.614574334 |
| 237586_at   | 0.177873094 | 2.970765442 | 0.004302576 | 0.017431849 |
| 237587_at   | -0.01938745 | -0.47644817 | 0.635527914 | 0.777781191 |
| 237588_at   | -0.01087466 | -0.30586393 | 0.760792848 | 0.862278199 |
| 237589_at   | -0.03647531 | -1.21810534 | 0.228068536 | 0.395580961 |
| 237590_at   | -0.01397996 | -0.29452283 | 0.769399851 | 0.867939273 |
| 237591_at   | 0.233913583 | 3.416903977 | 0.001157438 | 0.005755255 |
| 237592_at   | -0.03992762 | -0.9703536  | 0.335860789 | 0.518666616 |
| 237593_at   | -0.02961746 | -1.09621338 | 0.277472637 | 0.454108946 |
| 237594_at   | 0.164368854 | 2.705327608 | 0.008922353 | 0.031803942 |
| 237595_at   | -0.08217364 | -2.54597905 | 0.013549206 | 0.044692679 |
| 237596_at   | -0.01032458 | -0.33618674 | 0.737931597 | 0.847914614 |
| 237597_at   | -0.05093489 | -1.80702711 | 0.07589544  | 0.176231049 |
| 237598_at   | -0.04143248 | -1.3305674  | 0.188489013 | 0.346735995 |
| 237599_at   | -0.03624796 | -1.03673727 | 0.304119996 | 0.483984291 |
| 237600_at   | 0.228950028 | 3.833250864 | 0.000311306 | 0.001919815 |
| 237601_at   | -0.03933529 | -1.22325307 | 0.226133304 | 0.393641412 |
| 237602_at   | -0.5412247  | -5.64486405 | 5.08E-07    | 9.16E-06    |
| 237603_at   | -0.03388333 | -0.66049105 | 0.511528372 | 0.68228209  |
| 237604_at   | -4.71E-05   | -0.00107934 | 0.999142483 | 0.999548259 |
| 237605_at   | -0.07511562 | -2.54045578 | 0.01374299  | 0.045215086 |
| 237606_at   | 0.00488473  | 0.164019336 | 0.870280662 | 0.930028413 |
| 237607_at   | 0.003688855 | 0.159106041 | 0.87413274  | 0.932239193 |
| 237608_at   | -0.08132357 | -2.47717514 | 0.01614921  | 0.051704312 |
| 237609_at   | 0.004919909 | 0.160497576 | 0.873041447 | 0.931594402 |
| 237610_at   | 0.003394325 | 0.084217097 | 0.933171041 | 0.965310623 |
| 237611_at   | -0.0917203  | -2.76575727 | 0.007584632 | 0.027810243 |
| 237612_at   | 0.023113088 | 0.685565323 | 0.495692079 | 0.668804203 |
| 237613_at   | -0.07697281 | -1.81216764 | 0.075087518 | 0.174757275 |
| 237614_at   | -0.04826    | -1.66672218 | 0.100909505 | 0.219105455 |
| 237615_at   | -0.10803918 | -3.33051121 | 0.001504544 | 0.007181575 |
| 237616_at   | 0.048870029 | 1.30191329  | 0.19804347  | 0.359143219 |
| 237617_at   | -0.04233808 | -1.40901727 | 0.164117573 | 0.314256035 |
| 237618_at   | 0.037848197 | 1.174292965 | 0.245030583 | 0.416327837 |
| 237619_at   | -0.02360896 | -0.67540427 | 0.502077027 | 0.674284106 |
| 237620_at   | -0.00516479 | -0.21602358 | 0.829720004 | 0.905569088 |
| 237621_at   | -0.00213044 | -0.05468974 | 0.956571783 | 0.977772055 |
| 237622_at   | -0.05646301 | -0.77242855 | 0.442966693 | 0.623196003 |
| 237623_at   | -0.00719593 | -0.20165378 | 0.840886182 | 0.912511783 |
| 237624_at   | 0.167940112 | 3.99791866  | 0.000181388 | 0.001214287 |
| 237625_s_at | 0.052008277 | 2.300436987 | 0.025003317 | 0.073739491 |
| 237626_at   | 0.200020723 | 4.829499717 | 1.02E-05    | 0.000108688 |
| 237627_at   | 0.110263415 | 3.264388927 | 0.00183438  | 0.008487641 |
| 237628_at   | 0.060469957 | 2.400033924 | 0.019592257 | 0.060563784 |
| 237629_at   | 0.022236322 | 0.679189612 | 0.499693208 | 0.672416261 |
| 237630_s_at | -0.01146771 | -0.35411506 | 0.724524423 | 0.839045541 |
| 237631_at   | -0.00045469 | -0.01217388 | 0.990328265 | 0.995408013 |
| 237632_at   | -0.14139279 | -3.4059433  | 0.001196845 | 0.005922864 |
| 237633_at   | 0.083575078 | 2.408652098 | 0.019177376 | 0.059577039 |
| 237634_at   | -0.01336562 | -0.55762482 | 0.579225845 | 0.735902211 |
| 237635_at   | -0.01106929 | -0.3156883  | 0.753361347 | 0.858074132 |
| 237636_at   | -0.00415397 | -0.12848562 | 0.898204881 | 0.945478623 |
| 237637_at   | -0.05251494 | -1.59749978 | 0.115536358 | 0.242693689 |
| 237638_at   | -0.01963298 | -0.55522782 | 0.580853475 | 0.737086836 |
| 237639_at   | -0.0331332  | -1.1698272  | 0.246809239 | 0.418483896 |
| 237640_at   | 0.048945183 | 1.178642797 | 0.243306989 | 0.414116687 |
| 237641_at   | -0.07257711 | -1.29217192 | 0.201373093 | 0.363509422 |
| 237642_at   | -0.00128046 | -0.03946436 | 0.968654389 | 0.984134715 |
| 237643_at   | -0.04052237 | -1.01351049 | 0.3149853   | 0.496265468 |
| 237644_at   | -0.00289679 | -0.09244118 | 0.926663012 | 0.961574924 |
| 237645_at   | 0.025043685 | 1.268217142 | 0.209738723 | 0.374301921 |

|             |              |             |             |             |
|-------------|--------------|-------------|-------------|-------------|
| 237646_x_at | -0.05283209  | -0.97114469 | 0.335470089 | 0.518280877 |
| 237647_at   | 0.016192186  | 0.513008536 | 0.609875066 | 0.759023572 |
| 237648_x_at | -0.03840888  | -1.85234212 | 0.069018349 | 0.163994261 |
| 237649_at   | -0.02684444  | -1.22537005 | 0.22534095  | 0.392675079 |
| 237650_at   | -0.04474492  | -1.36926036 | 0.176146075 | 0.330839268 |
| 237651_x_at | -0.03808414  | -1.41162713 | 0.163350713 | 0.313069602 |
| 237652_at   | -0.08036346  | -2.08462769 | 0.041473013 | 0.110000706 |
| 237653_at   | -0.00723842  | -0.21455283 | 0.830861283 | 0.906320384 |
| 237654_at   | 0.053290699  | 1.239245359 | 0.220197921 | 0.387169938 |
| 237655_at   | -0.08059305  | -2.88871168 | 0.005414113 | 0.021028052 |
| 237656_at   | -0.03169299  | -1.04171824 | 0.301823581 | 0.481444053 |
| 237657_at   | -0.01133091  | -0.3084052  | 0.758868337 | 0.861205587 |
| 237658_at   | -0.03260334  | -1.05009968 | 0.297986199 | 0.477110996 |
| 237659_at   | 0.028655401  | 0.781534536 | 0.437636231 | 0.618074649 |
| 237660_at   | -0.05504856  | -1.66547354 | 0.101159275 | 0.219509144 |
| 237661_at   | -0.0054693   | -0.14060383 | 0.8886654   | 0.940318537 |
| 237662_at   | 0.047550995  | 1.127600906 | 0.264086999 | 0.438952056 |
| 237663_at   | 0.026044591  | 0.937068577 | 0.352571542 | 0.535725364 |
| 237664_at   | -0.02269689  | -0.80709287 | 0.422878658 | 0.604758023 |
| 237665_at   | 0.003743737  | 0.1102171   | 0.912614018 | 0.953749891 |
| 237666_at   | -0.07032722  | -1.77810151 | 0.080578339 | 0.184743608 |
| 237667_at   | 0.009083363  | 0.284229597 | 0.777236953 | 0.872311137 |
| 237668_at   | -0.01201484  | -0.48757558 | 0.627670722 | 0.772225401 |
| 237669_at   | -0.05659298  | -1.52677037 | 0.132201012 | 0.268499325 |
| 237670_at   | -0.02480655  | -0.90198855 | 0.370757598 | 0.554020193 |
| 237671_at   | 0.034990544  | 1.203098031 | 0.233779364 | 0.402560968 |
| 237672_at   | -0.00765555  | -0.23195415 | 0.817382208 | 0.898006451 |
| 237673_at   | -0.10231122  | -3.54337587 | 0.000783264 | 0.004160896 |
| 237674_at   | -0.04068898  | -1.0094749  | 0.316899488 | 0.498131399 |
| 237675_at   | 0.130235051  | 2.16646227  | 0.034357299 | 0.094871574 |
| 237676_at   | -0.00023487  | -0.00710496 | 0.994355258 | 0.997361881 |
| 237677_at   | -0.015467371 | 0.466049039 | 0.642909138 | 0.783083375 |
| 237678_at   | -0.03791884  | -0.95662352 | 0.342689602 | 0.525654986 |
| 237679_at   | 0.019297327  | 0.658526689 | 0.512780362 | 0.68352362  |
| 237680_at   | 0.070478468  | 1.303106591 | 0.197638453 | 0.358621914 |
| 237681_at   | 0.118381717  | 4.166716881 | 0.000103117 | 0.000756607 |
| 237682_at   | -0.05429998  | -2.0457488  | 0.04528064  | 0.118060929 |
| 237683_s_at | -0.08303239  | -2.11046937 | 0.039098827 | 0.104892537 |
| 237684_at   | -0.03074476  | -0.97926889 | 0.331475107 | 0.514045785 |
| 237685_at   | 0.031476406  | 0.948717124 | 0.346662965 | 0.529695416 |
| 237686_at   | -0.03683965  | -1.09738093 | 0.276966379 | 0.453529528 |
| 237687_at   | -0.15485155  | -2.93728017 | 0.004727753 | 0.018838509 |
| 237688_at   | 0.034307304  | 1.129606383 | 0.263247526 | 0.437970378 |
| 237689_at   | 0.021238493  | 0.615259144 | 0.540767061 | 0.706231889 |
| 237690_at   | 0.008561084  | 0.466267051 | 0.642754019 | 0.78292457  |
| 237691_x_at | -0.01615328  | -0.71396607 | 0.478083998 | 0.653710572 |
| 237692_at   | -0.01772352  | -0.43804503 | 0.662965072 | 0.796576239 |
| 237693_at   | -0.05647927  | -2.36314714 | 0.021460278 | 0.065218465 |
| 237694_at   | 0.051781238  | 1.267683799 | 0.209927875 | 0.374519843 |
| 237695_at   | 0.008149687  | 0.193414651 | 0.847303472 | 0.916094609 |
| 237696_at   | 0.007328979  | 0.23232313  | 0.817096981 | 0.897902588 |
| 237697_at   | 0.034137254  | 0.937401049 | 0.352401998 | 0.535631121 |
| 237698_at   | -0.03617476  | -0.89207963 | 0.376000924 | 0.558786782 |
| 237699_at   | -0.01412998  | -0.43896989 | 0.662298626 | 0.796129925 |
| 237700_at   | -0.10736955  | -3.04656689 | 0.003468023 | 0.014536942 |
| 237701_at   | -0.01440287  | -0.33215026 | 0.740961644 | 0.849670493 |
| 237702_at   | -0.06575721  | -2.0180349  | 0.04817605  | 0.123868602 |
| 237703_at   | 0.067272725  | 1.909421525 | 0.061110215 | 0.149178542 |
| 237704_at   | 0.061629607  | 1.713883785 | 0.09183869  | 0.204100185 |
| 237705_at   | 0.008473496  | 0.269744954 | 0.788304649 | 0.879168302 |
| 237706_at   | 0.012560348  | 0.468350853 | 0.641272175 | 0.782025575 |
| 237707_at   | -0.02221602  | -0.77962117 | 0.438753124 | 0.619158544 |
| 237708_at   | -0.05226072  | -1.49237631 | 0.140968089 | 0.281381924 |
| 237709_at   | -0.08684163  | -1.95517555 | 0.055339769 | 0.138162391 |
| 237710_at   | 0.027965471  | 0.685929734 | 0.495463922 | 0.668597288 |
| 237711_at   | -0.04029029  | -0.92935344 | 0.356520724 | 0.539675361 |
| 237712_at   | -0.03263173  | -1.22593761 | 0.225128865 | 0.392403733 |
| 237713_at   | 0.054866709  | 1.48485289  | 0.142945632 | 0.284225039 |
| 237714_at   | -0.02051163  | -0.67496473 | 0.502354226 | 0.674575297 |
| 237715_at   | -0.09577274  | -2.17181755 | 0.033931363 | 0.093939199 |
| 237716_at   | 0.129562691  | 3.519805179 | 0.000842879 | 0.004420081 |
| 237717_x_at | -0.05421584  | -2.4685269  | 0.016506027 | 0.052620542 |
| 237718_at   | -0.03218647  | -0.76497455 | 0.447358321 | 0.627064926 |
| 237719_x_at | -0.70055127  | -6.93830866 | 3.56E-09    | 2.18E-07    |
| 237720_at   | -0.02094184  | -0.72362161 | 0.472178531 | 0.64843298  |

|             |             |             |             |             |
|-------------|-------------|-------------|-------------|-------------|
| 237721_s_at | -0.03236724 | -1.0596543  | 0.29365263  | 0.472201252 |
| 237722_at   | -0.06755914 | -1.93556447 | 0.057753468 | 0.142760951 |
| 237723_at   | -0.10733377 | -2.98858775 | 0.00409105  | 0.016710411 |
| 237724_at   | 0.00121031  | 0.024331651 | 0.980670781 | 0.990288496 |
| 237725_x_at | 0.041911707 | 1.350937547 | 0.181911753 | 0.338580712 |
| 237726_at   | -0.00692291 | -0.16545071 | 0.869159035 | 0.929166893 |
| 237727_at   | 0.021326304 | 0.688883178 | 0.493616893 | 0.667233045 |
| 237728_at   | -0.05988423 | -1.34587162 | 0.183530934 | 0.340636075 |
| 237729_at   | -0.01738395 | -0.6317024  | 0.530039471 | 0.697357121 |
| 237730_at   | -0.08181476 | -2.12185931 | 0.038090545 | 0.102860582 |
| 237731_at   | 0.040813144 | 1.343945823 | 0.184149326 | 0.341356942 |
| 237732_at   | 0.008677981 | 0.180717148 | 0.857213515 | 0.922013584 |
| 237733_at   | 0.142144048 | 2.352907385 | 0.022006304 | 0.066572862 |
| 237734_s_at | 0.009742222 | 0.273633489 | 0.785329012 | 0.877537623 |
| 237735_at   | -0.04643858 | -1.07458843 | 0.28696638  | 0.465082008 |
| 237736_at   | 0.008917709 | 0.276358426 | 0.783245713 | 0.876084128 |
| 237737_at   | -0.12882779 | -2.9269548  | 0.004866529 | 0.019293436 |
| 237738_at   | -0.05672789 | -1.6962703  | 0.095144527 | 0.209581508 |
| 237739_at   | -0.02005226 | -0.45195171 | 0.65297321  | 0.789596004 |
| 237740_at   | -0.01711504 | -0.34800071 | 0.729087383 | 0.84192996  |
| 237741_at   | 0.218699267 | 4.00420048  | 0.00017765  | 0.001192123 |
| 237742_at   | -0.1669649  | -2.76620152 | 0.00757552  | 0.027787683 |
| 237743_at   | 0.030364192 | 0.753976115 | 0.453884365 | 0.63315438  |
| 237744_at   | 0.053940318 | 1.525370545 | 0.132549169 | 0.268962256 |
| 237745_at   | -0.58095751 | -6.36463047 | 3.27E-08    | 1.06E-06    |
| 237746_at   | -0.10693769 | -1.54534325 | 0.12765012  | 0.261598458 |
| 237747_at   | 0.341561849 | 6.199472484 | 6.17E-08    | 1.74E-06    |
| 237748_at   | -0.12371292 | -3.20312688 | 0.002199776 | 0.009877152 |
| 237749_at   | -0.02460193 | -0.59530601 | 0.553932366 | 0.716372179 |
| 237750_at   | 0.040013966 | 1.256339093 | 0.213981365 | 0.379528394 |
| 237751_x_at | 0.030528474 | 1.186271124 | 0.240305449 | 0.410257894 |
| 237752_at   | 0.017581864 | 0.594310258 | 0.554593571 | 0.716935551 |
| 237753_at   | 0.097490368 | 3.039990772 | 0.003533952 | 0.014751042 |
| 237754_at   | 0.023587624 | 0.622126718 | 0.536273143 | 0.702542961 |
| 237755_s_at | 0.072068999 | 1.423911851 | 0.159778243 | 0.308085652 |
| 237756_at   | -0.00191128 | -0.07095769 | 0.943673181 | 0.970855038 |
| 237757_at   | -0.0615538  | -2.21000121 | 0.031026409 | 0.087457098 |
| 237758_at   | -0.05082641 | -1.07343196 | 0.287480355 | 0.465631238 |
| 237759_at   | -0.05008195 | -1.16287697 | 0.249595847 | 0.422039937 |
| 237760_at   | -0.04204843 | -1.33022404 | 0.188601402 | 0.346843669 |
| 237761_at   | -0.00200578 | -0.04525009 | 0.964061907 | 0.981521625 |
| 237762_at   | -0.01533376 | -0.49605667 | 0.621710998 | 0.767626418 |
| 237763_at   | -0.01666695 | -0.42276795 | 0.674012835 | 0.804008478 |
| 237764_at   | 0.116487579 | 3.810225047 | 0.00033543  | 0.002044605 |
| 237765_at   | 0.019159456 | 0.56078735  | 0.577081767 | 0.734240686 |
| 237766_at   | -0.00109202 | -0.02885199 | 0.977080726 | 0.988515944 |
| 237767_at   | 0.019733979 | 0.62419422  | 0.534924022 | 0.701429781 |
| 237768_x_at | 0.420099303 | 6.912039294 | 3.94E-09    | 2.33E-07    |
| 237769_at   | -0.04564336 | -1.55226427 | 0.125986577 | 0.259238397 |
| 237770_at   | 0.039627839 | 1.403697347 | 0.165689347 | 0.316533654 |
| 237771_s_at | -0.01941665 | -0.62158412 | 0.536627497 | 0.702879637 |
| 237772_at   | 0.020869558 | 0.555924627 | 0.580380097 | 0.736843001 |
| 237773_at   | -0.19377754 | -4.75039249 | 1.36E-05    | 0.00013746  |
| 237774_at   | -0.07860795 | -1.59793766 | 0.115438723 | 0.242568405 |
| 237775_x_at | -0.01132503 | -0.34055523 | 0.734657024 | 0.845499748 |
| 237776_at   | -0.08881469 | -1.76909824 | 0.082084151 | 0.18722593  |
| 237777_at   | 0.042432406 | 1.569567564 | 0.121903281 | 0.252519185 |
| 237778_at   | -0.16732091 | -4.80143321 | 1.13E-05    | 0.000118081 |
| 237779_at   | -0.04523564 | -1.4537094  | 0.151364859 | 0.296213631 |
| 237780_at   | -0.02511918 | -0.74242527 | 0.460797113 | 0.639166498 |
| 237781_at   | -0.02299229 | -0.65790027 | 0.513179959 | 0.683831919 |
| 237782_at   | 0.056468727 | 1.251076385 | 0.215881289 | 0.381878748 |
| 237783_at   | -0.02344299 | -0.77007228 | 0.444352186 | 0.624535753 |
| 237784_at   | 0.028295716 | 0.805765386 | 0.423637721 | 0.605204482 |
| 237785_at   | 0.106673817 | 3.663342572 | 0.000537079 | 0.003042222 |
| 237786_at   | -0.00378401 | -0.08894136 | 0.929431961 | 0.963249329 |
| 237787_at   | -0.05901585 | -2.03437181 | 0.046450533 | 0.120436689 |
| 237788_at   | -0.02411068 | -0.96583643 | 0.338097471 | 0.520899483 |
| 237789_at   | 0.034482173 | 0.988003387 | 0.327215356 | 0.5094906   |
| 237790_at   | -0.54358218 | -8.11701884 | 3.65E-11    | 1.22E-08    |
| 237791_at   | 0.01105235  | 0.342203453 | 0.733422809 | 0.844644837 |
| 237792_at   | -0.02701982 | -0.85493708 | 0.396069887 | 0.57871499  |
| 237793_at   | 0.006333869 | 0.153322665 | 0.878670889 | 0.935011772 |
| 237794_at   | -0.25180969 | -6.11452374 | 8.54E-08    | 2.23E-06    |
| 237795_s_at | 0.03037825  | 0.913291886 | 0.364833561 | 0.548182542 |

|             |             |             |             |             |
|-------------|-------------|-------------|-------------|-------------|
| 237796_at   | -0.03264054 | -0.93978562 | 0.351187545 | 0.534398153 |
| 237797_at   | 0.00237104  | 0.094361417 | 0.925144162 | 0.960787817 |
| 237798_at   | -0.04105062 | -2.12245513 | 0.03803843  | 0.102750894 |
| 237799_at   | -0.06222982 | -1.19441072 | 0.237132355 | 0.406502214 |
| 237800_at   | 0.069294393 | 2.264071348 | 0.027287939 | 0.078899694 |
| 237801_at   | -0.01860427 | -0.64091956 | 0.524075052 | 0.692650073 |
| 237802_at   | -0.55129056 | -6.69757642 | 9.05E-09    | 4.16E-07    |
| 237803_x_at | 0.100483449 | 2.340794534 | 0.022668192 | 0.068138744 |
| 237804_at   | -0.02555682 | -0.99387522 | 0.324372291 | 0.506510829 |
| 237805_at   | -0.02643682 | -0.54896749 | 0.585114738 | 0.740519012 |
| 237806_s_at | -0.05948258 | -1.55720632 | 0.124809335 | 0.257212529 |
| 237807_at   | 0.072472636 | 1.678977558 | 0.098484665 | 0.215031348 |
| 237808_at   | -0.02530425 | -0.83479506 | 0.407225528 | 0.589579296 |
| 237809_at   | -0.07848091 | -2.12540126 | 0.037781656 | 0.102248865 |
| 237810_at   | 0.001267438 | 0.043443394 | 0.965495867 | 0.982437489 |
| 237811_at   | 0.002725324 | 0.077077999 | 0.938824215 | 0.968083223 |
| 237812_at   | -0.05073497 | -1.34500615 | 0.18380865  | 0.340987719 |
| 237813_at   | 0.021724811 | 0.606479763 | 0.54653999  | 0.710463632 |
| 237814_at   | -0.03159583 | -1.12381914 | 0.265675156 | 0.440871605 |
| 237815_at   | 0.048671356 | 1.503066006 | 0.138195463 | 0.277359064 |
| 237816_at   | 0.025061832 | 0.677516973 | 0.500745791 | 0.673284603 |
| 237817_at   | -0.0673929  | -2.72078409 | 0.00856102  | 0.030756357 |
| 237818_at   | -0.01359978 | -0.43184642 | 0.667438766 | 0.799734016 |
| 237819_at   | -0.05628841 | -1.7008071  | 0.094283811 | 0.208219206 |
| 237820_at   | -0.07035583 | -2.05001448 | 0.044848614 | 0.117180607 |
| 237821_at   | 0.01040834  | 0.417849    | 0.67758557  | 0.806591048 |
| 237822_at   | 0.023965798 | 0.97291413  | 0.334597287 | 0.517355608 |
| 237823_at   | 0.068799527 | 1.893642096 | 0.063215437 | 0.153225531 |
| 237824_at   | 0.013873975 | 0.34931163  | 0.728108243 | 0.841299248 |
| 237825_x_at | 0.023900603 | 1.036135314 | 0.304398324 | 0.484340997 |
| 237826_at   | -0.02630559 | -0.89906691 | 0.372298726 | 0.555496916 |
| 237827_at   | -0.06511829 | -1.90316048 | 0.0619383   | 0.150811576 |
| 237828_at   | -0.05508372 | -1.60473612 | 0.11393138  | 0.240089646 |
| 237829_at   | -0.00178141 | -0.05687173 | 0.954840959 | 0.976761934 |
| 237830_at   | 0.047156705 | 2.194243344 | 0.032197615 | 0.090161391 |
| 237831_x_at | -0.00796693 | -0.34544539 | 0.730997272 | 0.843111566 |
| 237832_at   | -0.55578788 | -6.01289638 | 1.26E-07    | 3.03E-06    |
| 237833_s_at | -0.15074108 | -4.14028651 | 0.000112731 | 0.000814711 |
| 237834_at   | 0.017071729 | 0.580675636 | 0.563686909 | 0.724302646 |
| 237835_at   | 0.00472363  | 0.177906376 | 0.859410427 | 0.923443147 |
| 237836_at   | 0.013240806 | 0.372475879 | 0.710883099 | 0.830218132 |
| 237837_at   | -0.02634375 | -0.89878735 | 0.372446406 | 0.5555561   |
| 237838_at   | -0.08346151 | -2.35957572 | 0.021649332 | 0.065663517 |
| 237839_at   | 0.182787391 | 2.320308971 | 0.023828049 | 0.071009081 |
| 237840_at   | -0.0821039  | -2.18055983 | 0.033245986 | 0.092448334 |
| 237841_at   | -0.02440048 | -0.97784477 | 0.33217311  | 0.514699602 |
| 237842_at   | -0.06552462 | -2.21854791 | 0.030406996 | 0.0859953   |
| 237843_at   | 0.008579928 | 0.288224348 | 0.774192603 | 0.870786139 |
| 237844_at   | -0.01353517 | -0.40244483 | 0.688821835 | 0.814641259 |
| 237845_at   | -0.01015841 | -0.26425213 | 0.792513337 | 0.881842684 |
| 237846_at   | -0.03124213 | -1.15348453 | 0.253397355 | 0.426338689 |
| 237847_at   | -0.02761    | -0.73108235 | 0.467643806 | 0.644801067 |
| 237848_at   | 0.014664784 | 0.528428859 | 0.599198528 | 0.751006243 |
| 237849_at   | -0.18391136 | -2.38661926 | 0.020254053 | 0.062225485 |
| 237850_at   | -0.00823248 | -0.34569003 | 0.730814349 | 0.842987609 |
| 237851_at   | 0.050034961 | 1.292425695 | 0.201285826 | 0.363439969 |
| 237852_at   | -0.00085717 | -0.02485087 | 0.9802584   | 0.990094657 |
| 237853_x_at | 0.106315238 | 2.073904306 | 0.042494402 | 0.11219707  |
| 237854_at   | 0.094290535 | 2.719141369 | 0.008598775 | 0.030872144 |
| 237855_at   | 0.014342211 | 0.341149739 | 0.734211763 | 0.845222305 |
| 237856_at   | -0.058451   | -1.74386581 | 0.086429468 | 0.19492478  |
| 237857_at   | 0.03239784  | 1.130468037 | 0.262887428 | 0.437528951 |
| 237858_s_at | -0.0374149  | -1.19573831 | 0.236617708 | 0.405900226 |
| 237859_at   | 0.141587429 | 3.819024334 | 0.000326007 | 0.001995328 |
| 237860_at   | -0.12954477 | -3.51441845 | 0.000857096 | 0.004481205 |
| 237861_at   | 0.001989079 | 0.061263976 | 0.951357572 | 0.975105834 |
| 237862_at   | -0.01773911 | -0.49836766 | 0.620091432 | 0.766890478 |
| 237863_at   | -0.01712953 | -0.65034445 | 0.518012908 | 0.687586364 |
| 237864_at   | 0.127814906 | 3.273531229 | 0.001785026 | 0.008292343 |
| 237865_x_at | 0.018509163 | 0.608969557 | 0.544899636 | 0.709183567 |
| 237866_at   | -0.00772476 | -0.26913479 | 0.788771853 | 0.879491833 |
| 237867_s_at | -0.04387911 | -1.48810874 | 0.142087164 | 0.28300916  |
| 237868_x_at | 0.271636747 | 5.598907404 | 6.03E-07    | 1.05E-05    |
| 237869_at   | -0.0375283  | -1.16957523 | 0.24690987  | 0.418606878 |
| 237870_at   | -0.01229886 | -0.31818227 | 0.751478515 | 0.857007046 |



|             |             |             |             |             |
|-------------|-------------|-------------|-------------|-------------|
| 237871_x_at | 0.037158085 | 0.967003502 | 0.337518656 | 0.520294694 |
| 237872_at   | 0.05697431  | 1.576551428 | 0.120285557 | 0.249955926 |
| 237873_s_at | -0.10687751 | -3.93438211 | 0.000223711 | 0.001451311 |
| 237874_at   | 0.003491094 | 0.176453415 | 0.860546506 | 0.924023481 |
| 237875_at   | 0.003556877 | 0.118822256 | 0.905822802 | 0.950120462 |
| 237876_at   | -0.03736501 | -1.75018237 | 0.085324181 | 0.193000724 |
| 237877_at   | -0.00051937 | -0.01994317 | 0.9841565   | 0.992282685 |
| 237878_at   | 0.10036844  | 2.533307203 | 0.013997525 | 0.045880264 |
| 237879_at   | -0.04321476 | -1.13304449 | 0.26181277  | 0.436276522 |
| 237880_at   | 0.022892686 | 0.792035123 | 0.43153664  | 0.612378089 |
| 237881_at   | 0.136877238 | 2.8252975   | 0.006449311 | 0.024321376 |
| 237882_at   | 0.048576576 | 1.521091275 | 0.133618007 | 0.270579169 |
| 237883_at   | -0.01575176 | -0.43422198 | 0.665722814 | 0.798617206 |
| 237884_x_at | 0.038682485 | 1.838943144 | 0.070994915 | 0.16745328  |
| 237885_at   | 0.090981365 | 1.487186868 | 0.142329819 | 0.283340948 |
| 237886_at   | -0.01087471 | -0.32227263 | 0.748393764 | 0.854930684 |
| 237887_at   | 0.005263041 | 0.16747654  | 0.86757206  | 0.928285546 |
| 237888_at   | -0.03076157 | -1.05242837 | 0.296925984 | 0.475907907 |
| 237889_s_at | -0.05555524 | -1.25912889 | 0.212979235 | 0.378272383 |
| 237890_at   | 0.042682242 | 1.191630953 | 0.23821257  | 0.407728398 |
| 237891_at   | -0.04250677 | -1.58834773 | 0.117592287 | 0.245948825 |
| 237892_at   | 0.002711975 | 0.068137875 | 0.945907979 | 0.972096197 |
| 237893_at   | -0.02321177 | -0.64949305 | 0.518558997 | 0.688025137 |
| 237894_at   | 0.000299464 | 0.008837056 | 0.992979175 | 0.996949842 |
| 237895_at   | 0.153870994 | 4.792141262 | 1.17E-05    | 0.000121335 |
| 237896_at   | -0.05022572 | -1.2409627  | 0.219567427 | 0.386456657 |
| 237897_at   | -0.09432391 | -2.34915833 | 0.022209299 | 0.067037388 |
| 237898_at   | -0.06630299 | -2.1111265  | 0.039040029 | 0.104799945 |
| 237899_at   | -0.04404616 | -1.1349777  | 0.261008461 | 0.435313094 |
| 237900_at   | -0.01799744 | -0.4111314  | 0.682476735 | 0.810169205 |
| 237901_at   | 0.025052402 | 0.859483361 | 0.393578361 | 0.57634441  |
| 237902_at   | -0.00264038 | -0.10567612 | 0.916200446 | 0.955496111 |
| 237903_at   | 0.036060236 | 0.870375814 | 0.387648623 | 0.570288431 |
| 237904_at   | 0.066092384 | 1.070472176 | 0.288798682 | 0.467018515 |
| 237905_at   | -0.04249232 | -1.05618298 | 0.295222031 | 0.474077935 |
| 237906_at   | 0.010335327 | 0.316541799 | 0.752716825 | 0.857692631 |
| 237907_at   | 0.011871382 | 0.383202441 | 0.702957107 | 0.824683521 |
| 237908_at   | -0.06416254 | -2.0293588  | 0.046974246 | 0.121466717 |
| 237909_at   | 0.00161191  | 0.038008873 | 0.969809872 | 0.984801785 |
| 237910_x_at | -0.02325796 | -1.1092491  | 0.271856872 | 0.447771332 |
| 237911_at   | -0.06605546 | -1.84137163 | 0.070633181 | 0.166723256 |
| 237912_at   | 0.013744135 | 0.320349334 | 0.749843711 | 0.855859003 |
| 237913_at   | -0.12594068 | -2.80239166 | 0.006866126 | 0.02563155  |
| 237914_s_at | -0.02042024 | -0.74715095 | 0.457961695 | 0.636649418 |
| 237915_at   | 0.015877525 | 0.499449954 | 0.619333593 | 0.766271857 |
| 237916_at   | 0.040729582 | 1.226185992 | 0.225036097 | 0.392281505 |
| 237917_at   | -0.03375783 | -1.36741477 | 0.176720423 | 0.331569653 |
| 237918_at   | 0.008185463 | 0.297087869 | 0.767450593 | 0.866746738 |
| 237919_at   | -0.0103486  | -0.32790719 | 0.744151228 | 0.851798142 |
| 237920_at   | -0.05262784 | -2.08202692 | 0.041718755 | 0.11054655  |
| 237921_at   | -0.00228585 | -0.0856342  | 0.932049293 | 0.964708469 |
| 237922_at   | -0.0046526  | -0.16362004 | 0.8705936   | 0.930159402 |
| 237923_at   | -0.00220403 | -0.12977137 | 0.897191998 | 0.944848596 |
| 237924_at   | -0.0406267  | -1.14953227 | 0.255009304 | 0.428261213 |
| 237925_at   | -0.0652569  | -1.23812715 | 0.22060917  | 0.387548625 |
| 237926_s_at | 0.027930532 | 0.65168057  | 0.517156526 | 0.686796406 |
| 237927_at   | -0.03995472 | -1.30096042 | 0.198367329 | 0.359559413 |
| 237928_at   | -0.02368905 | -0.54001092 | 0.591237052 | 0.745165435 |
| 237929_at   | -0.08418331 | -1.88974605 | 0.063744595 | 0.154251633 |
| 237930_at   | -0.0086452  | -0.35823021 | 0.721459046 | 0.837187716 |
| 237931_at   | 0.014673417 | 0.310307361 | 0.757428828 | 0.860560534 |
| 237932_at   | -0.04048173 | -1.30705463 | 0.196302883 | 0.357053782 |
| 237933_at   | -0.43617172 | -6.55708296 | 1.56E-08    | 6.19E-07    |
| 237934_at   | -0.05119108 | -1.48496249 | 0.142916669 | 0.284192737 |
| 237935_at   | -0.0389341  | -1.235681   | 0.22151077  | 0.388530586 |
| 237936_at   | 0.069735975 | 2.0824612   | 0.041677633 | 0.110451659 |
| 237937_x_at | -0.02706572 | -1.31116738 | 0.194918822 | 0.355099951 |
| 237938_at   | -0.03699676 | -1.41107244 | 0.163513466 | 0.313314347 |
| 237939_at   | -0.04043243 | -0.79694453 | 0.428702287 | 0.60981659  |
| 237940_s_at | 0.065605805 | 2.235791555 | 0.029190364 | 0.083296711 |
| 237941_at   | 0.03632129  | 1.072488215 | 0.287900257 | 0.466071587 |
| 237942_at   | -0.05392174 | -1.51526016 | 0.135085449 | 0.272795575 |
| 237943_at   | 0.114704164 | 2.21164009  | 0.03090678  | 0.087158367 |
| 237944_at   | 0.061293084 | 1.986851919 | 0.051623302 | 0.130753676 |
| 237945_at   | -0.47770464 | -4.68021253 | 1.74E-05    | 0.000169614 |

|             |              |             |             |             |
|-------------|--------------|-------------|-------------|-------------|
| 237946_at   | 0.015429169  | 0.368592177 | 0.713760797 | 0.831970099 |
| 237947_at   | 0.005719257  | 0.205653982 | 0.837774386 | 0.910461358 |
| 237948_at   | -0.03059668  | -1.07387329 | 0.287284137 | 0.465478833 |
| 237949_at   | -0.00089643  | -0.02554879 | 0.979704086 | 0.989847968 |
| 237950_s_at | -0.04104589  | -1.11313932 | 0.270196544 | 0.445841756 |
| 237951_at   | 0.200507583  | 3.921813889 | 0.000233142 | 0.001503979 |
| 237952_at   | 0.034769073  | 1.092863686 | 0.278928679 | 0.45583812  |
| 237953_at   | -0.02515222  | -0.63212726 | 0.529763765 | 0.697159955 |
| 237954_x_at | -0.12107251  | -3.83488299 | 0.000309661 | 0.001911779 |
| 237955_at   | 0.044682442  | 1.092690719 | 0.279004009 | 0.455897304 |
| 237956_s_at | -0.0632985   | -1.76428311 | 0.082899051 | 0.188641772 |
| 237957_at   | -0.01273503  | -0.3914278  | 0.696901592 | 0.820601395 |
| 237958_at   | -0.09022383  | -2.54876305 | 0.01345247  | 0.044442032 |
| 237959_at   | 0.026910096  | 0.787961574 | 0.433896865 | 0.61462272  |
| 237960_at   | -0.00957802  | -0.2982909  | 0.766536892 | 0.866021204 |
| 237961_at   | -0.03967699  | -1.4133764  | 0.162838275 | 0.312287563 |
| 237962_x_at | -0.02975039  | -1.34104259 | 0.18508457  | 0.342574323 |
| 237963_x_at | -0.00505111  | -0.14192475 | 0.887626544 | 0.939597478 |
| 237964_at   | -0.01650408  | -0.46188026 | 0.645878341 | 0.785154933 |
| 237965_at   | -0.02167199  | -0.48905801 | 0.626627194 | 0.771408731 |
| 237966_at   | 0.014361155  | 0.496940568 | 0.62109133  | 0.767280677 |
| 237967_at   | -0.04322501  | -1.47612513 | 0.145267026 | 0.287485008 |
| 237968_at   | -0.1572098   | -4.46911144 | 3.65E-05    | 0.000317158 |
| 237969_at   | -0.05841061  | -1.33973445 | 0.185507149 | 0.343185922 |
| 237970_at   | -0.05959588  | -1.8091725  | 0.075557375 | 0.175628554 |
| 237971_at   | 0.031751221  | 0.81210122  | 0.420022209 | 0.602214641 |
| 237972_at   | -0.0082321   | -0.29396198 | 0.769826263 | 0.868180703 |
| 237973_at   | -0.16866607  | -4.01449335 | 0.000171686 | 0.001158535 |
| 237974_at   | -0.39905022  | -4.99220654 | 5.68E-06    | 6.68E-05    |
| 237975_at   | 0.015914105  | 0.469678191 | 0.640329035 | 0.781367515 |
| 237976_at   | 0.019330532  | 0.680479644 | 0.498882221 | 0.671848347 |
| 237977_at   | -0.00458362  | -0.16755344 | 0.867511831 | 0.928285546 |
| 237978_at   | -0.02843383  | -1.16653088 | 0.24812806  | 0.42032139  |
| 237979_at   | -0.04469837  | -1.69202795 | 0.09595521  | 0.210940987 |
| 237980_at   | -0.04309228  | -1.45050495 | 0.152252688 | 0.297320507 |
| 237981_at   | 0.001445242  | 0.05280044  | 0.9580706   | 0.978609756 |
| 237982_at   | -0.01160333  | -0.40562666 | 0.686495034 | 0.81278044  |
| 237983_at   | -0.11763389  | -3.59371853 | 0.000669099 | 0.003656118 |
| 237984_x_at | -0.02270461  | -1.06259065 | 0.292329581 | 0.470803374 |
| 237985_at   | -0.02454996  | -0.49608671 | 0.621689932 | 0.767626418 |
| 237986_at   | 0.04903693   | 0.972489727 | 0.334806492 | 0.517595619 |
| 237987_x_at | -0.02681418  | -0.88483995 | 0.37986135  | 0.562554685 |
| 237988_at   | -0.10603484  | -3.3588813  | 0.001380946 | 0.006680801 |
| 237989_at   | -0.05480165  | -2.03045296 | 0.046859505 | 0.121243849 |
| 237990_x_at | -0.04880637  | -1.8226978  | 0.073455003 | 0.17185902  |
| 237991_at   | -0.02468436  | -0.76764831 | 0.445780129 | 0.62587156  |
| 237992_at   | -0.08393274  | -2.2860705  | 0.02588476  | 0.075794505 |
| 237993_at   | 0.008542275  | 0.179811898 | 0.85792094  | 0.922484052 |
| 237994_at   | -0.004938513 | -1.3017336  | 0.198104513 | 0.359228881 |
| 237995_at   | -0.15670394  | -3.25492463 | 0.001886826 | 0.008686239 |
| 237996_at   | 0.080308629  | 3.013044609 | 0.003816507 | 0.015762573 |
| 237997_s_at | -0.0181029   | -0.72785258 | 0.469603851 | 0.646322721 |
| 237998_at   | -0.01638561  | -0.40910449 | 0.68395525  | 0.81101737  |
| 237999_at   | 0.024272026  | 0.8929424   | 0.375542527 | 0.558471588 |
| 238000_at   | 0.00678769   | 0.189725604 | 0.850180192 | 0.917783892 |
| 238001_at   | 0.021429782  | 0.599512214 | 0.551143724 | 0.713859305 |
| 238002_at   | 0.769970849  | 6.389615857 | 2.97E-08    | 9.88E-07    |
| 238003_at   | 0.695295791  | 8.083631234 | 4.15E-11    | 1.31E-08    |
| 238004_at   | 0.078600426  | 1.997690905 | 0.050401776 | 0.128278681 |
| 238005_s_at | -0.00470919  | -0.08151137 | 0.935313214 | 0.966385809 |
| 238006_at   | 0.020657935  | 0.531014651 | 0.597416745 | 0.749761286 |
| 238007_at   | -0.03383189  | -0.57273995 | 0.569013177 | 0.728016286 |
| 238008_at   | 0.414472444  | 3.736935294 | 0.000424737 | 0.002493739 |
| 238009_at   | 0.297747278  | 4.634275159 | 2.05E-05    | 0.00019505  |
| 238010_at   | -0.01949369  | -0.59275092 | 0.555629801 | 0.717942844 |
| 238011_at   | -0.15318981  | -3.7870189  | 0.000361552 | 0.002174179 |
| 238012_at   | -0.04964565  | -1.33508791 | 0.187014078 | 0.344974128 |
| 238013_at   | -0.16288703  | -3.12823602 | 0.002739429 | 0.011900328 |
| 238014_at   | 0.030595487  | 0.963068655 | 0.339472776 | 0.522334136 |
| 238015_at   | 0.004760722  | 0.167503857 | 0.867550665 | 0.928285546 |
| 238016_s_at | 0.03334433   | 0.697463068 | 0.488272702 | 0.662694998 |
| 238017_at   | -0.19090323  | -5.76178801 | 3.27E-07    | 6.42E-06    |
| 238018_at   | -0.25244944  | -2.74316725 | 0.008061504 | 0.029277469 |
| 238019_at   | 0.031141143  | 0.7481187   | 0.457382286 | 0.63612775  |
| 238020_at   | -0.14663515  | -2.01776939 | 0.048204543 | 0.123905517 |

|             |             |             |             |             |
|-------------|-------------|-------------|-------------|-------------|
| 238021_s_at | 0.233248954 | 1.609489857 | 0.112886863 | 0.23843942  |
| 238022_at   | 0.164931629 | 1.54424152  | 0.127916544 | 0.261988276 |
| 238023_at   | 0.018148216 | 0.587883338 | 0.558870699 | 0.720602714 |
| 238024_at   | -0.03991877 | -1.00746495 | 0.317855773 | 0.499125477 |
| 238025_at   | -0.01162126 | -0.20188788 | 0.840704002 | 0.912402702 |
| 238026_at   | -0.16676793 | -3.85036388 | 0.000294466 | 0.00183316  |
| 238027_at   | 0.04954725  | 1.471897109 | 0.146402186 | 0.289065893 |
| 238028_at   | 0.006140165 | 0.176448812 | 0.860550106 | 0.924023481 |
| 238029_s_at | -0.40714662 | -4.23218453 | 8.26E-05    | 0.00062757  |
| 238030_at   | 0.055100195 | 1.37585027  | 0.17410693  | 0.328084788 |
| 238031_at   | 0.081258685 | 2.095555306 | 0.040454176 | 0.107842411 |
| 238032_at   | 0.202681025 | 4.965958736 | 6.25E-06    | 7.23E-05    |
| 238033_at   | -0.03482702 | -1.18826274 | 0.239526228 | 0.409412405 |
| 238034_at   | -0.28587241 | -4.73126407 | 1.45E-05    | 0.000145603 |
| 238035_at   | -0.03952187 | -1.40973477 | 0.163906473 | 0.313981269 |
| 238036_at   | -0.00501931 | -0.12880267 | 0.897955103 | 0.94538067  |
| 238037_at   | -0.0230512  | -0.58936383 | 0.557883971 | 0.719711066 |
| 238038_at   | 0.035803902 | 0.968122772 | 0.336964162 | 0.519726751 |
| 238039_at   | -0.00169352 | -0.03817205 | 0.969680324 | 0.984774082 |
| 238040_at   | 0.199061821 | 3.447201603 | 0.00105481  | 0.005327935 |
| 238041_at   | 0.176268502 | 3.36742427  | 0.00134565  | 0.006538916 |
| 238042_at   | 0.002729001 | 0.062143601 | 0.950660074 | 0.974693738 |
| 238043_at   | -0.14965777 | -2.23944927 | 0.028937885 | 0.082760092 |
| 238044_at   | 0.142499595 | 2.543021973 | 0.013652645 | 0.044964186 |
| 238045_at   | -0.01372187 | -0.48770377 | 0.627580453 | 0.772160878 |
| 238046_x_at | -0.02428669 | -0.58437084 | 0.5612152   | 0.722658914 |
| 238047_at   | -0.05410223 | -0.37975698 | 0.705499444 | 0.826392544 |
| 238048_at   | -0.00440647 | -0.10990475 | 0.912860653 | 0.953812433 |
| 238049_at   | 0.834012414 | 7.771194897 | 1.40E-10    | 2.61E-08    |
| 238050_at   | 0.013667039 | 0.45492956  | 0.650841841 | 0.788405257 |
| 238051_x_at | -0.00583794 | -0.09391133 | 0.925500139 | 0.960911888 |
| 238052_at   | -0.0036779  | -0.10805971 | 0.914317684 | 0.954267438 |
| 238053_at   | 0.100970723 | 2.783004526 | 0.007238159 | 0.026772144 |
| 238054_at   | -0.00994108 | -0.30876677 | 0.75859464  | 0.86112413  |
| 238055_at   | 0.098457797 | 2.705261454 | 0.00892393  | 0.031807023 |
| 238056_at   | -0.05668699 | -1.64036801 | 0.106289289 | 0.22788361  |
| 238057_at   | -0.01696031 | -0.57046247 | 0.570546321 | 0.72903866  |
| 238058_at   | 0.127934333 | 1.992141754 | 0.051024012 | 0.12951469  |
| 238059_at   | -0.11162933 | -2.00877758 | 0.049178121 | 0.12582977  |
| 238060_s_at | 0.010845064 | 0.230894887 | 0.818201178 | 0.898563633 |
| 238061_at   | -0.10092957 | -1.31970732 | 0.192068348 | 0.351526214 |
| 238062_at   | 0.253076081 | 3.877015193 | 0.000269968 | 0.001699117 |
| 238063_at   | 0.032634644 | 1.500406967 | 0.138881088 | 0.278347621 |
| 238064_at   | 0.076607443 | 2.873780393 | 0.005642988 | 0.021767343 |
| 238065_at   | -0.0516824  | -1.43376566 | 0.156956743 | 0.303982959 |
| 238066_at   | 0.189593394 | 2.142370533 | 0.036331918 | 0.099172178 |
| 238067_at   | -0.05214029 | -1.08861945 | 0.280781204 | 0.457913939 |
| 238068_at   | 0.031730149 | 0.810941518 | 0.420682593 | 0.602639479 |
| 238069_at   | 0.129063056 | 2.225538629 | 0.029908478 | 0.084938025 |
| 238070_at   | 0.049041352 | 1.275972579 | 0.207002518 | 0.370706705 |
| 238071_at   | -0.01355645 | -0.34554665 | 0.73092155  | 0.843086097 |
| 238072_at   | -0.05718439 | -1.2653268  | 0.210765311 | 0.375534157 |
| 238073_at   | 0.016111462 | 0.198576131 | 0.843282056 | 0.913878652 |
| 238074_at   | -0.01588805 | -0.3652073  | 0.716272292 | 0.833788484 |
| 238075_at   | -0.09263797 | -3.03773975 | 0.003556788 | 0.014833889 |
| 238076_at   | 0.002783159 | 0.064305951 | 0.948945606 | 0.973807192 |
| 238077_at   | 0.197801211 | 3.344786134 | 0.001441102 | 0.006932891 |
| 238078_at   | -0.00542547 | -0.19331715 | 0.847379473 | 0.916134537 |
| 238079_at   | -0.00501607 | -0.14931428 | 0.881818635 | 0.936777714 |
| 238080_at   | -0.1374256  | -2.84827371 | 0.006054781 | 0.023076945 |
| 238081_at   | 0.278297472 | 3.508262995 | 0.000873622 | 0.004552695 |
| 238082_at   | 0.072481829 | 2.631126642 | 0.010859282 | 0.037257269 |
| 238083_at   | 0.056879953 | 1.87068033  | 0.066388498 | 0.159192765 |
| 238084_at   | 0.064564135 | 1.92031328  | 0.059692084 | 0.146427279 |
| 238085_at   | 0.141544302 | 3.010604672 | 0.003843106 | 0.015857822 |
| 238086_at   | -0.0226225  | -0.8307602  | 0.409483127 | 0.591621244 |
| 238087_at   | -0.16834718 | -5.23391433 | 2.35E-06    | 3.23E-05    |
| 238088_at   | -0.00536958 | -0.11364205 | 0.909910221 | 0.952470022 |
| 238089_at   | 0.065860969 | 1.58157024  | 0.119133693 | 0.24810814  |
| 238090_at   | -0.00447413 | -0.11190582 | 0.911280745 | 0.953011795 |
| 238091_at   | -0.04162125 | -0.87086738 | 0.387382343 | 0.569966147 |
| 238092_at   | 0.042649159 | 1.103237246 | 0.274436775 | 0.450741551 |
| 238093_at   | 0.022119894 | 0.690399383 | 0.492670157 | 0.666440737 |
| 238094_at   | -0.00826403 | -0.20123828 | 0.841209549 | 0.912720484 |
| 238095_at   | -0.03846706 | -1.26624329 | 0.21043939  | 0.375174175 |

|             |             |             |             |             |
|-------------|-------------|-------------|-------------|-------------|
| 238096_at   | 0.028941506 | 1.095341665 | 0.277851041 | 0.454479553 |
| 238097_at   | 0.03375531  | 1.044703855 | 0.300452786 | 0.479839762 |
| 238098_at   | 0.095315078 | 2.576859117 | 0.012510687 | 0.041866539 |
| 238099_at   | 0.082423298 | 2.579980981 | 0.012409825 | 0.041591295 |
| 238100_at   | -0.37361138 | -5.80995803 | 2.72E-07    | 5.51E-06    |
| 238101_at   | 0.032747546 | 0.909879023 | 0.366615806 | 0.549778081 |
| 238102_s_at | 0.06528088  | 2.274540466 | 0.026611997 | 0.077411051 |
| 238103_at   | -0.03006922 | -0.72867909 | 0.469101827 | 0.645894786 |
| 238104_at   | 0.104775437 | 2.948164181 | 0.004585452 | 0.018370275 |
| 238105_x_at | -0.02334668 | -0.86040862 | 0.39307248  | 0.575841455 |
| 238106_at   | 0.088953992 | 1.899063784 | 0.062485268 | 0.151853812 |
| 238107_at   | 0.067661691 | 2.178011399 | 0.033444513 | 0.092844411 |
| 238108_at   | 0.09975103  | 2.471025899 | 0.016402198 | 0.05234181  |
| 238109_at   | -0.09066017 | -2.48276204 | 0.015922413 | 0.051117339 |
| 238110_at   | -0.05414141 | -1.62576704 | 0.109368866 | 0.232935253 |
| 238111_at   | -0.02652549 | -0.82600199 | 0.412155254 | 0.59446339  |
| 238112_at   | 0.044982322 | 1.269614382 | 0.209243787 | 0.373643196 |
| 238113_at   | 0.04753213  | 1.618585605 | 0.11090988  | 0.23536488  |
| 238114_at   | -0.05755168 | -1.92805738 | 0.0587009   | 0.144415977 |
| 238115_at   | -0.12667146 | -3.67825481 | 0.000512236 | 0.002924859 |
| 238116_at   | 0.618091174 | 3.066938707 | 0.003270999 | 0.013816035 |
| 238117_at   | 0.163230252 | 3.20339236  | 0.002198054 | 0.009872093 |
| 238118_s_at | 0.058131369 | 1.380279416 | 0.172746596 | 0.326209103 |
| 238119_at   | 0.097677385 | 2.717705582 | 0.008631899 | 0.030976139 |
| 238120_at   | 0.009957403 | 0.279520445 | 0.780830248 | 0.874741498 |
| 238121_at   | 0.042298362 | 0.949776549 | 0.346128811 | 0.529241125 |
| 238122_at   | -0.02598851 | -0.70042948 | 0.486432472 | 0.661000336 |
| 238123_at   | -0.12080298 | -2.23484955 | 0.029255701 | 0.083455348 |
| 238124_at   | 0.066444596 | 1.930981981 | 0.058330238 | 0.14374938  |
| 238125_at   | 0.050713834 | 1.158152511 | 0.251502892 | 0.424445558 |
| 238126_at   | 0.001262607 | 0.042671057 | 0.966108899 | 0.982732587 |
| 238127_at   | 0.088489066 | 2.387111307 | 0.020229429 | 0.062164611 |
| 238128_at   | -0.02117825 | -0.60390794 | 0.548237019 | 0.711558601 |
| 238129_s_at | -0.1972082  | -3.7853911  | 0.000363456 | 0.002182984 |
| 238130_at   | 0.021226482 | 0.643281475 | 0.522552359 | 0.691394103 |
| 238131_at   | -0.02650651 | -0.8393745  | 0.404672464 | 0.587047077 |
| 238132_at   | 0.004179307 | 0.099380791 | 0.921175327 | 0.95860404  |
| 238133_at   | -0.13020988 | -2.47966718 | 0.01604769  | 0.051430861 |
| 238134_at   | 0.052655036 | 1.85810494  | 0.068182611 | 0.162466264 |
| 238135_at   | 0.126181317 | 2.570288328 | 0.012725413 | 0.042461115 |
| 238136_at   | -0.24966654 | -4.71192092 | 1.55E-05    | 0.000154761 |
| 238137_at   | -0.02284645 | -0.9014468  | 0.371043055 | 0.554306749 |
| 238138_at   | 0.0119837   | 0.313886158 | 0.754722822 | 0.859014729 |
| 238139_at   | 0.004330738 | 0.116910623 | 0.907330877 | 0.950840673 |
| 238140_at   | 0.012947278 | 0.336874383 | 0.737415822 | 0.847486718 |
| 238141_s_at | 0.039669345 | 1.261264895 | 0.212214305 | 0.377303464 |
| 238142_at   | 0.146155377 | 3.516818138 | 0.000850735 | 0.004452111 |
| 238143_at   | -0.12346365 | -3.0428939  | 0.003504704 | 0.014653591 |
| 238144_s_at | 0.022319133 | 0.625945842 | 0.5337824   | 0.700489903 |
| 238145_at   | 0.013430859 | 0.274933327 | 0.784335048 | 0.876901552 |
| 238146_at   | 0.298801994 | 7.413388365 | 5.61E-10    | 6.29E-08    |
| 238147_at   | -0.19880264 | -4.75784833 | 1.32E-05    | 0.000134401 |
| 238148_s_at | 0.017253604 | 0.48972268  | 0.626159559 | 0.770981706 |
| 238149_at   | 0.013380985 | 0.267517846 | 0.790010338 | 0.880499315 |
| 238150_at   | 0.021257395 | 0.661737332 | 0.510734899 | 0.681549196 |
| 238151_at   | 0.071952682 | 2.125841648 | 0.037743403 | 0.10217207  |
| 238152_at   | -0.06025968 | -1.31982607 | 0.192028936 | 0.351482868 |
| 238153_at   | 0.052587419 | 1.462370596 | 0.148985418 | 0.292828592 |
| 238154_at   | 0.022131594 | 0.469696324 | 0.640316155 | 0.781367515 |
| 238155_at   | -0.05433672 | -1.30873052 | 0.195738009 | 0.356289779 |
| 238156_at   | 0.275350372 | 4.404315512 | 4.58E-05    | 0.000382158 |
| 238157_at   | -0.03191253 | -1.10176275 | 0.275072143 | 0.451423438 |
| 238158_at   | 0.025467156 | 0.663841228 | 0.509396908 | 0.680420642 |
| 238159_at   | 0.017752924 | 0.439545824 | 0.661883751 | 0.795773338 |
| 238160_at   | -0.00431167 | -0.22002731 | 0.826615039 | 0.903828334 |
| 238161_at   | 0.117083825 | 2.671726086 | 0.009756538 | 0.034209886 |
| 238162_at   | -0.03311025 | -1.11643818 | 0.268794203 | 0.444268735 |
| 238163_at   | 0.005163353 | 0.17006306  | 0.86554665  | 0.927345302 |
| 238164_at   | -0.09327488 | -2.6903631  | 0.009285445 | 0.032875381 |
| 238165_at   | -0.05987468 | -1.37213824 | 0.175253323 | 0.329605753 |
| 238166_s_at | 0.02326897  | 0.733736065 | 0.466036833 | 0.643578103 |
| 238167_at   | 0.091491323 | 1.723458818 | 0.090081657 | 0.201025087 |
| 238168_at   | -0.00567973 | -0.20791138 | 0.836019481 | 0.909505189 |
| 238169_at   | 0.045882913 | 2.124305964 | 0.037876941 | 0.102426106 |
| 238170_at   | 0.193729842 | 4.514271149 | 3.12E-05    | 0.000277115 |

|             |             |             |             |             |
|-------------|-------------|-------------|-------------|-------------|
| 238171_at   | -0.09588437 | -2.59711336 | 0.011869345 | 0.040104692 |
| 238172_at   | -0.00774232 | -0.15805154 | 0.87495988  | 0.932750685 |
| 238173_at   | 0.068331814 | 1.483316623 | 0.143352115 | 0.284741899 |
| 238174_at   | -0.03373417 | -0.80083028 | 0.42646681  | 0.607752462 |
| 238175_at   | -0.45822102 | -4.55993957 | 2.66E-05    | 0.000242902 |
| 238176_at   | 0.180497487 | 4.215905298 | 8.73E-05    | 0.000656791 |
| 238177_at   | -0.04379809 | -1.00342517 | 0.319783664 | 0.501395296 |
| 238178_at   | 0.456487739 | 3.464782416 | 0.00099928  | 0.005091759 |
| 238179_at   | 0.009677317 | 0.260874886 | 0.795104125 | 0.883532498 |
| 238180_at   | 0.061315895 | 1.613784817 | 0.111949821 | 0.236986615 |
| 238181_at   | 0.006263683 | 0.131460746 | 0.895861402 | 0.94414182  |
| 238182_at   | -0.0392154  | -0.87857418 | 0.383222565 | 0.565872944 |
| 238183_at   | -0.07135241 | -1.698709   | 0.094681062 | 0.208817905 |
| 238184_at   | -0.02235399 | -0.76097465 | 0.449725355 | 0.629172097 |
| 238185_at   | -0.11174426 | -3.05951527 | 0.00334155  | 0.01406905  |
| 238186_at   | 0.034090037 | 1.010461969 | 0.316430573 | 0.497621844 |
| 238187_at   | -0.05262845 | -1.38489147 | 0.171338763 | 0.324249323 |
| 238188_at   | 0.066230879 | 2.145772917 | 0.036047166 | 0.098533329 |
| 238189_at   | -0.034791   | -0.84677244 | 0.400568874 | 0.582897774 |
| 238190_at   | 0.017845808 | 0.477303802 | 0.634922234 | 0.777423137 |
| 238191_at   | -0.18339741 | -2.40537663 | 0.019334121 | 0.059976437 |
| 238192_at   | -0.00932978 | -0.28606645 | 0.77583667  | 0.871680136 |
| 238193_at   | 0.007543027 | 0.29139304  | 0.77178031  | 0.869271324 |
| 238194_at   | -0.03906684 | -0.89493726 | 0.374484006 | 0.557607767 |
| 238195_at   | -0.00105917 | -0.03096174 | 0.975405324 | 0.987536296 |
| 238196_at   | 0.019323725 | 0.387873564 | 0.699515819 | 0.822314719 |
| 238197_at   | -0.02775691 | -0.60176088 | 0.549655806 | 0.712690537 |
| 238198_at   | 0.040256104 | 1.11021039  | 0.271445932 | 0.447374768 |
| 238199_x_at | 0.129751252 | 2.526160564 | 0.01425625  | 0.046537164 |
| 238200_at   | -0.03828322 | -1.06046323 | 0.293287733 | 0.471819422 |
| 238201_at   | -0.03952102 | -1.42300896 | 0.160038728 | 0.30840164  |
| 238202_at   | -0.06447501 | -1.381574   | 0.17235053  | 0.325612524 |
| 238203_at   | 0.02017489  | 0.737594382 | 0.46370603  | 0.64152231  |
| 238204_at   | 0.050249119 | 1.441164235 | 0.154863848 | 0.301076086 |
| 238205_at   | -0.00371341 | -0.11953677 | 0.905259215 | 0.949828589 |
| 238206_at   | -0.18257845 | -4.85968181 | 9.17E-06    | 9.94E-05    |
| 238207_at   | 0.051643021 | 1.613580666 | 0.111994218 | 0.237035689 |
| 238208_at   | 0.021601487 | 0.639526139 | 0.524974465 | 0.693428662 |
| 238209_at   | -0.09270452 | -2.74424665 | 0.008038105 | 0.029213548 |
| 238210_at   | -0.03381607 | -0.98472904 | 0.328807938 | 0.511275638 |
| 238211_at   | -0.12598652 | -3.51025609 | 0.000868238 | 0.004529551 |
| 238212_at   | -0.18863066 | -3.75589549 | 0.000399664 | 0.002370508 |
| 238213_at   | -0.01461585 | -0.46333499 | 0.644841552 | 0.78438961  |
| 238214_at   | 0.112633797 | 3.441249993 | 0.001074263 | 0.00540603  |
| 238215_at   | -0.01934199 | -0.58968591 | 0.557669429 | 0.7196362   |
| 238216_at   | 0.018705093 | 0.601784433 | 0.549640232 | 0.712690537 |
| 238217_at   | -0.39725052 | -6.4225759  | 2.62E-08    | 8.96E-07    |
| 238218_at   | 0.006690669 | 0.245945263 | 0.806584512 | 0.891149168 |
| 238219_at   | -0.03403178 | -0.92788405 | 0.357276098 | 0.540351382 |
| 238220_at   | -0.05813581 | -2.24384521 | 0.028637002 | 0.082051858 |
| 238221_at   | -0.05392567 | -1.27852709 | 0.206107101 | 0.36948811  |
| 238222_at   | -0.02351403 | -0.72053658 | 0.474060885 | 0.650079134 |
| 238223_at   | 0.157964145 | 3.333378318 | 0.001491594 | 0.007130421 |
| 238224_at   | 0.198254496 | 3.066513236 | 0.003275004 | 0.01383034  |
| 238225_at   | -0.01002675 | -0.22406959 | 0.823482992 | 0.901901723 |
| 238226_at   | -0.01259581 | -0.25491856 | 0.799679043 | 0.886654158 |
| 238227_at   | 0.044979915 | 1.476137996 | 0.145263582 | 0.287485008 |
| 238228_at   | 0.005782212 | 0.193269934 | 0.847416283 | 0.916134537 |
| 238229_at   | 0.156110537 | 1.830711939 | 0.072232597 | 0.169691927 |
| 238230_x_at | 0.028356919 | 1.061958712 | 0.292613969 | 0.471108595 |
| 238231_at   | 0.03647176  | 1.111348377 | 0.270960021 | 0.446755156 |
| 238232_at   | 0.00601545  | 0.172618489 | 0.863546476 | 0.925950555 |
| 238233_at   | -0.03756942 | -1.01278526 | 0.315328723 | 0.496583466 |
| 238234_at   | -0.0378398  | -0.6665787  | 0.507658812 | 0.678802286 |
| 238235_at   | 0.005004496 | 0.153621526 | 0.878436275 | 0.934828889 |
| 238236_at   | -0.03671921 | -1.04740685 | 0.299215428 | 0.47849488  |
| 238237_at   | 0.004767678 | 0.159334334 | 0.873953688 | 0.932233954 |
| 238238_at   | 0.007117842 | 0.238447553 | 0.812366341 | 0.894706043 |
| 238239_at   | -0.09988439 | -2.44508108 | 0.017509372 | 0.055302392 |
| 238240_at   | 0.007800531 | 0.194567078 | 0.846405234 | 0.915588593 |
| 238241_at   | -0.05149927 | -1.17347192 | 0.2453569   | 0.416701143 |
| 238242_at   | 0.021436946 | 0.496959328 | 0.62107818  | 0.767280677 |
| 238243_at   | 0.014691869 | 0.451762639 | 0.653108635 | 0.789738396 |
| 238244_at   | 0.050824165 | 1.72604307  | 0.089612227 | 0.200367704 |
| 238245_at   | 0.075975114 | 1.443946253 | 0.154082523 | 0.299924047 |

|             |             |             |             |             |
|-------------|-------------|-------------|-------------|-------------|
| 238246_at   | -0.05966468 | -1.94177216 | 0.056979904 | 0.141294228 |
| 238247_at   | -0.06055819 | -1.574688   | 0.120715501 | 0.250697824 |
| 238248_at   | -0.00556962 | -0.21254312 | 0.832421384 | 0.907338268 |
| 238249_at   | 0.008714702 | 0.23502585  | 0.815008487 | 0.896410672 |
| 238250_at   | 0.022301491 | 0.530240272 | 0.597950084 | 0.750135724 |
| 238251_at   | -0.03562419 | -0.88219095 | 0.381280106 | 0.564075954 |
| 238252_at   | 0.018848609 | 0.616265366 | 0.540107416 | 0.705720987 |
| 238253_at   | -0.04261155 | -1.29089122 | 0.201813937 | 0.364114023 |
| 238254_at   | -0.02680361 | -1.06415708 | 0.291625464 | 0.470058976 |
| 238255_at   | 0.01485583  | 0.450858388 | 0.653756478 | 0.790106591 |
| 238256_at   | 0.047379657 | 1.605349741 | 0.113796115 | 0.239895092 |
| 238257_at   | -0.04419799 | -2.37202649 | 0.020996623 | 0.064062061 |
| 238258_at   | -0.00468094 | -0.15089157 | 0.880579772 | 0.936040128 |
| 238259_at   | -0.03657547 | -0.99155627 | 0.325493119 | 0.507675664 |
| 238260_at   | -0.00200693 | -0.06324732 | 0.949784934 | 0.974221117 |
| 238261_at   | -0.07008942 | -1.30483418 | 0.197053197 | 0.357966892 |
| 238262_at   | 0.005025459 | 0.149208208 | 0.881901957 | 0.936821693 |
| 238263_at   | -0.05280723 | -1.27468301 | 0.207455641 | 0.371235536 |
| 238264_at   | -0.05009279 | -1.96781168 | 0.053830648 | 0.135164857 |
| 238265_x_at | -0.03895353 | -1.04451009 | 0.300541622 | 0.479964486 |
| 238266_at   | -0.01974537 | -0.53947216 | 0.591606286 | 0.745357544 |
| 238267_s_at | -0.03107613 | -0.45464848 | 0.651042896 | 0.788435105 |
| 238268_at   | -0.05320885 | -0.9860956  | 0.328142646 | 0.510685348 |
| 238269_at   | 0.032227369 | 1.422957732 | 0.160053518 | 0.30841179  |
| 238270_x_at | 0.000720819 | 0.018142344 | 0.985586964 | 0.99310365  |
| 238271_x_at | 0.027846267 | 1.011173496 | 0.316092847 | 0.497283214 |
| 238272_at   | -0.01007729 | -0.23642248 | 0.813929787 | 0.89570927  |
| 238273_at   | 0.071852979 | 1.672966663 | 0.099667947 | 0.217087075 |
| 238274_at   | 0.007043225 | 0.181085263 | 0.856925878 | 0.921881697 |
| 238275_at   | 0.052967254 | 1.353615451 | 0.18106024  | 0.337473694 |
| 238276_at   | 0.017031915 | 0.561189034 | 0.576809715 | 0.734019925 |
| 238277_at   | 0.143571742 | 2.598963972 | 0.011812263 | 0.039937645 |
| 238278_at   | -0.04092716 | -1.17404857 | 0.245127682 | 0.416422623 |
| 238279_x_at | 0.242770392 | 5.107427028 | 3.73E-06    | 4.74E-05    |
| 238280_at   | 0.017756964 | 0.556040164 | 0.580301625 | 0.736797425 |
| 238281_at   | -0.06769702 | -1.94705581 | 0.05632847  | 0.140051848 |
| 238282_at   | -0.07702828 | -1.73618604 | 0.087789244 | 0.19731829  |
| 238283_at   | -0.04957553 | -1.56083726 | 0.12395003  | 0.255822238 |
| 238284_at   | -0.01005295 | -0.24924187 | 0.804045752 | 0.889671684 |
| 238285_at   | -0.02933741 | -0.85343575 | 0.396894813 | 0.579277985 |
| 238286_at   | 0.075503755 | 2.386081052 | 0.020281017 | 0.062294233 |
| 238287_at   | 0.00956356  | 0.3887969   | 0.698836329 | 0.821796953 |
| 238288_at   | 0.030301797 | 0.88898019  | 0.377650592 | 0.560250797 |
| 238289_at   | 0.373006612 | 4.15481235  | 0.000107345 | 0.000782107 |
| 238290_at   | 0.014941933 | 0.378784783 | 0.70621742  | 0.826778492 |
| 238291_at   | 0.022080483 | 0.947325714 | 0.34736532  | 0.530333443 |
| 238292_at   | 0.081659756 | 2.417701198 | 0.018750243 | 0.058465491 |
| 238293_at   | 0.040351693 | 1.436130603 | 0.156285374 | 0.302974518 |
| 238294_at   | -0.04305269 | -2.11446269 | 0.038742706 | 0.104187317 |
| 238295_at   | 0.189685045 | 4.80428126  | 1.12E-05    | 0.000117047 |
| 238296_at   | -0.01177208 | -0.31566621 | 0.753378029 | 0.858074132 |
| 238297_at   | -0.61103198 | -5.65733246 | 4.84E-07    | 8.82E-06    |
| 238298_at   | 0.019722639 | 0.429886661 | 0.66885571  | 0.800527554 |
| 238299_at   | -0.06179799 | -1.20399616 | 0.233434695 | 0.402106896 |
| 238300_s_at | 0.033243223 | 0.800515473 | 0.426647661 | 0.607881659 |
| 238301_at   | 0.006297817 | 0.178377102 | 0.859042427 | 0.923180901 |
| 238302_at   | -0.05385934 | -1.14925716 | 0.25512178  | 0.428385279 |
| 238303_at   | 0.155499461 | 4.146547228 | 0.000110378 | 0.000800425 |
| 238304_at   | -0.02262224 | -0.35067267 | 0.727092152 | 0.840649246 |
| 238305_at   | -0.02864447 | -0.97533065 | 0.333407736 | 0.516093742 |
| 238306_at   | -0.03786387 | -0.83269798 | 0.408397941 | 0.590587956 |
| 238307_at   | -0.0641492  | -1.74532777 | 0.086172602 | 0.194486715 |
| 238308_at   | 0.043530365 | 0.937191818 | 0.352508689 | 0.535697179 |
| 238309_x_at | -0.03086035 | -1.11317212 | 0.270182573 | 0.445841756 |
| 238310_at   | 0.000215813 | 0.004833173 | 0.996160127 | 0.998125468 |
| 238311_at   | 0.106361004 | 2.492172776 | 0.015546876 | 0.050091629 |
| 238312_s_at | 0.012422116 | 0.30329957  | 0.762736384 | 0.863563011 |
| 238313_at   | -0.01613235 | -0.29742366 | 0.767195526 | 0.866502462 |
| 238314_x_at | 0.063662432 | 1.37380261  | 0.1747386   | 0.328906721 |
| 238315_s_at | -0.02687811 | -0.81515127 | 0.418288364 | 0.600769468 |
| 238316_at   | 0.005720362 | 0.147640932 | 0.883133267 | 0.93747158  |
| 238317_x_at | -0.04884233 | -1.02355898 | 0.310252975 | 0.490895204 |
| 238318_at   | 0.051348316 | 1.958900517 | 0.054891184 | 0.137261717 |
| 238319_at   | -0.00949285 | -0.30099855 | 0.764481644 | 0.864615895 |
| 238320_at   | 0.20226449  | 2.402870639 | 0.019454817 | 0.060286236 |

|             |             |              |             |             |
|-------------|-------------|--------------|-------------|-------------|
| 238321_at   | -0.00721891 | -0.20519754  | 0.838129323 | 0.910559246 |
| 238322_s_at | 0.047468001 | 1.418379438  | 0.161379531 | 0.310249667 |
| 238323_at   | 0.068505122 | 1.881740472  | 0.064843689 | 0.156335661 |
| 238324_at   | -0.0242913  | -0.70110965  | 0.48601107  | 0.660749148 |
| 238325_s_at | -0.03107127 | -0.58928475  | 0.557936655 | 0.719758246 |
| 238326_at   | -0.10229991 | -1.41329029  | 0.162863471 | 0.312295115 |
| 238327_at   | 0.454711491 | 2.501058786  | 0.015199636 | 0.049167785 |
| 238328_at   | 0.015165165 | 0.520833081  | 0.604446755 | 0.754802153 |
| 238329_at   | 0.030210494 | 0.97451482   | 0.33380902  | 0.516535998 |
| 238330_s_at | 0.026979331 | 0.770618314  | 0.444030891 | 0.624241226 |
| 238331_at   | -0.00667444 | -0.19880915  | 0.843100607 | 0.91378325  |
| 238332_at   | -0.12901339 | -1.94995988  | 0.055973136 | 0.139338908 |
| 238333_s_at | 0.237219429 | 4.642929456  | 1.99E-05    | 0.000189945 |
| 238334_at   | 0.016006597 | 0.654024957  | 0.51565572  | 0.685801852 |
| 238335_at   | 0.025953827 | 1.12244418   | 0.26625424  | 0.441471934 |
| 238336_s_at | -0.02061165 | -0.92182184  | 0.360403431 | 0.543646218 |
| 238337_s_at | 0.022659824 | 0.607796954  | 0.54567187  | 0.70973392  |
| 238338_at   | -0.07704382 | -1.90833169  | 0.061253677 | 0.149437705 |
| 238339_x_at | 0.001343288 | 0.02813027   | 0.977653889 | 0.988754733 |
| 238340_at   | -0.01274644 | -0.42716912  | 0.670822549 | 0.801759378 |
| 238341_at   | 0.123567406 | 2.291653062  | 0.025539024 | 0.074977999 |
| 238342_at   | -0.00601383 | -0.10224472  | 0.918911701 | 0.957162209 |
| 238343_x_at | 0.001551668 | 0.084784852  | 0.932721602 | 0.965100847 |
| 238344_at   | -0.01463556 | -0.22618265  | 0.821846891 | 0.900995468 |
| 238345_at   | 0.023674833 | 0.519116773  | 0.605635546 | 0.755577808 |
| 238346_s_at | 0.101020108 | 2.020272649  | 0.047936479 | 0.123394604 |
| 238347_at   | 0.008325869 | 0.236979286  | 0.81349983  | 0.895314579 |
| 238348_x_at | 0.000368728 | 0.012360508  | 0.990180002 | 0.995348062 |
| 238349_at   | -0.06407566 | -1.84250991  | 0.070464164 | 0.166473908 |
| 238350_at   | 0.140965367 | 1.858130971  | 0.068178855 | 0.162465977 |
| 238351_x_at | 0.054676724 | 1.262143145  | 0.211900385 | 0.376944603 |
| 238352_s_at | 0.025177571 | 0.70441058   | 0.483968834 | 0.658954884 |
| 238353_at   | 0.02304635  | 0.74850032   | 0.457153919 | 0.636041786 |
| 238354_x_at | -0.05095474 | -1.91476136  | 0.060411419 | 0.147883394 |
| 238355_at   | -0.04520496 | -1.44242561  | 0.15450921  | 0.300558242 |
| 238356_at   | -0.12660284 | -4.70205072  | 1.61E-05    | 0.000159504 |
| 238357_at   | -0.05122653 | -1.35090084  | 0.181923446 | 0.338588375 |
| 238358_x_at | 0.005075086 | 0.179787648  | 0.857939892 | 0.922484052 |
| 238359_at   | -0.03393516 | -0.674466339 | 0.502670498 | 0.674837787 |
| 238360_s_at | -0.2174533  | -3.7142828   | 0.000456669 | 0.002654027 |
| 238361_s_at | -0.02191632 | -0.5916676   | 0.556350279 | 0.718603701 |
| 238362_at   | -0.04100153 | -1.49292154  | 0.140825617 | 0.28116053  |
| 238363_at   | -0.00227903 | -0.06123133  | 0.951383462 | 0.975105834 |
| 238364_x_at | 0.013818502 | 0.468245321  | 0.641347187 | 0.782076084 |
| 238365_s_at | 0.119808573 | 2.191138167  | 0.032432937 | 0.090649958 |
| 238366_at   | 0.054509015 | 1.265292624  | 0.210777471 | 0.375539256 |
| 238367_s_at | 0.027019489 | 0.707034865  | 0.482348641 | 0.657449921 |
| 238368_at   | 0.027496731 | 0.900106169  | 0.371750064 | 0.554922539 |
| 238369_s_at | -0.03381047 | -0.9415869   | 0.35027196  | 0.533404472 |
| 238370_x_at | -0.01361239 | -0.77316847  | 0.442532147 | 0.622795024 |
| 238371_s_at | -0.06802023 | -1.71118247  | 0.092339462 | 0.204948114 |
| 238372_s_at | 0.011875169 | 0.415238587  | 0.679484601 | 0.808098505 |
| 238373_at   | -0.02201951 | -0.48014139  | 0.632915359 | 0.776050186 |
| 238374_at   | -0.04543374 | -1.41006948  | 0.163808067 | 0.313811157 |
| 238375_at   | 0.02595147  | 0.720694323  | 0.473964536 | 0.650006844 |
| 238376_at   | -0.01324857 | -0.48069693  | 0.63252278  | 0.775837761 |
| 238377_s_at | 0.044079769 | 1.152334781  | 0.253865534 | 0.426958831 |
| 238378_at   | -0.546721   | -7.66201665  | 2.13E-10    | 3.39E-08    |
| 238379_x_at | -0.08356288 | -2.65699399  | 0.010144276 | 0.035278251 |
| 238380_s_at | -0.0755842  | -2.07437092  | 0.042449507 | 0.112124904 |
| 238381_x_at | -0.0215785  | -0.56222038  | 0.576111494 | 0.733381989 |
| 238382_x_at | 0.015099206 | 0.604976354  | 0.547531696 | 0.711014835 |
| 238383_at   | -0.0037321  | -0.13509694  | 0.892998473 | 0.942785836 |
| 238384_x_at | -0.07372052 | -2.56824363  | 0.012792911 | 0.042641765 |
| 238385_at   | 0.02245994  | 0.687375296  | 0.494559422 | 0.668082749 |
| 238386_x_at | -0.05361496 | -1.73249755  | 0.08844859  | 0.198331463 |
| 238387_s_at | 0.012189075 | 0.431809725  | 0.667465285 | 0.799734016 |
| 238388_x_at | -0.01030531 | -0.28531968  | 0.776405864 | 0.871933867 |
| 238389_s_at | 0.07139938  | 1.701721895  | 0.094111036 | 0.207909562 |
| 238390_at   | 0.062035828 | 1.272560152  | 0.208203169 | 0.372260203 |
| 238391_at   | -0.05583773 | -2.24075616  | 0.028848144 | 0.082545697 |
| 238392_at   | 0.021256963 | 0.820589982  | 0.415207399 | 0.597458034 |
| 238393_at   | -0.01224768 | -0.66271121  | 0.510115318 | 0.680986732 |
| 238394_at   | -0.02586987 | -1.1722011   | 0.245862595 | 0.417306259 |
| 238395_at   | -0.12343968 | -2.96617868  | 0.004358637 | 0.017611083 |

|             |             |             |             |             |
|-------------|-------------|-------------|-------------|-------------|
| 238396_at   | 0.054874538 | 1.508423265 | 0.136822238 | 0.275295311 |
| 238397_at   | -0.00666043 | -0.18784127 | 0.851650388 | 0.918571751 |
| 238398_s_at | -0.06643049 | -1.23304267 | 0.222486237 | 0.389584097 |
| 238399_x_at | -0.06855932 | -1.66627766 | 0.100998366 | 0.219255791 |
| 238400_at   | -0.00045681 | -0.01599207 | 0.987295076 | 0.993900023 |
| 238401_at   | -0.01478662 | -0.47059515 | 0.639677839 | 0.780935369 |
| 238402_s_at | 0.012366042 | 0.411323885 | 0.682336389 | 0.810026896 |
| 238403_at   | -0.06332621 | -1.76242985 | 0.083214479 | 0.189166913 |
| 238404_x_at | -0.03310744 | -0.8377513  | 0.405576281 | 0.587899508 |
| 238405_at   | 0.031583959 | 0.706262785 | 0.482824997 | 0.65793843  |
| 238406_x_at | -0.18764139 | -3.89756102 | 0.000252433 | 0.001606041 |
| 238407_at   | -0.0168839  | -0.58144851 | 0.563169491 | 0.723980178 |
| 238408_at   | 0.046453005 | 1.627618807 | 0.108974336 | 0.23228316  |
| 238409_x_at | -0.05644237 | -1.54616976 | 0.127450542 | 0.261257515 |
| 238410_x_at | -0.03822779 | -0.89792668 | 0.37290129  | 0.556005352 |
| 238411_x_at | -0.01276432 | -0.39065853 | 0.697467091 | 0.820998255 |
| 238412_at   | -0.30643666 | -4.37433718 | 5.08E-05    | 0.000416952 |
| 238413_at   | -0.06512722 | -1.95935407 | 0.054836778 | 0.137174817 |
| 238414_at   | 0.051701703 | 1.418281993 | 0.161407846 | 0.31027161  |
| 238415_at   | 0.104713155 | 2.457710361 | 0.016962295 | 0.053859957 |
| 238416_x_at | -0.1090641  | -2.68195426 | 0.00949536  | 0.033462121 |
| 238417_at   | -0.19436595 | -2.59370976 | 0.011974984 | 0.040406644 |
| 238418_at   | -0.03513172 | -0.60639096 | 0.54659854  | 0.710463632 |
| 238419_at   | -0.01155834 | -0.48984191 | 0.626075687 | 0.770927158 |
| 238420_at   | -0.12043986 | -2.03075299 | 0.046828085 | 0.121211676 |
| 238421_at   | -0.15013441 | -2.52467975 | 0.014310397 | 0.046686639 |
| 238422_at   | -0.01182009 | -0.31372715 | 0.754842989 | 0.859107744 |
| 238423_at   | 0.009482804 | 0.296858432 | 0.767624889 | 0.866899771 |
| 238424_at   | -0.03205604 | -0.97046012 | 0.335808165 | 0.518641826 |
| 238425_at   | 0.074976248 | 2.542557311 | 0.013668964 | 0.045008525 |
| 238426_at   | -0.81050529 | -5.58582808 | 6.34E-07    | 1.10E-05    |
| 238427_at   | -0.08733394 | -2.59590778 | 0.011906666 | 0.04021977  |
| 238428_at   | -0.02751397 | -0.84715345 | 0.400358226 | 0.582763137 |
| 238429_at   | 0.025604576 | 0.840192289 | 0.404217577 | 0.58645929  |
| 238430_x_at | 0.282691943 | 5.930218043 | 1.73E-07    | 3.86E-06    |
| 238431_at   | 0.213202208 | 2.938229104 | 0.004715185 | 0.018800163 |
| 238432_at   | 0.289020846 | 4.347935338 | 5.56E-05    | 0.000450765 |
| 238433_at   | -0.01166519 | -0.38318471 | 0.702970183 | 0.824683521 |
| 238434_at   | -0.03037601 | -0.889663   | 0.377286778 | 0.559932659 |
| 238435_at   | -0.08224571 | -2.1930438  | 0.032288342 | 0.090353177 |
| 238436_s_at | 0.156486486 | 3.053521998 | 0.003399544 | 0.014282048 |
| 238437_at   | 0.137951898 | 3.687355085 | 0.00049762  | 0.002853485 |
| 238438_at   | -0.04541544 | -1.08499247 | 0.282371088 | 0.459668804 |
| 238439_at   | -0.00921128 | -0.17897462 | 0.858575347 | 0.922923067 |
| 238440_at   | -0.06459836 | -1.20212113 | 0.234154683 | 0.403005395 |
| 238441_at   | -0.3723531  | -5.10014352 | 3.83E-06    | 4.85E-05    |
| 238442_at   | -0.04012335 | -1.00732586 | 0.31792202  | 0.499194425 |
| 238443_at   | -0.11923706 | -3.09088307 | 0.003052804 | 0.013036532 |
| 238444_at   | 0.137369718 | 3.901375986 | 0.0002493   | 0.001590083 |
| 238445_x_at | -0.2315769  | -4.17951356 | 9.88E-05    | 0.000729128 |
| 238446_at   | 0.021165259 | 0.46843375  | 0.641213256 | 0.782019452 |
| 238447_at   | 0.575677305 | 6.700507284 | 8.95E-09    | 4.13E-07    |
| 238448_at   | 0.025424229 | 0.706121052 | 0.482912472 | 0.657986303 |
| 238449_at   | 0.084695482 | 1.263567279 | 0.211392076 | 0.376320839 |
| 238450_at   | -0.04200567 | -0.97913767 | 0.331539381 | 0.514109781 |
| 238451_at   | -0.13261144 | -5.69768949 | 4.16E-07    | 7.81E-06    |
| 238452_at   | 0.001316185 | 0.031838891 | 0.97470879  | 0.987265038 |
| 238453_at   | -0.03584928 | -0.87673127 | 0.384214721 | 0.566836314 |
| 238454_at   | -0.22151965 | -3.23492453 | 0.002002335 | 0.009118441 |
| 238455_at   | 0.273773822 | 3.690216187 | 0.000493108 | 0.002831188 |
| 238456_at   | 0.103515373 | 2.776855116 | 0.007359986 | 0.027135166 |
| 238457_at   | -0.18787987 | -3.65004702 | 0.000560195 | 0.003153181 |
| 238458_at   | -0.68239727 | -6.5902644  | 1.37E-08    | 5.66E-07    |
| 238459_x_at | 0.092775283 | 2.003299606 | 0.049779502 | 0.127033946 |
| 238460_at   | 0.019994862 | 0.661335623 | 0.510990584 | 0.681808961 |
| 238461_at   | -0.36569675 | -5.02005779 | 5.13E-06    | 6.15E-05    |
| 238462_at   | -0.23669604 | -3.66351154 | 0.000536791 | 0.003040977 |
| 238463_at   | 0.015081347 | 0.414933509 | 0.679706676 | 0.808127799 |
| 238464_at   | -0.08579863 | -3.63937924 | 0.000579427 | 0.003246303 |
| 238465_at   | -0.00978121 | -0.14978915 | 0.881445624 | 0.9366129   |
| 238466_at   | -0.47757182 | -5.22894559 | 2.39E-06    | 3.27E-05    |
| 238467_at   | -0.06288676 | -1.38717276 | 0.170645665 | 0.323321013 |
| 238468_at   | 0.136293515 | 2.469554007 | 0.016463281 | 0.052502995 |
| 238469_at   | 0.171232093 | 1.846818004 | 0.069827557 | 0.165398196 |
| 238470_at   | -0.09139296 | -2.93450694 | 0.00476466  | 0.018953467 |



|             |             |             |             |             |
|-------------|-------------|-------------|-------------|-------------|
| 238471_at   | -0.05089365 | -1.63948157 | 0.106474221 | 0.228140085 |
| 238472_at   | -0.09984328 | -2.34395237 | 0.022493949 | 0.067706058 |
| 238473_at   | -0.01873408 | -0.33734835 | 0.737060385 | 0.847240296 |
| 238474_at   | -0.05106776 | -1.33425754 | 0.187284348 | 0.345254762 |
| 238475_at   | -0.02137224 | -0.7971308  | 0.428594966 | 0.60979136  |
| 238476_at   | 0.133218355 | 2.524429429 | 0.014319568 | 0.04671315  |
| 238477_at   | 0.360238174 | 6.621321474 | 1.22E-08    | 5.19E-07    |
| 238478_at   | 0.121399679 | 2.546739289 | 0.013522727 | 0.044621805 |
| 238479_at   | -0.01385256 | -0.28274722 | 0.778367549 | 0.872943601 |
| 238480_at   | -0.0357223  | -0.7714742  | 0.443527549 | 0.623749433 |
| 238481_at   | 0.008628732 | 0.318525442 | 0.751219554 | 0.856870139 |
| 238482_at   | 0.103416232 | 2.329619055 | 0.023294536 | 0.069698026 |
| 238483_at   | -0.26567662 | -3.94563692 | 0.000215578 | 0.001404257 |
| 238484_s_at | -0.40754018 | -6.0920165  | 9.31E-08    | 2.39E-06    |
| 238485_at   | 0.090598239 | 2.860898144 | 0.005847614 | 0.022419282 |
| 238486_at   | -0.03431826 | -0.78903117 | 0.433276399 | 0.61410595  |
| 238487_at   | -0.27103568 | -4.74434125 | 1.39E-05    | 0.00013995  |
| 238488_at   | 0.034991894 | 0.543949912 | 0.588540811 | 0.743189379 |
| 238489_at   | -0.01439894 | -0.57018342 | 0.57073431  | 0.729195477 |
| 238490_at   | -0.11057237 | -2.46584919 | 0.016617938 | 0.052920685 |
| 238491_at   | -0.06238518 | -1.48449903 | 0.143039179 | 0.284322496 |
| 238492_at   | 0.181058202 | 4.442893958 | 4.00E-05    | 0.000342378 |
| 238493_at   | -0.03084485 | -0.5209733  | 0.604349683 | 0.754774236 |
| 238494_at   | 0.101069591 | 1.590196901 | 0.11717453  | 0.245258715 |
| 238495_at   | -0.05396081 | -1.38257239 | 0.17204556  | 0.325228838 |
| 238496_at   | 0.048403217 | 1.590258697 | 0.11716059  | 0.245241023 |
| 238497_at   | 0.133106206 | 2.409839669 | 0.019120828 | 0.059437091 |
| 238498_at   | 0.228150346 | 2.422397516 | 0.018531951 | 0.05789557  |
| 238499_at   | 0.024044029 | 0.523564793 | 0.602556868 | 0.753545949 |
| 238500_at   | -0.01850238 | -0.64020026 | 0.524539239 | 0.693058615 |
| 238501_at   | -0.01076064 | -0.29286614 | 0.770659626 | 0.868746406 |
| 238502_at   | 0.021223438 | 0.661672001 | 0.510776477 | 0.681584328 |
| 238503_at   | -0.00240691 | -0.08059207 | 0.936041147 | 0.96673563  |
| 238504_at   | -0.10942988 | -1.81240414 | 0.075050521 | 0.174704823 |
| 238505_at   | -0.05276135 | -1.39629173 | 0.167896651 | 0.31960291  |
| 238506_at   | 0.023498944 | 0.762451583 | 0.448850499 | 0.628317631 |
| 238507_at   | -0.08543345 | -2.56642674 | 0.012853162 | 0.042794718 |
| 238508_at   | -0.03925358 | -0.9749848  | 0.333577808 | 0.516231843 |
| 238509_at   | 0.087380986 | 3.291926972 | 0.001689486 | 0.007912279 |
| 238510_at   | 0.024904425 | 0.516188145 | 0.607666518 | 0.757308275 |
| 238511_at   | 0.019961954 | 0.565074866 | 0.57418113  | 0.732029755 |
| 238512_at   | -0.50493149 | -6.66993102 | 1.01E-08    | 4.50E-07    |
| 238513_at   | 0.086758121 | 2.110882321 | 0.039061868 | 0.104818554 |
| 238514_at   | -0.26384376 | -4.76875334 | 1.27E-05    | 0.000130011 |
| 238515_at   | 0.173920228 | 4.60825742  | 2.24E-05    | 0.000210264 |
| 238516_at   | -0.20914148 | -4.17019268 | 0.000101913 | 0.000749128 |
| 238517_at   | -0.00588983 | -0.18330879 | 0.85518888  | 0.920801297 |
| 238518_x_at | 0.010093562 | 0.256617949 | 0.798373054 | 0.885843455 |
| 238519_at   | 0.031846199 | 0.799768241 | 0.427077111 | 0.608367764 |
| 238520_at   | -0.54052912 | -6.80515216 | 5.96E-09    | 3.13E-07    |
| 238521_at   | -0.85670196 | -6.39712648 | 2.89E-08    | 9.68E-07    |
| 238522_at   | 0.003305999 | 0.084429231 | 0.933003112 | 0.965270963 |
| 238523_at   | 0.037769751 | 0.666903148 | 0.507453022 | 0.678697935 |
| 238524_at   | 0.035633255 | 1.12580672  | 0.26483963  | 0.439779027 |
| 238525_at   | 0.07893643  | 2.422695635 | 0.018518171 | 0.057875112 |
| 238526_at   | -0.05990727 | -1.4212238  | 0.16055472  | 0.30911608  |
| 238527_at   | -0.00298111 | -0.11061003 | 0.912303769 | 0.953657671 |
| 238528_at   | -0.02834654 | -0.91833915 | 0.362208007 | 0.545447815 |
| 238529_at   | -0.01350195 | -0.36622048 | 0.715520209 | 0.833243436 |
| 238530_at   | -0.15508855 | -4.8206797  | 1.05E-05    | 0.000111543 |
| 238531_x_at | 0.042517418 | 1.44097699  | 0.154916545 | 0.301153991 |
| 238532_at   | 0.192972041 | 4.750320955 | 1.36E-05    | 0.000137464 |
| 238533_at   | -0.66020358 | -6.94421674 | 3.48E-09    | 2.15E-07    |
| 238534_at   | 0.122696634 | 2.445204754 | 0.017503939 | 0.055289139 |
| 238535_at   | -0.04250369 | -1.3156356  | 0.193423467 | 0.353357822 |
| 238536_at   | -0.17700564 | -3.09818693 | 0.002989006 | 0.012801595 |
| 238537_at   | 0.190288061 | 3.937758783 | 0.00022124  | 0.001437579 |
| 238538_at   | 0.025081778 | 0.486999391 | 0.628076522 | 0.772525305 |
| 238539_at   | 0.026240085 | 0.575885067 | 0.566899292 | 0.726828527 |
| 238540_at   | -0.07262278 | -1.25331138 | 0.215072901 | 0.380885961 |
| 238541_at   | 0.046665017 | 1.183195616 | 0.241512343 | 0.411830655 |
| 238542_at   | -0.03789521 | -1.29227852 | 0.201336432 | 0.363491973 |
| 238543_x_at | -0.02477319 | -0.59468138 | 0.554347088 | 0.71669984  |
| 238544_at   | 0.08210808  | 2.722006007 | 0.008533034 | 0.03067061  |
| 238545_at   | 0.081015724 | 2.224028228 | 0.030015572 | 0.0851601   |

|             |             |             |             |             |
|-------------|-------------|-------------|-------------|-------------|
| 238546_at   | -0.22758841 | -4.54682853 | 2.79E-05    | 0.000252171 |
| 238547_at   | -0.0968745  | -2.31482145 | 0.024147579 | 0.071726943 |
| 238548_at   | -0.01219412 | -0.33974119 | 0.735266847 | 0.846005507 |
| 238549_at   | 0.299754771 | 4.354783565 | 5.43E-05    | 0.000441601 |
| 238550_at   | 0.026410905 | 0.686841788 | 0.494893137 | 0.668322792 |
| 238551_at   | -0.10998493 | -3.57636304 | 0.000706537 | 0.003822364 |
| 238552_at   | -0.004347   | -0.15908494 | 0.874149293 | 0.932239193 |
| 238553_at   | 0.005020476 | 0.132349144 | 0.895161798 | 0.943885127 |
| 238554_at   | -0.47776798 | -7.64796332 | 2.25E-10    | 3.47E-08    |
| 238555_at   | 0.106842287 | 4.479378372 | 3.53E-05    | 0.000308231 |
| 238556_at   | 0.15672831  | 4.141969526 | 0.000112094 | 0.000810499 |
| 238557_at   | -0.00584077 | -0.16515516 | 0.869390606 | 0.92936292  |
| 238558_at   | 0.211198017 | 4.424102014 | 4.27E-05    | 0.000361505 |
| 238559_at   | -0.08414898 | -2.51025009 | 0.014847849 | 0.048169286 |
| 238560_at   | 0.294265235 | 5.411396628 | 1.22E-06    | 1.87E-05    |
| 238561_s_at | -0.04952534 | -1.59125507 | 0.11693601  | 0.24489554  |
| 238562_at   | -0.05424528 | -2.58753334 | 0.012168871 | 0.040946482 |
| 238563_at   | 0.201928503 | 3.367506515 | 0.001345315 | 0.006538147 |
| 238564_at   | -0.00576822 | -0.17555068 | 0.861252508 | 0.924355733 |
| 238565_at   | 0.075256906 | 2.043344873 | 0.04552569  | 0.118540791 |
| 238566_at   | -0.01896848 | -0.47995481 | 0.633047235 | 0.776148003 |
| 238567_at   | -0.50465455 | -5.46867242 | 9.82E-07    | 1.57E-05    |
| 238568_s_at | 0.331086379 | 5.957359774 | 1.56E-07    | 3.55E-06    |
| 238569_at   | 0.10915649  | 2.517539412 | 0.014574109 | 0.047422358 |
| 238570_at   | 0.005143522 | 0.153684836 | 0.878386577 | 0.934828889 |
| 238571_at   | 0.002621931 | 0.075746148 | 0.939879215 | 0.968554696 |
| 238572_at   | 0.00129917  | 0.041140771 | 0.967323605 | 0.983408625 |
| 238573_at   | 0.543469943 | 8.200363819 | 2.64E-11    | 1.02E-08    |
| 238574_at   | -0.03257107 | -0.74632258 | 0.458457994 | 0.637108354 |
| 238575_at   | -0.07524733 | -1.51175486 | 0.135973711 | 0.274069232 |
| 238576_at   | 0.082249082 | 3.003294431 | 0.003923834 | 0.016140266 |
| 238577_s_at | 0.151324081 | 3.130196393 | 0.002723845 | 0.011841838 |
| 238578_at   | -0.00739075 | -0.27238396 | 0.786284842 | 0.878186734 |
| 238579_at   | -0.04607111 | -1.44286123 | 0.154386883 | 0.300385659 |
| 238580_at   | 0.090350303 | 2.282548779 | 0.026104995 | 0.076335587 |
| 238581_at   | 0.026075254 | 1.057166937 | 0.294776594 | 0.473617902 |
| 238582_at   | 0.00517132  | 0.189606108 | 0.850273409 | 0.917790082 |
| 238583_at   | 0.06227153  | 1.738431245 | 0.08738989  | 0.196618454 |
| 238584_at   | 0.472176096 | 4.297878177 | 6.60E-05    | 0.000519174 |
| 238585_at   | -0.04948619 | -1.16595072 | 0.248360698 | 0.420572003 |
| 238586_at   | -0.00529039 | -0.16702197 | 0.867928112 | 0.928444781 |
| 238587_at   | -0.08631411 | -2.94371306 | 0.004643159 | 0.018561009 |
| 238588_at   | -0.05543238 | -2.1703228  | 0.034049781 | 0.094225802 |
| 238589_s_at | 0.1650012   | 5.221086606 | 2.46E-06    | 3.36E-05    |
| 238590_x_at | 0.046164048 | 0.80737784  | 0.422715814 | 0.604621877 |
| 238591_at   | 0.048570329 | 1.040493449 | 0.302387154 | 0.481998954 |
| 238592_at   | 0.022691061 | 0.491952788 | 0.62459168  | 0.769814714 |
| 238593_at   | -0.28968094 | -3.76022493 | 0.000394141 | 0.002341478 |
| 238594_x_at | -0.24162348 | -5.19346362 | 2.72E-06    | 3.65E-05    |
| 238595_at   | 0.118868901 | 2.838123367 | 0.006226243 | 0.023631698 |
| 238596_at   | 0.077958539 | 2.372219289 | 0.020986655 | 0.064040857 |
| 238597_at   | -0.14816091 | -4.29102277 | 6.76E-05    | 0.000529173 |
| 238598_s_at | 0.053976013 | 1.318403292 | 0.192501564 | 0.352088393 |
| 238599_at   | -0.02973368 | -0.82260638 | 0.414068637 | 0.596267497 |
| 238600_at   | -0.72537874 | -7.54464039 | 3.37E-10    | 4.60E-08    |
| 238601_at   | -0.18848955 | -2.92049923 | 0.004955204 | 0.019580723 |
| 238602_at   | 0.154365894 | 3.741455412 | 0.000418626 | 0.002463687 |
| 238603_at   | -0.03306425 | -1.05246177 | 0.2969108   | 0.475900637 |
| 238604_at   | 0.261017774 | 3.820009665 | 0.000324967 | 0.001990058 |
| 238605_at   | -0.30722733 | -3.20360506 | 0.002196676 | 0.009868701 |
| 238606_at   | -0.06886457 | -1.74516814 | 0.086200619 | 0.194520477 |
| 238607_at   | -0.07818163 | -2.24342903 | 0.028665369 | 0.082119406 |
| 238608_at   | -0.11465852 | -3.22574384 | 0.002057558 | 0.009329045 |
| 238609_at   | -0.01919071 | -0.55809107 | 0.578909506 | 0.735686523 |
| 238610_s_at | 0.035296904 | 0.804392724 | 0.424423478 | 0.605923918 |
| 238611_at   | 0.039102307 | 1.028518218 | 0.307935257 | 0.48831716  |
| 238612_at   | -0.09568133 | -2.77701481 | 0.007356798 | 0.027127891 |
| 238613_at   | 0.085984405 | 2.219780201 | 0.030318592 | 0.085829736 |
| 238614_x_at | -0.01370307 | -0.41304036 | 0.681085392 | 0.809205348 |
| 238615_at   | -0.03367741 | -0.83237688 | 0.408577643 | 0.590771362 |
| 238616_at   | 0.122000126 | 2.181487954 | 0.033173942 | 0.092316925 |
| 238617_at   | -0.00104672 | -0.02251538 | 0.982113382 | 0.991049951 |
| 238618_at   | -0.01380275 | -0.42673833 | 0.671134549 | 0.80192918  |
| 238619_at   | 0.158093254 | 2.350697532 | 0.022125757 | 0.066840904 |
| 238620_at   | 0.29309137  | 3.996122704 | 0.00018247  | 0.00122062  |

|             |             |             |             |              |
|-------------|-------------|-------------|-------------|--------------|
| 238621_at   | 0.044990987 | 1.110006919 | 0.271532877 | 0.44745137   |
| 238622_at   | -0.25666968 | -6.44036395 | 2.44E-08    | 8.53E-07     |
| 238623_at   | -0.31232962 | -3.5240731  | 0.000831774 | 0.004371143  |
| 238624_at   | -0.09402404 | -2.00936333 | 0.049114189 | 0.125716571  |
| 238625_at   | -0.0731197  | -2.7267998  | 0.008424052 | 0.030357016  |
| 238626_at   | -0.0170665  | -0.40983278 | 0.683423861 | 0.810755162  |
| 238627_at   | -0.0078444  | -0.29245663 | 0.770971118 | 0.868878385  |
| 238628_s_at | -0.01924003 | -0.67664214 | 0.501296802 | 0.673620875  |
| 238629_x_at | -0.01004639 | -0.27897851 | 0.781244078 | 0.874989828  |
| 238630_at   | -0.08383941 | -2.62102673 | 0.011150714 | 0.038097067  |
| 238631_at   | 0.153255371 | 3.017491467 | 0.003768471 | 0.015596838  |
| 238632_at   | -0.06889152 | -2.2489387  | 0.028291833 | 0.081239952  |
| 238633_at   | 0.00550327  | 0.142669208 | 0.887041139 | 0.939332329  |
| 238634_x_at | -0.01756609 | -0.80021735 | 0.42681897  | 0.608059578  |
| 238635_at   | 0.271706825 | 5.507046636 | 8.51E-07    | 1.40E-05     |
| 238636_at   | -0.27588478 | -5.47591006 | 9.56E-07    | 1.54E-05     |
| 238637_at   | -0.02204726 | -0.66672899 | 0.50756348  | 0.67871078   |
| 238638_at   | -0.02179099 | -0.60634444 | 0.546629218 | 0.710463632  |
| 238639_x_at | 0.000831271 | 0.027105401 | 0.978467818 | 0.989023718  |
| 238640_at   | -0.03347256 | -1.24877609 | 0.216715637 | 0.382828068  |
| 238641_at   | 0.06693372  | 1.749609742 | 0.085423896 | 0.193157842  |
| 238642_at   | 0.164562899 | 3.481122055 | 0.000950168 | 0.00488608   |
| 238643_at   | -0.09043087 | -2.53827731 | 0.01382011  | 0.045428681  |
| 238644_at   | -0.10952395 | -2.68771831 | 0.009351006 | 0.033055049  |
| 238645_at   | 0.030515796 | 0.740224627 | 0.462120929 | 0.640283076  |
| 238646_at   | 0.157927154 | 2.259677114 | 0.027576152 | 0.079547756  |
| 238647_at   | -0.02373153 | -0.60125779 | 0.549988516 | 0.712982938  |
| 238648_at   | -0.03267946 | -0.69930291 | 0.487130897 | 0.661585461  |
| 238649_at   | 0.063674084 | 0.669076254 | 0.506075835 | 0.677597927  |
| 238650_x_at | -0.01473105 | -0.59786835 | 0.552232733 | 0.714689871  |
| 238651_at   | 0.118949402 | 1.838248087 | 0.071098733 | 0.167618536  |
| 238652_at   | -0.04442584 | -1.09732711 | 0.276989702 | 0.453551102  |
| 238653_at   | 0.243647715 | 4.615768839 | 2.19E-05    | 0.000205934  |
| 238654_at   | -0.15464812 | -4.42387331 | 4.28E-05    | 0.000361699  |
| 238655_at   | 0.017051307 | 0.450527178 | 0.653993837 | 0.790206196  |
| 238656_at   | -0.15003131 | -2.94703676 | 0.004600005 | 0.018418153  |
| 238657_at   | 0.133537286 | 2.49900653  | 0.015279204 | 0.049395667  |
| 238658_at   | -0.62150577 | -5.93714455 | 1.68E-07    | 3.78E-06     |
| 238659_at   | 0.066980586 | 1.494272595 | 0.140473067 | 0.280732564  |
| 238660_at   | 0.132110312 | 3.022149202 | 0.003718763 | 0.015418771  |
| 238661_at   | -0.41818708 | -5.4353137  | 1.11E-06    | 1.74E-05     |
| 238662_at   | 0.093886123 | 2.090392062 | 0.040932827 | 0.108916999  |
| 238663_x_at | -0.04101393 | -0.46187731 | 0.645880444 | 0.785154933  |
| 238664_s_at | -0.04924865 | -1.18961796 | 0.238997039 | 0.408709652  |
| 238665_at   | -0.05696063 | -1.45940702 | 0.149796267 | 0.293923466  |
| 238666_at   | 0.266899145 | 5.086195258 | 4.03E-06    | 5.05E-05     |
| 238667_at   | -0.04059555 | -1.00560737 | 0.318741287 | 0.500129397  |
| 238668_at   | 0.11773563  | 1.959248732 | 0.054849409 | 0.13718589   |
| 238669_at   | 0.004279462 | 0.130265162 | 0.896803041 | 0.944679603  |
| 238670_at   | 0.013121796 | 0.333089691 | 0.740256078 | 0.8492294701 |
| 238671_at   | 0.023696157 | 0.49505514  | 0.622413466 | 0.768040826  |
| 238672_at   | -0.00678826 | -0.23036994 | 0.818607112 | 0.898854824  |
| 238673_at   | -0.76360867 | -6.78727273 | 6.39E-09    | 3.28E-07     |
| 238674_at   | -0.02438248 | -0.6230173  | 0.535691788 | 0.702024379  |
| 238675_x_at | -0.08605389 | -2.2314762  | 0.029490735 | 0.083953189  |
| 238676_at   | 0.048831064 | 1.368626138 | 0.176343283 | 0.331028814  |
| 238677_at   | -0.05135921 | -2.29074735 | 0.025594836 | 0.07510036   |
| 238678_at   | 0.091212854 | 2.167449201 | 0.034278453 | 0.094700662  |
| 238679_at   | -0.01881461 | -0.47721055 | 0.634988233 | 0.777446183  |
| 238680_at   | 0.053353083 | 1.789055665 | 0.078777341 | 0.181404954  |
| 238681_at   | -0.30972921 | -3.42022393 | 0.001145747 | 0.005705373  |
| 238682_at   | -0.04362741 | -0.73436906 | 0.465653985 | 0.643275414  |
| 238683_at   | 0.059137359 | 1.607041893 | 0.113423772 | 0.239245574  |
| 238684_at   | 0.008437706 | 0.289775227 | 0.773011653 | 0.870071411  |
| 238685_at   | -0.01118145 | -0.32907186 | 0.743275275 | 0.851197689  |
| 238686_at   | -0.22370637 | -2.87003768 | 0.005701745 | 0.021952372  |
| 238687_x_at | -0.04437888 | -1.81513563 | 0.074624337 | 0.173948305  |
| 238688_at   | 0.023158923 | 0.723156099 | 0.472462294 | 0.648677098  |
| 238689_at   | 0.038749312 | 1.359562693 | 0.179180011 | 0.334913554  |
| 238690_at   | 0.000570747 | 0.016771704 | 0.98667575  | 0.993477957  |
| 238691_at   | 0.01043783  | 0.377362215 | 0.707268484 | 0.827611561  |
| 238692_at   | -0.20335051 | -4.24872348 | 7.81E-05    | 0.000598914  |
| 238693_at   | 0.070766906 | 2.101839265 | 0.039878203 | 0.106624987  |
| 238694_at   | -0.44527071 | -4.94059935 | 6.85E-06    | 7.83E-05     |
| 238695_s_at | -0.51693717 | -5.00804661 | 5.36E-06    | 6.38E-05     |

|             |             |             |             |             |
|-------------|-------------|-------------|-------------|-------------|
| 238696_at   | -0.01800755 | -0.67698181 | 0.501082822 | 0.673500154 |
| 238697_at   | -0.87236465 | -6.76838792 | 6.88E-09    | 3.44E-07    |
| 238698_at   | -0.01994021 | -0.6600583  | 0.511804047 | 0.682588674 |
| 238699_s_at | 0.050967195 | 0.930485593 | 0.355939419 | 0.539022924 |
| 238700_at   | -0.01038653 | -0.28376233 | 0.777593286 | 0.87253651  |
| 238701_x_at | -0.01773119 | -0.32515727 | 0.746220792 | 0.853167885 |
| 238702_at   | -0.10962018 | -2.65507861 | 0.010195708 | 0.035430105 |
| 238703_at   | -0.0061132  | -0.1969491  | 0.844549259 | 0.914474412 |
| 238704_at   | -0.01376649 | -0.27505107 | 0.784245026 | 0.876850763 |
| 238705_at   | 0.061471469 | 2.074924872 | 0.042396263 | 0.112002389 |
| 238706_at   | 0.079433248 | 1.401011453 | 0.166487297 | 0.317691248 |
| 238707_at   | 0.032719286 | 1.052683967 | 0.296809774 | 0.475841103 |
| 238708_at   | -0.0239792  | -0.67428407 | 0.50278365  | 0.674938555 |
| 238709_at   | -0.04043671 | -1.66228692 | 0.101799    | 0.220661601 |
| 238710_at   | -0.00377851 | -0.10980429 | 0.912939976 | 0.9538542   |
| 238711_s_at | 0.014814273 | 0.351231271 | 0.72667527  | 0.840406445 |
| 238712_at   | -0.08707538 | -1.14797718 | 0.255645554 | 0.429039095 |
| 238713_at   | -0.01068251 | -0.50176243 | 0.617715762 | 0.765189689 |
| 238714_at   | 0.209715325 | 3.581899405 | 0.000694383 | 0.00377076  |
| 238715_at   | 0.079083061 | 2.232988764 | 0.029385144 | 0.083728457 |
| 238716_at   | -0.02779812 | -0.48332716 | 0.630665541 | 0.774443992 |
| 238717_at   | -0.0636094  | -1.08495291 | 0.282388462 | 0.459668804 |
| 238718_at   | 0.611068995 | 5.48632758  | 9.20E-07    | 1.49E-05    |
| 238719_at   | -0.38248843 | -4.70080873 | 1.62E-05    | 0.000160046 |
| 238720_at   | 0.054714696 | 1.439910192 | 0.155217051 | 0.301580751 |
| 238721_at   | -0.02736826 | -0.49149571 | 0.624912886 | 0.770091307 |
| 238722_x_at | 0.159268448 | 1.909987091 | 0.061035879 | 0.149028381 |
| 238723_at   | 0.121634954 | 2.35470124  | 0.021909762 | 0.066340859 |
| 238724_at   | 0.105358185 | 2.774826641 | 0.007400584 | 0.027260109 |
| 238725_at   | 0.07364655  | 1.235047592 | 0.221744673 | 0.388712019 |
| 238726_at   | 0.012053581 | 0.317654199 | 0.751877058 | 0.857266523 |
| 238727_at   | -0.89368706 | -7.16455397 | 1.48E-09    | 1.20E-07    |
| 238728_at   | -0.15805912 | -4.30419248 | 6.46E-05    | 0.000509589 |
| 238729_x_at | -0.01333687 | -0.58054151 | 0.563776727 | 0.724323276 |
| 238730_at   | -0.03114818 | -0.75725065 | 0.451935645 | 0.631267169 |
| 238731_at   | 0.009196316 | 0.354400654 | 0.724311539 | 0.838885956 |
| 238732_at   | -0.0755912  | -1.27878991 | 0.206015139 | 0.369367698 |
| 238733_at   | 0.135513444 | 3.04225395  | 0.003511132 | 0.014676079 |
| 238734_at   | -0.0987863  | -1.87200208 | 0.066202264 | 0.158853281 |
| 238735_at   | 0.265643906 | 3.975726186 | 0.000195209 | 0.001290575 |
| 238736_at   | 0.231558013 | 3.43945867  | 0.001080184 | 0.005429714 |
| 238737_at   | -0.04113966 | -1.14881493 | 0.255302654 | 0.428565781 |
| 238738_at   | 0.094554075 | 2.848188879 | 0.006056195 | 0.023080369 |
| 238739_at   | 0.018557545 | 0.465132148 | 0.643561692 | 0.783481561 |
| 238740_at   | -0.23842553 | -5.27663879 | 2.00E-06    | 2.84E-05    |
| 238741_at   | -0.05453177 | -1.77620218 | 0.080894075 | 0.185239432 |
| 238742_x_at | 0.000599289 | 0.020607165 | 0.983629073 | 0.99200796  |
| 238743_at   | -0.02343107 | -0.54480142 | 0.587958717 | 0.742730179 |
| 238744_at   | 0.115342568 | 2.721522134 | 0.008544106 | 0.030702999 |
| 238745_at   | 0.046097183 | 1.216428001 | 0.228701717 | 0.396275623 |
| 238746_at   | 0.091352763 | 2.53067359  | 0.014092369 | 0.046126861 |
| 238747_at   | -1.04494686 | -6.66048641 | 1.04E-08    | 4.61E-07    |
| 238748_at   | -0.00952505 | -0.32961478 | 0.742867061 | 0.851003889 |
| 238749_at   | -0.0134552  | -0.41068049 | 0.682805536 | 0.81042955  |
| 238750_at   | 0.028464942 | 0.796980856 | 0.428681354 | 0.60981659  |
| 238751_at   | -0.12064811 | -1.3711404  | 0.175562472 | 0.330103833 |
| 238752_at   | -0.22231905 | -5.10277989 | 3.80E-06    | 4.81E-05    |
| 238753_at   | -0.02111005 | -0.61110631 | 0.543493877 | 0.708055046 |
| 238754_at   | 0.002831885 | 0.064792969 | 0.948559496 | 0.973612168 |
| 238755_at   | 0.081220515 | 1.897005405 | 0.062761635 | 0.152409733 |
| 238756_at   | 0.04443773  | 1.249364294 | 0.216502061 | 0.382628523 |
| 238757_at   | -0.0842883  | -2.99198206 | 0.004051878 | 0.016567842 |
| 238758_at   | 0.088378948 | 2.004880002 | 0.049605358 | 0.126690819 |
| 238759_at   | -0.0387896  | -0.95604742 | 0.342978111 | 0.525844862 |
| 238760_at   | -0.03927024 | -1.07890812 | 0.285052192 | 0.462751637 |
| 238761_at   | 0.359281243 | 5.970746882 | 1.48E-07    | 3.41E-06    |
| 238762_at   | 0.174024695 | 2.569588173 | 0.01274849  | 0.042519068 |
| 238763_at   | -0.50638888 | -6.43672749 | 2.48E-08    | 8.59E-07    |
| 238764_at   | -0.00255282 | -0.06728484 | 0.946584129 | 0.972417342 |
| 238765_at   | 0.034379707 | 1.008502168 | 0.317362048 | 0.49870063  |
| 238766_at   | 0.059468501 | 1.43043956  | 0.157904762 | 0.305289826 |
| 238767_at   | 0.074373464 | 1.845968253 | 0.06995274  | 0.165615715 |
| 238768_at   | 0.381965475 | 5.653209489 | 4.92E-07    | 8.92E-06    |
| 238769_at   | 0.413131654 | 5.253244342 | 2.18E-06    | 3.04E-05    |
| 238770_at   | -0.01475151 | -0.29958028 | 0.765557973 | 0.865327054 |

|             |             |             |             |             |
|-------------|-------------|-------------|-------------|-------------|
| 238771_at   | 0.129517624 | 2.593161886 | 0.011992069 | 0.040452074 |
| 238772_at   | -0.06091397 | -1.28283297 | 0.204604323 | 0.367693771 |
| 238773_at   | 0.039495405 | 1.34722261  | 0.183098061 | 0.34003817  |
| 238774_at   | 0.311740227 | 1.327184646 | 0.189598471 | 0.348260855 |
| 238775_at   | -0.10159918 | -1.82349764 | 0.073332227 | 0.171625675 |
| 238776_x_at | 0.015530002 | 0.528092004 | 0.599430825 | 0.751156277 |
| 238777_x_at | -0.08747445 | -2.41915479 | 0.018682433 | 0.058282514 |
| 238778_at   | -0.38388233 | -5.72673957 | 3.73E-07    | 7.14E-06    |
| 238779_at   | 0.010321877 | 0.260196387 | 0.795624903 | 0.883957345 |
| 238780_s_at | -0.03739664 | -0.89885535 | 0.37241048  | 0.5555561   |
| 238781_at   | -0.16025647 | -4.09680454 | 0.000130463 | 0.000923597 |
| 238782_at   | -0.46099619 | -6.39018678 | 2.97E-08    | 9.87E-07    |
| 238783_at   | 0.129216263 | 3.388443128 | 0.001262408 | 0.006193144 |
| 238784_at   | -0.31055495 | -5.85769511 | 2.27E-07    | 4.76E-06    |
| 238785_at   | -0.00503137 | -0.10461999 | 0.917034827 | 0.955974545 |
| 238786_at   | -0.49237916 | -6.15271512 | 7.38E-08    | 1.99E-06    |
| 238787_at   | -0.16212778 | -2.88310964 | 0.005498958 | 0.021301849 |
| 238788_at   | 0.082341245 | 1.808077968 | 0.075729691 | 0.175955385 |
| 238789_at   | 0.03238748  | 0.892128391 | 0.375975005 | 0.558780052 |
| 238790_at   | 0.018452806 | 0.541540318 | 0.590189488 | 0.744285917 |
| 238791_at   | 0.06063893  | 2.535132868 | 0.013932117 | 0.045692682 |
| 238792_at   | -0.03680918 | -0.85204023 | 0.397662556 | 0.580018112 |
| 238793_at   | 0.011013821 | 0.432272367 | 0.667130957 | 0.79956139  |
| 238794_at   | -0.05903349 | -1.12122165 | 0.266769874 | 0.442060471 |
| 238795_at   | -0.02869827 | -0.79178205 | 0.431683052 | 0.612527509 |
| 238796_at   | 0.061972449 | 1.551689095 | 0.126124163 | 0.259388124 |
| 238797_at   | -0.06634433 | -1.74378316 | 0.08644401  | 0.194940073 |
| 238798_at   | 0.036601802 | 1.202736608 | 0.23391817  | 0.402753432 |
| 238799_at   | 0.00794759  | 0.396479778 | 0.693192082 | 0.818000701 |
| 238800_s_at | 0.014714425 | 0.495072823 | 0.622401061 | 0.768040826 |
| 238801_at   | 0.015562683 | 0.439537435 | 0.661889793 | 0.795773338 |
| 238802_at   | 0.004703904 | 0.12632356  | 0.899908489 | 0.946433938 |
| 238803_at   | -0.10965769 | -3.23374387 | 0.002009358 | 0.009144831 |
| 238804_at   | -0.11539183 | -2.29974519 | 0.025045143 | 0.07382874  |
| 238805_at   | 0.084662575 | 2.163113806 | 0.034625996 | 0.095471961 |
| 238806_at   | -0.00454999 | -0.15263237 | 0.879212835 | 0.935187663 |
| 238807_at   | 0.232588676 | 3.807368465 | 0.000338545 | 0.002058837 |
| 238808_at   | 0.072320724 | 2.012488008 | 0.048774347 | 0.125068742 |
| 238809_at   | -0.00045553 | -0.01262047 | 0.989973481 | 0.995318429 |
| 238810_at   | 0.129586616 | 2.193471009 | 0.032256005 | 0.090290064 |
| 238811_at   | 0.055090291 | 1.884853013 | 0.064414474 | 0.155510569 |
| 238812_at   | 0.072218871 | 2.373475232 | 0.020921829 | 0.063881832 |
| 238813_at   | 0.024146745 | 0.76998798  | 0.444401801 | 0.624585845 |
| 238814_at   | 0.041996282 | 1.267295318 | 0.210065731 | 0.374705952 |
| 238815_at   | -0.7092097  | -8.49301478 | 8.53E-12    | 5.15E-09    |
| 238816_at   | -0.07384567 | -1.45840276 | 0.15007182  | 0.29431003  |
| 238817_at   | -0.08014178 | -2.33164883 | 0.023179642 | 0.069414672 |
| 238818_at   | -0.11688257 | -2.96901011 | 0.00432395  | 0.017504166 |
| 238819_at   | 0.102289594 | 2.467808253 | 0.016535995 | 0.052701041 |
| 238820_at   | -0.04530887 | -1.29142601 | 0.201629763 | 0.363869872 |
| 238821_at   | -0.05056472 | -1.44663929 | 0.153329119 | 0.298926053 |
| 238822_at   | -0.02545525 | -1.13950313 | 0.259132517 | 0.43318311  |
| 238823_at   | 0.106652681 | 2.744268504 | 0.008037632 | 0.029213548 |
| 238824_at   | 0.214428992 | 3.446611337 | 0.001056724 | 0.005333987 |
| 238825_at   | -0.02726567 | -0.40633787 | 0.685975353 | 0.812462747 |
| 238826_x_at | -0.13092534 | -3.37478083 | 0.001315942 | 0.006421233 |
| 238827_at   | -0.20288568 | -4.40246563 | 4.60E-05    | 0.000384181 |
| 238828_at   | -0.05250716 | -1.34937988 | 0.182408457 | 0.339268261 |
| 238829_at   | -0.03556381 | -0.98388285 | 0.32922035  | 0.511614308 |
| 238830_at   | -0.00853894 | -0.2831314  | 0.778074491 | 0.87274634  |
| 238831_at   | -0.00714367 | -0.08959953 | 0.928911169 | 0.962932247 |
| 238832_at   | -0.02306157 | -0.6212911  | 0.536818914 | 0.703047938 |
| 238833_at   | 0.072382066 | 2.313992932 | 0.024196152 | 0.07186167  |
| 238834_at   | 0.328847231 | 2.874804524 | 0.005627008 | 0.021711323 |
| 238835_at   | -0.01792257 | -0.8096389  | 0.421425106 | 0.60337329  |
| 238836_at   | 0.011597134 | 0.26287343  | 0.793570698 | 0.882464833 |
| 238837_at   | -0.05838757 | -1.39829035 | 0.167298725 | 0.318790594 |
| 238838_at   | -0.01309654 | -0.56666974 | 0.57310396  | 0.731157038 |
| 238839_at   | -0.02128498 | -0.64900308 | 0.518873406 | 0.688319688 |
| 238840_at   | 0.013992523 | 0.321219041 | 0.749187939 | 0.855371334 |
| 238841_at   | -0.24729703 | -3.48308649 | 0.000944421 | 0.004861558 |
| 238842_at   | -0.00373434 | -0.14307716 | 0.886720371 | 0.939238898 |
| 238843_at   | 0.017652469 | 0.745514561 | 0.458942394 | 0.637484179 |
| 238844_s_at | 0.089764916 | 1.29955674  | 0.198845133 | 0.360284873 |
| 238845_at   | 0.038076381 | 1.246918919 | 0.217390991 | 0.383623082 |

|             |             |             |             |             |
|-------------|-------------|-------------|-------------|-------------|
| 238846_at   | -0.0968156  | -2.57503658 | 0.012569913 | 0.042044223 |
| 238847_at   | -0.03383137 | -0.78759797 | 0.434107908 | 0.614855506 |
| 238848_at   | -0.13517432 | -3.54204338 | 0.000786524 | 0.004172759 |
| 238849_at   | -0.02073903 | -0.45349095 | 0.65187115  | 0.788989179 |
| 238850_at   | 0.055611903 | 0.458711494 | 0.648139172 | 0.786480497 |
| 238851_at   | -0.05393475 | -0.70243645 | 0.485189624 | 0.660054021 |
| 238852_at   | 0.278883576 | 3.188085399 | 0.00229942  | 0.010246853 |
| 238853_at   | -0.00159716 | -0.02386938 | 0.981037938 | 0.990456718 |
| 238854_at   | 0.239813954 | 4.229313496 | 8.34E-05    | 0.00063227  |
| 238855_at   | 0.017193385 | 0.50937501  | 0.612403372 | 0.760932971 |
| 238856_s_at | -0.09611432 | -1.61511783 | 0.111660277 | 0.236593493 |
| 238857_at   | -0.05973116 | -1.44977822 | 0.152454601 | 0.297610773 |
| 238858_at   | -0.01812707 | -0.6300146  | 0.531135462 | 0.69828517  |
| 238859_at   | 0.029289268 | 1.004929745 | 0.319064725 | 0.500513888 |
| 238860_at   | 0.245980476 | 5.965283349 | 1.51E-07    | 3.47E-06    |
| 238861_at   | -0.26183371 | -5.41821116 | 1.19E-06    | 1.83E-05    |
| 238862_at   | -0.1332067  | -2.66153083 | 0.010023396 | 0.034972722 |
| 238863_x_at | 0.193726552 | 4.866858261 | 8.93E-06    | 9.73E-05    |
| 238864_at   | 0.162885364 | 2.62480855  | 0.011040766 | 0.037770507 |
| 238865_at   | 0.014379809 | 0.45811186  | 0.64856737  | 0.78686573  |
| 238866_at   | -0.03097818 | -0.5861795  | 0.560007358 | 0.72153397  |
| 238867_at   | 0.002227549 | 0.060104707 | 0.952276872 | 0.975510568 |
| 238868_at   | 0.082439917 | 2.246731068 | 0.028440983 | 0.081610556 |
| 238869_at   | 0.048079643 | 1.163454494 | 0.249363441 | 0.421804593 |
| 238870_at   | -0.01369072 | -0.44643068 | 0.656932527 | 0.792347074 |
| 238871_at   | 0.056695344 | 1.229840201 | 0.223674518 | 0.390853099 |
| 238872_at   | -0.0727216  | -2.0791019  | 0.041996644 | 0.111158662 |
| 238873_at   | 0.021140397 | 0.731357185 | 0.467477231 | 0.644690727 |
| 238874_at   | -0.01243322 | -0.40530753 | 0.686728265 | 0.812991963 |
| 238875_at   | 0.27788159  | 3.106681725 | 0.002916374 | 0.012528944 |
| 238876_at   | -0.0043649  | -0.11628319 | 0.907825931 | 0.951157083 |
| 238877_at   | 0.201596784 | 2.441432522 | 0.017670348 | 0.055704535 |
| 238878_at   | -0.04693455 | -0.78984828 | 0.432802755 | 0.61368764  |
| 238879_at   | 0.085585611 | 1.669587501 | 0.100338248 | 0.218108802 |
| 238880_at   | 0.287649715 | 4.200430835 | 9.20E-05    | 0.000686302 |
| 238881_at   | -0.01185189 | -0.38031211 | 0.705089596 | 0.826215632 |
| 238882_at   | -0.01270477 | -0.40298504 | 0.688426576 | 0.814376934 |
| 238883_at   | 0.392430023 | 6.647190832 | 1.10E-08    | 4.79E-07    |
| 238884_at   | 0.320677151 | 5.471636901 | 9.72E-07    | 1.56E-05    |
| 238885_at   | -0.1091956  | -3.29271391 | 0.001685509 | 0.007899409 |
| 238886_at   | 0.324212526 | 6.097356785 | 9.12E-08    | 2.35E-06    |
| 238887_at   | -0.03787551 | -1.2181072  | 0.228067833 | 0.395580961 |
| 238888_at   | 0.031929154 | 1.010524285 | 0.316400985 | 0.497592822 |
| 238889_at   | 0.017538507 | 0.595304514 | 0.553933361 | 0.716372179 |
| 238890_at   | -0.2444094  | -3.33476605 | 0.001485363 | 0.007105197 |
| 238891_at   | -0.02916171 | -1.23786662 | 0.220705069 | 0.387613094 |
| 238892_at   | 0.106978271 | 2.636452409 | 0.01070842  | 0.036839404 |
| 238893_at   | -0.50922539 | -5.39008659 | 1.32E-06    | 1.99E-05    |
| 238894_at   | -0.0312443  | -0.84560459 | 0.401214964 | 0.58352368  |
| 238895_at   | 0.074578851 | 1.516169419 | 0.13485579  | 0.27243874  |
| 238896_at   | -0.02393557 | -0.76821105 | 0.44544838  | 0.625643589 |
| 238897_at   | -0.05202148 | -1.97870502 | 0.052558085 | 0.132632746 |
| 238898_at   | 0.031235396 | 0.810831743 | 0.420745136 | 0.602709754 |
| 238899_at   | -0.06815998 | -1.67062904 | 0.100131253 | 0.217796562 |
| 238900_at   | 0.006569156 | 0.136483452 | 0.891907187 | 0.942120445 |
| 238901_at   | -0.01857906 | -0.54249525 | 0.589535847 | 0.743939049 |
| 238902_at   | 0.002502479 | 0.036492059 | 0.97101411  | 0.985267245 |
| 238903_at   | -0.03160311 | -1.18969313 | 0.238967712 | 0.408709652 |
| 238904_at   | -0.08402789 | -3.12294192 | 0.002781934 | 0.012055676 |
| 238905_at   | 0.112898828 | 3.002029053 | 0.003937967 | 0.016187972 |
| 238906_s_at | 0.051509895 | 0.909821608 | 0.366645836 | 0.549778081 |
| 238907_at   | -0.08093924 | -1.93652657 | 0.057632993 | 0.142494674 |
| 238908_at   | 0.003016344 | 0.127355898 | 0.899094993 | 0.946023624 |
| 238909_at   | -0.02237132 | -0.5276042  | 0.599767291 | 0.75142408  |
| 238910_at   | -0.06306139 | -1.95309639 | 0.055591514 | 0.138643747 |
| 238911_at   | 0.020405994 | 0.599465803 | 0.551174455 | 0.71387842  |
| 238912_x_at | 0.008893209 | 0.212496906 | 0.832457263 | 0.907347381 |
| 238913_at   | 0.07379678  | 1.966078664 | 0.054035513 | 0.13559546  |
| 238914_at   | -0.58277956 | -6.85239711 | 4.97E-09    | 2.77E-07    |
| 238915_at   | -0.13421945 | -3.02002907 | 0.003741313 | 0.015497892 |
| 238916_at   | -0.07144677 | -1.03417797 | 0.305304547 | 0.485302793 |
| 238917_s_at | -0.05803501 | -1.83767097 | 0.071185031 | 0.167777736 |
| 238918_at   | -0.06096443 | -1.28800222 | 0.202811043 | 0.36547844  |
| 238919_at   | 0.332208414 | 3.043324403 | 0.003500386 | 0.014639022 |
| 238920_at   | 0.126208417 | 3.401298492 | 0.001213925 | 0.005992789 |

|             |             |             |             |             |
|-------------|-------------|-------------|-------------|-------------|
| 238921_at   | -0.01891198 | -0.42711797 | 0.670859591 | 0.801759378 |
| 238922_at   | 0.005524366 | 0.2296324   | 0.819177534 | 0.899238139 |
| 238923_at   | 0.073637054 | 2.118595399 | 0.038377135 | 0.103453219 |
| 238924_at   | -0.00962479 | -0.24670121 | 0.80600216  | 0.89079204  |
| 238925_at   | 0.022422766 | 0.742845892 | 0.46054433  | 0.638994356 |
| 238926_at   | -0.03406835 | -0.84691215 | 0.400491623 | 0.582851008 |
| 238927_at   | -0.02583968 | -0.70012912 | 0.486618627 | 0.661130592 |
| 238928_at   | -0.04690643 | -1.25507964 | 0.214434918 | 0.38010254  |
| 238929_at   | 0.014968772 | 0.340293268 | 0.734853245 | 0.84563847  |
| 238930_at   | 0.013926372 | 0.381850974 | 0.703953923 | 0.82546923  |
| 238931_at   | 0.063103187 | 1.589738893 | 0.11727789  | 0.245452067 |
| 238932_at   | 0.016023982 | 0.176928429 | 0.860175057 | 0.923745086 |
| 238933_at   | 0.010486072 | 0.27900732  | 0.781222077 | 0.874989828 |
| 238934_at   | -0.08095842 | -2.14171284 | 0.036387188 | 0.099250301 |
| 238935_at   | -0.07977598 | -2.14424659 | 0.036174665 | 0.098821401 |
| 238936_at   | -0.06671058 | -2.10723902 | 0.039388989 | 0.105566051 |
| 238937_at   | 0.069950896 | 1.253777804 | 0.214904482 | 0.38064803  |
| 238938_at   | -0.02738561 | -1.0297129  | 0.307378681 | 0.487676809 |
| 238939_at   | 0.115714926 | 2.9917378   | 0.004054685 | 0.016577113 |
| 238940_at   | 0.022612854 | 0.715957895 | 0.476862391 | 0.652559293 |
| 238941_at   | -0.03362333 | -1.12275658 | 0.266122588 | 0.441335512 |
| 238942_at   | -0.04495708 | -1.3044446  | 0.197185061 | 0.358148205 |
| 238943_at   | 0.036749755 | 0.966174453 | 0.33792976  | 0.52076506  |
| 238944_at   | 0.100607183 | 1.546491296 | 0.127372969 | 0.261198161 |
| 238945_at   | -0.06637217 | -1.49490249 | 0.140308937 | 0.280467261 |
| 238946_at   | -0.10695106 | -3.12494149 | 0.002765808 | 0.011999134 |
| 238947_at   | -0.04353666 | -0.7691969  | 0.444867556 | 0.625063531 |
| 238948_at   | 0.011506469 | 0.37891597  | 0.706120522 | 0.826778492 |
| 238949_at   | -0.04568212 | -0.57666853 | 0.566373313 | 0.726594027 |
| 238950_at   | -0.01541264 | -0.53591345 | 0.594047937 | 0.747194076 |
| 238951_at   | 0.207383886 | 3.516535112 | 0.000851483 | 0.004454982 |
| 238952_x_at | -0.07313082 | -2.32988624 | 0.023279384 | 0.069662785 |
| 238953_at   | -0.01084419 | -0.24575318 | 0.8067325   | 0.891246574 |
| 238954_at   | -0.01337839 | -0.39001069 | 0.697943467 | 0.821203392 |
| 238955_at   | 0.058148516 | 0.848417196 | 0.399660034 | 0.58196293  |
| 238956_at   | -0.21369575 | -4.4969758  | 3.32E-05    | 0.000291765 |
| 238957_at   | -0.00980095 | -0.37175976 | 0.711413407 | 0.830421867 |
| 238958_at   | 0.003112563 | 0.111376165 | 0.911698887 | 0.953248331 |
| 238959_at   | -0.03173695 | -0.92806701 | 0.357181983 | 0.540314022 |
| 238960_s_at | -0.06734086 | -1.50356495 | 0.13806711  | 0.277139092 |
| 238961_s_at | 0.049441391 | 1.257293902 | 0.213637993 | 0.379095894 |
| 238962_at   | 0.026547076 | 0.893838675 | 0.375066707 | 0.558209773 |
| 238963_at   | -0.12818824 | -2.75833067 | 0.007738467 | 0.02829019  |
| 238964_at   | 0.562123662 | 6.684957946 | 9.50E-09    | 4.31E-07    |
| 238965_at   | -0.03161962 | -0.67997602 | 0.499198744 | 0.672030838 |
| 238966_at   | -0.68140114 | -5.18921373 | 2.77E-06    | 3.69E-05    |
| 238967_at   | 0.03804042  | 1.099984775 | 0.275839656 | 0.452330884 |
| 238968_at   | -0.03668103 | -0.96586731 | 0.338082147 | 0.520899483 |
| 238969_at   | -0.01055639 | -0.30275991 | 0.763145592 | 0.863740036 |
| 238970_at   | 0.021471968 | 0.36057697  | 0.719712987 | 0.835838525 |
| 238971_at   | -0.0057673  | -0.16327953 | 0.870860478 | 0.930243612 |
| 238972_at   | -0.01469046 | -0.59389166 | 0.554871649 | 0.717170564 |
| 238973_s_at | 0.0848903   | 2.826290452 | 0.006431782 | 0.024269215 |
| 238974_at   | -0.15666082 | -2.4751855  | 0.016230679 | 0.051924231 |
| 238975_at   | -0.04046825 | -1.12735817 | 0.264188732 | 0.439024423 |
| 238976_at   | -0.01007943 | -0.28152224 | 0.7793022   | 0.873806174 |
| 238977_at   | -0.04174075 | -1.49515821 | 0.140242348 | 0.280384317 |
| 238978_at   | 0.012697932 | 0.394102903 | 0.694936413 | 0.819258723 |
| 238979_at   | -0.1155004  | -3.13180515 | 0.002711119 | 0.011800824 |
| 238980_x_at | -0.01143471 | -0.38124006 | 0.704404695 | 0.825694511 |
| 238981_at   | -0.09295983 | -2.80854513 | 0.006751779 | 0.025274352 |
| 238982_at   | 0.074183598 | 2.14439905  | 0.036161912 | 0.098792601 |
| 238983_at   | 0.221424525 | 3.035197675 | 0.003582741 | 0.014924025 |
| 238984_at   | -0.03605103 | -1.26301445 | 0.211589286 | 0.376596908 |
| 238985_at   | -0.18787506 | -3.90081239 | 0.00024976  | 0.001592565 |
| 238986_at   | -0.01940696 | -0.70678529 | 0.482502595 | 0.657559492 |
| 238987_at   | 0.05170704  | 1.24180235  | 0.219259645 | 0.386102622 |
| 238988_at   | 0.156109205 | 3.677714793 | 0.000513117 | 0.002929136 |
| 238989_at   | 0.073008403 | 1.830544885 | 0.072257902 | 0.169733532 |
| 238990_x_at | 0.018014733 | 0.424525716 | 0.672737953 | 0.803109347 |
| 238991_at   | 0.006899899 | 0.151756783 | 0.879900329 | 0.935584924 |
| 238992_at   | 0.074270626 | 2.143916666 | 0.036202276 | 0.098878697 |
| 238993_at   | 0.025686021 | 0.756067523 | 0.45263918  | 0.631952728 |
| 238994_at   | 0.270091449 | 4.479413227 | 3.53E-05    | 0.000308231 |
| 238995_at   | -0.00821831 | -0.23516769 | 0.814898917 | 0.896358867 |

|             |             |             |             |             |
|-------------|-------------|-------------|-------------|-------------|
| 238996_x_at | -0.20905585 | -3.42631432 | 0.00112459  | 0.005616289 |
| 238997_at   | -0.03786479 | -1.20123848 | 0.234494168 | 0.4033317   |
| 238998_x_at | 0.071068602 | 2.094678458 | 0.040535118 | 0.108006648 |
| 238999_at   | -0.02960816 | -0.48605605 | 0.628741156 | 0.772975268 |
| 239000_at   | -0.00212584 | -0.05725724 | 0.954535187 | 0.976618516 |
| 239001_at   | 0.32742236  | 3.047224773 | 0.003461491 | 0.014513645 |
| 239002_at   | -0.11649831 | -3.04307572 | 0.00350288  | 0.014647333 |
| 239003_at   | -0.00786818 | -0.25826884 | 0.79710489  | 0.884897703 |
| 239004_at   | -0.01433909 | -0.40910411 | 0.683955531 | 0.81101737  |
| 239005_at   | 0.384107195 | 5.584748144 | 6.36E-07    | 1.10E-05    |
| 239006_at   | 0.00857576  | 0.379816913 | 0.705455192 | 0.826384028 |
| 239007_at   | 0.00426681  | 0.195103859 | 0.845986921 | 0.915410595 |
| 239008_at   | -0.0379278  | -1.43868421 | 0.155562957 | 0.302041359 |
| 239009_at   | -0.03690475 | -0.95420099 | 0.343903858 | 0.5267291   |
| 239010_at   | -0.02249982 | -1.03127536 | 0.306651792 | 0.486834638 |
| 239011_at   | -0.12990273 | -1.91044715 | 0.060975467 | 0.148913419 |
| 239012_at   | -0.03370109 | -0.85314663 | 0.3970538   | 0.579432765 |
| 239013_at   | 0.099479604 | 2.401718463 | 0.019510536 | 0.06040332  |
| 239014_at   | 0.122588896 | 2.30319774  | 0.024837019 | 0.073336157 |
| 239015_at   | 0.000402503 | 0.013736348 | 0.989087012 | 0.9949255   |
| 239016_at   | 0.007725233 | 0.20165381  | 0.84088616  | 0.912511783 |
| 239017_at   | 0.247406552 | 2.268178911 | 0.027020942 | 0.078299938 |
| 239018_at   | 0.056743462 | 1.653924808 | 0.103493438 | 0.223409641 |
| 239019_at   | 0.003791821 | 0.132669594 | 0.894909468 | 0.9437972   |
| 239020_at   | 0.031358122 | 0.937767852 | 0.352215009 | 0.535518825 |
| 239021_at   | 0.032114384 | 0.962900971 | 0.339556216 | 0.522390582 |
| 239022_at   | 0.12770613  | 2.417329996 | 0.018767595 | 0.058507351 |
| 239023_at   | 0.075078113 | 2.384290473 | 0.020370957 | 0.062511592 |
| 239024_at   | -0.25529043 | -4.06014604 | 0.000147481 | 0.001020471 |
| 239025_at   | 0.04280707  | 0.888473494 | 0.377920714 | 0.560423139 |
| 239026_x_at | -0.14653918 | -3.60753079 | 0.000640664 | 0.003528786 |
| 239027_at   | -0.01821195 | -0.46972963 | 0.6402925   | 0.781367515 |
| 239028_at   | 0.019448456 | 0.611014675 | 0.543554127 | 0.708112897 |
| 239029_at   | 0.16253741  | 4.193426229 | 9.42E-05    | 0.000699866 |
| 239030_at   | -0.03897486 | -1.12424845 | 0.265494528 | 0.440653673 |
| 239031_at   | -0.07874143 | -2.2754926  | 0.026551265 | 0.077289724 |
| 239032_at   | 0.047649852 | 1.311316125 | 0.194868902 | 0.355071543 |
| 239033_at   | 0.442479132 | 6.87235763  | 4.60E-09    | 2.61E-07    |
| 239034_at   | 0.136960574 | 3.352079474 | 0.001409672 | 0.006805777 |
| 239035_at   | 0.009194357 | 0.238805646 | 0.812089957 | 0.894533911 |
| 239036_at   | -0.06321097 | -1.78143502 | 0.080026673 | 0.183761602 |
| 239037_at   | -0.03947588 | -1.20655449 | 0.232454927 | 0.400975553 |
| 239038_at   | -0.24060308 | -3.73688186 | 0.00042481  | 0.002493839 |
| 239039_at   | 0.002256939 | 0.07175875  | 0.943038395 | 0.970597884 |
| 239040_at   | 0.031997111 | 1.079641831 | 0.284727946 | 0.462326019 |
| 239041_at   | -0.01870458 | -0.65624831 | 0.514234544 | 0.684788006 |
| 239042_at   | 0.01450027  | 0.386685283 | 0.700390647 | 0.822931851 |
| 239043_at   | 0.279495624 | 3.441799791 | 0.001072452 | 0.005399348 |
| 239044_at   | -0.01881836 | -0.59133988 | 0.55656832  | 0.718774024 |
| 239045_at   | -0.06681735 | -1.89184005 | 0.063459725 | 0.153653809 |
| 239046_at   | -0.00431854 | -0.14533952 | 0.884941865 | 0.938422633 |
| 239047_at   | 0.011308106 | 0.273442053 | 0.785475431 | 0.87763364  |
| 239048_at   | 0.023520943 | 0.614397622 | 0.541332173 | 0.706584984 |
| 239049_at   | 0.238953932 | 3.601157818 | 0.000653638 | 0.003585662 |
| 239050_s_at | -0.00200416 | -0.03347712 | 0.973407945 | 0.986540185 |
| 239051_at   | 0.068739501 | 2.092468804 | 0.040739717 | 0.108487126 |
| 239052_at   | -0.00821596 | -0.19016836 | 0.849834822 | 0.91761054  |
| 239053_at   | -0.13878877 | -3.24852276 | 0.001923098 | 0.008817802 |
| 239054_at   | -0.04516415 | -1.5360501  | 0.129911343 | 0.265089843 |
| 239055_at   | -0.01396006 | -0.44720013 | 0.656380132 | 0.792108356 |
| 239056_at   | -0.0127381  | -0.45074038 | 0.653841043 | 0.790175059 |
| 239057_at   | -0.04567344 | -1.10021263 | 0.275741212 | 0.452202637 |
| 239058_at   | 0.018234715 | 0.444573497 | 0.658266604 | 0.793313857 |
| 239059_at   | 0.02253516  | 0.556469945 | 0.580009764 | 0.736527922 |
| 239060_at   | -0.04732359 | -1.40831982 | 0.164322978 | 0.314564849 |
| 239061_at   | -0.00718711 | -0.2215938  | 0.825400945 | 0.903135218 |
| 239062_at   | 0.087522972 | 2.147590942 | 0.035895813 | 0.098209714 |
| 239063_at   | 0.037849957 | 1.080626624 | 0.284293141 | 0.461737436 |
| 239064_at   | -0.17172447 | -3.47136758 | 0.000979204 | 0.005009063 |
| 239065_at   | 0.008623352 | 0.308424131 | 0.758854007 | 0.861205587 |
| 239066_at   | 0.35829347  | 5.472840704 | 9.67E-07    | 1.55E-05    |
| 239067_s_at | -0.18989161 | -4.41177393 | 4.46E-05    | 0.000373884 |
| 239068_at   | -0.29466056 | -4.60601007 | 2.26E-05    | 0.000211803 |
| 239069_s_at | -0.1547981  | -2.11819437 | 0.038412477 | 0.103529757 |
| 239070_at   | 0.11293445  | 3.245817466 | 0.001938623 | 0.008878055 |



|             |             |             |             |             |
|-------------|-------------|-------------|-------------|-------------|
| 239071_at   | 0.19375214  | 4.034169369 | 0.000160817 | 0.001096285 |
| 239072_at   | -0.0237989  | -1.00500945 | 0.319026671 | 0.500471761 |
| 239073_at   | -0.03093909 | -1.08873863 | 0.280729069 | 0.457895751 |
| 239074_at   | 0.02332213  | 0.635309466 | 0.527701132 | 0.695574793 |
| 239075_at   | -0.05988175 | -2.21204725 | 0.030877122 | 0.08708122  |
| 239076_at   | 0.06988509  | 1.936574391 | 0.057627011 | 0.142487767 |
| 239077_at   | -0.02913603 | -0.78060448 | 0.438178926 | 0.61864137  |
| 239078_at   | 0.040124852 | 1.357763091 | 0.179747379 | 0.335726759 |
| 239079_at   | -0.04179691 | -0.93943447 | 0.351366213 | 0.534597221 |
| 239080_at   | -0.09790341 | -4.3181163  | 6.16E-05    | 0.000489546 |
| 239081_at   | 0.13841019  | 3.039606549 | 0.00353784  | 0.014765891 |
| 239082_at   | -0.17960887 | -2.70942422 | 0.008825248 | 0.03151562  |
| 239083_at   | -0.02428126 | -0.64650762 | 0.520476284 | 0.689473139 |
| 239084_at   | 0.12751429  | 1.595403107 | 0.116004779 | 0.243391653 |
| 239085_at   | 0.027943226 | 0.805226768 | 0.42394594  | 0.605509314 |
| 239086_at   | 0.048685225 | 1.187987569 | 0.239633779 | 0.409487338 |
| 239087_at   | -0.08933205 | -2.43985885 | 0.017740189 | 0.055869532 |
| 239088_at   | -0.09004809 | -3.44714744 | 0.001054985 | 0.005328219 |
| 239089_at   | 0.024475309 | 0.850299639 | 0.398621419 | 0.580942688 |
| 239090_at   | 0.043963729 | 1.945897046 | 0.05647079  | 0.140327636 |
| 239091_at   | 0.135558347 | 2.830667518 | 0.006355033 | 0.024026659 |
| 239092_at   | -0.01308218 | -0.49707975 | 0.62099378  | 0.767274584 |
| 239093_at   | 0.227250522 | 4.354551773 | 5.43E-05    | 0.000441735 |
| 239094_at   | -0.0576611  | -1.42258619 | 0.160160813 | 0.308530477 |
| 239095_at   | -0.40490776 | -5.60188869 | 5.97E-07    | 1.05E-05    |
| 239096_at   | 0.144345912 | 2.881540225 | 0.005522947 | 0.021380257 |
| 239097_at   | -0.00751069 | -0.22419498 | 0.823385883 | 0.901864125 |
| 239098_at   | 0.03652386  | 1.05652979  | 0.295064977 | 0.473944938 |
| 239099_at   | -0.01142144 | -0.33603845 | 0.738042842 | 0.847977035 |
| 239100_x_at | -0.11151852 | -2.67074255 | 0.009781996 | 0.034283011 |
| 239101_at   | -0.02719725 | -0.76290801 | 0.448580337 | 0.628068685 |
| 239102_s_at | 0.1628837   | 2.74101854  | 0.008108268 | 0.029408757 |
| 239103_at   | 0.017948919 | 0.4895843   | 0.626256904 | 0.77105908  |
| 239104_at   | -0.01435472 | -0.32174411 | 0.748792123 | 0.855111808 |
| 239105_at   | -0.1292938  | -4.18042055 | 9.84E-05    | 0.000727376 |
| 239106_at   | 0.051114125 | 0.741360314 | 0.461437474 | 0.639677521 |
| 239107_at   | 0.064908038 | 1.759003252 | 0.083800319 | 0.190188264 |
| 239108_at   | -0.75133835 | -7.11320228 | 1.80E-09    | 1.35E-07    |
| 239109_at   | 0.003434186 | 0.119733143 | 0.905104331 | 0.94975283  |
| 239110_s_at | -0.05869219 | -1.23510305 | 0.221724185 | 0.388691351 |
| 239111_at   | 0.003256338 | 0.085124507 | 0.93245274  | 0.964969616 |
| 239112_at   | -0.0074546  | -0.17616809 | 0.860769642 | 0.92420438  |
| 239113_at   | 0.057603634 | 1.648775258 | 0.104548298 | 0.225233673 |
| 239114_at   | -0.03671186 | -1.10288299 | 0.274589333 | 0.450892695 |
| 239115_at   | -0.00903886 | -0.2597649  | 0.795956136 | 0.884152975 |
| 239116_at   | -0.03245848 | -1.16790114 | 0.247579222 | 0.419518885 |
| 239117_at   | -0.01459986 | -0.45533117 | 0.650554613 | 0.788270978 |
| 239118_at   | -0.44913669 | -4.86524055 | 8.99E-06    | 9.78E-05    |
| 239119_at   | -0.0590841  | -1.53607026 | 0.129906404 | 0.265089843 |
| 239120_at   | 0.086349073 | 2.768298936 | 0.007532633 | 0.027662157 |
| 239121_at   | 0.180736976 | 4.110456335 | 0.000124624 | 0.000888877 |
| 239122_at   | -0.0282702  | -0.75316463 | 0.454368041 | 0.63353753  |
| 239123_at   | -0.06512496 | -2.05894984 | 0.04395519  | 0.115304848 |
| 239124_at   | 0.017936922 | 0.563488633 | 0.57525344  | 0.732748867 |
| 239125_at   | 0.010317059 | 0.186819139 | 0.852448098 | 0.919044663 |
| 239126_at   | -0.04227909 | -1.30962679 | 0.195436412 | 0.355884906 |
| 239127_at   | 0.06281389  | 2.097864725 | 0.040241665 | 0.107384791 |
| 239128_at   | 0.065905737 | 2.180950836 | 0.033215619 | 0.092395668 |
| 239129_at   | 0.060922071 | 1.921260349 | 0.059570107 | 0.146168179 |
| 239130_at   | 0.049821596 | 0.854830268 | 0.396128544 | 0.578762852 |
| 239131_at   | 0.075417111 | 1.622850232 | 0.109992656 | 0.233918239 |
| 239132_at   | -0.49448116 | -5.06394512 | 4.37E-06    | 5.41E-05    |
| 239133_at   | 0.090394549 | 1.915369104 | 0.060332319 | 0.147718964 |
| 239134_at   | -0.05990637 | -1.78665073 | 0.079169838 | 0.182120562 |
| 239135_at   | 0.15141561  | 2.286798725 | 0.025839426 | 0.075680951 |
| 239136_at   | -0.06474115 | -1.51996186 | 0.133901241 | 0.270977388 |
| 239137_x_at | 0.006644875 | 0.229770461 | 0.81907075  | 0.899187176 |
| 239138_at   | 0.004461154 | 0.162187081 | 0.871716807 | 0.930774862 |
| 239139_at   | 0.01938879  | 0.401859225 | 0.689250405 | 0.814917684 |
| 239140_at   | 0.007913469 | 0.377167192 | 0.707412621 | 0.827643747 |
| 239141_at   | -0.00630098 | -0.19075938 | 0.849373843 | 0.917312256 |
| 239142_at   | -0.07167803 | -2.00224911 | 0.049895546 | 0.127242896 |
| 239143_x_at | -0.023647   | -0.94373258 | 0.349183351 | 0.532290823 |
| 239144_at   | 0.517253856 | 5.093537881 | 3.93E-06    | 4.94E-05    |
| 239145_at   | -0.15134547 | -2.6973819  | 0.009113493 | 0.032376805 |

|             |             |             |             |             |
|-------------|-------------|-------------|-------------|-------------|
| 239146_at   | -0.02777887 | -0.84912564 | 0.399268965 | 0.581582966 |
| 239147_at   | 0.148372844 | 3.318747688 | 0.001558799 | 0.007398666 |
| 239148_at   | -0.03131718 | -0.99476069 | 0.323944991 | 0.505967343 |
| 239149_at   | 0.087039901 | 2.680210293 | 0.009539435 | 0.033572441 |
| 239150_at   | 0.046716983 | 0.808578235 | 0.422030282 | 0.604027969 |
| 239151_at   | 0.170514176 | 2.250132523 | 0.028211466 | 0.081050838 |
| 239152_at   | -0.02625902 | -0.82014026 | 0.415461641 | 0.59765069  |
| 239153_at   | 0.054457577 | 2.210663868 | 0.03097799  | 0.08733163  |
| 239154_at   | 0.189260776 | 3.513536789 | 0.000859445 | 0.004490333 |
| 239155_at   | -0.07798039 | -2.11123144 | 0.039030646 | 0.104797696 |
| 239156_at   | -0.01713908 | -0.47502389 | 0.636536693 | 0.778440221 |
| 239157_at   | -0.06896511 | -1.46757304 | 0.147570323 | 0.290871168 |
| 239158_at   | 0.016817769 | 0.55133012  | 0.5835048   | 0.739256053 |
| 239159_at   | 0.054015935 | 1.446462973 | 0.153378357 | 0.298957022 |
| 239160_at   | 0.090146455 | 3.129347911 | 0.00273058  | 0.011867654 |
| 239161_at   | -0.00958352 | -0.25322791 | 0.800978882 | 0.887544894 |
| 239162_at   | -0.21394035 | -3.11163554 | 0.002874785 | 0.012381217 |
| 239163_at   | 0.328985228 | 4.242457253 | 7.98E-05    | 0.000609532 |
| 239164_at   | 0.008554605 | 0.218535979 | 0.827771268 | 0.904419762 |
| 239165_at   | -0.01945513 | -0.60952992 | 0.544530799 | 0.708951277 |
| 239166_at   | 0.157924345 | 4.023918002 | 0.000166394 | 0.001127683 |
| 239167_at   | 0.251116046 | 5.743869589 | 3.50E-07    | 6.77E-06    |
| 239168_at   | 0.012726155 | 0.549836755 | 0.584522159 | 0.740104381 |
| 239169_at   | -0.00313193 | -0.0888921  | 0.929470946 | 0.963261543 |
| 239170_at   | -0.06704174 | -1.92808646 | 0.058697204 | 0.144415027 |
| 239171_at   | 0.235151017 | 4.844111013 | 9.69E-06    | 0.000104076 |
| 239172_x_at | 0.02396029  | 0.80210167  | 0.425736899 | 0.60723283  |
| 239173_at   | -0.07000406 | -1.86140716 | 0.067707573 | 0.161661868 |
| 239174_at   | 0.289507076 | 2.263344809 | 0.027335407 | 0.079006274 |
| 239175_at   | 0.171521997 | 3.944815369 | 0.000216162 | 0.001407445 |
| 239176_at   | -3.48E-05   | -0.00102916 | 0.999182348 | 0.999562563 |
| 239177_at   | -0.04232704 | -0.99874421 | 0.322027333 | 0.503976102 |
| 239178_at   | -0.16566733 | -4.69405655 | 1.66E-05    | 0.000162798 |
| 239179_at   | 0.541801251 | 7.146179504 | 1.59E-09    | 1.26E-07    |
| 239180_at   | -0.05182187 | -1.5556488  | 0.125179395 | 0.257847515 |
| 239181_at   | -0.0469581  | -1.47424627 | 0.145770614 | 0.288226354 |
| 239182_at   | -0.03132669 | -1.01648774 | 0.313578121 | 0.494685259 |
| 239183_at   | -0.00886907 | -0.29241722 | 0.771001094 | 0.868890257 |
| 239184_at   | -0.08220773 | -1.91624616 | 0.060218322 | 0.147459168 |
| 239185_at   | 0.02799973  | 0.730776778 | 0.467829047 | 0.644956992 |
| 239186_at   | -0.04137225 | -1.12323959 | 0.265919135 | 0.441150216 |
| 239187_at   | -0.01613047 | -0.55218614 | 0.582922015 | 0.73868523  |
| 239188_at   | 0.131955605 | 4.416055938 | 4.39E-05    | 0.000369166 |
| 239189_at   | 0.012047783 | 0.314271833 | 0.754431388 | 0.858792379 |
| 239190_at   | -0.02517259 | -0.5630232  | 0.575568262 | 0.732982753 |
| 239191_at   | 0.034764232 | 1.173552619 | 0.245324813 | 0.416683929 |
| 239192_at   | 0.003435347 | 0.090555682 | 0.928154649 | 0.962438227 |
| 239193_at   | -0.02214854 | -0.50522041 | 0.615300066 | 0.763311787 |
| 239194_at   | -0.03866662 | -1.15589508 | 0.252417783 | 0.425405831 |
| 239195_at   | -0.06011334 | -1.64380639 | 0.105574433 | 0.226785964 |
| 239196_at   | -0.06067053 | -1.70491577 | 0.093509855 | 0.206857518 |
| 239197_s_at | -0.02528105 | -0.9038626  | 0.369771202 | 0.552972677 |
| 239198_at   | -0.05047659 | -1.16365585 | 0.249282447 | 0.421733395 |
| 239199_at   | 0.039763942 | 1.175517452 | 0.244544502 | 0.415653109 |
| 239200_at   | -0.00145194 | -0.04806205 | 0.961830314 | 0.980634662 |
| 239201_at   | -0.05919044 | -1.80848459 | 0.075665637 | 0.175852764 |
| 239202_at   | -0.12998247 | -2.46474178 | 0.01666442  | 0.053034828 |
| 239203_at   | 0.108813012 | 2.820799848 | 0.006529266 | 0.024568994 |
| 239204_at   | -0.00944524 | -0.32308895 | 0.747778633 | 0.854538891 |
| 239205_s_at | -0.11145558 | -1.88084286 | 0.064967918 | 0.156533839 |
| 239206_at   | -0.00024799 | -0.00794095 | 0.993691093 | 0.997149389 |
| 239207_at   | -0.14117015 | -4.68990286 | 1.68E-05    | 0.000164673 |
| 239208_s_at | -0.00265067 | -0.04001384 | 0.968218189 | 0.983870474 |
| 239209_at   | -0.14569357 | -3.91741009 | 0.000236536 | 0.00152192  |
| 239210_at   | 0.037633237 | 1.477701195 | 0.14484565  | 0.286905189 |
| 239211_at   | -0.0311432  | -0.73108454 | 0.467642476 | 0.644801067 |
| 239212_at   | 0.118644677 | 1.906017127 | 0.061559306 | 0.150052278 |
| 239213_at   | 0.02228427  | 0.64372384  | 0.522267432 | 0.691156532 |
| 239214_at   | -0.0310814  | -1.09910458 | 0.276220172 | 0.452622714 |
| 239215_at   | -0.06050729 | -1.79372672 | 0.078019642 | 0.180044426 |
| 239216_at   | 0.403706236 | 3.470860282 | 0.000980737 | 0.005015573 |
| 239217_x_at | 0.022906152 | 0.695804115 | 0.489303519 | 0.6636708   |
| 239218_at   | 0.314147444 | 3.011201992 | 0.003836578 | 0.015835274 |
| 239219_at   | -0.00501026 | -0.15538677 | 0.877050736 | 0.934132921 |
| 239220_at   | 0.048858839 | 1.374164141 | 0.174626947 | 0.328732046 |

|             |             |             |             |             |
|-------------|-------------|-------------|-------------|-------------|
| 239221_at   | 0.100083066 | 2.509588358 | 0.014872928 | 0.048243643 |
| 239222_at   | 0.042077398 | 1.50519994  | 0.137647172 | 0.27657359  |
| 239223_s_at | -0.07744608 | -1.83769335 | 0.071181684 | 0.167777736 |
| 239224_at   | -0.11201759 | -3.15035407 | 0.002568349 | 0.011255602 |
| 239225_at   | 0.082284904 | 2.902871496 | 0.005205033 | 0.020359124 |
| 239226_at   | 0.053155991 | 1.361002793 | 0.178726968 | 0.334311522 |
| 239227_at   | 0.053272165 | 1.35354298  | 0.181083244 | 0.337488421 |
| 239228_at   | 0.233187127 | 3.963703811 | 0.000203115 | 0.001333328 |
| 239229_at   | 0.197724942 | 3.243737623 | 0.001950639 | 0.00892211  |
| 239230_at   | -0.12862204 | -2.24157011 | 0.028792376 | 0.08240195  |
| 239231_at   | -0.06395215 | -1.69499324 | 0.09538797  | 0.209962527 |
| 239232_at   | 0.352014415 | 4.311436349 | 6.30E-05    | 0.000499118 |
| 239233_at   | 0.140915283 | 3.649028559 | 0.000562005 | 0.003161374 |
| 239234_at   | -0.00124099 | -0.04167718 | 0.966897807 | 0.98322177  |
| 239235_at   | -0.01907334 | -0.65385655 | 0.515763449 | 0.685883896 |
| 239236_at   | -0.00082331 | -0.02514413 | 0.980025478 | 0.989993641 |
| 239237_at   | 0.006244048 | 0.185810115 | 0.85323573  | 0.919571989 |
| 239238_at   | 0.098826317 | 2.407241081 | 0.019244759 | 0.0597656   |
| 239239_at   | -0.03188546 | -0.98146351 | 0.330401361 | 0.512950207 |
| 239240_at   | 0.102774778 | 2.269266605 | 0.026950629 | 0.078141788 |
| 239241_at   | 0.064925968 | 2.011861499 | 0.048842323 | 0.125185589 |
| 239242_at   | 0.002977547 | 0.079079492 | 0.937238979 | 0.967374871 |
| 239243_at   | 0.438548482 | 3.54769856  | 0.000772775 | 0.004117416 |
| 239244_at   | -0.02056813 | -0.47239386 | 0.63840127  | 0.780016118 |
| 239245_at   | 0.072593117 | 1.887119849 | 0.064103396 | 0.154968841 |
| 239246_at   | 0.276748004 | 5.36781355  | 1.43E-06    | 2.14E-05    |
| 239247_at   | 0.161015477 | 3.066374189 | 0.003276314 | 0.013834566 |
| 239248_at   | 0.046872873 | 1.130345662 | 0.262938549 | 0.437581442 |
| 239249_at   | 0.015807969 | 0.424712753 | 0.672602355 | 0.803002619 |
| 239250_at   | 0.117996967 | 3.271876785 | 0.001793864 | 0.008323594 |
| 239251_at   | 0.228014382 | 2.709118203 | 0.008832468 | 0.031538884 |
| 239252_at   | -0.44101841 | -4.60147936 | 2.30E-05    | 0.000214492 |
| 239253_at   | -0.04423651 | -1.6088964  | 0.113016837 | 0.238635003 |
| 239254_at   | 0.020555855 | 0.56599853  | 0.573557171 | 0.731547291 |
| 239255_at   | 0.011730667 | 0.406429301 | 0.685908556 | 0.812451968 |
| 239256_at   | -0.07262631 | -2.13408269 | 0.037033786 | 0.10061483  |
| 239257_at   | -0.04017195 | -1.39672812 | 0.167765956 | 0.319449368 |
| 239258_at   | 0.300303216 | 3.441099425 | 0.001074759 | 0.005407311 |
| 239259_at   | 0.025008424 | 0.67809631  | 0.500381081 | 0.672916417 |
| 239260_at   | -0.00634075 | -0.22433501 | 0.823277442 | 0.901778449 |
| 239261_s_at | 0.001406052 | 0.034966286 | 0.972225528 | 0.985902689 |
| 239262_at   | -0.07307876 | -2.01330617 | 0.048685698 | 0.12488205  |
| 239263_at   | 0.053015634 | 1.826144004 | 0.072927238 | 0.170910547 |
| 239264_at   | 0.147085501 | 3.575825859 | 0.000707727 | 0.003827412 |
| 239265_at   | -0.0931961  | -2.48852761 | 0.015691378 | 0.050469886 |
| 239266_at   | 0.182099598 | 4.665676495 | 1.83E-05    | 0.000177228 |
| 239267_at   | -0.05454515 | -1.67432715 | 0.099399114 | 0.216646925 |
| 239268_at   | 0.091091261 | 3.123622537 | 0.002776435 | 0.012037644 |
| 239269_at   | 0.14030639  | 2.919462359 | 0.004969586 | 0.019623673 |
| 239270_at   | 0.105290083 | 1.476692857 | 0.145115128 | 0.287298897 |
| 239271_at   | -0.00331523 | -0.11514178 | 0.908726612 | 0.951699155 |
| 239272_at   | 0.064857923 | 1.431579368 | 0.157579389 | 0.304932708 |
| 239273_s_at | -0.01676485 | -0.39145514 | 0.696881497 | 0.820599353 |
| 239274_at   | 0.411775156 | 4.466497272 | 3.69E-05    | 0.000319809 |
| 239275_at   | 0.244384108 | 3.544360656 | 0.000780862 | 0.004150607 |
| 239276_at   | 0.044637035 | 1.217094247 | 0.228450061 | 0.395973033 |
| 239277_at   | 0.093253754 | 1.684591212 | 0.097389998 | 0.213276842 |
| 239278_at   | -0.4590047  | -6.87526838 | 4.54E-09    | 2.60E-07    |
| 239279_at   | -0.006546   | -0.25644472 | 0.798506157 | 0.885892313 |
| 239280_at   | 0.06485129  | 1.621608402 | 0.110259109 | 0.23437337  |
| 239281_at   | -0.02167431 | -0.5797494  | 0.564307304 | 0.724800023 |
| 239282_at   | -0.03040791 | -0.92216805 | 0.360224357 | 0.543412778 |
| 239283_at   | 0.067769571 | 1.95405206  | 0.05547568  | 0.138416654 |
| 239284_at   | -0.09712148 | -2.36192393 | 0.021524862 | 0.06537917  |
| 239285_at   | 0.205437312 | 2.927032914 | 0.004865465 | 0.019292641 |
| 239286_at   | -0.08892998 | -1.98856242 | 0.05142886  | 0.130349834 |
| 239287_at   | -0.01482184 | -0.32313785 | 0.747741791 | 0.854529269 |
| 239288_at   | -0.0261355  | -0.55657896 | 0.579935742 | 0.736508999 |
| 239289_x_at | 0.030344165 | 0.971839969 | 0.335126952 | 0.517893974 |
| 239290_at   | -0.49552206 | -7.22723547 | 1.16E-09    | 1.04E-07    |
| 239291_at   | 0.569125702 | 4.566791264 | 2.60E-05    | 0.000238199 |
| 239292_at   | -0.07900554 | -2.74463803 | 0.008029637 | 0.029192266 |
| 239293_at   | -0.69128802 | -6.45541037 | 2.31E-08    | 8.19E-07    |
| 239294_at   | 0.124069911 | 2.684888437 | 0.009421624 | 0.03326331  |
| 239295_at   | -0.17297268 | -3.88460625 | 0.000263357 | 0.001664541 |

|             |             |             |             |             |
|-------------|-------------|-------------|-------------|-------------|
| 239296_at   | 0.681238926 | 6.753796639 | 7.28E-09    | 3.58E-07    |
| 239297_at   | -0.24323322 | -3.33267079 | 0.00149478  | 0.007143359 |
| 239298_at   | -0.01844311 | -0.51051384 | 0.61161043  | 0.760336394 |
| 239299_at   | -0.01168148 | -0.33427414 | 0.739366807 | 0.848899322 |
| 239300_at   | -0.20301061 | -3.87657697 | 0.000270355 | 0.001700592 |
| 239301_at   | 0.547091552 | 5.618416467 | 5.61E-07    | 9.92E-06    |
| 239302_s_at | -0.11643532 | -1.19163263 | 0.238211918 | 0.407728398 |
| 239303_at   | -0.04010861 | -1.02786598 | 0.308239411 | 0.488695441 |
| 239304_at   | -0.04832759 | -1.23202347 | 0.222863911 | 0.389982836 |
| 239305_at   | -0.00363192 | -0.12917307 | 0.897663301 | 0.945162519 |
| 239306_at   | -0.01437208 | -0.46528587 | 0.643452266 | 0.783403309 |
| 239307_at   | 0.125633703 | 2.154723189 | 0.035307401 | 0.09689643  |
| 239308_at   | 0.014991929 | 0.50941     | 0.612379002 | 0.760932032 |
| 239309_at   | -0.60207197 | -8.65916347 | 4.50E-12    | 4.01E-09    |
| 239310_at   | -0.01261386 | -0.42206853 | 0.674520377 | 0.804442138 |
| 239311_at   | 0.118946578 | 3.546211153 | 0.000776369 | 0.004133114 |
| 239312_at   | 0.063874109 | 2.116511965 | 0.038561054 | 0.103817507 |
| 239313_at   | 0.036756013 | 0.476685334 | 0.635360009 | 0.777660884 |
| 239314_at   | -0.03403402 | -1.05194364 | 0.297146461 | 0.476175898 |
| 239315_at   | -0.02134077 | -0.55889593 | 0.578363616 | 0.735243677 |
| 239316_at   | 0.054461063 | 1.648298232 | 0.104646456 | 0.225369094 |
| 239317_at   | -0.02421219 | -0.89242596 | 0.375816873 | 0.558649202 |
| 239318_at   | -0.05330898 | -1.35549017 | 0.180465928 | 0.336709984 |
| 239319_at   | -0.06457522 | -2.07605485 | 0.042287833 | 0.111790362 |
| 239320_at   | -0.50433327 | -4.37627147 | 5.04E-05    | 0.000414465 |
| 239321_at   | -0.0210307  | -0.74829269 | 0.457278162 | 0.63612775  |
| 239322_at   | -0.06232307 | -1.39297225 | 0.168893369 | 0.320953416 |
| 239323_at   | -0.02775968 | -0.8557864  | 0.395603692 | 0.578260677 |
| 239324_at   | 0.052720509 | 1.657115832 | 0.102844138 | 0.222312464 |
| 239325_at   | 0.035234482 | 1.000839122 | 0.321021904 | 0.502878057 |
| 239326_at   | 0.049798052 | 1.579032767 | 0.119714954 | 0.249059711 |
| 239327_at   | 0.000153696 | 0.005374223 | 0.995730275 | 0.997950293 |
| 239328_at   | 0.038884204 | 0.952470591 | 0.344772921 | 0.527659763 |
| 239329_at   | 0.068169554 | 1.527686801 | 0.131973475 | 0.268134679 |
| 239330_at   | -0.21181909 | -6.50913536 | 1.87E-08    | 7.04E-07    |
| 239331_at   | 0.331311286 | 3.499273787 | 0.000898301 | 0.004662817 |
| 239332_at   | -0.00839351 | -0.32998478 | 0.742588905 | 0.850843258 |
| 239333_x_at | 0.135638586 | 3.227172025 | 0.002048874 | 0.0092925   |
| 239334_at   | -0.06359717 | -1.2503434  | 0.216146893 | 0.382167066 |
| 239335_at   | 0.02090523  | 0.638487695 | 0.525645276 | 0.694048058 |
| 239336_at   | -0.04708966 | -1.55035987 | 0.126442584 | 0.259802857 |
| 239337_at   | -0.02156916 | -0.75493824 | 0.453311287 | 0.632611649 |
| 239338_x_at | 0.051738577 | 1.693466937 | 0.095679597 | 0.210428253 |
| 239339_at   | 0.136634225 | 2.429146158 | 0.018222256 | 0.057142091 |
| 239340_at   | 0.218959036 | 2.440894241 | 0.01769421  | 0.055765101 |
| 239341_at   | -0.03590242 | -0.99828381 | 0.32224858  | 0.504110523 |
| 239342_at   | -0.24358131 | -5.6472373  | 5.03E-07    | 9.10E-06    |
| 239343_at   | -0.07903571 | -2.67150819 | 0.009762173 | 0.034224273 |
| 239344_at   | 0.008363208 | 0.255501742 | 0.799230799 | 0.886267099 |
| 239345_at   | 0.044648098 | 1.405772928 | 0.16507474  | 0.315588838 |
| 239346_at   | 0.11775558  | 1.784395902 | 0.079539316 | 0.182820979 |
| 239347_at   | 0.03384785  | 1.052581088 | 0.296856546 | 0.475864876 |
| 239348_at   | 0.259511212 | 4.06487718  | 0.00014517  | 0.001006661 |
| 239349_at   | 0.044515901 | 1.54855873  | 0.126875077 | 0.260487915 |
| 239350_at   | 0.093016071 | 2.312151809 | 0.024304401 | 0.072120861 |
| 239351_at   | -0.10325541 | -3.17981212 | 0.00235602  | 0.010458406 |
| 239352_at   | -0.14054808 | -2.56756816 | 0.012815281 | 0.042694038 |
| 239353_at   | 0.087174438 | 1.93529813  | 0.057786857 | 0.14281189  |
| 239354_at   | -0.22834075 | -5.14382903 | 3.27E-06    | 4.24E-05    |
| 239355_at   | 0.066519437 | 1.419186443 | 0.161145182 | 0.309945794 |
| 239356_at   | -0.02964954 | -0.71223878 | 0.479144789 | 0.65456026  |
| 239357_at   | -0.75447284 | -6.53945339 | 1.67E-08    | 6.48E-07    |
| 239358_at   | -0.04954993 | -1.03717023 | 0.303919913 | 0.483734775 |
| 239359_at   | -0.13897851 | -3.56533222 | 0.00073136  | 0.003937591 |
| 239360_at   | 0.028212545 | 0.676525015 | 0.501370594 | 0.673667506 |
| 239361_at   | 0.106062138 | 1.58395175  | 0.118590225 | 0.247446201 |
| 239362_at   | -0.0003798  | -0.01063198 | 0.991553204 | 0.996077588 |
| 239363_at   | 0.159457745 | 4.170354927 | 0.000101857 | 0.00074884  |
| 239364_at   | -0.06393195 | -2.4359857  | 0.01791314  | 0.056358611 |
| 239365_at   | 0.01946829  | 0.803092074 | 0.425168819 | 0.606558077 |
| 239366_at   | -0.04483602 | -1.25681691 | 0.213809478 | 0.379309828 |
| 239367_at   | 0.098046124 | 1.961957    | 0.05452543  | 0.136565926 |
| 239368_at   | -0.04437932 | -0.84258218 | 0.402890025 | 0.585198121 |
| 239369_at   | 0.009782658 | 0.308784046 | 0.758581567 | 0.86112413  |
| 239370_at   | -0.03390682 | -1.20006219 | 0.234947151 | 0.40385608  |

|             |             |             |             |             |
|-------------|-------------|-------------|-------------|-------------|
| 239371_at   | -0.06214017 | -1.50187105 | 0.138503248 | 0.277870605 |
| 239372_at   | -0.06441387 | -2.14990123 | 0.035704281 | 0.097758518 |
| 239373_at   | -0.01940898 | -0.53857901 | 0.59221864  | 0.745792652 |
| 239374_at   | 0.043479907 | 1.233763694 | 0.222219342 | 0.389238755 |
| 239375_at   | -0.03996099 | -1.18628673 | 0.240299335 | 0.410257894 |
| 239376_at   | 0.124765747 | 2.638441259 | 0.010652574 | 0.036681164 |
| 239377_at   | 0.224357195 | 4.492318149 | 3.37E-05    | 0.00029608  |
| 239378_at   | 0.077065248 | 2.219420778 | 0.030344353 | 0.085881187 |
| 239379_at   | 0.001367067 | 0.036869261 | 0.970714633 | 0.985214037 |
| 239380_at   | 0.073319976 | 1.940759783 | 0.057105453 | 0.141574135 |
| 239381_at   | -0.0457545  | -1.32336752 | 0.19085631  | 0.349823656 |
| 239382_at   | -0.01241788 | -0.37203348 | 0.711210692 | 0.830362271 |
| 239383_at   | 0.108727352 | 2.88322062  | 0.005497265 | 0.021297138 |
| 239384_at   | -0.05251523 | -1.37058716 | 0.175734056 | 0.330331739 |
| 239385_at   | 0.020593205 | 0.329205834 | 0.743174534 | 0.85115282  |
| 239386_at   | 0.011957839 | 0.400414978 | 0.690307803 | 0.815650488 |
| 239387_at   | 0.042142541 | 1.877187053 | 0.065475958 | 0.157528613 |
| 239388_at   | -0.15755921 | -4.81603896 | 1.07E-05    | 0.00011296  |
| 239389_at   | 0.011694094 | 0.369095532 | 0.71338759  | 0.831740309 |
| 239390_at   | 0.224827987 | 4.3391893   | 5.73E-05    | 0.000462018 |
| 239391_at   | 0.048653696 | 1.39585645  | 0.16802709  | 0.31977106  |
| 239392_s_at | 0.454175723 | 6.279519359 | 4.54E-08    | 1.36E-06    |
| 239393_at   | 0.178254764 | 3.01612632  | 0.003783158 | 0.015648023 |
| 239394_at   | -0.00561635 | -0.16659521 | 0.868262405 | 0.928616176 |
| 239395_at   | -3.38E-05   | -0.00080476 | 0.999360632 | 0.99965141  |
| 239396_at   | 0.025501399 | 0.747092697 | 0.457996587 | 0.636663866 |
| 239397_at   | 0.121594918 | 2.473985768 | 0.016279983 | 0.05201866  |
| 239398_at   | -0.01352254 | -0.41924689 | 0.676569489 | 0.805896685 |
| 239399_at   | 0.045181171 | 1.587444194 | 0.117796847 | 0.246295985 |
| 239400_at   | 0.054777609 | 1.693516206 | 0.095670172 | 0.210426748 |
| 239401_at   | 0.071702237 | 2.481758725 | 0.015962929 | 0.051213247 |
| 239402_at   | 0.007738402 | 0.213103731 | 0.831986121 | 0.907148838 |
| 239403_at   | 0.008661494 | 0.264826373 | 0.79207305  | 0.881540191 |
| 239404_at   | 0.14477955  | 3.848476791 | 0.000296279 | 0.001843164 |
| 239405_at   | 0.114053411 | 2.817245294 | 0.0065931   | 0.024775821 |
| 239406_at   | -0.01501655 | -0.45877847 | 0.648091353 | 0.786466225 |
| 239407_at   | 0.21146338  | 3.496545265 | 0.000905922 | 0.004694197 |
| 239408_at   | 0.014135273 | 0.494152531 | 0.623046855 | 0.768503162 |
| 239409_at   | 0.322728824 | 6.076549967 | 9.88E-08    | 2.50E-06    |
| 239410_at   | 0.011553344 | 0.413087174 | 0.681051287 | 0.809186338 |
| 239411_at   | 0.04952945  | 1.591923478 | 0.116785547 | 0.244616379 |
| 239412_at   | 0.110632136 | 1.985199969 | 0.051811686 | 0.131126785 |
| 239413_at   | 0.101928516 | 2.790435629 | 0.007093418 | 0.026334861 |
| 239414_at   | 0.052531631 | 1.842469834 | 0.07047011  | 0.166473908 |
| 239415_at   | -0.07583306 | -1.7936123  | 0.07803813  | 0.180052755 |
| 239416_at   | -0.02066387 | -0.46551594 | 0.643288515 | 0.783345301 |
| 239417_x_at | 0.068707578 | 1.772199745 | 0.081562797 | 0.186445938 |
| 239418_x_at | 0.093407679 | 3.607433735 | 0.00064086  | 0.003528994 |
| 239419_at   | 0.00988626  | 0.395593949 | 0.693841976 | 0.818465057 |
| 239420_at   | -0.03601381 | -0.89312972 | 0.375443048 | 0.558410125 |
| 239421_at   | 0.100339042 | 2.591585381 | 0.012041352 | 0.040606061 |
| 239422_at   | 0.071394482 | 1.770292789 | 0.081883024 | 0.186853005 |
| 239423_at   | -0.15629529 | -3.99439989 | 0.000183515 | 0.001226687 |
| 239424_at   | -0.0316425  | -0.97521589 | 0.333464162 | 0.516110034 |
| 239425_at   | -0.14613306 | -2.33130335 | 0.023199162 | 0.069463818 |
| 239426_at   | 0.052823709 | 0.780028515 | 0.438515205 | 0.618979266 |
| 239427_at   | 0.000534665 | 0.014159011 | 0.988751245 | 0.994786881 |
| 239428_at   | -0.00691252 | -0.19579662 | 0.845447118 | 0.91518297  |
| 239429_at   | 0.017253121 | 0.626125273 | 0.533665527 | 0.700464523 |
| 239430_at   | -0.02850916 | -0.79378552 | 0.430524807 | 0.611388728 |
| 239431_at   | -0.00180793 | -0.04940382 | 0.960765584 | 0.98006335  |
| 239432_at   | -0.10958433 | -1.42500574 | 0.159463095 | 0.307605405 |
| 239433_at   | 0.027663893 | 0.863044367 | 0.391633615 | 0.574432196 |
| 239434_at   | 0.03607679  | 0.808292165 | 0.422193593 | 0.604145621 |
| 239435_x_at | 0.306599977 | 6.85807797  | 4.86E-09    | 2.73E-07    |
| 239436_at   | 0.014159271 | 0.267348176 | 0.790140327 | 0.880523835 |
| 239437_at   | -0.08496053 | -1.64695963 | 0.104922302 | 0.225789076 |
| 239438_at   | 0.013694962 | 0.524767199 | 0.601725871 | 0.752928092 |
| 239439_at   | -0.00499634 | -0.09222138 | 0.92683688  | 0.961651898 |
| 239440_at   | -0.08791464 | -2.66962295 | 0.009811049 | 0.034368665 |
| 239441_at   | -0.06329707 | -2.07857247 | 0.042047113 | 0.111279065 |
| 239442_at   | 0.076415941 | 1.61462246  | 0.111767806 | 0.236702212 |
| 239443_at   | -0.08473949 | -2.09462556 | 0.040540005 | 0.10801323  |
| 239444_at   | -0.02359346 | -0.83371166 | 0.407830967 | 0.590075632 |
| 239445_at   | 0.105740228 | 3.258572483 | 0.001866446 | 0.008612826 |

|             |             |             |             |             |
|-------------|-------------|-------------|-------------|-------------|
| 239446_x_at | 0.028248881 | 0.501219796 | 0.618095222 | 0.765459756 |
| 239447_at   | 0.008192813 | 0.277546269 | 0.782338067 | 0.875610075 |
| 239448_at   | -0.11346492 | -1.95763753 | 0.055042931 | 0.137544237 |
| 239449_at   | 0.30303404  | 4.45216282  | 3.88E-05    | 0.000333827 |
| 239450_at   | -0.08143572 | -1.74107954 | 0.086920773 | 0.19577982  |
| 239451_at   | 0.013652162 | 0.205124454 | 0.838186163 | 0.910598863 |
| 239452_at   | -0.02300115 | -0.69610855 | 0.489114266 | 0.663494651 |
| 239453_at   | 0.236595486 | 3.417293579 | 0.00115606  | 0.005749683 |
| 239454_at   | 0.088703786 | 1.421460215 | 0.160486312 | 0.309010996 |
| 239455_at   | 0.017483788 | 0.457007591 | 0.649356239 | 0.787459409 |
| 239456_at   | -0.0452881  | -1.2658825  | 0.210567649 | 0.375316637 |
| 239457_at   | -0.01060555 | -0.32222099 | 0.748432688 | 0.854930684 |
| 239458_at   | 0.026505894 | 0.564018423 | 0.574895188 | 0.732480422 |
| 239459_s_at | 0.054248217 | 1.250036128 | 0.216258309 | 0.382273321 |
| 239460_at   | 0.025728717 | 0.864943867 | 0.390598706 | 0.573429051 |
| 239461_at   | 0.490863319 | 5.047323413 | 4.65E-06    | 5.68E-05    |
| 239462_at   | -0.10422386 | -3.5163983  | 0.000851844 | 0.004456353 |
| 239463_at   | 0.005298344 | 0.187981796 | 0.851540729 | 0.918571751 |
| 239464_at   | 0.00310134  | 0.103925316 | 0.91758369  | 0.956336146 |
| 239465_at   | -0.05546745 | -1.54909664 | 0.126745788 | 0.260246383 |
| 239466_at   | 0.03638632  | 0.669863271 | 0.505577567 | 0.677214825 |
| 239467_at   | 0.000339765 | 0.013519829 | 0.989259017 | 0.9949255   |
| 239468_at   | 0.130272501 | 2.443712857 | 0.017569583 | 0.055454007 |
| 239469_at   | 0.071522489 | 1.499988599 | 0.138989207 | 0.278501868 |
| 239470_at   | -0.00040527 | -0.00898795 | 0.992859296 | 0.996856236 |
| 239471_at   | -0.03058837 | -1.28954662 | 0.202277554 | 0.364773775 |
| 239472_at   | 0.059798887 | 2.536061903 | 0.013898939 | 0.045623601 |
| 239473_x_at | 0.084783652 | 2.154963296 | 0.03528774  | 0.096866265 |
| 239474_at   | -0.06281721 | -2.25016233 | 0.028209462 | 0.081050291 |
| 239475_at   | -0.03962419 | -1.14595972 | 0.256472663 | 0.430043719 |
| 239476_at   | 0.117751698 | 2.659617062 | 0.010074225 | 0.035106219 |
| 239477_at   | 0.417381172 | 2.844127334 | 0.006124288 | 0.023304103 |
| 239478_x_at | 0.00526125  | 0.223193502 | 0.824161562 | 0.902337788 |
| 239479_x_at | -0.04100979 | -1.70059113 | 0.09432464  | 0.2082785   |
| 239480_at   | 0.009411582 | 0.363188462 | 0.717771725 | 0.834751201 |
| 239481_at   | -0.11825368 | -1.65539189 | 0.103194506 | 0.222871895 |
| 239482_x_at | 0.238731207 | 2.297006792 | 0.025211316 | 0.074215791 |
| 239483_at   | -0.02099693 | -0.52287805 | 0.60303172  | 0.753886644 |
| 239484_at   | -0.05810514 | -1.53506634 | 0.130152569 | 0.265436644 |
| 239485_at   | -0.00821964 | -0.18006593 | 0.857722411 | 0.922383359 |
| 239486_at   | -0.00040033 | -0.01424834 | 0.988680278 | 0.99477912  |
| 239487_at   | 0.091275425 | 1.038908656 | 0.303117445 | 0.482861312 |
| 239488_at   | 0.020437981 | 0.452756165 | 0.652397141 | 0.789265909 |
| 239489_at   | 0.087275277 | 2.478514456 | 0.016094577 | 0.05155525  |
| 239490_at   | 0.014408421 | 0.4326031   | 0.666891995 | 0.799498825 |
| 239491_at   | -0.07018477 | -1.10298642 | 0.274544786 | 0.450852676 |
| 239492_at   | 0.04253591  | 1.577949297 | 0.119963838 | 0.249441981 |
| 239493_at   | -0.02525118 | -0.42058541 | 0.675597135 | 0.805146186 |
| 239494_at   | -0.01900305 | -0.74329151 | 0.460276614 | 0.638765108 |
| 239495_at   | 0.047301333 | 1.332843211 | 0.187745373 | 0.345823525 |
| 239496_at   | 0.070957421 | 2.633444836 | 0.010793379 | 0.037066058 |
| 239497_at   | 0.117408399 | 3.019943782 | 0.003742223 | 0.015500224 |
| 239498_at   | -0.04946329 | -1.17553313 | 0.244538284 | 0.415653109 |
| 239499_at   | 0.030410896 | 0.543482715 | 0.588860304 | 0.743385817 |
| 239500_at   | 0.143525455 | 1.736083803 | 0.087807464 | 0.197339394 |
| 239501_at   | -0.01819068 | -0.9010825  | 0.371235093 | 0.55448788  |
| 239502_at   | -0.03177334 | -0.9610796  | 0.340463404 | 0.523336899 |
| 239503_at   | 0.137684278 | 2.237538651 | 0.029069526 | 0.083056852 |
| 239504_at   | 0.240463351 | 5.347125082 | 1.54E-06    | 2.28E-05    |
| 239505_at   | -0.01794219 | -0.6866743  | 0.494997929 | 0.668356196 |
| 239506_s_at | 0.025092035 | 0.809956683 | 0.421243891 | 0.603214157 |
| 239507_at   | -0.00920694 | -0.2433402  | 0.808592187 | 0.892374605 |
| 239508_x_at | 0.058652003 | 1.464444329 | 0.148420082 | 0.292082356 |
| 239509_at   | 0.015052155 | 0.304103494 | 0.762126922 | 0.863127128 |
| 239510_at   | 0.021596539 | 0.572555651 | 0.569137169 | 0.728070711 |
| 239511_s_at | 0.012076133 | 0.413856886 | 0.68049061  | 0.808627661 |
| 239512_at   | 0.01182878  | 0.173009287 | 0.863240671 | 0.925763535 |
| 239513_at   | -0.06261881 | -1.75320678 | 0.084799127 | 0.192064784 |
| 239514_at   | -0.03293643 | -1.03794595 | 0.303561658 | 0.483371134 |
| 239515_at   | 0.223740614 | 3.198472201 | 0.002230169 | 0.009994057 |
| 239516_at   | 0.152170471 | 3.087366522 | 0.003083973 | 0.013149104 |
| 239517_at   | 0.025574807 | 0.599732507 | 0.550997869 | 0.713732046 |
| 239518_at   | -0.04901053 | -1.52855682 | 0.131757749 | 0.267747406 |
| 239519_at   | 0.046304079 | 1.413902448 | 0.162684417 | 0.312140641 |
| 239520_at   | -0.00622457 | -0.25686666 | 0.798181965 | 0.885697398 |

|             |             |             |             |             |
|-------------|-------------|-------------|-------------|-------------|
| 239521_at   | 0.055929545 | 1.719758591 | 0.090757337 | 0.202174084 |
| 239522_at   | 0.004861356 | 0.115345673 | 0.908565711 | 0.951623751 |
| 239523_at   | -0.00309033 | -0.07449648 | 0.940869213 | 0.96917586  |
| 239524_at   | 0.116097272 | 3.834177979 | 0.000310371 | 0.001915102 |
| 239525_at   | 0.029227622 | 0.808794071 | 0.421907092 | 0.603893462 |
| 239526_x_at | -0.01457898 | -0.46713129 | 0.642139263 | 0.782529529 |
| 239527_at   | 0.036294179 | 1.598991461 | 0.115204028 | 0.242120781 |
| 239528_at   | 0.072800623 | 1.710460392 | 0.092473702 | 0.205134    |
| 239529_at   | -0.05071229 | -1.35432455 | 0.18083527  | 0.337209075 |
| 239530_at   | -0.03369817 | -0.79531566 | 0.429641447 | 0.6105805   |
| 239531_at   | 0.004604773 | 0.113607921 | 0.909937162 | 0.952475914 |
| 239532_at   | -0.04804149 | -1.41290748 | 0.162975522 | 0.312457725 |
| 239533_at   | -0.50377634 | -3.76482375 | 0.000388354 | 0.002313559 |
| 239534_at   | -0.01781207 | -0.40117589 | 0.689750627 | 0.815235662 |
| 239535_at   | -0.02398948 | -0.62199873 | 0.536356715 | 0.702586738 |
| 239536_at   | 0.003999413 | 0.093930649 | 0.925484863 | 0.960911888 |
| 239537_at   | -0.02486589 | -0.60579162 | 0.546993804 | 0.710688036 |
| 239538_at   | -0.10751996 | -2.94866205 | 0.004579039 | 0.018355583 |
| 239539_at   | 0.278271162 | 4.697503229 | 1.64E-05    | 0.000161386 |
| 239540_at   | -0.02752936 | -0.92240913 | 0.360099697 | 0.543278048 |
| 239541_at   | -0.02911817 | -1.09976439 | 0.275934896 | 0.452386311 |
| 239542_at   | -0.01721226 | -0.43174738 | 0.667510343 | 0.79975262  |
| 239543_s_at | 0.002047904 | 0.058707973 | 0.953384568 | 0.976080838 |
| 239544_at   | -0.05818127 | -1.62817958 | 0.108855087 | 0.232095394 |
| 239545_at   | 0.232717784 | 4.439951054 | 4.04E-05    | 0.00034534  |
| 239546_at   | -0.03680179 | -1.37628847 | 0.173971979 | 0.327897699 |
| 239547_at   | -0.0384604  | -1.11918284 | 0.267631363 | 0.44290087  |
| 239548_at   | -0.13063566 | -4.24195955 | 7.99E-05    | 0.000610436 |
| 239549_at   | -0.00855663 | -0.24137828 | 0.810105054 | 0.893352366 |
| 239550_at   | -0.04239865 | -1.14704549 | 0.256027286 | 0.429470085 |
| 239551_at   | 0.018851959 | 0.480529751 | 0.63264091  | 0.775841383 |
| 239552_at   | -0.0663521  | -2.3494886  | 0.02219135  | 0.067002824 |
| 239553_at   | -0.05892298 | -1.473618   | 0.145939315 | 0.288470581 |
| 239554_at   | 0.062709282 | 1.242774963 | 0.218903523 | 0.385636424 |
| 239555_at   | 0.043947803 | 1.368808219 | 0.176286648 | 0.330978108 |
| 239556_at   | -0.37531194 | -5.00496912 | 5.42E-06    | 6.44E-05    |
| 239557_at   | 0.178877082 | 3.187746135 | 0.002301716 | 0.010256606 |
| 239558_at   | -0.0712785  | -2.72302971 | 0.008509653 | 0.030616    |
| 239559_at   | 0.003829496 | 0.079017837 | 0.937287807 | 0.967374871 |
| 239560_at   | 0.009602627 | 0.199201966 | 0.842794739 | 0.913604147 |
| 239561_at   | 0.321154862 | 6.102908445 | 8.93E-08    | 2.31E-06    |
| 239562_at   | -0.09159598 | -2.30119562 | 0.024957522 | 0.073628266 |
| 239563_at   | -0.01815304 | -0.61680668 | 0.539752721 | 0.705484415 |
| 239564_at   | -0.02627207 | -0.81172399 | 0.420236949 | 0.602275271 |
| 239565_at   | -0.06711951 | -2.05406939 | 0.044441246 | 0.116354316 |
| 239566_at   | -0.02941698 | -0.78445415 | 0.435935197 | 0.616544805 |
| 239567_at   | 0.02784698  | 0.905369098 | 0.368979476 | 0.552239736 |
| 239568_at   | 0.153659107 | 2.919061446 | 0.004975157 | 0.019642201 |
| 239569_at   | -0.01656989 | -0.4416816  | 0.660346174 | 0.79472711  |
| 239570_at   | -0.03760802 | -1.11173621 | 0.270794559 | 0.446564718 |
| 239571_at   | 0.120358156 | 2.354557184 | 0.021917501 | 0.066353721 |
| 239572_at   | -0.05243007 | -1.99115942 | 0.051134847 | 0.129737076 |
| 239573_at   | -0.0468695  | -1.05328744 | 0.296535521 | 0.475566292 |
| 239574_at   | 0.002095709 | 0.05651172  | 0.955126518 | 0.976897527 |
| 239575_at   | -0.06084511 | -0.37843074 | 0.706478951 | 0.826976357 |
| 239576_at   | 0.570229955 | 6.125099257 | 8.20E-08    | 2.16E-06    |
| 239577_at   | -0.21783247 | -3.05571669 | 0.003378199 | 0.014200383 |
| 239578_at   | 0.025146045 | 0.95464748  | 0.343679852 | 0.526523377 |
| 239579_at   | -0.90089894 | -7.51616863 | 3.76E-10    | 4.86E-08    |
| 239580_at   | -0.5427154  | -6.64515575 | 1.11E-08    | 4.82E-07    |
| 239581_at   | -0.01929684 | -0.47128747 | 0.63918636  | 0.78062306  |
| 239582_at   | -0.0200837  | -0.51486065 | 0.608588148 | 0.757993717 |
| 239583_x_at | -0.00508314 | -0.15720149 | 0.875626757 | 0.933239001 |
| 239584_at   | -0.03018528 | -0.74707041 | 0.458009934 | 0.636663866 |
| 239585_at   | 0.433135294 | 5.604108783 | 5.92E-07    | 1.04E-05    |
| 239586_at   | 0.025303888 | 0.712966205 | 0.478697891 | 0.654209717 |
| 239587_at   | 0.082964389 | 1.924247155 | 0.059186813 | 0.145403312 |
| 239588_s_at | -0.02572354 | -0.73638975 | 0.464433028 | 0.642176873 |
| 239589_at   | -0.00999842 | -0.47504543 | 0.636521426 | 0.778440221 |
| 239590_x_at | -0.03887501 | -1.16243797 | 0.249772615 | 0.422195073 |
| 239591_at   | 0.058701816 | 0.27744907  | 0.782412327 | 0.87563409  |
| 239592_at   | -0.02386504 | -0.63639029 | 0.527001524 | 0.695051873 |
| 239593_at   | 0.026601562 | 0.839817448 | 0.40442604  | 0.58674269  |
| 239594_at   | -0.02898954 | -1.06502516 | 0.291235765 | 0.469637523 |
| 239595_at   | -0.01381749 | -0.42658063 | 0.67124878  | 0.801990425 |

|             |             |             |             |             |
|-------------|-------------|-------------|-------------|-------------|
| 239596_at   | 0.001541309 | 0.048663264 | 0.961353227 | 0.980282426 |
| 239597_at   | 0.302481313 | 4.975430064 | 6.04E-06    | 7.03E-05    |
| 239598_s_at | -0.05323387 | -1.4245721  | 0.159587969 | 0.30778516  |
| 239599_at   | 0.048223449 | 1.331530175 | 0.188174147 | 0.346371695 |
| 239600_at   | -0.12759669 | -3.33067903 | 0.001503783 | 0.007179476 |
| 239601_at   | -0.07726253 | -1.85010559 | 0.069345013 | 0.164586686 |
| 239602_at   | -0.04005919 | -1.1129621  | 0.270272023 | 0.445911308 |
| 239603_x_at | 0.022024516 | 0.686253159 | 0.495261473 | 0.668461197 |
| 239604_at   | 0.003327069 | 0.103251391 | 0.918116201 | 0.956668048 |
| 239605_x_at | 0.107285357 | 2.79292824  | 0.007045468 | 0.026191654 |
| 239606_at   | 0.00547035  | 0.148774687 | 0.882242518 | 0.937027558 |
| 239607_at   | -0.01414997 | -0.35576291 | 0.723296391 | 0.838176639 |
| 239608_at   | -0.16335954 | -4.7860825  | 1.19E-05    | 0.00012342  |
| 239609_s_at | -0.40619706 | -6.29754449 | 4.24E-08    | 1.29E-06    |
| 239610_at   | 0.031013726 | 0.742740429 | 0.460607703 | 0.638999439 |
| 239611_at   | 0.587296695 | 6.681665887 | 9.62E-09    | 4.35E-07    |
| 239612_at   | -0.05306716 | -1.33931374 | 0.185643211 | 0.343394991 |
| 239613_at   | -0.01977833 | -0.57731178 | 0.565941652 | 0.726308974 |
| 239614_x_at | 0.049556756 | 1.793544122 | 0.078049147 | 0.180062589 |
| 239615_at   | 0.070998598 | 2.389376202 | 0.020116431 | 0.061870728 |
| 239616_at   | -0.06017699 | -1.51317452 | 0.135613405 | 0.273565078 |
| 239617_at   | -0.03800409 | -0.92413607 | 0.359207504 | 0.542336468 |
| 239618_at   | 0.008382791 | 0.360590567 | 0.719702875 | 0.835838525 |
| 239619_at   | 0.32051799  | 5.44177325  | 1.09E-06    | 1.71E-05    |
| 239620_at   | 0.089626962 | 2.26270769  | 0.027377093 | 0.07910118  |
| 239621_at   | 0.036398439 | 1.929642725 | 0.058499726 | 0.144071735 |
| 239622_at   | -0.05528019 | -2.1669944  | 0.034314767 | 0.094789268 |
| 239623_at   | -0.03115313 | -1.2080426  | 0.231886399 | 0.400303872 |
| 239624_at   | -0.18394935 | -2.92585828 | 0.004881486 | 0.019344156 |
| 239625_at   | 0.025490918 | 1.089462067 | 0.280412739 | 0.457617412 |
| 239626_x_at | -0.08769995 | -2.59774196 | 0.011849928 | 0.040045139 |
| 239627_at   | 0.020466571 | 0.596175796 | 0.553355133 | 0.71579009  |
| 239628_at   | -0.03327594 | -1.026215   | 0.309010207 | 0.489571194 |
| 239629_at   | 0.712354098 | 7.427188371 | 5.32E-10    | 6.02E-08    |
| 239630_at   | 0.134288274 | 2.301398528 | 0.024945285 | 0.073597484 |
| 239631_at   | 0.067212772 | 2.841235368 | 0.006173203 | 0.023465169 |
| 239632_at   | 0.120521794 | 1.776988273 | 0.080763274 | 0.185053691 |
| 239633_at   | -0.03699046 | -1.07273052 | 0.287792405 | 0.465981384 |
| 239634_at   | 0.08302459  | 2.325694211 | 0.023518138 | 0.07026826  |
| 239635_at   | 0.1040099   | 2.425460485 | 0.018390811 | 0.057569665 |
| 239636_at   | 0.036192566 | 0.894457566 | 0.374738369 | 0.557925484 |
| 239637_at   | -0.09646295 | -2.35572668 | 0.021854745 | 0.066210157 |
| 239638_at   | -0.19766875 | -4.77469586 | 1.24E-05    | 0.00012769  |
| 239639_at   | 0.03150457  | 1.128427521 | 0.263740757 | 0.438589839 |
| 239640_at   | 0.001989    | 0.065391741 | 0.948084804 | 0.973415563 |
| 239641_at   | -0.03445602 | -1.08668366 | 0.281628977 | 0.458851541 |
| 239642_at   | -0.05246077 | -1.50151683 | 0.138594588 | 0.277997816 |
| 239643_at   | -0.00040802 | -0.00817735 | 0.993503286 | 0.997070502 |
| 239644_at   | -0.0945357  | -2.05622364 | 0.044226128 | 0.115897595 |
| 239645_at   | 0.041476069 | 1.248264239 | 0.216901615 | 0.383077137 |
| 239646_at   | 0.034117527 | 0.778888824 | 0.439181065 | 0.619625601 |
| 239647_at   | 0.066060538 | 1.841813691 | 0.070567502 | 0.166621027 |
| 239648_at   | 0.018079761 | 0.577497895 | 0.565816783 | 0.726213597 |
| 239649_at   | 0.037545643 | 1.089456726 | 0.280415073 | 0.457617412 |
| 239650_at   | 0.133268327 | 2.870598384 | 0.005692907 | 0.021925836 |
| 239651_at   | -0.00757888 | -0.15417796 | 0.877999491 | 0.934675653 |
| 239652_at   | -0.07579908 | -1.98364628 | 0.051989404 | 0.131475995 |
| 239653_at   | 0.347727018 | 5.457010852 | 1.03E-06    | 1.63E-05    |
| 239654_at   | 0.008694546 | 0.191129659 | 0.849085066 | 0.917155523 |
| 239655_at   | 0.029910633 | 0.821232545 | 0.414844305 | 0.597031677 |
| 239656_at   | -0.03085334 | -0.82607212 | 0.412115795 | 0.59442566  |
| 239657_x_at | -0.04622296 | -0.89175032 | 0.376175981 | 0.558924846 |
| 239658_at   | 0.035288796 | 1.30952598  | 0.195470319 | 0.355916052 |
| 239659_at   | 0.011864446 | 0.395777266 | 0.693707466 | 0.818349586 |
| 239660_at   | 0.123633823 | 2.9566302   | 0.004477526 | 0.018021399 |
| 239661_at   | 0.167096062 | 3.791456291 | 0.000356411 | 0.002149625 |
| 239662_x_at | 0.063159236 | 1.489003097 | 0.14185206  | 0.282666857 |
| 239663_x_at | -0.05189363 | -1.11954797 | 0.267476937 | 0.442749282 |
| 239664_at   | 0.018469088 | 0.385031    | 0.701609231 | 0.823776889 |
| 239665_at   | -0.08808144 | -2.06528977 | 0.043330663 | 0.114007653 |
| 239666_at   | -0.00163455 | -0.03350763 | 0.973383722 | 0.986539942 |
| 239667_at   | -0.01711698 | -0.70101218 | 0.486071446 | 0.660807721 |
| 239668_at   | 0.032978578 | 1.02516399  | 0.309501577 | 0.490042331 |
| 239669_at   | 0.048822099 | 1.284640266 | 0.203976009 | 0.366984318 |
| 239670_at   | -0.07954153 | -2.0299891  | 0.046908119 | 0.121348557 |



|             |             |             |             |             |
|-------------|-------------|-------------|-------------|-------------|
| 239671_at   | -0.90725645 | -6.89146729 | 4.27E-09    | 2.47E-07    |
| 239672_at   | 0.087269534 | 1.746570004 | 0.085954838 | 0.194093252 |
| 239673_at   | 0.261889    | 4.314092885 | 6.24E-05    | 0.000495205 |
| 239674_at   | -0.00981956 | -0.40192569 | 0.689201757 | 0.814884122 |
| 239675_at   | -0.05382861 | -1.30486147 | 0.197043962 | 0.357964667 |
| 239676_x_at | 0.06352291  | 1.738600192 | 0.087359901 | 0.196570772 |
| 239677_at   | -0.00689674 | -0.22010679 | 0.826553429 | 0.903808343 |
| 239678_at   | -0.78079733 | -6.2803296  | 4.52E-08    | 1.36E-06    |
| 239679_at   | -0.07824512 | -2.27759605 | 0.026417529 | 0.077035901 |
| 239680_at   | 0.020862607 | 0.940206381 | 0.350973533 | 0.534199814 |
| 239681_at   | 0.048680565 | 1.850663082 | 0.069263465 | 0.164436801 |
| 239682_at   | -0.01506819 | -0.31583345 | 0.753251725 | 0.858024509 |
| 239683_at   | -0.02575147 | -0.74021983 | 0.462123817 | 0.640283076 |
| 239684_at   | 0.003527945 | 0.08753094  | 0.930548094 | 0.96375731  |
| 239685_at   | -0.00987017 | -0.34491041 | 0.731397337 | 0.843246563 |
| 239686_at   | -0.00294274 | -0.09234937 | 0.926735639 | 0.961613828 |
| 239687_at   | 0.062730663 | 2.028472152 | 0.047067404 | 0.121647953 |
| 239688_at   | 1.07E-05    | 0.000355782 | 0.999717336 | 0.999822772 |
| 239689_at   | 0.075478209 | 2.071678685 | 0.042709103 | 0.112630862 |
| 239690_at   | -0.17694814 | -3.78770627 | 0.000360751 | 0.002170013 |
| 239691_at   | -0.05145123 | -1.68480819 | 0.097347889 | 0.21321597  |
| 239692_at   | 0.077493037 | 3.254245783 | 0.001890641 | 0.00870022  |
| 239693_at   | 0.063595667 | 2.087557129 | 0.041197723 | 0.109458929 |
| 239694_at   | -0.0069671  | -0.23149428 | 0.817737732 | 0.898207288 |
| 239695_at   | 0.019199072 | 0.415815551 | 0.679064689 | 0.807784599 |
| 239696_at   | 0.078679999 | 1.828155823 | 0.072620615 | 0.170334865 |
| 239697_x_at | 0.055256347 | 2.363480656 | 0.021442698 | 0.065187304 |
| 239698_at   | -0.19105422 | -4.8265771  | 1.03E-05    | 0.000109689 |
| 239699_s_at | -0.08376814 | -2.03793209 | 0.046081655 | 0.119751211 |
| 239700_at   | 0.04660412  | 1.04108455  | 0.302115075 | 0.48177146  |
| 239701_at   | 0.062223123 | 1.947783862 | 0.056239207 | 0.139876602 |
| 239702_x_at | -0.01941111 | -0.59497816 | 0.554150025 | 0.716569882 |
| 239703_at   | -0.0254598  | -0.76213914 | 0.449035492 | 0.628489374 |
| 239704_at   | -0.03328708 | -0.9839117  | 0.329206285 | 0.51161024  |
| 239705_at   | 0.03250775  | 1.058374    | 0.294230789 | 0.472866687 |
| 239706_x_at | 0.011224964 | 0.301432565 | 0.76415236  | 0.864376782 |
| 239707_at   | -0.04740296 | -1.82904614 | 0.072485267 | 0.170079884 |
| 239708_at   | 0.006634071 | 0.273633536 | 0.785328977 | 0.877537623 |
| 239709_at   | 0.100761606 | 2.784483627 | 0.007209135 | 0.026678037 |
| 239710_at   | 0.639447449 | 6.317024442 | 3.93E-08    | 1.23E-06    |
| 239711_at   | 0.114964457 | 2.477753755 | 0.016125587 | 0.051639778 |
| 239712_at   | 0.000672256 | 0.026010524 | 0.97933737  | 0.989634064 |
| 239713_at   | 0.034205934 | 0.84665387  | 0.40063444  | 0.582944959 |
| 239714_at   | 0.119361708 | 3.782896415 | 0.000366393 | 0.002197962 |
| 239715_at   | 0.001791733 | 0.040031982 | 0.968203785 | 0.983870474 |
| 239716_at   | 0.094330953 | 2.352593542 | 0.022023234 | 0.066599611 |
| 239717_at   | -0.04118553 | -1.37997935 | 0.172838498 | 0.32631371  |
| 239718_at   | -0.0695394  | -2.1391451  | 0.036603674 | 0.099719075 |
| 239719_at   | 0.032823803 | 0.86756708  | 0.389172299 | 0.572040401 |
| 239720_at   | -0.03961917 | -1.2415246  | 0.219361421 | 0.386185323 |
| 239721_at   | 0.035557475 | 0.849077086 | 0.399295758 | 0.581603038 |
| 239722_at   | 0.18904033  | 2.692209513 | 0.009239925 | 0.032753071 |
| 239723_at   | 0.046885207 | 1.324112558 | 0.190610309 | 0.349473085 |
| 239724_at   | 0.014118531 | 0.332449145 | 0.740737142 | 0.84949695  |
| 239725_at   | -0.0770241  | -1.18683466 | 0.240084778 | 0.41003779  |
| 239726_at   | 0.070729855 | 0.888437484 | 0.377939916 | 0.560433018 |
| 239727_at   | 0.165980651 | 4.116973066 | 0.000121927 | 0.000872142 |
| 239728_at   | 0.023489391 | 0.780449431 | 0.438269437 | 0.61874961  |
| 239729_at   | -0.02344532 | -0.71933401 | 0.474795789 | 0.650713252 |
| 239730_at   | 0.032107174 | 0.836451242 | 0.406301061 | 0.588639798 |
| 239731_at   | 0.071392195 | 1.194865878 | 0.236955818 | 0.406293091 |
| 239732_x_at | -0.09726437 | -2.09490275 | 0.0405144   | 0.107970756 |
| 239733_at   | 0.144303836 | 1.542255953 | 0.128397818 | 0.262709118 |
| 239734_at   | 0.081743422 | 2.873329617 | 0.005650035 | 0.021788884 |
| 239735_at   | 0.647628121 | 5.215803895 | 2.51E-06    | 3.41E-05    |
| 239736_at   | -0.0330601  | -0.73404992 | 0.465846987 | 0.64341726  |
| 239737_at   | 0.028941993 | 0.68625882  | 0.49525793  | 0.668461197 |
| 239738_at   | -0.52491181 | -6.44962491 | 2.36E-08    | 8.30E-07    |
| 239739_at   | -0.024678   | -0.7663781  | 0.446529469 | 0.62639427  |
| 239740_at   | 0.095867677 | 1.578375474 | 0.119865891 | 0.249280893 |
| 239741_at   | -0.02386655 | -0.54839053 | 0.58550821  | 0.740804956 |
| 239742_at   | 0.13493875  | 1.50895237  | 0.1366872   | 0.275096232 |
| 239743_at   | -0.07018972 | -1.73180366 | 0.088573085 | 0.198540892 |
| 239744_at   | 0.375349143 | 6.524436913 | 1.77E-08    | 6.73E-07    |
| 239745_at   | -0.03287816 | -1.2108449  | 0.230818544 | 0.39899986  |

|             |             |             |             |             |
|-------------|-------------|-------------|-------------|-------------|
| 239746_at   | -0.12918155 | -3.25867808 | 0.00186586  | 0.008611007 |
| 239747_s_at | -0.00290512 | -0.08691316 | 0.931037018 | 0.964097603 |
| 239748_x_at | 0.332287358 | 6.74226472  | 7.61E-09    | 3.68E-07    |
| 239749_at   | -0.06637731 | -2.20839061 | 0.031144373 | 0.087756403 |
| 239750_x_at | -0.15155315 | -3.73186489 | 0.000431693 | 0.002528602 |
| 239751_at   | -0.01219707 | -0.29182949 | 0.771448223 | 0.869171911 |
| 239752_at   | 0.378926407 | 6.473907177 | 2.15E-08    | 7.77E-07    |
| 239753_at   | 0.066695437 | 2.415568286 | 0.018850144 | 0.058736014 |
| 239754_at   | 0.090326479 | 2.93754105  | 0.004724294 | 0.018829765 |
| 239755_at   | 0.02922006  | 0.901887446 | 0.37081086  | 0.554052891 |
| 239756_at   | -0.00413285 | -0.11247903 | 0.910828241 | 0.952907881 |
| 239757_at   | 0.351487216 | 5.948940375 | 1.61E-07    | 3.63E-06    |
| 239758_at   | -0.00838555 | -0.15563209 | 0.876858212 | 0.933994643 |
| 239759_at   | -0.04524555 | -1.24852329 | 0.216807473 | 0.382956272 |
| 239760_at   | -0.13381289 | -2.71763839 | 0.008633452 | 0.030976738 |
| 239761_at   | -0.18340759 | -4.57372854 | 2.53E-05    | 0.00023323  |
| 239762_at   | 0.300441752 | 5.566667987 | 6.81E-07    | 1.16E-05    |
| 239763_at   | -0.08396918 | -2.51479179 | 0.014676752 | 0.047707716 |
| 239764_at   | -0.35850341 | -4.91567568 | 7.49E-06    | 8.42E-05    |
| 239765_at   | -0.72693052 | -4.85805606 | 9.22E-06    | 9.99E-05    |
| 239766_at   | 0.057747968 | 1.335368702 | 0.18692275  | 0.344834127 |
| 239767_at   | -0.97257109 | -6.63158986 | 1.17E-08    | 5.03E-07    |
| 239768_x_at | -0.03459782 | -1.54113861 | 0.12866928  | 0.263173454 |
| 239769_at   | -0.18110703 | -4.33767031 | 5.76E-05    | 0.000463684 |
| 239770_at   | -0.11197261 | -2.67466791 | 0.009680753 | 0.034000174 |
| 239771_at   | 0.161921383 | 3.738688207 | 0.000422357 | 0.002481168 |
| 239772_x_at | 0.117943807 | 2.310254688 | 0.024416393 | 0.072385899 |
| 239773_at   | -0.00574631 | -0.15908419 | 0.87414988  | 0.932239193 |
| 239774_at   | 0.026228419 | 0.680655313 | 0.498771841 | 0.67178323  |
| 239775_at   | -0.00137705 | -0.03596448 | 0.971432985 | 0.98554624  |
| 239776_at   | 0.185544727 | 1.510179092 | 0.136374524 | 0.274654149 |
| 239777_at   | 0.005029943 | 0.159900407 | 0.873509739 | 0.931960592 |
| 239778_x_at | 0.253310568 | 3.745431171 | 0.000413321 | 0.002438889 |
| 239779_at   | 0.067553722 | 1.524813681 | 0.132687872 | 0.269185598 |
| 239780_at   | 0.102207395 | 2.211180286 | 0.030940302 | 0.087230884 |
| 239781_at   | -0.01344867 | -0.45095513 | 0.653687152 | 0.790079508 |
| 239782_at   | 0.010970508 | 0.346409595 | 0.730276403 | 0.842715098 |
| 239783_at   | -0.03434805 | -1.22695557 | 0.224748844 | 0.391964229 |
| 239784_at   | 0.007027568 | 0.151383255 | 0.880193646 | 0.935807746 |
| 239785_at   | 0.083800952 | 2.142181597 | 0.036347788 | 0.099199146 |
| 239786_at   | -0.0049812  | -0.1429792  | 0.886797398 | 0.939253704 |
| 239787_at   | -0.32553777 | -2.92868725 | 0.004842983 | 0.019218843 |
| 239788_at   | 0.204276594 | 4.540992315 | 2.84E-05    | 0.000256241 |
| 239789_at   | 0.055574049 | 1.330837687 | 0.188400578 | 0.346638775 |
| 239790_s_at | 0.034670061 | 0.914622098 | 0.364140413 | 0.547380288 |
| 239791_at   | 0.008246882 | 0.231030376 | 0.818096413 | 0.898492736 |
| 239792_at   | -0.00560093 | -0.16329886 | 0.870845328 | 0.930243612 |
| 239793_at   | 0.091609616 | 2.331075489 | 0.023212044 | 0.069493079 |
| 239794_at   | 0.038924937 | 0.851928429 | 0.397724101 | 0.580053508 |
| 239795_at   | -0.05411599 | -1.35954813 | 0.179184596 | 0.334913554 |
| 239796_x_at | -0.06163248 | -2.48581389 | 0.015799741 | 0.050770926 |
| 239797_at   | 0.085146857 | 2.424694508 | 0.018426016 | 0.057651954 |
| 239798_at   | 0.119950281 | 2.642975309 | 0.010526251 | 0.03634033  |
| 239799_at   | 0.099785031 | 1.788762625 | 0.078825079 | 0.181496673 |
| 239800_at   | 0.054249052 | 1.532927311 | 0.130678306 | 0.266229422 |
| 239801_at   | 0.047283801 | 1.315349517 | 0.19351895  | 0.353471837 |
| 239802_at   | -0.02095824 | -0.62245491 | 0.53605887  | 0.702320093 |
| 239803_at   | -0.07377268 | -2.52656292 | 0.01424157  | 0.046506227 |
| 239804_at   | 0.206496744 | 3.500532407 | 0.000894806 | 0.004649536 |
| 239805_at   | 0.027987417 | 1.194549253 | 0.237078613 | 0.406456857 |
| 239806_at   | -0.0555587  | -1.37579204 | 0.174124869 | 0.328087479 |
| 239807_at   | -0.04637889 | -1.22213107 | 0.22655408  | 0.394036414 |
| 239808_at   | 0.64784677  | 7.196852674 | 1.30E-09    | 1.12E-07    |
| 239809_at   | 0.144417323 | 4.228170781 | 8.37E-05    | 0.00063384  |
| 239810_at   | 0.062072782 | 1.853963142 | 0.068782396 | 0.163520552 |
| 239811_at   | 0.141225379 | 3.87070077  | 0.000275589 | 0.001731079 |
| 239812_s_at | 0.006292033 | 0.1650366   | 0.869483507 | 0.929439998 |
| 239813_at   | -0.05490904 | -1.40900041 | 0.164122536 | 0.314256035 |
| 239814_at   | -0.02240789 | -0.62212213 | 0.536276137 | 0.702542961 |
| 239815_at   | 0.064818444 | 2.003379329 | 0.049770704 | 0.127022512 |
| 239816_at   | -0.01877132 | -0.65071158 | 0.517777518 | 0.687396413 |
| 239817_at   | -0.02534942 | -0.67981428 | 0.499300414 | 0.672077022 |
| 239818_x_at | -0.05447483 | -1.56561327 | 0.122826951 | 0.254032213 |
| 239819_at   | 0.016467175 | 0.459572523 | 0.64752452  | 0.786155385 |
| 239820_at   | -0.05491145 | -1.33540424 | 0.186911194 | 0.344827914 |

|             |             |             |             |             |
|-------------|-------------|-------------|-------------|-------------|
| 239821_at   | -0.04588439 | -1.38519475 | 0.171246497 | 0.324130235 |
| 239822_at   | 0.6119113   | 4.465271329 | 3.70E-05    | 0.000320927 |
| 239823_at   | 0.007429639 | 0.385116682 | 0.701546096 | 0.823776889 |
| 239824_s_at | 0.009458753 | 0.198652974 | 0.843222218 | 0.913878652 |
| 239825_at   | -0.0649714  | -1.8938326  | 0.063189659 | 0.153206436 |
| 239826_at   | 0.144348509 | 2.494711535 | 0.015446945 | 0.049846536 |
| 239827_at   | -0.01390853 | -0.39966784 | 0.690855057 | 0.816146932 |
| 239828_at   | 0.00444795  | 0.076059537 | 0.93963096  | 0.968429003 |
| 239829_at   | 0.045197245 | 1.602937024 | 0.114328717 | 0.240768025 |
| 239830_at   | 0.044956234 | 1.428507738 | 0.158457417 | 0.306133181 |
| 239831_at   | 0.10775277  | 2.177459557 | 0.033487639 | 0.092946811 |
| 239832_at   | 0.050939359 | 1.445938971 | 0.153524763 | 0.299164103 |
| 239833_at   | 0.108848548 | 2.375685466 | 0.02080818  | 0.063586954 |
| 239834_at   | 0.01142292  | 0.282002446 | 0.778935766 | 0.8735151   |
| 239835_at   | -0.17388988 | -3.34088796 | 0.001458171 | 0.006999095 |
| 239836_at   | -0.02309213 | -0.5509809  | 0.583742629 | 0.739478779 |
| 239837_at   | -0.14161196 | -2.64117438 | 0.010576262 | 0.036477412 |
| 239838_at   | -0.01182659 | -0.3170143  | 0.752360089 | 0.857395444 |
| 239839_at   | -0.03050062 | -1.15167647 | 0.254133877 | 0.427288336 |
| 239840_at   | -0.05952062 | -1.69231605 | 0.095899978 | 0.210829939 |
| 239841_at   | 0.021795991 | 0.553340785 | 0.582136366 | 0.738024466 |
| 239842_x_at | -0.12522172 | -1.87340935 | 0.066004464 | 0.158441912 |
| 239843_at   | 0.067350442 | 1.755731196 | 0.084362929 | 0.191262011 |
| 239844_x_at | 0.025585242 | 0.67796771  | 0.500462026 | 0.672964522 |
| 239845_at   | 0.085626861 | 1.523779335 | 0.132945812 | 0.269583222 |
| 239846_at   | 0.112365654 | 2.864479745 | 0.005790045 | 0.022244363 |
| 239847_at   | -0.00185552 | -0.05352271 | 0.957497594 | 0.978270408 |
| 239848_at   | -0.14970916 | -3.28546903 | 0.001722463 | 0.008046443 |
| 239849_at   | 0.097742911 | 2.456875589 | 0.016997976 | 0.053950254 |
| 239850_at   | -0.05915513 | -1.84922601 | 0.069473839 | 0.164822424 |
| 239851_at   | 0.251645236 | 3.716668052 | 0.000453202 | 0.002635587 |
| 239852_at   | -0.02220175 | -0.63769981 | 0.526154534 | 0.69449477  |
| 239853_at   | 0.01478881  | 0.455615238 | 0.650351486 | 0.788159894 |
| 239854_at   | 0.046335725 | 1.381482267 | 0.172378572 | 0.325637973 |
| 239855_at   | -0.03596789 | -1.11825543 | 0.268023884 | 0.443369856 |
| 239856_at   | 0.069630723 | 1.560037966 | 0.124138784 | 0.256152664 |
| 239857_at   | 0.135341312 | 1.238336931 | 0.220531975 | 0.387471763 |
| 239858_at   | -0.11939341 | -2.80681343 | 0.006783779 | 0.025372891 |
| 239859_x_at | 0.068789168 | 1.344957711 | 0.183824202 | 0.340987719 |
| 239860_at   | -0.05734336 | -1.73037811 | 0.088829306 | 0.198945595 |
| 239861_at   | 0.039154891 | 0.826316718 | 0.411978182 | 0.594271424 |
| 239862_at   | 0.099860232 | 2.202395146 | 0.031586966 | 0.088740551 |
| 239863_at   | -0.18269775 | -3.72823679 | 0.000436738 | 0.002553463 |
| 239864_at   | -0.00369208 | -0.12020351 | 0.904733359 | 0.949452726 |
| 239865_at   | 0.022904902 | 0.55355026  | 0.581993889 | 0.737948503 |
| 239866_at   | -0.0557236  | -1.04060959 | 0.302333682 | 0.481965291 |
| 239867_at   | 0.050046267 | 1.249599324 | 0.216416765 | 0.382492904 |
| 239868_at   | 0.060577062 | 1.887469176 | 0.064055571 | 0.154878359 |
| 239869_at   | -0.03712329 | -0.94487592 | 0.348604184 | 0.531644074 |
| 239870_at   | 0.05671769  | 1.157158404 | 0.251905491 | 0.424756092 |
| 239871_at   | -0.02500877 | -0.89714479 | 0.373314842 | 0.556380662 |
| 239872_at   | -0.0972878  | -1.33330058 | 0.187596192 | 0.345605714 |
| 239873_at   | 0.001333258 | 0.037617077 | 0.970120923 | 0.984908209 |
| 239874_at   | -0.09529203 | -1.51363118 | 0.135497667 | 0.273417994 |
| 239875_at   | -0.08728088 | -2.32830702 | 0.023369073 | 0.069892966 |
| 239876_at   | 0.143018596 | 4.556560297 | 2.69E-05    | 0.000245149 |
| 239877_at   | -0.08793023 | -2.69825633 | 0.009092276 | 0.032311703 |
| 239878_at   | -0.00954295 | -0.45870437 | 0.648144259 | 0.786480497 |
| 239879_at   | 0.132272644 | 1.896748339 | 0.062796222 | 0.152430913 |
| 239880_at   | 0.031357622 | 0.608003578 | 0.545535755 | 0.709618836 |
| 239881_at   | 0.009135033 | 0.241565515 | 0.809960642 | 0.893311313 |
| 239882_at   | 0.036404761 | 1.208594451 | 0.231675825 | 0.400048526 |
| 239883_s_at | -0.01992069 | -0.65125108 | 0.517431726 | 0.687059798 |
| 239884_at   | -0.23224996 | -3.06987774 | 0.003243453 | 0.013720434 |
| 239885_at   | -0.01448142 | -0.42379333 | 0.673269027 | 0.803507246 |
| 239886_at   | 0.361330454 | 6.777527887 | 6.64E-09    | 3.37E-07    |
| 239887_at   | 0.013206156 | 0.276362656 | 0.78324248  | 0.876084128 |
| 239888_at   | -0.50395114 | -5.232739   | 2.36E-06    | 3.24E-05    |
| 239889_at   | 0.119224402 | 2.840547789 | 0.006184886 | 0.023500674 |
| 239890_s_at | 0.099089416 | 2.156298868 | 0.035178551 | 0.096637766 |
| 239891_x_at | 0.134631436 | 1.786788214 | 0.079147355 | 0.182088623 |
| 239892_at   | 0.098386114 | 2.58484694  | 0.012254088 | 0.041168134 |
| 239893_at   | -0.13170938 | -2.98571789 | 0.004124444 | 0.016816865 |
| 239894_at   | 0.000139929 | 0.003641993 | 0.997106493 | 0.998640408 |
| 239895_at   | 0.074348892 | 2.986818684 | 0.004111605 | 0.016772167 |

|             |             |             |             |             |
|-------------|-------------|-------------|-------------|-------------|
| 239896_at   | -0.04103646 | -0.79309591 | 0.43092327  | 0.611779631 |
| 239897_at   | -0.15734231 | -2.73919375 | 0.008148178 | 0.029529546 |
| 239898_x_at | 0.02425188  | 0.733628856 | 0.466101693 | 0.643616619 |
| 239899_at   | -0.10986085 | -2.55943764 | 0.013087336 | 0.043444939 |
| 239900_x_at | 0.087899893 | 2.563666576 | 0.012945185 | 0.043043389 |
| 239901_at   | 0.274048779 | 3.627488255 | 0.000601607 | 0.003344155 |
| 239902_at   | 0.017032454 | 0.647391282 | 0.519908392 | 0.689097054 |
| 239903_at   | -0.5420496  | -7.4004764  | 5.90E-10    | 6.53E-08    |
| 239904_at   | -0.03735053 | -1.32456499 | 0.190461037 | 0.349328381 |
| 239905_at   | 0.023587072 | 0.854468739 | 0.396327112 | 0.578939411 |
| 239906_at   | -0.04319079 | -1.62381402 | 0.109786221 | 0.233569966 |
| 239907_at   | -0.0064977  | -0.11941151 | 0.905358011 | 0.949885208 |
| 239908_at   | 0.196484487 | 3.740559708 | 0.00041983  | 0.002469473 |
| 239909_at   | -0.04386468 | -1.27897447 | 0.20595058  | 0.369360577 |
| 239910_at   | -0.0631787  | -1.97481701 | 0.053009292 | 0.133500015 |
| 239911_at   | -0.9120721  | -7.51555543 | 3.77E-10    | 4.86E-08    |
| 239912_at   | 0.114152616 | 3.083395913 | 0.003119524 | 0.013276617 |
| 239913_at   | -0.29420339 | -2.85204699 | 0.005992161 | 0.022879568 |
| 239914_at   | 0.011184529 | 0.431533467 | 0.667664955 | 0.799824856 |
| 239915_at   | 0.070502458 | 1.547060112 | 0.127235828 | 0.260990677 |
| 239916_at   | 0.439643695 | 2.437938721 | 0.017825742 | 0.056100354 |
| 239917_at   | 0.079956924 | 1.847069796 | 0.069790499 | 0.165345473 |
| 239918_at   | 0.048372415 | 1.493793696 | 0.140597953 | 0.280912514 |
| 239919_at   | 0.00301551  | 0.098022063 | 0.922249484 | 0.95931977  |
| 239920_at   | -0.05518437 | -1.06306654 | 0.292115541 | 0.470594324 |
| 239921_at   | 0.08011112  | 1.666054901 | 0.101042921 | 0.219309904 |
| 239922_at   | 0.042130356 | 1.370092137 | 0.175887691 | 0.330506755 |
| 239923_at   | 0.115748425 | 2.700319037 | 0.009042405 | 0.03217029  |
| 239924_at   | 0.152746249 | 4.241607562 | 8.00E-05    | 0.000610706 |
| 239925_at   | 0.00540389  | 0.125765058 | 0.900348641 | 0.946763169 |
| 239926_at   | -0.02131296 | -0.63819715 | 0.525833045 | 0.694172932 |
| 239927_at   | -0.05658065 | -1.86008178 | 0.067897898 | 0.161969194 |
| 239928_at   | 0.022219962 | 0.643451602 | 0.52244277  | 0.691310505 |
| 239929_at   | 0.019230619 | 0.465475938 | 0.643316983 | 0.783345301 |
| 239930_at   | 0.22033696  | 4.749149715 | 1.36E-05    | 0.000137977 |
| 239931_at   | -0.01333495 | -0.31063374 | 0.757181922 | 0.860369387 |
| 239932_at   | 0.010834793 | 0.360578474 | 0.719711869 | 0.835838525 |
| 239933_x_at | -0.04328661 | -0.97154749 | 0.335271267 | 0.518065321 |
| 239934_x_at | 0.05213257  | 1.580288299 | 0.119427064 | 0.248595201 |
| 239935_at   | -0.0586136  | -2.40165992 | 0.019513371 | 0.060404768 |
| 239936_at   | 0.050643159 | 1.638199529 | 0.106742148 | 0.228571705 |
| 239937_at   | 0.224098046 | 3.662817123 | 0.000537975 | 0.003046912 |
| 239938_x_at | 0.004508268 | 0.265262031 | 0.791739065 | 0.881349066 |
| 239939_at   | -0.03019068 | -0.82826458 | 0.410883302 | 0.593164821 |
| 239940_at   | -0.01601173 | -0.55787416 | 0.579056661 | 0.735798043 |
| 239941_at   | 0.073626069 | 2.364551471 | 0.021386344 | 0.065055002 |
| 239942_at   | 0.024307334 | 0.739601076 | 0.462496428 | 0.640549454 |
| 239943_x_at | -0.04184149 | -1.35744918 | 0.179846489 | 0.335864065 |
| 239944_at   | -0.0504474  | -0.8864416  | 0.379005156 | 0.561658547 |
| 239945_at   | 0.040925108 | 1.266114081 | 0.210485316 | 0.375199234 |
| 239946_at   | -0.25693489 | -4.87251684 | 8.75E-06    | 9.56E-05    |
| 239947_at   | 0.021890096 | 0.665814498 | 0.508143703 | 0.679308377 |
| 239948_at   | 0.149834935 | 4.647120273 | 1.96E-05    | 0.000187633 |
| 239949_at   | 0.014473698 | 0.360448173 | 0.719808777 | 0.83590214  |
| 239950_at   | 0.026607859 | 0.729849426 | 0.468391478 | 0.645334236 |
| 239951_at   | 0.320311662 | 4.984424217 | 5.84E-06    | 6.83E-05    |
| 239952_at   | 0.000530259 | 0.016376795 | 0.986989455 | 0.993681889 |
| 239953_at   | -0.16322364 | -3.91725759 | 0.000236654 | 0.001522462 |
| 239954_at   | 0.261388105 | 4.320719784 | 6.10E-05    | 0.000485883 |
| 239955_at   | 0.361910038 | 7.590695329 | 2.82E-10    | 4.06E-08    |
| 239956_at   | -0.09243865 | -1.39334015 | 0.168782679 | 0.320797632 |
| 239957_at   | 0.058394737 | 1.332006655 | 0.188018466 | 0.346198141 |
| 239958_at   | 0.032592337 | 1.155384879 | 0.252624888 | 0.425583757 |
| 239959_x_at | -0.08747866 | -2.15179519 | 0.035547933 | 0.097430897 |
| 239960_x_at | -0.10899524 | -2.69100564 | 0.009269581 | 0.032834014 |
| 239961_at   | 0.033502944 | 0.873178625 | 0.386131883 | 0.568806029 |
| 239962_at   | 0.00991146  | 0.386191184 | 0.700754529 | 0.823184504 |
| 239963_at   | 0.013397541 | 0.247119883 | 0.80567968  | 0.890595639 |
| 239964_at   | -0.02695781 | -0.90661848 | 0.368323696 | 0.551498346 |
| 239965_at   | 0.16132053  | 4.020271051 | 0.000168423 | 0.001138925 |
| 239966_at   | -0.02069637 | -0.58223299 | 0.562644541 | 0.723513447 |
| 239967_at   | -0.03428894 | -1.04417661 | 0.300694552 | 0.480140088 |
| 239968_at   | -0.00472858 | -0.12145787 | 0.903744154 | 0.948966212 |
| 239969_at   | 0.071295821 | 1.978387764 | 0.052594779 | 0.132695375 |
| 239970_at   | -0.03689481 | -1.19564661 | 0.236653227 | 0.405945576 |

|             |             |             |             |             |
|-------------|-------------|-------------|-------------|-------------|
| 239971_at   | 0.030694342 | 0.733373693 | 0.466256084 | 0.643672452 |
| 239972_at   | 0.017524265 | 0.532474934 | 0.596411606 | 0.749045439 |
| 239973_at   | 0.049526015 | 1.558202382 | 0.124573132 | 0.256906575 |
| 239974_at   | -0.01675324 | -0.39911788 | 0.691257994 | 0.816494496 |
| 239975_at   | -0.08538195 | -1.86050908 | 0.067836488 | 0.161848618 |
| 239976_at   | -0.05263535 | -1.80249959 | 0.076613032 | 0.177482356 |
| 239977_at   | -0.01647323 | -0.53061751 | 0.59769024  | 0.749926802 |
| 239978_at   | 0.067259814 | 1.642042163 | 0.105940734 | 0.227400379 |
| 239979_at   | 0.080687127 | 1.821608374 | 0.073622506 | 0.172171457 |
| 239980_at   | 0.045075748 | 1.222705828 | 0.226338462 | 0.393875809 |
| 239981_x_at | -0.02487205 | -0.91785405 | 0.362459825 | 0.545661553 |
| 239982_at   | 0.033440741 | 1.002875538 | 0.320046567 | 0.5017723   |
| 239983_at   | 0.013193815 | 0.369012934 | 0.713448827 | 0.831740309 |
| 239984_at   | -0.06593247 | -2.15330418 | 0.035423792 | 0.097174081 |
| 239985_at   | -0.02922807 | -0.66897908 | 0.506137377 | 0.677619425 |
| 239986_at   | -0.00369966 | -0.11613776 | 0.907940679 | 0.951208201 |
| 239987_at   | 0.032784933 | 0.762109781 | 0.449052876 | 0.628494023 |
| 239988_at   | -0.0831785  | -2.11465252 | 0.038725848 | 0.104154516 |
| 239989_at   | 0.008063596 | 0.284825625 | 0.776782504 | 0.87204119  |
| 239990_at   | -0.01465948 | -0.33438423 | 0.739284167 | 0.848899322 |
| 239991_at   | 0.006491552 | 0.205769734 | 0.83768438  | 0.91038568  |
| 239992_at   | 0.007151552 | 0.152814139 | 0.879070122 | 0.935104423 |
| 239993_at   | 0.050223479 | 1.096682722 | 0.277269049 | 0.453861093 |
| 239994_at   | -0.29751066 | -5.44077711 | 1.09E-06    | 1.71E-05    |
| 239995_at   | -0.00407572 | -0.11768332 | 0.90672126  | 0.950438504 |
| 239996_x_at | -0.04322426 | -0.68036386 | 0.498954982 | 0.671848347 |
| 239997_at   | -0.03174052 | -0.88512146 | 0.379710778 | 0.56238721  |
| 239998_at   | 0.020311341 | 0.530828212 | 0.597545131 | 0.749846669 |
| 239999_at   | 0.624889966 | 5.656407745 | 4.86E-07    | 8.84E-06    |
| 240000_at   | -0.11989497 | -4.39453878 | 4.73E-05    | 0.000393098 |
| 240001_at   | -0.06963572 | -1.30557417 | 0.196802908 | 0.357672138 |
| 240002_at   | 0.056601733 | 1.759494529 | 0.083716116 | 0.190041164 |
| 240003_at   | 0.015613722 | 0.58627595  | 0.559942983 | 0.721492627 |
| 240004_at   | 0.071840356 | 1.621161289 | 0.110355171 | 0.234488343 |
| 240005_at   | -0.16664211 | -3.38590646 | 0.001272189 | 0.006232235 |
| 240006_at   | 0.057404269 | 1.814032355 | 0.074796232 | 0.174276273 |
| 240007_at   | -0.05886412 | -2.0170478  | 0.048282055 | 0.124048381 |
| 240008_at   | 0.175681812 | 3.330360269 | 0.001505229 | 0.007183309 |
| 240009_at   | 0.000235363 | 0.005721785 | 0.995454146 | 0.997865528 |
| 240010_at   | -0.00333378 | -0.07913719 | 0.937193287 | 0.967374871 |
| 240011_at   | -0.05833837 | -1.44543845 | 0.153664709 | 0.299371542 |
| 240012_at   | 0.006942265 | 0.211765438 | 0.833025262 | 0.907639695 |
| 240013_at   | 0.017097482 | 0.550194025 | 0.584278691 | 0.739883616 |
| 240014_at   | 0.014803569 | 0.437219889 | 0.663559888 | 0.796963761 |
| 240015_at   | -0.0246164  | -0.71596355 | 0.476858926 | 0.652559293 |
| 240016_at   | 0.215026215 | 3.468658308 | 0.000987417 | 0.00504454  |
| 240017_at   | 0.032337462 | 0.858075519 | 0.394348868 | 0.577011034 |
| 240018_at   | 0.019023747 | 0.595031585 | 0.554114553 | 0.716565034 |
| 240019_at   | -0.01838234 | -0.66752821 | 0.507056685 | 0.678403106 |
| 240020_at   | -0.02688139 | -0.83120961 | 0.409231296 | 0.591429474 |
| 240021_at   | -0.00520529 | -0.13744909 | 0.891147285 | 0.941762934 |
| 240022_at   | 0.015530791 | 0.575129313 | 0.567406895 | 0.727085155 |
| 240023_at   | -0.00550364 | -0.16225767 | 0.871661474 | 0.930774862 |
| 240024_at   | 0.073218202 | 1.790404993 | 0.078557836 | 0.180989606 |
| 240025_x_at | -0.09004975 | -3.04886485 | 0.003445256 | 0.014451    |
| 240026_x_at | 0.331815928 | 2.667025619 | 0.009878754 | 0.03454086  |
| 240027_at   | -0.04009334 | -1.77315552 | 0.081402691 | 0.186165647 |
| 240028_at   | -0.04081572 | -1.5346624  | 0.13025172  | 0.265607235 |
| 240029_at   | -0.00061762 | -0.02053769 | 0.983684256 | 0.99200796  |
| 240030_at   | -0.06013362 | -1.54735797 | 0.127164062 | 0.260925406 |
| 240031_at   | 0.023593214 | 0.731263203 | 0.467534188 | 0.644729487 |
| 240032_at   | 0.055755606 | 1.775325115 | 0.081040222 | 0.185507561 |
| 240033_at   | -0.0207843  | -0.62859839 | 0.532056001 | 0.69910466  |
| 240034_at   | -0.03720657 | -1.48061746 | 0.144068493 | 0.285848267 |
| 240035_at   | -0.06734081 | -1.38456856 | 0.171437046 | 0.324378511 |
| 240036_at   | 0.010203119 | 0.259264584 | 0.796340256 | 0.884306332 |
| 240037_at   | -0.05999297 | -1.65039827 | 0.10421489  | 0.224691493 |
| 240038_at   | 0.447444091 | 4.753890457 | 1.34E-05    | 0.000136034 |
| 240039_at   | 0.054626367 | 1.560118508 | 0.124119754 | 0.256137048 |
| 240040_at   | -0.03063155 | -0.97880337 | 0.331703163 | 0.514282856 |
| 240041_at   | -0.01001465 | -0.27964999 | 0.780731337 | 0.874716593 |
| 240042_at   | -0.03932732 | -0.79809714 | 0.428038461 | 0.609271128 |
| 240043_at   | 0.034548685 | 1.225989678 | 0.225109416 | 0.392394009 |
| 240044_x_at | 0.028283389 | 0.703761682 | 0.48436992  | 0.659252341 |
| 240045_at   | -0.02313551 | -0.62955182 | 0.531436182 | 0.698536686 |

|             |             |             |             |             |
|-------------|-------------|-------------|-------------|-------------|
| 240046_at   | -0.04407717 | -1.2677947  | 0.209888532 | 0.374509453 |
| 240047_at   | 0.017324445 | 0.665188414 | 0.508541143 | 0.679677592 |
| 240048_at   | -0.0982375  | -2.50186883 | 0.015168332 | 0.049091397 |
| 240049_at   | -0.02951759 | -1.38286054 | 0.171957616 | 0.325131353 |
| 240050_s_at | -0.05899457 | -2.15887888 | 0.034968462 | 0.096168904 |
| 240051_at   | -0.05074276 | -1.12128314 | 0.266743924 | 0.442037875 |
| 240052_at   | -0.24000535 | -3.53972503 | 0.000792227 | 0.004197038 |
| 240053_x_at | 0.134234521 | 2.265937345 | 0.027166359 | 0.078634644 |
| 240054_at   | -0.05036411 | -1.56755951 | 0.122371636 | 0.253348457 |
| 240055_at   | -0.11092685 | -3.11185431 | 0.002872961 | 0.01237694  |
| 240056_at   | 0.041128916 | 1.268609974 | 0.209599485 | 0.374122644 |
| 240057_at   | 0.045871271 | 1.297615119 | 0.199507469 | 0.361104317 |
| 240058_at   | -0.01694223 | -0.66601281 | 0.508017845 | 0.679180757 |
| 240059_at   | -0.09700711 | -2.60065727 | 0.011760252 | 0.039790232 |
| 240060_at   | 0.050396232 | 1.237572065 | 0.220813526 | 0.387703233 |
| 240061_at   | 0.095375944 | 2.004430548 | 0.04965483  | 0.126795432 |
| 240062_at   | 0.00091686  | 0.035165623 | 0.972067257 | 0.985844263 |
| 240063_at   | 0.025868179 | 0.639234079 | 0.525163083 | 0.693595807 |
| 240064_at   | 0.015174921 | 0.346545485 | 0.730174828 | 0.84270245  |
| 240065_at   | 0.585208387 | 3.130837868 | 0.002718764 | 0.011826013 |
| 240066_at   | 0.039161643 | 1.439785917 | 0.155252087 | 0.3016226   |
| 240067_at   | -0.10821802 | -2.99353644 | 0.004034056 | 0.016504031 |
| 240068_at   | 0.034724909 | 0.934855553 | 0.353701417 | 0.536797872 |
| 240069_at   | -0.01594321 | -0.2979746  | 0.766777083 | 0.866133866 |
| 240070_at   | 0.055996435 | 2.08528639  | 0.041410974 | 0.10986876  |
| 240071_at   | 0.018420144 | 0.707865945 | 0.481836177 | 0.657019121 |
| 240072_at   | 0.128342371 | 3.235077584 | 0.002001427 | 0.009115231 |
| 240073_at   | -0.05847862 | -1.38719465 | 0.170639023 | 0.323321013 |
| 240074_at   | -0.0932816  | -1.85592261 | 0.068498089 | 0.163055691 |
| 240075_at   | -0.04241634 | -1.41073328 | 0.163613042 | 0.313487605 |
| 240076_at   | -0.05719573 | -1.32232171 | 0.191202031 | 0.350270585 |
| 240077_at   | -0.01962235 | -0.68262407 | 0.497535707 | 0.670662517 |
| 240078_at   | -0.00929279 | -0.22161285 | 0.825386184 | 0.903135218 |
| 240079_at   | 0.069240505 | 2.077375073 | 0.042161453 | 0.111528833 |
| 240080_at   | -0.04049474 | -1.10117368 | 0.275326268 | 0.451708895 |
| 240081_at   | 0.024719332 | 0.871018937 | 0.387300268 | 0.5699448   |
| 240082_s_at | 0.003509355 | 0.125014677 | 0.900940061 | 0.947162222 |
| 240083_at   | -0.08136281 | -1.72444208 | 0.089902808 | 0.200727434 |
| 240084_at   | -0.07031223 | -2.67817911 | 0.009591005 | 0.033730028 |
| 240085_at   | 0.001148113 | 0.028012482 | 0.977747433 | 0.988756034 |
| 240086_at   | 0.00871299  | 0.292156951 | 0.77119909  | 0.869014396 |
| 240087_at   | -0.00589195 | -0.16022441 | 0.873255658 | 0.931763436 |
| 240088_at   | -0.04473533 | -1.99792063 | 0.050376159 | 0.128227092 |
| 240089_at   | -0.02861544 | -1.07644405 | 0.286143009 | 0.464084169 |
| 240090_at   | -0.00454299 | -0.14240192 | 0.887251315 | 0.939445042 |
| 240091_at   | -0.02127754 | -1.01632421 | 0.313655303 | 0.494737163 |
| 240092_at   | 0.059571402 | 1.68559344  | 0.097195616 | 0.212976392 |
| 240093_x_at | -0.03548923 | -1.91454454 | 0.060439661 | 0.147936322 |
| 240094_at   | 0.13969581  | 3.967578637 | 0.000200534 | 0.001319919 |
| 240095_at   | -0.22452276 | -5.88865567 | 2.02E-07    | 4.36E-06    |
| 240096_at   | 0.010868771 | 0.294034361 | 0.769771227 | 0.868180703 |
| 240097_at   | -0.02709483 | -0.71371303 | 0.478239318 | 0.653780307 |
| 240098_at   | -0.00754939 | -0.2024189  | 0.840290793 | 0.912109298 |
| 240099_at   | 0.005271093 | 0.157295987 | 0.87555262  | 0.933226752 |
| 240100_at   | -0.0325883  | -1.06853079 | 0.289665666 | 0.467917719 |
| 240101_at   | 0.036385138 | 1.334863849 | 0.187086976 | 0.345065871 |
| 240102_at   | -0.05512781 | -1.51309557 | 0.135633424 | 0.273593111 |
| 240103_at   | 0.065031867 | 1.910487983 | 0.060970107 | 0.148913419 |
| 240104_at   | -0.02340262 | -0.63147037 | 0.53019007  | 0.697476934 |
| 240105_at   | 0.080252655 | 1.470850564 | 0.146684239 | 0.289483658 |
| 240106_at   | -0.33572315 | -6.30092568 | 4.18E-08    | 1.28E-06    |
| 240107_at   | -0.01751543 | -0.70752925 | 0.482043752 | 0.657203191 |
| 240108_at   | -0.00012156 | -0.00327479 | 0.997398227 | 0.998747055 |
| 240109_at   | -0.05417949 | -1.75113015 | 0.085159351 | 0.192715668 |
| 240110_at   | -0.01540604 | -0.36065952 | 0.719651595 | 0.835838525 |
| 240111_at   | 0.354999878 | 5.633997956 | 5.29E-07    | 9.50E-06    |
| 240112_at   | 0.128933908 | 3.083971209 | 0.003114349 | 0.013257983 |
| 240113_at   | 0.367945326 | 6.22170921  | 5.67E-08    | 1.62E-06    |
| 240114_s_at | -0.04728646 | -1.63485616 | 0.107443437 | 0.22986415  |
| 240115_at   | -0.06273557 | -2.08149413 | 0.041769253 | 0.110635421 |
| 240116_at   | -0.0068284  | -0.13624323 | 0.892096241 | 0.942231196 |
| 240117_at   | -0.00675442 | -0.20824933 | 0.835756827 | 0.909330123 |
| 240118_at   | -0.00226539 | -0.08828399 | 0.929952156 | 0.963497351 |
| 240119_at   | -0.04334004 | -0.96362453 | 0.339196268 | 0.522070448 |
| 240120_at   | -0.22388359 | -3.61470095 | 0.000626361 | 0.003462381 |

|             |             |             |             |             |
|-------------|-------------|-------------|-------------|-------------|
| 240121_x_at | -0.06285096 | -1.24116291 | 0.219494009 | 0.38634265  |
| 240122_at   | -0.09615275 | -2.96111765 | 0.004421282 | 0.017827132 |
| 240123_at   | -0.05990125 | -1.88375354 | 0.064565814 | 0.155808604 |
| 240124_at   | -0.04308484 | -1.65392866 | 0.103492652 | 0.223409641 |
| 240125_at   | 0.34676397  | 5.092305035 | 3.94E-06    | 4.96E-05    |
| 240126_x_at | 0.056090671 | 1.609018527 | 0.11299008  | 0.238601051 |
| 240127_at   | -0.05672612 | -1.56569727 | 0.122807272 | 0.25402678  |
| 240128_at   | 0.077274763 | 1.836911526 | 0.071298729 | 0.168001413 |
| 240129_at   | -0.00061686 | -0.01852112 | 0.985286085 | 0.992995957 |
| 240130_at   | -0.08210649 | -1.7622625  | 0.083243012 | 0.189222149 |
| 240131_at   | 0.048119836 | 1.712853981 | 0.092029331 | 0.204429932 |
| 240132_at   | 0.008316525 | 0.271471715 | 0.78698288  | 0.87841427  |
| 240133_x_at | -0.0148983  | -0.72815231 | 0.46942176  | 0.646176035 |
| 240134_at   | 0.061722699 | 1.850407648 | 0.069300819 | 0.164508005 |
| 240135_x_at | 0.077625951 | 2.008152057 | 0.049246475 | 0.125961395 |
| 240136_at   | -0.12504552 | -3.88733111 | 0.000261023 | 0.001652612 |
| 240137_at   | -0.17559172 | -4.9735854  | 6.08E-06    | 7.07E-05    |
| 240138_at   | -0.26359955 | -3.2702267  | 0.001802719 | 0.008359319 |
| 240139_at   | 0.064631633 | 1.951787883 | 0.055750451 | 0.138954834 |
| 240140_s_at | 0.007623474 | 0.137854182 | 0.890828531 | 0.941603946 |
| 240141_at   | 0.15875438  | 2.149280531 | 0.035755652 | 0.097862183 |
| 240142_at   | 0.089652036 | 2.737265604 | 0.008190544 | 0.029659033 |
| 240143_at   | -0.29869037 | -4.14899012 | 0.000109473 | 0.000794764 |
| 240144_at   | 0.039560628 | 1.144093807 | 0.257239339 | 0.43096227  |
| 240145_at   | -0.63496214 | -4.70870058 | 1.57E-05    | 0.000156368 |
| 240146_at   | 0.309701249 | 4.038828036 | 0.000158343 | 0.001082181 |
| 240147_at   | 0.004640339 | 0.102362157 | 0.918818897 | 0.957132465 |
| 240148_at   | 0.070911107 | 2.156516243 | 0.035160808 | 0.096606839 |
| 240149_at   | -0.02607126 | -0.85131252 | 0.398063267 | 0.58044978  |
| 240150_at   | -0.03799619 | -0.86146566 | 0.392495045 | 0.575278385 |
| 240151_at   | -0.05711809 | -1.21004097 | 0.231124525 | 0.399312558 |
| 240152_at   | 0.114360539 | 3.57594499  | 0.000707463 | 0.003826447 |
| 240153_at   | -0.02179286 | -0.57500204 | 0.567492402 | 0.727111333 |
| 240154_at   | 0.23966407  | 4.977680384 | 5.99E-06    | 6.98E-05    |
| 240155_x_at | 0.101324768 | 1.992765221 | 0.050953774 | 0.129379613 |
| 240156_at   | 0.214180081 | 2.925454913 | 0.004886999 | 0.019360852 |
| 240157_at   | -0.12016838 | -2.31014604 | 0.024422821 | 0.072395351 |
| 240158_at   | 0.059594582 | 2.162173139 | 0.03470181  | 0.095645594 |
| 240159_at   | 0.331800786 | 3.382145068 | 0.001286825 | 0.006299099 |
| 240160_x_at | 0.029032818 | 1.354265558 | 0.180853979 | 0.337222367 |
| 240161_s_at | -0.06298563 | -2.24390775 | 0.028632742 | 0.082048493 |
| 240162_at   | -0.06353685 | -1.77017279 | 0.08190321  | 0.186870444 |
| 240163_at   | -0.04050355 | -1.26291051 | 0.211626383 | 0.376617938 |
| 240164_at   | -0.079931   | -2.73014467 | 0.008348767 | 0.030122151 |
| 240165_at   | -0.55827668 | -6.13676349 | 7.85E-08    | 2.08E-06    |
| 240166_x_at | 0.162775573 | 3.725014172 | 0.000441265 | 0.002575892 |
| 240167_at   | -0.06016064 | -2.74308793 | 0.008063225 | 0.029281033 |
| 240168_at   | 0.103122675 | 2.251344573 | 0.028130078 | 0.080853395 |
| 240169_at   | -0.06592904 | -2.14229686 | 0.036338105 | 0.09918301  |
| 240170_at   | 0.011226295 | 0.259359109 | 0.79626768  | 0.88428923  |
| 240171_at   | -0.00694753 | -0.18282607 | 0.855565919 | 0.920884159 |
| 240172_at   | -0.12722544 | -3.03585056 | 0.003576059 | 0.014901744 |
| 240173_at   | -0.66809421 | -8.71819078 | 3.59E-12    | 3.59E-09    |
| 240174_at   | 0.229392683 | 5.265646528 | 2.09E-06    | 2.94E-05    |
| 240175_at   | 0.056061553 | 1.493419523 | 0.14069559  | 0.280976242 |
| 240176_at   | 0.001152477 | 0.034249069 | 0.972795001 | 0.98625639  |
| 240177_at   | -0.02917317 | -0.73668215 | 0.464256506 | 0.641992381 |
| 240178_at   | -0.06650566 | -1.96203497 | 0.054516127 | 0.136556145 |
| 240179_at   | -0.04859669 | -1.63882241 | 0.106611907 | 0.22836672  |
| 240180_at   | 0.277359026 | 2.874192371 | 0.005636555 | 0.021746281 |
| 240181_at   | 0.004638723 | 0.130122165 | 0.896915676 | 0.94468844  |
| 240182_at   | 0.077100879 | 1.601835436 | 0.114572559 | 0.241179257 |
| 240183_at   | -0.01168065 | -0.32387546 | 0.747186113 | 0.854068948 |
| 240184_at   | -0.05395716 | -1.43644491 | 0.156196315 | 0.302851442 |
| 240185_at   | -0.00888938 | -0.29639887 | 0.767974042 | 0.867079483 |
| 240186_at   | 0.211179468 | 2.934625305 | 0.00476308  | 0.018950552 |
| 240187_at   | 0.037596407 | 0.813119528 | 0.419442856 | 0.601673518 |
| 240188_at   | 0.122951505 | 2.546258252 | 0.013539476 | 0.044670386 |
| 240189_at   | -0.00977885 | -0.35795544 | 0.721663577 | 0.837294615 |
| 240190_at   | -0.03068727 | -0.92001917 | 0.361336773 | 0.544466051 |
| 240191_at   | -0.02139914 | -0.78950495 | 0.43300173  | 0.613855323 |
| 240192_at   | -0.04398414 | -1.52594121 | 0.132407149 | 0.268774119 |
| 240193_at   | 0.002484531 | 0.075316724 | 0.940219398 | 0.968722718 |
| 240194_at   | -0.05657647 | -2.58867783 | 0.01213273  | 0.040852554 |
| 240195_at   | -0.04533997 | -1.04667293 | 0.29955105  | 0.478861664 |

|             |             |             |             |             |
|-------------|-------------|-------------|-------------|-------------|
| 240196_at   | 0.017707592 | 0.612249469 | 0.542742562 | 0.707426814 |
| 240197_at   | -0.0912946  | -2.21324961 | 0.030789688 | 0.086877501 |
| 240198_at   | 0.003590268 | 0.129344803 | 0.897528016 | 0.94504234  |
| 240199_x_at | -0.00427338 | -0.11845792 | 0.906110201 | 0.950228244 |
| 240200_at   | -0.02458318 | -0.70117074 | 0.485973229 | 0.660741522 |
| 240201_at   | -0.02872449 | -0.79465327 | 0.430023717 | 0.610910072 |
| 240202_x_at | -0.0226739  | -0.629573   | 0.531422412 | 0.698536686 |
| 240203_at   | -0.01075329 | -0.35137062 | 0.726571289 | 0.840375593 |
| 240204_at   | -0.22787379 | -4.33694341 | 5.77E-05    | 0.000464176 |
| 240205_x_at | 0.199013283 | 3.869149949 | 0.000276987 | 0.001738853 |
| 240206_at   | 0.068626502 | 2.250037214 | 0.028217875 | 0.081058828 |
| 240207_at   | 0.001614234 | 0.042698382 | 0.96608721  | 0.982732587 |
| 240208_at   | 0.006480133 | 0.198491774 | 0.843347747 | 0.913918128 |
| 240209_at   | -0.047035   | -1.23279182 | 0.22257915  | 0.389655191 |
| 240210_at   | 0.06614172  | 1.377863118 | 0.173487705 | 0.327207652 |
| 240211_at   | 0.034962597 | 1.200663736 | 0.23471542  | 0.403554012 |
| 240212_at   | -0.00216802 | -0.07471697 | 0.940694534 | 0.969078213 |
| 240213_at   | 0.078593682 | 1.973180036 | 0.053200255 | 0.133887648 |
| 240214_at   | -0.15657998 | -3.61992068 | 0.000616141 | 0.003413705 |
| 240215_at   | 0.006993339 | 0.168395136 | 0.866852639 | 0.927892751 |
| 240216_at   | 0.383336236 | 6.587009038 | 1.39E-08    | 5.71E-07    |
| 240217_s_at | -0.05058037 | -1.95555783 | 0.055293588 | 0.138062519 |
| 240218_at   | -0.03655737 | -1.00808733 | 0.317559451 | 0.498923117 |
| 240219_at   | 0.058289255 | 1.785880053 | 0.07929596  | 0.182360374 |
| 240220_at   | 0.026580477 | 0.680504069 | 0.498866874 | 0.671848347 |
| 240221_at   | 0.102261128 | 2.245649498 | 0.028514308 | 0.081789453 |
| 240222_at   | -0.06628945 | -2.10040548 | 0.040008989 | 0.106870669 |
| 240223_at   | -0.01447564 | -0.37860259 | 0.706352004 | 0.826901368 |
| 240224_at   | 0.022717249 | 0.567157373 | 0.572774809 | 0.730888816 |
| 240225_at   | -0.00891362 | -0.28719908 | 0.774973609 | 0.871065937 |
| 240226_at   | -0.03585671 | -1.2127149  | 0.230107948 | 0.398050679 |
| 240227_at   | -0.04399047 | -1.22642477 | 0.224946941 | 0.392195699 |
| 240228_at   | -0.11371679 | -2.12967488 | 0.03741187  | 0.10142007  |
| 240229_at   | 0.031894238 | 1.072813969 | 0.28775527  | 0.465950312 |
| 240230_s_at | 0.1684923   | 5.013411125 | 5.26E-06    | 6.27E-05    |
| 240231_at   | 0.200246728 | 3.584272242 | 0.000689235 | 0.003748726 |
| 240232_at   | -0.02048808 | -0.58043136 | 0.563850496 | 0.724388452 |
| 240233_at   | -0.02203573 | -0.81828796 | 0.416509787 | 0.598792274 |
| 240234_at   | 0.048582648 | 1.267055108 | 0.210151005 | 0.374798225 |
| 240235_at   | -0.00092065 | -0.03734881 | 0.970333902 | 0.984986202 |
| 240236_at   | -0.74009725 | -6.94999637 | 3.40E-09    | 2.11E-07    |
| 240237_at   | -0.0136433  | -0.50998931 | 0.611975593 | 0.760621092 |
| 240238_at   | 0.117991084 | 3.441894682 | 0.001072139 | 0.005398384 |
| 240239_at   | 0.062459568 | 1.077438417 | 0.285702467 | 0.46352106  |
| 240240_at   | 0.12570007  | 2.820888575 | 0.00652768  | 0.024565945 |
| 240241_at   | 0.070803284 | 2.10383495  | 0.039696783 | 0.106247971 |
| 240242_at   | 0.461437889 | 6.037702858 | 1.15E-07    | 2.81E-06    |
| 240243_at   | 0.024310423 | 0.91629244  | 0.363271226 | 0.546349361 |
| 240244_at   | -0.02168955 | -0.69950154 | 0.487007712 | 0.66148723  |
| 240245_at   | 0.162227299 | 3.535879066 | 0.000801775 | 0.004237218 |
| 240246_at   | -0.05130219 | -0.83886188 | 0.404957764 | 0.5873044   |
| 240247_at   | 0.232892937 | 4.28376799  | 6.93E-05    | 0.000540613 |
| 240248_at   | 0.088626283 | 2.774971188 | 0.007397684 | 0.02725392  |
| 240249_at   | -0.00247664 | -0.07039429 | 0.944119658 | 0.971186703 |
| 240250_at   | 0.007504637 | 0.204125277 | 0.838963276 | 0.911088758 |
| 240251_at   | 0.030427468 | 0.889838171 | 0.377193476 | 0.559883451 |
| 240252_at   | -0.03996428 | -1.15269309 | 0.253719566 | 0.426752281 |
| 240253_at   | 0.013976976 | 0.469841652 | 0.640212929 | 0.781332501 |
| 240254_at   | 0.331894448 | 3.524940809 | 0.000829533 | 0.004362099 |
| 240255_at   | 0.020081381 | 0.572494965 | 0.569178    | 0.728102103 |
| 240256_at   | 0.090982978 | 2.384166361 | 0.020377205 | 0.062520533 |
| 240257_at   | 0.103550822 | 1.702127152 | 0.094034579 | 0.207771465 |
| 240258_at   | -0.08986605 | -2.44766927 | 0.017395981 | 0.055010343 |
| 240259_at   | 0.037718707 | 0.60210125  | 0.549430764 | 0.712590607 |
| 240260_at   | 0.04771741  | 1.711244221 | 0.09232799  | 0.204932829 |
| 240261_at   | -0.09171393 | -4.25148135 | 7.73E-05    | 0.000594263 |
| 240262_at   | 0.204815974 | 3.562294807 | 0.00073834  | 0.003969909 |
| 240263_at   | 0.194548135 | 3.555325663 | 0.000754595 | 0.004043204 |
| 240264_at   | 0.008732198 | 0.249126937 | 0.804134229 | 0.889671684 |
| 240265_at   | -0.06865379 | -1.98753009 | 0.051546135 | 0.13059523  |
| 240266_at   | -0.01184686 | -0.4499729  | 0.654391137 | 0.790564828 |
| 240267_at   | -0.03163884 | -1.09222528 | 0.279206784 | 0.456123711 |
| 240268_at   | -0.0010687  | -0.03732599 | 0.97035202  | 0.984986202 |
| 240269_at   | -0.0210034  | -0.71823137 | 0.475470184 | 0.651392112 |
| 240270_x_at | -0.01976706 | -0.67582015 | 0.501814821 | 0.674059842 |



|             |             |             |             |             |
|-------------|-------------|-------------|-------------|-------------|
| 240271_at   | 0.272864507 | 4.092507563 | 0.000132355 | 0.000934128 |
| 240272_at   | 0.036844593 | 1.027249666 | 0.308526998 | 0.489029954 |
| 240273_at   | -0.01394516 | -0.58303934 | 0.562105214 | 0.723152832 |
| 240274_at   | -0.02315035 | -0.80989012 | 0.421281847 | 0.603214157 |
| 240275_at   | 0.318913592 | 2.558065717 | 0.013133755 | 0.043566673 |
| 240276_at   | -0.01978525 | -0.60631226 | 0.546650435 | 0.710463632 |
| 240277_at   | -0.04295166 | -1.31296826 | 0.194315088 | 0.35434674  |
| 240278_at   | 0.069934223 | 2.203326133 | 0.031517878 | 0.088585436 |
| 240279_at   | 0.218430996 | 5.401395062 | 1.26E-06    | 1.93E-05    |
| 240280_at   | 0.030081876 | 1.0586982   | 0.294084313 | 0.472726544 |
| 240281_at   | 0.033486221 | 0.941444329 | 0.350344373 | 0.533465391 |
| 240282_at   | 0.120782461 | 2.736606647 | 0.008205069 | 0.02970441  |
| 240283_at   | -0.07705235 | -1.92196212 | 0.05947986  | 0.146015257 |
| 240284_x_at | -0.0776296  | -1.89824655 | 0.06259487  | 0.152062288 |
| 240285_at   | 0.023499821 | 0.88632988  | 0.379064837 | 0.561728362 |
| 240286_at   | 0.051017115 | 1.354691237 | 0.18071902  | 0.337020423 |
| 240287_at   | -0.07240874 | -2.14297937 | 0.036280819 | 0.099081109 |
| 240288_at   | -0.01721815 | -0.57419135 | 0.56803719  | 0.727445574 |
| 240289_at   | 0.023230849 | 0.711403422 | 0.479658282 | 0.655041495 |
| 240290_at   | 0.002271308 | 0.071905362 | 0.942922219 | 0.970545366 |
| 240291_at   | 0.018516646 | 0.575295579 | 0.567295204 | 0.727004566 |
| 240292_x_at | -0.3744582  | -4.02135443 | 0.000167818 | 0.00113552  |
| 240293_at   | 0.225551338 | 3.049110204 | 0.003442834 | 0.014442194 |
| 240294_at   | 0.023278598 | 0.876714036 | 0.384224006 | 0.566836314 |
| 240295_at   | 0.050235947 | 1.308679189 | 0.195755292 | 0.356289779 |
| 240296_at   | 0.238901725 | 4.704589385 | 1.60E-05    | 0.000158508 |
| 240297_at   | 0.049484187 | 0.959104611 | 0.341448907 | 0.524345757 |
| 240298_at   | -0.03318673 | -0.92064214 | 0.36101405  | 0.544108182 |
| 240299_at   | 0.069096082 | 2.051190228 | 0.044730164 | 0.116953167 |
| 240300_at   | 0.04758372  | 1.511138097 | 0.13613048  | 0.274298621 |
| 240301_at   | 0.011963314 | 0.385626431 | 0.701170532 | 0.823501785 |
| 240302_at   | 0.108011575 | 2.916945611 | 0.005004655 | 0.019735995 |
| 240303_at   | 0.047747711 | 1.445348547 | 0.153689858 | 0.299397327 |
| 240304_s_at | 0.031406974 | 0.831622282 | 0.409000133 | 0.591171861 |
| 240305_at   | 0.268146091 | 3.884762617 | 0.000263223 | 0.001663926 |
| 240306_at   | 0.027775039 | 0.639376115 | 0.525071349 | 0.693515641 |
| 240307_at   | 0.352179334 | 5.090007247 | 3.98E-06    | 4.99E-05    |
| 240308_at   | -0.027493   | -0.92023956 | 0.36122258  | 0.544312335 |
| 240309_at   | 0.015571698 | 0.53310032  | 0.595981383 | 0.748701972 |
| 240310_at   | 0.076676271 | 1.4520252   | 0.151830981 | 0.296845779 |
| 240311_at   | 0.015547627 | 0.569156351 | 0.571426474 | 0.729829447 |
| 240312_at   | -0.39310463 | -5.7629602  | 3.25E-07    | 6.39E-06    |
| 240313_at   | 0.007393952 | 0.186678858 | 0.85255759  | 0.919069622 |
| 240314_at   | 0.340079078 | 4.667625383 | 1.82E-05    | 0.000176161 |
| 240315_at   | 0.104085181 | 1.510625797 | 0.136260805 | 0.274499342 |
| 240316_at   | -0.02429519 | -0.83366924 | 0.407854684 | 0.590076632 |
| 240317_at   | 0.121127657 | 1.974756392 | 0.053016353 | 0.133510275 |
| 240318_at   | 0.076528145 | 2.564013255 | 0.012933594 | 0.043011248 |
| 240319_at   | 0.035687691 | 0.957922115 | 0.342039858 | 0.524971361 |
| 240320_at   | -0.08985464 | -2.91987535 | 0.004963853 | 0.019607965 |
| 240321_at   | 0.092916968 | 2.823252397 | 0.006485554 | 0.024431254 |
| 240322_at   | -0.02262054 | -0.66306025 | 0.509893358 | 0.6807921   |
| 240323_at   | -0.07032094 | -1.609928   | 0.112790983 | 0.23832701  |
| 240324_at   | 0.049984535 | 1.622972216 | 0.109966511 | 0.233884896 |
| 240325_x_at | 0.041294749 | 1.068523707 | 0.289668834 | 0.467917719 |
| 240326_at   | -0.00550115 | -0.10593493 | 0.915995991 | 0.955349766 |
| 240327_at   | -0.04356488 | -1.34411478 | 0.184095008 | 0.341332684 |
| 240328_at   | 0.110379667 | 2.537102262 | 0.01386187  | 0.045536543 |
| 240329_at   | -0.05470441 | -1.56133617 | 0.123832327 | 0.255650146 |
| 240330_at   | -0.01682835 | -0.46004285 | 0.647188879 | 0.786004114 |
| 240331_at   | 0.152429341 | 4.04053746  | 0.000157444 | 0.001076739 |
| 240332_at   | 0.025056729 | 0.983229846 | 0.329538839 | 0.511984628 |
| 240333_at   | -0.07358869 | -2.49241186 | 0.01553744  | 0.050064837 |
| 240334_at   | -0.00937188 | -0.31364254 | 0.754906932 | 0.859136761 |
| 240335_at   | 0.013565521 | 0.532204549 | 0.596597657 | 0.74911415  |
| 240336_at   | -0.01905397 | -0.61193679 | 0.542948014 | 0.707576742 |
| 240337_at   | -0.03826285 | -0.95778951 | 0.342106167 | 0.52504838  |
| 240338_at   | -0.00184097 | -0.0458041  | 0.963622218 | 0.981323057 |
| 240339_at   | 0.246314595 | 5.507192847 | 8.51E-07    | 1.40E-05    |
| 240340_at   | 0.049081527 | 1.357238937 | 0.179912889 | 0.335951652 |
| 240341_at   | -0.04691245 | -1.93374318 | 0.057982118 | 0.14316778  |
| 240342_at   | 0.017289081 | 0.541554101 | 0.590180052 | 0.744285917 |
| 240343_at   | -0.00879478 | -0.22501789 | 0.822748646 | 0.901541766 |
| 240344_x_at | 0.107020473 | 1.913617929 | 0.060560479 | 0.148142799 |
| 240345_x_at | -0.03853129 | -1.05906083 | 0.29392053  | 0.472501117 |

|             |             |             |             |             |
|-------------|-------------|-------------|-------------|-------------|
| 240346_at   | 0.035810879 | 0.921609386 | 0.36051335  | 0.543706509 |
| 240347_at   | -0.02406395 | -0.80603496 | 0.423483511 | 0.605100233 |
| 240348_at   | -0.0821445  | -2.44175921 | 0.01765588  | 0.05566678  |
| 240349_at   | -0.01222201 | -0.3481057  | 0.729008947 | 0.84188289  |
| 240350_at   | 0.098814909 | 2.782005838 | 0.007257817 | 0.026832583 |
| 240351_at   | 0.071584158 | 0.821697825 | 0.41458151  | 0.59682644  |
| 240352_at   | 0.074244935 | 2.427557388 | 0.018294744 | 0.057317118 |
| 240353_s_at | 0.084265783 | 2.657655134 | 0.010126578 | 0.035244685 |
| 240354_at   | -0.02372843 | -0.75891716 | 0.450945753 | 0.630314243 |
| 240355_at   | 0.017940346 | 0.63090016  | 0.530560265 | 0.697734209 |
| 240356_s_at | 0.013791322 | 0.507140344 | 0.61396067  | 0.762092217 |
| 240357_at   | 0.047658236 | 1.387036688 | 0.170686945 | 0.323344394 |
| 240358_at   | -0.04488321 | -1.06635176 | 0.290640922 | 0.46899077  |
| 240359_at   | -0.04236589 | -1.22018081 | 0.227286833 | 0.394849691 |
| 240360_at   | 0.003641052 | 0.119299286 | 0.90544653  | 0.949911181 |
| 240361_at   | 0.018903367 | 0.571662895 | 0.569737973 | 0.728525251 |
| 240362_at   | 0.031090073 | 0.872158334 | 0.386683582 | 0.569393518 |
| 240363_at   | 0.004501896 | 0.122476863 | 0.90294068  | 0.948403778 |
| 240364_at   | -0.00488592 | -0.2181921  | 0.828037935 | 0.904492447 |
| 240365_at   | -0.01596799 | -0.72505635 | 0.47130455  | 0.647690506 |
| 240366_at   | 0.02090541  | 0.559259775 | 0.578116928 | 0.735055526 |
| 240367_at   | 0.078521885 | 2.453708102 | 0.017133977 | 0.054316077 |
| 240368_at   | 0.036571544 | 0.87096547  | 0.387329221 | 0.569966147 |
| 240369_at   | 0.097936766 | 2.670350289 | 0.009792166 | 0.034310583 |
| 240370_at   | 0.172251409 | 3.743906764 | 0.000415348 | 0.002448583 |
| 240371_at   | -0.06648237 | -1.6941557  | 0.095547906 | 0.210211038 |
| 240372_at   | -0.01013485 | -0.25563155 | 0.799131032 | 0.886224093 |
| 240373_at   | 0.025542374 | 0.519199856 | 0.605577974 | 0.755532992 |
| 240374_at   | -0.01074617 | -0.27543273 | 0.783953257 | 0.876634198 |
| 240375_at   | -0.10237979 | -2.42409733 | 0.018453505 | 0.057717407 |
| 240376_s_at | 0.09707174  | 1.845104606 | 0.070080164 | 0.165864676 |
| 240377_at   | 0.023203095 | 0.734669149 | 0.465472548 | 0.643181319 |
| 240378_at   | -0.05967359 | -2.22550911 | 0.029910567 | 0.084938561 |
| 240379_at   | 0.058150549 | 0.873211678 | 0.386114018 | 0.568798461 |
| 240380_at   | -0.05503947 | -1.20583071 | 0.232731808 | 0.401313757 |
| 240381_at   | -0.06770432 | -1.88617782 | 0.064232515 | 0.155189203 |
| 240382_at   | 0.005716994 | 0.211717514 | 0.833062479 | 0.907648637 |
| 240383_at   | 0.504969419 | 4.230671905 | 8.30E-05    | 0.000630028 |
| 240384_at   | -0.09053857 | -1.70263519 | 0.093938804 | 0.207626987 |
| 240385_at   | -0.02402408 | -0.60483855 | 0.54762264  | 0.711108644 |
| 240386_at   | -0.03971167 | -1.50087997 | 0.138758929 | 0.278252527 |
| 240387_at   | 0.013409566 | 0.317068405 | 0.752319246 | 0.85737076  |
| 240388_at   | -0.09156621 | -2.70354792 | 0.008964843 | 0.031922299 |
| 240389_at   | 0.024902774 | 0.778017147 | 0.43969074  | 0.62020763  |
| 240390_at   | -0.00519459 | -0.21757633 | 0.828515488 | 0.904821597 |
| 240391_at   | -0.06774077 | -1.63970753 | 0.106427057 | 0.22807183  |
| 240392_at   | 0.080925121 | 1.217768441 | 0.228195608 | 0.395681066 |
| 240393_at   | -0.0337551  | -1.02299338 | 0.310518056 | 0.491210285 |
| 240394_at   | 0.042158349 | 1.215985804 | 0.228868857 | 0.396510271 |
| 240395_at   | -0.7022406  | -4.79337458 | 1.16E-05    | 0.000120914 |
| 240396_at   | 0.079729618 | 1.570832204 | 0.121609056 | 0.252089779 |
| 240397_x_at | 0.059719184 | 1.727371219 | 0.089371756 | 0.199920042 |
| 240398_at   | -0.08699587 | -2.6422772  | 0.010545612 | 0.036402601 |
| 240399_at   | 0.029467178 | 0.989936968 | 0.326277313 | 0.508455165 |
| 240400_at   | 0.023043161 | 0.649785412 | 0.518371442 | 0.687837549 |
| 240401_at   | -0.03589847 | -1.08914996 | 0.28054918  | 0.45771927  |
| 240402_at   | -0.23371731 | -3.57939611 | 0.000699853 | 0.003794934 |
| 240403_at   | -0.01110856 | -0.24903873 | 0.804202136 | 0.889704727 |
| 240404_at   | 0.026475229 | 0.931081768 | 0.35563356  | 0.538687512 |
| 240405_at   | -0.06019959 | -1.07835986 | 0.285294651 | 0.463086833 |
| 240406_at   | 0.01162163  | 0.366357491 | 0.715418524 | 0.833163558 |
| 240407_at   | -0.06422491 | -1.73519715 | 0.087965615 | 0.197615325 |
| 240408_at   | 0.033588066 | 1.175755053 | 0.244450262 | 0.415556147 |
| 240409_at   | -0.09430579 | -2.99740602 | 0.003990007 | 0.016362761 |
| 240410_at   | -0.05930319 | -2.22994935 | 0.029597664 | 0.084210516 |
| 240411_at   | 0.019522119 | 0.373538365 | 0.710096566 | 0.829689823 |
| 240412_s_at | -0.07573339 | -1.57042624 | 0.121703444 | 0.252201498 |
| 240413_at   | -0.04801766 | -2.03580489 | 0.046301747 | 0.120169436 |
| 240414_at   | -0.06714678 | -1.73903825 | 0.087282182 | 0.196415673 |
| 240415_at   | -0.0098915  | -0.45793221 | 0.648695681 | 0.786878181 |
| 240416_at   | -0.01008154 | -0.32080228 | 0.749502164 | 0.855578419 |
| 240417_at   | 0.033358082 | 0.742508845 | 0.460746879 | 0.639116655 |
| 240418_at   | -0.0375086  | -1.32724879 | 0.189577387 | 0.34824626  |
| 240419_at   | 0.10207347  | 1.451845984 | 0.151880647 | 0.296905339 |
| 240420_at   | -0.06713365 | -2.15215427 | 0.035518357 | 0.097379696 |

|             |             |             |             |             |
|-------------|-------------|-------------|-------------|-------------|
| 240421_x_at | 0.069525409 | 2.178026017 | 0.033443371 | 0.092844411 |
| 240422_at   | 0.028348336 | 0.918168932 | 0.362296355 | 0.545534418 |
| 240423_at   | -0.05920363 | -1.35151047 | 0.18172932  | 0.3383257   |
| 240424_s_at | -0.00020861 | -0.00691831 | 0.99450354  | 0.997389312 |
| 240425_x_at | -0.14337982 | -3.59604723 | 0.000664222 | 0.003634802 |
| 240426_at   | 0.011477832 | 0.396738069 | 0.693002629 | 0.817876589 |
| 240427_at   | -0.06085115 | -1.70880783 | 0.092781532 | 0.205663735 |
| 240428_at   | 0.016985087 | 0.510161995 | 0.611855364 | 0.760556264 |
| 240429_at   | -0.04673406 | -1.59156712 | 0.116865747 | 0.244772892 |
| 240430_at   | -0.02426655 | -0.5427221  | 0.589380626 | 0.74389559  |
| 240431_at   | 0.012053679 | 0.351775439 | 0.726269239 | 0.840173552 |
| 240432_x_at | 0.343162728 | 7.777172201 | 1.36E-10    | 2.58E-08    |
| 240433_x_at | -0.1424863  | -1.4759248  | 0.145320655 | 0.287565672 |
| 240434_at   | -0.0387568  | -0.92027654 | 0.361203423 | 0.544301821 |
| 240435_at   | -0.01360206 | -0.33883955 | 0.735942494 | 0.846449341 |
| 240436_at   | 0.01113751  | 0.272229949 | 0.78640268  | 0.878198853 |
| 240437_at   | -0.01995397 | -0.90370432 | 0.369854444 | 0.553029316 |
| 240438_at   | 0.045003207 | 1.25867154  | 0.213143281 | 0.378488531 |
| 240439_at   | 0.036279638 | 1.015461812 | 0.314062541 | 0.495169798 |
| 240440_at   | 0.882387128 | 7.861897468 | 9.82E-11    | 2.10E-08    |
| 240441_at   | 0.033162411 | 0.757563103 | 0.451749955 | 0.631111293 |
| 240442_at   | 0.003582356 | 0.19312529  | 0.84752904  | 0.916227664 |
| 240443_at   | -0.08630637 | -2.55341717 | 0.013292151 | 0.044000653 |
| 240444_x_at | -0.00786958 | -0.30215041 | 0.763607831 | 0.864000638 |
| 240445_at   | 0.034057722 | 0.899729472 | 0.371948877 | 0.555159443 |
| 240446_at   | 0.059506899 | 2.155393756 | 0.035252516 | 0.096775517 |
| 240447_at   | -0.0189998  | -0.85129049 | 0.3980754   | 0.58044978  |
| 240448_at   | -0.04918473 | -1.71709311 | 0.091246652 | 0.203087419 |
| 240449_at   | -0.04624814 | -1.16236588 | 0.249801651 | 0.422203387 |
| 240450_at   | -0.09971668 | -2.39920093 | 0.01963278  | 0.060671291 |
| 240451_at   | 0.102176813 | 2.754392467 | 0.007821202 | 0.028545949 |
| 240452_at   | 0.157691829 | 2.186809581 | 0.032763496 | 0.091379566 |
| 240453_at   | 0.014209413 | 0.24548906  | 0.806936004 | 0.891358846 |
| 240454_at   | -0.00405123 | -0.12689379 | 0.899459129 | 0.946244733 |
| 240455_at   | 0.026902536 | 0.61696337  | 0.539650072 | 0.705370876 |
| 240456_at   | -0.02429753 | -0.62074188 | 0.537177779 | 0.703264478 |
| 240457_at   | 0.105468039 | 2.953585124 | 0.004516071 | 0.018151815 |
| 240458_at   | 0.458167715 | 5.813135473 | 2.69E-07    | 5.46E-06    |
| 240459_at   | -0.07305903 | -1.85774911 | 0.068233965 | 0.16256263  |
| 240460_at   | 0.126041289 | 2.936643727 | 0.004736199 | 0.018865438 |
| 240461_at   | -0.02070886 | -0.55679711 | 0.579787633 | 0.736404607 |
| 240462_at   | -0.01953678 | -0.64552678 | 0.52110701  | 0.689992429 |
| 240463_at   | 0.009930845 | 0.429463506 | 0.669161818 | 0.800690804 |
| 240464_at   | -0.00211106 | -0.05500619 | 0.956320749 | 0.977559683 |
| 240465_at   | 0.007081859 | 0.181012595 | 0.856982658 | 0.921898398 |
| 240466_at   | -0.03379341 | -0.42874338 | 0.669682882 | 0.801067056 |
| 240467_at   | 0.029294384 | 0.952048624 | 0.344985064 | 0.527889631 |
| 240468_at   | 0.100120027 | 2.527324635 | 0.014213815 | 0.046435951 |
| 240469_at   | -0.029607   | -0.96172573 | 0.3401414   | 0.522984809 |
| 240470_at   | 0.019128585 | 0.536440303 | 0.593686164 | 0.746904122 |
| 240471_at   | -0.01601674 | -0.41023799 | 0.683128273 | 0.810533591 |
| 240472_at   | 0.029474367 | 1.242290373 | 0.219080902 | 0.385858667 |
| 240473_at   | -0.06559293 | -1.58320484 | 0.118760458 | 0.247636454 |
| 240474_x_at | -0.04107754 | -1.49491498 | 0.140305685 | 0.280467261 |
| 240475_at   | -0.09931599 | -2.83011635 | 0.006364651 | 0.02405488  |
| 240476_at   | -0.06143384 | -1.6805195  | 0.098182986 | 0.214603316 |
| 240477_at   | -0.01335649 | -0.48056766 | 0.632614119 | 0.775839815 |
| 240478_at   | 0.134342863 | 3.213089415 | 0.002136028 | 0.009630118 |
| 240479_at   | -0.56762577 | -5.93137638 | 1.72E-07    | 3.84E-06    |
| 240480_at   | -0.05693665 | -2.66918728 | 0.009822376 | 0.034397559 |
| 240481_at   | 0.031131818 | 0.920422569 | 0.361127775 | 0.544224525 |
| 240482_at   | 0.010294082 | 0.306290952 | 0.760469356 | 0.862124164 |
| 240483_at   | 0.000866955 | 0.026493396 | 0.978953869 | 0.989336009 |
| 240484_at   | -0.03849882 | -1.26021007 | 0.212591796 | 0.377746912 |
| 240485_at   | 0.008042488 | 0.237072091 | 0.813428174 | 0.895279809 |
| 240486_at   | 0.045292079 | 1.135108357 | 0.260954163 | 0.435257135 |
| 240487_at   | -0.00771142 | -0.2785999  | 0.781533227 | 0.875154293 |
| 240488_at   | -0.02706033 | -0.75299721 | 0.454467865 | 0.63361236  |
| 240489_at   | -0.035155   | -0.81150884 | 0.420359455 | 0.602408285 |
| 240490_at   | -0.03794062 | -1.00234047 | 0.320302643 | 0.502032886 |
| 240491_at   | -0.04481355 | -1.7671803  | 0.082407937 | 0.187744075 |
| 240492_at   | -0.09617987 | -2.87075862 | 0.005690384 | 0.021918006 |
| 240493_at   | -0.02373663 | -0.60605365 | 0.546820977 | 0.710587436 |
| 240494_at   | 0.019548127 | 0.640592139 | 0.52428632  | 0.692847341 |
| 240495_at   | -0.06948813 | -1.86169543 | 0.067666237 | 0.161580437 |

|             |             |             |             |             |
|-------------|-------------|-------------|-------------|-------------|
| 240496_at   | 0.074718245 | 1.770208841 | 0.081897145 | 0.186866146 |
| 240497_at   | 0.028056899 | 0.806355873 | 0.423299975 | 0.604989425 |
| 240498_at   | 0.14668117  | 2.670554099 | 0.009786881 | 0.034297441 |
| 240499_at   | 0.077237455 | 1.402853077 | 0.165939852 | 0.316876767 |
| 240500_at   | 0.013200775 | 0.3403825   | 0.734786403 | 0.845605097 |
| 240501_at   | -0.05115612 | -1.4598782  | 0.14966712  | 0.293721642 |
| 240502_at   | 0.203056203 | 2.60560908  | 0.011609347 | 0.03939597  |
| 240503_at   | -0.06895355 | -2.54236217 | 0.013675822 | 0.04502393  |
| 240504_at   | 0.018674987 | 0.720244335 | 0.474239421 | 0.650284055 |
| 240505_at   | -0.03216294 | -1.226457   | 0.22493491  | 0.392195699 |
| 240506_at   | -0.0083686  | -0.24778718 | 0.805165772 | 0.890285971 |
| 240507_at   | -0.02351272 | -0.58941881 | 0.557847345 | 0.719705218 |
| 240508_at   | -0.0054758  | -0.14044739 | 0.888788449 | 0.940404209 |
| 240509_s_at | -0.25477861 | -4.456696   | 3.82E-05    | 0.00032956  |
| 240510_at   | 0.011678703 | 0.392845599 | 0.695859789 | 0.819936347 |
| 240511_at   | -0.00034182 | -0.00870377 | 0.993085067 | 0.996975071 |
| 240512_x_at | -0.51418465 | -3.92865483 | 0.000227962 | 0.001474609 |
| 240513_at   | -0.01637019 | -0.54113263 | 0.590468648 | 0.74453292  |
| 240514_at   | 0.052608169 | 1.263919039 | 0.211266664 | 0.376187487 |
| 240515_at   | -0.03590843 | -1.4380564  | 0.155740323 | 0.302255798 |
| 240516_at   | 0.108087683 | 3.354821052 | 0.001398026 | 0.006754659 |
| 240517_at   | 0.039578918 | 0.981387689 | 0.330438419 | 0.512972102 |
| 240518_at   | -0.02326831 | -0.71529932 | 0.477266108 | 0.652931826 |
| 240519_at   | -0.04033013 | -1.28156643 | 0.205045503 | 0.368249693 |
| 240520_at   | -0.02438754 | -0.70034227 | 0.486486519 | 0.661033581 |
| 240521_at   | 0.238945997 | 4.030935916 | 0.000162556 | 0.001106285 |
| 240522_at   | -0.02502303 | -0.82091552 | 0.415023425 | 0.597250996 |
| 240523_at   | -0.0925239  | -2.51302357 | 0.014743152 | 0.047885243 |
| 240524_x_at | -0.00725242 | -0.22306247 | 0.824263062 | 0.902391183 |
| 240525_at   | 0.049764907 | 1.392223456 | 0.169118833 | 0.321245277 |
| 240526_at   | 0.046588874 | 1.487737264 | 0.142184904 | 0.283115515 |
| 240527_at   | -0.06669147 | -1.95570567 | 0.055275738 | 0.138041085 |
| 240528_s_at | -0.13795567 | -2.93488869 | 0.004759564 | 0.018938251 |
| 240529_at   | 0.077768614 | 1.951619998 | 0.055770871 | 0.138990227 |
| 240530_at   | -0.02186442 | -0.62478881 | 0.534536355 | 0.701154885 |
| 240531_at   | -0.0118058  | -0.42325569 | 0.673658983 | 0.803810397 |
| 240532_at   | -1.08440171 | -6.58284385 | 1.41E-08    | 5.77E-07    |
| 240533_at   | -0.06295396 | -2.21302516 | 0.030805994 | 0.086901563 |
| 240534_at   | -0.06833675 | -1.67798951 | 0.098678376 | 0.215380639 |
| 240535_at   | 0.148374559 | 4.572151451 | 2.55E-05    | 0.000234284 |
| 240536_at   | -0.02642785 | -0.91450763 | 0.364200027 | 0.547451487 |
| 240537_s_at | -0.0130136  | -0.33931697 | 0.735584708 | 0.846240522 |
| 240538_at   | 0.093936944 | 2.197959686 | 0.031917949 | 0.089507247 |
| 240539_at   | 0.033382785 | 0.783555941 | 0.436458096 | 0.616991467 |
| 240540_at   | -0.05114208 | -1.41439919 | 0.162539233 | 0.311914767 |
| 240541_at   | 0.010468979 | 0.207835684 | 0.836078311 | 0.909547049 |
| 240542_at   | 0.0203646   | 0.828840987 | 0.410559651 | 0.592755029 |
| 240543_at   | 0.07475074  | 2.372947132 | 0.020949065 | 0.063951887 |
| 240544_at   | 0.086015084 | 2.963168944 | 0.004395791 | 0.017738753 |
| 240545_at   | 0.230113919 | 4.111471032 | 0.0001242   | 0.000886137 |
| 240546_at   | -0.01331528 | -0.37398318 | 0.70976737  | 0.829435292 |
| 240547_at   | 0.021038585 | 0.804690643 | 0.424252865 | 0.605754099 |
| 240548_at   | 0.052545212 | 1.875272264 | 0.065743391 | 0.157967937 |
| 240549_at   | 0.057989553 | 1.380321643 | 0.172733666 | 0.32619847  |
| 240550_at   | 0.040381009 | 1.13164026  | 0.262398098 | 0.436893517 |
| 240551_at   | -0.18766797 | -3.79281838 | 0.000354847 | 0.00214132  |
| 240552_at   | 0.069211964 | 2.224738554 | 0.029965165 | 0.08504497  |
| 240553_at   | -0.00062712 | -0.01820995 | 0.985533263 | 0.99310365  |
| 240554_at   | 0.026099095 | 0.62801102  | 0.53243804  | 0.699421577 |
| 240555_at   | -0.01137142 | -0.36149013 | 0.719033977 | 0.835610331 |
| 240556_at   | -0.02255716 | -0.62897056 | 0.531814012 | 0.698909984 |
| 240557_at   | 0.248479574 | 2.424483237 | 0.018435737 | 0.057675262 |
| 240558_at   | 0.094720935 | 1.801823318 | 0.076720702 | 0.177694943 |
| 240559_at   | -0.04042291 | -1.05884521 | 0.294017909 | 0.472636802 |
| 240560_at   | -0.00989644 | -0.26207759 | 0.794181225 | 0.8829021   |
| 240561_at   | -0.0584951  | -1.60879267 | 0.113039566 | 0.23867172  |
| 240562_at   | -0.00672655 | -0.23775303 | 0.812902453 | 0.894899535 |
| 240563_at   | -0.03907856 | -1.2761337  | 0.206945958 | 0.370649971 |
| 240564_x_at | -0.01684326 | -0.54204393 | 0.589844729 | 0.744145114 |
| 240565_at   | -0.04007366 | -0.91704503 | 0.362880041 | 0.546027653 |
| 240566_at   | -0.06799102 | -1.69386795 | 0.095602906 | 0.210300983 |
| 240567_at   | -0.04824328 | -2.03782681 | 0.046092527 | 0.119758638 |
| 240568_at   | 0.146389078 | 3.392879352 | 0.001245473 | 0.006126879 |
| 240569_at   | 0.062764074 | 1.770360317 | 0.081871666 | 0.186853005 |
| 240570_at   | -0.03671201 | -1.36260022 | 0.178225456 | 0.333693007 |

|             |             |             |             |             |
|-------------|-------------|-------------|-------------|-------------|
| 240571_at   | -0.0184067  | -0.43107799 | 0.66799421  | 0.799932644 |
| 240572_s_at | 0.069548301 | 1.749209611 | 0.08549363  | 0.193276408 |
| 240573_at   | 0.009633845 | 0.319142028 | 0.750754345 | 0.856613985 |
| 240574_at   | -0.01706865 | -0.34398734 | 0.732087809 | 0.843665429 |
| 240575_at   | -0.00823047 | -0.35604067 | 0.723089469 | 0.838122168 |
| 240576_at   | 0.003802094 | 0.101203055 | 0.91973495  | 0.957751861 |
| 240577_at   | -0.05675845 | -1.44830121 | 0.152865615 | 0.298269813 |
| 240578_at   | 0.039675339 | 0.958218652 | 0.341891601 | 0.524897569 |
| 240579_at   | 0.032988061 | 0.908443183 | 0.367367283 | 0.55056432  |
| 240580_at   | -0.1077949  | -2.98410456 | 0.004143328 | 0.016884621 |
| 240581_at   | -0.06347803 | -1.39105202 | 0.169472021 | 0.321652812 |
| 240582_x_at | -0.03060974 | -0.96663876 | 0.337699479 | 0.520501626 |
| 240583_at   | -0.05309342 | -1.69088095 | 0.096175365 | 0.211300236 |
| 240584_at   | 0.01704849  | 0.517716254 | 0.606606402 | 0.756430627 |
| 240585_at   | -0.04354042 | -1.45511634 | 0.150976332 | 0.295693686 |
| 240586_at   | -0.02717036 | -1.12757924 | 0.264096076 | 0.438952056 |
| 240587_x_at | 0.061513277 | 2.311399725 | 0.024348744 | 0.072209293 |
| 240588_at   | 0.053313273 | 1.413526095 | 0.162794481 | 0.312252603 |
| 240589_at   | -0.03132115 | -1.03965825 | 0.302771875 | 0.482440126 |
| 240590_at   | 0.043705389 | 1.403235024 | 0.165826488 | 0.316714418 |
| 240591_at   | -0.14589272 | -4.34030514 | 5.71E-05    | 0.000460332 |
| 240592_at   | 0.332236476 | 6.087720633 | 9.46E-08    | 2.42E-06    |
| 240593_x_at | 0.141319284 | 4.554770233 | 2.71E-05    | 0.000246543 |
| 240594_at   | 0.123487482 | 3.347617548 | 0.001428822 | 0.006880394 |
| 240595_at   | 0.163134482 | 4.507187377 | 3.20E-05    | 0.000282658 |
| 240596_at   | -0.04674376 | -1.47923598 | 0.144436233 | 0.286373459 |
| 240597_at   | -0.0569213  | -2.11523545 | 0.038674119 | 0.104034173 |
| 240598_at   | -0.02625179 | -0.90105636 | 0.371248874 | 0.55448788  |
| 240599_x_at | -0.02090364 | -1.04061865 | 0.302329511 | 0.481965291 |
| 240600_at   | 0.248767673 | 5.631332524 | 5.34E-07    | 9.56E-06    |
| 240601_at   | -0.00010282 | -0.00399328 | 0.9968274   | 0.998562569 |
| 240602_at   | 0.037647266 | 1.239628727 | 0.220057058 | 0.386967933 |
| 240603_s_at | 0.043090963 | 1.711572773 | 0.092266969 | 0.204807558 |
| 240604_at   | -0.02820457 | -0.61028532 | 0.544033784 | 0.708510588 |
| 240605_at   | -0.04015781 | -1.08006941 | 0.284539104 | 0.462069752 |
| 240606_at   | 0.118202038 | 2.692511126 | 0.009232508 | 0.032729378 |
| 240607_at   | -0.08941612 | -2.0660538  | 0.043255922 | 0.113844512 |
| 240608_at   | 0.045447953 | 0.909826051 | 0.366643512 | 0.549778081 |
| 240609_at   | -0.08935515 | -2.39467708 | 0.019854171 | 0.061234446 |
| 240610_at   | 0.002089596 | 0.055386356 | 0.956019181 | 0.977385549 |
| 240611_at   | -0.05631815 | -1.94239417 | 0.056902883 | 0.141173734 |
| 240612_at   | -0.04258029 | -1.28613524 | 0.203457361 | 0.366296435 |
| 240613_at   | 0.083741602 | 3.211536276 | 0.00214585  | 0.00966855  |
| 240614_at   | -0.03842954 | -0.7927314  | 0.431133979 | 0.611982374 |
| 240615_at   | 0.003848597 | 0.080472704 | 0.936135667 | 0.966810908 |
| 240616_at   | 0.04977781  | 1.372398902 | 0.175172635 | 0.32948173  |
| 240617_at   | 0.083292382 | 2.400214745 | 0.01958347  | 0.060544026 |
| 240618_at   | -0.01900745 | -0.55010284 | 0.584340827 | 0.739911931 |
| 240619_at   | -0.02403944 | -0.86810822 | 0.388878451 | 0.571702491 |
| 240620_at   | 0.00306604  | 0.096352114 | 0.923569877 | 0.959955927 |
| 240621_at   | 0.079091425 | 2.368960292 | 0.021155709 | 0.064468223 |
| 240622_at   | 0.051898666 | 1.812524527 | 0.075031695 | 0.174679196 |
| 240623_at   | 0.004767292 | 0.16928501  | 0.866155819 | 0.927657885 |
| 240624_x_at | 0.073777845 | 1.886907496 | 0.064132483 | 0.155014004 |
| 240625_at   | 0.12975425  | 2.678079598 | 0.009593538 | 0.033733628 |
| 240626_at   | -0.12613945 | -1.94610272 | 0.056445506 | 0.140283165 |
| 240627_x_at | -0.02517685 | -1.01080923 | 0.316265716 | 0.497461626 |
| 240628_at   | -0.06035293 | -2.10595684 | 0.039504678 | 0.105839546 |
| 240629_at   | -0.0320667  | -1.14187359 | 0.258153717 | 0.431983148 |
| 240630_at   | -0.00566078 | -0.14395794 | 0.886027899 | 0.938972751 |
| 240631_at   | -0.01475527 | -0.53760695 | 0.592885428 | 0.746197987 |
| 240632_at   | 0.02720681  | 0.792258599 | 0.431407379 | 0.612311312 |
| 240633_at   | -0.01422232 | -0.44950314 | 0.654727936 | 0.790797819 |
| 240634_x_at | -0.01577136 | -0.56056485 | 0.577232491 | 0.734411549 |
| 240635_at   | -0.14291232 | -3.19393371 | 0.002260184 | 0.010106266 |
| 240636_at   | -0.00660625 | -0.14697034 | 0.883660198 | 0.937820084 |
| 240637_at   | 0.087819529 | 2.985663341 | 0.004125081 | 0.016817929 |
| 240638_at   | 0.009215756 | 0.35609245  | 0.723050895 | 0.838099194 |
| 240639_at   | -0.03572976 | -1.28292031 | 0.204573928 | 0.367653933 |
| 240640_at   | 0.044535083 | 1.462351419 | 0.148990654 | 0.292828592 |
| 240641_at   | 0.100434471 | 3.71194049  | 0.000460099 | 0.002670488 |
| 240642_at   | -0.07831533 | -2.18040678 | 0.033257881 | 0.092469901 |
| 240643_at   | -0.03580947 | -0.95966044 | 0.341171367 | 0.524099637 |
| 240644_at   | -0.01796679 | -0.55045111 | 0.584103525 | 0.739804873 |
| 240645_at   | -0.0077682  | -0.25924598 | 0.796354537 | 0.884306332 |

|             |             |             |             |             |
|-------------|-------------|-------------|-------------|-------------|
| 240646_at   | -0.065263   | -1.97600416 | 0.052871171 | 0.133197203 |
| 240647_at   | -0.05447634 | -1.33433461 | 0.187259252 | 0.345247892 |
| 240648_at   | -0.04983249 | -1.11189604 | 0.27072639  | 0.446501729 |
| 240649_at   | -0.04911704 | -1.85288284 | 0.068939567 | 0.163824488 |
| 240650_at   | -0.05599197 | -1.29054674 | 0.20193264  | 0.36428407  |
| 240651_at   | -0.00795508 | -0.20444135 | 0.838717431 | 0.910954589 |
| 240652_at   | 0.200459922 | 3.435845454 | 0.001092222 | 0.005478517 |
| 240653_at   | -0.02512396 | -0.84121946 | 0.403646669 | 0.585973395 |
| 240654_at   | 0.049702071 | 1.437910603 | 0.155781536 | 0.302322654 |
| 240655_at   | 0.128862836 | 1.513418014 | 0.135551684 | 0.273489948 |
| 240656_at   | -0.0042857  | -0.12193946 | 0.903364407 | 0.948695862 |
| 240657_at   | -0.03717399 | -1.09551027 | 0.277777825 | 0.45441512  |
| 240658_at   | -0.00039581 | -0.01096883 | 0.991285598 | 0.99594751  |
| 240659_x_at | -0.02374292 | -0.99379223 | 0.324412356 | 0.506555692 |
| 240660_at   | -0.03817491 | -1.13166987 | 0.262385744 | 0.436889224 |
| 240661_at   | 0.002092586 | 0.050531744 | 0.959870603 | 0.979463377 |
| 240662_at   | -0.04842822 | -1.61925759 | 0.110764942 | 0.235113123 |
| 240663_at   | -0.09720341 | -2.14943566 | 0.035742807 | 0.09783901  |
| 240664_at   | -7.15E-05   | -0.0018311  | 0.998545218 | 0.999260701 |
| 240665_at   | -0.04817005 | -0.51540667 | 0.608208989 | 0.757670439 |
| 240666_at   | -0.03989562 | -0.792067   | 0.431518198 | 0.612378089 |
| 240667_at   | 0.053808212 | 1.550834364 | 0.126328843 | 0.259640775 |
| 240668_s_at | -0.02353208 | -0.91107013 | 0.365993164 | 0.549284491 |
| 240669_at   | -0.07707555 | -2.79164864 | 0.007070046 | 0.02626118  |
| 240670_at   | -0.05630855 | -1.6403194  | 0.106299422 | 0.22788361  |
| 240671_at   | -0.01607013 | -0.63144187 | 0.530208568 | 0.697476934 |
| 240672_at   | -0.0201512  | -0.40518501 | 0.686817819 | 0.813054909 |
| 240673_at   | 0.021426148 | 0.856881113 | 0.395003295 | 0.577666468 |
| 240674_at   | -0.10023092 | -3.47592868 | 0.000965524 | 0.004953644 |
| 240675_at   | -0.07376621 | -2.29276249 | 0.025470806 | 0.074807208 |
| 240676_at   | 0.024614957 | 0.956496876 | 0.34275301  | 0.52569335  |
| 240677_at   | 0.023961197 | 0.725916291 | 0.470781155 | 0.647289691 |
| 240678_at   | 0.020232371 | 0.561713845 | 0.576454365 | 0.73375576  |
| 240679_at   | -0.02313334 | -0.66208752 | 0.510512066 | 0.68137249  |
| 240680_at   | -0.02723461 | -0.83644989 | 0.406301817 | 0.588639798 |
| 240681_at   | 0.072186886 | 1.520146599 | 0.133854879 | 0.270934885 |
| 240682_at   | 0.046949198 | 1.381157843 | 0.172477773 | 0.3258116   |
| 240683_at   | 0.034171185 | 0.833168426 | 0.408134751 | 0.590302857 |
| 240684_at   | -0.02251886 | -0.74731312 | 0.457864575 | 0.636580606 |
| 240685_at   | -0.01737636 | -0.44157761 | 0.660421007 | 0.794795768 |
| 240686_x_at | 0.027648657 | 0.473694483 | 0.63747889  | 0.77914474  |
| 240687_at   | 0.009149255 | 0.276888558 | 0.782840595 | 0.87588524  |
| 240688_at   | 0.017719445 | 0.858052539 | 0.394361452 | 0.577011034 |
| 240689_at   | 0.035640915 | 1.151371462 | 0.254258273 | 0.427433166 |
| 240690_at   | -0.2808107  | -4.26825642 | 7.30E-05    | 0.000566341 |
| 240691_at   | 0.100181386 | 2.5438837   | 0.013622428 | 0.044877897 |
| 240692_at   | 0.025269288 | 0.921005806 | 0.360825744 | 0.543897742 |
| 240693_at   | -0.02204295 | -0.56255708 | 0.575883634 | 0.733238124 |
| 240694_at   | 0.013411584 | 0.399425337 | 0.691032722 | 0.81631471  |
| 240695_at   | -0.007149   | -0.15851002 | 0.874600237 | 0.932566939 |
| 240696_at   | 0.038198127 | 1.079841972 | 0.284639542 | 0.462199267 |
| 240697_at   | 0.050559165 | 1.314864918 | 0.193680769 | 0.35369513  |
| 240698_s_at | 0.131664892 | 4.616259166 | 2.18E-05    | 0.000205622 |
| 240699_at   | -0.01422266 | -0.35488684 | 0.723949175 | 0.838640138 |
| 240700_at   | -0.02761901 | -1.00403982 | 0.319489829 | 0.501053057 |
| 240701_at   | 0.046335355 | 1.348530609 | 0.182679703 | 0.339563632 |
| 240702_at   | -0.02393745 | -1.08712413 | 0.281435919 | 0.458697133 |
| 240703_s_at | -0.03751221 | -1.35209439 | 0.181543531 | 0.338106575 |
| 240704_at   | -0.10272481 | -2.4614436  | 0.016803551 | 0.053431824 |
| 240705_at   | 0.06237372  | 1.551689098 | 0.126124162 | 0.259388124 |
| 240706_at   | 0.004027896 | 0.124806518 | 0.901104134 | 0.94727419  |
| 240707_at   | -0.04168322 | -1.26524791 | 0.210793381 | 0.375539256 |
| 240708_at   | -0.003962   | -0.09995483 | 0.920721558 | 0.958276449 |
| 240709_at   | 0.030875248 | 0.777334807 | 0.440089952 | 0.620633623 |
| 240710_at   | 0.003346257 | 0.110735761 | 0.912204499 | 0.95359851  |
| 240711_at   | -0.01968636 | -0.8215792  | 0.414648498 | 0.596884024 |
| 240712_s_at | -0.00572931 | -0.21942949 | 0.827078481 | 0.904025422 |
| 240713_s_at | -1.20514699 | -7.26986086 | 9.81E-10    | 9.24E-08    |
| 240714_at   | -0.03739403 | -1.40636723 | 0.164899082 | 0.315347444 |
| 240715_at   | 0.080677338 | 2.267193245 | 0.0270848   | 0.078454461 |
| 240716_at   | 0.016440705 | 0.488450844 | 0.627054502 | 0.771743447 |
| 240717_at   | 0.007408265 | 0.262568084 | 0.793804929 | 0.882637455 |
| 240718_at   | -0.03737851 | -1.40713189 | 0.164673288 | 0.315030276 |
| 240719_at   | 0.046699876 | 1.245523389 | 0.217899492 | 0.384307976 |
| 240720_at   | -0.05336718 | -1.4105915  | 0.163654683 | 0.313544609 |

|             |             |             |             |             |
|-------------|-------------|-------------|-------------|-------------|
| 240721_at   | 0.055343489 | 1.453902018 | 0.151311622 | 0.296133336 |
| 240722_at   | -0.03901249 | -1.11669018 | 0.268687289 | 0.444148787 |
| 240723_at   | -0.06820933 | -2.22231569 | 0.030137408 | 0.08543074  |
| 240724_at   | -0.0142034  | -0.40274128 | 0.688604922 | 0.814523229 |
| 240725_at   | 0.082842412 | 2.306435763 | 0.024643226 | 0.072865037 |
| 240726_at   | -0.00889332 | -0.35705456 | 0.722334321 | 0.837703128 |
| 240727_s_at | 0.022788978 | 0.791309475 | 0.431956523 | 0.612818264 |
| 240728_at   | -0.04663813 | -1.23121723 | 0.223163002 | 0.390315489 |
| 240729_at   | -0.01665205 | -0.45313188 | 0.652128165 | 0.789193391 |
| 240730_at   | 0.081602116 | 3.210226245 | 0.002154169 | 0.009703094 |
| 240731_at   | -0.12191353 | -2.78782427 | 0.007143975 | 0.026493946 |
| 240732_at   | -0.07204287 | -1.78764833 | 0.079006827 | 0.181840205 |
| 240733_at   | 0.005039174 | 0.134924422 | 0.893134271 | 0.94288177  |
| 240734_at   | 0.026884896 | 1.415502349 | 0.162217167 | 0.31141147  |
| 240735_at   | -0.00750719 | -0.16576628 | 0.868911798 | 0.929037794 |
| 240736_at   | -0.08472275 | -2.60655337 | 0.011580771 | 0.039322885 |
| 240737_at   | -0.02854023 | -0.96884606 | 0.336606163 | 0.519375567 |
| 240738_at   | -0.01312435 | -0.44045636 | 0.661228065 | 0.795421939 |
| 240739_at   | -0.04421066 | -1.42750345 | 0.158745315 | 0.30657481  |
| 240740_at   | -0.04704393 | -1.80068497 | 0.076902229 | 0.178048299 |
| 240741_x_at | 0.000860036 | 0.035885309 | 0.971495843 | 0.985587638 |
| 240742_at   | 0.048940226 | 1.484558997 | 0.143023324 | 0.284322496 |
| 240743_at   | 0.065727599 | 2.271763512 | 0.026789831 | 0.077817579 |
| 240744_at   | -0.01646896 | -0.46581814 | 0.643073442 | 0.783179952 |
| 240745_at   | -0.01785181 | -0.6564333  | 0.51411639  | 0.684691867 |
| 240746_s_at | 0.011733853 | 0.355963687 | 0.723146816 | 0.83814794  |
| 240747_at   | -0.06809527 | -2.28101621 | 0.026201353 | 0.076542414 |
| 240748_at   | 0.048473803 | 1.445577656 | 0.153625778 | 0.299321792 |
| 240749_at   | -0.0230048  | -0.89190661 | 0.376092889 | 0.558898338 |
| 240750_at   | -0.02152633 | -0.8409689  | 0.403785886 | 0.586137418 |
| 240751_at   | 0.022822627 | 1.126732585 | 0.264451056 | 0.439345994 |
| 240752_at   | -0.02701321 | -0.56165427 | 0.5764947   | 0.733768551 |
| 240753_at   | 0.005437474 | 0.12653379  | 0.899742816 | 0.946304237 |
| 240754_at   | -0.14448314 | -3.92006266 | 0.000234486 | 0.001510904 |
| 240755_at   | -0.0449302  | -1.52385352 | 0.132927297 | 0.269570132 |
| 240756_at   | -0.03701593 | -0.98600097 | 0.328188683 | 0.510734502 |
| 240757_at   | -0.05261201 | -1.67555188 | 0.099157613 | 0.216179137 |
| 240758_at   | 0.444935585 | 5.516343627 | 8.22E-07    | 1.36E-05    |
| 240759_at   | 0.119386938 | 2.830982255 | 0.006349547 | 0.024014043 |
| 240760_at   | -0.0029323  | -0.08160225 | 0.935241254 | 0.966333799 |
| 240761_at   | -0.02947927 | -0.89642525 | 0.37369567  | 0.556799696 |
| 240762_at   | -0.03694116 | -1.30868306 | 0.195753989 | 0.356289779 |
| 240763_at   | 0.054332971 | 1.543267652 | 0.128152416 | 0.26236024  |
| 240764_at   | -0.02520651 | -0.57634853 | 0.566588117 | 0.726675371 |
| 240765_at   | 0.231896735 | 5.374556643 | 1.39E-06    | 2.10E-05    |
| 240766_at   | -0.0697307  | -2.00888596 | 0.049166287 | 0.125806692 |
| 240767_x_at | -0.07708665 | -2.38386812 | 0.020392224 | 0.062551064 |
| 240768_x_at | 0.044787695 | 1.69237126  | 0.095889396 | 0.210817045 |
| 240769_at   | 0.105092183 | 2.88385766  | 0.005487558 | 0.021270514 |
| 240770_at   | 0.01617457  | 0.578785333 | 0.564953403 | 0.725366184 |
| 240771_at   | -0.00289997 | -0.08486894 | 0.932655039 | 0.965089581 |
| 240772_at   | 0.052759439 | 1.540739147 | 0.128766442 | 0.263270499 |
| 240773_at   | 0.010651513 | 0.486298086 | 0.628570599 | 0.772843192 |
| 240774_at   | -0.00019189 | -0.00697158 | 0.994461223 | 0.997389153 |
| 240775_at   | 0.015768294 | 0.324318854 | 0.746852151 | 0.85375272  |
| 240776_at   | 0.042727493 | 1.701735638 | 0.094108443 | 0.207909562 |
| 240777_at   | 0.043782746 | 1.795544712 | 0.077726393 | 0.179512581 |
| 240778_at   | 0.075281357 | 2.478411278 | 0.01609878  | 0.051565017 |
| 240779_at   | -0.05660584 | -1.3009457  | 0.198372336 | 0.359559413 |
| 240780_at   | 0.102606702 | 3.036937913 | 0.003564955 | 0.014862404 |
| 240781_x_at | 0.003249485 | 0.164285336 | 0.870072204 | 0.929869122 |
| 240782_at   | -0.04422307 | -1.43094495 | 0.157760429 | 0.305076763 |
| 240783_at   | -0.08818803 | -1.98008667 | 0.052398539 | 0.132348524 |
| 240784_at   | -0.05658708 | -2.03052788 | 0.046851658 | 0.121237582 |
| 240785_at   | -0.04143616 | -1.01356539 | 0.314959317 | 0.496265468 |
| 240786_at   | 0.01320836  | 0.353405411 | 0.725053503 | 0.83931196  |
| 240787_at   | -0.0128644  | -0.62555135 | 0.534039403 | 0.700680768 |
| 240788_at   | -0.02318325 | -0.52665748 | 0.60042055  | 0.751989554 |
| 240789_at   | 0.086689844 | 2.976037016 | 0.004238973 | 0.01721356  |
| 240790_at   | -0.11989063 | -2.43548724 | 0.017935508 | 0.056425013 |
| 240791_at   | 0.002889462 | 0.107873222 | 0.914464971 | 0.954358486 |
| 240792_at   | -0.03577235 | -0.87697099 | 0.384085573 | 0.566803331 |
| 240793_at   | -0.00702966 | -0.18781214 | 0.851673121 | 0.918571751 |
| 240794_at   | -0.04044232 | -0.98720631 | 0.327602567 | 0.5099869   |
| 240795_at   | -0.04443357 | -1.11624171 | 0.268877579 | 0.444376189 |

|             |             |             |             |             |
|-------------|-------------|-------------|-------------|-------------|
| 240796_at   | 0.053390725 | 1.361414958 | 0.178597466 | 0.334193517 |
| 240797_at   | -0.07284569 | -2.0711028  | 0.04276481  | 0.112737858 |
| 240798_at   | 0.040844468 | 1.017861212 | 0.312930391 | 0.493934338 |
| 240799_at   | -0.18823006 | -6.24043702 | 5.27E-08    | 1.53E-06    |
| 240800_x_at | 0.125158469 | 4.539832981 | 2.85E-05    | 0.00025718  |
| 240801_at   | -0.0085841  | -0.17752988 | 0.85970478  | 0.923523833 |
| 240802_at   | -5.15E-05   | -0.00171686 | 0.998635978 | 0.999310037 |
| 240803_at   | -0.03675754 | -0.72717853 | 0.4700135   | 0.646711718 |
| 240804_at   | -0.05553545 | -1.45034083 | 0.152298268 | 0.297383529 |
| 240805_at   | 0.0252341   | 0.656471732 | 0.514091846 | 0.684679583 |
| 240806_at   | -0.07325375 | -1.64861739 | 0.104580775 | 0.225258227 |
| 240807_at   | -0.05828596 | -1.84657664 | 0.069863094 | 0.165464834 |
| 240808_at   | 0.009609826 | 0.24209465  | 0.809552565 | 0.893037548 |
| 240809_at   | 0.000108389 | 0.002511486 | 0.998004662 | 0.999055311 |
| 240810_at   | -0.05367841 | -1.72146644 | 0.090444958 | 0.201674703 |
| 240811_at   | -0.04307618 | -1.49352414 | 0.140668285 | 0.280934266 |
| 240812_at   | -0.05685136 | -1.97899838 | 0.052524175 | 0.132577116 |
| 240813_at   | 0.016074623 | 0.484847132 | 0.629593352 | 0.773694914 |
| 240814_at   | -0.00416298 | -0.11919452 | 0.905529167 | 0.94993098  |
| 240815_at   | 0.013599065 | 0.455060007 | 0.650748541 | 0.788359525 |
| 240816_at   | -0.06570041 | -1.54324931 | 0.12815686  | 0.26236024  |
| 240817_at   | -0.03405472 | -0.96650083 | 0.33776788  | 0.520571145 |
| 240818_at   | 0.025668413 | 0.658214567 | 0.512979444 | 0.683628522 |
| 240819_at   | -0.01994895 | -0.42768177 | 0.670451341 | 0.80156669  |
| 240820_at   | -0.02225544 | -0.78910067 | 0.433236103 | 0.614087787 |
| 240821_at   | 0.106415627 | 2.075981878 | 0.042294828 | 0.111798605 |
| 240822_at   | -0.01701542 | -0.57154763 | 0.569815567 | 0.728563177 |
| 240823_at   | -0.10813193 | -2.16105269 | 0.034792304 | 0.095824099 |
| 240824_at   | 0.184544663 | 4.013312665 | 0.00017236  | 0.001161681 |
| 240825_at   | -0.0552313  | -1.44465922 | 0.153882782 | 0.299639652 |
| 240826_at   | 0.06287716  | 1.200659003 | 0.234717242 | 0.403554012 |
| 240827_at   | -0.04714795 | -1.08653594 | 0.281693744 | 0.458916517 |
| 240828_at   | -0.07721328 | -1.95369321 | 0.055519151 | 0.138501921 |
| 240829_at   | 0.037306344 | 1.160507106 | 0.250551152 | 0.423190933 |
| 240830_at   | 0.198215612 | 4.878346711 | 8.57E-06    | 9.39E-05    |
| 240831_at   | -0.08949675 | -2.75703511 | 0.007765595 | 0.028375438 |
| 240832_at   | -0.01564204 | -0.46921162 | 0.64066049  | 0.781601251 |
| 240833_at   | -0.08135433 | -2.17835195 | 0.033417924 | 0.092793653 |
| 240834_at   | -0.03065717 | -1.10249269 | 0.274757483 | 0.451036232 |
| 240835_at   | 0.04290621  | 1.064600957 | 0.291426155 | 0.469809217 |
| 240836_at   | 0.045363365 | 1.586406133 | 0.118032216 | 0.246615044 |
| 240837_at   | 0.011266678 | 0.220735633 | 0.826066007 | 0.903537493 |
| 240838_s_at | 0.019166721 | 0.574810523 | 0.567621077 | 0.727228608 |
| 240839_at   | 0.081235977 | 2.485687242 | 0.015804815 | 0.050779927 |
| 240840_s_at | 0.009691025 | 0.350611852 | 0.727137547 | 0.840666357 |
| 240841_at   | -0.15747189 | -3.65706132 | 0.000547884 | 0.003093532 |
| 240842_at   | 0.028532414 | 0.829722869 | 0.410064773 | 0.592240091 |
| 240843_at   | 0.003471667 | 0.107067482 | 0.915101372 | 0.954807244 |
| 240844_at   | 0.00519182  | 0.170312225 | 0.865351587 | 0.927218727 |
| 240845_at   | 0.025320864 | 0.579379543 | 0.564555134 | 0.725039378 |
| 240846_at   | 0.129926174 | 2.85971831  | 0.005866694 | 0.022477006 |
| 240847_at   | -0.00030428 | -0.00577887 | 0.995408797 | 0.997864832 |
| 240848_at   | 0.026995577 | 0.902258293 | 0.370615516 | 0.553853696 |
| 240849_at   | -0.03539448 | -0.95840562 | 0.341798146 | 0.524809933 |
| 240850_at   | -0.00666599 | -0.25987337 | 0.795872868 | 0.88410097  |
| 240851_at   | -0.06726575 | -1.80692917 | 0.075910904 | 0.1762476   |
| 240852_at   | -0.0091878  | -0.31689338 | 0.752451378 | 0.857455749 |
| 240853_at   | -0.04651053 | -1.20554572 | 0.232840898 | 0.401426336 |
| 240854_x_at | 0.033599125 | 0.765707815 | 0.446925187 | 0.626772326 |
| 240855_at   | -0.06347133 | -1.93781553 | 0.057471927 | 0.142214459 |
| 240856_at   | -0.00048678 | -0.0170673  | 0.986440933 | 0.993419155 |
| 240857_at   | 0.179164621 | 1.827517683 | 0.072717757 | 0.170500079 |
| 240858_at   | 0.002122973 | 0.080217908 | 0.936337436 | 0.966929911 |
| 240859_at   | 0.179964151 | 2.300033983 | 0.025027675 | 0.073782114 |
| 240860_at   | -0.01815833 | -0.39890662 | 0.691412799 | 0.816634182 |
| 240861_at   | 0.107488793 | 2.826211647 | 0.006433172 | 0.02427075  |
| 240862_at   | -0.05640491 | -1.84838608 | 0.069597047 | 0.165027123 |
| 240863_at   | -0.03511402 | -1.20635063 | 0.232532889 | 0.401032642 |
| 240864_at   | -0.03201845 | -1.23898617 | 0.220293193 | 0.387302019 |
| 240865_at   | 0.167840271 | 3.884797552 | 0.000263193 | 0.001663926 |
| 240866_at   | 0.088971933 | 3.290681618 | 0.001695799 | 0.007935984 |
| 240867_at   | 0.332694928 | 3.499757401 | 0.000896956 | 0.00465692  |
| 240868_at   | 0.057969779 | 1.581806786 | 0.119079623 | 0.248039266 |
| 240869_at   | -0.58601442 | -6.30405995 | 4.13E-08    | 1.27E-06    |
| 240870_at   | 0.114487142 | 3.289458434 | 0.001702021 | 0.007962599 |



|             |             |             |             |             |
|-------------|-------------|-------------|-------------|-------------|
| 240871_at   | 0.064341193 | 1.762652658 | 0.083176504 | 0.189104394 |
| 240872_at   | -0.04331436 | -1.02644347 | 0.308903462 | 0.489453078 |
| 240873_x_at | -0.00126409 | -0.03888259 | 0.969116238 | 0.984402539 |
| 240874_at   | 0.046182979 | 1.328114832 | 0.189292902 | 0.347847293 |
| 240875_at   | -0.00523048 | -0.19776942 | 0.843910306 | 0.914273355 |
| 240876_x_at | -0.04887216 | -2.30820532 | 0.024537887 | 0.072641434 |
| 240877_x_at | 0.054107907 | 2.004474394 | 0.049650002 | 0.126790347 |
| 240878_at   | -0.05648933 | -1.46511911 | 0.148236489 | 0.291798148 |
| 240879_x_at | -0.03295527 | -1.0580919  | 0.294358285 | 0.473013824 |
| 240880_at   | -0.04030906 | -1.2910491  | 0.201759552 | 0.364035517 |
| 240881_at   | -0.05679939 | -1.49369867 | 0.140622744 | 0.280915562 |
| 240882_at   | -0.01068627 | -0.30536425 | 0.761171437 | 0.862500581 |
| 240883_at   | -0.00709282 | -0.26978187 | 0.788276383 | 0.879166034 |
| 240884_at   | -0.02335329 | -0.82922589 | 0.410343616 | 0.592557979 |
| 240885_at   | -0.04629706 | -1.37134197 | 0.175499987 | 0.330014113 |
| 240886_at   | -0.01425205 | -0.39695632 | 0.692842563 | 0.817739392 |
| 240887_at   | -0.00351037 | -0.11346311 | 0.91005146  | 0.95252713  |
| 240888_at   | -0.01677574 | -0.38706573 | 0.700110511 | 0.822797385 |
| 240889_at   | -0.0022913  | -0.06934699 | 0.944949661 | 0.971559871 |
| 240890_at   | -0.02392996 | -0.82450413 | 0.412998615 | 0.595295559 |
| 240891_at   | -0.01636974 | -0.45053155 | 0.653990705 | 0.790206196 |
| 240892_at   | -0.01531267 | -0.51069481 | 0.611484467 | 0.760285541 |
| 240893_at   | -0.08093567 | -2.82396862 | 0.00647284  | 0.024391583 |
| 240894_at   | -0.01690578 | -0.45916341 | 0.647816535 | 0.786339026 |
| 240895_at   | -0.02865462 | -0.6945313  | 0.490095216 | 0.664401838 |
| 240896_at   | -0.00991291 | -0.32677688 | 0.745001655 | 0.852291353 |
| 240897_at   | 0.086564805 | 2.534846958 | 0.013942342 | 0.045722861 |
| 240898_at   | 0.027413068 | 0.716666859 | 0.476427998 | 0.652264431 |
| 240899_at   | 0.022533181 | 0.621140257 | 0.536917463 | 0.70307399  |
| 240900_at   | -0.00632059 | -0.18097992 | 0.85700819  | 0.921903674 |
| 240901_at   | -0.05489732 | -1.72579085 | 0.089657954 | 0.200429836 |
| 240902_at   | -0.03534567 | -0.80256254 | 0.425472492 | 0.606933183 |
| 240903_at   | 0.058463658 | 1.550571579 | 0.126391825 | 0.259722444 |
| 240904_at   | -0.03885048 | -1.36711451 | 0.176814001 | 0.331689528 |
| 240905_at   | 0.013272102 | 0.427312615 | 0.670718635 | 0.801759378 |
| 240906_at   | 0.031427674 | 1.139518797 | 0.25912604  | 0.43318311  |
| 240907_at   | -0.0934391  | -2.40216452 | 0.019488948 | 0.060351999 |
| 240908_at   | 0.262088925 | 4.392748319 | 4.76E-05    | 0.000395029 |
| 240909_at   | 0.016404007 | 0.425722945 | 0.671870173 | 0.802459226 |
| 240910_at   | 0.163894348 | 2.427123237 | 0.018314597 | 0.057367252 |
| 240911_at   | -0.33771312 | -5.47690679 | 9.53E-07    | 1.54E-05    |
| 240912_x_at | -0.01429097 | -0.31811951 | 0.751525874 | 0.857012945 |
| 240913_at   | 0.143703508 | 3.869369867 | 0.000276788 | 0.001738121 |
| 240914_at   | -0.06248731 | -2.68572116 | 0.009400794 | 0.033204795 |
| 240915_at   | -0.0205738  | -0.77853759 | 0.439386391 | 0.619856584 |
| 240916_x_at | 0.005757023 | 0.192012376 | 0.848396722 | 0.916722185 |
| 240917_at   | -0.09145941 | -2.31360961 | 0.024218654 | 0.071904608 |
| 240918_at   | -0.05008683 | -1.19493229 | 0.236930069 | 0.406280116 |
| 240919_at   | -0.05208789 | -1.26430766 | 0.211128173 | 0.376040247 |
| 240920_at   | -0.04799842 | -1.37323367 | 0.174914422 | 0.32912072  |
| 240921_at   | 0.007349111 | 0.190982359 | 0.849199941 | 0.91723527  |
| 240922_at   | 0.003629353 | 0.163937645 | 0.870344683 | 0.930039389 |
| 240923_at   | -0.01140654 | -0.42711165 | 0.670864167 | 0.801759378 |
| 240924_x_at | 0.060592316 | 1.489406149 | 0.141746209 | 0.282518912 |
| 240925_at   | -0.05534503 | -1.85845209 | 0.068132541 | 0.162381586 |
| 240926_at   | 0.096301605 | 2.287477341 | 0.025797244 | 0.07559208  |
| 240927_at   | 0.197643845 | 3.365071741 | 0.001355284 | 0.006577298 |
| 240928_at   | -0.0360436  | -1.09967933 | 0.275971662 | 0.452386311 |
| 240929_at   | -0.03435402 | -1.00781422 | 0.317689461 | 0.499004338 |
| 240930_at   | -0.00844763 | -0.26362554 | 0.79299384  | 0.882212199 |
| 240931_s_at | -0.01710412 | -0.4179227  | 0.677531988 | 0.80657277  |
| 240932_at   | -0.01417924 | -0.33059518 | 0.7421301   | 0.850547877 |
| 240933_at   | -0.01946521 | -0.54253847 | 0.589506273 | 0.74392812  |
| 240934_at   | 0.005060774 | 0.156510765 | 0.876168708 | 0.933553792 |
| 240935_at   | -0.00050394 | -0.01426517 | 0.988666913 | 0.99477912  |
| 240936_at   | -0.11523801 | -2.33822715 | 0.022810741 | 0.068502738 |
| 240937_at   | -0.07576102 | -2.07580962 | 0.042311345 | 0.111826057 |
| 240938_at   | -0.04016678 | -1.22961397 | 0.223758638 | 0.390908492 |
| 240939_x_at | 0.0633891   | 1.319407054 | 0.192168036 | 0.351669661 |
| 240940_at   | -0.04599028 | -1.65660263 | 0.102948337 | 0.222526943 |
| 240941_at   | 0.095890317 | 2.823260636 | 0.006485408 | 0.024431254 |
| 240942_at   | -0.07190675 | -1.78067873 | 0.080151555 | 0.183991643 |
| 240943_at   | -0.08338124 | -2.91403271 | 0.00504553  | 0.019865043 |
| 240944_at   | -0.06667925 | -2.32039268 | 0.023823204 | 0.070999377 |
| 240945_at   | 0.011370133 | 0.397983084 | 0.692089703 | 0.817152938 |

|             |             |             |             |             |
|-------------|-------------|-------------|-------------|-------------|
| 240946_at   | -0.00473947 | -0.17705303 | 0.860077625 | 0.923693689 |
| 240947_at   | -0.02040488 | -0.73353182 | 0.466160404 | 0.643649308 |
| 240948_at   | 0.254288641 | 5.02080682  | 5.12E-06    | 6.14E-05    |
| 240949_x_at | 0.062375332 | 2.218581199 | 0.030404605 | 0.0859953   |
| 240950_s_at | -0.07724941 | -1.4714359  | 0.146526432 | 0.289242312 |
| 240951_at   | -0.03748862 | -1.28230646 | 0.20478764  | 0.36791965  |
| 240952_at   | -0.01349395 | -0.54779981 | 0.585911197 | 0.741053529 |
| 240953_at   | -0.04892626 | -0.89724366 | 0.37326253  | 0.55632125  |
| 240954_at   | -0.02993631 | -1.0518212  | 0.297202172 | 0.476201318 |
| 240955_at   | -0.04007046 | -1.27392517 | 0.207722272 | 0.371593634 |
| 240956_at   | -0.08087801 | -2.21204241 | 0.030877475 | 0.08708122  |
| 240957_at   | -0.01652607 | -0.67716223 | 0.500969185 | 0.673464124 |
| 240958_at   | -0.00919368 | -0.29399399 | 0.769801919 | 0.868180703 |
| 240959_at   | -0.04379956 | -1.84046596 | 0.070767903 | 0.166988339 |
| 240960_at   | 0.041825327 | 0.916570528 | 0.363126648 | 0.546269646 |
| 240961_at   | -0.03329706 | -1.18829885 | 0.239512115 | 0.409403942 |
| 240962_at   | 0.030683862 | 0.915612267 | 0.363625003 | 0.546768466 |
| 240963_x_at | -0.00490257 | -0.13720507 | 0.891339303 | 0.941856849 |
| 240964_at   | 0.006564892 | 0.299713049 | 0.765457192 | 0.86523883  |
| 240965_at   | 0.026403909 | 0.883529221 | 0.380562938 | 0.563369288 |
| 240966_at   | 0.044422623 | 1.824383532 | 0.073196444 | 0.171388667 |
| 240967_at   | -0.01249702 | -0.39517079 | 0.694152511 | 0.818680108 |
| 240968_at   | 0.028575478 | 0.959491063 | 0.341255924 | 0.52417548  |
| 240969_at   | -0.12033456 | -2.9626664  | 0.004402023 | 0.017760696 |
| 240970_x_at | -0.01761517 | -0.58237352 | 0.562550531 | 0.723455004 |
| 240971_x_at | 0.22722755  | 4.074666231 | 0.000140498 | 0.000980965 |
| 240972_at   | 0.014879198 | 0.390184895 | 0.697815359 | 0.821114874 |
| 240973_s_at | -0.02834386 | -0.81328997 | 0.419345933 | 0.601599712 |
| 240974_at   | -0.03588925 | -0.95260117 | 0.344707289 | 0.527609102 |
| 240975_x_at | -0.10936079 | -3.77946604 | 0.000370467 | 0.002219578 |
| 240976_at   | -0.00468003 | -0.11025321 | 0.91258551  | 0.953749891 |
| 240977_at   | 0.01236934  | 0.555474381 | 0.580685952 | 0.737042871 |
| 240978_at   | -0.03435827 | -1.48403146 | 0.143162862 | 0.28449873  |
| 240979_at   | -0.00101634 | -0.03027422 | 0.975951294 | 0.98797715  |
| 240980_at   | 0.015908161 | 0.451022453 | 0.653638915 | 0.790079508 |
| 240981_at   | -0.02383141 | -0.78702781 | 0.434438967 | 0.61516844  |
| 240982_at   | 0.039357391 | 1.151535822 | 0.254191234 | 0.427336541 |
| 240983_s_at | -0.04873202 | -0.88924472 | 0.37750962  | 0.560148072 |
| 240984_at   | 0.007872986 | 0.152548297 | 0.879278841 | 0.935213355 |
| 240985_at   | -0.06771597 | -1.75610809 | 0.084297965 | 0.191192319 |
| 240986_at   | -0.01837786 | -0.53055336 | 0.597734423 | 0.749949379 |
| 240987_at   | -0.04402321 | -1.75213416 | 0.084985032 | 0.192399122 |
| 240988_x_at | -0.02274653 | -0.80943193 | 0.421543155 | 0.603504715 |
| 240989_at   | 0.016835151 | 0.458900411 | 0.648004291 | 0.786448039 |
| 240990_at   | -0.01938428 | -0.85406228 | 0.396550431 | 0.579095277 |
| 240991_at   | 0.325087503 | 5.904613173 | 1.90E-07    | 4.16E-06    |
| 240992_at   | -0.03646195 | -1.0178486  | 0.312936337 | 0.493934338 |
| 240993_at   | -0.03304576 | -0.89053092 | 0.376824646 | 0.559522902 |
| 240994_at   | -0.02480876 | -0.47379602 | 0.637406908 | 0.779141992 |
| 240995_at   | -0.0447194  | -1.68982248 | 0.096378895 | 0.211711096 |
| 240996_at   | 0.024067975 | 0.604336107 | 0.547954305 | 0.711253632 |
| 240997_at   | 0.036555893 | 1.478457468 | 0.144643794 | 0.286666665 |
| 240998_at   | -0.04783398 | -1.39052217 | 0.169631955 | 0.321877948 |
| 240999_at   | -0.03348176 | -0.92108637 | 0.360784038 | 0.543870962 |
| 241000_at   | -0.00815132 | -0.27765105 | 0.78225802  | 0.875560089 |
| 241001_at   | 0.070537917 | 2.322051493 | 0.023727375 | 0.070775135 |
| 241002_at   | 0.016151016 | 0.515317458 | 0.608270931 | 0.757713327 |
| 241003_at   | 0.009916669 | 0.351379539 | 0.726564632 | 0.840375593 |
| 241004_at   | -0.01912863 | -0.53029059 | 0.59791542  | 0.750113293 |
| 241005_at   | -0.00555614 | -0.17558321 | 0.861227067 | 0.924350626 |
| 241006_at   | -0.01292316 | -0.41159242 | 0.682140621 | 0.809963831 |
| 241007_at   | -0.03094806 | -0.95861675 | 0.341692633 | 0.524683977 |
| 241008_at   | 0.067331914 | 1.306681963 | 0.196428662 | 0.357218812 |
| 241009_at   | -0.02190489 | -0.66684539 | 0.507489653 | 0.678697935 |
| 241010_x_at | 0.043844256 | 1.201774629 | 0.234287913 | 0.403141547 |
| 241011_at   | -0.0546294  | -1.69473512 | 0.095437238 | 0.210029595 |
| 241012_at   | -0.02546155 | -0.91875747 | 0.361990948 | 0.545194427 |
| 241013_at   | -0.05036898 | -1.07996846 | 0.28458368  | 0.462125348 |
| 241014_at   | -0.00985378 | -0.32392202 | 0.747151047 | 0.854050708 |
| 241015_at   | 0.028988225 | 0.778340435 | 0.439501671 | 0.619999643 |
| 241016_at   | -0.04346104 | -1.41601106 | 0.162068816 | 0.311213351 |
| 241017_at   | -0.08357258 | -2.00057286 | 0.050081198 | 0.127599847 |
| 241018_at   | 0.085573561 | 2.136772121 | 0.03680474  | 0.100123212 |
| 241019_at   | 0.011827881 | 0.309299385 | 0.758191533 | 0.860971049 |
| 241020_at   | 0.016102508 | 0.515533823 | 0.608120709 | 0.757641914 |

|             |             |             |             |             |
|-------------|-------------|-------------|-------------|-------------|
| 241021_at   | 0.029157441 | 1.021902682 | 0.311029674 | 0.491845523 |
| 241022_at   | 0.000232605 | 0.005362396 | 0.995739672 | 0.997950293 |
| 241023_at   | -0.01740855 | -0.68488045 | 0.496121037 | 0.669241538 |
| 241024_at   | -0.16553157 | -5.63623465 | 5.24E-07    | 9.43E-06    |
| 241025_at   | 0.031516515 | 1.049715059 | 0.298161559 | 0.477289172 |
| 241026_at   | 0.044196538 | 0.829999268 | 0.409909744 | 0.592122766 |
| 241027_at   | -0.01914704 | -0.71589192 | 0.476902826 | 0.652594645 |
| 241028_at   | -0.03072479 | -0.83680663 | 0.406102854 | 0.588430448 |
| 241029_at   | -0.05183684 | -2.15947501 | 0.034920076 | 0.096081765 |
| 241030_at   | -0.01176911 | -0.40664929 | 0.685747849 | 0.812390208 |
| 241031_at   | -0.08721324 | -1.2579252  | 0.213411189 | 0.378738549 |
| 241032_at   | 0.024509251 | 0.944024323 | 0.349035508 | 0.532139712 |
| 241033_at   | -0.04116537 | -1.31124186 | 0.194893825 | 0.355083361 |
| 241034_at   | -0.01908639 | -0.76912811 | 0.44490807  | 0.625100804 |
| 241035_s_at | 0.019825667 | 0.477975938 | 0.634446619 | 0.777117557 |
| 241036_at   | 0.07625344  | 1.394074254 | 0.168561973 | 0.320528091 |
| 241037_at   | -0.01210909 | -0.37703617 | 0.707509461 | 0.827684026 |
| 241038_at   | -0.02319861 | -0.46882559 | 0.64093478  | 0.781782584 |
| 241039_at   | 0.05262715  | 1.602145391 | 0.114503907 | 0.241083985 |
| 241040_at   | 0.014375285 | 0.452563512 | 0.652535081 | 0.789343849 |
| 241041_at   | -0.09899888 | -1.53007992 | 0.131380764 | 0.267327615 |
| 241042_at   | 0.014526836 | 0.455260399 | 0.650605225 | 0.788297587 |
| 241043_at   | 0.013922642 | 0.637340563 | 0.52638682  | 0.694678275 |
| 241044_x_at | -0.01709619 | -0.33377474 | 0.739741705 | 0.849012231 |
| 241045_at   | 0.001098983 | 0.027745127 | 0.977959759 | 0.988805552 |
| 241046_at   | -0.03416781 | -0.70418514 | 0.484108157 | 0.659053714 |
| 241047_at   | -0.01235094 | -0.44995478 | 0.654404125 | 0.790564828 |
| 241048_at   | -0.06653472 | -1.73359355 | 0.088252245 | 0.198000468 |
| 241049_at   | -0.07460252 | -1.97769183 | 0.052675348 | 0.132846152 |
| 241050_at   | -0.02065662 | -0.52432994 | 0.602028008 | 0.753122647 |
| 241051_at   | -0.00609632 | -0.19062691 | 0.849477162 | 0.917379503 |
| 241052_at   | -0.01383101 | -0.45128733 | 0.653449129 | 0.790041617 |
| 241053_at   | -0.00773536 | -0.21746391 | 0.828602683 | 0.904872599 |
| 241054_at   | -0.04962803 | -1.7764751  | 0.080848642 | 0.185163858 |
| 241055_at   | -0.04327257 | -1.32818883 | 0.189268609 | 0.347826501 |
| 241056_at   | 0.045486973 | 1.317551377 | 0.192784979 | 0.352419268 |
| 241057_x_at | -0.08401768 | -3.30279445 | 0.001635334 | 0.007708717 |
| 241058_at   | -0.03172253 | -0.90705286 | 0.368095876 | 0.551249569 |
| 241059_at   | 0.041123247 | 1.00101325  | 0.320938428 | 0.502800163 |
| 241060_x_at | 0.390461398 | 3.513157245 | 0.000860458 | 0.004494574 |
| 241061_at   | -0.02307009 | -0.993503   | 0.32455202  | 0.506738362 |
| 241062_at   | -0.00065688 | -0.0158558  | 0.987403321 | 0.993941827 |
| 241063_at   | 0.005257658 | 0.15648184  | 0.876191404 | 0.933553792 |
| 241064_at   | -0.004015   | -0.11849929 | 0.906077563 | 0.950216314 |
| 241065_x_at | 0.131118395 | 4.079714424 | 0.000138147 | 0.000968022 |
| 241066_at   | 0.073604836 | 3.343799555 | 0.001445404 | 0.006950505 |
| 241067_at   | -0.05452054 | -1.73342228 | 0.088282904 | 0.198039428 |
| 241068_at   | -0.0305013  | -1.31281878 | 0.194365148 | 0.354423567 |
| 241069_at   | 0.01130845  | 0.33951388  | 0.735437159 | 0.846157902 |
| 241070_at   | 0.038643764 | 1.122372464 | 0.266284469 | 0.441505676 |
| 241071_at   | -0.0266024  | -0.73946875 | 0.462576136 | 0.640557999 |
| 241072_s_at | -0.00388142 | -0.11393062 | 0.909682462 | 0.952345213 |
| 241073_at   | -0.1136283  | -2.65058511 | 0.010317304 | 0.035760893 |
| 241074_at   | -0.0379747  | -1.46073725 | 0.149431884 | 0.293430376 |
| 241075_at   | -0.00570666 | -0.19371779 | 0.847067177 | 0.915927762 |
| 241076_at   | 0.010846341 | 0.36104708  | 0.719363392 | 0.835765169 |
| 241077_at   | -0.01089093 | -0.29904741 | 0.765962487 | 0.865569556 |
| 241078_at   | 0.020742298 | 0.617200943 | 0.539494455 | 0.705208721 |
| 241079_at   | -0.0635408  | -1.910829   | 0.060925363 | 0.148831599 |
| 241080_at   | -0.08258354 | -2.37904181 | 0.020636655 | 0.063140507 |
| 241081_at   | 0.025491164 | 1.056394228 | 0.295126359 | 0.473997662 |
| 241082_at   | -0.01048764 | -0.45069109 | 0.653876363 | 0.790196377 |
| 241083_at   | -0.01314631 | -0.45705449 | 0.649322728 | 0.787440136 |
| 241084_x_at | -0.02770945 | -0.85677177 | 0.395063238 | 0.57769815  |
| 241085_at   | -0.0709817  | -1.83390386 | 0.07175051  | 0.168852288 |
| 241086_at   | -0.04766907 | -1.93274441 | 0.058107833 | 0.143359387 |
| 241087_at   | -0.01822891 | -0.50107831 | 0.618194177 | 0.765518665 |
| 241088_at   | 0.0277953   | 1.265387608 | 0.210743674 | 0.375525548 |
| 241089_at   | 0.012359829 | 0.356164205 | 0.722997444 | 0.838099194 |
| 241090_at   | 0.025771891 | 0.912408896 | 0.365294138 | 0.548579489 |
| 241091_at   | -0.00112383 | -0.03109981 | 0.975295687 | 0.987514779 |
| 241092_at   | 0.030471595 | 0.850335579 | 0.398601606 | 0.580932756 |
| 241093_at   | -0.01306229 | -0.3800346  | 0.705294468 | 0.826261337 |
| 241094_at   | -0.03006035 | -1.08460975 | 0.282539216 | 0.459858067 |
| 241095_at   | 0.035303568 | 1.029181589 | 0.307626122 | 0.488000094 |

|             |             |             |             |             |
|-------------|-------------|-------------|-------------|-------------|
| 241096_at   | -0.0640164  | -1.24576297 | 0.21781213  | 0.384184218 |
| 241097_at   | 0.048019201 | 1.442920728 | 0.154370181 | 0.300366239 |
| 241098_at   | -0.06721698 | -2.36157194 | 0.021543479 | 0.065422379 |
| 241099_at   | -0.02834258 | -1.06080026 | 0.293135799 | 0.471693855 |
| 241100_at   | 0.008905806 | 0.268374676 | 0.78935399  | 0.879981592 |
| 241101_at   | -0.03917265 | -1.466348   | 0.147902589 | 0.291320515 |
| 241102_at   | -0.0391941  | -0.81986529 | 0.415617132 | 0.597835883 |
| 241103_at   | -0.0291904  | -1.24071022 | 0.219660035 | 0.386559498 |
| 241104_at   | 0.079105835 | 1.929233267 | 0.058551629 | 0.144151897 |
| 241105_at   | -0.02472722 | -0.67278461 | 0.50373036  | 0.675847291 |
| 241106_at   | 0.094028216 | 2.717131934 | 0.008645166 | 0.030996371 |
| 241107_at   | -0.05082539 | -1.58360589 | 0.118669028 | 0.24751744  |
| 241108_at   | -0.03742707 | -1.46913174 | 0.147148405 | 0.290180316 |
| 241109_at   | -0.02076265 | -0.80816632 | 0.422265449 | 0.604213764 |
| 241110_at   | -0.0108589  | -0.36781506 | 0.71433712  | 0.832388185 |
| 241111_at   | -0.03556795 | -0.92972124 | 0.356331809 | 0.53950746  |
| 241112_at   | -0.02649767 | -0.79734947 | 0.428468996 | 0.60973077  |
| 241113_at   | -0.00994321 | -0.34252888 | 0.733179206 | 0.84440781  |
| 241114_s_at | 0.126853708 | 3.801788854 | 0.00034471  | 0.002089519 |
| 241115_at   | 0.003238102 | 0.109544993 | 0.91314473  | 0.953977118 |
| 241116_at   | 0.012531239 | 0.302184367 | 0.763582079 | 0.863993374 |
| 241117_at   | -0.04532826 | -1.27213692 | 0.208352444 | 0.372407911 |
| 241118_at   | -0.00830921 | -0.21807158 | 0.828131397 | 0.904534751 |
| 241119_at   | 0.022778625 | 0.876249644 | 0.384474277 | 0.567055784 |
| 241120_s_at | -0.08611189 | -2.3298817  | 0.023279641 | 0.069662785 |
| 241121_at   | -0.04301363 | -1.25448356 | 0.214649824 | 0.380359954 |
| 241122_s_at | -0.06711902 | -2.381815   | 0.020495887 | 0.062804401 |
| 241123_at   | -0.00022177 | -0.00943897 | 0.992500982 | 0.996671248 |
| 241124_at   | 0.020511904 | 0.528800233 | 0.598942474 | 0.750811653 |
| 241125_at   | -0.01838696 | -0.67587121 | 0.501782638 | 0.674059842 |
| 241126_at   | -0.06217291 | -1.89030911 | 0.063667888 | 0.154096061 |
| 241127_at   | -0.02253541 | -0.90458189 | 0.369393052 | 0.552631469 |
| 241128_at   | 0.044630771 | 1.662679208 | 0.101720069 | 0.220543992 |
| 241129_at   | -0.03340357 | -1.01939728 | 0.312207051 | 0.49316642  |
| 241130_at   | -0.0293236  | -1.50639526 | 0.137340799 | 0.276164627 |
| 241131_at   | -0.0597833  | -1.65744277 | 0.102777801 | 0.222244315 |
| 241132_at   | -0.05956923 | -2.08738776 | 0.041213596 | 0.109481576 |
| 241133_at   | -0.13148521 | -2.7262558  | 0.008436354 | 0.030398899 |
| 241134_at   | 0.071543056 | 1.92763703  | 0.05875434  | 0.144531536 |
| 241135_at   | -0.02829757 | -1.12596276 | 0.264774114 | 0.439724161 |
| 241136_at   | 0.003218541 | 0.109176742 | 0.913435527 | 0.954089363 |
| 241137_at   | -0.02124427 | -0.59970885 | 0.551013532 | 0.713732046 |
| 241138_at   | -0.0946439  | -2.73580142 | 0.008222851 | 0.029763962 |
| 241139_at   | -0.07205003 | -2.51925766 | 0.014510251 | 0.047259302 |
| 241140_at   | -0.07965636 | -3.32018059 | 0.001552093 | 0.007371548 |
| 241141_at   | 0.006980032 | 0.224345023 | 0.823269687 | 0.901778449 |
| 241142_at   | 0.01703892  | 0.74137038  | 0.461431419 | 0.639677521 |
| 241143_at   | 0.015149787 | 0.414315304 | 0.680156773 | 0.808402918 |
| 241144_at   | 0.027395711 | 0.895280793 | 0.374301908 | 0.557387611 |
| 241145_at   | -0.03998444 | -1.1663405  | 0.248204382 | 0.420406414 |
| 241146_at   | -0.06264566 | -1.51928516 | 0.134071171 | 0.271225275 |
| 241147_at   | -0.02196791 | -1.1696368  | 0.246885279 | 0.418581065 |
| 241148_at   | 0.017337234 | 0.521873163 | 0.603726871 | 0.75439695  |
| 241149_at   | -0.02251291 | -0.48451766 | 0.629825694 | 0.773854125 |
| 241150_at   | 0.042974694 | 1.099698704 | 0.275963286 | 0.452386311 |
| 241151_at   | -0.07061233 | -2.18441626 | 0.032947533 | 0.09179547  |
| 241152_at   | 0.101680965 | 2.746139071 | 0.007997234 | 0.029095764 |
| 241153_at   | 0.001319016 | 0.030569321 | 0.975716946 | 0.987829417 |
| 241154_x_at | 0.039303037 | 1.081128271 | 0.284071831 | 0.461545725 |
| 241155_at   | 0.441470863 | 5.315469757 | 1.74E-06    | 2.52E-05    |
| 241156_at   | -0.04404308 | -1.70734746 | 0.093054262 | 0.206155807 |
| 241157_at   | -0.04140476 | -1.09760727 | 0.276868308 | 0.453452009 |
| 241158_at   | -0.00292012 | -0.09109405 | 0.927728714 | 0.962239368 |
| 241159_x_at | 0.052759562 | 1.604085025 | 0.114075048 | 0.240335739 |
| 241160_at   | -0.02186178 | -0.59892129 | 0.551535067 | 0.714138522 |
| 241161_at   | -0.09100334 | -2.04327902 | 0.045532419 | 0.118551406 |
| 241162_at   | -0.06058861 | -1.93738722 | 0.057525404 | 0.142299517 |
| 241163_at   | -0.0494413  | -1.45052714 | 0.152246527 | 0.297320507 |
| 241164_at   | -0.06439898 | -2.56328089 | 0.012958091 | 0.04307028  |
| 241165_at   | 0.022339581 | 0.698481599 | 0.487640418 | 0.661957463 |
| 241166_at   | -0.01703852 | -0.62354409 | 0.535348065 | 0.701759128 |
| 241167_at   | -0.05477889 | -1.14632115 | 0.256324348 | 0.42985545  |
| 241168_at   | -0.03565149 | -0.86096092 | 0.392770703 | 0.575550289 |
| 241169_at   | -0.08096696 | -2.28503683 | 0.02594923  | 0.075942833 |
| 241170_at   | 0.050529767 | 1.722225944 | 0.090306323 | 0.201433638 |

|             |             |             |             |             |
|-------------|-------------|-------------|-------------|-------------|
| 241171_at   | 0.077024014 | 2.152329428 | 0.035503939 | 0.097346137 |
| 241172_at   | -0.06197684 | -1.91711959 | 0.060104979 | 0.14724616  |
| 241173_at   | 0.038332365 | 1.049927838 | 0.298064538 | 0.477185138 |
| 241174_at   | -0.03996517 | -0.87798005 | 0.383542246 | 0.566188517 |
| 241175_at   | -0.01645445 | -0.58217449 | 0.562683683 | 0.723542961 |
| 241176_at   | 0.067577359 | 2.660471774 | 0.010051495 | 0.035043405 |
| 241177_at   | 0.012673062 | 0.628630846 | 0.532034898 | 0.699101862 |
| 241178_at   | -0.05289523 | -1.30914244 | 0.195599355 | 0.356136494 |
| 241179_at   | 0.015910831 | 0.412176088 | 0.681715177 | 0.809673781 |
| 241180_at   | -0.00289066 | -0.11110339 | 0.911914243 | 0.95342889  |
| 241181_x_at | 0.108649197 | 2.655500836 | 0.01018435  | 0.03539614  |
| 241182_at   | -0.01501026 | -0.52701727 | 0.600172249 | 0.751783911 |
| 241183_at   | -0.00323904 | -0.13401895 | 0.893847075 | 0.943277768 |
| 241184_x_at | -0.0543796  | -2.50168111 | 0.015175582 | 0.049111303 |
| 241185_at   | -0.04522228 | -1.51894477 | 0.134156711 | 0.271340835 |
| 241186_at   | -0.03810542 | -1.75468511 | 0.084543458 | 0.191583826 |
| 241187_at   | -0.04557676 | -1.12818816 | 0.263840985 | 0.438678945 |
| 241188_at   | 0.004298439 | 0.205262639 | 0.838078702 | 0.910559246 |
| 241189_at   | 0.037035708 | 1.109265726 | 0.27184976  | 0.447771332 |
| 241190_at   | 0.016081398 | 0.540050737 | 0.591209769 | 0.745152063 |
| 241191_at   | -0.00114613 | -0.03875695 | 0.969215984 | 0.984459108 |
| 241192_at   | -0.01006913 | -0.38913297 | 0.698589076 | 0.821614289 |
| 241193_at   | 0.011214756 | 0.330687206 | 0.742060934 | 0.850494621 |
| 241194_at   | -0.02599185 | -0.84698812 | 0.400449624 | 0.582827844 |
| 241195_at   | 0.017972623 | 0.596872785 | 0.552892794 | 0.715357673 |
| 241196_at   | 0.06146003  | 1.844335409 | 0.070193816 | 0.166028158 |
| 241197_at   | -0.0364043  | -1.0107938  | 0.316273039 | 0.497461626 |
| 241198_s_at | 0.18798368  | 1.984559446 | 0.051884889 | 0.131260016 |
| 241199_x_at | -0.01829418 | -0.61725469 | 0.539459254 | 0.70520396  |
| 241200_x_at | -0.00725742 | -0.32231789 | 0.74835966  | 0.85492932  |
| 241201_at   | -0.03047563 | -1.08407734 | 0.282773218 | 0.460155137 |
| 241202_at   | -0.0437983  | -1.17695146 | 0.24397613  | 0.41495533  |
| 241203_at   | -0.00757965 | -0.21906571 | 0.827360523 | 0.904195886 |
| 241204_at   | -0.00336166 | -0.10786814 | 0.914468984 | 0.954358486 |
| 241205_at   | 0.096388903 | 2.06633023  | 0.043228908 | 0.113786816 |
| 241206_at   | -0.0453425  | -1.26248429 | 0.211778539 | 0.376783697 |
| 241207_at   | -0.04020155 | -1.04218233 | 0.30161022  | 0.481206766 |
| 241208_at   | -0.01521736 | -0.41469976 | 0.679876849 | 0.808135114 |
| 241209_at   | -0.00705073 | -0.31794945 | 0.751654221 | 0.857137438 |
| 241210_at   | 0.107394435 | 2.965621952 | 0.004365487 | 0.017635574 |
| 241211_at   | -0.02719553 | -0.67292769 | 0.503639985 | 0.675814514 |
| 241212_at   | 0.02648399  | 0.716320824 | 0.476639991 | 0.652390335 |
| 241213_x_at | 0.001351312 | 0.038025187 | 0.969796921 | 0.984801785 |
| 241214_at   | 0.032919888 | 0.753295509 | 0.454290012 | 0.633502737 |
| 241215_at   | 0.129872228 | 2.275568108 | 0.026546454 | 0.077280752 |
| 241216_at   | 0.13814303  | 3.176400679 | 0.002379737 | 0.010547972 |
| 241217_x_at | 0.029586097 | 0.954091081 | 0.343959017 | 0.52678854  |
| 241218_at   | 0.001845474 | 0.047877183 | 0.961977019 | 0.980739488 |
| 241219_at   | -0.00636203 | -0.25036746 | 0.803179405 | 0.889233631 |
| 241220_at   | -0.03606811 | -1.40307305 | 0.165874554 | 0.316773912 |
| 241221_at   | -0.02684146 | -1.03415471 | 0.305315326 | 0.485302793 |
| 241222_at   | -0.0131248  | -0.40067886 | 0.690114555 | 0.815510304 |
| 241223_x_at | 0.203766744 | 4.519688957 | 3.06E-05    | 0.000272945 |
| 241224_x_at | -0.06521669 | -1.789641   | 0.078682057 | 0.181250092 |
| 241225_at   | -0.04650969 | -1.80091215 | 0.076865972 | 0.177976066 |
| 241226_at   | 0.017327237 | 0.421106871 | 0.675218472 | 0.804845148 |
| 241227_at   | 0.048760017 | 0.919065114 | 0.361831366 | 0.545064292 |
| 241228_at   | 0.050593195 | 1.704529682 | 0.09358236  | 0.206997419 |
| 241229_at   | 0.019044069 | 0.548835053 | 0.585205046 | 0.74057654  |
| 241230_at   | -0.10816056 | -2.44673096 | 0.017437012 | 0.0551089   |
| 241231_at   | -0.04522896 | -1.06906195 | 0.289428284 | 0.467715102 |
| 241232_x_at | -0.05639127 | -1.92878075 | 0.058609034 | 0.14426144  |
| 241233_x_at | -0.34929326 | -3.7258792  | 0.000440046 | 0.002569107 |
| 241234_at   | -0.05767006 | -1.68655076 | 0.097010241 | 0.212684077 |
| 241235_at   | -0.04084067 | -1.71823178 | 0.091037355 | 0.202712445 |
| 241236_at   | 0.02243791  | 0.769878094 | 0.44446648  | 0.624657105 |
| 241237_at   | 0.067695664 | 1.9968066   | 0.050500496 | 0.12847041  |
| 241238_at   | -0.04573407 | -1.52900098 | 0.131647727 | 0.267594498 |
| 241239_at   | -0.02861012 | -0.87816441 | 0.383443029 | 0.566095265 |
| 241240_at   | -0.01404028 | -0.42653716 | 0.67128027  | 0.801990425 |
| 241241_at   | 0.047497298 | 1.616603223 | 0.111338349 | 0.236056056 |
| 241242_at   | 0.109904084 | 3.304425527 | 0.001627349 | 0.00767562  |
| 241243_at   | -0.00570889 | -0.19619737 | 0.845134887 | 0.914945215 |
| 241244_at   | 0.039421961 | 1.131040465 | 0.262648394 | 0.437263419 |
| 241245_at   | -0.03734867 | -0.88980505 | 0.377211118 | 0.559891042 |

|             |             |             |             |             |
|-------------|-------------|-------------|-------------|-------------|
| 241246_at   | -0.04589911 | -1.18281319 | 0.241662719 | 0.412024196 |
| 241247_at   | 0.051142311 | 1.8926079   | 0.063355536 | 0.153471471 |
| 241248_at   | -0.01281659 | -0.36234103 | 0.718401462 | 0.835222761 |
| 241249_at   | 0.072262478 | 1.783374065 | 0.079707228 | 0.183140993 |
| 241250_at   | -0.01798774 | -0.41488739 | 0.679740252 | 0.808127799 |
| 241251_at   | -0.01191768 | -0.33282864 | 0.740452121 | 0.849325929 |
| 241252_at   | -0.01388715 | -0.49156492 | 0.624864245 | 0.770069479 |
| 241253_at   | 0.015478546 | 0.610779078 | 0.543709042 | 0.708294066 |
| 241254_at   | -0.01220458 | -0.47882522 | 0.633845873 | 0.776710727 |
| 241255_at   | 0.51762028  | 2.887273085 | 0.005435785 | 0.021106525 |
| 241256_at   | -0.02527333 | -0.65475638 | 0.515187961 | 0.685526553 |
| 241257_at   | -0.03635876 | -1.19905999 | 0.235333593 | 0.404302643 |
| 241258_at   | -0.02137723 | -0.58788203 | 0.558871569 | 0.720602714 |
| 241259_at   | -0.02105975 | -0.84379474 | 0.402217492 | 0.584468207 |
| 241260_at   | -0.04503694 | -2.11115274 | 0.039037682 | 0.104799945 |
| 241261_x_at | -0.00969281 | -0.20184668 | 0.840736068 | 0.912415345 |
| 241262_at   | 0.067237422 | 1.392147055 | 0.16914185  | 0.321252078 |
| 241263_at   | -0.0068018  | -0.25065832 | 0.802955575 | 0.889051892 |
| 241264_at   | -0.00510004 | -0.21020158 | 0.834239925 | 0.908608733 |
| 241265_x_at | -0.08657746 | -3.73588439 | 0.00042617  | 0.002500509 |
| 241266_at   | -0.03256582 | -1.05294878 | 0.296689407 | 0.475763979 |
| 241267_at   | -0.01841608 | -0.62350201 | 0.535375521 | 0.701774536 |
| 241268_x_at | 0.180784107 | 5.35892919  | 1.48E-06    | 2.20E-05    |
| 241269_at   | 0.04897403  | 1.228786219 | 0.224066616 | 0.3912049   |
| 241270_at   | 0.090207061 | 2.174963766 | 0.033683292 | 0.09341444  |
| 241271_at   | 0.000339281 | 0.006778593 | 0.994614544 | 0.997404205 |
| 241272_at   | 0.157407345 | 2.351990129 | 0.022055816 | 0.066670175 |
| 241273_at   | -0.07538634 | -2.12635121 | 0.037699185 | 0.102081306 |
| 241274_at   | -0.01836488 | -0.83283464 | 0.408321477 | 0.590515596 |
| 241275_at   | -0.03470446 | -1.15462976 | 0.252931631 | 0.425907858 |
| 241276_at   | -0.07285697 | -2.75266795 | 0.007857686 | 0.028659476 |
| 241277_x_at | -0.08459028 | -2.09910136 | 0.04012827  | 0.107133371 |
| 241278_at   | -0.00911505 | -0.20720974 | 0.836564848 | 0.909883046 |
| 241279_at   | -0.06598926 | -1.92859722 | 0.05863233  | 0.14429494  |
| 241280_at   | -0.05439456 | -1.10175807 | 0.275074163 | 0.451423438 |
| 241281_at   | -0.05479118 | -1.44280365 | 0.154403049 | 0.300390957 |
| 241282_at   | -0.08234457 | -2.28150226 | 0.026170759 | 0.076490409 |
| 241283_at   | 0.019736223 | 0.649993639 | 0.518237881 | 0.687781164 |
| 241284_at   | -0.01282193 | -0.4557249  | 0.650273075 | 0.788101618 |
| 241285_at   | -0.09871313 | -3.34200921 | 0.001453242 | 0.006980684 |
| 241286_at   | -0.02191792 | -0.67886103 | 0.499899891 | 0.672563896 |
| 241287_x_at | 0.029995064 | 1.480030235 | 0.144224718 | 0.286081003 |
| 241288_at   | 0.049729314 | 1.510208631 | 0.136367002 | 0.274651377 |
| 241289_at   | -0.02003038 | -0.84986646 | 0.398860274 | 0.581196028 |
| 241290_at   | -0.01282613 | -0.45906055 | 0.647889963 | 0.786385438 |
| 241291_at   | -0.02504979 | -0.88605746 | 0.379210394 | 0.561832287 |
| 241292_at   | 0.016955952 | 0.471546097 | 0.639002803 | 0.780559031 |
| 241293_x_at | -0.03399119 | -1.20536295 | 0.232910879 | 0.401514098 |
| 241294_at   | 0.125221855 | 3.66429686  | 0.000535455 | 0.003034564 |
| 241295_at   | -0.05356226 | -1.39404276 | 0.168571439 | 0.320532451 |
| 241296_at   | -0.05951183 | -2.25273819 | 0.028036754 | 0.080642207 |
| 241297_at   | -0.0132181  | -0.28135526 | 0.779429624 | 0.87386881  |
| 241298_x_at | 0.067733622 | 2.017077253 | 0.048278889 | 0.124047379 |
| 241299_at   | 0.05473711  | 1.461795279 | 0.149142558 | 0.292996277 |
| 241300_at   | 0.031561157 | 1.023776549 | 0.310151044 | 0.4907513   |
| 241301_at   | 0.02526731  | 0.717101821 | 0.4761616   | 0.652079493 |
| 241302_at   | -0.05922732 | -2.24487984 | 0.028566589 | 0.081902616 |
| 241303_x_at | 0.187473561 | 4.361613434 | 5.30E-05    | 0.000433325 |
| 241304_at   | -0.00842484 | -0.31980164 | 0.750256777 | 0.856221135 |
| 241305_at   | -0.00542854 | -0.20122298 | 0.841221459 | 0.912720484 |
| 241306_at   | 3.48E-05    | 0.001372558 | 0.998909522 | 0.999490986 |
| 241307_at   | -0.00942903 | -0.28976086 | 0.773022588 | 0.870071411 |
| 241308_at   | -0.00647767 | -0.20918385 | 0.835030628 | 0.908960441 |
| 241309_at   | -0.105953   | -2.45287989 | 0.017169699 | 0.054402565 |
| 241310_at   | 0.747831636 | 3.274993874 | 0.001777247 | 0.008260917 |
| 241311_at   | -0.02401856 | -0.61486584 | 0.541025007 | 0.706444901 |
| 241312_at   | -0.02038643 | -0.66738659 | 0.50714647  | 0.678462299 |
| 241313_at   | -0.05875049 | -1.51268231 | 0.135738241 | 0.273718064 |
| 241314_at   | -0.04692392 | -1.286889   | 0.203196237 | 0.366002186 |
| 241315_at   | -0.09061005 | -2.27573351 | 0.026535917 | 0.077269722 |
| 241316_at   | -0.00263006 | -0.07646671 | 0.93930842  | 0.968323538 |
| 241317_at   | -0.07207259 | -1.60733343 | 0.113359721 | 0.239166911 |
| 241318_at   | -0.00400533 | -0.14957898 | 0.881610711 | 0.936690421 |
| 241319_at   | -0.01832633 | -0.58843623 | 0.558502101 | 0.720238225 |
| 241320_at   | -0.01633526 | -0.45754342 | 0.6489734   | 0.787080575 |

|             |             |             |             |             |
|-------------|-------------|-------------|-------------|-------------|
| 241321_at   | -0.01125788 | -0.31560103 | 0.75342726  | 0.858086469 |
| 241322_at   | -0.01848102 | -0.40940048 | 0.683739263 | 0.810914077 |
| 241323_at   | -0.04699579 | -1.70847088 | 0.092844401 | 0.205772475 |
| 241324_at   | -0.01462676 | -0.49025759 | 0.625783333 | 0.770773287 |
| 241325_at   | -0.06382583 | -1.48812191 | 0.142083698 | 0.28300916  |
| 241326_at   | 0.07951584  | 1.763252597 | 0.083074324 | 0.188944411 |
| 241327_at   | -0.00055667 | -0.01915539 | 0.984782258 | 0.992709774 |
| 241328_at   | -0.0105284  | -0.31269413 | 0.755623798 | 0.859580491 |
| 241329_s_at | 0.055358476 | 1.36133184  | 0.178623576 | 0.334214388 |
| 241330_x_at | 0.006177817 | 0.267858276 | 0.789749544 | 0.880296462 |
| 241331_at   | -0.06345405 | -1.4555523  | 0.150856098 | 0.295522956 |
| 241332_at   | -0.01751715 | -0.52125272 | 0.604156255 | 0.754701382 |
| 241333_x_at | -0.0052496  | -0.19041199 | 0.849644789 | 0.917513518 |
| 241334_at   | 0.006341456 | 0.226410872 | 0.821670235 | 0.900868095 |
| 241335_at   | -0.01077643 | -0.47824813 | 0.634254053 | 0.77703076  |
| 241336_at   | 0.148204124 | 3.559540774 | 0.000744723 | 0.003998459 |
| 241337_at   | -0.03853369 | -1.3205152  | 0.191800331 | 0.351165112 |
| 241338_at   | -0.04723872 | -1.58156264 | 0.119135431 | 0.24810814  |
| 241339_at   | 0.000856515 | 0.023491009 | 0.981338466 | 0.990588176 |
| 241340_at   | 0.002553431 | 0.091393695 | 0.927491656 | 0.962062457 |
| 241341_at   | -0.1819446  | -4.67667334 | 1.76E-05    | 0.000171345 |
| 241342_at   | 0.193364204 | 3.234401793 | 0.002005442 | 0.009128866 |
| 241343_at   | -0.14525489 | -2.06878983 | 0.042989188 | 0.113255881 |
| 241344_at   | 0.004988797 | 0.099935857 | 0.920736556 | 0.958276449 |
| 241345_at   | -0.04491763 | -1.83651947 | 0.071357484 | 0.168078678 |
| 241346_at   | 0.037073661 | 0.701166443 | 0.485975892 | 0.660741522 |
| 241347_at   | 0.201461168 | 6.018605785 | 1.23E-07    | 2.98E-06    |
| 241348_at   | 0.04269661  | 0.948954708 | 0.34654313  | 0.529548521 |
| 241349_at   | -0.05421932 | -1.82108182 | 0.073703581 | 0.172312703 |
| 241350_at   | -0.06079913 | -1.79516002 | 0.077788368 | 0.179627867 |
| 241351_at   | 0.158107434 | 4.850606226 | 9.47E-06    | 0.000102131 |
| 241352_at   | -0.02972509 | -1.15753615 | 0.251752453 | 0.424638268 |
| 241353_s_at | 0.238351102 | 5.552310865 | 7.19E-07    | 1.22E-05    |
| 241354_at   | 0.010017815 | 0.277844772 | 0.782110026 | 0.875449227 |
| 241355_at   | 0.036736199 | 1.167002828 | 0.247938928 | 0.420064694 |
| 241356_at   | 0.005955522 | 0.163024408 | 0.871060445 | 0.930391315 |
| 241357_at   | 0.017669504 | 0.44519927  | 0.657816965 | 0.792985807 |
| 241358_at   | 0.018574198 | 0.511371048 | 0.611013886 | 0.759910962 |
| 241359_at   | 0.193254345 | 4.297124972 | 6.62E-05    | 0.000520148 |
| 241360_at   | 0.101958644 | 3.165055633 | 0.002460233 | 0.010846674 |
| 241361_at   | -0.04982787 | -1.35751367 | 0.179826123 | 0.335859797 |
| 241362_at   | 0.030364694 | 1.200284767 | 0.234861389 | 0.403770779 |
| 241363_at   | 0.068236055 | 1.792857293 | 0.07816021  | 0.180262985 |
| 241364_at   | 0.006933381 | 0.14757964  | 0.883181426 | 0.937490067 |
| 241365_at   | -0.00675719 | -0.14090335 | 0.888429818 | 0.940136038 |
| 241366_at   | -0.04222112 | -1.46026396 | 0.149561451 | 0.293611795 |
| 241367_at   | 0.059945568 | 1.464458676 | 0.148416177 | 0.292082356 |
| 241368_at   | 0.204210154 | 4.890546601 | 8.20E-06    | 9.05E-05    |
| 241369_at   | -0.01721708 | -0.60203744 | 0.549472946 | 0.712624635 |
| 241370_at   | 0.052199531 | 1.307519875 | 0.196145947 | 0.356840945 |
| 241371_at   | -0.03717353 | -1.01149809 | 0.315938862 | 0.497224808 |
| 241372_at   | 0.047034946 | 1.217723964 | 0.228212388 | 0.395681066 |
| 241373_at   | 0.036737575 | 1.142296892 | 0.257979204 | 0.431739622 |
| 241374_at   | 0.054860523 | 1.352467888 | 0.181424767 | 0.337955805 |
| 241375_at   | 0.005224892 | 0.156484962 | 0.876188954 | 0.933553792 |
| 241376_at   | -0.09984282 | -1.97721336 | 0.052730802 | 0.132925998 |
| 241377_s_at | 0.034628528 | 0.976681911 | 0.332743785 | 0.515387303 |
| 241378_at   | 0.045011193 | 1.046249653 | 0.299744734 | 0.47905134  |
| 241379_at   | -0.02732096 | -1.17801467 | 0.24355534  | 0.414365802 |
| 241380_at   | 0.096344242 | 1.939209174 | 0.057298209 | 0.141901698 |
| 241381_at   | 0.052181198 | 1.564685974 | 0.123044364 | 0.254379965 |
| 241382_at   | -1.42285048 | -8.04878229 | 4.75E-11    | 1.38E-08    |
| 241383_at   | -0.07160375 | -1.81884037 | 0.07404954  | 0.172951242 |
| 241384_x_at | -0.03017424 | -1.0021836  | 0.320377746 | 0.502132991 |
| 241385_at   | 0.33241516  | 4.430949355 | 4.17E-05    | 0.000354228 |
| 241386_at   | 0.040664141 | 1.763722168 | 0.08299442  | 0.188831879 |
| 241387_at   | 0.403763236 | 4.995943299 | 5.60E-06    | 6.61E-05    |
| 241388_at   | 0.120994977 | 3.626310071 | 0.000603848 | 0.003354522 |
| 241389_at   | -0.17062398 | -5.08525259 | 4.05E-06    | 5.06E-05    |
| 241390_at   | -0.05413581 | -2.01986474 | 0.047980072 | 0.123492593 |
| 241391_at   | 0.056309755 | 1.20703329  | 0.232271891 | 0.40075263  |
| 241392_at   | -0.00024483 | -0.00586626 | 0.995339365 | 0.997862376 |
| 241393_at   | 0.144778112 | 4.071338577 | 0.00014207  | 0.000990049 |
| 241394_at   | 0.021131804 | 0.610297162 | 0.544025995 | 0.708510588 |
| 241395_at   | 0.140927944 | 4.100832001 | 0.000128714 | 0.000913236 |

|             |             |             |             |             |
|-------------|-------------|-------------|-------------|-------------|
| 241396_at   | 0.119337408 | 1.628925259 | 0.108696684 | 0.231866993 |
| 241397_at   | 0.078830249 | 2.257471881 | 0.027721803 | 0.079878448 |
| 241398_at   | -0.05638676 | -1.9314048  | 0.058276816 | 0.143657334 |
| 241399_at   | -0.0908049  | -2.44989199 | 0.017299129 | 0.054742807 |
| 241400_at   | -0.0055473  | -0.20389436 | 0.839142892 | 0.911195251 |
| 241401_at   | 0.050261993 | 0.832927693 | 0.408269416 | 0.590459412 |
| 241402_at   | 0.065317323 | 1.985613489 | 0.051764474 | 0.131056158 |
| 241403_at   | 0.024340015 | 0.33827019  | 0.736369251 | 0.846816112 |
| 241404_at   | 0.00539526  | 0.153634194 | 0.878426331 | 0.934828889 |
| 241405_at   | 0.012123037 | 0.309992061 | 0.75766738  | 0.860634656 |
| 241406_at   | 0.045687026 | 1.361507859 | 0.178568287 | 0.334152906 |
| 241407_at   | -0.09005805 | -2.65793859 | 0.010118998 | 0.035221049 |
| 241408_at   | 0.012503878 | 0.232027397 | 0.817325587 | 0.898006451 |
| 241409_at   | -0.04670765 | -1.13861822 | 0.259498587 | 0.433632861 |
| 241410_at   | -0.18224492 | -3.98178561 | 0.000191338 | 0.001269299 |
| 241411_at   | 0.043346508 | 1.725027863 | 0.089796398 | 0.20060888  |
| 241412_at   | 0.180522534 | 2.495148674 | 0.015429797 | 0.049811361 |
| 241413_at   | 0.04399244  | 1.141260973 | 0.258406423 | 0.432280364 |
| 241414_at   | 0.016310824 | 0.530009122 | 0.598109327 | 0.750293375 |
| 241415_at   | -0.02813441 | -0.88406319 | 0.380277027 | 0.563001983 |
| 241416_at   | -0.11814016 | -3.4215213  | 0.001141209 | 0.005685308 |
| 241417_at   | -0.41454761 | -8.38477913 | 1.30E-11    | 6.24E-09    |
| 241418_at   | 0.070686285 | 1.87720482  | 0.065473481 | 0.157528613 |
| 241419_at   | 0.162724596 | 4.823457954 | 1.04E-05    | 0.000110595 |
| 241420_at   | -0.04200908 | -1.29839278 | 0.19924199  | 0.360740684 |
| 241421_at   | 0.242025613 | 4.958668693 | 6.41E-06    | 7.40E-05    |
| 241422_at   | 0.045865402 | 1.334737799 | 0.187127996 | 0.345127287 |
| 241423_at   | 0.051518052 | 1.538448222 | 0.129324797 | 0.264146239 |
| 241424_at   | 0.023442205 | 0.718701675 | 0.475182472 | 0.651117704 |
| 241425_at   | 0.087360691 | 1.47050211  | 0.146778246 | 0.289616484 |
| 241426_at   | 0.013036602 | 0.564098537 | 0.574841023 | 0.732480422 |
| 241427_x_at | -0.11156489 | -2.05143166 | 0.044705874 | 0.116917018 |
| 241428_x_at | -0.15370958 | -3.42999356 | 0.001111989 | 0.005565174 |
| 241429_at   | -0.01916679 | -0.49542014 | 0.622157414 | 0.767852069 |
| 241430_at   | -0.0322667  | -1.15661295 | 0.252126587 | 0.425032682 |
| 241431_at   | 0.022168559 | 0.700551303 | 0.486356982 | 0.660978137 |
| 241432_at   | 0.032315114 | 0.832656494 | 0.408421157 | 0.590602419 |
| 241433_at   | 0.08184549  | 1.891133445 | 0.063555731 | 0.153869595 |
| 241434_at   | 0.118473814 | 2.980726389 | 0.004183131 | 0.017028191 |
| 241435_at   | 0.185160008 | 4.292921992 | 6.71E-05    | 0.000526575 |
| 241436_at   | 0.001401208 | 0.057916419 | 0.95401236  | 0.976304669 |
| 241437_s_at | -0.02134977 | -0.64872555 | 0.519051539 | 0.688432564 |
| 241438_at   | 0.077802361 | 2.064056426 | 0.04345155  | 0.114273122 |
| 241439_at   | -0.04259657 | -1.28360369 | 0.204336202 | 0.367387401 |
| 241440_at   | 0.114496787 | 2.684850658 | 0.00942257  | 0.03326331  |
| 241441_at   | 0.020356005 | 0.633546015 | 0.528843642 | 0.696416189 |
| 241442_at   | 0.047873505 | 1.231825594 | 0.222937289 | 0.390072007 |
| 241443_at   | 0.054061282 | 1.839627619 | 0.070892802 | 0.167238909 |
| 241444_at   | 0.001311051 | 0.032716427 | 0.974011969 | 0.986835428 |
| 241445_at   | 0.037132819 | 0.985387018 | 0.328487499 | 0.511026291 |
| 241446_at   | -0.00584364 | -0.2327036  | 0.816802895 | 0.897722357 |
| 241447_at   | 0.056720714 | 1.917973497 | 0.059994345 | 0.147055737 |
| 241448_at   | -0.00608144 | -0.09487251 | 0.924739952 | 0.960568923 |
| 241449_at   | -0.01884735 | -0.44579837 | 0.657386613 | 0.79265277  |
| 241450_at   | 0.003893788 | 0.106032129 | 0.91591921  | 0.95529198  |
| 241451_s_at | 0.008496124 | 0.268290034 | 0.78941882  | 0.880015612 |
| 241452_at   | -0.01240459 | -0.48979676 | 0.626107449 | 0.770938784 |
| 241453_at   | 0.031473734 | 0.740506304 | 0.461951362 | 0.640111936 |
| 241454_at   | -0.00380056 | -0.08180464 | 0.935081001 | 0.966191533 |
| 241455_at   | -0.09803363 | -2.47897396 | 0.016075872 | 0.051506407 |
| 241456_at   | -0.27995639 | -4.74284202 | 1.39E-05    | 0.000140636 |
| 241457_at   | 0.794442252 | 9.312816715 | 3.70E-13    | 1.84E-09    |
| 241458_at   | 0.009143886 | 0.210247885 | 0.834203955 | 0.908591698 |
| 241459_at   | 0.359308644 | 5.07184054  | 4.25E-06    | 5.28E-05    |
| 241460_at   | 0.079352045 | 1.898346575 | 0.062581446 | 0.152046208 |
| 241461_at   | -0.03310764 | -1.10129543 | 0.275273731 | 0.451668022 |
| 241462_at   | -0.0203556  | -0.53516729 | 0.594560482 | 0.747625262 |
| 241463_at   | -0.00904014 | -0.24119198 | 0.810248752 | 0.893452683 |
| 241464_s_at | 0.077466401 | 1.864520304 | 0.067262294 | 0.160834554 |
| 241465_at   | -0.02630095 | -0.85932289 | 0.393666138 | 0.576371075 |
| 241466_at   | -0.04440962 | -1.22034187 | 0.227226255 | 0.394775144 |
| 241467_at   | 0.052238559 | 1.483120684 | 0.143404024 | 0.28480369  |
| 241468_at   | -0.01133217 | -0.27969529 | 0.780696749 | 0.87469977  |
| 241469_at   | 0.035671113 | 1.121490658 | 0.266656354 | 0.441958307 |
| 241470_x_at | 0.530525162 | 3.392486627 | 0.001246964 | 0.006132186 |



|             |             |             |             |             |
|-------------|-------------|-------------|-------------|-------------|
| 241471_at   | -0.00414452 | -0.1021266  | 0.919005049 | 0.957214823 |
| 241472_at   | 0.201074504 | 3.731262439 | 0.000432527 | 0.002532821 |
| 241473_at   | 0.050895    | 1.13853566  | 0.259532759 | 0.4336575   |
| 241474_at   | -0.02997292 | -0.89584524 | 0.374002836 | 0.557090213 |
| 241475_at   | 0.031301063 | 0.790651542 | 0.432337434 | 0.613202938 |
| 241476_at   | 0.02571206  | 0.678374459 | 0.500206029 | 0.672842975 |
| 241477_at   | 0.025582057 | 0.68621451  | 0.495285663 | 0.668461197 |
| 241478_at   | -0.02494117 | -0.60326042 | 0.548664703 | 0.711920783 |
| 241479_at   | 0.012455582 | 0.458567879 | 0.648241716 | 0.786556044 |
| 241480_at   | 0.003521755 | 0.113893699 | 0.909711604 | 0.952345213 |
| 241481_at   | -0.03724653 | -1.18371443 | 0.241308443 | 0.411561476 |
| 241482_at   | -0.0519445  | -1.61003642 | 0.112767266 | 0.238310699 |
| 241483_at   | -0.01404246 | -0.66521626 | 0.508523463 | 0.679677592 |
| 241484_x_at | -0.20871531 | -2.92736611 | 0.004860929 | 0.019279785 |
| 241485_at   | -0.01449093 | -0.44888564 | 0.655170762 | 0.791076125 |
| 241486_at   | -0.01706596 | -0.38433206 | 0.702124321 | 0.824058934 |
| 241487_at   | -0.01812597 | -0.38876123 | 0.698862577 | 0.821806196 |
| 241488_at   | -0.04061673 | -0.93634367 | 0.352941389 | 0.536099533 |
| 241489_at   | 0.238745351 | 3.822281232 | 0.000322584 | 0.001978442 |
| 241490_s_at | 0.017534091 | 0.424017515 | 0.673106445 | 0.803367261 |
| 241491_at   | -0.0055923  | -0.15453504 | 0.87771921  | 0.934606695 |
| 241492_at   | -0.01121834 | -0.44426959 | 0.658485015 | 0.793555677 |
| 241493_at   | -0.03116501 | -0.73647277 | 0.464382905 | 0.642127434 |
| 241494_at   | 0.067009275 | 1.843748385 | 0.070280657 | 0.166156569 |
| 241495_at   | -0.02007446 | -0.71680638 | 0.476342539 | 0.652207369 |
| 241496_at   | -0.02254128 | -0.73067278 | 0.467892102 | 0.645004128 |
| 241497_at   | 0.016856704 | 0.624027646 | 0.535032652 | 0.701472258 |
| 241498_at   | -0.03165714 | -1.06766459 | 0.290053075 | 0.468318353 |
| 241499_at   | 0.036962986 | 1.206635739 | 0.232423858 | 0.400937435 |
| 241500_at   | -0.64483921 | -5.97568259 | 1.45E-07    | 3.36E-06    |
| 241501_at   | 0.009100047 | 0.261462002 | 0.794653563 | 0.883251437 |
| 241502_x_at | 0.054114004 | 1.955899864 | 0.055252298 | 0.137990259 |
| 241503_at   | 0.024253118 | 0.630767399 | 0.530646477 | 0.697806518 |
| 241504_at   | -0.05694503 | -1.43135372 | 0.157643763 | 0.30498312  |
| 241505_at   | -0.0923309  | -2.1109859  | 0.039052603 | 0.104799984 |
| 241506_at   | -0.03458204 | -0.70919178 | 0.48101926  | 0.656278437 |
| 241507_x_at | -0.02186678 | -0.74813742 | 0.457371081 | 0.63612775  |
| 241508_at   | 0.162706053 | 3.684491908 | 0.000502175 | 0.002876229 |
| 241509_at   | 0.09766931  | 1.409480394 | 0.16398129  | 0.314062645 |
| 241510_at   | -0.0536011  | -2.11746656 | 0.03847669  | 0.103665313 |
| 241511_at   | -0.0637232  | -1.3727077  | 0.175077083 | 0.329385182 |
| 241512_at   | 0.07919812  | 2.653533671 | 0.010237366 | 0.035530665 |
| 241513_at   | -0.06937359 | -2.03711884 | 0.046165691 | 0.119899877 |
| 241514_at   | 0.009776742 | 0.305749483 | 0.760879554 | 0.862332734 |
| 241515_at   | 0.002795748 | 0.075455571 | 0.940109404 | 0.96863172  |
| 241516_at   | -0.05568125 | -1.51329134 | 0.135583791 | 0.273530032 |
| 241517_at   | -0.05372764 | -1.73231885 | 0.088480638 | 0.198393372 |
| 241518_at   | -0.01754109 | -0.46093932 | 0.646549332 | 0.785568951 |
| 241519_at   | 0.035178475 | 1.295422764 | 0.200257322 | 0.362153533 |
| 241520_x_at | 0.124717474 | 3.402448802 | 0.001209673 | 0.005975762 |
| 241521_at   | -0.11713428 | -2.58183192 | 0.012350375 | 0.041420002 |
| 241522_at   | -0.09038522 | -1.84861165 | 0.06956394  | 0.164977748 |
| 241523_at   | -0.07071352 | -1.96474049 | 0.054194159 | 0.135889996 |
| 241524_at   | 0.059581198 | 2.003724996 | 0.049732576 | 0.126943189 |
| 241525_at   | 0.054614423 | 1.715390363 | 0.091560372 | 0.203633548 |
| 241526_at   | -0.00087104 | -0.02400729 | 0.980928407 | 0.990424012 |
| 241527_at   | 0.039243294 | 1.243555402 | 0.218618074 | 0.385270522 |
| 241528_at   | -0.01848237 | -0.59425973 | 0.55462713  | 0.716958195 |
| 241529_at   | 0.018056753 | 0.426148014 | 0.671562181 | 0.802198561 |
| 241530_at   | 0.044587171 | 1.27303388  | 0.208036181 | 0.372036053 |
| 241531_at   | -0.02574493 | -0.53477936 | 0.594827034 | 0.747813085 |
| 241532_at   | 0.024726411 | 0.820275736 | 0.41538504  | 0.597583893 |
| 241533_at   | -0.03152457 | -1.00831287 | 0.317452115 | 0.498824622 |
| 241534_at   | 0.018217651 | 0.892145302 | 0.375966017 | 0.558780052 |
| 241535_at   | 0.125689125 | 1.235548989 | 0.221559504 | 0.388530944 |
| 241536_at   | 0.045846511 | 1.116675492 | 0.268693519 | 0.444148787 |
| 241537_at   | -0.07056012 | -2.20197563 | 0.031618141 | 0.088811386 |
| 241538_at   | 0.085613142 | 1.742362853 | 0.086694199 | 0.195361848 |
| 241539_at   | -0.05183022 | -1.54123896 | 0.128644882 | 0.263142344 |
| 241540_at   | -0.00529903 | -0.19857037 | 0.843286543 | 0.913878652 |
| 241541_at   | 0.026429761 | 0.871837529 | 0.386857152 | 0.569555272 |
| 241542_at   | 0.204824595 | 3.475794294 | 0.000965924 | 0.004953992 |
| 241543_at   | -0.00423567 | -0.11165342 | 0.911480005 | 0.953153268 |
| 241544_at   | -0.03317151 | -1.33828725 | 0.185975503 | 0.343704166 |
| 241545_x_at | 0.009324502 | 0.427110698 | 0.670864857 | 0.801759378 |

|             |             |             |             |             |
|-------------|-------------|-------------|-------------|-------------|
| 241546_at   | 0.004965654 | 0.18343424  | 0.855090902 | 0.920749851 |
| 241547_at   | -0.03252021 | -0.7858803  | 0.435105711 | 0.615741884 |
| 241548_at   | -0.0265239  | -0.67848367 | 0.50013731  | 0.672811289 |
| 241549_at   | 0.004264921 | 0.153176774 | 0.878785422 | 0.93501563  |
| 241550_at   | -0.02899863 | -0.7426036  | 0.46068993  | 0.639057494 |
| 241551_at   | -0.01489108 | -0.52497223 | 0.601584227 | 0.752856246 |
| 241552_at   | -0.0650659  | -1.64733951 | 0.104843962 | 0.225663953 |
| 241553_at   | -0.03536357 | -0.85825663 | 0.394249695 | 0.576979742 |
| 241554_at   | 0.021145565 | 0.938757844 | 0.351710652 | 0.534939166 |
| 241555_at   | -0.05662606 | -1.87318182 | 0.066036411 | 0.158494845 |
| 241556_at   | 0.040821316 | 1.218064015 | 0.228084119 | 0.395580961 |
| 241557_x_at | 0.132276999 | 3.238042348 | 0.001983901 | 0.009050168 |
| 241558_at   | 0.066876312 | 1.435073638 | 0.156585152 | 0.30334216  |
| 241559_at   | -0.01554318 | -0.56406761 | 0.574861934 | 0.732480422 |
| 241560_at   | -0.01469768 | -0.52574895 | 0.601047762 | 0.752416643 |
| 241561_at   | 0.092691727 | 2.173727273 | 0.033780596 | 0.09362039  |
| 241562_x_at | -0.10114273 | -3.85983712 | 0.000285523 | 0.001786197 |
| 241563_at   | -0.0218099  | -0.91064404 | 0.366215821 | 0.549538913 |
| 241564_at   | -0.00813381 | -0.32799876 | 0.744082345 | 0.851798142 |
| 241565_at   | -0.01293769 | -0.35716707 | 0.722250541 | 0.837627703 |
| 241566_at   | -0.00448055 | -0.14174027 | 0.887771619 | 0.939710747 |
| 241567_at   | -0.01257865 | -0.5033233  | 0.616624835 | 0.764168181 |
| 241568_at   | -0.01804248 | -0.52937095 | 0.598549077 | 0.750550078 |
| 241569_at   | -0.01620819 | -0.68809673 | 0.494108352 | 0.667614671 |
| 241570_at   | -0.08134605 | -1.93012928 | 0.058438102 | 0.143980887 |
| 241571_at   | -0.04721518 | -1.18342755 | 0.241421174 | 0.41172232  |
| 241572_at   | -0.05229177 | -1.53661005 | 0.129774198 | 0.264894655 |
| 241573_at   | -0.0183178  | -0.63686395 | 0.526695077 | 0.694916472 |
| 241574_s_at | 0.013064695 | 0.469379476 | 0.640541235 | 0.781540149 |
| 241575_at   | 0.03806348  | 1.147215302 | 0.255957681 | 0.429401678 |
| 241576_at   | -0.00938079 | -0.24960879 | 0.803763318 | 0.889549557 |
| 241577_at   | -0.0127022  | -0.42895374 | 0.669530656 | 0.800949278 |
| 241578_x_at | -0.04441659 | -2.46561604 | 0.016627714 | 0.052947966 |
| 241579_at   | -0.00023334 | -0.00724571 | 0.994243438 | 0.997322973 |
| 241580_at   | 0.018403431 | 0.580723374 | 0.563654942 | 0.724302646 |
| 241581_at   | 0.054401049 | 1.345966843 | 0.183500398 | 0.340615517 |
| 241582_at   | 0.004369841 | 0.133023753 | 0.894630607 | 0.943774889 |
| 241583_x_at | -0.0134662  | -0.50290085 | 0.616920008 | 0.764427998 |
| 241584_at   | -0.02155111 | -0.50762606 | 0.613622034 | 0.761862527 |
| 241585_at   | -0.50693952 | -4.58835674 | 2.41E-05    | 0.000223097 |
| 241586_at   | 0.202346178 | 2.944638855 | 0.004631101 | 0.01852109  |
| 241587_at   | -0.02151281 | -0.79598055 | 0.429257941 | 0.610308349 |
| 241588_at   | -0.02141089 | -0.54734036 | 0.586224722 | 0.741294041 |
| 241589_at   | 0.004820727 | 0.178087693 | 0.859268675 | 0.923335231 |
| 241590_at   | -0.000682   | -0.02799702 | 0.977759715 | 0.988756034 |
| 241591_at   | 0.027538604 | 0.799977035 | 0.426957086 | 0.608235563 |
| 241592_at   | -0.0062004  | -0.19502533 | 0.846048114 | 0.915420526 |
| 241593_x_at | 0.025444438 | 0.601898193 | 0.549565013 | 0.712661315 |
| 241594_at   | 0.041075111 | 1.529787246 | 0.131453139 | 0.26742417  |
| 241595_at   | 0.048133392 | 1.222469371 | 0.226427149 | 0.393975596 |
| 241596_at   | -0.13756015 | -3.704138   | 0.000471704 | 0.002726863 |
| 241597_at   | -0.09826289 | -2.58946976 | 0.012107779 | 0.040786959 |
| 241598_at   | -0.05211895 | -1.49163333 | 0.141162418 | 0.28166938  |
| 241599_at   | 0.030029501 | 0.725480185 | 0.471046547 | 0.647515142 |
| 241600_at   | -0.54119079 | -5.74857072 | 3.43E-07    | 6.69E-06    |
| 241601_at   | -0.32925343 | -6.2533846  | 5.02E-08    | 1.47E-06    |
| 241602_at   | -0.01981818 | -0.58964433 | 0.557697122 | 0.7196362   |
| 241603_at   | -0.0631516  | -1.38860968 | 0.170210208 | 0.322714857 |
| 241604_at   | 0.017586596 | 0.560238528 | 0.577453573 | 0.73454517  |
| 241605_at   | -0.0269436  | -0.78250512 | 0.43707031  | 0.617622484 |
| 241606_s_at | -0.03885244 | -1.33102736 | 0.188338538 | 0.346573308 |
| 241607_at   | 0.118356218 | 4.085347729 | 0.000135567 | 0.000952909 |
| 241608_at   | -0.01675737 | -0.62306345 | 0.535661676 | 0.702024379 |
| 241609_at   | -0.00726468 | -0.19992811 | 0.842229391 | 0.913370603 |
| 241610_x_at | 0.040664247 | 1.07305567  | 0.287647726 | 0.465814631 |
| 241611_s_at | -0.03910487 | -1.14232733 | 0.25796666  | 0.431734795 |
| 241612_at   | 0.010762168 | 0.422897102 | 0.673919129 | 0.803961074 |
| 241613_at   | -0.01430303 | -0.29505603 | 0.768994531 | 0.867753094 |
| 241614_at   | -0.06972288 | -2.02610949 | 0.04731642  | 0.122129105 |
| 241615_x_at | -0.0157007  | -0.48140388 | 0.632023359 | 0.775424491 |
| 241616_at   | 0.062684278 | 2.315664222 | 0.024098259 | 0.071618526 |
| 241617_x_at | 0.015796793 | 0.248829399 | 0.804363287 | 0.889728839 |
| 241618_at   | -0.05755943 | -1.13037609 | 0.262925839 | 0.437576585 |
| 241619_at   | 0.073947202 | 1.796024728 | 0.077649119 | 0.179389734 |
| 241620_at   | 0.034521368 | 1.395167115 | 0.168233822 | 0.320076584 |

|             |             |             |             |             |
|-------------|-------------|-------------|-------------|-------------|
| 241621_at   | -0.0043211  | -0.14512624 | 0.885109501 | 0.938466794 |
| 241622_at   | 0.009715126 | 0.246477282 | 0.806174654 | 0.890916586 |
| 241623_at   | -0.06814451 | -2.14553254 | 0.036067219 | 0.098574211 |
| 241624_at   | 0.059756779 | 1.892563746 | 0.063361523 | 0.153471471 |
| 241625_at   | 0.034050063 | 0.893924889 | 0.375020957 | 0.55817886  |
| 241626_at   | 0.047201115 | 1.633886333 | 0.107647563 | 0.230212695 |
| 241627_x_at | 0.294967727 | 5.017971032 | 5.17E-06    | 6.19E-05    |
| 241628_at   | 0.00349333  | 0.096155284 | 0.923725521 | 0.960095374 |
| 241629_at   | 0.002292529 | 0.051005467 | 0.959494729 | 0.979236337 |
| 241630_at   | 0.11489832  | 4.159997093 | 0.000105483 | 0.000770592 |
| 241631_at   | 0.015578216 | 0.410199953 | 0.683156016 | 0.810544989 |
| 241632_x_at | -0.01348227 | -0.32220204 | 0.74844697  | 0.854930684 |
| 241633_x_at | 0.038146534 | 0.806328089 | 0.423315863 | 0.604989425 |
| 241634_at   | -0.00403732 | -0.12200934 | 0.903309306 | 0.94867112  |
| 241635_at   | -0.03107472 | -1.29146076 | 0.201617803 | 0.363869872 |
| 241636_x_at | -0.03837568 | -0.68021699 | 0.499047283 | 0.671911224 |
| 241637_at   | 0.01165893  | 0.427593436 | 0.670515294 | 0.801612218 |
| 241638_at   | -0.00847427 | -0.3247134  | 0.746555019 | 0.853456717 |
| 241639_at   | -0.06029084 | -2.24044222 | 0.028869679 | 0.082595701 |
| 241640_at   | -0.07612623 | -1.44613704 | 0.15346941  | 0.299082321 |
| 241641_at   | 0.063195462 | 1.316963871 | 0.192980613 | 0.352719187 |
| 241642_x_at | 0.045079199 | 1.731424844 | 0.088641111 | 0.198653522 |
| 241643_at   | -0.05237658 | -2.03155102 | 0.046744599 | 0.12103825  |
| 241644_at   | -0.00130544 | -0.0354959  | 0.97180502  | 0.985727566 |
| 241645_at   | -0.05339601 | -1.6940122  | 0.095575332 | 0.210250675 |
| 241646_s_at | -0.00188798 | -0.05543063 | 0.955984063 | 0.977385549 |
| 241647_x_at | -0.01628098 | -0.8732814  | 0.386076335 | 0.568761696 |
| 241648_at   | 0.000857197 | 0.031937895 | 0.974630173 | 0.987265038 |
| 241649_at   | 0.010478505 | 0.461704718 | 0.6460035   | 0.785161905 |
| 241650_x_at | 0.004765283 | 0.140132064 | 0.889036475 | 0.940555301 |
| 241651_at   | -0.01597634 | -0.64677881 | 0.520301967 | 0.689382818 |
| 241652_x_at | 0.019519551 | 1.106462757 | 0.273050466 | 0.449042223 |
| 241653_x_at | -0.05107204 | -2.02693673 | 0.047229102 | 0.12198122  |
| 241654_at   | -0.03593698 | -0.91113357 | 0.365960018 | 0.549265713 |
| 241655_at   | 0.008424899 | 0.306247041 | 0.760502619 | 0.862124164 |
| 241656_at   | 0.007834237 | 0.321784548 | 0.748761638 | 0.855104388 |
| 241657_at   | -0.04547659 | -1.55166501 | 0.126129926 | 0.259388124 |
| 241658_at   | -0.18167506 | -4.37820042 | 5.01E-05    | 0.000412289 |
| 241659_at   | 0.012617462 | 0.323075916 | 0.747788452 | 0.854538891 |
| 241660_at   | 0.007884286 | 0.235260077 | 0.814827554 | 0.8963412   |
| 241661_at   | -0.09629083 | -2.25519623 | 0.027872819 | 0.080248148 |
| 241662_x_at | -0.10478628 | -1.61494416 | 0.111697966 | 0.236632797 |
| 241663_at   | -0.09153281 | -2.69566609 | 0.009155257 | 0.032505107 |
| 241664_x_at | -0.00890411 | -0.16951401 | 0.865976518 | 0.927595963 |
| 241665_x_at | -0.08879295 | -3.02832645 | 0.00365378  | 0.015177499 |
| 241666_at   | -0.08374594 | -2.22256506 | 0.03011964  | 0.085391205 |
| 241667_x_at | 0.009870186 | 0.311637689 | 0.756422579 | 0.85978889  |
| 241668_s_at | -0.05670959 | -1.44060762 | 0.155020541 | 0.301290629 |
| 241669_x_at | -0.08335576 | -1.08960336 | 0.280350987 | 0.457562953 |
| 241670_x_at | 0.039061557 | 0.686821184 | 0.494906026 | 0.668322792 |
| 241671_x_at | -0.02664778 | -0.45765915 | 0.648890731 | 0.787044388 |
| 241672_at   | -0.00602132 | -0.11205461 | 0.911163283 | 0.952978153 |
| 241673_x_at | 0.021028948 | 0.641423915 | 0.523749706 | 0.692363401 |
| 241674_s_at | -0.01351031 | -0.65938509 | 0.512233054 | 0.683018159 |
| 241675_s_at | -0.0193894  | -0.52777371 | 0.599650359 | 0.751319704 |
| 241676_x_at | 0.042025019 | 0.894423604 | 0.374756382 | 0.557933716 |
| 241677_x_at | -0.07343169 | -2.00305218 | 0.049806813 | 0.127096386 |
| 241678_at   | -0.06010273 | -2.06237014 | 0.043617305 | 0.114586446 |
| 241679_at   | -0.05113075 | -1.07721377 | 0.285801953 | 0.463631974 |
| 241680_at   | 0.100780424 | 2.480866799 | 0.015999025 | 0.051296968 |
| 241681_at   | 0.267379553 | 3.072481219 | 0.003219233 | 0.013634758 |
| 241682_at   | -0.06272339 | -1.38630226 | 0.170909885 | 0.323738458 |
| 241683_at   | 0.04449349  | 1.649548124 | 0.104389424 | 0.224967313 |
| 241684_at   | 0.068919052 | 2.431554856 | 0.018112852 | 0.056874839 |
| 241685_x_at | 0.052090618 | 1.156937725 | 0.251994926 | 0.424858805 |
| 241686_x_at | 0.19153598  | 5.031158392 | 4.93E-06    | 5.95E-05    |
| 241687_at   | -0.29106914 | -5.24280981 | 2.27E-06    | 3.14E-05    |
| 241688_at   | 0.074605107 | 2.401591372 | 0.019516691 | 0.060404768 |
| 241689_at   | 0.148018273 | 2.968084846 | 0.004335257 | 0.017538817 |
| 241690_at   | 0.002071122 | 0.046012579 | 0.963456761 | 0.981243759 |
| 241691_at   | -0.00130548 | -0.02875048 | 0.977161341 | 0.988552746 |
| 241692_at   | -0.02673799 | -0.57622525 | 0.56667088  | 0.726725443 |
| 241693_at   | -0.00099108 | -0.02568242 | 0.979597958 | 0.989785494 |
| 241694_at   | 0.026545508 | 0.641716115 | 0.523561264 | 0.692217161 |
| 241695_s_at | 0.027893794 | 0.95820025  | 0.3419008   | 0.524897569 |

|             |             |             |             |             |
|-------------|-------------|-------------|-------------|-------------|
| 241696_at   | 0.027310475 | 1.078135149 | 0.285394068 | 0.463188862 |
| 241697_at   | 0.009686074 | 0.250119051 | 0.803370581 | 0.88937622  |
| 241698_at   | 0.420688615 | 4.324338776 | 6.03E-05    | 0.000480998 |
| 241699_at   | -0.37374033 | -5.30632697 | 1.80E-06    | 2.60E-05    |
| 241700_at   | 0.01738448  | 0.432810017 | 0.66674251  | 0.799389856 |
| 241701_at   | 0.217410612 | 2.853477346 | 0.005968581 | 0.022806756 |
| 241702_at   | 0.095002188 | 2.844510324 | 0.006117837 | 0.023283521 |
| 241703_at   | -0.75879336 | -5.78359645 | 3.01E-07    | 6.00E-06    |
| 241704_x_at | 0.082362449 | 2.577975933 | 0.01247452  | 0.041773657 |
| 241705_at   | -0.0452197  | -1.22375319 | 0.225945934 | 0.393427657 |
| 241706_at   | 0.119295678 | 2.43986306  | 0.017740002 | 0.055869532 |
| 241707_at   | -0.06754807 | -1.92740935 | 0.058783302 | 0.144570953 |
| 241708_at   | 0.038479552 | 1.478062753 | 0.144749119 | 0.286777535 |
| 241709_s_at | 0.001233099 | 0.040179048 | 0.968087039 | 0.98380431  |
| 241710_at   | 0.062052536 | 1.649917904 | 0.10431348  | 0.224836173 |
| 241711_at   | -0.06382918 | -1.45075037 | 0.15218455  | 0.297265381 |
| 241712_at   | -0.04727728 | -1.33578557 | 0.186787228 | 0.344686974 |
| 241713_s_at | -0.019577   | -0.39345825 | 0.695409792 | 0.819557365 |
| 241714_at   | -0.04083736 | -1.2583985  | 0.213241264 | 0.378557242 |
| 241715_x_at | 0.085997184 | 2.404899842 | 0.019357032 | 0.060037538 |
| 241716_at   | 0.407298109 | 3.188815306 | 0.002294488 | 0.010227913 |
| 241717_at   | 0.615476407 | 3.768459676 | 0.000383837 | 0.002289395 |
| 241718_x_at | 0.054956256 | 1.702809115 | 0.093906034 | 0.207590071 |
| 241719_at   | -0.0471665  | -1.52749836 | 0.132020237 | 0.268205302 |
| 241720_at   | 0.119875574 | 2.616277203 | 0.011290209 | 0.038479527 |
| 241721_at   | 0.219958051 | 2.27681036  | 0.026467413 | 0.077119134 |
| 241722_x_at | -0.01527986 | -0.33476574 | 0.738997821 | 0.848637921 |
| 241723_at   | -0.01116466 | -0.44461513 | 0.658236683 | 0.793313857 |
| 241724_x_at | 0.211720737 | 5.503996807 | 8.61E-07    | 1.41E-05    |
| 241725_at   | -0.02327111 | -0.65484998 | 0.515128116 | 0.685508151 |
| 241726_at   | -0.03116626 | -0.9289617  | 0.356722006 | 0.539805644 |
| 241727_x_at | 0.237605543 | 5.824600996 | 2.58E-07    | 5.29E-06    |
| 241728_at   | 0.042275363 | 1.196888406 | 0.236172522 | 0.405354366 |
| 241729_at   | -0.85170919 | -7.00752434 | 2.72E-09    | 1.79E-07    |
| 241730_at   | -0.02905358 | -1.35575872 | 0.180380919 | 0.336628697 |
| 241731_x_at | -0.01334558 | -0.36709165 | 0.714873764 | 0.832746136 |
| 241732_at   | 0.064203109 | 2.758899833 | 0.007726577 | 0.028255869 |
| 241733_at   | -0.02595058 | -0.83398579 | 0.40767772  | 0.589926565 |
| 241734_at   | -0.03122005 | -0.72271467 | 0.472731469 | 0.648873305 |
| 241735_at   | 0.059630271 | 1.689128021 | 0.096512623 | 0.21189537  |
| 241736_at   | -0.06890407 | -1.77569236 | 0.080979001 | 0.185405405 |
| 241737_x_at | 0.053400776 | 2.095973937 | 0.040415581 | 0.107765239 |
| 241738_at   | -0.00601064 | -0.197813   | 0.843876368 | 0.914269294 |
| 241739_at   | 0.001523044 | 0.017138396 | 0.986384461 | 0.993419155 |
| 241740_at   | -0.00443357 | -0.12509927 | 0.900873383 | 0.94713441  |
| 241741_at   | 0.065333184 | 1.173674113 | 0.245276511 | 0.41664378  |
| 241742_at   | 0.212980474 | 4.297280395 | 6.61E-05    | 0.000519963 |
| 241743_at   | 0.06922864  | 1.650176116 | 0.104260476 | 0.22475874  |
| 241744_x_at | 0.000586832 | 0.031676222 | 0.974837962 | 0.987265038 |
| 241745_at   | -0.35939952 | -4.04286381 | 0.000156229 | 0.001069902 |
| 241746_at   | 0.018731983 | 0.56938405  | 0.571272988 | 0.729692735 |
| 241747_s_at | -0.00672504 | -0.17479683 | 0.861842161 | 0.924788712 |
| 241748_x_at | 0.074776479 | 1.743528409 | 0.08648884  | 0.194983819 |
| 241749_at   | -0.08078687 | -3.09567159 | 0.003010835 | 0.01288891  |
| 241750_x_at | 0.051780519 | 1.700176146 | 0.094403131 | 0.208379747 |
| 241751_at   | 0.124154985 | 2.72990859  | 0.00835406  | 0.030136383 |
| 241752_at   | -0.27901855 | -4.11454509 | 0.000122925 | 0.000878581 |
| 241753_at   | -0.04893231 | -1.25116706 | 0.215848448 | 0.381847724 |
| 241754_at   | -0.09443729 | -2.73070925 | 0.008336121 | 0.030081381 |
| 241755_at   | 0.110822051 | 2.027853797 | 0.047132467 | 0.121774419 |
| 241756_at   | 0.015775038 | 0.368047822 | 0.714164481 | 0.832300908 |
| 241757_x_at | 0.085446809 | 1.919689766 | 0.059772504 | 0.146600415 |
| 241758_at   | -0.08209917 | -1.22281985 | 0.226295706 | 0.393847411 |
| 241759_at   | -0.06877071 | -2.03458683 | 0.046428182 | 0.120399694 |
| 241760_x_at | -0.03179447 | -1.32576093 | 0.190066888 | 0.348834519 |
| 241761_at   | -0.21872377 | -2.93227124 | 0.004794609 | 0.019060232 |
| 241762_at   | 0.198232323 | 3.011806287 | 0.003829985 | 0.015809703 |
| 241763_s_at | 0.042589374 | 1.195920752 | 0.236547046 | 0.405825741 |
| 241764_at   | -0.05235677 | -1.60713897 | 0.113402441 | 0.239233884 |
| 241765_at   | 0.092155441 | 2.285624423 | 0.025912565 | 0.075856859 |
| 241766_at   | 0.002872793 | 0.097779904 | 0.922440939 | 0.959400152 |
| 241767_at   | 0.023952184 | 0.465833126 | 0.643062778 | 0.783179952 |
| 241768_at   | 0.01556155  | 0.444872745 | 0.658051569 | 0.793140257 |
| 241769_at   | 0.226149846 | 2.958318608 | 0.004456287 | 0.017948844 |
| 241770_x_at | -0.04612579 | -1.74359035 | 0.086477938 | 0.194978501 |

|             |             |             |             |             |
|-------------|-------------|-------------|-------------|-------------|
| 241771_at   | 0.008877545 | 0.233142346 | 0.8164638   | 0.89740538  |
| 241772_at   | -0.67582763 | -5.0878289  | 4.01E-06    | 5.02E-05    |
| 241773_at   | 0.028456474 | 0.731605389 | 0.467326826 | 0.644542974 |
| 241774_at   | -0.15407226 | -3.0930193  | 0.003034014 | 0.012967021 |
| 241775_at   | -0.06164386 | -1.61137665 | 0.112474439 | 0.237838771 |
| 241776_at   | -0.16582264 | -4.16218631 | 0.000104706 | 0.000765757 |
| 241777_x_at | 0.133405376 | 4.002027291 | 0.000178935 | 0.001199482 |
| 241778_at   | -0.06419665 | -1.82257182 | 0.073474356 | 0.171887617 |
| 241779_at   | -0.07438625 | -2.09536651 | 0.040471592 | 0.107882405 |
| 241780_at   | 0.002886404 | 0.083768788 | 0.933525941 | 0.965452861 |
| 241781_at   | -0.10807112 | -4.81535896 | 1.07E-05    | 0.000113209 |
| 241782_at   | 0.500620505 | 5.113225523 | 3.65E-06    | 4.67E-05    |
| 241783_at   | 0.105489105 | 3.902585897 | 0.000248314 | 0.00158475  |
| 241784_x_at | -0.03383141 | -1.29448106 | 0.200580063 | 0.362634473 |
| 241785_at   | 0.021863434 | 0.664471272 | 0.508996592 | 0.680082385 |
| 241786_at   | -0.01574554 | -0.21280963 | 0.832214455 | 0.907280602 |
| 241787_at   | -0.0348324  | -1.17645912 | 0.244171162 | 0.415208035 |
| 241788_x_at | 0.029093823 | 0.819512869 | 0.415816476 | 0.598064878 |
| 241789_at   | 0.150022292 | 4.414359033 | 4.42E-05    | 0.000370969 |
| 241790_at   | -0.01526444 | -0.30889184 | 0.758499981 | 0.86112413  |
| 241791_at   | -0.02690004 | -0.69368262 | 0.490623496 | 0.664815514 |
| 241792_x_at | 0.047983717 | 1.162555776 | 0.249725169 | 0.422156414 |
| 241793_at   | 0.082241044 | 2.557106611 | 0.013166295 | 0.043645458 |
| 241794_at   | 0.02556492  | 0.957016001 | 0.342493141 | 0.525461842 |
| 241795_at   | 0.025510939 | 0.667799954 | 0.506884434 | 0.678314792 |
| 241796_x_at | -0.0096086  | -0.56835221 | 0.571968691 | 0.730334125 |
| 241797_at   | 0.33590929  | 5.844394262 | 2.39E-07    | 4.96E-06    |
| 241798_at   | 0.256210806 | 4.820771538 | 1.05E-05    | 0.000111533 |
| 241799_x_at | 0.063142415 | 1.444014618 | 0.154063362 | 0.299899811 |
| 241800_x_at | -0.00898522 | -0.21581543 | 0.829881498 | 0.905605272 |
| 241801_at   | -0.16280505 | -2.46290546 | 0.016741755 | 0.053258063 |
| 241802_x_at | 0.055365482 | 2.172521038 | 0.033875757 | 0.093814309 |
| 241803_s_at | 0.044791675 | 0.670845232 | 0.504956251 | 0.676767971 |
| 241804_at   | 0.11112037  | 1.525369987 | 0.132549308 | 0.268962256 |
| 241805_at   | 0.778895331 | 5.882616858 | 2.07E-07    | 4.43E-06    |
| 241806_at   | -0.06414361 | -1.6406474  | 0.106231055 | 0.227845157 |
| 241807_x_at | -0.55790185 | -5.46983784 | 9.78E-07    | 1.57E-05    |
| 241808_at   | -0.30631807 | -4.24182457 | 7.99E-05    | 0.000610534 |
| 241809_at   | -0.18511995 | -4.01748481 | 0.000169989 | 0.001148645 |
| 241810_at   | -0.04065504 | -1.06478465 | 0.2913437   | 0.469711955 |
| 241811_x_at | -0.05268463 | -2.76226972 | 0.00765652  | 0.028029586 |
| 241812_at   | 0.075980693 | 1.821902163 | 0.073577303 | 0.172091194 |
| 241813_at   | -0.09834818 | -2.95685139 | 0.004474739 | 0.018011801 |
| 241814_at   | -0.01982601 | -1.02693612 | 0.308673378 | 0.489175228 |
| 241815_at   | 0.048468773 | 1.58642981  | 0.118026843 | 0.246615044 |
| 241816_at   | 0.047437771 | 1.40110663  | 0.16645897  | 0.31765091  |
| 241817_at   | 0.037261242 | 0.971061444 | 0.335511186 | 0.518309378 |
| 241818_at   | 0.085921137 | 2.219377044 | 0.030347489 | 0.085884624 |
| 241819_at   | -0.04464933 | -0.97960511 | 0.331310456 | 0.513861771 |
| 241820_at   | -0.03955545 | -1.03196461 | 0.306331514 | 0.48644713  |
| 241821_at   | -0.10820708 | -3.35897143 | 0.001380569 | 0.006679701 |
| 241822_at   | 0.096440802 | 2.849431089 | 0.006035509 | 0.023013308 |
| 241823_at   | -0.05428485 | -1.50981659 | 0.136466863 | 0.274753449 |
| 241824_at   | 0.179209114 | 2.367072175 | 0.021254207 | 0.064727324 |
| 241825_at   | 0.027810269 | 1.028889151 | 0.307762374 | 0.488164254 |
| 241826_x_at | -0.0058894  | -0.15710254 | 0.875704395 | 0.933249566 |
| 241827_at   | -0.16334158 | -3.82135833 | 0.00032355  | 0.001983825 |
| 241828_x_at | 0.000508895 | 0.015658569 | 0.987560002 | 0.994032378 |
| 241829_at   | 0.019150687 | 0.667593377 | 0.507015376 | 0.678373057 |
| 241830_at   | -0.0282603  | -0.70421134 | 0.484091963 | 0.659053714 |
| 241831_at   | -0.03199131 | -0.94214588 | 0.349988154 | 0.533133812 |
| 241832_at   | 0.064325136 | 1.98002582  | 0.052405557 | 0.13235246  |
| 241833_at   | 0.443793236 | 3.170495514 | 0.002421322 | 0.010693055 |
| 241834_at   | -0.0752729  | -1.11807514 | 0.26810024  | 0.443446926 |
| 241835_at   | -0.0302967  | -0.79467139 | 0.430013257 | 0.610910072 |
| 241836_x_at | -0.03665551 | -1.00700339 | 0.318075644 | 0.499365464 |
| 241837_at   | -0.00703828 | -0.21853791 | 0.827769769 | 0.904419762 |
| 241838_at   | -0.01009441 | -0.23556975 | 0.814588358 | 0.896137425 |
| 241839_at   | -0.05377361 | -1.04658024 | 0.299593455 | 0.478878066 |
| 241840_at   | -0.01892089 | -0.58316743 | 0.562019563 | 0.723149528 |
| 241841_at   | 0.018958889 | 0.52888717  | 0.598882541 | 0.7507997   |
| 241842_x_at | -0.02303891 | -0.65240049 | 0.516695407 | 0.686418871 |
| 241843_at   | 0.041408547 | 0.555180666 | 0.580885515 | 0.737086836 |
| 241844_x_at | -0.05521408 | -2.21467513 | 0.030686309 | 0.086651451 |
| 241845_at   | 0.133147348 | 3.39146257  | 0.001250858 | 0.006146946 |

|             |             |             |             |             |
|-------------|-------------|-------------|-------------|-------------|
| 241846_at   | -0.01199728 | -0.38789691 | 0.699498639 | 0.822314719 |
| 241847_at   | 0.010198918 | 0.302239084 | 0.763540579 | 0.863978699 |
| 241848_x_at | 0.093650958 | 3.683449523 | 0.000503843 | 0.002884305 |
| 241849_at   | 0.019920251 | 0.62297508  | 0.535719343 | 0.702039904 |
| 241850_at   | 0.002089214 | 0.085882392 | 0.931852845 | 0.964636173 |
| 241851_x_at | -0.0061946  | -0.14324939 | 0.886584954 | 0.939234631 |
| 241852_at   | 0.052334864 | 1.727506324 | 0.089347324 | 0.199875394 |
| 241853_at   | 0.186196741 | 3.793326766 | 0.000354265 | 0.002138124 |
| 241854_at   | 0.059937327 | 1.876565217 | 0.065562707 | 0.157677905 |
| 241855_s_at | 0.012012084 | 0.356603543 | 0.722670205 | 0.837962193 |
| 241856_at   | -0.03445525 | -1.19505892 | 0.236880973 | 0.406227099 |
| 241857_at   | 0.124374309 | 4.391562444 | 4.78E-05    | 0.0003965   |
| 241858_at   | 0.020600843 | 0.741778884 | 0.461185725 | 0.639447536 |
| 241859_at   | 0.11376661  | 1.509727615 | 0.136489534 | 0.274774336 |
| 241860_at   | 0.010254184 | 0.415931395 | 0.67898039  | 0.8077502   |
| 241861_at   | 0.076849548 | 1.397136632 | 0.167643681 | 0.319257346 |
| 241862_x_at | 0.01026147  | 0.381584547 | 0.704150497 | 0.825548111 |
| 241863_x_at | 0.055116325 | 1.551155376 | 0.12625194  | 0.259542397 |
| 241864_x_at | 0.074640505 | 1.695597475 | 0.095272723 | 0.209801848 |
| 241865_at   | 0.163858552 | 3.310650226 | 0.001597213 | 0.007552921 |
| 241866_at   | -0.04518012 | -1.69151867 | 0.09605291  | 0.211083082 |
| 241867_at   | 0.428967107 | 6.333312102 | 3.69E-08    | 1.17E-06    |
| 241868_at   | -0.01770945 | -0.9435302  | 0.349285937 | 0.532356413 |
| 241869_at   | 0.12892688  | 2.276196804 | 0.026506425 | 0.07721452  |
| 241870_at   | -0.02580671 | -0.93753787 | 0.352332241 | 0.535574725 |
| 241871_at   | -1.14013464 | -8.0253597  | 5.21E-11    | 1.42E-08    |
| 241872_at   | -0.12539198 | -1.84265761 | 0.070442258 | 0.166466022 |
| 241873_at   | 0.114446608 | 1.346175546 | 0.183433485 | 0.340547888 |
| 241874_at   | -0.08722784 | -1.52947003 | 0.131531617 | 0.26748014  |
| 241875_at   | -0.01122873 | -0.45234168 | 0.652693928 | 0.789440721 |
| 241876_at   | -0.00470799 | -0.13866332 | 0.890191901 | 0.941198401 |
| 241877_at   | 0.056513662 | 1.628297192 | 0.108830091 | 0.232064241 |
| 241878_at   | -0.10156724 | -2.71050079 | 0.00879989  | 0.0314326   |
| 241879_at   | 0.51718003  | 5.590859564 | 6.22E-07    | 1.08E-05    |
| 241880_x_at | -0.04032383 | -1.13583167 | 0.260653725 | 0.434966489 |
| 241881_at   | -0.07500366 | -2.21894417 | 0.030378543 | 0.085939857 |
| 241882_at   | 0.057398358 | 1.647626893 | 0.104784726 | 0.225569046 |
| 241883_x_at | -0.23626924 | -3.74673359 | 0.000411597 | 0.002430642 |
| 241884_at   | 0.052494716 | 1.710135984 | 0.092534065 | 0.205206789 |
| 241885_at   | 0.154463955 | 3.320979611 | 0.001548365 | 0.007356174 |
| 241886_x_at | 0.025053108 | 0.878515033 | 0.383254381 | 0.565872944 |
| 241887_at   | -0.17736806 | -4.57112597 | 2.56E-05    | 0.000235082 |
| 241888_at   | -0.20528781 | -3.74003856 | 0.000420532 | 0.002472627 |
| 241889_at   | 0.013522037 | 0.368010016 | 0.71419252  | 0.832300908 |
| 241890_at   | -0.04961161 | -1.35488851 | 0.180656503 | 0.336917894 |
| 241891_at   | 0.175235606 | 2.763232534 | 0.007636611 | 0.027975625 |
| 241892_at   | 0.025339563 | 0.854472254 | 0.396325181 | 0.578939411 |
| 241893_at   | 0.103635609 | 2.636585162 | 0.010704684 | 0.036829387 |
| 241894_at   | 0.049518642 | 1.22377185  | 0.225938945 | 0.393427657 |
| 241895_at   | 0.035679673 | 0.849358564 | 0.399140437 | 0.581480225 |
| 241896_at   | 0.05778406  | 1.241227915 | 0.219470174 | 0.386331129 |
| 241897_at   | 0.267663921 | 4.3452173   | 5.61E-05    | 0.000454176 |
| 241898_at   | -0.03041553 | -0.97036445 | 0.335855426 | 0.518666616 |
| 241899_at   | -0.00191618 | -0.06818903 | 0.945867432 | 0.972096197 |
| 241900_at   | -0.04006518 | -1.30412623 | 0.197292871 | 0.358256664 |
| 241901_at   | -0.05618519 | -1.79376242 | 0.078013875 | 0.180044426 |
| 241902_at   | 0.027643142 | 0.574793155 | 0.567632747 | 0.727228608 |
| 241903_at   | 0.202536887 | 3.852933216 | 0.000292014 | 0.001820179 |
| 241904_at   | 0.071907186 | 1.583205032 | 0.118760414 | 0.247636454 |
| 241905_at   | 0.280510125 | 2.773225288 | 0.007432779 | 0.027353901 |
| 241906_at   | 0.36370687  | 3.944064876 | 0.000216697 | 0.001410516 |
| 241907_at   | -0.04338837 | -1.04636442 | 0.299692209 | 0.478984523 |
| 241908_at   | -0.08833986 | -2.63236206 | 0.010824115 | 0.0371659   |
| 241909_at   | 0.023044538 | 1.048919826 | 0.298524355 | 0.4777104   |
| 241910_x_at | 0.070526523 | 2.149896755 | 0.035704652 | 0.097758518 |
| 241911_at   | -0.01835361 | -0.51945884 | 0.605398532 | 0.755468788 |
| 241912_at   | -0.03942081 | -1.51663338 | 0.134738723 | 0.272279933 |
| 241913_at   | 0.10541203  | 2.914048245 | 0.005045312 | 0.019865043 |
| 241914_s_at | -0.01432086 | -0.3234946  | 0.747473017 | 0.854331341 |
| 241915_at   | -0.02952174 | -0.86253147 | 0.391913348 | 0.574727371 |
| 241916_at   | 0.174948975 | 3.713205545 | 0.000458244 | 0.002661792 |
| 241917_at   | 0.162021933 | 3.913841071 | 0.000239321 | 0.001536966 |
| 241918_at   | 0.039296486 | 1.207766697 | 0.23199173  | 0.400389515 |
| 241919_x_at | 0.031142197 | 1.068378143 | 0.289733913 | 0.467972102 |
| 241920_x_at | 0.000155963 | 0.005040239 | 0.995995617 | 0.99802776  |

|             |             |             |             |             |
|-------------|-------------|-------------|-------------|-------------|
| 241921_x_at | -0.01645034 | -0.40225055 | 0.688964004 | 0.81466767  |
| 241922_at   | -0.20060378 | -4.14818476 | 0.000109771 | 0.000796407 |
| 241923_x_at | -0.05575944 | -1.35326211 | 0.181172419 | 0.337598305 |
| 241924_at   | 0.074482922 | 2.009884253 | 0.049057392 | 0.125607895 |
| 241925_x_at | -0.14738991 | -3.69235582 | 0.000489759 | 0.002815577 |
| 241926_s_at | -0.08724728 | -2.00052499 | 0.050086509 | 0.127606104 |
| 241927_x_at | 0.075068197 | 2.153450661 | 0.035411762 | 0.097147042 |
| 241928_at   | 0.112267436 | 2.484273875 | 0.015861536 | 0.050943858 |
| 241929_at   | -0.00186335 | -0.04010129 | 0.968148763 | 0.983844665 |
| 241930_x_at | 0.001744954 | 0.046926164 | 0.962731727 | 0.980994217 |
| 241931_at   | -0.02624035 | -0.73437783 | 0.465648682 | 0.643275414 |
| 241932_at   | 0.097926436 | 1.958250807 | 0.054969202 | 0.137413781 |
| 241933_at   | -0.01300211 | -0.46039445 | 0.646938015 | 0.785806212 |
| 241934_at   | -0.04266069 | -1.45691462 | 0.15048087  | 0.294943033 |
| 241935_at   | 0.051350536 | 1.184263568 | 0.241092761 | 0.411287796 |
| 241936_x_at | -0.13142898 | -1.58316118 | 0.118770415 | 0.247636454 |
| 241937_s_at | -0.01875637 | -0.31176186 | 0.75632868  | 0.859779462 |
| 241938_at   | 0.594389852 | 7.441533276 | 5.03E-10    | 5.83E-08    |
| 241939_at   | -0.05793297 | -1.43428026 | 0.156810467 | 0.303739149 |
| 241940_at   | 0.047563759 | 0.761587773 | 0.449362052 | 0.628788905 |
| 241941_at   | -0.03515742 | -0.88872862 | 0.377784691 | 0.560314387 |
| 241942_at   | -0.09530708 | -4.0769747  | 0.000139418 | 0.000974184 |
| 241943_at   | 0.007483314 | 0.239309594 | 0.811701041 | 0.894480297 |
| 241944_x_at | -0.05373333 | -1.08877077 | 0.280715009 | 0.45789403  |
| 241945_at   | -0.02648117 | -0.90123103 | 0.37115679  | 0.554440112 |
| 241946_at   | -0.14350761 | -3.82932158 | 0.000315302 | 0.001940704 |
| 241947_at   | 0.065513664 | 2.064239127 | 0.043433624 | 0.114244925 |
| 241948_at   | -0.02202332 | -0.82493566 | 0.412755536 | 0.595063603 |
| 241949_at   | 0.022130935 | 0.695211677 | 0.489671931 | 0.663908562 |
| 241950_at   | 0.1021898   | 2.587582517 | 0.012167316 | 0.040944333 |
| 241951_at   | 0.051380427 | 1.573359722 | 0.121022723 | 0.251184115 |
| 241952_at   | 0.004069072 | 0.084385144 | 0.933038012 | 0.965277734 |
| 241953_at   | -0.01801801 | -0.68661113 | 0.495037452 | 0.668356196 |
| 241954_at   | 0.691043508 | 5.697398607 | 4.17E-07    | 7.81E-06    |
| 241955_at   | 0.006383744 | 0.118803815 | 0.905837349 | 0.950120462 |
| 241956_at   | 0.296198426 | 4.515158849 | 3.11E-05    | 0.000276531 |
| 241957_x_at | -0.27898152 | -4.25379192 | 7.67E-05    | 0.000590481 |
| 241958_at   | -0.01104725 | -0.34701022 | 0.729827483 | 0.842427351 |
| 241959_at   | -0.09355145 | -3.02461182 | 0.003692728 | 0.015326469 |
| 241960_at   | -0.17326347 | -3.6521173  | 0.000556534 | 0.003135338 |
| 241961_at   | -0.03805001 | -1.60822351 | 0.113164352 | 0.238856202 |
| 241962_at   | 0.040165904 | 1.464621508 | 0.148371858 | 0.29201317  |
| 241963_at   | 0.009346966 | 0.298892782 | 0.766079882 | 0.865658064 |
| 241964_at   | -0.05086688 | -1.77796944 | 0.08060026  | 0.184755954 |
| 241965_at   | 0.075656979 | 1.959369912 | 0.054834878 | 0.137174817 |
| 241966_at   | -0.36121573 | -5.03846803 | 4.80E-06    | 5.83E-05    |
| 241967_at   | -0.0459945  | -1.29294637 | 0.201106862 | 0.363248914 |
| 241968_at   | -0.05256924 | -1.64132408 | 0.106090124 | 0.227622651 |
| 241969_at   | 0.066380392 | 2.430751836 | 0.01814926  | 0.056967537 |
| 241970_at   | 0.056467633 | 1.893600022 | 0.063221131 | 0.153225531 |
| 241971_at   | 0.023761843 | 0.812905429 | 0.419564625 | 0.601757163 |
| 241972_at   | -0.06083355 | -2.02166576 | 0.047787853 | 0.12311087  |
| 241973_x_at | -0.00505899 | -0.16279248 | 0.871242242 | 0.930480237 |
| 241974_at   | 0.017539166 | 0.507580871 | 0.613653533 | 0.761862527 |
| 241975_at   | 0.044580784 | 1.510674116 | 0.136248509 | 0.274486944 |
| 241976_at   | 0.047086075 | 1.288030534 | 0.202801252 | 0.36547844  |
| 241977_s_at | -0.0295897  | -0.88023006 | 0.382332472 | 0.565022813 |
| 241978_at   | 0.033132966 | 1.047624063 | 0.299116146 | 0.478388878 |
| 241979_x_at | 0.016660342 | 0.857100555 | 0.39488301  | 0.577528355 |
| 241980_at   | -0.0968205  | -2.94893568 | 0.004575518 | 0.018344777 |
| 241981_at   | -0.05647335 | -1.54796676 | 0.127017481 | 0.260708425 |
| 241982_at   | -0.03616656 | -1.2642219  | 0.211158731 | 0.376040247 |
| 241983_at   | -0.00676631 | -0.20853367 | 0.835535856 | 0.9091561   |
| 241984_at   | -0.01226693 | -0.33284344 | 0.740441004 | 0.849325929 |
| 241985_at   | 0.023318769 | 0.682339429 | 0.49771432  | 0.670783401 |
| 241986_at   | -0.10815077 | -3.4591077  | 0.001016893 | 0.00516913  |
| 241987_x_at | 0.207777348 | 1.970327454 | 0.053534435 | 0.134519339 |
| 241988_x_at | 0.016297472 | 0.49517624  | 0.622328509 | 0.768005113 |
| 241989_at   | -0.01824259 | -0.38833645 | 0.699175143 | 0.822043973 |
| 241990_at   | 0.057713837 | 1.331689176 | 0.188122185 | 0.346332044 |
| 241991_at   | 0.099370228 | 1.561967264 | 0.12368357  | 0.255416411 |
| 241992_at   | -0.02156899 | -0.63706818 | 0.52656298  | 0.694828684 |
| 241993_x_at | 0.172570994 | 3.965127675 | 0.000202163 | 0.001328684 |
| 241994_at   | 0.039435001 | 1.104046591 | 0.27408846  | 0.450301858 |
| 241995_at   | 0.01849192  | 0.523983193 | 0.602267648 | 0.753331814 |

|             |             |             |             |              |
|-------------|-------------|-------------|-------------|--------------|
| 241996_at   | 0.043221375 | 0.932244374 | 0.355037589 | 0.538167818  |
| 241997_at   | 0.034071395 | 1.094230946 | 0.278333717 | 0.455113076  |
| 241998_at   | -1.15784549 | -7.5272484  | 3.60E-10    | 4.75E-08     |
| 241999_at   | 0.025359452 | 0.715219755 | 0.477314896 | 0.652958596  |
| 242000_at   | -0.07548802 | -1.90208024 | 0.062082131 | 0.151104161  |
| 242001_at   | 0.092819494 | 2.786113503 | 0.007177276 | 0.026584354  |
| 242002_at   | 0.203553161 | 1.847264412 | 0.069761869 | 0.16530393   |
| 242003_at   | -0.08793423 | -3.64583915 | 0.000567707 | 0.003189037  |
| 242004_x_at | -0.01792793 | -0.5425883  | 0.58947218  | 0.743909112  |
| 242005_at   | -0.0445313  | -1.06726003 | 0.29023414  | 0.468521829  |
| 242006_at   | 0.175828501 | 2.044336255 | 0.045424493 | 0.118332445  |
| 242007_at   | 0.444915993 | 6.170432391 | 6.90E-08    | 1.89E-06     |
| 242008_at   | 0.41161166  | 4.309362802 | 6.35E-05    | 0.000501967  |
| 242009_at   | -0.02112631 | -1.25155719 | 0.215707194 | 0.381721873  |
| 242010_at   | -0.03475185 | -0.86858355 | 0.388620454 | 0.571417184  |
| 242011_at   | 0.020724982 | 0.584055556 | 0.561425882 | 0.722799029  |
| 242012_at   | -0.00342699 | -0.08196508 | 0.934953965 | 0.966170385  |
| 242013_at   | -0.01003886 | -0.37344828 | 0.710163238 | 0.829689888  |
| 242014_at   | 0.048244645 | 1.210389677 | 0.230991768 | 0.399160348  |
| 242015_x_at | 0.02231206  | 0.533478782 | 0.595721097 | 0.74854747   |
| 242016_at   | 0.048173936 | 1.143480878 | 0.257491538 | 0.431244457  |
| 242017_at   | -0.0091469  | -0.27033944 | 0.787849524 | 0.8788581    |
| 242018_at   | 0.032081109 | 1.035713624 | 0.304593406 | 0.484571231  |
| 242019_at   | -0.14539261 | -4.90754514 | 7.72E-06    | 8.62E-05     |
| 242020_s_at | 0.03812917  | 0.882000408 | 0.381382287 | 0.564152423  |
| 242021_at   | -0.00539579 | -0.12865505 | 0.898071395 | 0.945420644  |
| 242022_at   | 0.091040334 | 2.474777988 | 0.016247411 | 0.051959162  |
| 242023_at   | 0.032506508 | 0.895847445 | 0.374001666 | 0.557090213  |
| 242024_at   | -0.05946966 | -1.29711323 | 0.199678946 | 0.361356148  |
| 242025_at   | 0.438617663 | 7.026669458 | 2.52E-09    | 1.71E-07     |
| 242026_at   | -0.03890469 | -1.13360981 | 0.261577389 | 0.435965566  |
| 242027_at   | 0.043394982 | 1.507643635 | 0.137021406 | 0.275609194  |
| 242028_at   | 0.151673665 | 3.540878623 | 0.000789384 | 0.004184458  |
| 242029_at   | 0.081993285 | 1.907409778 | 0.061375257 | 0.149685292  |
| 242030_at   | 0.069115061 | 2.10246844  | 0.03982093  | 0.106510083  |
| 242031_at   | -0.0890101  | -2.54571888 | 0.013558278 | 0.044712704  |
| 242032_at   | -0.13244157 | -3.81894271 | 0.000326093 | 0.001995583  |
| 242033_at   | -0.09958633 | -1.57473133 | 0.120705489 | 0.250688679  |
| 242034_at   | -0.07781318 | -2.15626471 | 0.03518134  | 0.096639488  |
| 242035_at   | -0.03939842 | -1.00676002 | 0.31819162  | 0.499494903  |
| 242036_x_at | -0.29414289 | -6.08550224 | 9.55E-08    | 2.44E-06     |
| 242037_at   | 0.066159109 | 2.193243888 | 0.032273193 | 0.090322096  |
| 242038_at   | 0.030093266 | 0.806241552 | 0.423365351 | 0.604989425  |
| 242039_at   | 0.039415541 | 0.967311466 | 0.337366029 | 0.52014912   |
| 242040_at   | 0.101875458 | 2.431302918 | 0.018124267 | 0.056902688  |
| 242041_at   | 0.128391269 | 2.069258892 | 0.042943602 | 0.113142455  |
| 242042_s_at | -0.04732698 | -1.36022408 | 0.178971837 | 0.33468385   |
| 242043_s_at | -0.08200659 | -1.89303067 | 0.063298233 | 0.153369642  |
| 242044_at   | -0.03296305 | -1.21945239 | 0.227560959 | 0.395048784  |
| 242045_at   | 0.022266356 | 0.604768246 | 0.547669044 | 0.7111110544 |
| 242046_at   | -0.02919624 | -0.91026017 | 0.366416489 | 0.549588939  |
| 242047_at   | 0.005438757 | 0.246273405 | 0.806331711 | 0.891005006  |
| 242048_at   | -0.0758271  | -2.71184229 | 0.008768386 | 0.031340108  |
| 242049_s_at | -0.02610517 | -0.51294669 | 0.609918059 | 0.759055941  |
| 242050_at   | 0.017140132 | 0.543229375 | 0.589033584 | 0.74354156   |
| 242051_at   | 0.345231863 | 3.706798244 | 0.000467716 | 0.002706962  |
| 242052_at   | 0.534085667 | 6.840553016 | 5.20E-09    | 2.84E-07     |
| 242053_at   | 0.044335811 | 0.91034858  | 0.366370266 | 0.549557026  |
| 242054_s_at | -0.45253679 | -5.3077048  | 1.79E-06    | 2.59E-05     |
| 242055_at   | 0.293807651 | 4.505696396 | 3.22E-05    | 0.000283909  |
| 242056_at   | 0.089464781 | 2.492893024 | 0.015518466 | 0.050021731  |
| 242057_at   | -0.0321285  | -1.11498079 | 0.269413105 | 0.44507487   |
| 242058_at   | 0.157595992 | 2.884748058 | 0.005474017 | 0.021226332  |
| 242059_at   | 0.141768726 | 2.744976212 | 0.008022326 | 0.02916806   |
| 242060_x_at | 0.046399535 | 1.039377949 | 0.302901064 | 0.482594358  |
| 242061_at   | -0.00120247 | -0.03769948 | 0.9700555   | 0.984891851  |
| 242062_at   | -0.01047842 | -0.28956172 | 0.773174199 | 0.870153227  |
| 242063_s_at | -0.49530747 | -5.78030299 | 3.05E-07    | 6.06E-06     |
| 242064_at   | 0.192194272 | 3.809535642 | 0.000336179 | 0.002047775  |
| 242065_x_at | 0.060952852 | 1.88436916  | 0.064481038 | 0.155620831  |
| 242066_at   | 0.057440519 | 1.843833677 | 0.070268034 | 0.166150942  |
| 242067_at   | 0.005258838 | 0.14863734  | 0.882350418 | 0.93705262   |
| 242068_at   | 0.20180142  | 3.803684772 | 0.000342603 | 0.002078995  |
| 242069_at   | 0.031193318 | 0.83597654  | 0.406565904 | 0.588929549  |
| 242070_at   | -0.1551029  | -3.3201799  | 0.001552096 | 0.007371548  |



|             |             |             |             |             |
|-------------|-------------|-------------|-------------|-------------|
| 242071_x_at | -0.08877467 | -1.83119038 | 0.072160164 | 0.169575247 |
| 242072_at   | -0.02133131 | -0.89465462 | 0.374633864 | 0.557788474 |
| 242073_at   | 0.043713267 | 1.440035797 | 0.155181646 | 0.301525069 |
| 242074_at   | 0.154400163 | 4.601962147 | 2.29E-05    | 0.000214262 |
| 242075_at   | 0.043794218 | 1.566834771 | 0.122541028 | 0.253622921 |
| 242076_at   | 0.029891337 | 0.983990154 | 0.329168033 | 0.511568583 |
| 242077_x_at | 0.162889579 | 5.67272301  | 4.57E-07    | 8.42E-06    |
| 242078_at   | -0.13784783 | -2.97697945 | 0.004227695 | 0.017176742 |
| 242079_at   | -0.00777481 | -0.18821259 | 0.851360632 | 0.918442854 |
| 242080_at   | 0.171580029 | 2.31538777  | 0.024114427 | 0.071649627 |
| 242081_at   | 0.091242968 | 2.353329671 | 0.021983544 | 0.066517407 |
| 242082_at   | 0.159256506 | 3.269926238 | 0.001804336 | 0.008364796 |
| 242083_at   | -0.07480851 | -1.88058183 | 0.065004081 | 0.156595643 |
| 242084_at   | 0.011208665 | 0.457931078 | 0.648696489 | 0.786878181 |
| 242085_at   | 0.052849702 | 1.688859785 | 0.096564316 | 0.211946392 |
| 242086_at   | 0.285312799 | 4.241582523 | 8.00E-05    | 0.000610706 |
| 242087_x_at | 0.093880294 | 1.666509538 | 0.100952005 | 0.21917644  |
| 242088_at   | -0.00128554 | -0.03369115 | 0.973237996 | 0.986490868 |
| 242089_at   | -0.0113265  | -0.39535609 | 0.69401652  | 0.818606131 |
| 242090_x_at | -0.04962477 | -1.57342005 | 0.121008757 | 0.251166791 |
| 242091_at   | -0.07952818 | -3.12110398 | 0.002796834 | 0.012114989 |
| 242092_at   | 0.02842743  | 0.8509957   | 0.398237798 | 0.580591867 |
| 242093_at   | -1.11050822 | -6.40235523 | 2.83E-08    | 9.50E-07    |
| 242094_at   | -0.00559647 | -0.17497134 | 0.861705658 | 0.924708845 |
| 242095_at   | 0.01486109  | 0.450096994 | 0.654302179 | 0.790539956 |
| 242096_at   | -0.04935237 | -1.46188981 | 0.149116729 | 0.292971438 |
| 242097_at   | -0.12244177 | -2.95464069 | 0.004502675 | 0.018109569 |
| 242098_at   | -0.26030077 | -2.61750571 | 0.011253976 | 0.038382379 |
| 242099_at   | 0.311311877 | 5.275212937 | 2.01E-06    | 2.85E-05    |
| 242100_at   | -0.21257166 | -4.48545989 | 3.45E-05    | 0.000302297 |
| 242101_at   | 0.02224141  | 1.284427    | 0.204050077 | 0.367051963 |
| 242102_at   | -0.00195255 | -0.058126   | 0.953846138 | 0.976258224 |
| 242103_at   | -0.0400471  | -0.97190348 | 0.335095617 | 0.517863595 |
| 242104_at   | -0.01165044 | -0.33912727 | 0.735726865 | 0.84636049  |
| 242105_at   | 0.053659899 | 1.771669326 | 0.081651763 | 0.186553889 |
| 242106_at   | -0.04997902 | -1.25316357 | 0.215126297 | 0.380950331 |
| 242107_x_at | -0.00467063 | -0.26727632 | 0.790195381 | 0.880523835 |
| 242108_at   | 0.26880052  | 5.844871024 | 2.39E-07    | 4.95E-06    |
| 242109_at   | -0.02192187 | -0.73234084 | 0.466881328 | 0.644258521 |
| 242110_at   | 0.50188805  | 4.983234734 | 5.87E-06    | 6.85E-05    |
| 242111_at   | 0.119178607 | 3.116116506 | 0.002837644 | 0.012262618 |
| 242112_at   | 0.072044197 | 2.26666663  | 0.027118972 | 0.078538174 |
| 242113_at   | 0.023893279 | 0.711035669 | 0.479884437 | 0.655310293 |
| 242114_at   | 0.011105846 | 0.308676437 | 0.75866302  | 0.86112413  |
| 242115_at   | -0.0226092  | -0.88760348 | 0.378384806 | 0.560943834 |
| 242116_x_at | 0.043049662 | 0.967131484 | 0.337455222 | 0.520244263 |
| 242117_at   | -0.04309531 | -1.3118246  | 0.19469833  | 0.354842907 |
| 242118_x_at | -0.00062765 | -0.03534179 | 0.97192738  | 0.985799115 |
| 242119_at   | 0.120834869 | 3.882157354 | 0.000265473 | 0.00167507  |
| 242120_at   | -0.03933555 | -0.83225801 | 0.408644179 | 0.590829338 |
| 242121_at   | 0.074073215 | 1.210399607 | 0.230987988 | 0.399160348 |
| 242122_at   | -0.02805794 | -0.67893282 | 0.499854728 | 0.672552611 |
| 242123_at   | 0.133928878 | 4.334293115 | 5.83E-05    | 0.000467918 |
| 242124_at   | -0.01681049 | -0.49559507 | 0.622034717 | 0.767743042 |
| 242125_at   | 0.196586514 | 4.988024119 | 5.77E-06    | 6.76E-05    |
| 242126_at   | 0.028173672 | 0.87177568  | 0.386890621 | 0.569569091 |
| 242127_at   | -0.0075903  | -0.36160511 | 0.718948495 | 0.835554444 |
| 242128_at   | 0.062478308 | 2.114205539 | 0.038765553 | 0.104242485 |
| 242129_at   | -0.00974566 | -0.26533945 | 0.791679716 | 0.881348857 |
| 242130_at   | -0.01543402 | -0.65996232 | 0.5118652   | 0.682649862 |
| 242131_at   | 0.067512547 | 1.392355427 | 0.169079079 | 0.321194364 |
| 242132_x_at | 0.028460383 | 0.758719357 | 0.451063179 | 0.630399511 |
| 242133_s_at | -0.07759337 | -1.46657326 | 0.147841446 | 0.291225754 |
| 242134_at   | -0.04775763 | -0.71051586 | 0.480204201 | 0.655546648 |
| 242135_at   | -0.01781888 | -0.64744454 | 0.519874178 | 0.689097054 |
| 242136_x_at | 0.204124905 | 4.255155669 | 7.64E-05    | 0.00058835  |
| 242137_at   | -0.04016018 | -1.38823929 | 0.170322371 | 0.322886422 |
| 242138_at   | 0.071930004 | 0.979289051 | 0.331465231 | 0.514045785 |
| 242139_s_at | -0.02323708 | -0.43187067 | 0.667421237 | 0.799734016 |
| 242140_at   | -0.07860746 | -1.19145797 | 0.23827991  | 0.407828038 |
| 242141_at   | -0.08098768 | -2.39555663 | 0.019810953 | 0.061124688 |
| 242142_at   | -0.11103325 | -2.0002673  | 0.050115105 | 0.127671678 |
| 242143_at   | 0.113979319 | 2.57160028  | 0.012682275 | 0.042348791 |
| 242144_at   | 0.194060352 | 5.187379861 | 2.78E-06    | 3.71E-05    |
| 242145_at   | -0.02837545 | -0.88386795 | 0.38038155  | 0.563138076 |

|             |             |             |             |             |
|-------------|-------------|-------------|-------------|-------------|
| 242146_at   | 0.115118452 | 1.939742359 | 0.057231867 | 0.141793147 |
| 242147_at   | -0.03098263 | -0.86571287 | 0.390180215 | 0.573107246 |
| 242148_at   | 0.020482094 | 0.784157021 | 0.43610813  | 0.616633275 |
| 242149_at   | -0.06200038 | -2.31644704 | 0.024052528 | 0.071510843 |
| 242150_at   | 0.015077245 | 0.401459964 | 0.68954266  | 0.815110813 |
| 242151_at   | 0.044617975 | 1.655123871 | 0.103249065 | 0.222961307 |
| 242152_at   | -0.00951154 | -0.33221211 | 0.740915184 | 0.849639017 |
| 242153_at   | -0.17736292 | -4.05955291 | 0.000147773 | 0.001021702 |
| 242154_x_at | 0.009234487 | 0.331795641 | 0.741228046 | 0.849839054 |
| 242155_x_at | 0.097268941 | 2.674737285 | 0.009678972 | 0.033999264 |
| 242156_at   | 0.107393419 | 2.361632054 | 0.021540298 | 0.065417166 |
| 242157_at   | -0.05927757 | -1.70214743 | 0.094030755 | 0.207771465 |
| 242158_at   | -0.03585922 | -0.90384869 | 0.369778516 | 0.552972677 |
| 242159_at   | -0.0051331  | -0.11904149 | 0.905649874 | 0.949990709 |
| 242160_at   | -0.00444719 | -0.15571035 | 0.876796792 | 0.933984287 |
| 242161_at   | -0.09946628 | -3.41535382 | 0.001162936 | 0.005776807 |
| 242162_at   | -0.04746369 | -0.36764103 | 0.714466208 | 0.832482292 |
| 242163_at   | 0.012839396 | 0.467287904 | 0.642027883 | 0.782495459 |
| 242164_s_at | -0.01511361 | -0.75522406 | 0.453141121 | 0.632413671 |
| 242165_at   | -0.00510006 | -0.20923458 | 0.834991205 | 0.908960441 |
| 242166_at   | 2.61E-05    | 0.000846835 | 0.999327201 | 0.999640344 |
| 242167_at   | 0.141067886 | 4.247295115 | 7.85E-05    | 0.000601319 |
| 242168_at   | -0.03515451 | -0.90767619 | 0.367769105 | 0.550958889 |
| 242169_at   | 0.049409227 | 1.57328377  | 0.12104031  | 0.251208949 |
| 242170_at   | -0.01115453 | -0.51308724 | 0.609820357 | 0.758976618 |
| 242171_at   | 0.126629962 | 3.796960121 | 0.000350132 | 0.002116607 |
| 242172_at   | 0.025552699 | 0.624252898 | 0.534885758 | 0.701420566 |
| 242173_at   | -0.01381557 | -0.37330988 | 0.710265681 | 0.829735573 |
| 242174_at   | -0.00708899 | -0.19784259 | 0.843853323 | 0.914266489 |
| 242175_at   | 0.013471777 | 0.40940069  | 0.683739111 | 0.810914077 |
| 242176_at   | -0.02171716 | -0.40164958 | 0.689403857 | 0.81499371  |
| 242177_at   | -0.04008464 | -1.08611035 | 0.281880399 | 0.459120186 |
| 242178_at   | -0.016049   | -0.57644341 | 0.566524427 | 0.726654176 |
| 242179_s_at | -0.03209294 | -0.75376438 | 0.454010536 | 0.633308015 |
| 242180_at   | 0.068784206 | 1.877767579 | 0.06539506  | 0.157379933 |
| 242181_at   | 0.457537986 | 5.109014891 | 3.71E-06    | 4.72E-05    |
| 242182_x_at | 0.128168194 | 3.556909209 | 0.000750872 | 0.004027601 |
| 242183_at   | -0.09887436 | -2.14677707 | 0.0359635   | 0.098346738 |
| 242184_s_at | -0.0080267  | -0.1449644  | 0.885236716 | 0.938530476 |
| 242185_at   | 0.015489537 | 0.428265747 | 0.670028578 | 0.801341858 |
| 242186_x_at | -0.18719252 | -4.34416375 | 5.63E-05    | 0.000455496 |
| 242187_s_at | 0.032203984 | 0.622814834 | 0.535823927 | 0.702115195 |
| 242188_at   | -0.04688121 | -1.07695681 | 0.285915778 | 0.463766122 |
| 242189_at   | -0.31512441 | -3.84872158 | 0.000296043 | 0.001841953 |
| 242190_at   | 0.043253017 | 0.931517016 | 0.355410369 | 0.538495447 |
| 242191_at   | -0.06691325 | -0.89082761 | 0.376666759 | 0.55939889  |
| 242192_at   | 0.050265909 | 1.654045843 | 0.103468749 | 0.223381737 |
| 242193_at   | -0.4950102  | -6.75356241 | 7.28E-09    | 3.58E-07    |
| 242194_at   | 0.091553626 | 2.595027886 | 0.011933972 | 0.040289551 |
| 242195_x_at | 0.130885482 | 2.780445177 | 0.007288636 | 0.026918742 |
| 242196_at   | -0.44210666 | -6.84703804 | 5.07E-09    | 2.80E-07    |
| 242197_x_at | -0.0056737  | -0.13353891 | 0.894225001 | 0.943542916 |
| 242198_at   | -0.05310056 | -2.41601079 | 0.018829379 | 0.058691772 |
| 242199_at   | -0.02816695 | -0.84602904 | 0.400980071 | 0.583238994 |
| 242200_at   | -0.06662447 | -1.85005011 | 0.069353133 | 0.164597219 |
| 242201_at   | -0.02456623 | -0.40788057 | 0.684848637 | 0.811562159 |
| 242202_at   | 0.039205603 | 1.377281193 | 0.173666553 | 0.32742061  |
| 242203_at   | -0.44395399 | -5.92757476 | 1.74E-07    | 3.88E-06    |
| 242204_at   | 0.001310395 | 0.032574275 | 0.974124845 | 0.986888235 |
| 242205_at   | 0.057105988 | 1.697692695 | 0.09487398  | 0.209129861 |
| 242206_at   | -0.01701113 | -0.21812343 | 0.828091188 | 0.904512938 |
| 242207_at   | -0.06416989 | -1.62807814 | 0.108876651 | 0.232130298 |
| 242208_at   | 0.026487484 | 0.361090597 | 0.719331034 | 0.835760795 |
| 242209_at   | -0.01755308 | -0.54234306 | 0.589640001 | 0.743999748 |
| 242210_at   | 0.177392524 | 2.889105817 | 0.00540819  | 0.021012155 |
| 242211_x_at | 0.050609516 | 1.012205903 | 0.315603248 | 0.496881624 |
| 242212_at   | -0.01708072 | -0.44307145 | 0.659346392 | 0.794066434 |
| 242213_at   | -0.11924385 | -3.42519696 | 0.001128444 | 0.00563113  |
| 242214_at   | 0.049404025 | 1.174282792 | 0.245034624 | 0.416327837 |
| 242215_at   | -0.01523339 | -0.52290812 | 0.603010926 | 0.753886644 |
| 242216_at   | 0.060157022 | 1.463310693 | 0.148728923 | 0.292509814 |
| 242217_s_at | -0.0145548  | -0.34619066 | 0.730440066 | 0.842815412 |
| 242218_at   | 0.002489591 | 0.051648656 | 0.958984408 | 0.979028512 |
| 242219_at   | -0.02295219 | -0.70788427 | 0.48182488  | 0.657019121 |
| 242220_at   | -0.11335812 | -3.41015447 | 0.001181556 | 0.005857584 |

|             |             |             |             |             |
|-------------|-------------|-------------|-------------|-------------|
| 242221_at   | -0.00889227 | -0.41063324 | 0.682839997 | 0.81042955  |
| 242222_at   | -0.12639956 | -3.31626188 | 0.001570498 | 0.007445495 |
| 242223_at   | 0.007544319 | 0.216948943 | 0.829002121 | 0.905109757 |
| 242224_at   | -0.01185309 | -0.29501225 | 0.769027813 | 0.867753094 |
| 242225_at   | 0.212999767 | 2.698065189 | 0.00909691  | 0.032325601 |
| 242226_at   | -0.0912151  | -2.66207972 | 0.01000886  | 0.03492746  |
| 242227_at   | -0.074708   | -2.26588162 | 0.027169983 | 0.078634948 |
| 242228_at   | 0.118295582 | 2.41238755  | 0.01900001  | 0.059133098 |
| 242229_at   | -0.00603357 | -0.1334008  | 0.894333739 | 0.943580778 |
| 242230_at   | -0.03809649 | -1.16264101 | 0.249690846 | 0.422130321 |
| 242231_at   | -0.04652469 | -0.99523344 | 0.323717014 | 0.505763132 |
| 242232_at   | 0.10010347  | 1.810983799 | 0.075272937 | 0.175113118 |
| 242233_at   | 0.196904726 | 4.47862561  | 3.53E-05    | 0.000308738 |
| 242234_at   | 0.04286779  | 0.960889964 | 0.340557951 | 0.523445195 |
| 242235_x_at | 0.24441082  | 5.309670199 | 1.77E-06    | 2.57E-05    |
| 242236_at   | -0.00720297 | -0.23065645 | 0.818385553 | 0.898687994 |
| 242237_at   | 0.026765135 | 0.931740356 | 0.355295878 | 0.538412915 |
| 242238_at   | -0.05334601 | -1.29026129 | 0.202031037 | 0.364432156 |
| 242239_at   | 0.567865616 | 7.876968064 | 9.26E-11    | 2.01E-08    |
| 242240_at   | 0.300710617 | 4.807513493 | 1.11E-05    | 0.000115971 |
| 242241_x_at | 0.104356015 | 3.43490258  | 0.001095384 | 0.005492529 |
| 242242_at   | 0.009226391 | 0.251910136 | 0.801992438 | 0.888271568 |
| 242243_at   | 0.163699356 | 2.382298535 | 0.020471431 | 0.062742366 |
| 242244_at   | 0.027968524 | 0.763692319 | 0.44811632  | 0.627656676 |
| 242245_at   | -0.23782313 | -6.47057543 | 2.18E-08    | 7.85E-07    |
| 242246_x_at | -0.12214124 | -2.58502969 | 0.012248273 | 0.041157883 |
| 242247_at   | -0.0641453  | -1.48363061 | 0.143268962 | 0.284623079 |
| 242248_at   | 0.051520629 | 1.087140179 | 0.281428887 | 0.458697133 |
| 242249_at   | -0.02440494 | -0.97891815 | 0.331646922 | 0.514223017 |
| 242250_at   | 0.002780849 | 0.075915133 | 0.939745351 | 0.968462955 |
| 242251_at   | -0.01215972 | -0.27850532 | 0.781605466 | 0.875189077 |
| 242252_at   | -0.03473217 | -1.13194387 | 0.262271463 | 0.436759672 |
| 242253_at   | -0.18627956 | -3.88275984 | 0.000264951 | 0.001672924 |
| 242254_at   | -0.02749755 | -0.80789932 | 0.422417918 | 0.604350521 |
| 242255_at   | 0.340747072 | 5.588578259 | 6.27E-07    | 1.09E-05    |
| 242256_x_at | 0.119639695 | 3.970573557 | 0.00019856  | 0.001309438 |
| 242257_at   | -0.01098666 | -0.357432   | 0.722053271 | 0.837466406 |
| 242258_at   | 0.053628592 | 1.492092933 | 0.141042183 | 0.281479737 |
| 242259_at   | -0.06790224 | -2.3237462  | 0.023629826 | 0.07055951  |
| 242260_at   | 0.036009758 | 0.857498451 | 0.394664965 | 0.577285024 |
| 242261_at   | 0.117495634 | 2.179353362 | 0.033339843 | 0.092627    |
| 242262_x_at | 0.029229585 | 1.186296967 | 0.240295326 | 0.410257894 |
| 242263_at   | 0.21410466  | 2.987535607 | 0.004103263 | 0.016747416 |
| 242264_at   | 0.116554918 | 2.85571729  | 0.005931826 | 0.022687648 |
| 242265_at   | 0.173816415 | 4.113208142 | 0.000123478 | 0.000881619 |
| 242266_x_at | -0.01533197 | -0.45935586 | 0.647679163 | 0.786257698 |
| 242267_x_at | -0.01713153 | -0.44885386 | 0.655193557 | 0.791078594 |
| 242268_at   | -0.15027814 | -1.87127768 | 0.066304277 | 0.159059084 |
| 242269_at   | 0.035927966 | 0.445928754 | 0.657292966 | 0.792610686 |
| 242270_at   | -0.03218682 | -0.92782015 | 0.35730897  | 0.540382812 |
| 242271_at   | 0.125762214 | 2.776570587 | 0.007365668 | 0.027153876 |
| 242272_at   | -0.06561342 | -1.71174086 | 0.092235764 | 0.204778312 |
| 242273_at   | 0.381622132 | 5.799640435 | 2.83E-07    | 5.69E-06    |
| 242274_x_at | 0.012385009 | 0.457580365 | 0.64894701  | 0.787080575 |
| 242275_at   | -0.00513649 | -0.15882391 | 0.874354026 | 0.932393942 |
| 242276_at   | 0.013852284 | 0.571769056 | 0.569666513 | 0.728476406 |
| 242277_at   | 0.056091397 | 0.724751197 | 0.471490362 | 0.647826336 |
| 242278_at   | -0.00095796 | -0.02948216 | 0.976580286 | 0.98827608  |
| 242279_at   | -0.09593651 | -2.46070679 | 0.016834775 | 0.053516942 |
| 242280_x_at | 0.246471319 | 4.916279262 | 7.48E-06    | 8.41E-05    |
| 242281_at   | -0.03622838 | -0.34576354 | 0.730759387 | 0.842987609 |
| 242282_at   | -0.0652763  | -1.87030387 | 0.066441622 | 0.159293355 |
| 242283_at   | -0.01790589 | -0.54163693 | 0.590123344 | 0.744285917 |
| 242284_at   | 0.063837418 | 1.804990163 | 0.076217588 | 0.176731163 |
| 242285_at   | 0.008806613 | 0.293612351 | 0.770092117 | 0.868413325 |
| 242286_at   | -0.70547864 | -5.99549608 | 1.35E-07    | 3.18E-06    |
| 242287_at   | 0.018183085 | 0.45084411  | 0.653766709 | 0.790106591 |
| 242288_s_at | -0.02260066 | -0.49584379 | 0.621860281 | 0.767711163 |
| 242289_at   | -0.16437176 | -2.41971101 | 0.018656543 | 0.058213937 |
| 242290_at   | 0.20578     | 3.993281274 | 0.000184196 | 0.00123032  |
| 242291_at   | -0.06150705 | -1.7908425  | 0.078486774 | 0.180894792 |
| 242292_at   | -0.14208475 | -3.63285179 | 0.000591504 | 0.003301135 |
| 242293_at   | 0.12315133  | 2.683409132 | 0.009458733 | 0.03335959  |
| 242294_at   | -0.0285374  | -0.77628485 | 0.44070466  | 0.621069362 |
| 242295_at   | -9.90E-05   | -0.00359431 | 0.997144377 | 0.998640408 |

|             |             |             |             |             |
|-------------|-------------|-------------|-------------|-------------|
| 242296_x_at | -0.03053056 | -1.56444627 | 0.123100616 | 0.254445137 |
| 242297_at   | 0.07332793  | 1.916692064 | 0.060160435 | 0.147357787 |
| 242298_x_at | 0.002323102 | 0.067712571 | 0.946245085 | 0.972295635 |
| 242299_at   | -0.17370488 | -4.32212253 | 6.07E-05    | 0.000484066 |
| 242300_at   | -0.19618638 | -2.47525093 | 0.016227994 | 0.051923075 |
| 242301_at   | 0.019842356 | 0.348371381 | 0.728810476 | 0.841729451 |
| 242302_at   | -0.0059851  | -0.25828884 | 0.797089531 | 0.884897703 |
| 242303_at   | -0.04772372 | -1.21591267 | 0.228896509 | 0.396520904 |
| 242304_at   | -0.00250866 | -0.08207261 | 0.934868825 | 0.966170385 |
| 242305_at   | -0.12026951 | -3.36784852 | 0.00134392  | 0.0065335   |
| 242306_at   | 0.369729589 | 4.10609564  | 0.000126461 | 0.000899826 |
| 242307_at   | 0.019579499 | 0.607895755 | 0.545606782 | 0.709669916 |
| 242308_at   | -0.08902494 | -2.08735616 | 0.041216559 | 0.109482938 |
| 242309_at   | -0.0197196  | -0.64871259 | 0.519059857 | 0.688432564 |
| 242310_at   | -0.57578718 | -6.19334675 | 6.32E-08    | 1.76E-06    |
| 242311_x_at | 0.213187055 | 5.227338562 | 2.40E-06    | 3.29E-05    |
| 242312_x_at | -0.03436596 | -1.09284414 | 0.278937191 | 0.45583812  |
| 242313_at   | -0.17036819 | -5.27372422 | 2.03E-06    | 2.87E-05    |
| 242314_at   | 0.038287215 | 1.306656916 | 0.196437118 | 0.357218812 |
| 242315_at   | -0.04470238 | -1.01135251 | 0.316007917 | 0.49723366  |
| 242316_at   | -0.09835294 | -2.40950326 | 0.019136831 | 0.059475888 |
| 242317_at   | -0.47660388 | -7.21810205 | 1.20E-09    | 1.07E-07    |
| 242318_at   | -0.07361305 | -2.34432458 | 0.022473489 | 0.067662705 |
| 242319_at   | 0.020437587 | 0.564099765 | 0.574840194 | 0.732480422 |
| 242320_at   | 0.193467404 | 4.87169225  | 8.78E-06    | 9.58E-05    |
| 242321_at   | 0.131163619 | 2.952178552 | 0.004533979 | 0.01821089  |
| 242322_at   | -0.04579411 | -1.6173209  | 0.111183077 | 0.235787894 |
| 242323_at   | 0.011236425 | 0.199867811 | 0.842276333 | 0.913379287 |
| 242324_x_at | -0.03112923 | -0.69646052 | 0.488895511 | 0.663298569 |
| 242325_at   | -0.02879641 | -0.66325438 | 0.509769928 | 0.680688306 |
| 242326_at   | -0.00367004 | -0.09991465 | 0.920753318 | 0.958276449 |
| 242327_x_at | 0.029918951 | 1.021629543 | 0.311157885 | 0.492030861 |
| 242328_at   | -0.17817276 | -4.2211322  | 8.58E-05    | 0.000647414 |
| 242329_at   | 0.025072849 | 0.714684845 | 0.477642965 | 0.653260857 |
| 242330_at   | -0.04660279 | -1.02621358 | 0.30901087  | 0.489571194 |
| 242331_x_at | 0.021740985 | 0.943566882 | 0.349267341 | 0.532346225 |
| 242332_at   | 0.018667801 | 0.651487522 | 0.517280212 | 0.686919841 |
| 242333_at   | -0.03909021 | -1.11280341 | 0.270339627 | 0.445995518 |
| 242334_at   | -0.02027223 | -0.71073882 | 0.480067031 | 0.655419451 |
| 242335_at   | 0.029404736 | 0.700360106 | 0.486475466 | 0.661033581 |
| 242336_at   | -0.13481888 | -3.0332502  | 0.003602743 | 0.014996839 |
| 242337_at   | 0.041449959 | 1.464139822 | 0.14850299  | 0.29219405  |
| 242338_at   | 0.002141373 | 0.057241344 | 0.954547794 | 0.976618516 |
| 242339_at   | -0.06236126 | -1.34655111 | 0.18331312  | 0.340352705 |
| 242340_at   | 0.011473851 | 0.487343914 | 0.627833865 | 0.772383591 |
| 242341_x_at | -0.02147512 | -0.62603376 | 0.533725134 | 0.700489903 |
| 242342_at   | -0.70384204 | -7.58131611 | 2.92E-10    | 4.16E-08    |
| 242343_x_at | 0.447607604 | 7.127286978 | 1.71E-09    | 1.31E-07    |
| 242344_at   | -1.32659694 | -7.17206151 | 1.43E-09    | 1.18E-07    |
| 242345_at   | 0.101552006 | 1.71610608  | 0.091428398 | 0.203370394 |
| 242346_x_at | -0.07738892 | -2.19910133 | 0.031832467 | 0.089306756 |
| 242347_at   | 0.047738881 | 1.755810166 | 0.084349314 | 0.191250547 |
| 242348_at   | 0.03998049  | 1.274840738 | 0.20740018  | 0.371151151 |
| 242349_at   | 0.106934779 | 3.091001391 | 0.00305176  | 0.013034143 |
| 242350_s_at | 0.006349289 | 0.149379126 | 0.881767696 | 0.936764947 |
| 242351_at   | -0.00937422 | -0.25127851 | 0.80247837  | 0.888655615 |
| 242352_at   | 0.13748134  | 2.062487165 | 0.043605785 | 0.114562914 |
| 242353_at   | -0.091029   | -2.23812107 | 0.029029342 | 0.08294734  |
| 242354_at   | 0.017439656 | 0.491303464 | 0.625048008 | 0.770228455 |
| 242355_at   | -0.01192984 | -0.29456751 | 0.769365884 | 0.867922864 |
| 242356_at   | -0.04688794 | -1.55697451 | 0.124864355 | 0.257305319 |
| 242357_x_at | 0.095984914 | 2.552008694 | 0.013340485 | 0.044144302 |
| 242358_at   | 0.355231421 | 4.85323996  | 9.38E-06    | 0.000101351 |
| 242359_at   | -0.02291179 | -0.55814663 | 0.578871815 | 0.735659544 |
| 242360_at   | 0.027947827 | 0.749404994 | 0.456612811 | 0.635479812 |
| 242361_at   | 0.015170265 | 0.427320947 | 0.670712602 | 0.801759378 |
| 242362_at   | 0.115709649 | 2.718922399 | 0.008603819 | 0.030883936 |
| 242363_at   | -0.0359424  | -0.43384587 | 0.665994378 | 0.79885671  |
| 242364_x_at | 0.225203762 | 5.783063465 | 3.01E-07    | 6.01E-06    |
| 242365_at   | 0.03964067  | 1.056577873 | 0.295043207 | 0.473935422 |
| 242366_at   | -0.00661296 | -0.17024248 | 0.865406184 | 0.927254997 |
| 242367_at   | 0.016584589 | 0.503958914 | 0.616180835 | 0.763956886 |
| 242368_at   | 0.070080133 | 2.110990576 | 0.039052185 | 0.104799984 |
| 242369_x_at | 0.329454298 | 5.711976467 | 3.94E-07    | 7.48E-06    |
| 242370_at   | -0.03882304 | -1.47262216 | 0.146207028 | 0.288859224 |

|             |             |             |             |             |
|-------------|-------------|-------------|-------------|-------------|
| 242371_x_at | -0.0096835  | -0.33686019 | 0.737426463 | 0.847486718 |
| 242372_s_at | -0.24756024 | -4.39701286 | 4.69E-05    | 0.000390072 |
| 242373_at   | -0.01207158 | -0.36975528 | 0.712898532 | 0.831353171 |
| 242374_at   | 0.144739244 | 3.031957772 | 0.003616075 | 0.015044442 |
| 242375_x_at | -0.01875338 | -0.74346975 | 0.460169557 | 0.638672645 |
| 242376_at   | -0.01125226 | -0.35632148 | 0.722880289 | 0.838099194 |
| 242377_x_at | 0.147761276 | 4.466036903 | 3.69E-05    | 0.000320197 |
| 242378_at   | -0.0285115  | -0.80750112 | 0.422645381 | 0.604540482 |
| 242379_at   | -0.10151599 | -2.22154835 | 0.030192141 | 0.085526218 |
| 242380_at   | 0.02369073  | 0.625621458 | 0.533993722 | 0.700641401 |
| 242381_x_at | -0.05081721 | -1.81316419 | 0.074931729 | 0.174526597 |
| 242382_at   | -0.11237413 | -3.74231473 | 0.000417474 | 0.002458849 |
| 242383_at   | 0.073041541 | 2.021377595 | 0.047818564 | 0.123140723 |
| 242384_at   | 0.034661791 | 0.677638831 | 0.500669066 | 0.67322267  |
| 242385_at   | 0.245544203 | 3.500051782 | 0.000896139 | 0.004653757 |
| 242386_x_at | -0.02434027 | -0.86255093 | 0.391902735 | 0.574727371 |
| 242387_at   | -0.06830088 | -1.63331167 | 0.107768664 | 0.23041655  |
| 242388_x_at | -0.00497173 | -0.19976687 | 0.84235492  | 0.913388633 |
| 242389_at   | -0.06053529 | -1.13217471 | 0.262175214 | 0.436668828 |
| 242390_at   | 0.064701576 | 1.931184068 | 0.0583047   | 0.143694366 |
| 242391_at   | 0.041155607 | 1.197619456 | 0.235889859 | 0.405024764 |
| 242392_at   | -0.04430556 | -1.43874137 | 0.155546815 | 0.302024516 |
| 242393_x_at | 0.003429612 | 0.109134519 | 0.91346887  | 0.954094527 |
| 242394_at   | -0.02699382 | -0.66109782 | 0.511141976 | 0.68190917  |
| 242395_at   | 0.025442885 | 0.503735221 | 0.616337075 | 0.764058898 |
| 242396_at   | 0.06522279  | 1.629907097 | 0.108488398 | 0.231512367 |
| 242397_at   | 0.040518522 | 0.516790994 | 0.607248194 | 0.756934688 |
| 242398_x_at | 0.15858068  | 4.513537103 | 3.13E-05    | 0.000277662 |
| 242399_at   | 0.069970455 | 1.824180996 | 0.073227469 | 0.171452328 |
| 242400_at   | -0.08314101 | -3.00530922 | 0.003901428 | 0.016062886 |
| 242401_x_at | -0.07359859 | -2.18427453 | 0.03295846  | 0.09182019  |
| 242402_x_at | 0.066572028 | 1.371071718 | 0.175583766 | 0.330116094 |
| 242403_at   | 0.346701273 | 4.267808385 | 7.32E-05    | 0.000566922 |
| 242404_at   | -1.02369383 | -7.10630721 | 1.85E-09    | 1.38E-07    |
| 242405_at   | 0.414025632 | 5.913166818 | 1.84E-07    | 4.05E-06    |
| 242406_at   | 0.030259965 | 0.582741104 | 0.562304661 | 0.723285373 |
| 242407_at   | 0.145340551 | 3.810362144 | 0.000335281 | 0.002044136 |
| 242408_at   | -0.01735654 | -0.51084829 | 0.611377651 | 0.760204535 |
| 242409_at   | 0.035234004 | 1.428233096 | 0.158536108 | 0.30627197  |
| 242410_s_at | -1.39266913 | -7.17054202 | 1.44E-09    | 1.18E-07    |
| 242411_at   | 0.015604921 | 0.387098228 | 0.700086585 | 0.822790903 |
| 242412_at   | 0.003911032 | 0.16680127  | 0.868100988 | 0.928517359 |
| 242413_at   | 0.08347921  | 2.009881612 | 0.049057679 | 0.125607895 |
| 242414_at   | 0.0876091   | 2.5901016   | 0.012087906 | 0.040735385 |
| 242415_at   | -0.0112792  | -0.23742304 | 0.813157215 | 0.895091802 |
| 242416_at   | 0.007841818 | 0.217418056 | 0.828638247 | 0.904889325 |
| 242417_at   | 0.083683199 | 2.059357857 | 0.043914765 | 0.115232426 |
| 242418_at   | -0.13240998 | -3.06180901 | 0.003319601 | 0.013994867 |
| 242419_at   | 0.071837222 | 1.627258124 | 0.109051091 | 0.232402429 |
| 242420_at   | -0.22882545 | -4.53678914 | 2.88E-05    | 0.000259728 |
| 242421_at   | 0.005113795 | 0.202036848 | 0.840588079 | 0.912319036 |
| 242422_at   | -0.03794261 | -1.23486281 | 0.221812941 | 0.388785942 |
| 242423_x_at | 0.052050364 | 0.992060814 | 0.325249035 | 0.507402548 |
| 242424_at   | 0.116990343 | 2.409672449 | 0.019128781 | 0.059455003 |
| 242425_at   | 0.001815697 | 0.048393651 | 0.961567175 | 0.98041111  |
| 242426_at   | 0.018913495 | 0.471502983 | 0.639033401 | 0.780575073 |
| 242427_at   | 0.099694671 | 2.813478125 | 0.006661381 | 0.024981995 |
| 242428_at   | 0.228247232 | 3.794713515 | 0.000352682 | 0.002129432 |
| 242429_at   | -0.12078666 | -2.30251226 | 0.024878218 | 0.073433547 |
| 242430_at   | -0.0079475  | -0.16099652 | 0.872650219 | 0.931354832 |
| 242431_at   | 0.14748199  | 2.711593453 | 0.008774222 | 0.031353611 |
| 242432_at   | 0.019949227 | 0.663647135 | 0.509520264 | 0.680456586 |
| 242433_at   | 0.001018046 | 0.026600366 | 0.978868914 | 0.989294894 |
| 242434_at   | -0.05714217 | -1.36677817 | 0.176918866 | 0.331858388 |
| 242435_at   | -0.05136218 | -1.53640756 | 0.129823779 | 0.264971654 |
| 242436_at   | 0.004210982 | 0.109092554 | 0.913502009 | 0.954106842 |
| 242437_at   | -0.03789952 | -0.9339602  | 0.354159215 | 0.537328432 |
| 242438_at   | 0.467674023 | 7.892357983 | 8.72E-11    | 1.95E-08    |
| 242439_s_at | 0.376988804 | 6.52444099  | 1.77E-08    | 6.73E-07    |
| 242440_at   | -0.11057396 | -2.70839768 | 0.00884949  | 0.031576958 |
| 242441_at   | -0.05248619 | -1.37899991 | 0.173138735 | 0.326671055 |
| 242442_x_at | 0.071503439 | 1.595083083 | 0.116076411 | 0.24349622  |
| 242443_at   | 0.010685093 | 0.149908365 | 0.881351982 | 0.936571386 |
| 242444_at   | -0.0073527  | -0.23209655 | 0.817272128 | 0.898006451 |
| 242445_at   | -0.08540478 | -2.0909656  | 0.040879416 | 0.10880727  |

|             |             |             |             |             |
|-------------|-------------|-------------|-------------|-------------|
| 242446_at   | -0.00853391 | -0.24774593 | 0.805197531 | 0.890299061 |
| 242447_at   | -0.09489278 | -1.46175091 | 0.149154683 | 0.292999038 |
| 242448_at   | 0.172510438 | 3.710896602 | 0.000461636 | 0.002678363 |
| 242449_at   | -0.12502306 | -2.84901372 | 0.006042452 | 0.023033886 |
| 242450_at   | -0.01822737 | -0.62055399 | 0.537300578 | 0.703346229 |
| 242451_x_at | 0.035257296 | 1.176702582 | 0.244074705 | 0.415059804 |
| 242452_at   | 0.092325779 | 1.905102936 | 0.061680378 | 0.150290015 |
| 242453_at   | 0.049374137 | 1.290426819 | 0.201973973 | 0.364343927 |
| 242454_at   | -0.03926322 | -1.15783437 | 0.251631683 | 0.424550688 |
| 242455_at   | 0.47453592  | 6.096715534 | 9.14E-08    | 2.35E-06    |
| 242456_at   | 0.150526937 | 3.474926309 | 0.000968515 | 0.004964998 |
| 242457_at   | -0.28921766 | -4.99758351 | 5.57E-06    | 6.58E-05    |
| 242458_at   | -0.05407416 | -2.56360788 | 0.012947148 | 0.043044277 |
| 242459_at   | 0.050159514 | 1.225843989 | 0.225163839 | 0.392442957 |
| 242460_at   | 0.047947512 | 1.696359635 | 0.095127516 | 0.209554365 |
| 242461_at   | 0.012504587 | 0.252005709 | 0.801918917 | 0.888271568 |
| 242462_at   | 0.025227257 | 0.570795101 | 0.570322275 | 0.728835729 |
| 242463_x_at | 0.042658797 | 0.843549869 | 0.402353252 | 0.584617024 |
| 242464_at   | -0.07031628 | -2.03796926 | 0.046077817 | 0.119748201 |
| 242465_at   | -0.03390007 | -0.95596049 | 0.343021656 | 0.525893584 |
| 242466_at   | 0.057515364 | 1.483398673 | 0.143330382 | 0.284715165 |
| 242467_at   | 0.272940701 | 3.537244912 | 0.000798372 | 0.004222084 |
| 242468_at   | -0.02742587 | -1.14141582 | 0.258342532 | 0.432218187 |
| 242469_at   | 0.138805755 | 3.582402249 | 0.000693289 | 0.003767108 |
| 242470_at   | -0.23374581 | -3.49196926 | 0.000918841 | 0.004748478 |
| 242471_at   | 0.320541227 | 3.599522749 | 0.000657007 | 0.003601201 |
| 242472_x_at | 0.070851501 | 2.550620409 | 0.013388281 | 0.044269686 |
| 242473_at   | 0.040828882 | 1.359161606 | 0.179306345 | 0.335071047 |
| 242474_s_at | 0.017575833 | 0.757051422 | 0.452054071 | 0.631389479 |
| 242475_at   | 0.00635899  | 0.161120694 | 0.872552854 | 0.931317639 |
| 242476_at   | -0.20531025 | -2.29707877 | 0.025206936 | 0.074207784 |
| 242477_at   | -0.02014994 | -0.93029291 | 0.35603831  | 0.539128701 |
| 242478_at   | -0.0301877  | -0.77621609 | 0.440744931 | 0.621106529 |
| 242479_s_at | 0.061347631 | 1.808525809 | 0.075659146 | 0.175846823 |
| 242480_at   | 0.260480247 | 6.329818167 | 3.74E-08    | 1.18E-06    |
| 242481_at   | -0.24405088 | -5.73846929 | 3.57E-07    | 6.89E-06    |
| 242482_at   | 0.201124518 | 3.234215643 | 0.002006549 | 0.009132977 |
| 242483_at   | 0.224588576 | 3.577146749 | 0.000704804 | 0.003815154 |
| 242484_at   | -0.03455318 | -0.80809816 | 0.422304369 | 0.604246098 |
| 242485_at   | 0.253155844 | 5.269478718 | 2.06E-06    | 2.91E-05    |
| 242486_at   | -0.04853125 | -1.69441398 | 0.095498561 | 0.210133508 |
| 242487_at   | 0.070943481 | 1.636559287 | 0.107085731 | 0.229227649 |
| 242488_at   | -1.01968829 | -7.63380816 | 2.38E-10    | 3.62E-08    |
| 242489_at   | -0.0473607  | -1.30230087 | 0.197911854 | 0.358957695 |
| 242490_at   | 0.015623666 | 0.278163416 | 0.781866618 | 0.875346697 |
| 242491_at   | 0.007726348 | 0.270662676 | 0.78760209  | 0.878757555 |
| 242492_at   | 0.168996303 | 4.687750526 | 1.69E-05    | 0.000165678 |
| 242493_at   | -0.0218264  | -0.70111556 | 0.486007409 | 0.660749148 |
| 242494_at   | -0.35161965 | -5.18844628 | 2.77E-06    | 3.70E-05    |
| 242495_at   | 0.026420047 | 1.033913513 | 0.305427129 | 0.485424938 |
| 242496_at   | -0.03957549 | -0.99429038 | 0.3241719   | 0.506248451 |
| 242497_at   | -0.00901504 | -0.28719311 | 0.774978157 | 0.871065937 |
| 242498_x_at | 0.101805739 | 2.57256847  | 0.012650525 | 0.042259048 |
| 242499_at   | 0.030226914 | 0.810664193 | 0.420840606 | 0.602790062 |
| 242500_at   | 0.121050851 | 2.870266183 | 0.005698142 | 0.021944107 |
| 242501_at   | 0.005179167 | 0.220155185 | 0.826515912 | 0.903808343 |
| 242502_at   | -0.03448285 | -1.57854592 | 0.119826735 | 0.249218678 |
| 242503_at   | -0.01351108 | -0.28907497 | 0.773544812 | 0.870302912 |
| 242504_at   | -0.03283398 | -0.93541384 | 0.35341616  | 0.536573213 |
| 242505_at   | -0.03644121 | -1.07181126 | 0.288201719 | 0.466336827 |
| 242506_at   | 0.026315638 | 0.972678483 | 0.334713436 | 0.51748756  |
| 242507_at   | 0.014280948 | 0.337883537 | 0.736659112 | 0.84704635  |
| 242508_at   | -0.11002096 | -2.65327983 | 0.010244226 | 0.035548764 |
| 242509_at   | 0.052912733 | 1.413505883 | 0.162800394 | 0.312252603 |
| 242510_at   | 0.029653558 | 0.670633315 | 0.505090302 | 0.676869511 |
| 242511_at   | -0.02066146 | -0.50903618 | 0.612639383 | 0.761107447 |
| 242512_at   | 0.064859677 | 1.530115685 | 0.131371924 | 0.267325685 |
| 242513_x_at | -0.03273772 | -1.90491606 | 0.061705151 | 0.150333985 |
| 242514_at   | 0.026992795 | 1.020077388 | 0.311887146 | 0.492870137 |
| 242515_x_at | -0.07229693 | -1.59459417 | 0.116185915 | 0.243691614 |
| 242516_x_at | -0.01342265 | -0.78531537 | 0.435434173 | 0.616047473 |
| 242517_at   | -0.39217907 | -3.25588132 | 0.001881461 | 0.008669508 |
| 242518_at   | 0.114907523 | 2.874818224 | 0.005626795 | 0.021711323 |
| 242519_at   | -0.06705317 | -1.88617614 | 0.064232746 | 0.155189203 |
| 242520_s_at | 0.113012935 | 2.537212086 | 0.013857962 | 0.045529666 |

|             |              |             |             |             |
|-------------|--------------|-------------|-------------|-------------|
| 242521_at   | 0.087083954  | 1.853588597 | 0.068836854 | 0.163606503 |
| 242522_at   | 0.003756606  | 0.172318525 | 0.863781217 | 0.92611338  |
| 242523_at   | 0.145550007  | 3.255849436 | 0.001881639 | 0.008669508 |
| 242524_at   | -0.18896829  | -2.88153508 | 0.005523026 | 0.021380257 |
| 242525_at   | 0.0511177414 | 1.280713848 | 0.205342885 | 0.368550551 |
| 242526_at   | -0.01149054  | -0.49578798 | 0.62189942  | 0.767711163 |
| 242527_at   | -0.06937997  | -2.46002689 | 0.016863634 | 0.053603806 |
| 242528_at   | -0.06560618  | -1.42174282 | 0.160404568 | 0.308893526 |
| 242529_x_at | -0.01223093  | -0.55825418 | 0.578798855 | 0.735608657 |
| 242530_at   | -0.90109365  | -8.98842287 | 1.27E-12    | 2.64E-09    |
| 242531_at   | -0.02891906  | -0.87923839 | 0.382865374 | 0.565541791 |
| 242532_at   | 0.224652296  | 4.151563106 | 0.000108527 | 0.000789438 |
| 242533_at   | -0.0392576   | -1.47084767 | 0.14668502  | 0.289483658 |
| 242534_at   | 0.022469352  | 0.81176776  | 0.420212032 | 0.602275271 |
| 242535_at   | 0.012343299  | 0.298258833 | 0.766561239 | 0.866026818 |
| 242536_at   | -0.05227452  | -1.95778826 | 0.055024803 | 0.137522005 |
| 242537_at   | 0.019832578  | 0.600521998 | 0.550475309 | 0.713365689 |
| 242538_at   | 0.039308685  | 1.338947739 | 0.185761639 | 0.343460124 |
| 242539_at   | -0.03262247  | -0.3064736  | 0.760331001 | 0.862038943 |
| 242540_at   | -0.07145174  | -2.40048107 | 0.019570535 | 0.060528271 |
| 242541_at   | -0.01837707  | -0.41033683 | 0.683056181 | 0.810521224 |
| 242542_at   | -0.02328698  | -1.00723497 | 0.317965317 | 0.49922733  |
| 242543_at   | 0.036081707  | 1.109266123 | 0.271849591 | 0.447771332 |
| 242544_x_at | -0.03639165  | -1.66369422 | 0.101516073 | 0.220204032 |
| 242545_at   | -0.08392382  | -1.98552664 | 0.051774386 | 0.131062072 |
| 242546_at   | 0.002025667  | 0.061168956 | 0.951432921 | 0.975105834 |
| 242547_at   | -0.01218291  | -0.29304476 | 0.770523771 | 0.868702817 |
| 242548_x_at | -0.00664087  | -0.19512348 | 0.845971627 | 0.915410595 |
| 242549_at   | 0.077522511  | 3.159659816 | 0.002499408 | 0.01099228  |
| 242550_at   | 0.097015265  | 2.124146681 | 0.037890815 | 0.102429338 |
| 242551_at   | -0.0742612   | -1.19545927 | 0.236725812 | 0.406038916 |
| 242552_x_at | -0.02628982  | -0.75919348 | 0.450781738 | 0.630163824 |
| 242553_at   | 0.145360476  | 3.864191701 | 0.0002815   | 0.001764051 |
| 242554_at   | -0.02170777  | -0.66773667 | 0.506924543 | 0.678339761 |
| 242555_at   | -0.19076647  | -3.74763469 | 0.000410409 | 0.002425225 |
| 242556_at   | 0.119368635  | 5.182934845 | 2.83E-06    | 3.76E-05    |
| 242557_at   | 0.070115283  | 1.805827735 | 0.076084986 | 0.176515271 |
| 242558_at   | 0.370462142  | 5.629940219 | 5.37E-07    | 9.59E-06    |
| 242559_at   | -0.04979528  | -1.3036899  | 0.197440698 | 0.358395904 |
| 242560_at   | -0.04530788  | -1.70072427 | 0.094299468 | 0.208237075 |
| 242561_at   | -0.05775112  | -1.75044217 | 0.085278973 | 0.192947292 |
| 242562_at   | 0.060258793  | 2.45869048  | 0.016920489 | 0.053742483 |
| 242563_at   | 0.221845944  | 4.73932808  | 1.41E-05    | 0.000142119 |
| 242564_at   | 0.048734048  | 1.505246235 | 0.137635296 | 0.276570148 |
| 242565_x_at | -0.05386046  | -0.77047435 | 0.444115588 | 0.62432102  |
| 242566_at   | -0.12786179  | -4.03187402 | 0.00016205  | 0.00110351  |
| 242567_at   | 0.053785444  | 1.393779584 | 0.168650538 | 0.320633455 |
| 242568_s_at | 0.041990156  | 1.161458943 | 0.250167148 | 0.422638171 |
| 242569_at   | -0.00542675  | -0.09463591 | 0.924927071 | 0.960651653 |
| 242570_at   | 0.054436562  | 1.048231436 | 0.298838652 | 0.478047713 |
| 242571_at   | -0.48727987  | -5.47477115 | 9.60E-07    | 1.54E-05    |
| 242572_at   | 0.670006131  | 6.857926275 | 4.86E-09    | 2.73E-07    |
| 242573_at   | 0.032791162  | 1.361943972 | 0.178431355 | 0.333966584 |
| 242574_at   | 0.042153487  | 0.942181663 | 0.349969988 | 0.533133812 |
| 242575_at   | 0.002404473  | 0.058274409 | 0.95372843  | 0.976227177 |
| 242576_x_at | 0.035233615  | 0.877911447 | 0.38357917  | 0.566221438 |
| 242577_at   | -0.01328776  | -0.33245152 | 0.740735362 | 0.84949695  |
| 242578_x_at | 0.326866622  | 6.698972729 | 9.00E-09    | 4.15E-07    |
| 242579_at   | 0.724501722  | 7.449921625 | 4.87E-10    | 5.71E-08    |
| 242580_at   | 0.000558193  | 0.020624142 | 0.983615587 | 0.99200796  |
| 242581_at   | -0.05768678  | -1.52058195 | 0.133745675 | 0.270768699 |
| 242582_at   | -0.04769631  | -1.46113476 | 0.14932313  | 0.293264861 |
| 242583_at   | 0.231663459  | 3.599432046 | 0.000657194 | 0.003601633 |
| 242584_at   | -0.0519816   | -1.0192617  | 0.31227085  | 0.493232331 |
| 242585_at   | 0.10343323   | 2.372134701 | 0.020991028 | 0.064049363 |
| 242586_at   | -0.16275275  | -2.38632339 | 0.020268872 | 0.062266734 |
| 242587_at   | -0.10312349  | -2.74859343 | 0.00794451  | 0.028921139 |
| 242588_at   | -0.05327388  | -2.103912   | 0.039689793 | 0.106235624 |
| 242589_x_at | 0.104837227  | 3.131287811 | 0.002715205 | 0.011814618 |
| 242590_at   | 0.075446847  | 1.81474859  | 0.074684601 | 0.174070623 |
| 242591_at   | 0.041395962  | 1.316413135 | 0.193164139 | 0.35299688  |
| 242592_at   | -0.58477239  | -6.58625048 | 1.39E-08    | 5.72E-07    |
| 242593_at   | 0.100119013  | 2.790834648 | 0.007085722 | 0.02631722  |
| 242594_at   | -0.0772165   | -1.54705628 | 0.127236751 | 0.260990677 |
| 242595_at   | 0.009245644  | 0.275869322 | 0.783619531 | 0.876348725 |

|             |             |             |             |             |
|-------------|-------------|-------------|-------------|-------------|
| 242596_at   | 0.03314632  | 0.934432553 | 0.35391765  | 0.53705309  |
| 242597_at   | -0.09096788 | -3.28761231 | 0.001711452 | 0.00800337  |
| 242598_at   | 0.116804372 | 3.091103433 | 0.003050861 | 0.013032791 |
| 242599_at   | 0.053031699 | 1.236342594 | 0.221266654 | 0.388239539 |
| 242600_at   | 0.072673134 | 1.413538925 | 0.162790728 | 0.312252603 |
| 242601_at   | -0.01261163 | -0.48990509 | 0.626031247 | 0.770927158 |
| 242602_x_at | -0.00973106 | -0.3102467  | 0.757474719 | 0.86057707  |
| 242603_x_at | -0.06322234 | -3.33829092 | 0.001469649 | 0.007045863 |
| 242604_at   | -0.01630618 | -0.65456438 | 0.515310725 | 0.685576603 |
| 242605_at   | 0.025397673 | 0.788068211 | 0.433834982 | 0.614595138 |
| 242606_at   | -0.08253977 | -2.26057614 | 0.027516968 | 0.079423167 |
| 242607_at   | -0.13602499 | -2.32346852 | 0.023645785 | 0.070588299 |
| 242608_x_at | 0.260222338 | 6.455452589 | 2.31E-08    | 8.19E-07    |
| 242609_x_at | 0.083857741 | 2.339694648 | 0.022729164 | 0.068294459 |
| 242610_x_at | -0.1885962  | -4.56226042 | 2.64E-05    | 0.000241198 |
| 242611_at   | 0.460226327 | 5.661759879 | 4.76E-07    | 8.71E-06    |
| 242612_at   | 0.124527657 | 3.656488886 | 0.000548879 | 0.003098459 |
| 242613_at   | 0.007066099 | 0.257270344 | 0.797871838 | 0.885507169 |
| 242614_at   | -0.01278869 | -0.4385674  | 0.662588619 | 0.796310822 |
| 242615_at   | 0.068783968 | 1.844474897 | 0.070173195 | 0.165988167 |
| 242616_at   | 0.104924623 | 2.569940119 | 0.012736885 | 0.042489877 |
| 242617_at   | -0.13538796 | -2.31388878 | 0.024202264 | 0.07187027  |
| 242618_at   | -0.19679713 | -4.00512446 | 0.000177107 | 0.001189011 |
| 242619_x_at | -0.08825249 | -2.31146484 | 0.024344902 | 0.072202691 |
| 242620_at   | -0.15769593 | -4.16478466 | 0.000103792 | 0.000760811 |
| 242621_at   | -0.02798416 | -0.94896559 | 0.346537642 | 0.529548521 |
| 242622_x_at | 0.028429783 | 1.134395589 | 0.261250461 | 0.435566873 |
| 242623_x_at | -0.05036816 | -2.13651925 | 0.036826223 | 0.100160513 |
| 242624_at   | 0.011438889 | 0.302709175 | 0.763184064 | 0.863756995 |
| 242625_at   | -0.07581024 | -1.43747488 | 0.155904752 | 0.302482476 |
| 242626_at   | -0.39423814 | -7.92661883 | 7.64E-11    | 1.82E-08    |
| 242627_at   | -0.03615003 | -1.66596155 | 0.101061597 | 0.219339786 |
| 242628_at   | 0.000633065 | 0.021567629 | 0.98286617  | 0.991641329 |
| 242629_at   | -0.06532303 | -1.19921786 | 0.235272687 | 0.404244624 |
| 242630_at   | -0.04831403 | -1.57051952 | 0.121681751 | 0.252200567 |
| 242631_x_at | -0.03500854 | -1.40761828 | 0.164529784 | 0.314851789 |
| 242632_at   | 0.012926788 | 0.338118301 | 0.736483113 | 0.846903468 |
| 242633_x_at | 0.165408529 | 5.812809801 | 2.69E-07    | 5.46E-06    |
| 242634_at   | -0.00778622 | -0.19295231 | 0.84766389  | 0.916282429 |
| 242635_s_at | -0.04561714 | -1.15696833 | 0.251982523 | 0.424853922 |
| 242636_at   | 0.067248135 | 1.914647212 | 0.060426285 | 0.147911685 |
| 242637_at   | 0.009362145 | 0.271449877 | 0.786999592 | 0.87841427  |
| 242638_at   | -0.02734973 | -0.74608301 | 0.458601585 | 0.637228642 |
| 242639_at   | 0.02045636  | 0.679929153 | 0.499228203 | 0.672033339 |
| 242640_at   | -0.03284156 | -1.01032684 | 0.316494739 | 0.497687727 |
| 242641_at   | 0.044113289 | 1.467251847 | 0.147657382 | 0.290978602 |
| 242642_at   | 0.038214932 | 1.723760686 | 0.090026718 | 0.200932586 |
| 242643_x_at | 0.055184699 | 2.480555964 | 0.016011622 | 0.051329991 |
| 242644_at   | 0.121937392 | 3.602555627 | 0.000650771 | 0.003573444 |
| 242645_at   | 0.211751514 | 4.163038811 | 0.000104406 | 0.000764056 |
| 242646_at   | 0.343209937 | 5.967527883 | 1.50E-07    | 3.44E-06    |
| 242647_at   | -0.02417115 | -0.62082878 | 0.537120991 | 0.703237478 |
| 242648_at   | 0.130748444 | 2.266307837 | 0.027142276 | 0.078590386 |
| 242649_x_at | -0.08573807 | -3.19344154 | 0.002263461 | 0.01011485  |
| 242650_at   | 0.229025886 | 4.475310029 | 3.58E-05    | 0.00031167  |
| 242651_at   | -0.32575735 | -4.61036287 | 2.23E-05    | 0.000209148 |
| 242652_at   | -0.21339896 | -2.90014577 | 0.00524469  | 0.020487343 |
| 242653_at   | -0.01161412 | -0.38165936 | 0.704095295 | 0.825536486 |
| 242654_at   | 0.03103586  | 1.115125466 | 0.26935162  | 0.445039099 |
| 242655_at   | 0.109011341 | 2.815961137 | 0.006616303 | 0.0248463   |
| 242656_at   | -0.02220076 | -0.90493772 | 0.36920607  | 0.552449366 |
| 242657_at   | 0.001465108 | 0.052908667 | 0.957984737 | 0.978566783 |
| 242658_at   | -0.00929422 | -0.21967094 | 0.826891296 | 0.903931055 |
| 242659_at   | 0.012984867 | 0.48934359  | 0.626426251 | 0.7712235   |
| 242660_at   | 0.00140552  | 0.035149979 | 0.972079678 | 0.985844263 |
| 242661_x_at | 0.051458595 | 0.750307162 | 0.45607357  | 0.635035056 |
| 242662_at   | 0.256560925 | 2.267113792 | 0.027089953 | 0.078464302 |
| 242663_at   | 0.02941063  | 0.7092242   | 0.480999297 | 0.656271235 |
| 242664_at   | 0.060028331 | 1.514808986 | 0.13519952  | 0.272951933 |
| 242665_at   | 0.468279692 | 4.330134827 | 5.91E-05    | 0.000473292 |
| 242666_at   | -0.01167658 | -0.33482919 | 0.738950199 | 0.848626845 |
| 242667_at   | 0.013157117 | 0.638805254 | 0.525440093 | 0.693818136 |
| 242668_x_at | 0.007571775 | 0.189803051 | 0.850119777 | 0.917783892 |
| 242669_at   | 0.314419065 | 4.564022171 | 2.62E-05    | 0.000239936 |
| 242670_at   | 0.056908752 | 1.08735925  | 0.281332904 | 0.458612858 |



|             |             |             |             |             |
|-------------|-------------|-------------|-------------|-------------|
| 242671_at   | 0.170983032 | 3.33678664  | 0.001476336 | 0.007074887 |
| 242672_at   | 0.016948665 | 0.859245954 | 0.393708228 | 0.576393122 |
| 242673_at   | 0.148509075 | 2.155865264 | 0.035213968 | 0.096705337 |
| 242674_at   | -0.42403817 | -6.81345624 | 5.78E-09    | 3.05E-07    |
| 242675_x_at | 0.255491263 | 5.128410214 | 3.46E-06    | 4.45E-05    |
| 242676_at   | -0.05429412 | -1.59037743 | 0.117133809 | 0.245207935 |
| 242677_at   | 0.021797907 | 0.542641946 | 0.589435469 | 0.743901784 |
| 242678_at   | -0.00107696 | -0.02959137 | 0.976493554 | 0.988235092 |
| 242679_at   | 0.010237443 | 0.24690549  | 0.805844812 | 0.890684217 |
| 242680_at   | -0.01621775 | -0.72114936 | 0.473686655 | 0.649725439 |
| 242681_at   | 0.005226183 | 0.188837683 | 0.8508729   | 0.918154662 |
| 242682_at   | -0.04724792 | -1.042709   | 0.301368215 | 0.480919138 |
| 242683_at   | -0.10207855 | -2.99905222 | 0.003971403 | 0.016302925 |
| 242684_at   | -0.1098289  | -3.507594   | 0.000875436 | 0.004561085 |
| 242685_at   | -0.05262154 | -1.58368903 | 0.118650082 | 0.247489473 |
| 242686_at   | 0.044362925 | 1.142206255 | 0.258016563 | 0.431785975 |
| 242687_at   | -0.00388239 | -0.09791613 | 0.922333235 | 0.95936223  |
| 242688_at   | 0.35548559  | 5.75723741  | 3.32E-07    | 6.51E-06    |
| 242689_at   | -0.0464088  | -1.27796064 | 0.206305406 | 0.369736957 |
| 242690_at   | -0.03612874 | -1.44732805 | 0.153136893 | 0.298668733 |
| 242691_at   | 0.261994286 | 2.453812681 | 0.017129471 | 0.054305904 |
| 242692_at   | -0.00375819 | -0.10916781 | 0.913442577 | 0.954089363 |
| 242693_at   | -0.00372912 | -0.08922959 | 0.929203892 | 0.963079321 |
| 242694_at   | -0.0705169  | -2.11664642 | 0.038549161 | 0.103804249 |
| 242695_at   | 0.391624512 | 5.608297809 | 5.83E-07    | 1.02E-05    |
| 242696_at   | 0.074860979 | 1.576934474 | 0.12019733  | 0.24983067  |
| 242697_at   | -0.06571092 | -1.92547229 | 0.059030201 | 0.145098324 |
| 242698_at   | -0.01826915 | -0.76764064 | 0.44578465  | 0.62587156  |
| 242699_at   | 0.104321752 | 3.022864697 | 0.003711181 | 0.015390192 |
| 242700_at   | 0.192825584 | 3.904329481 | 0.0002469   | 0.001578154 |
| 242701_at   | -0.06945365 | -2.0047289  | 0.049621985 | 0.126726044 |
| 242702_at   | -0.13146974 | -3.49279922 | 0.000916485 | 0.004740943 |
| 242703_at   | -0.0303576  | -1.54102038 | 0.128698032 | 0.263202876 |
| 242704_at   | 0.008162222 | 0.270716976 | 0.787560527 | 0.878733119 |
| 242705_x_at | 0.205150685 | 3.494856586 | 0.000910669 | 0.004715516 |
| 242706_s_at | -0.10546311 | -1.41522025 | 0.16229948  | 0.311549194 |
| 242707_at   | -0.02992231 | -0.86542442 | 0.390337155 | 0.573168227 |
| 242708_at   | 0.379907342 | 3.634557667 | 0.000588325 | 0.003285444 |
| 242709_s_at | 0.012495975 | 0.441431805 | 0.660525932 | 0.794856749 |
| 242710_at   | 0.158840529 | 2.280777764 | 0.026216374 | 0.076569217 |
| 242711_x_at | -0.05831375 | -1.748801   | 0.08556489  | 0.193398631 |
| 242712_x_at | 0.165332978 | 2.528926192 | 0.014155619 | 0.046279657 |
| 242713_at   | 0.019632919 | 0.527490164 | 0.599845962 | 0.751501576 |
| 242714_at   | -0.0408594  | -1.21993834 | 0.227378057 | 0.394889286 |
| 242715_at   | 0.334274868 | 2.660641216 | 0.010046994 | 0.03503318  |
| 242716_at   | -0.04591733 | -1.30511441 | 0.196958384 | 0.357852838 |
| 242717_at   | 0.004641404 | 0.122730629 | 0.902740602 | 0.948313139 |
| 242718_at   | -0.04604704 | -1.48274674 | 0.143503131 | 0.284965872 |
| 242719_at   | 0.003049178 | 0.089636585 | 0.928881851 | 0.96292419  |
| 242720_at   | -0.03869482 | -0.91721964 | 0.362789317 | 0.545973673 |
| 242721_at   | -0.00192791 | -0.07937309 | 0.937006464 | 0.96732401  |
| 242722_at   | -0.31625649 | -6.14914861 | 7.48E-08    | 2.01E-06    |
| 242723_at   | -0.03561829 | -1.00595643 | 0.318574763 | 0.499920763 |
| 242724_x_at | -0.03555477 | -1.27607587 | 0.206966255 | 0.370656617 |
| 242725_at   | 0.134759322 | 2.444612573 | 0.017529969 | 0.05535571  |
| 242726_at   | -0.03287222 | -1.13831928 | 0.259622334 | 0.433677493 |
| 242727_at   | -0.00082832 | -0.04196281 | 0.966671078 | 0.983103056 |
| 242728_at   | 0.06483876  | 2.323917266 | 0.023619999 | 0.07053488  |
| 242729_at   | 0.015131425 | 0.415591458 | 0.67922777  | 0.807943349 |
| 242730_at   | 0.036350597 | 1.185422724 | 0.240637943 | 0.410715713 |
| 242731_x_at | 0.048751303 | 1.216586961 | 0.228641656 | 0.396186914 |
| 242732_at   | 0.030562166 | 0.835700447 | 0.406719989 | 0.589076376 |
| 242733_at   | 0.019452316 | 0.744065214 | 0.459812004 | 0.638334982 |
| 242734_x_at | 0.014743732 | 0.380833704 | 0.704704587 | 0.825959387 |
| 242735_x_at | 0.022662346 | 0.577399934 | 0.565882504 | 0.726277091 |
| 242736_at   | -0.10496641 | -1.27831613 | 0.206180937 | 0.369590824 |
| 242737_at   | 0.197946583 | 4.131159525 | 0.000116248 | 0.000836882 |
| 242738_s_at | 0.240966309 | 5.400612884 | 1.27E-06    | 1.93E-05    |
| 242739_at   | -0.20731529 | -3.2948039  | 0.001674988 | 0.007858343 |
| 242740_at   | -0.02875038 | -0.64858391 | 0.519142463 | 0.688490478 |
| 242741_x_at | -0.015292   | -0.40451518 | 0.687307485 | 0.813483743 |
| 242742_at   | 0.074435163 | 1.87684857  | 0.065523166 | 0.157599771 |
| 242743_at   | -0.0418927  | -1.12676835 | 0.264436054 | 0.439345994 |
| 242744_s_at | 0.020708649 | 0.637721943 | 0.526140223 | 0.69449477  |
| 242745_at   | -0.06450685 | -1.69925757 | 0.094577064 | 0.208684865 |

|             |             |             |             |             |
|-------------|-------------|-------------|-------------|-------------|
| 242746_at   | -0.03207899 | -0.72610348 | 0.470667269 | 0.647212751 |
| 242747_at   | -0.17455626 | -3.18246252 | 0.002337747 | 0.01038994  |
| 242748_at   | 0.019064899 | 0.578538134 | 0.565119129 | 0.725505691 |
| 242749_at   | 0.058738437 | 2.394496841 | 0.019863038 | 0.061247336 |
| 242750_at   | -0.02773634 | -0.69408552 | 0.490372659 | 0.664617961 |
| 242751_at   | 0.373112137 | 3.636240817 | 0.000585204 | 0.003270877 |
| 242752_at   | 0.110613923 | 1.579768069 | 0.119546283 | 0.248766704 |
| 242753_x_at | -0.11551713 | -3.33957776 | 0.001463951 | 0.007023066 |
| 242754_at   | 0.041365951 | 1.47338676  | 0.146001446 | 0.288516829 |
| 242755_at   | 0.042945031 | 1.48870118  | 0.141931392 | 0.282774508 |
| 242756_at   | 0.06425376  | 1.662841528 | 0.101687423 | 0.220503117 |
| 242757_at   | -0.02910514 | -0.81958238 | 0.415777156 | 0.598027569 |
| 242758_x_at | 0.018011026 | 0.77118067  | 0.443700135 | 0.623874357 |
| 242759_at   | 0.006187953 | 0.144001946 | 0.8859933   | 0.93895835  |
| 242760_x_at | -0.04899316 | -1.32242517 | 0.191167807 | 0.350236601 |
| 242761_s_at | 0.147340671 | 3.087841775 | 0.003079743 | 0.013133576 |
| 242762_s_at | -0.45017549 | -5.23636572 | 2.33E-06    | 3.20E-05    |
| 242763_at   | -0.03331026 | -1.09550127 | 0.27778173  | 0.45441512  |
| 242764_at   | -0.03235704 | -0.89267861 | 0.375682644 | 0.558573706 |
| 242765_at   | 0.310037191 | 1.993824004 | 0.050834685 | 0.129158826 |
| 242766_at   | -0.07981652 | -2.61751999 | 0.011253556 | 0.038382379 |
| 242767_at   | -0.00818921 | -0.23176742 | 0.817526563 | 0.898043435 |
| 242768_at   | -0.01313355 | -0.38507728 | 0.70157513  | 0.823776889 |
| 242769_at   | 0.006639827 | 0.069360844 | 0.94493868  | 0.971559871 |
| 242770_at   | 0.012959862 | 0.177955553 | 0.85937198  | 0.923424037 |
| 242771_at   | -0.03550118 | -0.80783703 | 0.422453498 | 0.604365966 |
| 242772_x_at | 0.011950947 | 0.44335103  | 0.659145355 | 0.794066434 |
| 242773_at   | -0.0302095  | -0.88615516 | 0.379158189 | 0.561829441 |
| 242774_at   | 0.106886812 | 2.439562497 | 0.017753369 | 0.055903161 |
| 242775_at   | -0.05515137 | -1.29510142 | 0.200367409 | 0.362308637 |
| 242776_at   | -0.06987781 | -2.63081072 | 0.010868292 | 0.037280352 |
| 242777_at   | -0.07382358 | -2.19240089 | 0.032337062 | 0.090449866 |
| 242778_at   | 0.105450101 | 3.473504525 | 0.000972772 | 0.004980805 |
| 242779_at   | -0.06601468 | -1.30404238 | 0.197321274 | 0.358293682 |
| 242780_at   | 0.111103158 | 2.805911878 | 0.006800495 | 0.025421941 |
| 242781_at   | -0.07259284 | -2.7993885  | 0.006922579 | 0.025809951 |
| 242782_x_at | -0.04199642 | -1.36856043 | 0.176363726 | 0.331053284 |
| 242783_at   | -0.05519349 | -0.74114911 | 0.461564535 | 0.639768904 |
| 242784_at   | 0.117023542 | 2.60904971  | 0.011505534 | 0.039106041 |
| 242785_at   | 0.072707496 | 2.100813484 | 0.039971734 | 0.106785625 |
| 242786_at   | -0.18074353 | -4.79166362 | 1.17E-05    | 0.000121451 |
| 242787_at   | 0.023221242 | 0.608667031 | 0.545098815 | 0.70931886  |
| 242788_at   | 0.023684755 | 0.599204523 | 0.551347478 | 0.714007559 |
| 242789_at   | -0.06824367 | -1.12786041 | 0.263978266 | 0.438805202 |
| 242790_at   | 0.232332381 | 5.396847623 | 1.28E-06    | 1.95E-05    |
| 242791_at   | -0.0043626  | -0.19404631 | 0.846811109 | 0.915775411 |
| 242792_at   | -0.01024508 | -0.3445574  | 0.731661371 | 0.843485697 |
| 242793_at   | 0.011182575 | 0.314539452 | 0.754229184 | 0.858693432 |
| 242794_at   | 0.077975893 | 1.514709933 | 0.135224574 | 0.272990182 |
| 242795_at   | 0.027832542 | 0.861040653 | 0.392727152 | 0.57550534  |
| 242796_x_at | 0.031556008 | 1.583317742 | 0.118734713 | 0.247631331 |
| 242797_x_at | 0.17389908  | 2.410395482 | 0.019094413 | 0.059377088 |
| 242798_at   | 0.001533707 | 0.048780915 | 0.961259869 | 0.980231959 |
| 242799_at   | -0.02602971 | -0.93385086 | 0.354215142 | 0.537368683 |
| 242800_at   | -0.03835786 | -0.90511294 | 0.36911402  | 0.552358275 |
| 242801_at   | 0.339286665 | 5.887258406 | 2.03E-07    | 4.37E-06    |
| 242802_x_at | -0.04919967 | -1.95827558 | 0.054966226 | 0.137413781 |
| 242803_at   | 0.005666485 | 0.141735204 | 0.887775601 | 0.939710747 |
| 242804_at   | 0.085530099 | 1.374787331 | 0.174434611 | 0.328508349 |
| 242805_at   | 0.000968421 | 0.038999455 | 0.969023462 | 0.984367523 |
| 242806_at   | 0.000860357 | 0.021147734 | 0.983199693 | 0.99178785  |
| 242807_at   | -0.02755577 | -0.51510377 | 0.60841931  | 0.757844922 |
| 242808_at   | 0.214162109 | 3.61364024  | 0.000628458 | 0.003471823 |
| 242809_at   | 0.177050922 | 2.182211371 | 0.033117883 | 0.092189624 |
| 242810_x_at | -0.02813168 | -0.67207263 | 0.504180222 | 0.676148619 |
| 242811_x_at | 0.04164362  | 1.727009478 | 0.089437199 | 0.200036398 |
| 242812_at   | 0.031744656 | 0.759223829 | 0.450763729 | 0.630158358 |
| 242813_at   | 0.062050266 | 1.836933181 | 0.071295485 | 0.168001413 |
| 242814_at   | 0.106885763 | 2.131684463 | 0.03723908  | 0.101031321 |
| 242815_x_at | -0.05344996 | -2.08721582 | 0.041229715 | 0.109498362 |
| 242816_at   | 0.005436546 | 0.17454529  | 0.862038931 | 0.924888823 |
| 242817_at   | -0.00268932 | -0.06421737 | 0.949015838 | 0.97385446  |
| 242818_x_at | -0.08578313 | -2.13848103 | 0.036659845 | 0.099829502 |
| 242819_at   | 0.088704843 | 1.451750773 | 0.151907038 | 0.296940414 |
| 242820_at   | -0.03676215 | -1.20088262 | 0.234631143 | 0.403483591 |

|             |             |             |             |             |
|-------------|-------------|-------------|-------------|-------------|
| 242821_at   | -0.08741    | -2.87251924 | 0.005662724 | 0.021826644 |
| 242822_at   | -0.00540302 | -0.17186605 | 0.864135328 | 0.926315266 |
| 242823_at   | -0.00999406 | -0.29375635 | 0.769982618 | 0.868333666 |
| 242824_at   | 0.262184384 | 6.276688956 | 4.59E-08    | 1.37E-06    |
| 242825_at   | -0.29697322 | -5.62090084 | 5.56E-07    | 9.86E-06    |
| 242826_at   | 0.168964637 | 2.918703535 | 0.004980135 | 0.019656646 |
| 242827_x_at | 0.05970462  | 1.851540716 | 0.069135252 | 0.164184742 |
| 242828_at   | 0.686827284 | 6.444313356 | 2.41E-08    | 8.43E-07    |
| 242829_x_at | 0.353612636 | 5.094139189 | 3.92E-06    | 4.94E-05    |
| 242830_at   | -0.02554831 | -0.69053225 | 0.492587242 | 0.666440737 |
| 242831_at   | -0.02148827 | -0.76391041 | 0.447987342 | 0.627558462 |
| 242832_at   | 0.081954004 | 2.734914518 | 0.008242477 | 0.029818097 |
| 242833_at   | -0.05883778 | -1.44257142 | 0.154468257 | 0.300491657 |
| 242834_at   | 0.043583406 | 1.672681069 | 0.099724456 | 0.217154814 |
| 242835_s_at | -0.13021858 | -3.96952397 | 0.00019925  | 0.001313347 |
| 242836_at   | -0.1659498  | -2.23981506 | 0.028912742 | 0.082704062 |
| 242837_at   | 0.139949291 | 2.834761215 | 0.006284018 | 0.023804488 |
| 242838_at   | -0.02384685 | -0.7320572  | 0.467053116 | 0.644364322 |
| 242839_at   | -0.05532347 | -1.80321637 | 0.076499048 | 0.177273858 |
| 242840_at   | 0.038087737 | 1.32308823  | 0.190948591 | 0.349921045 |
| 242841_at   | 0.068269287 | 1.787269396 | 0.079068712 | 0.181954528 |
| 242842_at   | -0.02048195 | -0.60922535 | 0.544731253 | 0.709088317 |
| 242843_at   | 0.02543228  | 0.607925457 | 0.545587216 | 0.70966512  |
| 242844_at   | 0.050990647 | 0.608738827 | 0.545051542 | 0.70931886  |
| 242845_at   | -0.22244707 | -5.29845634 | 1.85E-06    | 2.65E-05    |
| 242846_at   | 0.021925226 | 0.485063444 | 0.629440832 | 0.773572656 |
| 242847_at   | 0.047930259 | 1.485695054 | 0.142723189 | 0.283909055 |
| 242848_x_at | -0.02725297 | -0.73718975 | 0.463950152 | 0.641747453 |
| 242849_at   | 0.244060229 | 5.355268807 | 1.50E-06    | 2.23E-05    |
| 242850_at   | 0.049418841 | 0.750890668 | 0.455724995 | 0.63469185  |
| 242851_at   | -0.02564088 | -0.69881886 | 0.487431151 | 0.661773892 |
| 242852_at   | -0.37445181 | -5.08967369 | 3.98E-06    | 5.00E-05    |
| 242853_at   | 0.05943477  | 1.46704991  | 0.147712138 | 0.291060839 |
| 242854_x_at | 0.06384688  | 2.252042206 | 0.028083326 | 0.080744892 |
| 242855_at   | 0.021019368 | 0.630079425 | 0.531093345 | 0.698250339 |
| 242856_at   | -0.35258114 | -2.96712853 | 0.004346972 | 0.017580128 |
| 242857_at   | -0.00806504 | -0.26887342 | 0.788972014 | 0.879627233 |
| 242858_at   | -0.02478092 | -0.81757511 | 0.416913588 | 0.59921859  |
| 242859_at   | 0.236520478 | 4.436564182 | 4.09E-05    | 0.000348253 |
| 242860_at   | -0.03344606 | -1.03743355 | 0.303798272 | 0.483610057 |
| 242861_at   | 0.078210992 | 2.369527514 | 0.021126199 | 0.064392527 |
| 242862_x_at | 0.064409087 | 1.919573056 | 0.059787568 | 0.146627965 |
| 242863_at   | -0.03407857 | -0.79646136 | 0.428980743 | 0.610029508 |
| 242864_at   | 0.014678239 | 0.39656474  | 0.693129762 | 0.817970355 |
| 242865_at   | -0.27880204 | -3.78634304 | 0.000362342 | 0.002177753 |
| 242866_x_at | -0.01679437 | -0.50176831 | 0.617711646 | 0.765189689 |
| 242867_x_at | -0.07446193 | -2.84675406 | 0.00608017  | 0.023157914 |
| 242868_at   | 0.180748121 | 2.655217222 | 0.010191978 | 0.035419897 |
| 242869_at   | 0.012247566 | 0.325313652 | 0.746103049 | 0.853153594 |
| 242870_at   | -0.07916615 | -1.34244705 | 0.18463169  | 0.341991094 |
| 242871_at   | 0.070097444 | 1.841979902 | 0.07054282  | 0.166597956 |
| 242872_at   | -0.08404916 | -1.10235448 | 0.274817039 | 0.451084389 |
| 242873_at   | 0.000410999 | 0.012750994 | 0.989869792 | 0.99528135  |
| 242874_at   | -0.00086165 | -0.01714092 | 0.986382453 | 0.993419155 |
| 242875_at   | 0.271440164 | 4.799080107 | 1.14E-05    | 0.000118885 |
| 242876_at   | 0.265286607 | 4.803165175 | 1.12E-05    | 0.000117433 |
| 242877_at   | 0.215478336 | 3.533951649 | 0.000806601 | 0.004257544 |
| 242878_at   | 0.085132862 | 2.345830718 | 0.022390872 | 0.067440704 |
| 242879_x_at | 0.118438719 | 3.538926054 | 0.000794202 | 0.004205833 |
| 242880_at   | -0.04716062 | -1.7818384  | 0.07996013  | 0.183627672 |
| 242881_x_at | 0.107184197 | 2.134301582 | 0.037015097 | 0.10057017  |
| 242882_at   | -0.05661515 | -1.21518659 | 0.229171168 | 0.396902574 |
| 242883_at   | 0.264243286 | 4.238034785 | 8.10E-05    | 0.000616754 |
| 242884_at   | -0.03595342 | -0.89784953 | 0.37294208  | 0.556029071 |
| 242885_at   | -0.07511929 | -1.58018136 | 0.119451564 | 0.248627482 |
| 242886_at   | 0.109511775 | 2.583198151 | 0.012306658 | 0.041310338 |
| 242887_at   | -0.01843359 | -0.58300824 | 0.562126013 | 0.723158773 |
| 242888_at   | -0.07474899 | -1.94864726 | 0.056133506 | 0.139644791 |
| 242889_x_at | 0.130451852 | 3.112034731 | 0.002871458 | 0.012371657 |
| 242890_at   | -0.01549204 | -0.45549693 | 0.650436081 | 0.788170092 |
| 242891_at   | 0.054048719 | 1.866644639 | 0.066959868 | 0.160264548 |
| 242892_at   | 0.057711484 | 1.530733121 | 0.131219354 | 0.267076026 |
| 242893_at   | 0.017669754 | 0.413677202 | 0.68062148  | 0.808736371 |
| 242894_at   | 0.223227765 | 3.953850685 | 0.000209823 | 0.001371769 |
| 242895_x_at | -0.0385392  | -1.4315012  | 0.157601686 | 0.304941318 |

|             |             |             |             |             |
|-------------|-------------|-------------|-------------|-------------|
| 242896_at   | -0.02847621 | -0.77905071 | 0.439086446 | 0.619531221 |
| 242897_at   | -0.00357625 | -0.13893592 | 0.889977432 | 0.941127496 |
| 242898_at   | -0.0752141  | -2.64311751 | 0.010522312 | 0.036333396 |
| 242899_at   | -0.17448    | -2.40631791 | 0.01928896  | 0.059869587 |
| 242900_at   | 0.026741347 | 0.588524047 | 0.558443569 | 0.720225088 |
| 242901_at   | 0.102358009 | 2.293044347 | 0.025453501 | 0.074766208 |
| 242902_at   | 0.010686958 | 0.354976349 | 0.723882473 | 0.838606423 |
| 242903_at   | 0.463358134 | 5.681607327 | 4.42E-07    | 8.20E-06    |
| 242904_x_at | 0.110815928 | 2.456214231 | 0.017026292 | 0.054025675 |
| 242905_at   | -0.09327896 | -2.88330293 | 0.00549601  | 0.021294121 |
| 242906_at   | -0.22923417 | -3.06061507 | 0.003331009 | 0.014032374 |
| 242907_at   | 0.516316824 | 2.319311113 | 0.023885872 | 0.071129223 |
| 242908_x_at | -0.04560787 | -1.88756786 | 0.064042067 | 0.154854084 |
| 242909_at   | -0.0275946  | -1.08928295 | 0.280491036 | 0.457674531 |
| 242910_x_at | 0.000407781 | 0.021305622 | 0.983074282 | 0.991739271 |
| 242911_at   | 0.059405049 | 1.669441613 | 0.100367269 | 0.218150666 |
| 242912_at   | 0.118255299 | 2.565369894 | 0.012888326 | 0.042899014 |
| 242913_at   | 0.01084452  | 0.316572186 | 0.752693882 | 0.857688355 |
| 242914_at   | -0.06066645 | -1.39279275 | 0.168947396 | 0.321015137 |
| 242915_at   | -0.10749825 | -1.98711498 | 0.051593357 | 0.130692643 |
| 242916_at   | 0.206106776 | 4.272418005 | 7.20E-05    | 0.00055932  |
| 242917_at   | -0.18539743 | -4.25204135 | 7.72E-05    | 0.000593402 |
| 242918_at   | 0.28908339  | 3.303102387 | 0.001633824 | 0.007704035 |
| 242919_at   | -0.0353956  | -0.97968809 | 0.331269829 | 0.513816589 |
| 242920_at   | 0.371962415 | 4.079199622 | 0.000138385 | 0.000969539 |
| 242921_at   | -0.12611437 | -3.84086282 | 0.000303704 | 0.001882806 |
| 242922_at   | 0.277276522 | 4.260901033 | 7.49E-05    | 0.000578564 |
| 242923_at   | 0.339091661 | 5.708746197 | 3.99E-07    | 7.56E-06    |
| 242924_at   | 0.011582152 | 0.380175106 | 0.705190737 | 0.826246173 |
| 242925_at   | -0.09157    | -2.5136214  | 0.014720672 | 0.047819179 |
| 242926_at   | 0.074583488 | 2.036668579 | 0.046212276 | 0.119992971 |
| 242927_at   | 0.014896286 | 0.526731461 | 0.600369489 | 0.751967748 |
| 242928_at   | -0.03664966 | -1.27983876 | 0.205648451 | 0.368961885 |
| 242929_at   | -0.00484463 | -0.14308659 | 0.886712958 | 0.939238898 |
| 242930_at   | -0.08559205 | -2.2906102  | 0.025603297 | 0.075107487 |
| 242931_at   | 0.174734512 | 2.487228301 | 0.015743178 | 0.050610998 |
| 242932_at   | 0.161812065 | 3.209881453 | 0.002156363 | 0.009710042 |
| 242933_at   | 0.002324011 | 0.065017741 | 0.9483813   | 0.973543303 |
| 242934_at   | -0.05225368 | -1.44017942 | 0.15514117  | 0.301472637 |
| 242935_at   | -0.09398476 | -2.53646248 | 0.013884656 | 0.045587205 |
| 242936_at   | 0.150284071 | 3.040032032 | 0.003533535 | 0.014751042 |
| 242937_at   | -0.03133215 | -0.80657489 | 0.423174744 | 0.604960674 |
| 242938_s_at | -0.08510187 | -2.37796159 | 0.020691721 | 0.063274335 |
| 242939_at   | -0.02987157 | -0.96858945 | 0.336733147 | 0.519495937 |
| 242940_x_at | -0.7641978  | -7.45021987 | 4.86E-10    | 5.71E-08    |
| 242941_x_at | 0.012804749 | 0.210169846 | 0.834264578 | 0.908613441 |
| 242942_at   | 0.007540477 | 0.196461455 | 0.844929144 | 0.914796475 |
| 242943_at   | -0.06021314 | -1.95031914 | 0.055929312 | 0.13928221  |
| 242944_at   | 0.07427007  | 2.92700105  | 0.004865899 | 0.01929265  |
| 242945_at   | 0.006072002 | 0.154959633 | 0.877385958 | 0.934442079 |
| 242946_at   | 0.001568035 | 0.046509152 | 0.96306267  | 0.98113172  |
| 242947_at   | -0.03868625 | -1.11963068 | 0.267441963 | 0.442722018 |
| 242948_x_at | -0.03376402 | -1.40716515 | 0.164663471 | 0.315030276 |
| 242949_x_at | 0.013758184 | 0.360505604 | 0.719766063 | 0.835874257 |
| 242950_x_at | -0.00925876 | -0.35918925 | 0.720745311 | 0.836620161 |
| 242951_at   | 0.0303403   | 1.001657712 | 0.320629603 | 0.502422013 |
| 242952_at   | 0.028550788 | 1.105247367 | 0.273572257 | 0.449718296 |
| 242953_at   | 0.018391597 | 0.559054047 | 0.578256407 | 0.735170124 |
| 242954_at   | -0.03111696 | -0.70262499 | 0.48507296  | 0.659915398 |
| 242955_x_at | -0.00575529 | -0.30050117 | 0.764859054 | 0.864889501 |
| 242956_at   | -0.03785208 | -1.04371119 | 0.300908079 | 0.480378063 |
| 242957_at   | 0.059115569 | 1.260268719 | 0.212570794 | 0.377746912 |
| 242958_x_at | 0.03174887  | 1.372479067 | 0.175147825 | 0.329448931 |
| 242959_at   | 0.024333773 | 0.680769463 | 0.498700123 | 0.671706878 |
| 242960_at   | -0.06367513 | -2.45615642 | 0.017028769 | 0.054028804 |
| 242961_x_at | 0.070101716 | 1.419815956 | 0.160962559 | 0.309661171 |
| 242962_at   | 0.019764152 | 0.799528087 | 0.427215186 | 0.608458522 |
| 242963_at   | -0.02509031 | -0.62182214 | 0.536472038 | 0.702717206 |
| 242964_at   | -0.16421203 | -4.05977787 | 0.000147662 | 0.001021409 |
| 242965_at   | -0.10441888 | -2.79384847 | 0.007027841 | 0.026136997 |
| 242966_x_at | -0.05490095 | -1.80152104 | 0.076768869 | 0.177778865 |
| 242967_at   | -0.09805267 | -1.81839599 | 0.07411829  | 0.173039472 |
| 242968_at   | 0.10025807  | 2.280084024 | 0.026260117 | 0.076671926 |
| 242969_at   | -0.07747723 | -2.20464881 | 0.031419952 | 0.088349094 |
| 242970_at   | 0.14708516  | 4.057473394 | 0.000148802 | 0.00102782  |

|             |             |             |             |             |
|-------------|-------------|-------------|-------------|-------------|
| 242971_at   | 0.001730883 | 0.068304268 | 0.945776095 | 0.972056384 |
| 242972_at   | 0.169324836 | 2.295372245 | 0.025310971 | 0.074425811 |
| 242973_at   | -0.232088   | -4.31932921 | 6.13E-05    | 0.000487795 |
| 242974_at   | -0.00384543 | -0.12132454 | 0.903849297 | 0.948994801 |
| 242975_s_at | 0.031304047 | 1.097469547 | 0.27692798  | 0.453497179 |
| 242976_at   | -0.23183923 | -5.55101599 | 7.22E-07    | 1.22E-05    |
| 242977_at   | 0.000472675 | 0.016249198 | 0.987090816 | 0.99371678  |
| 242978_x_at | -0.0542941  | -1.84599727 | 0.069948461 | 0.165614359 |
| 242979_at   | 0.022475492 | 0.6536153   | 0.515917803 | 0.686048334 |
| 242980_at   | -0.08795066 | -1.33092264 | 0.188372789 | 0.346607793 |
| 242981_at   | -0.05762036 | -2.0878021  | 0.041174775 | 0.109417338 |
| 242982_x_at | 0.08317334  | 2.370653767 | 0.021067712 | 0.064235107 |
| 242983_at   | 0.242142941 | 4.661472218 | 1.86E-05    | 0.000179614 |
| 242984_at   | 0.077130634 | 1.500513655 | 0.138853528 | 0.278304864 |
| 242985_x_at | -0.07001846 | -1.40066019 | 0.166591872 | 0.317811694 |
| 242986_at   | 0.307518376 | 5.022403967 | 5.09E-06    | 6.11E-05    |
| 242987_x_at | 0.184201566 | 3.051096114 | 0.003423284 | 0.014368278 |
| 242988_at   | -0.08433389 | -2.22951645 | 0.029628042 | 0.084266927 |
| 242989_at   | -0.67752234 | -6.84936005 | 5.03E-09    | 2.79E-07    |
| 242990_at   | 0.489954631 | 6.913045501 | 3.92E-09    | 2.33E-07    |
| 242991_at   | 0.028595907 | 0.715855129 | 0.476925375 | 0.652605519 |
| 242992_at   | 0.002692904 | 0.0880041   | 0.930173644 | 0.963615135 |
| 242993_at   | 0.018077159 | 0.69339754  | 0.490801017 | 0.664955256 |
| 242994_at   | -0.00823373 | -0.27836513 | 0.781712542 | 0.875245439 |
| 242995_at   | 0.115062927 | 3.171506138 | 0.002414157 | 0.010669848 |
| 242996_at   | -0.0276476  | -0.88550376 | 0.379506352 | 0.562121694 |
| 242997_at   | -0.03537208 | -1.09819302 | 0.276614631 | 0.453135375 |
| 242998_at   | -0.12473743 | -3.55140624 | 0.000763886 | 0.004080756 |
| 242999_at   | -0.51862457 | -5.40562182 | 1.24E-06    | 1.90E-05    |
| 243_g_at    | 0.499121523 | 6.537057793 | 1.68E-08    | 6.52E-07    |
| 243000_at   | -0.00446418 | -0.1252511  | 0.900753717 | 0.947055429 |
| 243001_at   | 0.019577284 | 0.505837593 | 0.614869359 | 0.763029417 |
| 243002_at   | 0.019637069 | 0.508031182 | 0.613339647 | 0.76163241  |
| 243003_at   | 0.217672621 | 4.595292556 | 2.35E-05    | 0.000218487 |
| 243004_at   | -0.02171059 | -0.63954182 | 0.524964339 | 0.693428662 |
| 243005_at   | 0.014178219 | 0.302663691 | 0.763218557 | 0.863756995 |
| 243006_at   | 0.315046452 | 5.398482392 | 1.28E-06    | 1.94E-05    |
| 243007_at   | 0.039704326 | 1.417286762 | 0.161697257 | 0.310651821 |
| 243008_at   | 0.045840603 | 1.567040193 | 0.122492996 | 0.253552729 |
| 243009_at   | 0.090436063 | 1.855914261 | 0.068499297 | 0.163055691 |
| 243010_at   | 0.497212992 | 5.330670055 | 1.64E-06    | 2.41E-05    |
| 243011_at   | 0.04642745  | 1.243288502 | 0.218715663 | 0.385412839 |
| 243012_at   | -0.05555119 | -1.70664252 | 0.093186149 | 0.20635593  |
| 243013_at   | 0.040236597 | 1.098170725 | 0.276624283 | 0.453135375 |
| 243014_at   | 0.060254201 | 1.628450251 | 0.108797568 | 0.23201703  |
| 243015_at   | -0.02186699 | -0.80839476 | 0.422135018 | 0.604081144 |
| 243016_at   | 0.280923296 | 2.927908099 | 0.00485356  | 0.019253975 |
| 243017_at   | -0.02742689 | -0.72906362 | 0.468868362 | 0.645732483 |
| 243018_at   | -0.01055684 | -0.42768426 | 0.670449531 | 0.80156669  |
| 243019_at   | 0.056435455 | 1.524173784 | 0.132847399 | 0.269432563 |
| 243020_at   | 0.148158319 | 3.641021972 | 0.000576425 | 0.003231914 |
| 243021_at   | 0.057336586 | 1.613405924 | 0.112032231 | 0.237093687 |
| 243022_at   | -0.05589568 | -1.96487999 | 0.054177601 | 0.135860474 |
| 243023_at   | -0.6589501  | -6.52953352 | 1.73E-08    | 6.64E-07    |
| 243024_at   | 0.001513444 | 0.042831941 | 0.965981198 | 0.982693116 |
| 243025_at   | 0.048558151 | 1.735358909 | 0.087936745 | 0.197560398 |
| 243026_x_at | -0.01115432 | -0.21974434 | 0.826834391 | 0.903931055 |
| 243027_at   | -0.11909018 | -2.9577289  | 0.004463695 | 0.017973264 |
| 243028_x_at | -0.02882744 | -1.40564268 | 0.165113257 | 0.315648972 |
| 243029_at   | -0.02404701 | -0.64012789 | 0.524585952 | 0.693099845 |
| 243030_at   | 0.163164401 | 4.454923678 | 3.84E-05    | 0.000331277 |
| 243031_at   | 0.028852699 | 0.353670527 | 0.724855831 | 0.839210366 |
| 243032_at   | -0.03010381 | -0.92654647 | 0.357964608 | 0.540968695 |
| 243033_at   | -0.02669883 | -1.14142747 | 0.258337726 | 0.432218187 |
| 243034_at   | -0.09196459 | -2.64685635 | 0.010419209 | 0.036047012 |
| 243035_at   | -0.02866154 | -0.76450206 | 0.447637553 | 0.627259595 |
| 243036_at   | -0.03072041 | -0.65903144 | 0.512458502 | 0.683257618 |
| 243037_at   | 0.268403004 | 4.143240003 | 0.000111615 | 0.000807953 |
| 243038_at   | 0.026636525 | 0.839132404 | 0.404807187 | 0.587158763 |
| 243039_at   | 0.158367395 | 4.037425962 | 0.000159084 | 0.001086455 |
| 243040_at   | -0.02669049 | -1.00251027 | 0.320221367 | 0.501989253 |
| 243041_s_at | 0.041233916 | 0.992854781 | 0.324865184 | 0.507085597 |
| 243042_at   | -0.32299624 | -2.64852251 | 0.010373561 | 0.03591967  |
| 243043_at   | -0.12956158 | -3.3733963  | 0.001321485 | 0.006444061 |
| 243044_at   | -0.03828581 | -1.07129586 | 0.288431384 | 0.466610274 |

|             |             |             |             |             |
|-------------|-------------|-------------|-------------|-------------|
| 243045_at   | -0.00348167 | -0.09406897 | 0.925375461 | 0.960860757 |
| 243046_at   | 0.365196784 | 4.651896097 | 1.92E-05    | 0.000184807 |
| 243047_at   | 0.016803505 | 0.433043504 | 0.666573847 | 0.799275582 |
| 243048_at   | -0.02653595 | -0.75351047 | 0.45416187  | 0.633372196 |
| 243049_at   | 0.063355242 | 1.733037741 | 0.088351771 | 0.198144187 |
| 243050_at   | 0.299574403 | 6.497923753 | 1.96E-08    | 7.27E-07    |
| 243051_at   | 0.010296911 | 0.396431515 | 0.693227485 | 0.818020878 |
| 243052_at   | 0.001256634 | 0.041059555 | 0.967388075 | 0.98341468  |
| 243053_x_at | -0.03225882 | -1.11435086 | 0.269680923 | 0.445303325 |
| 243054_at   | 0.026375626 | 0.58379888  | 0.561597429 | 0.722874119 |
| 243055_at   | -0.01929933 | -0.47756755 | 0.634735583 | 0.777340041 |
| 243056_at   | -0.012955   | -0.42250568 | 0.674203138 | 0.804171093 |
| 243057_at   | 0.01420581  | 0.349861781 | 0.727697467 | 0.841107308 |
| 243058_at   | -0.03137739 | -1.18124963 | 0.242278245 | 0.412834495 |
| 243059_at   | 0.021232747 | 0.578724919 | 0.564993903 | 0.725386599 |
| 243060_at   | 0.078086152 | 1.842977111 | 0.070394891 | 0.166389278 |
| 243061_at   | -0.2280282  | -5.06994259 | 4.28E-06    | 5.30E-05    |
| 243062_at   | 0.018815582 | 0.50228387  | 0.617351217 | 0.764898688 |
| 243063_at   | -0.01410284 | -0.52276354 | 0.60311092  | 0.753922388 |
| 243064_at   | -0.00773413 | -0.25708711 | 0.798012604 | 0.885613239 |
| 243065_at   | -0.00102029 | -0.03951837 | 0.968611512 | 0.984113524 |
| 243066_at   | 0.29015582  | 3.998508648 | 0.000181034 | 0.001212279 |
| 243067_at   | -0.02437243 | -0.94927343 | 0.346382412 | 0.529429642 |
| 243068_at   | -0.02229408 | -0.83239046 | 0.408570042 | 0.590771362 |
| 243069_at   | 0.019239552 | 0.550292189 | 0.584211804 | 0.739883616 |
| 243070_at   | -0.00951767 | -0.28497172 | 0.776671121 | 0.871981956 |
| 243071_at   | 0.00334454  | 0.088407545 | 0.929854379 | 0.963485391 |
| 243072_at   | 0.032666645 | 0.817483314 | 0.416965602 | 0.599274077 |
| 243073_at   | -0.00205862 | -0.05358964 | 0.957444493 | 0.978260883 |
| 243074_at   | -0.07541586 | -2.19301683 | 0.032290385 | 0.090353235 |
| 243075_at   | -0.04988732 | -1.42573604 | 0.159252965 | 0.307298195 |
| 243076_x_at | 0.055719881 | 1.607115836 | 0.113407524 | 0.239233884 |
| 243077_at   | 0.01245898  | 0.312345357 | 0.755887478 | 0.859599674 |
| 243078_at   | 0.121564076 | 3.897458807 | 0.000252517 | 0.001606249 |
| 243079_x_at | -0.03775841 | -1.13684104 | 0.260234879 | 0.43434355  |
| 243080_at   | 0.031986654 | 0.892809594 | 0.375613065 | 0.558520731 |
| 243081_at   | -0.00443468 | -0.15957562 | 0.873764454 | 0.932143341 |
| 243082_at   | 0.030565958 | 0.891178497 | 0.376480076 | 0.55928891  |
| 243083_at   | 0.00264453  | 0.089507194 | 0.928984232 | 0.962965516 |
| 243084_at   | 0.097986729 | 1.640903156 | 0.106177772 | 0.227766966 |
| 243085_at   | 0.046837077 | 1.519308487 | 0.13406531  | 0.271225275 |
| 243086_at   | -0.01076    | -0.31601495 | 0.753114659 | 0.85794908  |
| 243087_at   | 0.267973623 | 2.744409589 | 0.008034579 | 0.029207857 |
| 243088_at   | 0.051998611 | 1.190483881 | 0.23865936  | 0.408360481 |
| 243089_at   | 0.043650844 | 1.174905944 | 0.244787164 | 0.415954827 |
| 243090_at   | 0.035732691 | 0.937728519 | 0.352235057 | 0.535518825 |
| 243091_at   | 0.125847206 | 3.923586999 | 0.000231788 | 0.001496545 |
| 243092_at   | -0.03751489 | -1.15827019 | 0.251455263 | 0.424413256 |
| 243093_at   | -0.01969147 | -0.44582216 | 0.657369521 | 0.79265277  |
| 243094_at   | -0.01033827 | -0.31233705 | 0.75589376  | 0.859599674 |
| 243095_at   | -0.04139618 | -1.19017286 | 0.238780608 | 0.408497279 |
| 243096_at   | 0.036570544 | 1.089688261 | 0.280313884 | 0.457535814 |
| 243097_x_at | 0.046276809 | 1.138441947 | 0.259571551 | 0.4336575   |
| 243098_at   | -0.06811506 | -1.82443251 | 0.073188943 | 0.171380082 |
| 243099_at   | 0.004557866 | 0.149273174 | 0.881850924 | 0.936789748 |
| 243100_at   | -0.03597276 | -1.15730977 | 0.251844162 | 0.42470075  |
| 243101_x_at | 0.030773776 | 0.781226581 | 0.437815881 | 0.618265526 |
| 243102_at   | 0.040586808 | 1.29981287  | 0.198757883 | 0.360141388 |
| 243103_at   | -0.01442907 | -0.38625373 | 0.700708463 | 0.823175424 |
| 243104_at   | -0.02550802 | -0.59598422 | 0.553482249 | 0.715892358 |
| 243105_at   | -0.00556856 | -0.13277519 | 0.89482632  | 0.943783829 |
| 243106_at   | -0.04367558 | -1.18924518 | 0.239142519 | 0.40888165  |
| 243107_at   | -0.04765381 | -1.17521913 | 0.24466286  | 0.415806927 |
| 243108_at   | 0.004101622 | 0.120890499 | 0.904191571 | 0.949196197 |
| 243109_at   | -0.06830707 | -1.97737967 | 0.052711522 | 0.132892387 |
| 243110_x_at | 0.060262156 | 1.667776572 | 0.100698983 | 0.218722733 |
| 243111_at   | 0.072939199 | 1.970210496 | 0.053548175 | 0.134538735 |
| 243112_at   | 0.060325106 | 1.980821261 | 0.052313881 | 0.132180685 |
| 243113_at   | 0.057095084 | 1.580122876 | 0.119464963 | 0.248643791 |
| 243114_at   | -0.00502633 | -0.11906213 | 0.905633588 | 0.949990709 |
| 243115_at   | 0.025961306 | 0.61613497  | 0.540192876 | 0.705770749 |
| 243116_at   | -0.06234505 | -1.38476511 | 0.171377218 | 0.324280902 |
| 243117_at   | 0.0041422   | 0.076854853 | 0.939000968 | 0.968167263 |
| 243118_at   | 0.003739415 | 0.131449825 | 0.895870003 | 0.94414182  |
| 243119_at   | -0.06807396 | -1.19267904 | 0.237804867 | 0.407259711 |

|             |             |             |             |             |
|-------------|-------------|-------------|-------------|-------------|
| 243120_at   | -0.0325638  | -0.86789489 | 0.388994278 | 0.571835152 |
| 243121_x_at | -0.00828025 | -0.29527638 | 0.768827051 | 0.867687337 |
| 243122_at   | 0.201857092 | 3.537501251 | 0.000797735 | 0.004219713 |
| 243123_at   | -0.01572233 | -0.52824414 | 0.599325907 | 0.751102701 |
| 243124_at   | 0.187623566 | 5.001330396 | 5.49E-06    | 6.51E-05    |
| 243125_x_at | 0.032549925 | 1.349943277 | 0.182228683 | 0.339029403 |
| 243126_x_at | 0.015030472 | 0.773254436 | 0.442481674 | 0.622795024 |
| 243127_x_at | 0.068433261 | 2.630665877 | 0.010872425 | 0.037291667 |
| 243128_at   | 0.032799797 | 1.771456352 | 0.081687508 | 0.186595036 |
| 243129_at   | 0.048741104 | 1.323528464 | 0.190803149 | 0.349740561 |
| 243130_at   | -0.07852665 | -2.01179121 | 0.048849955 | 0.125191    |
| 243131_x_at | -0.026261   | -0.73887147 | 0.462936013 | 0.640860373 |
| 243132_at   | 0.031122774 | 1.259509799 | 0.212842676 | 0.378120001 |
| 243133_at   | 0.045711316 | 1.262162038 | 0.211893635 | 0.376944603 |
| 243134_at   | 0.249663692 | 2.536678428 | 0.013876961 | 0.045575333 |
| 243135_x_at | 0.073914279 | 1.358876452 | 0.179396204 | 0.335182907 |
| 243136_at   | 0.001342034 | 0.055674471 | 0.955790637 | 0.977286032 |
| 243137_at   | 0.059547649 | 1.806366312 | 0.075999822 | 0.176372626 |
| 243138_at   | 0.039932662 | 1.321800849 | 0.191374389 | 0.350528861 |
| 243139_at   | -1.23398966 | -6.43819642 | 2.46E-08    | 8.57E-07    |
| 243140_at   | 0.026782674 | 0.900287978 | 0.371654134 | 0.554867765 |
| 243141_at   | 0.009307698 | 0.243538083 | 0.808439635 | 0.892334002 |
| 243142_at   | -0.01381488 | -0.55630627 | 0.580120903 | 0.736618558 |
| 243143_at   | -0.00581459 | -0.26696722 | 0.79043221  | 0.880683993 |
| 243144_at   | -0.00521811 | -0.14916843 | 0.881933202 | 0.936832616 |
| 243145_at   | 0.060599365 | 2.067717768 | 0.043093532 | 0.113477264 |
| 243146_at   | 0.073691942 | 1.833062696 | 0.071877291 | 0.169088319 |
| 243147_x_at | 0.236670715 | 5.657295036 | 4.85E-07    | 8.82E-06    |
| 243148_at   | -0.04066949 | -0.8117385  | 0.420228688 | 0.602275271 |
| 243149_at   | 0.261920497 | 3.736155059 | 0.0004258   | 0.00249867  |
| 243150_at   | 0.073726356 | 1.994438623 | 0.050765664 | 0.12903481  |
| 243151_at   | -0.06500245 | -1.932554   | 0.058131827 | 0.143406756 |
| 243152_at   | -0.01895403 | -0.49718316 | 0.620921308 | 0.767274584 |
| 243153_at   | -0.01338961 | -0.42123731 | 0.675123768 | 0.80478825  |
| 243154_at   | 0.05284197  | 1.66282201  | 0.101691348 | 0.220503117 |
| 243155_at   | -0.04750318 | -1.32657729 | 0.189798188 | 0.348527432 |
| 243156_at   | 0.003110017 | 0.101605533 | 0.919416854 | 0.957509858 |
| 243157_at   | 0.022051644 | 0.698849538 | 0.48741212  | 0.661768158 |
| 243158_at   | 0.4090962   | 4.772908371 | 1.25E-05    | 0.000128331 |
| 243159_x_at | -0.01163733 | -0.67855944 | 0.50008963  | 0.672767398 |
| 243160_at   | 0.045706011 | 1.315561477 | 0.193448203 | 0.353362367 |
| 243161_x_at | 0.052037731 | 2.104838949 | 0.039605785 | 0.106070247 |
| 243162_at   | 0.065780837 | 2.264074306 | 0.027287746 | 0.078899694 |
| 243163_at   | -0.34813653 | -5.65487576 | 4.89E-07    | 8.88E-06    |
| 243164_s_at | -0.03836363 | -1.38476909 | 0.171376008 | 0.324280902 |
| 243165_at   | -0.04470842 | -1.40016939 | 0.166738073 | 0.317993427 |
| 243166_at   | -0.01323772 | -0.38150646 | 0.704208117 | 0.825572351 |
| 243167_at   | 0.023082869 | 0.722117595 | 0.473095689 | 0.649233657 |
| 243168_at   | 0.014643806 | 0.497642252 | 0.6205996   | 0.767149943 |
| 243169_at   | -0.06547819 | -1.36982873 | 0.175969485 | 0.330563163 |
| 243170_at   | 0.030894409 | 0.812898635 | 0.41956849  | 0.601757163 |
| 243171_at   | 0.08561468  | 1.62676507  | 0.109156085 | 0.232570737 |
| 243172_at   | 0.027635888 | 0.792730426 | 0.431134544 | 0.611982374 |
| 243173_at   | 0.02523746  | 0.575268483 | 0.567313405 | 0.727007045 |
| 243174_at   | -0.00916398 | -0.30770254 | 0.759400313 | 0.861464548 |
| 243175_at   | -0.00147103 | -0.03799891 | 0.969817779 | 0.984801785 |
| 243176_at   | 0.09717357  | 1.700404338 | 0.094359963 | 0.208315327 |
| 243177_at   | 0.011318603 | 0.287010288 | 0.775117449 | 0.871200589 |
| 243178_at   | 0.398056912 | 6.603927854 | 1.30E-08    | 5.47E-07    |
| 243179_at   | -0.31931581 | -5.99840074 | 1.33E-07    | 3.16E-06    |
| 243180_at   | 0.015019035 | 0.491166169 | 0.625144514 | 0.77028366  |
| 243181_at   | 0.044216998 | 1.592030048 | 0.116761572 | 0.244589088 |
| 243182_at   | 0.021455372 | 0.608492575 | 0.545213692 | 0.709373364 |
| 243183_at   | 0.149735107 | 2.390293576 | 0.020070824 | 0.061751704 |
| 243184_at   | 0.071011251 | 1.235631571 | 0.221529017 | 0.388530944 |
| 243185_at   | -0.02205044 | -0.69934039 | 0.487107646 | 0.661585461 |
| 243186_at   | 0.03035397  | 1.019575936 | 0.312122994 | 0.493104202 |
| 243187_at   | -0.01800145 | -0.5140112  | 0.609178224 | 0.758488891 |
| 243188_at   | -0.00317875 | -0.13697753 | 0.891518363 | 0.941904388 |
| 243189_at   | 0.100445272 | 1.369930744 | 0.175937803 | 0.330559226 |
| 243190_at   | -0.03033188 | -1.0650797  | 0.291211296 | 0.469637523 |
| 243191_at   | -0.01639614 | -0.52557707 | 0.601166457 | 0.752523073 |
| 243192_at   | -0.07925479 | -1.64572988 | 0.10517624  | 0.226215724 |
| 243193_at   | -0.05177764 | -1.30891211 | 0.195676875 | 0.35624861  |
| 243194_at   | -0.00778994 | -0.20559512 | 0.83782016  | 0.910466823 |

|             |             |             |             |             |
|-------------|-------------|-------------|-------------|-------------|
| 243195_s_at | 0.037912606 | 1.051265018 | 0.297455316 | 0.476517061 |
| 243196_s_at | 0.083241647 | 2.345806304 | 0.022392209 | 0.067440704 |
| 243197_at   | -0.06116201 | -2.15060919 | 0.035645768 | 0.097657124 |
| 243198_at   | 0.270174992 | 2.688153429 | 0.009340191 | 0.033027283 |
| 243199_at   | 0.013338197 | 0.348409419 | 0.728782063 | 0.841729451 |
| 243200_at   | 0.030274589 | 0.926633383 | 0.357919843 | 0.540932182 |
| 243201_at   | 0.002917484 | 0.123138063 | 0.902419379 | 0.948159838 |
| 243202_at   | 0.023896456 | 0.512616292 | 0.610147771 | 0.759189353 |
| 243203_at   | -0.02912354 | -1.08898748 | 0.280620228 | 0.457768341 |
| 243204_at   | -0.05691621 | -2.18966558 | 0.032545064 | 0.090861068 |
| 243205_at   | -0.00744983 | -0.20976794 | 0.834576811 | 0.90879847  |
| 243206_at   | 0.056331532 | 2.034705461 | 0.046415855 | 0.120378874 |
| 243207_at   | 0.048377942 | 1.744542238 | 0.086310541 | 0.194714582 |
| 243208_x_at | -0.05159397 | -1.22875803 | 0.224077111 | 0.3912049   |
| 243209_at   | -0.0283307  | -0.54495607 | 0.587853029 | 0.742659644 |
| 243210_at   | 0.142588756 | 3.402144864 | 0.001210795 | 0.005979982 |
| 243211_at   | -0.00502647 | -0.17580259 | 0.861055489 | 0.92430289  |
| 243212_at   | 0.003215545 | 0.096700835 | 0.923294133 | 0.959875267 |
| 243213_at   | 0.242496689 | 4.303754638 | 6.47E-05    | 0.000510264 |
| 243214_at   | 0.028212129 | 0.985843829 | 0.328265149 | 0.51078852  |
| 243215_at   | -0.0071926  | -0.20664814 | 0.837001424 | 0.910083365 |
| 243216_x_at | 0.193659686 | 6.509237183 | 1.87E-08    | 7.04E-07    |
| 243217_at   | 0.01737325  | 0.508879202 | 0.612748737 | 0.761188322 |
| 243218_at   | 0.13214003  | 3.156015072 | 0.0025262   | 0.011098097 |
| 243219_x_at | -0.09512894 | -3.19231578 | 0.002270975 | 0.010142342 |
| 243220_at   | -0.06515121 | -2.07133608 | 0.042742236 | 0.112691642 |
| 243221_at   | 0.071407651 | 1.928698608 | 0.05861946  | 0.14427121  |
| 243222_at   | -0.02379885 | -0.93834606 | 0.351920383 | 0.535203517 |
| 243223_at   | -0.06978255 | -1.69418625 | 0.095542069 | 0.210208544 |
| 243224_at   | -0.05689215 | -1.45478811 | 0.151066902 | 0.295806255 |
| 243225_at   | 0.159324752 | 3.494365779 | 0.000912053 | 0.004721589 |
| 243226_at   | 0.051446732 | 1.706969081 | 0.093125034 | 0.206261473 |
| 243227_at   | -0.01925222 | -0.58381022 | 0.561589848 | 0.722874119 |
| 243228_at   | -0.07967732 | -2.59358915 | 0.011978743 | 0.040411125 |
| 243229_at   | -0.03696476 | -1.46960982 | 0.147019184 | 0.28997667  |
| 243230_at   | 0.053009767 | 1.976442235 | 0.052820281 | 0.133091504 |
| 243231_at   | -0.05132509 | -1.02790124 | 0.308222961 | 0.488686695 |
| 243232_at   | 0.002945288 | 0.112579223 | 0.91074915  | 0.952907881 |
| 243233_at   | 0.141800129 | 3.520710769 | 0.000840511 | 0.004409449 |
| 243234_at   | 0.023539194 | 0.845472414 | 0.401288126 | 0.583592103 |
| 243235_at   | -0.00163303 | -0.03933517 | 0.968756946 | 0.984194163 |
| 243236_at   | 0.02001764  | 0.447086825 | 0.656461462 | 0.792151788 |
| 243237_at   | 0.029764591 | 0.716633937 | 0.476448165 | 0.652272059 |
| 243238_at   | -0.03182585 | -0.7732014  | 0.442512812 | 0.622795024 |
| 243239_at   | 0.049683862 | 1.603083974 | 0.114296221 | 0.240722276 |
| 243240_at   | 0.200407756 | 3.027227094 | 0.003665266 | 0.015222385 |
| 243241_at   | 0.01805061  | 0.672104953 | 0.504159792 | 0.676148619 |
| 243242_at   | -0.07832388 | -1.93913528 | 0.057307409 | 0.141909503 |
| 243243_at   | -0.00766228 | -0.2399686  | 0.811192528 | 0.894140395 |
| 243244_at   | -0.74925382 | -7.01702915 | 2.62E-09    | 1.75E-07    |
| 243245_at   | 0.003453838 | 0.103978217 | 0.917541892 | 0.956314884 |
| 243246_at   | 0.00433233  | 0.108068283 | 0.914310914 | 0.954267438 |
| 243247_at   | -0.03530912 | -1.54144352 | 0.128595157 | 0.263064712 |
| 243248_at   | -0.01357923 | -0.34781034 | 0.729229606 | 0.842037358 |
| 243249_at   | 0.358407722 | 6.878528017 | 4.49E-09    | 2.57E-07    |
| 243250_at   | 0.011079952 | 0.495232605 | 0.622288968 | 0.767993222 |
| 243251_at   | -0.01818036 | -0.42534259 | 0.672145818 | 0.80270264  |
| 243252_at   | -0.0032641  | -0.09028404 | 0.92836957  | 0.962616417 |
| 243253_at   | -0.01722327 | -0.68847468 | 0.493872133 | 0.667456935 |
| 243254_at   | -0.07201242 | -2.00202995 | 0.049919786 | 0.127290184 |
| 243255_at   | 0.051381477 | 1.715148221 | 0.091605057 | 0.203694775 |
| 243256_at   | 0.190092723 | 3.327473802 | 0.00151838  | 0.007236022 |
| 243257_at   | -0.01024767 | -0.48184237 | 0.631713679 | 0.775264447 |
| 243258_at   | 0.008203633 | 0.243406327 | 0.808541206 | 0.892362413 |
| 243259_at   | -0.02029924 | -0.67000928 | 0.505485157 | 0.677151929 |
| 243260_x_at | -0.06265286 | -1.09635905 | 0.27740944  | 0.45403643  |
| 243261_at   | -0.08815183 | -2.3614633  | 0.021549228 | 0.065435391 |
| 243262_at   | 0.01249731  | 0.445854651 | 0.657346188 | 0.79265277  |
| 243263_at   | 0.008474459 | 0.158478882 | 0.874624663 | 0.932566939 |
| 243264_s_at | -0.0654664  | -1.83142084 | 0.072125295 | 0.169528963 |
| 243265_at   | 0.026724565 | 0.585509832 | 0.560454417 | 0.721922666 |
| 243266_at   | 0.014117943 | 0.3913089   | 0.696988983 | 0.820661054 |
| 243267_x_at | -0.04931653 | -1.02540996 | 0.309386535 | 0.489940579 |
| 243268_at   | -0.01089396 | -0.40775991 | 0.684936735 | 0.811645037 |
| 243269_s_at | -0.03855748 | -1.03703962 | 0.303980262 | 0.483813599 |



|             |             |             |             |             |
|-------------|-------------|-------------|-------------|-------------|
| 243270_at   | 0.009795728 | 0.243683882 | 0.808327241 | 0.89230255  |
| 243271_at   | 0.253845939 | 5.283909714 | 1.95E-06    | 2.78E-05    |
| 243272_at   | -0.03460945 | -1.10243394 | 0.274782797 | 0.45106122  |
| 243273_at   | -0.02857074 | -0.7348138  | 0.465385103 | 0.643174807 |
| 243274_x_at | -0.01991773 | -0.98336868 | 0.329471111 | 0.511938857 |
| 243275_at   | 0.207550163 | 4.005328865 | 0.000176987 | 0.001188384 |
| 243276_at   | 0.043221775 | 1.183123028 | 0.241540881 | 0.411863604 |
| 243277_x_at | -0.03115648 | -1.43964957 | 0.155290533 | 0.301684178 |
| 243278_at   | -0.60306337 | -6.25952464 | 4.90E-08    | 1.44E-06    |
| 243279_at   | -0.08652743 | -2.6636032  | 0.009968618 | 0.034806052 |
| 243280_at   | -0.00196703 | -0.04817527 | 0.961740467 | 0.980565427 |
| 243281_at   | 0.024280183 | 1.219905492 | 0.227390416 | 0.394889286 |
| 243282_at   | 0.001158142 | 0.035593589 | 0.971727461 | 0.985727566 |
| 243283_at   | -0.09315092 | -3.084687   | 0.003107922 | 0.013237325 |
| 243284_at   | 0.035305993 | 0.903892592 | 0.369755428 | 0.552972677 |
| 243285_at   | 0.032111922 | 1.01348973  | 0.31499513  | 0.496265468 |
| 243286_at   | 0.150214289 | 4.300508678 | 6.54E-05    | 0.00051488  |
| 243287_s_at | -0.02412475 | -0.58737304 | 0.559211006 | 0.720840422 |
| 243288_at   | 0.008219651 | 0.213703686 | 0.831520373 | 0.90684013  |
| 243289_at   | -0.04193617 | -1.71293807 | 0.092013752 | 0.204407923 |
| 243290_at   | 0.04270422  | 1.215142428 | 0.22918788  | 0.396902574 |
| 243291_at   | -0.01222225 | -0.34850561 | 0.728710215 | 0.841715126 |
| 243292_at   | 0.008648653 | 0.161402009 | 0.872332289 | 0.931171172 |
| 243293_at   | -0.07716123 | -1.06187461 | 0.292651831 | 0.471135609 |
| 243294_at   | -0.0013597  | -0.04124906 | 0.967237647 | 0.983388347 |
| 243295_at   | 0.02172551  | 0.65344341  | 0.516027793 | 0.686084458 |
| 243296_at   | 0.576088271 | 2.935564888 | 0.004750549 | 0.018909115 |
| 243297_at   | -0.02880501 | -0.4091293  | 0.683937146 | 0.81101737  |
| 243298_at   | -0.03316632 | -0.94756583 | 0.34724405  | 0.5302751   |
| 243299_at   | 0.013462954 | 0.526374157 | 0.600616113 | 0.752108022 |
| 243300_at   | 0.029517936 | 1.053760115 | 0.296320829 | 0.475312988 |
| 243301_at   | -0.0776484  | -2.60647992 | 0.011582991 | 0.039327436 |
| 243302_at   | -0.12358047 | -3.71092988 | 0.000461587 | 0.002678363 |
| 243303_at   | 0.030684121 | 0.645774485 | 0.520947683 | 0.68983195  |
| 243304_at   | 0.03483007  | 0.929743178 | 0.356320543 | 0.53950746  |
| 243305_at   | 0.215209715 | 4.326774536 | 5.98E-05    | 0.000477588 |
| 243306_s_at | 0.03472317  | 0.998352596 | 0.322215519 | 0.504110523 |
| 243307_at   | -0.03746218 | -1.31311102 | 0.194267289 | 0.354288487 |
| 243308_at   | -0.34358569 | -6.2401525  | 5.28E-08    | 1.53E-06    |
| 243309_at   | 0.000433498 | 0.006359652 | 0.994947379 | 0.997603667 |
| 243310_at   | -0.00301265 | -0.07122783 | 0.943459106 | 0.970852223 |
| 243311_at   | -0.0460034  | -1.77123954 | 0.08172391  | 0.186661471 |
| 243312_at   | -0.03643751 | -0.92951911 | 0.35643562  | 0.539628074 |
| 243313_at   | -0.02731865 | -0.72953563 | 0.468581877 | 0.645437381 |
| 243314_at   | -0.00793999 | -0.18491952 | 0.853931042 | 0.920010755 |
| 243315_at   | 0.02414213  | 0.51924993  | 0.605543277 | 0.755525966 |
| 243316_x_at | 0.093710614 | 2.785296054 | 0.007193238 | 0.026630235 |
| 243317_at   | -0.27187192 | -5.14557904 | 3.25E-06    | 4.22E-05    |
| 243318_at   | 0.299647376 | 7.269470355 | 9.82E-10    | 9.24E-08    |
| 243319_at   | -0.17002241 | -3.69074659 | 0.000492275 | 0.002827499 |
| 243320_at   | -0.06668083 | -1.68762818 | 0.096801957 | 0.212332421 |
| 243321_at   | -0.03933682 | -0.92861605 | 0.356899663 | 0.539952192 |
| 243322_at   | -0.08399597 | -2.57429794 | 0.012593989 | 0.042112984 |
| 243323_s_at | -0.01689689 | -0.5587005  | 0.578496144 | 0.735286663 |
| 243324_x_at | -0.02137489 | -0.99471847 | 0.323965359 | 0.505981471 |
| 243325_at   | -0.01667941 | -0.48188353 | 0.631684607 | 0.775264272 |
| 243326_at   | -0.0133047  | -0.45594959 | 0.650112435 | 0.788037861 |
| 243327_at   | 0.015422886 | 0.444935416 | 0.658006538 | 0.793140257 |
| 243328_at   | -0.02012122 | -0.5593893  | 0.578029124 | 0.734985706 |
| 243329_at   | 0.084020343 | 2.116947175 | 0.038522571 | 0.103751157 |
| 243330_at   | 0.061954187 | 1.486146448 | 0.142604072 | 0.283697361 |
| 243331_at   | 0.065511052 | 2.142128147 | 0.036352279 | 0.099201415 |
| 243332_at   | 0.280101833 | 2.82935054  | 0.006378036 | 0.024093245 |
| 243333_at   | 0.012467598 | 0.344163315 | 0.731956159 | 0.843586174 |
| 243334_at   | -0.10579953 | -2.55342346 | 0.013291936 | 0.044000653 |
| 243335_at   | -0.01826368 | -0.66473987 | 0.508825983 | 0.679895082 |
| 243336_at   | -0.01313388 | -0.49112044 | 0.625176657 | 0.770284491 |
| 243337_at   | 0.030897861 | 0.764995705 | 0.447345824 | 0.627064926 |
| 243338_at   | -0.0282331  | -0.58179049 | 0.56294062  | 0.723769229 |
| 243339_at   | -0.42095155 | -4.09159806 | 0.000132759 | 0.000936143 |
| 243340_at   | -0.06677938 | -1.4781714  | 0.144720123 | 0.28674551  |
| 243341_at   | 0.227171575 | 2.992541652 | 0.004045453 | 0.016543087 |
| 243342_at   | -0.0080951  | -0.1634623  | 0.87071723  | 0.930202573 |
| 243343_at   | -0.08495038 | -2.38682612 | 0.020243698 | 0.062197947 |
| 243344_at   | -0.06664896 | -1.37758911 | 0.1735719   | 0.327311066 |

|             |             |             |             |             |
|-------------|-------------|-------------|-------------|-------------|
| 243345_at   | -0.01834007 | -0.82025436 | 0.415397127 | 0.597583893 |
| 243346_at   | 0.001721887 | 0.064192884 | 0.949035248 | 0.97385446  |
| 243347_at   | -0.00270933 | -0.0699073  | 0.944505597 | 0.971425124 |
| 243348_at   | -0.01323454 | -0.52054279 | 0.60464775  | 0.754880682 |
| 243349_at   | -0.1156836  | -3.42556126 | 0.001127186 | 0.005626738 |
| 243350_at   | 0.114516794 | 3.544014706 | 0.000781705 | 0.004154098 |
| 243351_at   | 0.061481584 | 2.586618753 | 0.012197822 | 0.041028455 |
| 243352_at   | 0.161551642 | 3.208147915 | 0.002167427 | 0.009752986 |
| 243353_at   | 0.015851384 | 0.539535185 | 0.591563087 | 0.745347436 |
| 243354_at   | -0.00729895 | -0.1462993  | 0.884187532 | 0.938058401 |
| 243355_at   | -0.00202122 | -0.05437357 | 0.956822597 | 0.977893743 |
| 243356_at   | 0.040464951 | 0.852913679 | 0.397181923 | 0.579506203 |
| 243357_at   | -0.49212372 | -5.93444731 | 1.70E-07    | 3.81E-06    |
| 243358_at   | -0.07810838 | -1.90848425 | 0.061233577 | 0.14940498  |
| 243359_at   | 0.01103007  | 0.435232592 | 0.664993361 | 0.798207461 |
| 243360_at   | 0.004700112 | 0.161599064 | 0.872177794 | 0.931072122 |
| 243361_at   | 0.06052118  | 1.372490921 | 0.175144156 | 0.329448931 |
| 243362_s_at | 0.037305282 | 0.934065849 | 0.354105174 | 0.537264681 |
| 243363_at   | 0.040719714 | 1.251001109 | 0.215908555 | 0.381882828 |
| 243364_at   | -0.0074582  | -0.2172503  | 0.828768365 | 0.904981855 |
| 243365_s_at | 0.217121342 | 4.070115286 | 0.000142652 | 0.000993207 |
| 243366_s_at | -0.05884772 | -1.15007372 | 0.254788037 | 0.428019582 |
| 243367_at   | -0.27103709 | -5.99276465 | 1.36E-07    | 3.21E-06    |
| 243368_at   | 0.058646861 | 1.704212324 | 0.093641993 | 0.207115558 |
| 243369_at   | -0.02644567 | -0.84512783 | 0.401478906 | 0.583793566 |
| 243370_at   | -0.119621   | -3.85984645 | 0.000285514 | 0.001786197 |
| 243371_at   | -0.02754808 | -0.81121666 | 0.420525858 | 0.60253083  |
| 243372_at   | -0.06328633 | -1.50353174 | 0.13807565  | 0.27714349  |
| 243373_at   | -0.05053009 | -1.76208379 | 0.08327349  | 0.189253092 |
| 243374_x_at | -0.00931315 | -0.22759385 | 0.820754676 | 0.90042468  |
| 243375_at   | -0.03224771 | -0.95705057 | 0.342475839 | 0.525453336 |
| 243376_at   | -0.08568844 | -2.31182362 | 0.024323742 | 0.072154299 |
| 243377_at   | 0.051327031 | 1.621968198 | 0.110181856 | 0.234231437 |
| 243378_at   | -0.11231745 | -3.68291375 | 0.000504703 | 0.002888116 |
| 243379_at   | -0.00097054 | -0.03646584 | 0.971034924 | 0.985267245 |
| 243380_at   | 0.001654957 | 0.04705285  | 0.96263119  | 0.980994217 |
| 243381_at   | -0.00586906 | -0.18409528 | 0.854574654 | 0.920482273 |
| 243382_at   | -0.04877685 | -1.36512695 | 0.177434384 | 0.332574127 |
| 243383_at   | -0.05652108 | -1.3484921  | 0.182692008 | 0.339563632 |
| 243384_at   | 0.016601707 | 0.471288383 | 0.639185713 | 0.78062306  |
| 243385_at   | -0.04881195 | -1.23002213 | 0.22360689  | 0.390750703 |
| 243386_at   | -0.01849501 | -0.59145434 | 0.556492163 | 0.71870388  |
| 243387_at   | -0.03352458 | -1.06898067 | 0.289464601 | 0.467725937 |
| 243388_at   | 0.013253532 | 0.206577444 | 0.837056383 | 0.910083365 |
| 243389_at   | -0.08529123 | -1.96509778 | 0.054151762 | 0.135803295 |
| 243390_at   | 0.319438421 | 4.141716603 | 0.000112189 | 0.000811059 |
| 243391_x_at | -0.02330274 | -0.83572667 | 0.406705355 | 0.589076376 |
| 243392_at   | 0.032720314 | 0.866948181 | 0.38950854  | 0.572415384 |
| 243393_at   | 0.030882565 | 0.772026079 | 0.44320317  | 0.623410948 |
| 243394_at   | -0.02190883 | -0.5219157  | 0.603697438 | 0.754387941 |
| 243395_at   | 0.253447499 | 4.163833248 | 0.000104126 | 0.000762384 |
| 243396_at   | -0.04436775 | -1.55788891 | 0.124647428 | 0.256988645 |
| 243397_at   | -0.04239224 | -1.04966422 | 0.298184745 | 0.477309192 |
| 243398_at   | 0.03921936  | 0.719937887 | 0.474426673 | 0.65043847  |
| 243399_at   | -0.02700772 | -0.64307224 | 0.522687153 | 0.691511034 |
| 243400_x_at | 0.02170609  | 0.510656364 | 0.611511228 | 0.760297664 |
| 243401_at   | -0.01770513 | -0.59223184 | 0.555974964 | 0.718285003 |
| 243402_at   | -0.0424557  | -1.26637801 | 0.210391513 | 0.375137115 |
| 243403_x_at | 0.042159411 | 1.090659816 | 0.279889558 | 0.457003246 |
| 243404_at   | 0.054011018 | 1.271729344 | 0.208496269 | 0.37261777  |
| 243405_at   | 0.093022642 | 2.701192818 | 0.009021355 | 0.032100511 |
| 243406_at   | -0.02748214 | -0.60180577 | 0.549626125 | 0.712690537 |
| 243407_at   | -0.05537062 | -1.57794131 | 0.119965675 | 0.249441981 |
| 243408_at   | 0.034236808 | 0.981208381 | 0.330526068 | 0.51301385  |
| 243409_at   | 0.010452483 | 0.32791124  | 0.744148179 | 0.851798142 |
| 243410_at   | -0.00282107 | -0.08409044 | 0.933271307 | 0.965346932 |
| 243411_at   | 0.026326901 | 0.882629593 | 0.381044948 | 0.563877382 |
| 243412_at   | -0.03304715 | -1.57193246 | 0.12135354  | 0.251683716 |
| 243413_at   | 0.099610134 | 1.816406794 | 0.074426693 | 0.173587192 |
| 243414_at   | 0.088531272 | 2.15594105  | 0.035207775 | 0.096694273 |
| 243415_at   | -0.05792585 | -1.27928605 | 0.205841624 | 0.369234351 |
| 243416_at   | 0.078239402 | 1.454133998 | 0.151247524 | 0.296056165 |
| 243417_at   | -0.17680418 | -2.68451881 | 0.009430884 | 0.033279516 |
| 243418_at   | -0.02261837 | -0.57980644 | 0.56426909  | 0.724800023 |
| 243419_at   | -0.0244841  | -0.78235531 | 0.437157632 | 0.617687287 |

|             |             |             |             |             |
|-------------|-------------|-------------|-------------|-------------|
| 243420_at   | 0.025979675 | 0.805874434 | 0.423575335 | 0.605168079 |
| 243421_at   | -0.02077491 | -1.20879311 | 0.231600053 | 0.399933139 |
| 243422_at   | 0.020602996 | 0.9434912   | 0.349305707 | 0.532368389 |
| 243423_at   | -0.06607316 | -1.96337219 | 0.054356787 | 0.136202822 |
| 243424_at   | 0.051575177 | 1.597041438 | 0.115638626 | 0.242851439 |
| 243425_at   | 0.017329381 | 0.396041469 | 0.693513622 | 0.818207301 |
| 243426_at   | -0.13180552 | -3.15427451 | 0.00253909  | 0.011143769 |
| 243427_at   | -0.09394029 | -2.05187777 | 0.044661023 | 0.11682023  |
| 243428_at   | 0.237361094 | 5.564981609 | 6.85E-07    | 1.17E-05    |
| 243429_at   | -0.06146985 | -1.36087537 | 0.17876702  | 0.334356797 |
| 243430_at   | -0.54765221 | -6.97219115 | 3.12E-09    | 1.97E-07    |
| 243431_at   | 0.541945019 | 5.177912418 | 2.88E-06    | 3.82E-05    |
| 243432_at   | -0.02543175 | -0.68501272 | 0.496038176 | 0.669170158 |
| 243433_at   | 0.024760571 | 0.698779603 | 0.487455508 | 0.661786858 |
| 243434_at   | 0.035155571 | 0.910377863 | 0.366354957 | 0.549557026 |
| 243435_at   | 0.004314209 | 0.132841596 | 0.894774034 | 0.943783829 |
| 243436_at   | -0.04890762 | -1.55008615 | 0.126508233 | 0.259901901 |
| 243437_at   | -0.03877234 | -1.18018821 | 0.24269674  | 0.413361384 |
| 243438_at   | -0.26431561 | -6.04139444 | 1.13E-07    | 2.77E-06    |
| 243439_at   | -0.05693554 | -1.40462119 | 0.165415567 | 0.316105209 |
| 243440_at   | -0.16596198 | -2.52436458 | 0.014321945 | 0.046717494 |
| 243441_at   | 0.021800137 | 0.620195895 | 0.53753466  | 0.703531761 |
| 243442_x_at | 0.31457952  | 5.87279634  | 2.15E-07    | 4.56E-06    |
| 243443_at   | 0.007540751 | 0.234014172 | 0.815790091 | 0.896885458 |
| 243444_at   | -0.0241175  | -0.79953189 | 0.427212997 | 0.608458522 |
| 243445_at   | 0.025727622 | 0.722833246 | 0.472659155 | 0.648833828 |
| 243446_at   | 0.040048595 | 1.221764145 | 0.22669181  | 0.394183735 |
| 243447_at   | -0.15804019 | -2.83944166 | 0.006203723 | 0.023554226 |
| 243448_at   | -0.03121576 | -0.99612146 | 0.323289066 | 0.505278368 |
| 243449_at   | -0.00203538 | -0.05258269 | 0.958243357 | 0.978674378 |
| 243450_at   | 0.185518075 | 3.306732376 | 0.001616119 | 0.007626988 |
| 243451_at   | -0.02101983 | -0.6163551  | 0.540048609 | 0.705720987 |
| 243452_at   | -0.14160936 | -3.39070399 | 0.001253751 | 0.006156754 |
| 243453_at   | -0.01781328 | -0.55256476 | 0.582664339 | 0.738547169 |
| 243454_at   | 0.049830034 | 1.605257535 | 0.113816432 | 0.23991529  |
| 243455_at   | 0.093342221 | 2.222682143 | 0.030111301 | 0.085372978 |
| 243456_at   | -0.0288844  | -0.6528778  | 0.516389804 | 0.686236699 |
| 243457_s_at | 0.018494669 | 0.458468157 | 0.648312924 | 0.786621089 |
| 243458_at   | -0.01142229 | -0.30802609 | 0.759155344 | 0.861347428 |
| 243459_x_at | 0.083023472 | 1.771911198 | 0.081611185 | 0.186518388 |
| 243460_at   | -0.04651405 | -1.15690574 | 0.25200789  | 0.424864636 |
| 243461_at   | 0.103872706 | 3.725917967 | 0.000439991 | 0.002569107 |
| 243462_s_at | 0.475049673 | 6.367063348 | 3.24E-08    | 1.05E-06    |
| 243463_s_at | 0.170841961 | 3.153588803 | 0.002544185 | 0.011163937 |
| 243464_at   | -0.01277052 | -0.41476943 | 0.679826123 | 0.808135114 |
| 243465_at   | 0.019923287 | 0.38452711  | 0.701980565 | 0.824020051 |
| 243466_at   | -0.00412239 | -0.12671283 | 0.899601725 | 0.946244733 |
| 243467_at   | -0.00274692 | -0.0956293  | 0.924141457 | 0.960290961 |
| 243468_at   | 0.006827772 | 0.204569624 | 0.838617664 | 0.910897249 |
| 243469_at   | 0.321745591 | 4.832045229 | 1.01E-05    | 0.000107957 |
| 243470_at   | 0.026653209 | 0.732603742 | 0.466722132 | 0.644180318 |
| 243471_at   | 0.009125137 | 0.354138828 | 0.724506707 | 0.839045541 |
| 243472_at   | -0.06923411 | -1.47643592 | 0.145183856 | 0.287398287 |
| 243473_at   | 0.151804221 | 2.801200358 | 0.006888469 | 0.025702075 |
| 243474_at   | 0.058509073 | 1.796614874 | 0.077554203 | 0.179244579 |
| 243475_at   | 0.059344316 | 1.931832913 | 0.058222767 | 0.143563691 |
| 243476_at   | 0.014688942 | 0.349393701 | 0.728046959 | 0.84128958  |
| 243477_at   | -0.01852885 | -0.73290245 | 0.466541296 | 0.644016049 |
| 243478_at   | -0.02213331 | -0.96584385 | 0.338093787 | 0.520899483 |
| 243479_at   | -0.06178797 | -2.28471407 | 0.02596939  | 0.075996856 |
| 243480_at   | 0.078532492 | 2.245619299 | 0.028516358 | 0.081790083 |
| 243481_at   | 0.087694756 | 2.241055157 | 0.028827647 | 0.082497611 |
| 243482_at   | 0.144514685 | 3.451188463 | 0.001041966 | 0.005274845 |
| 243483_at   | 0.003597656 | 0.121284971 | 0.903880496 | 0.948994801 |
| 243484_x_at | -0.17527889 | -4.67822041 | 1.75E-05    | 0.00017063  |
| 243485_at   | -0.06283497 | -1.84411033 | 0.070227102 | 0.16608052  |
| 243486_at   | -0.01420775 | -0.42731679 | 0.670715613 | 0.801759378 |
| 243487_at   | -0.03636793 | -0.89311434 | 0.375451218 | 0.558410125 |
| 243488_at   | -0.00547188 | -0.16958104 | 0.865924032 | 0.927595963 |
| 243489_at   | 0.113000579 | 2.214384102 | 0.03070739  | 0.086694546 |
| 243490_at   | -0.02404663 | -0.60656918 | 0.546481037 | 0.710434886 |
| 243491_at   | -0.06244651 | -2.10740733 | 0.039373825 | 0.105535263 |
| 243492_at   | 0.070591019 | 2.287339464 | 0.025805809 | 0.075607265 |
| 243493_at   | -0.00325903 | -0.10497313 | 0.916755823 | 0.955822194 |
| 243494_at   | 0.012679594 | 0.450507059 | 0.654008256 | 0.790206196 |

|             |             |             |             |             |
|-------------|-------------|-------------|-------------|-------------|
| 243495_s_at | 0.278993775 | 2.055037606 | 0.044344451 | 0.116134907 |
| 243496_at   | 0.100812922 | 2.073502487 | 0.042533095 | 0.1122727   |
| 243497_at   | 0.046900816 | 1.880786915 | 0.064975667 | 0.156535914 |
| 243498_at   | 0.067490448 | 1.75553601  | 0.084396589 | 0.191309209 |
| 243499_at   | -0.09095299 | -2.05594028 | 0.044254372 | 0.115953356 |
| 243500_at   | 0.015632616 | 0.518388076 | 0.606140598 | 0.755996864 |
| 243501_at   | -0.17337133 | -3.88579214 | 0.000262339 | 0.001659511 |
| 243502_at   | 0.022099079 | 0.524727936 | 0.601752999 | 0.752932223 |
| 243503_at   | 0.025985116 | 0.841812699 | 0.403317169 | 0.585666275 |
| 243504_at   | -0.03969777 | -1.00612182 | 0.31849588  | 0.499814525 |
| 243505_at   | -0.04393129 | -1.14832749 | 0.255502128 | 0.428830596 |
| 243506_at   | -0.06967538 | -2.75211796 | 0.007869355 | 0.028693579 |
| 243507_s_at | -0.04647409 | -1.62963652 | 0.108545766 | 0.23162373  |
| 243508_at   | -0.0252666  | -1.00631178 | 0.318405298 | 0.499769696 |
| 243509_at   | -0.01623921 | -0.33047965 | 0.742216925 | 0.850597693 |
| 243510_at   | 0.020913016 | 0.51725007  | 0.606929724 | 0.756664339 |
| 243511_at   | 0.026414532 | 0.796551753 | 0.428928638 | 0.610029508 |
| 243512_x_at | 0.000865599 | 0.030150056 | 0.97604989  | 0.987986585 |
| 243513_at   | -0.03916715 | -1.27053425 | 0.208918421 | 0.373210571 |
| 243514_at   | 0.398208286 | 5.035115522 | 4.86E-06    | 5.88E-05    |
| 243515_at   | 0.086423263 | 2.15910214  | 0.034950334 | 0.09613493  |
| 243516_at   | 0.051632215 | 1.712526027 | 0.092090112 | 0.204516561 |
| 243517_at   | -0.06617529 | -1.62512468 | 0.109505995 | 0.233149536 |
| 243518_at   | -0.05817584 | -1.10798906 | 0.272396185 | 0.448362195 |
| 243519_at   | 0.083727539 | 2.119148356 | 0.03832845  | 0.10335346  |
| 243520_x_at | -0.01379061 | -0.50522849 | 0.615294429 | 0.763311787 |
| 243521_at   | -0.01925031 | -0.56776852 | 0.572362418 | 0.730607255 |
| 243522_at   | -0.01028234 | -0.27687321 | 0.782852321 | 0.87588524  |
| 243523_at   | -0.03209709 | -0.88273848 | 0.380986586 | 0.563828355 |
| 243524_at   | 0.171391331 | 4.355873435 | 5.41E-05    | 0.000440209 |
| 243525_at   | -0.02144146 | -0.90142393 | 0.371055111 | 0.554306749 |
| 243526_at   | -0.0647967  | -1.88183847 | 0.064830138 | 0.156311423 |
| 243527_at   | 0.122782078 | 3.194692272 | 0.002255141 | 0.010091795 |
| 243528_at   | 0.131182084 | 2.437932168 | 0.017826034 | 0.056100354 |
| 243529_at   | -0.04552629 | -1.14027781 | 0.25881235  | 0.432823662 |
| 243530_at   | -0.04907168 | -2.5492817  | 0.013434518 | 0.044396913 |
| 243531_at   | 0.020461131 | 0.571829635 | 0.569625737 | 0.728445504 |
| 243532_at   | -0.0661811  | -2.21636631 | 0.030564061 | 0.086377197 |
| 243533_x_at | -0.67422732 | -5.07967285 | 4.13E-06    | 5.15E-05    |
| 243534_at   | -0.09800284 | -2.69328769 | 0.009213439 | 0.032672141 |
| 243535_at   | -0.04126029 | -1.50334673 | 0.138123236 | 0.277226554 |
| 243536_x_at | -0.01842281 | -0.61628443 | 0.54009492  | 0.705720987 |
| 243537_at   | -0.41007237 | -7.51597384 | 3.77E-10    | 4.86E-08    |
| 243538_at   | -0.05665919 | -1.35528386 | 0.180531259 | 0.336782695 |
| 243539_at   | -0.04633553 | -0.8550741  | 0.395994658 | 0.578688908 |
| 243540_at   | -0.01176197 | -0.27100368 | 0.787341081 | 0.878663537 |
| 243541_at   | -0.00046986 | -0.01798412 | 0.985712652 | 0.993157108 |
| 243542_at   | -0.295462   | -4.16809755 | 0.000102637 | 0.000753747 |
| 243543_at   | 0.107130456 | 2.050252195 | 0.044824644 | 0.117138521 |
| 243544_at   | -0.02471632 | -0.51818286 | 0.606282868 | 0.756132104 |
| 243545_at   | 0.007962083 | 0.264951872 | 0.791976836 | 0.881513272 |
| 243546_at   | -0.0265693  | -0.48439756 | 0.629910398 | 0.773897511 |
| 243547_at   | -0.05031696 | -1.6437629  | 0.10558345  | 0.226785964 |
| 243548_x_at | 0.038871333 | 1.235473017 | 0.221587554 | 0.388530944 |
| 243549_at   | -0.18773462 | -5.78413915 | 3.00E-07    | 5.99E-06    |
| 243550_at   | 0.006053124 | 0.239181858 | 0.811799615 | 0.894495677 |
| 243551_at   | 0.134643247 | 3.554803793 | 0.000755826 | 0.004048829 |
| 243552_at   | -0.0880967  | -1.4843031  | 0.143090997 | 0.284412846 |
| 243553_x_at | -0.05225829 | -1.87353144 | 0.065987328 | 0.158434816 |
| 243554_at   | 0.082029884 | 2.658621277 | 0.010100766 | 0.035175248 |
| 243555_at   | -0.05529324 | -1.63433169 | 0.107553787 | 0.230067193 |
| 243556_at   | -0.9922825  | -6.1972037  | 6.22E-08    | 1.75E-06    |
| 243557_at   | 0.103681069 | 2.819943265 | 0.006544596 | 0.024619634 |
| 243558_at   | 0.122540366 | 3.809429548 | 0.000336295 | 0.002048199 |
| 243559_at   | 0.030424269 | 0.798800975 | 0.427633401 | 0.608869093 |
| 243560_at   | 0.009864089 | 0.357634395 | 0.721902584 | 0.837398004 |
| 243561_at   | 0.219785453 | 3.921433879 | 0.000233433 | 0.001505204 |
| 243562_at   | -0.06331074 | -2.22077967 | 0.030247056 | 0.085654635 |
| 243563_at   | -0.00199709 | -0.08494662 | 0.932593549 | 0.965056973 |
| 243564_at   | 0.010019609 | 0.254628804 | 0.799901779 | 0.886791117 |
| 243565_at   | -0.02675243 | -0.86173852 | 0.392346072 | 0.575154349 |
| 243566_at   | 0.016543009 | 0.553012158 | 0.582359921 | 0.73822412  |
| 243567_at   | 0.036106567 | 0.737379406 | 0.463835722 | 0.641629923 |
| 243568_at   | 0.054540244 | 1.86432333  | 0.067290394 | 0.160872061 |
| 243569_at   | -0.00309081 | -0.08551569 | 0.932143102 | 0.964760879 |

|             |             |             |             |             |
|-------------|-------------|-------------|-------------|-------------|
| 243570_at   | -0.04594379 | -1.32325189 | 0.190894511 | 0.34986182  |
| 243571_at   | -0.01419023 | -0.32666324 | 0.745087181 | 0.852326802 |
| 243572_at   | 0.008570064 | 0.317528792 | 0.751971715 | 0.857266523 |
| 243573_at   | 0.014902656 | 0.468900885 | 0.640881278 | 0.781763908 |
| 243574_at   | -0.01172859 | -0.306916   | 0.759995927 | 0.86179022  |
| 243575_at   | 0.028363177 | 0.851128926 | 0.3981644   | 0.580522734 |
| 243576_at   | 0.013151725 | 0.367290121 | 0.714726516 | 0.832683127 |
| 243577_at   | -0.13393475 | -4.9040209  | 7.81E-06    | 8.70E-05    |
| 243578_at   | 0.08448855  | 2.218637498 | 0.030400561 | 0.085991259 |
| 243579_at   | 0.204266718 | 3.773553614 | 0.000377593 | 0.002257575 |
| 243580_at   | 0.107079721 | 2.113625138 | 0.038817163 | 0.104336673 |
| 243581_at   | 0.006878836 | 0.161302156 | 0.872410578 | 0.931210259 |
| 243582_at   | -0.73378284 | -6.35813995 | 3.35E-08    | 1.08E-06    |
| 243583_at   | -0.01143158 | -0.31740561 | 0.752064696 | 0.85730736  |
| 243584_at   | -0.08660742 | -1.90027322 | 0.062323366 | 0.151534511 |
| 243585_at   | -0.04064573 | -0.85923463 | 0.39371442  | 0.576393122 |
| 243586_at   | 0.059436023 | 1.334323363 | 0.187262914 | 0.345247892 |
| 243587_x_at | 0.007036121 | 0.269321798 | 0.788628655 | 0.879415421 |
| 243588_at   | 0.072834328 | 1.949242779 | 0.0560607   | 0.139502496 |
| 243589_at   | 0.403780939 | 3.951302544 | 0.000211592 | 0.001381114 |
| 243590_at   | 0.049498751 | 1.445274167 | 0.153710666 | 0.299408868 |
| 243591_at   | -0.11604799 | -2.55441449 | 0.013258023 | 0.043907193 |
| 243592_at   | -0.04137297 | -1.23134874 | 0.223114195 | 0.390284545 |
| 243593_s_at | 0.128540006 | 3.668043775 | 0.000529126 | 0.003005551 |
| 243594_x_at | -0.03903055 | -1.07787118 | 0.285510885 | 0.463317798 |
| 243595_at   | 0.031098293 | 1.019903254 | 0.311969033 | 0.49294725  |
| 243596_at   | -0.00059494 | -0.01966228 | 0.984379615 | 0.992440473 |
| 243597_at   | -0.04471801 | -1.07191447 | 0.288155742 | 0.466299386 |
| 243598_at   | 0.290527253 | 5.54627127  | 7.35E-07    | 1.24E-05    |
| 243599_at   | -0.05269948 | -1.28388708 | 0.204237681 | 0.367271172 |
| 243600_at   | 0.120200332 | 3.609205516 | 0.000637296 | 0.003511965 |
| 243601_at   | -0.03659328 | -1.44513029 | 0.153750922 | 0.299467419 |
| 243602_at   | -0.01609464 | -0.49577232 | 0.621910402 | 0.767711163 |
| 243603_at   | 0.000229648 | 0.005678294 | 0.995488699 | 0.997877782 |
| 243604_at   | -0.04360179 | -1.53779989 | 0.129483161 | 0.264385117 |
| 243605_at   | -0.10794129 | -2.53325863 | 0.013999269 | 0.045882615 |
| 243606_at   | -0.03628033 | -0.44516882 | 0.657838841 | 0.792990788 |
| 243607_at   | 0.061161351 | 1.151994601 | 0.254004174 | 0.427134535 |
| 243608_at   | 0.18336804  | 4.793425436 | 1.16E-05    | 0.000120914 |
| 243609_at   | 0.032863624 | 1.065429525 | 0.291054361 | 0.469460137 |
| 243610_at   | 0.471185504 | 2.866177202 | 0.005762944 | 0.022153577 |
| 243611_at   | 0.004159224 | 0.111748784 | 0.911404715 | 0.953096837 |
| 243612_at   | 0.186626437 | 3.62157815  | 0.00061293  | 0.003397798 |
| 243613_at   | -0.03313318 | -1.29289985 | 0.201122846 | 0.363250602 |
| 243614_s_at | 0.077746591 | 1.615274067 | 0.111626381 | 0.236570856 |
| 243615_at   | 0.026571272 | 0.893427543 | 0.375284924 | 0.558311435 |
| 243616_at   | 0.013569    | 0.318717787 | 0.751074421 | 0.856799991 |
| 243617_at   | -0.01259655 | -0.26527772 | 0.791727036 | 0.881349066 |
| 243618_s_at | 0.018108892 | 0.316493574 | 0.752753239 | 0.857708385 |
| 243619_at   | 0.042418362 | 0.999597234 | 0.321617681 | 0.503520572 |
| 243620_at   | -0.02845693 | -1.00984543 | 0.316723409 | 0.497924672 |
| 243621_at   | 0.088666684 | 2.275873807 | 0.026526984 | 0.077249231 |
| 243622_at   | 0.065158768 | 1.755168807 | 0.084459944 | 0.191423693 |
| 243623_at   | 0.060704559 | 1.264228816 | 0.211156266 | 0.376040247 |
| 243624_at   | -0.31198643 | -5.54883994 | 7.28E-07    | 1.23E-05    |
| 243625_at   | -0.02270263 | -0.83312212 | 0.408160653 | 0.590321216 |
| 243626_at   | 0.158719304 | 2.376922829 | 0.020744797 | 0.063416539 |
| 243627_at   | -0.02322238 | -1.09273095 | 0.278986487 | 0.455885341 |
| 243628_at   | -0.03776607 | -1.19432462 | 0.237165758 | 0.406543881 |
| 243629_x_at | 0.151028087 | 3.093546664 | 0.003029392 | 0.012950983 |
| 243630_at   | -0.01224867 | -0.37294528 | 0.710535573 | 0.829937444 |
| 243631_at   | 0.001068773 | 0.039943053 | 0.96827438  | 0.983882832 |
| 243632_at   | -0.01629383 | -0.49281246 | 0.623987754 | 0.769256029 |
| 243633_at   | 0.021464152 | 0.620639681 | 0.537244574 | 0.703316867 |
| 243634_at   | -0.09138412 | -2.49407098 | 0.015472104 | 0.049904681 |
| 243635_at   | 0.012164633 | 0.358039048 | 0.721601339 | 0.837285441 |
| 243636_s_at | 0.15094287  | 2.193527732 | 0.032251713 | 0.090284595 |
| 243637_at   | 0.083805622 | 2.185609061 | 0.032855698 | 0.09159671  |
| 243638_at   | 0.0578642   | 1.933212902 | 0.058048835 | 0.143267801 |
| 243639_at   | -0.10670981 | -3.56625489 | 0.000729252 | 0.003929557 |
| 243640_x_at | 0.251039563 | 5.090987766 | 3.96E-06    | 4.98E-05    |
| 243641_at   | -0.04658178 | -1.40220406 | 0.166132622 | 0.317163569 |
| 243642_x_at | -0.09226194 | -2.42261213 | 0.01852203  | 0.057883124 |
| 243643_x_at | 0.078400459 | 2.426722178 | 0.018332954 | 0.057412681 |
| 243644_at   | -0.02628953 | -1.25293541 | 0.215208731 | 0.381051012 |

|             |             |             |             |             |
|-------------|-------------|-------------|-------------|-------------|
| 243645_at   | 0.163178138 | 4.299700939 | 6.56E-05    | 0.000516215 |
| 243646_at   | -0.24239428 | -5.07744641 | 4.16E-06    | 5.18E-05    |
| 243647_at   | 0.01428276  | 0.475297182 | 0.636343072 | 0.778432321 |
| 243648_at   | 0.143503204 | 2.18809962  | 0.032664672 | 0.091138065 |
| 243649_at   | 0.098025053 | 2.234637216 | 0.029270446 | 0.083481479 |
| 243650_at   | -0.00262571 | -0.08338915 | 0.933826489 | 0.965564015 |
| 243651_at   | -0.03237286 | -0.61414288 | 0.541499328 | 0.706671961 |
| 243652_at   | -0.02417885 | -0.78819435 | 0.433761789 | 0.614540557 |
| 243653_at   | -0.03463502 | -1.06322601 | 0.292043845 | 0.470512744 |
| 243654_at   | 0.040654502 | 1.355685495 | 0.180404095 | 0.336643833 |
| 243655_x_at | 0.037379269 | 1.61853002  | 0.110921876 | 0.23537916  |
| 243656_at   | 0.032785677 | 0.858795718 | 0.393954589 | 0.576614106 |
| 243657_at   | 0.004843086 | 0.169433526 | 0.866039533 | 0.92762226  |
| 243658_at   | -0.02266933 | -0.65232075 | 0.516746471 | 0.686418871 |
| 243659_at   | 0.141976862 | 2.57768198  | 0.01248403  | 0.041793904 |
| 243660_at   | 0.009013901 | 0.283590533 | 0.777724303 | 0.87253651  |
| 243661_at   | 0.086665649 | 1.745719982 | 0.086103798 | 0.194360873 |
| 243662_at   | 0.035731871 | 1.319320784 | 0.192196684 | 0.351689085 |
| 243663_at   | -0.005003   | -0.15301493 | 0.878912483 | 0.935068479 |
| 243664_at   | 0.076741112 | 1.363934506 | 0.17780738  | 0.333119574 |
| 243665_s_at | -0.39672474 | -5.31667713 | 1.73E-06    | 2.52E-05    |
| 243666_at   | -0.48848234 | -4.47486699 | 3.58E-05    | 0.000311955 |
| 243667_at   | 0.099222321 | 2.65427665  | 0.010217313 | 0.03547484  |
| 243668_at   | -0.03495724 | -0.98937358 | 0.326550448 | 0.508792101 |
| 243669_s_at | -0.0546301  | -1.92760686 | 0.058758177 | 0.14453302  |
| 243670_at   | -0.02464897 | -0.60436838 | 0.547932996 | 0.71124663  |
| 243671_at   | 0.010651763 | 0.30062404  | 0.764765813 | 0.864850859 |
| 243672_at   | 0.212728448 | 3.229005939 | 0.002037774 | 0.009250605 |
| 243673_at   | 0.010045678 | 0.306765915 | 0.760109597 | 0.861854209 |
| 243674_at   | 0.06463408  | 1.871987826 | 0.066204269 | 0.158853281 |
| 243675_at   | 0.097384963 | 3.389591139 | 0.001258005 | 0.006176289 |
| 243676_at   | -0.02855903 | -0.70067802 | 0.486278466 | 0.660931731 |
| 243677_at   | 0.048900958 | 1.544102287 | 0.127950245 | 0.262021277 |
| 243678_at   | -0.0127848  | -0.46873308 | 0.64100052  | 0.781791135 |
| 243679_at   | 0.00528735  | 0.134501003 | 0.893467582 | 0.942985632 |
| 243680_at   | 0.060740957 | 1.325034603 | 0.190306192 | 0.349130345 |
| 243681_at   | -0.40961331 | -5.38641869 | 1.33E-06    | 2.02E-05    |
| 243682_at   | 0.105687317 | 2.862883845 | 0.005815632 | 0.022315807 |
| 243683_at   | 0.199397879 | 2.520310078 | 0.014471263 | 0.047142627 |
| 243684_at   | -0.00796318 | -0.24453587 | 0.807670546 | 0.891864009 |
| 243685_at   | -0.03354144 | -1.66161148 | 0.10193502  | 0.220892161 |
| 243686_at   | -0.06025669 | -2.40229213 | 0.019482776 | 0.060341248 |
| 243687_at   | -0.03950983 | -1.033097   | 0.30580581  | 0.485887403 |
| 243688_at   | -0.04765238 | -1.6947742  | 0.095429777 | 0.210029595 |
| 243689_s_at | -0.04394368 | -1.1116353  | 0.270837602 | 0.446619221 |
| 243690_at   | 0.128706146 | 3.68734898  | 0.00049763  | 0.002853485 |
| 243691_at   | 0.15509335  | 4.035964041 | 0.00015986  | 0.001090921 |
| 243692_at   | 0.003912681 | 0.159243461 | 0.874024959 | 0.932239193 |
| 243693_at   | -0.05641427 | -1.53721206 | 0.129626881 | 0.264642298 |
| 243694_at   | -0.02341483 | -0.87943365 | 0.382760406 | 0.565461063 |
| 243695_at   | -0.09848039 | -2.76637655 | 0.007571932 | 0.027776804 |
| 243696_at   | 0.00741137  | 0.213124977 | 0.831969626 | 0.907148838 |
| 243697_at   | -0.04817835 | -2.02911346 | 0.047000007 | 0.121515928 |
| 243698_at   | -0.06207329 | -2.15884403 | 0.034971293 | 0.096168904 |
| 243699_at   | -0.03678426 | -1.04962226 | 0.298203882 | 0.477321159 |
| 243700_x_at | -0.03367744 | -0.92295399 | 0.359818052 | 0.542932727 |
| 243701_at   | 0.055709342 | 1.37831986  | 0.17334743  | 0.32702589  |
| 243702_at   | 0.044527756 | 1.371425466 | 0.175474111 | 0.329993223 |
| 243703_x_at | 0.033751624 | 1.073992133 | 0.287231314 | 0.465426993 |
| 243704_at   | -0.08148582 | -1.71495234 | 0.091641219 | 0.203742381 |
| 243705_at   | 0.017958957 | 0.5337375   | 0.595543195 | 0.748397719 |
| 243706_at   | -0.17951155 | -4.95315292 | 6.54E-06    | 7.53E-05    |
| 243707_at   | 0.093507607 | 2.384410156 | 0.020364935 | 0.062497402 |
| 243708_at   | 0.155311217 | 3.08329727  | 0.003120412 | 0.013277868 |
| 243709_at   | 0.093477995 | 2.620239605 | 0.011173723 | 0.038158176 |
| 243710_at   | 0.00080947  | 0.02810906  | 0.977670733 | 0.988754733 |
| 243711_at   | -0.00295212 | -0.12844541 | 0.89823656  | 0.945478623 |
| 243712_at   | -0.0805898  | -1.92930997 | 0.058541903 | 0.144141834 |
| 243713_at   | 0.051111112 | 0.973498142 | 0.334309545 | 0.517107158 |
| 243714_at   | -0.04470948 | -1.53461311 | 0.130263825 | 0.26561506  |
| 243715_at   | 0.233165805 | 5.147645314 | 3.22E-06    | 4.20E-05    |
| 243716_at   | 0.003216272 | 0.067188658 | 0.946660365 | 0.972466902 |
| 243717_at   | -0.06990511 | -1.72863358 | 0.08914369  | 0.199541863 |
| 243718_at   | -0.18007967 | -4.20370776 | 9.10E-05    | 0.00068065  |
| 243719_at   | 0.001286609 | 0.034643972 | 0.972481445 | 0.986027967 |

|             |             |             |             |             |
|-------------|-------------|-------------|-------------|-------------|
| 243720_at   | 0.11894187  | 3.193962164 | 0.002259994 | 0.010106266 |
| 243721_at   | 0.044115055 | 1.61650598  | 0.111359402 | 0.236083411 |
| 243722_at   | -0.04114032 | -0.96107826 | 0.340464072 | 0.523336899 |
| 243723_at   | -0.01755406 | -0.61262914 | 0.54249315  | 0.707269858 |
| 243724_at   | 0.06380301  | 1.794790811 | 0.077847888 | 0.179728165 |
| 243725_at   | -0.00640851 | -0.21960703 | 0.826940839 | 0.903941299 |
| 243726_at   | 0.003883582 | 0.115420997 | 0.908506271 | 0.951623751 |
| 243727_at   | -0.09371302 | -2.46945498 | 0.016467399 | 0.052512378 |
| 243728_at   | -0.01637996 | -0.69552996 | 0.489473985 | 0.663768309 |
| 243729_at   | -0.01154594 | -0.35113297 | 0.726748627 | 0.84046279  |
| 243730_at   | -0.06786093 | -2.15799039 | 0.035040687 | 0.096336023 |
| 243731_at   | -0.05582925 | -1.33832444 | 0.185963457 | 0.343702858 |
| 243732_at   | 0.010167164 | 0.305594288 | 0.760997137 | 0.862422255 |
| 243733_at   | 0.031561436 | 1.338943665 | 0.185762958 | 0.343460124 |
| 243734_x_at | -0.01897034 | -0.83330217 | 0.408059949 | 0.590250739 |
| 243735_at   | -0.28724784 | -4.56496721 | 2.61E-05    | 0.000239337 |
| 243736_at   | 0.150802124 | 3.956079165 | 0.000208287 | 0.001363126 |
| 243737_at   | 0.001895771 | 0.052312914 | 0.958457389 | 0.978825868 |
| 243738_at   | -0.0884234  | -2.14844582 | 0.035824836 | 0.098045533 |
| 243739_at   | 0.05798438  | 1.489235901 | 0.141790912 | 0.282582807 |
| 243740_at   | -0.00419267 | -0.132948   | 0.894690251 | 0.943783829 |
| 243741_at   | -0.01226796 | -0.35853489 | 0.721232266 | 0.837056628 |
| 243742_at   | -0.18769801 | -6.43795447 | 2.47E-08    | 8.57E-07    |
| 243743_at   | -0.03794449 | -1.49011248 | 0.141560859 | 0.282284233 |
| 243744_at   | 0.032377481 | 0.871753074 | 0.386902854 | 0.569569091 |
| 243745_at   | 0.405196343 | 5.675899945 | 4.52E-07    | 8.34E-06    |
| 243746_at   | 0.013593464 | 0.531742773 | 0.596915466 | 0.749405753 |
| 243747_at   | 0.069772897 | 1.829259114 | 0.072452921 | 0.170030769 |
| 243748_at   | -0.08973958 | -1.98938927 | 0.051335094 | 0.130149081 |
| 243749_s_at | -0.04381823 | -0.89899528 | 0.372336561 | 0.555496916 |
| 243750_x_at | 0.019632387 | 0.382977713 | 0.703122827 | 0.82480656  |
| 243751_at   | 0.214345443 | 4.254831729 | 7.65E-05    | 0.000588899 |
| 243752_s_at | -0.13939215 | -3.21169678 | 0.002144833 | 0.009665916 |
| 243753_at   | -0.40261218 | -5.97740681 | 1.44E-07    | 3.35E-06    |
| 243754_at   | -0.02940572 | -0.87423682 | 0.385560208 | 0.568207374 |
| 243755_at   | -0.12677333 | -2.59068959 | 0.012069438 | 0.040682353 |
| 243756_at   | -0.04914569 | -0.89824788 | 0.372731487 | 0.555856996 |
| 243757_at   | -0.04193307 | -1.38182864 | 0.172272708 | 0.32554807  |
| 243758_at   | 0.40626413  | 3.298620488 | 0.001655936 | 0.007786942 |
| 243759_at   | 0.194014079 | 3.397301595 | 0.001228806 | 0.006058226 |
| 243760_at   | 0.157433949 | 4.51622226  | 3.10E-05    | 0.000275779 |
| 243761_at   | -0.00043148 | -0.01665064 | 0.986771917 | 0.99353002  |
| 243762_at   | -0.01305073 | -0.2843092  | 0.777176256 | 0.872311137 |
| 243763_x_at | 0.123877224 | 3.972202813 | 0.000197495 | 0.001303565 |
| 243764_at   | -0.16305975 | -5.23406656 | 2.34E-06    | 3.23E-05    |
| 243765_at   | -0.04321109 | -1.98271353 | 0.052096346 | 0.131712905 |
| 243766_s_at | 0.075260851 | 1.640278171 | 0.10630802  | 0.22788361  |
| 243767_at   | 0.034199392 | 1.341687483 | 0.184876515 | 0.342245928 |
| 243768_at   | 0.407418465 | 6.207120025 | 5.99E-08    | 1.70E-06    |
| 243769_at   | 0.005870317 | 0.181417234 | 0.856666501 | 0.921624843 |
| 243770_at   | -0.03678067 | -0.7192393  | 0.474853692 | 0.650766955 |
| 243771_at   | -0.08213564 | -2.39723148 | 0.019728889 | 0.060909334 |
| 243772_at   | -0.05207475 | -1.46028906 | 0.149554576 | 0.293611795 |
| 243773_at   | -0.05368255 | -1.86393465 | 0.067345871 | 0.160978857 |
| 243774_at   | -0.04212055 | -0.75332393 | 0.454273068 | 0.633498875 |
| 243775_at   | 0.126432605 | 4.048079382 | 0.000153537 | 0.001054055 |
| 243776_at   | -0.00923784 | -0.29025922 | 0.77264322  | 0.869852744 |
| 243777_at   | -0.00678852 | -0.19230479 | 0.848168723 | 0.916497983 |
| 243778_at   | -0.03334483 | -0.9553233  | 0.343340969 | 0.526299135 |
| 243779_at   | -0.25753722 | -4.60048103 | 2.31E-05    | 0.000215113 |
| 243780_at   | -0.0360017  | -0.88558655 | 0.37946209  | 0.562121694 |
| 243781_at   | -0.04638727 | -1.32510129 | 0.190284213 | 0.349104353 |
| 243782_at   | 0.010544975 | 0.289055925 | 0.773559314 | 0.870302912 |
| 243783_at   | 0.019445692 | 0.443254689 | 0.659214629 | 0.794066434 |
| 243784_s_at | -0.01441231 | -0.81327227 | 0.419356    | 0.601599712 |
| 243785_at   | 0.070249195 | 2.459072337 | 0.016904226 | 0.053705213 |
| 243786_at   | 0.01643137  | 0.280783975 | 0.779865643 | 0.874141135 |
| 243787_at   | 0.090516879 | 3.227311426 | 0.002048029 | 0.009289607 |
| 243788_at   | 0.101252915 | 3.353707917 | 0.001402744 | 0.006775255 |
| 243789_at   | -0.02241751 | -0.68563057 | 0.495651224 | 0.668769269 |
| 243790_at   | 0.128964782 | 2.371470448 | 0.021025393 | 0.06412795  |
| 243791_at   | 0.515396554 | 3.488488151 | 0.000928786 | 0.004793222 |
| 243792_x_at | 0.526150557 | 6.041750497 | 1.13E-07    | 2.77E-06    |
| 243793_at   | -0.02287431 | -0.6164829  | 0.539964861 | 0.705691765 |
| 243794_at   | -0.0351206  | -0.9482165  | 0.346915564 | 0.529918326 |

|             |             |             |             |             |
|-------------|-------------|-------------|-------------|-------------|
| 243795_s_at | -0.02067101 | -0.62749062 | 0.532776636 | 0.699703882 |
| 243796_at   | 0.134554161 | 2.764642466 | 0.007607544 | 0.027889126 |
| 243797_at   | 0.055680914 | 2.13365728  | 0.03707013  | 0.100664615 |
| 243798_at   | 0.026874413 | 0.826309454 | 0.411982268 | 0.594271424 |
| 243799_x_at | 0.005145396 | 0.213146696 | 0.831952765 | 0.907148838 |
| 243800_at   | -0.06461772 | -2.56085189 | 0.013039641 | 0.043302691 |
| 243801_x_at | 0.199579209 | 3.66653174  | 0.000531671 | 0.003016561 |
| 243802_at   | 0.269060838 | 2.407042837 | 0.019254243 | 0.059783062 |
| 243803_at   | -0.03703184 | -0.84265904 | 0.402847376 | 0.585163809 |
| 243804_at   | -0.19902142 | -4.44039088 | 4.04E-05    | 0.000344971 |
| 243805_at   | -0.02011928 | -0.47802427 | 0.634412427 | 0.777104553 |
| 243806_at   | 0.028755693 | 0.750679882 | 0.455850897 | 0.634788069 |
| 243807_at   | -0.05939244 | -1.6882905  | 0.096674102 | 0.212124851 |
| 243808_at   | -0.11723677 | -2.5540506  | 0.013270466 | 0.043941889 |
| 243809_at   | -0.04664279 | -1.54058852 | 0.128803094 | 0.263321344 |
| 243810_at   | -0.07719065 | -1.89335592 | 0.063254179 | 0.153289    |
| 243811_at   | -0.0339729  | -0.91699904 | 0.362903938 | 0.546027653 |
| 243812_at   | -0.01160112 | -0.38798336 | 0.699435004 | 0.822262973 |
| 243813_at   | -0.00958133 | -0.34539887 | 0.731032052 | 0.843129921 |
| 243814_at   | -0.04958309 | -1.40198059 | 0.166199036 | 0.317263255 |
| 243815_at   | 0.0019485   | 0.058813312 | 0.953301024 | 0.976035586 |
| 243816_at   | 0.307314348 | 6.290528712 | 4.35E-08    | 1.32E-06    |
| 243817_at   | 0.074648437 | 2.555335085 | 0.013226591 | 0.043816084 |
| 243818_at   | 0.021741135 | 0.781185387 | 0.437839916 | 0.61827993  |
| 243819_at   | 0.063915343 | 1.752667725 | 0.084892513 | 0.192241441 |
| 243820_at   | -0.08638553 | -1.59900061 | 0.115201992 | 0.242120781 |
| 243821_at   | 0.006213692 | 0.26908917  | 0.788806791 | 0.879508847 |
| 243822_at   | -0.05584475 | -1.17809785 | 0.24352244  | 0.414340393 |
| 243823_at   | 0.020969217 | 0.59773417  | 0.552321674 | 0.714784278 |
| 243824_at   | 0.058792974 | 1.274611778 | 0.207480692 | 0.371239794 |
| 243825_at   | 0.051934696 | 1.419848176 | 0.160953216 | 0.309656527 |
| 243826_at   | 0.264010927 | 4.787543853 | 1.19E-05    | 0.00012292  |
| 243827_at   | 0.22495276  | 4.656297955 | 1.89E-05    | 0.000182446 |
| 243828_at   | 0.006282196 | 0.271931525 | 0.786631019 | 0.878304554 |
| 243829_at   | -0.12550474 | -2.49990338 | 0.015244386 | 0.04929827  |
| 243830_at   | -0.01230916 | -0.30140426 | 0.764173833 | 0.86437845  |
| 243831_at   | -0.05909384 | -1.92979892 | 0.058479937 | 0.144033484 |
| 243832_at   | -0.01103105 | -0.30865885 | 0.758676332 | 0.86112413  |
| 243833_at   | -0.03338558 | -1.04020887 | 0.302518203 | 0.482121867 |
| 243834_at   | 0.070475158 | 2.365348161 | 0.021344502 | 0.064950477 |
| 243835_at   | 0.108337317 | 2.046386151 | 0.045215862 | 0.117911916 |
| 243836_at   | -0.10199571 | -2.58786929 | 0.012158252 | 0.040916913 |
| 243837_x_at | -0.01378403 | -0.42297352 | 0.673863688 | 0.803916394 |
| 243838_at   | -0.02772698 | -0.75028787 | 0.456085099 | 0.635035056 |
| 243839_s_at | -0.01138445 | -0.33579619 | 0.738224587 | 0.848076839 |
| 243840_at   | -0.01389027 | -0.51690089 | 0.607171948 | 0.756881868 |
| 243841_at   | -0.05599755 | -1.809711   | 0.075472718 | 0.175486536 |
| 243842_at   | -0.10436975 | -2.9058726  | 0.005161692 | 0.020233517 |
| 243843_at   | 0.001925103 | 0.05149563  | 0.959105821 | 0.979056986 |
| 243844_at   | -0.04220933 | -1.32539452 | 0.190187581 | 0.349027363 |
| 243845_at   | -0.01832164 | -0.45469169 | 0.651011985 | 0.788435105 |
| 243846_x_at | 0.226443786 | 5.524294653 | 7.98E-07    | 1.33E-05    |
| 243847_at   | 0.172293214 | 4.073296611 | 0.000141143 | 0.000984698 |
| 243848_at   | -0.09389704 | -3.84645064 | 0.000298238 | 0.001853801 |
| 243849_at   | 0.043619083 | 0.902700247 | 0.370382802 | 0.55364336  |
| 243850_at   | -0.00325476 | -0.09983568 | 0.920815743 | 0.958319102 |
| 243851_at   | 0.070371361 | 1.631056386 | 0.108245001 | 0.231187599 |
| 243852_at   | 0.096310132 | 2.704055209 | 0.008952713 | 0.031881645 |
| 243853_at   | -0.00499167 | -0.15439382 | 0.877830049 | 0.934650124 |
| 243854_at   | 0.052779038 | 1.991743817 | 0.051068886 | 0.12960651  |
| 243855_at   | -0.15988223 | -4.21063471 | 8.89E-05    | 0.000666628 |
| 243856_at   | -0.03206951 | -1.13822549 | 0.259661167 | 0.433709941 |
| 243857_at   | 0.154515641 | 1.751787444 | 0.085045197 | 0.192515825 |
| 243858_at   | -0.07503156 | -2.80602679 | 0.006798362 | 0.025416798 |
| 243859_at   | -0.00746753 | -0.21632657 | 0.829484933 | 0.905415705 |
| 243860_at   | 0.147634065 | 4.667489268 | 1.82E-05    | 0.000176202 |
| 243861_at   | -0.0370036  | -0.66485729 | 0.508751408 | 0.679836086 |
| 243862_at   | -0.05688207 | -2.02935011 | 0.046975159 | 0.121466717 |
| 243863_at   | -0.00765128 | -0.35556538 | 0.723443559 | 0.838307965 |
| 243864_at   | -0.04416463 | -1.08338441 | 0.283077979 | 0.460469215 |
| 243865_x_at | -0.05690715 | -1.79942981 | 0.077102798 | 0.178413495 |
| 243866_x_at | 0.075587905 | 3.170622188 | 0.002420423 | 0.010690141 |
| 243867_at   | -0.08162451 | -2.91170958 | 0.005078352 | 0.019960667 |
| 243868_at   | 0.26532957  | 3.631956926 | 0.000593178 | 0.003306573 |
| 243869_at   | -0.23823549 | -4.51904127 | 3.07E-05    | 0.0002734   |



|             |             |             |             |             |
|-------------|-------------|-------------|-------------|-------------|
| 243870_at   | 0.000576557 | 0.023503265 | 0.981328731 | 0.990588176 |
| 243871_at   | 0.016898773 | 0.502242247 | 0.617380312 | 0.764913531 |
| 243872_at   | -0.06325731 | -1.86906241 | 0.066617065 | 0.159622729 |
| 243873_at   | -0.14567061 | -3.60637888 | 0.000642991 | 0.00353942  |
| 243874_at   | 0.198415651 | 4.07645437  | 0.000139661 | 0.000975575 |
| 243875_at   | -0.05237088 | -1.46002724 | 0.149626287 | 0.293701724 |
| 243876_at   | 0.088871912 | 2.611547276 | 0.011430707 | 0.03889312  |
| 243877_at   | -0.03946619 | -1.0665895  | 0.290534406 | 0.468926098 |
| 243878_at   | -0.02316802 | -0.6815628  | 0.498201845 | 0.6712178   |
| 243879_at   | -0.01851207 | -0.50662728 | 0.61431847  | 0.762430466 |
| 243880_at   | -0.12928349 | -3.93054855 | 0.000226548 | 0.00146716  |
| 243881_at   | -0.16744337 | -3.66535172 | 0.000533666 | 0.003025574 |
| 243882_at   | 0.052564045 | 1.691903978 | 0.095978986 | 0.210982874 |
| 243883_at   | -0.04403956 | -1.80722939 | 0.075863512 | 0.176189748 |
| 243884_at   | 0.267976993 | 3.00004875  | 0.003960181 | 0.016265821 |
| 243885_x_at | 0.01057819  | 0.573222922 | 0.568688315 | 0.727850688 |
| 243886_at   | 0.029529067 | 0.833940594 | 0.407702985 | 0.589926565 |
| 243887_at   | -0.10947806 | -2.64106328 | 0.010579354 | 0.036483999 |
| 243888_at   | -0.06250103 | -2.76365    | 0.007627994 | 0.02794805  |
| 243889_at   | -0.04773846 | -1.01256355 | 0.315433761 | 0.496700925 |
| 243890_at   | -0.06261897 | -1.48547724 | 0.142780695 | 0.283972891 |
| 243891_at   | 0.082839337 | 2.626324035 | 0.010996984 | 0.037643782 |
| 243892_at   | 0.017119835 | 0.646052719 | 0.520768753 | 0.689687582 |
| 243893_at   | -0.09155215 | -2.79275268 | 0.007048836 | 0.026201993 |
| 243894_at   | -0.07102975 | -2.21327407 | 0.030787912 | 0.086877501 |
| 243895_x_at | 0.042552265 | 1.24571759  | 0.217828677 | 0.384198241 |
| 243896_at   | 0.080202513 | 1.239849094 | 0.219976117 | 0.386901717 |
| 243897_at   | -0.04210581 | -1.07078105 | 0.288660911 | 0.466843388 |
| 243898_at   | 0.003908426 | 0.092967814 | 0.926246432 | 0.96133974  |
| 243899_at   | 0.05541431  | 1.590285795 | 0.117154477 | 0.245239714 |
| 243900_at   | 0.211462648 | 2.575737904 | 0.012547093 | 0.041978939 |
| 243901_at   | 0.030634195 | 1.148657372 | 0.25536712  | 0.428636195 |
| 243902_at   | 0.102194709 | 3.202886701 | 0.002201335 | 0.009881684 |
| 243903_at   | -0.0300214  | -0.98886082 | 0.326799168 | 0.5089667   |
| 243904_at   | -0.25831115 | -4.51208673 | 3.15E-05    | 0.000278686 |
| 243905_at   | 0.038206433 | 1.358987115 | 0.179361327 | 0.335145766 |
| 243906_at   | 0.03612082  | 0.859474738 | 0.393583078 | 0.57634441  |
| 243907_at   | -0.0502346  | -1.19949258 | 0.23516673  | 0.404124716 |
| 243908_at   | 0.143646918 | 3.293975023 | 0.001679153 | 0.007875404 |
| 243909_x_at | -0.02931095 | -1.1415121  | 0.25830281  | 0.432198302 |
| 243910_x_at | 0.030634333 | 0.555259696 | 0.580831816 | 0.737086836 |
| 243911_at   | 0.005276569 | 0.126607316 | 0.899684874 | 0.946265565 |
| 243912_x_at | 0.067347161 | 2.101505093 | 0.039908652 | 0.106687252 |
| 243913_at   | 0.075454756 | 1.3985312   | 0.167226782 | 0.31869427  |
| 243914_at   | 0.019281348 | 0.499538951 | 0.619271295 | 0.766250249 |
| 243915_at   | 0.657374246 | 6.531519924 | 1.72E-08    | 6.62E-07    |
| 243916_x_at | 0.115969765 | 2.002078265 | 0.049914441 | 0.127283819 |
| 243917_at   | 0.009745403 | 0.317193846 | 0.752224549 | 0.857347949 |
| 243918_at   | -0.03402715 | -0.68978531 | 0.49305347  | 0.66675378  |
| 243919_at   | -0.04076672 | -0.95023072 | 0.345899988 | 0.52901794  |
| 243920_x_at | -0.08417406 | -3.03826521 | 0.003551445 | 0.014814372 |
| 243921_at   | 0.068253574 | 2.728690941 | 0.00838141  | 0.030217973 |
| 243922_at   | -0.15594511 | -3.68053112 | 0.000508542 | 0.002907108 |
| 243923_at   | -0.01775396 | -0.55370454 | 0.581888965 | 0.737882348 |
| 243924_at   | -0.11412995 | -2.72409922 | 0.008485289 | 0.030543212 |
| 243925_at   | 0.009192723 | 0.310802808 | 0.757054026 | 0.860331542 |
| 243926_at   | -0.00785704 | -0.20012076 | 0.842079415 | 0.913304837 |
| 243927_x_at | 0.000630498 | 0.034648494 | 0.972477854 | 0.986027967 |
| 243928_s_at | 0.070814192 | 2.125110263 | 0.037806951 | 0.102298737 |
| 243929_at   | -1.06175304 | -6.63829729 | 1.14E-08    | 4.93E-07    |
| 243930_x_at | 0.001635727 | 0.090707499 | 0.928034535 | 0.962371656 |
| 243931_at   | 0.004985729 | 0.119207256 | 0.90551912  | 0.94993098  |
| 243932_at   | -0.00058626 | -0.01767312 | 0.985959692 | 0.993182108 |
| 243933_at   | 0.493655692 | 6.786305466 | 6.42E-09    | 3.28E-07    |
| 243934_at   | 0.047890423 | 1.128118592 | 0.263870119 | 0.438678945 |
| 243935_at   | -0.06350687 | -1.90100723 | 0.062225281 | 0.151403105 |
| 243936_x_at | -0.02209996 | -0.76810772 | 0.445509289 | 0.625666854 |
| 243937_x_at | -0.00544119 | -0.13846556 | 0.890347491 | 0.941273834 |
| 243938_x_at | 0.080375553 | 2.610737015 | 0.011454933 | 0.038961389 |
| 243939_at   | -0.01157575 | -0.3729314  | 0.710545846 | 0.829937444 |
| 243940_at   | 0.187587287 | 3.785297851 | 0.000363566 | 0.002183054 |
| 243941_at   | -0.00590659 | -0.17249048 | 0.86364665  | 0.92603575  |
| 243942_at   | -0.03462515 | -1.30546139 | 0.196841037 | 0.357726889 |
| 243943_x_at | 0.146475608 | 2.948695695 | 0.004578606 | 0.018355493 |
| 243944_at   | 0.018533497 | 0.699167894 | 0.487214634 | 0.661620626 |

|             |             |             |             |             |
|-------------|-------------|-------------|-------------|-------------|
| 243945_at   | 0.172410266 | 2.26363332  | 0.027316549 | 0.078961981 |
| 243946_at   | 0.02372162  | 0.583164174 | 0.562021742 | 0.723149528 |
| 243947_s_at | -0.0393139  | -0.85224356 | 0.397550637 | 0.579914292 |
| 243948_at   | -0.07689471 | -2.61395405 | 0.011359018 | 0.038681594 |
| 243949_at   | -0.01584047 | -0.54839035 | 0.585508332 | 0.740804956 |
| 243950_at   | 0.147996893 | 4.574831894 | 2.52E-05    | 0.000232662 |
| 243951_at   | 0.085110963 | 2.628052003 | 0.010947257 | 0.03750516  |
| 243952_at   | 0.09833171  | 2.322667008 | 0.023691904 | 0.070688202 |
| 243953_at   | 0.064444539 | 2.131838623 | 0.037225853 | 0.101001569 |
| 243954_at   | 0.14612937  | 3.074167533 | 0.003203636 | 0.013578992 |
| 243955_at   | 0.020286817 | 0.608030643 | 0.545517927 | 0.709616299 |
| 243956_at   | 0.011715259 | 0.350285426 | 0.727381202 | 0.840828739 |
| 243957_at   | 0.0513717   | 1.259310692 | 0.212914049 | 0.378186664 |
| 243958_at   | -0.06793971 | -1.45115598 | 0.152071985 | 0.297113516 |
| 243959_at   | -0.06790883 | -2.18009666 | 0.033281992 | 0.092496659 |
| 243960_x_at | -0.00889623 | -0.35501078 | 0.723856817 | 0.838606423 |
| 243961_at   | 0.038586421 | 1.277463978 | 0.206479396 | 0.369977434 |
| 243962_at   | 0.036122713 | 1.089097045 | 0.280572317 | 0.457724035 |
| 243963_at   | 0.264651913 | 5.126849859 | 3.48E-06    | 4.47E-05    |
| 243964_at   | 0.231642809 | 3.30676876  | 0.001615942 | 0.007626961 |
| 243965_at   | 0.067982584 | 2.110532811 | 0.039093147 | 0.104883594 |
| 243966_at   | 0.138124771 | 4.166588193 | 0.000103162 | 0.000756812 |
| 243967_at   | -0.12566643 | -2.96851426 | 0.004330006 | 0.017521619 |
| 243968_x_at | -0.01720105 | -0.66306237 | 0.50989201  | 0.6807921   |
| 243969_at   | 0.322764819 | 5.327983384 | 1.66E-06    | 2.43E-05    |
| 243970_at   | 0.006447879 | 0.222381848 | 0.824790344 | 0.902758253 |
| 243971_x_at | 0.062325388 | 1.766341693 | 0.082549843 | 0.188008453 |
| 243972_at   | -0.11563743 | -2.76180418 | 0.007666163 | 0.028057994 |
| 243973_at   | 0.040879573 | 1.176365183 | 0.244208387 | 0.415239736 |
| 243974_at   | 0.093520408 | 1.898355917 | 0.062580193 | 0.152046208 |
| 243975_at   | -0.03324779 | -0.97932844 | 0.331445941 | 0.514045785 |
| 243976_at   | -0.13351682 | -3.35156985 | 0.001411847 | 0.006813221 |
| 243977_at   | 0.016048798 | 0.520471363 | 0.604697207 | 0.754880682 |
| 243978_at   | 0.066071005 | 2.063268123 | 0.043528969 | 0.11443053  |
| 243979_at   | 0.029998163 | 1.236636119 | 0.221158412 | 0.388110564 |
| 243980_at   | -0.01845533 | -0.47657115 | 0.635440849 | 0.777717231 |
| 243981_at   | 0.072348574 | 1.931730372 | 0.058235709 | 0.14358768  |
| 243982_at   | -0.08033842 | -1.89114438 | 0.063554244 | 0.153869595 |
| 243983_at   | 0.006469022 | 0.217084184 | 0.828897216 | 0.90503944  |
| 243984_at   | 0.299751711 | 4.454473399 | 3.84E-05    | 0.000331668 |
| 243985_at   | 0.145482062 | 2.693050573 | 0.009219258 | 0.032684996 |
| 243986_at   | -0.01351232 | -0.43743332 | 0.663406014 | 0.796874219 |
| 243987_at   | -0.02232721 | -0.67736661 | 0.500840473 | 0.673351857 |
| 243988_at   | 0.189479081 | 3.334390739 | 0.001487046 | 0.007111723 |
| 243989_at   | -0.05074647 | -1.95106229 | 0.055838751 | 0.139128363 |
| 243990_at   | 0.107890953 | 2.667793403 | 0.009858696 | 0.034497716 |
| 243991_at   | -0.06778296 | -2.72996103 | 0.008352884 | 0.030134573 |
| 243992_at   | 0.010427111 | 0.286143028 | 0.77577831  | 0.871671946 |
| 243993_at   | 0.131582719 | 2.050201362 | 0.044829769 | 0.117145064 |
| 243994_at   | 0.067912622 | 1.886391086 | 0.064203265 | 0.155151526 |
| 243995_at   | 0.189833097 | 3.315104826 | 0.001575971 | 0.007466425 |
| 243996_at   | -0.0795982  | -1.49276571 | 0.140866325 | 0.28121668  |
| 243997_x_at | 0.089071177 | 2.664475607 | 0.00994564  | 0.034744825 |
| 243998_at   | -0.83207875 | -6.45358217 | 2.32E-08    | 8.22E-07    |
| 243999_at   | 0.025769024 | 0.634696859 | 0.528097883 | 0.695848671 |
| 244000_at   | -0.08295386 | -2.4335938  | 0.018020703 | 0.056657142 |
| 244001_at   | -0.00197125 | -0.06202186 | 0.950756606 | 0.974752158 |
| 244002_at   | 0.124520842 | 4.377366488 | 5.02E-05    | 0.000413206 |
| 244003_at   | 0.034868382 | 1.086914186 | 0.281527927 | 0.458796897 |
| 244004_at   | 0.010275329 | 0.314487753 | 0.754268244 | 0.858716028 |
| 244005_at   | -0.02124276 | -0.4335367  | 0.666217635 | 0.79899848  |
| 244006_at   | 0.030316984 | 1.17165131  | 0.246081602 | 0.417566103 |
| 244007_at   | 0.183059544 | 3.594757084 | 0.00066692  | 0.003646597 |
| 244008_at   | 0.131482238 | 2.995984305 | 0.004006138 | 0.016416866 |
| 244009_at   | -0.02494368 | -1.06649588 | 0.290576349 | 0.468949354 |
| 244010_at   | 0.302607435 | 4.589498064 | 2.40E-05    | 0.000222434 |
| 244011_at   | 0.077932325 | 2.266410054 | 0.027135635 | 0.078576248 |
| 244012_x_at | -0.00763498 | -0.19736906 | 0.844222139 | 0.914377914 |
| 244013_at   | 0.007088201 | 0.265892436 | 0.791255853 | 0.881118418 |
| 244014_x_at | 0.229045966 | 3.869174219 | 0.000276965 | 0.001738853 |
| 244015_at   | 0.151183014 | 3.118716244 | 0.002816302 | 0.012185266 |
| 244016_at   | -0.0576927  | -1.65819164 | 0.102625985 | 0.221980473 |
| 244017_at   | -0.02846202 | -0.97298296 | 0.334563364 | 0.517345023 |
| 244018_at   | -0.08565509 | -2.53573128 | 0.013910738 | 0.045641766 |
| 244019_at   | 0.089891624 | 2.175289907 | 0.033657668 | 0.093349169 |

|             |             |             |             |             |
|-------------|-------------|-------------|-------------|-------------|
| 244020_at   | -0.00863888 | -0.30506926 | 0.761394969 | 0.862632493 |
| 244021_at   | 0.12370149  | 3.516303889 | 0.000852094 | 0.004456616 |
| 244022_at   | 0.064175603 | 1.924325481 | 0.05917679  | 0.14538668  |
| 244023_at   | 0.140699055 | 2.876255703 | 0.005604437 | 0.021644788 |
| 244024_at   | 0.158391818 | 2.615803523 | 0.011304208 | 0.038521363 |
| 244025_at   | 0.044455534 | 1.343307818 | 0.184354544 | 0.341620752 |
| 244026_at   | 0.560871579 | 4.663777335 | 1.84E-05    | 0.000178347 |
| 244027_at   | 0.009498847 | 0.366093063 | 0.715614773 | 0.833326961 |
| 244028_at   | -0.0488786  | -1.64380513 | 0.105574694 | 0.226785964 |
| 244029_at   | -0.18746165 | -3.23510543 | 0.002001261 | 0.009115231 |
| 244030_at   | -0.0105258  | -0.24811937 | 0.804909968 | 0.890069188 |
| 244031_at   | 0.011781036 | 0.588208694 | 0.558653779 | 0.720392253 |
| 244032_at   | 0.02295467  | 0.611978911 | 0.542920333 | 0.707576742 |
| 244033_at   | 0.037281361 | 1.221429403 | 0.226817512 | 0.394325602 |
| 244034_at   | -0.01792559 | -0.49745647 | 0.620729779 | 0.767175627 |
| 244035_at   | 0.04131144  | 0.734023814 | 0.465862774 | 0.64341726  |
| 244036_at   | -0.00551285 | -0.16905157 | 0.866338606 | 0.92769803  |
| 244037_at   | 0.342703594 | 6.427405303 | 2.57E-08    | 8.85E-07    |
| 244038_at   | 0.004247803 | 0.155634704 | 0.876856159 | 0.933994643 |
| 244039_x_at | -0.01597434 | -0.69260228 | 0.491296425 | 0.66542223  |
| 244040_at   | 0.313717053 | 3.692204665 | 0.000489995 | 0.002816329 |
| 244041_at   | 0.061746297 | 1.913347712 | 0.060595751 | 0.148192377 |
| 244042_x_at | -0.05162602 | -0.65294337 | 0.516347831 | 0.686236699 |
| 244043_at   | 0.137124774 | 1.969516784 | 0.053629732 | 0.134705783 |
| 244044_at   | -0.0009739  | -0.03961819 | 0.968532269 | 0.984055384 |
| 244045_at   | 0.13827959  | 3.592088086 | 0.000672534 | 0.003671745 |
| 244046_at   | -0.06343926 | -1.36552618 | 0.177309637 | 0.332368187 |
| 244047_at   | 0.245792694 | 3.862142014 | 0.000283387 | 0.001774573 |
| 244048_x_at | 0.001804608 | 0.090039625 | 0.928562953 | 0.962682924 |
| 244049_at   | 0.084467554 | 2.530946038 | 0.014082531 | 0.046102381 |
| 244050_at   | -0.0705889  | -0.95732433 | 0.342338858 | 0.525327492 |
| 244051_at   | -0.0436172  | -1.81898663 | 0.074026923 | 0.172907517 |
| 244052_at   | 0.203241977 | 4.144850845 | 0.000111011 | 0.000804361 |
| 244053_at   | 0.018067134 | 0.456024958 | 0.650058554 | 0.788037861 |
| 244054_at   | 0.019160786 | 0.645202669 | 0.521315513 | 0.690166269 |
| 244055_at   | 0.097692323 | 2.788799219 | 0.007125061 | 0.026432575 |
| 244056_at   | 0.00069824  | 0.019063136 | 0.984855536 | 0.992718743 |
| 244057_s_at | 0.00509058  | 0.142550502 | 0.887134479 | 0.939388099 |
| 244058_at   | -0.03010502 | -0.8440644  | 0.402068021 | 0.584308002 |
| 244059_at   | -0.05440159 | -1.25485758 | 0.214514961 | 0.380214262 |
| 244060_at   | 0.009562677 | 0.355014496 | 0.723854044 | 0.838606423 |
| 244061_at   | 0.095829314 | 4.438220515 | 4.07E-05    | 0.000346851 |
| 244062_at   | 0.247053684 | 4.284257582 | 6.92E-05    | 0.000539955 |
| 244063_at   | -0.0502829  | -1.6928766  | 0.095792587 | 0.210635291 |
| 244064_at   | 0.035504166 | 1.001842323 | 0.320541175 | 0.502318671 |
| 244065_at   | -0.58685019 | -7.4602886  | 4.68E-10    | 5.62E-08    |
| 244066_at   | 0.098471514 | 2.949134758 | 0.004572957 | 0.018341076 |
| 244067_x_at | -0.004892   | -0.24891916 | 0.804294186 | 0.889728839 |
| 244068_at   | 0.070229293 | 2.051915053 | 0.044657276 | 0.116817267 |
| 244069_at   | -0.26872156 | -5.81659999 | 2.66E-07    | 5.41E-06    |
| 244070_at   | 0.09537276  | 2.929860654 | 0.004827096 | 0.019164303 |
| 244071_at   | -0.46176456 | -5.65452695 | 4.90E-07    | 8.89E-06    |
| 244072_at   | -0.05823165 | -1.82379461 | 0.073286687 | 0.171564015 |
| 244073_at   | 0.000662047 | 0.023691392 | 0.981179309 | 0.990532317 |
| 244074_at   | 0.022593766 | 0.951404515 | 0.345309053 | 0.528276869 |
| 244075_at   | 0.144364352 | 2.766825237 | 0.007562743 | 0.027754484 |
| 244076_at   | -0.28695206 | -4.82242362 | 1.05E-05    | 0.000110979 |
| 244077_at   | 0.018893358 | 0.510849494 | 0.611376813 | 0.760204535 |
| 244078_at   | 0.013391737 | 0.272758779 | 0.785998092 | 0.877998118 |
| 244079_at   | 0.025096243 | 0.607510055 | 0.545860897 | 0.709959118 |
| 244080_at   | 0.047399138 | 1.230460023 | 0.22344417  | 0.390603413 |
| 244081_at   | -0.07536127 | -1.85220159 | 0.069038836 | 0.1640255   |
| 244082_at   | -0.02688383 | -1.11294665 | 0.270278605 | 0.445911308 |
| 244083_at   | -0.00733181 | -0.2935081  | 0.770171396 | 0.8684589   |
| 244084_at   | 0.304780958 | 4.021237549 | 0.000167883 | 0.001135789 |
| 244085_at   | -0.05110568 | -1.12188622 | 0.266489488 | 0.441763657 |
| 244086_at   | -0.05189102 | -1.22216136 | 0.226542713 | 0.394036414 |
| 244087_at   | 0.040682205 | 1.219925834 | 0.227382762 | 0.394889286 |
| 244088_at   | -0.08634196 | -2.35208092 | 0.022050911 | 0.066659856 |
| 244089_at   | -0.02069334 | -0.65916544 | 0.512373076 | 0.683184483 |
| 244090_at   | -0.03817354 | -1.0352081  | 0.304827385 | 0.484833819 |
| 244091_at   | -0.0337939  | -1.10101369 | 0.275395315 | 0.451801167 |
| 244092_at   | -0.05983893 | -1.305285   | 0.196900684 | 0.35779164  |
| 244093_at   | 0.01867712  | 0.580719819 | 0.563657323 | 0.724302646 |
| 244094_at   | -0.03154403 | -1.21150614 | 0.230567091 | 0.39871941  |

|             |             |             |             |             |
|-------------|-------------|-------------|-------------|-------------|
| 244095_at   | 0.06365967  | 2.301086217 | 0.024964121 | 0.073638473 |
| 244096_at   | -0.00880074 | -0.32795416 | 0.744115895 | 0.851798142 |
| 244097_at   | -0.07846202 | -2.86362732 | 0.005803699 | 0.022277669 |
| 244098_at   | -0.01722248 | -0.50342273 | 0.616555365 | 0.764145657 |
| 244099_at   | -0.17093629 | -3.962156   | 0.000204155 | 0.001339413 |
| 244100_at   | 0.132930991 | 3.986169586 | 0.000188583 | 0.001254003 |
| 244101_at   | -0.14127858 | -3.70838448 | 0.000465354 | 0.002695282 |
| 244102_at   | -0.07826397 | -1.75545335 | 0.084410848 | 0.191322123 |
| 244103_at   | 0.272476607 | 5.018604653 | 5.16E-06    | 6.18E-05    |
| 244104_at   | -0.06380458 | -1.26328519 | 0.211492688 | 0.376454964 |
| 244105_at   | -0.00528789 | -0.18894604 | 0.85078836  | 0.918122108 |
| 244106_at   | -0.10970009 | -3.44131872 | 0.001074036 | 0.00540603  |
| 244107_at   | -0.01959806 | -0.77959759 | 0.438766899 | 0.619158544 |
| 244108_at   | 0.06146873  | 1.792944912 | 0.078146035 | 0.180248895 |
| 244109_at   | -0.00674388 | -0.21150352 | 0.833228671 | 0.907684292 |
| 244110_at   | 0.042229238 | 1.070348107 | 0.288854035 | 0.467074226 |
| 244111_at   | -0.9232199  | -7.40065541 | 5.90E-10    | 6.53E-08    |
| 244112_x_at | 0.180182478 | 3.556077466 | 0.000752825 | 0.004036141 |
| 244113_at   | -0.25344265 | -3.52305125 | 0.00083442  | 0.00438161  |
| 244114_x_at | 0.124402347 | 2.584210519 | 0.012274355 | 0.041223829 |
| 244115_at   | -0.06432896 | -1.65785334 | 0.102694545 | 0.222085773 |
| 244116_at   | 0.058591382 | 1.063037651 | 0.292128532 | 0.47059829  |
| 244117_at   | -0.14336203 | -5.44479184 | 1.07E-06    | 1.69E-05    |
| 244118_at   | -0.65586409 | -4.96221832 | 6.33E-06    | 7.32E-05    |
| 244119_at   | -0.01679187 | -0.96559218 | 0.33821869  | 0.521014374 |
| 244120_at   | -0.13349883 | -3.12025885 | 0.00280371  | 0.012139041 |
| 244121_at   | -0.01871889 | -0.67832078 | 0.500239809 | 0.672847911 |
| 244122_at   | -0.04118837 | -1.11825808 | 0.268022765 | 0.443369856 |
| 244123_at   | 0.009376579 | 0.2896578   | 0.773101052 | 0.870137811 |
| 244124_at   | 0.00171917  | 0.052757276 | 0.958104845 | 0.978622369 |
| 244125_at   | -0.02643575 | -1.23070057 | 0.223354821 | 0.390494509 |
| 244126_at   | 0.084725047 | 2.693508055 | 0.009208034 | 0.032658157 |
| 244127_at   | -0.06798717 | -1.7748922  | 0.081112442 | 0.185653859 |
| 244128_x_at | -0.14849049 | -3.00015031 | 0.003959039 | 0.016262624 |
| 244129_at   | -0.00684914 | -0.1851761  | 0.853730711 | 0.919861446 |
| 244130_at   | -0.22866545 | -3.77940339 | 0.000370542 | 0.002219578 |
| 244131_at   | -0.03287162 | -0.71020176 | 0.480397483 | 0.655663169 |
| 244132_x_at | 0.256029651 | 4.907589064 | 7.71E-06    | 8.62E-05    |
| 244133_at   | -0.04412122 | -1.52533363 | 0.132558361 | 0.268968412 |
| 244134_at   | -0.07494899 | -1.82997713 | 0.072343962 | 0.169873186 |
| 244135_at   | 0.047888766 | 1.151641071 | 0.254148311 | 0.427296529 |
| 244136_at   | -0.08690957 | -2.60530401 | 0.011618593 | 0.039421359 |
| 244137_at   | -0.05761534 | -1.90765866 | 0.061342415 | 0.149621525 |
| 244138_at   | -0.03629718 | -1.2094515  | 0.231349068 | 0.399623258 |
| 244139_s_at | 0.028554449 | 0.87332996  | 0.386050094 | 0.568741785 |
| 244140_at   | 0.054255859 | 1.289907556 | 0.202153026 | 0.364597105 |
| 244141_at   | -0.04882867 | -1.02225779 | 0.31086304  | 0.491651603 |
| 244142_at   | 0.390597379 | 1.970952014 | 0.053461114 | 0.13436532  |
| 244143_at   | 0.015680443 | 0.495751132 | 0.621925263 | 0.767711163 |
| 244144_at   | 0.063591703 | 1.594391731 | 0.116231279 | 0.243762091 |
| 244145_at   | 0.307723192 | 7.002980351 | 2.77E-09    | 1.81E-07    |
| 244146_at   | 0.008022338 | 0.379547528 | 0.705654103 | 0.82653038  |
| 244147_at   | 0.021853605 | 0.748659226 | 0.457058846 | 0.63597478  |
| 244148_at   | 0.017590859 | 0.477936041 | 0.634474847 | 0.777130833 |
| 244149_at   | -0.00613342 | -0.17983624 | 0.857901914 | 0.922484052 |
| 244150_at   | 0.006751519 | 0.195675304 | 0.845541642 | 0.915221192 |
| 244151_at   | -0.06985375 | -1.71360289 | 0.091890659 | 0.204185219 |
| 244152_at   | -0.00179217 | -0.04120724 | 0.96727084  | 0.983399722 |
| 244153_at   | 0.014015328 | 0.397458965 | 0.692473966 | 0.817495895 |
| 244154_at   | 0.049991027 | 1.511281527 | 0.13609401  | 0.274254084 |
| 244155_x_at | -0.06384706 | -1.93769439 | 0.057487047 | 0.142228249 |
| 244156_at   | -0.07147739 | -1.34875252 | 0.182608798 | 0.339524583 |
| 244157_x_at | -0.00299556 | -0.07790241 | 0.938171232 | 0.967571622 |
| 244158_at   | -0.04111896 | -1.32867465 | 0.189109181 | 0.347604981 |
| 244159_at   | -0.22407707 | -5.1226983  | 3.53E-06    | 4.53E-05    |
| 244160_at   | -0.01626076 | -0.53615683 | 0.593880803 | 0.747085902 |
| 244161_at   | -0.00025394 | -0.00701439 | 0.994427207 | 0.997389153 |
| 244162_at   | 0.133577795 | 2.351129199 | 0.022102378 | 0.066788335 |
| 244163_at   | -0.11601666 | -4.22731777 | 8.40E-05    | 0.000635341 |
| 244164_at   | -0.02100751 | -0.68045268 | 0.498899163 | 0.671848347 |
| 244165_at   | 0.009034177 | 0.239833093 | 0.811297087 | 0.894211537 |
| 244166_at   | 0.136451709 | 3.506068338 | 0.000879587 | 0.004580575 |
| 244167_at   | -0.05293779 | -2.00708086 | 0.049363718 | 0.126217934 |
| 244168_s_at | 0.048144247 | 1.303734463 | 0.197425598 | 0.358395743 |
| 244169_x_at | -0.01205723 | -0.56250743 | 0.575917231 | 0.73326001  |

|             |             |             |             |             |
|-------------|-------------|-------------|-------------|-------------|
| 244170_at   | -0.87769174 | -5.90792031 | 1.88E-07    | 4.12E-06    |
| 244171_at   | -0.03856685 | -1.12870243 | 0.26362568  | 0.438480048 |
| 244172_at   | -0.00988395 | -0.30829354 | 0.758952869 | 0.861241155 |
| 244173_at   | -0.02171595 | -0.93660725 | 0.352806883 | 0.535986309 |
| 244174_at   | -0.03393263 | -0.80414223 | 0.424566965 | 0.606005359 |
| 244175_at   | 0.018028365 | 0.454740614 | 0.65097699  | 0.788435105 |
| 244176_at   | -0.04367793 | -1.15495349 | 0.252800093 | 0.425750528 |
| 244177_at   | -0.06764286 | -1.74385073 | 0.086432121 | 0.19492478  |
| 244178_at   | -0.04220937 | -1.49477649 | 0.140341756 | 0.280520317 |
| 244179_x_at | 0.054065339 | 1.630143737 | 0.108438246 | 0.231449549 |
| 244180_at   | -0.04759965 | -0.76800396 | 0.445570447 | 0.625716714 |
| 244181_at   | 0.327999903 | 3.632076235 | 0.000592955 | 0.003306573 |
| 244182_at   | -0.06613662 | -1.66176015 | 0.101905067 | 0.22085938  |
| 244183_x_at | -0.14676377 | -5.21673617 | 2.50E-06    | 3.40E-05    |
| 244184_at   | -0.28208278 | -6.12922542 | 8.08E-08    | 2.13E-06    |
| 244185_at   | 0.103368548 | 2.801112973 | 0.006890111 | 0.025706054 |
| 244186_at   | -0.00719132 | -0.1814482  | 0.856642309 | 0.921624843 |
| 244187_at   | -0.17189479 | -4.45021803 | 3.90E-05    | 0.000335703 |
| 244188_at   | -0.13507549 | -3.19549716 | 0.002249802 | 0.010072945 |
| 244189_at   | -0.06073701 | -1.31562727 | 0.193426249 | 0.353357822 |
| 244190_at   | -0.03118525 | -1.43629047 | 0.156240071 | 0.302923138 |
| 244191_at   | 0.031674073 | 0.865137841 | 0.390493118 | 0.573359565 |
| 244192_x_at | -0.05125213 | -2.15030015 | 0.0356713   | 0.097695518 |
| 244193_at   | 0.050211383 | 1.456714878 | 0.15053584  | 0.294973156 |
| 244194_at   | -0.0536912  | -1.41803476 | 0.161479704 | 0.310308765 |
| 244195_at   | -0.01050939 | -0.29295248 | 0.770593955 | 0.868746406 |
| 244196_at   | 0.055232761 | 1.555756719 | 0.125153727 | 0.257818408 |
| 244197_x_at | 0.432145459 | 6.581549979 | 1.42E-08    | 5.79E-07    |
| 244198_at   | 0.046156316 | 1.688964722 | 0.096544091 | 0.211922814 |
| 244199_at   | -0.01590237 | -0.44701154 | 0.656515507 | 0.792164773 |
| 244200_at   | 0.081681241 | 2.71964826  | 0.008587108 | 0.030835212 |
| 244201_at   | 0.032017778 | 0.859389942 | 0.39362946  | 0.576355136 |
| 244202_at   | -0.03639845 | -1.1575052  | 0.251764992 | 0.424638268 |
| 244203_at   | -0.00452033 | -0.17811861 | 0.859244508 | 0.923331463 |
| 244204_at   | -0.17212575 | -3.59950923 | 0.000657035 | 0.003601201 |
| 244205_at   | -0.02428555 | -0.78126238 | 0.437794994 | 0.618255566 |
| 244206_at   | -0.03233849 | -0.8391131  | 0.404817931 | 0.587158763 |
| 244207_at   | 0.052023983 | 1.384116265 | 0.171574778 | 0.324558536 |
| 244208_at   | 0.001366322 | 0.040847569 | 0.967556351 | 0.983468294 |
| 244209_at   | -0.00449573 | -0.16349187 | 0.87069405  | 0.930200045 |
| 244210_at   | 0.000714043 | 0.020138555 | 0.984001298 | 0.992170969 |
| 244211_at   | 0.007625768 | 0.253164969 | 0.801027288 | 0.887576525 |
| 244212_at   | 0.071053516 | 2.114052039 | 0.038779197 | 0.104266626 |
| 244213_at   | -0.01995054 | -0.73950938 | 0.462551661 | 0.640557999 |
| 244214_at   | -0.01064005 | -0.28287768 | 0.778268029 | 0.872919609 |
| 244215_at   | 0.018580914 | 0.545024954 | 0.587805958 | 0.74262117  |
| 244216_at   | 0.033717518 | 0.603559163 | 0.548467365 | 0.711712885 |
| 244217_at   | -0.44531853 | -4.41585079 | 4.40E-05    | 0.000369311 |
| 244218_at   | -0.07453016 | -2.00106177 | 0.050026988 | 0.127497988 |
| 244219_at   | -0.00634905 | -0.14215927 | 0.887442124 | 0.939513524 |
| 244220_at   | -0.13176529 | -3.25068918 | 0.001910751 | 0.008778296 |
| 244221_at   | -0.04615432 | -1.07399612 | 0.287229541 | 0.465426993 |
| 244222_at   | 0.081929432 | 2.29285851  | 0.02546491  | 0.074794804 |
| 244223_at   | -0.04920015 | -1.20797275 | 0.231913061 | 0.400318972 |
| 244224_x_at | 0.038746628 | 1.050669668 | 0.297726453 | 0.476792499 |
| 244225_x_at | 0.026262481 | 0.877487282 | 0.383807516 | 0.566502378 |
| 244226_s_at | 0.034710789 | 1.068669563 | 0.289603635 | 0.467846219 |
| 244227_at   | -0.29787367 | -4.46974346 | 3.65E-05    | 0.000316584 |
| 244228_at   | -0.02193154 | -0.85300053 | 0.39713415  | 0.579474336 |
| 244229_at   | -0.03390274 | -0.98181237 | 0.330230888 | 0.51278705  |
| 244230_at   | 0.029890481 | 1.041684541 | 0.301839076 | 0.481451585 |
| 244231_at   | 0.045571697 | 1.222374007 | 0.226462925 | 0.393985015 |
| 244232_at   | -0.05318909 | -1.43403175 | 0.156881092 | 0.30386278  |
| 244233_at   | 0.014195667 | 0.477658533 | 0.634671201 | 0.777328729 |
| 244234_at   | -0.03356542 | -1.07575403 | 0.28644899  | 0.464428741 |
| 244235_at   | -0.14009233 | -4.19983733 | 9.22E-05    | 0.00068734  |
| 244236_at   | 0.030608682 | 1.041012162 | 0.302148385 | 0.481807387 |
| 244237_at   | -0.04190542 | -1.31701542 | 0.19296344  | 0.352709885 |
| 244238_at   | 0.034273424 | 0.805369604 | 0.42386419  | 0.60543125  |
| 244239_at   | 0.093282068 | 2.066681758 | 0.043194576 | 0.113729939 |
| 244240_at   | -0.04468241 | -1.36159395 | 0.178541249 | 0.334126795 |
| 244241_x_at | -0.25739831 | -6.71460181 | 8.47E-09    | 3.96E-07    |
| 244242_at   | -0.00071652 | -0.01949861 | 0.984509625 | 0.992526769 |
| 244243_at   | -0.02051514 | -0.54652197 | 0.586783383 | 0.741748634 |
| 244244_at   | -0.01309536 | -0.50070921 | 0.618452372 | 0.765726452 |

|             |             |             |             |             |
|-------------|-------------|-------------|-------------|-------------|
| 244245_at   | 0.037065307 | 0.810419968 | 0.42097979  | 0.602910618 |
| 244246_at   | 0.055212628 | 1.874694504 | 0.065824266 | 0.158094266 |
| 244247_at   | -0.04741889 | -1.51852816 | 0.134261469 | 0.271524212 |
| 244248_at   | 0.095864961 | 2.779314986 | 0.007311028 | 0.026988063 |
| 244249_at   | 0.029601567 | 1.095356918 | 0.277844417 | 0.454479553 |
| 244250_at   | -0.10045827 | -3.58747782 | 0.000682338 | 0.003716642 |
| 244251_at   | 0.032227242 | 1.222130787 | 0.226554186 | 0.394036414 |
| 244252_at   | 0.062619929 | 1.948912768 | 0.056101037 | 0.139579554 |
| 244253_at   | -0.00776252 | -0.24135166 | 0.810125587 | 0.893352366 |
| 244254_at   | -0.05015154 | -1.55161575 | 0.126141717 | 0.259388124 |
| 244255_at   | 0.02793999  | 0.85192315  | 0.397727007 | 0.580053508 |
| 244256_at   | -0.14626678 | -4.69712685 | 1.64E-05    | 0.00016153  |
| 244257_at   | 0.038938639 | 1.217326493 | 0.228362384 | 0.395856475 |
| 244258_at   | 0.017208243 | 0.467382869 | 0.641960351 | 0.782439512 |
| 244259_s_at | -0.11656782 | -3.44931692 | 0.001047977 | 0.005299409 |
| 244260_at   | -0.06106552 | -0.7342986  | 0.465696591 | 0.643287137 |
| 244261_at   | 0.047064473 | 1.317353616 | 0.192850815 | 0.3525252   |
| 244262_x_at | 0.090465788 | 3.02612262  | 0.003676841 | 0.015264781 |
| 244263_at   | 0.029176995 | 0.803296401 | 0.425051677 | 0.606447448 |
| 244264_at   | 0.054076836 | 1.672938534 | 0.099673512 | 0.217087075 |
| 244265_at   | 0.156171994 | 3.640423818 | 0.000577516 | 0.003236815 |
| 244266_at   | 0.054529886 | 1.744369825 | 0.086340841 | 0.194768064 |
| 244267_at   | 0.128023004 | 2.633603265 | 0.010788888 | 0.037053483 |
| 244268_x_at | 0.039689649 | 1.407066918 | 0.164692463 | 0.315046679 |
| 244269_at   | -0.03750006 | -1.29231812 | 0.201322817 | 0.363491973 |
| 244270_at   | 0.016186266 | 0.530915966 | 0.5974847   | 0.749825515 |
| 244271_at   | 0.134239869 | 3.345868524 | 0.001436396 | 0.006913139 |
| 244272_s_at | 0.028207834 | 0.860358402 | 0.393099926 | 0.575862787 |
| 244273_at   | -0.05631111 | -1.52237745 | 0.133296041 | 0.270146321 |
| 244274_at   | 0.016720703 | 0.483218437 | 0.630742261 | 0.774443992 |
| 244275_at   | -0.0734617  | -1.99371124 | 0.050847357 | 0.129183679 |
| 244276_at   | 0.04034456  | 0.838123256 | 0.405369063 | 0.587729251 |
| 244277_at   | -0.03840472 | -1.51605207 | 0.134885411 | 0.272465482 |
| 244278_at   | -0.03891998 | -0.99688904 | 0.32291946  | 0.504894924 |
| 244279_at   | -0.02695069 | -0.63341376 | 0.528929377 | 0.696429653 |
| 244280_at   | -0.02668977 | -0.69199873 | 0.491672589 | 0.665732461 |
| 244281_at   | 0.135390152 | 2.137216507 | 0.036767014 | 0.100066462 |
| 244282_at   | 0.003393773 | 0.091070459 | 0.927747378 | 0.962239368 |
| 244283_x_at | 0.00631269  | 0.294638184 | 0.769312159 | 0.867906071 |
| 244284_at   | -0.03249539 | -0.96973698 | 0.336165532 | 0.518965499 |
| 244285_at   | -0.00325942 | -0.09312761 | 0.926120037 | 0.961287519 |
| 244286_at   | 0.357011009 | 3.605757941 | 0.000644249 | 0.003545004 |
| 244287_at   | -0.03421342 | -1.13448224 | 0.261214428 | 0.435539293 |
| 244288_s_at | -0.12547996 | -2.79637303 | 0.006979692 | 0.025983874 |
| 244289_at   | 0.023052372 | 0.50437877  | 0.615887631 | 0.763720485 |
| 244290_at   | 0.170323728 | 4.189108375 | 9.56E-05    | 0.000708997 |
| 244291_x_at | 0.055344101 | 1.648021397 | 0.104703456 | 0.225459255 |
| 244292_at   | 0.042106629 | 0.910494222 | 0.366294129 | 0.549557026 |
| 244293_at   | -0.10451359 | -2.00271945 | 0.049843561 | 0.127168375 |
| 244294_at   | -0.38398357 | -6.43923807 | 2.45E-08    | 8.56E-07    |
| 244295_at   | -0.03398258 | -1.21668581 | 0.228604312 | 0.396152924 |
| 244296_at   | -0.02476721 | -0.80232094 | 0.425611088 | 0.607072759 |
| 244297_at   | -0.30561423 | -2.67129866 | 0.009767594 | 0.034237907 |
| 244298_at   | 0.068336344 | 1.886007113 | 0.064255937 | 0.155228451 |
| 244299_at   | 0.038776671 | 1.308769621 | 0.195724844 | 0.356289779 |
| 244300_at   | 0.019368819 | 0.401170663 | 0.689754455 | 0.815235662 |
| 244301_at   | -0.04518466 | -1.75036115 | 0.08529307  | 0.192969417 |
| 244302_at   | 0.024956965 | 0.795990566 | 0.429252168 | 0.610308349 |
| 244303_at   | -0.04728075 | -1.95023854 | 0.055939141 | 0.139283432 |
| 244304_at   | -0.04587091 | -1.23419887 | 0.22205837  | 0.389033033 |
| 244305_at   | -0.02472161 | -0.50011596 | 0.618867453 | 0.766034017 |
| 244306_at   | 0.031875066 | 1.041873181 | 0.301752335 | 0.481364769 |
| 244307_s_at | -0.01135907 | -0.37033185 | 0.712471233 | 0.831153431 |
| 244308_at   | -0.02540163 | -0.75960915 | 0.450535086 | 0.629996373 |
| 244309_at   | -0.00388506 | -0.16637071 | 0.868438265 | 0.928706141 |
| 244310_at   | 0.11138393  | 2.09104059  | 0.040872437 | 0.108795174 |
| 244311_at   | 0.028853998 | 1.071857333 | 0.288181194 | 0.466323688 |
| 244312_at   | 0.009876864 | 0.285783791 | 0.776052102 | 0.871790683 |
| 244313_at   | 0.157345805 | 3.004597278 | 0.003909332 | 0.016086535 |
| 244314_at   | -0.00850648 | -0.25703195 | 0.798054979 | 0.885622455 |
| 244315_at   | -0.02770723 | -1.0059017  | 0.318600869 | 0.499944175 |
| 244316_at   | 0.030878692 | 1.06712987  | 0.290292408 | 0.468569355 |
| 244317_at   | -0.0840269  | -1.66130336 | 0.101997117 | 0.220994578 |
| 244318_at   | 0.027953957 | 1.324915564 | 0.190345434 | 0.34917367  |
| 244319_at   | 0.049032843 | 1.277071101 | 0.206617106 | 0.370135148 |

|             |             |             |             |             |
|-------------|-------------|-------------|-------------|-------------|
| 244320_at   | 0.047914749 | 1.584080217 | 0.118560965 | 0.247419064 |
| 244321_at   | -0.05436726 | -1.23295668 | 0.222518086 | 0.3896246   |
| 244322_at   | -0.05680005 | -1.53970897 | 0.129017283 | 0.263664856 |
| 244323_at   | 0.031273051 | 0.853861371 | 0.396660844 | 0.579135826 |
| 244324_at   | 0.139802915 | 3.69592547  | 0.00048422  | 0.002788038 |
| 244325_at   | -0.00351128 | -0.11244421 | 0.910855725 | 0.952907881 |
| 244326_at   | -0.03454031 | -0.87208061 | 0.386725629 | 0.56943667  |
| 244327_at   | 0.066491849 | 1.593615704 | 0.116405314 | 0.24403726  |
| 244328_x_at | -0.01795737 | -0.54586706 | 0.587230635 | 0.742083117 |
| 244329_at   | -0.02544015 | -0.6130952  | 0.542187067 | 0.707115221 |
| 244330_at   | -0.00151063 | -0.04088909 | 0.967523394 | 0.983468294 |
| 244331_at   | -0.03355224 | -1.02547194 | 0.309357548 | 0.489928401 |
| 244332_at   | 0.019095251 | 0.621371666 | 0.53676628  | 0.702999606 |
| 244333_at   | 0.023057384 | 0.685237447 | 0.495897412 | 0.669000457 |
| 244334_at   | -0.09222899 | -1.78669697 | 0.079162275 | 0.182113573 |
| 244335_at   | -0.0063209  | -0.20604803 | 0.83746799  | 0.910327603 |
| 244336_at   | -0.03884146 | -0.9713212  | 0.335382955 | 0.518217916 |
| 244337_at   | -0.02429839 | -0.90765952 | 0.367777842 | 0.550958889 |
| 244338_at   | 0.068743124 | 2.72737452  | 0.008411072 | 0.030317576 |
| 244339_at   | 0.013699765 | 0.278041234 | 0.781959948 | 0.875346697 |
| 244340_x_at | 0.056544972 | 1.793420908 | 0.078069062 | 0.18008994  |
| 244341_at   | 0.130849223 | 1.683094494 | 0.097680879 | 0.213736187 |
| 244342_at   | 0.011569498 | 0.404072571 | 0.687631124 | 0.813717851 |
| 244343_at   | -0.01811021 | -0.49324403 | 0.623684667 | 0.768993714 |
| 244344_at   | -0.00855489 | -0.22983449 | 0.819021228 | 0.899154898 |
| 244345_at   | 0.442499271 | 5.318803172 | 1.71E-06    | 2.50E-05    |
| 244346_at   | -0.02685527 | -0.85773867 | 0.394533365 | 0.577168089 |
| 244347_at   | 0.064381355 | 2.047163979 | 0.045136914 | 0.117789266 |
| 244348_at   | 0.11385605  | 2.93055803  | 0.004817676 | 0.019132116 |
| 244349_at   | 0.036014403 | 0.852364814 | 0.397483904 | 0.579852155 |
| 244350_at   | 0.147148103 | 2.494700328 | 0.015447385 | 0.049846536 |
| 244351_at   | -0.05226981 | -1.84243421 | 0.070475395 | 0.166473908 |
| 244352_at   | 0.07457632  | 2.028264469 | 0.047089247 | 0.121690334 |
| 244353_s_at | 0.041735111 | 1.061212043 | 0.292950235 | 0.471463158 |
| 244354_at   | -0.64172686 | -7.10526587 | 1.86E-09    | 1.39E-07    |
| 244355_at   | -0.12587742 | -2.23191954 | 0.029459751 | 0.083887556 |
| 244356_at   | 0.067802101 | 1.745506021 | 0.086141326 | 0.194425946 |
| 244357_at   | 0.013524779 | 0.309169566 | 0.75828978  | 0.860991511 |
| 244358_at   | 0.190702177 | 4.894377146 | 8.09E-06    | 8.95E-05    |
| 244359_s_at | 0.149839314 | 2.29637044  | 0.025250072 | 0.074305406 |
| 244360_at   | -0.04382067 | -1.07762061 | 0.2856218   | 0.46340701  |
| 244361_at   | 0.020894731 | 0.67685468  | 0.501162902 | 0.67353194  |
| 244362_at   | 0.011422439 | 0.414589839 | 0.679956878 | 0.808186824 |
| 244363_at   | -0.06227525 | -1.64794552 | 0.104719082 | 0.225472487 |
| 244364_at   | -0.05646909 | -1.49151857 | 0.141192454 | 0.281716734 |
| 244365_at   | 0.033082936 | 1.109664026 | 0.271679442 | 0.447611061 |
| 244366_at   | -0.02711883 | -0.70853129 | 0.481426128 | 0.656733304 |
| 244367_at   | 0.021560855 | 0.616767693 | 0.539778263 | 0.705497167 |
| 244368_x_at | 0.024966671 | 0.733311468 | 0.466293738 | 0.643694201 |
| 244369_at   | 0.023422384 | 0.731800352 | 0.467208704 | 0.644451998 |
| 244370_at   | -0.61688893 | -5.02935274 | 4.96E-06    | 5.99E-05    |
| 244371_at   | 0.031271708 | 1.224110847 | 0.225812006 | 0.393360699 |
| 244372_at   | -0.04684423 | -1.30817048 | 0.195926641 | 0.356543565 |
| 244373_at   | 0.085809586 | 2.860347387 | 0.005856513 | 0.022447624 |
| 244374_at   | -0.02553692 | -0.68799326 | 0.494173032 | 0.667661693 |
| 244375_at   | -0.07918689 | -1.9254839  | 0.059028719 | 0.145098324 |
| 244376_at   | -0.02664034 | -0.96884105 | 0.336608639 | 0.519375567 |
| 244377_at   | 0.064537637 | 1.716364768 | 0.091380736 | 0.20329656  |
| 244378_at   | -0.08998621 | -2.40171039 | 0.019510927 | 0.06040332  |
| 244379_at   | -0.00366956 | -0.09853549 | 0.921843572 | 0.959098448 |
| 244380_at   | -0.01806468 | -0.31728284 | 0.75215737  | 0.857341646 |
| 244381_at   | -0.0120575  | -0.225819   | 0.822128408 | 0.901149843 |
| 244382_at   | -0.07274069 | -1.87081971 | 0.066368838 | 0.159171243 |
| 244383_at   | 0.418705142 | 5.683058092 | 4.40E-07    | 8.18E-06    |
| 244384_at   | -0.00400735 | -0.11376766 | 0.909811079 | 0.952410858 |
| 244385_at   | -0.10075709 | -2.45902241 | 0.016906351 | 0.053705213 |
| 244386_at   | 0.038988781 | 1.466365212 | 0.147897916 | 0.291320515 |
| 244387_at   | -0.12830311 | -2.22026257 | 0.030284048 | 0.085743089 |
| 244388_at   | 0.020696657 | 0.612987095 | 0.542258055 | 0.707157043 |
| 244389_at   | -0.06052235 | -2.47511525 | 0.016233562 | 0.051926021 |
| 244390_at   | -0.02225669 | -0.68030553 | 0.49899164  | 0.671856547 |
| 244391_at   | -0.01576238 | -0.4233592  | 0.673583901 | 0.803775711 |
| 244392_at   | 0.002256512 | 0.05836923  | 0.953653226 | 0.976172556 |
| 244393_x_at | -0.06726435 | -2.40151663 | 0.019520311 | 0.060411449 |
| 244394_at   | -0.04053897 | -1.15949713 | 0.250959073 | 0.423735801 |

|             |             |             |             |             |
|-------------|-------------|-------------|-------------|-------------|
| 244395_at   | -0.04135231 | -0.90834042 | 0.367421106 | 0.550589594 |
| 244396_at   | 0.079204176 | 2.224795707 | 0.029961112 | 0.08504427  |
| 244397_at   | -0.11700964 | -3.45630061 | 0.001025714 | 0.005208047 |
| 244398_x_at | 0.010001713 | 0.345876946 | 0.730674596 | 0.842956944 |
| 244399_at   | 0.03882976  | 1.557188467 | 0.124813571 | 0.257212529 |
| 244400_at   | 0.037542847 | 1.349979008 | 0.182217286 | 0.339022312 |
| 244401_at   | 0.183058747 | 3.101068616 | 0.002964179 | 0.012711102 |
| 244402_at   | -0.03449451 | -1.42855752 | 0.158443158 | 0.3061321   |
| 244403_at   | 0.694630463 | 6.716992608 | 8.39E-09    | 3.93E-07    |
| 244404_at   | 0.088162373 | 2.822233199 | 0.006503686 | 0.024487174 |
| 244405_s_at | -0.07771546 | -2.01345361 | 0.048669737 | 0.124850643 |
| 244406_at   | 0.149024983 | 4.038495212 | 0.000158518 | 0.001082926 |
| 244407_at   | 0.082388888 | 1.901318286 | 0.062183755 | 0.151326783 |
| 244408_at   | -0.06032008 | -1.2390321  | 0.220276308 | 0.387292527 |
| 244409_at   | -0.0531628  | -1.22462407 | 0.225619927 | 0.393069263 |
| 244410_at   | 0.018928999 | 0.642039099 | 0.523353011 | 0.692084648 |
| 244411_at   | 0.022257234 | 0.746990463 | 0.458057824 | 0.63669083  |
| 244412_at   | -0.00842366 | -0.39433222 | 0.694768053 | 0.819125065 |
| 244413_at   | -0.0095299  | -0.34428226 | 0.731867178 | 0.843548883 |
| 244414_at   | 0.51493798  | 5.90044947  | 1.93E-07    | 4.21E-06    |
| 244415_at   | -0.12852657 | -2.96712282 | 0.004347042 | 0.017580128 |
| 244416_at   | -0.01912681 | -0.5465379  | 0.58677251  | 0.741748634 |
| 244417_at   | -0.02518724 | -0.68637459 | 0.495185472 | 0.668423363 |
| 244418_at   | -0.30369354 | -4.32500597 | 6.01E-05    | 0.000480154 |
| 244419_at   | -0.00284762 | -0.09449256 | 0.925040445 | 0.960702427 |
| 244420_at   | 0.164165582 | 3.52608098  | 0.000826597 | 0.004348198 |
| 244421_at   | 0.018826417 | 0.679536952 | 0.49947478  | 0.672223534 |
| 244422_at   | 0.048199274 | 1.13734161  | 0.260027341 | 0.434078214 |
| 244423_at   | 0.040173101 | 1.202320833 | 0.234077923 | 0.402950873 |
| 244424_at   | -0.00212099 | -0.05967129 | 0.952620588 | 0.975747583 |
| 244425_at   | 0.020598679 | 0.695521295 | 0.489479373 | 0.663768309 |
| 244426_at   | 0.020041723 | 0.692609277 | 0.491292064 | 0.66542223  |
| 244427_at   | -0.01987481 | -0.70341489 | 0.484584349 | 0.659431329 |
| 244428_at   | -0.03378461 | -1.08665787 | 0.281640286 | 0.458851541 |
| 244429_at   | 0.066348866 | 2.013064669 | 0.04871185  | 0.124929991 |
| 244430_at   | 0.025246209 | 0.795872295 | 0.429320371 | 0.610330651 |
| 244431_at   | 0.031612224 | 0.840367456 | 0.404120183 | 0.586388348 |
| 244432_at   | -0.09663272 | -1.78224106 | 0.079893754 | 0.183514361 |
| 244433_at   | 0.297005    | 4.184881845 | 9.70E-05    | 0.000717428 |
| 244434_at   | 0.010660096 | 0.394257759 | 0.694822717 | 0.819167903 |
| 244435_at   | -0.1874807  | -4.99707238 | 5.58E-06    | 6.59E-05    |
| 244436_at   | -0.06340266 | -1.3302226  | 0.188601872 | 0.346843669 |
| 244437_at   | -0.04611707 | -1.3887169  | 0.170177748 | 0.322667002 |
| 244438_at   | 0.001625954 | 0.047493317 | 0.962281642 | 0.980826308 |
| 244439_at   | -0.26062335 | -4.31931594 | 6.13E-05    | 0.000487795 |
| 244440_at   | 0.002667034 | 0.08812555  | 0.930077534 | 0.963560239 |
| 244441_at   | -0.04304885 | -1.52989833 | 0.131425667 | 0.267398521 |
| 244442_at   | -0.03356173 | -0.78086762 | 0.438025341 | 0.618483146 |
| 244443_at   | 0.181658802 | 2.682205731 | 0.00948902  | 0.033445052 |
| 244444_at   | 0.039913063 | 0.764749069 | 0.447491564 | 0.627133532 |
| 244445_at   | -0.05232026 | -1.30293712 | 0.197695935 | 0.358667968 |
| 244446_at   | -0.06443639 | -1.52628444 | 0.132321787 | 0.268646951 |
| 244447_at   | 0.118542073 | 2.074237819 | 0.042462309 | 0.112145463 |
| 244448_at   | 0.077170198 | 2.214929782 | 0.030667874 | 0.086613176 |
| 244449_at   | 0.019209288 | 0.435139715 | 0.665060386 | 0.798229638 |
| 244450_at   | 0.103844553 | 1.815847016 | 0.074513674 | 0.17375379  |
| 244451_x_at | -0.02287849 | -0.90763475 | 0.367790824 | 0.550958889 |
| 244452_at   | -0.01710484 | -0.3894534  | 0.698353359 | 0.821445146 |
| 244453_at   | 0.005439579 | 0.183293927 | 0.855200489 | 0.920801297 |
| 244454_at   | -0.01701141 | -0.57420208 | 0.568029975 | 0.727445574 |
| 244455_at   | -0.13109127 | -2.77123471 | 0.00747298  | 0.027476956 |
| 244456_at   | 0.065491286 | 2.182694567 | 0.033080485 | 0.092119947 |
| 244457_at   | 0.36212703  | 3.883833109 | 0.000264024 | 0.001668044 |
| 244458_at   | 0.009704476 | 0.317264072 | 0.752171537 | 0.857341646 |
| 244459_at   | 0.152114942 | 3.207391852 | 0.002172269 | 0.009772723 |
| 244460_at   | 0.015864973 | 0.496278747 | 0.621555282 | 0.767598854 |
| 244461_at   | 0.040252772 | 0.975710189 | 0.333221157 | 0.515930017 |
| 244462_at   | -0.03438085 | -0.7408748  | 0.461729588 | 0.63994352  |
| 244463_at   | -0.89070442 | -7.32331999 | 7.97E-10    | 8.13E-08    |
| 244464_at   | 0.171610502 | 3.977126946 | 0.000194308 | 0.001285565 |
| 244465_at   | -0.01454661 | -0.35617362 | 0.722990431 | 0.838099194 |
| 244466_at   | 0.033166773 | 1.254396333 | 0.214681288 | 0.380359954 |
| 244467_at   | 0.043022807 | 1.398595957 | 0.167207442 | 0.318684593 |
| 244468_at   | -0.01007157 | -0.4001836  | 0.690477261 | 0.815780378 |
| 244469_at   | -0.01327989 | -0.34322694 | 0.732656764 | 0.844028391 |



|             |              |             |             |             |
|-------------|--------------|-------------|-------------|-------------|
| 244470_at   | -0.01308345  | -0.36070929 | 0.719614581 | 0.835838525 |
| 244471_x_at | -0.02718713  | -0.78417422 | 0.436098118 | 0.616633275 |
| 244472_at   | 0.0234446372 | 0.760613752 | 0.449939281 | 0.629379855 |
| 244473_at   | 0.172689539  | 5.236834136 | 2.32E-06    | 3.20E-05    |
| 244474_at   | 0.03025734   | 0.876720395 | 0.38422058  | 0.566836314 |
| 244475_at   | -0.05866272  | -1.58184123 | 0.119071751 | 0.248039266 |
| 244476_at   | 0.020162463  | 0.433687652 | 0.666108625 | 0.79892992  |
| 244477_at   | -0.08068773  | -1.43305149 | 0.157159924 | 0.304350088 |
| 244478_at   | 0.096405072  | 2.864035347 | 0.005797159 | 0.022260215 |
| 244479_at   | -0.01744768  | -0.44695574 | 0.656555561 | 0.792191716 |
| 244480_at   | 0.265980203  | 6.02518202  | 1.20E-07    | 2.92E-06    |
| 244481_at   | -0.01396862  | -0.42505617 | 0.672353411 | 0.80282184  |
| 244482_at   | 0.155435769  | 3.403842099 | 0.001204543 | 0.005955025 |
| 244483_at   | 0.015221974  | 0.763172764 | 0.44842367  | 0.627934353 |
| 244484_at   | 0.071715653  | 1.659486208 | 0.102363975 | 0.2215746   |
| 244485_at   | 0.013308178  | 0.481425652 | 0.632007982 | 0.775424491 |
| 244486_at   | -0.06953038  | -1.79365409 | 0.078031376 | 0.180049474 |
| 244487_at   | -0.00780527  | -0.24399497 | 0.808087442 | 0.892192098 |
| 244488_at   | -0.00720557  | -0.16711984 | 0.867851453 | 0.928444781 |
| 244489_at   | 0.177881424  | 3.402652819 | 0.001208921 | 0.005974025 |
| 244490_at   | 0.087884291  | 2.351895735 | 0.022060917 | 0.066681084 |
| 244491_at   | -0.00146993  | -0.03103242 | 0.975349196 | 0.987531111 |
| 244492_at   | -0.05565444  | -1.57045711 | 0.121696263 | 0.252201498 |
| 244493_at   | -0.15013921  | -4.2954836  | 6.65E-05    | 0.000522804 |
| 244494_at   | -0.01223425  | -0.3317634  | 0.741252266 | 0.849839054 |
| 244495_x_at | 0.128720203  | 2.942417749 | 0.004660079 | 0.018613661 |
| 244496_at   | -0.00036709  | -0.00920538 | 0.992686562 | 0.996780154 |
| 244497_at   | -0.06339263  | -1.9707086  | 0.05348968  | 0.134427027 |
| 244498_x_at | 0.008618564  | 0.216468291 | 0.829374984 | 0.905339915 |
| 244499_at   | -0.0356158   | -0.96793402 | 0.337057627 | 0.519835028 |
| 244500_s_at | -0.1101994   | -2.7051114  | 0.008927506 | 0.031814694 |
| 244501_at   | -0.03483259  | -0.84142165 | 0.403534349 | 0.585886464 |
| 244502_at   | 0.112120498  | 2.015631752 | 0.048434476 | 0.124361348 |
| 244503_at   | 0.006892149  | 0.267114003 | 0.790319743 | 0.880580637 |
| 244504_x_at | -0.06784875  | -1.53329324 | 0.130588247 | 0.266094466 |
| 244505_at   | 0.014391933  | 0.55893924  | 0.578334252 | 0.735227261 |
| 244506_at   | -0.35971824  | -6.90907438 | 3.99E-09    | 2.35E-07    |
| 244507_at   | -0.02868314  | -0.84248352 | 0.402944778 | 0.585206512 |
| 244508_at   | 0.354398479  | 4.341077729 | 5.69E-05    | 0.000459276 |
| 244509_at   | -0.30320979  | -5.90649469 | 1.89E-07    | 4.14E-06    |
| 244510_at   | -0.02010251  | -0.76550542 | 0.447044716 | 0.626860171 |
| 244511_at   | 0.201025665  | 2.381253667 | 0.020524311 | 0.062874255 |
| 244512_at   | 0.055727899  | 1.356329667 | 0.180200281 | 0.336418019 |
| 244513_at   | -0.01620688  | -0.54267749 | 0.589411145 | 0.743901784 |
| 244514_at   | -0.02413435  | -0.738968   | 0.462877842 | 0.640819544 |
| 244515_at   | 0.017733408  | 0.614356352 | 0.541359252 | 0.706584984 |
| 244516_at   | -0.02218175  | -0.57140092 | 0.569914336 | 0.728580288 |
| 244517_x_at | -0.06413529  | -2.03417526 | 0.046470971 | 0.120466237 |
| 244518_at   | -0.02551532  | -0.75230285 | 0.454882023 | 0.63387339  |
| 244519_at   | 0.060299525  | 1.393770546 | 0.168653255 | 0.320633455 |
| 244520_at   | -0.03090881  | -0.88817915 | 0.378077689 | 0.560562919 |
| 244521_at   | -0.00527742  | -0.17569074 | 0.861142967 | 0.924304758 |
| 244522_at   | 0.0248023    | 0.572845345 | 0.568942279 | 0.7279881   |
| 244523_at   | -0.21894615  | -4.28800701 | 6.83E-05    | 0.000533727 |
| 244524_at   | -0.08035418  | -1.96985478 | 0.053589981 | 0.134628636 |
| 244525_at   | -0.01759949  | -0.7156662  | 0.477041179 | 0.652707164 |
| 244526_at   | -0.0346848   | -1.09884522 | 0.276332362 | 0.452723558 |
| 244527_at   | 0.049192341  | 1.467424679 | 0.14761053  | 0.290922222 |
| 244528_at   | 0.011428483  | 0.377654356 | 0.707052589 | 0.82742764  |
| 244529_at   | -0.01043226  | -0.34888998 | 0.728423129 | 0.841506885 |
| 244530_at   | 0.227348125  | 2.591386045 | 0.012047597 | 0.040617924 |
| 244531_at   | 0.008678721  | 0.27802041  | 0.781975855 | 0.875346697 |
| 244532_x_at | 0.115770494  | 1.534547667 | 0.130279895 | 0.265635707 |
| 244533_at   | 0.318676803  | 4.8472693   | 9.59E-06    | 0.000103125 |
| 244534_at   | -0.05502431  | -0.90876162 | 0.367200535 | 0.550389365 |
| 244535_at   | -0.0398797   | -1.05187995 | 0.29717544  | 0.476188188 |
| 244536_at   | -0.01182414  | -0.30154713 | 0.764065448 | 0.864340707 |
| 244537_at   | -0.10683022  | -2.68038743 | 0.00953495  | 0.033564585 |
| 244538_at   | 0.039297836  | 1.400307148 | 0.166697028 | 0.317953897 |
| 244539_at   | -0.04044775  | -1.00329107 | 0.319847794 | 0.501478253 |
| 244540_at   | -0.00314918  | -0.09514492 | 0.924524513 | 0.960523735 |
| 244541_x_at | -0.03672412  | -0.91682432 | 0.362994736 | 0.546135693 |
| 244542_at   | -0.09457495  | -2.62967596 | 0.01090071  | 0.037374184 |
| 244543_s_at | 0.008169742  | 0.296709077 | 0.767738355 | 0.866984096 |
| 244544_at   | -0.00505814  | -0.16953563 | 0.865959588 | 0.927595963 |

|             |             |             |             |             |
|-------------|-------------|-------------|-------------|-------------|
| 244545_at   | 0.012057174 | 0.464771226 | 0.643818639 | 0.783624517 |
| 244546_at   | -0.03621221 | -0.41530449 | 0.67943663  | 0.80808425  |
| 244547_at   | -0.04012628 | -0.56983506 | 0.57096903  | 0.729411956 |
| 244548_at   | 0.029739617 | 0.554264683 | 0.581508089 | 0.737583639 |
| 244549_at   | -0.02791073 | -0.96793527 | 0.337057008 | 0.519835028 |
| 244550_at   | -0.07003413 | -2.27569597 | 0.026538309 | 0.077269722 |
| 244551_at   | -0.09041865 | -2.73304681 | 0.008283947 | 0.02993662  |
| 244552_at   | 0.098785277 | 2.324645041 | 0.023578233 | 0.070424273 |
| 244553_at   | -0.06174668 | -1.96467566 | 0.054201855 | 0.135889996 |
| 244554_at   | -0.01759911 | -0.43467755 | 0.665393946 | 0.798421243 |
| 244555_at   | -0.00920415 | -0.20684532 | 0.836848137 | 0.910019262 |
| 244556_at   | 0.013542563 | 0.464069782 | 0.644318134 | 0.783987641 |
| 244557_at   | -0.03998711 | -1.1610069  | 0.250349463 | 0.422882237 |
| 244558_at   | -0.09415621 | -2.58244528 | 0.012330731 | 0.041369644 |
| 244559_at   | 0.014120266 | 0.508869384 | 0.612755577 | 0.761188322 |
| 244560_at   | 0.007256058 | 0.199389495 | 0.842648727 | 0.91360367  |
| 244561_at   | -0.38406512 | -5.86680397 | 2.20E-07    | 4.63E-06    |
| 244562_s_at | 0.039869734 | 1.132695021 | 0.261958352 | 0.436454022 |
| 244563_at   | 0.012721632 | 0.258099983 | 0.797234575 | 0.885019689 |
| 244564_at   | -0.0018992  | -0.06834448 | 0.94574422  | 0.972056384 |
| 244565_at   | -0.00275291 | -0.08864407 | 0.929667208 | 0.963337434 |
| 244566_at   | 0.024545455 | 0.565607685 | 0.573821156 | 0.731745435 |
| 244567_at   | -0.01876362 | -0.85493829 | 0.396069224 | 0.57871499  |
| 244568_at   | 0.078843779 | 2.54746362  | 0.013497543 | 0.044548571 |
| 244569_at   | 0.056365837 | 1.121355779 | 0.266713268 | 0.442019853 |
| 244570_at   | -0.03187607 | -0.89263332 | 0.375706704 | 0.558573706 |
| 244571_s_at | 0.066231586 | 1.707061248 | 0.093107791 | 0.206241538 |
| 244572_at   | 0.021033434 | 0.514774042 | 0.608648299 | 0.758045599 |
| 244573_at   | -0.07161777 | -1.87174782 | 0.066238055 | 0.158917283 |
| 244574_at   | -0.06946098 | -2.15113878 | 0.035602052 | 0.097567263 |
| 244575_at   | 0.002955206 | 0.108673431 | 0.913832994 | 0.954246988 |
| 244576_at   | 0.017996941 | 0.461163629 | 0.646389347 | 0.785438627 |
| 244577_at   | -0.06142221 | -1.40527905 | 0.165220823 | 0.315796537 |
| 244578_at   | -0.01411928 | -0.45987978 | 0.647305243 | 0.786059993 |
| 244579_at   | 0.421442954 | 5.746400276 | 3.46E-07    | 6.73E-06    |
| 244580_at   | 0.008202262 | 0.231999056 | 0.817347495 | 0.898006451 |
| 244581_at   | -0.00872232 | -0.2350145  | 0.815017257 | 0.896410672 |
| 244582_at   | -0.0013191  | -0.04042377 | 0.967892775 | 0.983696363 |
| 244583_at   | 0.020951574 | 0.617282367 | 0.539441125 | 0.705200888 |
| 244584_at   | -0.14734364 | -4.28968138 | 6.79E-05    | 0.00053105  |
| 244585_at   | -0.09484944 | -2.16063664 | 0.034825959 | 0.095875432 |
| 244586_x_at | 0.067603033 | 2.635237763 | 0.010742658 | 0.03694013  |
| 244587_at   | 0.255875106 | 6.10159372  | 8.98E-08    | 2.32E-06    |
| 244588_at   | 0.002600931 | 0.063009971 | 0.949973125 | 0.974347062 |
| 244589_at   | -0.03650203 | -1.18778824 | 0.239711709 | 0.409572799 |
| 244590_at   | 0.009969402 | 0.221572085 | 0.825417775 | 0.903135218 |
| 244591_x_at | -0.01959443 | -0.433439   | 0.666288195 | 0.799059519 |
| 244592_at   | 0.243349656 | 5.887260844 | 2.03E-07    | 4.37E-06    |
| 244593_at   | -0.1029382  | -1.97315748 | 0.05320289  | 0.133887648 |
| 244594_x_at | -0.03591132 | -1.27195423 | 0.208416903 | 0.37249333  |
| 244595_at   | -0.07178198 | -1.546397   | 0.127395716 | 0.261206708 |
| 244596_at   | 0.068176299 | 2.15549468  | 0.035244262 | 0.096758802 |
| 244597_at   | 0.191492317 | 5.282052048 | 1.96E-06    | 2.79E-05    |
| 244598_at   | 0.010381775 | 0.300303792 | 0.765008837 | 0.864969734 |
| 244599_at   | 0.025519922 | 0.788565932 | 0.433546216 | 0.614378281 |
| 244600_at   | 0.075672628 | 2.007322999 | 0.049337195 | 0.126157336 |
| 244601_at   | -0.10490666 | -2.66684287 | 0.009883534 | 0.034548018 |
| 244602_at   | -0.05224587 | -1.7621001  | 0.083270708 | 0.189253092 |
| 244603_at   | 0.028571925 | 0.789634342 | 0.432926734 | 0.613785541 |
| 244604_at   | 0.01537527  | 0.577854691 | 0.565577444 | 0.725975092 |
| 244605_at   | 0.030482675 | 0.708444742 | 0.481479455 | 0.656782935 |
| 244606_at   | -0.04991442 | -1.73373528 | 0.088226882 | 0.19798332  |
| 244607_at   | 0.15517149  | 4.674782978 | 1.77E-05    | 0.000172384 |
| 244608_at   | 0.016563388 | 0.513742806 | 0.609364719 | 0.758578537 |
| 244609_at   | -0.02569131 | -0.66847139 | 0.506458958 | 0.677989029 |
| 244610_x_at | 0.0587629   | 1.469540103 | 0.147038022 | 0.290001028 |
| 244611_at   | 0.082977981 | 2.884970126 | 0.005470645 | 0.021218435 |
| 244612_at   | -0.01948941 | -0.76491354 | 0.447394375 | 0.627095795 |
| 244613_at   | -0.10697357 | -2.51175983 | 0.014790774 | 0.048015493 |
| 244614_at   | 0.017183081 | 0.606320745 | 0.546644841 | 0.710463632 |
| 244615_x_at | 0.073234512 | 1.796807108 | 0.077523306 | 0.179182436 |
| 244616_x_at | -0.01393822 | -0.64870252 | 0.519066323 | 0.688432564 |
| 244617_at   | 0.034484153 | 1.015687946 | 0.313955723 | 0.49503631  |
| 244618_at   | 0.042724079 | 1.345051795 | 0.183793995 | 0.340987719 |
| 244619_at   | 0.027514448 | 0.81770187  | 0.416841764 | 0.599173168 |

|             |             |             |             |             |
|-------------|-------------|-------------|-------------|-------------|
| 244620_at   | 0.045113642 | 1.370174399 | 0.175862153 | 0.330472662 |
| 244621_x_at | 0.015929755 | 0.81786886  | 0.41674716  | 0.599078159 |
| 244622_at   | 0.043724509 | 1.687767153 | 0.096775118 | 0.212296962 |
| 244623_at   | -1.24605679 | -7.58548908 | 2.87E-10    | 4.12E-08    |
| 244624_at   | 0.049790447 | 1.740658533 | 0.08699521  | 0.195911089 |
| 244625_at   | 0.160800518 | 3.07625448  | 0.003184431 | 0.013502712 |
| 244626_at   | -0.01663296 | -0.40583574 | 0.686342243 | 0.812685659 |
| 244627_at   | -0.00369877 | -0.12270285 | 0.902762505 | 0.948313139 |
| 244628_at   | -0.0336399  | -1.02743208 | 0.308441861 | 0.488964374 |
| 244629_s_at | -0.08329396 | -2.09405119 | 0.040593108 | 0.108135374 |
| 244630_at   | -0.00072736 | -0.01774724 | 0.985900819 | 0.993167574 |
| 244631_at   | 0.042379423 | 0.956456268 | 0.342773343 | 0.52569335  |
| 244632_at   | -0.05569008 | -2.19360364 | 0.03224597  | 0.090274174 |
| 244633_at   | 0.054908913 | 1.232111479 | 0.222831279 | 0.38996844  |
| 244634_at   | 0.151968012 | 4.014001831 | 0.000171966 | 0.001159902 |
| 244635_s_at | 0.068835803 | 2.1347651   | 0.036975551 | 0.100493269 |
| 244636_at   | 0.058098902 | 1.762801782 | 0.083151096 | 0.189061294 |
| 244637_at   | -0.02608559 | -0.8821048  | 0.381326303 | 0.564106953 |
| 244638_at   | -0.04805624 | -1.69578751 | 0.0952365   | 0.209732416 |
| 244639_at   | 0.032480035 | 1.354254489 | 0.180857489 | 0.337222367 |
| 244640_at   | 0.068999076 | 2.872290817 | 0.005666306 | 0.021836556 |
| 244641_at   | 0.033069368 | 1.019975633 | 0.311934995 | 0.492910893 |
| 244642_at   | 0.111372695 | 3.433300325 | 0.001100778 | 0.005515861 |
| 244643_at   | -0.00584053 | -0.1531535  | 0.87880369  | 0.93501563  |
| 244644_at   | -0.03152156 | -1.54797403 | 0.127015731 | 0.260708425 |
| 244645_at   | -0.03033229 | -1.23237686 | 0.222732905 | 0.389863274 |
| 244646_at   | 0.166914244 | 3.826588144 | 0.00031811  | 0.001954491 |
| 244647_at   | -0.32113958 | -4.52656005 | 2.99E-05    | 0.000267743 |
| 244648_at   | 0.125092978 | 2.64104711  | 0.010579805 | 0.036483999 |
| 244649_at   | -0.05850029 | -1.50390586 | 0.137979466 | 0.277049973 |
| 244650_at   | 0.037641813 | 1.129314776 | 0.263369473 | 0.438107226 |
| 244651_at   | 0.007180724 | 0.213054328 | 0.832024476 | 0.907168526 |
| 244652_at   | 0.014347761 | 0.45582202  | 0.650203639 | 0.788101618 |
| 244653_at   | -0.02565198 | -0.8519537  | 0.397710187 | 0.580053508 |
| 244654_at   | 0.062323491 | 1.497026697 | 0.139756557 | 0.279650774 |
| 244655_at   | 0.047768603 | 1.185374649 | 0.240656794 | 0.410723211 |
| 244656_at   | -0.19896243 | -3.50373428 | 0.000885973 | 0.004608999 |
| 244657_at   | -0.06047404 | -1.83084489 | 0.072212462 | 0.169662463 |
| 244658_at   | -0.01839675 | -0.78405943 | 0.43616494  | 0.61667458  |
| 244659_at   | -0.05843393 | -1.09315158 | 0.27880333  | 0.455698165 |
| 244660_at   | -0.4384816  | -4.66091475 | 1.86E-05    | 0.000179852 |
| 244661_at   | -0.00322198 | -0.15348435 | 0.878543964 | 0.934898967 |
| 244662_at   | -0.12360227 | -2.68895931 | 0.009320191 | 0.032966995 |
| 244663_at   | -0.08992187 | -1.97171927 | 0.053371159 | 0.134194245 |
| 244664_at   | 0.058658382 | 1.930667365 | 0.058370016 | 0.143831547 |
| 244665_at   | 0.142218413 | 3.184088844 | 0.0023266   | 0.01035043  |
| 244666_at   | -0.06834621 | -2.0731992  | 0.042562321 | 0.112329942 |
| 244667_at   | 0.02403609  | 0.785393091 | 0.435388977 | 0.61604111  |
| 244668_at   | -0.07344303 | -2.43073505 | 0.018150021 | 0.056967537 |
| 244669_at   | 0.327895845 | 5.228409664 | 2.39E-06    | 3.28E-05    |
| 244670_at   | 0.0474967   | 1.339200943 | 0.185679703 | 0.343434063 |
| 244671_at   | -0.04226252 | -1.29104119 | 0.201762279 | 0.364035517 |
| 244672_at   | 0.03977146  | 1.19100979  | 0.238454441 | 0.408111127 |
| 244673_at   | 0.100290661 | 3.039491772 | 0.003539003 | 0.014769363 |
| 244674_at   | 0.083558574 | 1.493680475 | 0.140627492 | 0.280915562 |
| 244675_at   | -1.00756227 | -7.24141799 | 1.10E-09    | 9.89E-08    |
| 244676_s_at | -0.12543108 | -3.21485214 | 0.002124931 | 0.009592668 |
| 244677_at   | 0.449920489 | 4.115043825 | 0.000122719 | 0.000877251 |
| 244678_at   | -0.03833888 | -1.30266681 | 0.197787645 | 0.358790658 |
| 244679_at   | -0.03644191 | -1.41902292 | 0.161192648 | 0.310023747 |
| 244680_at   | -0.4268812  | -5.82533713 | 2.57E-07    | 5.28E-06    |
| 244681_at   | -0.0418138  | -1.09067618 | 0.279882414 | 0.457003246 |
| 244682_at   | 0.047568244 | 1.337512378 | 0.18622664  | 0.344004341 |
| 244683_at   | 0.019009437 | 0.56021576  | 0.577469    | 0.73454517  |
| 244684_at   | -0.05532059 | -1.50246942 | 0.138349059 | 0.277617463 |
| 244685_at   | -0.02228209 | -0.63556088 | 0.527538349 | 0.695479171 |
| 244686_at   | 0.06287646  | 2.009619049 | 0.0490863   | 0.125666777 |
| 244687_at   | 0.036509293 | 0.942653427 | 0.349730585 | 0.532816066 |
| 244688_at   | -0.24267075 | -5.64558333 | 5.06E-07    | 9.15E-06    |
| 244689_at   | 0.273971748 | 5.707567105 | 4.01E-07    | 7.58E-06    |
| 244690_at   | 0.005440698 | 0.180074425 | 0.857715771 | 0.922383359 |
| 244691_at   | 0.04670181  | 1.488075963 | 0.142095785 | 0.283013718 |
| 244692_at   | 0.088184082 | 2.173412367 | 0.033805417 | 0.093671752 |
| 244693_at   | 0.289736025 | 6.008537811 | 1.28E-07    | 3.07E-06    |
| 244694_at   | -0.05524369 | -1.26751363 | 0.209988252 | 0.374612605 |

|             |             |             |             |             |
|-------------|-------------|-------------|-------------|-------------|
| 244695_at   | -0.05912624 | -1.18025336 | 0.242671036 | 0.413344777 |
| 244696_at   | -0.06502898 | -1.83383899 | 0.071760281 | 0.168866389 |
| 244697_at   | 0.346420151 | 4.472056598 | 3.62E-05    | 0.000314655 |
| 244698_at   | 0.058426607 | 1.504805478 | 0.137748395 | 0.276710323 |
| 244699_at   | 0.10416464  | 1.698057147 | 0.094804761 | 0.208997898 |
| 244700_at   | -0.05050026 | -1.45446579 | 0.151155886 | 0.295928634 |
| 244701_at   | 0.053815374 | 1.561961959 | 0.12368482  | 0.255416411 |
| 244702_at   | 0.113533171 | 3.261116528 | 0.001852357 | 0.008562775 |
| 244703_x_at | 0.012077077 | 0.465961083 | 0.642971724 | 0.783120317 |
| 244704_at   | -0.01022682 | -0.33249004 | 0.740706423 | 0.84949695  |
| 244705_at   | -0.02191174 | -0.6253809  | 0.534150466 | 0.70078534  |
| 244706_at   | -0.00556312 | -0.21775328 | 0.828378247 | 0.904693822 |
| 244707_at   | -0.04381139 | -0.91815779 | 0.362302136 | 0.545534418 |
| 244708_at   | -0.40557187 | -7.31549759 | 8.21E-10    | 8.31E-08    |
| 244709_at   | -0.14133951 | -3.63436299 | 0.000588687 | 0.003287055 |
| 244710_at   | 0.058663124 | 0.970333666 | 0.335870637 | 0.518666616 |
| 244711_at   | -0.01708247 | -0.50349477 | 0.616505043 | 0.764104478 |
| 244712_at   | 0.002828369 | 0.076258524 | 0.939473334 | 0.968333538 |
| 244713_at   | -0.07381377 | -2.08953674 | 0.041012592 | 0.109096767 |
| 244714_at   | 0.00043465  | 0.013576034 | 0.989214367 | 0.9949255   |
| 244715_at   | 0.000285089 | 0.00747732  | 0.99405943  | 0.997248681 |
| 244716_x_at | 0.098407515 | 2.433505817 | 0.018024671 | 0.056660424 |
| 244717_x_at | -0.0808464  | -2.55608658 | 0.013200982 | 0.043741808 |
| 244718_at   | 0.017743059 | 0.49098949  | 0.625268714 | 0.770372977 |
| 244719_at   | -0.00120802 | -0.03501527 | 0.972186639 | 0.985885623 |
| 244720_at   | -0.08589121 | -2.98333784 | 0.004152331 | 0.016916681 |
| 244721_at   | -0.02328028 | -0.71616679 | 0.476734374 | 0.652469933 |
| 244722_at   | 0.062816783 | 1.816670129 | 0.074385804 | 0.173539736 |
| 244723_at   | -0.02657978 | -1.08402676 | 0.282795459 | 0.460174573 |
| 244724_at   | -0.22614315 | -4.7976463  | 1.15E-05    | 0.000119357 |
| 244725_at   | 0.051787805 | 1.020996938 | 0.311454968 | 0.492396102 |
| 244726_at   | -0.42908673 | -6.19444832 | 6.29E-08    | 1.76E-06    |
| 244727_at   | 0.01296668  | 0.403504619 | 0.688046497 | 0.81403092  |
| 244728_at   | -0.04680983 | -1.55177216 | 0.126104286 | 0.259388124 |
| 244729_at   | -0.00992453 | -0.22660996 | 0.821516137 | 0.900765436 |
| 244730_x_at | -0.01691505 | -0.46786914 | 0.641614607 | 0.782274116 |
| 244731_at   | 0.314823592 | 2.741783722 | 0.008091586 | 0.029367319 |
| 244732_at   | -0.06702289 | -2.14513205 | 0.036100651 | 0.098649362 |
| 244733_at   | 0.071848082 | 1.780818762 | 0.08012842  | 0.183947984 |
| 244734_at   | -0.04153557 | -1.95028611 | 0.05593334  | 0.13928221  |
| 244735_at   | -0.08109587 | -2.01867118 | 0.048107826 | 0.123741753 |
| 244736_at   | -0.00385706 | -0.11459008 | 0.909161998 | 0.951932059 |
| 244737_at   | 0.032737635 | 0.875492405 | 0.384882587 | 0.567526892 |
| 244738_at   | 0.082395572 | 2.199181077 | 0.031826504 | 0.089295631 |
| 244739_at   | -0.00671818 | -0.10490135 | 0.916812535 | 0.955822194 |
| 244740_at   | -0.13725865 | -2.27461974 | 0.026606936 | 0.077401366 |
| 244741_s_at | -0.20041285 | -2.93286679 | 0.004786614 | 0.019032327 |
| 244742_at   | -0.0366959  | -0.94945129 | 0.346292746 | 0.529365009 |
| 244743_x_at | -0.07450342 | -1.6470335  | 0.104907065 | 0.225778028 |
| 244744_at   | -0.08620654 | -1.98006501 | 0.052401037 | 0.132348524 |
| 244745_at   | -0.83119652 | -8.05122777 | 4.71E-11    | 1.38E-08    |
| 244746_at   | -0.0499797  | -1.06360539 | 0.291873319 | 0.470305826 |
| 244747_at   | -0.06855552 | -2.01665331 | 0.048324476 | 0.124119827 |
| 244748_at   | -0.00356478 | -0.11728337 | 0.907036795 | 0.950619995 |
| 244749_at   | 0.074631194 | 2.690362368 | 0.009285463 | 0.032875381 |
| 244750_at   | 0.031310097 | 0.840329309 | 0.404141392 | 0.586388348 |
| 244751_at   | -0.00229536 | -0.06128555 | 0.951340464 | 0.975105834 |
| 244752_at   | 0.019632136 | 0.511485079 | 0.61093455  | 0.759876625 |
| 244753_at   | 0.298004743 | 3.959139944 | 0.000206196 | 0.001350228 |
| 244754_at   | -0.02250626 | -0.99300736 | 0.324791452 | 0.507023633 |
| 244755_at   | 0.04636705  | 1.23453676  | 0.221933443 | 0.388891324 |
| 244756_at   | 0.037736618 | 1.173192581 | 0.245467993 | 0.416842295 |
| 244757_at   | 0.023283987 | 0.63233681  | 0.529627811 | 0.697061758 |
| 244758_at   | -0.22011534 | -4.8958696  | 8.05E-06    | 8.91E-05    |
| 244759_x_at | 0.029605013 | 0.995873558 | 0.323408493 | 0.505429673 |
| 244760_at   | 0.067513029 | 1.303885987 | 0.197374255 | 0.358346206 |
| 244761_at   | 0.116852733 | 2.446698076 | 0.017438452 | 0.055109553 |
| 244762_at   | -0.03259509 | -0.96432813 | 0.338846488 | 0.521603942 |
| 244763_at   | -0.01005571 | -0.38856423 | 0.699007528 | 0.821911769 |
| 244764_at   | -0.0557086  | -1.41125035 | 0.163461251 | 0.313227725 |
| 244765_at   | -0.0872366  | -1.90424729 | 0.061793879 | 0.150500929 |
| 244766_at   | 0.174461309 | 3.146850368 | 0.002594764 | 0.011355778 |
| 244767_at   | -0.02356433 | -1.15448312 | 0.252991231 | 0.425976118 |
| 244768_at   | -0.02436147 | -0.71693539 | 0.476263526 | 0.65213451  |
| 244769_at   | -0.06435494 | -1.77376553 | 0.081300641 | 0.185979847 |

|             |             |             |             |             |
|-------------|-------------|-------------|-------------|-------------|
| 244770_at   | -0.12740697 | -3.15025151 | 0.002569118 | 0.011257871 |
| 244771_at   | -0.00043801 | -0.00833168 | 0.993380676 | 0.997061131 |
| 244772_at   | 0.009596315 | 0.304747746 | 0.761638617 | 0.862797306 |
| 244773_at   | 0.002353106 | 0.057366391 | 0.954448612 | 0.976618516 |
| 244774_at   | 0.144838788 | 1.143442973 | 0.25750714  | 0.431244457 |
| 244775_at   | -0.01368972 | -0.60171163 | 0.549688375 | 0.712697211 |
| 244776_at   | 0.02133947  | 0.627042418 | 0.533068348 | 0.699984124 |
| 244777_at   | 0.109269176 | 2.331226222 | 0.023203522 | 0.069472218 |
| 244778_x_at | 0.055295278 | 1.390032118 | 0.169779981 | 0.322086673 |
| 244779_at   | 0.164688957 | 2.738611177 | 0.008160957 | 0.029571063 |
| 244780_at   | -0.37393241 | -3.97091231 | 0.000198338 | 0.00130836  |
| 244781_x_at | 0.037140387 | 1.309665281 | 0.195423469 | 0.355884906 |
| 244782_at   | -0.01178684 | -0.43207241 | 0.667275451 | 0.799637681 |
| 244783_at   | 0.010545727 | 0.382227275 | 0.703676319 | 0.825251969 |
| 244784_at   | -0.05534347 | -2.00556418 | 0.049530131 | 0.126556549 |
| 244785_at   | -0.05377332 | -1.59653574 | 0.115751545 | 0.243020061 |
| 244786_at   | 0.156047339 | 4.036202908 | 0.000159733 | 0.001090221 |
| 244787_at   | -0.01841331 | -0.36339059 | 0.717621547 | 0.8346548   |
| 244788_at   | 0.11008197  | 2.223547936 | 0.030049698 | 0.08524158  |
| 244789_at   | -0.00148817 | -0.03852401 | 0.969400911 | 0.984579813 |
| 244790_at   | -0.15782622 | -4.06688029 | 0.000144202 | 0.001001454 |
| 244791_at   | 0.068746931 | 2.088643658 | 0.041096023 | 0.109279672 |
| 244792_at   | -0.0221319  | -0.59340467 | 0.555195246 | 0.71750581  |
| 244793_at   | -0.02498956 | -0.82718707 | 0.411488745 | 0.593719022 |
| 244794_at   | 0.001070744 | 0.031466128 | 0.975004794 | 0.98731299  |
| 244795_at   | -0.04357976 | -1.22900612 | 0.223984769 | 0.391181215 |
| 244796_at   | -0.08403626 | -2.54756419 | 0.01349405  | 0.044546911 |
| 244797_at   | 0.034230499 | 1.037534706 | 0.303751549 | 0.48357013  |
| 244798_at   | 0.021213385 | 0.586800651 | 0.559592844 | 0.721228613 |
| 244799_s_at | 0.039874783 | 1.026756472 | 0.308757266 | 0.489263436 |
| 244800_x_at | -0.02606463 | -0.72586937 | 0.470809703 | 0.647309027 |
| 244801_at   | 0.06419341  | 1.647506821 | 0.104809472 | 0.225600583 |
| 244802_at   | -0.00334306 | -0.12026456 | 0.904685208 | 0.949437489 |
| 244803_at   | 0.201771265 | 2.737371078 | 0.008188221 | 0.029655428 |
| 244804_at   | 0.422458946 | 5.044221296 | 4.70E-06    | 5.73E-05    |
| 244805_at   | 0.124858983 | 3.392348475 | 0.001247489 | 0.006133417 |
| 244806_at   | -0.02601719 | -0.71153057 | 0.479580103 | 0.654994773 |
| 244807_at   | -0.03861371 | -0.93052542 | 0.355918982 | 0.539010239 |
| 244808_at   | 0.122200302 | 2.765021703 | 0.007599742 | 0.027862813 |
| 244809_at   | 0.003846982 | 0.116624948 | 0.907556274 | 0.951008323 |
| 244810_at   | -0.085675   | -2.36452821 | 0.021387567 | 0.065055002 |
| 244811_at   | -0.12061189 | -2.28221438 | 0.026125993 | 0.076390113 |
| 244812_at   | -0.04091456 | -1.43200358 | 0.157458427 | 0.304769684 |
| 244813_at   | 0.154978143 | 3.285278801 | 0.001723444 | 0.008050182 |
| 244814_at   | -0.00335251 | -0.1015769  | 0.919439483 | 0.957511112 |
| 244815_at   | 0.07446864  | 1.935730728 | 0.057732634 | 0.142725239 |
| 244816_at   | -0.01291331 | -0.38010151 | 0.705245072 | 0.826246173 |
| 244817_at   | 0.002213912 | 0.066232698 | 0.947418145 | 0.972999327 |
| 244818_at   | -0.01633772 | -0.52939118 | 0.598535137 | 0.750550078 |
| 244819_x_at | 0.016188648 | 0.444898775 | 0.658032865 | 0.793140257 |
| 244820_at   | 0.034703205 | 1.154381507 | 0.253032537 | 0.425997518 |
| 244821_at   | 0.005796593 | 0.22691477  | 0.821280214 | 0.900617233 |
| 244822_at   | 0.063577475 | 2.28829922  | 0.025746238 | 0.075467361 |
| 244823_at   | -0.01107831 | -0.30781777 | 0.759313067 | 0.861431172 |
| 244824_at   | -0.00726471 | -0.2069033  | 0.836803062 | 0.910003223 |
| 244825_at   | 0.198789065 | 4.100709539 | 0.000128767 | 0.000913466 |
| 244826_at   | 0.302322664 | 3.8017837   | 0.000344715 | 0.002089519 |
| 244827_at   | 0.011514192 | 0.359921664 | 0.720200403 | 0.836183109 |
| 244828_x_at | -0.0871421  | -2.04787095 | 0.045065262 | 0.117622886 |
| 244829_at   | 0.01102584  | 0.326785309 | 0.744995316 | 0.852291353 |
| 244830_at   | 0.01163927  | 0.283621808 | 0.777700451 | 0.87253651  |
| 244831_at   | -0.01708255 | -0.51143048 | 0.610972538 | 0.759902727 |
| 244832_at   | -0.04321776 | -1.32358128 | 0.190785707 | 0.349722933 |
| 244833_at   | -0.0561983  | -1.83284416 | 0.071910259 | 0.169148069 |
| 244834_at   | -0.04844976 | -0.90936698 | 0.366883681 | 0.550060903 |
| 244835_at   | -0.06037704 | -2.13126966 | 0.037274689 | 0.101109516 |
| 244836_at   | 0.00046444  | 0.014831084 | 0.988217349 | 0.994559636 |
| 244837_at   | -0.02542464 | -0.76514535 | 0.447257414 | 0.626962811 |
| 244838_at   | 0.059274583 | 2.490187168 | 0.01562544  | 0.050304867 |
| 244839_at   | -0.05126116 | -1.29419579 | 0.200677907 | 0.362708659 |
| 244840_x_at | 0.354475802 | 5.745363144 | 3.48E-07    | 6.75E-06    |
| 244841_at   | -0.00363794 | -0.12341854 | 0.902198256 | 0.948016657 |
| 244842_x_at | 0.142427052 | 2.71063668  | 0.008796694 | 0.031426208 |
| 244843_x_at | -0.00144028 | -0.04590174 | 0.963544726 | 0.981285683 |
| 244844_at   | -0.06049979 | -2.10663335 | 0.039443601 | 0.10569693  |

|             |             |             |             |             |
|-------------|-------------|-------------|-------------|-------------|
| 244845_at   | -0.05204534 | -1.03518169 | 0.304839612 | 0.484836011 |
| 244846_at   | 0.157627641 | 3.176230676 | 0.002380925 | 0.010551144 |
| 244847_at   | -0.0601049  | -1.55921568 | 0.124333208 | 0.256482794 |
| 244848_at   | -0.1084971  | -4.13402868 | 0.000115131 | 0.000830312 |
| 244849_at   | -0.06123731 | -2.24228531 | 0.028743453 | 0.082286834 |
| 244850_at   | 0.020304296 | 0.681224759 | 0.498414127 | 0.671402603 |
| 244851_at   | 0.011223239 | 0.327360182 | 0.744562749 | 0.852063691 |
| 244852_at   | -0.03319607 | -1.30570837 | 0.196757542 | 0.357604232 |
| 244853_at   | -0.03877959 | -1.13237341 | 0.262092382 | 0.43659595  |
| 244854_at   | -0.05430108 | -1.21066831 | 0.23088573  | 0.399052504 |
| 244855_at   | -0.04672308 | -1.31039393 | 0.195178547 | 0.355515147 |
| 244856_at   | -0.04101907 | -1.23469855 | 0.221873645 | 0.388831718 |
| 244857_at   | 0.032363588 | 1.075995059 | 0.286342084 | 0.464289098 |
| 244858_at   | -0.01016863 | -0.27638675 | 0.783224066 | 0.876084128 |
| 244859_at   | 0.072672499 | 1.563342021 | 0.123360014 | 0.254886997 |
| 244860_at   | 0.044677829 | 0.503560248 | 0.616459299 | 0.764071221 |
| 244861_at   | 0.052550972 | 1.657149707 | 0.102837263 | 0.222312464 |
| 244862_at   | 0.063258668 | 1.809200356 | 0.075552994 | 0.175627505 |
| 244863_at   | -0.03263378 | -0.84169952 | 0.403380021 | 0.585719481 |
| 244864_at   | -0.0045653  | -0.15883968 | 0.874341656 | 0.932393942 |
| 244865_at   | -0.03090308 | -0.56925734 | 0.571358401 | 0.729763357 |
| 244866_at   | 0.008443235 | 0.308694365 | 0.758649449 | 0.86112413  |
| 244867_at   | 0.014194697 | 0.438013627 | 0.662987702 | 0.796576239 |
| 244868_at   | 0.279856251 | 5.494688787 | 8.91E-07    | 1.46E-05    |
| 244869_at   | 0.163791493 | 2.958285344 | 0.004456704 | 0.017948908 |
| 244870_at   | -0.04519127 | -1.10273766 | 0.274651936 | 0.45092922  |
| 244871_s_at | 0.111677032 | 3.190561842 | 0.002282728 | 0.010183638 |
| 244872_at   | 0.345372026 | 4.701833708 | 1.61E-05    | 0.000159556 |
| 244873_s_at | -0.01561804 | -0.49429518 | 0.622946734 | 0.768426738 |
| 244874_at   | -0.02833107 | -0.72957384 | 0.468558692 | 0.645437381 |
| 244875_at   | -0.04645972 | -1.04783748 | 0.29901862  | 0.478250016 |
| 244876_at   | 0.042934589 | 1.314253752 | 0.193884997 | 0.353912789 |
| 244877_at   | -0.00151576 | -0.03996558 | 0.968256495 | 0.983882832 |
| 244878_at   | 0.013993561 | 0.313918056 | 0.754698716 | 0.859009169 |
| 244879_at   | -0.08693778 | -2.02598098 | 0.047329997 | 0.122157094 |
| 244880_at   | -0.04874878 | -1.14025772 | 0.258820648 | 0.432823662 |
| 244881_at   | -0.0494816  | -0.95496099 | 0.34352262  | 0.526390761 |
| 244882_at   | -0.00400969 | -0.0819112  | 0.934996625 | 0.966170385 |
| 244883_at   | -0.04496167 | -1.11439943 | 0.269660264 | 0.445292018 |
| 244884_at   | -0.08812036 | -2.14992883 | 0.035701999 | 0.097758518 |
| 244885_at   | -0.26981748 | -5.80950252 | 2.73E-07    | 5.51E-06    |
| 244886_at   | 0.029658472 | 1.085195849 | 0.282281771 | 0.459590266 |
| 244887_at   | -0.04106406 | -1.27048404 | 0.208936172 | 0.373227363 |
| 244888_at   | -0.05450984 | -2.01684691 | 0.048303653 | 0.124096739 |
| 244889_at   | 0.009160377 | 0.248184587 | 0.804859751 | 0.890061473 |
| 244890_at   | -0.01442006 | -0.37302921 | 0.710473443 | 0.829913202 |
| 244891_x_at | -0.03240674 | -1.10310815 | 0.274492362 | 0.450799715 |
| 266_s_at    | 0.602114832 | 3.262986172 | 0.001842066 | 0.008518792 |
| 31637_s_at  | 0.066223383 | 1.252128064 | 0.215500623 | 0.381401625 |
| 31799_at    | -0.01741433 | -0.65056032 | 0.517874496 | 0.687453521 |
| 31807_at    | 0.012879693 | 0.501089021 | 0.618186688 | 0.765518665 |
| 31826_at    | 0.069267342 | 2.988257519 | 0.00409488  | 0.016723783 |
| 31835_at    | 0.024235335 | 1.05853904  | 0.294156216 | 0.472808114 |
| 31837_at    | 0.102676445 | 3.188769063 | 0.002294801 | 0.010227913 |
| 31845_at    | 0.170425787 | 6.482726792 | 2.08E-08    | 7.58E-07    |
| 31846_at    | 0.055332184 | 1.946358732 | 0.056414049 | 0.140225621 |
| 31861_at    | -0.02398106 | -0.83457583 | 0.407347998 | 0.589699298 |
| 31874_at    | 0.232722223 | 3.164054598 | 0.002467457 | 0.010874232 |
| 320_at      | 0.154167834 | 2.310534311 | 0.024399857 | 0.072346475 |
| 32029_at    | -0.04606144 | -1.41779033 | 0.16155077  | 0.310418634 |
| 32032_at    | 0.062424661 | 2.434532903 | 0.017978403 | 0.056544039 |
| 32042_at    | 0.031082232 | 1.223192932 | 0.226155844 | 0.393665315 |
| 32062_at    | 0.010704501 | 0.443096709 | 0.65932823  | 0.794066434 |
| 32069_at    | 0.147502214 | 3.401829629 | 0.00121196  | 0.005984411 |
| 32088_at    | -0.02854755 | -1.97855666 | 0.052575242 | 0.132659163 |
| 32091_at    | -0.14245194 | -3.03090683 | 0.00362695  | 0.015078663 |
| 32094_at    | 0.218400104 | 4.607859389 | 2.25E-05    | 0.000210515 |
| 32099_at    | 0.432274572 | 4.779144262 | 1.22E-05    | 0.000126053 |
| 32128_at    | -0.00329789 | -0.15830648 | 0.874759901 | 0.932604234 |
| 32137_at    | -0.02941581 | -0.65649403 | 0.514077602 | 0.684679583 |
| 32209_at    | -0.1874595  | -6.09859606 | 9.08E-08    | 2.34E-06    |
| 32259_at    | 0.180124314 | 5.684336572 | 4.38E-07    | 8.16E-06    |
| 32402_s_at  | -0.01914586 | -0.61276473 | 0.54240409  | 0.707205957 |
| 32502_at    | -0.06647279 | -1.72506927 | 0.08978888  | 0.20060211  |
| 32540_at    | -0.01406765 | -0.55290832 | 0.582430564 | 0.73827179  |

|            |             |             |             |             |
|------------|-------------|-------------|-------------|-------------|
| 32541_at   | 0.108918772 | 4.077581739 | 0.000139135 | 0.000972817 |
| 32625_at   | 0.087896286 | 2.321383701 | 0.023765912 | 0.070871164 |
| 32699_s_at | -0.01499862 | -0.54148672 | 0.590226186 | 0.744311193 |
| 32723_at   | -0.03856345 | -2.13206468 | 0.037206466 | 0.100967355 |
| 32811_at   | 0.014740104 | 0.397437204 | 0.692489922 | 0.817495895 |
| 32836_at   | -0.10994128 | -2.70788572 | 0.008861602 | 0.031612606 |
| 32837_at   | 0.007511034 | 0.185216404 | 0.853699244 | 0.919861446 |
| 33132_at   | -0.13766286 | -3.64629729 | 0.000566885 | 0.003185071 |
| 33148_at   | -0.02797625 | -0.79509556 | 0.429768448 | 0.610663895 |
| 33197_at   | 0.078749679 | 2.156797721 | 0.035137844 | 0.096559884 |
| 33304_at   | 0.135479171 | 2.402516773 | 0.019471915 | 0.06031597  |
| 33307_at   | -0.07952645 | -1.8798755  | 0.065102025 | 0.156763992 |
| 33322_i_at | 0.193323521 | 2.780588048 | 0.007285809 | 0.026910528 |
| 33323_r_at | -0.02202338 | -0.33362861 | 0.739851416 | 0.849062146 |
| 33494_at   | 0.145726271 | 3.464823631 | 0.000999153 | 0.005091693 |
| 33579_i_at | 0.025761676 | 0.604672315 | 0.547732363 | 0.711115074 |
| 336_at     | 0.059536579 | 1.638803966 | 0.106615762 | 0.22836672  |
| 33646_g_at | -0.09456451 | -2.23343446 | 0.029354093 | 0.083661319 |
| 33736_at   | -0.18893565 | -3.15564889 | 0.002528907 | 0.011106713 |
| 33760_at   | -0.09573369 | -3.11159732 | 0.002875104 | 0.012381397 |
| 33767_at   | -0.62074977 | -4.84392358 | 9.70E-06    | 0.000104121 |
| 33768_at   | 0.020587784 | 0.552354892 | 0.582807161 | 0.738638512 |
| 33778_at   | 0.033796262 | 1.103019025 | 0.274530743 | 0.450846181 |
| 33814_at   | 0.046397469 | 1.28174495  | 0.204983275 | 0.368179534 |
| 33850_at   | 0.449279237 | 7.343663724 | 7.36E-10    | 7.62E-08    |
| 34031_i_at | 0.128367391 | 1.314219314 | 0.193896509 | 0.353912789 |
| 34063_at   | 0.049725851 | 2.014880037 | 0.048515558 | 0.124519458 |
| 34187_at   | 0.029087853 | 1.280726651 | 0.205338417 | 0.368550551 |
| 34206_at   | 0.199504996 | 4.744614834 | 1.38E-05    | 0.000139849 |
| 34210_at   | -0.03991368 | -1.24500439 | 0.218088828 | 0.384594593 |
| 34221_at   | -0.07125423 | -2.39036349 | 0.020067352 | 0.061745272 |
| 34225_at   | 0.063804267 | 2.28622412  | 0.025875191 | 0.075775771 |
| 34260_at   | 0.070914172 | 2.532388677 | 0.014030538 | 0.045964874 |
| 34406_at   | 0.322863005 | 5.456664321 | 1.03E-06    | 1.63E-05    |
| 34408_at   | -0.51987819 | -6.84496114 | 5.11E-09    | 2.82E-07    |
| 34449_at   | 0.006925942 | 0.311331288 | 0.756654301 | 0.859986624 |
| 34471_at   | 0.031815917 | 1.158832028 | 0.251227963 | 0.424093677 |
| 34478_at   | -0.16842745 | -3.7386759  | 0.000422374 | 0.002481168 |
| 34689_at   | 0.088058248 | 2.433905353 | 0.01800666  | 0.056620957 |
| 34697_at   | 0.105087816 | 3.704313526 | 0.000471439 | 0.002726041 |
| 34726_at   | -0.45879793 | -6.40597791 | 2.79E-08    | 9.41E-07    |
| 34764_at   | -0.07175785 | -1.11404968 | 0.269809038 | 0.445465496 |
| 34846_at   | -0.15804894 | -5.04065452 | 4.76E-06    | 5.79E-05    |
| 34858_at   | -0.00493595 | -0.14504288 | 0.885175027 | 0.93849174  |
| 34868_at   | 0.077640895 | 2.473379053 | 0.016304968 | 0.052091044 |
| 35147_at   | -0.0463575  | -0.8846232  | 0.379977313 | 0.562632809 |
| 35148_at   | -0.01749983 | -0.44706813 | 0.65647488  | 0.792151788 |
| 35150_at   | 0.047630787 | 1.671920093 | 0.099875155 | 0.217398229 |
| 35156_at   | 0.079196209 | 1.919926333 | 0.059741981 | 0.146533595 |
| 35160_at   | -0.02545777 | -0.97536519 | 0.333390751 | 0.516085326 |
| 35179_at   | -0.056623   | -1.77690798 | 0.080776625 | 0.185065307 |
| 35201_at   | -0.04838461 | -1.17214136 | 0.245886383 | 0.417330784 |
| 35254_at   | 0.137584992 | 5.567454326 | 6.79E-07    | 1.16E-05    |
| 35265_at   | -0.08617685 | -2.16475111 | 0.034494382 | 0.095185411 |
| 35436_at   | 8.89E-05    | 0.002026167 | 0.99839024  | 0.999150356 |
| 35617_at   | -0.01103864 | -0.41423746 | 0.680213461 | 0.808427295 |
| 35626_at   | 0.129472989 | 2.96798776  | 0.004336445 | 0.017542035 |
| 35666_at   | 0.0555404   | 1.48025611  | 0.14416461  | 0.285992223 |
| 35671_at   | 0.020956153 | 0.441284347 | 0.660632054 | 0.794921322 |
| 35685_at   | 0.074853786 | 2.33171212  | 0.023176068 | 0.069408619 |
| 35776_at   | 0.458896191 | 5.85846842  | 2.27E-07    | 4.76E-06    |
| 35820_at   | 0.094191121 | 2.520849692 | 0.01445131  | 0.047094789 |
| 35846_at   | -0.12152209 | -2.33462577 | 0.023012047 | 0.069000631 |
| 35974_at   | 0.020300217 | 0.957967518 | 0.342017155 | 0.524971361 |
| 36004_at   | -0.03321124 | -1.17137563 | 0.246191472 | 0.41770583  |
| 36019_at   | 0.016448817 | 0.466976506 | 0.642249344 | 0.782585974 |
| 36030_at   | 0.0659987   | 1.466672369 | 0.147814553 | 0.291185612 |
| 36084_at   | -0.08170188 | -3.18613479 | 0.002312648 | 0.010297588 |
| 36129_at   | -0.22283838 | -4.79054985 | 1.17E-05    | 0.00012183  |
| 36475_at   | -0.00034848 | -0.01331523 | 0.989421551 | 0.995026494 |
| 36499_at   | -0.09640377 | -1.96114921 | 0.05462189  | 0.136775073 |
| 36545_s_at | 0.061085247 | 1.162272559 | 0.249839241 | 0.422243811 |
| 36552_at   | 0.127500839 | 4.41014801  | 4.48E-05    | 0.000375572 |
| 36553_at   | 0.025626314 | 0.29061896  | 0.772369402 | 0.869777921 |
| 36554_at   | -0.23390607 | -2.12204776 | 0.038074056 | 0.102828481 |

|            |             |             |             |             |
|------------|-------------|-------------|-------------|-------------|
| 36564_at   | -0.07993773 | -2.22302615 | 0.03008681  | 0.085327137 |
| 36566_at   | 0.128944321 | 4.793151854 | 1.16E-05    | 0.000120982 |
| 36612_at   | -0.01551809 | -0.32116981 | 0.749225057 | 0.855371334 |
| 36711_at   | 0.981180958 | 3.045840251 | 0.003475251 | 0.0145635   |
| 36742_at   | 0.02772451  | 0.836423002 | 0.406316813 | 0.588639798 |
| 36829_at   | 0.098767344 | 2.219314042 | 0.030352007 | 0.085891971 |
| 36830_at   | 0.076187022 | 1.86558108  | 0.067111135 | 0.160537968 |
| 36865_at   | 0.036768578 | 1.50171411  | 0.13854371  | 0.277908236 |
| 36888_at   | 0.076440126 | 2.35982779  | 0.021635939 | 0.065636261 |
| 36907_at   | 0.084687158 | 2.946753756 | 0.004603665 | 0.018426204 |
| 36920_at   | 0.14410559  | 3.257864269 | 0.001870387 | 0.008628336 |
| 36936_at   | 0.035210262 | 1.281300444 | 0.205138245 | 0.368357043 |
| 36994_at   | -0.37632681 | -5.50086884 | 8.71E-07    | 1.43E-05    |
| 37004_at   | 0.009619055 | 0.353647089 | 0.724873306 | 0.839210366 |
| 37005_at   | 0.016159145 | 0.429539768 | 0.669106646 | 0.800690804 |
| 37012_at   | 0.110820338 | 2.316393985 | 0.024055625 | 0.071510843 |
| 37020_at   | -0.02717124 | -1.28130306 | 0.205137333 | 0.368357043 |
| 37022_at   | 0.167242023 | 4.562178218 | 2.64E-05    | 0.000241198 |
| 37028_at   | 0.063479644 | 1.265461742 | 0.210717298 | 0.375500477 |
| 37079_at   | -0.01957108 | -1.05483755 | 0.295831855 | 0.474711603 |
| 37117_at   | 0.057700314 | 2.200459075 | 0.031731066 | 0.089078192 |
| 37145_at   | 0.018179192 | 0.482942344 | 0.630937113 | 0.77454236  |
| 37152_at   | 0.056572092 | 1.9332569   | 0.058043297 | 0.143267801 |
| 37170_at   | 0.167133756 | 3.659392555 | 0.00054385  | 0.003075507 |
| 37201_at   | -0.07308995 | -1.76815588 | 0.082243107 | 0.187444997 |
| 37226_at   | 0.005448874 | 0.224020372 | 0.823521112 | 0.901901723 |
| 37232_at   | -0.00119311 | -0.0435435  | 0.965416412 | 0.982402396 |
| 37254_at   | 0.054294759 | 1.660860671 | 0.102086391 | 0.221123686 |
| 37278_at   | 0.084509488 | 3.492507125 | 0.000917313 | 0.004743481 |
| 37384_at   | 0.082747012 | 2.608430039 | 0.011524169 | 0.039166399 |
| 37408_at   | 0.194710573 | 5.167488609 | 3.00E-06    | 3.95E-05    |
| 37424_at   | 0.038213781 | 2.033164099 | 0.04657624  | 0.120678608 |
| 37425_g_at | -0.00667906 | -0.26668017 | 0.790652159 | 0.880725019 |
| 37433_at   | -0.01559531 | -0.62461003 | 0.534652903 | 0.701218088 |
| 37462_i_at | 0.109394197 | 2.884442019 | 0.005478668 | 0.021238449 |
| 37512_at   | -0.01606568 | -0.1906322  | 0.849473035 | 0.917379503 |
| 37547_at   | 0.01909456  | 0.509687037 | 0.612186069 | 0.76076195  |
| 37549_g_at | 0.108127742 | 2.651077217 | 0.010303923 | 0.035722825 |
| 37566_at   | -0.22562233 | -4.28435362 | 6.91E-05    | 0.000539872 |
| 37577_at   | 0.120687805 | 4.98969755  | 5.73E-06    | 6.73E-05    |
| 37586_at   | 0.001793953 | 0.074433089 | 0.940919435 | 0.96917586  |
| 37590_g_at | 0.188897347 | 2.387098577 | 0.020230066 | 0.062164611 |
| 37652_at   | -0.08688732 | -2.11651284 | 0.038560976 | 0.103817507 |
| 37793_r_at | -0.02660486 | -0.47593    | 0.635894842 | 0.778059801 |
| 37796_at   | 0.14627056  | 3.595907116 | 0.000664515 | 0.003635955 |
| 37802_r_at | -0.00896905 | -0.4853126  | 0.629265173 | 0.773441851 |
| 37831_at   | -0.00947781 | -0.32085746 | 0.749460553 | 0.855567783 |
| 37860_at   | 0.096667421 | 3.861120649 | 0.000284332 | 0.00177999  |
| 37872_at   | 0.060539995 | 1.915353629 | 0.060334332 | 0.147718964 |
| 37892_at   | 0.096059872 | 1.233110571 | 0.222461094 | 0.389555333 |
| 37943_at   | 0.107941933 | 4.896555918 | 8.03E-06    | 8.89E-05    |
| 37950_at   | -0.06480653 | -2.8066722  | 0.006786395 | 0.025378399 |
| 37953_s_at | -0.07046177 | -1.4357201  | 0.156401749 | 0.303107123 |
| 37965_at   | -0.01223919 | -0.3049675  | 0.761472078 | 0.862654249 |
| 37966_at   | -0.01741159 | -0.43247974 | 0.666981123 | 0.799498825 |
| 37986_at   | 0.104144893 | 3.584079113 | 0.000689652 | 0.003750541 |
| 37996_s_at | 0.093366626 | 1.929790755 | 0.058480972 | 0.144033484 |
| 38037_at   | 0.028437814 | 0.701305797 | 0.485889582 | 0.660704573 |
| 38043_at   | 0.163377463 | 4.825370405 | 1.04E-05    | 0.000110048 |
| 38069_at   | 0.133476864 | 5.067658655 | 4.32E-06    | 5.34E-05    |
| 38149_at   | 0.033304881 | 0.79951535  | 0.42722251  | 0.608458522 |
| 38157_at   | -0.00611343 | -0.21271692 | 0.832286435 | 0.907299201 |
| 38158_at   | -0.03801454 | -1.16340178 | 0.249384649 | 0.421804593 |
| 38241_at   | 0.140971477 | 3.24525899  | 0.001941843 | 0.008890066 |
| 38269_at   | 0.207414061 | 5.710427154 | 3.97E-07    | 7.52E-06    |
| 38290_at   | -0.96721641 | -8.4583203  | 9.75E-12    | 5.38E-09    |
| 38340_at   | 0.408672316 | 7.141702192 | 1.61E-09    | 1.27E-07    |
| 38398_at   | -0.01634206 | -0.57949767 | 0.564475974 | 0.724971557 |
| 38447_at   | 0.010391086 | 0.32552909  | 0.745940853 | 0.853016442 |
| 38487_at   | 0.136152295 | 1.888228872 | 0.063951669 | 0.15467138  |
| 38521_at   | 0.138094255 | 3.596385672 | 0.000663516 | 0.003631383 |
| 38671_at   | 0.409879794 | 6.646498694 | 1.10E-08    | 4.80E-07    |
| 38691_s_at | 0.052265758 | 1.586204813 | 0.118077907 | 0.246675913 |
| 38703_at   | -0.00050875 | -0.02191436 | 0.982590766 | 0.991442135 |
| 38707_r_at | -0.03202731 | -0.95009687 | 0.345967416 | 0.529066749 |



|            |             |             |             |             |
|------------|-------------|-------------|-------------|-------------|
| 38710_at   | -0.27780595 | -5.53831241 | 7.57E-07    | 1.27E-05    |
| 38766_at   | 0.087006306 | 3.361011514 | 0.001372064 | 0.006642144 |
| 38892_at   | 0.1959798   | 4.031628725 | 0.000162182 | 0.001104206 |
| 38918_at   | 0.217782598 | 5.756688925 | 3.33E-07    | 6.52E-06    |
| 38964_r_at | 0.080302906 | 2.657051241 | 0.010142742 | 0.035277775 |
| 39248_at   | 0.032978551 | 1.742734687 | 0.086628642 | 0.195239903 |
| 39249_at   | -0.00927659 | -0.2468231  | 0.805908274 | 0.890732333 |
| 39313_at   | 0.267853172 | 3.797060858 | 0.000350018 | 0.002116205 |
| 39318_at   | -0.00556148 | -0.16548684 | 0.86913073  | 0.929166893 |
| 39402_at   | 0.061444427 | 0.922769804 | 0.359913242 | 0.543053431 |
| 39548_at   | -0.21260903 | -6.83855384 | 5.24E-09    | 2.86E-07    |
| 39549_at   | -0.38228251 | -5.46375775 | 1.00E-06    | 1.60E-05    |
| 39582_at   | -0.30856752 | -5.59129694 | 6.21E-07    | 1.08E-05    |
| 396_f_at   | -0.05476431 | -1.23544228 | 0.221598904 | 0.388532687 |
| 39650_s_at | -0.11581827 | -2.75198452 | 0.007872188 | 0.028701569 |
| 39705_at   | -0.10299387 | -2.60713051 | 0.011563337 | 0.039273264 |
| 39729_at   | 0.043580207 | 0.638840004 | 0.525417642 | 0.69380899  |
| 39763_at   | -0.00044608 | -0.01322701 | 0.989491636 | 0.995057832 |
| 39817_s_at | -0.0496953  | -0.95638996 | 0.342806549 | 0.525722873 |
| 39835_at   | -0.14514586 | -2.62942602 | 0.010907863 | 0.037393127 |
| 39854_r_at | -0.09260836 | -2.66597459 | 0.009906272 | 0.034618495 |
| 39891_at   | -0.02182852 | -1.00192746 | 0.320500402 | 0.502290001 |
| 39966_at   | -0.26952584 | -2.70297983 | 0.008978445 | 0.031963093 |
| 40016_g_at | 0.474166211 | 7.662367905 | 2.13E-10    | 3.39E-08    |
| 40020_at   | -0.14074093 | -2.6442091  | 0.010492114 | 0.036257138 |
| 40093_at   | 0.134740942 | 2.617271926 | 0.011260863 | 0.038398293 |
| 40148_at   | 0.001031086 | 0.037330882 | 0.970348139 | 0.984986202 |
| 40149_at   | 0.063577679 | 2.48860689  | 0.015688222 | 0.050463368 |
| 40189_at   | 0.018927529 | 0.360639    | 0.719666855 | 0.835838525 |
| 40225_at   | 0.078725141 | 2.027233351 | 0.047197828 | 0.121912875 |
| 40255_at   | -0.04678048 | -1.77877854 | 0.08046604  | 0.184567031 |
| 40273_at   | 0.126868463 | 3.462557999 | 0.001006149 | 0.005120805 |
| 40284_at   | -0.00209276 | -0.095924   | 0.92390841  | 0.960185392 |
| 40359_at   | -0.02600985 | -0.80474432 | 0.424222132 | 0.605744419 |
| 40420_at   | 0.151263536 | 4.757501837 | 1.32E-05    | 0.000134533 |
| 40446_at   | 0.109646242 | 3.198742859 | 0.002228391 | 0.009989094 |
| 40465_at   | 0.233022507 | 5.182838138 | 2.83E-06    | 3.76E-05    |
| 40472_at   | -0.77750035 | -7.26510145 | 9.99E-10    | 9.34E-08    |
| 40489_at   | -0.00205045 | -0.03914206 | 0.96891025  | 0.984282786 |
| 40524_at   | 0.100361832 | 3.544136771 | 0.000781408 | 0.004153011 |
| 40560_at   | 0.066631708 | 2.592343591 | 0.012017627 | 0.040535228 |
| 40562_at   | 0.035484913 | 0.932413964 | 0.354950709 | 0.538072623 |
| 40569_at   | 0.078629917 | 1.748351128 | 0.085643404 | 0.193526898 |
| 40612_at   | -0.05801611 | -1.83683395 | 0.071310351 | 0.168002225 |
| 40640_at   | 0.020557547 | 0.644789296 | 0.521581508 | 0.690416159 |
| 40665_at   | 0.035941979 | 1.67024479  | 0.100207578 | 0.21792206  |
| 40687_at   | 0.106337247 | 3.187283403 | 0.00230485  | 0.010265933 |
| 40829_at   | -0.02277828 | -0.83324724 | 0.408090667 | 0.590258198 |
| 40837_at   | -0.02650975 | -0.835724   | 0.406706844 | 0.589076376 |
| 40850_at   | -0.17720234 | -4.61864229 | 2.16E-05    | 0.000204115 |
| 41037_at   | 0.095674205 | 2.327422069 | 0.023419466 | 0.07001242  |
| 41047_at   | -0.24897991 | -4.59724847 | 2.33E-05    | 0.000217214 |
| 41113_at   | 0.035508709 | 1.405521696 | 0.165149039 | 0.315703873 |
| 41160_at   | 0.071480872 | 1.85161383  | 0.069124579 | 0.164168121 |
| 41220_at   | 0.271225694 | 5.876056519 | 2.12E-07    | 4.52E-06    |
| 41329_at   | 0.043746594 | 1.360922712 | 0.178752138 | 0.334342955 |
| 41386_i_at | 0.154107439 | 4.552405441 | 2.73E-05    | 0.000248211 |
| 41387_r_at | -0.03358564 | -0.96852887 | 0.336763128 | 0.519507068 |
| 41397_at   | -0.000881   | -0.0305236  | 0.975753252 | 0.987834679 |
| 41469_at   | -0.01439321 | -0.44404926 | 0.658643383 | 0.793703726 |
| 41512_at   | 0.181955699 | 3.464097971 | 0.001001389 | 0.005100761 |
| 41553_at   | -0.00807104 | -0.37085655 | 0.712082461 | 0.830858923 |
| 41577_at   | -0.74326927 | -7.53313119 | 3.52E-10    | 4.68E-08    |
| 41644_at   | 0.414105954 | 6.838381742 | 5.24E-09    | 2.86E-07    |
| 41657_at   | 0.026769397 | 0.972523156 | 0.334790011 | 0.517588044 |
| 41660_at   | 0.041322343 | 1.379161728 | 0.173089103 | 0.326648855 |
| 41856_at   | 0.034656403 | 1.024760592 | 0.309690314 | 0.490282661 |
| 41858_at   | 0.068111975 | 1.967995547 | 0.053808952 | 0.135125564 |
| 42361_g_at | 0.06887478  | 3.677081454 | 0.000514151 | 0.002932417 |
| 43427_at   | 0.586819853 | 7.711357724 | 1.76E-10    | 2.99E-08    |
| 43511_s_at | -0.25475812 | -3.73130413 | 0.000432469 | 0.002532815 |
| 43544_at   | 0.309245059 | 4.026963187 | 0.000164718 | 0.001117725 |
| 43934_at   | -0.12971593 | -3.18956654 | 0.002289423 | 0.010210448 |
| 43977_at   | 0.115425431 | 4.475554138 | 3.57E-05    | 0.000311545 |
| 44040_at   | -0.57359174 | -6.44389222 | 2.41E-08    | 8.43E-07    |

|            |             |             |             |             |
|------------|-------------|-------------|-------------|-------------|
| 44065_at   | -0.14247087 | -5.04704045 | 4.65E-06    | 5.69E-05    |
| 44111_at   | -0.00810825 | -0.27204725 | 0.786542467 | 0.878279666 |
| 44120_at   | -0.00092256 | -0.03293939 | 0.973834921 | 0.986728718 |
| 44146_at   | 0.023300726 | 0.931634756 | 0.355350009 | 0.53845117  |
| 44563_at   | 0.130169271 | 3.815487055 | 0.000329764 | 0.002015289 |
| 44617_at   | 0.051138589 | 1.884815434 | 0.064419641 | 0.155514645 |
| 44654_at   | 0.225236669 | 6.456608036 | 2.30E-08    | 8.16E-07    |
| 44669_at   | -0.06073634 | -1.93876548 | 0.057353467 | 0.141984221 |
| 44673_at   | 0.025582854 | 0.737933545 | 0.463501462 | 0.641384876 |
| 44696_at   | 0.013896212 | 0.371020338 | 0.711961116 | 0.830804099 |
| 44702_at   | 0.123738055 | 3.061231809 | 0.003325111 | 0.014016721 |
| 44783_s_at | -0.35755717 | -5.7677042  | 3.19E-07    | 6.30E-06    |
| 44790_s_at | 0.009086288 | 0.376331979 | 0.70803003  | 0.827967924 |
| 44822_s_at | 0.072699616 | 2.120145944 | 0.038240755 | 0.103191391 |
| 45288_at   | 0.088404178 | 1.59402658  | 0.116313143 | 0.243883595 |
| 45297_at   | 0.146757927 | 3.002767156 | 0.003929717 | 0.016160005 |
| 45526_g_at | 0.021905834 | 0.888594876 | 0.377855994 | 0.560401542 |
| 45572_s_at | 0.118872528 | 3.156542992 | 0.002522303 | 0.011083155 |
| 45633_at   | -0.00190747 | -0.06838307 | 0.945713639 | 0.972052941 |
| 45653_at   | -0.31374503 | -4.5951604  | 2.35E-05    | 0.000218507 |
| 45687_at   | 0.075979784 | 2.667619228 | 0.009863243 | 0.034508245 |
| 45714_at   | -0.30524232 | -4.67061623 | 1.80E-05    | 0.000174531 |
| 45749_at   | -0.20127949 | -6.82185459 | 5.59E-09    | 2.97E-07    |
| 45828_at   | 0.005268846 | 0.123434098 | 0.902185994 | 0.948016657 |
| 46142_at   | 0.114003695 | 3.994354215 | 0.000183542 | 0.001226689 |
| 46167_at   | 0.157958171 | 3.467805841 | 0.000990014 | 0.005054344 |
| 46256_at   | 0.162784613 | 5.203237149 | 2.63E-06    | 3.55E-05    |
| 46270_at   | 0.089841673 | 3.182262256 | 0.002339123 | 0.010393425 |
| 46323_at   | 0.057379236 | 1.55748609  | 0.124742954 | 0.257150005 |
| 46665_at   | 0.270286787 | 4.423801129 | 4.28E-05    | 0.000361699 |
| 46947_at   | 0.043970675 | 1.46674393  | 0.147795136 | 0.29116918  |
| 47069_at   | 0.043799368 | 0.765483003 | 0.447057957 | 0.626860171 |
| 47083_at   | 0.066210409 | 1.980284083 | 0.052375776 | 0.132299677 |
| 47105_at   | 0.041799089 | 2.057301171 | 0.044118868 | 0.115632211 |
| 47530_at   | 0.109512404 | 2.428573829 | 0.018248339 | 0.057215853 |
| 47550_at   | -0.6135311  | -7.30537452 | 8.54E-10    | 8.47E-08    |
| 47553_at   | 0.211767389 | 3.077138364 | 0.00317633  | 0.013473474 |
| 47560_at   | -0.43634635 | -6.04985558 | 1.09E-07    | 2.70E-06    |
| 47571_at   | -0.01431088 | -0.39825244 | 0.691892251 | 0.81702773  |
| 47608_at   | 0.335635399 | 5.889370035 | 2.01E-07    | 4.36E-06    |
| 47773_at   | 0.098589539 | 3.27623236  | 0.001770685 | 0.0082347   |
| 48030_i_at | 0.042735413 | 1.425072367 | 0.159443916 | 0.307586976 |
| 48031_r_at | 0.153889813 | 4.850443224 | 9.48E-06    | 0.000102131 |
| 48106_at   | 0.172456039 | 2.905104989 | 0.005172746 | 0.020267787 |
| 48117_at   | 0.067564123 | 2.781686292 | 0.007264118 | 0.02685038  |
| 48531_at   | 0.332413206 | 6.299657195 | 4.20E-08    | 1.29E-06    |
| 48580_at   | 0.084443462 | 2.96666495  | 0.004352661 | 0.017599669 |
| 48612_at   | 0.01778694  | 0.572045778 | 0.569480264 | 0.728342833 |
| 48659_at   | 0.030352004 | 1.08642045  | 0.281744388 | 0.458965561 |
| 48808_at   | 0.09861116  | 3.199150431 | 0.002225716 | 0.009979105 |
| 48825_at   | 0.070473892 | 2.754482852 | 0.007819294 | 0.028543648 |
| 49049_at   | -0.23333028 | -5.74444178 | 3.49E-07    | 6.76E-06    |
| 49051_g_at | -0.16446742 | -4.38314798 | 4.92E-05    | 0.000406236 |
| 49077_at   | -0.20812763 | -5.41691683 | 1.19E-06    | 1.84E-05    |
| 49111_at   | -0.23691117 | -3.92674837 | 0.000229394 | 0.001483015 |
| 49306_at   | 0.308017817 | 4.837382218 | 9.93E-06    | 0.000106212 |
| 49327_at   | 0.021370155 | 0.767001935 | 0.446161354 | 0.62610938  |
| 49329_at   | -0.0556677  | -1.53940451 | 0.129091493 | 0.263776852 |
| 49452_at   | 0.692709585 | 7.451515013 | 4.84E-10    | 5.71E-08    |
| 49485_at   | -0.07217197 | -2.55156523 | 0.013355736 | 0.044188225 |
| 49679_s_at | -0.02927035 | -0.93952995 | 0.351317622 | 0.53454149  |
| 49878_at   | -0.07605752 | -2.74250543 | 0.008075881 | 0.029319844 |
| 50221_at   | 0.46103992  | 8.459593549 | 9.70E-12    | 5.38E-09    |
| 50277_at   | 0.130046083 | 3.523477957 | 0.000833314 | 0.004376831 |
| 50314_i_at | -1.15997311 | -8.10115266 | 3.88E-11    | 1.25E-08    |
| 50374_at   | 0.001091998 | 0.035479229 | 0.97181826  | 0.985727566 |
| 50376_at   | 0.114700328 | 2.713269983 | 0.008734971 | 0.03124961  |
| 50400_at   | 0.080810987 | 2.689911109 | 0.00929662  | 0.032901665 |
| 50965_at   | -0.33652629 | -6.48172746 | 2.08E-08    | 7.59E-07    |
| 51146_at   | 0.167926211 | 5.51524253  | 8.26E-07    | 1.37E-05    |
| 51158_at   | -0.08473081 | -2.62876283 | 0.010926861 | 0.037449637 |
| 51176_at   | -0.03173272 | -1.06197212 | 0.292607935 | 0.471108595 |
| 51192_at   | 0.166313371 | 5.594464305 | 6.14E-07    | 1.07E-05    |
| 51200_at   | -0.03248429 | -0.77329382 | 0.442458552 | 0.622794797 |
| 51226_at   | -0.02575305 | -0.62605194 | 0.533713287 | 0.700489903 |

|            |             |             |             |             |
|------------|-------------|-------------|-------------|-------------|
| 51228_at   | 0.112622562 | 2.280811912 | 0.026214222 | 0.076567937 |
| 51774_s_at | 0.065921608 | 2.205665025 | 0.031344898 | 0.088184703 |
| 52005_at   | -0.05961969 | -1.62442475 | 0.10965557  | 0.233379054 |
| 52078_at   | 0.07945372  | 3.310178194 | 0.00159948  | 0.00755964  |
| 52159_at   | 0.117725515 | 3.86456419  | 0.000281159 | 0.001762629 |
| 52164_at   | -0.01203557 | -0.26034394 | 0.795511644 | 0.883897431 |
| 52169_at   | 0.140984052 | 4.776502525 | 1.24E-05    | 0.000127043 |
| 52255_s_at | -0.04019572 | -0.60518006 | 0.547397268 | 0.710939064 |
| 52285_f_at | -0.08589888 | -2.67325963 | 0.009716965 | 0.034100556 |
| 52651_at   | 0.050781527 | 1.858465857 | 0.068130555 | 0.162381586 |
| 52731_at   | -0.08790792 | -2.68957564 | 0.009304921 | 0.032923407 |
| 52741_at   | -0.02016726 | -0.56494196 | 0.57427094  | 0.732074687 |
| 52837_at   | -0.0864053  | -2.18967181 | 0.032544588 | 0.090861068 |
| 52940_at   | 0.076167587 | 1.845267078 | 0.070056177 | 0.165816686 |
| 52975_at   | 0.206703138 | 3.892799643 | 0.000256396 | 0.001627681 |
| 53071_s_at | 0.324777412 | 3.949537031 | 0.000212827 | 0.001388765 |
| 53076_at   | 0.017217213 | 0.721883189 | 0.473238722 | 0.649268732 |
| 53202_at   | 0.037135715 | 1.832541998 | 0.071955865 | 0.169237529 |
| 53720_at   | -0.02060891 | -0.79400999 | 0.430395148 | 0.611262869 |
| 53912_at   | 0.023689379 | 1.120428228 | 0.267104899 | 0.442422806 |
| 53968_at   | 0.098473094 | 2.935774849 | 0.004747753 | 0.018899669 |
| 53987_at   | 0.055943517 | 2.195101688 | 0.032132831 | 0.090008179 |
| 53991_at   | 0.187741498 | 5.645206306 | 5.07E-07    | 9.15E-06    |
| 54037_at   | 0.034495856 | 1.486256042 | 0.142575164 | 0.283665104 |
| 54051_at   | 0.024725005 | 1.157631041 | 0.251714023 | 0.42462549  |
| 54632_at   | 0.112052934 | 3.923143886 | 0.000232126 | 0.001498291 |
| 54970_at   | -0.07492175 | -1.76305775 | 0.083107498 | 0.189004094 |
| 55065_at   | -0.42517019 | -6.05284269 | 1.08E-07    | 2.68E-06    |
| 55081_at   | 0.112066295 | 2.919282132 | 0.004972089 | 0.019631825 |
| 55093_at   | 0.060121352 | 1.936578455 | 0.057626503 | 0.142487767 |
| 55583_at   | 0.085485407 | 3.194597055 | 0.002255773 | 0.010093614 |
| 55616_at   | 0.053912192 | 1.540619568 | 0.128795539 | 0.263317943 |
| 55662_at   | 0.060471165 | 1.580090534 | 0.119472374 | 0.248647636 |
| 55692_at   | -0.04233734 | -0.65818688 | 0.512997104 | 0.683628522 |
| 55705_at   | -0.07296732 | -2.74429695 | 0.008037017 | 0.029213548 |
| 55872_at   | -0.11886994 | -2.56424963 | 0.012925696 | 0.043000983 |
| 56197_at   | 0.126049097 | 4.243704814 | 7.94E-05    | 0.000607364 |
| 56256_at   | 0.07084438  | 1.570253756 | 0.121743564 | 0.252246794 |
| 564_at     | 0.016138156 | 0.371700757 | 0.711457104 | 0.830421867 |
| 56748_at   | -0.01765434 | -0.72729052 | 0.469945422 | 0.646657865 |
| 56821_at   | -0.02659868 | -0.68461177 | 0.496289369 | 0.669407994 |
| 56829_at   | -0.0138789  | -0.49074668 | 0.625439422 | 0.770477098 |
| 56919_at   | 0.081676531 | 2.385620058 | 0.020304139 | 0.062341675 |
| 57082_at   | 0.142963503 | 3.45966564  | 0.001015149 | 0.005160848 |
| 57163_at   | 0.243632786 | 2.1682087   | 0.034217884 | 0.094581128 |
| 57516_at   | 0.056963823 | 2.903290193 | 0.005198967 | 0.020340735 |
| 57532_at   | 0.188699698 | 5.29709138  | 1.86E-06    | 2.67E-05    |
| 57539_at   | -0.03105208 | -0.94851923 | 0.3467628   | 0.529811735 |
| 57540_at   | 0.03248866  | 0.814451281 | 0.418685901 | 0.601127932 |
| 57588_at   | -0.33174644 | -4.84596758 | 9.63E-06    | 0.000103558 |
| 57703_at   | 0.004004903 | 0.154361718 | 0.87785525  | 0.934650124 |
| 57715_at   | 0.058624852 | 1.702689522 | 0.093928566 | 0.207619342 |
| 57739_at   | 0.09492087  | 1.639192319 | 0.106534622 | 0.228225738 |
| 58308_at   | 0.082591898 | 1.886462664 | 0.06419345  | 0.155136196 |
| 58367_s_at | 0.032495861 | 1.049773315 | 0.298134994 | 0.477266219 |
| 58696_at   | -0.07588479 | -2.77650178 | 0.007367043 | 0.027156704 |
| 58780_s_at | 0.511743884 | 7.849474333 | 1.03E-10    | 2.14E-08    |
| 58900_at   | 0.061733304 | 2.236210455 | 0.02916135  | 0.083239386 |
| 58916_at   | 0.060079492 | 1.867536925 | 0.066833182 | 0.160010103 |
| 58994_at   | 0.216896443 | 2.755334845 | 0.00780133  | 0.028487381 |
| 59375_at   | 0.262151557 | 5.042701932 | 4.73E-06    | 5.76E-05    |
| 59433_at   | -0.06738655 | -1.38213261 | 0.172179844 | 0.325415507 |
| 59437_at   | 0.128247831 | 1.943027266 | 0.056824579 | 0.140987293 |
| 59625_at   | 0.264979274 | 6.74693777  | 7.47E-09    | 3.64E-07    |
| 59631_at   | 0.064298061 | 2.913204179 | 0.005057213 | 0.019903042 |
| 59644_at   | 0.129850165 | 2.024746754 | 0.047460564 | 0.122451652 |
| 59697_at   | -0.47214936 | -7.16125622 | 1.50E-09    | 1.20E-07    |
| 59705_at   | 0.036401533 | 2.009066438 | 0.049146585 | 0.125777883 |
| 59999_at   | 0.078601852 | 3.148909882 | 0.002579206 | 0.011296539 |
| 60084_at   | 0.031060205 | 1.431324996 | 0.157651958 | 0.304985772 |
| 60471_at   | 0.25598179  | 6.268232213 | 4.74E-08    | 1.41E-06    |
| 60474_at   | 0.026816144 | 1.004022473 | 0.319498121 | 0.501053057 |
| 60528_at   | 0.11713746  | 2.853905196 | 0.005961544 | 0.022783764 |
| 60794_f_at | -0.03928405 | -1.44655826 | 0.153351747 | 0.298931625 |
| 60815_at   | 0.030848456 | 0.80750587  | 0.422642666 | 0.604540482 |

|            |             |             |             |             |
|------------|-------------|-------------|-------------|-------------|
| 61297_at   | 0.123019459 | 3.593483666 | 0.000669593 | 0.003657921 |
| 61732_r_at | 0.050844591 | 2.569296366 | 0.012758119 | 0.042538484 |
| 61734_at   | 0.066060855 | 1.633906439 | 0.107643328 | 0.230212695 |
| 61874_at   | 0.136222114 | 5.320941073 | 1.70E-06    | 2.49E-05    |
| 62212_at   | -0.00105654 | -0.0336798  | 0.97324701  | 0.986490868 |
| 62987_r_at | -0.18051309 | -5.02335347 | 5.07E-06    | 6.10E-05    |
| 63009_at   | -0.01040436 | -0.42040249 | 0.675729986 | 0.805175688 |
| 632_at     | -0.09954374 | -2.71746768 | 0.008637399 | 0.030986954 |
| 63305_at   | -0.05487691 | -0.91274229 | 0.365120194 | 0.548502579 |
| 635_s_at   | -0.31412049 | -5.12976245 | 3.44E-06    | 4.43E-05    |
| 63825_at   | -0.057318   | -1.14904707 | 0.255207697 | 0.428465154 |
| 64064_at   | 0.10111305  | 2.782955143 | 0.00723913  | 0.026773519 |
| 64371_at   | -0.01948918 | -0.58461612 | 0.561051325 | 0.72250413  |
| 64408_s_at | 0.077249991 | 2.614994099 | 0.011328166 | 0.038591235 |
| 64418_at   | 0.119920112 | 3.817759515 | 0.000327345 | 0.002002151 |
| 64432_at   | -0.01424647 | -0.33538897 | 0.738530124 | 0.848297008 |
| 64438_at   | 0.024045036 | 0.959600302 | 0.341201386 | 0.524127736 |
| 64440_at   | 0.082622546 | 2.76453842  | 0.007609685 | 0.027894689 |
| 64474_g_at | 0.105774826 | 3.852302495 | 0.000292614 | 0.001823665 |
| 64486_at   | 0.162585376 | 4.94836323  | 6.66E-06    | 7.64E-05    |
| 64488_at   | 0.034699924 | 1.343385442 | 0.184329566 | 0.341601301 |
| 64883_at   | 0.019371795 | 0.319535323 | 0.750457655 | 0.856341049 |
| 64899_at   | -0.24534835 | -4.75999397 | 1.31E-05    | 0.000133559 |
| 64900_at   | 0.291898482 | 2.525181041 | 0.014292046 | 0.046633578 |
| 64942_at   | -0.0148546  | -0.48482415 | 0.629609557 | 0.773694914 |
| 65086_at   | 0.059930844 | 2.530040419 | 0.014115258 | 0.046178107 |
| 65133_i_at | -0.23104821 | -5.31530059 | 1.74E-06    | 2.53E-05    |
| 65438_at   | -0.0036177  | -0.14516818 | 0.885076543 | 0.938461191 |
| 65472_at   | 0.049161978 | 2.625112952 | 0.011031959 | 0.037743268 |
| 65493_at   | 0.077555609 | 2.151051944 | 0.035609217 | 0.097580913 |
| 65517_at   | -0.02981718 | -0.88477626 | 0.379895424 | 0.562586112 |
| 65521_at   | -0.01530801 | -0.49348566 | 0.623515004 | 0.7689118   |
| 65585_at   | -0.08782663 | -1.78728938 | 0.079065448 | 0.181954528 |
| 65588_at   | 0.078429779 | 1.575668498 | 0.120489119 | 0.250297468 |
| 65591_at   | -0.0780508  | -1.39123427 | 0.169417035 | 0.321579364 |
| 65630_at   | 0.059267921 | 2.030047047 | 0.046902044 | 0.121339864 |
| 65635_at   | 0.024037958 | 0.739352903 | 0.462645924 | 0.640557999 |
| 65718_at   | 0.086212143 | 3.446638803 | 0.001056635 | 0.005333987 |
| 65770_at   | -0.00614685 | -0.23958299 | 0.811490073 | 0.894338208 |
| 65884_at   | 0.111342233 | 2.408506896 | 0.0191843   | 0.059594408 |
| 66053_at   | -0.04772156 | -1.7937002  | 0.078023926 | 0.180044426 |
| 71933_at   | 0.063733889 | 1.469666022 | 0.147003999 | 0.289959516 |
| 74694_s_at | 0.168283142 | 3.447750311 | 0.001053033 | 0.005320765 |
| 76897_s_at | -0.00535519 | -0.29214462 | 0.771208471 | 0.869014396 |
| 77508_r_at | -0.06098534 | -1.43289422 | 0.157204696 | 0.304413806 |
| 78047_s_at | -0.06280961 | -2.21680033 | 0.030532757 | 0.086299643 |
| 78330_at   | 0.009621766 | 0.252885094 | 0.801242526 | 0.887793008 |
| 78383_at   | -0.01842279 | -0.75252844 | 0.454747442 | 0.633766251 |
| 78495_at   | 0.034915643 | 1.289901508 | 0.202155112 | 0.364597105 |
| 79005_at   | -0.00843445 | -0.24423973 | 0.80789879  | 0.892063116 |
| 81737_at   | -0.02660938 | -1.05347407 | 0.296450738 | 0.47545311  |
| 81811_at   | 0.210886408 | 4.694719475 | 1.65E-05    | 0.000162523 |
| 823_at     | -0.7479909  | -7.01438329 | 2.65E-09    | 1.76E-07    |
| 87100_at   | -0.09735618 | -2.21353678 | 0.030768838 | 0.086840601 |
| 89476_r_at | -0.0314331  | -0.64108854 | 0.523966038 | 0.692567436 |
| 89948_at   | -0.03757413 | -1.28456542 | 0.204002002 | 0.366995027 |
| 89977_at   | 0.122501274 | 3.240804085 | 0.001967705 | 0.008985092 |
| 90265_at   | -0.11890534 | -2.58264856 | 0.012324227 | 0.041350927 |
| 90610_at   | 0.138371379 | 3.678415146 | 0.000511975 | 0.002923742 |
| 91580_at   | 0.000196935 | 0.008052034 | 0.993602841 | 0.997083218 |
| 91617_at   | 0.105348927 | 3.410163975 | 0.001181522 | 0.005857584 |
| 91682_at   | -0.14786412 | -5.2520745  | 2.19E-06    | 3.05E-05    |
| 91684_g_at | -0.08196586 | -2.30611085 | 0.024662611 | 0.072903062 |
| 91703_at   | 0.073981608 | 1.67078086  | 0.10010111  | 0.217741594 |
| 91816_f_at | 0.094196746 | 1.28227173  | 0.204799735 | 0.36792659  |
| 91826_at   | -0.02803291 | -0.76878508 | 0.445110133 | 0.625306072 |
| 91920_at   | 0.031460407 | 0.881152612 | 0.381837131 | 0.564582316 |
| 91952_at   | 0.024157076 | 0.802744864 | 0.425367921 | 0.606803381 |
