# Supplementary material for: Mutant huntingtin's effects on striatal gene expression in mice recapitulate changes observed in human Huntington's disease brain and do not differ with mutant huntingtin length or wild-type huntingtin dosage
Source: Oxford University Press journal article supplement (doi:10.1093/hmg/ddm133), 2007-05-21
Supplement: kuhn_hmg-2007-d-00329_tables2.pdf [file kuhn_hmg-2007-d-00329_tables2.pdf]

|       |        |      |         |        |      |         |        |      |         |        |      |         |        |       |         |          |                                                              |        |       |       |         |    |       |
|-------|--------|------|---------|--------|------|---------|--------|------|---------|--------|------|---------|--------|-------|---------|----------|--------------------------------------------------------------|--------|-------|-------|---------|----|-------|
| 94079 | 0.212  | 1579 | 146479  | 0.120  | 1277 | 146705  | 0.136  | 1271 | 141430  | 0.274  | 629  | 1372    | 513    | 34305 | TRUE    | cellular | nonreducing domain 5; kinase, eukaryotes 1                   | 200423 | 0.292 | 10044 | 1286702 | MA | FALSE |
| 94126 | -0.230 | 2299 | 1462533 | -0.117 | 2299 | 1462533 | -0.117 | 2299 | 1462533 | -0.117 | 2299 | 1462533 | -0.117 | 2299  | 1462533 | TRUE     | nonreducing domain 3                                         | 201219 | 0.175 | 3860  | 5496705 | MA | FALSE |
| 94127 | -0.285 | 464  | 1461682 | -0.197 | 1989 | 1461682 | -0.108 | 1736 | 1414885 | -0.401 | 711  | 1273    | 875    | 4272  | 674     | TRUE     | receptor of G-protein signaling 10                           | 19047  | 0.086 | 10047 | 203136  | MA | FALSE |
| 94275 | -0.332 | 171  | 1465706 | -0.130 | 1387 | 1465706 | -0.138 | 1427 | 1467926 | -0.195 | 324  | 1280    | 255    | 1309  | 2428    | TRUE     | nonreducing domain 8                                         | 200424 | 0.122 | 1234  | 5797672 | MA | FALSE |
| 94339 | 0.122  | 4178 | 1449384 | 0.235  | 4519 | 1449384 | 0.204  | 4472 | 1459729 | 0.108  | 515  | 1283    | 375    | 1390  | 2428    | TRUE     | symptotaphin 3                                               | 200425 | 0.172 | 3527  | 5202205 | MA | FALSE |
| 94360 | -0.259 | 2651 | 1421813 | -0.204 | 2651 | 1421813 | -0.204 | 2651 | 1421813 | -0.204 | 2651 | 1421813 | -0.204 | 2651  | 1421813 | TRUE     | nonreducing domain 5                                         | 200426 | 0.172 | 1445  | 1006701 | MA | FALSE |
| 94369 | 0.232  | 468  | 1427606 | 0.409  | 468  | 1427606 | 0.409  | 468  | 1427606 | 0.409  | 468  | 1427606 | 0.409  | 468   | 1427606 | TRUE     | protein domain, cell-cell channel, 5-member family, member 2 | 200703 | 0.101 | 1834  | 1516701 | MA | FALSE |
| 94383 | -0.539 | 55   | 1459239 | -0.114 | 1174 | 1459239 | -0.288 | 1174 | 1459239 | -0.288 | 1174 | 1459239 | -0.288 | 1174  | 1459239 | TRUE     | nonreducing domain 4; member 1                               | 219421 | 0.535 | 1089  | 219421  | MA | FALSE |
| 94454 | -0.224 | 1839 | 1436810 | -0.156 | 1839 | 1436810 | -0.156 | 1839 | 1436810 | -0.156 | 1839 | 1436810 | -0.156 | 1839  | 1436810 | TRUE     | nonreducing domain 1                                         | 224448 | 0.173 | 2851  | 1732675 | MA | FALSE |
| 94507 | -0.224 | 272  | 1428256 | -0.248 | 272  | 1428256 | -0.248 | 272  | 1428256 | -0.248 | 272  | 1428256 | -0.248 | 272   | 1428256 | TRUE     | nonreducing domain 1                                         | 200427 | 0.077 | 676   | 200427  | MA | FALSE |
| 94578 | -0.114 | 2293 | 1422588 | -0.265 | 2293 | 1422588 | -0.265 | 2293 | 1422588 | -0.265 | 2293 | 1422588 | -0.265 | 2293  | 1422588 | TRUE     | nonreducing domain 1                                         | 200428 | 0.027 | 3426  | 200428  | MA | FALSE |
| 94579 | -0.232 | 770  | 1448751 | -0.265 | 770  | 1448751 | -0.265 | 770  | 1448751 | -0.265 | 770  | 1448751 | -0.265 | 770   | 1448751 | TRUE     | nonreducing domain 1                                         | 200721 | 0.168 | 1607  | 200721  | MA | FALSE |
| 94584 | -0.211 | 510  | 1449707 | -0.299 | 510  | 1449707 | -0.299 | 510  | 1449707 | -0.299 | 510  | 1449707 | -0.299 | 510   | 1449707 | TRUE     | nonreducing domain 4                                         | 200429 | 0.144 | 5499  | 200429  | MA | FALSE |
| 94609 | -0.283 | 2924 | 1434264 | -0.259 | 2924 | 1434264 | -0.259 | 2924 | 1434264 | -0.259 | 2924 | 1434264 | -0.259 | 2924  | 1434264 | TRUE     | nonreducing domain 1                                         | 200722 | 0.147 | 1717  | 200722  | MA | FALSE |
| 94624 | -0.490 | 108  | 1418149 | -0.258 | 108  | 1418149 | -0.258 | 108  | 1418149 | -0.258 | 108  | 1418149 | -0.258 | 108   | 1418149 | TRUE     | nonreducing domain 1                                         | 200430 | 0.289 | 476   | 200430  | MA | FALSE |
| 94625 | -0.490 | 108  | 1418149 | -0.258 | 108  | 1418149 | -0.258 | 108  | 1418149 | -0.258 | 108  | 1418149 | -0.258 | 108   | 1418149 | TRUE     | nonreducing domain 1                                         | 200431 | 0.289 | 476   | 200431  | MA | FALSE |
| 94626 | -0.490 | 108  | 1418149 | -0.258 | 108  | 1418149 | -0.258 | 108  | 1418149 | -0.258 | 108  | 1418149 | -0.258 | 108   | 1418149 | TRUE     | nonreducing domain 1                                         | 200432 | 0.289 | 476   | 200432  | MA | FALSE |
| 94627 | -0.490 | 108  | 1418149 | -0.258 | 108  | 1418149 | -0.258 | 108  | 1418149 | -0.258 | 108  | 1418149 | -0.258 | 108   | 1418149 | TRUE     | nonreducing domain 1                                         | 200433 | 0.289 | 476   | 200433  | MA | FALSE |
| 94628 | -0.490 | 108  | 1418149 | -0.258 | 108  | 1418149 | -0.258 | 108  | 1418149 | -0.258 | 108  | 1418149 | -0.258 | 108   | 1418149 | TRUE     | nonreducing domain 1                                         | 200434 | 0.289 | 476   | 200434  | MA | FALSE |
| 94629 | -0.490 | 108  | 1418149 | -0.258 | 108  | 1418149 | -0.258 | 108  | 1418149 | -0.258 | 108  | 1418149 | -0.258 | 108   | 1418149 | TRUE     | nonreducing domain 1                                         | 200435 | 0.289 | 476   | 200435  | MA | FALSE |
| 94630 | -0.490 | 108  | 1418149 | -0.258 | 108  | 1418149 | -0.258 | 108  | 1418149 | -0.258 | 108  | 1418149 | -0.258 | 108   | 1418149 | TRUE     | nonreducing domain 1                                         | 200436 | 0.289 | 476   | 200436  | MA | FALSE |
| 94631 | -0.490 | 108  | 1418149 | -0.258 | 108  | 1418149 | -0.258 | 108  | 1418149 | -0.258 | 108  | 1418149 | -0.258 | 108   | 1418149 | TRUE     | nonreducing domain 1                                         | 200437 | 0.289 | 476   | 200437  | MA | FALSE |
| 94632 | -0.490 | 108  | 1418149 | -0.258 | 108  | 1418149 | -0.258 | 108  | 1418149 | -0.258 | 108  | 1418149 | -0.258 | 108   | 1418149 | TRUE     | nonreducing domain 1                                         | 200438 | 0.289 | 476   | 200438  | MA | FALSE |
| 94633 | -0.490 | 108  | 1418149 | -0.258 | 108  | 1418149 | -0.258 | 108  | 1418149 | -0.258 | 108  | 1418149 | -0.258 | 108   | 1418149 | TRUE     | nonreducing domain 1                                         | 200439 | 0.289 | 476   | 200439  | MA | FALSE |
| 94634 | -0.490 | 108  | 1418149 | -0.258 | 108  | 1418149 | -0.258 | 108  | 1418149 | -0.258 | 108  | 1418149 | -0.258 | 108   | 1418149 | TRUE     | nonreducing domain 1                                         | 200440 | 0.289 | 476   | 200440  | MA | FALSE |
| 94635 | -0.490 | 108  | 1418149 | -0.258 | 108  | 1418149 | -0.258 | 108  | 1418149 | -0.258 | 108  | 1418149 | -0.258 | 108   | 1418149 | TRUE     | nonreducing domain 1                                         | 200441 | 0.289 | 476   | 200441  | MA | FALSE |
| 94636 | -0.490 | 108  | 1418149 | -0.258 | 108  | 1418149 | -0.258 | 108  | 1418149 | -0.258 | 108  | 1418149 | -0.258 | 108   | 1418149 | TRUE     | nonreducing domain 1                                         | 200442 | 0.289 | 476   | 200442  | MA | FALSE |
| 94637 | -0.490 | 108  | 1418149 | -0.258 | 108  | 1418149 | -0.258 | 108  | 1418149 | -0.258 | 108  | 1418149 | -0.258 | 108   | 1418149 | TRUE     | nonreducing domain 1                                         | 200443 | 0.289 | 476   | 200443  | MA | FALSE |
| 94638 | -0.490 | 108  | 1418149 | -0.258 | 108  | 1418149 | -0.258 | 108  | 1418149 | -0.258 | 108  | 1418149 | -0.258 | 108   | 1418149 | TRUE     | nonreducing domain 1                                         | 200444 | 0.289 | 476   | 200444  | MA | FALSE |
| 94639 | -0.490 | 108  | 1418149 | -0.258 | 108  | 1418149 | -0.258 | 108  | 1418149 | -0.258 | 108  | 1418149 | -0.258 | 108   | 1418149 | TRUE     | nonreducing domain 1                                         | 200445 | 0.289 | 476   | 200445  | MA | FALSE |
| 94640 | -0.490 | 108  | 1418149 | -0.258 | 108  | 1418149 | -0.258 | 108  | 1418149 | -0.258 | 108  | 1418149 | -0.258 | 108   | 1418149 | TRUE     | nonreducing domain 1                                         | 200446 | 0.289 | 476   | 200446  | MA | FALSE |
| 94641 | -0.490 | 108  | 1418149 | -0.258 | 108  | 1418149 | -0.258 | 108  | 1418149 | -0.258 | 108  | 1418149 | -0.258 | 108   | 1418149 | TRUE     | nonreducing domain 1                                         | 200447 | 0.289 | 476   | 200447  | MA | FALSE |
| 94642 | -0.490 | 108  | 1418149 | -0.258 | 108  | 1418149 | -0.258 | 108  | 1418149 | -0.258 | 108  | 1418149 | -0.258 | 108   | 1418149 | TRUE     | nonreducing domain 1                                         | 200448 | 0.289 | 476   | 200448  | MA | FALSE |
| 94643 | -0.490 | 108  | 1418149 | -0.258 | 108  | 1418149 | -0.258 | 108  | 1418149 | -0.258 | 108  | 1418149 | -0.258 | 108   | 1418149 | TRUE     | nonreducing domain 1                                         | 200449 | 0.289 | 476   | 200449  | MA | FALSE |
| 94644 | -0.490 | 108  | 1418149 | -0.258 | 108  | 1418149 | -0.258 | 108  | 1418149 | -0.258 | 108  | 1418149 | -0.258 | 108   | 1418149 | TRUE     | nonreducing domain 1                                         | 200450 | 0.289 | 476   | 200450  | MA | FALSE |
| 94645 | -0.490 | 108  | 1418149 | -0.258 | 108  | 1418149 | -0.258 | 108  | 1418149 | -0.258 | 108  | 1418149 | -0.258 | 108   | 1418149 | TRUE     | nonreducing domain 1                                         | 200451 | 0.289 | 476   | 200451  | MA | FALSE |
| 94646 | -0.490 | 108  | 1418149 | -0.258 | 108  | 1418149 | -0.258 | 108  | 1418149 | -0.258 | 108  | 1418149 | -0.258 | 108   | 1418149 | TRUE     | nonreducing domain 1                                         | 200452 | 0.289 | 476   | 200452  | MA | FALSE |
| 94647 | -0.490 | 108  | 1418149 | -0.258 | 108  | 1418149 | -0.258 | 108  | 1418149 | -0.258 | 108  | 1418149 | -0.258 | 108   | 1418149 | TRUE     | nonreducing domain 1                                         | 200453 | 0.289 | 476   | 200453  | MA | FALSE |
| 94648 | -0.490 | 108  | 1418149 | -0.258 | 108  | 1418149 | -0.258 | 108  | 1418149 | -0.258 | 108  | 1418149 | -0.258 | 108   | 1418149 | TRUE     | nonreducing domain 1                                         | 200454 | 0.289 | 476   | 200454  | MA | FALSE |
| 94649 | -0.490 | 108  | 1418149 | -0.258 | 108  | 1418149 | -0.258 | 108  | 1418149 | -0.258 | 108  | 1418149 | -0.258 | 108   | 1418149 | TRUE     | nonreducing domain 1                                         | 200455 | 0.289 | 476   | 200455  | MA | FALSE |
| 94650 | -0.490 | 108  | 1418149 | -0.258 | 108  | 1418149 | -0.258 | 108  | 1418149 | -0.258 | 108  | 1418149 | -0.258 | 108   | 1418149 | TRUE     | nonreducing domain 1                                         | 200456 | 0.289 | 476   | 200456  | MA | FALSE |
| 94651 | -0.490 | 108  | 1418149 | -0.258 | 108  | 1418149 | -0.258 | 108  | 1418149 | -0.258 | 108  | 1418149 | -0.258 | 108   | 1418149 | TRUE     | nonreducing domain 1                                         | 200457 | 0.289 | 476   | 200457  | MA | FALSE |
| 94652 | -0.490 | 108  | 1418149 | -0.258 | 108  | 1418149 | -0.258 | 108  | 1418149 | -0.258 | 108  | 1418149 | -0.258 | 108   | 1418149 | TRUE     | nonreducing domain 1                                         | 200458 | 0.289 | 476   | 200458  | MA | FALSE |
| 94653 | -0.490 | 108  | 1418149 | -0.258 | 108  | 1418149 | -0.258 | 108  | 1418149 | -0.258 | 108  | 1418149 | -0.258 | 108   | 1418149 | TRUE     | nonreducing domain 1                                         | 200459 | 0.289 | 476   | 200459  | MA | FALSE |
| 94654 | -0.490 | 108  | 1418149 | -0.258 | 108  | 1418149 | -0.258 | 108  | 1418149 | -0.258 | 108  | 1418149 | -0.258 | 108   | 1418149 | TRUE     | nonreducing domain 1                                         | 200460 | 0.289 | 476   | 200460  | MA | FALSE |
| 94655 | -0.490 | 108  | 1418149 | -0.258 | 108  | 1418149 | -0.258 | 108  | 1418149 | -0.258 | 108  | 1418149 | -0.258 | 108   | 1418149 | TRUE     | nonreducing domain 1                                         | 200461 | 0.289 | 476   | 200461  | MA | FALSE |
| 94656 | -0.490 | 108  | 1418149 | -0.258 | 108  | 1418149 | -0.258 | 108  | 1418149 | -0.258 | 108  | 1418149 | -0.258 | 108   | 1418149 | TRUE     | nonreducing domain 1                                         | 200462 | 0.289 | 476   | 200462  | MA | FALSE |
| 94657 | -0.490 | 108  | 1418149 | -0.258 | 108  | 1418149 | -0.258 | 108  | 1418149 | -0.258 | 108  | 1418149 | -0.258 | 108   | 1418149 | TRUE     | nonreducing domain 1                                         | 200463 | 0.289 | 476   | 200463  | MA | FALSE |
| 94658 | -0.490 | 108  | 1418149 | -0.258 | 108  | 1418149 | -0.258 | 108  | 1418149 | -0.258 | 108  | 1418149 | -0.258 | 108   | 1418149 | TRUE     | nonreducing domain 1                                         | 200464 | 0.289 | 476   | 200464  | MA | FALSE |
| 94659 | -0.490 | 108  | 1418149 | -0.258 | 108  | 1418149 | -0.258 | 108  | 1418149 | -0.258 | 108  | 1418149 | -0.258 | 108   | 1418149 | TRUE     | nonreducing domain 1                                         | 200465 | 0.289 | 476   | 200465  | MA | FALSE |
| 94660 | -0.490 | 108  | 1418149 | -0.258 | 108  | 1418149 | -0.258 | 108  | 1418149 | -0.258 | 108  | 1418149 | -0.258 | 108   | 1418149 | TRUE     | nonreducing domain 1                                         | 200466 | 0.289 | 476   | 200466  | MA | FALSE |
| 94661 | -0.490 | 108  | 1418149 | -0.258 | 108  | 1418149 | -0.258 | 108  | 1418149 | -0.258 | 108  | 1418149 | -0.258 | 108   | 1418149 | TRUE     | nonreducing domain 1                                         | 200467 | 0.289 | 476   | 200467  | MA | FALSE |
| 94662 | -0.490 | 108  | 1418149 | -0.258 | 108  | 1418149 | -0.    |      |         |        |      |         |        |       |         |          |                                                              |        |       |       |         |    |       |







|        |        |        |         |        |        |         |        |        |         |        |        |         |       |                       |        |                       |                       |           |        |           |           |      |
|--------|--------|--------|---------|--------|--------|---------|--------|--------|---------|--------|--------|---------|-------|-----------------------|--------|-----------------------|-----------------------|-----------|--------|-----------|-----------|------|
| 102083 | 0-140  | 6121   | 1418360 | -0.202 | 71.5   | 100381  | -0.202 | 288    | 1413030 | -0.255 | 1983   | 2164    | 125   | 288                   | 9165   | TRUE                  | zfp flavin protein 1b | 220071    | -0.448 | 925       | 1.626E-04 | TRUE |
| 101466 | -0.150 | 1759   | 1425331 | -0.288 | 1529   | 95792   | -0.191 | 3016   | 6431680 | -0.191 | 3016   | 2172    | 625   | 6431680               | TRUE   | zfp flavin protein 1b | 220071                | -0.448    | 925    | 1.626E-04 | TRUE      |      |
| 100004 | -0.324 | 191    | 1415001 | -0.695 | 480    | 100004  | -0.114 | 4704   | 1415801 | -0.114 | 4704   | 1415801 | TRUE  | zfp flavin protein 1b | 220071 | -0.448                | 925                   | 1.626E-04 | TRUE   |           |           |      |
| 152092 | -0.102 | 2910   | 1422669 | -0.257 | 341.5  | 1622669 | -0.257 | 2176   | 2174    | 625    | 129734 | 152092  | FALSE | zfp flavin protein 1b | 220071 | -0.448                | 925                   | 1.626E-04 | TRUE   |           |           |      |
| 90805  | -0.085 | 3021   | 1427208 | -0.139 | 280.5  | 102799  | -0.472 | 1159   | 1427208 | -0.472 | 1159   | 1427208 | TRUE  | zfp flavin protein 1b | 220071 | -0.448                | 925                   | 1.626E-04 | TRUE   |           |           |      |
| 96217  | -0.152 | 2070   | 1414229 | -0.275 | 1406   | 96217   | -0.275 | 1406   | 96217   | -0.275 | 1406   | 96217   | TRUE  | zfp flavin protein 1b | 220071 | -0.448                | 925                   | 1.626E-04 | TRUE   |           |           |      |
| 161587 | -0.270 | 2521   | 1416668 | -0.304 | 775    | 161587  | -0.304 | 775    | 161587  | -0.304 | 775    | 161587  | TRUE  | zfp flavin protein 1b | 220071 | -0.448                | 925                   | 1.626E-04 | TRUE   |           |           |      |
| 99364  | -0.231 | 5489   | 1424906 | -0.204 | 4842   | 99364   | -0.204 | 4842   | 99364   | -0.204 | 4842   | 99364   | TRUE  | zfp flavin protein 1b | 220071 | -0.448                | 925                   | 1.626E-04 | TRUE   |           |           |      |
| 146059 | -0.109 | 4023   | 1427289 | -0.188 | 1196.5 | 160535  | -0.188 | 1196.5 | 160535  | -0.188 | 1196.5 | 160535  | TRUE  | zfp flavin protein 1b | 220071 | -0.448                | 925                   | 1.626E-04 | TRUE   |           |           |      |
| 140459 | -0.158 | 9951   | 1415171 | -0.104 | 2980   | 160454  | -0.104 | 2980   | 160454  | -0.104 | 2980   | 160454  | TRUE  | zfp flavin protein 1b | 220071 | -0.448                | 925                   | 1.626E-04 | TRUE   |           |           |      |
| 101869 | -0.401 | 4023   | 1427289 | -0.385 | 1807   | 1423786 | -0.385 | 1807   | 1423786 | -0.385 | 1807   | 1423786 | TRUE  | zfp flavin protein 1b | 220071 | -0.448                | 925                   | 1.626E-04 | TRUE   |           |           |      |
| 102059 | -0.040 | 6433   | 1449271 | -0.192 | 6620   | 102059  | -0.192 | 6620   | 102059  | -0.192 | 6620   | 102059  | TRUE  | zfp flavin protein 1b | 220071 | -0.448                | 925                   | 1.626E-04 | TRUE   |           |           |      |
| 90805  | -0.140 | 1807   | 1423786 | -0.385 | 533    | 1032380 | -0.385 | 533    | 1032380 | -0.385 | 533    | 1032380 | TRUE  | zfp flavin protein 1b | 220071 | -0.448                | 925                   | 1.626E-04 | TRUE   |           |           |      |
| 102922 | -0.197 | 1993   | 1455504 | -0.349 | 1993   | 1455504 | -0.349 | 1993   | 1455504 | -0.349 | 1993   | 1455504 | TRUE  | zfp flavin protein 1b | 220071 | -0.448                | 925                   | 1.626E-04 | TRUE   |           |           |      |
| 96179  | -0.048 | 6234   | 1436262 | -0.147 | 921.5  | 989239  | -0.147 | 921.5  | 989239  | -0.147 | 921.5  | 989239  | TRUE  | zfp flavin protein 1b | 220071 | -0.448                | 925                   | 1.626E-04 | TRUE   |           |           |      |
| 100834 | -0.329 | 518    | 1430035 | -0.239 | 390    | 100834  | -0.239 | 390    | 100834  | -0.239 | 390    | 100834  | TRUE  | zfp flavin protein 1b | 220071 | -0.448                | 925                   | 1.626E-04 | TRUE   |           |           |      |
| 90805  | -0.332 | 640    | 1434551 | -0.205 | 518    | 1430035 | -0.205 | 518    | 1430035 | -0.205 | 518    | 1430035 | TRUE  | zfp flavin protein 1b | 220071 | -0.448                | 925                   | 1.626E-04 | TRUE   |           |           |      |
| 96551  | -0.183 | 976    | 1427188 | -0.107 | 2284.5 | 92701   | -0.107 | 2284.5 | 92701   | -0.107 | 2284.5 | 92701   | TRUE  | zfp flavin protein 1b | 220071 | -0.448                | 925                   | 1.626E-04 | TRUE   |           |           |      |
| 90202  | -0.294 | 1075   | 1425433 | -0.243 | 4881.5 | 95702   | -0.243 | 4881.5 | 95702   | -0.243 | 4881.5 | 95702   | TRUE  | zfp flavin protein 1b | 220071 | -0.448                | 925                   | 1.626E-04 | TRUE   |           |           |      |
| 92288  | -0.181 | 1780   | 1446658 | -0.178 | 669    | 92288   | -0.178 | 669    | 92288   | -0.178 | 669    | 92288   | TRUE  | zfp flavin protein 1b | 220071 | -0.448                | 925                   | 1.626E-04 | TRUE   |           |           |      |
| 140463 | -0.133 | 3272   | 1425544 | -0.166 | 251.5  | 102070  | -0.166 | 251.5  | 102070  | -0.166 | 251.5  | 102070  | TRUE  | zfp flavin protein 1b | 220071 | -0.448                | 925                   | 1.626E-04 | TRUE   |           |           |      |
| 97989  | -0.213 | 3641   | 1433585 | -0.090 | 4649   | 97989   | -0.090 | 4649   | 97989   | -0.090 | 4649   | 97989   | TRUE  | zfp flavin protein 1b | 220071 | -0.448                | 925                   | 1.626E-04 | TRUE   |           |           |      |
| 90358  | -0.085 | 4649   | 1448326 | -0.179 | 2095.5 | 103388  | -0.179 | 2095.5 | 103388  | -0.179 | 2095.5 | 103388  | TRUE  | zfp flavin protein 1b | 220071 | -0.448                | 925                   | 1.626E-04 | TRUE   |           |           |      |
| 96409  | -0.137 | 2197   | 1452899 | -0.233 | 539.5  | 97311   | -0.233 | 539.5  | 97311   | -0.233 | 539.5  | 97311   | TRUE  | zfp flavin protein 1b | 220071 | -0.448                | 925                   | 1.626E-04 | TRUE   |           |           |      |
| 90011  | -0.176 | 3282   | 1456282 | -0.101 | 1020   | 100101  | -0.101 | 1020   | 100101  | -0.101 | 1020   | 100101  | TRUE  | zfp flavin protein 1b | 220071 | -0.448                | 925                   | 1.626E-04 | TRUE   |           |           |      |
| 96409  | -0.137 | 1942   | 1415733 | -0.242 | 152.5  | 95470   | -0.242 | 152.5  | 95470   | -0.242 | 152.5  | 95470   | TRUE  | zfp flavin protein 1b | 220071 | -0.448                | 925                   | 1.626E-04 | TRUE   |           |           |      |
| 100150 | -0.237 | 1501   | 1425236 | -0.039 | 488.5  | 100150  | -0.039 | 488.5  | 100150  | -0.039 | 488.5  | 100150  | TRUE  | zfp flavin protein 1b | 220071 | -0.448                | 925                   | 1.626E-04 | TRUE   |           |           |      |
| 96950  | -0.317 | 564    | 1429139 | -0.039 | 789    | 96950   | -0.039 | 789    | 96950   | -0.039 | 789    | 96950   | TRUE  | zfp flavin protein 1b | 220071 | -0.448                | 925                   | 1.626E-04 | TRUE   |           |           |      |
| 96485  | -0.114 | 1403   | 1437385 | -0.094 | 2855   | 96830   | -0.094 | 2855   | 96830   | -0.094 | 2855   | 96830   | TRUE  | zfp flavin protein 1b | 220071 | -0.448                | 925                   | 1.626E-04 | TRUE   |           |           |      |
| 104070 | -0.210 | 1403   | 1448342 | -0.145 | 2043.5 | 100470  | -0.145 | 2043.5 | 100470  | -0.145 | 2043.5 | 100470  | TRUE  | zfp flavin protein 1b | 220071 | -0.448                | 925                   | 1.626E-04 | TRUE   |           |           |      |
| 103031 | -0.267 | 497    | 1427754 | -0.493 | 6481.5 | 103031  | -0.493 | 6481.5 | 103031  | -0.493 | 6481.5 | 103031  | TRUE  | zfp flavin protein 1b | 220071 | -0.448                | 925                   | 1.626E-04 | TRUE   |           |           |      |
| 102976 | -0.330 | 92     | 1424629 | -0.066 | 92     | 1424629 | -0.066 | 92     | 1424629 | -0.066 | 92     | 1424629 | TRUE  | zfp flavin protein 1b | 220071 | -0.448                | 925                   | 1.626E-04 | TRUE   |           |           |      |
| 141126 | -0.328 | 881    | 1435988 | -0.114 | 2629.5 | 161126  | -0.114 | 2629.5 | 161126  | -0.114 | 2629.5 | 161126  | TRUE  | zfp flavin protein 1b | 220071 | -0.448                | 925                   | 1.626E-04 | TRUE   |           |           |      |
| 96623  | -0.338 | 1314   | 1415911 | -0.287 | 3120   | 96623   | -0.287 | 3120   | 96623   | -0.287 | 3120   | 96623   | TRUE  | zfp flavin protein 1b | 220071 | -0.448                | 925                   | 1.626E-04 | TRUE   |           |           |      |
| 140706 | -0.037 | 6350   | 1435004 | -0.087 | 425.5  | 160706  | -0.087 | 425.5  | 160706  | -0.087 | 425.5  | 160706  | TRUE  | zfp flavin protein 1b | 220071 | -0.448                | 925                   | 1.626E-04 | TRUE   |           |           |      |
| 90202  | -0.138 | 2081   | 1455770 | -0.280 | 422    | 90202   | -0.280 | 422    | 90202   | -0.280 | 422    | 90202   | TRUE  | zfp flavin protein 1b | 220071 | -0.448                | 925                   | 1.626E-04 | TRUE   |           |           |      |
| 102287 | -0.196 | 742    | 1428859 | -0.195 | 139    | 102287  | -0.195 | 139    | 102287  | -0.195 | 139    | 102287  | TRUE  | zfp flavin protein 1b | 220071 | -0.448                | 925                   | 1.626E-04 | TRUE   |           |           |      |
| 96550  | -0.328 | 130    | 1419664 | -0.089 | 572    | 1419664 | -0.089 | 572    | 1419664 | -0.089 | 572    | 1419664 | TRUE  | zfp flavin protein 1b | 220071 | -0.448                | 925                   | 1.626E-04 | TRUE   |           |           |      |
| 103399 | -0.119 | 2291   | 1426241 | -0.083 | 4231   | 103399  | -0.083 | 4231   | 103399  | -0.083 | 4231   | 103399  | TRUE  | zfp flavin protein 1b | 220071 | -0.448                | 925                   | 1.626E-04 | TRUE   |           |           |      |
| 96916  | -0.130 | 2425   | 1448728 | -0.110 | 2982   | 96916   | -0.110 | 2982   | 96916   | -0.110 | 2982   | 96916   | TRUE  | zfp flavin protein 1b | 220071 | -0.448                | 925                   | 1.626E-04 | TRUE   |           |           |      |
| 96059  | -0.295 | 7227   | 1436349 | -0.329 | 499.5  | 96059   | -0.329 | 499.5  | 96059   | -0.329 | 499.5  | 96059   | TRUE  | zfp flavin protein 1b | 220071 | -0.448                | 925                   | 1.626E-04 | TRUE   |           |           |      |
| 96421  | -0.209 | 1494.5 | 1426868 | -0.170 | 1494.5 | 96421   | -0.170 | 1494.5 | 96421   | -0.170 | 1494.5 | 96421   | TRUE  | zfp flavin protein 1b | 220071 | -0.448                | 925                   | 1.626E-04 | TRUE   |           |           |      |
| 96082  | -0.135 | 2242   | 1450978 | -0.112 | 733.5  | 96082   | -0.112 | 733.5  | 96082   | -0.112 | 733.5  | 96082   | TRUE  | zfp flavin protein 1b | 220071 | -0.448                | 925                   | 1.626E-04 | TRUE   |           |           |      |
| 140782 | -0.094 | 3292   | 1450576 | -0.584 | 1125   | 140782  | -0.584 | 1125   | 140782  | -0.584 | 1125   | 140782  | TRUE  | zfp flavin protein 1b | 220071 | -0.448                | 925                   | 1.626E-04 | TRUE   |           |           |      |
| 90994  | -0.146 | 2579   | 1451631 | -0.204 | 1455   | 160782  | -0.204 | 1455   | 160782  | -0.204 | 1455   | 160782  | TRUE  | zfp flavin protein 1b | 220071 | -0.448                | 925                   | 1.626E-04 | TRUE   |           |           |      |
| 98980  | -0.045 | 2014   | 1418152 | -0.140 | 14895  | 98980   | -0.140 | 14895  | 98980   | -0.140 | 14895  | 98980   | TRUE  | zfp flavin protein 1b | 220071 | -0.448                | 925                   | 1.626E-04 | TRUE   |           |           |      |
| 95348  | -0.128 | 6930   | 1417654 | -0.310 | 3300   | 95348   | -0.310 | 3300   | 95348   | -0.310 | 3300   | 95348   | TRUE  | zfp flavin protein 1b | 220071 | -0.448                | 925                   | 1.626E-04 | TRUE   |           |           |      |
| 97909  | -0.206 | 3888   | 1419589 | -0.142 | 2703.5 | 97909   | -0.142 | 2703.5 | 97909   | -0.142 | 2703.5 | 97909   | TRUE  | zfp flavin protein 1b | 220071 | -0.448                | 925                   | 1.626E-04 | TRUE   |           |           |      |
| 146055 | -0.404 | 489    | 1422718 | -0.363 | 489    | 1422718 | -0.363 | 489    | 1422718 | -0.363 | 489    | 1422718 | TRUE  | zfp flavin protein 1b | 220071 | -0.448                | 925                   | 1.626E-04 | TRUE   |           |           |      |
| 92700  | -0.248 | 3877   | 1416718 | -0.173 | 1718   | 92700   | -0.173 | 1718   | 92700   | -0.173 | 1718   | 92700   | TRUE  | zfp flavin protein 1b | 220071 | -0.448                | 925                   | 1.626E-04 | TRUE   |           |           |      |
| 92853  | -0.152 | 1464   | 1429434 | -0.140 | 810    | 102939  | -0.140 | 810    | 102939  | -0.140 | 810    | 102939  | TRUE  | zfp flavin protein 1b | 220071 | -0.448                | 925                   | 1.626E-04 | TRUE   |           |           |      |
| 100404 | -0.408 | 2728   | 1416388 | -0.202 | 1922   | 100404  | -0.202 | 1922   | 100404  | -0.202 | 1922   | 100404  | TRUE  | zfp flavin protein 1b | 220071 | -0.448                | 925                   | 1.626E-04 | TRUE   |           |           |      |
| 96281  | -0.106 | 4873   | 1423255 | -0.292 | 1035   | 96281   | -0.292 | 1035   | 96281   | -0.292 | 1035   | 96281   | TRUE  | zfp flavin protein 1b | 220071 | -0.448                | 925                   | 1.626E-04 | TRUE   |           |           |      |
| 145013 | -0.392 | 643    | 1420150 | -0.195 | 1333.5 | 145013  | -0.195 | 1333.5 | 145013  | -0.195 | 1333.5 | 145013  | TRUE  | zfp flavin protein 1b | 220071 | -0.448                | 925                   | 1.626E-04 | TRUE   |           |           |      |
| 102046 | -0.139 | 2697   | 1418527 | -0.208 | 2623   | 1       |        |        |         |        |        |         |       |                       |        |                       |                       |           |        |           |           |      |









|        |        |      |         |        |      |        |        |       |         |        |      |         |        |       |      |       |                           |        |   |        |       |          |       |
|--------|--------|------|---------|--------|------|--------|--------|-------|---------|--------|------|---------|--------|-------|------|-------|---------------------------|--------|---|--------|-------|----------|-------|
| 101018 | -0.002 | 4821 | 1451385 | 0.188  | 643  | 16033  | -0.145 | 259   | 143133  | 0.246  | 811  | 264     | 175    | 1134  | 7124 | FALSE | CR1L1/DM1 21100907/ gene  | 220913 | x | -0.376 | 3200  | 1.85E+06 | FALSE |
| 96888  | -0.002 | 4520 | 1434633 | 0.209  | 3426 | 95884  | -0.250 | 269   | 143674  | 0.427  | 356  | 266     | 263    | 334   | 6444 | FALSE | SRFBP1/DM1 21100907/ gene | 220914 | x | -0.282 | 4000  | 1.97E+04 | FALSE |
| 101011 | -0.047 | 101  | 1436790 | 0.209  | 334  | 10031  | 0.177  | 101   | 143879  | 0.627  | 356  | 266     | 263    | 334   | 6444 | FALSE | SRFBP1/DM1 21100907/ gene | 220915 | x | -0.271 | 4451  | 1.45E+04 | FALSE |
| 102761 | -0.045 | 5463 | 1456089 | -0.191 | 6005 | 102761 | 0.076  | 4021  | 142794  | 0.345  | 574  | 2664    | 625    | 2469  | 9515 | FALSE | SH3BP1/DM1 21100907/ gene | 220916 | x | 0.575  | 1822  | 2.79E+05 | FALSE |
| 92523  | 0.204  | 808  | 1427354 | 0.004  | 6820 | 92523  | 0.127  | 2726  | 144335  | -0.444 | 1842 | 2667    | 2667   | 2667  | 9071 | FALSE | SH3BP1/DM1 21100907/ gene | 220917 | x | -0.330 | 20757 | 1.03E+07 | FALSE |
| 90246  | 0.206  | 288  | 1433706 | 0.083  | 4879 | 90246  | 0.143  | 3801  | 145272  | 0.206  | 1808 | 2667    | 2667   | 2667  | 9071 | FALSE | SH3BP1/DM1 21100907/ gene | 220918 | x | -0.318 | 1036  | 2.20E+07 | FALSE |
| 90212  | 0.049  | 367  | 1435271 | 0.183  | 5871 | 90212  | 0.155  | 3821  | 145271  | -0.271 | 1150 | 2671    | 175    | 2098  | 1141 | FALSE | SH3BP1/DM1 21100907/ gene | 220919 | x | -0.250 | 21777 | 1.71E+07 | FALSE |
| 101486 | -0.036 | 6697 | 1448632 | 0.215  | 9036 | 101486 | 0.215  | 288   | 144863  | 0.279  | 3077 | 2672    | 875    | 2890  | 1178 | FALSE | SH3BP1/DM1 21100907/ gene | 220920 | x | -0.149 | 20659 | 6.54E+02 | FALSE |
| 101065 | 0.083  | 5550 | 1417447 | 0.084  | 5550 | 101065 | 0.230  | 1640  | 141747  | 0.214  | 1745 | 2672    | 875    | 1918  | 7995 | TRUE  | SH3BP1/DM1 21100907/ gene | 220921 | x | 0.092  | 20702 | 2.51E+02 | FALSE |
| 100499 | 0.019  | 3744 | 1425536 | -0.094 | 3744 | 100499 | 0.054  | 1143  | 142536  | -0.327 | 842  | 2672    | 875    | 2002  | 7443 | FALSE | SH3BP1/DM1 21100907/ gene | 220922 | x | -0.022 | 21698 | 5.5      | FALSE |
| 96904  | 0.235  | 282  | 1456288 | 0.524  | 380  | 96904  | 0.024  | 282   | 145628  | 0.172  | 3390 | 2672    | 875    | 3307  | 9454 | TRUE  | SH3BP1/DM1 21100907/ gene | 220923 | x | -0.784 | 9289  | 6.99E+03 | FALSE |
| 92275  | 0.197  | 1319 | 1418361 | 0.136  | 4936 | 92275  | 0.136  | 1409  | 141836  | 0.025  | 8159 | 2072    | 325    | 3301  | 9723 | TRUE  | SH3BP1/DM1 21100907/ gene | 220924 | x | 0.121  | 20897 | 5        | FALSE |
| 90388  | 0.108  | 4697 | 1417533 | 0.136  | 4697 | 90388  | 0.136  | 2520  | 142628  | 0.172  | 4446 | 2672    | 875    | 1861  | 9677 | FALSE | SH3BP1/DM1 21100907/ gene | 220925 | x | 0.327  | 8542  | 4.57E+03 | FALSE |
| 98580  | -0.200 | 2100 | 1451943 | -0.223 | 2100 | 98580  | -0.223 | 2420  | 145298  | -0.318 | 4646 | 2072    | 775    | 3300  | 9406 | FALSE | SH3BP1/DM1 21100907/ gene | 220926 | x | 0.166  | 21907 | 5        | FALSE |
| 90262  | -0.132 | 1300 | 1448475 | -0.187 | 1300 | 90262  | -0.187 | 3928  | 141221  | 0.128  | 4638 | 2680    | 75     | 1636  | 8747 | TRUE  | SH3BP1/DM1 21100907/ gene | 220927 | x | -0.145 | 21603 | 1.13E+02 | FALSE |
| 90262  | -0.132 | 1300 | 1448475 | -0.187 | 1300 | 90262  | -0.187 | 3928  | 141221  | 0.128  | 4638 | 2680    | 75     | 1636  | 8747 | TRUE  | SH3BP1/DM1 21100907/ gene | 220928 | x | -0.145 | 21603 | 1.13E+02 | FALSE |
| 99572  | -0.203 | 2486 | 1448117 | -0.284 | 2486 | 99572  | -0.284 | 5751  | 144025  | -0.242 | 2914 | 2687    | 125    | 2334  | 4027 | FALSE | SH3BP1/DM1 21100907/ gene | 220929 | x | -0.177 | 22653 | 5        | FALSE |
| 96909  | -0.143 | 4484 | 1451335 | 0.128  | 4484 | 96909  | 0.128  | 3154  | 145092  | 0.078  | 4078 | 3154    | 145092 | 0.078 | 4078 | FALSE | SH3BP1/DM1 21100907/ gene | 220930 | x | 0.268  | 15945 | 6.88E+02 | FALSE |
| 96455  | -0.035 | 6647 | 1416127 | -0.248 | 6647 | 96455  | -0.248 | 3213  | 146057  | -0.406 | 6449 | 2687    | 125    | 2469  | 9472 | FALSE | SH3BP1/DM1 21100907/ gene | 220931 | x | -0.034 | 20933 | 5        | FALSE |
| 101116 | 0.143  | 2442 | 1450321 | 0.073  | 2442 | 101116 | 0.073  | 5667  | 15      | 0.111  | 1679 | 2693    | 375    | 2117  | 8799 | TRUE  | SH3BP1/DM1 21100907/ gene | 220932 | x | 0.433  | 23985 | 1        | FALSE |
| 96594  | 0.097  | 3111 | 1419113 | 0.067  | 3111 | 96594  | 0.067  | 2275  | 141911  | -0.218 | 1689 | 2693    | 375    | 132   | 5263 | FALSE | SH3BP1/DM1 21100907/ gene | 220933 | x | -0.334 | 20613 | 5        | FALSE |
| 92448  | -0.195 | 1414 | 1424007 | -0.049 | 1414 | 92448  | -0.049 | 5177  | 142400  | 0.472  | 1676 | 2693    | 375    | 2117  | 8799 | FALSE | SH3BP1/DM1 21100907/ gene | 220934 | x | 0.070  | 20972 | 1        | FALSE |
| 100374 | -0.085 | 2574 | 1428401 | 0.180  | 2574 | 100374 | 0.180  | 4674  | 100374  | -0.054 | 481  | 2693    | 375    | 2396  | 742  | FALSE | SH3BP1/DM1 21100907/ gene | 220935 | x | -0.101 | 22999 | 5        | FALSE |
| 100001 | 0.197  | 4697 | 1417533 | -0.176 | 4697 | 100001 | -0.176 | 1345  | 142718  | 0.043  | 4638 | 2693    | 375    | 222   | 8166 | FALSE | SH3BP1/DM1 21100907/ gene | 220936 | x | 0.327  | 20125 | 5        | FALSE |
| 90222  | 0.116  | 826  | 1452521 | 0.422  | 826  | 90222  | 0.422  | 1032  | 145252  | 0.049  | 7520 | 2693    | 375    | 3300  | 9406 | FALSE | SH3BP1/DM1 21100907/ gene | 220937 | x | 0.130  | 20864 | 5        | FALSE |
| 184232 | 0.219  | 3252 | 1456599 | 0.200  | 3252 | 184232 | 0.200  | 545   | 143107  | 0.196  | 7819 | 2693    | 375    | 347   | 6415 | FALSE | SH3BP1/DM1 21100907/ gene | 220938 | x | -0.050 | 23242 | 5        | FALSE |
| 90881  | -0.144 | 1521 | 1425792 | -0.063 | 1521 | 90881  | -0.063 | 5256  | 90881   | -0.344 | 1349 | 2701    | 125    | 1471  | 5159 | FALSE | SH3BP1/DM1 21100907/ gene | 220939 | x | 0.696  | 20544 | 5        | FALSE |
| 101010 | 0.206  | 801  | 1424315 | 0.136  | 801  | 101010 | 0.136  | 2456  | 101010  | 0.092  | 3643 | 2701    | 125    | 1471  | 5159 | FALSE | SH3BP1/DM1 21100907/ gene | 220940 | x | -0.134 | 21998 | 5        | FALSE |
| 102432 | -0.078 | 3719 | 1417014 | -0.101 | 3719 | 102432 | -0.101 | 4801  | 15      | -0.181 | 826  | 1414701 | 5      | 0.078 | 4078 | FALSE | SH3BP1/DM1 21100907/ gene | 220941 | x | 0.818  | 22467 | 5        | FALSE |
| 102432 | -0.092 | 3681 | 1416504 | -0.113 | 3681 | 102432 | -0.113 | 4081  | 102432  | 0.099  | 4818 | 2701    | 125    | 1744  | 4899 | FALSE | SH3BP1/DM1 21100907/ gene | 220942 | x | -0.544 | 20933 | 5        | FALSE |
| 103763 | -0.126 | 4340 | 1450750 | -0.302 | 4340 | 103763 | -0.302 | 6184  | 1450750 | -0.664 | 370  | 2705    | 125    | 1744  | 4899 | FALSE | SH3BP1/DM1 21100907/ gene | 220943 | x | 0.141  | 22581 | 5        | FALSE |
| 102076 | -0.154 | 3648 | 1429718 | -0.088 | 3648 | 102076 | -0.088 | 329   | 142971  | -0.422 | 187  | 2705    | 125    | 2089  | 4172 | FALSE | SH3BP1/DM1 21100907/ gene | 220944 | x | 0.94   | 24193 | 5        | FALSE |
| 92421  | -0.208 | 2210 | 1419249 | -0.330 | 2210 | 92421  | -0.330 | 13405 | 92421   | 0.043  | 497  | 2706    | 125    | 3035  | 9485 | FALSE | SH3BP1/DM1 21100907/ gene | 220945 | x | -0.309 | 20464 | 5        | FALSE |
| 102076 | -0.154 | 3648 | 1429718 | -0.088 | 3648 | 102076 | -0.088 | 329   | 142971  | -0.422 | 187  | 2705    | 125    | 2089  | 4172 | FALSE | SH3BP1/DM1 21100907/ gene | 220946 | x | 0.94   | 24193 | 5        | FALSE |
| 103070 | -0.285 | 493  | 1448534 | -0.192 | 493  | 103070 | -0.192 | 1216  | 144853  | 0.008  | 8434 | 2709    | 25     | 388   | 6444 | FALSE | SH3BP1/DM1 21100907/ gene | 220947 | x | 0.177  | 20897 | 5        | FALSE |
| 96468  | 0.214  | 3928 | 1460194 | 0.207  | 3928 | 96468  | 0.207  | 4111  | 146008  | 0.043  | 6678 | 2709    | 25     | 388   | 6444 | FALSE | SH3BP1/DM1 21100907/ gene | 220948 | x | 0.186  | 20954 | 5        | FALSE |
| 91557  | -0.234 | 1802 | 1438547 | -0.078 | 1802 | 91557  | -0.078 | 1113  | 143854  | -0.042 | 1416 | 2709    | 25     | 283   | 5858 | FALSE | SH3BP1/DM1 21100907/ gene | 220949 | x | 0.024  | 20864 | 5        | FALSE |
| 101518 | 0.247  | 644  | 1451412 | 0.171  | 644  | 101518 | 0.171  | 4945  | 101518  | 0.296  | 2340 | 2710    | 75     | 136   | 7004 | FALSE | SH3BP1/DM1 21100907/ gene | 220950 | x | 0.117  | 23108 | 5        | FALSE |
| 101518 | 0.247  | 644  | 1451412 | 0.171  | 644  | 101518 | 0.171  | 4945  | 101518  | 0.296  | 2340 | 2710    | 75     | 136   | 7004 | FALSE | SH3BP1/DM1 21100907/ gene | 220951 | x | 0.117  | 23108 | 5        | FALSE |
| 101511 | 0.048  | 6429 | 1427096 | 0.125  | 6429 | 101511 | 0.125  | 2466  | 5       | 0.049  | 6429 | 2712    | 625    | 2526  | 6524 | FALSE | SH3BP1/DM1 21100907/ gene | 220952 | x | -0.043 | 22655 | 5        | FALSE |
| 161781 | 0.180  | 1432 | 1416092 | 0.226  | 1432 | 161781 | 0.226  | 557   | 141678  | 0.041  | 2602 | 2713    | 875    | 2830  | 8816 | FALSE | SH3BP1/DM1 21100907/ gene | 220953 | x | -0.023 | 20470 | 5        | FALSE |
| 16210  | 0.161  | 2519 | 1426710 | 0.178  | 2519 | 16210  | 0.178  | 1407  | 142671  | -0.122 | 309  | 2714    | 875    | 1043  | 8852 | FALSE | SH3BP1/DM1 21100907/ gene | 220954 | x | -0.242 | 21856 | 5        | FALSE |
| 94510  | 0.202  | 1165 | 1434522 | 0.041  | 1165 | 94510  | 0.041  | 623   | 143299  | 0.315  | 1150 | 2715    | 125    | 2396  | 7221 | FALSE | SH3BP1/DM1 21100907/ gene | 220955 | x | 0.199  | 20850 | 5        | FALSE |
| 96313  | 0.015  | 801  | 1422600 | -0.311 | 801  | 96313  | -0.311 | 501   | 142260  | -0.465 | 162  | 2715    | 125    | 387   | 7021 | FALSE | SH3BP1/DM1 21100907/ gene | 220956 | x | -0.242 | 21856 | 5        | FALSE |
| 101534 | -0.085 | 666  | 1420289 | 0.199  | 666  | 101534 | 0.199  | 2345  | 101534  | -0.24  | 1832 | 2717    | 875    | 237   | 805  | FALSE | SH3BP1/DM1 21100907/ gene | 220957 | x | 0.174  | 22815 | 5        | FALSE |
| 94979  | -0.234 | 1228 | 1451221 | -0.087 | 1228 | 94979  | -0.087 | 990   | 145122  | -0.179 | 162  | 2717    | 875    | 237   | 805  | FALSE | SH3BP1/DM1 21100907/ gene | 220958 | x | -0.031 | 22807 | 5        | FALSE |
| 100097 | -0.044 | 621  | 1455550 | 0.206  | 621  | 100097 | 0.206  | 881   | 100097  | 0.158  | 1042 | 2717    | 875    | 237   | 805  | FALSE | SH3BP1/DM1 21100907/ gene | 220959 | x | 0.176  | 20854 | 5        | FALSE |
| 104267 | -0.099 | 2777 | 1417329 | -0.188 | 2777 | 104267 | -0.188 | 1533  | 104267  | -0.057 | 641  | 2721    | 75     | 230   | 733  | FALSE | SH3BP1/DM1 21100907/ gene | 220960 | x | -0.118 | 20923 | 5        | FALSE |
| 140394 | -0.464 | 451  | 1427244 | 0.018  | 451  | 140394 | 0.018  | 780   | 140394  | 0.238  | 1655 | 2722    | 625    | 3411  | 9073 | FALSE | SH3BP1/DM1 21100907/ gene | 220961 | x | -0.043 | 20854 | 5        | FALSE |
| 91314  | -0.261 | 333  | 1434877 | -0.261 | 333  | 91314  | -0.261 | 426   | 143487  | -0.528 | 440  | 2722    | 625    | 2175  | 5204 | FALSE | SH3BP1/DM1 21100907/ gene | 220962 | x | -0.845 | 20844 | 5        | FALSE |
| 102223 | 0.189  | 1526 | 1417697 | 0.087  | 1526 | 102223 | 0.087  | 4429  | 141769  | -0.147 | 2635 | 2722    | 625    | 1316  | 9811 | TRUE  | SH3BP1/DM1 21100907/ gene | 220963 | x | -0.225 | 21856 | 5        | FALSE |
| 102223 | 0.189  | 1526 | 1417697 | 0.087  | 1526 | 102223 | 0.087  | 4429  | 141769  | -0.147 | 2635 | 2722    | 625    | 1316  | 9811 | TRUE  | SH3BP1/DM1 21100907/ gene | 220964 | x | -0.225 | 21856 | 5        | FALSE |
| 92284  | 0.266  | 279  |         |        |      |        |        |       |         |        |      |         |        |       |      |       |                           |        |   |        |       |          |       |



|        |        |         |         |        |        |        |        |         |         |        |        |         |         |        |                                                 |                                |                                |       |          |          |          |       |
|--------|--------|---------|---------|--------|--------|--------|--------|---------|---------|--------|--------|---------|---------|--------|-------------------------------------------------|--------------------------------|--------------------------------|-------|----------|----------|----------|-------|
| 91828  | 1184   | 1418377 | 0.007   | 4320.5 | 97828  | 0.135  | 1514   | 1430323 | 0.154   | 2126   | 2872   | 2301    | 1474    | FALSE  | CSD1 (cellular protein fibronectin degradation) | 21079                          | 0.147                          | 1887  | 2.47E-02 | FALSE    |          |       |
| 104261 | 1152   | 1435077 | -0.134  | 1450   | 143671 | -0.460 | 1936   | 1449304 | -0.255  | 1805   | 2874   | 1797    | 5262    | TRUE   | Protein tyrosine phosphatase 1                  | 20908                          | 0.311                          | 1314  | 3.89E-02 | FALSE    |          |       |
| 94930  | 1076   | 1442664 | 0.016   | 481.5  | 94930  | 0.078  | 1036   | 1447864 | 0.130   | 1835   | 2875   | 1829    | 5262    | TRUE   | Protein tyrosine phosphatase 1                  | 20908                          | 0.311                          | 1314  | 3.89E-02 | FALSE    |          |       |
| 99136  | -0.053 | 589     | 1488271 | 0.298  | 329    | 99136  | 0.836  | 1014    | 1423581 | -0.290 | 1455   | 2876    | 625     | FALSE  | AXL receptor tyrosine kinase                    | 20468                          | 0.322                          | 5763  | 2.04E-01 | FALSE    |          |       |
| 92920  | -0.209 | 146     | 1419798 | -0.139 | 563.5  | 92920  | -0.106 | 7238    | 1420700 | -0.386 | 979    | 2978    | 375     | FALSE  | Protein tyrosine phosphatase 1                  | 20908                          | 0.311                          | 1314  | 3.89E-02 | FALSE    |          |       |
| 96360  | -0.592 | 106     | 1422114 | 0.004  | 526.5  | 96360  | 0.004  | 2077    | 1422114 | 0.004  | 1194   | 2877    | 125     | FALSE  | E2F2 transcription factor                       | 20484                          | 0.011                          | 2084  | 3.16E-01 | FALSE    |          |       |
| 103260 | 0.117  | 2271    | 1422093 | 0.052  | 544.5  | 103260 | 0.052  | 1151    | 1447661 | 0.244  | 2855   | 2880    | 375     | TRUE   | Protein tyrosine phosphatase 1                  | 20908                          | 0.311                          | 1314  | 3.89E-02 | FALSE    |          |       |
| 93529  | 0.287  | 1522    | 1419641 | -0.132 | 411    | 93529  | -0.132 | 3054    | 93529   | 0.054  | 6642   | 2881    | 125     | FALSE  | Protein tyrosine phosphatase 1                  | 20908                          | 0.311                          | 1314  | 3.89E-02 | FALSE    |          |       |
| 90908  | -0.078 | 4365    | 1434331 | 0.228  | 1081.5 | 90908  | 0.228  | 1241.5  | 90908   | 0.098  | 5620   | 2882    | 375     | FALSE  | Protein tyrosine phosphatase 1                  | 20908                          | 0.311                          | 1314  | 3.89E-02 | FALSE    |          |       |
| 90986  | 0.046  | 4450    | 1419438 | 0.208  | 1241.5 | 90986  | 0.208  | 1241.5  | 90986   | 0.046  | 5620   | 2882    | 375     | FALSE  | Protein tyrosine phosphatase 1                  | 20908                          | 0.311                          | 1314  | 3.89E-02 | FALSE    |          |       |
| 97266  | 0.266  | 464     | 1427226 | 0.199  | 464    | 97266  | 0.199  | 2271.5  | 97266   | 0.266  | 2883   | 2883    | 375     | TRUE   | Protein tyrosine phosphatase 1                  | 20908                          | 0.311                          | 1314  | 3.89E-02 | FALSE    |          |       |
| 141323 | 0.131  | 1548    | 1445292 | 0.000  | 1548   | 141323 | 0.000  | 1548    | 1445292 | 0.131  | 2040   | 2884    | 25      | FALSE  | Protein tyrosine phosphatase 1                  | 20908                          | 0.311                          | 1314  | 3.89E-02 | FALSE    |          |       |
| 97100  | 0.150  | 1971    | 1419208 | 0.127  | 2474   | 97100  | 0.127  | 5032    | 1419208 | -0.165 | 2040   | 2884    | 25      | FALSE  | Protein tyrosine phosphatase 1                  | 20908                          | 0.311                          | 1314  | 3.89E-02 | FALSE    |          |       |
| 103217 | -0.055 | 5960    | 1449371 | 0.111  | 5960   | 103217 | 0.111  | 2291.5  | 103217  | -0.103 | 584    | 2885    | 375     | FALSE  | Protein tyrosine phosphatase 1                  | 20908                          | 0.311                          | 1314  | 3.89E-02 | FALSE    |          |       |
| 96588  | 0.157  | 1104    | 1426251 | 0.103  | 1104   | 96588  | 0.103  | 2665    | 1442505 | 0.090  | 4488   | 2886    | 25      | FALSE  | Protein tyrosine phosphatase 1                  | 20908                          | 0.311                          | 1314  | 3.89E-02 | FALSE    |          |       |
| 110303 | -0.198 | 2029    | 1444721 | -0.098 | 2029   | 110303 | -0.098 | 2665    | 1442505 | -0.129 | 4488   | 2886    | 25      | FALSE  | Protein tyrosine phosphatase 1                  | 20908                          | 0.311                          | 1314  | 3.89E-02 | FALSE    |          |       |
| 141718 | 0.224  | 577     | 1425639 | 0.017  | 7260.5 | 141718 | 0.017  | 7260.5  | 1425639 | 0.224  | 1084   | 2887    | 375     | FALSE  | Protein tyrosine phosphatase 1                  | 20908                          | 0.311                          | 1314  | 3.89E-02 | FALSE    |          |       |
| 91323  | 0.155  | 1786    | 1442669 | -0.198 | 1786   | 91323  | -0.198 | 7296.5  | 91323   | -0.024 | 1890   | 2887    | 375     | FALSE  | Protein tyrosine phosphatase 1                  | 20908                          | 0.311                          | 1314  | 3.89E-02 | FALSE    |          |       |
| 97828  | 0.178  | 1972    | 1446271 | 0.024  | 1972   | 97828  | 0.024  | 1749    | 1412173 | 0.024  | 1890   | 2887    | 375     | FALSE  | Protein tyrosine phosphatase 1                  | 20908                          | 0.311                          | 1314  | 3.89E-02 | FALSE    |          |       |
| 142020 | 0.265  | 245     | 1432737 | 0.163  | 245    | 142020 | 0.163  | 1726    | 162220  | 0.068  | 464    | 2888    | 375     | FALSE  | Protein tyrosine phosphatase 1                  | 20908                          | 0.311                          | 1314  | 3.89E-02 | FALSE    |          |       |
| 103334 | 0.077  | 4050    | 1418758 | -0.111 | 4050   | 103334 | -0.111 | 3097    | 103334  | 0.077  | 464    | 2888    | 375     | FALSE  | Protein tyrosine phosphatase 1                  | 20908                          | 0.311                          | 1314  | 3.89E-02 | FALSE    |          |       |
| 97182  | 0.138  | 1776    | 1422355 | 0.002  | 1776   | 97182  | 0.002  | 4449.5  | 97182   | 0.138  | 2595   | 2889    | 375     | FALSE  | Protein tyrosine phosphatase 1                  | 20908                          | 0.311                          | 1314  | 3.89E-02 | FALSE    |          |       |
| 90372  | 0.223  | 413     | 1447004 | 0.031  | 388.5  | 90372  | 0.031  | 388.5   | 97182   | 0.122  | 2309   | 142355  | 0.002   | 2889   | FALSE                                           | Protein tyrosine phosphatase 1 | 20908                          | 0.311 | 1314     | 3.89E-02 | FALSE    |       |
| 97647  | -0.288 | 1183    | 1416404 | 0.087  | 1183   | 97647  | 0.087  | 2527    | 97647   | 0.135  | 2022   | 145835  | 0.087   | 1458   | FALSE                                           | Protein tyrosine phosphatase 1 | 20908                          | 0.311 | 1314     | 3.89E-02 | FALSE    |       |
| 104506 | -0.163 | 274     | 1433349 | 0.119  | 274    | 104506 | 0.119  | 2853    | 160200  | -0.029 | 464    | 2889    | 375     | FALSE  | Protein tyrosine phosphatase 1                  | 20908                          | 0.311                          | 1314  | 3.89E-02 | FALSE    |          |       |
| 104506 | -0.263 | 183     | 1424737 | 0.029  | 183    | 104506 | 0.029  | 7338    | 160200  | 0.119  | 464    | 2889    | 375     | FALSE  | Protein tyrosine phosphatase 1                  | 20908                          | 0.311                          | 1314  | 3.89E-02 | FALSE    |          |       |
| 99064  | -0.236 | 2263    | 1415153 | -0.302 | 2263   | 99064  | -0.302 | 1818    | 1424737 | -0.029 | 464    | 2889    | 375     | FALSE  | Protein tyrosine phosphatase 1                  | 20908                          | 0.311                          | 1314  | 3.89E-02 | FALSE    |          |       |
| 140713 | 0.141  | 3120    | 1419047 | 0.152  | 3120   | 140713 | 0.152  | 681.5   | 99064   | 0.198  | 296    | 1418713 | 0.198   | 296    | FALSE                                           | Protein tyrosine phosphatase 1 | 20908                          | 0.311 | 1314     | 3.89E-02 | FALSE    |       |
| 100060 | -0.196 | 1449    | 1418290 | -0.105 | 1449   | 100060 | -0.105 | 2122    | 100060  | -0.196 | 1402   | 160211  | 0.105   | 1402   | FALSE                                           | Protein tyrosine phosphatase 1 | 20908                          | 0.311 | 1314     | 3.89E-02 | FALSE    |       |
| 96242  | 0.125  | 2263    | 1415153 | 0.146  | 2263   | 96242  | 0.146  | 1004    | 1449291 | 0.125  | 1004   | 1449291 | 0.125   | 1004   | FALSE                                           | Protein tyrosine phosphatase 1 | 20908                          | 0.311 | 1314     | 3.89E-02 | FALSE    |       |
| 103334 | 0.095  | 3143    | 1451414 | 0.257  | 3143   | 103334 | 0.257  | 399     | 160265  | 0.067  | 687    | 382     | 144265  | FALSE  | Protein tyrosine phosphatase 1                  | 20908                          | 0.311                          | 1314  | 3.89E-02 | FALSE    |          |       |
| 97713  | 0.235  | 1000    | 1452705 | 0.406  | 1000   | 97713  | 0.406  | 2114.5  | 160161  | 0.136  | 1172   | 1412527 | 0.136   | 1172   | FALSE                                           | Protein tyrosine phosphatase 1 | 20908                          | 0.311 | 1314     | 3.89E-02 | FALSE    |       |
| 96290  | -0.042 | 6978    | 1420715 | -0.284 | 6978   | 96290  | -0.284 | 896     | 1420715 | 0.141  | 1172   | 1412527 | 0.141   | 1172   | FALSE                                           | Protein tyrosine phosphatase 1 | 20908                          | 0.311 | 1314     | 3.89E-02 | FALSE    |       |
| 143430 | 0.218  | 552     | 1429772 | 0.017  | 552    | 143430 | 0.017  | 602.5   | 94260   | 0.176  | 3371   | 141666  | 0.176   | 3371   | FALSE                                           | Protein tyrosine phosphatase 1 | 20908                          | 0.311 | 1314     | 3.89E-02 | FALSE    |       |
| 151681 | 0.160  | 2129    | 1448522 | 0.072  | 2129   | 151681 | 0.072  | 5096    | 151681  | 0.160  | 2129   | 1448522 | 0.160   | 2129   | FALSE                                           | Protein tyrosine phosphatase 1 | 20908                          | 0.311 | 1314     | 3.89E-02 | FALSE    |       |
| 145171 | 0.140  | 3162    | 1431680 | 0.004  | 3162   | 145171 | 0.004  | 3382    | 1431680 | 0.140  | 3162   | 1431680 | 0.140   | 3162   | FALSE                                           | Protein tyrosine phosphatase 1 | 20908                          | 0.311 | 1314     | 3.89E-02 | FALSE    |       |
| 98330  | 0.215  | 818     | 142424  | 0.182  | 818    | 98330  | 0.182  | 2315    | 98330   | 0.215  | 818    | 142424  | 0.215   | 818    | FALSE                                           | Protein tyrosine phosphatase 1 | 20908                          | 0.311 | 1314     | 3.89E-02 | FALSE    |       |
| 97972  | -0.152 | 1881    | 1448434 | -0.128 | 1881   | 97972  | -0.128 | 4935    | 97972   | -0.152 | 1881   | 1448434 | -0.152  | 1881   | FALSE                                           | Protein tyrosine phosphatase 1 | 20908                          | 0.311 | 1314     | 3.89E-02 | FALSE    |       |
| 92974  | 0.165  | 1000    | 1449291 | 0.163  | 1000   | 92974  | 0.163  | 1004    | 1449291 | 0.165  | 1000   | 1449291 | 0.165   | 1000   | FALSE                                           | Protein tyrosine phosphatase 1 | 20908                          | 0.311 | 1314     | 3.89E-02 | FALSE    |       |
| 103734 | 0.206  | 2259    | 1455773 | 0.125  | 2259   | 103734 | 0.125  | 5375    | 1455773 | 0.206  | 2259   | 1455773 | 0.206   | 2259   | FALSE                                           | Protein tyrosine phosphatase 1 | 20908                          | 0.311 | 1314     | 3.89E-02 | FALSE    |       |
| 96530  | 0.444  | 593     | 1433311 | 0.139  | 593    | 96530  | 0.139  | 1955    | 96530   | 0.444  | 593    | 1433311 | 0.444   | 593    | FALSE                                           | Protein tyrosine phosphatase 1 | 20908                          | 0.311 | 1314     | 3.89E-02 | FALSE    |       |
| 102594 | -0.123 | 2379    | 1416184 | -0.088 | 2379   | 102594 | -0.088 | 3896    | 100004  | 0.087  | 4087   | 3064    | 1415814 | 0.087  | 4087                                            | FALSE                          | Protein tyrosine phosphatase 1 | 20908 | 0.311    | 1314     | 3.89E-02 | FALSE |
| 95201  | -0.571 | 1179    | 1448860 | -0.212 | 1179   | 95201  | -0.212 | 4001    | 1447054 | -0.170 | 4001   | 1447054 | -0.170  | 4001   | FALSE                                           | Protein tyrosine phosphatase 1 | 20908                          | 0.311 | 1314     | 3.89E-02 | FALSE    |       |
| 98378  | 0.138  | 3281    | 1452507 | 0.106  | 3281   | 98378  | 0.106  | 1049    | 95201   | 0.168  | 687    | 2407    | 141466  | 0.168  | 687                                             | FALSE                          | Protein tyrosine phosphatase 1 | 20908 | 0.311    | 1314     | 3.89E-02 | FALSE |
| 103400 | 0.206  | 3281    | 1452507 | 0.106  | 3281   | 103400 | 0.106  | 1049    | 95201   | 0.168  | 687    | 2407    | 141466  | 0.168  | 687                                             | FALSE                          | Protein tyrosine phosphatase 1 | 20908 | 0.311    | 1314     | 3.89E-02 | FALSE |
| 92324  | 0.248  | 439     | 141817  | 0.165  | 439    | 92324  | 0.165  | 658     | 141817  | 0.248  | 439    | 141817  | 0.248   | 439    | FALSE                                           | Protein tyrosine phosphatase 1 | 20908                          | 0.311 | 1314     | 3.89E-02 | FALSE    |       |
| 104634 | 0.092  | 5117    | 1418230 | -0.099 | 5117   | 104634 | -0.099 | 4466    | 104634  | 0.092  | 5117   | 1418230 | 0.092   | 5117   | FALSE                                           | Protein tyrosine phosphatase 1 | 20908                          | 0.311 | 1314     | 3.89E-02 | FALSE    |       |
| 99888  | 0.170  | 421     | 1421614 | 0.131  | 421    | 99888  | 0.131  | 2245    | 99888   | 0.170  | 421    | 1421614 | 0.170   | 421    | FALSE                                           | Protein tyrosine phosphatase 1 | 20908                          | 0.311 | 1314     | 3.89E-02 | FALSE    |       |
| 96301  | -0.083 | 5293    | 1421716 | -0.697 | 5293   | 96301  | -0.697 | 11      | 20      | 96301  | -0.083 | 5293    | 1421716 | -0.083 | 5293                                            | FALSE                          | Protein tyrosine phosphatase 1 | 20908 | 0.311    | 1314     | 3.89E-02 | FALSE |
| 104112 | 0.102  | 3015    | 1437411 | 0.059  | 3015   | 104112 | 0.059  | 6254    | 104112  | 0.102  | 3015   | 1437411 | 0.102   | 3015   | FALSE                                           | Protein tyrosine phosphatase 1 | 20908                          | 0.311 | 1314     | 3.89E-02 | FALSE    |       |
| 90429  | 0.142  | 1399    | 1430747 | 0.006  | 1399   | 90429  | 0.006  | 3428    | 103489  | 0.142  | 1399   | 1430747 | 0.142   | 1399   | FALSE                                           | Protein tyrosine phosphatase 1 | 20908                          | 0.311 | 1314     | 3.89E-02 | FALSE    |       |
| 95509  | 0.009  | 2700    | 1425805 | -0.119 | 2700   | 95509  | -0.119 | 2912    | 95509   | 0.009  | 2700   | 1425805 | 0.009   | 2700   | FALSE                                           | Protein tyrosine phosphatase 1 | 20908                          | 0.311 | 1314     | 3.89E-02 | FALSE    |       |
| 96612  | -0.161 | 2970    | 1421652 | -0.008 | 2970   | 96612  | -0.008 | 8223    | 96612   | -0.161 | 2970   | 1421652 | -0.161  | 2970   | FALSE                                           | Protein tyrosine phosphatase 1 | 20908                          | 0.311 | 1314     | 3.89E-02 | FALSE    |       |
| 101050 | 0.230  | 441     | 1415173 | 0.093  | 441    | 101050 | 0.093  | 4744    | 97104   | 0.230  | 441    | 1415173 | 0.230   | 441    | FALSE                                           | Protein tyrosine phosphatase 1 | 20908                          | 0.311 | 1314     | 3.89E-02 | FALSE    |       |
| 101490 | -0.162 | 2070    | 1421652 | -0.273 | 2070   | 101490 | -0.273 | 5781    | 101490  | -0.162 | 2070   | 1421652 | -0.162  | 2070   | FALSE                                           | Protein tyrosine phosphatase 1 | 20908                          | 0.311 | 1314     | 3.89E-02 | FALSE    |       |
| 103471 | 0.130  | 3499    | 1424232 | 0.105  | 3499   | 103471 | 0.105  | 1025    | 103471  | 0.130  | 3499   | 1424232 | 0.130   | 3499   | FALSE                                           | Protein tyrosine phosphatase 1 | 20908                          | 0.311 | 1314     | 3.89E-02 | FALSE    |       |
| 103281 | 0.187  | 3288    | 1450314 | -0.123 | 3288   | 103281 | -0.123 | 2742.5  | 103281  | 0.187  | 3288   |         |         |        |                                                 |                                |                                |       |          |          |          |       |





|        |        |      |         |        |        |          |        |       |         |         |        |          |          |        |                                                   |        |       |      |          |       |
|--------|--------|------|---------|--------|--------|----------|--------|-------|---------|---------|--------|----------|----------|--------|---------------------------------------------------|--------|-------|------|----------|-------|
| 140170 | 0.095  | 3481 | 1414793 | -0.124 | 1213.5 | 101.870  | -0.180 | 438   | 1417091 | -0.280  | 1179   | 3131.875 | 3201.788 | FALSE  | WIP protein domain 78                             | 229815 | 0.480 | 8944 | 5.24E-03 | FALSE |
| 98885  | -0.095 | 3489 | 1435169 | -0.124 | 1213.5 | 101.870  | -0.180 | 438   | 1435169 | -0.280  | 1185   | 3132.225 | 3201.788 | FALSE  | WIP protein domain 78                             | 229815 | 0.480 | 8944 | 5.24E-03 | FALSE |
| 140204 | -0.035 | 6913 | 1452006 | -0.135 | 2407   | 1020.200 | -0.155 | 485   | 1452006 | -0.198  | 2124   | 3132.225 | 3278.070 | TRUE   | WIP protein domain 78                             | 229815 | 0.444 | 2402 | 1.70E-05 | FALSE |
| 93960  | -0.091 | 4073 | 1432826 | -0.208 | 557.5  | 693925   | -0.208 | 0.098 | 4078    | 0.098   | 4122   | 3132.875 | 19.15736 | FALSE  | WIP protein domain 78                             | 229815 | 0.480 | 3036 | 1.21E-05 | FALSE |
| 9980   | 0.234  | 5288 | 1427051 | 0.225  | 3930.5 | 92990    | 0.235  | 1839  | 1427051 | 0.318   | 6640   | 3133.375 | 2026.582 | FALSE  | WIP protein domain 78                             | 229815 | 0.480 | 3036 | 1.21E-05 | FALSE |
| 9980   | 0.234  | 5288 | 1427051 | 0.225  | 3930.5 | 92990    | 0.235  | 1839  | 1427051 | 0.318   | 6640   | 3133.375 | 2026.582 | FALSE  | WIP protein domain 78                             | 229815 | 0.480 | 3036 | 1.21E-05 | FALSE |
| 102964 | 0.088  | 5728 | 1448208 | 0.119  | 3888.5 | 102988   | 0.119  | 4084  | 1448208 | 0.231   | 2919   | 3133.625 | 2241.205 | TRUE   | MAD1 homolog 1 (Discoless)                        | 208951 | 0.482 | 3177 | 5.52E-05 | FALSE |
| 102868 | 0.016  | 7651 | 1450424 | 0.205  | 6911.2 | 103024   | 0.205  | 1626  | 1450424 | 0.258   | 1626   | 3137.25  | 3586.533 | FALSE  | Fuchs protein domain 3                            | 208951 | 0.482 | 3177 | 5.52E-05 | FALSE |
| 103284 | -0.133 | 3575 | 1450744 | -0.205 | 4059   | 1450744  | -0.205 | 0.888 | 3575    | 1450744 | -0.215 | 3137.5   | 789.2574 | FALSE  | evolution factor RNA evolution 112                | 228929 | 0.704 | 2299 | 8.47E-04 | FALSE |
| 140199 | 0.093  | 5244 | 1410989 | -0.428 | 5244   | 1410989  | -0.428 | 0.656 | 5244    | 1410989 | -0.428 | 3138.140 | 3011.055 | FALSE  | RAD10 member R65 (occidentalis)                   | 201010 | 0.581 | 4160 | 1.01E-03 | FALSE |
| 140149 | -0.341 | 1551 | 1445095 | -0.170 | 1393   | 101933   | -0.170 | 0.256 | 1551    | 1445095 | -0.170 | 3139.25  | 2019.235 | FALSE  | RAD10 member R65 (occidentalis)                   | 201010 | 0.581 | 4160 | 1.01E-03 | FALSE |
| 960682 | -0.310 | 3021 | 1420062 | -0.003 | 5751.5 | 960682   | -0.310 | 0.137 | 3021    | 1420062 | -0.310 | 3145     | 1468268  | -0.145 | 2448                                              | 140199 | 0.935 | 8781 | 5.00E-03 | FALSE |
| 100946 | -0.140 | 2508 | 1450283 | -0.101 | 2271   | 1452318  | -0.101 | 0.401 | 2508    | 1450283 | -0.101 | 3145     | 1468268  | -0.145 | 2448                                              | 140199 | 0.935 | 8781 | 5.00E-03 | FALSE |
| 94000  | 0.078  | 7463 | 1433894 | 0.237  | 912    | 94000    | 0.078  | 0.266 | 7463    | 1433894 | 0.237  | 3152     | 387.8614 | FALSE  | protein stock protein 18                          | 208381 | 0.841 | 9172 | 6.00E-03 | FALSE |
| 102026 | -0.138 | 3298 | 1420255 | -0.104 | 2520   | 102026   | -0.138 | 0.104 | 3298    | 1420255 | -0.138 | 3153.5   | 709.0707 | FALSE  | ATPase, C11 + transmembrane beta subunit 3        | 208381 | 0.841 | 9172 | 6.00E-03 | FALSE |
| 98073  | -0.161 | 960  | 1451335 | -0.075 | 4423.5 | 98073    | -0.161 | 0.029 | 960     | 1451335 | -0.161 | 3153.5   | 202.926  | FALSE  | ATPase, C11 + transmembrane beta subunit 3        | 208381 | 0.841 | 9172 | 6.00E-03 | FALSE |
| 99816  | -0.268 | 499  | 1432481 | -0.075 | 4728   | 99816    | -0.268 | 0.075 | 499     | 1432481 | -0.268 | 3144.875 | 2839.656 | FALSE  | ATPase, C11 + transmembrane beta subunit 3        | 208381 | 0.841 | 9172 | 6.00E-03 | FALSE |
| 94203  | -0.180 | 3431 | 1450120 | -0.166 | 3004   | 1450120  | -0.180 | 0.185 | 3431    | 1450120 | -0.180 | 3146     | 3026.562 | FALSE  | ATPase, C11 + transmembrane beta subunit 3        | 208381 | 0.841 | 9172 | 6.00E-03 | FALSE |
| 94103  | 0.176  | 1220 | 1427256 | 0.177  | 699    | 94103    | 0.176  | 0.057 | 1220    | 1427256 | 0.177  | 3146     | 2489.600 | FALSE  | ATPase, C11 + transmembrane beta subunit 3        | 208381 | 0.841 | 9172 | 6.00E-03 | FALSE |
| 92381  | -0.045 | 5672 | 1423278 | -0.108 | 2671.5 | 92381    | -0.045 | 0.101 | 5672    | 1423278 | -0.045 | 3147.25  | 2251.888 | FALSE  | social animal volcano-aided type I, alpha         | 208381 | 0.841 | 9172 | 6.00E-03 | FALSE |
| 140650 | -0.199 | 539  | 1416487 | -0.027 | 7659   | 140650   | -0.199 | 0.132 | 539     | 1416487 | -0.199 | 3150.75  | 319.747  | FALSE  | ATP synthase, H+ transmembrane subunit b (MOM70P) | 208381 | 0.841 | 9172 | 6.00E-03 | FALSE |
| 9970   | 0.199  | 1852 | 1451338 | 0.295  | 772.5  | 9970     | 0.199  | 0.295 | 1852    | 1451338 | 0.199  | 3150.975 | 2212.286 | FALSE  | ATP synthase, H+ transmembrane subunit b (MOM70P) | 208381 | 0.841 | 9172 | 6.00E-03 | FALSE |
| 94000  | 0.078  | 7463 | 1433894 | 0.237  | 912    | 94000    | 0.078  | 0.266 | 7463    | 1433894 | 0.237  | 3152     | 387.8614 | FALSE  | ATP synthase, H+ transmembrane subunit b (MOM70P) | 208381 | 0.841 | 9172 | 6.00E-03 | FALSE |
| 102026 | -0.138 | 3298 | 1420255 | -0.104 | 2520   | 102026   | -0.138 | 0.104 | 3298    | 1420255 | -0.138 | 3153.5   | 709.0707 | FALSE  | ATP synthase, H+ transmembrane subunit b (MOM70P) | 208381 | 0.841 | 9172 | 6.00E-03 | FALSE |
| 102040 | -0.138 | 3298 | 1420255 | -0.104 | 2520   | 102040   | -0.138 | 0.104 | 3298    | 1420255 | -0.138 | 3153.5   | 709.0707 | FALSE  | ATP synthase, H+ transmembrane subunit b (MOM70P) | 208381 | 0.841 | 9172 | 6.00E-03 | FALSE |
| 102121 | -0.089 | 6208 | 1419191 | -0.249 | 1082   | 102121   | -0.089 | 0.143 | 6208    | 1419191 | -0.089 | 3155.5   | 202.926  | FALSE  | ATP synthase, H+ transmembrane subunit b (MOM70P) | 208381 | 0.841 | 9172 | 6.00E-03 | FALSE |
| 102561 | -0.161 | 2201 | 1450640 | -0.293 | 518    | 102561   | -0.161 | 0.134 | 2201    | 1450640 | -0.161 | 3155.5   | 202.926  | FALSE  | ATP synthase, H+ transmembrane subunit b (MOM70P) | 208381 | 0.841 | 9172 | 6.00E-03 | FALSE |
| 102278 | 0.223  | 803  | 1450175 | 0.100  | 2810   | 102278   | 0.223  | 0.024 | 803     | 1450175 | 0.223  | 3157.25  | 2477.921 | FALSE  | ATP synthase, H+ transmembrane subunit b (MOM70P) | 208381 | 0.841 | 9172 | 6.00E-03 | FALSE |
| 96051  | 0.240  | 658  | 1426417 | -0.120 | 3854.5 | 96051    | 0.240  | 0.309 | 658     | 1426417 | -0.120 | 3158.125 | 323.891  | FALSE  | ATP synthase, H+ transmembrane subunit b (MOM70P) | 208381 | 0.841 | 9172 | 6.00E-03 | FALSE |
| 100021 | 0.044  | 5852 | 1426026 | 0.309  | 2086   | 1426026  | 0.044  | 0.056 | 5852    | 1426026 | 0.044  | 3160     | 2697.059 | FALSE  | ATP synthase, H+ transmembrane subunit b (MOM70P) | 208381 | 0.841 | 9172 | 6.00E-03 | FALSE |
| 100044 | -0.140 | 2354 | 1416277 | -0.193 | 1924.5 | 100044   | -0.140 | 0.151 | 2354    | 1416277 | -0.140 | 3160.75  | 208.926  | FALSE  | ATP synthase, H+ transmembrane subunit b (MOM70P) | 208381 | 0.841 | 9172 | 6.00E-03 | FALSE |
| 94000  | 0.078  | 7463 | 1433894 | 0.237  | 912    | 94000    | 0.078  | 0.266 | 7463    | 1433894 | 0.237  | 3162.625 | 1866.499 | FALSE  | ATP synthase, H+ transmembrane subunit b (MOM70P) | 208381 | 0.841 | 9172 | 6.00E-03 | FALSE |
| 101914 | 0.118  | 1173 | 1434117 | 0.216  | 542    | 101914   | 0.118  | 0.114 | 1173    | 1434117 | 0.118  | 3162.625 | 1866.499 | FALSE  | ATP synthase, H+ transmembrane subunit b (MOM70P) | 208381 | 0.841 | 9172 | 6.00E-03 | FALSE |
| 96041  | -0.083 | 3709 | 1449046 | -0.145 | 1540   | 96041    | -0.083 | 0.051 | 3709    | 1449046 | -0.083 | 3164.25  | 1420.576 | TRUE   | ATP synthase, H+ transmembrane subunit b (MOM70P) | 208381 | 0.841 | 9172 | 6.00E-03 | FALSE |
| 102528 | 0.254  | 23   | 1455526 | 0.221  | 3271   | 102528   | 0.254  | 0.070 | 23      | 1455526 | 0.254  | 3164.75  | 3491.051 | TRUE   | ATP synthase, H+ transmembrane subunit b (MOM70P) | 208381 | 0.841 | 9172 | 6.00E-03 | FALSE |
| 102528 | 0.254  | 23   | 1455526 | 0.221  | 3271   | 102528   | 0.254  | 0.070 | 23      | 1455526 | 0.254  | 3164.75  | 3491.051 | TRUE   | ATP synthase, H+ transmembrane subunit b (MOM70P) | 208381 | 0.841 | 9172 | 6.00E-03 | FALSE |
| 102528 | 0.254  | 23   | 1455526 | 0.221  | 3271   | 102528   | 0.254  | 0.070 | 23      | 1455526 | 0.254  | 3164.75  | 3491.051 | TRUE   | ATP synthase, H+ transmembrane subunit b (MOM70P) | 208381 | 0.841 | 9172 | 6.00E-03 | FALSE |
| 102528 | 0.254  | 23   | 1455526 | 0.221  | 3271   | 102528   | 0.254  | 0.070 | 23      | 1455526 | 0.254  | 3164.75  | 3491.051 | TRUE   | ATP synthase, H+ transmembrane subunit b (MOM70P) | 208381 | 0.841 | 9172 | 6.00E-03 | FALSE |
| 102528 | 0.254  | 23   | 1455526 | 0.221  | 3271   | 102528   | 0.254  | 0.070 | 23      | 1455526 | 0.254  | 3164.75  | 3491.051 | TRUE   | ATP synthase, H+ transmembrane subunit b (MOM70P) | 208381 | 0.841 | 9172 | 6.00E-03 | FALSE |
| 102528 | 0.254  | 23   | 1455526 | 0.221  | 3271   | 102528   | 0.254  | 0.070 | 23      | 1455526 | 0.254  | 3164.75  | 3491.051 | TRUE   | ATP synthase, H+ transmembrane subunit b (MOM70P) | 208381 | 0.841 | 9172 | 6.00E-03 | FALSE |
| 102528 | 0.254  | 23   | 1455526 | 0.221  | 3271   | 102528   | 0.254  | 0.070 | 23      | 1455526 | 0.254  | 3164.75  | 3491.051 | TRUE   | ATP synthase, H+ transmembrane subunit b (MOM70P) | 208381 | 0.841 | 9172 | 6.00E-03 | FALSE |
| 102528 | 0.254  | 23   | 1455526 | 0.221  | 3271   | 102528   | 0.254  | 0.070 | 23      | 1455526 | 0.254  | 3164.75  | 3491.051 | TRUE   | ATP synthase, H+ transmembrane subunit b (MOM70P) | 208381 | 0.841 | 9172 | 6.00E-03 | FALSE |
| 102528 | 0.254  | 23   | 1455526 | 0.221  | 3271   | 102528   | 0.254  | 0.070 | 23      | 1455526 | 0.254  | 3164.75  | 3491.051 | TRUE   | ATP synthase, H+ transmembrane subunit b (MOM70P) | 208381 | 0.841 | 9172 | 6.00E-03 | FALSE |
| 102528 | 0.254  | 23   | 1455526 | 0.221  | 3271   | 102528   | 0.254  | 0.070 | 23      | 1455526 | 0.254  | 3164.75  | 3491.051 | TRUE   | ATP synthase, H+ transmembrane subunit b (MOM70P) | 208381 | 0.841 | 9172 | 6.00E-03 | FALSE |
| 102528 | 0.254  | 23   | 1455526 | 0.221  | 3271   | 102528   | 0.254  | 0.070 | 23      | 1455526 | 0.254  | 3164.75  | 3491.051 | TRUE   | ATP synthase, H+ transmembrane subunit b (MOM70P) | 208381 | 0.841 | 9172 | 6.00E-03 | FALSE |
| 102528 | 0.254  | 23   | 1455526 | 0.221  | 3271   | 102528   | 0.254  | 0.070 | 23      | 1455526 | 0.254  | 3164.75  | 3491.051 | TRUE   | ATP synthase, H+ transmembrane subunit b (MOM70P) | 208381 | 0.841 | 9172 | 6.00E-03 | FALSE |
| 102528 | 0.254  | 23   | 1455526 | 0.221  | 3271   | 102528   | 0.254  | 0.070 | 23      | 1455526 | 0.254  | 3164.75  | 3491.051 | TRUE   | ATP synthase, H+ transmembrane subunit b (MOM70P) | 208381 | 0.841 | 9172 | 6.00E-03 | FALSE |
| 102528 | 0.254  | 23   | 1455526 | 0.221  | 3271   | 102528   | 0.254  | 0.070 | 23      | 1455526 | 0.254  | 3164.75  | 3491.051 | TRUE   | ATP synthase, H+ transmembrane subunit b (MOM70P) | 208381 | 0.841 | 9172 | 6.00E-03 | FALSE |
| 102528 | 0.254  | 23   | 1455526 | 0.221  | 3271   | 102528   | 0.254  | 0.070 | 23      | 1455526 | 0.254  | 3164.75  | 3491.051 | TRUE   | ATP synthase, H+ transmembrane subunit b (MOM70P) | 208381 | 0.841 | 9172 | 6.00E-03 | FALSE |
| 102528 | 0.254  | 23   | 1455526 | 0.221  | 3271   | 102528   | 0.254  | 0.070 | 23      | 1455526 | 0.254  | 3164.75  | 3491.051 | TRUE   | ATP synthase, H+ transmembrane subunit b (MOM70P) | 208381 | 0.841 | 9172 | 6.00E-03 | FALSE |
| 102528 | 0.254  | 23   | 1455526 | 0.221  | 3271   | 102528   | 0.254  | 0.070 | 23      | 1455526 | 0.254  | 3164.75  | 3491.051 | TRUE   | ATP synthase, H+ transmembrane subunit b (MOM70P) | 208381 | 0.841 | 9172 | 6.00E-03 | FALSE |
| 102528 | 0.254  | 23   | 1455526 | 0.221  | 3271   | 102528   | 0.254  | 0.070 | 23      | 1455526 | 0.254  | 3164.75  | 3491.051 | TRUE   | ATP synthase, H+ transmembrane subunit b (MOM70P) | 208381 | 0.841 | 9172 | 6.00E-03 | FALSE |
| 102528 | 0.254  | 23   | 1455526 | 0.221  | 3271   | 102528   | 0.254  | 0.070 | 23      | 1455526 | 0.254  | 3164.75  | 3491.051 | TRUE   | ATP synthase, H+ transmembrane subunit b (MOM70P) | 208381 | 0.841 | 9172 | 6.00E-03 | FALSE |
| 102528 | 0.254  | 23   | 1455526 | 0.221  | 3271   | 102528   | 0.254  | 0.070 | 23      | 1455526 | 0.254  | 3164.75  | 3491.051 | TRUE   | ATP synthase, H+ transmembrane subunit b (MOM70P) | 208381 | 0.841 | 9172 | 6.00E-03 | FALSE |
| 102528 | 0.254  | 23   | 1455526 | 0.221  | 3271   | 102528   | 0.254  | 0.070 | 23      | 1455526 | 0.254  | 3164.7   |          |        |                                                   |        |       |      |          |       |





|        |        |      |         |        |       |         |        |      |         |        |      |      |      |      |      |                                                                                                |                                                           |        |        |        |        |    |
|--------|--------|------|---------|--------|-------|---------|--------|------|---------|--------|------|------|------|------|------|------------------------------------------------------------------------------------------------|-----------------------------------------------------------|--------|--------|--------|--------|----|
| 103519 | 0.196  | 1111 | 1449486 | 0.264  | 4015  | 160150  | 0.216  | 573  | 144808  | -0.092 | 489  | 3217 | 1395 | 606  | FASE | carboxypeptidase 1                                                                             | MA                                                        | -282   | MA     | 203517 | MA     |    |
| 103162 | 0.163  | 2027 | 1419390 | 0.122  | 2491  | 100860  | 0.157  | 1847 | 141590  | 0.060  | 614  | 3219 | 1923 | 943  | TRUE | carboxypeptidase Y2, substrate 1A, polypeptide 9                                               | MA                                                        | -0.279 | MA     | 208453 | MA     |    |
| 151059 | -0.063 | 5715 | 1452412 | -0.211 | 1460  | 165183  | 0.076  | 5558 | 165183  | 0.076  | 389  | 3200 | 2756 | 3119 | FASE | soybean carrier protein 6 (membrane-associated transmembrane CD44), member 1                   | MA                                                        | -0.197 | MA     | 208454 | MA     |    |
| 162569 | 0.0062 | 1521 | 1424200 | 0.006  | 2895  | 160798  | 0.138  | 3501 | 162420  | -0.117 | 445  | 3282 | 1225 | 1855 | TRUE | SH3-like cytoskeletal protein 6A                                                               | MA                                                        | -0.102 | MA     | 22222  | MA     |    |
| 152644 | -0.158 | 1726 | 1416299 | -0.166 | 1704  | 162634  | 0.176  | 1529 | 162634  | -0.176 | 4825 | 3282 | 875  | 2092 | TRUE | guanine nucleotide-binding protein G12 subunit beta                                            | MA                                                        | -0.135 | MA     | 208474 | MA     |    |
| 92326  | 0.127  | 2512 | 1420000 | -0.385 | 4079  | 92268   | 0.129  | 2180 | 142000  | -0.195 | 2722 | 3284 | 72   | 309  | FASE | retinoid receptor activator protein 1                                                          | MA                                                        | -0.254 | MA     | 208475 | MA     |    |
| 161229 | 0.231  | 1950 | 1448008 | 0.142  | 1950  | 1448008 | 0.142  | 1950 | 1448008 | -0.060 | 6187 | 3285 | 125  | 2259 | FASE | Proteinase 2, cytoplasmic 1, highly basic                                                      | MA                                                        | -0.410 | MA     | 210122 | MA     |    |
| 94788  | 0.145  | 1379 | 1418822 | 0.141  | 3265  | 94788   | 0.141  | 6666 | 94788   | 0.141  | 416  | 3285 | 375  | 2028 | TRUE | Atrophin domain-containing protein 6 (MORF/BM) member 1B                                       | MA                                                        | -0.170 | MA     | 219173 | MA     |    |
| 101212 | -0.165 | 2708 | 1435958 | 0.272  | 1669  | 101212  | 0.189  | 919  | 143595  | 0.035  | 7446 | 3285 | 293  | 4174 | FASE | Acyl-coenzyme oxidase 1, nuclear D, membrane-associated protein 1 (guanine binding)            | MA                                                        | -0.188 | MA     | 219201 | MA     |    |
| 104461 | -0.241 | 474  | 1420297 | 0.022  | 77815 | 104461  | 0.022  | 3730 | 142029  | 0.130  | 1623 | 3285 | 625  | 624  | FASE | acid phosphatase 5, cytoplasmic 2                                                              | MA                                                        | -0.266 | MA     | 225988 | MA     |    |
| 96884  | -0.026 | 797  | 1417134 | 0.216  | 320   | 96884   | 0.216  | 4511 | 141734  | 0.036  | 317  | 3285 | 289  | 3402 | FASE | disordered domain 15, membrane-associated protein 2                                            | MA                                                        | -0.111 | MA     | 225989 | MA     |    |
| 94008  | -0.163 | 1023 | 1448100 | -0.152 | 1663  | 94008   | 0.109  | 1039 | 144810  | 0.176  | 6699 | 3285 | 3285 | 1031 | FASE | serpin domain, immunoglobulin domain (I), transmembrane domain (TM) and short cytoplasmic tail | MA                                                        | -0.111 | MA     | 225990 | MA     |    |
| 100026 | 0.104  | 3051 | 1430011 | 0.122  | 2172  | 100026  | 0.122  | 6445 | 143011  | 0.034  | 3111 | 3285 | 133  | 1083 | FASE | Proteinase 2, cytoplasmic 1, highly basic                                                      | MA                                                        | -0.404 | MA     | 225991 | MA     |    |
| 93046  | 0.139  | 4085 | 1422719 | 0.115  | 2775  | 93046   | 0.115  | 2323 | 142272  | 0.153  | 3862 | 3285 | 140  | 6205 | FASE | disordered domain 15, membrane-associated protein 2                                            | MA                                                        | -0.142 | MA     | 225992 | MA     |    |
| 97568  | -0.068 | 6291 | 1432899 | 0.137  | 2625  | 97568   | 0.068  | 2854 | 143289  | 0.085  | 1419 | 3285 | 149  | 1462 | FASE | Proteinase 2, cytoplasmic 1, highly basic                                                      | MA                                                        | -0.109 | MA     | 225993 | MA     |    |
| 93613  | 0.173  | 2891 | 1450172 | 0.235  | 304   | 93613   | 0.235  | 304  | 93613   | -0.235 | 2719 | 3292 | 2915 | 2183 | FASE | MAD1 homolog 3 (Drosophila)                                                                    | MA                                                        | -0.248 | MA     | 226284 | MA     |    |
| 142000 | -0.186 | 401  | 1416627 | -0.202 | 4677  | 142000  | -0.202 | 1920 | 141627  | -0.144 | 3369 | 3292 | 2490 | 2265 | FASE | Proteinase 2, cytoplasmic 1, highly basic                                                      | MA                                                        | -0.218 | MA     | 226285 | MA     |    |
| 96380  | -0.285 | 4391 | 1438144 | -0.088 | 4391  | 1438144 | -0.088 | 4391 | 1438144 | -0.088 | 6126 | 3292 | 875  | 2028 | TRUE | Proteinase 2, cytoplasmic 1, highly basic                                                      | MA                                                        | -0.218 | MA     | 226286 | MA     |    |
| 102959 | 0.114  | 3591 | 1419169 | 0.116  | 3591  | 1419169 | 0.116  | 3591 | 1419169 | 0.116  | 5411 | 3292 | 875  | 2028 | TRUE | Proteinase 2, cytoplasmic 1, highly basic                                                      | MA                                                        | -0.341 | MA     | 226287 | MA     |    |
| 162185 | 0.181  | 2821 | 1437378 | 0.122  | 319   | 162185  | 0.122  | 7124 | 143738  | 0.049  | 429  | 3294 | 3294 | 2888 | FASE | cytochrome P450 2C8                                                                            | MA                                                        | -0.209 | MA     | 226288 | MA     |    |
| 100402 | 0.189  | 1878 | 1450637 | 0.075  | 5534  | 100402  | 0.189  | 4809 | 145037  | -0.125 | 944  | 3294 | 3294 | 2888 | FASE | cytochrome P450 2C8                                                                            | MA                                                        | -0.209 | MA     | 226289 | MA     |    |
| 162259 | 0.117  | 3584 | 1425148 | 0.125  | 3570  | 162259  | 0.117  | 4275 | 142514  | 0.126  | 1793 | 3294 | 3298 | 184  | 147  | FASE                                                                                           | serpin domain 6                                           | MA     | -0.444 | MA     | 226290 | MA |
| 97211  | 0.317  | 2281 | 1450590 | 0.081  | 6209  | 97211   | 0.317  | 1938 | 145059  | 0.106  | 4628 | 3294 | 245  | 1077 | FASE | transmembrane domain 1                                                                         | MA                                                        | -0.444 | MA     | 226291 | MA     |    |
| 97182  | 0.100  | 2863 | 1447462 | 0.121  | 374   | 97182   | 0.100  | 883  | 144746  | -0.112 | 4714 | 3294 | 140  | 147  | FASE | DM5 domain, Cys 7, Wavy State University 130, unexpressed                                      | MA                                                        | -0.444 | MA     | 226292 | MA     |    |
| 96515  | 0.099  | 4013 | 1443626 | 0.102  | 5172  | 96515   | 0.099  | 2228 | 144362  | 0.106  | 2888 | 3294 | 3294 | 2888 | FASE | DM5 domain, Cys 7, Wavy State University 130, unexpressed                                      | MA                                                        | -0.444 | MA     | 226293 | MA     |    |
| 96110  | 0.013  | 892  | 1440196 | 0.205  | 892   | 1440196 | 0.013  | 1179 | 144019  | 0.240  | 2716 | 3294 | 301  | 331  | FASE | DM5 domain, Cys 7, Wavy State University 130, unexpressed                                      | MA                                                        | -0.444 | MA     | 226294 | MA     |    |
| 102659 | 0.034  | 667  | 1417351 | 0.176  | 627   | 102659  | 0.034  | 3023 | 141735  | -0.190 | 2996 | 3302 | 125  | 2450 | FASE | DM5 domain, Cys 7, Wavy State University 130, unexpressed                                      | MA                                                        | -0.444 | MA     | 226295 | MA     |    |
| 92089  | 0.233  | 1411 | 1445094 | 0.105  | 4243  | 92089   | 0.233  | 3251 | 144509  | 0.100  | 4200 | 3303 | 875  | 1349 | FASE | DM5 domain, Cys 7, Wavy State University 130, unexpressed                                      | MA                                                        | -0.444 | MA     | 226296 | MA     |    |
| 96925  | 0.186  | 2871 | 1420033 | -0.435 | 3165  | 96925   | 0.186  | 9122 | 142003  | -0.156 | 6444 | 3303 | 125  | 2196 | FASE | DM5 domain, Cys 7, Wavy State University 130, unexpressed                                      | MA                                                        | -0.444 | MA     | 226297 | MA     |    |
| 96171  | -0.292 | 800  | 1422152 | 0.132  | 728   | 96171   | -0.292 | 7899 | 142380  | -0.025 | 3145 | 3303 | 875  | 3012 | FASE | DM5 domain, Cys 7, Wavy State University 130, unexpressed                                      | MA                                                        | -0.444 | MA     | 226298 | MA     |    |
| 100003 | -0.187 | 1481 | 1416841 | 0.179  | 1849  | 100003  | -0.187 | 1849 | 141684  | -0.113 | 4732 | 3303 | 625  | 1935 | FASE | DM5 domain, Cys 7, Wavy State University 130, unexpressed                                      | MA                                                        | -0.444 | MA     | 226299 | MA     |    |
| 96621  | 0.130  | 1379 | 1416591 | 0.113  | 2274  | 96621   | 0.130  | 5404 | 141659  | 0.044  | 2165 | 3303 | 625  | 1935 | FASE | DM5 domain, Cys 7, Wavy State University 130, unexpressed                                      | MA                                                        | -0.444 | MA     | 226300 | MA     |    |
| 97424  | -0.136 | 3915 | 1417225 | 0.102  | 4143  | 97424   | -0.136 | 2283 | 144200  | -0.167 | 2888 | 3303 | 375  | 888  | FASE | DM5 domain, Cys 7, Wavy State University 130, unexpressed                                      | MA                                                        | -0.444 | MA     | 226301 | MA     |    |
| 96501  | 0.038  | 3268 | 1442791 | 0.073  | 3268  | 96501   | 0.038  | 3268 | 144279  | 0.038  | 2888 | 3303 | 375  | 888  | FASE | DM5 domain, Cys 7, Wavy State University 130, unexpressed                                      | MA                                                        | -0.444 | MA     | 226302 | MA     |    |
| 96472  | 0.144  | 281  | 1455999 | 0.488  | 41    | 96472   | 0.144  | 4265 | 145599  | -0.075 | 6114 | 3303 | 125  | 256  | FASE | DM5 domain, Cys 7, Wavy State University 130, unexpressed                                      | MA                                                        | -0.444 | MA     | 226303 | MA     |    |
| 100041 | 0.160  | 387  | 1448005 | -0.225 | 4904  | 100041  | 0.160  | 4904 | 144800  | -0.107 | 3326 | 3303 | 375  | 385  | FASE | DM5 domain, Cys 7, Wavy State University 130, unexpressed                                      | MA                                                        | -0.444 | MA     | 226304 | MA     |    |
| 101866 | 0.086  | 3021 | 1451725 | 0.009  | 5524  | 101866  | 0.086  | 5524 | 145172  | 0.045  | 3842 | 3303 | 310  | 1877 | FASE | DM5 domain, Cys 7, Wavy State University 130, unexpressed                                      | MA                                                        | -0.444 | MA     | 226305 | MA     |    |
| 103312 | 0.094  | 5200 | 1434942 | 0.140  | 5200  | 103312  | 0.094  | 5200 | 143494  | -0.031 | 4466 | 3303 | 375  | 184  | 224  | FASE                                                                                           | DM5 domain, Cys 7, Wavy State University 130, unexpressed | MA     | -0.444 | MA     | 226306 | MA |
| 101581 | 0.090  | 3721 | 1451725 | 0.009  | 8165  | 101581  | 0.090  | 8165 | 145172  | -0.233 | 1009 | 3311 | 5    | 323  | FASE | DM5 domain, Cys 7, Wavy State University 130, unexpressed                                      | MA                                                        | -0.444 | MA     | 226307 | MA     |    |
| 162216 | -0.109 | 1670 | 1416930 | 0.093  | 6241  | 162216  | -0.109 | 1466 | 141693  | 0.249  | 150  | 3311 | 5    | 323  | FASE | DM5 domain, Cys 7, Wavy State University 130, unexpressed                                      | MA                                                        | -0.444 | MA     | 226308 | MA     |    |
| 102808 | -0.027 | 4881 | 1451649 | -0.325 | 165   | 102808  | -0.027 | 4881 | 145164  | -0.133 | 357  | 3311 | 5    | 323  | FASE | DM5 domain, Cys 7, Wavy State University 130, unexpressed                                      | MA                                                        | -0.444 | MA     | 226309 | MA     |    |
| 100638 | 0.104  | 413  | 1418225 | 0.128  | 3197  | 100638  | 0.104  | 3617 | 141822  | 0.214  | 2716 | 3311 | 5    | 323  | FASE | DM5 domain, Cys 7, Wavy State University 130, unexpressed                                      | MA                                                        | -0.444 | MA     | 226310 | MA     |    |
| 96290  | -0.105 | 4192 | 1455497 | 0.217  | 3403  | 96290   | -0.105 | 3403 | 145549  | 0.296  | 5083 | 3311 | 5    | 323  | FASE | DM5 domain, Cys 7, Wavy State University 130, unexpressed                                      | MA                                                        | -0.444 | MA     | 226311 | MA     |    |
| 96851  | 0.037  | 3218 | 1420565 | 0.070  | 5023  | 96851   | 0.037  | 5023 | 142056  | -0.124 | 4629 | 3311 | 5    | 323  | FASE | DM5 domain, Cys 7, Wavy State University 130, unexpressed                                      | MA                                                        | -0.444 | MA     | 226312 | MA     |    |
| 103930 | -0.098 | 6312 | 1418154 | -0.034 | 6312  | 103930  | -0.098 | 6312 | 141815  | -0.231 | 1474 | 3311 | 5    | 323  | FASE | DM5 domain, Cys 7, Wavy State University 130, unexpressed                                      | MA                                                        | -0.444 | MA     | 226313 | MA     |    |
| 100133 | 0.000  | 8520 | 1448165 | 0.021  | 8520  | 100133  | 0.000  | 8520 | 144816  | 0.172  | 4641 | 3311 | 5    | 323  | FASE | DM5 domain, Cys 7, Wavy State University 130, unexpressed                                      | MA                                                        | -0.444 | MA     | 226314 | MA     |    |
| 102385 | -0.235 | 4170 | 1418172 | -0.021 | 4170  | 102385  | -0.235 | 4170 | 141817  | -0.021 | 4414 | 3311 | 5    | 323  | FASE | DM5 domain, Cys 7, Wavy State University 130, unexpressed                                      | MA                                                        | -0.444 | MA     | 226315 | MA     |    |
| 161583 | -0.034 | 4605 | 1423334 | -0.034 | 4605  | 161583  | -0.034 | 4605 | 142333  | -0.034 | 4605 | 3311 | 5    | 323  | FASE | DM5 domain, Cys 7, Wavy State University 130, unexpressed                                      | MA                                                        | -0.444 | MA     | 226316 | MA     |    |
| 95504  | -0.314 | 868  | 1421022 | 0.207  | 2830  | 95504   | -0.314 | 868  | 142102  | 0.194  | 6100 | 3311 | 5    | 323  | FASE | DM5 domain, Cys 7, Wavy State University 130, unexpressed                                      | MA                                                        | -0.444 | MA     | 226317 | MA     |    |
| 103826 | -0.139 | 3361 | 1450099 | 0.148  | 2060  | 103826  | -0.139 | 3361 | 145009  | 0.178  | 4410 | 3311 | 5    | 323  | FASE | DM5 domain, Cys 7, Wavy State University 130, unexpressed                                      | MA                                                        | -0.444 | MA     | 226318 | MA     |    |
| 96380  | -0.170 | 1531 | 1440175 | 0.286  | 1102  | 96380   | -0.170 | 1531 | 144017  | 0.035  | 7411 | 3311 | 5    | 323  | FASE | DM5 domain, Cys 7, Wavy State University 130, unexpressed                                      | MA                                                        | -0.444 | MA     | 226319 | MA     |    |
| 93900  | 0.148  | 3611 | 1422799 | -0.147 | 2123  | 93900   | 0.148  | 3611 | 142279  | -0.266 | 6200 | 3311 | 5    | 323  | FASE | DM5 domain, Cys 7, Wavy State University 130, unexpressed                                      | MA                                                        | -0.444 | MA     | 226320 | MA     |    |
| 100126 | 0.058  | 505  | 1422505 | 0.009  | 3286  | 100126  | 0.058  | 3286 | 142250  | 0.225  | 2833 | 3311 | 5    | 323  | FASE | DM5 domain, Cys 7, Wavy State University 130, unexpressed                                      | MA                                                        | -0.444 | MA     | 226321 | MA     |    |
| 99014  | -0.081 | 5403 | 1416979 | 0.236  | 5403  | 99014   | -0.081 | 5403 | 141697  | 0.097  | 5988 | 3311 | 5    | 323  | FASE | DM5 domain, Cys 7, Wavy State University 130, unexpressed                                      | MA                                                        | -0.444 | MA     | 226322 | MA     |    |
| 100892 | 0.219  | 1858 | 1423711 | 0.079  | 8165  | 100892  | 0.219  | 8165 | 142371  | 0.161  | 4460 | 3311 | 5    | 323  | FASE | DM5 domain, Cys 7, Wavy State University 130, unexpressed                                      | MA                                                        | -0.444 | MA     | 226323 | MA     |    |
| 104848 | -0.084 | 4122 | 1426313 | -0.124 | 4122  | 104848  | -0.084 | 4122 | 142631  | -0.124 | 4122 | 3311 | 5    | 323  | FASE | DM5 domain, Cys 7, Wavy State University 130, unexpressed                                      | MA                                                        | -0.444 | MA     | 226324 | MA     |    |
| 161229 | -0.235 | 4170 | 1418172 | -0.021 | 4170  | 161229  | -0.235 | 4170 | 14      |        |      |      |      |      |      |                                                                                                |                                                           |        |        |        |        |    |

















|       |        |      |         |        |      |       |         |       |        |         |        |       |       |     |      |                         |                          |                          |        |        |          |          |            |       |
|-------|--------|------|---------|--------|------|-------|---------|-------|--------|---------|--------|-------|-------|-----|------|-------------------------|--------------------------|--------------------------|--------|--------|----------|----------|------------|-------|
| 90268 | 0.137  | 31   | 1415364 | 0.138  | 408  | 10073 | 0.083   | 459   | 145178 | 0.117   | 685    | 384.5 | 355   | 293 | TRUE | protein domain contig 6 | 22481                    | MA                       | 0.758  | 919    | 1.64E+07 | FALSE    |            |       |
| 90269 | 0.106  | 3172 | 1421385 | 0.106  | 136  | 224   | 9473    | 0.093 | 124    | 142738  | 0.100  | 173   | 384   | 125 | 226  | 6647                    | FALSE                    | protein domain contig 15 | 153543 | MA     | 0.712    | 3397     | 1.62E+02   | FALSE |
| 90270 | 0.133  | 1560 | 1454862 | 0.134  | 103  | 1560  | 1454862 | 0.137 | 926    | 1454862 | 0.137  | 7035  | 384.5 | 304 | 604  | FALSE                   | protein domain contig 15 | 153543                   | MA     | 0.657  | 2248     | 1.18E+01 | FALSE      |       |
| 90271 | 0.041  | 524  | 1415177 | 0.041  | 138  | 524   | 1415177 | 0.038 | 109    | 1415177 | 0.039  | 628   | 384.5 | 209 | 589  | FALSE                   | protein domain contig 15 | 153543                   | MA     | 0.809  | 1072     | 1.07E+01 | FALSE      |       |
| 90272 | 0.175  | 2240 | 1422544 | 0.175  | 1067 | 2240  | 1422544 | 0.167 | 5387   | 1009    | 0.067  | 1058  | 384.5 | 257 | 703  | TRUE                    | protein domain contig 15 | 153543                   | MA     | 0.066  | 2072     | 1.07E+01 | FALSE      |       |
| 90273 | -0.098 | 3614 | 1450529 | -0.098 | 1079 | 3614  | 1450529 | 0.079 | 5817   | 9992    | 0.118  | 485   | 384.5 | 144 | 452  | FALSE                   | protein domain contig 15 | 153543                   | MA     | 0.076  | 2093     | 5.51E+01 | FALSE      |       |
| 90274 | -0.175 | 2174 | 1417083 | -0.175 | 1078 | 2174  | 1417083 | 0.128 | 6143   | 9348    | 0.103  | 604   | 384.5 | 244 | 749  | FALSE                   | protein domain contig 15 | 153543                   | MA     | 0.273  | 20044    | 5.51E+01 | FALSE      |       |
| 90275 | 0.131  | 2093 | 1442094 | 0.131  | 1021 | 2093  | 1442094 | 0.128 | 5817   | 9992    | 0.103  | 604   | 384.5 | 244 | 749  | FALSE                   | protein domain contig 15 | 153543                   | MA     | -0.015 | 2288     | 1.95E+01 | FALSE      |       |
| 90276 | -0.133 | 1643 | 1428515 | -0.133 | 1008 | 1643  | 1428515 | 0.088 | 6136   | 9645    | 0.140  | 410   | 384.5 | 230 | 609  | FALSE                   | protein domain contig 15 | 153543                   | MA     | 0.262  | 22482    | 4.92E+01 | FALSE      |       |
| 90277 | -0.090 | 3132 | 1424786 | -0.090 | 1122 | 3132  | 1424786 | 0.122 | 6359   | 9628    | 0.140  | 410   | 384.5 | 230 | 609  | FALSE                   | protein domain contig 15 | 153543                   | MA     | 0.202  | 24122    | 4.28E+03 | FALSE      |       |
| 90278 | 0.107  | 6291 | 1420384 | 0.107  | 1122 | 6291  | 1420384 | 0.122 | 6359   | 9628    | 0.140  | 410   | 384.5 | 230 | 609  | FALSE                   | protein domain contig 15 | 153543                   | MA     | 0.402  | 21520    | 5.51E+01 | FALSE      |       |
| 90279 | 0.155  | 1425 | 1418813 | 0.155  | 1080 | 1425  | 1418813 | 0.180 | 1425   | 1418813 | 0.094  | 761   | 385   | 625 | 27   | 4248                    | FALSE                    | protein domain contig 15 | 153543 | MA     | 0.246    | 20565    | 5.51E+01   | FALSE |
| 90280 | 0.036  | 6681 | 1427384 | 0.036  | 1080 | 6681  | 1427384 | 0.080 | 3955   | 5101    | 0.081  | 604   | 385   | 625 | 27   | 4248                    | FALSE                    | protein domain contig 15 | 153543 | MA     | 0.286    | 22163    | 5.51E+01   | FALSE |
| 90281 | 0.133  | 1564 | 1449685 | 0.133  | 1042 | 1564  | 1449685 | 0.106 | 5478   | 10461   | 0.023  | 1143  | 385   | 384 | 299  | 1084                    | FALSE                    | protein domain contig 15 | 153543 | MA     | -0.073   | 21937    | 5.51E+01   | FALSE |
| 90282 | -0.250 | 568  | 1433356 | -0.250 | 1046 | 568   | 1433356 | 0.043 | 7232   | 16099   | -0.068 | 1046  | 385   | 384 | 299  | 1084                    | FALSE                    | protein domain contig 15 | 153543 | MA     | -0.144   | 20575    | 5.51E+01   | FALSE |
| 90283 | -0.296 | 316  | 1449773 | -0.296 | 1097 | 316   | 1449773 | 0.097 | 4264   | 15466   | 0.090  | 604   | 385   | 375 | 284  | 985                     | FALSE                    | protein domain contig 15 | 153543 | MA     | -0.347   | 20575    | 5.51E+01   | FALSE |
| 90284 | 0.048  | 3534 | 1424212 | 0.048  | 1023 | 3534  | 1424212 | 0.023 | 4264   | 15466   | 0.090  | 604   | 385   | 375 | 284  | 985                     | FALSE                    | protein domain contig 15 | 153543 | MA     | 0.347    | 20575    | 5.51E+01   | FALSE |
| 90285 | 0.084  | 3660 | 1426285 | 0.084  | 1050 | 3660  | 1426285 | 0.089 | 4264   | 15466   | 0.090  | 604   | 385   | 375 | 284  | 985                     | FALSE                    | protein domain contig 15 | 153543 | MA     | 0.347    | 20575    | 5.51E+01   | FALSE |
| 90286 | 0.100  | 4871 | 1424237 | 0.100  | 1036 | 4871  | 1424237 | 0.136 | 4264   | 15466   | 0.090  | 604   | 385   | 375 | 284  | 985                     | FALSE                    | protein domain contig 15 | 153543 | MA     | 0.347    | 20575    | 5.51E+01   | FALSE |
| 90287 | -0.083 | 5720 | 1445475 | -0.083 | 1035 | 5720  | 1445475 | 0.035 | 4438   | 16048   | 0.086  | 604   | 385   | 375 | 284  | 985                     | FALSE                    | protein domain contig 15 | 153543 | MA     | -0.008   | 22623    | 5.51E+01   | FALSE |
| 90288 | 0.155  | 1425 | 1418813 | 0.155  | 1080 | 1425  | 1418813 | 0.180 | 1425   | 1418813 | 0.094  | 761   | 385   | 625 | 27   | 4248                    | FALSE                    | protein domain contig 15 | 153543 | MA     | 0.246    | 20565    | 5.51E+01   | FALSE |
| 90289 | 0.036  | 6681 | 1427384 | 0.036  | 1080 | 6681  | 1427384 | 0.080 | 3955   | 5101    | 0.081  | 604   | 385   | 625 | 27   | 4248                    | FALSE                    | protein domain contig 15 | 153543 | MA     | 0.286    | 22163    | 5.51E+01   | FALSE |
| 90290 | 0.133  | 1564 | 1449685 | 0.133  | 1042 | 1564  | 1449685 | 0.106 | 5478   | 10461   | 0.023  | 1143  | 385   | 384 | 299  | 1084                    | FALSE                    | protein domain contig 15 | 153543 | MA     | -0.073   | 21937    | 5.51E+01   | FALSE |
| 90291 | -0.097 | 3230 | 1427701 | -0.097 | 1081 | 3230  | 1427701 | 0.081 | 5298   | 92900   | 0.123  | 1143  | 385   | 384 | 299  | 1084                    | FALSE                    | protein domain contig 15 | 153543 | MA     | -0.073   | 21937    | 5.51E+01   | FALSE |
| 90292 | 0.044  | 6483 | 1432720 | 0.044  | 1075 | 6483  | 1432720 | 0.047 | 5824   | 10025   | 0.112  | 1046  | 385   | 375 | 284  | 985                     | FALSE                    | protein domain contig 15 | 153543 | MA     | 0.102    | 22979    | 5.51E+01   | FALSE |
| 90293 | 0.094  | 5122 | 1446086 | 0.094  | 1067 | 5122  | 1446086 | 0.067 | 5824   | 10025   | 0.112  | 1046  | 385   | 375 | 284  | 985                     | FALSE                    | protein domain contig 15 | 153543 | MA     | 0.127    | 20034    | 5.51E+01   | FALSE |
| 90294 | 0.096  | 4691 | 1418496 | 0.096  | 1024 | 4691  | 1418496 | 0.204 | 4020   | 92997   | 0.143  | 1046  | 385   | 375 | 284  | 985                     | FALSE                    | protein domain contig 15 | 153543 | MA     | 0.071    | 20667    | 5.51E+01   | FALSE |
| 90295 | 0.379  | 1078 | 1416205 | 0.379  | 1006 | 1078  | 1416205 | 0.006 | 6820   | 15175   | 0.006  | 280   | 385   | 375 | 334  | 631                     | FALSE                    | protein domain contig 15 | 153543 | MA     | 0.006    | 20157    | 5.51E+01   | FALSE |
| 90296 | 0.039  | 4429 | 1416000 | 0.039  | 1117 | 4429  | 1416000 | 0.059 | 5004   | 95906   | 0.054  | 604   | 385   | 375 | 284  | 985                     | FALSE                    | protein domain contig 15 | 153543 | MA     | -0.219   | 20003    | 5.51E+01   | FALSE |
| 90297 | 0.074  | 4147 | 1416089 | 0.074  | 1117 | 4147  | 1416089 | 0.117 | 3333   | 100260  | 0.170  | 604   | 385   | 375 | 284  | 985                     | FALSE                    | protein domain contig 15 | 153543 | MA     | 0.486    | 22644    | 5.51E+01   | FALSE |
| 90298 | 0.164  | 831  | 1416376 | 0.164  | 1040 | 831   | 1416376 | 0.140 | 4219   | 95137   | 0.170  | 3053  | 386   | 625 | 280  | 648                     | FALSE                    | protein domain contig 15 | 153543 | MA     | -0.139   | 22644    | 5.51E+01   | FALSE |
| 90299 | -0.079 | 4603 | 1422743 | -0.079 | 1012 | 4603  | 1422743 | 0.012 | 8249   | 93272   | 0.176  | 604   | 385   | 375 | 284  | 985                     | FALSE                    | protein domain contig 15 | 153543 | MA     | -0.075   | 20133    | 5.51E+01   | FALSE |
| 90300 | 0.131  | 3788 | 1426237 | 0.131  | 1070 | 3788  | 1426237 | 0.070 | 1250   | 92969   | 0.092  | 604   | 385   | 375 | 284  | 985                     | FALSE                    | protein domain contig 15 | 153543 | MA     | 0.092    | 20187    | 5.51E+01   | FALSE |
| 90301 | -0.034 | 6597 | 1423709 | -0.034 | 1171 | 6597  | 1423709 | 0.121 | 2545   | 162418  | 0.051  | 1955  | 387   | 125 | 204  | 832                     | FALSE                    | protein domain contig 15 | 153543 | MA     | -0.011   | 46023    | 5.51E+01   | FALSE |
| 90302 | 0.088  | 4439 | 1416756 | 0.088  | 1150 | 4439  | 1416756 | 0.150 | 3614   | 96254   | 0.219  | 604   | 385   | 375 | 284  | 985                     | FALSE                    | protein domain contig 15 | 153543 | MA     | 0.138    | 20850    | 5.51E+01   | FALSE |
| 90303 | -0.229 | 6103 | 1446989 | -0.229 | 1078 | 6103  | 1446989 | 0.047 | 3631   | 93988   | 0.251  | 1939  | 384   | 125 | 204  | 832                     | FALSE                    | protein domain contig 15 | 153543 | MA     | -0.221   | 20109    | 5.51E+01   | FALSE |
| 90304 | 0.078  | 4278 | 1448996 | 0.078  | 1058 | 4278  | 1448996 | 0.058 | 5413   | 16452   | 0.041  | 176   | 384   | 125 | 204  | 832                     | FALSE                    | protein domain contig 15 | 153543 | MA     | 0.078    | 20850    | 5.51E+01   | FALSE |
| 90305 | -0.059 | 4691 | 1418496 | -0.059 | 1024 | 4691  | 1418496 | 0.204 | 4020   | 92997   | 0.143  | 1046  | 385   | 375 | 284  | 985                     | FALSE                    | protein domain contig 15 | 153543 | MA     | -0.442   | 21784    | 5.51E+01   | FALSE |
| 90306 | -0.189 | 4201 | 1418465 | -0.189 | 1078 | 4201  | 1418465 | 0.040 | 5250   | 102759  | 0.121  | 1046  | 385   | 375 | 284  | 985                     | FALSE                    | protein domain contig 15 | 153543 | MA     | -0.211   | 20105    | 5.51E+01   | FALSE |
| 90307 | 0.075  | 4330 | 1422326 | 0.075  | 1078 | 4330  | 1422326 | 0.078 | 5018   | 101290  | 0.121  | 1046  | 385   | 375 | 284  | 985                     | FALSE                    | protein domain contig 15 | 153543 | MA     | 0.075    | 22929    | 5.51E+01   | FALSE |
| 90308 | -0.100 | 5035 | 1428737 | -0.100 | 1042 | 5035  | 1428737 | 0.042 | 6659   | 92484   | 0.150  | 225   | 386   | 625 | 243  | 932                     | FALSE                    | protein domain contig 15 | 153543 | MA     | 0.834    | 23894    | 5.51E+01   | FALSE |
| 90309 | 0.088  | 4031 | 1451666 | 0.088  | 1128 | 4031  | 1451666 | 0.154 | 2280   | 10058   | 0.141  | 1900  | 384   | 125 | 204  | 832                     | FALSE                    | protein domain contig 15 | 153543 | MA     | 0.017    | 20813    | 5.51E+01   | FALSE |
| 90310 | 0.038  | 4439 | 1416756 | 0.038  | 1150 | 4439  | 1416756 | 0.150 | 3614   | 96254   | 0.219  | 604   | 385   | 375 | 284  | 985                     | FALSE                    | protein domain contig 15 | 153543 | MA     | -0.323   | 21044    | 5.51E+01   | FALSE |
| 90311 | 0.088  | 4439 | 1416756 | 0.088  | 1150 | 4439  | 1416756 | 0.150 | 3614   | 96254   | 0.219  | 604   | 385   | 375 | 284  | 985                     | FALSE                    | protein domain contig 15 | 153543 | MA     | 0.442    | 20646    | 5.51E+01   | FALSE |
| 90312 | -0.193 | 6299 | 1452619 | -0.193 | 1045 | 6299  | 1452619 | 0.005 | 459    | 88890   | 0.074  | 604   | 385   | 375 | 284  | 985                     | FALSE                    | protein domain contig 15 | 153543 | MA     | -0.049   | 22848    | 5.51E+01   | FALSE |
| 90313 | 0.119  | 2589 | 1452619 | 0.119  | 1095 | 2589  | 1452619 | 0.095 | 2619   | 104010  | 0.002  | 1816  | 384   | 125 | 204  | 832                     | FALSE                    | protein domain contig 15 | 153543 | MA     | 0.066    | 21917    | 5.51E+01   | FALSE |
| 90314 | -0.040 | 5910 | 1454955 | -0.040 | 1059 | 5910  | 1454955 | 0.026 | 6644   | 16438   | 0.050  | 204   | 385   | 375 | 284  | 985                     | FALSE                    | protein domain contig 15 | 153543 | MA     | -0.124   | 23355    | 5.51E+01   | FALSE |
| 90315 | 0.002  | 5910 | 1454955 | 0.002  | 1059 | 5910  | 1454955 | 0.026 | 6644   | 16438   | 0.050  | 204   | 385   | 375 | 284  | 985                     | FALSE                    | protein domain contig 15 | 153543 | MA     | 0.141    | 20995    | 5.51E+01   | FALSE |
| 90316 | -0.115 | 2071 | 1424057 | -0.115 | 1030 | 2071  | 1424057 | 0.030 | 7703   | 96252   | 0.129  | 1046  | 385   | 375 | 284  | 985                     | FALSE                    | protein domain contig 15 | 153543 | MA     | -0.135   | 14344    | 5.51E+01   | FALSE |
| 90317 | 0.084  | 5459 | 1427216 | 0.084  | 1004 | 5459  | 1427216 | 0.004 | 6726   | 95288   | 0.133  | 3072  | 386   | 625 | 279  | 605                     | FALSE                    | protein domain contig 15 | 153543 | MA     | 0.036    | 1362     | 1.50E+02   | FALSE |
| 90318 | 0.123  | 4301 | 1427216 | 0.123  | 1078 | 4301  | 1427216 | 0.078 | 4301   | 1427216 | 0.121  | 1046  | 385   | 375 | 284  | 985                     | FALSE                    | protein domain contig 15 | 153543 | MA     | -0.188   | 21792    | 5.51E+01   | FALSE |
| 90319 | -0.384 | 9626 | 1421090 | -0.384 | 1071 | 9626  | 1421090 | 0.123 | 192    | 1460741 | 0.042  | 604   | 385   | 375 | 284  | 985                     | FALSE                    | protein domain contig 15 | 153543 | MA     | -0.046   | 20848    | 5.51E+01</ |       |

|       |        |      |         |        |      |        |        |       |         |        |      |       |      |      |       |                                                                    |                                                           |        |       |        |          |         |       |
|-------|--------|------|---------|--------|------|--------|--------|-------|---------|--------|------|-------|------|------|-------|--------------------------------------------------------------------|-----------------------------------------------------------|--------|-------|--------|----------|---------|-------|
| 90323 | 0.111  | 1450 | 1450395 | 0.058  | 6234 | 68272  | 0.029  | 3256  | 1445808 | -0.245 | 1111 | 39015 | 1097 | 8523 | FALSE | solid cell derived family 27 (genetic cotton transposon), member 5 | 206934                                                    | MA     | 0.253 | 4263   | 1162E-04 | FALSE   |       |
| 90324 | 0.040  | 6384 | 1420199 | -0.102 | 3684 | 59648  | -0.148 | 1839  | 1423808 | -0.148 | 3642 | 3900  | 375  | 1831 | 1934  | FALSE                                                              | retroviral non-retrotransposon element 23                 | 209130 | MA    | 0.611  | 312      | 274E-05 | FALSE |
| 90325 | -0.192 | 2133 | 1419520 | -0.011 | 8086 | 5      | -0.884 | 38016 | 5       | -0.884 | 2640 | 3910  | 375  | 297  | 8633  | FALSE                                                              | retroviral non-retrotransposon element 24                 | 209149 | MA    | 0.111  | 2127     | 24E-01  | FALSE |
| 90326 | 0.032  | 2604 | 1422795 | 0.009  | 2723 | 59827  | -0.066 | 5675  | 1441260 | -0.127 | 5279 | 3910  | 625  | 238  | 1481  | FALSE                                                              | retroviral non-retrotransposon element 7                  | 209158 | MA    | 0.238  | 1277     | 67E-03  | FALSE |
| 90327 | -0.182 | 2772 | 1449140 | 0.059  | 4080 | 141958 | -0.099 | 4837  | 141958  | 0.209  | 1944 | 3911  | 125  | 1960 | 7096  | FALSE                                                              | retroviral non-retrotransposon element 8                  | 209168 | MA    | 0.050  | 2584     | 3E-01   | FALSE |
| 90328 | 0.040  | 4933 | 1446971 | 0.077  | 5801 | 100740 | -0.049 | 2893  | 5       | 0.039  | 8339 | 3911  | 625  | 238  | 9756  | FALSE                                                              | retroviral non-retrotransposon element 9                  | 209177 | MA    | 0.190  | 2087     | 5E-01   | FALSE |
| 90329 | 0.040  | 4723 | 1446971 | 0.087  | 5801 | 100740 | -0.049 | 2893  | 5       | 0.039  | 8339 | 3911  | 625  | 238  | 9756  | FALSE                                                              | DNA segment, C17.0, Wayne State University 159, expressed | 209187 | MA    | 0.133  | 1950     | 11E-02  | FALSE |
| 90330 | 0.040  | 3451 | 1420188 | 0.107  | 3811 | 99974  | 0.091  | 3911  | 625     | 0.144  | 5149 | 3911  | 75   | 235  | 1636  | FALSE                                                              | retroviral non-retrotransposon element 10                 | 21809  | MA    | 0.041  | 2259     | 5E-01   | FALSE |
| 90331 | -0.115 | 3218 | 1425234 | 0.156  | 4610 | 143651 | -0.107 | 4610  | 143651  | -0.107 | 3665 | 3912  | 25   | 283  | 4076  | FALSE                                                              | RKEN DGM 150003234 gene                                   | 217816 | MA    | -0.171 | 17816    | 1E-01   | FALSE |
| 90332 | -0.145 | 3651 | 1425234 | 0.137  | 5015 | 143651 | -0.107 | 5015  | 143651  | -0.107 | 3665 | 3912  | 25   | 283  | 4076  | FALSE                                                              | retroviral non-retrotransposon element 11                 | 217825 | MA    | 0.028  | 217825   | 1E-01   | FALSE |
| 90333 | -0.111 | 3451 | 1425234 | 0.107  | 3811 | 99974  | 0.091  | 3911  | 625     | 0.144  | 5149 | 3911  | 75   | 235  | 1636  | FALSE                                                              | retroviral non-retrotransposon element 12                 | 217834 | MA    | 0.061  | 217834   | 1E-01   | FALSE |
| 90334 | -0.145 | 3651 | 1425234 | 0.137  | 5015 | 143651 | -0.107 | 5015  | 143651  | -0.107 | 3665 | 3912  | 25   | 283  | 4076  | FALSE                                                              | retroviral non-retrotransposon element 13                 | 217843 | MA    | 0.028  | 217843   | 1E-01   | FALSE |
| 90335 | -0.111 | 3451 | 1425234 | 0.107  | 3811 | 99974  | 0.091  | 3911  | 625     | 0.144  | 5149 | 3911  | 75   | 235  | 1636  | FALSE                                                              | retroviral non-retrotransposon element 14                 | 217852 | MA    | 0.061  | 217852   | 1E-01   | FALSE |
| 90336 | -0.145 | 3651 | 1425234 | 0.137  | 5015 | 143651 | -0.107 | 5015  | 143651  | -0.107 | 3665 | 3912  | 25   | 283  | 4076  | FALSE                                                              | retroviral non-retrotransposon element 15                 | 217861 | MA    | 0.028  | 217861   | 1E-01   | FALSE |
| 90337 | -0.111 | 3451 | 1425234 | 0.107  | 3811 | 99974  | 0.091  | 3911  | 625     | 0.144  | 5149 | 3911  | 75   | 235  | 1636  | FALSE                                                              | retroviral non-retrotransposon element 16                 | 217870 | MA    | 0.061  | 217870   | 1E-01   | FALSE |
| 90338 | -0.145 | 3651 | 1425234 | 0.137  | 5015 | 143651 | -0.107 | 5015  | 143651  | -0.107 | 3665 | 3912  | 25   | 283  | 4076  | FALSE                                                              | retroviral non-retrotransposon element 17                 | 217879 | MA    | 0.028  | 217879   | 1E-01   | FALSE |
| 90339 | -0.111 | 3451 | 1425234 | 0.107  | 3811 | 99974  | 0.091  | 3911  | 625     | 0.144  | 5149 | 3911  | 75   | 235  | 1636  | FALSE                                                              | retroviral non-retrotransposon element 18                 | 217888 | MA    | 0.061  | 217888   | 1E-01   | FALSE |
| 90340 | -0.145 | 3651 | 1425234 | 0.137  | 5015 | 143651 | -0.107 | 5015  | 143651  | -0.107 | 3665 | 3912  | 25   | 283  | 4076  | FALSE                                                              | retroviral non-retrotransposon element 19                 | 217897 | MA    | 0.028  | 217897   | 1E-01   | FALSE |
| 90341 | -0.111 | 3451 | 1425234 | 0.107  | 3811 | 99974  | 0.091  | 3911  | 625     | 0.144  | 5149 | 3911  | 75   | 235  | 1636  | FALSE                                                              | retroviral non-retrotransposon element 20                 | 217906 | MA    | 0.061  | 217906   | 1E-01   | FALSE |
| 90342 | -0.145 | 3651 | 1425234 | 0.137  | 5015 | 143651 | -0.107 | 5015  | 143651  | -0.107 | 3665 | 3912  | 25   | 283  | 4076  | FALSE                                                              | retroviral non-retrotransposon element 21                 | 217915 | MA    | 0.028  | 217915   | 1E-01   | FALSE |
| 90343 | -0.111 | 3451 | 1425234 | 0.107  | 3811 | 99974  | 0.091  | 3911  | 625     | 0.144  | 5149 | 3911  | 75   | 235  | 1636  | FALSE                                                              | retroviral non-retrotransposon element 22                 | 217924 | MA    | 0.061  | 217924   | 1E-01   | FALSE |
| 90344 | -0.145 | 3651 | 1425234 | 0.137  | 5015 | 143651 | -0.107 | 5015  | 143651  | -0.107 | 3665 | 3912  | 25   | 283  | 4076  | FALSE                                                              | retroviral non-retrotransposon element 23                 | 217933 | MA    | 0.028  | 217933   | 1E-01   | FALSE |
| 90345 | -0.111 | 3451 | 1425234 | 0.107  | 3811 | 99974  | 0.091  | 3911  | 625     | 0.144  | 5149 | 3911  | 75   | 235  | 1636  | FALSE                                                              | retroviral non-retrotransposon element 24                 | 217942 | MA    | 0.061  | 217942   | 1E-01   | FALSE |
| 90346 | -0.145 | 3651 | 1425234 | 0.137  | 5015 | 143651 | -0.107 | 5015  | 143651  | -0.107 | 3665 | 3912  | 25   | 283  | 4076  | FALSE                                                              | retroviral non-retrotransposon element 25                 | 217951 | MA    | 0.028  | 217951   | 1E-01   | FALSE |
| 90347 | -0.111 | 3451 | 1425234 | 0.107  | 3811 | 99974  | 0.091  | 3911  | 625     | 0.144  | 5149 | 3911  | 75   | 235  | 1636  | FALSE                                                              | retroviral non-retrotransposon element 26                 | 217960 | MA    | 0.061  | 217960   | 1E-01   | FALSE |
| 90348 | -0.145 | 3651 | 1425234 | 0.137  | 5015 | 143651 | -0.107 | 5015  | 143651  | -0.107 | 3665 | 3912  | 25   | 283  | 4076  | FALSE                                                              | retroviral non-retrotransposon element 27                 | 217969 | MA    | 0.028  | 217969   | 1E-01   | FALSE |
| 90349 | -0.111 | 3451 | 1425234 | 0.107  | 3811 | 99974  | 0.091  | 3911  | 625     | 0.144  | 5149 | 3911  | 75   | 235  | 1636  | FALSE                                                              | retroviral non-retrotransposon element 28                 | 217978 | MA    | 0.061  | 217978   | 1E-01   | FALSE |
| 90350 | -0.145 | 3651 | 1425234 | 0.137  | 5015 | 143651 | -0.107 | 5015  | 143651  | -0.107 | 3665 | 3912  | 25   | 283  | 4076  | FALSE                                                              | retroviral non-retrotransposon element 29                 | 217987 | MA    | 0.028  | 217987   | 1E-01   | FALSE |
| 90351 | -0.111 | 3451 | 1425234 | 0.107  | 3811 | 99974  | 0.091  | 3911  | 625     | 0.144  | 5149 | 3911  | 75   | 235  | 1636  | FALSE                                                              | retroviral non-retrotransposon element 30                 | 217996 | MA    | 0.061  | 217996   | 1E-01   | FALSE |
| 90352 | -0.145 | 3651 | 1425234 | 0.137  | 5015 | 143651 | -0.107 | 5015  | 143651  | -0.107 | 3665 | 3912  | 25   | 283  | 4076  | FALSE                                                              | retroviral non-retrotransposon element 31                 | 218005 | MA    | 0.028  | 218005   | 1E-01   | FALSE |
| 90353 | -0.111 | 3451 | 1425234 | 0.107  | 3811 | 99974  | 0.091  | 3911  | 625     | 0.144  | 5149 | 3911  | 75   | 235  | 1636  | FALSE                                                              | retroviral non-retrotransposon element 32                 | 218014 | MA    | 0.061  | 218014   | 1E-01   | FALSE |
| 90354 | -0.145 | 3651 | 1425234 | 0.137  | 5015 | 143651 | -0.107 | 5015  | 143651  | -0.107 | 3665 | 3912  | 25   | 283  | 4076  | FALSE                                                              | retroviral non-retrotransposon element 33                 | 218023 | MA    | 0.028  | 218023   | 1E-01   | FALSE |
| 90355 | -0.111 | 3451 | 1425234 | 0.107  | 3811 | 99974  | 0.091  | 3911  | 625     | 0.144  | 5149 | 3911  | 75   | 235  | 1636  | FALSE                                                              | retroviral non-retrotransposon element 34                 | 218032 | MA    | 0.061  | 218032   | 1E-01   | FALSE |
| 90356 | -0.145 | 3651 | 1425234 | 0.137  | 5015 | 143651 | -0.107 | 5015  | 143651  | -0.107 | 3665 | 3912  | 25   | 283  | 4076  | FALSE                                                              | retroviral non-retrotransposon element 35                 | 218041 | MA    | 0.028  | 218041   | 1E-01   | FALSE |
| 90357 | -0.111 | 3451 | 1425234 | 0.107  | 3811 | 99974  | 0.091  | 3911  | 625     | 0.144  | 5149 | 3911  | 75   | 235  | 1636  | FALSE                                                              | retroviral non-retrotransposon element 36                 | 218050 | MA    | 0.061  | 218050   | 1E-01   | FALSE |
| 90358 | -0.145 | 3651 | 1425234 | 0.137  | 5015 | 143651 | -0.107 | 5015  | 143651  | -0.107 | 3665 | 3912  | 25   | 283  | 4076  | FALSE                                                              | retroviral non-retrotransposon element 37                 | 218059 | MA    | 0.028  | 218059   | 1E-01   | FALSE |
| 90359 | -0.111 | 3451 | 1425234 | 0.107  | 3811 | 99974  | 0.091  | 3911  | 625     | 0.144  | 5149 | 3911  | 75   | 235  | 1636  | FALSE                                                              | retroviral non-retrotransposon element 38                 | 218068 | MA    | 0.061  | 218068   | 1E-01   | FALSE |
| 90360 | -0.145 | 3651 | 1425234 | 0.137  | 5015 | 143651 | -0.107 | 5015  | 143651  | -0.107 | 3665 | 3912  | 25   | 283  | 4076  | FALSE                                                              | retroviral non-retrotransposon element 39                 | 218077 | MA    | 0.028  | 218077   | 1E-01   | FALSE |
| 90361 | -0.111 | 3451 | 1425234 | 0.107  | 3811 | 99974  | 0.091  | 3911  | 625     | 0.144  | 5149 | 3911  | 75   | 235  | 1636  | FALSE                                                              | retroviral non-retrotransposon element 40                 | 218086 | MA    | 0.061  | 218086   | 1E-01   | FALSE |
| 90362 | -0.145 | 3651 | 1425234 | 0.137  | 5015 | 143651 | -0.107 | 5015  | 143651  | -0.107 | 3665 | 3912  | 25   | 283  | 4076  | FALSE                                                              | retroviral non-retrotransposon element 41                 | 218095 | MA    | 0.028  | 218095   | 1E-01   | FALSE |
| 90363 | -0.111 | 3451 | 1425234 | 0.107  | 3811 | 99974  | 0.091  | 3911  | 625     | 0.144  | 5149 | 3911  | 75   | 235  | 1636  | FALSE                                                              | retroviral non-retrotransposon element 42                 | 218104 | MA    | 0.061  | 218104   | 1E-01   | FALSE |
| 90364 | -0.145 | 3651 | 1425234 | 0.137  | 5015 | 143651 | -0.107 | 5015  | 143651  | -0.107 | 3665 | 3912  | 25   | 283  | 4076  | FALSE                                                              | retroviral non-retrotransposon element 43                 | 218113 | MA    | 0.028  | 218113   | 1E-01   | FALSE |
| 90365 | -0.111 | 3451 | 1425234 | 0.107  | 3811 | 99974  | 0.091  | 3911  | 625     | 0.144  | 5149 | 3911  | 75   | 235  | 1636  | FALSE                                                              | retroviral non-retrotransposon element 44                 | 218122 | MA    | 0.061  | 218122   | 1E-01   | FALSE |
| 90366 | -0.145 | 3651 | 1425234 | 0.137  | 5015 | 143651 | -0.107 | 5015  | 143651  | -0.107 | 3665 | 3912  | 25   | 283  | 4076  | FALSE                                                              | retroviral non-retrotransposon element 45                 | 218131 | MA    | 0.028  | 218131   | 1E-01   | FALSE |
| 90367 | -0.111 | 3451 | 1425234 | 0.107  | 3811 | 99974  | 0.091  | 3911  | 625     | 0.144  | 5149 | 3911  | 75   | 235  | 1636  | FALSE                                                              | retroviral non-retrotransposon element 46                 | 218140 | MA    | 0.061  | 218140   | 1E-01   | FALSE |
| 90368 | -0.145 | 3651 | 1425234 | 0.137  | 5015 | 143651 | -0.107 | 5015  | 143651  | -0.107 | 3665 | 3912  | 25   | 283  | 4076  | FALSE                                                              | retroviral non-retrotransposon element 47                 | 218149 | MA    | 0.028  | 218149   | 1E-01   | FALSE |
| 90369 | -0.111 | 3451 | 1425234 | 0.107  | 3811 | 99974  | 0.091  | 3911  | 625     | 0.144  | 5149 | 3911  | 75   | 235  | 1636  | FALSE                                                              | retroviral non-retrotransposon element 48                 | 218158 | MA    | 0.061  | 218158   | 1E-01   | FALSE |
| 90370 | -0.145 | 3651 | 1425234 | 0.137  | 5015 | 143651 | -0.107 | 5015  | 143651  | -0.107 | 3665 | 3912  | 25   | 283  | 4076  | FALSE                                                              | retroviral non-retrotransposon element 49                 | 218167 | MA    | 0.028  | 218167   | 1E-01   | FALSE |
| 90371 | -0.111 | 3451 | 1425234 | 0.107  | 3811 | 99974  | 0.091  | 3911  | 625     | 0.144  | 5149 | 3911  | 75   | 235  | 1636  | FALSE                                                              | retroviral non-retrotransposon element 50                 | 218176 | MA    | 0.061  | 218176   | 1E-01   | FALSE |
| 90372 | -0.145 | 3651 | 1425234 | 0.137  | 5015 | 143651 | -0.107 | 5015  | 143651  | -0.107 | 3665 | 3912  | 25   | 283  | 4076  | FALSE                                                              | retroviral non-retrotransposon element 51                 | 218185 | MA    | 0.028  | 218185   | 1E-01   | FALSE |
| 90373 | -0.111 | 3451 | 1425234 | 0.107  | 3811 | 99974  | 0.091  | 3911  | 625     | 0.144  | 5149 | 3911  | 75   | 235  | 1636  | FALSE                                                              | retroviral non-retrotransposon element 52                 | 218194 | MA    | 0.061  | 218194   | 1E-01   | FALSE |
| 90374 | -0.145 | 3651 | 1425234 | 0.137  | 5015 | 143651 | -0.107 | 5015  | 143651  | -0.107 | 3665 | 3912  | 25   | 283  | 4076  | FALSE                                                              | retroviral non-retrotransposon element 53                 | 218203 | MA    | 0.028  | 218203   | 1E-01   | FALSE |
| 90375 | -0.111 | 3451 | 1425234 | 0.107  | 3811 | 99974  | 0.091  | 3911  | 625     | 0.144  | 5149 | 3911  | 75   | 235  | 1636  | FALSE                                                              | retroviral non-retrotransposon element 54                 | 2182   |       |        |          |         |       |

|       |        |      |        |        |       |      |        |        |      |       |     |     |       |                                                    |                                                                 |       |        |       |        |         |       |
|-------|--------|------|--------|--------|-------|------|--------|--------|------|-------|-----|-----|-------|----------------------------------------------------|-----------------------------------------------------------------|-------|--------|-------|--------|---------|-------|
| 96468 | 0.003  | 4523 | 143274 | -0.141 | 0.017 | 2058 | 141488 | -0.305 | 1120 | 394   | 313 | 514 | FALSE | membrane associated protein kinase kinase kinase 2 | 23804                                                           | 0.145 | 1784   | 1     | 18E-03 | FALSE   |       |
| 96469 | -0.050 | 5515 | 141715 | -0.141 | 0.038 | 1893 | 145655 | -0.227 | 1061 | 1591  | 625 | 236 | 4674  | FALSE                                              | membrane associated protein kinase kinase kinase 2              | 20844 | -0.104 | 1154  | 1      | 18E-02  | FALSE |
| 96470 | 0.132  | 480  | 145279 | -0.081 | 0.077 | 3782 | 137113 | 0.057  | 7025 | 3962  | 125 | 240 | 9613  | FALSE                                              | membrane associated protein kinase kinase kinase 2              | 22646 | 0.168  | 1324  | 1      | 19E-02  | FALSE |
| 96471 | 0.130  | 2930 | 142014 | -0.066 | 0.096 | 2742 | 142164 | -0.108 | 4802 | 3982  | 225 | 137 | 9713  | FALSE                                              | DNA segment, chr 7, ENTPD4, 133, extended                       | 22969 | NA     | 22969 | 1      | NA      | FALSE |
| 96472 | 0.005  | 2028 | 142790 | -0.113 | 0.103 | 3163 | 142790 | -0.200 | 2487 | 38835 | 301 | 915 | 1015  | FALSE                                              | RNKM DMM 521002014, same as member 2                            | 22959 | -0.050 | 2000  | 1      | 3.0E-01 | FALSE |
| 96473 | 0.008  | 4726 | 142077 | -0.119 | 0.122 | 3815 | 142077 | -0.096 | 792  | 3942  | 25  | 323 | 68    | FALSE                                              | RNKM DMM 521002014, same as member 2                            | 22958 | -0.037 | 3070  | 1      | 5.8E-01 | FALSE |
| 96474 | 0.031  | 5389 | 142375 | -0.121 | 0.121 | 4044 | 142375 | -0.064 | 2610 | 3964  | 125 | 203 | 1594  | FALSE                                              | RNKM DMM 521001919, same as member 2                            | 22957 | -0.041 | 2587  | 1      | 3.0E-01 | FALSE |
| 96475 | 0.001  | 277  | 142371 | -0.121 | 0.121 | 313  | 91946  | -0.121 | 4044 | 3964  | 125 | 203 | 1594  | FALSE                                              | RNKM DMM 521001919, same as member 2                            | 22956 | -0.041 | 2587  | 1      | 3.0E-01 | FALSE |
| 96476 | -0.244 | 806  | 142371 | -0.121 | 0.121 | 4816 | 142371 | -0.034 | 742  | 3964  | 125 | 203 | 1594  | FALSE                                              | RNKM DMM 521001919, same as member 2                            | 22955 | -0.041 | 2587  | 1      | 3.0E-01 | FALSE |
| 96477 | 0.010  | 7950 | 141672 | -0.108 | 0.108 | 4816 | 141672 | -0.109 | 4467 | 3964  | 125 | 203 | 1594  | FALSE                                              | cellular membrane protein (membrane associated protein complex) | 22954 | -0.164 | 38195 | 1      | 4.1E-01 | FALSE |
| 96478 | -0.084 | 3551 | 144201 | -0.097 | 0.110 | 4178 | 144201 | -0.025 | 7442 | 3964  | 125 | 203 | 1594  | FALSE                                              | cellular membrane protein (membrane associated protein complex) | 22953 | -0.164 | 5056  | 1      | 2.9E-04 | FALSE |
| 96479 | -0.004 | 791  | 143279 | -0.039 | 0.039 | 6644 | 143279 | -0.422 | 5472 | 3964  | 125 | 203 | 1594  | FALSE                                              | membrane protein (membrane associated protein complex)          | 22952 | -0.184 | 5056  | 1      | 2.9E-04 | FALSE |
| 96480 | 0.135  | 5387 | 144942 | -0.092 | 0.092 | 4219 | 144942 | -0.290 | 1599 | 3964  | 125 | 203 | 1594  | FALSE                                              | MAP domain protein, member 5                                    | 22951 | -0.133 | 748   | 1      | 2.1E-03 | FALSE |
| 96481 | 0.044  | 3998 | 144854 | -0.071 | 0.071 | 3478 | 144854 | -0.425 | 1565 | 3964  | 125 | 203 | 1594  | FALSE                                              | MAP domain protein, member 5                                    | 22950 | -0.133 | 748   | 1      | 2.1E-03 | FALSE |
| 96482 | 0.078  | 5567 | 142716 | -0.103 | 0.103 | 2470 | 142716 | -0.130 | 4991 | 3964  | 125 | 203 | 1594  | FALSE                                              | MAP domain protein, member 5                                    | 22949 | -0.133 | 748   | 1      | 2.1E-03 | FALSE |
| 96483 | 0.020  | 5281 | 144629 | -0.200 | 0.105 | 2470 | 142716 | -0.130 | 4991 | 3964  | 125 | 203 | 1594  | FALSE                                              | MAP domain protein, member 5                                    | 22948 | -0.133 | 748   | 1      | 2.1E-03 | FALSE |
| 96484 | -0.201 | 1709 | 141645 | -0.113 | 0.082 | 2470 | 142716 | -0.130 | 4991 | 3964  | 125 | 203 | 1594  | FALSE                                              | MAP domain protein, member 5                                    | 22947 | -0.133 | 748   | 1      | 2.1E-03 | FALSE |
| 96485 | -0.407 | 2297 | 145048 | -0.088 | 0.088 | 2470 | 142716 | -0.130 | 4991 | 3964  | 125 | 203 | 1594  | FALSE                                              | MAP domain protein, member 5                                    | 22946 | -0.133 | 748   | 1      | 2.1E-03 | FALSE |
| 96486 | -0.048 | 6657 | 142288 | -0.038 | 0.038 | 2470 | 142716 | -0.130 | 4991 | 3964  | 125 | 203 | 1594  | FALSE                                              | MAP domain protein, member 5                                    | 22945 | -0.133 | 748   | 1      | 2.1E-03 | FALSE |
| 96487 | 0.001  | 4651 | 142288 | -0.038 | 0.038 | 2470 | 142716 | -0.130 | 4991 | 3964  | 125 | 203 | 1594  | FALSE                                              | MAP domain protein, member 5                                    | 22944 | -0.133 | 748   | 1      | 2.1E-03 | FALSE |
| 96488 | -0.244 | 806  | 142371 | -0.121 | 0.121 | 4816 | 142371 | -0.034 | 742  | 3964  | 125 | 203 | 1594  | FALSE                                              | MAP domain protein, member 5                                    | 22943 | -0.133 | 748   | 1      | 2.1E-03 | FALSE |
| 96489 | 0.013  | 1420 | 142248 | -0.004 | 0.004 | 4444 | 142248 | -0.000 | 4000 | 3971  | 175 | 333 | 4271  | FALSE                                              | MAP domain protein, member 5                                    | 22942 | -0.202 | 20846 | 1      | 4.1E-01 | FALSE |
| 96490 | -0.324 | 491  | 142844 | -0.073 | 0.073 | 5446 | 142844 | -0.083 | 4000 | 3971  | 175 | 333 | 4271  | FALSE                                              | MAP domain protein, member 5                                    | 22941 | -0.202 | 20846 | 1      | 4.1E-01 | FALSE |
| 96491 | -0.004 | 807  | 145211 | -0.100 | 0.100 | 1305 | 160709 | -0.018 | 6647 | 3971  | 175 | 333 | 4271  | FALSE                                              | MAP domain protein, member 5                                    | 22940 | -0.043 | 20846 | 1      | 4.1E-01 | FALSE |
| 96492 | -0.006 | 807  | 145211 | -0.100 | 0.100 | 1305 | 160709 | -0.018 | 6647 | 3971  | 175 | 333 | 4271  | FALSE                                              | MAP domain protein, member 5                                    | 22939 | -0.043 | 20846 | 1      | 4.1E-01 | FALSE |
| 96493 | -0.308 | 2252 | 145076 | -0.124 | 0.124 | 2504 | 510024 | -0.086 | 6647 | 3971  | 175 | 333 | 4271  | FALSE                                              | MAP domain protein, member 5                                    | 22938 | -0.043 | 20846 | 1      | 4.1E-01 | FALSE |
| 96494 | 0.130  | 2272 | 145690 | -0.198 | 0.198 | 6728 | 145690 | -0.097 | 6071 | 3971  | 175 | 333 | 4271  | FALSE                                              | MAP domain protein, member 5                                    | 22937 | -0.152 | 20846 | 1      | 4.1E-01 | FALSE |
| 96495 | -0.170 | 3065 | 145043 | -0.098 | 0.098 | 6728 | 145690 | -0.097 | 6071 | 3971  | 175 | 333 | 4271  | FALSE                                              | MAP domain protein, member 5                                    | 22936 | -0.152 | 20846 | 1      | 4.1E-01 | FALSE |
| 96496 | 0.048  | 4651 | 142478 | -0.017 | 0.017 | 9032 | 142478 | -0.227 | 1372 | 3971  | 175 | 333 | 4271  | FALSE                                              | MAP domain protein, member 5                                    | 22935 | -0.246 | 20846 | 1      | 4.1E-01 | FALSE |
| 96497 | 0.160  | 1190 | 142484 | -0.045 | 0.045 | 6188 | 101564 | -0.200 | 3315 | 3971  | 175 | 333 | 4271  | FALSE                                              | MAP domain protein, member 5                                    | 22934 | -0.060 | 20846 | 1      | 4.1E-01 | FALSE |
| 96498 | 0.075  | 5644 | 142761 | -0.142 | 0.142 | 1114 | 142761 | -0.014 | 8111 | 3971  | 175 | 333 | 4271  | FALSE                                              | MAP domain protein, member 5                                    | 22933 | -0.049 | 20846 | 1      | 4.1E-01 | FALSE |
| 96499 | 0.110  | 3998 | 144972 | -0.105 | 0.105 | 3155 | 144972 | -0.144 | 6448 | 3971  | 175 | 333 | 4271  | FALSE                                              | MAP domain protein, member 5                                    | 22932 | -0.022 | 20846 | 1      | 4.1E-01 | FALSE |
| 96500 | 0.162  | 910  | 144015 | -0.079 | 0.079 | 2457 | 142407 | -0.442 | 2120 | 3971  | 175 | 333 | 4271  | FALSE                                              | MAP domain protein, member 5                                    | 22931 | -0.245 | 20846 | 1      | 4.1E-01 | FALSE |
| 96501 | -0.006 | 5212 | 145190 | -0.103 | 0.103 | 813  | 142408 | -0.103 | 4811 | 3984  | 125 | 323 | 2211  | FALSE                                              | RNKM DMM 231001624, same as member 1                            | 22930 | NA     | 22930 | 1      | NA      | FALSE |
| 96502 | 0.192  | 4651 | 142489 | -0.010 | 0.010 | 8205 | 10289  | -0.086 | 2888 | 3984  | 125 | 323 | 2211  | FALSE                                              | RNKM DMM 231001624, same as member 1                            | 22929 | -0.078 | 24697 | 1      | 1.64    | FALSE |
| 96503 | 0.004  | 4651 | 142489 | -0.010 | 0.010 | 8205 | 10289  | -0.086 | 2888 | 3984  | 125 | 323 | 2211  | FALSE                                              | RNKM DMM 231001624, same as member 1                            | 22928 | -0.078 | 24697 | 1      | 1.64    | FALSE |
| 96504 | 0.004  | 4651 | 142489 | -0.010 | 0.010 | 8205 | 10289  | -0.086 | 2888 | 3984  | 125 | 323 | 2211  | FALSE                                              | RNKM DMM 231001624, same as member 1                            | 22927 | -0.078 | 24697 | 1      | 1.64    | FALSE |
| 96505 | 0.004  | 4651 | 142489 | -0.010 | 0.010 | 8205 | 10289  | -0.086 | 2888 | 3984  | 125 | 323 | 2211  | FALSE                                              | RNKM DMM 231001624, same as member 1                            | 22926 | -0.078 | 24697 | 1      | 1.64    | FALSE |
| 96506 | 0.004  | 4651 | 142489 | -0.010 | 0.010 | 8205 | 10289  | -0.086 | 2888 | 3984  | 125 | 323 | 2211  | FALSE                                              | RNKM DMM 231001624, same as member 1                            | 22925 | -0.078 | 24697 | 1      | 1.64    | FALSE |
| 96507 | 0.004  | 4651 | 142489 | -0.010 | 0.010 | 8205 | 10289  | -0.086 | 2888 | 3984  | 125 | 323 | 2211  | FALSE                                              | RNKM DMM 231001624, same as member 1                            | 22924 | -0.078 | 24697 | 1      | 1.64    | FALSE |
| 96508 | 0.004  | 4651 | 142489 | -0.010 | 0.010 | 8205 | 10289  | -0.086 | 2888 | 3984  | 125 | 323 | 2211  | FALSE                                              | RNKM DMM 231001624, same as member 1                            | 22923 | -0.078 | 24697 | 1      | 1.64    | FALSE |
| 96509 | 0.004  | 4651 | 142489 | -0.010 | 0.010 | 8205 | 10289  | -0.086 | 2888 | 3984  | 125 | 323 | 2211  | FALSE                                              | RNKM DMM 231001624, same as member 1                            | 22922 | -0.078 | 24697 | 1      | 1.64    | FALSE |
| 96510 | 0.004  | 4651 | 142489 | -0.010 | 0.010 | 8205 | 10289  | -0.086 | 2888 | 3984  | 125 | 323 | 2211  | FALSE                                              | RNKM DMM 231001624, same as member 1                            | 22921 | -0.078 | 24697 | 1      | 1.64    | FALSE |
| 96511 | 0.004  | 4651 | 142489 | -0.010 | 0.010 | 8205 | 10289  | -0.086 | 2888 | 3984  | 125 | 323 | 2211  | FALSE                                              | RNKM DMM 231001624, same as member 1                            | 22920 | -0.078 | 24697 | 1      | 1.64    | FALSE |
| 96512 | 0.004  | 4651 | 142489 | -0.010 | 0.010 | 8205 | 10289  | -0.086 | 2888 | 3984  | 125 | 323 | 2211  | FALSE                                              | RNKM DMM 231001624, same as member 1                            | 22919 | -0.078 | 24697 | 1      | 1.64    | FALSE |
| 96513 | 0.004  | 4651 | 142489 | -0.010 | 0.010 | 8205 | 10289  | -0.086 | 2888 | 3984  | 125 | 323 | 2211  | FALSE                                              | RNKM DMM 231001624, same as member 1                            | 22918 | -0.078 | 24697 | 1      | 1.64    | FALSE |
| 96514 | 0.004  | 4651 | 142489 | -0.010 | 0.010 | 8205 | 10289  | -0.086 | 2888 | 3984  | 125 | 323 | 2211  | FALSE                                              | RNKM DMM 231001624, same as member 1                            | 22917 | -0.078 | 24697 | 1      | 1.64    | FALSE |
| 96515 | 0.004  | 4651 | 142489 | -0.010 | 0.010 | 8205 | 10289  | -0.086 | 2888 | 3984  | 125 | 323 | 2211  | FALSE                                              | RNKM DMM 231001624, same as member 1                            | 22916 | -0.078 | 24697 | 1      | 1.64    | FALSE |
| 96516 | 0.004  | 4651 | 142489 | -0.010 | 0.010 | 8205 | 10289  | -0.086 | 2888 | 3984  | 125 | 323 | 2211  | FALSE                                              | RNKM DMM 231001624, same as member 1                            | 22915 | -0.078 | 24697 | 1      | 1.64    | FALSE |
| 96517 | 0.004  | 4651 | 142489 | -0.010 | 0.010 | 8205 | 10289  | -0.086 | 2888 | 3984  | 125 | 323 | 2211  | FALSE                                              | RNKM DMM 231001624, same as member 1                            | 22914 | -0.078 | 24697 | 1      | 1.64    | FALSE |
| 96518 | 0.004  | 4651 | 142489 | -0.010 | 0.010 | 8205 | 10289  | -0.086 | 2888 | 3984  | 125 | 323 | 2211  | FALSE                                              | RNKM DMM 231001624, same as member 1                            | 22913 | -0.078 | 24697 | 1      | 1.64    | FALSE |
| 96519 | 0.004  | 4651 | 142489 | -0.010 | 0.010 | 8205 | 10289  | -0.086 | 2888 | 3984  | 125 | 323 | 2211  | FALSE                                              | RNKM DMM 231001624, same as member 1                            | 22912 | -0.078 | 24697 | 1      | 1.64    | FALSE |
| 96520 | 0.004  | 4651 | 142489 | -0.010 | 0.010 | 8205 | 10289  | -0.086 | 2888 | 3984  | 125 | 323 | 2211  | FALSE                                              | RNKM DMM 231001624, same as member 1                            | 22911 | -0.078 | 24697 | 1      | 1.64    | FALSE |
| 96521 | 0.004  | 4651 | 142489 | -0.010 | 0.010 | 8205 | 10289  | -0.086 | 2888 | 3984  | 125 | 323 | 2211  | FALSE                                              | RNKM DMM 231001624, same as member 1                            | 22910 | -0.078 | 24697 | 1      | 1.64    | FALSE |
| 96522 | 0.004  | 4651 | 142489 | -0.010 | 0.010 | 8205 | 10289  | -0.086 | 2888 | 3984  | 125 | 323 | 2211  | FALSE                                              | RNKM DMM 231001624, same as member 1                            | 22909 | -0.078 | 24697 | 1      | 1.64    | FALSE |
| 96523 | 0.004  | 4651 | 142489 | -0.010 | 0.010 | 8205 | 10289  | -0.086 | 2888 | 3984  | 125 | 323 | 2211  | FALSE                                              | RNKM DMM 231001624, same as member 1                            | 22908 | -0.078 | 24697 | 1      | 1.64    | FALSE |
| 96524 | 0.004  | 4651 | 142489 | -0.010 | 0.010 | 8205 | 10289  | -0.086 | 2888 | 3984  | 125 | 323 | 2211  | FALSE                                              | RNKM DMM 231001624, same as member 1                            | 22907 | -0.078 | 24697 | 1      | 1.64    | FALSE |
| 96525 | 0.004  | 4651 | 142489 | -0.010 | 0.010 | 8205 | 10289  | -0.086 | 2888 | 3984  | 125 | 323 | 2211  | FALSE                                              | RNKM                                                            |       |        |       |        |         |       |





|         |        |      |         |        |       |         |       |       |         |        |       |        |          |       |                                                                                                 |                                                               |         |        |        |        |          |           |        |    |
|---------|--------|------|---------|--------|-------|---------|-------|-------|---------|--------|-------|--------|----------|-------|-------------------------------------------------------------------------------------------------|---------------------------------------------------------------|---------|--------|--------|--------|----------|-----------|--------|----|
| 100799  | 0.146  | 6484 | 1427834 | 0.137  | 1539  | 100799  | 0.043 | 4718  | 1648083 | 0.144  | 3450  | 41395  | 2077     | 3413  | TRUE                                                                                            | human immunodeficiency virus type 1 envelope protein domain 3 | 2481764 | MA     | -0.056 | 23323  | MA       | 1.132E-01 | MA     |    |
| 94449   | 0.166  | 2461 | 1450132 | 0.087  | 4689  | 1450132 | 0.183 | 623   | 1406330 | 0.089  | 6639  | 4130   | 2086     | 5249  | TRUE                                                                                            | RK2 DNA 241000223 gene                                        | 23844   | MA     | 0.133  | 1351   | MA       | 4.72E-02  | MA     |    |
| 94501   | 0.111  | 2828 | 1440362 | 0.043  | 6520  | 95051   | 0.138 | 653   | 1406330 | 0.089  | 6639  | 4130   | 2086     | 5249  | TRUE                                                                                            | RK2 DNA 241000223 gene                                        | 23844   | MA     | 0.133  | 1351   | MA       | 4.72E-02  | MA     |    |
| 94502   | 0.133  | 4860 | 1440362 | 0.106  | 4722  | 99156   | 0.102 | 4722  | 1616519 | 0.197  | 4626  | 413025 | 2179E-01 | FALSE | RK2 DNA containing 11 genes                                                                     | 222031                                                        | MA      | -0.040 | 20516  | MA     | 1.29E-01 | MA        |        |    |
| 94507   | 0.080  | 3020 | 1448801 | 0.084  | 6084  | 101071  | 0.084 | 1852  | 1444040 | 0.135  | 4638  | 4131   | 2079E-02 | TRUE  | DNA/RNA related matrix associated actin dependent repressor of chromatin, subfamily A, member 2 | 200827                                                        | MA      | 0.210  | 20827  | MA     | 0.120    | 20827     | MA     |    |
| 94508   | 0.080  | 3020 | 1448801 | 0.084  | 6084  | 101071  | 0.084 | 1852  | 1444040 | 0.135  | 4638  | 4131   | 2079E-02 | TRUE  | DNA/RNA related matrix associated actin dependent repressor of chromatin, subfamily A, member 2 | 200827                                                        | MA      | 0.210  | 20827  | MA     | 0.120    | 20827     | MA     |    |
| 1840495 | -0.107 | 4191 | 1450095 | 0.094  | 3174  | 1450095 | 0.094 | 3174  | 1450095 | -0.072 | 8228  | 41315  | 3212     | 3844  | FALSE                                                                                           | anti-viral protein repressor                                  | 200828  | MA     | 0.113  | 200828 | MA       | 0.113     | 200828 | MA |
| 92362   | -0.205 | 1331 | 1449355 | -0.245 | 4621  | 92362   | 0.104 | 4621  | 1449355 | -0.295 | 1389  | 41312  | 3212     | 3844  | FALSE                                                                                           | corepressor RNA 2, subfamily A, member 6                      | 200829  | MA     | 0.466  | 200829 | MA       | 0.466     | 200829 | MA |
| 92363   | -0.205 | 1331 | 1449355 | -0.245 | 4621  | 92363   | 0.104 | 4621  | 1449355 | -0.295 | 1389  | 41312  | 3212     | 3844  | FALSE                                                                                           | corepressor RNA 2, subfamily A, member 6                      | 200829  | MA     | 0.466  | 200829 | MA       | 0.466     | 200829 | MA |
| 92364   | -0.879 | 6    | 1450750 | 0.082  | 7249  | 92364   | 0.082 | 7249  | 92364   | 0.082  | 6376  | 41325  | 3381     | 4122  | TRUE                                                                                            | wild-type rat, induced gene 1                                 | 200830  | MA     | -0.316 | 200830 | MA       | 0.137     | 200830 | MA |
| 101148  | 0.142  | 1678 | 1450586 | 0.052  | 6575  | 101148  | 0.052 | 6575  | 101148  | 0.052  | 6376  | 41325  | 3381     | 4122  | TRUE                                                                                            | nuclear receptor subfamily 4, group A, member 2               | 200831  | MA     | -0.002 | 200831 | MA       | 0.137     | 200831 | MA |
| 97176   | 0.140  | 3899 | 1420075 | 0.081  | 4838  | 97176   | 0.081 | 4838  | 97176   | 0.081  | 4625  | 41338  | 2970     | 6526  | FALSE                                                                                           | protein, class I, type III, member 1                          | 216994  | MA     | -0.440 | 216994 | MA       | 0.440     | 216994 | MA |
| 96064   | 0.072  | 5200 | 1449929 | 0.119  | 4838  | 96064   | 0.081 | 4838  | 96064   | 0.081  | 4625  | 41338  | 2970     | 6526  | FALSE                                                                                           | protein, class I, type III, member 1                          | 216994  | MA     | -0.440 | 216994 | MA       | 0.440     | 216994 | MA |
| 98240   | 0.151  | 1753 | 1418166 | 0.074  | 6070  | 98240   | 0.087 | 6070  | 1418166 | 0.087  | 6227  | 41338  | 2970     | 6526  | FALSE                                                                                           | protein, class I, type III, member 1                          | 216994  | MA     | 0.017  | 216994 | MA       | 0.017     | 216994 | MA |
| 16038   | -0.235 | 4277 | 1440700 | 0.074  | 4670  | 16038   | 0.074 | 4670  | 16038   | 0.074  | 4670  | 41344  | 34213    | 3     | FALSE                                                                                           | RNA polymerase II, subunit 1                                  | 200832  | MA     | 0.006  | 200832 | MA       | 0.006     | 200832 | MA |
| 98360   | 0.142  | 1536 | 1428212 | 0.018  | 5818  | 98360   | 0.142 | 1536  | 1428212 | 0.018  | 5818  | 41344  | 34213    | 3     | FALSE                                                                                           | RNA polymerase II, subunit 1                                  | 200832  | MA     | 0.006  | 200832 | MA       | 0.006     | 200832 | MA |
| 10527   | 0.036  | 6652 | 1448408 | 0.199  | 7884  | 10527   | 0.036 | 6652  | 1448408 | 0.199  | 7884  | 41344  | 34213    | 3     | FALSE                                                                                           | RNA polymerase II, subunit 1                                  | 200832  | MA     | 0.630  | 200832 | MA       | 0.630     | 200832 | MA |
| 102315  | -0.147 | 3090 | 1423884 | 0.041  | 5081  | 102315  | 0.041 | 5081  | 102315  | 0.041  | 5081  | 41344  | 34213    | 3     | FALSE                                                                                           | RNA polymerase II, subunit 1                                  | 200832  | MA     | -0.370 | 200832 | MA       | 0.370     | 200832 | MA |
| 102315  | -0.147 | 3090 | 1423884 | 0.041  | 5081  | 102315  | 0.041 | 5081  | 102315  | 0.041  | 5081  | 41344  | 34213    | 3     | FALSE                                                                                           | RNA polymerase II, subunit 1                                  | 200832  | MA     | -0.370 | 200832 | MA       | 0.370     | 200832 | MA |
| 99107   | -0.024 | 7665 | 1417306 | 0.118  | 214   | 99107   | 0.069 | 214   | 99107   | 0.069  | 214   | 41344  | 34213    | 3     | FALSE                                                                                           | corepressor RNA 2, subfamily A, member 1                      | 200833  | MA     | 0.054  | 200833 | MA       | 0.054     | 200833 | MA |
| 1033020 | -0.223 | 4681 | 1424596 | 0.033  | 7493  | 1033020 | 0.033 | 7493  | 1033020 | 0.033  | 7493  | 41344  | 34213    | 3     | FALSE                                                                                           | corepressor RNA 2, subfamily A, member 1                      | 200833  | MA     | 0.054  | 200833 | MA       | 0.054     | 200833 | MA |
| 98553   | -0.223 | 1568 | 1416272 | 0.105  | 4061  | 98553   | 0.105 | 4061  | 98553   | 0.105  | 4061  | 41344  | 34213    | 3     | FALSE                                                                                           | corepressor RNA 2, subfamily A, member 1                      | 200833  | MA     | 0.054  | 200833 | MA       | 0.054     | 200833 | MA |
| 99292   | -0.142 | 7054 | 1417144 | -0.148 | 3381  | 99292   | 0.148 | 3381  | 99292   | 0.148  | 3381  | 41344  | 34213    | 3     | FALSE                                                                                           | corepressor RNA 2, subfamily A, member 1                      | 200833  | MA     | 0.109  | 200833 | MA       | 0.109     | 200833 | MA |
| 100084  | -0.287 | 1564 | 1456725 | 0.120  | 4109  | 100084  | 0.120 | 4109  | 100084  | 0.120  | 4109  | 41344  | 34213    | 3     | FALSE                                                                                           | corepressor RNA 2, subfamily A, member 1                      | 200833  | MA     | 0.210  | 200833 | MA       | 0.210     | 200833 | MA |
| 101777  | 0.097  | 2866 | 1427783 | 0.046  | 6432  | 101777  | 0.046 | 6432  | 101777  | 0.046  | 6432  | 41344  | 34213    | 3     | FALSE                                                                                           | corepressor RNA 2, subfamily A, member 1                      | 200833  | MA     | 0.146  | 200833 | MA       | 0.146     | 200833 | MA |
| 103459  | 0.000  | 8409 | 1450204 | 0.102  | 2201  | 103459  | 0.102 | 2201  | 103459  | 0.102  | 2201  | 41344  | 34213    | 3     | FALSE                                                                                           | corepressor RNA 2, subfamily A, member 1                      | 200833  | MA     | 0.199  | 200833 | MA       | 0.199     | 200833 | MA |
| 97285   | 0.036  | 4401 | 1424446 | 0.093  | 58983 | 97285   | 0.093 | 58983 | 97285   | 0.093  | 58983 | 41344  | 34213    | 3     | FALSE                                                                                           | corepressor RNA 2, subfamily A, member 1                      | 200833  | MA     | 0.130  | 200833 | MA       | 0.130     | 200833 | MA |
| 94699   | 0.036  | 4401 | 1424446 | 0.093  | 58983 | 94699   | 0.093 | 58983 | 94699   | 0.093  | 58983 | 41344  | 34213    | 3     | FALSE                                                                                           | corepressor RNA 2, subfamily A, member 1                      | 200833  | MA     | 0.130  | 200833 | MA       | 0.130     | 200833 | MA |
| 94699   | 0.036  | 4401 | 1424446 | 0.093  | 58983 | 94699   | 0.093 | 58983 | 94699   | 0.093  | 58983 | 41344  | 34213    | 3     | FALSE                                                                                           | corepressor RNA 2, subfamily A, member 1                      | 200833  | MA     | 0.130  | 200833 | MA       | 0.130     | 200833 | MA |
| 101065  | 0.137  | 1999 | 1455147 | 0.044  | 6059  | 101065  | 0.044 | 6059  | 101065  | 0.044  | 6059  | 41344  | 34213    | 3     | FALSE                                                                                           | corepressor RNA 2, subfamily A, member 1                      | 200833  | MA     | 0.240  | 200833 | MA       | 0.240     | 200833 | MA |
| 101065  | 0.137  | 1999 | 1455147 | 0.044  | 6059  | 101065  | 0.044 | 6059  | 101065  | 0.044  | 6059  | 41344  | 34213    | 3     | FALSE                                                                                           | corepressor RNA 2, subfamily A, member 1                      | 200833  | MA     | 0.240  | 200833 | MA       | 0.240     | 200833 | MA |
| 99749   | -0.038 | 7233 | 1428112 | -0.119 | 6620  | 99749   | 0.076 | 6620  | 99749   | 0.076  | 6620  | 41344  | 34213    | 3     | FALSE                                                                                           | corepressor RNA 2, subfamily A, member 1                      | 200833  | MA     | -0.048 | 200833 | MA       | 0.048     | 200833 | MA |
| 99665   | -0.018 | 5288 | 1428254 | -0.074 | 4254  | 99665   | 0.074 | 4254  | 99665   | 0.074  | 4254  | 41344  | 34213    | 3     | FALSE                                                                                           | corepressor RNA 2, subfamily A, member 1                      | 200833  | MA     | 0.402  | 200833 | MA       | 0.402     | 200833 | MA |
| 99213   | -0.082 | 5288 | 1428254 | -0.074 | 4254  | 99213   | 0.074 | 4254  | 99213   | 0.074  | 4254  | 41344  | 34213    | 3     | FALSE                                                                                           | corepressor RNA 2, subfamily A, member 1                      | 200833  | MA     | 0.402  | 200833 | MA       | 0.402     | 200833 | MA |
| 99213   | -0.082 | 5288 | 1428254 | -0.074 | 4254  | 99213   | 0.074 | 4254  | 99213   | 0.074  | 4254  | 41344  | 34213    | 3     | FALSE                                                                                           | corepressor RNA 2, subfamily A, member 1                      | 200833  | MA     | 0.402  | 200833 | MA       | 0.402     | 200833 | MA |
| 98413   | -0.031 | 7352 | 1464319 | -0.080 | 4135  | 98413   | 0.031 | 4135  | 98413   | 0.031  | 4135  | 41344  | 34213    | 3     | FALSE                                                                                           | corepressor RNA 2, subfamily A, member 1                      | 200833  | MA     | 0.214  | 200833 | MA       | 0.214     | 200833 | MA |
| 102106  | 0.102  | 3242 | 1421844 | 0.135  | 3107  | 102106  | 0.135 | 3107  | 102106  | 0.135  | 3107  | 41344  | 34213    | 3     | FALSE                                                                                           | corepressor RNA 2, subfamily A, member 1                      | 200833  | MA     | 0.094  | 200833 | MA       | 0.094     | 200833 | MA |
| 142354  | 0.032  | 7039 | 1423377 | 0.109  | 2494  | 142354  | 0.109 | 2494  | 142354  | 0.109  | 2494  | 41344  | 34213    | 3     | FALSE                                                                                           | corepressor RNA 2, subfamily A, member 1                      | 200833  | MA     | 0.615  | 200833 | MA       | 0.615     | 200833 | MA |
| 96071   | 0.047  | 1422 | 1490535 | 0.169  | 1622  | 96071   | 0.169 | 1622  | 1490535 | 0.169  | 1622  | 41344  | 34213    | 3     | FALSE                                                                                           | corepressor RNA 2, subfamily A, member 1                      | 200833  | MA     | 0.094  | 200833 | MA       | 0.094     | 200833 | MA |
| 96113   | -0.201 | 1128 | 1448238 | -0.099 | 5799  | 96113   | 0.099 | 5799  | 96113   | 0.099  | 5799  | 41344  | 34213    | 3     | FALSE                                                                                           | corepressor RNA 2, subfamily A, member 1                      | 200833  | MA     | -1.941 | 200833 | MA       | 1.941     | 200833 | MA |
| 96113   | -0.201 | 1128 | 1448238 | -0.099 | 5799  | 96113   | 0.099 | 5799  | 96113   | 0.099  | 5799  | 41344  | 34213    | 3     | FALSE                                                                                           | corepressor RNA 2, subfamily A, member 1                      | 200833  | MA     | -1.941 | 200833 | MA       | 1.941     | 200833 | MA |
| 96573   | 0.094  | 5380 | 1422474 | 0.148  | 3051  | 96573   | 0.148 | 3051  | 96573   | 0.148  | 3051  | 41344  | 34213    | 3     | FALSE                                                                                           | corepressor RNA 2, subfamily A, member 1                      | 200833  | MA     | -0.037 | 200833 | MA       | 0.037     | 200833 | MA |
| 96573   | 0.094  | 5380 | 1422474 | 0.148  | 3051  | 96573   | 0.148 | 3051  | 96573   | 0.148  | 3051  | 41344  | 34213    | 3     | FALSE                                                                                           | corepressor RNA 2, subfamily A, member 1                      | 200833  | MA     | -0.037 | 200833 | MA       | 0.037     | 200833 | MA |
| 96580   | -0.178 | 2571 | 1426854 | -0.072 | 4371  | 96580   | 0.072 | 4371  | 1426854 | 0.072  | 4371  | 41344  | 34213    | 3     | FALSE                                                                                           | corepressor RNA 2, subfamily A, member 1                      | 200833  | MA     | 0.140  | 200833 | MA       | 0.140     | 200833 | MA |
| 96580   | -0.178 | 2571 | 1426854 | -0.072 | 4371  | 96580   | 0.072 | 4371  | 1426854 | 0.072  | 4371  | 41344  | 34213    | 3     | FALSE                                                                                           | corepressor RNA 2, subfamily A, member 1                      | 200833  | MA     | 0.140  | 200833 | MA       | 0.140     | 200833 | MA |
| 96580   | -0.178 | 2571 | 1426854 | -0.072 | 4371  | 96580   | 0.072 | 4371  | 1426854 | 0.072  | 4371  | 41     |          |       |                                                                                                 |                                                               |         |        |        |        |          |           |        |    |





|        |        |        |        |        |        |        |        |        |        |        |        |        |        |        |        |        |        |        |        |        |        |        |        |        |        |        |        |        |        |        |        |        |        |        |        |        |        |        |        |        |        |        |        |        |        |        |        |        |        |        |        |        |        |        |        |        |        |        |        |        |        |        |        |        |        |        |        |        |        |        |        |        |        |        |        |        |        |        |        |        |        |        |        |        |        |        |        |        |        |        |        |        |        |        |        |        |        |        |        |        |        |        |        |        |        |        |        |        |        |        |        |        |        |        |        |        |        |        |        |        |        |        |        |        |        |        |        |        |        |        |        |        |        |        |        |        |        |        |        |        |        |        |        |        |        |        |        |        |        |        |        |        |        |        |        |        |        |        |        |        |        |        |        |        |        |        |        |        |        |        |        |        |        |        |        |        |        |        |        |        |        |        |        |        |        |        |        |        |        |        |        |        |        |        |        |        |        |        |        |        |        |        |        |        |        |        |        |        |        |        |        |        |        |        |        |        |        |        |        |        |        |        |        |        |        |        |        |        |        |        |        |        |        |        |        |        |        |        |        |        |        |        |        |        |        |        |        |        |        |        |        |        |        |        |        |        |        |        |        |        |        |        |        |        |        |        |        |        |        |        |        |        |        |        |        |        |        |        |        |        |        |        |        |        |        |        |        |        |        |        |        |        |        |        |        |        |        |        |        |        |        |        |        |        |        |        |        |        |        |        |        |        |        |        |        |        |        |        |        |        |        |        |        |        |        |        |        |        |        |        |        |        |        |        |        |        |        |        |        |        |        |        |        |        |        |        |        |        |        |        |        |        |        |        |        |        |        |        |        |        |        |        |        |        |        |        |        |        |        |        |        |        |        |        |        |        |        |        |        |        |        |        |        |        |        |        |        |        |        |        |        |        |        |        |        |        |        |        |        |        |        |        |        |        |        |        |        |        |        |        |        |        |        |        |        |        |        |        |        |        |        |        |        |        |        |        |        |        |        |        |        |        |        |        |        |        |        |        |        |        |        |        |        |        |        |        |        |        |        |        |        |        |        |        |        |        |        |        |        |        |        |        |        |        |        |        |        |        |        |        |        |        |        |        |        |        |        |        |        |        |        |        |        |        |        |        |        |        |        |        |        |        |        |        |        |        |        |        |        |        |        |        |        |        |        |        |        |        |        |        |        |        |        |        |        |        |        |        |        |        |        |        |        |        |        |        |        |        |        |        |        |        |        |        |        |        |        |        |        |        |        |        |        |        |        |        |        |        |        |        |        |        |        |        |        |        |        |        |        |        |        |        |        |        |        |        |        |        |        |        |        |        |        |        |        |        |        |        |        |        |        |        |        |        |        |        |        |        |        |        |        |        |        |        |        |        |        |        |        |        |        |        |        |        |        |        |        |        |        |        |        |        |        |        |        |        |        |        |        |        |        |        |        |        |        |        |        |        |        |        |        |        |        |        |        |        |        |        |        |        |        |        |        |        |        |        |        |        |        |        |        |        |        |        |        |        |        |        |        |        |        |        |        |        |        |        |        |        |        |        |        |        |        |        |        |        |        |        |        |        |        |        |        |        |        |        |        |        |        |        |        |        |        |        |        |        |        |        |        |        |        |        |        |        |        |        |        |        |        |        |        |        |        |        |        |        |        |        |        |        |        |        |        |        |        |        |        |        |        |        |        |        |        |        |        |        |        |        |        |        |        |        |        |        |        |        |        |        |        |        |        |        |        |        |        |        |        |        |        |        |        |        |        |        |        |        |        |        |        |        |        |        |        |        |        |        |        |        |        |        |        |        |        |        |        |        |        |        |        |        |        |        |        |        |        |        |        |        |        |        |        |        |        |        |        |        |        |        |        |        |        |        |        |        |        |        |        |        |        |        |        |        |        |        |        |        |        |        |        |        |        |        |        |        |        |        |        |        |        |        |        |        |        |        |        |        |        |        |        |        |        |        |        |        |        |        |        |        |        |        |        |        |        |        |        |        |        |        |        |        |        |        |        |        |        |        |        |        |        |        |        |        |        |        |        |        |        |        |        |        |        |        |        |        |        |        |        |        |        |        |        |        |        |        |        |        |        |        |        |        |        |        |        |        |        |        |        |        |        |        |        |        |        |        |        |        |        |        |        |        |        |        |        |        |        |        |        |        |        |        |        |        |        |        |        |        |        |        |        |        |        |        |        |        |        |        |        |        |        |        |        |        |        |        |        |        |        |        |        |        |        |        |        |        |        |        |        |        |        |        |        |        |        |        |        |        |        |        |        |        |        |        |        |        |        |        |        |        |        |        |        |        |        |        |        |        |        |        |        |        |        |        |        |        |        |        |        |        |        |        |        |        |        |        |        |        |        |        |        |        |        |        |        |        |        |        |        |        |        |        |        |        |        |        |        |        |        |        |        |        |        |        |        |        |        |        |        |        |        |        |        |        |        |        |        |        |        |        |        |        |        |        |        |        |        |        |        |        |        |        |        |        |        |        |        |        |        |        |        |        |        |        |        |        |        |        |        |        |        |        |        |        |        |        |        |        |        |        |        |        |        |        |        |        |        |        |        |        |        |        |        |  |
|--------|--------|--------|--------|--------|--------|--------|--------|--------|--------|--------|--------|--------|--------|--------|--------|--------|--------|--------|--------|--------|--------|--------|--------|--------|--------|--------|--------|--------|--------|--------|--------|--------|--------|--------|--------|--------|--------|--------|--------|--------|--------|--------|--------|--------|--------|--------|--------|--------|--------|--------|--------|--------|--------|--------|--------|--------|--------|--------|--------|--------|--------|--------|--------|--------|--------|--------|--------|--------|--------|--------|--------|--------|--------|--------|--------|--------|--------|--------|--------|--------|--------|--------|--------|--------|--------|--------|--------|--------|--------|--------|--------|--------|--------|--------|--------|--------|--------|--------|--------|--------|--------|--------|--------|--------|--------|--------|--------|--------|--------|--------|--------|--------|--------|--------|--------|--------|--------|--------|--------|--------|--------|--------|--------|--------|--------|--------|--------|--------|--------|--------|--------|--------|--------|--------|--------|--------|--------|--------|--------|--------|--------|--------|--------|--------|--------|--------|--------|--------|--------|--------|--------|--------|--------|--------|--------|--------|--------|--------|--------|--------|--------|--------|--------|--------|--------|--------|--------|--------|--------|--------|--------|--------|--------|--------|--------|--------|--------|--------|--------|--------|--------|--------|--------|--------|--------|--------|--------|--------|--------|--------|--------|--------|--------|--------|--------|--------|--------|--------|--------|--------|--------|--------|--------|--------|--------|--------|--------|--------|--------|--------|--------|--------|--------|--------|--------|--------|--------|--------|--------|--------|--------|--------|--------|--------|--------|--------|--------|--------|--------|--------|--------|--------|--------|--------|--------|--------|--------|--------|--------|--------|--------|--------|--------|--------|--------|--------|--------|--------|--------|--------|--------|--------|--------|--------|--------|--------|--------|--------|--------|--------|--------|--------|--------|--------|--------|--------|--------|--------|--------|--------|--------|--------|--------|--------|--------|--------|--------|--------|--------|--------|--------|--------|--------|--------|--------|--------|--------|--------|--------|--------|--------|--------|--------|--------|--------|--------|--------|--------|--------|--------|--------|--------|--------|--------|--------|--------|--------|--------|--------|--------|--------|--------|--------|--------|--------|--------|--------|--------|--------|--------|--------|--------|--------|--------|--------|--------|--------|--------|--------|--------|--------|--------|--------|--------|--------|--------|--------|--------|--------|--------|--------|--------|--------|--------|--------|--------|--------|--------|--------|--------|--------|--------|--------|--------|--------|--------|--------|--------|--------|--------|--------|--------|--------|--------|--------|--------|--------|--------|--------|--------|--------|--------|--------|--------|--------|--------|--------|--------|--------|--------|--------|--------|--------|--------|--------|--------|--------|--------|--------|--------|--------|--------|--------|--------|--------|--------|--------|--------|--------|--------|--------|--------|--------|--------|--------|--------|--------|--------|--------|--------|--------|--------|--------|--------|--------|--------|--------|--------|--------|--------|--------|--------|--------|--------|--------|--------|--------|--------|--------|--------|--------|--------|--------|--------|--------|--------|--------|--------|--------|--------|--------|--------|--------|--------|--------|--------|--------|--------|--------|--------|--------|--------|--------|--------|--------|--------|--------|--------|--------|--------|--------|--------|--------|--------|--------|--------|--------|--------|--------|--------|--------|--------|--------|--------|--------|--------|--------|--------|--------|--------|--------|--------|--------|--------|--------|--------|--------|--------|--------|--------|--------|--------|--------|--------|--------|--------|--------|--------|--------|--------|--------|--------|--------|--------|--------|--------|--------|--------|--------|--------|--------|--------|--------|--------|--------|--------|--------|--------|--------|--------|--------|--------|--------|--------|--------|--------|--------|--------|--------|--------|--------|--------|--------|--------|--------|--------|--------|--------|--------|--------|--------|--------|--------|--------|--------|--------|--------|--------|--------|--------|--------|--------|--------|--------|--------|--------|--------|--------|--------|--------|--------|--------|--------|--------|--------|--------|--------|--------|--------|--------|--------|--------|--------|--------|--------|--------|--------|--------|--------|--------|--------|--------|--------|--------|--------|--------|--------|--------|--------|--------|--------|--------|--------|--------|--------|--------|--------|--------|--------|--------|--------|--------|--------|--------|--------|--------|--------|--------|--------|--------|--------|--------|--------|--------|--------|--------|--------|--------|--------|--------|--------|--------|--------|--------|--------|--------|--------|--------|--------|--------|--------|--------|--------|--------|--------|--------|--------|--------|--------|--------|--------|--------|--------|--------|--------|--------|--------|--------|--------|--------|--------|--------|--------|--------|--------|--------|--------|--------|--------|--------|--------|--------|--------|--------|--------|--------|--------|--------|--------|--------|--------|--------|--------|--------|--------|--------|--------|--------|--------|--------|--------|--------|--------|--------|--------|--------|--------|--------|--------|--------|--------|--------|--------|--------|--------|--------|--------|--------|--------|--------|--------|--------|--------|--------|--------|--------|--------|--------|--------|--------|--------|--------|--------|--------|--------|--------|--------|--------|--------|--------|--------|--------|--------|--------|--------|--------|--------|--------|--------|--------|--------|--------|--------|--------|--------|--------|--------|--------|--------|--------|--------|--------|--------|--------|--------|--------|--------|--------|--------|--------|--------|--------|--------|--------|--------|--------|--------|--------|--------|--------|--------|--------|--------|--------|--------|--------|--------|--------|--------|--------|--------|--------|--------|--------|--------|--------|--------|--------|--------|--------|--------|--------|--------|--------|--------|--------|--------|--------|--------|--------|--------|--------|--------|--------|--------|--------|--------|--------|--------|--------|--------|--------|--------|--------|--------|--------|--------|--------|--------|--------|--------|--------|--------|--------|--------|--------|--------|--------|--------|--------|--------|--------|--------|--------|--------|--------|--------|--------|--------|--------|--------|--------|--------|--------|--------|--------|--------|--------|--------|--------|--------|--------|--------|--------|--------|--------|--------|--------|--------|--------|--------|--------|--------|--------|--------|--------|--------|--------|--------|--------|--------|--------|--------|--------|--------|--------|--------|--------|--------|--------|--------|--------|--------|--------|--------|--------|--------|--------|--------|--------|--------|--------|--------|--------|--------|--------|--------|--------|--------|--------|--------|--------|--------|--------|--------|--------|--------|--------|--------|--------|--------|--------|--------|--------|--------|--------|--------|--------|--------|--------|--------|--------|--------|--------|--------|--------|--------|--------|--------|--------|--------|--------|--------|--------|--------|--------|--------|--------|--------|--------|--------|--------|--------|--------|--------|--------|--------|--------|--------|--------|--------|--------|--------|--------|--------|--------|--------|--------|--------|--------|--------|--------|--------|--------|--------|--------|--------|--------|--------|--------|--------|--------|--------|--------|--------|--------|--------|--------|--------|--------|--------|--------|--------|--------|--------|--------|--------|--------|--------|--------|--------|--------|--------|--------|--------|--------|--------|--------|--------|--------|--------|--------|--------|--------|--------|--------|--------|--------|--------|--------|--------|--------|--------|--------|--------|--------|--------|--------|--------|--------|--------|--------|--------|--------|--------|--------|--------|--------|--------|--------|--------|--------|--------|--------|--------|--------|--------|--------|--------|--------|--------|--------|--------|--------|--------|--------|--------|--------|--------|--------|--------|--------|--------|--------|--------|--------|--------|--------|--------|--------|--------|--------|--------|--------|--------|--------|--------|--------|--------|--------|--------|--------|--------|--------|--------|--------|--------|--------|--------|--------|--------|--------|--------|--------|--------|--------|--------|--------|--------|--------|--------|--------|--------|--------|--------|--------|--------|--------|--------|--------|--------|--------|--------|--------|--------|--------|--------|--------|--------|--------|--------|--------|--------|--------|--------|--------|--------|--------|--------|--------|--------|--------|--------|--------|--------|--------|--------|--------|--------|--------|--------|--|
| 102955 | 103025 | 103095 | 103165 | 103235 | 103305 | 103375 | 103445 | 103515 | 103585 | 103655 | 103725 | 103795 | 103865 | 103935 | 104005 | 104075 | 104145 | 104215 | 104285 | 104355 | 104425 | 104495 | 104565 | 104635 | 104705 | 104775 | 104845 | 104915 | 104985 | 105055 | 105125 | 105195 | 105265 | 105335 | 105405 | 105475 | 105545 | 105615 | 105685 | 105755 | 105825 | 105895 | 105965 | 106035 | 106105 | 106175 | 106245 | 106315 | 106385 | 106455 | 106525 | 106595 | 106665 | 106735 | 106805 | 106875 | 106945 | 107015 | 107085 | 107155 | 107225 | 107295 | 107365 | 107435 | 107505 | 107575 | 107645 | 107715 | 107785 | 107855 | 107925 | 107995 | 108065 | 108135 | 108205 | 108275 | 108345 | 108415 | 108485 | 108555 | 108625 | 108695 | 108765 | 108835 | 108905 | 108975 | 109045 | 109115 | 109185 | 109255 | 109325 | 109395 | 109465 | 109535 | 109605 | 109675 | 109745 | 109815 | 109885 | 109955 | 110025 | 110095 | 110165 | 110235 | 110305 | 110375 | 110445 | 110515 | 110585 | 110655 | 110725 | 110795 | 110865 | 110935 | 111005 | 111075 | 111145 | 111215 | 111285 | 111355 | 111425 | 111495 | 111565 | 111635 | 111705 | 111775 | 111845 | 111915 | 111985 | 112055 | 112125 | 112195 | 112265 | 112335 | 112405 | 112475 | 112545 | 112615 | 112685 | 112755 | 112825 | 112895 | 112965 | 113035 | 113105 | 113175 | 113245 | 113315 | 113385 | 113455 | 113525 | 113595 | 113665 | 113735 | 113805 | 113875 | 113945 | 114015 | 114085 | 114155 | 114225 | 114295 | 114365 | 114435 | 114505 | 114575 | 114645 | 114715 | 114785 | 114855 | 114925 | 114995 | 115065 | 115135 | 115205 | 115275 | 115345 | 115415 | 115485 | 115555 | 115625 | 115695 | 115765 | 115835 | 115905 | 115975 | 116045 | 116115 | 116185 | 116255 | 116325 | 116395 | 116465 | 116535 | 116605 | 116675 | 116745 | 116815 | 116885 | 116955 | 117025 | 117095 | 117165 | 117235 | 117305 | 117375 | 117445 | 117515 | 117585 | 117655 | 117725 | 117795 | 117865 | 117935 | 118005 | 118075 | 118145 | 118215 | 118285 | 118355 | 118425 | 118495 | 118565 | 118635 | 118705 | 118775 | 118845 | 118915 | 119000 | 119085 | 119175 | 119265 | 119355 | 119445 | 119535 | 119625 | 119715 | 119805 | 119895 | 119985 | 120075 | 120165 | 120255 | 120345 | 120435 | 120525 | 120615 | 120705 | 120795 | 120885 | 120975 | 121065 | 121155 | 121245 | 121335 | 121425 | 121515 | 121605 | 121695 | 121785 | 121875 | 121965 | 122055 | 122145 | 122235 | 122325 | 122415 | 122505 | 122595 | 122685 | 122775 | 122865 | 122955 | 123045 | 123135 | 123225 | 123315 | 123405 | 123495 | 123585 | 123675 | 123765 | 123855 | 123945 | 124035 | 124125 | 124215 | 124305 | 124395 | 124485 | 124575 | 124665 | 124755 | 124845 | 124935 | 125025 | 125115 | 125205 | 125295 | 125385 | 125475 | 125565 | 125655 | 125745 | 125835 | 125925 | 126015 | 126105 | 126195 | 126285 | 126375 | 126465 | 126555 | 126645 | 126735 | 126825 | 126915 | 127005 | 127095 | 127185 | 127275 | 127365 | 127455 | 127545 | 127635 | 127725 | 127815 | 127905 | 127995 | 128085 | 128175 | 128265 | 128355 | 128445 | 128535 | 128625 | 128715 | 128805 | 128895 | 128985 | 129075 | 129165 | 129255 | 129345 | 129435 | 129525 | 129615 | 129705 | 129795 | 129885 | 129975 | 130065 | 130155 | 130245 | 130335 | 130425 | 130515 | 130605 | 130695 | 130785 | 130875 | 130965 | 131055 | 131145 | 131235 | 131325 | 131415 | 131505 | 131595 | 131685 | 131775 | 131865 | 131955 | 132045 | 132135 | 132225 | 132315 | 132405 | 132495 | 132585 | 132675 | 132765 | 132855 | 132945 | 133035 | 133125 | 133215 | 133305 | 133395 | 133485 | 133575 | 133665 | 133755 | 133845 | 133935 | 134025 | 134115 | 134205 | 134295 | 134385 | 134475 | 134565 | 134655 | 134745 | 134835 | 134925 | 135015 | 135105 | 135195 | 135285 | 135375 | 135465 | 135555 | 135645 | 135735 | 135825 | 135915 | 136005 | 136095 | 136185 | 136275 | 136365 | 136455 | 136545 | 136635 | 136725 | 136815 | 136905 | 136995 | 137085 | 137175 | 137265 | 137355 | 137445 | 137535 | 137625 | 137715 | 137805 | 137895 | 137985 | 138075 | 138165 | 138255 | 138345 | 138435 | 138525 | 138615 | 138705 | 138795 | 138885 | 138975 | 139065 | 139155 | 139245 | 139335 | 139425 | 139515 | 139605 | 139695 | 139785 | 139875 | 139965 | 140055 | 140145 | 140235 | 140325 | 140415 | 140505 | 140595 | 140685 | 140775 | 140865 | 140955 | 141045 | 141135 | 141225 | 141315 | 141405 | 141495 | 141585 | 141675 | 141765 | 141855 | 141945 | 142035 | 142125 | 142215 | 142305 | 142395 | 142485 | 142575 | 142665 | 142755 | 142845 | 142935 | 143025 | 143115 | 143205 | 143295 | 143385 | 143475 | 143565 | 143655 | 143745 | 143835 | 143925 | 144015 | 144105 | 144195 | 144285 | 144375 | 144465 | 144555 | 144645 | 144735 | 144825 | 144915 | 145005 | 145095 | 145185 | 145275 | 145365 | 145455 | 145545 | 145635 | 145725 | 145815 | 145905 | 145995 | 146085 | 146175 | 146265 | 146355 | 146445 | 146535 | 146625 | 146715 | 146805 | 146895 | 146985 | 147075 | 147165 | 147255 | 147345 | 147435 | 147525 | 147615 | 147705 | 147795 | 147885 | 147975 | 148065 | 148155 | 148245 | 148335 | 148425 | 148515 | 148605 | 148695 | 148785 | 148875 | 148965 | 149055 | 149145 | 149235 | 149325 | 149415 | 149505 | 149595 | 149685 | 149775 | 149865 | 149955 | 150045 | 150135 | 150225 | 150315 | 150405 | 150495 | 150585 | 150675 | 150765 | 150855 | 150945 | 151035 | 151125 | 151215 | 151305 | 151395 | 151485 | 151575 | 151665 | 151755 | 151845 | 151935 | 152025 | 152115 | 152205 | 152295 | 152385 | 152475 | 152565 | 152655 | 152745 | 152835 | 152925 | 153015 | 153105 | 153195 | 153285 | 153375 | 153465 | 153555 | 153645 | 153735 | 153825 | 153915 | 154005 | 154095 | 154185 | 154275 | 154365 | 154455 | 154545 | 154635 | 154725 | 154815 | 154905 | 154995 | 155085 | 155175 | 155265 | 155355 | 155445 | 155535 | 155625 | 155715 | 155805 | 155895 | 155985 | 156075 | 156165 | 156255 | 156345 | 156435 | 156525 | 156615 | 156705 | 156795 | 156885 | 156975 | 157065 | 157155 | 157245 | 157335 | 157425 | 157515 | 157605 | 157695 | 157785 | 157875 | 157965 | 158055 | 158145 | 158235 | 158325 | 158415 | 158505 | 158595 | 158685 | 158775 | 158865 | 158955 | 159045 | 159135 | 159225 | 159315 | 159405 | 159495 | 159585 | 159675 | 159765 | 159855 | 159945 | 160035 | 160125 | 160215 | 160305 | 160395 | 160485 | 160575 | 160665 | 160755 | 160845 | 160935 | 161025 | 161115 | 161205 | 161295 | 161385 | 161475 | 161565 | 161655 | 161745 | 161835 | 161925 | 162015 | 162105 | 162195 | 162285 | 162375 | 162465 | 162555 | 162645 | 162735 | 162825 | 162915 | 163005 | 163095 | 163185 | 163275 | 163365 | 163455 | 163545 | 163635 | 163725 | 163815 | 163905 | 163995 | 164085 | 164175 | 164265 | 164355 | 164445 | 164535 | 164625 | 164715 | 164805 | 164895 | 164985 | 165075 | 165165 | 165255 | 165345 | 165435 | 165525 | 165615 | 165705 | 165795 | 165885 | 165975 | 166065 | 166155 | 166245 | 166335 | 166425 | 166515 | 166605 | 166695 | 166785 | 166875 | 166965 | 167055 | 167145 | 167235 | 167325 | 167415 | 167505 | 167595 | 167685 | 167775 | 167865 | 167955 | 168045 | 168135 | 168225 | 168315 | 168405 | 168495 | 168585 | 168675 | 168765 | 168855 | 168945 | 169035 | 169125 | 169215 | 169305 | 169395 | 169485 | 169575 | 169665 | 169755 | 169845 | 169935 | 170025 | 170115 | 170205 | 170295 | 170385 | 170475 | 170565 | 170655 | 170745 | 170835 | 170925 | 171015 | 171105 | 171195 | 171285 | 171375 | 171465 | 171555 | 171645 | 171735 | 171825 | 171915 | 172005 | 172095 | 172185 | 172275 | 172365 | 172455 | 172545 | 172635 | 172725 | 172815 | 172905 | 172995 | 173085 | 173175 | 173265 | 173355 | 173445 | 173535 | 173625 | 173715 | 173805 | 173895 | 173985 | 174075 | 174165 | 174255 | 174345 | 174435 | 174525 | 174615 | 174705 | 174795 | 174885 | 174975 | 175065 | 175155 | 175245 | 175335 | 175425 | 175515 | 175605 | 175695 | 175785 | 175875 | 175965 | 176055 | 176145 | 176235 | 176325 | 176415 | 176505 | 176595 | 176685 | 176775 | 176865 | 176955 | 177045 | 177135 | 177225 | 177315 | 177405 | 177495 | 177585 | 177675 | 177765 | 177855 | 177945 | 178035 | 178125 | 178215 | 178305 | 178395 | 178485 | 178575 | 178665 | 178755 | 178845 | 178935 | 179025 | 179115 | 179205 | 179295 | 179385 | 179475 | 179565 | 179655 | 179745 | 179835 | 179925 | 180015 | 180105 | 180195 | 180285 | 180375 | 180465 | 180555 | 180645 | 180735 | 180825 | 180915 | 181005 | 181095 | 181185 | 181275 | 181365 | 181455 | 181545 | 181635 | 181725 | 181815 | 181905 | 181995 | 182085 | 182175 | 182265 | 182355 | 182445 | 182535 | 182625 | 182715 | 182805 | 182895 | 182985 | 183075 | 183165 | 183255 | 183345 | 183435 | 183525 | 183615 | 183705 | 183795 | 183885 | 183975 | 184065 | 184155 | 184245 | 184335 | 184425 | 184515 | 184605 | 184695 | 184785 | 184875 | 184965 | 185055 | 185145 | 185235 | 185325 | 185415 | 185505 | 185595 | 185685 | 185775 | 185865 | 185955 | 186045 | 186135 | 186225 | 186315 | 186405 | 186495 | 186585 | 186675 | 186765 | 186855 | 186945 | 187035 | 187125 | 187215 | 187305 | 187395 | 187485 | 187575 | 187665 | 187755 | 187845 | 187935 | 188025 | 188115 | 188205 | 188295 | 188385 | 188475 | 188565 | 188655 | 188745 | 188835 | 188925 | 189015 | 189105 | 189195 | 189285 | 189375 | 189465 | 189555 | 189645 | 189735 | 189825 | 189915 | 190005 | 190095 | 190185 | 190275 | 190365 | 190455 | 190545 | 190635 | 190725 | 190815 | 190905 | 190995 | 191085 | 191175 | 191265 | 191355 | 191445 | 191535 | 191625 | 191715 | 191805 | 191895 | 191985 | 192075 | 192165 | 192255 | 192345 | 192435 | 192525 | 192615 | 192705 | 192795 | 192885 | 192975 | 193065 | 193155 | 193245 | 193335 | 193425 | 193515 | 193605 | 193695 | 193785 | 193875 | 193965 | 194055 | 194145 | 194235 | 194325 | 194415 | 194505 | 194595 | 194685 | 194775 | 194865 | 194955 | 195045 | 195135 | 195225 | 195315 | 195405 | 195495 | 195585 | 195675 | 195765 | 195855 | 195945 | 196035 | 196125 | 196215 | 196305 | 196395 | 196485 | 196575 | 196665 | 196755 | 196845 | 196935 | 197025 | 197115 | 197205 | 197295 | 197385 | 197475 | 197565 | 197655 | 197745 | 197835 | 197925 | 198015 | 198105 | 198195 | 198285 | 198375 | 198465 | 198555 | 198645 | 198735 | 198825 | 198915 | 199005 | 199095 | 199185 | 199275 |  |
|--------|--------|--------|--------|--------|--------|--------|--------|--------|--------|--------|--------|--------|--------|--------|--------|--------|--------|--------|--------|--------|--------|--------|--------|--------|--------|--------|--------|--------|--------|--------|--------|--------|--------|--------|--------|--------|--------|--------|--------|--------|--------|--------|--------|--------|--------|--------|--------|--------|--------|--------|--------|--------|--------|--------|--------|--------|--------|--------|--------|--------|--------|--------|--------|--------|--------|--------|--------|--------|--------|--------|--------|--------|--------|--------|--------|--------|--------|--------|--------|--------|--------|--------|--------|--------|--------|--------|--------|--------|--------|--------|--------|--------|--------|--------|--------|--------|--------|--------|--------|--------|--------|--------|--------|--------|--------|--------|--------|--------|--------|--------|--------|--------|--------|--------|--------|--------|--------|--------|--------|--------|--------|--------|--------|--------|--------|--------|--------|--------|--------|--------|--------|--------|--------|--------|--------|--------|--------|--------|--------|--------|--------|--------|--------|--------|--------|--------|--------|--------|--------|--------|--------|--------|--------|--------|--------|--------|--------|--------|--------|--------|--------|--------|--------|--------|--------|--------|--------|--------|--------|--------|--------|--------|--------|--------|--------|--------|--------|--------|--------|--------|--------|--------|--------|--------|--------|--------|--------|--------|--------|--------|--------|--------|--------|--------|--------|--------|--------|--------|--------|--------|--------|--------|--------|--------|--------|--------|--------|--------|--------|--------|--------|--------|--------|--------|--------|--------|--------|--------|--------|--------|--------|--------|--------|--------|--------|--------|--------|--------|--------|--------|--------|--------|--------|--------|--------|--------|--------|--------|--------|--------|--------|--------|--------|--------|--------|--------|--------|--------|--------|--------|--------|--------|--------|--------|--------|--------|--------|--------|--------|--------|--------|--------|--------|--------|--------|--------|--------|--------|--------|--------|--------|--------|--------|--------|--------|--------|--------|--------|--------|--------|--------|--------|--------|--------|--------|--------|--------|--------|--------|--------|--------|--------|--------|--------|--------|--------|--------|--------|--------|--------|--------|--------|--------|--------|--------|--------|--------|--------|--------|--------|--------|--------|--------|--------|--------|--------|--------|--------|--------|--------|--------|--------|--------|--------|--------|--------|--------|--------|--------|--------|--------|--------|--------|--------|--------|--------|--------|--------|--------|--------|--------|--------|--------|--------|--------|--------|--------|--------|--------|--------|--------|--------|--------|--------|--------|--------|--------|--------|--------|--------|--------|--------|--------|--------|--------|--------|--------|--------|--------|--------|--------|--------|--------|--------|--------|--------|--------|--------|--------|--------|--------|--------|--------|--------|--------|--------|--------|--------|--------|--------|--------|--------|--------|--------|--------|--------|--------|--------|--------|--------|--------|--------|--------|--------|--------|--------|--------|--------|--------|--------|--------|--------|--------|--------|--------|--------|--------|--------|--------|--------|--------|--------|--------|--------|--------|--------|--------|--------|--------|--------|--------|--------|--------|--------|--------|--------|--------|--------|--------|--------|--------|--------|--------|--------|--------|--------|--------|--------|--------|--------|--------|--------|--------|--------|--------|--------|--------|--------|--------|--------|--------|--------|--------|--------|--------|--------|--------|--------|--------|--------|--------|--------|--------|--------|--------|--------|--------|--------|--------|--------|--------|--------|--------|--------|--------|--------|--------|--------|--------|--------|--------|--------|--------|--------|--------|--------|--------|--------|--------|--------|--------|--------|--------|--------|--------|--------|--------|--------|--------|--------|--------|--------|--------|--------|--------|--------|--------|--------|--------|--------|--------|--------|--------|--------|--------|--------|--------|--------|--------|--------|--------|--------|--------|--------|--------|--------|--------|--------|--------|--------|--------|--------|--------|--------|--------|--------|--------|--------|--------|--------|--------|--------|--------|--------|--------|--------|--------|--------|--------|--------|--------|--------|--------|--------|--------|--------|--------|--------|--------|--------|--------|--------|--------|--------|--------|--------|--------|--------|--------|--------|--------|--------|--------|--------|--------|--------|--------|--------|--------|--------|--------|--------|--------|--------|--------|--------|--------|--------|--------|--------|--------|--------|--------|--------|--------|--------|--------|--------|--------|--------|--------|--------|--------|--------|--------|--------|--------|--------|--------|--------|--------|--------|--------|--------|--------|--------|--------|--------|--------|--------|--------|--------|--------|--------|--------|--------|--------|--------|--------|--------|--------|--------|--------|--------|--------|--------|--------|--------|--------|--------|--------|--------|--------|--------|--------|--------|--------|--------|--------|--------|--------|--------|--------|--------|--------|--------|--------|--------|--------|--------|--------|--------|--------|--------|--------|--------|--------|--------|--------|--------|--------|--------|--------|--------|--------|--------|--------|--------|--------|--------|--------|--------|--------|--------|--------|--------|--------|--------|--------|--------|--------|--------|--------|--------|--------|--------|--------|--------|--------|--------|--------|--------|--------|--------|--------|--------|--------|--------|--------|--------|--------|--------|--------|--------|--------|--------|--------|--------|--------|--------|--------|--------|--------|--------|--------|--------|--------|--------|--------|--------|--------|--------|--------|--------|--------|--------|--------|--------|--------|--------|--------|--------|--------|--------|--------|--------|--------|--------|--------|--------|--------|--------|--------|--------|--------|--------|--------|--------|--------|--------|--------|--------|--------|--------|--------|--------|--------|--------|--------|--------|--------|--------|--------|--------|--------|--------|--------|--------|--------|--------|--------|--------|--------|--------|--------|--------|--------|--------|--------|--------|--------|--------|--------|--------|--------|--------|--------|--------|--------|--------|--------|--------|--------|--------|--------|--------|--------|--------|--------|--------|--------|--------|--------|--------|--------|--------|--------|--------|--------|--------|--------|--------|--------|--------|--------|--------|--------|--------|--------|--------|--------|--------|--------|--------|--------|--------|--------|--------|--------|--------|--------|--------|--------|--------|--------|--------|--------|--------|--------|--------|--------|--------|--------|--------|--------|--------|--------|--------|--------|--------|--------|--------|--------|--------|--------|--------|--------|--------|--------|--------|--------|--------|--------|--------|--------|--------|--------|--------|--------|--------|--------|--------|--------|--------|--------|--------|--------|--------|--------|--------|--------|--------|--------|--------|--------|--------|--------|--------|--------|--------|--------|--------|--------|--------|--------|--------|--------|--------|--------|--------|--------|--------|--------|--------|--------|--------|--------|--------|--------|--------|--------|--------|--------|--------|--------|--------|--------|--------|--------|--------|--------|--------|--------|--------|--------|--------|--------|--------|--------|--------|--------|--------|--------|--------|--------|--------|--------|--------|--------|--------|--------|--------|--------|--------|--------|--------|--------|--------|--------|--------|--------|--------|--------|--------|--------|--------|--------|--------|--------|--------|--------|--------|--------|--------|--------|--------|--------|--------|--------|--------|--------|--------|--------|--------|--------|--------|--------|--------|--------|--------|--------|--------|--------|--------|--------|--------|--------|--------|--------|--------|--------|--------|--------|--------|--------|--------|--------|--------|--------|--------|--------|--------|--------|--------|--------|--------|--------|--------|--------|--------|--------|--------|--------|--------|--------|--------|--------|--------|--------|--------|--------|--------|--------|--------|--------|--------|--------|--------|--------|--------|--------|--------|--------|--------|--------|--------|--------|--------|--------|--------|--------|--------|--------|--------|--------|--------|--------|--------|--------|--------|--------|--------|--------|--------|--------|--------|--------|--------|--------|--------|--------|--------|--------|--------|--------|--------|--------|--------|--------|--------|--------|--------|--------|--------|--------|--------|--------|--------|--------|--------|--------|--------|--------|--------|--------|--------|--------|--------|--------|--------|--------|--------|--------|--------|--------|--------|--------|--------|--------|--------|--------|--|

|         |        |      |         |        |      |         |        |      |         |        |      |         |        |       |         |        |         |         |        |       |       |
|---------|--------|------|---------|--------|------|---------|--------|------|---------|--------|------|---------|--------|-------|---------|--------|---------|---------|--------|-------|-------|
| 99514   | 0.152  | 2798 | 1438649 | 0.006  | 4372 | 99614   | 0.006  | 3620 | 1438649 | 0.051  | 4320 | 1592    | 3957   | FALSE | 4526    | 14301  | 1592    | 3957    | FALSE  |       |       |
| 1030221 | -0.218 | 2491 | 1433161 | 0.001  | 7439 | 1031014 | 0.138  | 1526 | 1433161 | -0.092 | 4642 | 2278    | 9881   | FALSE | 5646    | 4642   | 2278    | 9881    | FALSE  |       |       |
| 1030222 | -0.174 | 3649 | 1438431 | 0.103  | 4243 | 1031015 | 0.138  | 1526 | 1438431 | -0.092 | 4642 | 2278    | 9881   | FALSE | 5646    | 4642   | 2278    | 9881    | FALSE  |       |       |
| 99288   | 0.071  | 4625 | 1429268 | 0.097  | 3726 | 99288   | 0.097  | 3726 | 1429268 | 0.246  | 4825 | 2141    | 722    | FALSE | 5802    | 4825   | 2141    | 722     | FALSE  |       |       |
| 99860   | 0.112  | 5625 | 1448876 | 0.009  | 8226 | 99860   | 0.009  | 8226 | 1448876 | 0.094  | 4307 | 375     | 2677   | TRUE  | 3811    | 4307   | 375     | 2677    | TRUE   |       |       |
| 104235  | -0.209 | 572  | 1433332 | 0.001  | 5702 | 104235  | 0.001  | 5702 | 1433332 | -0.146 | 7988 | 143833  | 0.001  | 2888  | 4820    | 625    | 3264    | 9694    | FALSE  |       |       |
| 104236  | -0.118 | 3842 | 1424176 | 0.091  | 2800 | 104236  | 0.091  | 2800 | 1424176 | -0.117 | 7266 | 1424176 | 0.091  | 2888  | 4820    | 625    | 3264    | 9694    | FALSE  |       |       |
| 104237  | -0.257 | 3564 | 1420168 | 0.020  | 7455 | 104237  | 0.020  | 7455 | 1420168 | -0.144 | 1646 | 1420168 | 0.020  | 4445  | 4310    | 125    | 2258    | 9439    | TRUE   |       |       |
| 96899   | 0.127  | 1397 | 1423771 | -0.048 | 6696 | 96899   | 0.127  | 1397 | 1423771 | -0.048 | 6696 | 5669    | 941    | FALSE | 4110    | 5038   | 1423771 | 0.119   | 1192   | FALSE |       |
| 105000  | 0.132  | 3239 | 1416701 | 0.141  | 2437 | 105000  | 0.132  | 3239 | 1416701 | 0.141  | 2437 | 1416701 | 0.132  | 3239  | 4310    | 375    | 2217    | 1426    | TRUE   |       |       |
| 96420   | -0.175 | 5242 | 1419273 | 0.084  | 5242 | 96420   | 0.175  | 5242 | 1419273 | 0.084  | 5242 | 1419273 | 0.175  | 5242  | 1419273 | 0.084  | 5242    | 1419273 | 0.175  | 5242  | FALSE |
| 99472   | 0.049  | 5444 | 1418266 | 0.081  | 4815 | 99472   | 0.049  | 5444 | 1418266 | 0.081  | 4815 | 1418266 | 0.049  | 5444  | 1418266 | 0.081  | 4815    | 1418266 | 0.049  | 5444  | FALSE |
| 102257  | 0.077  | 4314 | 1421233 | -0.101 | 3368 | 102257  | 0.077  | 4314 | 1421233 | -0.101 | 3368 | 1421233 | 0.077  | 4314  | 1421233 | 0.101  | 3368    | 1421233 | 0.077  | 4314  | FALSE |
| 99298   | 0.007  | 3091 | 1433581 | 0.107  | 4314 | 99298   | 0.007  | 3091 | 1433581 | 0.107  | 4314 | 1433581 | 0.007  | 3091  | 1433581 | 0.107  | 4314    | 1433581 | 0.007  | 3091  | FALSE |
| 99817   | 0.150  | 1571 | 1445535 | 0.045  | 6318 | 99817   | 0.150  | 1571 | 1445535 | 0.045  | 6318 | 99817   | 0.150  | 1571  | 1445535 | 0.045  | 6318    | 99817   | 0.150  | 1571  | FALSE |
| 99822   | -0.196 | 3220 | 1422720 | -0.126 | 4633 | 99822   | -0.196 | 3220 | 1422720 | -0.126 | 4633 | 99822   | -0.196 | 3220  | 1422720 | -0.126 | 4633    | 99822   | -0.196 | 3220  | FALSE |
| 101123  | 0.135  | 2158 | 1446427 | 0.166  | 1686 | 101123  | 0.135  | 2158 | 1446427 | 0.166  | 1686 | 101123  | 0.135  | 2158  | 1446427 | 0.166  | 1686    | 101123  | 0.135  | 2158  | FALSE |
| 101124  | 0.261  | 268  | 1449476 | 0.018  | 7812 | 101124  | 0.261  | 268  | 1449476 | 0.018  | 7812 | 101124  | 0.261  | 268   | 1449476 | 0.018  | 7812    | 101124  | 0.261  | 268   | FALSE |
| 95546   | 0.111  | 3046 | 1434589 | -0.108 | 3961 | 95546   | 0.111  | 3046 | 1434589 | -0.108 | 3961 | 1434589 | 0.111  | 3046  | 1434589 | 0.108  | 3961    | 1434589 | 0.111  | 3046  | FALSE |
| 95547   | 0.132  | 1702 | 1446200 | 0.145  | 1918 | 95547   | 0.132  | 1702 | 1446200 | 0.145  | 1918 | 1446200 | 0.132  | 1702  | 1446200 | 0.145  | 1918    | 1446200 | 0.132  | 1702  | FALSE |
| 103026  | 0.007  | 9970 | 1449095 | -0.025 | 7426 | 103026  | 0.007  | 9970 | 1449095 | -0.025 | 7426 | 103026  | 0.007  | 9970  | 1449095 | -0.025 | 7426    | 103026  | 0.007  | 9970  | FALSE |
| 99360   | -0.072 | 1865 | 1440566 | 0.039  | 6622 | 99360   | -0.072 | 1865 | 1440566 | 0.039  | 6622 | 99360   | -0.072 | 1865  | 1440566 | 0.039  | 6622    | 99360   | -0.072 | 1865  | FALSE |
| 99572   | 0.007  | 2624 | 1431822 | 0.102  | 5965 | 99572   | 0.007  | 2624 | 1431822 | 0.102  | 5965 | 99572   | 0.007  | 2624  | 1431822 | 0.102  | 5965    | 99572   | 0.007  | 2624  | FALSE |
| 102223  | 0.175  | 1099 | 1416897 | -0.093 | 5116 | 102223  | 0.175  | 1099 | 1416897 | -0.093 | 5116 | 102223  | 0.175  | 1099  | 1416897 | -0.093 | 5116    | 102223  | 0.175  | 1099  | FALSE |
| 15158   | 0.131  | 3297 | 1419395 | 0.006  | 5489 | 15158   | 0.131  | 3297 | 1419395 | 0.006  | 5489 | 15158   | 0.131  | 3297  | 1419395 | 0.006  | 5489    | 15158   | 0.131  | 3297  | FALSE |
| 148085  | 0.143  | 2430 | 1416104 | 0.129  | 1929 | 148085  | 0.143  | 2430 | 1416104 | 0.129  | 1929 | 148085  | 0.143  | 2430  | 1416104 | 0.129  | 1929    | 148085  | 0.143  | 2430  | FALSE |
| 100016  | 0.000  | 8524 | 1450842 | 0.028  | 646  | 100016  | 0.000  | 8524 | 1450842 | 0.028  | 646  | 100016  | 0.000  | 8524  | 1450842 | 0.028  | 646     | 100016  | 0.000  | 8524  | FALSE |
| 98840   | 0.143  | 3046 | 1422084 | 0.025  | 7446 | 98840   | 0.143  | 3046 | 1422084 | 0.025  | 7446 | 98840   | 0.143  | 3046  | 1422084 | 0.025  | 7446    | 98840   | 0.143  | 3046  | FALSE |
| 101038  | -0.024 | 7302 | 1446200 | -0.083 | 4172 | 101038  | -0.024 | 7302 | 1446200 | -0.083 | 4172 | 101038  | -0.024 | 7302  | 1446200 | -0.083 | 4172    | 101038  | -0.024 | 7302  | FALSE |
| 101039  | 0.187  | 1702 | 1442320 | 0.033  | 7048 | 101039  | 0.187  | 1702 | 1442320 | 0.033  | 7048 | 101039  | 0.187  | 1702  | 1442320 | 0.033  | 7048    | 101039  | 0.187  | 1702  | FALSE |
| 101040  | 0.000  | 8601 | 1428312 | 0.116  | 2188 | 101040  | 0.000  | 8601 | 1428312 | 0.116  | 2188 | 101040  | 0.000  | 8601  | 1428312 | 0.116  | 2188    | 101040  | 0.000  | 8601  | FALSE |
| 96702   | 0.030  | 1048 | 1451906 | 0.000  | 5845 | 96702   | 0.030  | 1048 | 1451906 | 0.000  | 5845 | 96702   | 0.030  | 1048  | 1451906 | 0.000  | 5845    | 96702   | 0.030  | 1048  | FALSE |
| 104092  | 0.125  | 1502 | 1426298 | 0.026  | 1502 | 104092  | 0.125  | 1502 | 1426298 | 0.026  | 1502 | 104092  | 0.125  | 1502  | 1426298 | 0.026  | 1502    | 104092  | 0.125  | 1502  | FALSE |
| 104093  | 0.024  | 3604 | 1449090 | 0.082  | 2915 | 104093  | 0.024  | 3604 | 1449090 | 0.082  | 2915 | 104093  | 0.024  | 3604  | 1449090 | 0.082  | 2915    | 104093  | 0.024  | 3604  | FALSE |
| 151798  | 0.293  | 4172 | 1434320 | 0.039  | 6716 | 151798  | 0.293  | 4172 | 1434320 | 0.039  | 6716 | 151798  | 0.293  | 4172  | 1434320 | 0.039  | 6716    | 151798  | 0.293  | 4172  | FALSE |
| 100014  | 0.130  | 3077 | 1422463 | -0.100 | 4680 | 100014  | 0.130  | 3077 | 1422463 | -0.100 | 4680 | 100014  | 0.130  | 3077  | 1422463 | -0.100 | 4680    | 100014  | 0.130  | 3077  | FALSE |
| 100015  | 0.162  | 1544 | 1402090 | 0.025  | 1644 | 100015  | 0.162  | 1544 | 1402090 | 0.025  | 1644 | 100015  | 0.162  | 1544  | 1402090 | 0.025  | 1644    | 100015  | 0.162  | 1544  | FALSE |
| 96408   | -0.026 | 7350 | 1423236 | 0.445  | 6229 | 96408   | -0.026 | 7350 | 1423236 | 0.445  | 6229 | 96408   | -0.026 | 7350  | 1423236 | 0.445  | 6229    | 96408   | -0.026 | 7350  | FALSE |
| 96409   | 0.109  | 2703 | 1449109 | 0.033  | 7137 | 96409   | 0.109  | 2703 | 1449109 | 0.033  | 7137 | 96409   | 0.109  | 2703  | 1449109 | 0.033  | 7137    | 96409   | 0.109  | 2703  | FALSE |
| 102768  | -0.567 | 1864 | 1451457 | -0.200 | 4184 | 102768  | -0.567 | 1864 | 1451457 | -0.200 | 4184 | 102768  | -0.567 | 1864  | 1451457 | -0.200 | 4184    | 102768  | -0.567 | 1864  | FALSE |
| 102769  | -0.188 | 3051 | 1452626 | -0.079 | 4840 | 102769  | -0.188 | 3051 | 1452626 | -0.079 | 4840 | 102769  | -0.188 | 3051  | 1452626 | -0.079 | 4840    | 102769  | -0.188 | 3051  | FALSE |
| 102770  | -0.172 | 3198 | 1428256 | 0.134  | 5225 | 102770  | -0.172 | 3198 | 1428256 | 0.134  | 5225 | 102770  | -0.172 | 3198  | 1428256 | 0.134  | 5225    | 102770  | -0.172 | 3198  | FALSE |
| 102771  | 0.093  | 3186 | 1424874 | -0.054 | 6230 | 102771  | 0.093  | 3186 | 1424874 | -0.054 | 6230 | 102771  | 0.093  | 3186  | 1424874 | -0.054 | 6230    | 102771  | 0.093  | 3186  | FALSE |
| 102772  | 0.109  | 1824 | 1438582 | 0.088  | 4681 | 102772  | 0.109  | 1824 | 1438582 | 0.088  | 4681 | 102772  | 0.109  | 1824  | 1438582 | 0.088  | 4681    | 102772  | 0.109  | 1824  | FALSE |
| 102773  | 0.175  | 1821 | 1421038 | 0.040  | 6800 | 102773  | 0.175  | 1821 | 1421038 | 0.040  | 6800 | 102773  | 0.175  | 1821  | 1421038 | 0.040  | 6800    | 102773  | 0.175  | 1821  | FALSE |
| 104086  | 0.188  | 2433 | 1424000 | 0.244  | 218  | 104086  | 0.188  | 2433 | 1424000 | 0.244  | 218  | 104086  | 0.188  | 2433  | 1424000 | 0.244  | 218     | 104086  | 0.188  | 2433  | FALSE |
| 96889   | 0.137  | 2433 | 1424882 | 0.046  | 5176 | 96889   | 0.137  | 2433 | 1424882 | 0.046  | 5176 | 96889   | 0.137  | 2433  | 1424882 | 0.046  | 5176    | 96889   | 0.137  | 2433  | FALSE |
| 96890   | 0.046  | 5898 | 1449424 | 0.021  | 7621 | 96890   | 0.046  | 5898 | 1449424 | 0.021  | 7621 | 96890   | 0.046  | 5898  | 1449424 | 0.021  | 7621    | 96890   | 0.046  | 5898  | FALSE |
| 102020  | -0.046 | 5271 | 1415709 | -0.048 | 5632 | 102020  | -0.046 | 5271 | 1415709 | -0.048 | 5632 | 102020  | -0.046 | 5271  | 1415709 | -0.048 | 5632    | 102020  | -0.046 | 5271  | FALSE |
| 96832   | 0.156  | 2480 | 1440266 | 0.096  | 3113 | 96832   | 0.156  | 2480 | 1440266 | 0.096  | 3113 | 96832   | 0.156  | 2480  | 1440266 | 0.096  | 3113    | 96832   | 0.156  | 2480  | FALSE |
| 94909   | 0.208  | 4428 | 1449058 | -0.072 | 4825 | 94909   | 0.208  | 4428 | 1449058 | -0.072 | 4825 | 94909   | 0.208  | 4428  | 1449058 | -0.072 | 4825    | 94909   | 0.208  | 4428  | FALSE |
| 97326   | 0.046  | 7708 | 1451019 | -0.109 | 2841 | 97326   | 0.046  | 7708 | 1451019 | -0.109 | 2841 | 97326   | 0.046  | 7708  | 1451019 | -0.109 | 2841    | 97326   | 0.046  | 7708  | FALSE |
| 102021  | -0.086 | 4828 | 1427095 | -0.200 | 3099 | 102021  | -0.086 | 4828 | 1427095 | -0.200 | 3099 | 102021  | -0.086 | 4828  | 1427095 | -0.200 | 3099    | 102021  | -0.086 | 4828  | FALSE |
| 102022  | -0.049 | 4137 | 1422484 | 0.007  | 4137 | 102022  | -0.049 | 4137 | 1422484 | 0.007  | 4137 | 102022  | -0.049 | 4137  | 1422484 | 0.007  | 4137    | 102022  | -0.049 | 4137  | FALSE |
| 102023  | -0.122 | 4137 | 1422484 | -0.122 | 4137 | 102023  | -0.122 | 4137 | 1422484 | -0.122 | 4137 | 102023  | -0.122 | 4137  | 1422484 | -0.122 | 4137    | 102023  | -0.122 | 4137  | FALSE |
| 102024  | -0.049 | 4137 | 1422484 | -0.049 | 4137 | 102024  | -0.049 | 4137 | 1422484 | -0.049 | 4137 | 102024  | -0.049 | 4137  | 1422484 | -0.049 | 4137    | 102024  | -0.049 | 4137  | FALSE |
| 102025  | -0.049 | 4137 | 1422484 | -0.049 | 4137 | 102025  | -0.049 | 4137 | 1422484 | -0.049 | 4137 | 102025  | -0.049 | 41    |         |        |         |         |        |       |       |

|        |        |        |         |        |        |         |        |        |          |        |        |        |        |        |        |       |                                  |
|--------|--------|--------|---------|--------|--------|---------|--------|--------|----------|--------|--------|--------|--------|--------|--------|-------|----------------------------------|
| 101436 | -0.386 | 2351   | 1418652 | 0.071  | 3932   | 1001436 | 0.044  | 4597   | 14245097 | 0.177  | 2949   | 4892   | 25     | 2175   | 2654   | FALSE | Genotoxin (C-X-C motif) domain 9 |
| 944478 | -0.074 | 6434   | 1425092 | 0.103  | 3686   | 944478  | -0.164 | 4597   | 14245097 | 0.177  | 2949   | 4892   | 25     | 2175   | 2654   | FALSE | Genotoxin (C-X-C motif) domain 9 |
| 101437 | -0.074 | 6434   | 1425092 | 0.103  | 3686   | 101437  | -0.164 | 4597   | 14245097 | 0.177  | 2949   | 4892   | 25     | 2175   | 2654   | FALSE | Genotoxin (C-X-C motif) domain 9 |
| 95006  | -0.160 | 2271   | 1406467 | 0.085  | 95006  | 95006   | -0.160 | 2271   | 1406467  | 0.085  | 95006  | 95006  | 95006  | 95006  | 95006  | FALSE | Genotoxin (C-X-C motif) domain 9 |
| 95007  | -0.071 | 5696   | 1422752 | 0.119  | 5696   | 95007   | -0.071 | 5696   | 1422752  | 0.119  | 5696   | 95007  | 95007  | 95007  | 95007  | FALSE | Genotoxin (C-X-C motif) domain 9 |
| 101976 | 0.044  | 4623   | 1417176 | 0.087  | 101976 | 101976  | 0.044  | 4623   | 1417176  | 0.087  | 101976 | 101976 | 101976 | 101976 | 101976 | FALSE | Genotoxin (C-X-C motif) domain 9 |
| 902471 | -0.212 | 902471 | 902471  | 0.212  | 902471 | 902471  | -0.212 | 902471 | 902471   | 0.212  | 902471 | 902471 | 902471 | 902471 | 902471 | FALSE | Genotoxin (C-X-C motif) domain 9 |
| 103327 | -0.017 | 7448   | 1434474 | 0.099  | 7448   | 103327  | -0.017 | 7448   | 1434474  | 0.099  | 7448   | 103327 | 103327 | 103327 | 103327 | FALSE | Genotoxin (C-X-C motif) domain 9 |
| 90472  | 0.195  | 951    | 1418311 | 0.205  | 90472  | 90472   | 0.195  | 951    | 1418311  | 0.205  | 90472  | 90472  | 90472  | 90472  | 90472  | FALSE | Genotoxin (C-X-C motif) domain 9 |
| 9446   | -0.052 | 5722   | 1431812 | 0.134  | 9446   | 9446    | -0.052 | 5722   | 1431812  | 0.134  | 9446   | 9446   | 9446   | 9446   | 9446   | FALSE | Genotoxin (C-X-C motif) domain 9 |
| 102567 | 0.133  | 4517   | 1422259 | 0.099  | 102567 | 102567  | 0.133  | 4517   | 1422259  | 0.099  | 102567 | 102567 | 102567 | 102567 | 102567 | FALSE | Genotoxin (C-X-C motif) domain 9 |
| 97466  | -0.034 | 4684   | 1416789 | 0.110  | 97466  | 97466   | -0.034 | 4684   | 1416789  | 0.110  | 97466  | 97466  | 97466  | 97466  | 97466  | FALSE | Genotoxin (C-X-C motif) domain 9 |
| 101525 | 0.034  | 5811   | 1415790 | 0.084  | 101525 | 101525  | 0.034  | 5811   | 1415790  | 0.084  | 101525 | 101525 | 101525 | 101525 | 101525 | FALSE | Genotoxin (C-X-C motif) domain 9 |
| 103047 | -0.061 | 5971   | 1434445 | 0.083  | 103047 | 103047  | -0.061 | 5971   | 1434445  | 0.083  | 103047 | 103047 | 103047 | 103047 | 103047 | FALSE | Genotoxin (C-X-C motif) domain 9 |
| 103058 | 0.009  | 4638   | 1422456 | 0.028  | 103058 | 103058  | 0.009  | 4638   | 1422456  | 0.028  | 103058 | 103058 | 103058 | 103058 | 103058 | FALSE | Genotoxin (C-X-C motif) domain 9 |
| 99060  | -0.092 | 6118   | 1450138 | 0.099  | 99060  | 99060   | -0.092 | 6118   | 1450138  | 0.099  | 99060  | 99060  | 99060  | 99060  | 99060  | FALSE | Genotoxin (C-X-C motif) domain 9 |
| 99151  | 0.212  | 493    | 1417377 | 0.442  | 99151  | 99151   | 0.212  | 493    | 1417377  | 0.442  | 99151  | 99151  | 99151  | 99151  | 99151  | FALSE | Genotoxin (C-X-C motif) domain 9 |
| 99895  | 0.074  | 5221   | 1449874 | 0.089  | 99895  | 99895   | 0.074  | 5221   | 1449874  | 0.089  | 99895  | 99895  | 99895  | 99895  | 99895  | FALSE | Genotoxin (C-X-C motif) domain 9 |
| 146844 | 0.143  | 2426   | 1450456 | 0.213  | 146844 | 146844  | 0.143  | 2426   | 1450456  | 0.213  | 146844 | 146844 | 146844 | 146844 | 146844 | FALSE | Genotoxin (C-X-C motif) domain 9 |
| 94920  | 0.053  | 5619   | 1415793 | 0.081  | 94920  | 94920   | 0.053  | 5619   | 1415793  | 0.081  | 94920  | 94920  | 94920  | 94920  | 94920  | FALSE | Genotoxin (C-X-C motif) domain 9 |
| 9708   | -0.136 | 4852   | 1426884 | 0.234  | 9708   | 9708    | -0.136 | 4852   | 1426884  | 0.234  | 9708   | 9708   | 9708   | 9708   | 9708   | FALSE | Genotoxin (C-X-C motif) domain 9 |
| 100106 | 0.026  | 5495   | 1451381 | 0.094  | 100106 | 100106  | 0.026  | 5495   | 1451381  | 0.094  | 100106 | 100106 | 100106 | 100106 | 100106 | FALSE | Genotoxin (C-X-C motif) domain 9 |
| 96725  | 0.079  | 4422   | 1448539 | 0.063  | 96725  | 96725   | 0.079  | 4422   | 1448539  | 0.063  | 96725  | 96725  | 96725  | 96725  | 96725  | FALSE | Genotoxin (C-X-C motif) domain 9 |
| 103842 | 0.886  | 219    | 1422439 | 0.054  | 103842 | 103842  | 0.886  | 219    | 1422439  | 0.054  | 103842 | 103842 | 103842 | 103842 | 103842 | FALSE | Genotoxin (C-X-C motif) domain 9 |
| 140849 | -0.249 | 892    | 1417892 | 0.015  | 140849 | 140849  | -0.249 | 892    | 1417892  | 0.015  | 140849 | 140849 | 140849 | 140849 | 140849 | FALSE | Genotoxin (C-X-C motif) domain 9 |
| 145011 | 0.215  | 2745   | 1419387 | 0.086  | 145011 | 145011  | 0.215  | 2745   | 1419387  | 0.086  | 145011 | 145011 | 145011 | 145011 | 145011 | FALSE | Genotoxin (C-X-C motif) domain 9 |
| 101715 | 0.142  | 2774   | 1422715 | 0.026  | 101715 | 101715  | 0.142  | 2774   | 1422715  | 0.026  | 101715 | 101715 | 101715 | 101715 | 101715 | FALSE | Genotoxin (C-X-C motif) domain 9 |
| 101117 | 0.336  | 981    | 1427252 | 0.080  | 101117 | 101117  | 0.336  | 981    | 1427252  | 0.080  | 101117 | 101117 | 101117 | 101117 | 101117 | FALSE | Genotoxin (C-X-C motif) domain 9 |
| 104468 | 0.097  | 3420   | 1452416 | 0.084  | 104468 | 104468  | 0.097  | 3420   | 1452416  | 0.084  | 104468 | 104468 | 104468 | 104468 | 104468 | FALSE | Genotoxin (C-X-C motif) domain 9 |
| 102242 | 0.042  | 6488   | 1421087 | -0.131 | 102242 | 102242  | 0.042  | 6488   | 1421087  | -0.131 | 102242 | 102242 | 102242 | 102242 | 102242 | FALSE | Genotoxin (C-X-C motif) domain 9 |
| 140624 | -0.112 | 3975   | 1415798 | 0.294  | 140624 | 140624  | -0.112 | 3975   | 1415798  | 0.294  | 140624 | 140624 | 140624 | 140624 | 140624 | FALSE | Genotoxin (C-X-C motif) domain 9 |
| 103628 | -0.092 | 5415   | 1428979 | 0.067  | 103628 | 103628  | -0.092 | 5415   | 1428979  | 0.067  | 103628 | 103628 | 103628 | 103628 | 103628 | FALSE | Genotoxin (C-X-C motif) domain 9 |
| 94298  | -0.016 | 2007   | 1414538 | 0.026  | 94298  | 94298   | -0.016 | 2007   | 1414538  | 0.026  | 94298  | 94298  | 94298  | 94298  | 94298  | FALSE | Genotoxin (C-X-C motif) domain 9 |
| 140887 | -0.066 | 7454   | 1448495 | 0.047  | 140887 | 140887  | -0.066 | 7454   | 1448495  | 0.047  | 140887 | 140887 | 140887 | 140887 | 140887 | FALSE | Genotoxin (C-X-C motif) domain 9 |
| 140648 | 0.034  | 5413   | 1423211 | -0.077 | 140648 | 140648  | 0.034  | 5413   | 1423211  | -0.077 | 140648 | 140648 | 140648 | 140648 | 140648 | FALSE | Genotoxin (C-X-C motif) domain 9 |
| 96094  | 0.067  | 4692   | 1438460 | 0.115  | 96094  | 96094   | 0.067  | 4692   | 1438460  | 0.115  | 96094  | 96094  | 96094  | 96094  | 96094  | FALSE | Genotoxin (C-X-C motif) domain 9 |
| 102104 | -0.082 | 5519   | 1450234 | 0.074  | 102104 | 102104  | -0.082 | 5519   | 1450234  | 0.074  | 102104 | 102104 | 102104 | 102104 | 102104 | FALSE | Genotoxin (C-X-C motif) domain 9 |
| 99551  | -0.025 | 7577   | 1418175 | 0.097  | 99551  | 99551   | -0.025 | 7577   | 1418175  | 0.097  | 99551  | 99551  | 99551  | 99551  | 99551  | FALSE | Genotoxin (C-X-C motif) domain 9 |
| 140493 | 0.104  | 2058   | 1440229 | 0.004  | 140493 | 140493  | 0.104  | 2058   | 1440229  | 0.004  | 140493 | 140493 | 140493 | 140493 | 140493 | FALSE | Genotoxin (C-X-C motif) domain 9 |
| 96252  | 0.043  | 6438   | 1435133 | 0.197  | 96252  | 96252   | 0.043  | 6438   | 1435133  | 0.197  | 96252  | 96252  | 96252  | 96252  | 96252  | FALSE | Genotoxin (C-X-C motif) domain 9 |
| 96997  | 0.165  | 1882   | 1420409 | 0.089  | 96997  | 96997   | 0.165  | 1882   | 1420409  | 0.089  | 96997  | 96997  | 96997  | 96997  | 96997  | FALSE | Genotoxin (C-X-C motif) domain 9 |
| 97273  | 0.222  | 1798   | 1423236 | 0.049  | 97273  | 97273   | 0.222  | 1798   | 1423236  | 0.049  | 97273  | 97273  | 97273  | 97273  | 97273  | FALSE | Genotoxin (C-X-C motif) domain 9 |
| 103322 | 0.047  | 5722   | 1418337 | 0.139  | 103322 | 103322  | 0.047  | 5722   | 1418337  | 0.139  | 103322 | 103322 | 103322 | 103322 | 103322 | FALSE | Genotoxin (C-X-C motif) domain 9 |
| 94181  | 0.034  | 7688   | 1415176 | 0.219  | 94181  | 94181   | 0.034  | 7688   | 1415176  | 0.219  | 94181  | 94181  | 94181  | 94181  | 94181  | FALSE | Genotoxin (C-X-C motif) domain 9 |
| 94191  | 0.170  | 3237   | 1415111 | 0.022  | 94191  | 94191   | 0.170  | 3237   | 1415111  | 0.022  | 94191  | 94191  | 94191  | 94191  | 94191  | FALSE | Genotoxin (C-X-C motif) domain 9 |
| 103056 | -0.144 | 2499   | 1427012 | 0.090  | 103056 | 103056  | -0.144 | 2499   | 1427012  | 0.090  | 103056 | 103056 | 103056 | 103056 | 103056 | FALSE | Genotoxin (C-X-C motif) domain 9 |
| 94846  | 0.088  | 6464   | 1421455 | 0.172  | 94846  | 94846   | 0.088  | 6464   | 1421455  | 0.172  | 94846  | 94846  | 94846  | 94846  | 94846  | FALSE | Genotoxin (C-X-C motif) domain 9 |
| 104122 | -0.026 | 6241   | 1423749 | 0.089  | 104122 | 104122  | -0.026 | 6241   | 1423749  | 0.089  | 104122 | 104122 | 104122 | 104122 | 104122 | FALSE | Genotoxin (C-X-C motif) domain 9 |
| 99917  | 0.136  | 5311   | 1423191 | 0.066  | 99917  | 99917   | 0.136  | 5311   | 1423191  | 0.066  | 99917  | 99917  | 99917  | 99917  | 99917  | FALSE | Genotoxin (C-X-C motif) domain 9 |
| 90225  | 0.077  | 4433   | 1427777 | 0.030  | 90225  | 90225   | 0.077  | 4433   | 1427777  | 0.030  | 90225  | 90225  | 90225  | 90225  | 90225  | FALSE | Genotoxin (C-X-C motif) domain 9 |
| 95963  | 0.012  | 8932   | 1419988 | 0.082  | 95963  | 95963   | 0.012  | 8932   | 1419988  | 0.082  | 95963  | 95963  | 95963  | 95963  | 95963  | FALSE | Genotoxin (C-X-C motif) domain 9 |
| 91461  | 0.122  | 2521   | 1425288 | 0.086  | 91461  | 91461   | 0.122  | 2521   | 1425288  | 0.086  | 91461  | 91461  | 91461  | 91461  | 91461  | FALSE | Genotoxin (C-X-C motif) domain 9 |
| 104440 | 0.148  | 2023   | 1423365 | -0.046 | 104440 | 104440  | 0.148  | 2023   | 1423365  | -0.046 | 104440 | 104440 | 104440 | 104440 | 104440 | FALSE | Genotoxin (C-X-C motif) domain 9 |
| 98918  | 0.074  | 5241   | 1450508 | 0.090  | 98918  | 98918   | 0.074  | 5241   | 1450508  | 0.090  | 98918  | 98918  | 98918  | 98918  | 98918  | FALSE | Genotoxin (C-X-C motif) domain 9 |
| 102020 | 0.038  | 5241   | 1450508 | 0.090  | 102020 | 102020  | 0.038  | 5241   | 1450508  | 0.090  | 102020 | 102020 | 102020 | 102020 | 102020 | FALSE | Genotoxin (C-X-C motif) domain 9 |
| 98918  | 0.074  | 5241   | 1450508 | 0.090  | 98918  | 98918   | 0.074  | 5241   | 1450508  | 0.090  | 98918  | 98918  | 98918  | 98918  | 98918  | FALSE | Genotoxin (C-X-C motif) domain 9 |
| 102962 | -0.017 | 7522   | 1449898 | 0.139  | 102962 | 102962  | -0.017 | 7522   | 1449898  | 0.139  | 102962 | 102962 | 102962 | 102962 | 102962 | FALSE | Genotoxin (C-X-C motif) domain 9 |
| 96085  | 0.079  | 6466   | 1416388 | 0.142  | 96085  | 96085   | 0.079  | 6466   | 1416388  | 0.142  | 96085  | 96085  | 96085  | 96085  | 96085  | FALSE | Genotoxin (C-X-C motif) domain 9 |
| 96085  | 0.079  | 6466   | 1416388 | 0.142  | 96085  | 96085   | 0.079  | 6466   | 1416388  | 0.142  | 96085  | 96085  | 96085  | 96085  | 96085  | FALSE | Genotoxin (C-X-C motif) domain 9 |
| 103092 | 0.166  | 2900   | 1451038 | -0.141 | 103092 | 103092  | 0.166  | 2900   | 1451038  | -0.141 | 103092 | 103092 | 103092 | 103092 | 103092 | FALSE | Genotoxin (C-X-C motif) domain 9 |
| 97818  | 0.040  | 5391   | 1424025 | 0.098  | 97818  | 97818   | 0.040  | 5391   | 1424025  | 0.098  | 97818  | 97818  | 97818  | 97818  | 97818  | FALSE | Genotoxin (C-X-C motif) domain 9 |
| 93985  | 0.041  | 6298   | 1426271 | 0.082  | 93985  | 93985   | 0.041  | 6298   | 1426271  | 0.082  | 93985  | 93985  | 93985  | 93985  | 93985  | FALSE | Genotoxin (C-X-C motif) domain 9 |
| 98918  | 0.074  | 5241   | 1450508 | 0.090  | 98918  | 98918   | 0.074  | 5241   | 1450508  | 0.090  | 98918  | 98918  | 98918  | 98918  | 98918  | FALSE | Genotoxin (C-X-C motif) domain 9 |
| 98918  | 0.074  | 5241   | 1450508 | 0.090  | 98918  | 98918   | 0.074  | 5241   | 1450508  | 0.090  | 98918  | 98918  | 98918  | 98918  | 98918  | FALSE | Genotoxin (C-X-C motif) domain 9 |





|        |        |      |         |        |        |         |        |      |         |       |        |      |         |       |      |      |         |        |       |         |                                       |                                       |                                       |
|--------|--------|------|---------|--------|--------|---------|--------|------|---------|-------|--------|------|---------|-------|------|------|---------|--------|-------|---------|---------------------------------------|---------------------------------------|---------------------------------------|
| 91120  | 0.071  | 5276 | 143146  | 0.103  | 4157.5 | 10170   | 0.103  | 4638 | 51870   | 0.103 | -0.099 | 4705 | 142164  | 0.154 | 3477 | 4650 | 875     | 747    | 10915 | FALSE   | mouse hybrid MDR1 integration site 2b |                                       |                                       |
| 91108  | 0.058  | 5777 | 141707  | -0.045 | 6152   | 9979    | -0.045 | 3381 | 144839  | 0.151 | -0.072 | 3975 | 142564  | 0.148 | 2255 | 4541 | 2429    | 381    | 2429  | 381     | FALSE                                 | mouse hybrid MDR1 integration site 2c |                                       |
| 91079  | 0.026  | 7420 | 141789  | 0.180  | 820    | 10058   | 0.180  | 2802 | 141789  | 0.115 | -0.075 | 2802 | 141789  | 0.047 | 7442 | 1466 | 3401    | 3578   | 1466  | 3401    | FALSE                                 | mouse hybrid MDR1 integration site 2d |                                       |
| 91078  | 0.223  | 8048 | 141696  | 0.020  | 725    | 10427   | 0.020  | 2006 | 141696  | 0.189 | -0.089 | 2006 | 141696  | 0.189 | 4630 | 4630 | 2101    | 1972   | 4630  | 4630    | FALSE                                 | mouse hybrid MDR1 integration site 2e |                                       |
| 91077  | 0.011  | 8041 | 144898  | 0.301  | 1848   | 5       | 0.301  | 8041 | 144898  | 0.063 | -0.063 | 8041 | 144898  | 0.063 | 4870 | 4870 | 1434    | 375    | 2488  | 2171    | FALSE                                 | mouse hybrid MDR1 integration site 2f |                                       |
| 140224 | -0.011 | 2527 | 141765  | 0.089  | 6491   | 100606  | 0.089  | 6672 | 143709  | 0.121 | -0.125 | 6672 | 143709  | 0.121 | 5803 | 5803 | 1170    | 3419   | 5803  | 5803    | FALSE                                 | mouse hybrid MDR1 integration site 2g |                                       |
| 100054 | 0.189  | 4292 | 141765  | 0.152  | 2504   | 5       | 0.152  | 2504 | 5       | 0.075 | -0.075 | 3152 | 141555  | 0.040 | 8010 | 8010 | 3152    | 141555 | 0.040 | 8010    | 8010                                  | FALSE                                 | mouse hybrid MDR1 integration site 2h |
| 142076 | -0.107 | 2700 | 1434133 | 0.041  | 5965   | 164794  | 0.041  | 5965 | 164794  | 0.054 | -0.054 | 6479 | 141314  | 0.040 | 5965 | 5965 | 164794  | 0.041  | 5965  | 164794  | FALSE                                 | mouse hybrid MDR1 integration site 2i |                                       |
| 140785 | -0.147 | 1168 | 1442599 | 0.020  | 8007   | 145299  | 0.020  | 8007 | 145299  | 0.042 | -0.042 | 6098 | 144646  | 0.040 | 6098 | 6098 | 144646  | 0.040  | 6098  | 144646  | FALSE                                 | mouse hybrid MDR1 integration site 2j |                                       |
| 140088 | 0.130  | 2565 | 1416085 | 0.048  | 5986   | 142031  | 0.048  | 5986 | 142031  | 0.035 | -0.035 | 6575 | 1430071 | 0.040 | 5986 | 5986 | 142031  | 0.040  | 5986  | 142031  | FALSE                                 | mouse hybrid MDR1 integration site 2k |                                       |
| 90201  | 0.335  | 214  | 1429209 | 0.200  | 1938   | 92029   | 0.200  | 1938 | 92029   | 0.029 | -0.029 | 1476 | 1429209 | 0.029 | 1938 | 1938 | 92029   | 0.029  | 1938  | 92029   | FALSE                                 | mouse hybrid MDR1 integration site 2l |                                       |
| 101142 | 0.284  | 166  | 1427115 | -0.005 | 8335   | 101742  | -0.005 | 8335 | 101742  | 0.122 | -0.122 | 2720 | 1427115 | 0.122 | 6682 | 6682 | 1427115 | 0.122  | 6682  | 1427115 | FALSE                                 | mouse hybrid MDR1 integration site 2m |                                       |
| 90996  | 0.107  | 359  | 1449586 | 0.160  | 359    | 1449586 | 0.160  | 359  | 1449586 | 0.040 | -0.040 | 4129 | 1449586 | 0.040 | 7703 | 7703 | 1449586 | 0.040  | 7703  | 1449586 | FALSE                                 | mouse hybrid MDR1 integration site 2n |                                       |
| 90960  | 0.285  | 472  | 1458011 | 0.077  | 472    | 1458011 | 0.077  | 472  | 1458011 | 0.007 | -0.007 | 8021 | 1419944 | 0.007 | 4673 | 4673 | 1419944 | 0.007  | 4673  | 1419944 | FALSE                                 | mouse hybrid MDR1 integration site 2o |                                       |
| 90044  | 0.004  | 4669 | 1429300 | -0.026 | 6509   | 99949   | -0.026 | 6509 | 99949   | 0.040 | -0.040 | 8021 | 1419944 | 0.040 | 4673 | 4673 | 1419944 | 0.040  | 4673  | 1419944 | FALSE                                 | mouse hybrid MDR1 integration site 2p |                                       |
| 100072 | 0.214  | 2132 | 1460008 | 0.099  | 4143   | 100373  | 0.099  | 4143 | 100373  | 0.024 | -0.024 | 8028 | 1460008 | 0.024 | 3829 | 3829 | 1460008 | 0.024  | 3829  | 1460008 | FALSE                                 | mouse hybrid MDR1 integration site 2q |                                       |
| 90488  | -0.043 | 5976 | 1450444 | 0.123  | 5976   | 1450444 | 0.123  | 5976 | 1450444 | 0.054 | -0.054 | 8028 | 1460008 | 0.054 | 3829 | 3829 | 1460008 | 0.054  | 3829  | 1460008 | FALSE                                 | mouse hybrid MDR1 integration site 2r |                                       |
| 140716 | -0.107 | 2700 | 1434133 | 0.041  | 5965   | 164794  | 0.041  | 5965 | 164794  | 0.054 | -0.054 | 6479 | 141314  | 0.040 | 5965 | 5965 | 164794  | 0.040  | 5965  | 164794  | FALSE                                 | mouse hybrid MDR1 integration site 2s |                                       |
| 140785 | -0.147 | 1168 | 1442599 | 0.020  | 8007   | 145299  | 0.020  | 8007 | 145299  | 0.042 | -0.042 | 6098 | 144646  | 0.040 | 6098 | 6098 | 144646  | 0.040  | 6098  | 144646  | FALSE                                 | mouse hybrid MDR1 integration site 2t |                                       |
| 140088 | 0.130  | 2565 | 1416085 | 0.048  | 5986   | 142031  | 0.048  | 5986 | 142031  | 0.035 | -0.035 | 6575 | 1430071 | 0.040 | 5986 | 5986 | 142031  | 0.040  | 5986  | 142031  | FALSE                                 | mouse hybrid MDR1 integration site 2u |                                       |
| 90201  | 0.335  | 214  | 1429209 | 0.200  | 1938   | 92029   | 0.200  | 1938 | 92029   | 0.029 | -0.029 | 1476 | 1429209 | 0.029 | 1938 | 1938 | 92029   | 0.029  | 1938  | 92029   | FALSE                                 | mouse hybrid MDR1 integration site 2v |                                       |
| 101142 | 0.284  | 166  | 1427115 | -0.005 | 8335   | 101742  | -0.005 | 8335 | 101742  | 0.122 | -0.122 | 2720 | 1427115 | 0.122 | 6682 | 6682 | 1427115 | 0.122  | 6682  | 1427115 | FALSE                                 | mouse hybrid MDR1 integration site 2w |                                       |
| 90996  | 0.107  | 359  | 1449586 | 0.160  | 359    | 1449586 | 0.160  | 359  | 1449586 | 0.040 | -0.040 | 4129 | 1449586 | 0.040 | 7703 | 7703 | 1449586 | 0.040  | 7703  | 1449586 | FALSE                                 | mouse hybrid MDR1 integration site 2x |                                       |
| 90960  | 0.285  | 472  | 1458011 | 0.077  | 472    | 1458011 | 0.077  | 472  | 1458011 | 0.007 | -0.007 | 8021 | 1419944 | 0.007 | 4673 | 4673 | 1419944 | 0.007  | 4673  | 1419944 | FALSE                                 | mouse hybrid MDR1 integration site 2y |                                       |
| 90044  | 0.004  | 4669 | 1429300 | -0.026 | 6509   | 99949   | -0.026 | 6509 | 99949   | 0.040 | -0.040 | 8021 | 1419944 | 0.040 | 4673 | 4673 | 1419944 | 0.040  | 4673  | 1419944 | FALSE                                 | mouse hybrid MDR1 integration site 2z |                                       |
| 100072 | 0.214  | 2132 | 1460008 | 0.099  | 4143   | 100373  | 0.099  | 4143 | 100373  | 0.024 | -0.024 | 8028 | 1460008 | 0.024 | 3829 | 3829 | 1460008 | 0.024  | 3829  | 1460008 | FALSE                                 | mouse hybrid MDR1 integration site 3a |                                       |
| 90488  | -0.043 | 5976 | 1450444 | 0.123  | 5976   | 1450444 | 0.123  | 5976 | 1450444 | 0.054 | -0.054 | 8028 | 1460008 | 0.054 | 3829 | 3829 | 1460008 | 0.054  | 3829  | 1460008 | FALSE                                 | mouse hybrid MDR1 integration site 3b |                                       |
| 140716 | -0.107 | 2700 | 1434133 | 0.041  | 5965   | 164794  | 0.041  | 5965 | 164794  | 0.054 | -0.054 | 6479 | 141314  | 0.040 | 5965 | 5965 | 164794  | 0.040  | 5965  | 164794  | FALSE                                 | mouse hybrid MDR1 integration site 3c |                                       |
| 140785 | -0.147 | 1168 | 1442599 | 0.020  | 8007   | 145299  | 0.020  | 8007 | 145299  | 0.042 | -0.042 | 6098 | 144646  | 0.040 | 6098 | 6098 | 144646  | 0.040  | 6098  | 144646  | FALSE                                 | mouse hybrid MDR1 integration site 3d |                                       |
| 140088 | 0.130  | 2565 | 1416085 | 0.048  | 5986   | 142031  | 0.048  | 5986 | 142031  | 0.035 | -0.035 | 6575 | 1430071 | 0.040 | 5986 | 5986 | 142031  | 0.040  | 5986  | 142031  | FALSE                                 | mouse hybrid MDR1 integration site 3e |                                       |
| 90201  | 0.335  | 214  | 1429209 | 0.200  | 1938   | 92029   | 0.200  | 1938 | 92029   | 0.029 | -0.029 | 1476 | 1429209 | 0.029 | 1938 | 1938 | 92029   | 0.029  | 1938  | 92029   | FALSE                                 | mouse hybrid MDR1 integration site 3f |                                       |
| 101142 | 0.284  | 166  | 1427115 | -0.005 | 8335   | 101742  | -0.005 | 8335 | 101742  | 0.122 | -0.122 | 2720 | 1427115 | 0.122 | 6682 | 6682 | 1427115 | 0.122  | 6682  | 1427115 | FALSE                                 | mouse hybrid MDR1 integration site 3g |                                       |
| 90996  | 0.107  | 359  | 1449586 | 0.160  | 359    | 1449586 | 0.160  | 359  | 1449586 | 0.040 | -0.040 | 4129 | 1449586 | 0.040 | 7703 | 7703 | 1449586 | 0.040  | 7703  | 1449586 | FALSE                                 | mouse hybrid MDR1 integration site 3h |                                       |
| 90960  | 0.285  | 472  | 1458011 | 0.077  | 472    | 1458011 | 0.077  | 472  | 1458011 | 0.007 | -0.007 | 8021 | 1419944 | 0.007 | 4673 | 4673 | 1419944 | 0.007  | 4673  | 1419944 | FALSE                                 | mouse hybrid MDR1 integration site 3i |                                       |
| 90044  | 0.004  | 4669 | 1429300 | -0.026 | 6509   | 99949   | -0.026 | 6509 | 99949   | 0.040 | -0.040 | 8021 | 1419944 | 0.040 | 4673 | 4673 | 1419944 | 0.040  | 4673  | 1419944 | FALSE                                 | mouse hybrid MDR1 integration site 3j |                                       |
| 100072 | 0.214  | 2132 | 1460008 | 0.099  | 4143   | 100373  | 0.099  | 4143 | 100373  | 0.024 | -0.024 | 8028 | 1460008 | 0.024 | 3829 | 3829 | 1460008 | 0.024  | 3829  | 1460008 | FALSE                                 | mouse hybrid MDR1 integration site 3k |                                       |
| 90488  | -0.043 | 5976 | 1450444 | 0.123  | 5976   | 1450444 | 0.123  | 5976 | 1450444 | 0.054 | -0.054 | 8028 | 1460008 | 0.054 | 3829 | 3829 | 1460008 | 0.054  | 3829  | 1460008 | FALSE                                 | mouse hybrid MDR1 integration site 3l |                                       |
| 140716 | -0.107 | 2700 | 1434133 | 0.041  | 5965   | 164794  | 0.041  | 5965 | 164794  | 0.054 | -0.054 | 6479 | 141314  | 0.040 | 5965 | 5965 | 164794  | 0.040  | 5965  | 164794  | FALSE                                 | mouse hybrid MDR1 integration site 3m |                                       |
| 140785 | -0.147 | 1168 | 1442599 | 0.020  | 8007   | 145299  | 0.020  | 8007 | 145299  | 0.042 | -0.042 | 6098 | 144646  | 0.040 | 6098 | 6098 | 144646  | 0.040  | 6098  | 144646  | FALSE                                 | mouse hybrid MDR1 integration site 3n |                                       |
| 140088 | 0.130  | 2565 | 1416085 | 0.048  | 5986   | 142031  | 0.048  | 5986 | 142031  | 0.035 | -0.035 | 6575 | 1430071 | 0.040 | 5986 | 5986 | 142031  | 0.040  | 5986  | 142031  | FALSE                                 | mouse hybrid MDR1 integration site 3o |                                       |
| 90201  | 0.335  | 214  | 1429209 | 0.200  | 1938   | 92029   | 0.200  | 1938 | 92029   | 0.029 | -0.029 | 1476 | 1429209 | 0.029 | 1938 | 1938 | 92029   | 0.029  | 1938  | 92029   | FALSE                                 | mouse hybrid MDR1 integration site 3p |                                       |
| 101142 | 0.284  | 166  | 1427115 | -0.005 | 8335   | 101742  | -0.005 | 8335 | 101742  | 0.122 | -0.122 | 2720 | 1427115 | 0.122 | 6682 | 6682 | 1427115 | 0.122  | 6682  | 1427115 | FALSE                                 | mouse hybrid MDR1 integration site 3q |                                       |
| 90996  | 0.107  | 359  | 1449586 | 0.160  | 359    | 1449586 | 0.160  | 359  | 1449586 | 0.040 | -0.040 | 4129 | 1449586 | 0.040 | 7703 | 7703 | 1449586 | 0.040  | 7703  | 1449586 | FALSE                                 | mouse hybrid MDR1 integration site 3r |                                       |
| 90960  | 0.285  | 472  | 1458011 | 0.077  | 472    | 1458011 | 0.077  | 472  | 1458011 | 0.007 | -0.007 | 8021 | 1419944 | 0.007 | 4673 | 4673 | 1419944 | 0.007  | 4673  | 1419944 | FALSE                                 | mouse hybrid MDR1 integration site 3s |                                       |
| 90044  | 0.004  | 4669 | 1429300 | -0.026 | 6509   | 99949   | -0.026 | 6509 | 99949   | 0.040 | -0.040 | 8021 | 1419944 | 0.040 | 4673 | 4673 | 1419944 | 0.040  | 4673  | 1419944 | FALSE                                 | mouse hybrid MDR1 integration site 3t |                                       |
| 100072 | 0.214  | 2132 | 1460008 | 0.099  | 4143   | 100373  | 0.099  | 4143 | 100373  | 0.024 | -0.024 | 8028 | 1460008 | 0.024 | 3829 | 3829 | 1460008 | 0.024  | 3829  | 1460008 | FALSE                                 | mouse hybrid MDR1 integration site 3u |                                       |
| 90488  | -0.043 | 5976 | 1450444 | 0.123  | 5976   | 1450444 | 0.123  | 5976 | 1450444 | 0.054 | -0.054 | 8028 | 1460008 | 0.054 | 3829 | 3829 | 1460008 | 0.054  | 3829  | 1460008 | FALSE                                 | mouse hybrid MDR1 integration site 3v |                                       |
| 140716 | -0.107 | 2700 | 1434133 | 0.041  | 5965   | 164794  | 0.041  | 5965 | 164794  | 0.054 | -0.054 | 6479 | 141314  | 0.040 | 5965 | 5965 | 164794  | 0.040  | 5965  | 164794  | FALSE                                 | mouse hybrid MDR1 integration site 3w |                                       |
| 140785 | -0.147 | 1168 | 1442599 | 0.020  | 8007   | 145299  | 0.020  | 8007 | 145299  | 0.042 | -0.042 | 6098 | 144646  | 0.040 | 6098 | 6098 | 144646  | 0.040  | 6098  | 144646  | FALSE                                 | mouse hybrid MDR1 integration site 3x |                                       |
| 140088 | 0.130  | 2565 | 1416085 | 0.048  | 5986   | 142031  | 0.048  | 5986 | 142031  | 0.035 | -0.035 | 6575 | 1430071 | 0.040 | 5986 | 5986 | 142031  | 0.040  | 5986  | 142031  | FALSE                                 | mouse hybrid MDR1 integration site 3y |                                       |
| 90201  | 0.335  | 214  | 1429209 | 0.200  | 1938   | 92029   | 0.200  | 1938 | 92029   | 0.029 | -0.029 | 1476 | 1429209 | 0.029 | 1938 | 1938 | 92029   | 0.029  | 1938  | 92029   | FALSE                                 | mouse hybrid MDR1 integration site 3z |                                       |
| 101142 | 0.284  | 166  | 1427115 | -0.005 | 8335   | 101742  | -0.005 | 8335 | 101742  | 0.122 | -0.122 | 2720 | 1427115 | 0.122 | 6682 | 6682 | 1427115 | 0.122  | 6682  | 1427115 | FALSE                                 | mouse hybrid MDR1 integration site 4a |                                       |
| 90996  | 0.107  | 359  | 1449586 | 0.160  | 359    | 144     |        |      |         |       |        |      |         |       |      |      |         |        |       |         |                                       |                                       |                                       |

|        |        |      |         |        |       |         |        |      |         |        |      |         |        |      |         |       |                                                 |
|--------|--------|------|---------|--------|-------|---------|--------|------|---------|--------|------|---------|--------|------|---------|-------|-------------------------------------------------|
| 99478  | 0.073  | 5451 | 1448511 | 0.054  | 6107  | 9978    | 0.050  | 5401 | 1448511 | 0.297  | 1733 | 4597    | 75     | 2568 | 1071    | TRUE  | protein tyrosine phosphatase 2                  |
| 99479  | 0.073  | 5432 | 1449279 | 0.050  | 5528  | 99910   | 0.050  | 3502 | 1438588 | -0.002 | 8495 | 4598    | 625    | 3009 | 9249    | FALSE | protein tyrosine phosphatase 2                  |
| 103031 | -0.048 | 5111 | 1452388 | 0.176  | 1235  | 10063   | 0.085  | 6822 | 1452388 | -0.002 | 8495 | 4598    | 625    | 3009 | 9249    | FALSE | protein tyrosine phosphatase 2                  |
| 93564  | -0.013 | 7819 | 1423779 | 0.144  | 10815 | 93651   | 0.048  | 6326 | 1438588 | 0.209  | 3355 | 4698    | 875    | 3071 | 10456   | FALSE | collin-like-related cell-cell contact protein 1 |
| 102027 | 0.025  | 4671 | 1418156 | 0.004  | 1026  | 10262   | 0.004  | 7126 | 1418156 | -0.122 | 4604 | 4995    | 208    | 3008 | 9008    | FALSE | protein tyrosine phosphatase 2                  |
| 101200 | 0.025  | 4671 | 1418156 | 0.004  | 1026  | 10262   | 0.004  | 7126 | 1418156 | -0.122 | 4604 | 4995    | 208    | 3008 | 9008    | FALSE | protein tyrosine phosphatase 2                  |
| 101520 | 0.045  | 5727 | 1418651 | 0.005  | 4080  | 101520  | 0.025  | 4671 | 1418156 | -0.238 | 1439 | 4597    | 75     | 2568 | 1071    | FALSE | protein tyrosine phosphatase 2                  |
| 99544  | -0.019 | 7850 | 1448442 | 0.250  | 2195  | 99544   | 0.019  | 3048 | 1448442 | 0.078  | 584  | 4600    | 370    | 2255 | 10277   | FALSE | protein tyrosine phosphatase 2                  |
| 151108 | -0.110 | 2929 | 1455408 | 0.104  | 110   | 110     | 0.110  | 2929 | 1455408 | -0.074 | 584  | 4600    | 370    | 2255 | 10277   | FALSE | protein tyrosine phosphatase 2                  |
| 101375 | 0.136  | 1450 | 1420251 | 0.003  | 4296  | 101375  | 0.136  | 1450 | 1420251 | -0.057 | 5161 | 4402    | 2178   | 4074 | 5161    | FALSE | protein tyrosine phosphatase 2                  |
| 94909  | -0.102 | 5087 | 1451728 | 0.090  | 5615  | 94909   | 0.102  | 0777 | 1451728 | 0.160  | 2994 | 4402    | 125    | 1150 | 1584    | FALSE | protein tyrosine phosphatase 2                  |
| 94432  | -0.059 | 6233 | 1449250 | 0.075  | 4604  | 94432   | 0.059  | 4604 | 1449250 | -0.094 | 3761 | 4440    | 250    | 1143 | 3572    | FALSE | protein tyrosine phosphatase 2                  |
| 96223  | -0.088 | 7239 | 1449283 | 0.003  | 6942  | 96223   | 0.088  | 7239 | 1449283 | 0.155  | 3169 | 4440    | 250    | 1143 | 3572    | FALSE | protein tyrosine phosphatase 2                  |
| 151071 | 0.041  | 5909 | 1429317 | 0.119  | 5909  | 1429317 | 0.041  | 5909 | 1429317 | 0.172  | 5257 | 4603    | 625    | 1580 | 2177    | FALSE | protein tyrosine phosphatase 2                  |
| 94046  | 0.088  | 7239 | 1449283 | 0.003  | 6942  | 94046   | 0.088  | 7239 | 1449283 | -0.094 | 3169 | 4440    | 250    | 1143 | 3572    | FALSE | protein tyrosine phosphatase 2                  |
| 99135  | -0.043 | 6044 | 1416819 | 0.098  | 3000  | 99135   | -0.043 | 6044 | 1416819 | -0.102 | 6672 | 4604    | 625    | 1580 | 2177    | FALSE | protein tyrosine phosphatase 2                  |
| 103339 | 0.002  | 8391 | 1422297 | 0.111  | 2713  | 103339  | 0.002  | 8391 | 1422297 | 0.044  | 6672 | 4604    | 625    | 1580 | 2177    | FALSE | protein tyrosine phosphatase 2                  |
| 94983  | -0.090 | 5819 | 1451783 | 0.126  | 2870  | 94983   | -0.090 | 5819 | 1451783 | -0.024 | 7497 | 4423    | 303    | 1384 | 3364    | FALSE | protein tyrosine phosphatase 2                  |
| 94182  | -0.029 | 6700 | 1420256 | -0.011 | 4604  | 94182   | -0.029 | 6700 | 1420256 | 0.156  | 1926 | 4605    | 375    | 333  | 5856    | FALSE | protein tyrosine phosphatase 2                  |
| 95158  | -0.099 | 4749 | 1415744 | 0.120  | 4604  | 95158   | -0.099 | 4749 | 1415744 | 0.173  | 5339 | 4414    | 714    | 2093 | 4199    | FALSE | protein tyrosine phosphatase 2                  |
| 151178 | 0.026  | 7099 | 1419333 | 0.075  | 5290  | 151178  | 0.026  | 7099 | 1419333 | -0.056 | 5290 | 4414    | 714    | 2093 | 4199    | FALSE | protein tyrosine phosphatase 2                  |
| 140874 | 0.141  | 2922 | 1416585 | 0.016  | 8131  | 140874  | 0.141  | 2922 | 1416585 | -0.122 | 2910 | 1416585 | 0.141  | 2922 | 1416585 | FALSE | protein tyrosine phosphatase 2                  |
| 96292  | 0.200  | 2405 | 1449240 | 0.032  | 7499  | 96292   | 0.200  | 2405 | 1449240 | -0.071 | 4603 | 1449240 | 0.200  | 2405 | 1449240 | FALSE | protein tyrosine phosphatase 2                  |
| 140072 | 0.000  | 4444 | 1420161 | 0.095  | 2962  | 140072  | 0.000  | 4444 | 1420161 | -0.113 | 5657 | 1420161 | 0.000  | 4444 | 1420161 | FALSE | protein tyrosine phosphatase 2                  |
| 102888 | -0.061 | 5292 | 1418066 | 0.102  | 7885  | 102888  | -0.061 | 5292 | 1418066 | 0.038  | 6405 | 1418066 | 0.061  | 5292 | 1418066 | FALSE | protein tyrosine phosphatase 2                  |
| 100599 | -0.002 | 8491 | 1429258 | 0.092  | 3915  | 100599  | -0.002 | 8491 | 1429258 | -0.097 | 4150 | 1429258 | 0.002  | 8491 | 1429258 | FALSE | protein tyrosine phosphatase 2                  |
| 990115 | -0.004 | 853  | 1448179 | 0.485  | 5774  | 990115  | -0.004 | 853  | 1448179 | 0.171  | 2777 | 1418156 | 0.004  | 853  | 1448179 | FALSE | protein tyrosine phosphatase 2                  |
| 100115 | 0.216  | 1318 | 1426289 | 0.130  | 6797  | 100115  | 0.216  | 1318 | 1426289 | 0.093  | 4132 | 1426289 | 0.216  | 1318 | 1426289 | FALSE | protein tyrosine phosphatase 2                  |
| 99559  | 0.139  | 1084 | 1452449 | 0.061  | 6084  | 99559   | 0.139  | 1084 | 1452449 | 0.001  | 6084 | 99559   | 0.139  | 1084 | 1452449 | FALSE | protein tyrosine phosphatase 2                  |
| 141222 | 0.016  | 6377 | 1423707 | -0.222 | 3124  | 141222  | 0.016  | 6377 | 1423707 | -0.045 | 2595 | 1423707 | 0.016  | 6377 | 1423707 | FALSE | protein tyrosine phosphatase 2                  |
| 96452  | 0.085  | 4188 | 1439771 | 0.094  | 3839  | 96452   | 0.085  | 4188 | 1439771 | -0.050 | 5908 | 141806  | 0.085  | 4188 | 1439771 | FALSE | protein tyrosine phosphatase 2                  |
| 96854  | 0.134  | 3872 | 1434628 | 0.040  | 6675  | 96854   | 0.134  | 3872 | 1434628 | -0.328 | 4928 | 141806  | 0.134  | 3872 | 1434628 | FALSE | protein tyrosine phosphatase 2                  |
| 151468 | 0.161  | 2153 | 1450253 | -0.011 | 8101  | 151468  | 0.161  | 2153 | 1450253 | -0.045 | 1242 | 1414766 | 0.161  | 2153 | 1450253 | FALSE | protein tyrosine phosphatase 2                  |
| 904448 | 0.007  | 3154 | 1419293 | 0.005  | 5745  | 904448  | 0.007  | 3154 | 1419293 | -0.183 | 7130 | 1414920 | 0.007  | 3154 | 1419293 | FALSE | protein tyrosine phosphatase 2                  |
| 100455 | 0.124  | 4041 | 1416688 | -0.089 | 4241  | 100455  | 0.124  | 4041 | 1416688 | -0.032 | 7958 | 1450904 | 0.124  | 4041 | 1416688 | FALSE | protein tyrosine phosphatase 2                  |
| 90046  | 0.074  | 7091 | 1453594 | 0.082  | 5520  | 90046   | 0.074  | 7091 | 1453594 | -0.144 | 2172 | 1414920 | 0.074  | 7091 | 1453594 | FALSE | protein tyrosine phosphatase 2                  |
| 100320 | 0.193  | 7031 | 1417974 | 0.047  | 7330  | 100320  | 0.193  | 7031 | 1417974 | -0.063 | 5583 | 1417974 | 0.193  | 7031 | 1417974 | FALSE | protein tyrosine phosphatase 2                  |
| 92712  | 0.121  | 3068 | 1422718 | 0.188  | 1179  | 92712   | 0.121  | 3068 | 1422718 | 0.108  | 8144 | 1422718 | 0.121  | 3068 | 1422718 | FALSE | protein tyrosine phosphatase 2                  |
| 102302 | -0.210 | 5490 | 1418392 | 0.106  | 5373  | 102302  | -0.210 | 5490 | 1418392 | 0.036  | 3573 | 102302  | 0.210  | 5490 | 1418392 | FALSE | protein tyrosine phosphatase 2                  |
| 97878  | 0.006  | 8190 | 1419231 | 0.088  | 1144  | 97878   | 0.006  | 8190 | 1419231 | 0.198  | 7936 | 1419231 | 0.006  | 8190 | 1419231 | FALSE | protein tyrosine phosphatase 2                  |
| 99882  | -0.173 | 1097 | 1446657 | 0.028  | 7254  | 99882   | -0.173 | 1097 | 1446657 | 0.040  | 7254 | 99882   | -0.173 | 1097 | 1446657 | FALSE | protein tyrosine phosphatase 2                  |
| 96588  | 0.006  | 8190 | 1419231 | 0.088  | 1144  | 96588   | 0.006  | 8190 | 1419231 | 0.198  | 7936 | 1419231 | 0.006  | 8190 | 1419231 | FALSE | protein tyrosine phosphatase 2                  |
| 151277 | -0.090 | 3478 | 1416429 | 0.022  | 5353  | 151277  | -0.090 | 3478 | 1416429 | 0.126  | 5353 | 151277  | -0.090 | 3478 | 1416429 | FALSE | protein tyrosine phosphatase 2                  |
| 96588  | -0.036 | 6674 | 1417208 | 0.222  | 514   | 96588   | -0.036 | 6674 | 1417208 | 0.023  | 7032 | 1417208 | 0.036  | 6674 | 1417208 | FALSE | protein tyrosine phosphatase 2                  |
| 101989 | -0.066 | 5882 | 1428782 | -0.098 | 4489  | 101989  | -0.066 | 5882 | 1428782 | -0.227 | 4489 | 101989  | 0.066  | 5882 | 1428782 | FALSE | protein tyrosine phosphatase 2                  |
| 99956  | 0.052  | 4437 | 1440785 | 0.003  | 8488  | 99956   | 0.052  | 4437 | 1440785 | 0.115  | 1604 | 140878  | 0.052  | 4437 | 1440785 | FALSE | protein tyrosine phosphatase 2                  |
| 100578 | 0.058  | 6389 | 1415875 | 0.182  | 6389  | 100578  | 0.058  | 6389 | 1415875 | -0.010 | 8183 | 1415875 | 0.058  | 6389 | 1415875 | FALSE | protein tyrosine phosphatase 2                  |
| 140317 | -0.094 | 5579 | 1416590 | 0.140  | 1259  | 140317  | -0.094 | 5579 | 1416590 | 0.050  | 6801 | 1416590 | 0.094  | 5579 | 1416590 | FALSE | protein tyrosine phosphatase 2                  |
| 96440  | 0.121  | 3580 | 1423479 | -0.131 | 4704  | 96440   | 0.121  | 3580 | 1423479 | -0.089 | 4704 | 96440   | 0.121  | 3580 | 1423479 | FALSE | protein tyrosine phosphatase 2                  |
| 97878  | 0.115  | 3414 | 1417115 | 0.049  | 4634  | 97878   | 0.115  | 3414 | 1417115 | 0.049  | 4634 | 97878   | 0.115  | 3414 | 1417115 | FALSE | protein tyrosine phosphatase 2                  |
| 97878  | 0.115  | 3414 | 1417115 | 0.049  | 4634  | 97878   | 0.115  | 3414 | 1417115 | 0.049  | 4634 | 97878   | 0.115  | 3414 | 1417115 | FALSE | protein tyrosine phosphatase 2                  |
| 94844  | -0.043 | 5044 | 1436171 | 0.098  | 4222  | 94844   | -0.043 | 5044 | 1436171 | 0.111  | 2156 | 1441621 | 0.043  | 5044 | 1436171 | FALSE | protein tyrosine phosphatase 2                  |
| 96359  | -0.075 | 4929 | 1415355 | 0.146  | 4182  | 96359   | -0.075 | 4929 | 1415355 | 0.019  | 7456 | 1415355 | 0.075  | 4929 | 1415355 | FALSE | protein tyrosine phosphatase 2                  |
| 100961 | -0.026 | 7031 | 1449444 | -0.189 | 1065  | 100961  | -0.026 | 7031 | 1449444 | 0.076  | 3376 | 1449444 | 0.026  | 7031 | 1449444 | FALSE | protein tyrosine phosphatase 2                  |
| 96264  | -0.128 | 7437 | 1452344 | 0.004  | 8478  | 96264   | -0.128 | 7437 | 1452344 | -0.039 | 6000 | 1426289 | 0.128  | 7437 | 1452344 | FALSE | protein tyrosine phosphatase 2                  |
| 96264  | -0.219 | 2282 | 1426498 | 0.113  | 3260  | 96264   | -0.219 | 2282 | 1426498 | 0.046  | 6000 | 1426289 | 0.219  | 2282 | 1426498 | FALSE | protein tyrosine phosphatase 2                  |
| 96869  | 0.310  | 7720 | 1416377 | 0.097  | 5353  | 96869   | 0.310  | 7720 | 1416377 | 0.054  | 5373 | 1416377 | 0.310  | 7720 | 1416377 | FALSE | protein tyrosine phosphatase 2                  |
| 101809 | 0.041  | 5238 | 1422771 | -0.081 | 4924  | 101809  | 0.041  | 5238 | 1422771 | -0.051 | 6070 | 1422771 | 0.041  | 5238 | 1422771 | FALSE | protein tyrosine phosphatase 2                  |
| 102021 | 0.146  | 3000 | 1421452 | 0.002  | 8300  | 102021  | 0.146  | 3000 | 1421452 | -0.002 | 8300 | 102021  | 0.146  | 3000 | 1421452 | FALSE | protein tyrosine phosphatase 2                  |
| 101424 | -0.001 | 8471 | 1428580 | 0.172  | 619   | 101424  | -0.001 | 8471 | 1428580 | 0.157  | 1084 | 1428580 | 0.001  | 8471 | 1428580 | FALSE | protein tyrosine phosphatase 2                  |
|        |        |      |         |        |       |         |        |      |         |        |      |         |        |      |         |       |                                                 |









|        |        |      |         |        |      |         |        |      |         |        |      |      |      |       |    |        |        |      |          |       |
|--------|--------|------|---------|--------|------|---------|--------|------|---------|--------|------|------|------|-------|----|--------|--------|------|----------|-------|
| 102078 | 0.138  | 2662 | 1453726 | 0.001  | 5951 | 102078  | 0.027  | 4627 | 1430733 | 0.145  | 3484 | 1884 | 4702 | TRUE  | MA | 211988 | 0.488  | 3424 | 1485E-01 | TRUE  |
| 102084 | 0.113  | 3272 | 1449290 | 0.077  | 7785 | 102084  | 0.022  | 4026 | 1449290 | 0.128  | 3702 | 1973 | 7644 | FALSE | MA | 228494 | -0.041 | 2825 | 5.00E-01 | FALSE |
| 102090 | -0.088 | 5139 | 1420715 | 0.077  | 5602 | 97925   | 0.048  | 5602 | 97925   | -0.145 | 3243 | 1449 | 6228 | FALSE | MA | 208510 | -0.075 | 1449 | 6.79E-01 | FALSE |
| 102096 | 0.109  | 3268 | 1448299 | 0.004  | 6006 | 16226   | 0.002  | 7834 | 16226   | 0.109  | 5299 | 2772 | 6221 | FALSE | MA | 217275 | 0.215  | 1727 | 7.50E-02 | FALSE |
| 102100 | 0.120  | 4492 | 1430986 | 0.004  | 5218 | 161738  | 0.002  | 3708 | 161738  | 0.120  | 5919 | 4834 | 25   | FALSE | MA | 217995 | 0.134  | 4834 | 2.19E-01 | FALSE |
| 94515  | -0.085 | 4492 | 1430986 | 0.004  | 5218 | 161738  | 0.002  | 3708 | 161738  | -0.144 | 3888 | 4834 | 25   | FALSE | MA | 220071 | 0.078  | 4834 | 2.56E-04 | FALSE |
| 148000 | -0.003 | 3517 | 1427200 | 0.048  | 6493 | 5       | 0.009  | 4279 | 98920   | -0.223 | 3219 | 4834 | 375  | FALSE | MA | 220118 | 0.084  | 4834 | 1.68E-02 | FALSE |
| 101358 | 0.103  | 2663 | 1446661 | 0.021  | 7725 | 101358  | 0.031  | 6108 | 141712  | -0.144 | 3888 | 4834 | 375  | FALSE | MA | 220118 | 0.078  | 4834 | 1.68E-02 | FALSE |
| 102400 | 0.224  | 2658 | 1434868 | 0.011  | 8124 | 104000  | 0.009  | 3788 | 142486  | -0.131 | 4800 | 4834 | 375  | FALSE | MA | 220118 | 0.148  | 4834 | 3.14E-01 | FALSE |
| 101149 | 0.023  | 7193 | 1450326 | 0.046  | 3075 | 101149  | -0.314 | 703  | 16320   | 0.028  | 7036 | 4834 | 375  | FALSE | MA | 220118 | 0.148  | 4834 | 3.14E-01 | FALSE |
| 92929  | 0.146  | 2729 | 1450752 | 0.007  | 5114 | 92929   | 0.047  | 3836 | 142758  | 0.034  | 7046 | 4834 | 375  | FALSE | MA | 220118 | 0.096  | 4834 | 2.13E-01 | FALSE |
| 161058 | -0.045 | 6149 | 1420537 | 0.006  | 6419 | 1420537 | 0.045  | 6626 | 1420537 | 0.170  | 2888 | 4834 | 375  | FALSE | MA | 220118 | -0.050 | 4834 | 2.53E-04 | FALSE |
| 94087  | -0.120 | 2884 | 1448979 | 0.013  | 5266 | 16038   | -0.091 | 4958 | 1448979 | -0.055 | 6344 | 4834 | 375  | FALSE | MA | 220118 | 0.089  | 4834 | 5.88E-04 | FALSE |
| 99126  | -0.208 | 7777 | 1427838 | 0.013  | 3025 | 99126   | -1.320 | 1890 | 1427838 | -0.130 | 6693 | 4834 | 375  | FALSE | MA | 220118 | 0.246  | 6693 | 2.23E-01 | FALSE |
| 92071  | 0.008  | 8501 | 1429589 | 0.013  | 2243 | 92071   | -0.075 | 4133 | 1429589 | -0.013 | 8153 | 4834 | 375  | FALSE | MA | 220118 | 0.089  | 4834 | 5.88E-04 | FALSE |
| 98881  | 0.023  | 7235 | 1421334 | 0.002  | 8452 | 98881   | 0.002  | 2148 | 142130  | -0.187 | 6415 | 4834 | 375  | FALSE | MA | 220118 | 0.066  | 4834 | 1.20E-02 | FALSE |
| 99815  | 0.103  | 3268 | 1442623 | 0.033  | 5203 | 99815   | 0.014  | 5053 | 1442623 | -0.111 | 5273 | 4834 | 375  | FALSE | MA | 220118 | 0.089  | 4834 | 5.88E-04 | FALSE |
| 143238 | 0.171  | 3422 | 1451851 | 0.012  | 3498 | 143238  | 0.125  | 5604 | 1451851 | -0.064 | 6692 | 4834 | 375  | FALSE | MA | 220118 | 0.044  | 6692 | 1.92E-01 | FALSE |
| 97959  | -0.080 | 5838 | 1424738 | 0.011  | 5838 | 1424738 | 0.006  | 7892 | 1441418 | 0.034  | 571  | 4834 | 375  | FALSE | MA | 220118 | -0.042 | 571  | 2.00E-01 | FALSE |
| 141050 | 0.099  | 5212 | 1435981 | 0.011  | 8118 | 141050  | 0.071  | 4279 | 1435981 | -0.249 | 1789 | 4834 | 375  | FALSE | MA | 217031 | 0.064  | 1789 | 1.53E-01 | FALSE |
| 100722 | 0.127  | 4472 | 1427467 | 0.019  | 6122 | 100722  | 0.131  | 6624 | 1427467 | -0.086 | 5982 | 4834 | 375  | FALSE | MA | 220118 | 0.082  | 5982 | 1.47E-02 | FALSE |
| 101016 | -0.123 | 4472 | 1427467 | 0.019  | 6122 | 101016  | -0.035 | 6346 | 1429050 | 0.043  | 7300 | 4834 | 375  | FALSE | MA | 220118 | -0.042 | 7300 | 2.00E-01 | FALSE |
| 9268   | 0.060  | 5238 | 1417882 | 0.006  | 3127 | 9268    | -0.012 | 7715 | 1417882 | 0.142  | 3172 | 4834 | 375  | FALSE | MA | 220118 | 0.089  | 4834 | 5.88E-04 | FALSE |
| 9828   | 0.034  | 5238 | 1417882 | 0.006  | 3127 | 9828    | 0.032  | 7402 | 1421900 | 0.096  | 4634 | 4834 | 375  | FALSE | MA | 220118 | 0.089  | 4634 | 5.88E-04 | FALSE |
| 10526  | 0.029  | 5214 | 1418322 | 0.052  | 6149 | 5       | 0.119  | 1473 | 1418322 | -0.091 | 6580 | 4834 | 375  | FALSE | MA | 220118 | 0.089  | 4834 | 5.88E-04 | FALSE |
| 92214  | -0.055 | 5704 | 1425252 | 0.011  | 4603 | 101722  | -0.042 | 5446 | 1416868 | -0.042 | 725  | 4834 | 375  | FALSE | MA | 220118 | 0.089  | 725  | 2.58E-05 | FALSE |
| 92327  | 0.031  | 629  | 1424169 | 0.006  | 4031 | 92327   | 0.170  | 589  | 1424169 | -0.018 | 8114 | 4834 | 375  | FALSE | MA | 220118 | 0.089  | 8114 | 3.30E-04 | FALSE |
| 104800 | -0.040 | 6146 | 1449230 | -0.002 | 5710 | 104800  | -0.136 | 1894 | 141788  | -0.093 | 5845 | 4834 | 375  | FALSE | MA | 220118 | 0.048  | 5845 | 1.89E-01 | FALSE |
| 97986  | 0.151  | 2106 | 1416385 | 0.014  | 7923 | 97986   | 0.044  | 2453 | 1416385 | -0.048 | 6655 | 4834 | 375  | FALSE | MA | 220118 | 0.089  | 6655 | 3.08E-01 | FALSE |
| 102099 | -0.014 | 7722 | 1454706 | -0.107 | 4835 | 102099  | -0.056 | 4627 | 1452221 | -0.162 | 2633 | 4834 | 375  | FALSE | MA | 220118 | 0.089  | 4627 | 2.19E-01 | FALSE |
| 99184  | 0.195  | 491  | 1421839 | 0.016  | 7143 | 5       | 0.037  | 6503 | 164141  | 0.269  | 5908 | 4834 | 375  | FALSE | MA | 220118 | 0.089  | 5908 | 3.01E-01 | FALSE |
| 98014  | 0.006  | 4628 | 1448280 | 0.009  | 5338 | 98014   | 0.037  | 6154 | 1448280 | -0.179 | 3267 | 4834 | 375  | FALSE | MA | 220118 | 0.089  | 3267 | 1.24E-01 | FALSE |
| 96569  | 0.113  | 4600 | 1417973 | 0.116  | 2735 | 96569   | 0.105  | 6837 | 1417973 | 0.105  | 5876 | 4834 | 375  | FALSE | MA | 220118 | 0.089  | 5876 | 1.82E-01 | FALSE |
| 94723  | 0.040  | 5205 | 1422559 | 0.006  | 6156 | 94723   | 0.049  | 5205 | 1422559 | 0.034  | 7526 | 4834 | 375  | FALSE | MA | 220118 | 0.089  | 7526 | 4.86E-05 | FALSE |
| 92988  | 0.039  | 4434 | 1449818 | 0.003  | 4434 | 92988   | 0.003  | 5524 | 94123   | 0.172  | 2936 | 4834 | 375  | FALSE | MA | 220118 | 0.089  | 2936 | 1.56E-01 | FALSE |
| 92481  | 0.230  | 1207 | 1422747 | 0.041  | 345  | 92481   | 0.088  | 4442 | 1422747 | -0.001 | 8652 | 4834 | 375  | FALSE | MA | 220118 | 0.089  | 8652 | 3.31E-03 | FALSE |
| 102338 | -0.066 | 5239 | 1449403 | -0.018 | 7007 | 102338  | 0.478  | 450  | 1449403 | 0.096  | 5812 | 4834 | 375  | FALSE | MA | 220118 | 0.089  | 5812 | 3.14E-02 | FALSE |
| 140127 | -0.028 | 7800 | 1459977 | -0.024 | 7742 | 140127  | -0.024 | 2969 | 1449741 | 0.470  | 1649 | 4834 | 375  | FALSE | MA | 220118 | 0.089  | 1649 | 2.99E-01 | FALSE |
| 94634  | 0.188  | 5426 | 1460672 | 0.004  | 4694 | 94634   | 0.084  | 2511 | 1460672 | -0.141 | 7537 | 4834 | 375  | FALSE | MA | 220118 | 0.089  | 7537 | 2.10E-01 | FALSE |
| 92543  | 0.077  | 4490 | 1451993 | 0.004  | 4490 | 92543   | 0.004  | 6433 | 1451993 | 0.239  | 4481 | 4834 | 375  | FALSE | MA | 220118 | 0.089  | 4481 | 2.38E-01 | FALSE |
| 92543  | 0.077  | 4490 | 1451993 | 0.004  | 4490 | 92543   | 0.004  | 6433 | 1451993 | 0.114  | 7172 | 4834 | 375  | FALSE | MA | 220118 | 0.089  | 7172 | 2.38E-01 | FALSE |
| 92543  | 0.077  | 4490 | 1451993 | 0.004  | 4490 | 92543   | 0.004  | 6433 | 1451993 | 0.114  | 7172 | 4834 | 375  | FALSE | MA | 220118 | 0.089  | 7172 | 2.38E-01 | FALSE |
| 94358  | 0.136  | 4692 | 1427119 | 0.006  | 4692 | 94358   | 0.006  | 1336 | 1427119 | 0.002  | 6065 | 4834 | 375  | FALSE | MA | 220118 | 0.089  | 6065 | 2.84E-01 | FALSE |
| 92666  | 0.006  | 8212 | 1423155 | 0.148  | 1776 | 92666   | 0.011  | 7730 | 1423155 | -0.247 | 1529 | 4834 | 375  | FALSE | MA | 220118 | 0.089  | 1529 | 1.74E-02 | FALSE |
| 145400 | 0.108  | 3576 | 1426888 | 0.031  | 7361 | 145400  | 0.041  | 5646 | 1426888 | -0.179 | 2994 | 4834 | 375  | FALSE | MA | 220118 | 0.089  | 2994 | 2.04E-04 | FALSE |
| 92666  | 0.006  | 8212 | 1423155 | 0.148  | 1776 | 92666   | 0.011  | 7730 | 1423155 | -0.247 | 1529 | 4834 | 375  | FALSE | MA | 220118 | 0.089  | 1529 | 1.74E-02 | FALSE |
| 102720 | -0.017 | 7773 | 1418788 | -0.004 | 5200 | 102720  | -0.004 | 5200 | 102720  | -0.202 | 4022 | 4834 | 375  | FALSE | MA | 220118 | 0.089  | 4022 | 3.07E-02 | FALSE |
| 94491  | 0.002  | 8431 | 1419455 | 0.071  | 4833 | 94491   | 0.071  | 3075 | 1419455 | 0.150  | 3141 | 4834 | 375  | FALSE | MA | 220118 | 0.089  | 3141 | 1.80E-02 | FALSE |
| 140181 | -0.041 | 5933 | 1465499 | 0.150  | 3493 | 140181  | 0.061  | 7082 | 1448280 | 0.253  | 3231 | 4834 | 375  | FALSE | MA | 220118 | 0.089  | 3231 | 1.90E-01 | FALSE |
| 140181 | -0.041 | 5933 | 1465499 | 0.150  | 3493 | 140181  | 0.061  | 7082 | 1448280 | 0.253  | 3231 | 4834 | 375  | FALSE | MA | 220118 | 0.089  | 3231 | 1.90E-01 | FALSE |
| 140181 | -0.041 | 5933 | 1465499 | 0.150  | 3493 | 140181  | 0.061  | 7082 | 1448280 | 0.253  | 3231 | 4834 | 375  | FALSE | MA | 220118 | 0.089  | 3231 | 1.90E-01 | FALSE |
| 102036 | 0.008  | 5260 | 1435280 | 0.123  | 2782 | 102036  | 0.042  | 5725 | 1435280 | -0.133 | 5031 | 4834 | 375  | FALSE | MA | 220118 | 0.089  | 5031 | 1.83E-01 | FALSE |
| 95148  | -0.046 | 4686 | 1448450 | 0.115  | 3373 | 95148   | 0.115  | 3373 | 95148   | -0.023 | 4488 | 4834 | 375  | FALSE | MA | 220118 | 0.089  | 4488 | 1.62E-02 | FALSE |
| 102429 | 0.010  | 6628 | 1456286 | 0.079  | 6628 | 102429  | 0.010  | 6628 | 1456286 | -0.095 | 5129 | 4834 | 375  | FALSE | MA | 220118 | 0.089  | 5129 | 2.59E-02 | FALSE |
| 102936 | 0.044  | 6628 | 1456286 | 0.079  | 6628 | 102936  | 0.044  | 6628 | 1456286 | -0.095 | 5129 | 4834 | 375  | FALSE | MA | 220118 | 0.089  | 5129 | 2.59E-02 | FALSE |
| 102936 | 0.044  | 6628 | 1456286 | 0.079  | 6628 | 102936  | 0.044  | 6628 | 1456286 | -0.095 | 5129 | 4834 | 375  | FALSE | MA | 220118 | 0.089  | 5129 | 2.59E-02 | FALSE |
| 142199 | 0.173  | 2507 | 1449466 | 0.009  | 4433 | 142199  | -0.052 | 5932 | 1449466 | -0.056 | 4722 | 4834 | 375  | FALSE | MA | 220118 | 0.089  | 4722 | 1.80E-02 | FALSE |
| 99114  | 0.004  | 8323 | 1423274 | -0.127 | 3583 | 99114   | 0.004  | 3583 | 99114   | 0.175  | 4142 | 4834 | 375  | FALSE | MA | 220118 | 0.089  | 4142 | 2.29E-01 | FALSE |
| 102608 | 0.004  | 8323 | 1423274 | -0.127 | 3583 | 102608  | 0.004  | 3583 | 99114   | 0.175  | 4142 | 4834 | 375  | FALSE | MA | 220118 | 0.089  | 4142 | 2.29E-01 | FALSE |
| 92968  | -0.041 | 6661 | 1450623 | 0.083  | 4661 | 92968   | -0.041 | 6661 | 1450623 | -0.187 | 1798 | 4834 | 375  | FALSE | MA | 220118 | 0.089  | 1798 | 2.36E-04 | FALSE |
| 102608 | 0.004  | 8323 | 1423274 | -0.127 | 3583 | 102608  | 0.004  | 3583 | 99114   | 0.175  | 4142 | 4834 | 375  | FALSE | MA | 22     |        |      |          |       |







|         |        |      |         |        |      |         |        |      |         |        |      |          |      |      |       |                        |        |   |        |        |       |
|---------|--------|------|---------|--------|------|---------|--------|------|---------|--------|------|----------|------|------|-------|------------------------|--------|---|--------|--------|-------|
| 1010782 | -0.031 | 6726 | 1425358 | 0.103  | 5226 | 101203  | -0.029 | 6174 | 1458581 | 0.095  | 5856 | 150475   | 2793 | 5441 | FALSE | BDI domain 1 (forward) | 224650 | 5 | 0.025  | 214126 | FALSE |
| 918874  | 0.032  | 5824 | 1418064 | 0.133  | 2403 | 918874  | -0.025 | 7236 | 1418064 | -0.113 | 4061 | 510476   | 2031 | 3978 | FALSE | noncoding exon, CUI    | 213561 | 5 | 0.035  | 28208  | FALSE |
| 1518988 | 0.110  | 3482 | 1418222 | 0.027  | 6972 | 1518988 | -0.049 | 6050 | 1418222 | -0.074 | 3111 | 510625   | 1669 | 9174 | FALSE | noncoding exon 3       | 213448 | 5 | -0.182 | 213448 | FALSE |
| 9101729 | 0.030  | 6026 | 1422019 | 0.003  | 8020 | 9101729 | -0.066 | 4209 | 1422019 | 0.230  | 4249 | 510625   | 2427 | 5228 | FALSE | non coding region      | 212407 | 5 | 0.023  | 212407 | FALSE |
| 942229  | -0.072 | 4379 | 1448412 | 0.007  | 4042 | 942229  | -0.042 | 5265 | 1448412 | -0.218 | 2943 | 510925   | 2380 | 9929 | FALSE | non coding region      | 212004 | 5 | 0.307  | 212004 | FALSE |
| 96390   | 0.034  | 6632 | 1419555 | 0.048  | 6640 | 96390   | -0.004 | 6411 | 1419555 | -0.188 | 3036 | 5110125  | 1914 | 8697 | FALSE | non coding region      | 211622 | 5 | 0.138  | 211622 | FALSE |
| 96390   | 0.103  | 3711 | 1446572 | 0.004  | 5868 | 96390   | -0.061 | 5479 | 1446572 | -0.096 | 5370 | 5110125  | 958  | 6084 | FALSE | non coding region      | 211622 | 5 | 0.083  | 211622 | FALSE |
| 99971   | 0.040  | 4201 | 1423123 | 0.034  | 4647 | 99971   | -0.049 | 4895 | 1423123 | -0.126 | 4409 | 5110125  | 1304 | 4655 | FALSE | non coding region      | 211622 | 5 | 0.003  | 211622 | FALSE |
| 1403956 | -0.041 | 6691 | 1423955 | 0.003  | 5599 | 1403956 | -0.105 | 2210 | 1423955 | -0.105 | 5939 | 5110125  | 1887 | 342  | FALSE | non coding region      | 222121 | 5 | 0.316  | 222121 | FALSE |
| 94638   | -0.013 | 4691 | 1425868 | 0.100  | 4230 | 94638   | -0.020 | 5637 | 1425868 | -0.074 | 4482 | 5111775  | 1806 | 6159 | FALSE | non coding region      | 209664 | 5 | 0.147  | 209664 | FALSE |
| 96972   | -0.216 | 1422 | 1457096 | 0.080  | 6274 | 96972   | -0.115 | 5851 | 1457096 | -0.049 | 6720 | 5111775  | 2319 | 9627 | FALSE | non coding region      | 209664 | 5 | -0.179 | 209664 | FALSE |
| 140382  | -0.079 | 4753 | 1448414 | 0.034  | 7059 | 140382  | -0.046 | 7205 | 1448414 | -0.236 | 1485 | 5113     | 2462 | 8372 | FALSE | non coding region      | 209393 | 5 | -0.179 | 209393 | FALSE |
| 95370   | -0.066 | 6176 | 1435272 | 0.104  | 3828 | 95370   | -0.005 | 6290 | 1435272 | -0.246 | 2156 | 511425   | 2245 | 7138 | FALSE | non coding region      | 209393 | 5 | 0.177  | 209393 | FALSE |
| 94727   | 0.110  | 3278 | 1418754 | 0.037  | 7448 | 94727   | -0.037 | 6126 | 1418754 | -0.076 | 6613 | 5116375  | 2188 | 8844 | FALSE | non coding region      | 209051 | 5 | -0.007 | 209051 | FALSE |
| 1000518 | 0.026  | 4231 | 1427111 | -0.139 | 3721 | 1000518 | -0.025 | 3126 | 1427111 | -0.076 | 6613 | 5116375  | 2188 | 8844 | FALSE | non coding region      | 209051 | 5 | 0.331  | 209051 | FALSE |
| 1034677 | 0.238  | 3293 | 1417560 | 0.125  | 3311 | 1034677 | -0.002 | 8849 | 1417560 | -0.040 | 7758 | 5117125  | 3695 | 6455 | FALSE | non coding region      | 208620 | 5 | 0.056  | 208620 | FALSE |
| 974881  | -0.147 | 1429 | 1422353 | 0.034  | 4693 | 974881  | -0.034 | 3945 | 1422353 | -0.010 | 4802 | 5117125  | 3035 | 8488 | FALSE | non coding region      | 222348 | 5 | 0.088  | 222348 | FALSE |
| 101981  | 0.105  | 2481 | 1416572 | 0.078  | 4163 | 101981  | -0.068 | 5647 | 1416572 | -0.018 | 4414 | 5118337  | 2253 | 2022 | FALSE | non coding region      | 218215 | 5 | 0.049  | 218215 | FALSE |
| 100059  | -0.083 | 2891 | 1414548 | 0.038  | 4072 | 100059  | -0.054 | 4793 | 1414548 | -0.243 | 4444 | 5118337  | 1141 | 3519 | FALSE | non coding region      | 218119 | 5 | 0.026  | 218119 | FALSE |
| 96514   | 0.125  | 2456 | 1426103 | 0.050  | 5734 | 96514   | -0.051 | 4426 | 1426103 | -0.243 | 4444 | 5118337  | 1141 | 3519 | FALSE | non coding region      | 218119 | 5 | 0.226  | 218119 | FALSE |
| 96588   | 0.067  | 2456 | 1426103 | -0.020 | 4659 | 96588   | -0.119 | 2225 | 1426103 | -0.089 | 5923 | 512025   | 2392 | 9725 | FALSE | non coding region      | 220993 | 5 | 0.021  | 220993 | FALSE |
| 151032  | 0.131  | 2381 | 1419325 | 0.079  | 4846 | 151032  | -0.062 | 5174 | 1419325 | -0.036 | 7811 | 512025   | 2193 | 9788 | FALSE | non coding region      | 206023 | 5 | -0.015 | 206023 | FALSE |
| 92769   | -0.048 | 5733 | 1448719 | 0.063  | 4846 | 92769   | -0.020 | 4846 | 1448719 | -0.246 | 5488 | 512175   | 580  | 2847 | FALSE | non coding region      | 201388 | 5 | -0.191 | 201388 | FALSE |
| 94303   | -0.143 | 2524 | 1417258 | 0.010  | 6263 | 94303   | -0.071 | 6263 | 1417258 | -0.328 | 1004 | 5121775  | 3681 | 1548 | FALSE | non coding region      | 219771 | 5 | 0.177  | 219771 | FALSE |
| 94571   | -0.084 | 4701 | 1420588 | 0.045  | 5625 | 94571   | -0.054 | 6242 | 1420588 | -0.132 | 3926 | 5121775  | 1018 | 9957 | FALSE | non coding region      | 219771 | 5 | 0.001  | 219771 | FALSE |
| 92573   | 0.030  | 4481 | 1427262 | 0.082  | 4812 | 92573   | -0.064 | 4812 | 1427262 | -0.015 | 8133 | 5121775  | 2156 | 2081 | FALSE | non coding region      | 219771 | 5 | 0.005  | 219771 | FALSE |
| 99462   | 0.034  | 6771 | 1420794 | 0.096  | 4813 | 99462   | -0.006 | 7597 | 1420794 | 0.246  | 1989 | 5121775  | 2060 | 458  | FALSE | non coding region      | 218425 | 5 | 0.001  | 218425 | FALSE |
| 99462   | 0.035  | 6821 | 1425474 | 0.042  | 4682 | 99462   | -0.046 | 4832 | 1425474 | -0.210 | 2028 | 512425   | 2171 | 5899 | FALSE | non coding region      | 218425 | 5 | 0.135  | 218425 | FALSE |
| 90780   | -0.011 | 8055 | 1417716 | 0.028  | 5399 | 90780   | -0.079 | 5600 | 1417716 | -0.078 | 6246 | 5125125  | 3191 | 7298 | FALSE | non coding region      | 218425 | 5 | -0.135 | 218425 | FALSE |
| 102749  | -0.053 | 5904 | 1422526 | 0.058  | 5883 | 102749  | -0.116 | 5883 | 1422526 | -0.078 | 5993 | 5125125  | 1603 | 8424 | FALSE | non coding region      | 218425 | 5 | -0.127 | 218425 | FALSE |
| 102749  | 0.135  | 2128 | 1440272 | -0.049 | 7133 | 102749  | -0.029 | 6737 | 1440272 | -0.097 | 4454 | 5125125  | 2255 | 6029 | FALSE | non coding region      | 207140 | 5 | 0.008  | 207140 | FALSE |
| 97323   | -0.111 | 2717 | 1416488 | -0.017 | 8073 | 97323   | -0.096 | 6874 | 1416488 | -0.323 | 7613 | 5125125  | 2817 | 2828 | FALSE | non coding region      | 217929 | 5 | -0.086 | 217929 | FALSE |
| 97084   | -0.111 | 7424 | 1415156 | 0.120  | 5844 | 97084   | -0.056 | 6026 | 1415156 | -0.039 | 7613 | 5125125  | 1140 | 9921 | FALSE | non coding region      | 216083 | 5 | 0.327  | 216083 | FALSE |
| 92509   | 0.050  | 5949 | 1438397 | 0.131  | 2720 | 92509   | -0.088 | 4182 | 1438397 | -0.039 | 7619 | 5125125  | 217  | 2922 | FALSE | non coding region      | 215871 | 5 | 0.001  | 215871 | FALSE |
| 92509   | -0.079 | 5949 | 1448297 | 0.104  | 1524 | 92509   | -0.044 | 5318 | 1448297 | -0.058 | 6640 | 5127125  | 1746 | 6464 | FALSE | non coding region      | 209771 | 5 | 0.005  | 209771 | FALSE |
| 102396  | 0.037  | 6258 | 1423088 | 0.053  | 6280 | 102396  | -0.033 | 3853 | 1423088 | -0.014 | 4122 | 512825   | 1321 | 9251 | FALSE | non coding region      | 212824 | 5 | 0.077  | 212824 | FALSE |
| 96512   | 0.068  | 5420 | 1426255 | 0.048  | 5042 | 96512   | -0.051 | 4473 | 1426255 | -0.130 | 5359 | 512825   | 1897 | 8637 | FALSE | non coding region      | 220850 | 5 | 0.178  | 220850 | FALSE |
| 101643  | -0.033 | 6798 | 1417074 | 0.144  | 6251 | 101643  | -0.033 | 6051 | 1417074 | -0.103 | 5591 | 512825   | 1897 | 8637 | FALSE | non coding region      | 219789 | 5 | 0.029  | 219789 | FALSE |
| 140078  | -0.042 | 4627 | 1436716 | 0.105  | 4776 | 140078  | -0.008 | 5129 | 1436716 | -0.182 | 3479 | 512925   | 2464 | 4339 | FALSE | non coding region      | 218686 | 5 | 0.303  | 218686 | FALSE |
| 94615   | -0.048 | 6471 | 1426254 | -0.052 | 6347 | 94615   | -0.174 | 5305 | 1426254 | -0.192 | 2178 | 512925   | 1507 | 6702 | FALSE | non coding region      | 218686 | 5 | 0.186  | 218686 | FALSE |
| 100781  | 0.049  | 4089 | 1440275 | 0.070  | 7450 | 100781  | -0.011 | 6740 | 1440275 | -0.173 | 3344 | 51315    | 1419 | 3222 | FALSE | non coding region      | 212157 | 5 | 0.102  | 212157 | FALSE |
| 102079  | 0.133  | 2279 | 1426790 | 0.026  | 7450 | 102079  | -0.089 | 6129 | 1426790 | -0.079 | 8035 | 51312125 | 3080 | 5626 | FALSE | non coding region      | 21482  | 5 | -0.046 | 21482  | FALSE |
| 94240   | 0.036  | 6781 | 1422722 | 0.044  | 6992 | 94240   | -0.044 | 5557 | 1422722 | -0.246 | 4230 | 5132125  | 1462 | 9866 | FALSE | non coding region      | 202848 | 5 | -0.012 | 202848 | FALSE |
| 103101  | 0.105  | 2878 | 142316  | 0.114  | 1947 | 103101  | -0.099 | 7936 | 142316  | -0.024 | 7721 | 5133     | 1316 | 1214 | FALSE | non coding region      | 202848 | 5 | 0.029  | 202848 | FALSE |
| 103243  | 0.039  | 6422 | 1423889 | 0.136  | 6105 | 103243  | -0.032 | 5946 | 1423889 | -0.024 | 7857 | 513337   | 2697 | 4868 | FALSE | non coding region      | 202848 | 5 | 0.029  | 202848 | FALSE |
| 96469   | 0.229  | 3239 | 1417191 | -0.005 | 4728 | 96469   | -0.045 | 2403 | 1417191 | -0.028 | 7572 | 513337   | 2446 | 4534 | FALSE | non coding region      | 202848 | 5 | -0.046 | 202848 | FALSE |
| 140611  | 0.028  | 5115 | 1447071 | 0.134  | 1832 | 140611  | -0.016 | 4173 | 1447071 | -0.159 | 3491 | 513425   | 2815 | 3041 | FALSE | non coding region      | 219297 | 5 | 0.091  | 219297 | FALSE |
| 97125   | -0.142 | 7151 | 1442534 | 0.114  | 3218 | 97125   | -0.099 | 5824 | 1442534 | -0.054 | 6956 | 513425   | 1342 | 9351 | FALSE | non coding region      | 222691 | 5 | 0.001  | 222691 | FALSE |
| 101915  | 0.110  | 4413 | 1418382 | 0.162  | 3440 | 101915  | -0.024 | 4030 | 1418382 | -0.004 | 8406 | 513425   | 2280 | 9445 | FALSE | non coding region      | 205014 | 5 | 0.304  | 205014 | FALSE |
| 100905  | 0.040  | 5325 | 1418477 | 0.098  | 2946 | 100905  | -0.025 | 6735 | 1418477 | -0.118 | 5529 | 51405    | 1538 | 6128 | FALSE | non coding region      | 217900 | 5 | 0.102  | 217900 | FALSE |
| 92506   | 0.089  | 3272 | 1425566 | 0.104  | 8173 | 92506   | -0.038 | 1180 | 1425566 | -0.048 | 7338 | 5141125  | 3088 | 8049 | FALSE | non coding region      | 204883 | 5 | 0.149  | 204883 | FALSE |
| 94240   | 0.117  | 2094 | 1417446 | 0.080  | 4974 | 94240   | -0.074 | 5128 | 1417446 | -0.038 | 7360 | 5141125  | 2239 | 6242 | FALSE | non coding region      | 204883 | 5 | 0.139  | 204883 | FALSE |

|        |        |      |         |        |      |         |        |      |         |        |      |         |        |      |      |      |      |       |                                                                                      |
|--------|--------|------|---------|--------|------|---------|--------|------|---------|--------|------|---------|--------|------|------|------|------|-------|--------------------------------------------------------------------------------------|
| 102014 | -0.111 | 2541 | 141709  | 0.039  | 7032 | 100131  | -0.150 | 3257 | 141709  | 0.041  | 3257 | 141709  | 0.041  | 7150 | 5148 | 255  | 3448 | FALSE | solid core protein family 27 (cysteine, amino acid transporter, v. sodium), member 8 |
| 102015 | -0.111 | 5794 | 141616  | 0.053  | 5794 | 141616  | -0.132 | 1779 | 141616  | 0.040  | 1779 | 141616  | 0.040  | 5148 | 5148 | 255  | 3448 | FALSE | solid core protein family 27 (cysteine, amino acid transporter, v. sodium), member 8 |
| 102016 | -0.099 | 618  | 142586  | 0.146  | 618  | 142586  | -0.114 | 738  | 142586  | 0.064  | 738  | 142586  | 0.064  | 4835 | 5149 | 261  | 9911 | FALSE | member of RNA polymerase III transcription, subunit 12 (homologous)                  |
| 102017 | -0.121 | 3853 | 142327  | 0.030  | 3853 | 142327  | 0.040  | 4720 | 142327  | 0.040  | 4720 | 142327  | 0.040  | 4835 | 5170 | 1474 | 9794 | FALSE | RNKB2 domain 2 (homologous)                                                          |
| 102018 | -0.038 | 466  | 144938  | 0.035  | 466  | 144938  | -0.076 | 662  | 144938  | 0.035  | 662  | 144938  | 0.035  | 5025 | 5170 | 227  | 401  | FALSE | RNA polymerase 2                                                                     |
| 102019 | -0.081 | 4181 | 142130  | 0.029  | 4181 | 142130  | 0.029  | 5148 | 142130  | 0.029  | 5148 | 142130  | 0.029  | 5025 | 5170 | 227  | 401  | FALSE | RNA polymerase 2                                                                     |
| 102020 | -0.019 | 7088 | 142232  | 0.139  | 7088 | 142232  | 0.039  | 277  | 142232  | 0.039  | 277  | 142232  | 0.039  | 7897 | 5171 | 375  | 1713 | FALSE | RNA polymerase 2                                                                     |
| 102021 | 0.206  | 4132 | 145019  | 0.116  | 4132 | 145019  | 0.116  | 2542 | 9995    | 0.046  | 2542 | 9995    | 0.046  | 9339 | 5172 | 255  | 6654 | TRUE  | sex determination region of DmY                                                      |
| 102022 | 0.243  | 2888 | 142537  | 0.003  | 2888 | 142537  | 0.003  | 8188 | 9413    | 0.135  | 8188 | 9413    | 0.135  | 4692 | 5173 | 225  | 5038 | FALSE | sex determination region of DmY                                                      |
| 102023 | 0.193  | 4851 | 144815  | 0.078  | 4851 | 144815  | 0.078  | 4051 | 10364   | 0.040  | 4051 | 10364   | 0.040  | 7775 | 5174 | 325  | 7171 | FALSE | muscle-specific MYH interaction site 1                                               |
| 102024 | 0.045  | 6099 | 142350  | -0.048 | 6099 | 142350  | -0.048 | 6000 | 97857   | 0.029  | 6000 | 97857   | 0.029  | 4995 | 5175 | 284  | 7123 | FALSE | muscle-specific MYH interaction site 1                                               |
| 102025 | 0.019  | 7464 | 141712  | 0.123  | 7464 | 141712  | 0.123  | 4838 | 141712  | 0.042  | 4838 | 141712  | 0.042  | 4995 | 5176 | 154  | 3383 | FALSE | muscle-specific MYH interaction site 1                                               |
| 102026 | -0.064 | 7474 | 142200  | 0.028  | 7474 | 142200  | 0.028  | 3228 | 142200  | 0.095  | 3228 | 142200  | 0.095  | 5808 | 5177 | 325  | 2883 | FALSE | muscle-specific MYH interaction site 1                                               |
| 102027 | 0.076  | 5144 | 142201  | 0.065  | 5144 | 142201  | 0.065  | 6313 | 142201  | 0.179  | 6313 | 142201  | 0.179  | 3795 | 5178 | 265  | 1046 | FALSE | muscle-specific MYH interaction site 1                                               |
| 102028 | 0.115  | 2070 | 142432  | 0.065  | 2070 | 142432  | 0.065  | 5446 | 101762  | 0.046  | 5446 | 101762  | 0.046  | 3795 | 5179 | 265  | 1046 | FALSE | muscle-specific MYH interaction site 1                                               |
| 102029 | 0.121  | 2931 | 142304  | -0.108 | 2931 | 142304  | -0.108 | 3199 | 99777   | 0.049  | 3199 | 99777   | 0.049  | 6602 | 5180 | 265  | 9782 | FALSE | muscle-specific MYH interaction site 1                                               |
| 102030 | -0.095 | 4793 | 143250  | -0.047 | 4793 | 143250  | -0.047 | 6122 | 5       | 0.047  | 6122 | 5       | 0.047  | 2991 | 5181 | 276  | 6246 | FALSE | muscle-specific MYH interaction site 1                                               |
| 102031 | -0.116 | 3726 | 1451330 | 0.016  | 3726 | 1451330 | 0.016  | 4232 | 7945    | 0.054  | 4232 | 7945    | 0.054  | 6656 | 5182 | 255  | 282  | FALSE | muscle-specific MYH interaction site 1                                               |
| 102032 | -0.221 | 1744 | 145474  | -0.017 | 1744 | 145474  | -0.017 | 2750 | 458474  | 0.138  | 2750 | 458474  | 0.138  | 8206 | 5183 | 375  | 343  | FALSE | muscle-specific MYH interaction site 1                                               |
| 102033 | -0.066 | 4970 | 1448349 | 0.085  | 4970 | 1448349 | 0.085  | 5941 | 5       | 0.024  | 5941 | 5       | 0.024  | 2642 | 5184 | 375  | 1970 | FALSE | muscle-specific MYH interaction site 1                                               |
| 102034 | 0.105  | 3981 | 1418159 | -0.098 | 3981 | 1418159 | -0.098 | 4383 | 5       | 0.056  | 4383 | 5       | 0.056  | 5973 | 5185 | 375  | 2197 | FALSE | muscle-specific MYH interaction site 1                                               |
| 102035 | -0.126 | 7264 | 1415901 | 0.000  | 7264 | 1415901 | 0.000  | 8513 | 99959   | 0.174  | 8513 | 99959   | 0.174  | 7924 | 5186 | 325  | 359  | FALSE | muscle-specific MYH interaction site 1                                               |
| 102036 | 0.015  | 6571 | 1426708 | 0.022  | 6571 | 1426708 | 0.022  | 7650 | 162034  | 0.087  | 7650 | 162034  | 0.087  | 2482 | 5187 | 375  | 231  | FALSE | muscle-specific MYH interaction site 1                                               |
| 102037 | 0.015  | 5023 | 1448163 | -0.097 | 5023 | 1448163 | -0.097 | 5935 | 100948  | 0.077  | 5935 | 100948  | 0.077  | 5808 | 5178 | 265  | 1046 | FALSE | muscle-specific MYH interaction site 1                                               |
| 102038 | -0.009 | 8023 | 1438482 | 0.118  | 8023 | 1438482 | 0.118  | 2876 | 141720  | -0.144 | 2876 | 141720  | -0.144 | 4656 | 5188 | 375  | 1716 | FALSE | muscle-specific MYH interaction site 1                                               |
| 102039 | -0.093 | 4712 | 1429343 | 0.177  | 4712 | 1429343 | 0.177  | 3544 | 9413    | 0.054  | 3544 | 9413    | 0.054  | 6602 | 5189 | 265  | 9782 | FALSE | muscle-specific MYH interaction site 1                                               |
| 102040 | -0.023 | 7221 | 1454713 | 0.097  | 7221 | 1454713 | 0.097  | 3532 | 5       | 0.135  | 3532 | 5       | 0.135  | 7732 | 5190 | 276  | 232  | FALSE | muscle-specific MYH interaction site 1                                               |
| 102041 | -0.049 | 6608 | 1427035 | 0.083  | 6608 | 1427035 | 0.083  | 4641 | 5       | -0.049 | 4641 | 5       | -0.049 | 6733 | 5191 | 625  | 2084 | FALSE | muscle-specific MYH interaction site 1                                               |
| 102042 | -0.193 | 2694 | 1415699 | -0.024 | 2694 | 1415699 | -0.024 | 7647 | 66943   | 0.004  | 7647 | 66943   | 0.004  | 8441 | 5192 | 325  | 325  | FALSE | muscle-specific MYH interaction site 1                                               |
| 102043 | 0.043  | 6459 | 1447966 | 0.116  | 6459 | 1447966 | 0.116  | 3841 | 5       | -0.014 | 3841 | 5       | -0.014 | 3411 | 5193 | 375  | 141  | FALSE | muscle-specific MYH interaction site 1                                               |
| 102044 | 0.075  | 5249 | 1421508 | 0.046  | 5249 | 1421508 | 0.046  | 6522 | 1421508 | 0.056  | 6522 | 1421508 | 0.056  | 6715 | 5194 | 375  | 252  | FALSE | muscle-specific MYH interaction site 1                                               |
| 102045 | 0.074  | 5923 | 1418554 | 0.047  | 5923 | 1418554 | 0.047  | 7935 | 162444  | 0.267  | 7935 | 162444  | 0.267  | 8121 | 5195 | 125  | 281  | FALSE | muscle-specific MYH interaction site 1                                               |
| 102046 | -0.107 | 2449 | 1417000 | 0.043  | 2449 | 1417000 | 0.043  | 6169 | 99951   | 0.055  | 6169 | 99951   | 0.055  | 9017 | 5196 | 225  | 4206 | FALSE | muscle-specific MYH interaction site 1                                               |
| 102047 | 0.043  | 5974 | 1418899 | 0.090  | 5974 | 1418899 | 0.090  | 4440 | 102004  | 0.070  | 4440 | 102004  | 0.070  | 6662 | 5197 | 265  | 1046 | FALSE | muscle-specific MYH interaction site 1                                               |
| 102048 | 0.085  | 1591 | 1425719 | 0.082  | 1591 | 1425719 | 0.082  | 5779 | 9413    | 0.079  | 5779 | 9413    | 0.079  | 6602 | 5198 | 265  | 9782 | FALSE | muscle-specific MYH interaction site 1                                               |
| 102049 | 0.075  | 4760 | 1437138 | 0.104  | 4760 | 1437138 | 0.104  | 3614 | 5       | -0.193 | 3614 | 5       | -0.193 | 4848 | 5199 | 265  | 1046 | FALSE | muscle-specific MYH interaction site 1                                               |
| 102050 | 0.132  | 3560 | 1425754 | 0.039  | 3560 | 1425754 | 0.039  | 7244 | 102008  | 0.030  | 7244 | 102008  | 0.030  | 3071 | 5199 | 276  | 1020 | FALSE | muscle-specific MYH interaction site 1                                               |
| 102051 | 0.045  | 6127 | 1421788 | 0.104  | 6127 | 1421788 | 0.104  | 2940 | 100234  | 0.049  | 2940 | 100234  | 0.049  | 7148 | 5199 | 276  | 1020 | FALSE | muscle-specific MYH interaction site 1                                               |
| 102052 | 0.012  | 8128 | 1417331 | 0.163  | 8128 | 1417331 | 0.163  | 3279 | 101439  | 0.211  | 3279 | 101439  | 0.211  | 7184 | 5199 | 276  | 1020 | FALSE | muscle-specific MYH interaction site 1                                               |
| 102053 | 0.038  | 6286 | 1437489 | 0.066  | 6286 | 1437489 | 0.066  | 5922 | 92574   | 0.142  | 5922 | 92574   | 0.142  | 4290 | 5199 | 276  | 1020 | FALSE | muscle-specific MYH interaction site 1                                               |
| 102054 | 0.066  | 6243 | 1420241 | 0.136  | 6243 | 1420241 | 0.136  | 3246 | 9870    | 0.044  | 3246 | 9870    | 0.044  | 8428 | 5199 | 276  | 1020 | FALSE | muscle-specific MYH interaction site 1                                               |
| 102055 | 0.080  | 5416 | 1417709 | 0.075  | 5416 | 1417709 | 0.075  | 5245 | 160615  | 0.176  | 5245 | 160615  | 0.176  | 7200 | 5199 | 276  | 1020 | FALSE | muscle-specific MYH interaction site 1                                               |
| 102056 | 0.118  | 1824 | 1417506 | 0.095  | 1824 | 1417506 | 0.095  | 3681 | 97973   | 0.003  | 3681 | 97973   | 0.003  | 6626 | 5199 | 276  | 1020 | FALSE | muscle-specific MYH interaction site 1                                               |
| 102057 | 0.009  | 4601 | 1426212 | 0.049  | 4601 | 1426212 | 0.049  | 3176 | 959142  | 0.088  | 3176 | 959142  | 0.088  | 5997 | 5199 | 276  | 1020 | FALSE | muscle-specific MYH interaction site 1                                               |
| 102058 | -0.042 | 7368 | 1423697 | 0.169  | 7368 | 1423697 | 0.169  | 4636 | 1423697 | 0.081  | 4636 | 1423697 | 0.081  | 5233 | 5199 | 276  | 1020 | FALSE | muscle-specific MYH interaction site 1                                               |
| 102059 | -0.040 | 4665 | 1424252 | 0.243  | 4665 | 1424252 | 0.243  | 3285 | 104889  | -0.172 | 3285 | 104889  | -0.172 | 6602 | 5199 | 276  | 1020 | FALSE | muscle-specific MYH interaction site 1                                               |
| 102060 | 0.096  | 2966 | 1424232 | 0.081  | 2966 | 1424232 | 0.081  | 4100 | 100034  | 0.057  | 4100 | 100034  | 0.057  | 5696 | 5199 | 276  | 1020 | FALSE | muscle-specific MYH interaction site 1                                               |
| 102061 | 0.107  | 2427 | 1421564 | -0.021 | 2427 | 1421564 | -0.021 | 7856 | 96597   | 0.032  | 7856 | 96597   | 0.032  | 7529 | 5199 | 276  | 1020 | FALSE | muscle-specific MYH interaction site 1                                               |
| 102062 | 0.048  | 6073 | 1423770 | 0.049  | 6073 | 1423770 | 0.049  | 5825 | 160699  | 0.189  | 5825 | 160699  | 0.189  | 6554 | 5199 | 276  | 1020 | FALSE | muscle-specific MYH interaction site 1                                               |
| 102063 | -0.120 | 3247 | 1417417 | 0.139  | 3247 | 1417417 | 0.139  | 6770 | 996131  | 0.040  | 6770 | 996131  | 0.040  | 7078 | 5199 | 276  | 1020 | FALSE | muscle-specific MYH interaction site 1                                               |
| 102064 | 0.008  | 5416 | 1417709 | 0.075  | 5416 | 1417709 | 0.075  | 5245 | 160615  | 0.176  | 5245 | 160615  | 0.176  | 7200 | 5199 | 276  | 1020 | FALSE | muscle-specific MYH interaction site 1                                               |
| 102065 | -0.041 | 5574 | 1451695 | 0.099  | 5574 | 1451695 | 0.099  | 4645 | 84897   | 0.018  | 4645 | 84897   | 0.018  | 6602 | 5199 | 276  | 1020 | FALSE | muscle-specific MYH interaction site 1                                               |
| 102066 | 0.037  | 4699 | 1432527 | 0.078  | 4699 | 1432527 | 0.078  | 4460 | 103891  | 0.025  | 4460 | 103891  | 0.025  | 2084 | 5199 | 276  | 1020 | FALSE | muscle-specific MYH interaction site 1                                               |
| 102067 | 0.046  | 5650 | 1452714 | -0.192 | 5650 | 1452714 | -0.192 | 3213 | 959142  | 0.069  | 3213 | 959142  | 0.069  | 6359 | 5199 | 276  | 1020 | FALSE | muscle-specific MYH interaction site 1                                               |
| 102068 | -0.041 | 6703 | 1418397 | 0.049  | 6703 | 1418397 | 0.049  | 5202 | 103003  | 0.035  | 5202 | 103003  | 0.035  | 4835 | 5199 | 276  | 1020 | FALSE | muscle-specific MYH interaction site 1                                               |
| 102069 | 0.071  | 2989 | 1419057 | -0.041 | 2989 | 1419057 | -0.041 | 6911 | 9413    | 0.043  | 6911 | 9413    | 0.043  | 4835 | 5199 | 276  | 1020 | FALSE | muscle-specific MYH interaction site 1                                               |
| 102070 | 0.131  | 1793 | 1419665 | 0.104  | 1793 | 1419665 | 0.104  | 4439 | 9413    | 0.039  | 4439 | 9413    | 0.039  | 6635 | 5199 | 276  | 1020 | FALSE | muscle-specific MYH interaction site 1                                               |
| 102071 | -0.184 | 2881 | 1417765 | 0.149  | 2881 | 1417765 | 0.149  | 4413 | 101056  | -0.175 | 4413 | 101056  | -0.175 | 3658 | 5199 | 276  | 1020 | FALSE | muscle-specific MYH interaction site 1                                               |
| 102072 | 0.187  | 2881 | 1450726 | 0.026  | 2881 | 1450726 | 0.026  | 7098 | 9737    | 0.057  | 7098 | 9737    | 0.057  | 4635 | 5199 | 276  | 1020 | FALSE | muscle-specific MYH interaction site 1                                               |
| 102073 | 0.079  | 4511 | 1427061 | 0.035  | 4511 | 1427061 | 0.035  | 7881 | 102003  | 0.028  | 7881 | 102003  | 0.028  | 7438 | 5199 | 276  | 1020 | FALSE | muscle-specific MYH interaction site 1                                               |
| 102074 | 0.049  | 2502 | 1456896 | -0.028 | 2502 | 1456896 | -0.028 | 3319 | 1456896 | 0.039  | 3319 | 1456896 | 0.039  | 7388 | 5199 | 276  | 1020 | FALSE | muscle-specific MYH interaction site 1                                               |
| 102075 | 0.019  | 2881 | 1450726 | 0.026  | 2881 | 1450726 | 0.026  | 4023 | 1420735 | 0.057  |      |         |        |      |      |      |      |       |                                                                                      |







|        |        |       |         |       |      |        |       |      |         |       |      |       |      |      |       |                                    |                         |
|--------|--------|-------|---------|-------|------|--------|-------|------|---------|-------|------|-------|------|------|-------|------------------------------------|-------------------------|
| 100883 | 0.015  | 6270  | 1418350 | 0.112 | 2520 | 100883 | 0.122 | 5236 | 1418250 | 0.111 | 5332 | 15145 | 1810 | 0699 | FALSE | AIP: developmental function factor |                         |
| 947326 | 0.015  | 99625 | 942736  | 0.122 | 4644 | 947326 | 0.122 | 4834 | 1446410 | 0.110 | 4644 | 5354  | 875  | 1660 | 0414  | FALSE                              | non-muscle myosin IIA   |
| 102306 | 0.149  | 7120  | 1426793 | 0.026 | 2022 | 102306 | 0.026 | 2022 | 1448143 | 0.022 | 4068 | 5354  | 376  | 3496 | 0735  | FALSE                              | muscle protein          |
| 923020 | -0.051 | 5413  | 1418192 | 0.062 | 7540 | 923020 | 0.062 | 7540 | 1418192 | 0.117 | 3905 | 5375  | 1036 | 9655 | 0456  | FALSE                              | muscle beta-tropomyosin |
| 100946 | 0.008  | 8521  | 1415294 | 0.024 | 1922 | 100946 | 0.024 | 1922 | 1442816 | 0.033 | 3628 | 5375  | 1104 | 2772 | 0208  | FALSE                              | myosin heavy chain 2    |
| 96558  | 0.046  | 6418  | 1422816 | 0.059 | 7843 | 96558  | 0.059 | 7843 | 909386  | 0.029 | 4033 | 5375  | 1104 | 2772 | 0208  | FALSE                              | myosin heavy chain 2    |
| 980810 | -0.090 | 4062  | 1417260 | 0.020 | 3038 | 980810 | 0.020 | 3038 | 1422816 | 0.071 | 5976 | 5395  | 1103 | 388  | 0018  | FALSE                              | myosin heavy chain 2    |
| 100005 | 0.126  | 3402  | 1466424 | 0.083 | 5246 | 100005 | 0.083 | 5246 | 960810  | 0.035 | 6300 | 5395  | 2197 | 9160 | 0018  | FALSE                              | myosin heavy chain 2    |
| 101206 | -0.020 | 5600  | 1420289 | 0.026 | 6014 | 101206 | 0.026 | 6014 | 1415700 | 0.019 | 3036 | 5384  | 1887 | 2792 | 0018  | FALSE                              | myosin heavy chain 2    |
| 124265 | 0.247  | 1831  | 1424461 | 0.047 | 6458 | 124265 | 0.047 | 6458 | 1424461 | 0.095 | 4831 | 53415 | 2072 | 9444 | 0018  | FALSE                              | myosin heavy chain 2    |
| 96959  | 0.142  | 2453  | 1421649 | 0.102 | 3215 | 96959  | 0.102 | 3215 | 92959   | 0.150 | 2604 | 5395  | 6265 | 2914 | 7183  | FALSE                              | myosin heavy chain 2    |
| 92711  | 0.107  | 2984  | 1427000 | 0.066 | 5326 | 92711  | 0.066 | 5326 | 92713   | 0.078 | 5890 | 5382  | 1275 | 5366 | 0018  | FALSE                              | myosin heavy chain 2    |
| 99346  | 0.101  | 2522  | 1449435 | 0.073 | 4952 | 99346  | 0.073 | 4952 | 1449435 | 0.099 | 5279 | 5384  | 384  | 2031 | 9360  | FALSE                              | myosin heavy chain 2    |
| 96081  | 0.014  | 864   | 1422469 | 0.026 | 6262 | 96081  | 0.026 | 6262 | 96081   | 0.034 | 3465 | 5384  | 384  | 2031 | 9360  | FALSE                              | myosin heavy chain 2    |
| 104626 | 0.049  | 4544  | 1427864 | 0.106 | 2933 | 104626 | 0.106 | 2933 | 1427864 | 0.082 | 4675 | 5384  | 384  | 2031 | 9360  | FALSE                              | myosin heavy chain 2    |
| 93984  | -0.019 | 7403  | 1415650 | 0.045 | 6553 | 93984  | 0.045 | 6553 | 1415650 | 0.064 | 4830 | 5384  | 384  | 2031 | 9360  | FALSE                              | myosin heavy chain 2    |
| 102649 | 0.042  | 5891  | 1422161 | 0.137 | 2529 | 102649 | 0.137 | 2529 | 1422161 | 0.125 | 5492 | 5384  | 384  | 2031 | 9360  | FALSE                              | myosin heavy chain 2    |
| 94326  | 0.094  | 4465  | 1421521 | 0.135 | 2458 | 94326  | 0.135 | 2458 | 1421521 | 0.077 | 4497 | 5384  | 384  | 2031 | 9360  | FALSE                              | myosin heavy chain 2    |
| 102899 | -0.084 | 5288  | 1420302 | 0.047 | 6211 | 102899 | 0.047 | 6211 | 102899  | 0.048 | 4497 | 5384  | 384  | 2031 | 9360  | FALSE                              | myosin heavy chain 2    |
| 92959  | 0.084  | 5288  | 1421362 | 0.102 | 3215 | 92959  | 0.102 | 3215 | 1444048 | 0.048 | 4497 | 5384  | 384  | 2031 | 9360  | FALSE                              | myosin heavy chain 2    |
| 92711  | 0.107  | 2984  | 1427000 | 0.066 | 5326 | 92711  | 0.066 | 5326 | 92713   | 0.078 | 5890 | 5384  | 384  | 2031 | 9360  | FALSE                              | myosin heavy chain 2    |
| 99346  | 0.101  | 2522  | 1449435 | 0.073 | 4952 | 99346  | 0.073 | 4952 | 1449435 | 0.099 | 5279 | 5384  | 384  | 2031 | 9360  | FALSE                              | myosin heavy chain 2    |
| 96081  | 0.014  | 864   | 1422469 | 0.026 | 6262 | 96081  | 0.026 | 6262 | 96081   | 0.034 | 3465 | 5384  | 384  | 2031 | 9360  | FALSE                              | myosin heavy chain 2    |
| 104626 | 0.049  | 4544  | 1427864 | 0.106 | 2933 | 104626 | 0.106 | 2933 | 1427864 | 0.082 | 4675 | 5384  | 384  | 2031 | 9360  | FALSE                              | myosin heavy chain 2    |
| 93984  | -0.019 | 7403  | 1415650 | 0.045 | 6553 | 93984  | 0.045 | 6553 | 1415650 | 0.064 | 4830 | 5384  | 384  | 2031 | 9360  | FALSE                              | myosin heavy chain 2    |
| 102649 | 0.042  | 5891  | 1422161 | 0.137 | 2529 | 102649 | 0.137 | 2529 | 1422161 | 0.125 | 5492 | 5384  | 384  | 2031 | 9360  | FALSE                              | myosin heavy chain 2    |
| 94326  | 0.094  | 4465  | 1421521 | 0.135 | 2458 | 94326  | 0.135 | 2458 | 1421521 | 0.077 | 4497 | 5384  | 384  | 2031 | 9360  | FALSE                              | myosin heavy chain 2    |
| 102899 | -0.084 | 5288  | 1420302 | 0.047 | 6211 | 102899 | 0.047 | 6211 | 102899  | 0.048 | 4497 | 5384  | 384  | 2031 | 9360  | FALSE                              | myosin heavy chain 2    |
| 92959  | 0.084  | 5288  | 1421362 | 0.102 | 3215 | 92959  | 0.102 | 3215 | 1444048 | 0.048 | 4497 | 5384  | 384  | 2031 | 9360  | FALSE                              | myosin heavy chain 2    |
| 92711  | 0.107  | 2984  | 1427000 | 0.066 | 5326 | 92711  | 0.066 | 5326 | 92713   | 0.078 | 5890 | 5384  | 384  | 2031 | 9360  | FALSE                              | myosin heavy chain 2    |
| 99346  | 0.101  | 2522  | 1449435 | 0.073 | 4952 | 99346  | 0.073 | 4952 | 1449435 | 0.099 | 5279 | 5384  | 384  | 2031 | 9360  | FALSE                              | myosin heavy chain 2    |
| 96081  | 0.014  | 864   | 1422469 | 0.026 | 6262 | 96081  | 0.026 | 6262 | 96081   | 0.034 | 3465 | 5384  | 384  | 2031 | 9360  | FALSE                              | myosin heavy chain 2    |
| 104626 | 0.049  | 4544  | 1427864 | 0.106 | 2933 | 104626 | 0.106 | 2933 | 1427864 | 0.082 | 4675 | 5384  | 384  | 2031 | 9360  | FALSE                              | myosin heavy chain 2    |
| 93984  | -0.019 | 7403  | 1415650 | 0.045 | 6553 | 93984  | 0.045 | 6553 | 1415650 | 0.064 | 4830 | 5384  | 384  | 2031 | 9360  | FALSE                              | myosin heavy chain 2    |
| 102649 | 0.042  | 5891  | 1422161 | 0.137 | 2529 | 102649 | 0.137 | 2529 | 1422161 | 0.125 | 5492 | 5384  | 384  | 2031 | 9360  | FALSE                              | myosin heavy chain 2    |
| 94326  | 0.094  | 4465  | 1421521 | 0.135 | 2458 | 94326  | 0.135 | 2458 | 1421521 | 0.077 | 4497 | 5384  | 384  | 2031 | 9360  | FALSE                              | myosin heavy chain 2    |
| 102899 | -0.084 | 5288  | 1420302 | 0.047 | 6211 | 102899 | 0.047 | 6211 | 102899  | 0.048 | 4497 | 5384  | 384  | 2031 | 9360  | FALSE                              | myosin heavy chain 2    |
| 92959  | 0.084  | 5288  | 1421362 | 0.102 | 3215 | 92959  | 0.102 | 3215 | 1444048 | 0.048 | 4497 | 5384  | 384  | 2031 | 9360  | FALSE                              | myosin heavy chain 2    |
| 92711  | 0.107  | 2984  | 1427000 | 0.066 | 5326 | 92711  | 0.066 | 5326 | 92713   | 0.078 | 5890 | 5384  | 384  | 2031 | 9360  | FALSE                              | myosin heavy chain 2    |
| 99346  | 0.101  | 2522  | 1449435 | 0.073 | 4952 | 99346  | 0.073 | 4952 | 1449435 | 0.099 | 5279 | 5384  | 384  | 2031 | 9360  | FALSE                              | myosin heavy chain 2    |
| 96081  | 0.014  | 864   | 1422469 | 0.026 | 6262 | 96081  | 0.026 | 6262 | 96081   | 0.034 | 3465 | 5384  | 384  | 2031 | 9360  | FALSE                              | myosin heavy chain 2    |
| 104626 | 0.049  | 4544  | 1427864 | 0.106 | 2933 | 104626 | 0.106 | 2933 | 1427864 | 0.082 | 4675 | 5384  | 384  | 2031 | 9360  | FALSE                              | myosin heavy chain 2    |
| 93984  | -0.019 | 7403  | 1415650 | 0.045 | 6553 | 93984  | 0.045 | 6553 | 1415650 | 0.064 | 4830 | 5384  | 384  | 2031 | 9360  | FALSE                              | myosin heavy chain 2    |
| 102649 | 0.042  | 5891  | 1422161 | 0.137 | 2529 | 102649 | 0.137 | 2529 | 1422161 | 0.125 | 5492 | 5384  | 384  | 2031 | 9360  | FALSE                              | myosin heavy chain 2    |
| 94326  | 0.094  | 4465  | 1421521 | 0.135 | 2458 | 94326  | 0.135 | 2458 | 1421521 | 0.077 | 4497 | 5384  | 384  | 2031 | 9360  | FALSE                              | myosin heavy chain 2    |
| 102899 | -0.084 | 5288  | 1420302 | 0.047 | 6211 | 102899 | 0.047 | 6211 | 102899  | 0.048 | 4497 | 5384  | 384  | 2031 | 9360  | FALSE                              | myosin heavy chain 2    |
| 92959  | 0.084  | 5288  | 1421362 | 0.102 | 3215 | 92959  | 0.102 | 3215 | 1444048 | 0.048 | 4497 | 5384  | 384  | 2031 | 9360  | FALSE                              | myosin heavy chain 2    |
| 92711  | 0.107  | 2984  | 1427000 | 0.066 | 5326 | 92711  | 0.066 | 5326 | 92713   | 0.078 | 5890 | 5384  | 384  | 2031 | 9360  | FALSE                              | myosin heavy chain 2    |
| 99346  | 0.101  | 2522  | 1449435 | 0.073 | 4952 | 99346  | 0.073 | 4952 | 1449435 | 0.099 | 5279 | 5384  | 384  | 2031 | 9360  | FALSE                              | myosin heavy chain 2    |
| 96081  | 0.014  | 864   | 1422469 | 0.026 | 6262 | 96081  | 0.026 | 6262 | 96081   | 0.034 | 3465 | 5384  | 384  | 2031 | 9360  | FALSE                              | myosin heavy chain 2    |
| 104626 | 0.049  | 4544  | 1427864 | 0.106 | 2933 | 104626 | 0.106 | 2933 | 1427864 | 0.082 | 4675 | 5384  | 384  | 2031 | 9360  | FALSE                              | myosin heavy chain 2    |
| 93984  | -0.019 | 7403  | 1415650 | 0.045 | 6553 | 93984  | 0.045 | 6553 | 1415650 | 0.064 | 4830 | 5384  | 384  | 2031 | 9360  | FALSE                              | myosin heavy chain 2    |
| 102649 | 0.042  | 5891  | 1422161 | 0.137 | 2529 | 102649 | 0.137 | 2529 | 1422161 | 0.125 | 5492 | 5384  | 384  | 2031 | 9360  | FALSE                              | myosin heavy chain 2    |
| 94326  | 0.094  | 4465  | 1421521 | 0.135 | 2458 | 94326  | 0.135 | 2458 | 1421521 | 0.077 | 4497 | 5384  | 384  | 2031 | 9360  | FALSE                              | myosin heavy chain 2    |
| 102899 | -0.084 | 5288  | 1420302 | 0.047 | 6211 | 102899 | 0.047 | 6211 | 102899  | 0.048 | 4497 | 5384  | 384  | 2031 | 9360  | FALSE                              | myosin heavy chain 2    |
| 92959  | 0.084  | 5288  | 1421362 | 0.102 | 3215 | 92959  | 0.102 | 3215 | 1444048 | 0.048 | 4497 | 5384  | 384  | 2031 | 9360  | FALSE                              | myosin heavy chain 2    |
| 92711  | 0.107  | 2984  | 1427000 | 0.066 | 5326 | 92711  | 0.066 | 5326 | 92713   | 0.078 | 5890 | 5384  | 384  | 2031 | 9360  | FALSE                              | myosin heavy chain 2    |
| 99346  | 0.101  | 2522  | 1449435 | 0.073 | 4952 | 99346  | 0.073 | 4952 | 1449435 | 0.099 | 5279 | 5384  | 384  | 2031 | 9360  | FALSE                              | myosin heavy chain 2    |
| 96081  | 0.014  | 864   | 1422469 | 0.026 | 6262 | 96081  | 0.026 | 6262 | 96081   | 0.034 | 3465 | 5384  | 384  | 2031 | 9360  | FALSE                              | myosin heavy chain 2    |
| 104626 | 0.049  | 4544  | 1427864 | 0.106 | 2933 | 104626 | 0.106 | 2933 | 1427864 | 0.082 | 4675 | 5384  | 384  | 2031 | 9360  | FALSE                              | myosin heavy chain 2    |
| 93984  | -0.019 | 7403  | 1415650 | 0.045 | 6553 | 93984  | 0.045 | 6553 | 1415650 | 0.064 | 4830 | 5384  | 384  | 2031 | 9360  | FALSE                              | myosin heavy chain 2    |
| 102649 | 0.042  | 5891  | 1422161 | 0.137 | 2529 | 102649 | 0.137 | 2529 | 1422161 | 0.125 | 5492 | 5384  | 384  | 2031 | 9360  | FALSE                              | myosin heavy chain 2    |
| 94326  | 0.094  | 4465  | 1421521 | 0.135 | 2458 | 94326  | 0.135 | 2458 | 1421521 | 0.077 | 4497 | 5384  | 384  | 2031 | 9360  | FALSE                              | myosin heavy chain 2    |
| 102899 | -0.084 | 5288  | 1420302 | 0.047 | 6211 | 102899 | 0.047 | 6211 | 102899  | 0.048 | 4497 | 5384  | 384  | 2031 | 9360  | FALSE                              | myosin heavy chain 2    |
| 92959  | 0.084  | 5288  | 1421362 | 0.102 | 3215 | 92959  | 0.102 | 3215 | 1444048 | 0.048 | 4497 | 5384  | 384  | 2031 | 9360  | FALSE                              | myosin heavy chain 2    |
| 92711  | 0.107  | 2984  | 1427000 | 0.066 | 5326 | 92711  | 0.066 | 5326 | 92713   | 0.078 | 5890 | 5384  | 384  | 2031 | 9360  | FALSE                              | myosin heavy chain 2    |
| 99346  | 0.101  | 2522  | 1449435 | 0.073 | 4952 | 99346  | 0.073 | 4952 | 1449435 | 0.099 | 5279 | 5384  | 384  | 2031 | 9360  | FALSE                              | myosin heavy chain 2    |
| 96081  | 0.014  | 864   | 1422469 | 0.026 | 6262 | 96081  | 0.026 | 6262 | 96081   | 0.034 | 3465 | 5384  | 384  | 2031 | 9360  | FALSE                              | myosin heavy chain 2    |
| 104626 | 0.049  | 4544  | 1427864 | 0.106 | 2933 | 104626 | 0.106 | 2933 | 1427864 | 0.082 | 4675 | 5384  | 384  | 2031 | 9360  | FALSE                              | myosin heavy chain 2    |
| 93984  | -0.019 | 7403  | 1415650 | 0.045 |      |        |       |      |         |       |      |       |      |      |       |                                    |                         |



|        |       |      |         |      |        |        |      |         |        |      |         |      |        |        |      |      |      |       |                                                       |
|--------|-------|------|---------|------|--------|--------|------|---------|--------|------|---------|------|--------|--------|------|------|------|-------|-------------------------------------------------------|
| 109068 | 0.019 | 7448 | 1434723 | 5.91 | 109068 | -0.056 | 5971 | 109068  | -0.110 | 2121 | 1431273 | 5.91 | 109068 | -0.060 | 6489 | 1235 | 9654 | FALSE | chromatin-remodeling factor 3 (chromatin remodeler 3) |
| 109069 | 0.016 | 6443 | 1416255 | 5.90 | 109069 | -0.052 | 5620 | 109069  | -0.157 | 1456 | 14764   | 5.90 | 109069 | -0.157 | 3188 | 5602 | 25   | FALSE | serine/threonine kinase 1                             |
| 94340  | 0.015 | 5987 | 1419720 | 6.01 | 94340  | 0.041  | 6607 | 92470   | 0.041  | 4400 | 1417628 | 6.01 | 94340  | -0.054 | 7007 | 5002 | 25   | FALSE | DNA methyltransferase 2                               |
| 94341  | 0.015 | 7767 | 1421888 | 6.01 | 94341  | 0.111  | 3640 | 1421888 | 0.111  | 3500 | 1421888 | 6.01 | 94341  | -0.186 | 4215 | 5601 | 125  | FALSE | phenolamides C-C methyl transferase 1                 |
| 101586 | 0.015 | 5218 | 1455234 | 6.01 | 101586 | 0.028  | 8015 | 1455234 | 0.028  | 5103 | 1454292 | 6.01 | 101586 | 0.172  | 3072 | 5601 | 125  | FALSE | serine/threonine kinase 1                             |
| 97965  | 0.015 | 6889 | 1422417 | 6.01 | 97965  | -0.068 | 5121 | 1422417 | -0.068 | 3087 | 1412729 | 6.01 | 97965  | -0.090 | 6919 | 5601 | 125  | FALSE | serine/threonine kinase 2                             |
| 100292 | 0.012 | 4664 | 1449705 | 6.01 | 100292 | 0.102  | 3644 | 1449705 | 0.102  | 3580 | 1420442 | 6.01 | 100292 | -0.040 | 5820 | 5601 | 125  | FALSE | serine/threonine kinase 2                             |
| 101186 | 0.012 | 4664 | 1449705 | 6.01 | 101186 | 0.102  | 3644 | 1449705 | 0.102  | 3580 | 1420442 | 6.01 | 101186 | -0.040 | 5820 | 5601 | 125  | FALSE | SCH domain protein 2A (serine/threonine kinase)       |
| 99880  | 0.012 | 6251 | 1456056 | 6.01 | 99880  | 0.047  | 6251 | 1456056 | 0.047  | 6251 | 1456056 | 6.01 | 99880  | 0.190  | 1977 | 5601 | 125  | FALSE | DNA methyltransferase 1                               |
| 101856 | 0.011 | 7857 | 1450581 | 6.01 | 101856 | -0.101 | 4273 | 1450581 | -0.101 | 4066 | 1450581 | 6.01 | 101856 | 0.077  | 5687 | 5601 | 125  | FALSE | DNA methyltransferase 1                               |
| 98853  | 0.011 | 4273 | 1450581 | 6.01 | 98853  | -0.009 | 4273 | 1450581 | -0.009 | 4273 | 1450581 | 6.01 | 98853  | -0.034 | 7890 | 5601 | 125  | FALSE | serine/threonine kinase 2                             |
| 96929  | 0.011 | 6840 | 1419333 | 6.01 | 96929  | 0.129  | 6840 | 1419333 | 0.129  | 6840 | 1419333 | 6.01 | 96929  | 0.089  | 6477 | 5601 | 125  | FALSE | serine/threonine kinase 2                             |
| 92239  | 0.011 | 6251 | 1456056 | 6.01 | 92239  | 0.081  | 6251 | 1456056 | 0.081  | 6251 | 1456056 | 6.01 | 92239  | 0.187  | 3488 | 5601 | 125  | FALSE | ELM1 (serine/threonine kinase)                        |
| 90079  | 0.011 | 6251 | 1456056 | 6.01 | 90079  | 0.081  | 6251 | 1456056 | 0.081  | 6251 | 1456056 | 6.01 | 90079  | 0.187  | 3488 | 5601 | 125  | FALSE | ELM1 (serine/threonine kinase)                        |
| 94900  | 0.011 | 5651 | 1438290 | 6.01 | 94900  | -0.053 | 5651 | 1438290 | -0.053 | 5651 | 1438290 | 6.01 | 94900  | -0.030 | 4136 | 5601 | 125  | FALSE | serine/threonine kinase 2                             |
| 102629 | 0.011 | 5651 | 1438290 | 6.01 | 102629 | -0.053 | 5651 | 1438290 | -0.053 | 5651 | 1438290 | 6.01 | 102629 | -0.030 | 4136 | 5601 | 125  | FALSE | serine/threonine kinase 2                             |
| 102630 | 0.011 | 5651 | 1438290 | 6.01 | 102630 | -0.053 | 5651 | 1438290 | -0.053 | 5651 | 1438290 | 6.01 | 102630 | -0.030 | 4136 | 5601 | 125  | FALSE | serine/threonine kinase 2                             |
| 96660  | 0.011 | 5725 | 1428868 | 6.01 | 96660  | -0.087 | 5725 | 1428868 | -0.087 | 5725 | 1428868 | 6.01 | 96660  | -0.092 | 4740 | 5601 | 125  | FALSE | serine/threonine kinase 2                             |
| 91298  | 0.011 | 6091 | 1415890 | 6.01 | 91298  | -0.146 | 6091 | 1415890 | -0.146 | 6091 | 1415890 | 6.01 | 91298  | -0.104 | 8128 | 5601 | 125  | FALSE | serine/threonine kinase 2                             |
| 96316  | 0.011 | 1198 | 1449516 | 6.01 | 96316  | 0.173  | 1198 | 1449516 | 0.173  | 1198 | 1449516 | 6.01 | 96316  | -0.026 | 7809 | 5601 | 125  | FALSE | serine/threonine kinase 2                             |
| 100292 | 0.011 | 3644 | 1449705 | 6.01 | 100292 | 0.102  | 3644 | 1449705 | 0.102  | 3580 | 1420442 | 6.01 | 100292 | -0.040 | 5820 | 5601 | 125  | FALSE | SCH domain protein 2A (serine/threonine kinase)       |
| 95139  | 0.011 | 6650 | 1446629 | 6.01 | 95139  | 0.139  | 6650 | 1446629 | 0.139  | 6650 | 1446629 | 6.01 | 95139  | -0.024 | 7413 | 5601 | 125  | FALSE | DNA methyltransferase 1                               |
| 94537  | 0.011 | 7700 | 1428868 | 6.01 | 94537  | 0.083  | 7700 | 1428868 | 0.083  | 7700 | 1428868 | 6.01 | 94537  | 0.041  | 7193 | 5601 | 125  | FALSE | serine/threonine kinase 2                             |
| 99382  | 0.011 | 7485 | 1421939 | 6.01 | 99382  | 0.021  | 7485 | 1421939 | 0.021  | 7485 | 1421939 | 6.01 | 99382  | 0.139  | 5417 | 5601 | 125  | FALSE | DNA methyltransferase 1                               |
| 96192  | 0.011 | 6251 | 1456056 | 6.01 | 96192  | -0.053 | 6251 | 1456056 | -0.053 | 6251 | 1456056 | 6.01 | 96192  | -0.140 | 5102 | 5601 | 125  | FALSE | serine/threonine kinase 2                             |
| 92339  | 0.011 | 4399 | 1419702 | 6.01 | 92339  | 0.084  | 4399 | 1419702 | 0.084  | 4399 | 1419702 | 6.01 | 92339  | 0.108  | 6089 | 5601 | 125  | FALSE | serine/threonine kinase 2                             |
| 99884  | 0.011 | 5651 | 1438290 | 6.01 | 99884  | -0.053 | 5651 | 1438290 | -0.053 | 5651 | 1438290 | 6.01 | 99884  | -0.030 | 4136 | 5601 | 125  | FALSE | serine/threonine kinase 2                             |
| 99885  | 0.011 | 5651 | 1438290 | 6.01 | 99885  | -0.053 | 5651 | 1438290 | -0.053 | 5651 | 1438290 | 6.01 | 99885  | -0.030 | 4136 | 5601 | 125  | FALSE | serine/threonine kinase 2                             |
| 102629 | 0.011 | 5651 | 1438290 | 6.01 | 102629 | -0.053 | 5651 | 1438290 | -0.053 | 5651 | 1438290 | 6.01 | 102629 | -0.030 | 4136 | 5601 | 125  | FALSE | serine/threonine kinase 2                             |
| 102630 | 0.011 | 5651 | 1438290 | 6.01 | 102630 | -0.053 | 5651 | 1438290 | -0.053 | 5651 | 1438290 | 6.01 | 102630 | -0.030 | 4136 | 5601 | 125  | FALSE | serine/threonine kinase 2                             |
| 96660  | 0.011 | 5725 | 1428868 | 6.01 | 96660  | -0.087 | 5725 | 1428868 | -0.087 | 5725 | 1428868 | 6.01 | 96660  | -0.092 | 4740 | 5601 | 125  | FALSE | serine/threonine kinase 2                             |
| 91298  | 0.011 | 6091 | 1415890 | 6.01 | 91298  | -0.146 | 6091 | 1415890 | -0.146 | 6091 | 1415890 | 6.01 | 91298  | -0.104 | 8128 | 5601 | 125  | FALSE | serine/threonine kinase 2                             |
| 96316  | 0.011 | 1198 | 1449516 | 6.01 | 96316  | 0.173  | 1198 | 1449516 | 0.173  | 1198 | 1449516 | 6.01 | 96316  | -0.026 | 7809 | 5601 | 125  | FALSE | serine/threonine kinase 2                             |
| 100292 | 0.011 | 3644 | 1449705 | 6.01 | 100292 | 0.102  | 3644 | 1449705 | 0.102  | 3580 | 1420442 | 6.01 | 100292 | -0.040 | 5820 | 5601 | 125  | FALSE | SCH domain protein 2A (serine/threonine kinase)       |
| 95139  | 0.011 | 6650 | 1446629 | 6.01 | 95139  | 0.139  | 6650 | 1446629 | 0.139  | 6650 | 1446629 | 6.01 | 95139  | -0.024 | 7413 | 5601 | 125  | FALSE | DNA methyltransferase 1                               |
| 94537  | 0.011 | 7700 | 1428868 | 6.01 | 94537  | 0.083  | 7700 | 1428868 | 0.083  | 7700 | 1428868 | 6.01 | 94537  | 0.041  | 7193 | 5601 | 125  | FALSE | serine/threonine kinase 2                             |
| 99382  | 0.011 | 7485 | 1421939 | 6.01 | 99382  | 0.021  | 7485 | 1421939 | 0.021  | 7485 | 1421939 | 6.01 | 99382  | 0.139  | 5417 | 5601 | 125  | FALSE | DNA methyltransferase 1                               |
| 96192  | 0.011 | 6251 | 1456056 | 6.01 | 96192  | -0.053 | 6251 | 1456056 | -0.053 | 6251 | 1456056 | 6.01 | 96192  | -0.140 | 5102 | 5601 | 125  | FALSE | serine/threonine kinase 2                             |
| 92339  | 0.011 | 4399 | 1419702 | 6.01 | 92339  | 0.084  | 4399 | 1419702 | 0.084  | 4399 | 1419702 | 6.01 | 92339  | 0.108  | 6089 | 5601 | 125  | FALSE | serine/threonine kinase 2                             |
| 99884  | 0.011 | 5651 | 1438290 | 6.01 | 99884  | -0.053 | 5651 | 1438290 | -0.053 | 5651 | 1438290 | 6.01 | 99884  | -0.030 | 4136 | 5601 | 125  | FALSE | serine/threonine kinase 2                             |
| 99885  | 0.011 | 5651 | 1438290 | 6.01 | 99885  | -0.053 | 5651 | 1438290 | -0.053 | 5651 | 1438290 | 6.01 | 99885  | -0.030 | 4136 | 5601 | 125  | FALSE | serine/threonine kinase 2                             |
| 102629 | 0.011 | 5651 | 1438290 | 6.01 | 102629 | -0.053 | 5651 | 1438290 | -0.053 | 5651 | 1438290 | 6.01 | 102629 | -0.030 | 4136 | 5601 | 125  | FALSE | serine/threonine kinase 2                             |
| 102630 | 0.011 | 5651 | 1438290 | 6.01 | 102630 | -0.053 | 5651 | 1438290 | -0.053 | 5651 | 1438290 | 6.01 | 102630 | -0.030 | 4136 | 5601 | 125  | FALSE | serine/threonine kinase 2                             |
| 96660  | 0.011 | 5725 | 1428868 | 6.01 | 96660  | -0.087 | 5725 | 1428868 | -0.087 | 5725 | 1428868 | 6.01 | 96660  | -0.092 | 4740 | 5601 | 125  | FALSE | serine/threonine kinase 2                             |
| 91298  | 0.011 | 6091 | 1415890 | 6.01 | 91298  | -0.146 | 6091 | 1415890 | -0.146 | 6091 | 1415890 | 6.01 | 91298  | -0.104 | 8128 | 5601 | 125  | FALSE | serine/threonine kinase 2                             |
| 96316  | 0.011 | 1198 | 1449516 | 6.01 | 96316  | 0.173  | 1198 | 1449516 | 0.173  | 1198 | 1449516 | 6.01 | 96316  | -0.026 | 7809 | 5601 | 125  | FALSE | serine/threonine kinase 2                             |
| 100292 | 0.011 | 3644 | 1449705 | 6.01 | 100292 | 0.102  | 3644 | 1449705 | 0.102  | 3580 | 1420442 | 6.01 | 100292 | -0.040 | 5820 | 5601 | 125  | FALSE | SCH domain protein 2A (serine/threonine kinase)       |
| 95139  | 0.011 | 6650 | 1446629 | 6.01 | 95139  | 0.139  | 6650 | 1446629 | 0.139  | 6650 | 1446629 | 6.01 | 95139  | -0.024 | 7413 | 5601 | 125  | FALSE | DNA methyltransferase 1                               |
| 94537  | 0.011 | 7700 | 1428868 | 6.01 | 94537  | 0.083  | 7700 | 1428868 | 0.083  | 7700 | 1428868 | 6.01 | 94537  | 0.041  | 7193 | 5601 | 125  | FALSE | serine/threonine kinase 2                             |
| 99382  | 0.011 | 7485 | 1421939 | 6.01 | 99382  | 0.021  | 7485 | 1421939 | 0.021  | 7485 | 1421939 | 6.01 | 99382  | 0.139  | 5417 | 5601 | 125  | FALSE | DNA methyltransferase 1                               |
| 96192  | 0.011 | 6251 | 1456056 | 6.01 | 96192  | -0.053 | 6251 | 1456056 | -0.053 | 6251 | 1456056 | 6.01 | 96192  | -0.140 | 5102 | 5601 | 125  | FALSE | serine/threonine kinase 2                             |
| 92339  | 0.011 | 4399 | 1419702 | 6.01 | 92339  | 0.084  | 4399 | 1419702 | 0.084  | 4399 | 1419702 | 6.01 | 92339  | 0.108  | 6089 | 5601 | 125  | FALSE | serine/threonine kinase 2                             |
| 99884  | 0.011 | 5651 | 1438290 | 6.01 | 99884  | -0.053 | 5651 | 1438290 | -0.053 | 5651 | 1438290 | 6.01 | 99884  | -0.030 | 4136 | 5601 | 125  | FALSE | serine/threonine kinase 2                             |
| 99885  | 0.011 | 5651 | 1438290 | 6.01 | 99885  | -0.053 | 5651 | 1438290 | -0.053 | 5651 | 1438290 | 6.01 | 99885  | -0.030 | 4136 | 5601 | 125  | FALSE | serine/threonine kinase 2                             |
| 102629 | 0.011 | 5651 | 1438290 | 6.01 | 102629 | -0.053 | 5651 | 1438290 | -0.053 | 5651 | 1438290 | 6.01 | 102629 | -0.030 | 4136 | 5601 | 125  | FALSE | serine/threonine kinase 2                             |
| 102630 | 0.011 | 5651 | 1438290 | 6.01 | 102630 | -0.053 | 5651 | 1438290 | -0.053 | 5651 | 1438290 | 6.01 | 102630 | -0.030 | 4136 | 5601 | 125  | FALSE | serine/threonine kinase 2                             |
| 96660  | 0.011 | 5725 | 1428868 | 6.01 | 96660  | -0.087 | 5725 | 1428868 | -0.087 | 5725 | 1428868 | 6.01 | 96660  | -0.092 | 4740 | 5601 | 125  | FALSE | serine/threonine kinase 2                             |
| 91298  | 0.011 | 6091 | 1415890 | 6.01 | 91298  | -0.146 | 6091 | 1415890 | -0.146 | 6091 | 1415890 | 6.01 | 91298  | -0.104 | 8128 | 5601 | 125  | FALSE | serine/threonine kinase 2                             |
| 96316  | 0.011 | 1198 | 1449516 | 6.01 | 96316  | 0.173  | 1198 | 1449516 | 0.173  | 1198 | 1449516 | 6.01 | 96316  | -0.026 | 7809 | 5601 | 125  | FALSE | serine/threonine kinase 2                             |
| 100292 | 0.011 | 3644 | 1449705 | 6.01 | 100292 | 0.102  | 3644 | 1449705 | 0.102  | 3580 | 1420442 | 6.01 | 100292 | -0.040 | 5820 | 5601 | 125  | FALSE | SCH domain protein 2A (serine/threonine kinase)       |
| 95139  | 0.011 | 6650 | 1446629 | 6.01 | 95139  | 0.139  | 6650 | 1446629 | 0.139  | 6650 | 1446629 | 6.01 | 95139  | -0.024 | 7413 | 5601 | 125  | FALSE | DNA methyltransferase 1                               |
| 94537  | 0.01  |      |         |      |        |        |      |         |        |      |         |      |        |        |      |      |      |       |                                                       |











|        |       |      |         |       |      |         |       |      |         |       |      |      |     |      |      |       |                                  |
|--------|-------|------|---------|-------|------|---------|-------|------|---------|-------|------|------|-----|------|------|-------|----------------------------------|
| 101889 | 0.090 | 1756 | 1418848 | 0.082 | 5471 | 101159  | 0.040 | 6199 | 1411888 | 0.031 | 7853 | 5926 | 876 | 1714 | 1917 | FALSE | transmembrane 7                  |
| 102908 | 0.046 | 6648 | 1417388 | 0.056 | 6648 | 1417388 | 0.056 | 6240 | 142055  | 0.038 | 6030 | 5896 | 626 | 2246 | 9142 | FALSE | procollagen type IV, alpha 2     |
| 101039 | 0.022 | 7295 | 1424051 | 0.049 | 4410 | 107030  | 0.041 | 6240 | 1424051 | 0.029 | 6430 | 5896 | 626 | 2246 | 9142 | FALSE | collagen type IV, alpha 2        |
| 96268  | 0.038 | 6463 | 1422844 | 0.041 | 6463 | 1422844 | 0.041 | 6240 | 1422844 | 0.035 | 6430 | 5896 | 626 | 2246 | 9142 | TRUE  | collagen type IV, alpha 2        |
| 102725 | 0.006 | 6348 | 1418156 | 0.012 | 6348 | 1418156 | 0.012 | 6240 | 1418156 | 0.015 | 6430 | 5896 | 626 | 2246 | 9142 | FALSE | collagen type IV, alpha 2        |
| 102756 | 0.006 | 6348 | 1418156 | 0.012 | 6348 | 1418156 | 0.012 | 6240 | 1418156 | 0.015 | 6430 | 5896 | 626 | 2246 | 9142 | FALSE | collagen type IV, alpha 2        |
| 94976  | 0.018 | 7188 | 1423974 | 0.010 | 7188 | 1423974 | 0.010 | 6240 | 1423974 | 0.017 | 6430 | 5896 | 626 | 2246 | 9142 | FALSE | nuclear mitotic arrest protein 1 |
| 104006 | 0.014 | 7224 | 1420716 | 0.014 | 7224 | 1420716 | 0.014 | 6240 | 1420716 | 0.017 | 6430 | 5896 | 626 | 2246 | 9142 | FALSE | nuclear mitotic arrest protein 1 |
| 101899 | 0.014 | 7224 | 1420716 | 0.014 | 7224 | 1420716 | 0.014 | 6240 | 1420716 | 0.017 | 6430 | 5896 | 626 | 2246 | 9142 | FALSE | nuclear mitotic arrest protein 1 |
| 99028  | 0.003 | 4465 | 1448351 | 0.001 | 4465 | 1448351 | 0.001 | 6240 | 1448351 | 0.004 | 6430 | 5896 | 626 | 2246 | 9142 | FALSE | collagen type IV, alpha 2        |
| 104208 | 0.000 | 8415 | 1419728 | 0.000 | 8415 | 1419728 | 0.000 | 6240 | 1419728 | 0.004 | 6430 | 5896 | 626 | 2246 | 9142 | FALSE | collagen type IV, alpha 2        |
| 104974 | 0.002 | 6881 | 1434239 | 0.008 | 6881 | 1434239 | 0.008 | 6240 | 1434239 | 0.005 | 6430 | 5896 | 626 | 2246 | 9142 | FALSE | collagen type IV, alpha 2        |
| 94999  | 0.028 | 7125 | 1403720 | 0.023 | 7125 | 1403720 | 0.023 | 6240 | 1403720 | 0.023 | 6430 | 5896 | 626 | 2246 | 9142 | FALSE | collagen type IV, alpha 2        |
| 101356 | 0.006 | 8245 | 1426700 | 0.006 | 8245 | 1426700 | 0.006 | 6240 | 1426700 | 0.005 | 6430 | 5896 | 626 | 2246 | 9142 | FALSE | collagen type IV, alpha 2        |
| 103394 | 0.000 | 8592 | 1450704 | 0.000 | 8592 | 1450704 | 0.000 | 6240 | 1450704 | 0.004 | 6430 | 5896 | 626 | 2246 | 9142 | FALSE | collagen type IV, alpha 2        |
| 103083 | 0.027 | 6816 | 1422820 | 0.024 | 6816 | 1422820 | 0.024 | 6240 | 1422820 | 0.024 | 6430 | 5896 | 626 | 2246 | 9142 | FALSE | collagen type IV, alpha 2        |
| 98328  | 0.000 | 7408 | 1417526 | 0.000 | 7408 | 1417526 | 0.000 | 6240 | 1417526 | 0.002 | 6430 | 5896 | 626 | 2246 | 9142 | FALSE | collagen type IV, alpha 2        |
| 96862  | 0.030 | 5480 | 1450800 | 0.016 | 5480 | 1450800 | 0.016 | 6240 | 1450800 | 0.016 | 6430 | 5896 | 626 | 2246 | 9142 | FALSE | collagen type IV, alpha 2        |
| 94665  | 0.039 | 5744 | 1456506 | 0.004 | 5744 | 1456506 | 0.004 | 6240 | 1456506 | 0.005 | 6430 | 5896 | 626 | 2246 | 9142 | FALSE | collagen type IV, alpha 2        |
| 104162 | 0.016 | 6270 | 1418305 | 0.001 | 6270 | 1418305 | 0.001 | 6240 | 1418305 | 0.001 | 6430 | 5896 | 626 | 2246 | 9142 | FALSE | collagen type IV, alpha 2        |
| 98281  | 0.016 | 5676 | 1462418 | 0.016 | 5676 | 1462418 | 0.016 | 6240 | 1462418 | 0.016 | 6430 | 5896 | 626 | 2246 | 9142 | FALSE | collagen type IV, alpha 2        |
| 104368 | 0.046 | 6620 | 1434729 | 0.042 | 6620 | 1434729 | 0.042 | 6240 | 1434729 | 0.042 | 6430 | 5896 | 626 | 2246 | 9142 | FALSE | collagen type IV, alpha 2        |
| 94782  | 0.014 | 7892 | 1449856 | 0.014 | 7892 | 1449856 | 0.014 | 6240 | 1449856 | 0.015 | 6430 | 5896 | 626 | 2246 | 9142 | FALSE | collagen type IV, alpha 2        |
| 93255  | 0.020 | 7469 | 1448834 | 0.025 | 7469 | 1448834 | 0.025 | 6240 | 1448834 | 0.025 | 6430 | 5896 | 626 | 2246 | 9142 | FALSE | collagen type IV, alpha 2        |
| 94448  | 0.011 | 8209 | 1433923 | 0.011 | 8209 | 1433923 | 0.011 | 6240 | 1433923 | 0.011 | 6430 | 5896 | 626 | 2246 | 9142 | FALSE | collagen type IV, alpha 2        |
| 101705 | 0.073 | 5331 | 1435273 | 0.007 | 5331 | 1435273 | 0.007 | 6240 | 1435273 | 0.007 | 6430 | 5896 | 626 | 2246 | 9142 | FALSE | collagen type IV, alpha 2        |
| 93526  | 0.073 | 5272 | 1416583 | 0.167 | 5272 | 1416583 | 0.167 | 6240 | 1416583 | 0.167 | 6430 | 5896 | 626 | 2246 | 9142 | FALSE | collagen type IV, alpha 2        |
| 103899 | 0.003 | 6628 | 1416428 | 0.003 | 6628 | 1416428 | 0.003 | 6240 | 1416428 | 0.003 | 6430 | 5896 | 626 | 2246 | 9142 | FALSE | collagen type IV, alpha 2        |
| 95189  | 0.041 | 6282 | 1451392 | 0.041 | 6282 | 1451392 | 0.041 | 6240 | 1451392 | 0.041 | 6430 | 5896 | 626 | 2246 | 9142 | FALSE | collagen type IV, alpha 2        |
| 98910  | 0.003 | 8395 | 1420701 | 0.003 | 8395 | 1420701 | 0.003 | 6240 | 1420701 | 0.003 | 6430 | 5896 | 626 | 2246 | 9142 | FALSE | collagen type IV, alpha 2        |
| 94064  | 0.003 | 6489 | 1440564 | 0.009 | 6489 | 1440564 | 0.009 | 6240 | 1440564 | 0.009 | 6430 | 5896 | 626 | 2246 | 9142 | FALSE | collagen type IV, alpha 2        |
| 104099 | 0.134 | 2509 | 1417443 | 0.049 | 2509 | 1417443 | 0.049 | 6240 | 1417443 | 0.049 | 6430 | 5896 | 626 | 2246 | 9142 | FALSE | collagen type IV, alpha 2        |
| 98787  | 0.028 | 3581 | 1448106 | 0.028 | 3581 | 1448106 | 0.028 | 6240 | 1448106 | 0.028 | 6430 | 5896 | 626 | 2246 | 9142 | FALSE | collagen type IV, alpha 2        |
| 97003  | 0.023 | 4715 | 1450790 | 0.024 | 4715 | 1450790 | 0.024 | 6240 | 1450790 | 0.024 | 6430 | 5896 | 626 | 2246 | 9142 | FALSE | collagen type IV, alpha 2        |
| 99406  | 0.038 | 6338 | 1450834 | 0.038 | 6338 | 1450834 | 0.038 | 6240 | 1450834 | 0.038 | 6430 | 5896 | 626 | 2246 | 9142 | FALSE | collagen type IV, alpha 2        |
| 100706 | 0.002 | 5521 | 1448855 | 0.004 | 5521 | 1448855 | 0.004 | 6240 | 1448855 | 0.004 | 6430 | 5896 | 626 | 2246 | 9142 | FALSE | collagen type IV, alpha 2        |
| 98389  | 0.005 | 8261 | 1451743 | 0.005 | 8261 | 1451743 | 0.005 | 6240 | 1451743 | 0.005 | 6430 | 5896 | 626 | 2246 | 9142 | FALSE | collagen type IV, alpha 2        |
| 96201  | 0.009 | 4426 | 1422244 | 0.020 | 4426 | 1422244 | 0.020 | 6240 | 1422244 | 0.020 | 6430 | 5896 | 626 | 2246 | 9142 | FALSE | collagen type IV, alpha 2        |
| 103956 | 0.006 | 8168 | 1419216 | 0.014 | 8168 | 1419216 | 0.014 | 6240 | 1419216 | 0.014 | 6430 | 5896 | 626 | 2246 | 9142 | FALSE | collagen type IV, alpha 2        |
| 96218  | 0.130 | 8127 | 1424866 | 0.040 | 8127 | 1424866 | 0.040 | 6240 | 1424866 | 0.040 | 6430 | 5896 | 626 | 2246 | 9142 | FALSE | collagen type IV, alpha 2        |
| 96007  | 0.041 | 4071 | 1451986 | 0.026 | 4071 | 1451986 | 0.026 | 6240 | 1451986 | 0.026 | 6430 | 5896 | 626 | 2246 | 9142 | FALSE | collagen type IV, alpha 2        |
| 107015 | 0.091 | 3351 | 1420849 | 0.063 | 3351 | 1420849 | 0.063 | 6240 | 1420849 | 0.063 | 6430 | 5896 | 626 | 2246 | 9142 | FALSE | collagen type IV, alpha 2        |
| 104083 | 0.005 | 6629 | 1438391 | 0.021 | 6629 | 1438391 | 0.021 | 6240 | 1438391 | 0.021 | 6430 | 5896 | 626 | 2246 | 9142 | FALSE | collagen type IV, alpha 2        |
| 104623 | 0.101 | 2827 | 1417276 | 0.061 | 2827 | 1417276 | 0.061 | 6240 | 1417276 | 0.061 | 6430 | 5896 | 626 | 2246 | 9142 | FALSE | collagen type IV, alpha 2        |
| 93026  | 0.001 | 5242 | 1417457 | 0.001 | 5242 | 1417457 | 0.001 | 6240 | 1417457 | 0.001 | 6430 | 5896 | 626 | 2246 | 9142 | FALSE | collagen type IV, alpha 2        |
| 97123  | 0.050 | 5929 | 1449854 | 0.080 | 5929 | 1449854 | 0.080 | 6240 | 1449854 | 0.080 | 6430 | 5896 | 626 | 2246 | 9142 | FALSE | collagen type IV, alpha 2        |
| 97469  | 0.015 | 6660 | 1452957 | 0.025 | 6660 | 1452957 | 0.025 | 6240 | 1452957 | 0.025 | 6430 | 5896 | 626 | 2246 | 9142 | FALSE | collagen type IV, alpha 2        |
| 140588 | 0.080 | 4620 | 1428164 | 0.073 | 4620 | 1428164 | 0.073 | 6240 | 1428164 | 0.073 | 6430 | 5896 | 626 | 2246 | 9142 | FALSE | collagen type IV, alpha 2        |
| 95569  | 0.003 | 6886 | 1419649 | 0.009 | 6886 | 1419649 | 0.009 | 6240 | 1419649 | 0.009 | 6430 | 5896 | 626 | 2246 | 9142 | FALSE | collagen type IV, alpha 2        |
| 103647 | 0.225 | 8081 | 1448768 | 0.039 | 8081 | 1448768 | 0.039 | 6240 | 1448768 | 0.039 | 6430 | 5896 | 626 | 2246 | 9142 | FALSE | collagen type IV, alpha 2        |
| 103847 | 0.091 | 3899 | 1424469 | 0.027 | 3899 | 1424469 | 0.027 | 6240 | 1424469 | 0.027 | 6430 | 5896 | 626 | 2246 | 9142 | FALSE | collagen type IV, alpha 2        |
| 101371 | 0.091 | 3899 | 1424469 | 0.027 | 3899 | 1424469 | 0.027 | 6240 | 1424469 | 0.027 | 6430 | 5896 | 626 | 2246 | 9142 | FALSE | collagen type IV, alpha 2        |
| 99095  | 0.102 | 5095 | 1424301 | 0.042 | 5095 | 1424301 | 0.042 | 6240 | 1424301 | 0.042 | 6430 | 5896 | 626 | 2246 | 9142 | FALSE | collagen type IV, alpha 2        |
| 104428 | 0.026 | 6972 | 1417173 | 0.081 | 6972 | 1417173 | 0.081 | 6240 | 1417173 | 0.081 | 6430 | 5896 | 626 | 2246 | 9142 | FALSE | collagen type IV, alpha 2        |
| 94408  | 0.025 | 4081 | 1451000 | 0.022 | 4081 | 1451000 | 0.022 | 6240 | 1451000 | 0.022 | 6430 | 5896 | 626 | 2246 | 9142 | FALSE | collagen type IV, alpha 2        |
| 104623 | 0.070 | 3397 | 1419655 | 0.096 | 3397 | 1419655 | 0.096 | 6240 | 1419655 | 0.096 | 6430 | 5896 | 626 | 2246 | 9142 | FALSE | collagen type IV, alpha 2        |
| 104047 | 0.000 | 4681 | 1415173 | 0.001 | 4681 | 1415173 | 0.001 | 6240 | 1415173 | 0.001 | 6430 | 5896 | 626 | 2246 | 9142 | FALSE | collagen type IV, alpha 2        |
| 94135  | 0.048 | 5319 | 1418159 | 0.048 | 5319 | 1418159 | 0.048 | 6240 | 1418159 | 0.048 | 6430 | 5896 | 626 | 2246 | 9142 | FALSE | collagen type IV, alpha 2        |
| 99371  | 0.003 | 4620 | 1424070 | 0.082 | 4620 | 1424070 | 0.082 | 6240 | 1424070 | 0.082 | 6430 | 5896 | 626 | 2246 | 9142 | FALSE | collagen type IV, alpha 2        |
| 99440  | 0.003 | 4115 | 1423008 | 0.000 | 4115 | 1423008 | 0.000 | 6240 | 1423008 | 0.000 | 6430 | 5896 | 626 | 2246 | 9142 | FALSE | collagen type IV, alpha 2        |
| 99440  | 0.003 | 4115 | 1423008 | 0.000 | 4115 | 1423008 | 0.000 | 6240 | 1423008 | 0.000 | 6430 | 5896 | 626 | 2246 | 9142 | FALSE | collagen type IV, alpha 2        |
| 102065 | 0.044 | 5851 | 1435388 | 0.058 | 5851 | 1435388 | 0.058 | 6240 | 1435388 | 0.058 | 6430 | 5896 | 626 | 2246 | 9142 | FALSE | collagen type IV, alpha 2        |
| 96319  | 0.038 | 4424 | 1420796 | 0.040 | 4424 | 1420796 | 0.040 | 6240 | 1420796 | 0.040 | 6430 | 5896 | 626 | 2246 | 9142 | FALSE | collagen type IV, alpha 2        |
| 99294  | 0.021 | 7252 | 1419294 | 0.028 | 7252 | 1419294 | 0.028 | 6240 | 1419294 | 0.028 | 6430 | 5896 | 626 | 2246 | 9142 | FALSE | collagen type IV, alpha 2        |
| 101891 | 0.031 | 6271 | 1418152 | 0.028 | 6271 | 1418152 | 0.028 | 6240 | 1418152 | 0.028 | 6430 | 5896 | 626 | 2246 | 9142 | FALSE | collagen type IV, alpha 2        |
| 104483 | 0.007 | 8219 | 1421381 | 0.069 | 8219 | 1421381 | 0.069 | 6240 | 1421381 | 0.069 | 6430 | 5896 | 626 | 2246 | 9142 | FALSE | collagen type IV, alpha 2        |
| 94703  | 0.005 | 3688 | 1419035 | 0.006 | 3688 | 1419035 | 0.006 | 6240 | 1419035 | 0.006 | 6430 | 5896 | 626 | 2246 | 9142 | FALSE | collagen type IV, alpha 2        |
| 94151  | 0.049 | 4697 | 1427871 | 0.026 | 4697 | 1427871 | 0.026 | 6240 | 1427871 | 0.026 | 6430 | 5896 | 626 | 2246 | 9142 | FALSE | collagen type IV, alpha 2        |
| 104151 |       |      |         |       |      |         |       |      |         |       |      |      |     |      |      |       |                                  |







|         |        |      |         |        |      |         |        |      |         |        |      |         |        |      |      |      |       |                                                      |                                                      |
|---------|--------|------|---------|--------|------|---------|--------|------|---------|--------|------|---------|--------|------|------|------|-------|------------------------------------------------------|------------------------------------------------------|
| 100985  | 0.150  | 2724 | 1448779 | 0.043  | 4573 | 100985  | 0.020  | 6484 | 1448720 | 0.013  | 8191 | 100985  | 0.036  | 6483 | 3863 | 4927 | FALSE | C/EBP $\beta$ interaction; p19INK4 interaction       |                                                      |
| 100986  | -0.040 | 6693 | 1438539 | 0.116  | 4290 | 100986  | -0.038 | 6484 | 1438539 | -0.028 | 7961 | 100986  | -0.028 | 6388 | 1519 | 9224 | FALSE | RNA polymerase II interaction                        |                                                      |
| 92242   | -0.026 | 6693 | 1417789 | -0.034 | 6079 | 92242   | -0.039 | 3616 | 1417789 | 0.020  | 7523 | 92242   | -0.066 | 6289 | 75   | 1198 | 9227  | FALSE                                                | small DNAse1 (CC motif) bound 11                     |
| 90518   | 0.018  | 7350 | 1449256 | 0.038  | 9945 | 90518   | -0.066 | 4076 | 1449256 | 0.076  | 6697 | 90518   | 0.076  | 6290 | 125  | 1021 | FALSE | RNA polymerase II interaction                        |                                                      |
| 181867  | -0.079 | 5022 | 1450775 | 0.033  | 7808 | 181867  | -0.046 | 5940 | 1450775 | -0.046 | 6697 | 181867  | -0.046 | 6291 | 175  | 1002 | FALSE | Mutually exclusive occupancy                         |                                                      |
| 94437   | -0.025 | 7660 | 1455534 | -0.115 | 5936 | 94437   | -0.115 | 6172 | 1455534 | 0.101  | 6172 | 94437   | -0.101 | 6292 | 175  | 1002 | FALSE | mutually exclusive occupancy                         |                                                      |
| 94043   | 0.033  | 5946 | 1424273 | 0.091  | 5693 | 94043   | 0.091  | 5693 | 1424273 | 0.091  | 5693 | 94043   | 0.091  | 6293 | 875  | 1111 | 6429  | FALSE                                                | co-occupancy with cohesin 1                          |
| 90289   | -0.086 | 7951 | 1417049 | -0.095 | 7464 | 90289   | -0.095 | 6636 | 1417049 | 0.080  | 6439 | 90289   | -0.080 | 6294 | 875  | 1515 | 9119  | FALSE                                                | co-occupancy with cohesin 1                          |
| 164647  | 0.016  | 4433 | 1448774 | 0.004  | 6185 | 164647  | 0.004  | 6185 | 1448774 | 0.004  | 6185 | 164647  | 0.004  | 6295 | 26   | 1502 | 301   | FALSE                                                | transcription factor 2-like 2                        |
| 964569  | 0.033  | 6149 | 1420761 | -0.008 | 6149 | 964569  | -0.008 | 6149 | 1420761 | -0.008 | 6149 | 964569  | -0.008 | 6296 | 142  | 1523 | 726   | FALSE                                                | enhancer; initiator; mediator; silencer noninducible |
| 927817  | -0.054 | 6262 | 1448373 | 0.007  | 6347 | 927817  | 0.007  | 6347 | 1448373 | 0.007  | 6347 | 927817  | 0.007  | 6297 | 126  | 1493 | 1441  | FALSE                                                | enhancer; initiator; mediator; silencer noninducible |
| 103356  | 0.004  | 6281 | 1435228 | -0.082 | 6104 | 103356  | -0.082 | 6104 | 1435228 | -0.082 | 6104 | 103356  | -0.082 | 6298 | 126  | 1493 | 1441  | FALSE                                                | enhancer; initiator; mediator; silencer noninducible |
| 96506   | -0.016 | 7947 | 1416186 | -0.045 | 6465 | 96506   | -0.045 | 6465 | 1416186 | -0.045 | 6465 | 96506   | -0.045 | 6299 | 126  | 1493 | 1441  | FALSE                                                | enhancer; initiator; mediator; silencer noninducible |
| 100987  | 0.016  | 5724 | 1427078 | 0.007  | 5724 | 100987  | 0.007  | 5724 | 1427078 | 0.007  | 5724 | 100987  | 0.007  | 6300 | 375  | 2040 | 6266  | FALSE                                                | enhancer; initiator; mediator; silencer noninducible |
| 103279  | 0.089  | 4828 | 1418153 | 0.007  | 8181 | 103279  | 0.007  | 8181 | 1418153 | 0.007  | 8181 | 103279  | 0.007  | 6301 | 375  | 2040 | 6266  | FALSE                                                | enhancer; initiator; mediator; silencer noninducible |
| 96267   | -0.048 | 5830 | 1451099 | -0.025 | 5830 | 96267   | -0.025 | 5830 | 1451099 | -0.025 | 5830 | 96267   | -0.025 | 6302 | 375  | 2040 | 6266  | FALSE                                                | enhancer; initiator; mediator; silencer noninducible |
| 1023257 | 0.027  | 6687 | 1454977 | -0.004 | 6838 | 1023257 | -0.004 | 6838 | 1454977 | -0.004 | 6838 | 1023257 | -0.004 | 6303 | 375  | 2040 | 6266  | FALSE                                                | enhancer; initiator; mediator; silencer noninducible |
| 1046474 | -0.021 | 7327 | 1415220 | -0.037 | 6491 | 1046474 | -0.037 | 6491 | 1415220 | -0.037 | 6491 | 1046474 | -0.037 | 6304 | 375  | 2040 | 6266  | FALSE                                                | enhancer; initiator; mediator; silencer noninducible |
| 94202   | 0.026  | 7251 | 1427028 | 0.025  | 7493 | 94202   | 0.025  | 7493 | 1427028 | 0.025  | 7493 | 94202   | 0.025  | 6305 | 4376 | 1420 | 9781  | FALSE                                                | enhancer; initiator; mediator; silencer noninducible |
| 92810   | 0.067  | 6581 | 142610  | -0.014 | 7100 | 92810   | 0.060  | 7100 | 142610  | 0.060  | 7100 | 92810   | 0.060  | 6306 | 4376 | 1420 | 9781  | FALSE                                                | enhancer; initiator; mediator; silencer noninducible |
| 96333   | 0.034  | 5299 | 1449303 | 0.016  | 7974 | 96333   | 0.016  | 7974 | 1449303 | 0.016  | 7974 | 96333   | 0.016  | 6307 | 1420 | 9781 | FALSE | enhancer; initiator; mediator; silencer noninducible |                                                      |
| 99585   | -0.055 | 6466 | 1449375 | 0.016  | 7927 | 99585   | 0.016  | 7927 | 1449375 | 0.016  | 7927 | 99585   | 0.016  | 6308 | 1420 | 9781 | FALSE | enhancer; initiator; mediator; silencer noninducible |                                                      |
| 102918  | 0.033  | 6231 | 1447199 | 0.088  | 5347 | 102918  | 0.088  | 5347 | 1447199 | 0.088  | 5347 | 102918  | 0.088  | 6309 | 1420 | 9781 | FALSE | enhancer; initiator; mediator; silencer noninducible |                                                      |
| 100988  | 0.015  | 7921 | 1418173 | 0.055  | 8206 | 100988  | 0.055  | 8206 | 1418173 | 0.055  | 8206 | 100988  | 0.055  | 6310 | 1420 | 9781 | FALSE | enhancer; initiator; mediator; silencer noninducible |                                                      |
| 101012  | 0.033  | 6681 | 1432529 | 0.006  | 6673 | 101012  | 0.006  | 6673 | 1432529 | 0.006  | 6673 | 101012  | 0.006  | 6311 | 1420 | 9781 | FALSE | enhancer; initiator; mediator; silencer noninducible |                                                      |
| 98858   | 0.073  | 4766 | 1449908 | 0.096  | 4808 | 98858   | 0.096  | 4808 | 1449908 | 0.096  | 4808 | 98858   | 0.096  | 6312 | 1420 | 9781 | FALSE | enhancer; initiator; mediator; silencer noninducible |                                                      |
| 102899  | -0.038 | 6294 | 1417790 | -0.082 | 4415 | 102899  | -0.082 | 4415 | 1417790 | -0.082 | 4415 | 102899  | -0.082 | 6313 | 1420 | 9781 | FALSE | enhancer; initiator; mediator; silencer noninducible |                                                      |
| 102869  | 0.046  | 2584 | 1417200 | 0.038  | 6663 | 102869  | 0.038  | 6663 | 1417200 | 0.038  | 6663 | 102869  | 0.038  | 6314 | 1420 | 9781 | FALSE | enhancer; initiator; mediator; silencer noninducible |                                                      |
| 97220   | 0.045  | 6450 | 1448034 | 0.013  | 8031 | 97220   | 0.013  | 8031 | 1448034 | 0.013  | 8031 | 97220   | 0.013  | 6315 | 1420 | 9781 | FALSE | enhancer; initiator; mediator; silencer noninducible |                                                      |
| 102645  | 0.024  | 7711 | 1438035 | 0.006  | 8148 | 102645  | 0.006  | 8148 | 1438035 | 0.006  | 8148 | 102645  | 0.006  | 6316 | 1420 | 9781 | FALSE | enhancer; initiator; mediator; silencer noninducible |                                                      |
| 104117  | -0.065 | 6469 | 1449197 | 0.082  | 5037 | 104117  | 0.082  | 5037 | 1449197 | 0.082  | 5037 | 104117  | 0.082  | 6317 | 1420 | 9781 | FALSE | enhancer; initiator; mediator; silencer noninducible |                                                      |
| 99827   | 0.027  | 7406 | 1429299 | -0.035 | 7205 | 99827   | -0.035 | 7205 | 1429299 | -0.035 | 7205 | 99827   | -0.035 | 6318 | 1420 | 9781 | FALSE | enhancer; initiator; mediator; silencer noninducible |                                                      |
| 98420   | 0.018  | 7814 | 1459843 | 0.033  | 6998 | 98420   | 0.033  | 6998 | 1459843 | 0.033  | 6998 | 98420   | 0.033  | 6319 | 1420 | 9781 | FALSE | enhancer; initiator; mediator; silencer noninducible |                                                      |
| 96268   | 0.072  | 8181 | 1422299 | 0.009  | 7500 | 96268   | 0.009  | 7500 | 1422299 | 0.009  | 7500 | 96268   | 0.009  | 6320 | 1420 | 9781 | FALSE | enhancer; initiator; mediator; silencer noninducible |                                                      |
| 102648  | 0.018  | 7439 | 1420378 | 0.047  | 5231 | 102648  | 0.047  | 5231 | 1420378 | 0.047  | 5231 | 102648  | 0.047  | 6321 | 1420 | 9781 | FALSE | enhancer; initiator; mediator; silencer noninducible |                                                      |
| 9139    | 0.122  | 3270 | 1450500 | 0.020  | 7955 | 9139    | 0.020  | 7955 | 1450500 | 0.020  | 7955 | 9139    | 0.020  | 6322 | 1420 | 9781 | FALSE | enhancer; initiator; mediator; silencer noninducible |                                                      |
| 104140  | 0.113  | 3471 | 1424427 | -0.043 | 7244 | 104140  | -0.043 | 7244 | 1424427 | -0.043 | 7244 | 104140  | -0.043 | 6323 | 1420 | 9781 | FALSE | enhancer; initiator; mediator; silencer noninducible |                                                      |
| 99349   | 0.040  | 4788 | 1421872 | -0.011 | 8192 | 99349   | -0.011 | 8192 | 1421872 | -0.011 | 8192 | 99349   | -0.011 | 6324 | 1420 | 9781 | FALSE | enhancer; initiator; mediator; silencer noninducible |                                                      |
| 97374   | 0.016  | 7458 | 1449287 | 0.133  | 6245 | 97374   | 0.133  | 6245 | 1449287 | 0.133  | 6245 | 97374   | 0.133  | 6325 | 1420 | 9781 | FALSE | enhancer; initiator; mediator; silencer noninducible |                                                      |
| 97872   | 0.089  | 4991 | 1450514 | 0.044  | 6436 | 97872   | 0.044  | 6436 | 1450514 | 0.044  | 6436 | 97872   | 0.044  | 6326 | 1420 | 9781 | FALSE | enhancer; initiator; mediator; silencer noninducible |                                                      |
| 96788   | -0.023 | 7425 | 1416708 | 0.112  | 7958 | 96788   | 0.112  | 7958 | 1416708 | 0.112  | 7958 | 96788   | 0.112  | 6327 | 1420 | 9781 | FALSE | enhancer; initiator; mediator; silencer noninducible |                                                      |
| 101192  | 0.026  | 8121 | 1420348 | 0.116  | 3903 | 101192  | 0.116  | 3903 | 1420348 | 0.116  | 3903 | 101192  | 0.116  | 6328 | 1420 | 9781 | FALSE | enhancer; initiator; mediator; silencer noninducible |                                                      |
| 100802  | 0.109  | 7420 | 1422703 | -0.033 | 8421 | 100802  | -0.033 | 8421 | 1422703 | -0.033 | 8421 | 100802  | -0.033 | 6329 | 1420 | 9781 | FALSE | enhancer; initiator; mediator; silencer noninducible |                                                      |
| 99041   | 0.041  | 5129 | 1431345 | -0.037 | 6750 | 99041   | -0.037 | 6750 | 1431345 | -0.037 | 6750 | 99041   | -0.037 | 6330 | 1420 | 9781 | FALSE | enhancer; initiator; mediator; silencer noninducible |                                                      |
| 99880   | -0.005 | 7547 | 1432425 | 0.089  | 5706 | 99880   | 0.089  | 5706 | 1432425 | 0.089  | 5706 | 99880   | 0.089  | 6331 | 1420 | 9781 | FALSE | enhancer; initiator; mediator; silencer noninducible |                                                      |
| 97053   | 0.093  | 5477 | 1422294 | 0.002  | 8462 | 97053   | 0.002  | 8462 | 1422294 | 0.002  | 8462 | 97053   | 0.002  | 6332 | 1420 | 9781 | FALSE | enhancer; initiator; mediator; silencer noninducible |                                                      |
| 102689  | -0.054 | 5429 | 1428988 | -0.001 | 6671 | 102689  | -0.001 | 6671 | 1428988 | -0.001 | 6671 | 102689  | -0.001 | 6333 | 1420 | 9781 | FALSE | enhancer; initiator; mediator; silencer noninducible |                                                      |
| 94511   | 0.000  | 8518 | 1428134 | 0.075  | 4990 | 94511   | 0.075  | 4990 | 1428134 | 0.075  | 4990 | 94511   | 0.075  | 6334 | 1420 | 9781 | FALSE | enhancer; initiator; mediator; silencer noninducible |                                                      |
| 102626  | 0.044  | 6251 | 1416270 | 0.004  | 6014 | 102626  | 0.004  | 6014 | 1416270 | 0.004  | 6014 | 102626  | 0.004  | 6335 | 1420 | 9781 | FALSE | enhancer; initiator; mediator; silencer noninducible |                                                      |
| 100974  | 0.022  | 7320 | 1448868 | 0.028  | 7492 | 100974  | 0.028  | 7492 | 1448868 | 0.028  | 7492 | 100974  | 0.028  | 6336 | 1420 | 9781 | FALSE | enhancer; initiator; mediator; silencer noninducible |                                                      |
| 102576  | -0.004 | 6321 | 1419770 | -0.006 | 5489 | 102576  | -0.006 | 5489 | 1419770 | -0.006 | 5489 | 102576  | -0.006 | 6337 | 1420 | 9781 | FALSE | enhancer; initiator; mediator; silencer noninducible |                                                      |
| 101912  | 0.009  | 6692 | 1421586 | 0.059  | 6736 | 101912  | 0.059  | 6736 | 1421586 | 0.059  | 6736 | 101912  | 0.059  | 6338 | 1420 | 9781 | FALSE | enhancer; initiator; mediator; silencer noninducible |                                                      |
| 99263   | 0.024  | 7104 | 1443117 | 0.038  | 6934 | 99263   | 0.038  | 6934 | 1443117 | 0.038  | 6934 | 99263   | 0.038  | 6339 | 1420 | 9781 | FALSE | enhancer; initiator; mediator; silencer noninducible |                                                      |
| 101408  | 0.028  | 7256 | 1417007 | -0.001 | 8803 | 101408  | -0.001 | 8803 | 1417007 | -0.001 | 8803 | 101408  | -0.001 | 6340 | 1420 | 9781 | FALSE | enhancer; initiator; mediator; silencer noninducible |                                                      |
| 93337   | 0.040  | 7256 | 1417007 | -0.001 | 8803 | 93337   | -0.001 | 8803 | 1417007 | -0.001 | 8803 | 93337   | -0.001 | 6341 | 1420 | 9781 | FALSE | enhancer; initiator; mediator; silencer noninducible |                                                      |
| 102687  | 0.079  | 3859 | 1450589 | 0.033  | 6811 | 102687  | 0.033  | 6811 | 1450589 | 0.033  | 6811 | 102687  | 0.033  | 6342 | 1420 | 9781 | FALSE | enhancer; initiator; mediator; silencer noninducible |                                                      |
| 102340  | 0.024  | 7405 | 1449384 | 0.075  | 4166 | 102340  | 0.075  | 4166 | 1449384 | 0.075  | 4166 | 102340  | 0.075  | 6343 | 1420 | 9781 | FALSE | enhancer; initiator; mediator; silencer noninducible |                                                      |
| 102167  | 0.015  | 7890 | 1422383 | 0.132  | 3037 | 102167  | 0.132  | 3037 | 1422383 | 0.132  | 3037 | 102167  | 0.132  | 6344 | 1420 | 9781 | FALSE | enhancer; initiator; mediator; silencer noninducible |                                                      |
| 102078  | 0.001  | 8431 | 1424726 | 0.118  | 2719 | 102078  | 0.118  | 2719 | 1424726 | 0.118  | 2719 | 102078  | 0.118  | 6345 | 1420 | 9781 | FALSE | enhancer; initiator; mediator; silencer noninducible |                                                      |
| 94800   | 0.077  | 6537 | 1415259 | -0.003 | 8444 | 94800   | -0.003 | 8444 | 1415259 | -0.003 | 8444 | 94800   | -0.003 | 6346 | 1420 | 9781 | FALSE | enhancer; initiator; mediator; silencer noninducible |                                                      |
| 98416   | 0.043  | 7159 | 1451233 | 0.059  | 8199 | 98416   | 0.059  | 8199 | 1451233 | 0.059  | 8199 | 98416   | 0.059  | 6347 | 1420 | 9781 | FALSE | enhancer; initiator; mediator; silencer noninducible |                                                      |
| 94125   | 0.002  | 7313 | 1454059 | 0.004  | 6583 | 94125   | 0.004  | 6583 | 1454059 | 0.004  | 6583 | 94125   | 0.004  | 6348 | 1420 | 9781 | FALSE | enhancer; initiator; mediator; silencer noninducible |                                                      |
| 91255   | 0.002  |      |         |        |      |         |        |      |         |        |      |         |        |      |      |      |       |                                                      |                                                      |
